# Supplementary material for: Detection and Alignment of 3D Domain Swapping Proteins Using Angle-Distance Image-Based Secondary Structural Matching Techniques
Source: PubMed Central journal article supplement (PMC2955075; doi:10.1371/journal.pone.0013361), 2010-10-14
Supplement: pone.0013361.s001.pdf [file pone.0013361.s001.pdf]

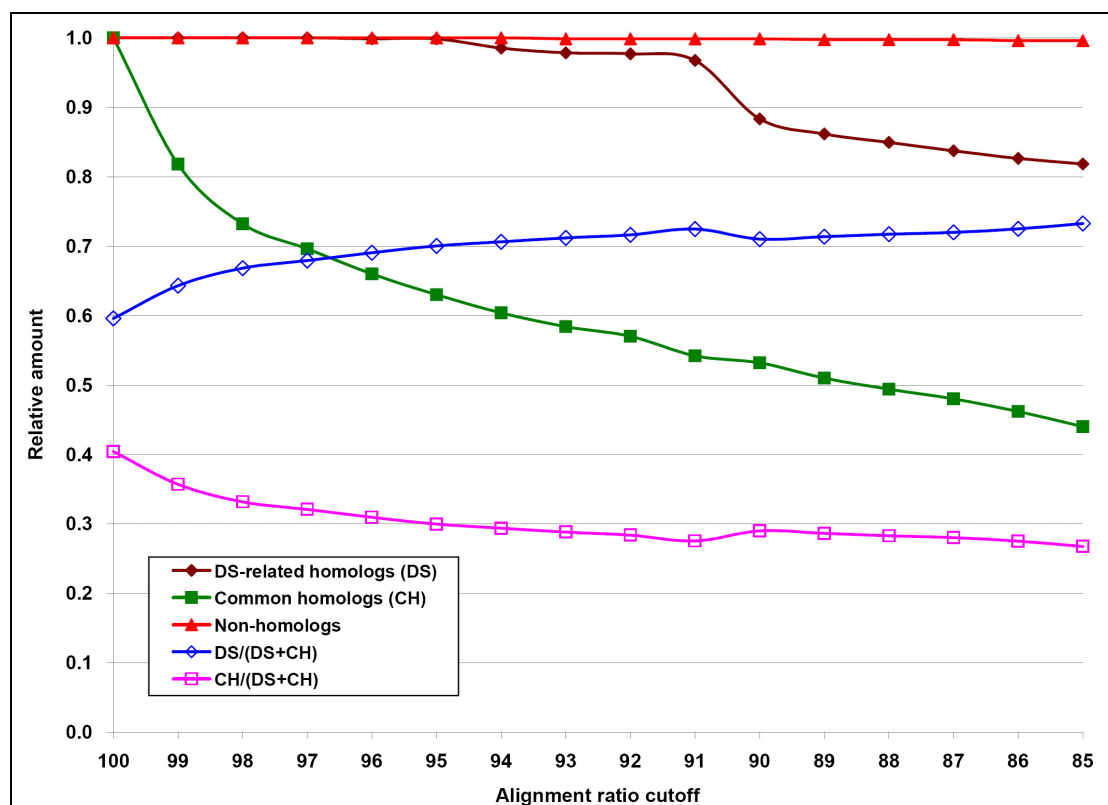

**Figure S1. The number of DS-related homologs, common homologs and non-homologs remaining in the test set from the experiments presented in Fig. 2 as the alignment ratio cutoff decreases.** The alignment cutoff (x-axis) applied in this study is designed to remove globally-superimposeable homologous protein pairs from the testing datasets. Since many common homologous pairs are globally-superimposeable, as this cutoff lowers, the amount of common homologs (the green curve) decreases much more rapidly than the amount of DS-related homologs, which are only partially-superimposeable, decreases (see the brown curve). Meanwhile, the amount of non-homologous pairs (the orange curve) remains nearly unchanged. Interestingly, relative to the amount of all homologs, including DS-related and common ones, the amount of DS-related homologs remaining in the dataset increases as the alignment ratio cutoff becomes lower within the tested range (see the blue curve). Alignment ratios were calculated by FAST [30]. Raw data of this figure are listed in the following table.

| Alignment ratio cutoff (%) | DS-related homologs (DS) (pairs) | Common homologs (CH) (pairs) | Non-homologs (NH) (pairs) | DS (%) | CH (%) | NH (%) |
|----------------------------|----------------------------------|------------------------------|---------------------------|--------|--------|--------|
| 100                        | 737                              | 500                          | 721                       | 1.000  | 1.000  | 1.000  |
| 99                         | 737                              | 409                          | 721                       | 1.000  | 0.818  | 1.000  |
| 98                         | 737                              | 366                          | 721                       | 1.000  | 0.732  | 1.000  |
| 97                         | 737                              | 348                          | 721                       | 1.000  | 0.696  | 1.000  |
| 96                         | 736                              | 330                          | 721                       | 0.999  | 0.660  | 1.000  |
| 95                         | 736                              | 315                          | 721                       | 0.999  | 0.630  | 1.000  |
| 94                         | 726                              | 302                          | 721                       | 0.985  | 0.604  | 1.000  |
| 93                         | 721                              | 292                          | 720                       | 0.978  | 0.584  | 0.999  |
| 92                         | 720                              | 285                          | 720                       | 0.977  | 0.570  | 0.999  |
| 91                         | 713                              | 271                          | 720                       | 0.967  | 0.542  | 0.999  |
| 90                         | 651                              | 266                          | 720                       | 0.883  | 0.532  | 0.999  |
| 89                         | 635                              | 255                          | 719                       | 0.862  | 0.510  | 0.997  |
| 88                         | 626                              | 247                          | 719                       | 0.849  | 0.494  | 0.997  |
| 87                         | 617                              | 240                          | 719                       | 0.837  | 0.480  | 0.997  |
| 86                         | 609                              | 231                          | 718                       | 0.826  | 0.462  | 0.996  |
| 85                         | 603                              | 220                          | 718                       | 0.818  | 0.440  | 0.996  |
