# Supplementary material for: Detection and Alignment of 3D Domain Swapping Proteins Using Angle-Distance Image-Based Secondary Structural Matching Techniques
Source: PubMed Central journal article supplement (PMC2955075; doi:10.1371/journal.pone.0013361), 2010-10-14
Supplement: pone.0013361.s002.pdf [file pone.0013361.s002.pdf]

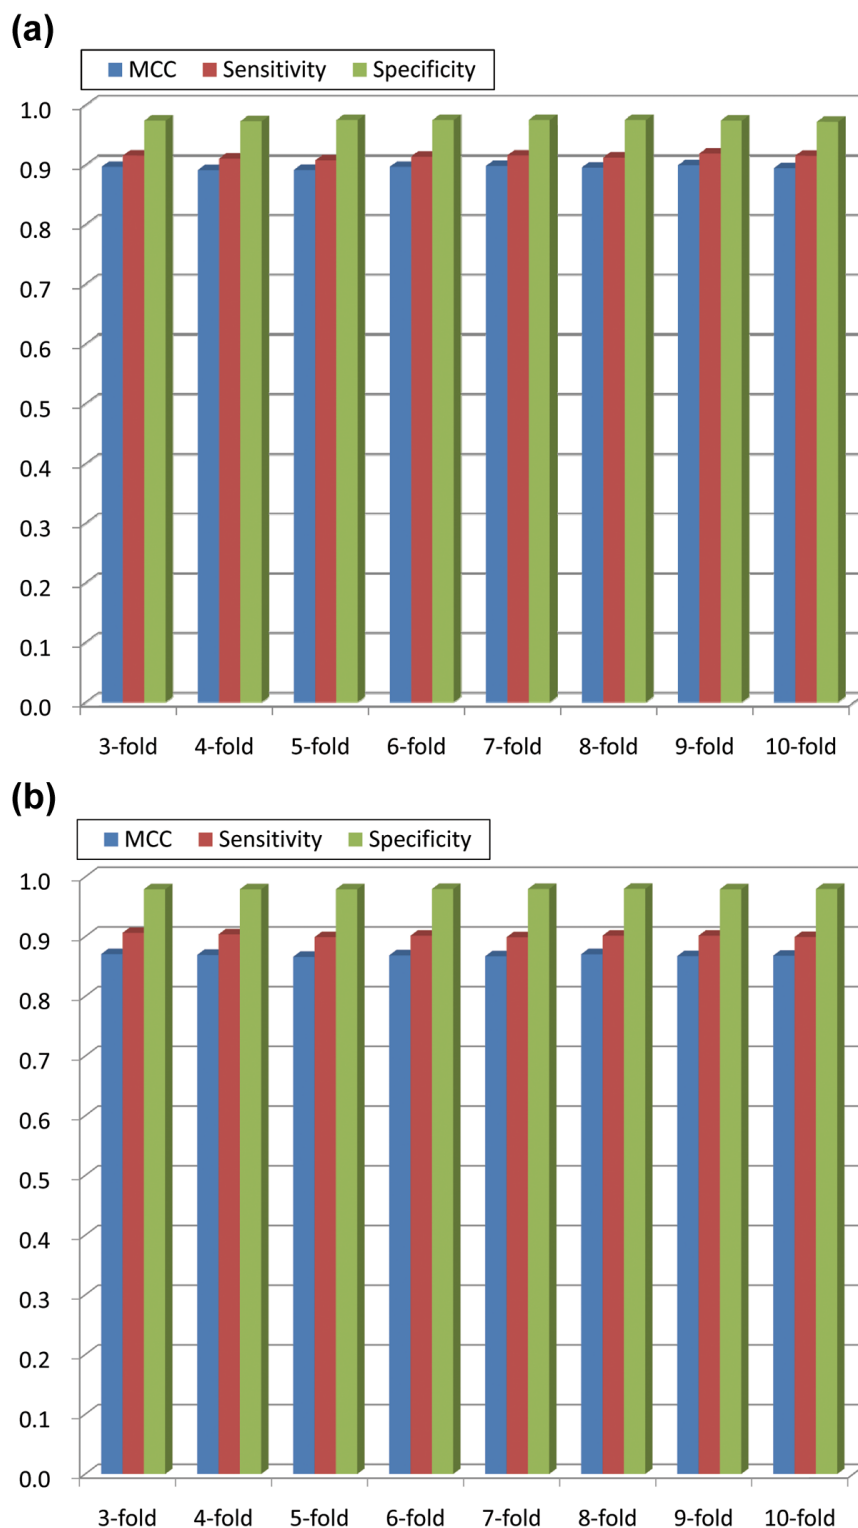

**Figure S2. Stability evaluations of the discriminatory model of the proposed method by  $k$ -fold cross-validations.** The stability of the discriminatory model applied in the proposed DS-scoring scheme was evaluated based on two datasets. **(a)** Evaluations based on Dataset L. **(b)** Evaluations based on Dataset M. In both experiments, only the DS-related homologs were treated as the positive data, while common homologs and non-homologs were used as the negative data.
