# Supplementary material for: Detection and Alignment of 3D Domain Swapping Proteins Using Angle-Distance Image-Based Secondary Structural Matching Techniques
Source: PubMed Central journal article supplement (PMC2955075; doi:10.1371/journal.pone.0013361), 2010-10-14
Supplement: pone.0013361.s005.pdf [file pone.0013361.s005.pdf]

**Table S1. DS-detecting performance of DynDom assessed based on Eisenberg’s DS dataset**

| Closed form             | Open form    | Hinge loops examined by [2] |                     | Hinge loops identified by DynDom [35] |                     | Length difference of hinge loops <sup>1</sup> (residues) | Shift of the centers of hinge loops <sup>1</sup> (residues) |
|-------------------------|--------------|-----------------------------|---------------------|---------------------------------------|---------------------|----------------------------------------------------------|-------------------------------------------------------------|
|                         |              | Range <sub>e</sub>          | Length <sub>e</sub> | Range <sub>i</sub>                    | Length <sub>i</sub> |                                                          |                                                             |
| 1brnL                   | <b>1yvsA</b> | 37-41                       | 5                   | 37-44                                 | 7                   | -2                                                       | 1.5                                                         |
| 1griA                   | <b>1fyrA</b> | 121-123                     | 3                   | 120-123                               | 3                   | 0                                                        | 0.5                                                         |
| <b>1griA</b>            | 1fyrA        | 121-123                     | 3                   | 120-123                               | 3                   | 0                                                        | 0.5                                                         |
| 1mdtA                   | <b>1ddtA</b> | 379-387                     | 9                   | 379-388                               | 9                   | 0                                                        | 0.5                                                         |
| 1hngA                   | <b>1cdcA</b> | 44-50                       | 7                   | 43-50                                 | 7                   | 0                                                        | 0.5                                                         |
| 1cunA                   | <b>2spcA</b> | 72-75                       | 4                   | 76-79                                 | 3                   | 1                                                        | 4                                                           |
| 2ezmA                   | <b>3ezmA</b> | 50-53                       | 4                   | 49-50                                 | 1                   | 3                                                        | 2                                                           |
| 1cewI                   | <b>1g96A</b> | 55-59                       | 5                   | 55-57                                 | 2                   | 3                                                        | 1                                                           |
| 1pv3A                   | <b>1k04A</b> | 943-948                     | 6                   | 933-934                               | 1                   | 5                                                        | 12                                                          |
| 4icbA                   | <b>1ht9A</b> | 38-47                       | 10                  | 42-47                                 | 5                   | 5                                                        | 2                                                           |
| 5rsaA                   | <b>1bsrA</b> | 15-22                       | 8                   | 22-23                                 | 1                   | 7                                                        | 4                                                           |
| 1q1xA                   | <b>1i4mA</b> | 188-198                     | 11                  | 203-207                               | 4                   | 7                                                        | 12                                                          |
| <b>1orcA</b>            | 5croA        | 55-56                       | 2                   |                                       |                     | N/A*                                                     |                                                             |
| <b>1sncA</b>            | 1sndA        | 112-120                     | 9                   |                                       |                     | N/A*                                                     |                                                             |
| <b>1mupA</b>            | 1obpA        | 126-130                     | 5                   |                                       |                     | N/A*                                                     |                                                             |
| <b>1fynA</b>            | 1aojA        | 112-118                     | 7                   |                                       |                     | N/A*                                                     |                                                             |
| <b>1gmfA</b>            | 1hulA        | 87-99                       | 13                  |                                       |                     | N/A*                                                     |                                                             |
| 1msbA                   | <b>1ixxA</b> | 72-75                       | 4                   |                                       |                     | N/A*                                                     |                                                             |
| 1hz5A                   | <b>1jmlA</b> | 52-55                       | 4                   |                                       |                     | N/A*                                                     |                                                             |
| 1wwwX                   | <b>1wwbX</b> | 299-301                     | 3                   |                                       |                     | N/A*                                                     |                                                             |
| 1orcA                   | <b>5croA</b> | 55-55                       | 1                   |                                       |                     | N/A*                                                     |                                                             |
| 1sncA                   | <b>1sndA</b> | 112-120                     | 9                   |                                       |                     | N/A*                                                     |                                                             |
| 1mupA                   | <b>1obpA</b> | 121-124                     | 4                   |                                       |                     | N/A*                                                     |                                                             |
| 1fynA                   | <b>1aojA</b> | 34-49                       | 16                  |                                       |                     | N/A*                                                     |                                                             |
| 1wwwX                   | <b>1wwaX</b> | 297-299                     | 3                   |                                       |                     | N/A*                                                     |                                                             |
| 1dksA                   | <b>1cksA</b> | 60-65                       | 6                   |                                       |                     | N/A*                                                     |                                                             |
| 1msbA                   | <b>1ixxA</b> | 93-98                       | 6                   |                                       |                     | N/A*                                                     |                                                             |
| 1nloC                   | <b>1aojA</b> | 34-39                       | 6                   |                                       |                     | N/A*                                                     |                                                             |
| 1qmpA                   | <b>1dz3A</b> | 103-109                     | 7                   |                                       |                     | N/A*                                                     |                                                             |
| 1wwwX                   | <b>1wwcA</b> | 317-319                     | 3                   |                                       |                     | N/A*                                                     |                                                             |
| 1k3sA                   | <b>1k3eA</b> | 33-36                       | 4                   |                                       |                     | N/A*                                                     |                                                             |
| 1eydA                   | <b>1sndA</b> | 112-120                     | 9                   |                                       |                     | N/A*                                                     |                                                             |
| 1qd0A                   | <b>1sjvA</b> | 95-100                      | 6                   |                                       |                     | N/A*                                                     |                                                             |
| 1gmfA                   | <b>1hulA</b> | 82-89                       | 8                   |                                       |                     | N/A*                                                     |                                                             |
| 5rsaA                   | <b>1f0vA</b> | 112-115                     | 4                   |                                       |                     | N/A*                                                     |                                                             |
| 5rsaA                   | <b>1js0A</b> | 112-115                     | 4                   |                                       |                     | N/A*                                                     |                                                             |
| 5rsaA                   | <b>1a2wA</b> | 15-22                       | 8                   |                                       |                     | N/A*                                                     |                                                             |
| 1a5pA                   | <b>1a2wA</b> | 15-22                       | 8                   |                                       |                     | N/A*                                                     |                                                             |
| 4gcrA                   | <b>1blbA</b> | 79-87                       | 9                   |                                       |                     | N/A*                                                     |                                                             |
| <b>Unsigned average</b> |              |                             |                     |                                       |                     | <b>2.8</b>                                               | <b>3.4</b>                                                  |

\*Not available because DynDom cannot identify any hinge loop.

<sup>1</sup>See Table 4 for how to calculate these values.
