# Supplementary material for: Detection and Alignment of 3D Domain Swapping Proteins Using Angle-Distance Image-Based Secondary Structural Matching Techniques
Source: PubMed Central journal article supplement (PMC2955075; doi:10.1371/journal.pone.0013361), 2010-10-14
Supplement: pone.0013361.s007.pdf [file pone.0013361.s007.pdf]

**Table S3. Results of inter-dataset training and testing of the proposed method for the identification of DS-related homologs**

| Training set | Testing set | AUC   | MCC   | Sensitivity | Specificity |
|--------------|-------------|-------|-------|-------------|-------------|
| Dataset M    | Dataset L   | 0.958 | 0.901 | 0.896       | 0.989       |
| Dataset L    | Dataset M   | 0.969 | 0.801 | 0.937       | 0.954       |

Only DS-related homologs were used as positive data in this experiment, in which common homologs and non-homologs were both regarded as negative data.
