# Supplementary material for: Detection and Alignment of 3D Domain Swapping Proteins Using Angle-Distance Image-Based Secondary Structural Matching Techniques
Source: PubMed Central journal article supplement (PMC2955075; doi:10.1371/journal.pone.0013361), 2010-10-14
Supplement: pone.0013361.s008.pdf [file pone.0013361.s008.pdf]

# Table S4. Results of the structural alignments and hinge loop determinations for DS<sub>CO</sub> pairs in Datasets L and M

The 1,093 DS<sub>CO</sub> pairs successfully identified by the proposed method are listed here each with detailed information of the ranges of hinge loops determined by Eisenberg's and our methods, several structural similarity measures as well as the DS score defined in this work, and the virtual superimposition computed by our method. Structural superimpositions shown in this table were drawn using Jmol. The cells of determined hinge loops highlighted with yellow or green background colors mean that the calculated ranges for these hinge loops are obviously insufficient or over-extended, respectively. These highlighted parts were judged with manual inspections by the authors and their colleagues. The authors suggest that these parts should be used only for reference at the current stage where there is still no universal rule for verifying the range of a predicted or calculated hinge loop.

The authors would like to thank Chi-Ching Lee, Che-Wei Chang, Zong-Han Tsai and Yi-Chou Lin, the authors' colleagues at National Tsing Hua University, Shih-Chung Yen at National Chiao Tung University and Yu-Jie Lin at National Cheng Kung University, for their effort in preparing this table.

| No. | PDB entry (size) | Hinge loop (size) Eisenberg's algorithm; $\theta_c=20^\circ$ | Hinge loop (size) Eisenberg's algorithm; $\theta_c=30^\circ$ | Hinge loop (size) The proposed method | DS type | DS score | vRMSD | vAli.Ratio       | Identity         | Superimposed structures                                                                                                             |
|-----|------------------|--------------------------------------------------------------|--------------------------------------------------------------|---------------------------------------|---------|----------|-------|------------------|------------------|-------------------------------------------------------------------------------------------------------------------------------------|
| 1   | 1bmL (108)       | 37-44 (8)                                                    | 37-41 (5)                                                    | 37-41 (5)                             | N       | 0.92     | 0.47  | 99.07% (107/108) | 99.07% (107/108) | 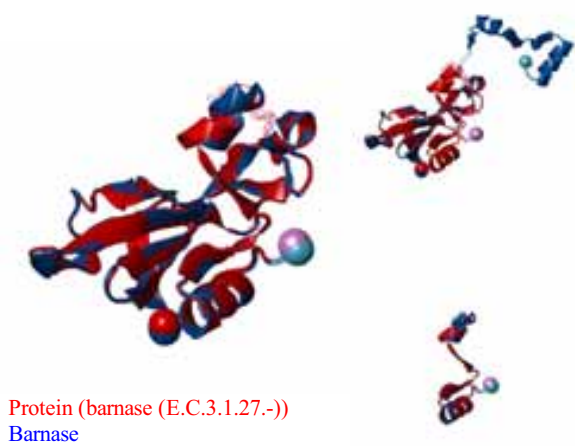<br>Protein (barnase (E.C.3.1.27.-))<br>Barnase |
|     | 1yvsA (108)      | 37-44 (8)                                                    | 37-41 (5)                                                    | 37-41 (5)                             |         |          |       |                  |                  |                                                                                                                                     |
| 2   | 4icbA (76)       | 39-45 (7)                                                    | 39-45 (7)                                                    | 41-45 (5)                             | C       | 0.86     | 0.97  | 97.37% (74/76)   | 96.05% (73/76)   | <br>Calbindin D9K<br>Calbindin D9K             |
|     | 1ht9A (76)       | 39-45 (7)                                                    | 39-45 (7)                                                    | 41-45 (5)                             |         |          |       |                  |                  |                                                                                                                                     |

|   |                |           |           |            |   |      |      |                      |                      |                                                                                                                                                                |
|---|----------------|-----------|-----------|------------|---|------|------|----------------------|----------------------|----------------------------------------------------------------------------------------------------------------------------------------------------------------|
| 3 | 1hngA<br>(175) | 44-50 (7) | 44-46 (3) | 44-46 (3)  | C | 0.49 | 1.01 | 100.00%<br>(96/96)   | 97.92%<br>(94/96)    | 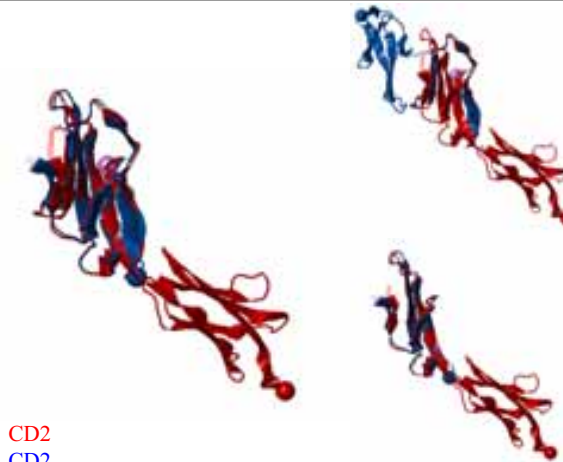<br>CD2<br>CD2                                                               |
|   | 1cdcA<br>(96)  | 44-50 (7) | 44-46 (3) | 44-46 (3)  |   |      |      |                      |                      |                                                                                                                                                                |
| 4 | 1orcA<br>(64)  | 54-60 (7) | 55-60 (6) | 55-56C (2) | C | 0.76 | 1.24 | 96.72%<br>(59/61)    | 93.44%<br>(57/61)    | <br>CRO repressor insertion mutant<br>K56-[dgevK]<br>CRO repressor protein |
|   | 5croA<br>(61)  | 54-60 (7) | 55-60 (6) | 55-56C (2) |   |      |      |                      |                      |                                                                                                                                                                |
| 5 | 2ezmA<br>(101) | 49-55 (7) | 49-54 (6) | 49-54 (6)  | C | 0.93 | 0.82 | 100.00%<br>(101/101) | 100.00%<br>(101/101) | <br>Cyanovirin-N<br>Protein (cyanovirin-N)                                |
|   | 3ezmA<br>(101) | 49-55 (7) | 49-54 (6) | 49-54 (6)  |   |      |      |                      |                      |                                                                                                                                                                |

|   |                |              |             |             |   |      |      |                     |                     |                                                                                                                                  |
|---|----------------|--------------|-------------|-------------|---|------|------|---------------------|---------------------|----------------------------------------------------------------------------------------------------------------------------------|
| 6 | 1mdtA<br>(523) | 377-386 (10) | 379-386 (8) | 379-386 (8) | C | 0.91 | 0.84 | 98.85%<br>(517/523) | 98.85%<br>(517/523) |  <p>Diphtheria toxin<br/>Diphtheria toxin</p>  |
|   | 1ddtA<br>(523) | 377-386 (10) | 379-386 (8) | 379-386 (8) |   |      |      |                     |                     |                                                                                                                                  |
| 7 | 1qlxA<br>(104) | 188-198 (11) | 188-191 (4) | 189-197 (9) | C | 0.69 | 1.56 | 95.19%<br>(99/104)  | 92.31%<br>(96/104)  |  <p>Prion protein<br/>Major prion protein</p> |
|   | 1i4mA<br>(108) | 188-198 (11) | 188-194 (7) | 189-197 (9) |   |      |      |                     |                     |                                                                                                                                  |
| 8 | 1hz5A<br>(72)  | 51-56 (6)    | 52-56 (5)   | 52-56 (5)   | C | 0.74 | 1.58 | 97.22%<br>(70/72)   | 88.89%<br>(64/72)   |  <p>Protein L<br/>Protein L</p>             |
|   | 1jmlA<br>(72)  | 51-56 (6)    | 52-56 (5)   | 52-56 (5)   |   |      |      |                     |                     |                                                                                                                                  |

|    |                |             |             |             |   |      |      |                      |                      |                                                                                       |
|----|----------------|-------------|-------------|-------------|---|------|------|----------------------|----------------------|---------------------------------------------------------------------------------------|
| 9  | 5rsaA<br>(124) | 15-22 (8)   | 16-22 (7)   | 18-22 (5)   | N | 0.97 | 0.54 | 100.00%<br>(124/124) | 100.00%<br>(124/124) |     |
|    | 1a2wA<br>(124) | 15-22 (8)   | 16-22 (7)   | 18-22 (5)   |   |      |      |                      |                      |                                                                                       |
| 10 | 5rsaA<br>(124) | 111-113 (3) | 112-113 (2) | 112-113 (2) | C | 0.98 | 0.43 | 100.00%<br>(124/124) | 100.00%<br>(124/124) |    |
|    | 1f0vA<br>(124) | 111-113 (3) | 112-113 (2) | 112-113 (2) |   |      |      |                      |                      |                                                                                       |
| 11 | 5rsaA<br>(124) | 112-115 (4) | 112-113 (2) | 112-113 (2) | C | 0.78 | 0.57 | 100.00%<br>(124/124) | 100.00%<br>(124/124) |  |
|    | ljs0A<br>(124) | 112-115 (4) | 112-113 (2) | 112-113 (2) |   |      |      |                      |                      |                                                                                       |

Ribonuclease A  
Ribonuclease A

Ribonuclease A  
Ribonuclease A

Ribonuclease A  
Ribonuclease A

|    |                |              |             |             |   |      |      |                      |                     |                                                                                                                                                         |
|----|----------------|--------------|-------------|-------------|---|------|------|----------------------|---------------------|---------------------------------------------------------------------------------------------------------------------------------------------------------|
| 12 | 5rsaA<br>(124) | 15-22 (8)    | 15-22 (8)   | 15-22 (8)   | N | 0.57 | 0.91 | 100.00%<br>(124/124) | 81.45%<br>(101/124) |  <p>Ribonuclease A<br/>Bovine seminal ribonuclease</p>               |
|    | lbrA<br>(124)  | 15-22 (8)    | 15-22 (8)   | 15-22 (8)   |   |      |      |                      |                     |                                                                                                                                                         |
| 13 | 1qmpA<br>(126) | 100-112 (13) | 102-108 (7) | 107-111 (5) | C | 0.79 | 1.33 | 98.37%<br>(121/123)  | 89.43%<br>(110/123) |  <p>SPO0A<br/>Stage 0 sporulation protein a</p>                     |
|    | 1dz3A<br>(123) | 100-112 (13) | 101-108 (8) | 107-111 (5) |   |      |      |                      |                     |                                                                                                                                                         |
| 14 | 1sncA<br>(135) | 112-120 (9)  | 112-120 (9) | 112-120 (9) | C | 0.87 | 0.93 | 100.00%<br>(129/129) | 99.22%<br>(128/129) |  <p>Thermonuclease precursor<br/>Staphylococcal nuclease dimer</p> |
|    | 1sndA<br>(129) | 112-120 (9)  | 112-120 (9) | 112-120 (9) |   |      |      |                      |                     |                                                                                                                                                         |

|    |                |              |             |             |   |      |      |                      |                      |                                                                                                                                                                        |
|----|----------------|--------------|-------------|-------------|---|------|------|----------------------|----------------------|------------------------------------------------------------------------------------------------------------------------------------------------------------------------|
| 15 | 1wwwX<br>(101) | 296-299 (4)  | 296-299 (4) | 296-298 (3) | N | 0.92 | 0.68 | 100.00%<br>(101/101) | 100.00%<br>(101/101) |  <p>Protein (TRKA receptor)<br/>Protein (nerve growth factor receptor TRKA)</p>     |
|    | 1wwaX<br>(105) | 296-299 (4)  | 296-299 (4) | 296-298 (3) |   |      |      |                      |                      |                                                                                                                                                                        |
| 16 | 1wwwX<br>(101) | 287-299 (13) | 294-299 (6) | 295-298 (4) | N | 0.83 | 1.10 | 98.02%<br>(99/101)   | 45.54%<br>(46/101)   |  <p>Protein (TRKA receptor)<br/>Protein (brain derived neurotrophic factor Re)</p> |
|    | 1wwbX<br>(103) | 288-301 (14) | 296-301 (6) | 295-298 (4) |   |      |      |                      |                      |                                                                                                                                                                        |
| 17 | 1wwwX<br>(101) | 295-300 (6)  | 295-300 (6) | 296-297 (2) | N | 0.62 | 1.13 | 96.04%<br>(97/101)   | 41.58%<br>(42/101)   |  <p>Protein (TRKA receptor)<br/>Protein (NT-3 growth factor receptor TRKC)</p>    |
|    | 1wwcA<br>(105) | 315-320 (6)  | 315-320 (6) | 296-297 (2) |   |      |      |                      |                      |                                                                                                                                                                        |

|    |                |            |            |           |   |      |      |                     |                    |                                                                                                                                                                                       |
|----|----------------|------------|------------|-----------|---|------|------|---------------------|--------------------|---------------------------------------------------------------------------------------------------------------------------------------------------------------------------------------|
| 18 | 1dksA<br>(76)  | 60-65 (6)  | 60-65 (6)  | 60-65 (6) | C | 0.78 | 1.37 | 98.65%<br>(73/74)   | 83.78%<br>(62/74)  | 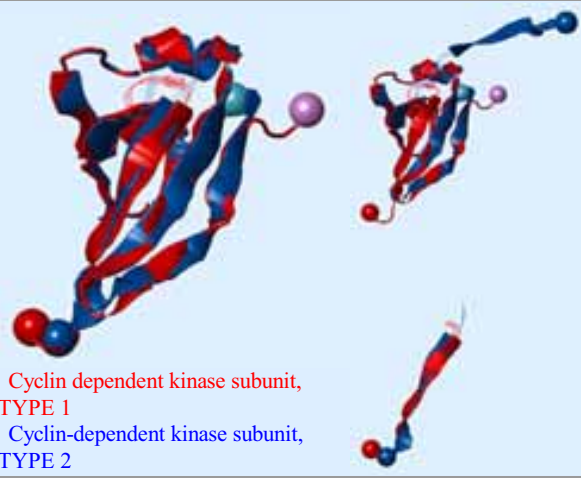 <p>Cyclin dependent kinase subunit,<br/>TYPE 1<br/>Cyclin-dependent kinase subunit,<br/>TYPE 2</p> |
|    | 1cksA<br>(74)  | 60-65 (6)  | 60-65 (6)  | 60-65 (6) |   |      |      |                     |                    |                                                                                                                                                                                       |
| 19 | 4gcrA<br>(174) | 44-96 (53) | 82-92 (11) | 86-87 (2) | N | 0.77 | 1.30 | 98.28%<br>(171/174) | 36.78%<br>(64/174) |  <p>Gamma-B crystallin<br/>Beta B2-crystallin</p>                                                 |
|    | 1blbA<br>(185) | 44-96 (53) | 82-92 (11) | 86-87 (2) |   |      |      |                     |                    |                                                                                                                                                                                       |
| 20 | 1cewl<br>(108) | 53-60 (8)  | 54-57 (4)  | 55-57 (3) | N | 0.55 | 1.45 | 96.30%<br>(104/108) | 39.81%<br>(43/108) |  <p>Cystatin<br/>Cystatin C</p>                                                                  |
|    | 1g96A<br>(111) | 55-62 (8)  | 56-59 (4)  | 55-57 (3) |   |      |      |                     |                    |                                                                                                                                                                                       |

|    |                |                               |                               |                              |   |      |      |                     |                    |                                                                                                                                                                   |
|----|----------------|-------------------------------|-------------------------------|------------------------------|---|------|------|---------------------|--------------------|-------------------------------------------------------------------------------------------------------------------------------------------------------------------|
| 21 | 2gmfA<br>(121) | 85-101 (17)                   | 87-101 (15)                   | 87-97 (11)                   | C | 0.43 | 2.26 | 87.04%<br>(94/108)  | 10.19%<br>(11/108) |  <p>Granulocyte-macrophage colony-stimulating FAC<br/>Interleukin-5</p>         |
|    | 1hulA<br>(108) | 80-91 (12)                    | 82-91 (10)                    | 87-97 (11)                   |   |      |      |                     |                    |                                                                                                                                                                   |
| 22 | 1msbA<br>(115) | 150-170 (21),<br>173-194 (22) | 158-168 (11),<br>182-194 (13) | 161-168 (8),<br>182-193 (12) | M | 0.57 | 1.64 | 91.30%<br>(105/115) | 13.04%<br>(15/115) |  <p>Mannose-binding protein-a<br/>Coagulation factors IX/X-binding protein</p> |
|    | 1ixxA<br>(129) | 54-83 (30),<br>86-101 (16)    | 69-80 (12),<br>95-101 (7)     | 161-168 (8),<br>182-193 (12) |   |      |      |                     |                    |                                                                                                                                                                   |
| 23 | 1mupA<br>(157) | 125-134 (10)                  | 126-130 (5)                   | 126-130 (5)                  | C | 0.60 | 1.92 | 92.36%<br>(145/157) | 24.84%<br>(39/157) |  <p>Major urinary protein<br/>Odorant-binding protein</p>                    |
|    | 1obpA<br>(158) | 120-128 (9)                   | 121-124 (4)                   | 126-130 (5)                  |   |      |      |                     |                    |                                                                                                                                                                   |



|    |                |             |             |             |   |      |      |                     |                    |                                                                                                                                                                  |
|----|----------------|-------------|-------------|-------------|---|------|------|---------------------|--------------------|------------------------------------------------------------------------------------------------------------------------------------------------------------------|
| 24 | 1f0vA<br>(124) | 15-23 (9)   | 15-23 (9)   | 17-23 (7)   | N | 0.69 | 1.14 | 89.52%<br>(111/124) | 60.48%<br>(75/124) | 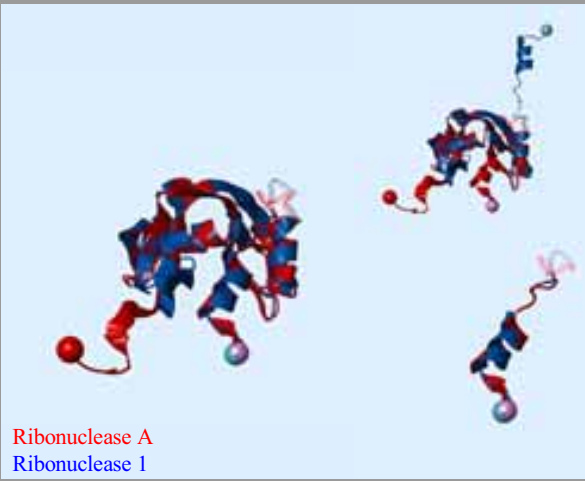<br>Ribonuclease A<br>Ribonuclease 1                                           |
|    | 1h8xA<br>(125) | 115-123 (9) | 115-123 (9) | 17-23 (7)   |   |      |      |                     |                    |                                                                                                                                                                  |
| 25 | 1f0vA<br>(124) | 111-113 (3) | 111-113 (3) | 112-113 (2) | C | 0.59 | 1.20 | 83.06%<br>(103/124) | 57.26%<br>(71/124) | <br>Ribonuclease A<br>Ribonuclease 1                                         |
|    | 1h8xA<br>(125) | 211-213 (3) | 211-213 (3) | 112-113 (2) |   |      |      |                     |                    |                                                                                                                                                                  |
| 26 | 1griA<br>(211) | 121-126 (6) | 121-124 (4) | 121-123 (3) | C | 0.28 | 1.35 | 100.00%<br>(95/95)  | 100.00%<br>(95/95) | <br>Growth factor bound protein 2<br>Growth factor receptor-bound protein 2 |
|    | 1fyrA<br>(95)  | 121-126 (6) | 121-124 (4) | 121-123 (3) |   |      |      |                     |                    |                                                                                                                                                                  |

|    |                |              |             |             |   |      |      |                     |                    |                                                                                                                                    |
|----|----------------|--------------|-------------|-------------|---|------|------|---------------------|--------------------|------------------------------------------------------------------------------------------------------------------------------------|
| 27 | 1fynA<br>(62)  | 112-132 (21) | 112-119 (8) | 112-118 (7) | C | 0.69 | 1.10 | 90.00%<br>(54/60)   | 26.67%<br>(16/60)  |  <p>Phosphotransferase FYN<br/>EPSS</p>          |
|    | 1aojA<br>(60)  | 34-52 (19)   | 34-40 (7)   | 112-118 (7) |   |      |      |                     |                    |                                                                                                                                    |
| 28 | 1k3sA<br>(109) | 12-40 (29)   | 27-32 (6)   | 27-28 (2)   | N | 0.56 | 1.75 | 98.17%<br>(107/109) | 12.84%<br>(14/109) |  <p>SigE<br/>CesT</p>                          |
|    | 1k3eA<br>(141) | 16-49 (34)   | 34-40 (7)   | 27-28 (2)   |   |      |      |                     |                    |                                                                                                                                    |
| 29 | 1cunA<br>(213) | 182-186 (5)  | 182-186 (5) | 182-186 (5) | C | 0.33 | 2.01 | 98.13%<br>(105/107) | 15.89%<br>(17/107) |  <p>Protein (alpha spectrin)<br/>Spectrin</p> |
|    | 2spcA<br>(107) | 72-73 (2)    | 72-73 (2)   | 182-186 (5) |   |      |      |                     |                    |                                                                                                                                    |

|    |                |              |             |            |   |      |      |                     |                   |                                                                                                                                                                |
|----|----------------|--------------|-------------|------------|---|------|------|---------------------|-------------------|----------------------------------------------------------------------------------------------------------------------------------------------------------------|
| 30 | 1wu3I<br>(161) | 96-114 (19)  | 96-103 (8)  | 96-104 (9) | C | 0.38 | 2.80 | 86.75%<br>(131/151) | 9.93%<br>(15/151) | 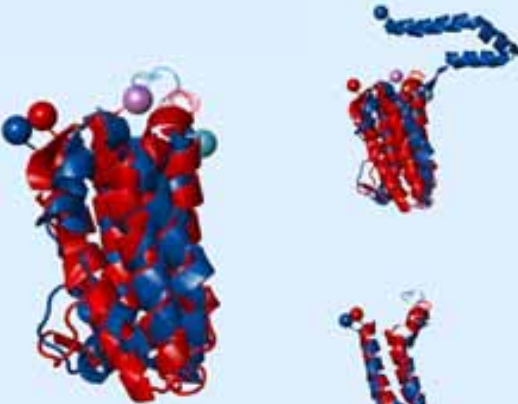<br>Interferon beta<br>Interleukin-10                                        |
|    | 1ilkA<br>(151) | 107-118 (12) | 107-112 (6) | 96-104 (9) |   |      |      |                     |                   |                                                                                                                                                                |
| 31 | 1vjqa<br>(73)  | 57-72 (16)   | 58-72 (15)  | 67-68 (2)  | C | 0.42 | 2.55 | 98.63%<br>(72/73)   | 9.59%<br>(7/73)   | <br>Designed protein<br>Mesoderm development candidate 2                    |
|    | 2i9sA<br>(97)  | 78-96 (19)   | 79-96 (18)  | 67-68 (2)  |   |      |      |                     |                   |                                                                                                                                                                |
| 32 | 2d8dA<br>(80)  | 19-20 (2)    | 19-20 (2)   | 19-20 (2)  | N | 0.40 | 2.28 | 90.00%<br>(72/80)   | 11.25%<br>(9/80)  | <br>Phospho-2-dehydro-3-deoxyheptonate<br>aldolase/c<br>Chorismate mutase |
|    | 2gtvX<br>(104) | 19-32 (14)   | 19-32 (14)  | 19-20 (2)  |   |      |      |                     |                   |                                                                                                                                                                |

|    |                |            |            |           |   |      |      |                    |                   |                                                                                                                                                                                                     |
|----|----------------|------------|------------|-----------|---|------|------|--------------------|-------------------|-----------------------------------------------------------------------------------------------------------------------------------------------------------------------------------------------------|
| 33 | 2d8dA<br>(80)  | 22-24 (3)  | 22-24 (3)  | 23-24 (2) | N | 0.49 | 1.73 | 93.75%<br>(75/80)  | 11.25%<br>(9/80)  | 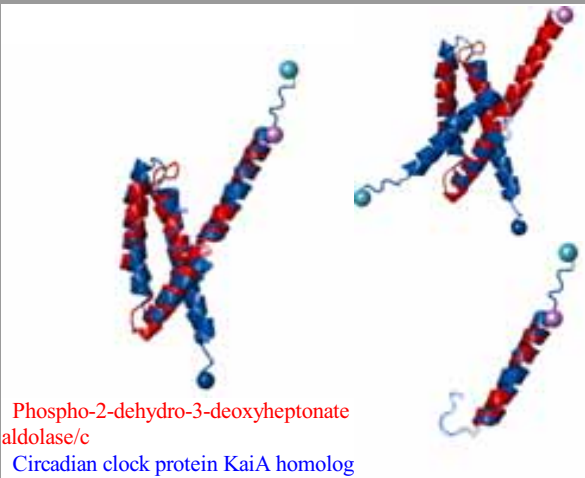 <p>Phospho-2-dehydro-3-deoxyheptonate<br/>aldolase/c<br/>Circadian clock protein KaiA homolog</p>                |
|    | 1q6aA<br>(107) | 27-36 (10) | 27-36 (10) | 23-24 (2) |   |      |      |                    |                   |                                                                                                                                                                                                     |
| 34 | 2c5jA<br>(82)  | 61-72 (12) | 62-65 (4)  | 63-64 (2) | C | 0.78 | 0.89 | 98.78%<br>(81/82)  | 62.20%<br>(51/82) |  <p>T-snare affecting a LATE golgi<br/>compartment PR<br/>T-snare affecting a LATE golgi<br/>compartment PR</p> |
|    | 2c5iT<br>(94)  | 61-77 (17) | 62-70 (9)  | 63-64 (2) |   |      |      |                    |                   |                                                                                                                                                                                                     |
| 35 | 2c5jA<br>(82)  | 63-64 (2)  | 63-64 (2)  | 63-64 (2) | C | 0.58 | 1.74 | 100.00%<br>(82/82) | 15.85%<br>(13/82) |  <p>T-snare affecting a LATE golgi<br/>compartment PR<br/>Syntaxin 6</p>                                       |
|    | 1lvfA<br>(106) | 72-81 (10) | 72-81 (10) | 63-64 (2) |   |      |      |                    |                   |                                                                                                                                                                                                     |

|    |                |              |              |           |   |      |      |                   |                   |                                                                                                                                                                                         |
|----|----------------|--------------|--------------|-----------|---|------|------|-------------------|-------------------|-----------------------------------------------------------------------------------------------------------------------------------------------------------------------------------------|
| 36 | 2c5jA<br>(82)  | 70-72 (3)    | 70-72 (3)    | 70-72 (3) | C | 0.41 | 1.75 | 89.02%<br>(73/82) | 7.32%<br>(6/82)   | 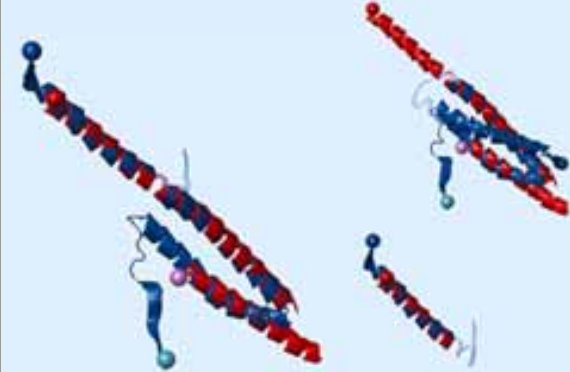 <p>T-snare affecting a LATE golgi compartment PR<br/>Mite allergen Blo t 5</p>                       |
|    | 2jmhA<br>(117) | 78-91 (14)   | 78-91 (14)   | 70-72 (3) |   |      |      |                   |                   |                                                                                                                                                                                         |
| 37 | 2c5jA<br>(82)  | 67-71 (5)    | 67-69 (3)    | 68-69 (2) | C | 0.48 | 1.70 | 92.68%<br>(76/82) | 4.88%<br>(4/82)   |  <p>T-snare affecting a LATE golgi compartment PR<br/>BAG-family molecular chaperone regulator-1</p> |
|    | 1hx1B<br>(112) | 222-236 (15) | 222-234 (13) | 68-69 (2) |   |      |      |                   |                   |                                                                                                                                                                                         |
| 38 | 1wz3A<br>(84)  | 49-65 (17)   | 49-62 (14)   | 59-61 (3) | C | 0.53 | 1.60 | 97.62%<br>(82/84) | 17.86%<br>(15/84) |  <p>Autophagy 12b<br/>Gabarap</p>                                                                  |
|    | 1gnuA<br>(117) | 69-86 (18)   | 69-83 (15)   | 59-61 (3) |   |      |      |                   |                   |                                                                                                                                                                                         |

|    |                |            |            |            |   |      |      |                   |                   |                                                                                                                                                                  |
|----|----------------|------------|------------|------------|---|------|------|-------------------|-------------------|------------------------------------------------------------------------------------------------------------------------------------------------------------------|
| 39 | 1wz3A<br>(84)  | 50-63 (14) | 50-62 (13) | 59-62 (4)  | C | 0.53 | 1.46 | 95.24%<br>(80/84) | 17.86%<br>(15/84) |  <p>Autophagy 12b<br/>Golgi-associated atpase enhancer OF<br/>16 KD</p>        |
|    | leo6A<br>(116) | 70-84 (15) | 70-83 (14) | 59-62 (4)  |   |      |      |                   |                   |                                                                                                                                                                  |
| 40 | 1wz3A<br>(84)  | 49-61 (13) | 51-61 (11) | 59-61 (3)  | C | 0.56 | 1.35 | 94.05%<br>(79/84) | 21.43%<br>(18/84) |  <p>Autophagy 12b<br/>Gamma-aminobutyric acid receptor-<br/>associated p</p> |
|    | 2r2qA<br>(110) | 68-82 (15) | 70-82 (13) | 59-61 (3)  |   |      |      |                   |                   |                                                                                                                                                                  |
| 41 | 1wz3A<br>(84)  | 49-67 (19) | 52-67 (16) | 57-67 (11) | C | 0.45 | 2.31 | 89.29%<br>(75/84) | 10.71%<br>(9/84)  |  <p>Autophagy 12b<br/>Hypothetical protein ZK652.3</p>                      |
|    | 117yA<br>(94)  | 50-70 (21) | 53-70 (18) | 57-67 (11) |   |      |      |                   |                   |                                                                                                                                                                  |

|    |                |            |            |           |   |      |      |                   |                 |                                                                                                                                                                |
|----|----------------|------------|------------|-----------|---|------|------|-------------------|-----------------|----------------------------------------------------------------------------------------------------------------------------------------------------------------|
| 42 | 1wz3A<br>(84)  | 51-64 (14) | 52-64 (13) | 58-62 (5) | C | 0.25 | 2.33 | 89.29%<br>(75/84) | 5.95%<br>(5/84) |  <p>Autophagy 12b<br/>Elongin B</p>                                          |
|    | 1lm8B<br>(106) | 37-51 (15) | 38-51 (14) | 58-62 (5) |   |      |      |                   |                 |                                                                                                                                                                |
| 43 | 1wz3A<br>(84)  | 51-65 (15) | 51-65 (15) | 59-61 (3) | C | 0.54 | 2.03 | 90.12%<br>(73/81) | 6.17%<br>(5/81) |  <p>Autophagy 12b<br/>Small ubiquitin-related modifier 3<br/>precursor</p> |
|    | 2io1B<br>(81)  | 52-67 (16) | 52-67 (16) | 59-61 (3) |   |      |      |                   |                 |                                                                                                                                                                |
| 44 | 1wz3A<br>(84)  | 48-69 (22) | 48-62 (15) | 59-62 (4) | C | 0.49 | 2.24 | 88.89%<br>(72/81) | 6.17%<br>(5/81) |  <p>Autophagy 12b<br/>Ubiquitin-like protein 4A</p>                       |
|    | 2dziA<br>(81)  | 41-62 (22) | 41-55 (15) | 59-62 (4) |   |      |      |                   |                 |                                                                                                                                                                |

|    |                |            |            |           |   |      |      |                   |                 |                                                                                                                                      |
|----|----------------|------------|------------|-----------|---|------|------|-------------------|-----------------|--------------------------------------------------------------------------------------------------------------------------------------|
| 45 | 1wz3A<br>(84)  | 54-65 (12) | 54-65 (12) | 59-61 (3) | C | 0.41 | 2.20 | 86.90%<br>(73/84) | 1.19%<br>(1/84) |  <p>Autophagy 12b<br/>NEDD8 ultimate buster-1</p> |
|    | 1wjuA<br>(100) | 60-70 (11) | 60-70 (11) | 59-61 (3) |   |      |      |                   |                 |                                                                                                                                      |
| 46 | 1wz3A<br>(84)  | 52-70 (19) | 52-61 (10) | 58-61 (4) | C | 0.32 | 2.15 | 84.52%<br>(71/84) | 9.52%<br>(8/84) |  <p>Autophagy 12b<br/>Ubiquitin 3</p>             |
|    | 1wx7A<br>(106) | 53-72 (20) | 53-63 (11) | 58-61 (4) |   |      |      |                   |                 |                                                                                                                                      |
| 47 | 1wz3A<br>(84)  | 49-64 (16) | 56-64 (9)  | 59-61 (3) | C | 0.41 | 1.93 | 83.33%<br>(70/84) | 4.76%<br>(4/84) |  <p>Autophagy 12b<br/>Ubiquitin family</p>      |
|    | 1se9A<br>(101) | 42-65 (24) | 58-65 (8)  | 59-61 (3) |   |      |      |                   |                 |                                                                                                                                      |



|    |                |             |             |           |   |      |      |                   |                  |                                                                                                                                            |
|----|----------------|-------------|-------------|-----------|---|------|------|-------------------|------------------|--------------------------------------------------------------------------------------------------------------------------------------------|
| 48 | 1wz3A<br>(84)  | 49-70 (22)  | 49-70 (22)  | 58-66 (9) | C | 0.32 | 2.41 | 88.10%<br>(74/84) | 9.52%<br>(8/84)  |  <p>Autophagy 12b<br/>KIAA0794 protein</p>               |
|    | 1wj4A<br>(124) | 77-103 (27) | 77-103 (27) | 58-66 (9) |   |      |      |                   |                  |                                                                                                                                            |
| 49 | 1wz3A<br>(84)  | 51-66 (16)  | 56-62 (7)   | 59-62 (4) | C | 0.44 | 2.34 | 85.71%<br>(72/84) | 5.95%<br>(5/84)  |  <p>Autophagy 12b<br/>Ubiquitin 3</p>                   |
|    | 1yqbA<br>(88)  | 56-72 (17)  | 63-68 (6)   | 59-62 (4) |   |      |      |                   |                  |                                                                                                                                            |
| 50 | 1wz3A<br>(84)  | 50-62 (13)  | 57-62 (6)   | 59-62 (4) | C | 0.55 | 1.94 | 91.14%<br>(72/79) | 10.13%<br>(8/79) |  <p>Autophagy 12b<br/>Ubiquitin-LIKE protein SMT3</p> |
|    | 1euvB<br>(79)  | 57-70 (14)  | 66-70 (5)   | 59-62 (4) |   |      |      |                   |                  |                                                                                                                                            |

|    |               |            |            |           |   |      |      |                   |                   |                                                                                                                                                               |
|----|---------------|------------|------------|-----------|---|------|------|-------------------|-------------------|---------------------------------------------------------------------------------------------------------------------------------------------------------------|
| 51 | 1wz3A<br>(84) | 43-61 (19) | 50-61 (12) | 59-61 (3) | C | 0.45 | 2.31 | 85.71%<br>(72/84) | 3.57%<br>(3/84)   | 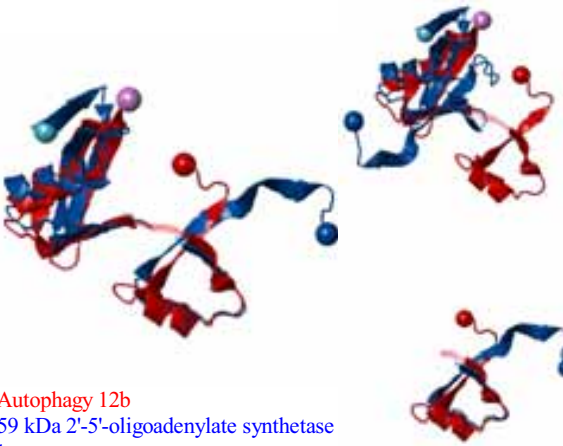 <p>Autophagy 12b<br/>59 kDa 2'-5'-oligoadenylate synthetase<br/>like p</p> |
|    | 1wh3A<br>(87) | 35-54 (20) | 42-54 (13) | 59-61 (3) |   |      |      |                   |                   |                                                                                                                                                               |
| 52 | 1wz3A<br>(84) | 48-68 (21) | 49-61 (13) | 58-61 (4) | C | 0.49 | 2.41 | 95.89%<br>(70/73) | 10.96%<br>(8/73)  |  <p>Autophagy 12b<br/>Protein YNR032c-a</p>                               |
|    | 1m94A<br>(73) | 34-55 (22) | 35-48 (14) | 58-61 (4) |   |      |      |                   |                   |                                                                                                                                                               |
| 53 | 1wz3A<br>(84) | 47-69 (23) | 57-65 (9)  | 57-61 (5) | C | 0.44 | 2.30 | 85.71%<br>(72/84) | 11.90%<br>(10/84) |  <p>Autophagy 12b<br/>Ubiquitin-fold modifier 1</p>                      |
|    | 1wxsA<br>(88) | 39-62 (24) | 50-58 (9)  | 57-61 (5) |   |      |      |                   |                   |                                                                                                                                                               |

|    |                |              |              |           |   |      |      |                   |                 |                                                                                                                                        |
|----|----------------|--------------|--------------|-----------|---|------|------|-------------------|-----------------|----------------------------------------------------------------------------------------------------------------------------------------|
| 54 | 1wz3A<br>(84)  | 50-65 (16)   | 50-65 (16)   | 59-61 (3) | C | 0.43 | 2.34 | 85.19%<br>(69/81) | 9.88%<br>(8/81) |  <p>Autophagy 12b<br/>Ubiquitin</p>                 |
|    | 2gbjA<br>(81)  | 43-59 (17)   | 43-59 (17)   | 59-61 (3) |   |      |      |                   |                 |                                                                                                                                        |
| 55 | 1wz3A<br>(84)  | 52-69 (18)   | 56-65 (10)   | 59-63 (5) | C | 0.36 | 2.09 | 84.52%<br>(71/84) | 5.95%<br>(5/84) |  <p>Autophagy 12b<br/>Splicing factor, putative</p> |
|    | 1we6A<br>(111) | 68-86 (19)   | 74-82 (9)    | 59-63 (5) |   |      |      |                   |                 |                                                                                                                                        |
| 56 | 1wz3A<br>(84)  | 47-93 (47)   | 48-93 (46)   | 59-62 (4) | C | 0.35 | 2.31 | 85.71%<br>(72/84) | 9.52%<br>(8/84) |  <p>Autophagy 12b<br/>Ubiquitin</p>               |
|    | 2ojrA<br>(110) | 132-175 (44) | 134-175 (42) | 59-62 (4) |   |      |      |                   |                 |                                                                                                                                        |

|    |               |            |            |           |   |      |      |                   |                 |                                                                                                                                           |
|----|---------------|------------|------------|-----------|---|------|------|-------------------|-----------------|-------------------------------------------------------------------------------------------------------------------------------------------|
| 57 | 1wz3A<br>(84) | 49-69 (21) | 57-68 (12) | 58-65 (8) | C | 0.52 | 2.08 | 90.48%<br>(76/84) | 8.33%<br>(7/84) |  <p>Autophagy 12b<br/>Tubulin folding cofactor B</p>    |
|    | 1t0yA<br>(90) | 39-67 (29) | 49-66 (18) | 58-65 (8) |   |      |      |                   |                 |                                                                                                                                           |
| 58 | 1wz3A<br>(84) | 50-65 (16) | 50-65 (16) | 59-61 (3) | C | 0.46 | 2.25 | 85.37%<br>(70/82) | 8.54%<br>(7/82) |  <p>Autophagy 12b<br/>Ubiquitin</p>                    |
|    | 2gbkA<br>(82) | 42-58 (17) | 42-58 (17) | 59-61 (3) |   |      |      |                   |                 |                                                                                                                                           |
| 59 | 1wz3A<br>(84) | 49-69 (21) | 49-66 (18) | 58-62 (5) | C | 0.50 | 2.19 | 91.03%<br>(71/78) | 6.41%<br>(5/78) |  <p>Autophagy 12b<br/>Nfatc2-interacting protein</p> |
|    | 2jxxA<br>(78) | 60-81 (22) | 60-78 (19) | 58-62 (5) |   |      |      |                   |                 |                                                                                                                                           |

|    |                |            |            |           |   |      |      |                   |                 |                                                                                                                                                  |
|----|----------------|------------|------------|-----------|---|------|------|-------------------|-----------------|--------------------------------------------------------------------------------------------------------------------------------------------------|
| 60 | 1wz3A<br>(84)  | 49-69 (21) | 57-62 (6)  | 59-61 (3) | C | 0.52 | 2.22 | 97.18%<br>(69/71) | 8.45%<br>(6/71) | 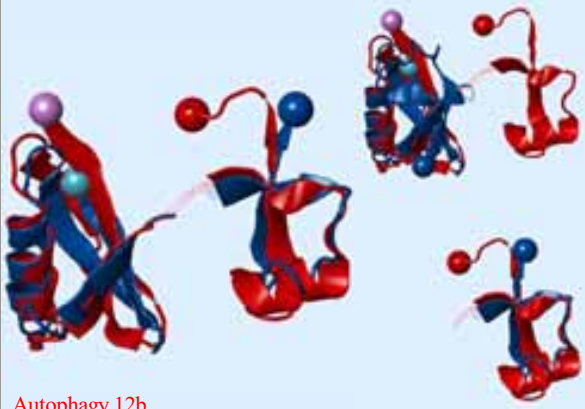 <p>Autophagy 12b<br/>Ubiquitin</p>                           |
|    | IsifA<br>(71)  | 34-55 (22) | 44-48 (5)  | 59-61 (3) |   |      |      |                   |                 |                                                                                                                                                  |
| 61 | 1wz3A<br>(84)  | 47-69 (23) | 51-62 (12) | 59-62 (4) | C | 0.48 | 2.55 | 96.05%<br>(73/76) | 7.89%<br>(6/76) |  <p>Autophagy 12b<br/>Protein (ubiquitin CORE mutant 1D7)</p> |
|    | 1ud7A<br>(76)  | 32-55 (24) | 36-48 (13) | 59-62 (4) |   |      |      |                   |                 |                                                                                                                                                  |
| 62 | 1wz3A<br>(84)  | 45-65 (21) | 47-65 (19) | 58-64 (7) | C | 0.38 | 2.19 | 83.33%<br>(70/84) | 2.38%<br>(2/84) |  <p>Autophagy 12b<br/>FAS-associated factor 1</p>           |
|    | 2dzmA<br>(100) | 38-60 (23) | 40-60 (21) | 58-64 (7) |   |      |      |                   |                 |                                                                                                                                                  |

|    |                |            |            |           |   |      |      |                   |                 |                                                                                                                                                          |
|----|----------------|------------|------------|-----------|---|------|------|-------------------|-----------------|----------------------------------------------------------------------------------------------------------------------------------------------------------|
| 63 | 1wz3A<br>(84)  | 48-93 (46) | 49-61 (13) | 59-61 (3) | C | 0.41 | 2.51 | 84.52%<br>(71/84) | 8.33%<br>(7/84) |  <p>Autophagy 12b<br/>HLA-B associated transcript-3 isoform<br/>b</p> |
|    | 1wx9A<br>(86)  | 40-86 (47) | 41-54 (14) | 59-61 (3) |   |      |      |                   |                 |                                                                                                                                                          |
| 64 | 1wz3A<br>(84)  | 42-73 (32) | 60-71 (12) | 60-63 (4) | C | 0.42 | 2.19 | 88.10%<br>(74/84) | 7.14%<br>(6/84) |  <p>Autophagy 12b<br/>KIAA0049 protein</p>                           |
|    | 1wj6A<br>(101) | 42-77 (36) | 60-75 (16) | 60-63 (4) |   |      |      |                   |                 |                                                                                                                                                          |
| 65 | 1wz3A<br>(84)  | 47-89 (43) | 51-61 (11) | 58-61 (4) | C | 0.53 | 2.21 | 97.26%<br>(71/73) | 8.22%<br>(6/73) |  <p>Autophagy 12b<br/>Ubiquitin-like 5</p>                          |
|    | 1p0rA<br>(73)  | 33-72 (40) | 37-48 (12) | 58-61 (4) |   |      |      |                   |                 |                                                                                                                                                          |

|    |                |             |            |            |   |      |      |                   |                   |                                                                                                                                                            |
|----|----------------|-------------|------------|------------|---|------|------|-------------------|-------------------|------------------------------------------------------------------------------------------------------------------------------------------------------------|
| 66 | 1wz3A<br>(84)  | 51-69 (19)  | 56-69 (14) | 59-62 (4)  | C | 0.51 | 2.33 | 94.81%<br>(73/77) | 7.79%<br>(6/77)   |  <p>Autophagy 12b<br/>Ubiquitin-like containing PHD and RING finger</p>  |
|    | 2fazA<br>(77)  | 38-57 (20)  | 45-57 (13) | 59-62 (4)  |   |      |      |                   |                   |                                                                                                                                                            |
| 67 | 1wz3A<br>(84)  | 48-69 (22)  | 60-69 (10) | 60-62 (3)  | C | 0.35 | 2.89 | 90.48%<br>(76/84) | 11.90%<br>(10/84) |  <p>Autophagy 12b<br/>Dual specificity mitogen-activated protein ki</p> |
|    | 2nptA<br>(102) | 51-77 (27)  | 64-77 (14) | 60-62 (3)  |   |      |      |                   |                   |                                                                                                                                                            |
| 68 | 1wz3A<br>(84)  | 46-90 (45)  | 48-69 (22) | 51-64 (14) | C | 0.35 | 2.67 | 83.33%<br>(70/84) | 10.71%<br>(9/84)  |  <p>Autophagy 12b<br/>Protein (RA-domain OF RAL guanine dissociat</p> |
|    | 1raxA<br>(93)  | 62-114 (53) | 66-94 (29) | 51-64 (14) |   |      |      |                   |                   |                                                                                                                                                            |

|    |                |            |            |           |   |      |      |                   |                 |                                                                                                                                                               |
|----|----------------|------------|------------|-----------|---|------|------|-------------------|-----------------|---------------------------------------------------------------------------------------------------------------------------------------------------------------|
| 69 | 1wz3A<br>(84)  | 49-72 (24) | 49-69 (21) | 60-63 (4) | C | 0.37 | 2.44 | 86.90%<br>(73/84) | 4.76%<br>(4/84) |  <p>Autophagy 12b<br/>Mitogen-activated protein kinase<br/>kinase kinas</p> |
|    | 2cu1A<br>(103) | 41-66 (26) | 41-63 (23) | 60-63 (4) |   |      |      |                   |                 |                                                                                                                                                               |
| 70 | 1wz3A<br>(84)  | 49-71 (23) | 49-71 (23) | 59-62 (4) | C | 0.49 | 2.22 | 89.87%<br>(71/79) | 5.06%<br>(4/79) |  <p>Autophagy 12b<br/>Ubiquitin-like protein SMT3A</p>                    |
|    | 1u4aA<br>(79)  | 50-71 (22) | 50-71 (22) | 59-62 (4) |   |      |      |                   |                 |                                                                                                                                                               |
| 71 | 1wz3A<br>(84)  | 51-62 (13) | 51-62 (12) | 59-62 (4) | C | 0.47 | 2.38 | 92.11%<br>(70/76) | 9.21%<br>(7/76) |  <p>Autophagy 12b<br/>Protein (1D8 ubiquitin)</p>                        |
|    | 1c3tA<br>(76)  | 36-48 (13) | 36-48 (13) | 59-62 (4) |   |      |      |                   |                 |                                                                                                                                                               |



|    |                |            |            |            |   |      |      |                   |                 |                                                                                                                                                                    |
|----|----------------|------------|------------|------------|---|------|------|-------------------|-----------------|--------------------------------------------------------------------------------------------------------------------------------------------------------------------|
| 72 | 1wz3A<br>(84)  | 48-65 (18) | 50-61 (12) | 58-61 (4)  | C | 0.48 | 2.40 | 93.42%<br>(71/76) | 9.21%<br>(7/76) |  <p>Autophagy 12b<br/>Ubiquitin</p>                                              |
|    | 2jwzA<br>(76)  | 33-51 (19) | 35-47 (13) | 58-61 (4)  |   |      |      |                   |                 |                                                                                                                                                                    |
| 73 | 1wz3A<br>(84)  | 48-69 (22) | 48-69 (22) | 59-69 (11) | C | 0.30 | 2.93 | 90.48%<br>(76/84) | 8.33%<br>(7/84) |  <p>Autophagy 12b<br/>Phospholipase C, epsilon 1</p>                            |
|    | 2byfA<br>(116) | 42-87 (46) | 42-87 (46) | 59-69 (11) |   |      |      |                   |                 |                                                                                                                                                                    |
| 74 | 1wz3A<br>(84)  | 51-69 (19) | 57-69 (13) | 59-63 (5)  | C | 0.41 | 2.63 | 89.29%<br>(75/84) | 8.33%<br>(7/84) |  <p>Autophagy 12b<br/>Mitogen-activated protein kinase<br/>kinase kinases</p> |
|    | 2jrhA<br>(93)  | 37-58 (22) | 43-58 (16) | 59-63 (5)  |   |      |      |                   |                 |                                                                                                                                                                    |

|    |               |            |            |            |   |      |      |                   |                  |                                                                                                                                                           |
|----|---------------|------------|------------|------------|---|------|------|-------------------|------------------|-----------------------------------------------------------------------------------------------------------------------------------------------------------|
| 75 | 1wz3A<br>(84) | 48-59 (12) | 48-59 (12) | 48-59 (12) | C | 0.33 | 2.54 | 76.54%<br>(62/81) | 11.11%<br>(9/81) |  <p>Autophagy 12b<br/>YUKD protein</p>                                  |
|    | 2bpsA<br>(81) | 38-56 (19) | 38-56 (19) | 48-59 (12) |   |      |      |                   |                  |                                                                                                                                                           |
| 76 | 1wz3A<br>(84) | 48-69 (22) | 48-64 (17) | 58-64 (7)  | C | 0.43 | 2.62 | 88.10%<br>(74/84) | 8.33%<br>(7/84)  |  <p>Autophagy 12b<br/>Ralgds</p>                                      |
|    | 1lfdA<br>(87) | 54-82 (29) | 54-77 (24) | 58-64 (7)  |   |      |      |                   |                  |                                                                                                                                                           |
| 77 | 1wz3A<br>(84) | 48-69 (22) | 59-69 (11) | 59-63 (5)  | C | 0.47 | 2.51 | 90.24%<br>(74/82) | 10.98%<br>(9/82) |  <p>Autophagy 12b<br/>Partitioning defective-6 homolog<br/>alpha</p> |
|    | 1wmhB<br>(82) | 51-76 (26) | 62-76 (15) | 59-63 (5)  |   |      |      |                   |                  |                                                                                                                                                           |

|    |               |            |            |           |   |      |      |                   |                  |                                                                                                                                                |
|----|---------------|------------|------------|-----------|---|------|------|-------------------|------------------|------------------------------------------------------------------------------------------------------------------------------------------------|
| 78 | 1wz3A<br>(84) | 50-68 (19) | 50-68 (19) | 58-66 (9) | C | 0.43 | 2.55 | 90.79%<br>(69/76) | 11.84%<br>(9/76) | 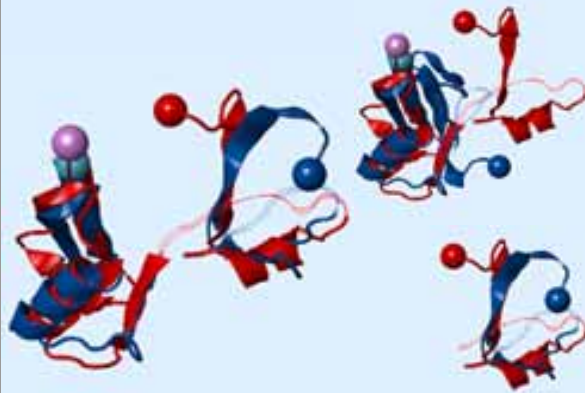 <p>Autophagy 12b<br/>TUG long isoform</p>                   |
|    | 2al3A<br>(76) | 44-63 (20) | 44-63 (20) | 58-66 (9) |   |      |      |                   |                  |                                                                                                                                                |
| 79 | 1wz3A<br>(84) | 34-93 (60) | 50-66 (17) | 58-63 (6) | C | 0.39 | 2.43 | 85.71%<br>(72/84) | 9.52%<br>(8/84)  |  <p>Autophagy 12b<br/>Cytoskeleton-associated protein 1</p> |
|    | 1v6eA<br>(95) | 27-95 (69) | 43-67 (25) | 58-63 (6) |   |      |      |                   |                  |                                                                                                                                                |
| 80 | 1wz3A<br>(84) | 48-65 (18) | 48-59 (12) | 58-59 (2) | C | 0.37 | 2.71 | 86.90%<br>(73/84) | 9.52%<br>(8/84)  |  <p>Autophagy 12b<br/>Protein C12orf2</p>                 |
|    | 2cs4A<br>(95) | 41-61 (21) | 41-55 (15) | 58-59 (2) |   |      |      |                   |                  |                                                                                                                                                |

|    |                |             |             |             |   |      |      |                    |                   |                                                                                                                                                      |
|----|----------------|-------------|-------------|-------------|---|------|------|--------------------|-------------------|------------------------------------------------------------------------------------------------------------------------------------------------------|
| 81 | 1wz3A<br>(84)  | 46-69 (24)  | 48-69 (22)  | 59-62 (4)   | C | 0.42 | 2.54 | 86.90%<br>(73/84)  | 8.33%<br>(7/84)   | 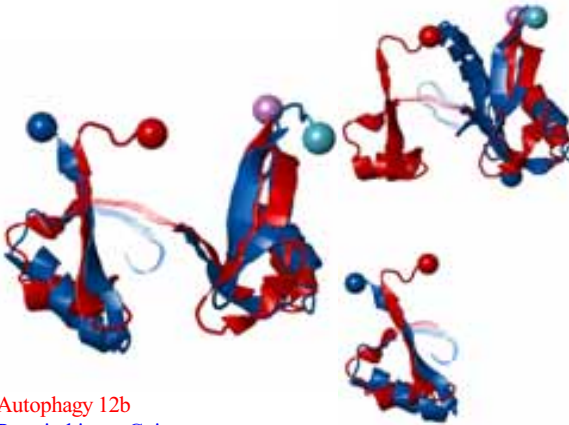 <p>Autophagy 12b<br/>Protein kinase C, iota type</p>             |
|    | 1vd2A<br>(89)  | 46-76 (31)  | 50-76 (27)  | 59-62 (4)   |   |      |      |                    |                   |                                                                                                                                                      |
| 82 | 1zvnA<br>(99)  | 1-23 (23)   | 1-7 (7)     | 7-7 (1)     | N | 0.40 | 1.64 | 95.96%<br>(95/99)  | 28.28%<br>(28/99) |  <p>MN-cadherin<br/>Epithelial-cadherin</p>                       |
|    | 2omwB<br>(105) | -1-23 (25)  | -1-7 (9)    | 7-7 (1)     |   |      |      |                    |                   |                                                                                                                                                      |
| 83 | 2oyaA<br>(102) | 426-431 (6) | 426-431 (6) | 429-430 (2) | N | 0.67 | 0.45 | 100.00%<br>(98/98) | 97.96%<br>(96/98) |  <p>Macrophage receptor marco<br/>Macrophage receptor marco</p> |
|    | 2oy3A<br>(98)  | 426-431 (6) | 426-431 (6) | 429-430 (2) |   |      |      |                    |                   |                                                                                                                                                      |

|    |                |             |             |             |   |      |      |                     |                    |                                                                                                                                                     |
|----|----------------|-------------|-------------|-------------|---|------|------|---------------------|--------------------|-----------------------------------------------------------------------------------------------------------------------------------------------------|
| 84 | 2oyaA<br>(102) | 428-431 (4) | 428-431 (4) | 428-430 (3) | N | 0.50 | 1.18 | 99.02%<br>(101/102) | 47.06%<br>(48/102) |  <p>Macrophage receptor marco<br/>MAC-2 binding protein</p>       |
|    | 1by2A<br>(112) | 11-16 (6)   | 11-16 (6)   | 428-430 (3) |   |      |      |                     |                    |                                                                                                                                                     |
| 85 | 1v9yA<br>(103) | 28-34 (7)   | 28-29 (2)   | 29-29 (1)   | N | 0.26 | 2.15 | 96.12%<br>(99/103)  | 15.53%<br>(16/103) |  <p>Heme pas sensor protein<br/>Vivid PAS protein VVD</p>        |
|    | 2pd7A<br>(149) | 56-74 (19)  | 56-69 (14)  | 29-29 (1)   |   |      |      |                     |                    |                                                                                                                                                     |
| 86 | 1v9yA<br>(103) | 25-27 (3)   | 25-27 (3)   | 26-26 (1)   | N | 0.54 | 1.93 | 96.12%<br>(99/103)  | 14.56%<br>(15/103) |  <p>Heme pas sensor protein<br/>Photoactive yellow protein</p> |
|    | 1f98A<br>(125) | 14-24 (11)  | 14-24 (11)  | 26-26 (1)   |   |      |      |                     |                    |                                                                                                                                                     |

|    |                |              |              |           |   |      |      |                     |                    |                                                                                                                                                                         |
|----|----------------|--------------|--------------|-----------|---|------|------|---------------------|--------------------|-------------------------------------------------------------------------------------------------------------------------------------------------------------------------|
| 87 | 1v9yA<br>(103) | 25-27 (3)    | 25-26 (2)    | 25-26 (2) | N | 0.50 | 2.12 | 93.20%<br>(96/103)  | 16.50%<br>(17/103) | 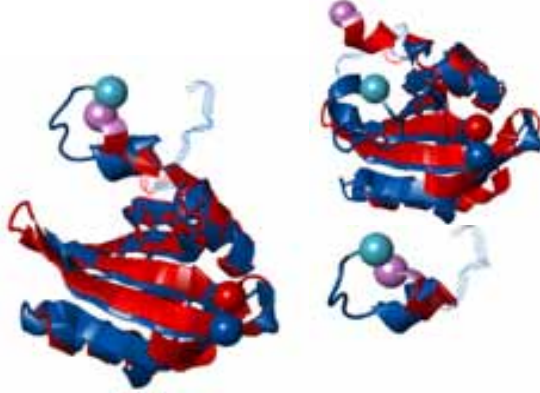 <p>Heme pas sensor protein<br/>Photoactive yellow protein</p>                        |
|    | 1d7eA<br>(119) | 15-24 (10)   | 15-23 (9)    | 25-26 (2) |   |      |      |                     |                    |                                                                                                                                                                         |
| 88 | 1lgqA<br>(112) | 85-94 (10)   | 85-94 (10)   | 85-88 (4) | C | 0.57 | 1.75 | 89.29%<br>(100/112) | 24.11%<br>(27/112) |  <p>Cell cycle checkpoint protein CHFR<br/>Serine/threonine-protein kinase CHK2</p> |
|    | 1gxcA<br>(116) | 171-180 (10) | 171-180 (10) | 85-88 (4) |   |      |      |                     |                    |                                                                                                                                                                         |
| 89 | 1lgqA<br>(112) | 64-103 (40)  | 77-101 (25)  | 85-88 (4) | C | 0.41 | 2.14 | 92.86%<br>(104/112) | 16.96%<br>(19/112) |  <p>Cell cycle checkpoint protein CHFR<br/>Protein (protein kinase SPK1)</p>       |
|    | 1dmzA<br>(158) | 626-678 (53) | 652-676 (25) | 85-88 (4) |   |      |      |                     |                    |                                                                                                                                                                         |

|    |                |             |             |           |   |      |      |                     |                    |                                                                                                                                                                |
|----|----------------|-------------|-------------|-----------|---|------|------|---------------------|--------------------|----------------------------------------------------------------------------------------------------------------------------------------------------------------|
| 90 | 1lgqA<br>(112) | 84-102 (19) | 85-97 (13)  | 85-88 (4) | C | 0.46 | 1.89 | 91.07%<br>(102/112) | 24.11%<br>(27/112) |  <p>Cell cycle checkpoint protein CHFR<br/>Ubiquitin ligase protein RNF8</p> |
|    | 2cswA<br>(145) | 87-105 (19) | 88-100 (13) | 85-88 (4) |   |      |      |                     |                    |                                                                                                                                                                |
| 91 | 1lgqA<br>(112) | 64-100 (37) | 85-95 (11)  | 85-87 (3) | C | 0.57 | 1.98 | 96.00%<br>(96/100)  | 28.00%<br>(28/100) |  <p>Cell cycle checkpoint protein CHFR<br/>Antigen Ki-67</p>               |
|    | 1r21A<br>(100) | 52-85 (34)  | 72-80 (9)   | 85-87 (3) |   |      |      |                     |                    |                                                                                                                                                                |
| 92 | 1lgqA<br>(112) | 74-116 (43) | 85-101 (17) | 85-88 (4) | C | 0.53 | 1.70 | 85.71%<br>(96/112)  | 21.43%<br>(24/112) |  <p>Cell cycle checkpoint protein CHFR<br/>Expressed protein</p>          |
|    | luhtA<br>(118) | 69-105 (37) | 81-97 (17)  | 85-88 (4) |   |      |      |                     |                    |                                                                                                                                                                |

|    |                |              |              |           |   |      |      |                     |                    |                                                                                                                                                                                 |
|----|----------------|--------------|--------------|-----------|---|------|------|---------------------|--------------------|---------------------------------------------------------------------------------------------------------------------------------------------------------------------------------|
| 93 | 1lgqA<br>(112) | 75-123 (49)  | 76-87 (12)   | 84-87 (4) | C | 0.44 | 2.27 | 90.18%<br>(101/112) | 17.86%<br>(20/112) |  <p>Cell cycle checkpoint protein CHFR<br/>Nuclear inhibitor of protein<br/>phosphatase 1</p> |
|    | 2jpeA<br>(132) | 86-129 (44)  | 87-99 (13)   | 84-87 (4) |   |      |      |                     |                    |                                                                                                                                                                                 |
| 94 | 1lgqA<br>(112) | 63-95 (33)   | 84-95 (12)   | 85-88 (4) | C | 0.52 | 1.97 | 89.29%<br>(100/112) | 14.29%<br>(16/112) |  <p>Cell cycle checkpoint protein CHFR<br/>Afadin</p>                                       |
|    | 1wlnA<br>(120) | 64-93 (30)   | 84-93 (10)   | 85-88 (4) |   |      |      |                     |                    |                                                                                                                                                                                 |
| 95 | 1lgqA<br>(112) | 77-97 (21)   | 85-97 (13)   | 85-87 (3) | C | 0.56 | 1.75 | 90.29%<br>(93/103)  | 17.48%<br>(18/103) |  <p>Cell cycle checkpoint protein CHFR<br/>Kinesin-like protein KIF1C</p>                  |
|    | 2g11A<br>(103) | 563-581 (19) | 571-581 (11) | 85-87 (3) |   |      |      |                     |                    |                                                                                                                                                                                 |



|    |                |              |            |           |   |      |      |                     |                    |                                                                                                                                                                                       |
|----|----------------|--------------|------------|-----------|---|------|------|---------------------|--------------------|---------------------------------------------------------------------------------------------------------------------------------------------------------------------------------------|
| 96 | 1lgqA<br>(112) | 83-95 (13)   | 85-95 (11) | 85-87 (3) | C | 0.49 | 2.02 | 91.96%<br>(103/112) | 24.11%<br>(27/112) |  <p>Cell cycle checkpoint protein CHFR<br/>E3 ubiquitin-protein ligase RNF8</p>                     |
|    | 2pieA<br>(132) | 86-98 (13)   | 88-98 (11) | 85-87 (3) |   |      |      |                     |                    |                                                                                                                                                                                       |
| 97 | 1lgqA<br>(112) | 15-123 (109) | 85-99 (15) | 85-88 (4) | C | 0.46 | 1.94 | 87.50%<br>(98/112)  | 18.75%<br>(21/112) |  <p>Cell cycle checkpoint protein CHFR<br/>Kinesin-like protein KIF1B</p>                          |
|    | 2eh0A<br>(130) | 7-114 (108)  | 85-97 (13) | 85-88 (4) |   |      |      |                     |                    |                                                                                                                                                                                       |
| 98 | 1lgqA<br>(112) | 84-98 (15)   | 84-98 (15) | 84-87 (4) | C | 0.45 | 2.48 | 89.52%<br>(94/105)  | 16.19%<br>(17/105) |  <p>Cell cycle checkpoint protein CHFR<br/>5' polynucleotide kinase-3'<br/>phosphatase FHA d</p> |
|    | 1yj5C<br>(105) | 74-88 (15)   | 74-88 (15) | 84-87 (4) |   |      |      |                     |                    |                                                                                                                                                                                       |

|     |                |              |              |           |   |      |      |                     |                    |                                                                                                                                                                                        |
|-----|----------------|--------------|--------------|-----------|---|------|------|---------------------|--------------------|----------------------------------------------------------------------------------------------------------------------------------------------------------------------------------------|
| 99  | 1lgqA<br>(112) | 15-99 (85)   | 78-98 (21)   | 84-87 (4) | C | 0.40 | 2.29 | 82.14%<br>(92/112)  | 15.18%<br>(17/112) | 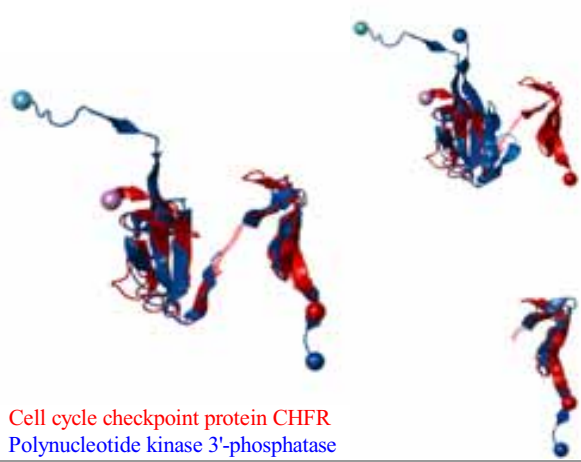 <p>Cell cycle checkpoint protein CHFR<br/>Polynucleotide kinase 3'-phosphatase</p>                  |
|     | 1ujxA<br>(119) | 15-96 (82)   | 75-95 (21)   | 84-87 (4) |   |      |      |                     |                    |                                                                                                                                                                                        |
| 100 | 1lgqA<br>(112) | 76-116 (41)  | 85-97 (13)   | 85-89 (5) | C | 0.36 | 2.41 | 92.86%<br>(104/112) | 24.11%<br>(27/112) |  <p>Cell cycle checkpoint protein CHFR<br/>Protein kinase SPK1</p>                                 |
|     | 1g3gA<br>(164) | 103-141 (39) | 112-124 (13) | 85-89 (5) |   |      |      |                     |                    |                                                                                                                                                                                        |
| 101 | 1lgqA<br>(112) | 80-98 (19)   | 85-96 (12)   | 84-88 (5) | C | 0.46 | 2.37 | 91.00%<br>(91/100)  | 18.00%<br>(18/100) |  <p>Cell cycle checkpoint protein CHFR<br/>Bifunctional polynucleotide<br/>phosphatase/kinase</p> |
|     | 2brfA<br>(100) | 70-88 (19)   | 75-86 (12)   | 84-88 (5) |   |      |      |                     |                    |                                                                                                                                                                                        |

|     |                |                          |                          |                          |   |      |      |                     |                    |                                                                                                                                                      |
|-----|----------------|--------------------------|--------------------------|--------------------------|---|------|------|---------------------|--------------------|------------------------------------------------------------------------------------------------------------------------------------------------------|
| 102 | 2pfsA<br>(125) | 41-63 (23),<br>68-69 (2) | 42-62 (21),<br>68-69 (2) | 42-57 (16),<br>68-69 (2) | M | 0.41 | 1.71 | 95.20%<br>(119/125) | 27.20%<br>(34/125) | 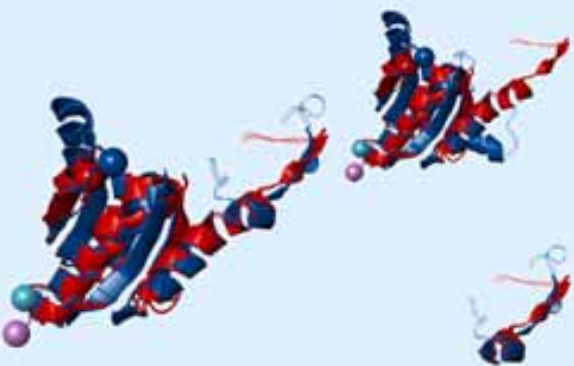<br>Universal stress protein<br>Universal stress protein a        |
|     | 1jmvA<br>(140) | 39-52 (14),<br>57-64 (8) | 40-51 (12),<br>57-64 (8) | 42-57 (16),<br>68-69 (2) |   |      |      |                     |                    |                                                                                                                                                      |
| 103 | 2qntA<br>(125) | 47-75 (29)               | 47-75 (29)               | 47-70 (24)               | C | 0.41 | 2.24 | 81.60%<br>(102/125) | 12.00%<br>(15/125) | <br>Uncharacterized protein Atu1872<br>Uncharacterized protein    |
|     | 2r6uA<br>(130) | 65-76 (12)               | 65-76 (12)               | 47-70 (24)               |   |      |      |                     |                    |                                                                                                                                                      |
| 104 | 2qntA<br>(125) | 22-72 (51)               | 38-72 (35)               | 63-71 (9)                | N | 0.26 | 2.23 | 87.20%<br>(109/125) | 11.20%<br>(14/125) | <br>Uncharacterized protein Atu1872<br>Lactoylglutathione lyase |
|     | 2qh0A<br>(129) | 24-78 (55)               | 46-78 (33)               | 63-71 (9)                |   |      |      |                     |                    |                                                                                                                                                      |

|     |                |             |             |             |   |      |      |                     |                    |                                                                                                                                                                        |
|-----|----------------|-------------|-------------|-------------|---|------|------|---------------------|--------------------|------------------------------------------------------------------------------------------------------------------------------------------------------------------------|
| 105 | 2rbbA<br>(129) | 61-106 (46) | 76-105 (30) | 85-104 (20) | N | 0.45 | 2.08 | 85.27%<br>(110/129) | 14.73%<br>(19/129) |  <p>Glyoxalase/bleomycin resistance protein/dioxy<br/>Uncharacterized protein</p>    |
|     | 2r6uA<br>(130) | 30-73 (44)  | 44-72 (29)  | 85-104 (20) |   |      |      |                     |                    |                                                                                                                                                                        |
| 106 | 2rbbA<br>(129) | 55-115 (61) | 72-104 (33) | 85-104 (20) | C | 0.51 | 2.05 | 86.82%<br>(112/129) | 10.08%<br>(13/129) |  <p>Glyoxalase/bleomycin resistance protein/dioxy<br/>Lactoylglutathione lyase</p> |
|     | 2qh0A<br>(129) | 24-84 (61)  | 45-76 (32)  | 85-104 (20) |   |      |      |                     |                    |                                                                                                                                                                        |
| 107 | 2p7oA<br>(127) | 30-69 (40)  | 59-69 (11)  | 59-67 (9)   | C | 0.42 | 2.07 | 79.53%<br>(101/127) | 13.39%<br>(17/127) |  <p>Glyoxalase family protein<br/>Uncharacterized protein</p>                     |
|     | 2r6uA<br>(130) | 30-72 (43)  | 65-72 (8)   | 59-67 (9)   |   |      |      |                     |                    |                                                                                                                                                                        |

|     |                |              |              |             |   |      |      |                     |                     |                                                                                                                                                  |
|-----|----------------|--------------|--------------|-------------|---|------|------|---------------------|---------------------|--------------------------------------------------------------------------------------------------------------------------------------------------|
| 108 | 2p7oA<br>(127) | 24-70 (47)   | 55-68 (14)   | 58-68 (11)  | N | 0.39 | 2.06 | 83.46%<br>(106/127) | 11.81%<br>(15/127)  |  <p>Glyoxalase family protein<br/>Lactoylglutathione lyase</p> |
|     | 2qh0A<br>(129) | 24-78 (55)   | 54-76 (23)   | 58-68 (11)  |   |      |      |                     |                     |                                                                                                                                                  |
| 109 | 2f5gA<br>(130) | 109-116 (8)  | 109-116 (8)  | 109-116 (8) | C | 0.75 | 1.46 | 96.15%<br>(125/130) | 34.62%<br>(45/130)  |  <p>Transposase, putative<br/>Transposase, putative</p>      |
|     | 2fyxA<br>(130) | 111-115 (5)  | 111-115 (5)  | 109-116 (8) |   |      |      |                     |                     |                                                                                                                                                  |
| 110 | 2axwA<br>(134) | 110-132 (23) | 110-132 (23) | 117-122 (6) | C | 0.51 | 2.54 | 96.27%<br>(129/134) | 79.85%<br>(107/134) |  <p>DraD invasin<br/>Protein afaD</p>                       |
|     | 2fvnA<br>(142) | 111-138 (28) | 111-138 (28) | 117-122 (6) |   |      |      |                     |                     |                                                                                                                                                  |

|     |                |            |            |            |   |      |      |                     |                    |                                                                                                                                                                           |
|-----|----------------|------------|------------|------------|---|------|------|---------------------|--------------------|---------------------------------------------------------------------------------------------------------------------------------------------------------------------------|
| 111 | 2pa7A<br>(135) | 12-32 (21) | 15-32 (18) | 30-32 (3)  | N | 0.30 | 2.26 | 83.70%<br>(113/135) | 11.11%<br>(15/135) | 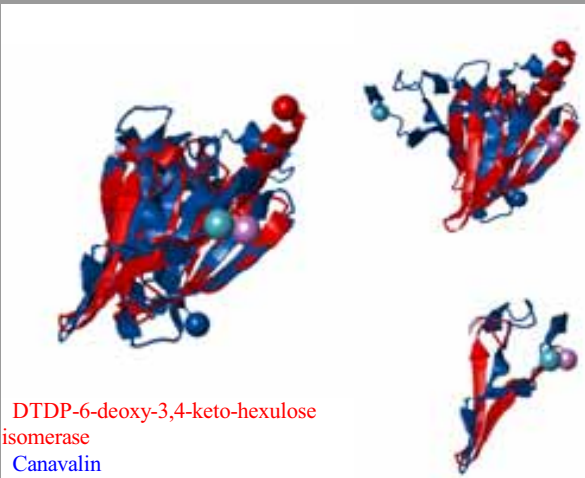 <p>DTDP-6-deoxy-3,4-keto-hexulose<br/>isomerase<br/>Canavalin</p>                      |
|     | 1cauA<br>(181) | 59-86 (28) | 64-86 (23) | 30-32 (3)  |   |      |      |                     |                    |                                                                                                                                                                           |
| 112 | 2pa7A<br>(135) | 2-57 (56)  | 2-48 (47)  | 22-32 (11) | N | 0.40 | 2.17 | 79.26%<br>(107/135) | 8.89%<br>(12/135)  |  <p>DTDP-6-deoxy-3,4-keto-hexulose<br/>isomerase<br/>Hypothetical protein Atu3615</p> |
|     | 1znpA<br>(140) | 4-64 (61)  | 4-55 (52)  | 22-32 (11) |   |      |      |                     |                    |                                                                                                                                                                           |
| 113 | 2pa7A<br>(135) | 3-32 (30)  | 20-32 (13) | 30-32 (3)  | N | 0.38 | 2.39 | 88.15%<br>(119/135) | 11.85%<br>(16/135) |  <p>DTDP-6-deoxy-3,4-keto-hexulose<br/>isomerase<br/>Auxin binding protein 1</p>     |
|     | 1lr5A<br>(160) | 8-41 (34)  | 29-41 (13) | 30-32 (3)  |   |      |      |                     |                    |                                                                                                                                                                           |

|     |                |              |              |             |   |      |      |                     |                    |                                                                                                                                                                                          |
|-----|----------------|--------------|--------------|-------------|---|------|------|---------------------|--------------------|------------------------------------------------------------------------------------------------------------------------------------------------------------------------------------------|
| 114 | 1s60A<br>(152) | 130-144 (15) | 135-138 (4)  | 137-137 (1) | C | 0.49 | 2.15 | 91.45%<br>(139/152) | 10.53%<br>(16/152) | 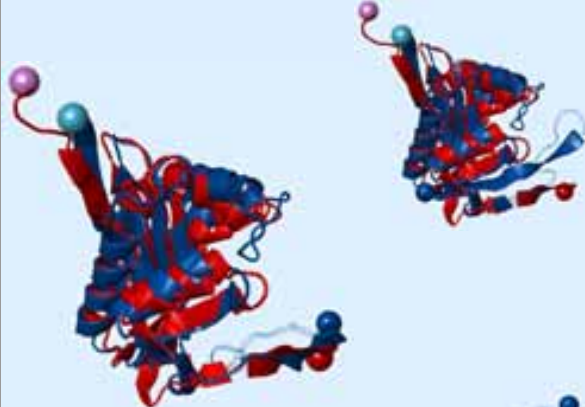 <p>Aminoglycoside 6'-N-acetyltransferase<br/>Acetyltransferase, GNAT family</p>                       |
|     | 2i79A<br>(171) | 142-166 (25) | 147-160 (14) | 137-137 (1) |   |      |      |                     |                    |                                                                                                                                                                                          |
| 115 | 1s60A<br>(152) | 129-139 (11) | 131-139 (9)  | 138-138 (1) | C | 0.50 | 2.37 | 91.45%<br>(139/152) | 8.55%<br>(13/152)  |  <p>Aminoglycoside 6'-N-acetyltransferase<br/>Hypothetical protein PH1933</p>                         |
|     | 1wwzA<br>(157) | 138-152 (15) | 139-152 (14) | 138-138 (1) |   |      |      |                     |                    |                                                                                                                                                                                          |
| 116 | 1s60A<br>(152) | 137-144 (8)  | 137-144 (8)  | 137-138 (2) | C | 0.46 | 1.97 | 86.75%<br>(131/151) | 14.57%<br>(22/151) |  <p>Aminoglycoside 6'-N-acetyltransferase<br/>Modification OF 30S ribosomal<br/>subunit protein</p> |
|     | 2cnmA<br>(151) | 125-144 (20) | 125-144 (20) | 137-138 (2) |   |      |      |                     |                    |                                                                                                                                                                                          |

|     |                |              |              |             |   |      |      |                     |                    |                                                                                                                                                                       |
|-----|----------------|--------------|--------------|-------------|---|------|------|---------------------|--------------------|-----------------------------------------------------------------------------------------------------------------------------------------------------------------------|
| 117 | 1s60A<br>(152) | 127-144 (18) | 139-144 (6)  | 139-139 (1) | C | 0.55 | 1.87 | 93.42%<br>(142/152) | 17.11%<br>(26/152) | 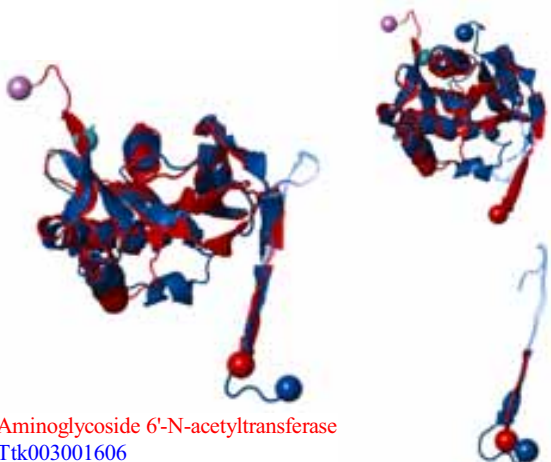 <p>Aminoglycoside 6'-N-acetyltransferase<br/>Ttk003001606</p>                      |
|     | 1wk4A<br>(174) | 140-171 (32) | 152-171 (20) | 139-139 (1) |   |      |      |                     |                    |                                                                                                                                                                       |
| 118 | 1s60A<br>(152) | 136-144 (9)  | 136-140 (5)  | 138-138 (1) | C | 0.50 | 1.96 | 89.47%<br>(136/152) | 15.13%<br>(23/152) |  <p>Aminoglycoside 6'-N-acetyltransferase<br/>Acetyltransferase</p>               |
|     | 1gheA<br>(170) | 150-172 (23) | 150-168 (19) | 138-138 (1) |   |      |      |                     |                    |                                                                                                                                                                       |
| 119 | 1s60A<br>(152) | 128-144 (17) | 139-140 (2)  | 139-139 (1) | C | 0.40 | 2.27 | 88.16%<br>(134/152) | 13.16%<br>(20/152) |  <p>Aminoglycoside 6'-N-acetyltransferase<br/>Acetyltransferase, GNAT family</p> |
|     | 1u6mA<br>(189) | 165-185 (21) | 176-181 (6)  | 139-139 (1) |   |      |      |                     |                    |                                                                                                                                                                       |



|     |                |              |              |             |   |      |      |                     |                    |                                                                                                                                                                                       |
|-----|----------------|--------------|--------------|-------------|---|------|------|---------------------|--------------------|---------------------------------------------------------------------------------------------------------------------------------------------------------------------------------------|
| 120 | 1s60A<br>(152) | 135-144 (10) | 137-143 (7)  | 139-139 (1) | C | 0.52 | 2.18 | 90.79%<br>(138/152) | 15.13%<br>(23/152) | 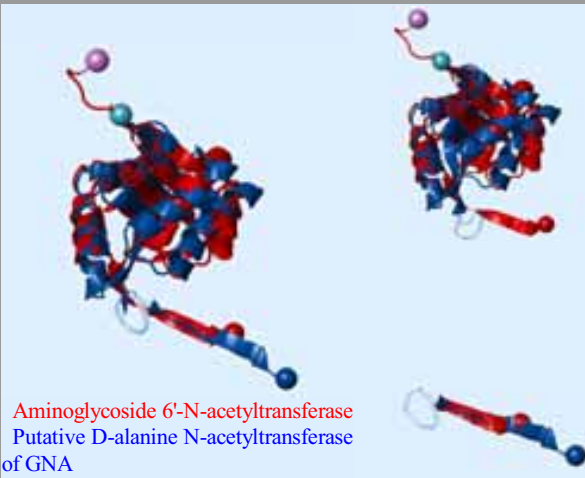 <p>Aminoglycoside 6'-N-acetyltransferase<br/>Putative D-alanine N-acetyltransferase<br/>of GNA</p> |
|     | 2r7hA<br>(157) | 155-171 (17) | 157-170 (14) | 139-139 (1) |   |      |      |                     |                    |                                                                                                                                                                                       |
| 121 | 1s60A<br>(152) | 129-141 (13) | 136-141 (6)  | 138-138 (1) | C | 0.52 | 2.04 | 90.13%<br>(137/152) | 17.11%<br>(26/152) |  <p>Aminoglycoside 6'-N-acetyltransferase<br/>Phosphinothricin acetyltransferase</p>              |
|     | 1yr0A<br>(163) | 137-161 (25) | 144-161 (18) | 138-138 (1) |   |      |      |                     |                    |                                                                                                                                                                                       |
| 122 | 1s60A<br>(152) | 129-144 (16) | 131-139 (9)  | 138-138 (1) | C | 0.45 | 2.25 | 84.87%<br>(129/152) | 13.16%<br>(20/152) |  <p>Aminoglycoside 6'-N-acetyltransferase<br/>Acetyltransferase</p>                              |
|     | 2fiaA<br>(157) | 129-155 (27) | 130-150 (21) | 138-138 (1) |   |      |      |                     |                    |                                                                                                                                                                                       |

|     |                |              |              |             |   |      |      |                     |                    |                                                                                                                                                                                          |
|-----|----------------|--------------|--------------|-------------|---|------|------|---------------------|--------------------|------------------------------------------------------------------------------------------------------------------------------------------------------------------------------------------|
| 123 | 1s60A<br>(152) | 129-144 (16) | 129-144 (16) | 135-135 (1) | C | 0.46 | 2.12 | 85.53%<br>(130/152) | 7.89%<br>(12/152)  |  <p>Aminoglycoside 6'-N-acetyltransferase<br/>P300/CBP associating factor</p>                         |
|     | 1cm0B<br>(161) | 619-651 (33) | 619-651 (33) | 135-135 (1) |   |      |      |                     |                    |                                                                                                                                                                                          |
| 124 | 1s60A<br>(152) | 131-142 (12) | 131-142 (12) | 136-136 (1) | C | 0.47 | 2.07 | 84.21%<br>(128/152) | 19.74%<br>(30/152) |  <p>Aminoglycoside 6'-N-acetyltransferase<br/>Hypothetical protein yqjY</p>                           |
|     | 1mk4A<br>(157) | 123-155 (33) | 123-155 (33) | 136-136 (1) |   |      |      |                     |                    |                                                                                                                                                                                          |
| 125 | 1s60A<br>(152) | 131-144 (14) | 133-144 (12) | 135-135 (1) | C | 0.44 | 2.26 | 86.18%<br>(131/152) | 7.24%<br>(11/152)  |  <p>Aminoglycoside 6'-N-acetyltransferase<br/>General control of amino acid<br/>synthesis prote</p> |
|     | 1z4rA<br>(163) | 626-656 (31) | 628-656 (29) | 135-135 (1) |   |      |      |                     |                    |                                                                                                                                                                                          |

|     |                |              |              |             |   |      |      |                     |                    |                                                                                                                                                           |
|-----|----------------|--------------|--------------|-------------|---|------|------|---------------------|--------------------|-----------------------------------------------------------------------------------------------------------------------------------------------------------|
| 126 | 1s60A<br>(152) | 137-144 (8)  | 137-144 (8)  | 139-139 (1) | C | 0.39 | 2.23 | 89.47%<br>(136/152) | 13.16%<br>(20/152) | 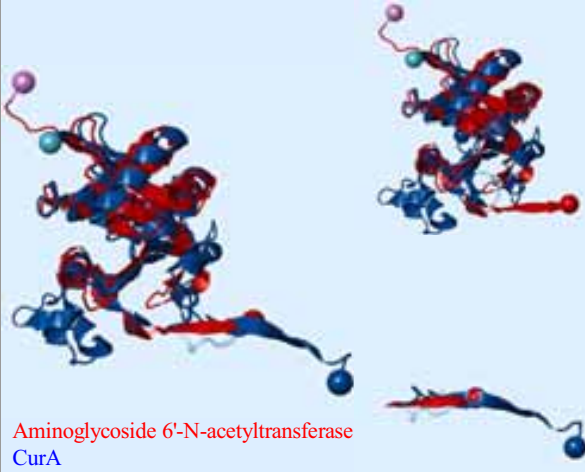 <p>Aminoglycoside 6'-N-acetyltransferase<br/>CurA</p>                  |
|     | 2reeA<br>(199) | 399-415 (17) | 399-415 (17) | 139-139 (1) |   |      |      |                     |                    |                                                                                                                                                           |
| 127 | 1s60A<br>(152) | -5-12 (18)   | -5-2 (8)     | 0-0 (1)     | N | 0.43 | 2.24 | 88.82%<br>(135/152) | 11.18%<br>(17/152) |  <p>Aminoglycoside 6'-N-acetyltransferase<br/>Acetyl transferase</p>  |
|     | 1s7fA<br>(181) | -4-22 (27)   | -4-12 (17)   | 0-0 (1)     |   |      |      |                     |                    |                                                                                                                                                           |
| 128 | 1s60A<br>(152) | 135-144 (10) | 136-144 (9)  | 139-139 (1) | C | 0.42 | 2.21 | 88.16%<br>(134/152) | 10.53%<br>(16/152) |  <p>Aminoglycoside 6'-N-acetyltransferase<br/>Acetyl transferase</p> |
|     | 1s7fA<br>(181) | 153-169 (17) | 154-169 (16) | 139-139 (1) |   |      |      |                     |                    |                                                                                                                                                           |

|     |                |              |              |             |   |      |      |                     |                    |                                                                                                                                                                       |
|-----|----------------|--------------|--------------|-------------|---|------|------|---------------------|--------------------|-----------------------------------------------------------------------------------------------------------------------------------------------------------------------|
| 129 | 1s60A<br>(152) | 129-144 (16) | 129-144 (16) | 135-136 (2) | C | 0.43 | 2.27 | 85.53%<br>(130/152) | 8.55%<br>(13/152)  | 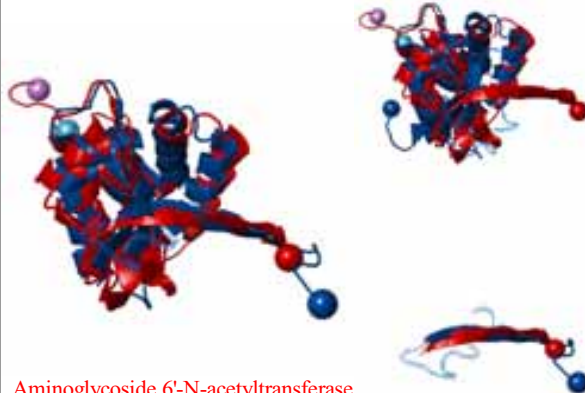 <p>Aminoglycoside 6'-N-acetyltransferase<br/>TGCN5 histone acetyl transferase</p> |
|     | 1m1dA<br>(163) | 171-203 (33) | 171-203 (33) | 135-136 (2) |   |      |      |                     |                    |                                                                                                                                                                       |
| 130 | 1s60A<br>(152) | 131-139 (9)  | 135-139 (5)  | 138-138 (1) | C | 0.41 | 2.02 | 89.47%<br>(136/152) | 15.13%<br>(23/152) |  <p>Aminoglycoside 6'-N-acetyltransferase<br/>Conserved hypothetical protein</p>   |
|     | 1yvoA<br>(169) | 138-156 (19) | 142-156 (15) | 138-138 (1) |   |      |      |                     |                    |                                                                                                                                                                       |
| 131 | 1s60A<br>(152) | 131-143 (13) | 138-140 (3)  | 139-139 (1) | C | 0.51 | 2.13 | 88.16%<br>(134/152) | 10.53%<br>(16/152) |  <p>Aminoglycoside 6'-N-acetyltransferase<br/>Human MAK3 homolog</p>             |
|     | 2ob0A<br>(154) | 128-153 (26) | 135-150 (16) | 139-139 (1) |   |      |      |                     |                    |                                                                                                                                                                       |

|     |                |              |              |             |   |      |      |                     |                    |                                                                                                                                                                            |
|-----|----------------|--------------|--------------|-------------|---|------|------|---------------------|--------------------|----------------------------------------------------------------------------------------------------------------------------------------------------------------------------|
| 132 | 1s60A<br>(152) | 131-144 (14) | 137-141 (5)  | 137-137 (1) | C | 0.47 | 2.35 | 90.13%<br>(137/152) | 14.47%<br>(22/152) | 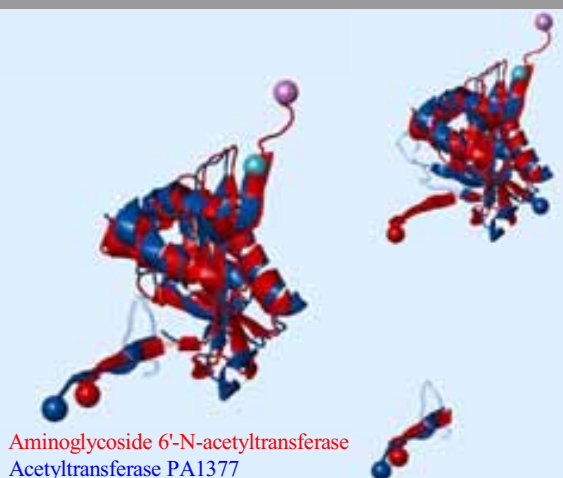 <p>Aminoglycoside 6'-N-acetyltransferase<br/>Acetyltransferase PA1377</p>               |
|     | 2vi7A<br>(163) | 142-167 (26) | 148-164 (17) | 137-137 (1) |   |      |      |                     |                    |                                                                                                                                                                            |
| 133 | 1s60A<br>(152) | 137-140 (4)  | 137-140 (4)  | 138-138 (1) | C | 0.50 | 2.02 | 89.29%<br>(125/140) | 12.86%<br>(18/140) |  <p>Aminoglycoside 6'-N-acetyltransferase<br/>Similar to hypothetical proteins</p>     |
|     | 1q2yA<br>(140) | 124-133 (10) | 124-133 (10) | 138-138 (1) |   |      |      |                     |                    |                                                                                                                                                                            |
| 134 | 1s60A<br>(152) | 135-144 (10) | 139-144 (6)  | 139-140 (2) | C | 0.37 | 2.74 | 94.08%<br>(143/152) | 12.50%<br>(19/152) |  <p>Aminoglycoside 6'-N-acetyltransferase<br/>Hypothetical protein rv1347c/mt1389</p> |
|     | 1yk3A<br>(198) | 188-201 (14) | 192-201 (10) | 139-140 (2) |   |      |      |                     |                    |                                                                                                                                                                            |

|     |                |              |              |             |   |      |      |                     |                    |                                                                                                                                                                                  |
|-----|----------------|--------------|--------------|-------------|---|------|------|---------------------|--------------------|----------------------------------------------------------------------------------------------------------------------------------------------------------------------------------|
| 135 | 1s60A<br>(152) | 133-144 (12) | 133-137 (5)  | 135-135 (1) | C | 0.41 | 2.40 | 85.53%<br>(130/152) | 7.24%<br>(11/152)  |  <p>Aminoglycoside 6'-N-acetyltransferase<br/>Protein (transcriptional activator<br/>GCN5)</p> |
|     | 1yghA<br>(164) | 227-257 (31) | 227-249 (23) | 135-135 (1) |   |      |      |                     |                    |                                                                                                                                                                                  |
| 136 | 1s60A<br>(152) | 131-141 (11) | 135-141 (7)  | 137-137 (1) | C | 0.52 | 2.21 | 91.72%<br>(133/145) | 15.17%<br>(22/145) |  <p>Aminoglycoside 6'-N-acetyltransferase<br/>Glyphosate N-acetyltransferase</p>             |
|     | 2bswA<br>(145) | 122-137 (16) | 126-137 (12) | 137-137 (1) |   |      |      |                     |                    |                                                                                                                                                                                  |
| 137 | 1s60A<br>(152) | 135-140 (6)  | 136-138 (3)  | 137-137 (1) | C | 0.45 | 2.30 | 90.13%<br>(137/152) | 15.79%<br>(24/152) |  <p>Aminoglycoside 6'-N-acetyltransferase<br/>Acetyltransferase, GNAT family</p>            |
|     | 2pc1A<br>(173) | 149-160 (12) | 150-158 (9)  | 137-137 (1) |   |      |      |                     |                    |                                                                                                                                                                                  |

|     |                |              |              |             |   |      |      |                     |                    |                                                                                                                                                                                        |
|-----|----------------|--------------|--------------|-------------|---|------|------|---------------------|--------------------|----------------------------------------------------------------------------------------------------------------------------------------------------------------------------------------|
| 138 | 1s60A<br>(152) | 134-137 (4)  | 134-137 (4)  | 134-136 (3) | C | 0.51 | 2.08 | 90.13%<br>(137/152) | 14.47%<br>(22/152) | 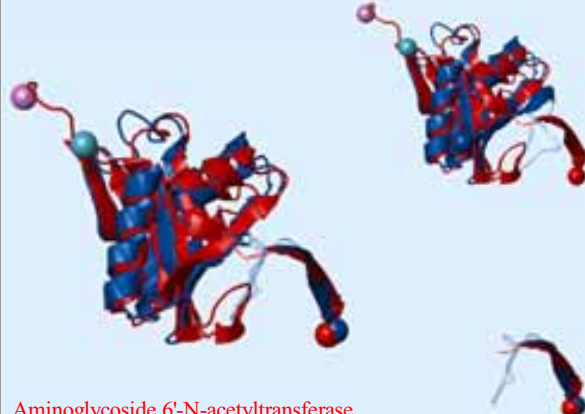 <p>Aminoglycoside 6'-N-acetyltransferase<br/>Acetyltransferase, GNAT family</p>                    |
|     | 2q7bA<br>(164) | 137-153 (17) | 137-153 (17) | 134-136 (3) |   |      |      |                     |                    |                                                                                                                                                                                        |
| 139 | 1s60A<br>(152) | 134-144 (11) | 134-144 (11) | 134-135 (2) | C | 0.47 | 1.88 | 82.89%<br>(126/152) | 14.47%<br>(22/152) |  <p>Aminoglycoside 6'-N-acetyltransferase<br/>GCN5-related<br/>N-acetyltransferase:aminotransfe</p> |
|     | 2fiwA<br>(160) | 135-154 (20) | 135-154 (20) | 134-135 (2) |   |      |      |                     |                    |                                                                                                                                                                                        |
| 140 | 1s60A<br>(152) | 129-143 (15) | 134-139 (6)  | 136-137 (2) | C | 0.51 | 2.06 | 94.53%<br>(121/128) | 15.63%<br>(20/128) |  <p>Aminoglycoside 6'-N-acetyltransferase<br/>Uncharacterized protein yhhK</p>                    |
|     | 2k5tA<br>(128) | 114-127 (14) | 119-123 (5)  | 136-137 (2) |   |      |      |                     |                    |                                                                                                                                                                                        |

|     |                |              |              |             |   |      |      |                     |                    |                                                                                                                                                                                         |
|-----|----------------|--------------|--------------|-------------|---|------|------|---------------------|--------------------|-----------------------------------------------------------------------------------------------------------------------------------------------------------------------------------------|
| 141 | 1s60A<br>(152) | 130-144 (15) | 130-144 (15) | 138-138 (1) | C | 0.49 | 2.08 | 86.84%<br>(132/152) | 13.82%<br>(21/152) | 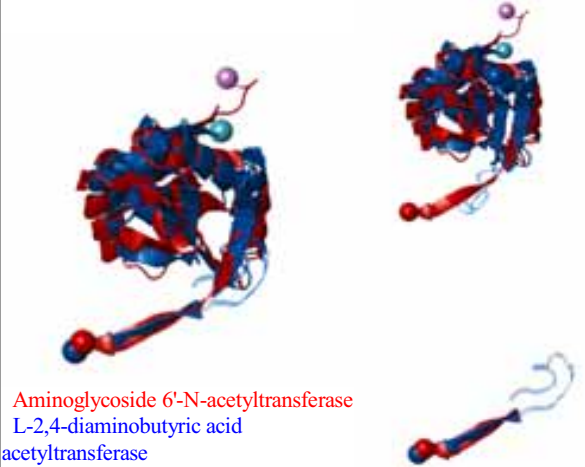 <p>Aminoglycoside 6'-N-acetyltransferase<br/>L-2,4-diaminobutyric acid<br/>acetyltransferase</p>     |
|     | 3d3sA<br>(159) | 124-158 (35) | 124-158 (35) | 138-138 (1) |   |      |      |                     |                    |                                                                                                                                                                                         |
| 142 | 1s60A<br>(152) | 131-141 (11) | 138-141 (4)  | 138-138 (1) | C | 0.39 | 2.74 | 90.13%<br>(137/152) | 14.47%<br>(22/152) |  <p>Aminoglycoside 6'-N-acetyltransferase<br/>Aminoglycoside 6-N-acetyltransferase<br/>type Ib1</p> |
|     | 2pr8A<br>(173) | 158-174 (17) | 165-174 (10) | 138-138 (1) |   |      |      |                     |                    |                                                                                                                                                                                         |
| 143 | 1s60A<br>(152) | 1-30 (32)    | 15-30 (16)   | 15-30 (16)  | N | 0.43 | 2.48 | 86.39%<br>(127/147) | 12.24%<br>(18/147) |  <p>Aminoglycoside 6'-N-acetyltransferase<br/>Spermine/spermidine<br/>acetyltransferase</p>        |
|     | 2fl4A<br>(147) | 1-32 (32)    | 18-32 (15)   | 15-30 (16)  |   |      |      |                     |                    |                                                                                                                                                                                         |



|     |                |              |              |             |   |      |      |                     |                    |                                                                                                                                                                                 |
|-----|----------------|--------------|--------------|-------------|---|------|------|---------------------|--------------------|---------------------------------------------------------------------------------------------------------------------------------------------------------------------------------|
| 144 | 1s60A<br>(152) | 130-142 (13) | 131-142 (12) | 136-136 (1) | C | 0.34 | 2.36 | 75.51%<br>(111/147) | 11.56%<br>(17/147) | 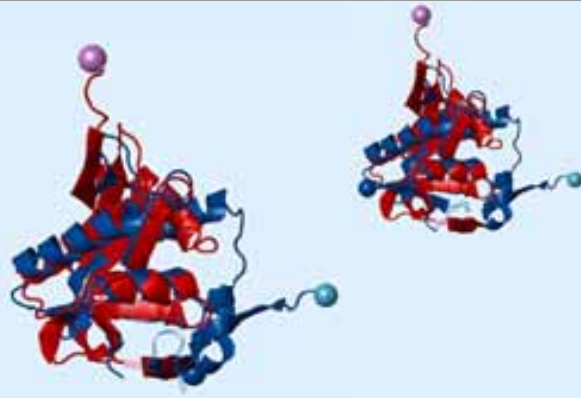<br>Aminoglycoside 6'-N-acetyltransferase<br>Spermine/spermidine<br>acetyltransferase         |
|     | 2fl4A<br>(147) | 125-145 (21) | 126-145 (20) | 136-136 (1) |   |      |      |                     |                    |                                                                                                                                                                                 |
| 145 | 1s60A<br>(152) | 121-144 (24) | 136-144 (9)  | 139-141 (3) | C | 0.36 | 2.57 | 82.89%<br>(126/152) | 12.50%<br>(19/152) | <br>Aminoglycoside 6'-N-acetyltransferase<br>Protein (arylalkylamine<br>N-acetyltransferase) |
|     | 1b6bA<br>(168) | 163-192 (30) | 177-192 (16) | 139-141 (3) |   |      |      |                     |                    |                                                                                                                                                                                 |
| 146 | 1s60A<br>(152) | 133-139 (7)  | 135-139 (5)  | 135-137 (3) | C | 0.42 | 2.38 | 82.89%<br>(126/152) | 8.55%<br>(13/152)  | <br>Aminoglycoside 6'-N-acetyltransferase<br>Uncharacterized N-acetyltransferase<br>ylbP   |
|     | 2pr1A<br>(152) | 129-143 (15) | 131-143 (13) | 135-137 (3) |   |      |      |                     |                    |                                                                                                                                                                                 |

|     |                |              |              |             |   |      |      |                     |                    |                                                                                                                                                                                          |
|-----|----------------|--------------|--------------|-------------|---|------|------|---------------------|--------------------|------------------------------------------------------------------------------------------------------------------------------------------------------------------------------------------|
| 147 | 1s60A<br>(152) | 104-142 (39) | 129-139 (11) | 138-138 (1) | C | 0.42 | 2.44 | 84.56%<br>(126/149) | 10.74%<br>(16/149) |  <p>Aminoglycoside 6'-N-acetyltransferase<br/>Hypothetical protein PA0115</p>                         |
|     | 1xebA<br>(149) | 104-149 (46) | 127-146 (20) | 138-138 (1) |   |      |      |                     |                    |                                                                                                                                                                                          |
| 148 | 1s60A<br>(152) | -5-12 (18)   | -5-12 (18)   | 1-1 (1)     | N | 0.42 | 2.60 | 91.45%<br>(139/152) | 8.55%<br>(13/152)  |  <p>Aminoglycoside 6'-N-acetyltransferase<br/>Ribosomal-protein-serine<br/>acetyltransferase, p</p>   |
|     | 2fckA<br>(174) | 2-23 (22)    | 2-23 (22)    | 1-1 (1)     |   |      |      |                     |                    |                                                                                                                                                                                          |
| 149 | 1s60A<br>(152) | 135-144 (10) | 135-144 (10) | 140-140 (1) | C | 0.40 | 2.58 | 89.47%<br>(136/152) | 9.21%<br>(14/152)  |  <p>Aminoglycoside 6'-N-acetyltransferase<br/>Ribosomal-protein-serine<br/>acetyltransferase, p</p> |
|     | 2fckA<br>(174) | 155-170 (16) | 155-170 (16) | 140-140 (1) |   |      |      |                     |                    |                                                                                                                                                                                          |

|     |                |              |              |              |   |      |      |                     |                    |                                                                                                                                                                   |
|-----|----------------|--------------|--------------|--------------|---|------|------|---------------------|--------------------|-------------------------------------------------------------------------------------------------------------------------------------------------------------------|
| 150 | 1tiyA<br>(157) | 110-141 (32) | 112-129 (18) | 114-130 (17) | C | 0.58 | 1.49 | 92.99%<br>(146/157) | 26.11%<br>(41/157) |  <p>Guanine deaminase<br/>Cytidine and deoxycytidylate<br/>deaminase zinc-b</p> |
|     | 2g84A<br>(189) | 139-171 (33) | 141-158 (18) | 114-130 (17) |   |      |      |                     |                    |                                                                                                                                                                   |
| 151 | 1tiyA<br>(157) | 101-142 (42) | 101-141 (41) | 104-135 (32) | C | 0.56 | 1.72 | 87.01%<br>(134/154) | 29.22%<br>(45/154) |  <p>Guanine deaminase<br/>TRNA adenosine deaminase TadA</p>                   |
|     | 1wwrA<br>(154) | 100-134 (35) | 100-133 (34) | 104-135 (32) |   |      |      |                     |                    |                                                                                                                                                                   |
| 152 | 1tiyA<br>(157) | 104-146 (43) | 104-133 (30) | 104-131 (28) | C | 0.58 | 1.59 | 88.08%<br>(133/151) | 29.14%<br>(44/151) |  <p>Guanine deaminase<br/>TRNA adenosine deaminase</p>                       |
|     | 2b3jA<br>(151) | 104-140 (37) | 104-127 (24) | 104-131 (28) |   |      |      |                     |                    |                                                                                                                                                                   |

|     |                |              |              |              |   |      |      |                     |                    |                                                                                                                                                                 |
|-----|----------------|--------------|--------------|--------------|---|------|------|---------------------|--------------------|-----------------------------------------------------------------------------------------------------------------------------------------------------------------|
| 153 | 1tiyA<br>(157) | 93-141 (49)  | 104-141 (38) | 104-141 (38) | C | 0.47 | 1.92 | 84.08%<br>(132/157) | 24.20%<br>(38/157) |  <p>Guanine deaminase<br/>TRNA-specific adenosine deaminase</p>               |
|     | 2nx8A<br>(168) | 105-161 (57) | 116-161 (46) | 104-141 (38) |   |      |      |                     |                    |                                                                                                                                                                 |
| 154 | 1tiyA<br>(157) | 103-143 (41) | 104-130 (27) | 105-133 (29) | C | 0.58 | 1.62 | 86.54%<br>(135/156) | 25.64%<br>(40/156) |  <p>Guanine deaminase<br/>TRNA-specific adenosine deaminase</p>             |
|     | 1z3aA<br>(156) | 118-152 (35) | 119-139 (21) | 105-133 (29) |   |      |      |                     |                    |                                                                                                                                                                 |
| 155 | 2p1jA<br>(164) | 491-501 (11) | 492-501 (10) | 494-501 (8)  | C | 0.68 | 1.49 | 95.12%<br>(156/164) | 29.27%<br>(48/164) |  <p>DNA polymerase III polC-type<br/>DNA polymerase III, epsilon chain</p> |
|     | 1j53A<br>(174) | 151-163 (13) | 152-163 (12) | 494-501 (8)  |   |      |      |                     |                    |                                                                                                                                                                 |

|     |                |              |              |             |   |      |      |                     |                    |                                                                                                                                                                           |
|-----|----------------|--------------|--------------|-------------|---|------|------|---------------------|--------------------|---------------------------------------------------------------------------------------------------------------------------------------------------------------------------|
| 156 | 2p1jA<br>(164) | 492-501 (10) | 492-501 (10) | 493-501 (9) | C | 0.45 | 2.06 | 94.51%<br>(155/164) | 25.00%<br>(41/164) | 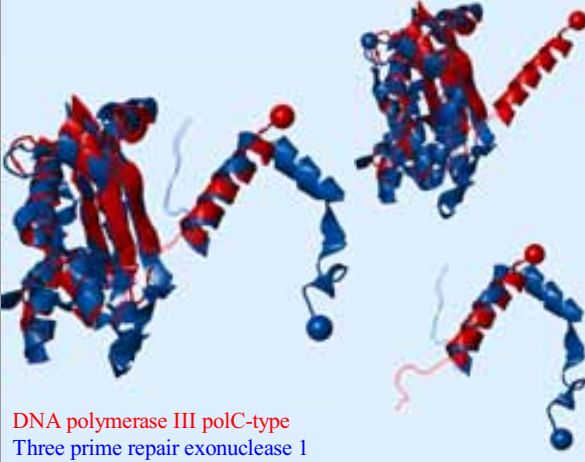 <p>DNA polymerase III polC-type<br/>Three prime repair exonuclease 1</p>               |
|     | 2iocB<br>(220) | 186-196 (11) | 186-196 (11) | 493-501 (9) |   |      |      |                     |                    |                                                                                                                                                                           |
| 157 | 2p1jA<br>(164) | 491-501 (11) | 493-501 (9)  | 494-501 (8) | C | 0.38 | 2.14 | 93.29%<br>(153/164) | 18.90%<br>(31/164) |  <p>DNA polymerase III polC-type<br/>CCR4-NOT transcription complex<br/>subunit 7</p> |
|     | 2d5rA<br>(252) | 215-226 (12) | 217-226 (10) | 494-501 (8) |   |      |      |                     |                    |                                                                                                                                                                           |
| 158 | 2p1jA<br>(164) | 492-501 (10) | 494-501 (8)  | 494-501 (8) | C | 0.36 | 2.23 | 92.68%<br>(152/164) | 17.68%<br>(29/164) |  <p>DNA polymerase III polC-type<br/>Specl8.06c protein</p>                          |
|     | 2p51A<br>(255) | 226-236 (11) | 228-236 (9)  | 494-501 (8) |   |      |      |                     |                    |                                                                                                                                                                           |

|     |                |              |              |              |   |      |      |                     |                    |                                                                                                                                                              |
|-----|----------------|--------------|--------------|--------------|---|------|------|---------------------|--------------------|--------------------------------------------------------------------------------------------------------------------------------------------------------------|
| 159 | 2p1jA<br>(164) | 491-504 (14) | 491-501 (11) | 492-501 (10) | C | 0.51 | 2.14 | 89.02%<br>(146/164) | 19.51%<br>(32/164) | 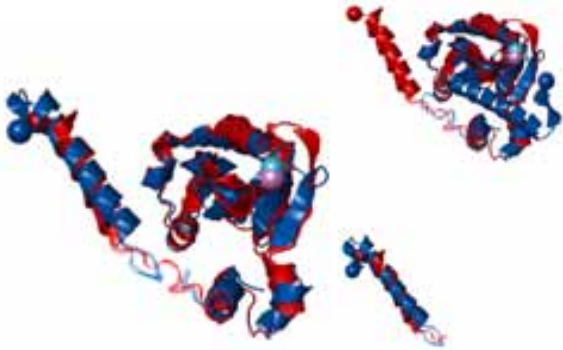 <p>DNA polymerase III polC-type<br/>Interferon stimulated gene 20kDa</p> |
|     | 1wljA<br>(168) | 136-153 (18) | 136-150 (15) | 492-501 (10) |   |      |      |                     |                    |                                                                                                                                                              |
| 160 | 2p1jA<br>(164) | 477-501 (25) | 477-501 (25) | 477-501 (25) | C | 0.42 | 2.09 | 82.93%<br>(136/164) | 15.85%<br>(26/164) |  <p>DNA polymerase III polC-type<br/>Oligoribonuclease</p>               |
|     | 2gbzA<br>(179) | 144-162 (19) | 144-162 (19) | 477-501 (25) |   |      |      |                     |                    |                                                                                                                                                              |
| 161 | 2jevA<br>(169) | 147-162 (16) | 147-156 (10) | 149-152 (4)  | C | 0.39 | 2.82 | 89.35%<br>(151/169) | 10.65%<br>(18/169) |  <p>Diamine acetyltransferase 1<br/>Hypothetical protein PA3270</p>     |
|     | lyreA<br>(183) | 154-180 (27) | 154-174 (21) | 149-152 (4)  |   |      |      |                     |                    |                                                                                                                                                              |

|     |                |                               |                               |                             |   |      |      |                     |                    |                                                                                                                                                                                                    |
|-----|----------------|-------------------------------|-------------------------------|-----------------------------|---|------|------|---------------------|--------------------|----------------------------------------------------------------------------------------------------------------------------------------------------------------------------------------------------|
| 162 | 1vguA<br>(214) | 125-159 (26),<br>153-171 (19) | 125-141 (17),<br>153-166 (14) | 138-141 (4),<br>156-160 (5) | M | 0.52 | 2.12 | 93.93%<br>(201/214) | 14.49%<br>(31/214) | 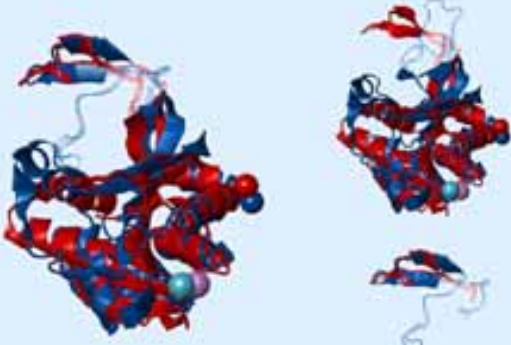 <p>2-C-methyl-D-erythritol 4-phosphate<br/>cytidyl<br/>3-deoxy-manno-octulosonate<br/>cytidyltransferase</p>    |
|     | 1gq9A<br>(241) | 115-149 (35),<br>152-180 (29) | 115-141 (27),<br>152-175 (24) | 138-141 (4),<br>156-160 (5) |   |      |      |                     |                    |                                                                                                                                                                                                    |
| 163 | 1vguA<br>(214) | 125-139 (15),<br>142-173 (32) | 137-139 (3),<br>142-161 (20)  | 137-138 (2),<br>159-161 (3) | M | 0.42 | 2.29 | 95.79%<br>(205/214) | 13.55%<br>(29/214) |  <p>2-C-methyl-D-erythritol 4-phosphate<br/>cytidyl<br/>UTP-glucose-1-phosphate<br/>uridyltransferase</p>       |
|     | 2pa4A<br>(294) | 159-179 (21),<br>182-223 (42) | 171-179 (9),<br>182-212 (31)  | 137-138 (2),<br>159-161 (3) |   |      |      |                     |                    |                                                                                                                                                                                                    |
| 164 | 1vguA<br>(214) | 125-141 (17),<br>144-169 (26) | 139-141 (3),<br>145-160 (16)  | 139-140 (2),<br>156-157 (2) | M | 0.32 | 2.45 | 92.06%<br>(197/214) | 19.16%<br>(41/214) |  <p>2-C-methyl-D-erythritol 4-phosphate<br/>cytidyl<br/>Putative mannose-1-phosphate<br/>guanylyl transfe</p> |
|     | 2cu2A<br>(335) | 127-150 (24),<br>153-192 (40) | 143-150 (8),<br>154-183 (30)  | 139-140 (2),<br>156-157 (2) |   |      |      |                     |                    |                                                                                                                                                                                                    |

|     |                |                               |                               |                             |   |      |      |                     |                    |                                                                                                                                                                                              |
|-----|----------------|-------------------------------|-------------------------------|-----------------------------|---|------|------|---------------------|--------------------|----------------------------------------------------------------------------------------------------------------------------------------------------------------------------------------------|
| 165 | lvguA<br>(214) | 125-139 (15),<br>144-166 (23) | 125-138 (14),<br>145-161 (17) | 137-138 (2),<br>157-161 (5) | M | 0.40 | 2.37 | 93.93%<br>(201/214) | 11.21%<br>(24/214) |  <p>2-C-methyl-D-erythritol 4-phosphate<br/>cytidyl<br/>Glucose-1-phosphate<br/>thymidyltransferase</p>    |
|     | lh5rA<br>(290) | 128-146 (19),<br>151-176 (26) | 128-145 (18),<br>152-171 (20) | 137-138 (2),<br>157-161 (5) |   |      |      |                     |                    |                                                                                                                                                                                              |
| 166 | lvguA<br>(214) | 124-139 (16),<br>144-166 (23) | 124-139 (16),<br>144-166 (23) | 137-138 (2),<br>157-161 (5) | M | 0.40 | 2.40 | 94.39%<br>(202/214) | 11.21%<br>(24/214) |  <p>2-C-methyl-D-erythritol 4-phosphate<br/>cytidyl<br/>Glucose-1-phosphate<br/>thymidyltransferase</p>   |
|     | liimA<br>(289) | 127-146 (20),<br>151-176 (26) | 127-146 (20),<br>151-176 (26) | 137-138 (2),<br>157-161 (5) |   |      |      |                     |                    |                                                                                                                                                                                              |
| 167 | lvguA<br>(214) | 122-140 (19),<br>153-166 (14) | 122-140 (19),<br>153-161 (9)  | 139-140 (2),<br>156-160 (5) | M | 0.39 | 2.38 | 93.93%<br>(201/214) | 14.49%<br>(31/214) |  <p>2-C-methyl-D-erythritol 4-phosphate<br/>cytidyl<br/>Glucose-1-phosphate<br/>thymidyltransferase</p> |
|     | llvwA<br>(295) | 125-144 (20),<br>156-173 (18) | 125-144 (20),<br>156-168 (13) | 139-140 (2),<br>156-160 (5) |   |      |      |                     |                    |                                                                                                                                                                                              |



|     |                |                               |                               |                             |   |      |      |                     |                    |                                                                                                                                                                                            |
|-----|----------------|-------------------------------|-------------------------------|-----------------------------|---|------|------|---------------------|--------------------|--------------------------------------------------------------------------------------------------------------------------------------------------------------------------------------------|
| 168 | lvguA<br>(214) | 122-139 (18),<br>144-166 (23) | 122-139 (18),<br>145-161 (17) | 137-138 (2),<br>157-161 (5) | M | 0.40 | 2.32 | 93.46%<br>(200/214) | 11.21%<br>(24/214) | 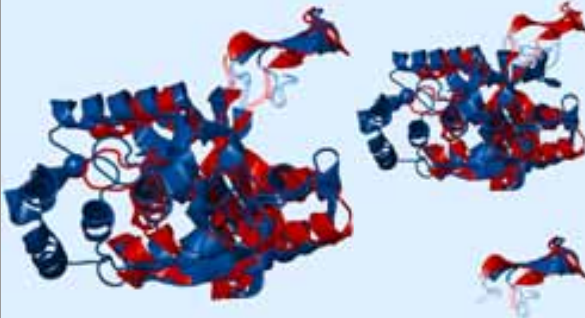 <p>2-C-methyl-D-erythritol 4-phosphate<br/>cytidyl<br/>Glucose-1-phosphate<br/>thymidyltransferase</p> |
|     | lfxoA<br>(292) | 127-145 (19),<br>150-175 (26) | 127-145 (19),<br>151-170 (20) | 137-138 (2),<br>157-161 (5) |   |      |      |                     |                    |                                                                                                                                                                                            |
| 169 | 2c49A<br>(299) | 7-35 (29),<br>24-40 (17)      | 17-25 (9),<br>35-39 (5)       | 22-25 (4),<br>35-36 (2)     | M | 0.50 | 2.11 | 92.98%<br>(278/299) | 20.07%<br>(60/299) |  <p>Sugar kinase MJ0406<br/>Protein (adenosine kinase)</p>                                              |
|     | lhx4A<br>(342) | 5-42 (38),<br>31-61 (31)      | 18-32 (15),<br>42-60 (19)     | 22-25 (4),<br>35-36 (2)     |   |      |      |                     |                    |                                                                                                                                                                                            |
| 170 | lh1cA<br>(329) | 7-57 (51)                     | 7-57 (51)                     | 41-54 (14)                  | N | 0.26 | 2.67 | 93.01%<br>(306/329) | 12.16%<br>(40/329) |  <p>Histidinol-phosphate aminotransferase<br/>Kynurenine/alpha-aminoadipate<br/>aminotransferase</p>  |
|     | 2qlrA<br>(425) | 6-79 (74)                     | 6-79 (74)                     | 41-54 (14)                  |   |      |      |                     |                    |                                                                                                                                                                                            |

|     |                |             |             |             |   |      |      |                      |                      |                                                                                                                                                                                                                                         |
|-----|----------------|-------------|-------------|-------------|---|------|------|----------------------|----------------------|-----------------------------------------------------------------------------------------------------------------------------------------------------------------------------------------------------------------------------------------|
| 171 | 1a5pA<br>(124) | 15-22 (8)   | 18-22 (5)   | 18-22 (5)   | N | 0.95 | 0.68 | 100.00%<br>(124/124) | 98.39%<br>(122/124)  |  <br>Ribonuclease A<br>Ribonuclease A                              |
|     | 1a2wA<br>(124) | 15-22 (8)   | 18-22 (5)   | 18-22 (5)   |   |      |      |                      |                      |                                                                                                                                                                                                                                         |
| 172 | 1nloC<br>(56)  | 28-56 (29)  | 29-42 (14)  | 35-41 (7)   | C | 0.69 | 1.23 | 92.86%<br>(52/56)    | 25.00%<br>(14/56)    |  <br>C-SRC<br>EPS8                                               |
|     | 1aojA<br>(60)  | 27-53 (27)  | 28-40 (13)  | 35-41 (7)   |   |      |      |                      |                      |                                                                                                                                                                                                                                         |
| 173 | 1eydA<br>(136) | 112-120 (9) | 112-120 (9) | 113-120 (8) | C | 0.92 | 0.51 | 100.00%<br>(129/129) | 100.00%<br>(129/129) |  <br>Staphylococcal nuclease<br>Staphylococcal nuclease dimer |
|     | 1sndA<br>(129) | 112-120 (9) | 112-120 (9) | 113-120 (8) |   |      |      |                      |                      |                                                                                                                                                                                                                                         |

|     |                |              |              |              |   |      |      |                      |                     |                                                                                                                                                                     |
|-----|----------------|--------------|--------------|--------------|---|------|------|----------------------|---------------------|---------------------------------------------------------------------------------------------------------------------------------------------------------------------|
| 174 | 1qd0A<br>(128) | 99-116 (18)  | 101-116 (16) | 102-116 (15) | C | 0.64 | 1.49 | 100.00%<br>(102/102) | 70.59%<br>(72/102)  | 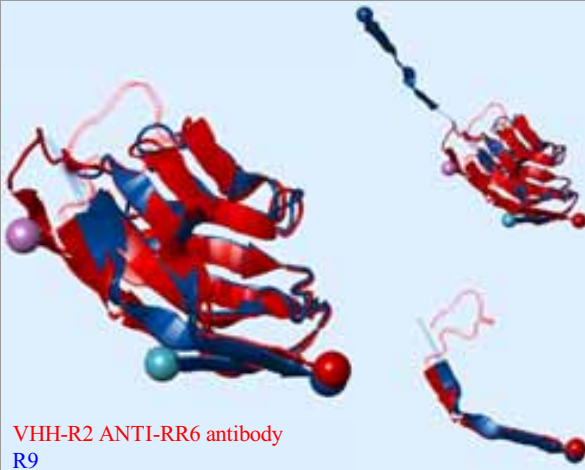 <p>VHH-R2 ANTI-RR6 antibody<br/>R9</p>                                           |
|     | 1sjvA<br>(102) | 91-98 (8)    | 93-98 (6)    | 102-116 (15) |   |      |      |                      |                     |                                                                                                                                                                     |
| 175 | 1pv3A<br>(146) | 941-951 (11) | 941-951 (11) | 944-948 (5)  | N | 0.42 | 2.02 | 91.55%<br>(130/142)  | 83.80%<br>(119/142) |  <p>Focal adhesion kinase 1<br/>Focal adhesion kinase 1</p>                     |
|     | 1k04A<br>(142) | 940-950 (11) | 940-950 (11) | 944-948 (5)  |   |      |      |                      |                     |                                                                                                                                                                     |
| 176 | 1b6bA<br>(168) | 50-90 (41)   | 50-82 (33)   | 50-80 (31)   | N | 0.38 | 2.03 | 81.43%<br>(114/140)  | 15.71%<br>(22/140)  |  <p>Protein (arylalkylamine<br/>N-acetyltransferase)<br/>Acetyltransferase</p> |
|     | 1y9wA<br>(140) | 23-51 (29)   | 23-42 (20)   | 50-80 (31)   |   |      |      |                      |                     |                                                                                                                                                                     |

|     |                |            |            |            |   |      |      |                     |                    |                                                                                                                                           |
|-----|----------------|------------|------------|------------|---|------|------|---------------------|--------------------|-------------------------------------------------------------------------------------------------------------------------------------------|
| 177 | 1bsrA<br>(124) | 12-27 (16) | 12-22 (11) | 15-22 (8)  | N | 0.50 | 1.55 | 91.06%<br>(112/123) | 31.71%<br>(39/123) |  <p>Bovine seminal ribonuclease<br/>Angiogenin</p>      |
|     | 1awzA<br>(123) | 13-27 (15) | 13-22 (10) | 15-22 (8)  |   |      |      |                     |                    |                                                                                                                                           |
| 178 | 1bsrA<br>(124) | 15-23 (9)  | 15-23 (9)  | 15-23 (9)  | N | 0.54 | 1.35 | 99.16%<br>(118/119) | 71.43%<br>(85/119) |  <p>Bovine seminal ribonuclease<br/>Ribonuclease I</p> |
|     | 1e21A<br>(119) | 15-23 (9)  | 15-23 (9)  | 15-23 (9)  |   |      |      |                     |                    |                                                                                                                                           |
| 179 | 1bsrA<br>(124) | 9-24 (16)  | 9-24 (16)  | 13-24 (12) | N | 0.57 | 1.89 | 89.52%<br>(111/124) | 33.06%<br>(41/124) |  <p>Bovine seminal ribonuclease<br/>Angiogenin</p>   |
|     | 1gioA<br>(125) | 11-25 (15) | 11-25 (15) | 13-24 (12) |   |      |      |                     |                    |                                                                                                                                           |

|     |                |            |            |            |   |      |      |                     |                    |                                                                                                                                                       |
|-----|----------------|------------|------------|------------|---|------|------|---------------------|--------------------|-------------------------------------------------------------------------------------------------------------------------------------------------------|
| 180 | 1bsrA<br>(124) | 14-52 (39) | 14-28 (15) | 14-26 (13) | N | 0.32 | 2.06 | 92.52%<br>(99/107)  | 24.30%<br>(26/107) | 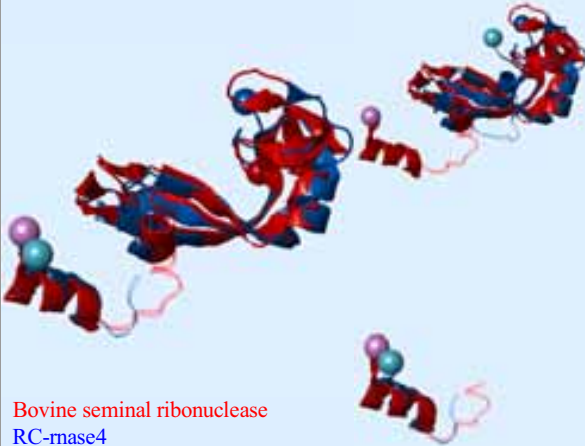 <p>Bovine seminal ribonuclease<br/>RC-mase4</p>                   |
|     | 1kvzA<br>(107) | 13-43 (31) | 13-22 (10) | 14-26 (13) |   |      |      |                     |                    |                                                                                                                                                       |
| 181 | 1bsrA<br>(124) | 11-25 (15) | 14-25 (12) | 14-25 (12) | N | 0.38 | 1.79 | 93.33%<br>(98/105)  | 23.81%<br>(25/105) |  <p>Bovine seminal ribonuclease<br/>P-30 protein</p>              |
|     | 1pu3A<br>(105) | 10-19 (10) | 13-19 (7)  | 14-25 (12) |   |      |      |                     |                    |                                                                                                                                                       |
| 182 | 1bsrA<br>(124) | 15-25 (11) | 15-24 (10) | 15-23 (9)  | N | 0.49 | 1.19 | 95.83%<br>(115/120) | 42.50%<br>(51/120) |  <p>Bovine seminal ribonuclease<br/>Protein (ribonuclease 4)</p> |
|     | 1mfA<br>(120)  | 15-24 (10) | 15-23 (9)  | 15-23 (9)  |   |      |      |                     |                    |                                                                                                                                                       |

|     |                |            |            |            |   |      |      |                      |                     |                                                                                                                                                      |
|-----|----------------|------------|------------|------------|---|------|------|----------------------|---------------------|------------------------------------------------------------------------------------------------------------------------------------------------------|
| 183 | 1bsrA<br>(124) | 12-24 (13) | 12-24 (13) | 15-24 (10) | N | 0.55 | 1.40 | 100.00%<br>(124/124) | 81.45%<br>(101/124) | 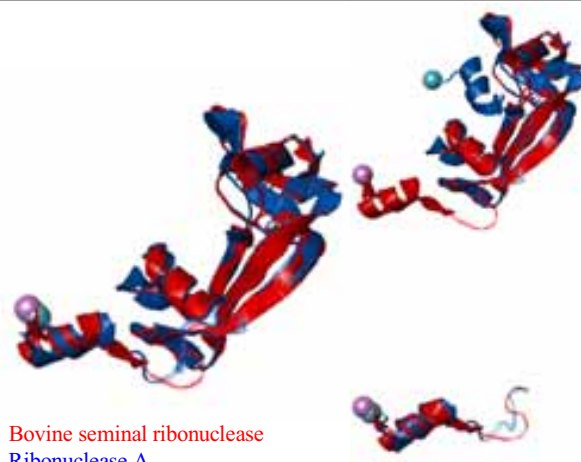 <p>Bovine seminal ribonuclease<br/>Ribonuclease A</p>             |
|     | 2aasA<br>(124) | 12-24 (13) | 12-24 (13) | 15-24 (10) |   |      |      |                      |                     |                                                                                                                                                      |
| 184 | 1bsrA<br>(124) | 8-25 (18)  | 8-25 (18)  | 13-25 (13) | N | 0.37 | 1.85 | 91.13%<br>(113/124)  | 35.48%<br>(44/124)  |  <p>Bovine seminal ribonuclease<br/>Ribonuclease 7</p>           |
|     | 2hkyA<br>(129) | 11-22 (12) | 11-22 (12) | 13-25 (13) |   |      |      |                      |                     |                                                                                                                                                      |
| 185 | 1bsrA<br>(124) | 10-32 (23) | 10-24 (15) | 14-24 (11) | N | 0.53 | 1.40 | 98.39%<br>(122/124)  | 70.16%<br>(87/124)  |  <p>Bovine seminal ribonuclease<br/>Pancreatic ribonuclease</p> |
|     | 2k11A<br>(127) | 10-32 (23) | 10-24 (15) | 14-24 (11) |   |      |      |                      |                     |                                                                                                                                                      |

|     |                |              |              |              |   |      |      |                     |                    |                                                                                                                                                     |
|-----|----------------|--------------|--------------|--------------|---|------|------|---------------------|--------------------|-----------------------------------------------------------------------------------------------------------------------------------------------------|
| 186 | 1bsrA<br>(124) | 14-25 (12)   | 14-25 (12)   | 14-25 (12)   | N | 0.46 | 1.61 | 90.00%<br>(99/110)  | 26.36%<br>(29/110) | 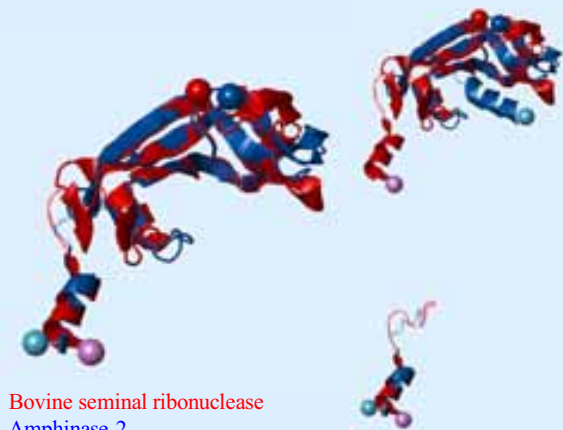 <p>Bovine seminal ribonuclease<br/>Amphinase-2</p>              |
|     | 2p7sA<br>(110) | 17-25 (9)    | 17-25 (9)    | 14-25 (12)   |   |      |      |                     |                    |                                                                                                                                                     |
| 187 | 1cauA<br>(181) | 45-107 (63)  | 45-86 (42)   | 81-86 (6)    | N | 0.26 | 2.39 | 69.61%<br>(126/181) | 10.50%<br>(19/181) |  <p>Canavalin<br/>DTDTP-4-dehydrorhamnose<br/>3,5-epimerase</p> |
|     | 1dztA<br>(183) | 4-72 (69)    | 4-47 (44)    | 81-86 (6)    |   |      |      |                     |                    |                                                                                                                                                     |
| 188 | 1cauA<br>(181) | 145-224 (80) | 162-224 (63) | 176-202 (27) | C | 0.32 | 2.10 | 69.61%<br>(126/181) | 6.63%<br>(12/181)  |  <p>Canavalin<br/>Phosphoglucose isomerase</p>                 |
|     | 1j3rB<br>(185) | 136-187 (52) | 152-187 (36) | 176-202 (27) |   |      |      |                     |                    |                                                                                                                                                     |

|     |                |              |              |              |   |      |      |                     |                    |                                                                                                                                                   |
|-----|----------------|--------------|--------------|--------------|---|------|------|---------------------|--------------------|---------------------------------------------------------------------------------------------------------------------------------------------------|
| 189 | 1cauA<br>(181) | 177-194 (18) | 177-194 (18) | 177-181 (5)  | C | 0.39 | 2.44 | 86.16%<br>(137/159) | 11.95%<br>(19/159) | 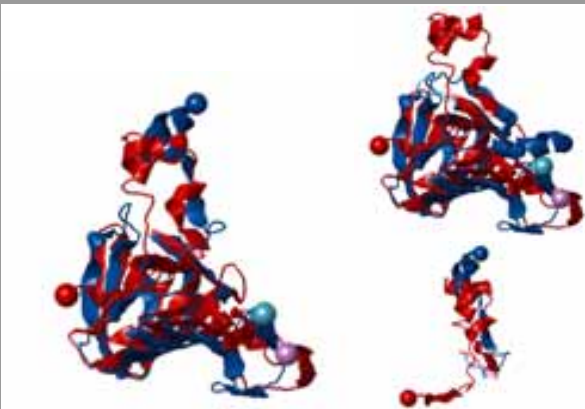 <p>Canavalin<br/>Auxin binding protein 1</p>                   |
|     | 1lr5B<br>(159) | 133-149 (17) | 133-149 (17) | 177-181 (5)  |   |      |      |                     |                    |                                                                                                                                                   |
| 190 | 1cauA<br>(181) | 131-211 (81) | 162-211 (50) | 176-185 (10) | C | 0.31 | 2.40 | 72.93%<br>(132/181) | 5.52%<br>(10/181)  |  <p>Canavalin<br/>Glucose-6-phosphate isomerase</p>            |
|     | 1x7nA<br>(189) | 121-186 (66) | 151-186 (36) | 176-185 (10) |   |      |      |                     |                    |                                                                                                                                                   |
| 191 | 1cauA<br>(181) | 45-86 (42)   | 45-86 (42)   | 76-86 (11)   | N | 0.31 | 2.24 | 70.17%<br>(127/181) | 9.94%<br>(18/181)  |  <p>Canavalin<br/>DTD4-dehydrorhamnose<br/>3,5-epimerase</p> |
|     | 2ixkA<br>(184) | 6-49 (44)    | 6-49 (44)    | 76-86 (11)   |   |      |      |                     |                    |                                                                                                                                                   |



|     |                |                               |                              |                             |   |      |      |                     |                    |                                                                                                                                                                    |
|-----|----------------|-------------------------------|------------------------------|-----------------------------|---|------|------|---------------------|--------------------|--------------------------------------------------------------------------------------------------------------------------------------------------------------------|
| 192 | 1cauA<br>(181) | 50-101 (52)                   | 50-86 (37)                   | 74-86 (13)                  | N | 0.28 | 2.32 | 84.33%<br>(113/134) | 11.19%<br>(15/134) | 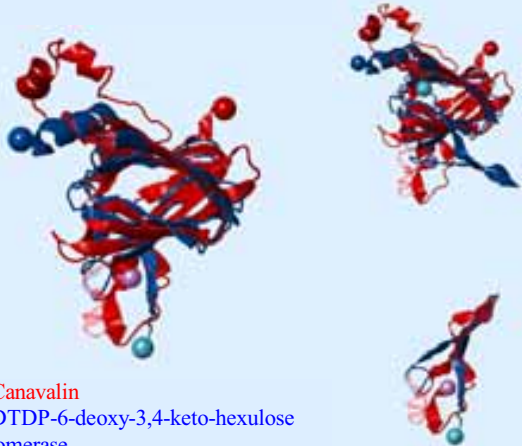 <p>Canavalin<br/>DTDP-6-deoxy-3,4-keto-hexulose<br/>isomerase</p>               |
|     | 2pakB<br>(134) | 3-48 (46)                     | 3-32 (30)                    | 74-86 (13)                  |   |      |      |                     |                    |                                                                                                                                                                    |
| 193 | 1cauA<br>(181) | 44-101 (58)                   | 44-86 (43)                   | 84-86 (3)                   | N | 0.30 | 2.14 | 82.96%<br>(112/135) | 9.63%<br>(13/135)  |  <p>Canavalin<br/>DTDP-6-deoxy-3,4-keto-hexulose<br/>isomerase</p>             |
|     | 2pamA<br>(135) | 2-48 (47)                     | 2-32 (31)                    | 84-86 (3)                   |   |      |      |                     |                    |                                                                                                                                                                    |
| 194 | 1cm0B<br>(161) | 623-640 (18),<br>642-652 (11) | 623-630 (8),<br>642-645 (4)  | 625-630 (6),<br>642-644 (3) | M | 0.43 | 2.43 | 88.20%<br>(142/161) | 6.83%<br>(11/161)  |  <p>P300/CBP associating factor<br/>Aminoglycoside 2'-N-acetyltransferase</p> |
|     | 1m44A<br>(177) | 132-150 (19),<br>154-181 (28) | 132-142 (11),<br>154-156 (3) | 625-630 (6),<br>642-644 (3) |   |      |      |                     |                    |                                                                                                                                                                    |

|     |                |              |              |              |   |      |      |                     |                   |                                                                                                                                                                    |
|-----|----------------|--------------|--------------|--------------|---|------|------|---------------------|-------------------|--------------------------------------------------------------------------------------------------------------------------------------------------------------------|
| 195 | 1cm0B<br>(161) | 623-651 (29) | 623-651 (29) | 625-642 (18) | C | 0.48 | 2.14 | 89.66%<br>(130/145) | 8.97%<br>(13/145) | 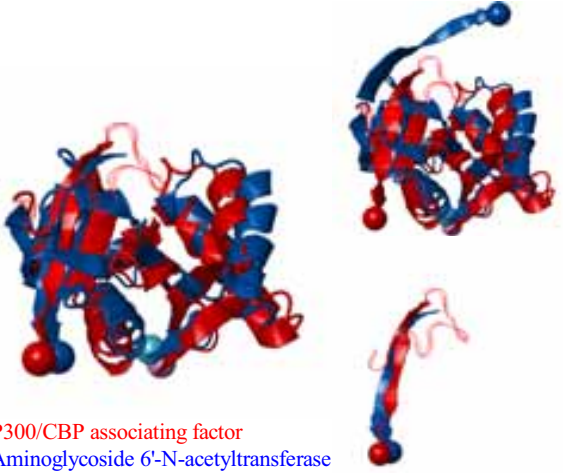 <p>P300/CBP associating factor<br/>Aminoglycoside 6'-N-acetyltransferase</p>    |
|     | 1s3zB<br>(145) | 133-144 (12) | 133-144 (12) | 625-642 (18) |   |      |      |                     |                   |                                                                                                                                                                    |
| 196 | 1cm0B<br>(161) | 623-651 (29) | 623-651 (29) | 625-642 (18) | C | 0.45 | 2.15 | 84.97%<br>(130/153) | 7.84%<br>(12/153) |  <p>P300/CBP associating factor<br/>Aminoglycoside 6'-N-acetyltransferase</p>  |
|     | 1s5kA<br>(153) | 133-144 (12) | 133-144 (12) | 625-642 (18) |   |      |      |                     |                   |                                                                                                                                                                    |
| 197 | 1cm0B<br>(161) | 623-651 (29) | 624-651 (28) | 625-642 (18) | C | 0.47 | 2.10 | 88.89%<br>(128/144) | 8.33%<br>(12/144) |  <p>P300/CBP associating factor<br/>Aminoglycoside 6'-N-acetyltransferase</p> |
|     | 2vbqB<br>(144) | 133-144 (12) | 134-144 (11) | 625-642 (18) |   |      |      |                     |                   |                                                                                                                                                                    |

|     |                |            |            |            |   |      |      |                     |                    |                                                                                                                                                           |
|-----|----------------|------------|------------|------------|---|------|------|---------------------|--------------------|-----------------------------------------------------------------------------------------------------------------------------------------------------------|
| 198 | 1d7eA<br>(119) | 5-43 (39)  | 5-40 (36)  | 17-28 (12) | N | 0.39 | 2.12 | 85.09%<br>(97/114)  | 4.39%<br>(5/114)   | 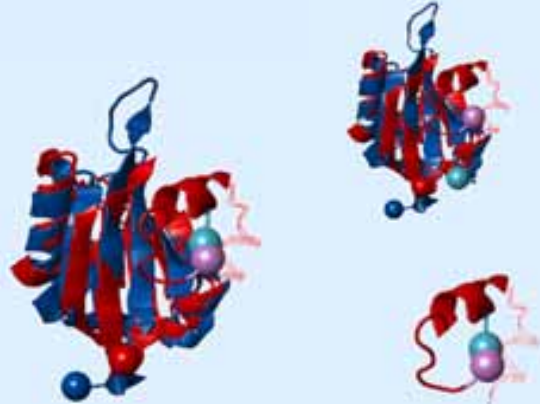 <p>Photoactive yellow protein<br/>Endothelial PAS domain protein 1</p> |
|     | 1p97A<br>(114) | 2-22 (21)  | 2-19 (18)  | 17-28 (12) |   |      |      |                     |                    |                                                                                                                                                           |
| 199 | 1d7eA<br>(119) | 6-31 (26)  | 6-23 (18)  | 18-23 (6)  | N | 0.53 | 2.24 | 90.76%<br>(108/119) | 13.45%<br>(16/119) |  <p>Photoactive yellow protein<br/>Hypothetical protein yddU</p>       |
|     | 1s67L<br>(119) | 17-34 (18) | 17-26 (10) | 18-23 (6)  |   |      |      |                     |                    |                                                                                                                                                           |
| 200 | 1d7eA<br>(119) | 15-22 (8)  | 15-22 (8)  | 16-22 (7)  | N | 0.52 | 2.16 | 90.43%<br>(104/115) | 14.78%<br>(17/115) |  <p>Photoactive yellow protein<br/>Hypothetical protein yddU</p>     |
|     | 1s67U<br>(115) | 24-25 (2)  | 24-25 (2)  | 16-22 (7)  |   |      |      |                     |                    |                                                                                                                                                           |

|     |                |            |           |           |   |      |      |                     |                    |                                                                                                                                                                  |
|-----|----------------|------------|-----------|-----------|---|------|------|---------------------|--------------------|------------------------------------------------------------------------------------------------------------------------------------------------------------------|
| 201 | 1d7eA<br>(119) | 15-24 (10) | 15-22 (8) | 20-22 (3) | N | 0.46 | 2.10 | 91.15%<br>(103/113) | 14.16%<br>(16/113) |  <p>Photoactive yellow protein<br/>Heme pas sensor protein</p>                 |
|     | 1v9zA<br>(113) | 21-27 (7)  | 21-25 (5) | 20-22 (3) |   |      |      |                     |                    |                                                                                                                                                                  |
| 202 | 1d7eA<br>(119) | 15-24 (10) | 17-22 (6) | 19-22 (4) | N | 0.52 | 2.10 | 91.23%<br>(104/114) | 14.04%<br>(16/114) |  <p>Photoactive yellow protein<br/>Heme pas sensor protein</p>                |
|     | 1vb6A<br>(114) | 21-27 (7)  | 23-25 (3) | 19-22 (4) |   |      |      |                     |                    |                                                                                                                                                                  |
| 203 | 1d7eA<br>(119) | 15-22 (8)  | 16-22 (7) | 17-22 (6) | N | 0.54 | 1.85 | 86.55%<br>(103/119) | 15.13%<br>(18/119) |  <p>Photoactive yellow protein<br/>Nitrogen fixation regulatory protein</p> |
|     | 2gj3A<br>(119) | 28-30 (3)  | 29-30 (2) | 17-22 (6) |   |      |      |                     |                    |                                                                                                                                                                  |

|     |                |                           |                           |                           |   |      |      |                     |                    |                                                                                                                                                               |
|-----|----------------|---------------------------|---------------------------|---------------------------|---|------|------|---------------------|--------------------|---------------------------------------------------------------------------------------------------------------------------------------------------------------|
| 204 | 1d7eA<br>(119) | 9-22 (14)                 | 17-22 (6)                 | 18-22 (5)                 | N | 0.56 | 1.88 | 88.24%<br>(105/119) | 16.81%<br>(20/119) | 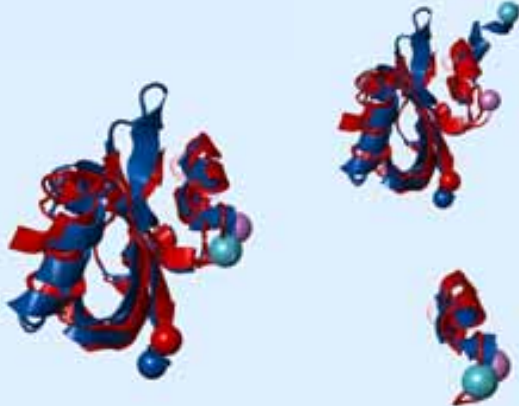 <p>Photoactive yellow protein<br/>Nitrogen fixation regulatory protein</p> |
|     | 2gj3B<br>(119) | 22-30 (9)                 | 29-30 (2)                 | 18-22 (5)                 |   |      |      |                     |                    |                                                                                                                                                               |
| 205 | 1dgmA<br>(346) | 27-53 (27),<br>36-64 (29) | 27-53 (27),<br>36-63 (28) | 27-38 (12),<br>53-63 (11) | M | 0.46 | 2.34 | 92.64%<br>(277/299) | 16.39%<br>(49/299) |  <p>Adenosine kinase<br/>Sugar kinase MJ0406</p>                           |
|     | 2c4eA<br>(299) | 20-36 (17),<br>22-38 (17) | 20-36 (17),<br>22-37 (16) | 27-38 (12),<br>53-63 (11) |   |      |      |                     |                    |                                                                                                                                                               |
| 206 | 1dmzA<br>(158) | 628-721 (94)              | 697-721 (25)              | 697-721 (25)              | C | 0.32 | 2.28 | 72.15%<br>(114/158) | 13.29%<br>(21/158) |  <p>Protein (protein kinase SPK1)<br/>Protien kinase SPK1</p>            |
|     | 1g3gA<br>(164) | 94-149 (56)               | 148-149 (2)               | 697-721 (25)              |   |      |      |                     |                    |                                                                                                                                                               |

|     |                |              |              |              |   |      |      |                     |                    |                                                                                                                                                                            |
|-----|----------------|--------------|--------------|--------------|---|------|------|---------------------|--------------------|----------------------------------------------------------------------------------------------------------------------------------------------------------------------------|
| 207 | 1dmzA<br>(158) | 670-730 (61) | 687-730 (44) | 696-714 (19) | C | 0.29 | 2.52 | 84.14%<br>(122/145) | 13.79%<br>(20/145) | 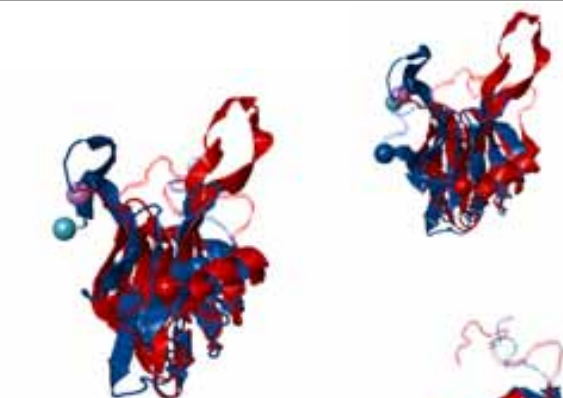 <p>Protein (protein kinase SPK1)<br/>Ubiquitin ligase protein RNF8</p>                  |
|     | 2cswA<br>(145) | 98-145 (48)  | 115-145 (31) | 696-714 (19) |   |      |      |                     |                    |                                                                                                                                                                            |
| 208 | 1dmzA<br>(158) | 687-721 (35) | 697-721 (25) | 697-721 (25) | C | 0.41 | 1.81 | 76.16%<br>(115/151) | 13.91%<br>(21/151) |  <p>Protein (protein kinase SPK1)<br/>Serine/threonine-protein kinase<br/>RAD53</p>     |
|     | 2jqjA<br>(151) | 138-149 (12) | 148-149 (2)  | 697-721 (25) |   |      |      |                     |                    |                                                                                                                                                                            |
| 209 | 1dmzA<br>(158) | 679-730 (52) | 695-730 (36) | 697-701 (5)  | C | 0.28 | 2.34 | 80.14%<br>(113/141) | 17.02%<br>(24/141) |  <p>Protein (protein kinase SPK1)<br/>DNA damage response protein kinase<br/>DUN1</p> |
|     | 2jqjA<br>(141) | 126-159 (34) | 136-159 (24) | 697-701 (5)  |   |      |      |                     |                    |                                                                                                                                                                            |

|     |                |              |              |              |   |      |      |                     |                    |                                                                                                                                                                            |
|-----|----------------|--------------|--------------|--------------|---|------|------|---------------------|--------------------|----------------------------------------------------------------------------------------------------------------------------------------------------------------------------|
| 210 | 1dz3A<br>(123) | 97-112 (16)  | 98-112 (15)  | 101-112 (12) | C | 0.69 | 1.71 | 97.48%<br>(116/119) | 29.41%<br>(35/119) | 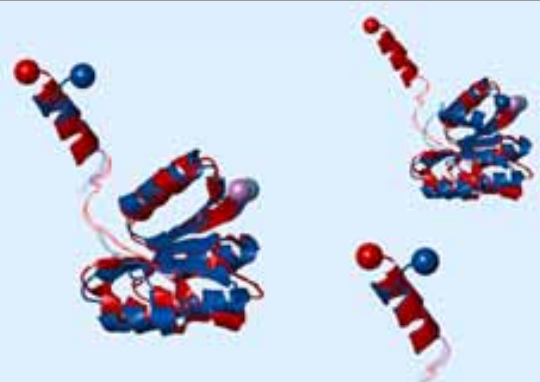 <p>Stage 0 sporulation protein a<br/>Sporulation response regulatory protein</p>        |
|     | InatA<br>(119) | 95-109 (15)  | 96-109 (14)  | 101-112 (12) |   |      |      |                     |                    |                                                                                                                                                                            |
| 211 | 1dz3A<br>(123) | 100-113 (14) | 100-112 (13) | 101-112 (12) | C | 0.70 | 1.67 | 96.67%<br>(116/120) | 29.17%<br>(35/120) |  <p>Stage 0 sporulation protein a<br/>Sporulation initiation phosphotransferase F</p>   |
|     | lpeyC<br>(120) | 98-110 (13)  | 98-109 (12)  | 101-112 (12) |   |      |      |                     |                    |                                                                                                                                                                            |
| 212 | 1dz3A<br>(123) | 96-112 (17)  | 98-112 (15)  | 101-109 (9)  | C | 0.51 | 2.43 | 92.68%<br>(114/123) | 26.83%<br>(33/123) |  <p>Stage 0 sporulation protein a<br/>Sporulation initiation phosphotransferase F</p> |
|     | lpxA<br>(124)  | 94-109 (16)  | 96-109 (14)  | 101-109 (9)  |   |      |      |                     |                    |                                                                                                                                                                            |

|     |                |              |              |             |   |      |      |                     |                    |                                                                                                                                                                                |
|-----|----------------|--------------|--------------|-------------|---|------|------|---------------------|--------------------|--------------------------------------------------------------------------------------------------------------------------------------------------------------------------------|
| 213 | 1dz3A<br>(123) | 105-112 (8)  | 105-112 (8)  | 105-111 (7) | C | 0.26 | 2.50 | 87.80%<br>(108/123) | 9.76%<br>(12/123)  | 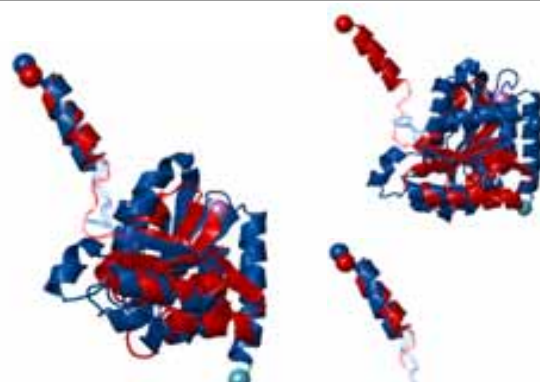 <p>Stage 0 sporulation protein a<br/>Probable hydrogenase nickel<br/>incorporation pro</p>  |
|     | 2hf9A<br>(211) | 198-208 (11) | 198-208 (11) | 105-111 (7) |   |      |      |                     |                    |                                                                                                                                                                                |
| 214 | 1dz3A<br>(123) | 105-110 (6)  | 105-110 (6)  | 105-109 (5) | C | 0.26 | 2.59 | 87.80%<br>(108/123) | 10.57%<br>(13/123) |  <p>Stage 0 sporulation protein a<br/>Probable hydrogenase nickel<br/>incorporation pro</p> |
|     | 2hf9B<br>(209) | 198-203 (6)  | 198-203 (6)  | 105-109 (5) |   |      |      |                     |                    |                                                                                                                                                                                |
| 215 | 1dz3A<br>(123) | 98-112 (15)  | 99-112 (14)  | 104-111 (8) | C | 0.51 | 2.40 | 93.28%<br>(111/119) | 12.61%<br>(15/119) |  <p>Stage 0 sporulation protein a<br/>TWO-component sensor kinase</p>                     |
|     | 2j48A<br>(119) | 720-731 (12) | 721-731 (11) | 104-111 (8) |   |      |      |                     |                    |                                                                                                                                                                                |



|     |                |             |             |             |   |      |      |                      |                     |                                                                                                                                                                               |
|-----|----------------|-------------|-------------|-------------|---|------|------|----------------------|---------------------|-------------------------------------------------------------------------------------------------------------------------------------------------------------------------------|
| 216 | 1dz3A<br>(123) | 95-112 (18) | 107-112 (6) | 104-108 (5) | C | 0.64 | 1.98 | 98.37%<br>(121/123)  | 22.76%<br>(28/123)  | 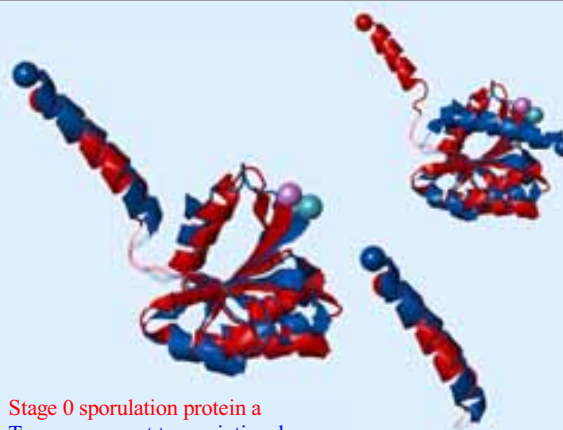 <p>Stage 0 sporulation protein a<br/>Two component transcriptional<br/>regulator, AraC</p> |
|     | 3cu5B<br>(129) | 95-115 (21) | 107-115 (9) | 104-108 (5) |   |      |      |                      |                     |                                                                                                                                                                               |
| 217 | 1dz3A<br>(123) | 105-112 (8) | 105-112 (8) | 106-112 (7) | C | 0.68 | 1.74 | 97.56%<br>(120/123)  | 21.14%<br>(26/123)  |  <p>Stage 0 sporulation protein a<br/>CHEY</p>                                             |
|     | 6chyA<br>(128) | 109-115 (7) | 109-115 (7) | 106-112 (7) |   |      |      |                      |                     |                                                                                                                                                                               |
| 218 | 1f0vA<br>(124) | 111-113 (3) | 112-113 (2) | 112-113 (2) | C | 0.97 | 0.52 | 100.00%<br>(124/124) | 98.39%<br>(122/124) |  <p>Ribonuclease A<br/>Ribonuclease A</p>                                                |
|     | 1a5pA<br>(124) | 111-113 (3) | 112-113 (2) | 112-113 (2) |   |      |      |                      |                     |                                                                                                                                                                               |

|     |                |              |              |             |   |      |      |                      |                     |                                                                                                                              |
|-----|----------------|--------------|--------------|-------------|---|------|------|----------------------|---------------------|------------------------------------------------------------------------------------------------------------------------------|
| 219 | 1f0vA<br>(124) | 111-116 (6)  | 112-113 (2)  | 112-113 (2) | C | 0.98 | 0.45 | 100.00%<br>(124/124) | 99.19%<br>(123/124) |  <p>Ribonuclease A<br/>Ribonuclease A</p>  |
|     | 1a5qA<br>(124) | 111-116 (6)  | 112-113 (2)  | 112-113 (2) |   |      |      |                      |                     |                                                                                                                              |
| 220 | 1f0vA<br>(124) | 112-123 (12) | 112-123 (12) | 112-120 (9) | C | 0.65 | 1.75 | 93.50%<br>(115/123)  | 27.64%<br>(34/123)  |  <p>Ribonuclease A<br/>Angiogenin</p>     |
|     | 1awzA<br>(123) | 109-122 (14) | 109-122 (14) | 112-120 (9) |   |      |      |                      |                     |                                                                                                                              |
| 221 | 1f0vA<br>(124) | 111-113 (3)  | 111-113 (3)  | 112-113 (2) | C | 0.97 | 0.56 | 100.00%<br>(124/124) | 94.35%<br>(117/124) |  <p>Ribonuclease A<br/>Ribonuclease</p> |
|     | 1b6vA<br>(124) | 111-113 (3)  | 111-113 (3)  | 112-113 (2) |   |      |      |                      |                     |                                                                                                                              |

|     |                |             |             |             |   |      |      |                      |                     |                                                                                       |
|-----|----------------|-------------|-------------|-------------|---|------|------|----------------------|---------------------|---------------------------------------------------------------------------------------|
| 222 | 1f0vA<br>(124) | 111-113 (3) | 111-113 (3) | 112-113 (2) | C | 0.95 | 0.66 | 100.00%<br>(124/124) | 99.19%<br>(123/124) | 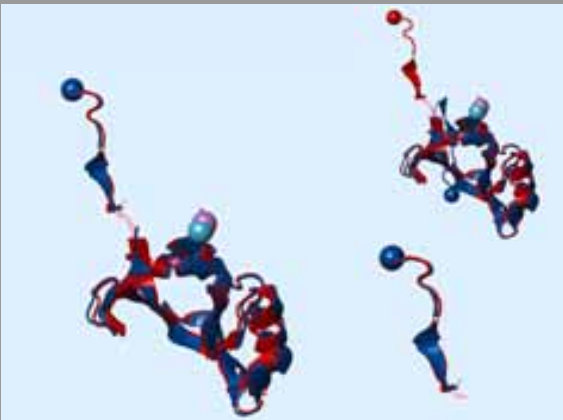    |
|     | 1c8wA<br>(124) | 111-113 (3) | 111-113 (3) | 112-113 (2) |   |      |      |                      |                     |                                                                                       |
| 223 | 1f0vA<br>(124) | 111-113 (3) | 111-113 (3) | 112-113 (2) | C | 0.97 | 0.56 | 100.00%<br>(124/124) | 99.19%<br>(123/124) |    |
|     | 1c9vA<br>(124) | 111-113 (3) | 111-113 (3) | 112-113 (2) |   |      |      |                      |                     |                                                                                       |
| 224 | 1f0vA<br>(124) | 111-113 (3) | 111-113 (3) | 112-113 (2) | C | 0.97 | 0.48 | 100.00%<br>(124/124) | 99.19%<br>(123/124) |  |
|     | 1c9xA<br>(124) | 111-113 (3) | 111-113 (3) | 112-113 (2) |   |      |      |                      |                     |                                                                                       |

|     |                |             |             |             |   |      |      |                      |                     |                                                                                                                           |
|-----|----------------|-------------|-------------|-------------|---|------|------|----------------------|---------------------|---------------------------------------------------------------------------------------------------------------------------|
| 225 | 1f0vA<br>(124) | 111-113 (3) | 111-113 (3) | 112-113 (2) | C | 0.80 | 1.21 | 98.32%<br>(117/119)  | 68.91%<br>(82/119)  | 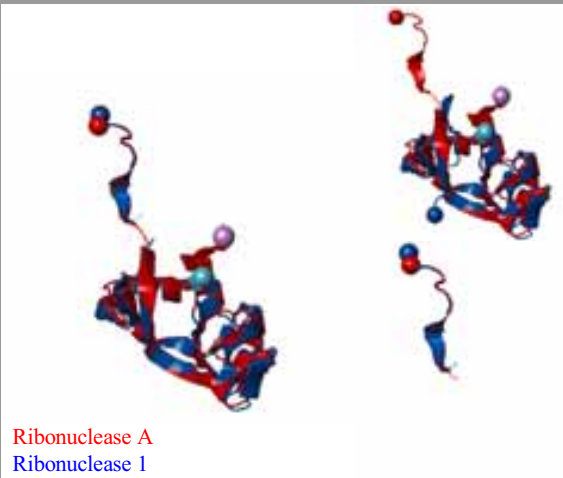<br>Ribonuclease A<br>Ribonuclease 1    |
|     | 1e21A<br>(119) | 111-113 (3) | 111-113 (3) | 112-113 (2) |   |      |      |                      |                     |                                                                                                                           |
| 226 | 1f0vA<br>(124) | 111-113 (3) | 111-113 (3) | 112-113 (2) | C | 0.97 | 0.56 | 100.00%<br>(124/124) | 99.19%<br>(123/124) | <br>Ribonuclease A<br>Ribonuclease A  |
|     | 1eicA<br>(124) | 111-113 (3) | 111-113 (3) | 112-113 (2) |   |      |      |                      |                     |                                                                                                                           |
| 227 | 1f0vA<br>(124) | 111-113 (3) | 112-113 (2) | 112-113 (2) | C | 0.96 | 0.61 | 100.00%<br>(124/124) | 99.19%<br>(123/124) | <br>Ribonuclease A<br>Ribonuclease A |
|     | 1eidA<br>(124) | 111-113 (3) | 112-113 (2) | 112-113 (2) |   |      |      |                      |                     |                                                                                                                           |

|     |                |              |             |             |   |      |      |                      |                     |                                                                                                                        |
|-----|----------------|--------------|-------------|-------------|---|------|------|----------------------|---------------------|------------------------------------------------------------------------------------------------------------------------|
| 228 | 1f0vA<br>(124) | 111-113 (3)  | 111-113 (3) | 112-113 (2) | C | 0.97 | 0.56 | 100.00%<br>(124/124) | 99.19%<br>(123/124) | 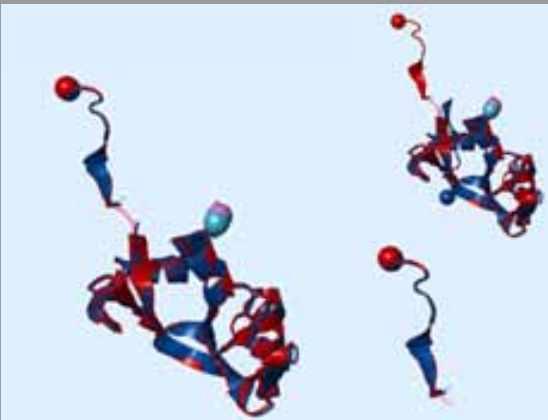<br>Ribonuclease A<br>Ribonuclease A |
|     | 1eieA<br>(124) | 111-113 (3)  | 111-113 (3) | 112-113 (2) |   |      |      |                      |                     |                                                                                                                        |
| 229 | 1f0vA<br>(124) | 112-123 (12) | 112-115 (4) | 112-115 (4) | C | 0.56 | 1.95 | 89.52%<br>(111/124)  | 33.06%<br>(41/124)  | <br>Ribonuclease A<br>Angiogenin    |
|     | 1gioA<br>(125) | 110-120 (11) | 110-111 (2) | 112-115 (4) |   |      |      |                      |                     |                                                                                                                        |
| 230 | 1f0vA<br>(124) | 111-116 (6)  | 111-116 (6) | 112-115 (4) | C | 0.74 | 1.40 | 95.12%<br>(117/123)  | 41.46%<br>(51/123)  | <br>Ribonuclease A<br>Angiogenin  |
|     | 1gv7A<br>(123) | 110-113 (4)  | 110-113 (4) | 112-115 (4) |   |      |      |                      |                     |                                                                                                                        |

|     |                |             |             |             |   |      |      |                      |                     |                                                                                                                           |
|-----|----------------|-------------|-------------|-------------|---|------|------|----------------------|---------------------|---------------------------------------------------------------------------------------------------------------------------|
| 231 | 1f0vA<br>(124) | 111-113 (3) | 111-113 (3) | 112-113 (2) | C | 0.97 | 0.48 | 100.00%<br>(124/124) | 99.19%<br>(123/124) | 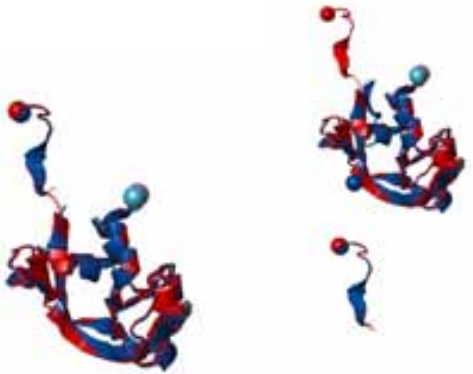<br>Ribonuclease A<br>Ribonuclease A    |
|     | lizpA<br>(124) | 111-113 (3) | 111-113 (3) | 112-113 (2) |   |      |      |                      |                     |                                                                                                                           |
| 232 | 1f0vA<br>(124) | 111-113 (3) | 111-113 (3) | 112-113 (2) | C | 0.97 | 0.52 | 100.00%<br>(124/124) | 99.19%<br>(123/124) | <br>Ribonuclease A<br>Ribonuclease A   |
|     | lizqA<br>(124) | 111-113 (3) | 111-113 (3) | 112-113 (2) |   |      |      |                      |                     |                                                                                                                           |
| 233 | 1f0vA<br>(124) | 111-113 (3) | 111-113 (3) | 112-113 (2) | C | 0.91 | 0.96 | 100.00%<br>(124/124) | 99.19%<br>(123/124) | <br>Ribonuclease A<br>Ribonuclease A |
|     | lizrA<br>(124) | 111-113 (3) | 111-113 (3) | 112-113 (2) |   |      |      |                      |                     |                                                                                                                           |

|     |                |              |             |             |   |      |      |                      |                      |                                                                                                                                    |
|-----|----------------|--------------|-------------|-------------|---|------|------|----------------------|----------------------|------------------------------------------------------------------------------------------------------------------------------------|
| 234 | 1f0vA<br>(124) | 111-113 (3)  | 112-113 (2) | 112-113 (2) | C | 0.77 | 0.71 | 100.00%<br>(101/101) | 100.00%<br>(101/101) | <br>Ribonuclease A<br>Ribonuclease pancreatic    |
|     | 1j80B<br>(101) | 111-113 (3)  | 112-113 (2) | 112-113 (2) |   |      |      |                      |                      |                                                                                                                                    |
| 235 | 1f0vA<br>(124) | 110-116 (7)  | 111-116 (6) | 111-116 (6) | C | 0.91 | 0.73 | 98.39%<br>(122/124)  | 97.58%<br>(121/124)  | <br>Ribonuclease A<br>Pancreatic ribonuclease a |
|     | 1kh8A<br>(125) | 110-116 (7)  | 111-116 (6) | 111-116 (6) |   |      |      |                      |                      |                                                                                                                                    |
| 236 | 1f0vA<br>(124) | 104-123 (20) | 112-119 (8) | 112-116 (5) | C | 0.49 | 1.91 | 89.72%<br>(96/107)   | 23.36%<br>(25/107)   | <br>Ribonuclease A<br>RC-mase4                |
|     | 1kvzA<br>(107) | 86-103 (18)  | 94-99 (6)   | 112-116 (5) |   |      |      |                      |                      |                                                                                                                                    |

|     |                |              |             |             |   |      |      |                      |                      |                                                                                                                                |
|-----|----------------|--------------|-------------|-------------|---|------|------|----------------------|----------------------|--------------------------------------------------------------------------------------------------------------------------------|
| 237 | 1f0vA<br>(124) | 105-119 (15) | 109-116 (8) | 112-115 (4) | C | 0.55 | 1.68 | 92.38%<br>(97/105)   | 24.76%<br>(26/105)   |  <p>Ribonuclease A<br/>P-30 protein</p>      |
|     | 1pu3A<br>(105) | 86-98 (13)   | 90-95 (6)   | 112-115 (4) |   |      |      |                      |                      |                                                                                                                                |
| 238 | 1f0vA<br>(124) | 107-114 (8)  | 108-114 (7) | 113-114 (2) | C | 0.67 | 1.90 | 96.77%<br>(120/124)  | 77.42%<br>(96/124)   |  <p>Ribonuclease A<br/>Ribonuclease</p>     |
|     | 1qwqA<br>(124) | 107-114 (8)  | 108-114 (7) | 113-114 (2) |   |      |      |                      |                      |                                                                                                                                |
| 239 | 1f0vA<br>(124) | 111-113 (3)  | 112-113 (2) | 112-113 (2) | C | 0.97 | 0.47 | 100.00%<br>(123/123) | 100.00%<br>(123/123) |  <p>Ribonuclease A<br/>Ribonuclease A</p> |
|     | 1rasA<br>(123) | 111-113 (3)  | 112-113 (2) | 112-113 (2) |   |      |      |                      |                      |                                                                                                                                |



|     |                |             |             |             |   |      |      |                      |                     |                                                                                                                                         |
|-----|----------------|-------------|-------------|-------------|---|------|------|----------------------|---------------------|-----------------------------------------------------------------------------------------------------------------------------------------|
| 240 | 1f0vA<br>(124) | 112-115 (4) | 112-115 (4) | 112-113 (2) | C | 0.79 | 1.20 | 97.50%<br>(117/120)  | 43.33%<br>(52/120)  | 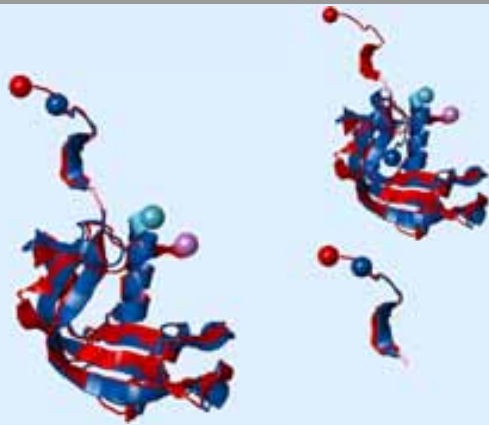 <p>Ribonuclease A<br/>Protein (ribonuclease 4)</p>   |
|     | 1mfA<br>(120)  | 109-112 (4) | 109-112 (4) | 112-113 (2) |   |      |      |                      |                     |                                                                                                                                         |
| 241 | 1f0vA<br>(124) | 108-116 (9) | 111-114 (4) | 112-114 (3) | C | 0.89 | 1.04 | 100.00%<br>(124/124) | 66.94%<br>(83/124)  |  <p>Ribonuclease A<br/>Protein (ribonuclease)</p>    |
|     | 1rraA<br>(124) | 108-116 (9) | 111-114 (4) | 112-114 (3) |   |      |      |                      |                     |                                                                                                                                         |
| 242 | 1f0vA<br>(124) | 111-113 (3) | 111-113 (3) | 112-113 (2) | C | 0.94 | 0.74 | 100.00%<br>(124/124) | 99.19%<br>(123/124) |  <p>Ribonuclease A<br/>Ribonuclease pancreatic</p> |
|     | 1ymnA<br>(124) | 111-113 (3) | 111-113 (3) | 112-113 (2) |   |      |      |                      |                     |                                                                                                                                         |

|     |                |              |             |             |   |      |      |                      |                     |                                                                                       |
|-----|----------------|--------------|-------------|-------------|---|------|------|----------------------|---------------------|---------------------------------------------------------------------------------------|
| 243 | 1f0vA<br>(124) | 111-113 (3)  | 111-113 (3) | 112-113 (2) | C | 0.97 | 0.52 | 100.00%<br>(124/124) | 99.19%<br>(123/124) | 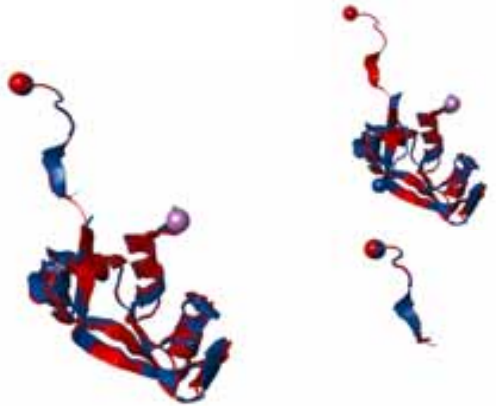    |
|     | lymrA<br>(124) | 111-113 (3)  | 111-113 (3) | 112-113 (2) |   |      |      |                      |                     |                                                                                       |
| 244 | 1f0vA<br>(124) | 111-113 (3)  | 111-113 (3) | 112-113 (2) | C | 0.97 | 0.55 | 100.00%<br>(124/124) | 99.19%<br>(123/124) |    |
|     | lymwA<br>(124) | 111-113 (3)  | 111-113 (3) | 112-113 (2) |   |      |      |                      |                     |                                                                                       |
| 245 | 1f0vA<br>(124) | 104-116 (13) | 110-115 (6) | 112-115 (4) | C | 0.54 | 1.78 | 93.27%<br>(97/104)   | 26.92%<br>(28/104)  |  |
|     | lyv4A<br>(104) | 84-94 (11)   | 90-93 (4)   | 112-115 (4) |   |      |      |                      |                     |                                                                                       |

|     |                |             |             |             |   |      |      |                      |                      |                                                                                                                         |
|-----|----------------|-------------|-------------|-------------|---|------|------|----------------------|----------------------|-------------------------------------------------------------------------------------------------------------------------|
| 246 | 1f0vA<br>(124) | 107-113 (7) | 111-113 (3) | 112-113 (2) | C | 0.88 | 1.13 | 100.00%<br>(124/124) | 100.00%<br>(124/124) | <br>Ribonuclease A<br>Ribonuclease A  |
|     | 2aasA<br>(124) | 107-113 (7) | 111-113 (3) | 112-113 (2) |   |      |      |                      |                      |                                                                                                                         |
| 247 | 1f0vA<br>(124) | 111-113 (3) | 111-113 (3) | 112-113 (2) | C | 0.85 | 1.13 | 100.00%<br>(124/124) | 70.16%<br>(87/124)   | <br>Ribonuclease A<br>Ribonuclease   |
|     | 2e0jA<br>(128) | 111-113 (3) | 111-113 (3) | 112-113 (2) |   |      |      |                      |                      |                                                                                                                         |
| 248 | 1f0vA<br>(124) | 111-113 (3) | 111-113 (3) | 112-113 (2) | C | 0.90 | 0.86 | 100.00%<br>(124/124) | 69.35%<br>(86/124)   | <br>Ribonuclease A<br>Ribonuclease |
|     | 2e0lA<br>(128) | 111-113 (3) | 111-113 (3) | 112-113 (2) |   |      |      |                      |                      |                                                                                                                         |

|     |                |             |             |             |   |      |      |                      |                    |                                                                                       |
|-----|----------------|-------------|-------------|-------------|---|------|------|----------------------|--------------------|---------------------------------------------------------------------------------------|
| 249 | 1f0vA<br>(124) | 111-113 (3) | 111-113 (3) | 112-113 (2) | C | 0.90 | 0.85 | 100.00%<br>(124/124) | 69.35%<br>(86/124) |     |
|     | 2e0mA<br>(128) | 111-113 (3) | 111-113 (3) | 112-113 (2) |   |      |      |                      |                    |                                                                                       |
| 250 | 1f0vA<br>(124) | 112-113 (2) | 112-113 (2) | 112-113 (2) | C | 0.89 | 0.92 | 99.19%<br>(123/124)  | 68.55%<br>(85/124) |    |
|     | 2e0oA<br>(126) | 112-113 (2) | 112-113 (2) | 112-113 (2) |   |      |      |                      |                    |                                                                                       |
| 251 | 1f0vA<br>(124) | 112-113 (2) | 112-113 (2) | 112-113 (2) | C | 0.89 | 1.01 | 100.00%<br>(124/124) | 69.35%<br>(86/124) |  |
|     | 2e0oB<br>(125) | 112-113 (2) | 112-113 (2) | 112-113 (2) |   |      |      |                      |                    |                                                                                       |

|     |                |              |              |             |   |      |      |                     |                    |                                                                                       |
|-----|----------------|--------------|--------------|-------------|---|------|------|---------------------|--------------------|---------------------------------------------------------------------------------------|
| 252 | 1f0vA<br>(124) | 105-123 (19) | 112-123 (12) | 112-116 (5) | C | 0.58 | 1.80 | 90.32%<br>(112/124) | 41.13%<br>(51/124) | 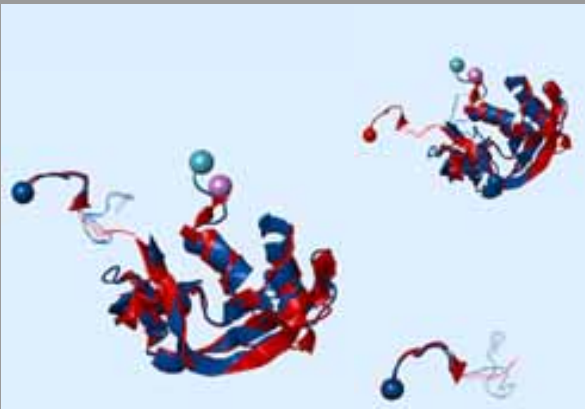    |
|     | 2hkyA<br>(129) | 101-127 (27) | 108-127 (20) | 112-116 (5) |   |      |      |                     |                    |                                                                                       |
| 253 | 1f0vA<br>(124) | 110-116 (7)  | 112-115 (4)  | 112-115 (4) | C | 0.54 | 1.75 | 93.27%<br>(97/104)  | 27.88%<br>(29/104) |    |
|     | 2i5sX<br>(104) | 90-94 (5)    | 92-93 (2)    | 112-115 (4) |   |      |      |                     |                    |                                                                                       |
| 254 | 1f0vA<br>(124) | 109-114 (6)  | 109-114 (6)  | 112-113 (2) | C | 0.76 | 1.56 | 99.19%<br>(123/124) | 69.35%<br>(86/124) |  |
|     | 2k11A<br>(127) | 109-114 (6)  | 109-114 (6)  | 112-113 (2) |   |      |      |                     |                    |                                                                                       |

|     |                |             |             |             |   |      |      |                      |                     |                                                                                                                                         |
|-----|----------------|-------------|-------------|-------------|---|------|------|----------------------|---------------------|-----------------------------------------------------------------------------------------------------------------------------------------|
| 255 | 1f0vA<br>(124) | 111-113 (3) | 112-113 (2) | 112-113 (2) | C | 0.97 | 0.52 | 100.00%<br>(124/124) | 99.19%<br>(123/124) | 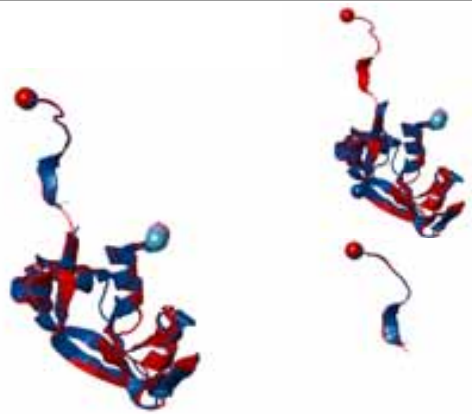 <p>Ribonuclease A<br/>Ribonuclease pancreatic</p>    |
|     | 2nuiA<br>(124) | 111-113 (3) | 112-113 (2) | 112-113 (2) |   |      |      |                      |                     |                                                                                                                                         |
| 256 | 1f0vA<br>(124) | 111-113 (3) | 112-113 (2) | 112-113 (2) | C | 0.95 | 0.65 | 100.00%<br>(124/124) | 98.39%<br>(122/124) |  <p>Ribonuclease A<br/>Ribonuclease pancreatic</p>   |
|     | 2op2A<br>(124) | 111-113 (3) | 112-113 (2) | 112-113 (2) |   |      |      |                      |                     |                                                                                                                                         |
| 257 | 1f0vA<br>(124) | 110-116 (7) | 111-116 (6) | 111-115 (5) | C | 0.55 | 1.63 | 89.91%<br>(98/109)   | 26.61%<br>(29/109)  |  <p>Ribonuclease A<br/>Recombinant amphinase-2</p> |
|     | 2p6zB<br>(109) | 100-104 (5) | 101-104 (4) | 111-115 (5) |   |      |      |                      |                     |                                                                                                                                         |

|     |                |             |             |             |   |      |      |                      |                     |                                                                                       |
|-----|----------------|-------------|-------------|-------------|---|------|------|----------------------|---------------------|---------------------------------------------------------------------------------------|
| 258 | 1f0vA<br>(124) | 111-115 (5) | 111-113 (3) | 112-113 (2) | C | 0.90 | 0.81 | 99.19%<br>(123/124)  | 69.35%<br>(86/124)  |     |
|     | 2q4gX<br>(126) | 111-115 (5) | 111-113 (3) | 112-113 (2) |   |      |      |                      |                     |                                                                                       |
| 259 | 1f0vA<br>(124) | 111-113 (3) | 112-113 (2) | 112-113 (2) | C | 0.97 | 0.49 | 100.00%<br>(124/124) | 99.19%<br>(123/124) |    |
|     | 3dh6A<br>(124) | 111-113 (3) | 112-113 (2) | 112-113 (2) |   |      |      |                      |                     |                                                                                       |
| 260 | 1f0vA<br>(124) | 111-113 (3) | 111-113 (3) | 112-113 (2) | C | 0.97 | 0.50 | 100.00%<br>(124/124) | 99.19%<br>(123/124) |  |
|     | 3di7A<br>(124) | 111-113 (3) | 111-113 (3) | 112-113 (2) |   |      |      |                      |                     |                                                                                       |

|     |                |             |             |             |   |      |      |                      |                     |                                                                                                                                         |
|-----|----------------|-------------|-------------|-------------|---|------|------|----------------------|---------------------|-----------------------------------------------------------------------------------------------------------------------------------------|
| 261 | 1f0vA<br>(124) | 111-113 (3) | 112-113 (2) | 112-113 (2) | C | 0.98 | 0.47 | 100.00%<br>(124/124) | 99.19%<br>(123/124) | 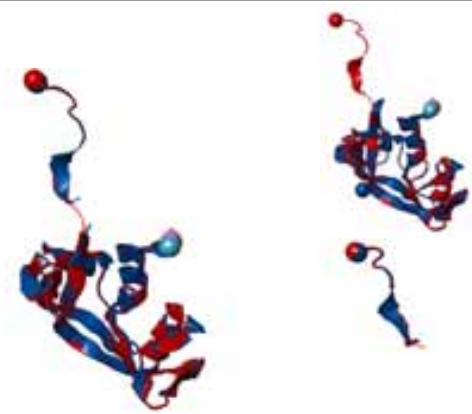 <p>Ribonuclease A<br/>Ribonuclease pancreatic</p>    |
|     | 3di8A<br>(124) | 111-113 (3) | 112-113 (2) | 112-113 (2) |   |      |      |                      |                     |                                                                                                                                         |
| 262 | 1f0vA<br>(124) | 111-113 (3) | 111-113 (3) | 112-113 (2) | C | 0.97 | 0.55 | 100.00%<br>(124/124) | 99.19%<br>(123/124) |  <p>Ribonuclease A<br/>Ribonuclease pancreatic</p>   |
|     | 3di9A<br>(124) | 111-113 (3) | 111-113 (3) | 112-113 (2) |   |      |      |                      |                     |                                                                                                                                         |
| 263 | 1f0vA<br>(124) | 111-113 (3) | 112-113 (2) | 112-113 (2) | C | 0.97 | 0.51 | 100.00%<br>(124/124) | 99.19%<br>(123/124) |  <p>Ribonuclease A<br/>Ribonuclease pancreatic</p> |
|     | 3dibA<br>(124) | 111-113 (3) | 112-113 (2) | 112-113 (2) |   |      |      |                      |                     |                                                                                                                                         |



|     |                |             |             |             |   |      |      |                      |                     |                                                                                       |
|-----|----------------|-------------|-------------|-------------|---|------|------|----------------------|---------------------|---------------------------------------------------------------------------------------|
| 264 | 1f0vA<br>(124) | 111-113 (3) | 111-113 (3) | 112-113 (2) | C | 0.97 | 0.48 | 100.00%<br>(124/124) | 99.19%<br>(123/124) | 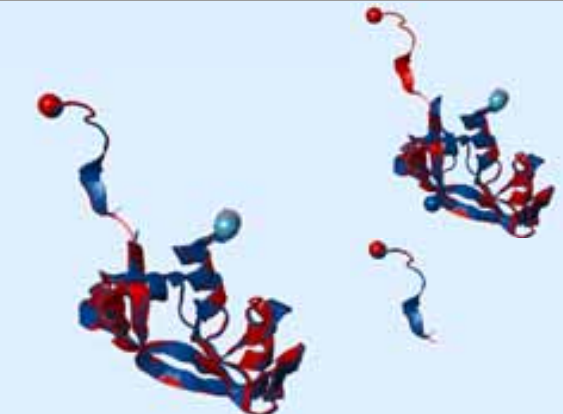    |
|     | 3dicA<br>(124) | 111-113 (3) | 111-113 (3) | 112-113 (2) |   |      |      |                      |                     |                                                                                       |
| 265 | 1f0vA<br>(124) | 111-113 (3) | 112-113 (2) | 112-113 (2) | C | 0.98 | 0.46 | 100.00%<br>(124/124) | 99.19%<br>(123/124) |    |
|     | 3rsdA<br>(124) | 111-113 (3) | 112-113 (2) | 112-113 (2) |   |      |      |                      |                     |                                                                                       |
| 266 | 1f0vA<br>(124) | 111-113 (3) | 111-113 (3) | 112-113 (2) | C | 0.98 | 0.48 | 100.00%<br>(124/124) | 97.58%<br>(121/124) |  |
|     | 3rskA<br>(124) | 111-113 (3) | 111-113 (3) | 112-113 (2) |   |      |      |                      |                     |                                                                                       |

|     |                |             |             |             |   |      |      |                      |                     |                                                                                                                                                       |
|-----|----------------|-------------|-------------|-------------|---|------|------|----------------------|---------------------|-------------------------------------------------------------------------------------------------------------------------------------------------------|
| 267 | 1f0vA<br>(124) | 111-113 (3) | 111-113 (3) | 112-113 (2) | C | 0.96 | 0.58 | 100.00%<br>(124/124) | 99.19%<br>(123/124) | 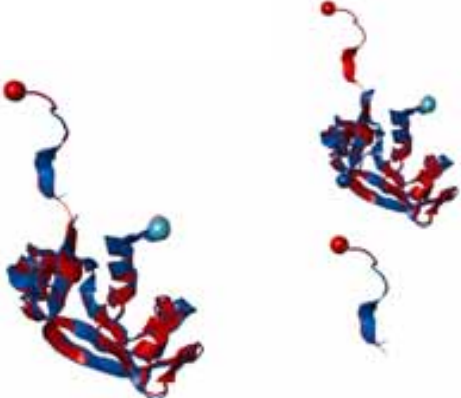 <p>Ribonuclease A<br/>Ribonuclease A</p>                           |
|     | 3rspA<br>(124) | 111-113 (3) | 111-113 (3) | 112-113 (2) |   |      |      |                      |                     |                                                                                                                                                       |
| 268 | 1f0vA<br>(124) | 111-113 (3) | 111-113 (3) | 112-113 (2) | C | 0.96 | 0.59 | 100.00%<br>(124/124) | 99.19%<br>(123/124) |  <p>Ribonuclease A<br/>Ribonuclease A</p>                          |
|     | 4rsdA<br>(124) | 111-113 (3) | 111-113 (3) | 112-113 (2) |   |      |      |                      |                     |                                                                                                                                                       |
| 269 | 1f98A<br>(125) | 10-31 (22)  | 10-23 (14)  | 19-23 (5)   | N | 0.54 | 2.10 | 91.60%<br>(109/119)  | 13.45%<br>(16/119)  |  <p>Photoactive yellow protein<br/>Hypothetical protein yddU</p> |
|     | 1s67L<br>(119) | 17-34 (18)  | 17-26 (10)  | 19-23 (5)   |   |      |      |                      |                     |                                                                                                                                                       |

|     |                |            |            |           |   |      |      |                     |                    |                                                                                                                                                     |
|-----|----------------|------------|------------|-----------|---|------|------|---------------------|--------------------|-----------------------------------------------------------------------------------------------------------------------------------------------------|
| 270 | 1f98A<br>(125) | 22-28 (7)  | 22-23 (2)  | 22-23 (2) | N | 0.37 | 2.23 | 93.04%<br>(107/115) | 13.91%<br>(16/115) |  <p>Photoactive yellow protein<br/>Hypothetical protein yddU</p>  |
|     | 1s67U<br>(115) | 25-31 (7)  | 25-26 (2)  | 22-23 (2) |   |      |      |                     |                    |                                                                                                                                                     |
| 271 | 1f98A<br>(125) | 10-24 (15) | 14-24 (11) | 15-23 (9) | N | 0.55 | 2.00 | 93.81%<br>(106/113) | 14.16%<br>(16/113) |  <p>Photoactive yellow protein<br/>Heme pas sensor protein</p>   |
|     | 1v9zA<br>(113) | 21-27 (7)  | 25-27 (3)  | 15-23 (9) |   |      |      |                     |                    |                                                                                                                                                     |
| 272 | 1f98A<br>(125) | 14-25 (12) | 14-24 (11) | 15-23 (9) | N | 0.55 | 2.04 | 93.86%<br>(107/114) | 14.04%<br>(16/114) |  <p>Photoactive yellow protein<br/>Heme pas sensor protein</p> |
|     | 1vb6A<br>(114) | 25-28 (4)  | 25-27 (3)  | 15-23 (9) |   |      |      |                     |                    |                                                                                                                                                     |

|     |                |                               |                               |                               |   |      |      |                     |                    |                                                                                                                                                                                                    |
|-----|----------------|-------------------------------|-------------------------------|-------------------------------|---|------|------|---------------------|--------------------|----------------------------------------------------------------------------------------------------------------------------------------------------------------------------------------------------|
| 273 | 1fyrA<br>(95)  | 98-127 (30)                   | 114-123 (10)                  | 120-123 (4)                   | C | 0.41 | 1.64 | 93.68%<br>(89/95)   | 26.32%<br>(25/95)  | 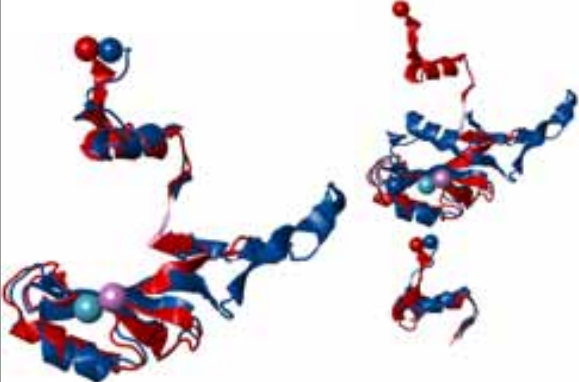 <p>Growth factor receptor-bound protein<br/>2<br/>Crk</p>                                                       |
|     | 1ju5A<br>(109) | 50-96 (47)                    | 83-92 (10)                    | 120-123 (4)                   |   |      |      |                     |                    |                                                                                                                                                                                                    |
| 274 | 1gq9A<br>(241) | 182-198 (17),<br>196-213 (18) | 185-198 (14),<br>196-213 (18) | 130-140 (11),<br>159-168 (10) | M | 0.41 | 2.30 | 88.16%<br>(201/228) | 17.54%<br>(40/228) |  <p>3-deoxy-manno-octulosonate<br/>cytidyltransferase<br/>Cytidine monophospho-<br/>N-acetylneuraminic acid</p> |
|     | 1qwjA<br>(228) | 222-232 (11),<br>230-234 (5)  | 225-232 (8),<br>230-234 (5)   | 130-140 (11),<br>159-168 (10) |   |      |      |                     |                    |                                                                                                                                                                                                    |
| 275 | 1h8xA<br>(125) | 112-126 (15)                  | 112-124 (13)                  | 116-124 (9)                   | N | 0.63 | 1.65 | 91.06%<br>(112/123) | 33.33%<br>(41/123) |  <p>Ribonuclease 1<br/>Angiogenin</p>                                                                         |
|     | 1awzA<br>(123) | 13-26 (14)                    | 13-24 (12)                    | 116-124 (9)                   |   |      |      |                     |                    |                                                                                                                                                                                                    |

|     |                |              |              |              |   |      |      |                     |                     |                                                                                                                         |
|-----|----------------|--------------|--------------|--------------|---|------|------|---------------------|---------------------|-------------------------------------------------------------------------------------------------------------------------|
| 276 | 1h8xA<br>(125) | 117-123 (7)  | 117-123 (7)  | 118-123 (6)  | N | 0.86 | 0.78 | 98.32%<br>(117/119) | 94.12%<br>(112/119) | 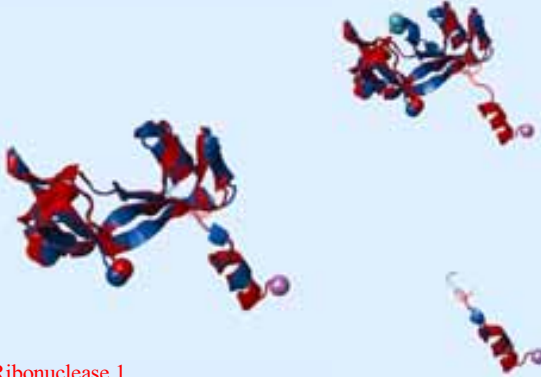<br>Ribonuclease 1<br>Ribonuclease 1 |
|     | 1e21A<br>(119) | 17-23 (7)    | 17-23 (7)    | 118-123 (6)  |   |      |      |                     |                     |                                                                                                                         |
| 277 | 1h8xA<br>(125) | 109-124 (16) | 112-124 (13) | 115-124 (10) | N | 0.58 | 1.90 | 90.40%<br>(113/125) | 30.40%<br>(38/125)  | <br>Ribonuclease 1<br>Angiogenin     |
|     | 1gioA<br>(125) | 11-25 (15)   | 14-25 (12)   | 115-124 (10) |   |      |      |                     |                     |                                                                                                                         |
| 278 | 1h8xA<br>(125) | 111-128 (18) | 111-127 (17) | 116-124 (9)  | N | 0.63 | 1.54 | 90.24%<br>(111/123) | 32.52%<br>(40/123)  | <br>Ribonuclease 1<br>Angiogenin   |
|     | 1k58A<br>(123) | 12-28 (17)   | 12-27 (16)   | 116-124 (9)  |   |      |      |                     |                     |                                                                                                                         |

|     |                |              |              |              |   |      |      |                     |                    |                                                                                                                              |
|-----|----------------|--------------|--------------|--------------|---|------|------|---------------------|--------------------|------------------------------------------------------------------------------------------------------------------------------|
| 279 | 1h8xA<br>(125) | 114-152 (39) | 114-128 (15) | 114-126 (13) | N | 0.51 | 1.94 | 91.59%<br>(98/107)  | 23.36%<br>(25/107) |  <p>Ribonuclease 1<br/>RC-mase4</p>        |
|     | 1kvzA<br>(107) | 13-43 (31)   | 13-22 (10)   | 114-126 (13) |   |      |      |                     |                    |                                                                                                                              |
| 280 | 1h8xA<br>(125) | 114-127 (14) | 114-125 (12) | 118-125 (8)  | N | 0.56 | 1.65 | 93.27%<br>(97/104)  | 24.04%<br>(25/104) |  <p>Ribonuclease 1<br/>P-30 protein</p>   |
|     | 1oncA<br>(104) | 12-20 (9)    | 12-18 (7)    | 118-125 (8)  |   |      |      |                     |                    |                                                                                                                              |
| 281 | 1h8xA<br>(125) | 112-124 (13) | 112-124 (13) | 121-124 (4)  | N | 0.68 | 1.68 | 95.16%<br>(118/124) | 70.97%<br>(88/124) |  <p>Ribonuclease 1<br/>Ribonuclease</p> |
|     | 1qwqA<br>(124) | 12-24 (13)   | 12-24 (13)   | 121-124 (4)  |   |      |      |                     |                    |                                                                                                                              |

|     |                |              |              |              |   |      |      |                     |                    |                                                                                                                                |
|-----|----------------|--------------|--------------|--------------|---|------|------|---------------------|--------------------|--------------------------------------------------------------------------------------------------------------------------------|
| 282 | 1h8xA<br>(125) | 112-127 (16) | 114-125 (12) | 118-125 (8)  | N | 0.56 | 1.67 | 95.10%<br>(97/102)  | 24.51%<br>(25/102) |  <p>Ribonuclease 1<br/>P-30 protein</p>     |
|     | 1yv7A<br>(102) | 10-20 (11)   | 12-18 (7)    | 118-125 (8)  |   |      |      |                     |                    |                                                                                                                                |
| 283 | 1h8xA<br>(125) | 112-125 (14) | 112-125 (14) | 119-125 (7)  | N | 0.78 | 1.32 | 96.77%<br>(120/124) | 70.16%<br>(87/124) |  <p>Ribonuclease 1<br/>Ribonuclease A</p>   |
|     | 2aasA<br>(124) | 12-25 (14)   | 12-25 (14)   | 119-125 (7)  |   |      |      |                     |                    |                                                                                                                                |
| 284 | 1h8xA<br>(125) | 108-125 (18) | 108-125 (18) | 113-125 (13) | N | 0.57 | 1.78 | 88.80%<br>(111/125) | 33.60%<br>(42/125) |  <p>Ribonuclease 1<br/>Ribonuclease 7</p> |
|     | 2hkyA<br>(129) | 11-22 (12)   | 11-22 (12)   | 113-125 (13) |   |      |      |                     |                    |                                                                                                                                |

|     |                |              |              |             |   |      |      |                     |                     |                                                                                                                                      |
|-----|----------------|--------------|--------------|-------------|---|------|------|---------------------|---------------------|--------------------------------------------------------------------------------------------------------------------------------------|
| 285 | 1h8xA<br>(125) | 110-130 (21) | 110-124 (15) | 115-123 (9) | N | 0.73 | 1.58 | 97.60%<br>(122/125) | 89.60%<br>(112/125) | 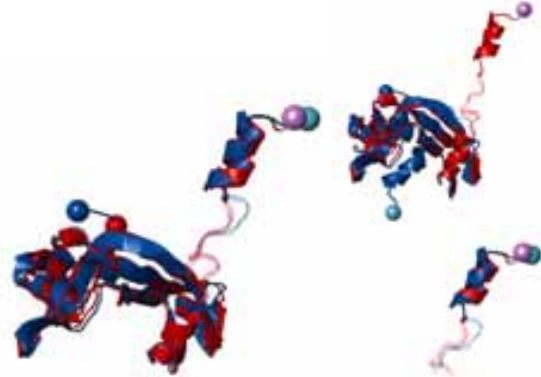 <p>Ribonuclease 1<br/>Pancreatic ribonuclease</p> |
|     | 2k11A<br>(127) | 10-30 (21)   | 10-24 (15)   | 115-123 (9) |   |      |      |                     |                     |                                                                                                                                      |
| 286 | 1jmlA<br>(72)  | 51-56 (6)    | 52-56 (5)    | 52-56 (5)   | C | 0.74 | 1.58 | 97.22%<br>(70/72)   | 87.50%<br>(63/72)   |  <p>Protein L<br/>Protein L</p>                   |
|     | 1k52A<br>(72)  | 51-56 (6)    | 52-56 (5)    | 52-56 (5)   |   |      |      |                     |                     |                                                                                                                                      |
| 287 | 1jmlA<br>(72)  | 51-56 (6)    | 52-56 (5)    | 52-56 (5)   | C | 0.74 | 1.56 | 97.22%<br>(70/72)   | 87.50%<br>(63/72)   |  <p>Protein L<br/>Protein L</p>                 |
|     | 1k53A<br>(72)  | 51-56 (6)    | 52-56 (5)    | 52-56 (5)   |   |      |      |                     |                     |                                                                                                                                      |



|     |               |            |            |           |   |      |      |                    |                   |                                                                                                                 |
|-----|---------------|------------|------------|-----------|---|------|------|--------------------|-------------------|-----------------------------------------------------------------------------------------------------------------|
| 288 | 1jmlA<br>(72) | 35-63 (29) | 35-63 (29) | 51-56 (6) | C | 0.73 | 1.40 | 98.48%<br>(65/66)  | 54.55%<br>(36/66) | <br>Protein L<br>Protein L   |
|     | 1xcqL<br>(66) | 52-81 (30) | 52-81 (30) | 51-56 (6) |   |      |      |                    |                   |                                                                                                                 |
| 289 | 1jmlA<br>(72) | 37-58 (22) | 37-58 (22) | 51-58 (8) | C | 0.73 | 1.28 | 100.00%<br>(62/62) | 66.13%<br>(41/62) | <br>Protein L<br>Protein L   |
|     | 1xcqM<br>(62) | 54-75 (22) | 54-75 (22) | 51-58 (8) |   |      |      |                    |                   |                                                                                                                 |
| 290 | 1jmlA<br>(72) | 38-59 (22) | 38-58 (21) | 51-56 (6) | C | 0.71 | 1.28 | 96.88%<br>(62/64)  | 65.63%<br>(42/64) | <br>Protein L<br>Protein L |
|     | 1xcqN<br>(64) | 55-76 (22) | 55-75 (21) | 51-56 (6) |   |      |      |                    |                   |                                                                                                                 |

|     |                |             |             |             |   |      |      |                      |                     |                                                                                                                           |
|-----|----------------|-------------|-------------|-------------|---|------|------|----------------------|---------------------|---------------------------------------------------------------------------------------------------------------------------|
| 291 | 1jmlA<br>(72)  | 49-63 (15)  | 52-57 (6)   | 52-55 (4)   | C | 0.69 | 1.17 | 92.54%<br>(62/67)    | 55.22%<br>(37/67)   | <br>Protein L<br>Protein L              |
|     | 1xf5M<br>(67)  | 66-81 (16)  | 69-75 (7)   | 52-55 (4)   |   |      |      |                      |                     |                                                                                                                           |
| 292 | 1js0A<br>(124) | 112-113 (2) | 112-113 (2) | 112-113 (2) | C | 0.81 | 0.61 | 100.00%<br>(124/124) | 98.39%<br>(122/124) | <br>Ribonuclease A<br>Ribonuclease A   |
|     | 1a5pA<br>(124) | 112-113 (2) | 112-113 (2) | 112-113 (2) |   |      |      |                      |                     |                                                                                                                           |
| 293 | 1js0A<br>(124) | 112-113 (2) | 112-113 (2) | 112-113 (2) | C | 0.79 | 0.60 | 100.00%<br>(124/124) | 99.19%<br>(123/124) | <br>Ribonuclease A<br>Ribonuclease A |
|     | 1a5qA<br>(124) | 112-113 (2) | 112-113 (2) | 112-113 (2) |   |      |      |                      |                     |                                                                                                                           |

|     |                |              |              |             |   |      |      |                      |                     |                                                                                                                                          |
|-----|----------------|--------------|--------------|-------------|---|------|------|----------------------|---------------------|------------------------------------------------------------------------------------------------------------------------------------------|
| 294 | ljs0A<br>(124) | 107-123 (17) | 111-123 (13) | 112-115 (4) | C | 0.59 | 1.74 | 93.50%<br>(115/123)  | 27.64%<br>(34/123)  | 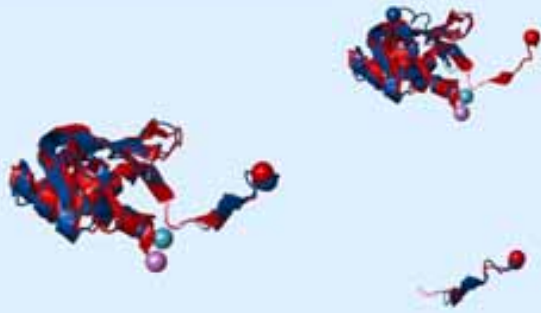 <p>Ribonuclease A<br/>Angiogenin</p>                 |
|     | lawzA<br>(123) | 104-122 (19) | 108-122 (15) | 112-115 (4) |   |      |      |                      |                     |                                                                                                                                          |
| 295 | ljs0A<br>(124) | 111-115 (5)  | 112-113 (2)  | 112-113 (2) | C | 0.80 | 0.68 | 100.00%<br>(124/124) | 94.35%<br>(117/124) |  <p>Ribonuclease A<br/>Ribonuclease</p>               |
|     | 1b6vA<br>(124) | 111-115 (5)  | 112-113 (2)  | 112-113 (2) |   |      |      |                      |                     |                                                                                                                                          |
| 296 | ljs0A<br>(124) | 112-113 (2)  | 112-113 (2)  | 112-113 (2) | C | 0.75 | 0.76 | 100.00%<br>(124/124) | 99.19%<br>(123/124) |  <p>Ribonuclease A<br/>Protein (ribonuclease A)</p> |
|     | 1c8wA<br>(124) | 112-113 (2)  | 112-113 (2)  | 112-113 (2) |   |      |      |                      |                     |                                                                                                                                          |

|     |                |             |             |             |   |      |      |                      |                     |                                                                                       |
|-----|----------------|-------------|-------------|-------------|---|------|------|----------------------|---------------------|---------------------------------------------------------------------------------------|
| 297 | ljs0A<br>(124) | 112-115 (4) | 112-113 (2) | 112-113 (2) | C | 0.78 | 0.66 | 100.00%<br>(124/124) | 99.19%<br>(123/124) | 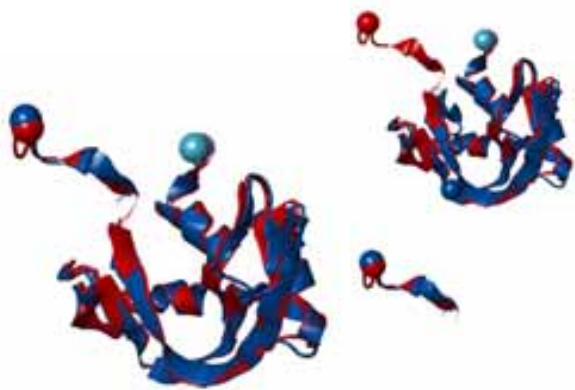    |
|     | 1c9vA<br>(124) | 112-115 (4) | 112-113 (2) | 112-113 (2) |   |      |      |                      |                     |                                                                                       |
| 298 | ljs0A<br>(124) | 112-113 (2) | 112-113 (2) | 112-113 (2) | C | 0.79 | 0.58 | 100.00%<br>(124/124) | 99.19%<br>(123/124) |    |
|     | 1c9xA<br>(124) | 112-113 (2) | 112-113 (2) | 112-113 (2) |   |      |      |                      |                     |                                                                                       |
| 299 | ljs0A<br>(124) | 112-115 (4) | 112-113 (2) | 112-114 (3) | C | 0.71 | 1.29 | 98.32%<br>(117/119)  | 68.91%<br>(82/119)  |  |
|     | 1e21A<br>(119) | 112-115 (4) | 112-113 (2) | 112-114 (3) |   |      |      |                      |                     |                                                                                       |

|     |                |              |             |             |   |      |      |                      |                     |                                                                                                                          |
|-----|----------------|--------------|-------------|-------------|---|------|------|----------------------|---------------------|--------------------------------------------------------------------------------------------------------------------------|
| 300 | ljs0A<br>(124) | 112-115 (4)  | 112-113 (2) | 112-113 (2) | C | 0.75 | 0.76 | 100.00%<br>(124/124) | 99.19%<br>(123/124) | 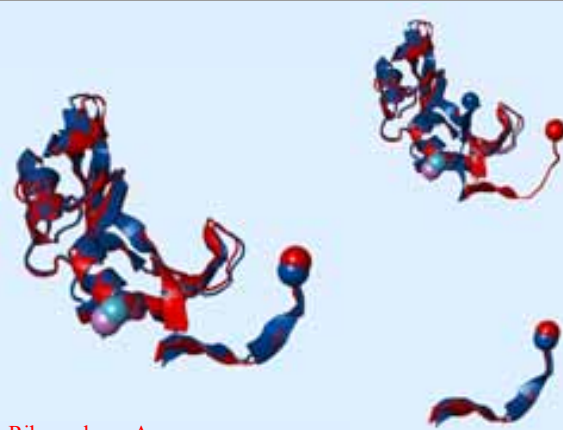<br>Ribonuclease A<br>Ribonuclease A   |
|     | leidA<br>(124) | 112-115 (4)  | 112-113 (2) | 112-113 (2) |   |      |      |                      |                     |                                                                                                                          |
| 301 | ljs0A<br>(124) | 112-115 (4)  | 112-113 (2) | 112-113 (2) | C | 0.74 | 0.73 | 100.00%<br>(124/124) | 99.19%<br>(123/124) | <br>Ribonuclease A<br>Ribonuclease A |
|     | leieA<br>(124) | 112-115 (4)  | 112-113 (2) | 112-113 (2) |   |      |      |                      |                     |                                                                                                                          |
| 302 | ljs0A<br>(124) | 107-123 (17) | 112-115 (4) | 112-115 (4) | C | 0.45 | 1.92 | 88.71%<br>(110/124)  | 32.26%<br>(40/124)  | <br>Ribonuclease A<br>Angiogenin    |
|     | lgioA<br>(125) | 105-120 (16) | 110-111 (2) | 112-115 (4) |   |      |      |                      |                     |                                                                                                                          |

|     |                |             |             |             |   |      |      |                      |                     |                                                                                                                                |
|-----|----------------|-------------|-------------|-------------|---|------|------|----------------------|---------------------|--------------------------------------------------------------------------------------------------------------------------------|
| 303 | ljs0A<br>(124) | 111-116 (6) | 111-115 (5) | 111-115 (5) | C | 0.57 | 1.41 | 95.12%<br>(117/123)  | 41.46%<br>(51/123)  | 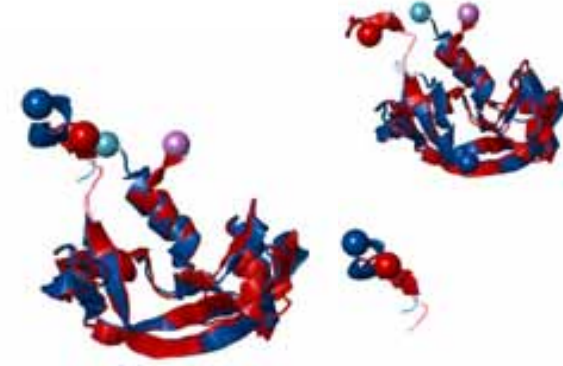 <p>Ribonuclease A<br/>Angiogenin</p>       |
|     | lgv7A<br>(123) | 110-113 (4) | 110-112 (3) | 111-115 (5) |   |      |      |                      |                     |                                                                                                                                |
| 304 | ljs0A<br>(124) | 112-115 (4) | 112-113 (2) | 112-113 (2) | C | 0.80 | 0.61 | 100.00%<br>(124/124) | 99.19%<br>(123/124) |  <p>Ribonuclease A<br/>Ribonuclease A</p>   |
|     | lizpA<br>(124) | 112-115 (4) | 112-113 (2) | 112-113 (2) |   |      |      |                      |                     |                                                                                                                                |
| 305 | ljs0A<br>(124) | 112-115 (4) | 112-113 (2) | 112-113 (2) | C | 0.77 | 0.66 | 100.00%<br>(124/124) | 99.19%<br>(123/124) |  <p>Ribonuclease A<br/>Ribonuclease A</p> |
|     | lizqA<br>(124) | 112-115 (4) | 112-113 (2) | 112-113 (2) |   |      |      |                      |                     |                                                                                                                                |

|     |                |             |             |             |   |      |      |                      |                      |                                                                                                                                  |
|-----|----------------|-------------|-------------|-------------|---|------|------|----------------------|----------------------|----------------------------------------------------------------------------------------------------------------------------------|
| 306 | ljs0A<br>(124) | 112-115 (4) | 112-113 (2) | 112-113 (2) | C | 0.75 | 1.05 | 100.00%<br>(124/124) | 99.19%<br>(123/124)  | 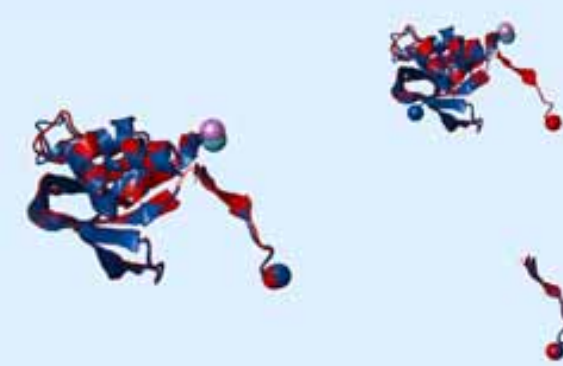<br>Ribonuclease A<br>Ribonuclease A          |
|     | lizrA<br>(124) | 112-115 (4) | 112-113 (2) | 112-113 (2) |   |      |      |                      |                      |                                                                                                                                  |
| 307 | ljs0A<br>(124) | 112-113 (2) | 112-113 (2) | 112-113 (2) | C | 0.65 | 0.70 | 100.00%<br>(101/101) | 100.00%<br>(101/101) | <br>Ribonuclease A<br>Ribonuclease pancreatic |
|     | lj80B<br>(101) | 112-113 (2) | 112-113 (2) | 112-113 (2) |   |      |      |                      |                      |                                                                                                                                  |
| 308 | ljs0A<br>(124) | 111-116 (6) | 111-115 (5) | 112-115 (4) | C | 0.54 | 1.56 | 95.76%<br>(113/118)  | 31.36%<br>(37/118)   | <br>Ribonuclease A<br>Angiogenin            |
|     | 1k5aA<br>(118) | 108-111 (4) | 108-110 (3) | 112-115 (4) |   |      |      |                      |                      |                                                                                                                                  |

|     |                |              |             |             |   |      |      |                     |                     |                                                                                                                                        |
|-----|----------------|--------------|-------------|-------------|---|------|------|---------------------|---------------------|----------------------------------------------------------------------------------------------------------------------------------------|
| 309 | ljs0A<br>(124) | 110-116 (7)  | 110-116 (7) | 111-116 (6) | C | 0.92 | 0.66 | 98.39%<br>(122/124) | 98.39%<br>(122/124) | 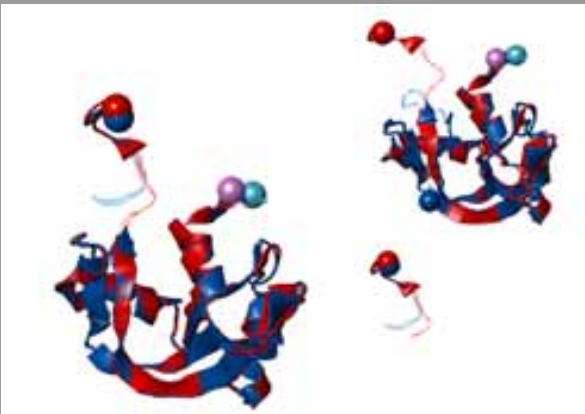 <p>Ribonuclease A<br/>Pancreatic ribonuclease a</p> |
|     | lkh8A<br>(125) | 110-116 (7)  | 110-116 (7) | 111-116 (6) |   |      |      |                     |                     |                                                                                                                                        |
| 310 | ljs0A<br>(124) | 112-119 (8)  | 112-119 (8) | 112-116 (5) | C | 0.41 | 2.08 | 91.59%<br>(98/107)  | 26.17%<br>(28/107)  |  <p>Ribonuclease A<br/>RC-mase4</p>                 |
|     | lkvzA<br>(107) | 94-99 (6)    | 94-99 (6)   | 112-116 (5) |   |      |      |                     |                     |                                                                                                                                        |
| 311 | ljs0A<br>(124) | 106-116 (11) | 110-116 (7) | 111-115 (5) | C | 0.34 | 2.06 | 91.51%<br>(97/106)  | 28.30%<br>(30/106)  |  <p>Ribonuclease A<br/>RC-mase2 ribonuclease</p>  |
|     | lm58A<br>(106) | 87-95 (9)    | 91-95 (5)   | 111-115 (5) |   |      |      |                     |                     |                                                                                                                                        |



|     |                |              |              |             |   |      |      |                     |                    |                                                                                                                                     |
|-----|----------------|--------------|--------------|-------------|---|------|------|---------------------|--------------------|-------------------------------------------------------------------------------------------------------------------------------------|
| 312 | ljs0A<br>(124) | 111-116 (6)  | 111-115 (5)  | 112-115 (4) | C | 0.41 | 1.84 | 92.38%<br>(97/105)  | 23.81%<br>(25/105) | 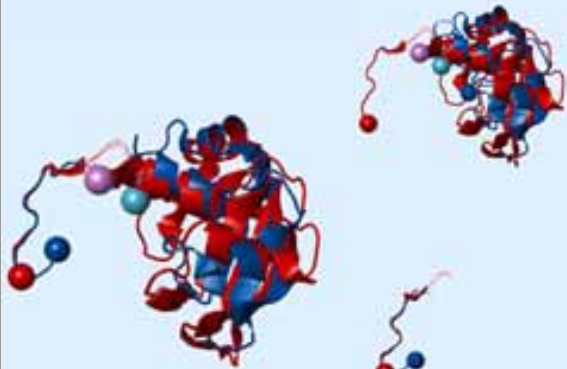 <p>Ribonuclease A<br/>RC-mase6 ribonuclease</p> |
|     | loj8A<br>(105) | 91-94 (4)    | 91-93 (3)    | 112-115 (4) |   |      |      |                     |                    |                                                                                                                                     |
| 313 | ljs0A<br>(124) | 105-123 (19) | 106-118 (13) | 111-115 (5) | C | 0.44 | 1.76 | 92.38%<br>(97/105)  | 26.67%<br>(28/105) |  <p>Ribonuclease A<br/>P-30 protein</p>          |
|     | lpu3A<br>(105) | 86-102 (17)  | 87-97 (11)   | 111-115 (5) |   |      |      |                     |                    |                                                                                                                                     |
| 314 | ljs0A<br>(124) | 107-113 (7)  | 108-113 (6)  | 111-113 (3) | C | 0.55 | 1.92 | 95.97%<br>(119/124) | 75.81%<br>(94/124) |  <p>Ribonuclease A<br/>Ribonuclease</p>        |
|     | lqwqA<br>(124) | 107-113 (7)  | 108-113 (6)  | 111-113 (3) |   |      |      |                     |                    |                                                                                                                                     |

|     |                |             |             |             |   |      |      |                      |                      |                                                                                                                                        |
|-----|----------------|-------------|-------------|-------------|---|------|------|----------------------|----------------------|----------------------------------------------------------------------------------------------------------------------------------------|
| 315 | ljs0A<br>(124) | 112-115 (4) | 112-115 (4) | 112-113 (2) | C | 0.79 | 0.54 | 100.00%<br>(123/123) | 100.00%<br>(123/123) | 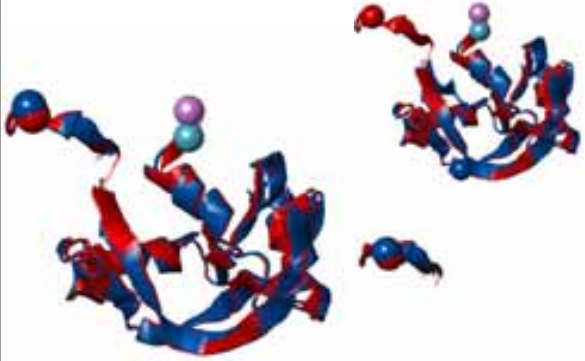 <p>Ribonuclease A<br/>Ribonuclease A</p>           |
|     | lrasA<br>(123) | 112-115 (4) | 112-115 (4) | 112-113 (2) |   |      |      |                      |                      |                                                                                                                                        |
| 316 | ljs0A<br>(124) | 112-113 (2) | 112-113 (2) | 112-113 (2) | C | 0.55 | 1.31 | 97.50%<br>(117/120)  | 43.33%<br>(52/120)   |  <p>Ribonuclease A<br/>Protein (ribonuclease 4)</p> |
|     | lrfA<br>(120)  | 109-110 (2) | 109-110 (2) | 112-113 (2) |   |      |      |                      |                      |                                                                                                                                        |
| 317 | ljs0A<br>(124) | 107-115 (9) | 112-115 (4) | 112-115 (4) | C | 0.76 | 1.07 | 100.00%<br>(124/124) | 66.94%<br>(83/124)   |  <p>Ribonuclease A<br/>Protein (ribonuclease)</p> |
|     | lrraA<br>(124) | 107-115 (9) | 112-115 (4) | 112-115 (4) |   |      |      |                      |                      |                                                                                                                                        |

|     |                |             |             |             |   |      |      |                      |                     |                                                                                                                                         |
|-----|----------------|-------------|-------------|-------------|---|------|------|----------------------|---------------------|-----------------------------------------------------------------------------------------------------------------------------------------|
| 318 | ljs0A<br>(124) | 112-115 (4) | 112-113 (2) | 112-113 (2) | C | 0.77 | 0.88 | 100.00%<br>(124/124) | 99.19%<br>(123/124) | 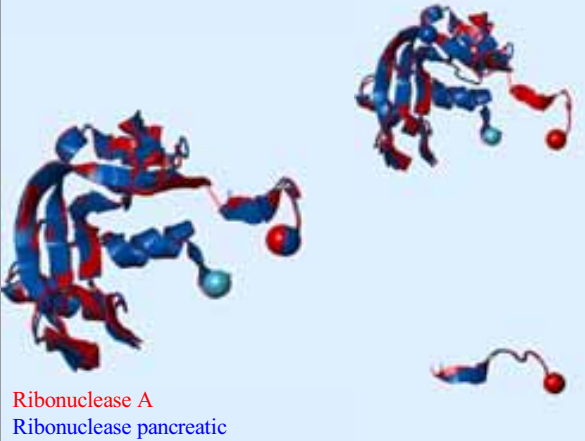 <p>Ribonuclease A<br/>Ribonuclease pancreatic</p>   |
|     | lymrA<br>(124) | 112-115 (4) | 112-113 (2) | 112-113 (2) |   |      |      |                      |                     |                                                                                                                                         |
| 319 | ljs0A<br>(124) | 111-115 (5) | 112-113 (2) | 112-113 (2) | C | 0.79 | 0.61 | 100.00%<br>(124/124) | 99.19%<br>(123/124) |  <p>Ribonuclease A<br/>Ribonuclease pancreatic</p>  |
|     | lymrA<br>(124) | 111-115 (5) | 112-113 (2) | 112-113 (2) |   |      |      |                      |                     |                                                                                                                                         |
| 320 | ljs0A<br>(124) | 111-115 (5) | 112-113 (2) | 112-113 (2) | C | 0.80 | 0.67 | 100.00%<br>(124/124) | 99.19%<br>(123/124) |  <p>Ribonuclease A<br/>Ribonuclease pancreatic</p> |
|     | lymwA<br>(124) | 111-115 (5) | 112-113 (2) | 112-113 (2) |   |      |      |                      |                     |                                                                                                                                         |

|     |                |              |             |             |   |      |      |                      |                      |                                                                                                                              |
|-----|----------------|--------------|-------------|-------------|---|------|------|----------------------|----------------------|------------------------------------------------------------------------------------------------------------------------------|
| 321 | ljs0A<br>(124) | 110-116 (7)  | 110-115 (6) | 111-115 (5) | C | 0.44 | 1.83 | 95.10%<br>(97/102)   | 28.43%<br>(29/102)   | 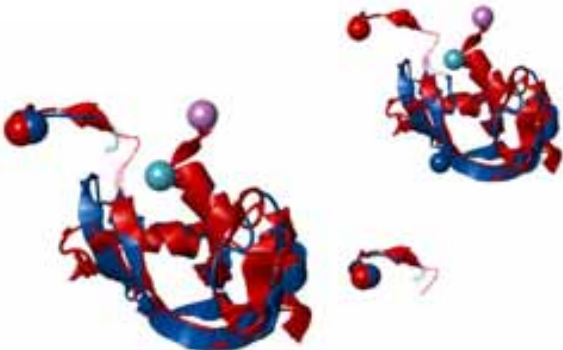 <p>Ribonuclease A<br/>P-30 protein</p>   |
|     | lyv7A<br>(102) | 90-94 (5)    | 90-93 (4)   | 111-115 (5) |   |      |      |                      |                      |                                                                                                                              |
| 322 | ljs0A<br>(124) | 107-123 (17) | 111-113 (3) | 112-113 (2) | C | 0.67 | 1.27 | 100.00%<br>(124/124) | 100.00%<br>(124/124) |  <p>Ribonuclease A<br/>Ribonuclease A</p> |
|     | 2aasA<br>(124) | 107-123 (17) | 111-113 (3) | 112-113 (2) |   |      |      |                      |                      |                                                                                                                              |
| 323 | ljs0A<br>(124) | 112-113 (2)  | 112-113 (2) | 112-113 (2) | C | 0.65 | 1.08 | 99.19%<br>(123/124)  | 68.55%<br>(85/124)   |  <p>Ribonuclease A<br/>Ribonuclease</p> |
|     | 2e0jA<br>(128) | 112-113 (2)  | 112-113 (2) | 112-113 (2) |   |      |      |                      |                      |                                                                                                                              |

|     |                |             |             |             |   |      |      |                      |                    |                                                                                       |
|-----|----------------|-------------|-------------|-------------|---|------|------|----------------------|--------------------|---------------------------------------------------------------------------------------|
| 324 | 1js0A<br>(124) | 112-113 (2) | 112-113 (2) | 112-113 (2) | C | 0.78 | 0.88 | 100.00%<br>(124/124) | 69.35%<br>(86/124) |     |
|     | 2e0lA<br>(128) | 112-113 (2) | 112-113 (2) | 112-113 (2) |   |      |      |                      |                    |                                                                                       |
| 325 | 1js0A<br>(124) | 112-113 (2) | 112-113 (2) | 112-113 (2) | C | 0.74 | 0.88 | 100.00%<br>(124/124) | 69.35%<br>(86/124) |    |
|     | 2e0mA<br>(128) | 112-113 (2) | 112-113 (2) | 112-113 (2) |   |      |      |                      |                    |                                                                                       |
| 326 | 1js0A<br>(124) | 112-113 (2) | 112-113 (2) | 112-113 (2) | C | 0.70 | 1.02 | 99.19%<br>(123/124)  | 68.55%<br>(85/124) |  |
|     | 2e0oA<br>(126) | 112-113 (2) | 112-113 (2) | 112-113 (2) |   |      |      |                      |                    |                                                                                       |

|     |                |              |              |             |   |      |      |                      |                    |                                                                                                                                                                             |
|-----|----------------|--------------|--------------|-------------|---|------|------|----------------------|--------------------|-----------------------------------------------------------------------------------------------------------------------------------------------------------------------------|
| 327 | 1js0A<br>(124) | 112-115 (4)  | 112-113 (2)  | 112-113 (2) | C | 0.70 | 1.12 | 100.00%<br>(124/124) | 69.35%<br>(86/124) | 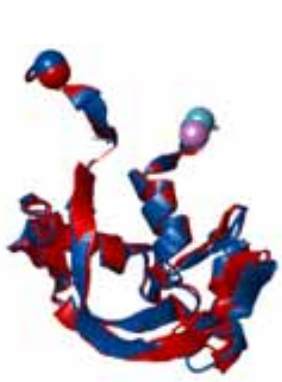      |
|     | 2e0oB<br>(125) | 112-115 (4)  | 112-113 (2)  | 112-113 (2) |   |      |      |                      |                    |                                                                                                                                                                             |
| 328 | 1js0A<br>(124) | 112-119 (8)  | 113-119 (7)  | 112-116 (5) | C | 0.51 | 1.86 | 90.32%<br>(112/124)  | 41.94%<br>(52/124) |       |
|     | 2hkyA<br>(129) | 108-123 (16) | 109-123 (15) | 112-116 (5) |   |      |      |                      |                    |                                                                                                                                                                             |
| 329 | 1js0A<br>(124) | 109-123 (15) | 112-115 (4)  | 112-115 (4) | C | 0.68 | 1.63 | 99.19%<br>(123/124)  | 69.35%<br>(86/124) |   |
|     | 2k11A<br>(127) | 109-123 (15) | 112-115 (4)  | 112-115 (4) |   |      |      |                      |                    |                                                                                                                                                                             |

|     |                |             |             |             |   |      |      |                      |                     |                                                                                       |
|-----|----------------|-------------|-------------|-------------|---|------|------|----------------------|---------------------|---------------------------------------------------------------------------------------|
| 330 | 1js0A<br>(124) | 112-113 (2) | 112-113 (2) | 112-113 (2) | C | 0.79 | 0.59 | 100.00%<br>(124/124) | 99.19%<br>(123/124) | 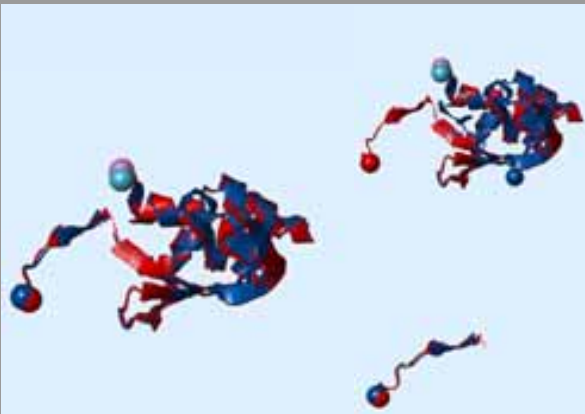    |
|     | 2nuiA<br>(124) | 112-113 (2) | 112-113 (2) | 112-113 (2) |   |      |      |                      |                     |                                                                                       |
| 331 | 1js0A<br>(124) | 112-113 (2) | 112-113 (2) | 112-113 (2) | C | 0.76 | 0.79 | 100.00%<br>(124/124) | 98.39%<br>(122/124) |    |
|     | 2op2A<br>(124) | 112-113 (2) | 112-113 (2) | 112-113 (2) |   |      |      |                      |                     |                                                                                       |
| 332 | 1js0A<br>(124) | 112-119 (8) | 112-113 (2) | 112-113 (2) | C | 0.74 | 0.84 | 99.19%<br>(123/124)  | 69.35%<br>(86/124)  |  |
|     | 2q4gX<br>(126) | 112-119 (8) | 112-113 (2) | 112-113 (2) |   |      |      |                      |                     |                                                                                       |

|     |                |             |             |             |   |      |      |                      |                     |                                                                                       |
|-----|----------------|-------------|-------------|-------------|---|------|------|----------------------|---------------------|---------------------------------------------------------------------------------------|
| 333 | 1js0A<br>(124) | 112-113 (2) | 112-113 (2) | 112-113 (2) | C | 0.78 | 0.62 | 100.00%<br>(124/124) | 99.19%<br>(123/124) |     |
|     | 3dh6A<br>(124) | 112-113 (2) | 112-113 (2) | 112-113 (2) |   |      |      |                      |                     |                                                                                       |
| 334 | 1js0A<br>(124) | 112-115 (4) | 112-113 (2) | 112-113 (2) | C | 0.76 | 0.64 | 100.00%<br>(124/124) | 99.19%<br>(123/124) |    |
|     | 3di7A<br>(124) | 112-115 (4) | 112-113 (2) | 112-113 (2) |   |      |      |                      |                     |                                                                                       |
| 335 | 1js0A<br>(124) | 112-115 (4) | 112-113 (2) | 112-113 (2) | C | 0.77 | 0.59 | 100.00%<br>(124/124) | 99.19%<br>(123/124) |  |
|     | 3di8A<br>(124) | 112-115 (4) | 112-113 (2) | 112-113 (2) |   |      |      |                      |                     |                                                                                       |



|     |                |             |             |             |   |      |      |                      |                     |                                                                                       |
|-----|----------------|-------------|-------------|-------------|---|------|------|----------------------|---------------------|---------------------------------------------------------------------------------------|
| 336 | 1js0A<br>(124) | 112-115 (4) | 112-113 (2) | 112-113 (2) | C | 0.76 | 0.71 | 100.00%<br>(124/124) | 99.19%<br>(123/124) |    |
|     | 3di9A<br>(124) | 112-115 (4) | 112-113 (2) | 112-113 (2) |   |      |      |                      |                     |                                                                                       |
| 337 | 1js0A<br>(124) | 112-115 (4) | 112-113 (2) | 112-113 (2) | C | 0.79 | 0.63 | 100.00%<br>(124/124) | 99.19%<br>(123/124) |    |
|     | 3dibA<br>(124) | 112-115 (4) | 112-113 (2) | 112-113 (2) |   |      |      |                      |                     |                                                                                       |
| 338 | 1js0A<br>(124) | 112-115 (4) | 112-113 (2) | 112-113 (2) | C | 0.76 | 0.61 | 100.00%<br>(124/124) | 99.19%<br>(123/124) |  |
|     | 3dicA<br>(124) | 112-115 (4) | 112-113 (2) | 112-113 (2) |   |      |      |                      |                     |                                                                                       |

|     |                |             |             |             |   |      |      |                      |                     |                                                                                       |
|-----|----------------|-------------|-------------|-------------|---|------|------|----------------------|---------------------|---------------------------------------------------------------------------------------|
| 339 | 1js0A<br>(124) | 112-115 (4) | 112-113 (2) | 112-113 (2) | C | 0.78 | 0.62 | 100.00%<br>(124/124) | 99.19%<br>(123/124) |     |
|     | 3rsdA<br>(124) | 112-115 (4) | 112-113 (2) | 112-113 (2) |   |      |      |                      |                     |                                                                                       |
| 340 | 1js0A<br>(124) | 112-113 (2) | 112-113 (2) | 112-113 (2) | C | 0.80 | 0.53 | 100.00%<br>(124/124) | 97.58%<br>(121/124) |    |
|     | 3rskA<br>(124) | 112-113 (2) | 112-113 (2) | 112-113 (2) |   |      |      |                      |                     |                                                                                       |
| 341 | 1js0A<br>(124) | 112-115 (4) | 112-113 (2) | 112-113 (2) | C | 0.77 | 0.69 | 100.00%<br>(124/124) | 99.19%<br>(123/124) |  |
|     | 3rspA<br>(124) | 112-115 (4) | 112-113 (2) | 112-113 (2) |   |      |      |                      |                     |                                                                                       |

|     |                |               |              |             |   |      |      |                      |                     |                                                                                                                                                                             |
|-----|----------------|---------------|--------------|-------------|---|------|------|----------------------|---------------------|-----------------------------------------------------------------------------------------------------------------------------------------------------------------------------|
| 342 | ljs0A<br>(124) | 112-113 (2)   | 112-113 (2)  | 112-113 (2) | C | 0.76 | 0.72 | 100.00%<br>(124/124) | 99.19%<br>(123/124) |       |
|     | 4rsdA<br>(124) | 112-113 (2)   | 112-113 (2)  | 112-113 (2) |   |      |      |                      |                     |                                                                                                                                                                             |
| 343 | llgqA<br>(112) | 14-123 (110)  | 65-93 (29)   | 85-87 (3)   | C | 0.38 | 1.87 | 92.86%<br>(104/112)  | 19.64%<br>(22/112)  |       |
|     | lqu5A<br>(182) | 575-698 (124) | 627-668 (42) | 85-87 (3)   |   |      |      |                      |                     |                                                                                                                                                                             |
| 344 | llr5A<br>(160) | 122-159 (38)  | 133-139 (7)  | 133-136 (4) | C | 0.37 | 2.32 | 87.50%<br>(140/160)  | 10.63%<br>(17/160)  |   |
|     | ldgwA<br>(178) | 162-222 (61)  | 177-203 (27) | 133-136 (4) |   |      |      |                      |                     |                                                                                                                                                                             |

|     |                |            |            |           |   |      |      |                     |                   |                                                                                                                                                                           |
|-----|----------------|------------|------------|-----------|---|------|------|---------------------|-------------------|---------------------------------------------------------------------------------------------------------------------------------------------------------------------------|
| 345 | 1lr5A<br>(160) | 11-41 (31) | 12-41 (30) | 37-41 (5) | N | 0.34 | 2.39 | 80.63%<br>(129/160) | 8.13%<br>(13/160) | 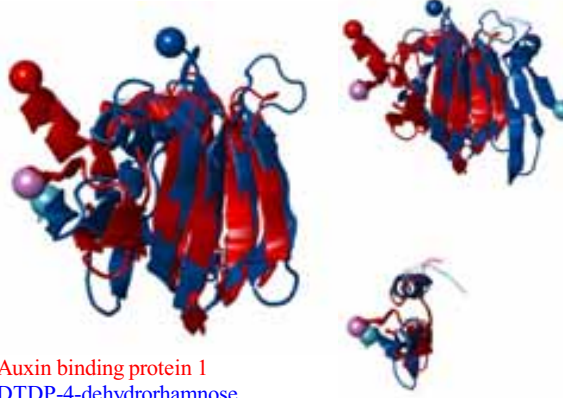 <p>Auxin binding protein 1<br/>DTDP-4-dehydrorhamnose<br/>3,5-epimerase</p>           |
|     | 1dzzA<br>(183) | 14-47 (34) | 15-47 (33) | 37-41 (5) |   |      |      |                     |                   |                                                                                                                                                                           |
| 346 | 1lr5A<br>(160) | 35-41 (7)  | 36-41 (6)  | 36-41 (6) | N | 0.35 | 2.30 | 80.00%<br>(128/160) | 8.13%<br>(13/160) |  <p>Auxin binding protein 1<br/>DTDP-6-deoxy-D-XYLO-4-hexulose<br/>3,5-epimerase</p>   |
|     | 1ep0A<br>(183) | 37-48 (12) | 38-48 (11) | 36-41 (6) |   |      |      |                     |                   |                                                                                                                                                                           |
| 347 | 1lr5A<br>(160) | 35-41 (7)  | 36-40 (5)  | 36-40 (5) | N | 0.30 | 2.45 | 80.63%<br>(129/160) | 4.38%<br>(7/160)  |  <p>Auxin binding protein 1<br/>DTDP-6-deoxy-D-xylo-4-hexulose<br/>3,5-epimerase</p> |
|     | 1nxmA<br>(194) | 48-60 (13) | 49-59 (11) | 36-40 (5) |   |      |      |                     |                   |                                                                                                                                                                           |

|     |                |            |            |           |   |      |      |                     |                   |                                                                                                                                                                   |
|-----|----------------|------------|------------|-----------|---|------|------|---------------------|-------------------|-------------------------------------------------------------------------------------------------------------------------------------------------------------------|
| 348 | 1lr5A<br>(160) | 5-44 (40)  | 29-41 (13) | 36-41 (6) | N | 0.32 | 2.43 | 82.50%<br>(132/160) | 9.38%<br>(15/160) | 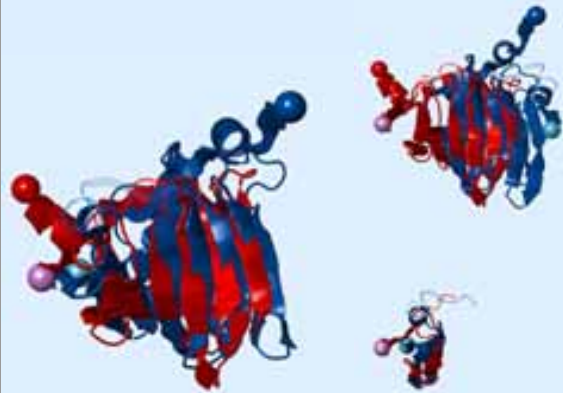 <p>Auxin binding protein 1<br/>PCZA361.16</p>                                  |
|     | 1wa4A<br>(205) | 3-50 (48)  | 28-47 (20) | 36-41 (6) |   |      |      |                     |                   |                                                                                                                                                                   |
| 349 | 1lr5A<br>(160) | 36-41 (6)  | 36-40 (5)  | 36-40 (5) | N | 0.32 | 2.53 | 81.88%<br>(131/160) | 5.63%<br>(9/160)  |  <p>Auxin binding protein 1<br/>DTDP-4-dehydrorhamnose<br/>3,5-epimerase</p>   |
|     | 2ix1A<br>(196) | 46-60 (15) | 46-59 (14) | 36-40 (5) |   |      |      |                     |                   |                                                                                                                                                                   |
| 350 | 1lr5A<br>(160) | 36-41 (6)  | 36-40 (5)  | 36-40 (5) | N | 0.32 | 2.58 | 82.50%<br>(132/160) | 5.63%<br>(9/160)  |  <p>Auxin binding protein 1<br/>DTDP-4-dehydrorhamnose<br/>3,5-epimerase</p> |
|     | 2ix1B<br>(195) | 46-60 (15) | 46-59 (14) | 36-40 (5) |   |      |      |                     |                   |                                                                                                                                                                   |

|     |                |              |              |              |   |      |      |                     |                    |                                                                                                                                                                       |
|-----|----------------|--------------|--------------|--------------|---|------|------|---------------------|--------------------|-----------------------------------------------------------------------------------------------------------------------------------------------------------------------|
| 351 | 1lr5A<br>(160) | 36-41 (6)    | 36-40 (5)    | 36-40 (5)    | N | 0.29 | 2.81 | 82.50%<br>(132/160) | 3.75%<br>(6/160)   | 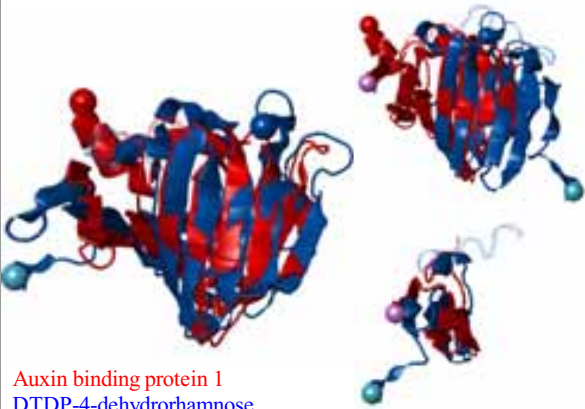 <p>Auxin binding protein 1<br/>DTDP-4-dehydrorhamnose<br/>3,5-epimerase</p>       |
|     | 2ix1C<br>(197) | 46-60 (15)   | 46-59 (14)   | 36-40 (5)    |   |      |      |                     |                    |                                                                                                                                                                       |
| 352 | 1lr5A<br>(160) | 1-41 (41)    | 29-41 (13)   | 39-41 (3)    | N | 0.32 | 2.38 | 88.06%<br>(118/134) | 11.94%<br>(16/134) |  <p>Auxin binding protein 1<br/>DTDP-6-deoxy-3,4-keto-hexulose<br/>isomerase</p>   |
|     | 2pa7B<br>(134) | 2-32 (31)    | 20-32 (13)   | 39-41 (3)    |   |      |      |                     |                    |                                                                                                                                                                       |
| 353 | 1lr5A<br>(160) | 122-153 (32) | 132-153 (22) | 133-153 (21) | C | 0.27 | 2.04 | 70.15%<br>(94/134)  | 11.94%<br>(16/134) |  <p>Auxin binding protein 1<br/>DTDP-6-deoxy-3,4-keto-hexulose<br/>isomerase</p> |
|     | 2pa7B<br>(134) | 109-123 (15) | 121-123 (3)  | 133-153 (21) |   |      |      |                     |                    |                                                                                                                                                                       |

|     |                |              |              |              |   |      |      |                     |                    |                                                                                                                                                                       |
|-----|----------------|--------------|--------------|--------------|---|------|------|---------------------|--------------------|-----------------------------------------------------------------------------------------------------------------------------------------------------------------------|
| 354 | 1lr5A<br>(160) | 18-63 (46)   | 29-63 (35)   | 39-41 (3)    | N | 0.38 | 2.39 | 87.50%<br>(119/136) | 11.03%<br>(15/136) |  <p>Auxin binding protein 1<br/>DTDP-6-deoxy-3,4-keto-hexulose<br/>isomerase</p>    |
|     | 2paeA<br>(136) | 11-56 (46)   | 20-56 (37)   | 39-41 (3)    |   |      |      |                     |                    |                                                                                                                                                                       |
| 355 | 1lr5A<br>(160) | 109-154 (46) | 128-154 (27) | 133-153 (21) | C | 0.26 | 2.02 | 69.12%<br>(94/136)  | 11.03%<br>(15/136) |  <p>Auxin binding protein 1<br/>DTDP-6-deoxy-3,4-keto-hexulose<br/>isomerase</p>  |
|     | 2paeA<br>(136) | 98-124 (27)  | 115-124 (10) | 133-153 (21) |   |      |      |                     |                    |                                                                                                                                                                       |
| 356 | 1lr5A<br>(160) | 18-41 (24)   | 18-41 (24)   | 39-41 (3)    | N | 0.32 | 2.41 | 88.06%<br>(118/134) | 11.19%<br>(15/134) |  <p>Auxin binding protein 1<br/>DTDP-6-deoxy-3,4-keto-hexulose<br/>isomerase</p> |
|     | 2paeB<br>(134) | 11-32 (22)   | 11-32 (22)   | 39-41 (3)    |   |      |      |                     |                    |                                                                                                                                                                       |

|     |                |              |              |              |   |      |      |                     |                    |                                                                                                                                                                       |
|-----|----------------|--------------|--------------|--------------|---|------|------|---------------------|--------------------|-----------------------------------------------------------------------------------------------------------------------------------------------------------------------|
| 357 | 1lr5A<br>(160) | 124-153 (30) | 132-153 (22) | 133-153 (21) | C | 0.27 | 2.04 | 70.15%<br>(94/134)  | 11.19%<br>(15/134) | 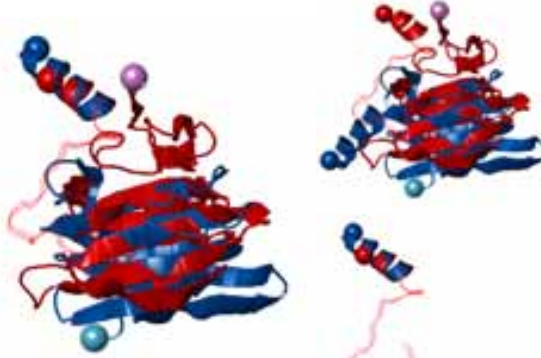 <p>Auxin binding protein 1<br/>DTDP-6-deoxy-3,4-keto-hexulose<br/>isomerase</p>   |
|     | 2paeB<br>(134) | 111-123 (13) | 121-123 (3)  | 133-153 (21) |   |      |      |                     |                    |                                                                                                                                                                       |
| 358 | 1lr5A<br>(160) | 29-41 (13)   | 29-41 (13)   | 39-41 (3)    | N | 0.38 | 2.33 | 87.41%<br>(118/135) | 11.11%<br>(15/135) |  <p>Auxin binding protein 1<br/>DTDP-6-deoxy-3,4-keto-hexulose<br/>isomerase</p>   |
|     | 2pakA<br>(135) | 20-32 (13)   | 20-32 (13)   | 39-41 (3)    |   |      |      |                     |                    |                                                                                                                                                                       |
| 359 | 1lr5A<br>(160) | 109-153 (45) | 124-153 (30) | 133-153 (21) | C | 0.26 | 2.02 | 69.63%<br>(94/135)  | 11.11%<br>(15/135) |  <p>Auxin binding protein 1<br/>DTDP-6-deoxy-3,4-keto-hexulose<br/>isomerase</p> |
|     | 2pakA<br>(135) | 98-123 (26)  | 111-123 (13) | 133-153 (21) |   |      |      |                     |                    |                                                                                                                                                                       |



|     |                |              |              |              |   |      |      |                     |                    |                                                                                                                                                                       |
|-----|----------------|--------------|--------------|--------------|---|------|------|---------------------|--------------------|-----------------------------------------------------------------------------------------------------------------------------------------------------------------------|
| 360 | 1lr5A<br>(160) | 1-41 (41)    | 29-41 (13)   | 39-41 (3)    | N | 0.32 | 2.33 | 87.31%<br>(117/134) | 11.19%<br>(15/134) | 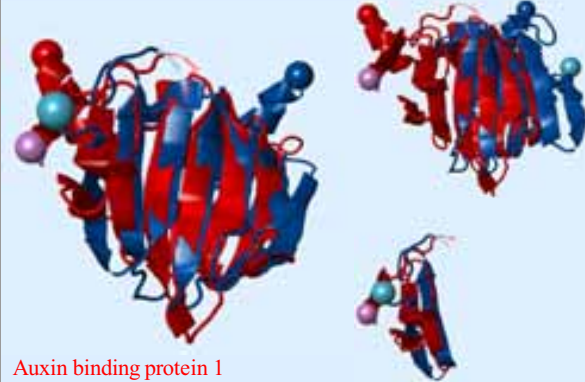 <p>Auxin binding protein 1<br/>DTDP-6-deoxy-3,4-keto-hexulose<br/>isomerase</p>   |
|     | 2pakB<br>(134) | 2-32 (31)    | 20-32 (13)   | 39-41 (3)    |   |      |      |                     |                    |                                                                                                                                                                       |
| 361 | 1lr5A<br>(160) | 132-153 (22) | 132-153 (22) | 133-153 (21) | C | 0.27 | 2.04 | 70.15%<br>(94/134)  | 11.19%<br>(15/134) |  <p>Auxin binding protein 1<br/>DTDP-6-deoxy-3,4-keto-hexulose<br/>isomerase</p>   |
|     | 2pakB<br>(134) | 121-123 (3)  | 121-123 (3)  | 133-153 (21) |   |      |      |                     |                    |                                                                                                                                                                       |
| 362 | 1lr5A<br>(160) | 18-36 (39)   | 18-41 (24)   | 39-41 (3)    | N | 0.37 | 2.41 | 88.15%<br>(119/135) | 10.37%<br>(14/135) |  <p>Auxin binding protein 1<br/>DTDP-6-deoxy-3,4-keto-hexulose<br/>isomerase</p> |
|     | 2pamA<br>(135) | 11-48 (38)   | 11-32 (22)   | 39-41 (3)    |   |      |      |                     |                    |                                                                                                                                                                       |

|     |                |              |              |              |   |      |      |                     |                    |                                                                                                                                                                       |
|-----|----------------|--------------|--------------|--------------|---|------|------|---------------------|--------------------|-----------------------------------------------------------------------------------------------------------------------------------------------------------------------|
| 363 | 1lr5A<br>(160) | 120-153 (34) | 128-153 (26) | 133-153 (21) | C | 0.27 | 2.01 | 69.63%<br>(94/135)  | 10.37%<br>(14/135) |  <p>Auxin binding protein 1<br/>DTDP-6-deoxy-3,4-keto-hexulose<br/>isomerase</p>   |
|     | 2pamA<br>(135) | 107-123 (17) | 115-123 (9)  | 133-153 (21) |   |      |      |                     |                    |                                                                                                                                                                       |
| 364 | 1lr5A<br>(160) | 1-41 (41)    | 29-41 (13)   | 39-41 (3)    | N | 0.32 | 2.30 | 87.31%<br>(117/134) | 10.45%<br>(14/134) |  <p>Auxin binding protein 1<br/>DTDP-6-deoxy-3,4-keto-hexulose<br/>isomerase</p>   |
|     | 2pamB<br>(134) | 2-32 (31)    | 20-32 (13)   | 39-41 (3)    |   |      |      |                     |                    |                                                                                                                                                                       |
| 365 | 1lr5A<br>(160) | 132-153 (22) | 132-153 (22) | 133-153 (21) | C | 0.28 | 2.00 | 70.15%<br>(94/134)  | 10.45%<br>(14/134) |  <p>Auxin binding protein 1<br/>DTDP-6-deoxy-3,4-keto-hexulose<br/>isomerase</p> |
|     | 2pamB<br>(134) | 121-123 (3)  | 121-123 (3)  | 133-153 (21) |   |      |      |                     |                    |                                                                                                                                                                       |

|     |                |                               |                               |                             |   |      |      |                     |                    |                                                                                                                                                                              |
|-----|----------------|-------------------------------|-------------------------------|-----------------------------|---|------|------|---------------------|--------------------|------------------------------------------------------------------------------------------------------------------------------------------------------------------------------|
| 366 | 1m1dA<br>(163) | 176-197 (22)                  | 176-195 (20)                  | 177-194 (18)                | C | 0.38 | 2.03 | 75.16%<br>(121/161) | 11.18%<br>(18/161) | 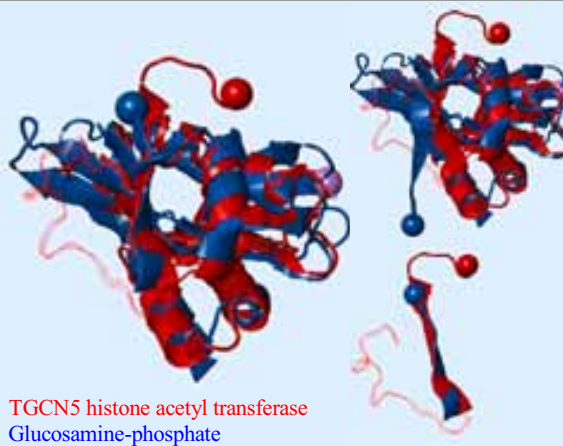 <p>TGCN5 histone acetyl transferase<br/>Glucosamine-phosphate<br/>N-acetyltransferase</p> |
|     | 1i1dD<br>(161) | 150-154 (5)                   | 150-152 (3)                   | 177-194 (18)                |   |      |      |                     |                    |                                                                                                                                                                              |
| 367 | 1m1dA<br>(163) | 178-192 (15),<br>179-199 (21) | 178-192 (15),<br>179-195 (17) | 178-181 (4),<br>191-195 (5) | M | 0.28 | 2.36 | 89.81%<br>(141/157) | 14.01%<br>(22/157) |  <p>TGCN5 histone acetyl transferase<br/>Hypothetical protein yqjY</p>                   |
|     | 1mk4A<br>(157) | 128-146 (19),<br>133-153 (21) | 128-146 (19),<br>133-149 (17) | 178-181 (4),<br>191-195 (5) |   |      |      |                     |                    |                                                                                                                                                                              |
| 368 | 1m1dA<br>(163) | 168-194 (27)                  | 171-193 (23)                  | 173-193 (21)                | C | 0.43 | 2.29 | 86.00%<br>(129/150) | 13.33%<br>(20/150) |  <p>TGCN5 histone acetyl transferase<br/>HPA2 histone acetyltransferase</p>             |
|     | 1qsmA<br>(150) | 138-147 (10)                  | 141-146 (6)                   | 173-193 (21)                |   |      |      |                     |                    |                                                                                                                                                                              |

|     |                |              |              |              |   |      |      |                     |                    |                                                                                                                                                                         |
|-----|----------------|--------------|--------------|--------------|---|------|------|---------------------|--------------------|-------------------------------------------------------------------------------------------------------------------------------------------------------------------------|
| 369 | 1m1dA<br>(163) | 170-205 (36) | 170-197 (28) | 173-197 (25) | C | 0.44 | 2.22 | 86.58%<br>(129/149) | 13.42%<br>(20/149) |  <p>TGCN5 histone acetyl transferase<br/>HPA2 histone acetyltransferase</p>           |
|     | 1qsmB<br>(149) | 140-155 (16) | 140-147 (8)  | 173-197 (25) |   |      |      |                     |                    |                                                                                                                                                                         |
| 370 | 1m1dA<br>(163) | 168-193 (26) | 171-193 (23) | 173-193 (21) | C | 0.43 | 2.25 | 84.87%<br>(129/152) | 13.16%<br>(20/152) |  <p>TGCN5 histone acetyl transferase<br/>HPA2 histone acetyltransferase</p>         |
|     | 1qsmD<br>(152) | 138-146 (9)  | 141-146 (6)  | 173-193 (21) |   |      |      |                     |                    |                                                                                                                                                                         |
| 371 | 1m1dA<br>(163) | 175-202 (28) | 176-202 (27) | 177-195 (19) | C | 0.47 | 2.20 | 89.66%<br>(130/145) | 9.66%<br>(14/145)  |  <p>TGCN5 histone acetyl transferase<br/>Aminoglycoside 6'-N-acetyltransferase</p> |
|     | 1s3zB<br>(145) | 133-143 (11) | 134-143 (10) | 177-195 (19) |   |      |      |                     |                    |                                                                                                                                                                         |

|     |                |              |              |              |   |      |      |                     |                   |                                                                                                                                                                      |
|-----|----------------|--------------|--------------|--------------|---|------|------|---------------------|-------------------|----------------------------------------------------------------------------------------------------------------------------------------------------------------------|
| 372 | 1m1dA<br>(163) | 173-203 (29) | 176-202 (27) | 177-195 (19) | C | 0.44 | 2.16 | 84.31%<br>(129/153) | 8.50%<br>(13/153) | 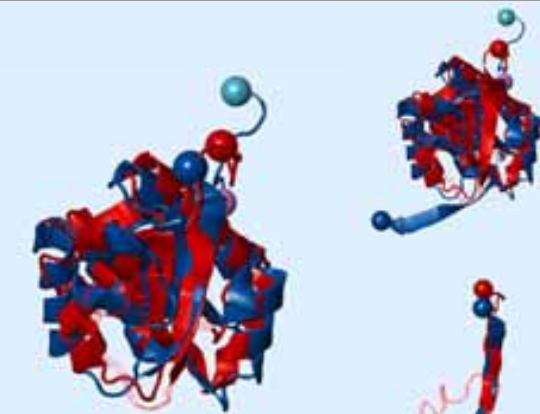 <p>TGCN5 histone acetyl transferase<br/>Aminoglycoside 6'-N-acetyltransferase</p> |
|     | 1s5kA<br>(153) | 133-144 (12) | 134-143 (10) | 177-195 (19) |   |      |      |                     |                   |                                                                                                                                                                      |
| 373 | 1m1dA<br>(163) | 175-197 (23) | 176-194 (19) | 176-193 (18) | C | 0.39 | 2.46 | 83.23%<br>(129/155) | 9.68%<br>(15/155) |  <p>TGCN5 histone acetyl transferase<br/>YYCN protein</p>                         |
|     | 1ufhA<br>(155) | 146-151 (6)  | 147-148 (2)  | 176-193 (18) |   |      |      |                     |                   |                                                                                                                                                                      |
| 374 | 1m1dA<br>(163) | 176-197 (22) | 176-197 (22) | 176-193 (18) | C | 0.44 | 2.08 | 83.12%<br>(128/154) | 9.09%<br>(14/154) |  <p>TGCN5 histone acetyl transferase<br/>YYCN protein</p>                       |
|     | 1ufhB<br>(154) | 147-151 (5)  | 147-151 (5)  | 176-193 (18) |   |      |      |                     |                   |                                                                                                                                                                      |

|     |                |              |              |              |   |      |      |                     |                    |                                                                                                                                                                              |
|-----|----------------|--------------|--------------|--------------|---|------|------|---------------------|--------------------|------------------------------------------------------------------------------------------------------------------------------------------------------------------------------|
| 375 | 1m1dA<br>(163) | 173-198 (24) | 176-198 (23) | 176-193 (18) | C | 0.45 | 2.10 | 85.91%<br>(128/149) | 12.08%<br>(18/149) |  <p>TGCN5 histone acetyltransferase<br/>Putative acetyl transferase</p>                    |
|     | 1vkcA<br>(149) | 140-146 (7)  | 141-146 (6)  | 176-193 (18) |   |      |      |                     |                    |                                                                                                                                                                              |
| 376 | 1m1dA<br>(163) | 176-200 (25) | 176-197 (22) | 177-194 (18) | C | 0.38 | 1.92 | 73.62%<br>(120/163) | 10.43%<br>(17/163) |  <p>TGCN5 histone acetyltransferase<br/>Glucosamine 6-phosphate<br/>acetyltransferase</p> |
|     | 2vxkA<br>(165) | 181-188 (8)  | 181-185 (5)  | 177-194 (18) |   |      |      |                     |                    |                                                                                                                                                                              |
| 377 | 1mk4A<br>(157) | 125-148 (24) | 125-148 (24) | 127-146 (20) | C | 0.51 | 2.01 | 89.66%<br>(130/145) | 20.69%<br>(30/145) |  <p>Hypothetical protein yqjY<br/>Aminoglycoside 6'-N-acetyltransferase</p>             |
|     | 1s3zB<br>(145) | 133-137 (5)  | 133-137 (5)  | 127-146 (20) |   |      |      |                     |                    |                                                                                                                                                                              |

|     |                |              |              |              |   |      |      |                     |                    |                                                                                                                                                               |
|-----|----------------|--------------|--------------|--------------|---|------|------|---------------------|--------------------|---------------------------------------------------------------------------------------------------------------------------------------------------------------|
| 378 | lmk4A<br>(157) | 125-155 (31) | 125-155 (31) | 128-149 (22) | C | 0.47 | 2.04 | 83.66%<br>(128/153) | 19.61%<br>(30/153) | 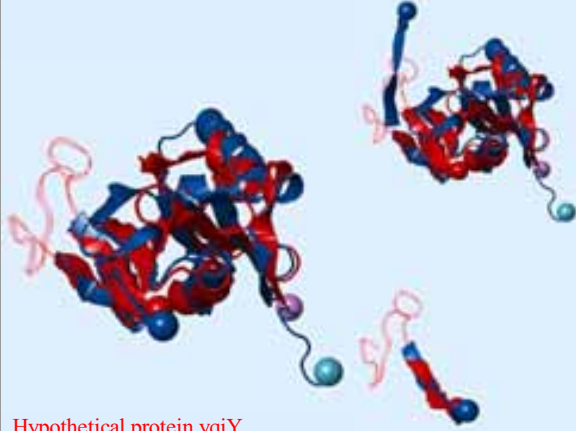 <p>Hypothetical protein yqjY<br/>Aminoglycoside 6'-N-acetyltransferase</p> |
|     | ls5kA<br>(153) | 133-142 (10) | 133-142 (10) | 128-149 (22) |   |      |      |                     |                    |                                                                                                                                                               |
| 379 | lmk4A<br>(157) | 125-153 (29) | 125-150 (26) | 127-148 (22) | C | 0.37 | 2.56 | 80.65%<br>(125/155) | 9.68%<br>(15/155)  |  <p>Hypothetical protein yqjY<br/>YYCN protein</p>                        |
|     | lufhA<br>(155) | 146-153 (8)  | 146-150 (5)  | 127-148 (22) |   |      |      |                     |                    |                                                                                                                                                               |
| 380 | lmk4A<br>(157) | 125-153 (29) | 125-150 (26) | 127-148 (22) | C | 0.39 | 2.51 | 82.47%<br>(127/154) | 10.39%<br>(16/154) |  <p>Hypothetical protein yqjY<br/>YYCN protein</p>                       |
|     | lufhB<br>(154) | 146-153 (8)  | 146-150 (5)  | 127-148 (22) |   |      |      |                     |                    |                                                                                                                                                               |

|     |                |              |              |              |   |      |      |                     |                    |                                                                                                                                                         |
|-----|----------------|--------------|--------------|--------------|---|------|------|---------------------|--------------------|---------------------------------------------------------------------------------------------------------------------------------------------------------|
| 381 | 1mk4A<br>(157) | 122-154 (33) | 125-149 (25) | 127-147 (21) | C | 0.47 | 2.26 | 87.33%<br>(131/150) | 18.67%<br>(28/150) |  <p>Hypothetical protein yqjY<br/>Transcriptional regulator</p>       |
|     | 1z4eA<br>(150) | 140-152 (13) | 143-147 (5)  | 127-147 (21) |   |      |      |                     |                    |                                                                                                                                                         |
| 382 | 1mk4A<br>(157) | 125-155 (31) | 125-150 (26) | 125-151 (27) | C | 0.47 | 2.25 | 93.85%<br>(122/130) | 13.85%<br>(18/130) |  <p>Hypothetical protein yqjY<br/>Hypothetical protein TTHA1254</p> |
|     | 2d4pA<br>(130) | 116-129 (14) | 116-124 (9)  | 125-151 (27) |   |      |      |                     |                    |                                                                                                                                                         |
| 383 | 1mk4A<br>(157) | 125-156 (32) | 125-156 (32) | 127-135 (9)  | C | 0.35 | 2.50 | 87.26%<br>(137/157) | 13.38%<br>(21/157) |  <p>Hypothetical protein yqjY<br/>Diamine acetyltransferase 1</p>  |
|     | 2g3tA<br>(169) | 146-171 (26) | 146-171 (26) | 127-135 (9)  |   |      |      |                     |                    |                                                                                                                                                         |



|     |                |              |              |              |   |      |      |                     |                    |                                                                                                                                                                  |
|-----|----------------|--------------|--------------|--------------|---|------|------|---------------------|--------------------|------------------------------------------------------------------------------------------------------------------------------------------------------------------|
| 384 | 1mk4A<br>(157) | 125-154 (30) | 125-149 (25) | 127-149 (23) | C | 0.40 | 2.23 | 82.17%<br>(129/157) | 13.38%<br>(21/157) |  <p>Hypothetical protein yqjY<br/>Diamine acetyltransferase 1</p>              |
|     | 2jevA<br>(169) | 146-159 (14) | 146-154 (9)  | 127-149 (23) |   |      |      |                     |                    |                                                                                                                                                                  |
| 385 | 1mk4A<br>(157) | 125-155 (31) | 125-155 (31) | 128-149 (22) | C | 0.47 | 2.16 | 87.07%<br>(128/147) | 20.41%<br>(30/147) |  <p>Hypothetical protein yqjY<br/>Aminoglycoside 6'-N-acetyltransferase</p>   |
|     | 2vbqA<br>(147) | 133-142 (10) | 133-142 (10) | 128-149 (22) |   |      |      |                     |                    |                                                                                                                                                                  |
| 386 | 1mk4A<br>(157) | 125-155 (31) | 125-155 (31) | 128-149 (22) | C | 0.48 | 2.09 | 88.19%<br>(127/144) | 19.44%<br>(28/144) |  <p>Hypothetical protein yqjY<br/>Aminoglycoside 6'-N-acetyltransferase</p> |
|     | 2vbqB<br>(144) | 133-142 (10) | 133-142 (10) | 128-149 (22) |   |      |      |                     |                    |                                                                                                                                                                  |

|     |                 |              |              |             |   |      |      |                     |                     |                                                                                                                                                  |
|-----|-----------------|--------------|--------------|-------------|---|------|------|---------------------|---------------------|--------------------------------------------------------------------------------------------------------------------------------------------------|
| 387 | lobpA<br>(158)  | 93-126 (34)  | 101-126 (26) | 121-126 (6) | C | 0.41 | 2.77 | 88.61%<br>(140/158) | 14.56%<br>(23/158)  | 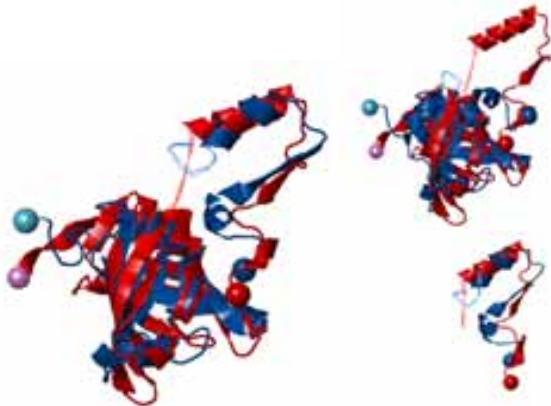 <p>Odorant-binding protein<br/>Beta-lactoglobulin a</p>       |
|     | lclj5A<br>(162) | 96-130 (35)  | 105-130 (26) | 121-126 (6) |   |      |      |                     |                     |                                                                                                                                                  |
| 388 | lobpA<br>(158)  | 119-129 (11) | 121-126 (6)  | 121-126 (6) | C | 0.53 | 2.11 | 89.87%<br>(142/158) | 15.19%<br>(24/158)  |  <p>Odorant-binding protein<br/>Beta-lactoglobulin</p>       |
|     | ldv9A<br>(162)  | 122-133 (12) | 124-130 (7)  | 121-126 (6) |   |      |      |                     |                     |                                                                                                                                                  |
| 389 | lobpA<br>(158)  | 3-12 (10)    | 3-10 (8)     | 10-10 (1)   | N | 0.88 | 0.81 | 97.45%<br>(153/157) | 91.72%<br>(144/157) |  <p>Odorant-binding protein<br/>Odorant binding protein</p> |
|     | lpboA<br>(157)  | 2-12 (11)    | 2-10 (9)     | 10-10 (1)   |   |      |      |                     |                     |                                                                                                                                                  |

|     |                |              |              |             |   |      |      |                     |                    |                                                                                                                                                                         |
|-----|----------------|--------------|--------------|-------------|---|------|------|---------------------|--------------------|-------------------------------------------------------------------------------------------------------------------------------------------------------------------------|
| 390 | 1obpA<br>(158) | 121-129 (9)  | 121-129 (9)  | 121-129 (9) | C | 0.37 | 2.38 | 83.54%<br>(132/158) | 7.59%<br>(12/158)  | 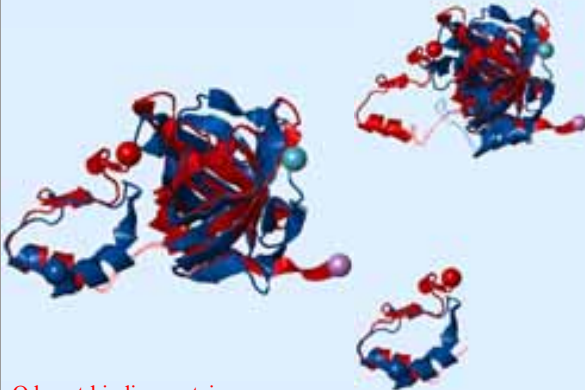 <p>Odorant-binding protein<br/>Nitrophorin 4</p>                                    |
|     | 1sy2A<br>(184) | 139-146 (8)  | 139-146 (8)  | 121-129 (9) |   |      |      |                     |                    |                                                                                                                                                                         |
| 391 | 1obpA<br>(158) | 107-123 (17) | 121-123 (3)  | 121-123 (3) | C | 0.33 | 2.55 | 81.65%<br>(129/158) | 6.96%<br>(11/158)  |  <p>Odorant-binding protein<br/>Nitrophorin 1</p>                                    |
|     | 1u17A<br>(185) | 126-143 (18) | 140-143 (4)  | 121-123 (3) |   |      |      |                     |                    |                                                                                                                                                                         |
| 392 | 1q2yA<br>(140) | 122-136 (15) | 122-133 (12) | 125-130 (6) | C | 0.53 | 2.02 | 89.29%<br>(125/140) | 12.14%<br>(17/140) |  <p>Similar to hypothetical proteins<br/>Aminoglycoside 6'-N-acetyltransferase</p> |
|     | 1s3zB<br>(145) | 135-144 (10) | 135-141 (7)  | 125-130 (6) |   |      |      |                     |                    |                                                                                                                                                                         |

|     |                |              |              |              |   |      |      |                     |                    |                                                                                                                                                                                 |
|-----|----------------|--------------|--------------|--------------|---|------|------|---------------------|--------------------|---------------------------------------------------------------------------------------------------------------------------------------------------------------------------------|
| 393 | 1q2yA<br>(140) | 122-139 (18) | 122-139 (18) | 122-132 (11) | C | 0.35 | 2.20 | 83.57%<br>(117/140) | 15.71%<br>(22/140) |  <p>Similar to hypothetical proteins<br/>Glucosamine 6-phosphate<br/>N-acetyltransferase</p>  |
|     | 2o28A<br>(182) | 173-181 (9)  | 173-181 (9)  | 122-132 (11) |   |      |      |                     |                    |                                                                                                                                                                                 |
| 394 | 1q2yA<br>(140) | 122-133 (12) | 122-133 (12) | 125-131 (7)  | C | 0.52 | 2.02 | 88.57%<br>(124/140) | 12.14%<br>(17/140) |  <p>Similar to hypothetical proteins<br/>Aminoglycoside 6'-N-acetyltransferase</p>           |
|     | 2vbkB<br>(144) | 135-140 (6)  | 135-140 (6)  | 125-131 (7)  |   |      |      |                     |                    |                                                                                                                                                                                 |
| 395 | 1q2yA<br>(140) | 122-139 (18) | 122-137 (16) | 123-135 (13) | C | 0.40 | 2.00 | 82.14%<br>(115/140) | 18.57%<br>(26/140) |  <p>Similar to hypothetical proteins<br/>Glucosamine 6-phosphate<br/>acetyltransferase</p> |
|     | 2vxkA<br>(165) | 182-187 (6)  | 182-185 (4)  | 123-135 (13) |   |      |      |                     |                    |                                                                                                                                                                                 |

|     |                |              |              |              |   |      |      |                     |                    |                                                                                                                                                                                          |
|-----|----------------|--------------|--------------|--------------|---|------|------|---------------------|--------------------|------------------------------------------------------------------------------------------------------------------------------------------------------------------------------------------|
| 396 | 1s60A<br>(152) | 129-144 (16) | 135-139 (5)  | 138-138 (1)  | C | 0.50 | 1.73 | 88.82%<br>(135/152) | 13.82%<br>(21/152) | 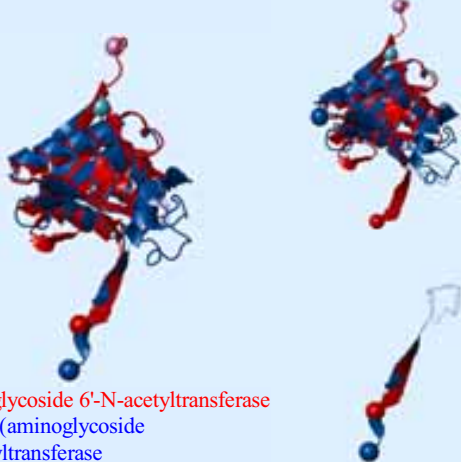 <p>Aminoglycoside 6'-N-acetyltransferase<br/>Protein (aminoglycoside<br/>N6'-acetyltransferase)</p>   |
|     | 1b87A<br>(181) | 149-176 (28) | 155-170 (16) | 138-138 (1)  |   |      |      |                     |                    |                                                                                                                                                                                          |
| 397 | 1s60A<br>(152) | 110-145 (36) | 110-145 (36) | 115-136 (22) | C | 0.43 | 2.14 | 88.24%<br>(120/136) | 8.82%<br>(12/136)  |  <p>Aminoglycoside 6'-N-acetyltransferase<br/>Protein (serratia marcescens<br/>aminoglycoside-3)</p> |
|     | 1bo4B<br>(136) | 140-160 (21) | 140-160 (21) | 115-136 (22) |   |      |      |                     |                    |                                                                                                                                                                                          |
| 398 | 1s60A<br>(152) | 134-136 (3)  | 134-136 (3)  | 134-136 (3)  | C | 0.46 | 2.25 | 88.16%<br>(134/152) | 13.16%<br>(20/152) |  <p>Aminoglycoside 6'-N-acetyltransferase<br/>Serotonin N-acetyltransferase</p>                     |
|     | 1kuxA<br>(166) | 175-186 (12) | 175-186 (12) | 134-136 (3)  |   |      |      |                     |                    |                                                                                                                                                                                          |

|     |                |              |              |             |   |      |      |                     |                    |                                                                                                                                                                   |
|-----|----------------|--------------|--------------|-------------|---|------|------|---------------------|--------------------|-------------------------------------------------------------------------------------------------------------------------------------------------------------------|
| 399 | 1s60A<br>(152) | 128-141 (14) | 129-141 (13) | 140-140 (1) | C | 0.44 | 2.29 | 87.50%<br>(133/152) | 11.84%<br>(18/152) | 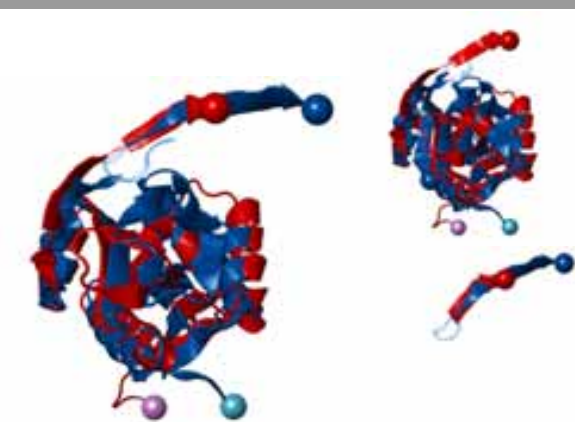 <p>Aminoglycoside 6'-N-acetyltransferase<br/>Serotonin N-acetyltransferase</p> |
|     | 1l0cA<br>(166) | 169-187 (19) | 170-187 (18) | 140-140 (1) |   |      |      |                     |                    |                                                                                                                                                                   |
| 400 | 1s60A<br>(152) | 129-141 (13) | 135-141 (7)  | 139-139 (1) | C | 0.50 | 1.76 | 88.82%<br>(135/152) | 13.82%<br>(21/152) |  <p>Aminoglycoside 6'-N-acetyltransferase<br/>Aac(6)-Ii</p>                    |
|     | 1n71A<br>(180) | 149-170 (22) | 155-170 (16) | 139-139 (1) |   |      |      |                     |                    |                                                                                                                                                                   |
| 401 | 1s60A<br>(152) | 129-144 (16) | 135-143 (9)  | 139-139 (1) | C | 0.44 | 1.84 | 88.82%<br>(135/152) | 13.82%<br>(21/152) |  <p>Aminoglycoside 6'-N-acetyltransferase<br/>Aac(6)-Ii</p>                  |
|     | 1n71B<br>(179) | 149-168 (20) | 155-167 (13) | 139-139 (1) |   |      |      |                     |                    |                                                                                                                                                                   |

|     |                |              |              |             |   |      |      |                     |                    |                                                                                                                                                                    |
|-----|----------------|--------------|--------------|-------------|---|------|------|---------------------|--------------------|--------------------------------------------------------------------------------------------------------------------------------------------------------------------|
| 402 | 1s60A<br>(152) | 126-144 (19) | 131-138 (8)  | 135-136 (2) | C | 0.41 | 2.40 | 84.87%<br>(129/152) | 7.89%<br>(12/152)  | 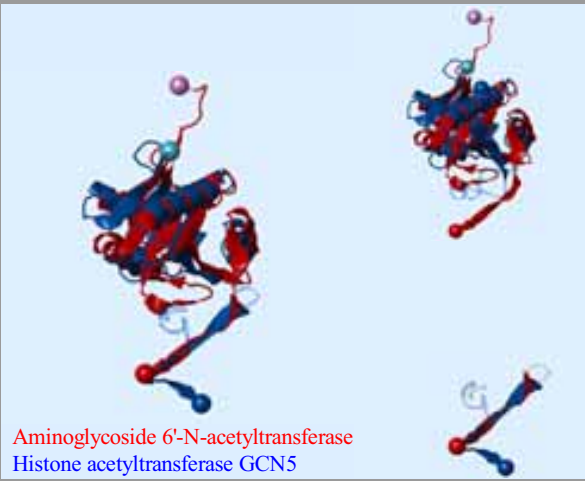 <p>Aminoglycoside 6'-N-acetyltransferase<br/>Histone acetyltransferase GCN5</p> |
|     | 1q2dA<br>(161) | 168-203 (36) | 173-197 (25) | 135-136 (2) |   |      |      |                     |                    |                                                                                                                                                                    |
| 403 | 1s60A<br>(152) | 135-143 (9)  | 135-140 (6)  | 139-139 (1) | C | 0.45 | 2.18 | 90.13%<br>(137/152) | 11.84%<br>(18/152) |  <p>Aminoglycoside 6'-N-acetyltransferase<br/>Acetyl transferase</p>           |
|     | 1s7nA<br>(177) | 153-169 (17) | 153-166 (14) | 139-139 (1) |   |      |      |                     |                    |                                                                                                                                                                    |
| 404 | 1s60A<br>(152) | 135-144 (10) | 135-143 (9)  | 139-140 (2) | C | 0.46 | 2.19 | 90.13%<br>(137/152) | 11.84%<br>(18/152) |  <p>Aminoglycoside 6'-N-acetyltransferase<br/>Acetyl transferase</p>          |
|     | 1s7nD<br>(177) | 153-172 (20) | 153-171 (19) | 139-140 (2) |   |      |      |                     |                    |                                                                                                                                                                    |

|     |                |              |              |             |   |      |      |                     |                    |                                                                                                                                                                 |
|-----|----------------|--------------|--------------|-------------|---|------|------|---------------------|--------------------|-----------------------------------------------------------------------------------------------------------------------------------------------------------------|
| 405 | 1s60A<br>(152) | 131-140 (10) | 131-139 (9)  | 138-138 (1) | C | 0.50 | 2.36 | 91.45%<br>(139/152) | 11.18%<br>(17/152) |  <p>Aminoglycoside 6'-N-acetyltransferase<br/>Hypothetical protein PH1933</p> |
|     | 1wwzB<br>(157) | 140-152 (13) | 140-151 (12) | 138-138 (1) |   |      |      |                     |                    |                                                                                                                                                                 |
| 406 | 1s60A<br>(152) | 18-42 (25)   | 20-42 (23)   | 20-42 (23)  | N | 0.42 | 1.95 | 80.71%<br>(113/140) | 11.43%<br>(16/140) |  <p>Aminoglycoside 6'-N-acetyltransferase<br/>Acetyltransferase</p>          |
|     | 1y9wA<br>(140) | 25-38 (14)   | 27-38 (12)   | 20-42 (23)  |   |      |      |                     |                    |                                                                                                                                                                 |
| 407 | 1s60A<br>(152) | 135-141 (7)  | 135-140 (6)  | 137-137 (1) | C | 0.33 | 1.50 | 66.43%<br>(93/140)  | 12.86%<br>(18/140) |  <p>Aminoglycoside 6'-N-acetyltransferase<br/>Acetyltransferase</p>        |
|     | 1y9wA<br>(140) | 121-136 (16) | 121-135 (15) | 137-137 (1) |   |      |      |                     |                    |                                                                                                                                                                 |



|     |                |              |              |             |   |      |      |                     |                    |                                                                                                                                                                                        |
|-----|----------------|--------------|--------------|-------------|---|------|------|---------------------|--------------------|----------------------------------------------------------------------------------------------------------------------------------------------------------------------------------------|
| 408 | 1s60A<br>(152) | 124-144 (21) | 134-140 (7)  | 135-136 (2) | C | 0.38 | 2.48 | 80.13%<br>(121/151) | 11.92%<br>(18/151) | 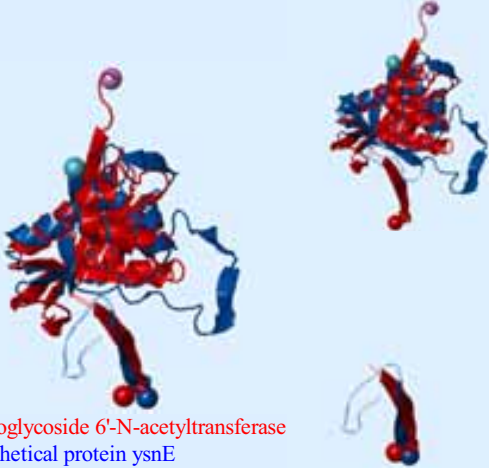 <p>Aminoglycoside 6'-N-acetyltransferase<br/>Hypothetical protein ysnE</p>                          |
|     | 1yx0A<br>(151) | 121-150 (30) | 131-146 (16) | 135-136 (2) |   |      |      |                     |                    |                                                                                                                                                                                        |
| 409 | 1s60A<br>(152) | 137-144 (8)  | 137-141 (5)  | 138-138 (1) | C | 0.48 | 1.91 | 86.09%<br>(130/151) | 14.57%<br>(22/151) |  <p>Aminoglycoside 6'-N-acetyltransferase<br/>Modification OF 30S ribosomal<br/>subunit protein</p> |
|     | 2cntA<br>(151) | 125-144 (20) | 125-141 (17) | 138-138 (1) |   |      |      |                     |                    |                                                                                                                                                                                        |
| 410 | 1s60A<br>(152) | 131-144 (14) | 135-139 (5)  | 138-138 (1) | C | 0.43 | 2.06 | 90.13%<br>(137/152) | 17.76%<br>(27/152) |  <p>Aminoglycoside 6'-N-acetyltransferase<br/>Acetyltransferase PA4866 FROM P.<br/>aeruginosa</p> |
|     | 2j8mA<br>(171) | 138-161 (24) | 142-156 (15) | 138-138 (1) |   |      |      |                     |                    |                                                                                                                                                                                        |

|     |                |              |              |             |   |      |      |                     |                    |                                                                                                                                                                                       |
|-----|----------------|--------------|--------------|-------------|---|------|------|---------------------|--------------------|---------------------------------------------------------------------------------------------------------------------------------------------------------------------------------------|
| 411 | 1s60A<br>(152) | 129-139 (11) | 135-139 (5)  | 138-138 (1) | C | 0.40 | 2.11 | 90.13%<br>(137/152) | 15.79%<br>(24/152) | 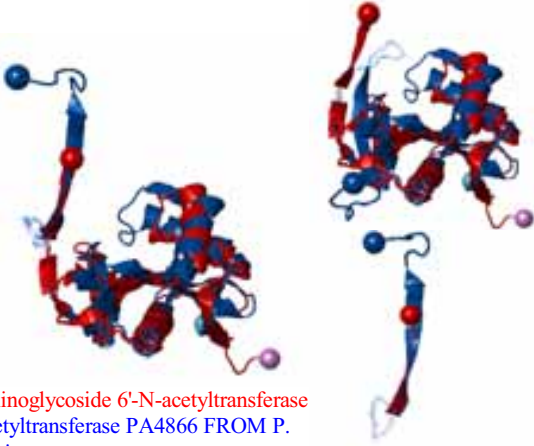 <p>Aminoglycoside 6'-N-acetyltransferase<br/>Acetyltransferase PA4866 FROM P.<br/>aeruginosa</p>   |
|     | 2j8mB<br>(170) | 136-156 (21) | 142-156 (15) | 138-138 (1) |   |      |      |                     |                    |                                                                                                                                                                                       |
| 412 | 1s60A<br>(152) | 129-144 (16) | 135-141 (7)  | 137-137 (1) | C | 0.45 | 2.05 | 89.47%<br>(136/152) | 16.45%<br>(25/152) |  <p>Aminoglycoside 6'-N-acetyltransferase<br/>Acetyltransferase PA4866 FROM P.<br/>aeruginosa</p> |
|     | 2j8nA<br>(169) | 136-163 (28) | 142-160 (19) | 137-137 (1) |   |      |      |                     |                    |                                                                                                                                                                                       |
| 413 | 1s60A<br>(152) | 131-141 (11) | 134-141 (8)  | 137-137 (1) | C | 0.52 | 2.19 | 91.72%<br>(133/145) | 15.17%<br>(22/145) |  <p>Aminoglycoside 6'-N-acetyltransferase<br/>Glyphosate N-acetyltransferase</p>                 |
|     | 2jdcA<br>(145) | 122-140 (19) | 125-140 (16) | 137-137 (1) |   |      |      |                     |                    |                                                                                                                                                                                       |

|     |                |              |              |              |   |      |      |                     |                    |                                                                                                                                                                                   |
|-----|----------------|--------------|--------------|--------------|---|------|------|---------------------|--------------------|-----------------------------------------------------------------------------------------------------------------------------------------------------------------------------------|
| 414 | 1s60A<br>(152) | -6-15 (22)   | -6-15 (22)   | 2-2 (1)      | N | 0.34 | 2.43 | 84.21%<br>(128/152) | 10.53%<br>(16/152) | 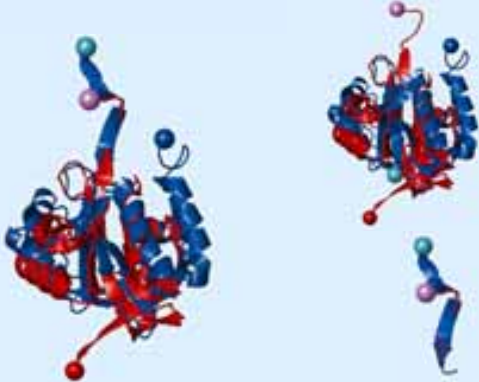 <p>Aminoglycoside 6'-N-acetyltransferase<br/>Putative uncharacterized protein<br/>TTHA1799</p> |
|     | 2z0zA<br>(194) | 1-23 (23)    | 1-23 (23)    | 2-2 (1)      |   |      |      |                     |                    |                                                                                                                                                                                   |
| 415 | 1s60A<br>(152) | 105-144 (40) | 131-143 (13) | 131-138 (8)  | C | 0.35 | 2.37 | 78.95%<br>(120/152) | 7.89%<br>(12/152)  |  <p>Aminoglycoside 6'-N-acetyltransferase<br/>Histone acetyltransferase GCN5</p>               |
|     | 5genA<br>(166) | 106-159 (54) | 129-158 (30) | 131-138 (8)  |   |      |      |                     |                    |                                                                                                                                                                                   |
| 416 | 1s7fA<br>(181) | 148-174 (27) | 154-174 (21) | 154-166 (13) | C | 0.34 | 2.84 | 83.83%<br>(140/167) | 10.18%<br>(17/167) |  <p>Acetyl transferase<br/>Diamine acetyltransferase 1</p>                                   |
|     | 2f5iA<br>(167) | 143-168 (26) | 149-168 (20) | 154-166 (13) |   |      |      |                     |                    |                                                                                                                                                                                   |

|     |                |              |              |              |   |      |      |                     |                    |                                                                                                                                                 |
|-----|----------------|--------------|--------------|--------------|---|------|------|---------------------|--------------------|-------------------------------------------------------------------------------------------------------------------------------------------------|
| 417 | 1s7fA<br>(181) | -7-16 (24)   | 6-12 (7)     | 7-10 (4)     | N | 0.39 | 2.61 | 86.14%<br>(143/166) | 10.24%<br>(17/166) |  <p>Acetyl transferase<br/>Probable N-acetyltransferase</p>   |
|     | 2fe7B<br>(166) | -7-8 (16)    | 1-4 (4)      | 7-10 (4)     |   |      |      |                     |                    |                                                                                                                                                 |
| 418 | 1s7fA<br>(181) | 148-175 (28) | 153-171 (19) | 153-168 (16) | C | 0.38 | 2.52 | 83.73%<br>(139/166) | 10.84%<br>(18/166) |  <p>Acetyl transferase<br/>Probable N-acetyltransferase</p>  |
|     | 2fe7B<br>(166) | 135-152 (18) | 140-145 (6)  | 153-168 (16) |   |      |      |                     |                    |                                                                                                                                                 |
| 419 | 1s7fA<br>(181) | 148-175 (28) | 154-175 (22) | 154-165 (12) | C | 0.35 | 2.70 | 82.84%<br>(140/169) | 11.24%<br>(19/169) |  <p>Acetyl transferase<br/>Diamine acetyltransferase 1</p> |
|     | 2g3tA<br>(169) | 143-169 (27) | 149-169 (21) | 154-165 (12) |   |      |      |                     |                    |                                                                                                                                                 |

|     |                |              |              |              |   |      |      |                      |                    |                                                                                                                                               |
|-----|----------------|--------------|--------------|--------------|---|------|------|----------------------|--------------------|-----------------------------------------------------------------------------------------------------------------------------------------------|
| 420 | 1s7fA<br>(181) | 148-175 (28) | 152-175 (24) | 154-167 (14) | C | 0.34 | 2.88 | 84.02%<br>(142/169)  | 11.24%<br>(19/169) | 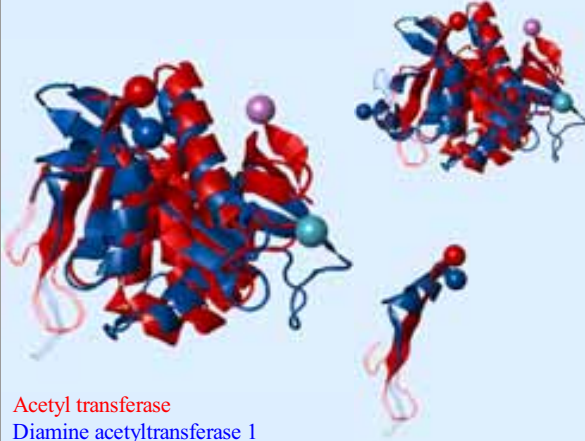 <p>Acetyl transferase<br/>Diamine acetyltransferase 1</p> |
|     | 2jevA<br>(169) | 143-169 (27) | 147-169 (23) | 154-167 (14) |   |      |      |                      |                    |                                                                                                                                               |
| 421 | 1sjvA<br>(102) | 90-98 (9)    | 93-98 (6)    | 93-98 (6)    | C | 0.64 | 1.65 | 100.00%<br>(102/102) | 62.75%<br>(64/102) |  <p>R9<br/>IGM MEZ immunoglobulin</p>                     |
|     | 1dqIH<br>(123) | 95-111 (17)  | 98-111 (14)  | 93-98 (6)    |   |      |      |                      |                    |                                                                                                                                               |
| 422 | 1sjvA<br>(102) | 93-103 (11)  | 94-103 (10)  | 95-99 (5)    | C | 0.65 | 1.34 | 98.04%<br>(100/102)  | 69.61%<br>(71/102) |  <p>R9<br/>Antibody heavy chain</p>                      |
|     | 1f2xK<br>(126) | 896-919 (24) | 897-919 (23) | 95-99 (5)    |   |      |      |                      |                    |                                                                                                                                               |

|     |                |                |                |           |   |      |      |                     |                    |                                                                                       |
|-----|----------------|----------------|----------------|-----------|---|------|------|---------------------|--------------------|---------------------------------------------------------------------------------------|
| 423 | 1sjvA<br>(102) | 93-103 (11)    | 94-98 (5)      | 94-98 (5) | C | 0.65 | 1.43 | 99.02%<br>(101/102) | 69.61%<br>(71/102) |     |
|     | 1f2xL<br>(126) | 1096-1119 (24) | 1097-1114 (18) | 94-98 (5) |   |      |      |                     |                    |                                                                                       |
| 424 | 1sjvA<br>(102) | 91-98 (8)      | 94-98 (5)      | 94-98 (5) | C | 0.62 | 1.50 | 99.02%<br>(101/102) | 67.65%<br>(69/102) |    |
|     | 1i3vA<br>(129) | 101-117 (17)   | 104-117 (14)   | 94-98 (5) |   |      |      |                     |                    |                                                                                       |
| 425 | 1sjvA<br>(102) | 93-99 (7)      | 93-99 (7)      | 93-99 (7) | C | 0.64 | 1.63 | 98.04%<br>(100/102) | 57.84%<br>(59/102) |  |
|     | 1i8kB<br>(119) | 398-409 (12)   | 398-409 (12)   | 93-99 (7) |   |      |      |                     |                    |                                                                                       |

|     |                |             |             |           |   |      |      |                     |                    |                                                                                                                      |
|-----|----------------|-------------|-------------|-----------|---|------|------|---------------------|--------------------|----------------------------------------------------------------------------------------------------------------------|
| 426 | IsjvA<br>(102) | 90-104 (15) | 93-103 (11) | 93-98 (6) | C | 0.65 | 1.71 | 98.04%<br>(100/102) | 40.20%<br>(41/102) |  <p>R9<br/>IGG1 FAB chain H</p>    |
|     | lic4H<br>(114) | 94-107 (14) | 97-106 (10) | 93-98 (6) |   |      |      |                     |                    |                                                                                                                      |
| 427 | IsjvA<br>(102) | 90-104 (15) | 93-98 (6)   | 93-98 (6) | C | 0.66 | 1.66 | 98.04%<br>(100/102) | 40.20%<br>(41/102) |  <p>R9<br/>IGG1 FAB chain H</p>   |
|     | lic5H<br>(114) | 94-107 (14) | 97-101 (5)  | 93-98 (6) |   |      |      |                     |                    |                                                                                                                      |
| 428 | IsjvA<br>(102) | 90-99 (10)  | 93-98 (6)   | 93-99 (7) | C | 0.66 | 1.63 | 98.04%<br>(100/102) | 39.22%<br>(40/102) |  <p>R9<br/>IGG1 FAB chain H</p> |
|     | lic7H<br>(114) | 94-102 (9)  | 97-101 (5)  | 93-99 (7) |   |      |      |                     |                    |                                                                                                                      |

|     |                |             |             |           |   |      |      |                     |                    |                                                                                       |
|-----|----------------|-------------|-------------|-----------|---|------|------|---------------------|--------------------|---------------------------------------------------------------------------------------|
| 429 | lsjvA<br>(102) | 93-98 (6)   | 93-98 (6)   | 94-98 (5) | C | 0.65 | 1.65 | 98.04%<br>(100/102) | 41.18%<br>(42/102) |     |
|     | ljhIH<br>(116) | 98-106 (9)  | 98-106 (9)  | 94-98 (5) |   |      |      |                     |                    |                                                                                       |
| 430 | lsjvA<br>(102) | 94-101 (8)  | 94-99 (6)   | 94-99 (6) | C | 0.63 | 1.34 | 99.02%<br>(101/102) | 72.55%<br>(74/102) |    |
|     | ljtoA<br>(132) | 99-124 (26) | 99-122 (24) | 94-99 (6) |   |      |      |                     |                    |                                                                                       |
| 431 | lsjvA<br>(102) | 94-98 (5)   | 94-98 (5)   | 94-98 (5) | C | 0.65 | 1.13 | 99.02%<br>(101/102) | 72.55%<br>(74/102) |  |
|     | ljtpA<br>(135) | 99-121 (23) | 99-121 (23) | 94-98 (5) |   |      |      |                     |                    |                                                                                       |



|     |                |             |              |           |   |      |      |                     |                    |                                                                                                                                                |
|-----|----------------|-------------|--------------|-----------|---|------|------|---------------------|--------------------|------------------------------------------------------------------------------------------------------------------------------------------------|
| 432 | IsjvA<br>(102) | 94-99 (6)   | 94-98 (5)    | 94-98 (5) | C | 0.66 | 1.13 | 99.02%<br>(101/102) | 73.53%<br>(75/102) | 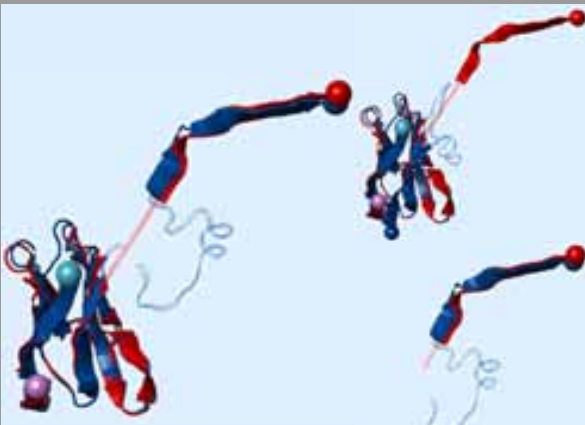 <p>R9<br/>Single-domain antibody</p>                        |
|     | IjtpB<br>(133) | 99-122 (24) | 99-121 (23)  | 94-98 (5) |   |      |      |                     |                    |                                                                                                                                                |
| 433 | IsjvA<br>(102) | 93-103 (11) | 93-98 (6)    | 94-99 (6) | C | 0.67 | 1.43 | 98.04%<br>(100/102) | 66.67%<br>(68/102) |  <p>R9<br/>Antibody VHH fragment cabamd9</p>                |
|     | IkxqE<br>(120) | 95-113 (19) | 95-108 (14)  | 94-99 (6) |   |      |      |                     |                    |                                                                                                                                                |
| 434 | IsjvA<br>(102) | 94-98 (5)   | 95-98 (4)    | 96-98 (3) | C | 0.70 | 1.12 | 99.02%<br>(101/102) | 68.63%<br>(70/102) |  <p>R9<br/>Immunoglobulin heavy chain variable region</p> |
|     | ImvfA<br>(126) | 99-114 (16) | 100-114 (15) | 96-98 (3) |   |      |      |                     |                    |                                                                                                                                                |

|     |                |              |              |             |   |      |      |                      |                    |                                                                                                                                               |
|-----|----------------|--------------|--------------|-------------|---|------|------|----------------------|--------------------|-----------------------------------------------------------------------------------------------------------------------------------------------|
| 435 | IsjvA<br>(102) | 93-103 (11)  | 93-99 (7)    | 94-99 (6)   | C | 0.67 | 1.55 | 100.00%<br>(102/102) | 44.12%<br>(45/102) |  <p>R9<br/>Immunoglobulin heavy chain variable region</p>   |
|     | In4xH<br>(120) | 398-413 (16) | 398-409 (12) | 94-99 (6)   |   |      |      |                      |                    |                                                                                                                                               |
| 436 | IsjvA<br>(102) | 93-106 (14)  | 93-105 (13)  | 94-105 (12) | C | 0.65 | 1.72 | 100.00%<br>(102/102) | 35.29%<br>(36/102) |  <p>R9<br/>Immunoglobulin heavy chain variable region</p> |
|     | In4xI<br>(119) | 398-415 (18) | 398-414 (17) | 94-105 (12) |   |      |      |                      |                    |                                                                                                                                               |
| 437 | IsjvA<br>(102) | 87-109 (23)  | 91-98 (8)    | 94-100 (7)  | C | 0.63 | 1.69 | 100.00%<br>(102/102) | 41.18%<br>(42/102) |  <p>R9<br/>Single chain antibody</p>                     |
|     | InmcH<br>(122) | 88-112 (25)  | 92-101 (10)  | 94-100 (7)  |   |      |      |                      |                    |                                                                                                                                               |

|     |                |              |              |             |   |      |      |                     |                    |                                                                                                                                 |
|-----|----------------|--------------|--------------|-------------|---|------|------|---------------------|--------------------|---------------------------------------------------------------------------------------------------------------------------------|
| 438 | IsjvA<br>(102) | 93-109 (17)  | 93-103 (11)  | 94-98 (5)   | C | 0.28 | 1.89 | 94.12%<br>(96/102)  | 26.47%<br>(27/102) | 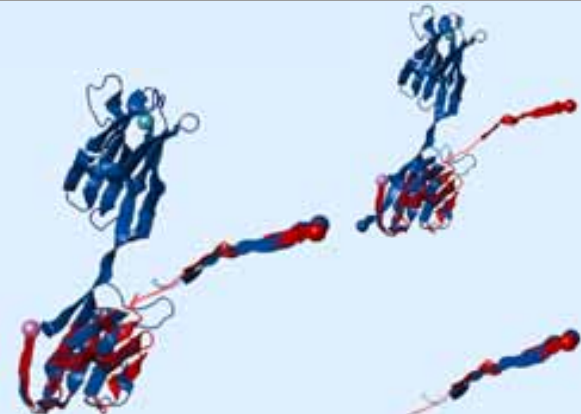 <p>R9<br/>Single-chain antibody fragment</p> |
|     | InqbA<br>(232) | 215-232 (18) | 215-226 (12) | 94-98 (5)   |   |      |      |                     |                    |                                                                                                                                 |
| 439 | IsjvA<br>(102) | 93-104 (12)  | 94-103 (10)  | 94-98 (5)   | C | 0.66 | 1.35 | 98.04%<br>(100/102) | 67.65%<br>(69/102) |  <p>R9<br/>Camelid antibody heavy chain</p>  |
|     | Iri8A<br>(124) | 97-119 (23)  | 98-118 (21)  | 94-98 (5)   |   |      |      |                     |                    |                                                                                                                                 |
| 440 | IsjvA<br>(102) | 93-103 (11)  | 93-103 (11)  | 93-103 (11) | C | 0.66 | 1.54 | 97.06%<br>(99/102)  | 62.75%<br>(64/102) |  <p>R9<br/>M12-variable heavy domain</p>   |
|     | It2jA<br>(116) | 94-106 (13)  | 94-106 (13)  | 93-103 (11) |   |      |      |                     |                    |                                                                                                                                 |

|     |                |             |             |            |   |      |      |                     |                    |                                                                                                                                |
|-----|----------------|-------------|-------------|------------|---|------|------|---------------------|--------------------|--------------------------------------------------------------------------------------------------------------------------------|
| 441 | 1sjvA<br>(102) | 90-104 (15) | 93-98 (6)   | 93-98 (6)  | C | 0.66 | 1.56 | 97.06%<br>(99/102)  | 41.18%<br>(42/102) |  <p>R9<br/>Ig vh,anti-lysozyme</p>          |
|     | 1uacH<br>(114) | 94-107 (14) | 97-101 (5)  | 93-98 (6)  |   |      |      |                     |                    |                                                                                                                                |
| 442 | 1sjvA<br>(102) | 91-109 (19) | 91-108 (18) | 95-102 (8) | C | 0.66 | 1.71 | 99.02%<br>(101/102) | 38.24%<br>(39/102) |  <p>R9<br/>ANTI EGFR antibody FV region</p> |
|     | 1wt5A<br>(115) | 96-114 (19) | 96-113 (18) | 95-102 (8) |   |      |      |                     |                    |                                                                                                                                |
| 443 | 1sjvA<br>(102) | 94-106 (13) | 94-106 (13) | 94-99 (6)  | C | 0.62 | 1.45 | 99.02%<br>(101/102) | 61.76%<br>(63/102) |  <p>R9<br/>Heavy chain antibody</p>       |
|     | 1xfpA<br>(131) | 99-128 (30) | 99-128 (30) | 94-99 (6)  |   |      |      |                     |                    |                                                                                                                                |

|     |                |             |              |           |   |      |      |                     |                    |                                                                                                                                                  |
|-----|----------------|-------------|--------------|-----------|---|------|------|---------------------|--------------------|--------------------------------------------------------------------------------------------------------------------------------------------------|
| 444 | lsjvA<br>(102) | 94-104 (11) | 94-98 (5)    | 94-98 (5) | C | 0.62 | 1.43 | 99.02%<br>(101/102) | 69.61%<br>(71/102) |  <p>R9<br/>Antibody cabbcii-10:lys3</p>                        |
|     | lzmyA<br>(132) | 99-127 (29) | 99-121 (23)  | 94-98 (5) |   |      |      |                     |                    |                                                                                                                                                  |
| 445 | lsjvA<br>(102) | 94-98 (5)   | 94-98 (5)    | 94-98 (5) | C | 0.65 | 1.54 | 98.04%<br>(100/102) | 69.61%<br>(71/102) |  <p>R9<br/>Immunoglobulin heavy chain antibody variable</p>   |
|     | lzv5A<br>(119) | 99-109 (11) | 99-109 (11)  | 94-98 (5) |   |      |      |                     |                    |                                                                                                                                                  |
| 446 | lsjvA<br>(102) | 93-98 (6)   | 95-98 (4)    | 95-98 (4) | C | 0.68 | 1.22 | 98.04%<br>(100/102) | 64.71%<br>(66/102) |  <p>R9<br/>Immunoglobulin heavy chain antibody variable</p> |
|     | lzvhA<br>(124) | 98-113 (16) | 100-113 (14) | 95-98 (4) |   |      |      |                     |                    |                                                                                                                                                  |

|     |                |              |              |             |   |      |      |                     |                    |                                                                                                                                               |
|-----|----------------|--------------|--------------|-------------|---|------|------|---------------------|--------------------|-----------------------------------------------------------------------------------------------------------------------------------------------|
| 447 | 1sjvA<br>(102) | 95-107 (13)  | 95-107 (13)  | 95-105 (11) | C | 0.64 | 1.41 | 98.04%<br>(100/102) | 52.94%<br>(54/102) |  <p>R9<br/>Immunoglobulin heavy chain antibody variable</p> |
|     | 1zvyA<br>(125) | 100-122 (23) | 100-122 (23) | 95-105 (11) |   |      |      |                     |                    |                                                                                                                                               |
| 448 | 1sjvA<br>(102) | 95-103 (9)   | 95-103 (9)   | 95-99 (5)   | C | 0.66 | 1.47 | 99.02%<br>(101/102) | 64.71%<br>(66/102) |  <p>R9<br/>Llama immunoglobulin</p>                        |
|     | 2bseD<br>(122) | 100-116 (17) | 100-116 (17) | 95-99 (5)   |   |      |      |                     |                    |                                                                                                                                               |
| 449 | 1sjvA<br>(102) | 91-99 (9)    | 93-98 (6)    | 93-98 (6)   | C | 0.66 | 1.60 | 97.06%<br>(99/102)  | 39.22%<br>(40/102) |  <p>R9<br/>Ig vh,anti-lysozyme</p>                       |
|     | 2dqch<br>(114) | 95-102 (8)   | 97-101 (5)   | 93-98 (6)   |   |      |      |                     |                    |                                                                                                                                               |

|     |                |             |             |           |   |      |      |                    |                    |                                                                                                                         |
|-----|----------------|-------------|-------------|-----------|---|------|------|--------------------|--------------------|-------------------------------------------------------------------------------------------------------------------------|
| 450 | 1sjvA<br>(102) | 91-104 (14) | 93-103 (11) | 93-98 (6) | C | 0.66 | 1.56 | 97.06%<br>(99/102) | 40.20%<br>(41/102) | 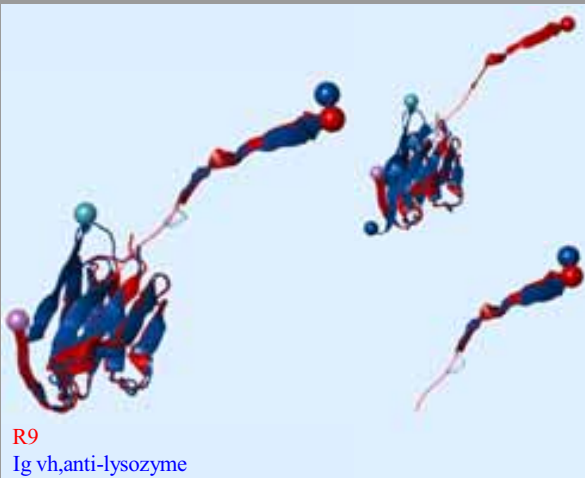 <p>R9<br/>Ig vh,anti-lysozyme</p>    |
|     | 2dqdH<br>(114) | 95-107 (13) | 97-106 (10) | 93-98 (6) |   |      |      |                    |                    |                                                                                                                         |
| 451 | 1sjvA<br>(102) | 91-104 (14) | 93-98 (6)   | 93-98 (6) | C | 0.66 | 1.61 | 97.06%<br>(99/102) | 38.24%<br>(39/102) |  <p>R9<br/>Ig vh,anti-lysozyme</p>  |
|     | 2dqeH<br>(114) | 95-107 (13) | 97-101 (5)  | 93-98 (6) |   |      |      |                    |                    |                                                                                                                         |
| 452 | 1sjvA<br>(102) | 90-98 (9)   | 91-98 (8)   | 93-98 (6) | C | 0.66 | 1.56 | 97.06%<br>(99/102) | 40.20%<br>(41/102) |  <p>R9<br/>Ig vh,anti-lysozyme</p> |
|     | 2dqfB<br>(114) | 94-101 (8)  | 95-101 (7)  | 93-98 (6) |   |      |      |                    |                    |                                                                                                                         |

|     |                |             |             |           |   |      |      |                     |                    |                                                                                                                         |
|-----|----------------|-------------|-------------|-----------|---|------|------|---------------------|--------------------|-------------------------------------------------------------------------------------------------------------------------|
| 453 | 1sjvA<br>(102) | 91-104 (14) | 93-103 (11) | 93-99 (7) | C | 0.65 | 1.69 | 98.04%<br>(100/102) | 41.18%<br>(42/102) |  <p>R9<br/>Ig vh,anti-lysozyme</p>    |
|     | 2dqgH<br>(114) | 95-107 (13) | 97-106 (10) | 93-99 (7) |   |      |      |                     |                    |                                                                                                                         |
| 454 | 1sjvA<br>(102) | 91-103 (13) | 91-98 (8)   | 93-98 (6) | C | 0.65 | 1.62 | 97.06%<br>(99/102)  | 38.24%<br>(39/102) |  <p>R9<br/>Ig vh,anti-lysozyme</p>   |
|     | 2dqhH<br>(114) | 95-106 (12) | 95-101 (7)  | 93-98 (6) |   |      |      |                     |                    |                                                                                                                         |
| 455 | 1sjvA<br>(102) | 91-99 (9)   | 93-98 (6)   | 93-98 (6) | C | 0.66 | 1.60 | 97.06%<br>(99/102)  | 38.24%<br>(39/102) |  <p>R9<br/>Ig vh,anti-lysozyme</p> |
|     | 2dqjH<br>(114) | 95-102 (8)  | 97-101 (5)  | 93-98 (6) |   |      |      |                     |                    |                                                                                                                         |



|     |                |              |              |              |   |      |      |                      |                     |                                                                                                                                                        |
|-----|----------------|--------------|--------------|--------------|---|------|------|----------------------|---------------------|--------------------------------------------------------------------------------------------------------------------------------------------------------|
| 456 | 1sjvA<br>(102) | 90-99 (10)   | 93-98 (6)    | 93-98 (6)    | C | 0.66 | 1.71 | 98.04%<br>(100/102)  | 41.18%<br>(42/102)  |  <p>R9<br/>ANTI-lysozyme antibody FV region</p>                      |
|     | 2yssB<br>(113) | 94-102 (9)   | 97-101 (5)   | 93-98 (6)    |   |      |      |                      |                     |                                                                                                                                                        |
| 457 | 1sjvA<br>(102) | 91-103 (13)  | 93-99 (7)    | 93-103 (11)  | C | 0.61 | 1.61 | 99.02%<br>(101/102)  | 45.10%<br>(46/102)  |  <p>R9<br/>Heavy chain (VH) OF FV-fragment</p>                      |
|     | 3cx5J<br>(127) | 96-115 (20)  | 98-111 (14)  | 93-103 (11)  |   |      |      |                      |                     |                                                                                                                                                        |
| 458 | 1sndA<br>(129) | 104-124 (21) | 108-121 (14) | 112-121 (10) | C | 0.83 | 1.07 | 100.00%<br>(129/129) | 99.22%<br>(128/129) |  <p>Staphylococcal nuclease dimer<br/>Staphylococcal nuclease</p> |
|     | 1nsnS<br>(138) | 104-124 (21) | 108-121 (14) | 112-121 (10) |   |      |      |                      |                     |                                                                                                                                                        |

|     |                |              |              |              |   |      |      |                     |                    |                                                                                                                                                                      |
|-----|----------------|--------------|--------------|--------------|---|------|------|---------------------|--------------------|----------------------------------------------------------------------------------------------------------------------------------------------------------------------|
| 459 | 1tiyA<br>(157) | 101-157 (57) | 104-157 (54) | 104-119 (16) | C | 0.25 | 1.53 | 91.54%<br>(119/130) | 30.00%<br>(39/130) |  <p>Guanine deaminase<br/>Cytidine and deoxycytidylate<br/>deaminase</p>           |
|     | 2a8nA<br>(130) | 101-131 (31) | 104-131 (28) | 104-119 (16) |   |      |      |                     |                    |                                                                                                                                                                      |
| 460 | 1tiyA<br>(157) | 104-143 (40) | 104-133 (30) | 104-133 (30) | C | 0.58 | 1.71 | 89.33%<br>(134/150) | 29.33%<br>(44/150) |  <p>Guanine deaminase<br/>TRNA adenosine deaminase</p>                           |
|     | 2b3jD<br>(150) | 104-137 (34) | 104-127 (24) | 104-133 (30) |   |      |      |                     |                    |                                                                                                                                                                      |
| 461 | 1tiyA<br>(157) | 110-141 (32) | 110-141 (32) | 114-141 (28) | C | 0.57 | 1.59 | 91.72%<br>(144/157) | 27.39%<br>(43/157) |  <p>Guanine deaminase<br/>Cytidine and deoxycytidylate<br/>deaminase zinc-b</p> |
|     | 2g84B<br>(182) | 139-168 (30) | 139-168 (30) | 114-141 (28) |   |      |      |                     |                    |                                                                                                                                                                      |

|     |                |              |              |              |   |      |      |                     |                    |                                                                                                                                                               |
|-----|----------------|--------------|--------------|--------------|---|------|------|---------------------|--------------------|---------------------------------------------------------------------------------------------------------------------------------------------------------------|
| 462 | 1tiyA<br>(157) | 87-114 (28)  | 94-114 (21)  | 103-114 (12) | C | 0.33 | 1.97 | 78.32%<br>(112/143) | 18.88%<br>(27/143) |  <p>Guanine deaminase<br/>Deoxycytidylate deaminase</p>                     |
|     | 2hvvA<br>(143) | 103-124 (22) | 110-124 (15) | 103-114 (12) |   |      |      |                     |                    |                                                                                                                                                               |
| 463 | 1u6mA<br>(189) | 173-189 (17) | 176-189 (14) | 176-185 (10) | C | 0.37 | 2.42 | 87.92%<br>(131/149) | 20.81%<br>(31/149) |  <p>Acetyltransferase, GNAT family<br/>Putative acetyl transferase</p>    |
|     | 1vkcA<br>(149) | 142-149 (8)  | 145-149 (5)  | 176-185 (10) |   |      |      |                     |                    |                                                                                                                                                               |
| 464 | 1u6mA<br>(189) | 170-185 (16) | 170-184 (15) | 176-180 (5)  | C | 0.35 | 2.53 | 93.08%<br>(121/130) | 16.15%<br>(21/130) |  <p>Acetyltransferase, GNAT family<br/>Hypothetical protein TTHA1254</p> |
|     | 2d4pA<br>(130) | 116-129 (14) | 116-128 (13) | 176-180 (5)  |   |      |      |                     |                    |                                                                                                                                                               |

|     |                |              |              |              |   |      |      |                     |                    |                                                                                                                                                             |
|-----|----------------|--------------|--------------|--------------|---|------|------|---------------------|--------------------|-------------------------------------------------------------------------------------------------------------------------------------------------------------|
| 465 | 1u6mA<br>(189) | 170-183 (14) | 170-183 (14) | 170-180 (11) | C | 0.40 | 2.04 | 82.04%<br>(137/167) | 21.56%<br>(36/167) | 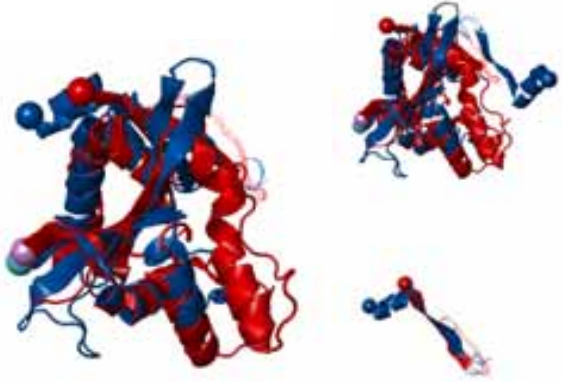 <p>Acetyltransferase, GNAT family<br/>Diamine acetyltransferase 1</p>   |
|     | 2f5iA<br>(167) | 146-155 (10) | 146-155 (10) | 170-180 (11) |   |      |      |                     |                    |                                                                                                                                                             |
| 466 | 1u6mA<br>(189) | 171-183 (13) | 171-183 (13) | 171-180 (10) | C | 0.42 | 2.00 | 82.14%<br>(138/168) | 22.02%<br>(37/168) |  <p>Acetyltransferase, GNAT family<br/>Diamine acetyltransferase 1</p>   |
|     | 2g3tB<br>(168) | 147-155 (9)  | 147-155 (9)  | 171-180 (10) |   |      |      |                     |                    |                                                                                                                                                             |
| 467 | 1u6mA<br>(189) | 169-183 (15) | 169-183 (15) | 169-180 (12) | C | 0.39 | 2.07 | 80.47%<br>(136/169) | 20.71%<br>(35/169) |  <p>Acetyltransferase, GNAT family<br/>Diamine acetyltransferase 1</p> |
|     | 2jevA<br>(169) | 145-155 (11) | 145-155 (11) | 169-180 (12) |   |      |      |                     |                    |                                                                                                                                                             |

|     |                |            |            |           |   |      |      |                    |                    |                                                                                                                                                     |
|-----|----------------|------------|------------|-----------|---|------|------|--------------------|--------------------|-----------------------------------------------------------------------------------------------------------------------------------------------------|
| 468 | 1v9yA<br>(103) | 21-27 (7)  | 23-26 (4)  | 26-26 (1) | N | 0.49 | 1.95 | 96.12%<br>(99/103) | 15.53%<br>(16/103) | 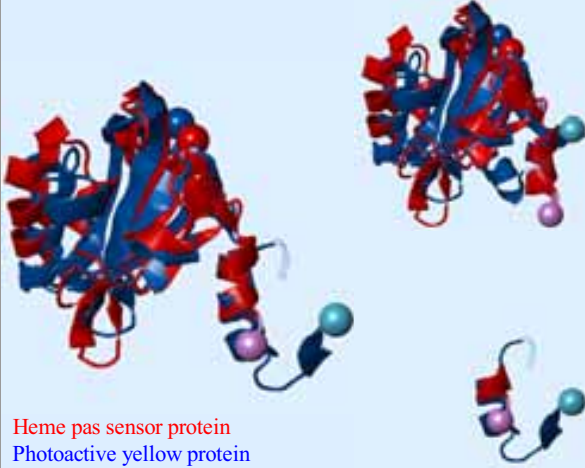 <p>Heme pas sensor protein<br/>Photoactive yellow protein</p>    |
|     | 1f9iA<br>(125) | 15-24 (10) | 17-23 (7)  | 26-26 (1) |   |      |      |                    |                    |                                                                                                                                                     |
| 469 | 1v9yA<br>(103) | 21-27 (7)  | 25-27 (3)  | 26-26 (1) | N | 0.53 | 2.05 | 96.12%<br>(99/103) | 15.53%<br>(16/103) |  <p>Heme pas sensor protein<br/>Photoactive yellow protein</p>  |
|     | 1gsvA<br>(122) | 5-24 (20)  | 16-24 (9)  | 26-26 (1) |   |      |      |                    |                    |                                                                                                                                                     |
| 470 | 1v9yA<br>(103) | 25-27 (3)  | 25-27 (3)  | 25-26 (2) | N | 0.53 | 2.04 | 96.12%<br>(99/103) | 15.53%<br>(16/103) |  <p>Heme pas sensor protein<br/>Photoactive yellow protein</p> |
|     | 1gswA<br>(122) | 15-24 (10) | 15-24 (10) | 25-26 (2) |   |      |      |                    |                    |                                                                                                                                                     |

|     |                |            |            |           |   |      |      |                    |                    |                                                                                                                                                     |
|-----|----------------|------------|------------|-----------|---|------|------|--------------------|--------------------|-----------------------------------------------------------------------------------------------------------------------------------------------------|
| 471 | 1v9yA<br>(103) | 25-28 (4)  | 25-27 (3)  | 26-26 (1) | N | 0.53 | 2.06 | 96.12%<br>(99/103) | 13.59%<br>(14/103) | 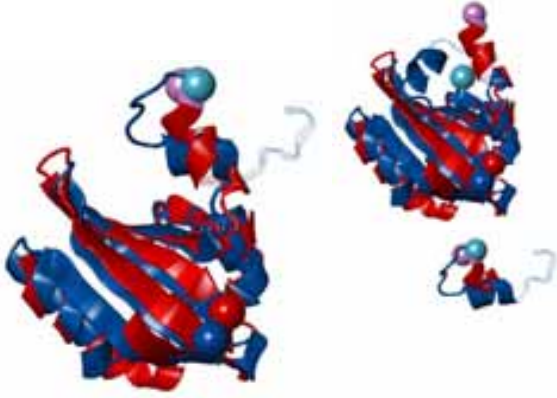 <p>Heme pas sensor protein<br/>Photoactive yellow protein</p>    |
|     | 1gsxA<br>(122) | 15-25 (11) | 15-24 (10) | 26-26 (1) |   |      |      |                    |                    |                                                                                                                                                     |
| 472 | 1v9yA<br>(103) | 23-27 (5)  | 24-25 (2)  | 25-25 (1) | N | 0.44 | 1.92 | 95.15%<br>(98/103) | 13.59%<br>(14/103) |  <p>Heme pas sensor protein<br/>PPR</p>                          |
|     | 1mzuB<br>(114) | 16-24 (9)  | 17-22 (6)  | 25-25 (1) |   |      |      |                    |                    |                                                                                                                                                     |
| 473 | 1v9yA<br>(103) | 21-28 (8)  | 21-26 (6)  | 26-26 (1) | N | 0.51 | 2.03 | 96.12%<br>(99/103) | 14.56%<br>(15/103) |  <p>Heme pas sensor protein<br/>Photoactive yellow protein</p> |
|     | 1ot6A<br>(125) | 5-25 (21)  | 5-23 (19)  | 26-26 (1) |   |      |      |                    |                    |                                                                                                                                                     |

|     |                |            |           |           |   |      |      |                    |                    |                                                                                                                                                     |
|-----|----------------|------------|-----------|-----------|---|------|------|--------------------|--------------------|-----------------------------------------------------------------------------------------------------------------------------------------------------|
| 474 | 1v9yA<br>(103) | 21-27 (7)  | 21-25 (5) | 25-25 (1) | N | 0.39 | 2.05 | 96.12%<br>(99/103) | 14.56%<br>(15/103) |  <p>Heme pas sensor protein<br/>Photoactive yellow protein</p>   |
|     | 1uguA<br>(122) | 15-24 (10) | 15-22 (8) | 25-25 (1) |   |      |      |                    |                    |                                                                                                                                                     |
| 475 | 1v9yA<br>(103) | 25-27 (3)  | 25-26 (2) | 26-26 (1) | N | 0.53 | 1.99 | 96.12%<br>(99/103) | 15.53%<br>(16/103) |  <p>Heme pas sensor protein<br/>Photoactive yellow protein</p>   |
|     | 2d01A<br>(124) | 15-24 (10) | 15-23 (9) | 26-26 (1) |   |      |      |                    |                    |                                                                                                                                                     |
| 476 | 1v9yA<br>(103) | 24-27 (4)  | 24-25 (2) | 24-25 (2) | N | 0.51 | 2.14 | 96.12%<br>(99/103) | 15.53%<br>(16/103) |  <p>Heme pas sensor protein<br/>Photoactive yellow protein</p> |
|     | 2qj7A<br>(123) | 14-24 (11) | 14-22 (9) | 24-25 (2) |   |      |      |                    |                    |                                                                                                                                                     |

|     |                |              |              |              |   |      |      |                     |                    |                                                                                                                                                    |
|-----|----------------|--------------|--------------|--------------|---|------|------|---------------------|--------------------|----------------------------------------------------------------------------------------------------------------------------------------------------|
| 477 | 1v9yA<br>(103) | 21-31 (11)   | 25-31 (7)    | 26-26 (1)    | N | 0.48 | 2.29 | 96.12%<br>(99/103)  | 15.53%<br>(16/103) |  <p>Heme pas sensor protein<br/>Photoactive yellow protein</p>  |
|     | 3phyA<br>(125) | 10-28 (19)   | 15-28 (14)   | 26-26 (1)    |   |      |      |                     |                    |                                                                                                                                                    |
| 478 | 1wk4A<br>(174) | 149-162 (14) | 149-162 (14) | 152-161 (10) | C | 0.58 | 1.85 | 97.93%<br>(142/145) | 16.55%<br>(24/145) |  <p>Ttk003001606<br/>Aminoglycoside 6'-N-acetyltransferase</p> |
|     | 1s3zB<br>(145) | 136-140 (5)  | 136-140 (5)  | 152-161 (10) |   |      |      |                     |                    |                                                                                                                                                    |
| 479 | 1wk4A<br>(174) | 139-155 (17) | 149-155 (7)  | 150-151 (2)  | C | 0.35 | 2.96 | 88.39%<br>(137/155) | 10.32%<br>(16/155) |  <p>Ttk003001606<br/>YYCN protein</p>                         |
|     | 1ufhA<br>(155) | 139-155 (17) | 149-155 (7)  | 150-151 (2)  |   |      |      |                     |                    |                                                                                                                                                    |



|     |                |              |              |              |   |      |      |                     |                    |                                                                                                                                            |
|-----|----------------|--------------|--------------|--------------|---|------|------|---------------------|--------------------|--------------------------------------------------------------------------------------------------------------------------------------------|
| 480 | 1wk4A<br>(174) | 139-165 (27) | 140-165 (26) | 152-160 (9)  | C | 0.43 | 2.25 | 94.62%<br>(123/130) | 16.92%<br>(22/130) |  <p>Ttk003001606<br/>Hypothetical protein TTHA1254</p>   |
|     | 2d4pA<br>(130) | 109-129 (21) | 110-129 (20) | 152-160 (9)  |   |      |      |                     |                    |                                                                                                                                            |
| 481 | 1wk4A<br>(174) | 140-173 (34) | 145-162 (18) | 148-161 (14) | C | 0.52 | 2.17 | 91.02%<br>(152/167) | 14.97%<br>(25/167) |  <p>Ttk003001606<br/>Diamine acetyltransferase 1</p>    |
|     | 2f5iA<br>(167) | 140-166 (27) | 145-154 (10) | 148-161 (14) |   |      |      |                     |                    |                                                                                                                                            |
| 482 | 1wk4A<br>(174) | 144-173 (30) | 145-161 (17) | 148-161 (14) | C | 0.50 | 2.13 | 89.16%<br>(148/166) | 24.10%<br>(40/166) |  <p>Ttk003001606<br/>Probable N-acetyltransferase</p> |
|     | 2fe7B<br>(166) | 136-155 (20) | 137-142 (6)  | 148-161 (14) |   |      |      |                     |                    |                                                                                                                                            |

|     |                |              |              |              |   |      |      |                     |                    |                                                                                       |
|-----|----------------|--------------|--------------|--------------|---|------|------|---------------------|--------------------|---------------------------------------------------------------------------------------|
| 483 | 1wk4A<br>(174) | 139-173 (35) | 145-173 (29) | 148-163 (16) | C | 0.51 | 2.30 | 91.12%<br>(154/169) | 13.61%<br>(23/169) |    |
|     | 2g3tA<br>(169) | 139-170 (32) | 145-170 (26) | 148-163 (16) |   |      |      |                     |                    |                                                                                       |
| 484 | 1wk4A<br>(174) | 144-173 (30) | 145-164 (20) | 148-161 (14) | C | 0.51 | 2.22 | 90.48%<br>(152/168) | 13.69%<br>(23/168) |    |
|     | 2g3tB<br>(168) | 144-169 (26) | 145-158 (14) | 148-161 (14) |   |      |      |                     |                    |                                                                                       |
| 485 | 1wk4A<br>(174) | 144-173 (30) | 145-173 (29) | 148-160 (13) | C | 0.51 | 2.21 | 89.94%<br>(152/169) | 14.79%<br>(25/169) |  |
|     | 2jevA<br>(169) | 144-166 (23) | 145-166 (22) | 148-160 (13) |   |      |      |                     |                    |                                                                                       |

|     |                |              |              |              |   |      |      |                     |                    |                                                                                                                                                           |
|-----|----------------|--------------|--------------|--------------|---|------|------|---------------------|--------------------|-----------------------------------------------------------------------------------------------------------------------------------------------------------|
| 486 | 1wk4A<br>(174) | 149-173 (25) | 149-173 (25) | 152-164 (13) | C | 0.54 | 2.01 | 96.60%<br>(142/147) | 17.01%<br>(25/147) |  <p>Ttk003001606<br/>Aminoglycoside 6'-N-acetyltransferase</p>          |
|     | 2vbqA<br>(147) | 136-144 (9)  | 136-144 (9)  | 152-164 (13) |   |      |      |                     |                    |                                                                                                                                                           |
| 487 | 1wk4A<br>(174) | 149-165 (17) | 149-161 (13) | 152-160 (9)  | C | 0.57 | 1.86 | 97.92%<br>(141/144) | 16.67%<br>(24/144) |  <p>Ttk003001606<br/>Aminoglycoside 6'-N-acetyltransferase</p>        |
|     | 2vbqB<br>(144) | 136-144 (9)  | 136-140 (5)  | 152-160 (9)  |   |      |      |                     |                    |                                                                                                                                                           |
| 488 | 1wwaX<br>(105) | 282-315 (34) | 295-299 (5)  | 295-299 (5)  | N | 0.49 | 1.94 | 85.71%<br>(90/105)  | 18.10%<br>(19/105) |  <p>Protein (nerve growth factor receptor<br/>TRKA)<br/>Palladin</p> |
|     | 2dm2A<br>(110) | 1-42 (42)    | 19-26 (8)    | 295-299 (5)  |   |      |      |                     |                    |                                                                                                                                                           |

|     |                |              |              |             |   |      |      |                    |                    |                                                                                                                                                                            |
|-----|----------------|--------------|--------------|-------------|---|------|------|--------------------|--------------------|----------------------------------------------------------------------------------------------------------------------------------------------------------------------------|
| 489 | 1wwaX<br>(105) | 286-298 (13) | 286-298 (13) | 295-298 (4) | N | 0.45 | 2.18 | 87.62%<br>(92/105) | 9.52%<br>(10/105)  |  <p>Protein (nerve growth factor receptor TRKA)<br/>New antigen receptor ancestral</p>   |
|     | 2i26O<br>(117) | 3-17 (15)    | 3-17 (15)    | 295-298 (4) |   |      |      |                    |                    |                                                                                                                                                                            |
| 490 | 1wwaX<br>(105) | 284-299 (16) | 291-299 (9)  | 294-299 (6) | N | 0.44 | 2.23 | 85.71%<br>(90/105) | 8.57%<br>(9/105)   |  <p>Protein (nerve growth factor receptor TRKA)<br/>New antigen receptor ancestral</p> |
|     | 2i26P<br>(114) | 3-18 (16)    | 11-18 (8)    | 294-299 (6) |   |      |      |                    |                    |                                                                                                                                                                            |
| 491 | 1wwbX<br>(103) | 286-305 (20) | 286-301 (16) | 297-299 (3) | N | 0.26 | 2.15 | 81.55%<br>(84/103) | 10.68%<br>(11/103) |  <p>Protein (brain derived neurotrophic factor Re CD2)</p>                            |
|     | 1hngA<br>(175) | 3-18 (16)    | 3-14 (12)    | 297-299 (3) |   |      |      |                    |                    |                                                                                                                                                                            |

|     |                |              |              |             |   |      |      |                    |                    |                                                                                                                                                                             |
|-----|----------------|--------------|--------------|-------------|---|------|------|--------------------|--------------------|-----------------------------------------------------------------------------------------------------------------------------------------------------------------------------|
| 492 | 1wwbX<br>(103) | 298-310 (13) | 298-299 (2)  | 298-299 (2) | N | 0.50 | 2.04 | 87.38%<br>(90/103) | 13.59%<br>(14/103) |  <p>Protein (brain derived neurotrophic factor Re)<br/>Neural cell adhesion molecule</p>  |
|     | lie5A<br>(107) | 23-40 (18)   | 23-29 (7)    | 298-299 (2) |   |      |      |                    |                    |                                                                                                                                                                             |
| 493 | 1wwbX<br>(103) | 285-353 (69) | 286-315 (30) | 297-301 (5) | N | 0.43 | 2.06 | 85.44%<br>(88/103) | 9.71%<br>(10/103)  |  <p>Protein (brain derived neurotrophic factor Re)<br/>Antibody VHH fragment cabamd9</p> |
|     | 1kxqE<br>(120) | 2-85 (84)    | 3-31 (29)    | 297-301 (5) |   |      |      |                    |                    |                                                                                                                                                                             |
| 494 | 1wwbX<br>(103) | 285-300 (16) | 293-300 (8)  | 293-300 (8) | N | 0.41 | 2.29 | 84.47%<br>(87/103) | 7.77%<br>(8/103)   |  <p>Protein (brain derived neurotrophic factor Re)<br/>Novel antigen receptor</p>      |
|     | 1sq2N<br>(112) | 3-17 (15)    | 11-17 (7)    | 293-300 (8) |   |      |      |                    |                    |                                                                                                                                                                             |

|     |                |              |              |             |   |      |      |                    |                    |                                                                                                                                                                            |
|-----|----------------|--------------|--------------|-------------|---|------|------|--------------------|--------------------|----------------------------------------------------------------------------------------------------------------------------------------------------------------------------|
| 495 | 1wwbX<br>(103) | 284-311 (28) | 285-306 (22) | 294-300 (7) | N | 0.53 | 2.25 | 94.17%<br>(97/103) | 13.59%<br>(14/103) | 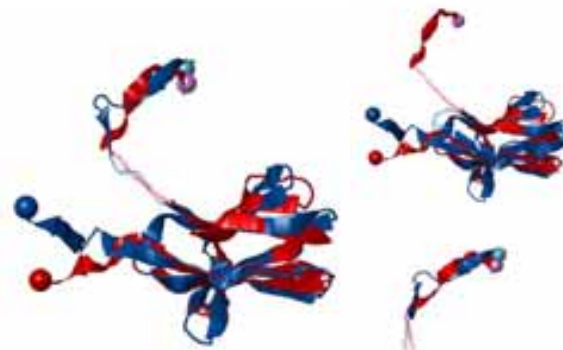 <p>Protein (brain derived neurotrophic factor Re<br/>B and T lymphocyte attenuator</p> |
|     | 2aw2A<br>(110) | 35-65 (31)   | 36-59 (24)   | 294-300 (7) |   |      |      |                    |                    |                                                                                                                                                                            |
| 496 | 1wwbX<br>(103) | 284-345 (62) | 285-312 (28) | 297-300 (4) | N | 0.54 | 2.14 | 92.23%<br>(95/103) | 13.59%<br>(14/103) |  <p>Protein (brain derived neurotrophic factor Re<br/>B and T lymphocyte attenuator</p> |
|     | 2aw2X<br>(107) | 35-99 (65)   | 36-66 (31)   | 297-300 (4) |   |      |      |                    |                    |                                                                                                                                                                            |
| 497 | 1wwbX<br>(103) | 285-345 (61) | 285-315 (31) | 297-301 (5) | N | 0.29 | 2.42 | 94.17%<br>(97/103) | 6.80%<br>(7/103)   |  <p>Protein (brain derived neurotrophic factor Re<br/>INKT-TCR</p>                    |
|     | 2cdeA<br>(192) | 3-74 (72)    | 3-33 (31)    | 297-301 (5) |   |      |      |                    |                    |                                                                                                                                                                            |

|     |                |              |              |             |   |      |      |                    |                    |                                                                                                                                                                                      |
|-----|----------------|--------------|--------------|-------------|---|------|------|--------------------|--------------------|--------------------------------------------------------------------------------------------------------------------------------------------------------------------------------------|
| 498 | 1wwbX<br>(103) | 287-317 (31) | 287-301 (15) | 298-301 (4) | N | 0.48 | 2.21 | 90.29%<br>(93/103) | 6.80%<br>(7/103)   |  <p>Protein (brain derived neurotrophic factor Re)<br/>New antigen receptor ancestral</p>          |
|     | 2i26P<br>(114) | 3-36 (34)    | 3-18 (16)    | 298-301 (4) |   |      |      |                    |                    |                                                                                                                                                                                      |
| 499 | 1wwbX<br>(103) | 283-299 (17) | 283-299 (17) | 294-299 (6) | N | 0.45 | 2.24 | 88.35%<br>(91/103) | 10.68%<br>(11/103) |  <p>Protein (brain derived neurotrophic factor Re)<br/>Bence-jones protein RHE (light chain)</p>  |
|     | 2rheA<br>(114) | 1-16 (16)    | 1-16 (16)    | 294-299 (6) |   |      |      |                    |                    |                                                                                                                                                                                      |
| 500 | 1wwbX<br>(103) | 286-316 (31) | 286-301 (16) | 294-301 (8) | N | 0.47 | 2.15 | 87.38%<br>(90/103) | 8.74%<br>(9/103)   |  <p>Protein (brain derived neurotrophic factor Re)<br/>New antigen receptor variable domain</p> |
|     | 2ywzA<br>(111) | 3-35 (33)    | 3-18 (16)    | 294-301 (8) |   |      |      |                    |                    |                                                                                                                                                                                      |

|     |                |              |              |             |   |      |      |                    |                   |                                                                                                                                                                                  |
|-----|----------------|--------------|--------------|-------------|---|------|------|--------------------|-------------------|----------------------------------------------------------------------------------------------------------------------------------------------------------------------------------|
| 501 | 1wwbX<br>(103) | 283-300 (18) | 283-300 (18) | 298-300 (3) | N | 0.53 | 2.00 | 88.89%<br>(88/99)  | 16.16%<br>(16/99) |  <p>Protein (brain derived neurotrophic factor Re)<br/>Fibroblast growth factor receptor 2</p> |
|     | 3darA<br>(99)  | 151-174 (24) | 151-174 (24) | 298-300 (3) |   |      |      |                    |                   |                                                                                                                                                                                  |
| 502 | 1wwcA<br>(105) | 310-363 (54) | 310-333 (24) | 311-318 (8) | N | 0.34 | 2.31 | 84.76%<br>(89/105) | 5.71%<br>(6/105)  |  <p>Protein (NT-3 growth factor receptor TRKC)<br/>B1-8 FV (light chain)</p>                  |
|     | 1a6wL<br>(109) | 10-75 (66)   | 10-35 (26)   | 311-318 (8) |   |      |      |                    |                   |                                                                                                                                                                                  |
| 503 | 1wwcA<br>(105) | 303-331 (29) | 316-331 (16) | 316-318 (3) | N | 0.26 | 2.45 | 91.43%<br>(96/105) | 4.76%<br>(5/105)  |  <p>Protein (NT-3 growth factor receptor TRKC)<br/>Gamma-delta T-cell receptor</p>          |
|     | 1hxmA<br>(206) | 2-33 (32)    | 16-33 (18)   | 316-318 (3) |   |      |      |                    |                   |                                                                                                                                                                                  |



|     |                |              |              |             |   |      |      |                    |                    |                                                                                                                                                                          |
|-----|----------------|--------------|--------------|-------------|---|------|------|--------------------|--------------------|--------------------------------------------------------------------------------------------------------------------------------------------------------------------------|
| 504 | 1wvcA<br>(105) | 305-318 (14) | 305-318 (14) | 316-318 (3) | N | 0.43 | 2.11 | 84.76%<br>(89/105) | 10.48%<br>(11/105) |  <p>Protein (NT-3 growth factor receptor TRKC)<br/>Novel antigen receptor</p>          |
|     | 1sq2N<br>(112) | 3-17 (15)    | 3-17 (15)    | 316-318 (3) |   |      |      |                    |                    |                                                                                                                                                                          |
| 505 | 1wvcA<br>(105) | 301-329 (29) | 304-324 (21) | 312-319 (8) | N | 0.37 | 2.18 | 86.67%<br>(91/105) | 13.33%<br>(14/105) |  <p>Protein (NT-3 growth factor receptor TRKC)<br/>B and T lymphocyte attenuator</p> |
|     | 2aw2A<br>(110) | 35-65 (31)   | 38-59 (22)   | 312-319 (8) |   |      |      |                    |                    |                                                                                                                                                                          |
| 506 | 1wvcA<br>(105) | 301-335 (35) | 309-318 (10) | 315-318 (4) | N | 0.37 | 1.98 | 85.44%<br>(88/103) | 9.71%<br>(10/103)  |  <p>Protein (NT-3 growth factor receptor TRKC)<br/>KIAA1556 protein</p>             |
|     | 2dkuA<br>(103) | 5-41 (37)    | 13-25 (13)   | 315-318 (4) |   |      |      |                    |                    |                                                                                                                                                                          |

|     |                |              |              |             |   |      |      |                    |                    |                                                                                                                                                                                  |
|-----|----------------|--------------|--------------|-------------|---|------|------|--------------------|--------------------|----------------------------------------------------------------------------------------------------------------------------------------------------------------------------------|
| 507 | 1wvcA<br>(105) | 310-318 (9)  | 310-318 (9)  | 312-318 (7) | N | 0.37 | 2.31 | 86.67%<br>(91/105) | 10.48%<br>(11/105) | 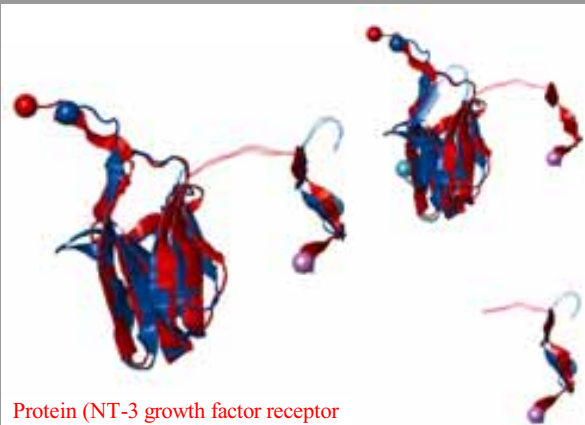 <p>Protein (NT-3 growth factor receptor TRKC)<br/>Bence-jones protein RHE (light chain)</p>   |
|     | 2rheA<br>(114) | 10-17 (8)    | 10-17 (8)    | 312-318 (7) |   |      |      |                    |                    |                                                                                                                                                                                  |
| 508 | 1wvcA<br>(105) | 309-330 (22) | 309-319 (11) | 318-319 (2) | N | 0.46 | 2.02 | 86.00%<br>(86/100) | 12.00%<br>(12/100) |  <p>Protein (NT-3 growth factor receptor TRKC)<br/>Myosin-binding protein C, slow-type</p>    |
|     | 2yuvA<br>(100) | 12-36 (25)   | 12-26 (15)   | 318-319 (2) |   |      |      |                    |                    |                                                                                                                                                                                  |
| 509 | 1wvcA<br>(105) | 304-320 (17) | 304-318 (15) | 316-318 (3) | N | 0.46 | 1.94 | 86.67%<br>(91/105) | 8.57%<br>(9/105)   |  <p>Protein (NT-3 growth factor receptor TRKC)<br/>New antigen receptor variable domain</p> |
|     | 2ywyA<br>(113) | 2-19 (18)    | 2-17 (16)    | 316-318 (3) |   |      |      |                    |                    |                                                                                                                                                                                  |

|     |                |              |              |              |   |      |      |                     |                    |                                                                                                                                                                               |
|-----|----------------|--------------|--------------|--------------|---|------|------|---------------------|--------------------|-------------------------------------------------------------------------------------------------------------------------------------------------------------------------------|
| 510 | 1wwcA<br>(105) | 304-333 (30) | 304-318 (15) | 316-318 (3)  | N | 0.47 | 1.93 | 86.67%<br>(91/105)  | 8.57%<br>(9/105)   | 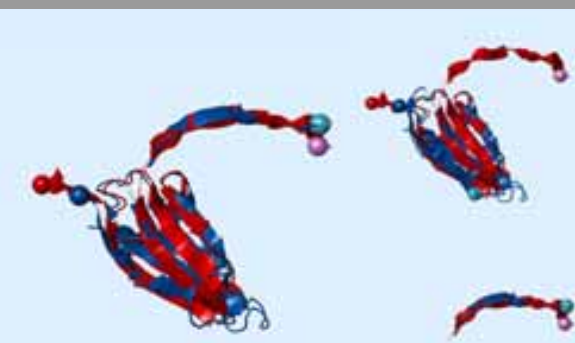 <p>Protein (NT-3 growth factor receptor TRKC)<br/>New antigen receptor variable domain</p> |
|     | 2ywzA<br>(111) | 2-34 (33)    | 2-17 (16)    | 316-318 (3)  |   |      |      |                     |                    |                                                                                                                                                                               |
| 511 | 1wwrA<br>(154) | 100-131 (32) | 100-130 (31) | 104-124 (21) | C | 0.58 | 1.56 | 86.36%<br>(133/154) | 29.87%<br>(46/154) |  <p>TRNA adenosine deaminase TadA<br/>Guanine deaminase</p>                                |
|     | 1wkqB<br>(155) | 101-136 (36) | 101-135 (35) | 104-124 (21) |   |      |      |                     |                    |                                                                                                                                                                               |
| 512 | 1wwrA<br>(154) | 90-135 (46)  | 99-118 (20)  | 90-116 (27)  | C | 0.32 | 2.80 | 80.28%<br>(114/142) | 14.08%<br>(20/142) |  <p>TRNA adenosine deaminase TadA<br/>Putative blasticidin S deaminase</p>               |
|     | 3b8fB<br>(142) | 97-128 (32)  | 106-109 (4)  | 90-116 (27)  |   |      |      |                     |                    |                                                                                                                                                                               |

|     |                |              |              |             |   |      |      |                     |                    |                                                                                                                                                              |
|-----|----------------|--------------|--------------|-------------|---|------|------|---------------------|--------------------|--------------------------------------------------------------------------------------------------------------------------------------------------------------|
| 513 | 1wwrA<br>(154) | 90-135 (46)  | 99-133 (35)  | 97-116 (20) | C | 0.31 | 2.88 | 81.43%<br>(114/140) | 14.29%<br>(20/140) | 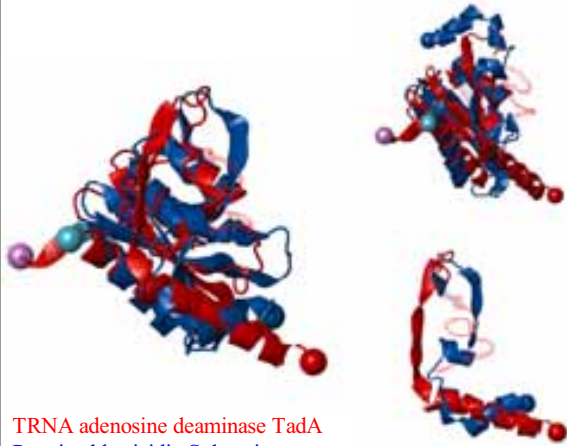 <p>TRNA adenosine deaminase TadA<br/>Putative blasticidin S deaminase</p> |
|     | 3b8fC<br>(140) | 97-128 (32)  | 106-126 (21) | 97-116 (20) |   |      |      |                     |                    |                                                                                                                                                              |
| 514 | 1wwzA<br>(157) | 138-150 (13) | 138-149 (12) | 146-147 (2) | C | 0.46 | 2.54 | 91.33%<br>(137/150) | 18.00%<br>(27/150) |  <p>Hypothetical protein PH1933<br/>HPA2 histone acetyltransferase</p>   |
|     | 1qsmA<br>(150) | 141-148 (8)  | 141-147 (7)  | 146-147 (2) |   |      |      |                     |                    |                                                                                                                                                              |
| 515 | 1wwzA<br>(157) | 138-152 (18) | 138-152 (15) | 146-147 (2) | C | 0.46 | 2.74 | 93.96%<br>(140/149) | 19.46%<br>(29/149) |  <p>Hypothetical protein PH1933<br/>HPA2 histone acetyltransferase</p>  |
|     | 1qsmB<br>(149) | 138-155 (18) | 141-155 (15) | 146-147 (2) |   |      |      |                     |                    |                                                                                                                                                              |

|     |                |              |              |             |   |      |      |                     |                    |                                                                                                                                                                  |
|-----|----------------|--------------|--------------|-------------|---|------|------|---------------------|--------------------|------------------------------------------------------------------------------------------------------------------------------------------------------------------|
| 516 | 1wwzA<br>(157) | 138-149 (12) | 140-149 (10) | 140-148 (9) | C | 0.47 | 2.68 | 93.42%<br>(142/152) | 19.74%<br>(30/152) |  <p>Hypothetical protein PH1933<br/>HPA2 histone acetyltransferase</p>         |
|     | 1qsmD<br>(152) | 141-147 (7)  | 143-147 (5)  | 140-148 (9) |   |      |      |                     |                    |                                                                                                                                                                  |
| 517 | 1wwzA<br>(157) | 144-150 (7)  | 144-150 (7)  | 145-148 (4) | C | 0.52 | 2.44 | 96.55%<br>(140/145) | 12.41%<br>(18/145) |  <p>Hypothetical protein PH1933<br/>Aminoglycoside 6'-N-acetyltransferase</p> |
|     | 1s3zB<br>(145) | 135-138 (4)  | 135-138 (4)  | 145-148 (4) |   |      |      |                     |                    |                                                                                                                                                                  |
| 518 | 1wwzA<br>(157) | 143-153 (11) | 143-149 (7)  | 143-149 (7) | C | 0.49 | 2.32 | 90.67%<br>(136/150) | 17.33%<br>(26/150) |  <p>Hypothetical protein PH1933<br/>Transcriptional regulator</p>           |
|     | 1z4eA<br>(150) | 144-149 (6)  | 144-145 (2)  | 143-149 (7) |   |      |      |                     |                    |                                                                                                                                                                  |

|     |                |              |              |              |   |      |      |                     |                    |                                                                                                                                                                                             |
|-----|----------------|--------------|--------------|--------------|---|------|------|---------------------|--------------------|---------------------------------------------------------------------------------------------------------------------------------------------------------------------------------------------|
| 519 | 1wwzA<br>(157) | 143-150 (8)  | 143-150 (8)  | 144-149 (6)  | C | 0.46 | 2.31 | 89.17%<br>(140/157) | 15.29%<br>(24/157) |  <p>Hypothetical protein PH1933<br/>Diamine acetyltransferase 1</p>                                      |
|     | 2g3tA<br>(169) | 147-154 (8)  | 147-154 (8)  | 144-149 (6)  |   |      |      |                     |                    |                                                                                                                                                                                             |
| 520 | 1wx7A<br>(106) | 2-20 (19)    | 2-19 (18)    | 12-16 (5)    | N | 0.47 | 1.93 | 96.88%<br>(93/96)   | 35.42%<br>(34/96)  |  <p>Ubiquilin 3<br/>Riken cDNA 4931431F19</p>                                                            |
|     | 1wx8A<br>(96)  | 3-20 (18)    | 3-19 (17)    | 12-16 (5)    |   |      |      |                     |                    |                                                                                                                                                                                             |
| 521 | 1yghA<br>(164) | 228-254 (27) | 228-253 (26) | 229-247 (19) | C | 0.32 | 2.43 | 75.78%<br>(122/161) | 11.18%<br>(18/161) |  <p>Protein (transcriptional activator<br/>GCN5)<br/>Glucosamine-phosphate<br/>N-acetyltransferase</p> |
|     | 1ildD<br>(161) | 150-158 (9)  | 150-157 (8)  | 229-247 (19) |   |      |      |                     |                    |                                                                                                                                                                                             |

|     |                |              |              |              |   |      |      |                     |                    |                                                                                                                                                                          |
|-----|----------------|--------------|--------------|--------------|---|------|------|---------------------|--------------------|--------------------------------------------------------------------------------------------------------------------------------------------------------------------------|
| 522 | lyghA<br>(164) | 223-257 (33) | 228-249 (22) | 229-247 (19) | C | 0.44 | 2.33 | 89.66%<br>(130/145) | 8.28%<br>(12/145)  | 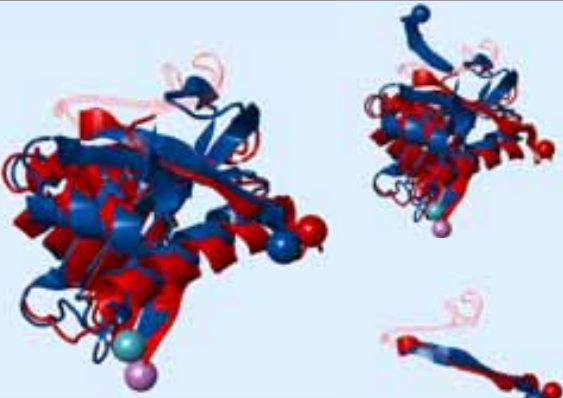<br>Protein (transcriptional activator GCN5)<br>Aminoglycoside 6'-N-acetyltransferase  |
|     | 1s3zB<br>(145) | 131-144 (14) | 134-137 (4)  | 229-247 (19) |   |      |      |                     |                    |                                                                                                                                                                          |
| 523 | lyghA<br>(164) | 227-257 (31) | 228-249 (22) | 229-247 (19) | C | 0.42 | 2.32 | 84.31%<br>(129/153) | 7.19%<br>(11/153)  | <br>Protein (transcriptional activator GCN5)<br>Aminoglycoside 6'-N-acetyltransferase |
|     | 1s5kA<br>(153) | 133-144 (12) | 134-137 (4)  | 229-247 (19) |   |      |      |                     |                    |                                                                                                                                                                          |
| 524 | lyghA<br>(164) | 228-253 (26) | 228-249 (22) | 228-244 (17) | C | 0.39 | 2.41 | 82.58%<br>(128/155) | 10.97%<br>(17/155) | <br>Protein (transcriptional activator GCN5)<br>YYCN protein                        |
|     | 1ufhA<br>(155) | 147-155 (9)  | 147-151 (5)  | 228-244 (17) |   |      |      |                     |                    |                                                                                                                                                                          |

|     |                |              |              |              |   |      |      |                     |                    |                                                                                                                                                                                                                                                             |
|-----|----------------|--------------|--------------|--------------|---|------|------|---------------------|--------------------|-------------------------------------------------------------------------------------------------------------------------------------------------------------------------------------------------------------------------------------------------------------|
| 525 | lyghA<br>(164) | 228-253 (26) | 228-249 (22) | 228-244 (17) | C | 0.42 | 2.25 | 83.77%<br>(129/154) | 11.04%<br>(17/154) |   <p>Protein (transcriptional activator GCN5)<br/>YYCN protein</p>                      |
|     | lufhB<br>(154) | 147-155 (9)  | 147-151 (5)  | 228-244 (17) |   |      |      |                     |                    |                                                                                                                                                                                                                                                             |
| 526 | lyghA<br>(164) | 224-251 (28) | 224-250 (27) | 230-248 (19) | C | 0.38 | 2.58 | 91.54%<br>(119/130) | 7.69%<br>(10/130)  |   <p>Protein (transcriptional activator GCN5)<br/>Hypothetical protein TTHA1254</p>  |
|     | 2d4pA<br>(130) | 113-123 (11) | 113-122 (10) | 230-248 (19) |   |      |      |                     |                    |                                                                                                                                                                                                                                                             |
| 527 | lyghA<br>(164) | 226-248 (23) | 228-248 (21) | 228-248 (21) | C | 0.41 | 2.36 | 82.93%<br>(136/164) | 9.15%<br>(15/164)  |   <p>Protein (transcriptional activator GCN5)<br/>Diamine acetyltransferase 1</p> |
|     | 2f5iA<br>(167) | 145-153 (9)  | 147-153 (7)  | 228-248 (21) |   |      |      |                     |                    |                                                                                                                                                                                                                                                             |



|     |                |              |              |              |   |      |      |                     |                    |                                                                                                                                                                                               |
|-----|----------------|--------------|--------------|--------------|---|------|------|---------------------|--------------------|-----------------------------------------------------------------------------------------------------------------------------------------------------------------------------------------------|
| 528 | 1yghA<br>(164) | 223-259 (35) | 228-243 (16) | 228-250 (23) | C | 0.39 | 2.48 | 83.54%<br>(137/164) | 10.37%<br>(17/164) | 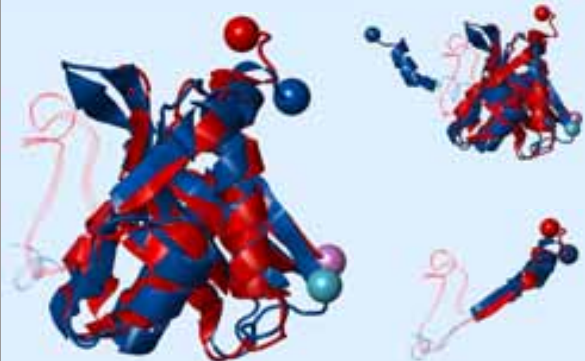 <p>Protein (transcriptional activator<br/>GCN5)<br/>Diamine acetyltransferase 1</p>                       |
|     | 2g3tA<br>(169) | 144-170 (27) | 147-150 (4)  | 228-250 (23) |   |      |      |                     |                    |                                                                                                                                                                                               |
| 529 | 1yghA<br>(164) | 221-248 (28) | 228-248 (21) | 228-248 (21) | C | 0.41 | 2.35 | 82.93%<br>(136/164) | 9.15%<br>(15/164)  |  <p>Protein (transcriptional activator<br/>GCN5)<br/>Diamine acetyltransferase 1</p>                       |
|     | 2g3tB<br>(168) | 140-153 (14) | 147-153 (7)  | 228-248 (21) |   |      |      |                     |                    |                                                                                                                                                                                               |
| 530 | 1yghA<br>(164) | 228-254 (27) | 228-250 (23) | 229-246 (18) | C | 0.30 | 2.43 | 75.00%<br>(123/164) | 10.37%<br>(17/164) |  <p>Protein (transcriptional activator<br/>GCN5)<br/>Glucosamine 6-phosphate<br/>N-acetyltransferase</p> |
|     | 2o28B<br>(180) | 172-181 (10) | 172-177 (6)  | 229-246 (18) |   |      |      |                     |                    |                                                                                                                                                                                               |

|     |                |              |              |              |   |      |      |                     |                    |                                                                                                                                                                                   |
|-----|----------------|--------------|--------------|--------------|---|------|------|---------------------|--------------------|-----------------------------------------------------------------------------------------------------------------------------------------------------------------------------------|
| 531 | 1yghA<br>(164) | 227-257 (31) | 228-249 (22) | 229-247 (19) | C | 0.43 | 2.37 | 89.58%<br>(129/144) | 8.33%<br>(12/144)  |  <p>Protein (transcriptional activator GCN5)<br/>Aminoglycoside 6'-N-acetyltransferase</p>      |
|     | 2vbqB<br>(144) | 133-144 (12) | 134-137 (4)  | 229-247 (19) |   |      |      |                     |                    |                                                                                                                                                                                   |
| 532 | 1yghA<br>(164) | 228-254 (27) | 228-250 (23) | 229-247 (19) | C | 0.33 | 2.28 | 73.78%<br>(121/164) | 10.37%<br>(17/164) |  <p>Protein (transcriptional activator GCN5)<br/>Glucosamine 6-phosphate acetyltransferase</p> |
|     | 2vxkA<br>(165) | 181-189 (9)  | 181-185 (5)  | 229-247 (19) |   |      |      |                     |                    |                                                                                                                                                                                   |
| 533 | 1yk3A<br>(198) | 186-198 (13) | 188-198 (11) | 192-193 (2)  | C | 0.40 | 2.61 | 97.93%<br>(142/145) | 12.41%<br>(18/145) |  <p>Hypothetical protein rv1347c/mt1389<br/>Aminoglycoside 6'-N-acetyltransferase</p>        |
|     | 1s3zB<br>(145) | 133-144 (12) | 135-144 (10) | 192-193 (2)  |   |      |      |                     |                    |                                                                                                                                                                                   |

|     |                |              |              |              |   |      |      |                     |                    |                                                                                                                                                                             |
|-----|----------------|--------------|--------------|--------------|---|------|------|---------------------|--------------------|-----------------------------------------------------------------------------------------------------------------------------------------------------------------------------|
| 534 | 1yk3A<br>(198) | 183-201 (19) | 192-201 (10) | 192-197 (6)  | C | 0.40 | 2.58 | 94.77%<br>(145/153) | 13.07%<br>(20/153) |         |
|     | 1s5kA<br>(153) | 130-144 (15) | 139-144 (6)  | 192-197 (6)  |   |      |      |                     |                    |                                                                                                                                                                             |
| 535 | 1yk3A<br>(198) | 186-198 (13) | 192-198 (7)  | 192-193 (2)  | C | 0.40 | 2.60 | 97.92%<br>(141/144) | 13.19%<br>(19/144) |       |
|     | 2vbqB<br>(144) | 133-144 (12) | 139-144 (6)  | 192-193 (2)  |   |      |      |                     |                    |                                                                                                                                                                             |
| 536 | 1yr0A<br>(163) | 143-160 (18) | 144-160 (17) | 146-159 (14) | C | 0.54 | 2.04 | 94.48%<br>(137/145) | 16.55%<br>(24/145) |   |
|     | 1s3zB<br>(145) | 135-139 (5)  | 136-139 (4)  | 146-159 (14) |   |      |      |                     |                    |                                                                                                                                                                             |

|     |                |              |              |              |   |      |      |                     |                    |                                                                                                                                                                        |
|-----|----------------|--------------|--------------|--------------|---|------|------|---------------------|--------------------|------------------------------------------------------------------------------------------------------------------------------------------------------------------------|
| 537 | 1yr0A<br>(163) | 144-160 (17) | 144-160 (17) | 146-159 (14) | C | 0.52 | 2.02 | 89.54%<br>(137/153) | 16.99%<br>(26/153) |  <p>Phosphinothricin acetyltransferase<br/>Aminoglycoside 6'-N-acetyltransferase</p> |
|     | 1s5kA<br>(153) | 136-139 (4)  | 136-139 (4)  | 146-159 (14) |   |      |      |                     |                    |                                                                                                                                                                        |
| 538 | 1yr0A<br>(163) | 142-159 (18) | 142-159 (18) | 143-158 (16) | C | 0.52 | 2.05 | 90.67%<br>(136/150) | 19.33%<br>(29/150) |  <p>Phosphinothricin acetyltransferase<br/>Transcriptional regulator</p>           |
|     | 1z4eA<br>(150) | 144-147 (4)  | 144-147 (4)  | 143-158 (16) |   |      |      |                     |                    |                                                                                                                                                                        |
| 539 | 1yr0A<br>(163) | 142-165 (24) | 142-155 (14) | 144-155 (12) | C | 0.50 | 2.22 | 88.96%<br>(145/163) | 16.56%<br>(27/163) |  <p>Phosphinothricin acetyltransferase<br/>Diamine acetyltransferase 1</p>        |
|     | 2f5iA<br>(167) | 147-168 (22) | 147-153 (7)  | 144-155 (12) |   |      |      |                     |                    |                                                                                                                                                                        |

|     |                |              |              |              |   |      |      |                     |                    |                                                                                                                                                                           |
|-----|----------------|--------------|--------------|--------------|---|------|------|---------------------|--------------------|---------------------------------------------------------------------------------------------------------------------------------------------------------------------------|
| 540 | 1yr0A<br>(163) | 142-165 (24) | 142-165 (24) | 144-157 (14) | C | 0.49 | 2.21 | 88.34%<br>(144/163) | 16.56%<br>(27/163) | 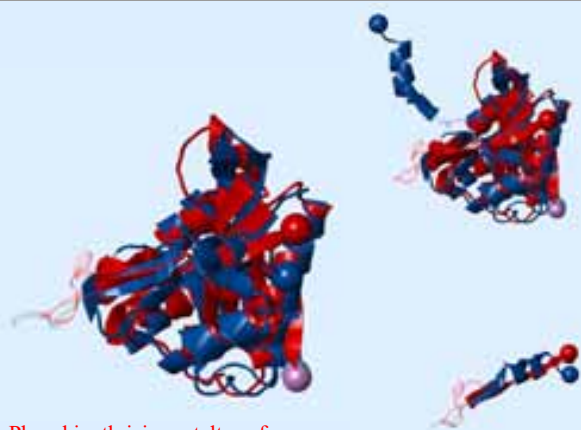 <p>Phosphinothricin acetyltransferase<br/>Diamine acetyltransferase 1</p>              |
|     | 2g3tA<br>(169) | 147-169 (23) | 147-169 (23) | 144-157 (14) |   |      |      |                     |                    |                                                                                                                                                                           |
| 541 | 1yr0A<br>(163) | 142-155 (14) | 142-155 (14) | 144-155 (12) | C | 0.51 | 2.11 | 88.34%<br>(144/163) | 15.95%<br>(26/163) |  <p>Phosphinothricin acetyltransferase<br/>Diamine acetyltransferase 1</p>             |
|     | 2g3tB<br>(168) | 147-153 (7)  | 147-153 (7)  | 144-155 (12) |   |      |      |                     |                    |                                                                                                                                                                           |
| 542 | 1yr0A<br>(163) | 144-160 (17) | 144-160 (17) | 146-159 (14) | C | 0.53 | 2.13 | 93.88%<br>(138/147) | 17.01%<br>(25/147) |  <p>Phosphinothricin acetyltransferase<br/>Aminoglycoside 6'-N-acetyltransferase</p> |
|     | 2vbqA<br>(147) | 136-139 (4)  | 136-139 (4)  | 146-159 (14) |   |      |      |                     |                    |                                                                                                                                                                           |

|     |                |              |              |              |   |      |      |                     |                    |                                                                                                                                                                                                                                                           |
|-----|----------------|--------------|--------------|--------------|---|------|------|---------------------|--------------------|-----------------------------------------------------------------------------------------------------------------------------------------------------------------------------------------------------------------------------------------------------------|
| 543 | 1yr0A<br>(163) | 143-153 (11) | 143-153 (11) | 145-146 (2)  | C | 0.38 | 2.32 | 82.21%<br>(134/163) | 14.72%<br>(24/163) | 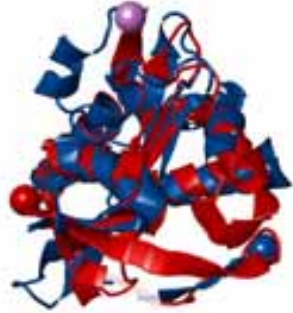 <br>Phosphinothricin acetyltransferase<br>Glucosamine 6-phosphate acetyltransferase |
|     | 2vxkA<br>(165) | 182-189 (8)  | 182-189 (8)  | 145-146 (2)  |   |      |      |                     |                    |                                                                                                                                                                                                                                                           |
| 544 | 1yvoA<br>(169) | 141-156 (16) | 141-156 (16) | 143-154 (12) | C | 0.45 | 1.92 | 90.67%<br>(136/150) | 18.67%<br>(28/150) |  <br>Conserved hypothetical protein<br>Transcriptional regulator                    |
|     | 1z4eA<br>(150) | 144-148 (5)  | 144-148 (5)  | 143-154 (12) |   |      |      |                     |                    |                                                                                                                                                                                                                                                           |
| 545 | 1yvoA<br>(169) | 141-169 (29) | 141-157 (17) | 142-157 (16) | C | 0.47 | 2.35 | 88.02%<br>(147/167) | 17.96%<br>(30/167) |  <br>Conserved hypothetical protein<br>Diamine acetyltransferase 1              |
|     | 2f5iA<br>(167) | 147-168 (22) | 147-154 (8)  | 142-157 (16) |   |      |      |                     |                    |                                                                                                                                                                                                                                                           |

|     |                |              |              |              |   |      |      |                     |                    |                                                                                                                                                             |
|-----|----------------|--------------|--------------|--------------|---|------|------|---------------------|--------------------|-------------------------------------------------------------------------------------------------------------------------------------------------------------|
| 546 | 1yvoA<br>(169) | 142-156 (15) | 142-156 (15) | 142-156 (15) | C | 0.47 | 2.38 | 87.95%<br>(146/166) | 18.07%<br>(30/166) | 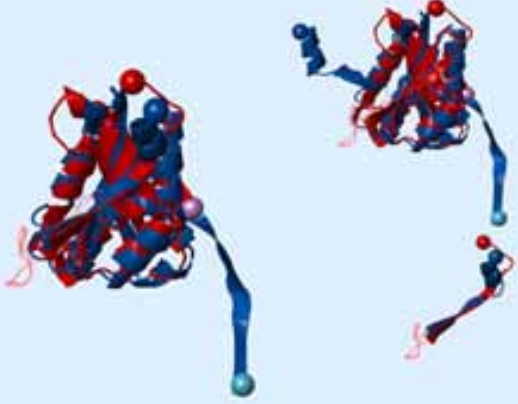 <p>Conserved hypothetical protein<br/>Probable N-acetyltransferase</p>   |
|     | 2fe7B<br>(166) | 140-142 (3)  | 140-142 (3)  | 142-156 (15) |   |      |      |                     |                    |                                                                                                                                                             |
| 547 | 1yvoA<br>(169) | 141-171 (31) | 141-157 (17) | 142-147 (6)  | C | 0.49 | 2.34 | 88.69%<br>(149/168) | 18.45%<br>(31/168) |  <p>Conserved hypothetical protein<br/>Diamine acetyltransferase 1</p>  |
|     | 2g3tB<br>(168) | 147-169 (23) | 147-154 (8)  | 142-147 (6)  |   |      |      |                     |                    |                                                                                                                                                             |
| 548 | 1yvoA<br>(169) | 141-171 (31) | 141-171 (31) | 142-158 (17) | C | 0.48 | 2.30 | 86.98%<br>(147/169) | 17.75%<br>(30/169) |  <p>Conserved hypothetical protein<br/>Diamine acetyltransferase 1</p> |
|     | 2jevA<br>(169) | 147-169 (23) | 147-169 (23) | 142-158 (17) |   |      |      |                     |                    |                                                                                                                                                             |

|     |                |             |            |            |   |      |      |                   |                   |                                                                                                                                       |
|-----|----------------|-------------|------------|------------|---|------|------|-------------------|-------------------|---------------------------------------------------------------------------------------------------------------------------------------|
| 549 | lyvsA<br>(108) | 45-52 (8)   | 45-52 (8)  | 46-52 (7)  | N | 0.39 | 2.48 | 86.32%<br>(82/95) | 22.11%<br>(21/95) | 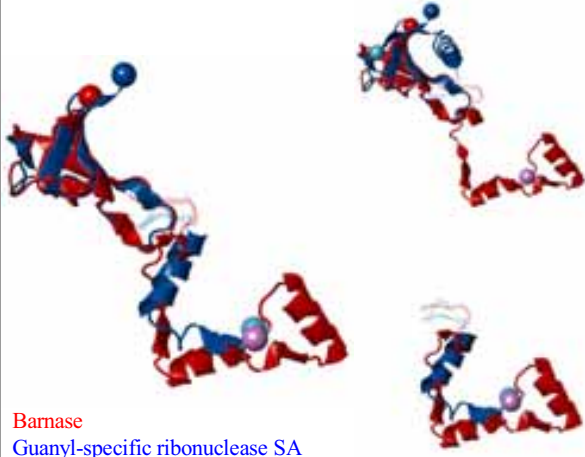 <p>Barnase<br/>Guanyl-specific ribonuclease SA</p> |
|     | lboxA<br>(95)  | 23-33 (11)  | 23-33 (11) | 46-52 (7)  |   |      |      |                   |                   |                                                                                                                                       |
| 550 | lyvsA<br>(108) | 45-109 (65) | 45-58 (14) | 45-54 (10) | N | 0.37 | 2.42 | 83.33%<br>(80/96) | 20.83%<br>(20/96) |  <p>Barnase<br/>Ribonuclease SA</p>               |
|     | lc54A<br>(96)  | 24-92 (69)  | 24-39 (16) | 45-54 (10) |   |      |      |                   |                   |                                                                                                                                       |
| 551 | lyvsA<br>(108) | 45-52 (8)   | 46-52 (7)  | 45-52 (8)  | N | 0.41 | 2.16 | 83.33%<br>(80/96) | 20.83%<br>(20/96) |  <p>Barnase<br/>Ribonuclease SA</p>              |
|     | lgmpA<br>(96)  | 24-33 (10)  | 25-33 (9)  | 45-52 (8)  |   |      |      |                   |                   |                                                                                                                                       |



|     |                |            |            |            |   |      |      |                    |                    |                                                                                                                                          |
|-----|----------------|------------|------------|------------|---|------|------|--------------------|--------------------|------------------------------------------------------------------------------------------------------------------------------------------|
| 552 | 1yvsA<br>(108) | 26-52 (27) | 28-52 (25) | 26-52 (27) | N | 0.40 | 2.33 | 85.42%<br>(82/96)  | 22.92%<br>(22/96)  |  <p>Barnase<br/>Guanyl-specific ribonuclease SA</p>    |
|     | 1i70A<br>(96)  | 7-33 (27)  | 9-33 (25)  | 26-52 (27) |   |      |      |                    |                    |                                                                                                                                          |
| 553 | 1yvsA<br>(108) | 45-52 (8)  | 45-52 (8)  | 46-52 (7)  | N | 0.40 | 2.27 | 84.38%<br>(81/96)  | 19.79%<br>(19/96)  |  <p>Barnase<br/>Guanyl-specific ribonuclease SA</p>  |
|     | 1i8vA<br>(96)  | 20-33 (14) | 20-33 (14) | 46-52 (7)  |   |      |      |                    |                    |                                                                                                                                          |
| 554 | 1yvsA<br>(108) | 34-54 (21) | 34-53 (20) | 34-54 (21) | N | 0.26 | 2.84 | 75.96%<br>(79/104) | 11.54%<br>(12/104) |  <p>Barnase<br/>Guanyl-specific ribonuclease T1</p> |
|     | 1lovA<br>(104) | 30-40 (11) | 30-39 (10) | 34-54 (21) |   |      |      |                    |                    |                                                                                                                                          |

|     |                |            |            |           |   |      |      |                   |                   |                                                                                                                                          |
|-----|----------------|------------|------------|-----------|---|------|------|-------------------|-------------------|------------------------------------------------------------------------------------------------------------------------------------------|
| 555 | lyvsA<br>(108) | 45-52 (8)  | 45-52 (8)  | 46-52 (7) | N | 0.41 | 2.43 | 86.60%<br>(84/97) | 22.68%<br>(22/97) | 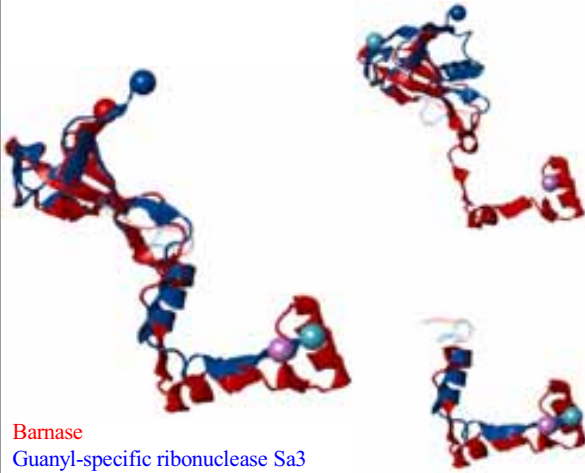 <p>Barnase<br/>Guanyl-specific ribonuclease Sa3</p>   |
|     | lmgrA<br>(97)  | 26-36 (11) | 26-36 (11) | 46-52 (7) |   |      |      |                   |                   |                                                                                                                                          |
| 556 | lyvsA<br>(108) | 45-52 (8)  | 45-52 (8)  | 46-52 (7) | N | 0.40 | 2.43 | 84.85%<br>(84/99) | 22.22%<br>(22/99) |  <p>Barnase<br/>Guanyl-specific ribonuclease Sa3</p> |
|     | lmgwA<br>(99)  | 26-36 (11) | 26-36 (11) | 46-52 (7) |   |      |      |                   |                   |                                                                                                                                          |
| 557 | lyvsA<br>(108) | 26-52 (27) | 45-52 (8)  | 45-52 (8) | N | 0.42 | 2.19 | 85.42%<br>(82/96) | 20.83%<br>(20/96) |  <p>Barnase<br/>Ribonuclease</p>                    |
|     | lpylA<br>(96)  | 9-35 (27)  | 26-35 (10) | 45-52 (8) |   |      |      |                   |                   |                                                                                                                                          |

|     |                |            |            |           |   |      |      |                   |                   |                                                                                                                                          |
|-----|----------------|------------|------------|-----------|---|------|------|-------------------|-------------------|------------------------------------------------------------------------------------------------------------------------------------------|
| 558 | lyvsA<br>(108) | 45-52 (8)  | 45-52 (8)  | 46-52 (7) | N | 0.40 | 2.53 | 87.50%<br>(84/96) | 22.92%<br>(22/96) | 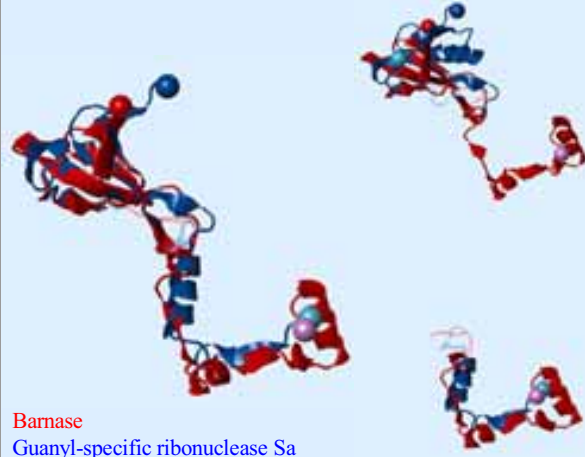 <p>Barnase<br/>Guanyl-specific ribonuclease Sa</p>    |
|     | lt2iA<br>(96)  | 23-33 (11) | 23-33 (11) | 46-52 (7) |   |      |      |                   |                   |                                                                                                                                          |
| 559 | lyvsA<br>(108) | 45-52 (8)  | 46-52 (7)  | 45-52 (8) | N | 0.40 | 2.27 | 84.38%<br>(81/96) | 21.88%<br>(21/96) |  <p>Barnase<br/>Guanyl-specific ribonuclease Sa</p>  |
|     | lucjA<br>(96)  | 24-33 (10) | 25-33 (9)  | 45-52 (8) |   |      |      |                   |                   |                                                                                                                                          |
| 560 | lyvsA<br>(108) | 45-52 (8)  | 46-52 (7)  | 46-52 (7) | N | 0.41 | 2.13 | 83.33%<br>(80/96) | 20.83%<br>(20/96) |  <p>Barnase<br/>Guanyl-specific ribonuclease Sa</p> |
|     | lucjA<br>(96)  | 24-33 (10) | 25-33 (9)  | 46-52 (7) |   |      |      |                   |                   |                                                                                                                                          |

|     |                |              |              |              |   |      |      |                     |                    |                                                                                                                                                      |
|-----|----------------|--------------|--------------|--------------|---|------|------|---------------------|--------------------|------------------------------------------------------------------------------------------------------------------------------------------------------|
| 561 | 1yvsA<br>(108) | 45-52 (8)    | 45-52 (8)    | 46-52 (7)    | N | 0.41 | 2.36 | 86.46%<br>(83/96)   | 21.88%<br>(21/96)  | 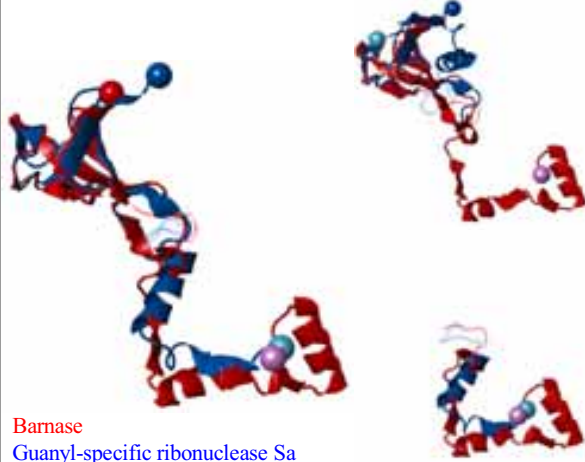 <p>Barnase<br/>Guanyl-specific ribonuclease Sa</p>                |
|     | 1uckA<br>(96)  | 23-33 (11)   | 23-33 (11)   | 46-52 (7)    |   |      |      |                     |                    |                                                                                                                                                      |
| 562 | 1yvsA<br>(108) | 5-54 (50)    | 46-52 (7)    | 30-52 (23)   | N | 0.39 | 2.37 | 84.38%<br>(81/96)   | 21.88%<br>(21/96)  |  <p>Barnase<br/>Guanyl-specific ribonuclease Sa</p>              |
|     | 1ynvX<br>(96)  | 2-35 (34)    | 25-33 (9)    | 30-52 (23)   |   |      |      |                     |                    |                                                                                                                                                      |
| 563 | 1z3aA<br>(156) | 114-150 (37) | 118-150 (33) | 120-142 (23) | C | 0.56 | 1.70 | 86.45%<br>(134/155) | 26.45%<br>(41/155) |  <p>TRNA-specific adenosine deaminase<br/>Guanine deaminase</p> |
|     | 1wkqB<br>(155) | 99-141 (43)  | 103-141 (39) | 120-142 (23) |   |      |      |                     |                    |                                                                                                                                                      |

|     |                |              |              |              |   |      |      |                     |                    |                                                                                                                                                                                |
|-----|----------------|--------------|--------------|--------------|---|------|------|---------------------|--------------------|--------------------------------------------------------------------------------------------------------------------------------------------------------------------------------|
| 564 | 1z4rA<br>(163) | 617-658 (42) | 626-647 (22) | 626-646 (21) | C | 0.44 | 2.19 | 84.87%<br>(129/152) | 14.47%<br>(22/152) |  <p>General control of amino acid<br/>synthesis prote<br/>HPA2 histone acetyltransferase</p> |
|     | 1qsmD<br>(152) | 132-156 (25) | 143-147 (5)  | 626-646 (21) |   |      |      |                     |                    |                                                                                                                                                                                |
| 565 | 1znpA<br>(140) | 4-56 (53)    | 26-40 (15)   | 26-40 (15)   | N | 0.34 | 2.22 | 82.86%<br>(116/140) | 10.71%<br>(15/140) |  <p>Hypothetical protein Atu3615<br/>DTPD-6-deoxy-D-XYLO-4-hexulose<br/>3,5-epimerase</p>   |
|     | 1ep0A<br>(183) | 3-64 (62)    | 31-48 (18)   | 26-40 (15)   |   |      |      |                     |                    |                                                                                                                                                                                |
| 566 | 1znpA<br>(140) | 4-44 (41)    | 4-44 (41)    | 36-40 (5)    | N | 0.30 | 2.23 | 84.29%<br>(118/140) | 8.57%<br>(12/140)  |  <p>Hypothetical protein Atu3615<br/>RFBC</p>                                             |
|     | 1pm7A<br>(199) | 1-50 (50)    | 1-50 (50)    | 36-40 (5)    |   |      |      |                     |                    |                                                                                                                                                                                |

|     |                |           |           |            |   |      |      |                     |                   |                                                                                                                                                                            |
|-----|----------------|-----------|-----------|------------|---|------|------|---------------------|-------------------|----------------------------------------------------------------------------------------------------------------------------------------------------------------------------|
| 567 | 1znpA<br>(140) | 4-44 (41) | 4-44 (41) | 28-40 (13) | N | 0.31 | 2.21 | 84.29%<br>(118/140) | 8.57%<br>(12/140) | 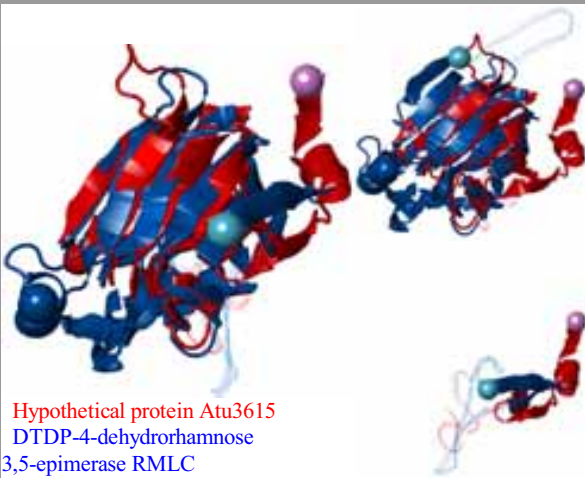 <p>Hypothetical protein Atu3615<br/>DTDP-4-dehydrorhamnose<br/>3,5-epimerase RMLC</p>   |
|     | 2ixcA<br>(198) | 1-50 (50) | 1-50 (50) | 28-40 (13) |   |      |      |                     |                   |                                                                                                                                                                            |
| 568 | 1znpA<br>(140) | 4-44 (41) | 4-40 (37) | 36-40 (5)  | N | 0.29 | 2.24 | 83.57%<br>(117/140) | 6.43%<br>(9/140)  |  <p>Hypothetical protein Atu3615<br/>DTDP-4-dehydrorhamnose<br/>3,5-epimerase</p>      |
|     | 2ixhA<br>(184) | 1-53 (53) | 1-49 (49) | 36-40 (5)  |   |      |      |                     |                   |                                                                                                                                                                            |
| 569 | 1znpA<br>(140) | 4-55 (52) | 4-55 (52) | 26-40 (15) | N | 0.39 | 2.23 | 79.85%<br>(107/134) | 7.46%<br>(10/134) |  <p>Hypothetical protein Atu3615<br/>DTDP-6-deoxy-3,4-keto-hexulose<br/>isomerase</p> |
|     | 2pacB<br>(134) | 2-48 (47) | 2-48 (47) | 26-40 (15) |   |      |      |                     |                   |                                                                                                                                                                            |

|     |                |              |              |              |   |      |      |                     |                    |                                                                                                                                                        |
|-----|----------------|--------------|--------------|--------------|---|------|------|---------------------|--------------------|--------------------------------------------------------------------------------------------------------------------------------------------------------|
| 570 | 1zvnA<br>(99)  | 1-70 (70)    | 1-6 (6)      | 4-5 (2)      | N | 0.28 | 3.18 | 79.80%<br>(79/99)   | 7.07%<br>(7/99)    | <br>MN-cadherin<br>Chagasin                                          |
|     | 2h7wA<br>(108) | 4-82 (79)    | 4-12 (9)     | 4-5 (2)      |   |      |      |                     |                    |                                                                                                                                                        |
| 571 | 2b3jA<br>(151) | 93-135 (43)  | 103-135 (33) | 105-135 (31) | C | 0.56 | 1.84 | 90.07%<br>(136/151) | 29.80%<br>(45/151) | <br>TRNA adenosine deaminase<br>Guanine deaminase                   |
|     | 1wkqA<br>(158) | 93-141 (49)  | 103-141 (39) | 105-135 (31) |   |      |      |                     |                    |                                                                                                                                                        |
| 572 | 2bswA<br>(145) | 125-141 (17) | 126-141 (16) | 127-138 (12) | C | 0.57 | 1.95 | 91.03%<br>(132/145) | 13.79%<br>(20/145) | <br>Glyphosate N-acetyltransferase<br>Putative acetyl transferase |
|     | 1vkcA<br>(149) | 141-146 (6)  | 142-146 (5)  | 127-138 (12) |   |      |      |                     |                    |                                                                                                                                                        |

|     |                |                          |                           |                         |   |      |      |                     |                    |                                                                                                                                                                     |
|-----|----------------|--------------------------|---------------------------|-------------------------|---|------|------|---------------------|--------------------|---------------------------------------------------------------------------------------------------------------------------------------------------------------------|
| 573 | 2bswA<br>(145) | 125-143 (19)             | 126-140 (15)              | 128-136 (9)             | C | 0.55 | 2.05 | 90.34%<br>(131/145) | 14.48%<br>(21/145) | 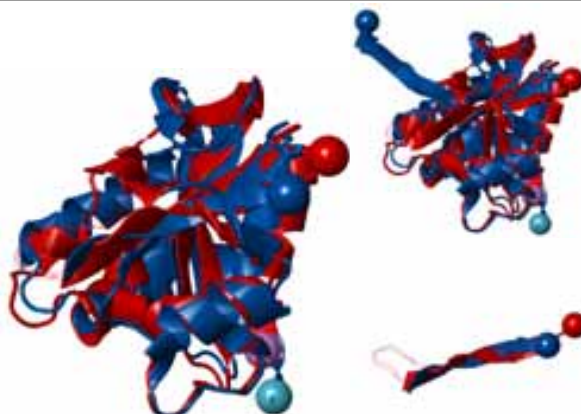 <p>Glyphosate N-acetyltransferase<br/>Aminoglycoside 6'-N-acetyltransferase</p>  |
|     | 2vbqA<br>(147) | 134-144 (11)             | 135-141 (7)               | 128-136 (9)             |   |      |      |                     |                    |                                                                                                                                                                     |
| 574 | 2bswA<br>(145) | 125-142 (18)             | 126-142 (17)              | 128-136 (9)             | C | 0.55 | 2.15 | 91.67%<br>(132/144) | 15.28%<br>(22/144) |  <p>Glyphosate N-acetyltransferase<br/>Aminoglycoside 6'-N-acetyltransferase</p> |
|     | 2vbqB<br>(144) | 134-144 (11)             | 135-144 (10)              | 128-136 (9)             |   |      |      |                     |                    |                                                                                                                                                                     |
| 575 | 2c49A<br>(299) | 3-40 (38),<br>18-42 (25) | 11-23 (13),<br>26-42 (17) | 17-18 (2),<br>37-42 (6) | M | 0.32 | 2.31 | 85.28%<br>(255/299) | 17.39%<br>(52/299) |  <p>Sugar kinase MJ0406<br/>Adenosine kinase</p>                               |
|     | 2i6bB<br>(326) | 3-57 (55),<br>21-63 (43) | 12-29 (18),<br>35-63 (29) | 17-18 (2),<br>37-42 (6) |   |      |      |                     |                    |                                                                                                                                                                     |



|     |                |              |              |              |   |      |      |                     |                    |                                                                                                                                                                                    |
|-----|----------------|--------------|--------------|--------------|---|------|------|---------------------|--------------------|------------------------------------------------------------------------------------------------------------------------------------------------------------------------------------|
| 576 | 2cnmA<br>(151) | 123-143 (21) | 126-143 (18) | 126-137 (12) | C | 0.45 | 1.88 | 90.34%<br>(131/145) | 14.48%<br>(21/145) | 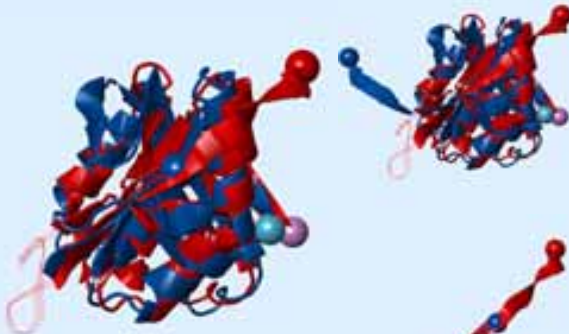 <p>Modification OF 30S ribosomal subunit protein<br/>Aminoglycoside 6'-N-acetyltransferase</p> |
|     | 1s3zB<br>(145) | 135-144 (10) | 138-144 (7)  | 126-137 (12) |   |      |      |                     |                    |                                                                                                                                                                                    |
| 577 | 2cnmA<br>(151) | 118-135 (18) | 121-135 (15) | 126-134 (9)  | C | 0.45 | 2.00 | 89.12%<br>(131/147) | 13.61%<br>(20/147) |  <p>Modification OF 30S ribosomal subunit protein<br/>Aminoglycoside 6'-N-acetyltransferase</p> |
|     | 2vbqA<br>(147) | 130-140 (11) | 134-140 (7)  | 126-134 (9)  |   |      |      |                     |                    |                                                                                                                                                                                    |
| 578 | 2cswA<br>(145) | 104-145 (42) | 108-145 (38) | 126-135 (10) | C | 0.27 | 2.22 | 82.76%<br>(120/145) | 13.79%<br>(20/145) |  <p>Ubiquitin ligase protein RNF8<br/>Protein kinase SPK1</p>                                 |
|     | 1j4kA<br>(158) | 676-730 (55) | 680-730 (51) | 126-135 (10) |   |      |      |                     |                    |                                                                                                                                                                                    |

|     |                |                               |                              |                              |   |      |      |                     |                    |                                                                                                                                                                                                      |
|-----|----------------|-------------------------------|------------------------------|------------------------------|---|------|------|---------------------|--------------------|------------------------------------------------------------------------------------------------------------------------------------------------------------------------------------------------------|
| 579 | 2cu2A<br>(335) | 142-168 (27),<br>149-184 (36) | 143-149 (7),<br>152-182 (31) | 143-149 (7),<br>167-181 (15) | M | 0.35 | 2.39 | 92.76%<br>(205/221) | 18.55%<br>(41/221) | 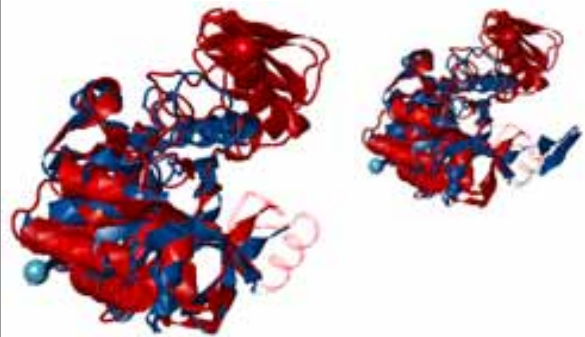 <p>Putative mannose-1-phosphate<br/>guanylyl transfe<br/>2-C-methyl-D-erythritol 4-phosphate<br/>cytidyl</p>      |
|     | 1vpaA<br>(221) | 133-149 (17),<br>135-153 (19) | 134-135 (2),<br>138-151 (14) | 143-149 (7),<br>167-181 (15) |   |      |      |                     |                    |                                                                                                                                                                                                      |
| 580 | 2cu2A<br>(335) | 142-168 (27),<br>149-183 (35) | 142-149 (8),<br>152-181 (30) | 143-149 (7),<br>168-181 (14) | M | 0.34 | 2.44 | 92.73%<br>(204/220) | 16.82%<br>(37/220) |  <p>Putative mannose-1-phosphate<br/>guanylyl transfe<br/>2-C-methyl-D-erythritol 4-phosphate<br/>cytidyl</p>     |
|     | 1vpaB<br>(220) | 133-148 (16),<br>135-152 (18) | 133-135 (3),<br>138-150 (13) | 143-149 (7),<br>168-181 (14) |   |      |      |                     |                    |                                                                                                                                                                                                      |
| 581 | 2e3dA<br>(286) | 159-198 (40),<br>178-224 (47) | 170-178 (9),<br>181-212 (32) | 173-178 (6),<br>197-211 (15) | M | 0.43 | 2.47 | 96.00%<br>(216/225) | 15.11%<br>(34/225) |  <p>UTP--glucose-1-phosphate<br/>uridylyltransferase<br/>4-diphosphocytidyl-<br/>2-C-methylerythritol synth</p> |
|     | 1iniA<br>(225) | 124-153 (30),<br>140-174 (35) | 135-140 (6),<br>143-161 (19) | 173-178 (6),<br>197-211 (15) |   |      |      |                     |                    |                                                                                                                                                                                                      |

|     |                |                               |                               |                              |   |      |      |                     |                    |                                                                                                                                                                                                |
|-----|----------------|-------------------------------|-------------------------------|------------------------------|---|------|------|---------------------|--------------------|------------------------------------------------------------------------------------------------------------------------------------------------------------------------------------------------|
| 582 | 2e3dA<br>(286) | 159-200 (42),<br>177-224 (48) | 172-200 (29),<br>177-212 (36) | 172-177 (6),<br>199-211 (13) | M | 0.44 | 2.35 | 95.93%<br>(212/221) | 14.48%<br>(32/221) | 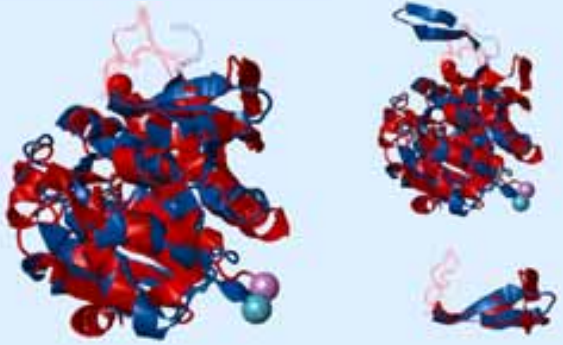 <p>UTP--glucose-1-phosphate<br/>uridylyltransferase<br/>2-C-methyl-D-erythritol 4-phosphate<br/>cytidyl</p> |
|     | 1vpaA<br>(221) | 120-148 (29),<br>133-166 (34) | 132-148 (17),<br>133-153 (21) | 172-177 (6),<br>199-211 (13) |   |      |      |                     |                    |                                                                                                                                                                                                |
| 583 | 2f5gA<br>(130) | 81-121 (41)                   | 81-119 (39)                   | 109-119 (11)                 | C | 0.27 | 2.62 | 72.31%<br>(94/130)  | 5.38%<br>(7/130)   |  <p>Transposase, putative<br/>Hypothetical protein T110078</p>                                              |
|     | 1x0pE<br>(141) | 4067-4104 (38)                | 4067-4102 (36)                | 109-119 (11)                 |   |      |      |                     |                    |                                                                                                                                                                                                |
| 584 | 2fckA<br>(174) | 154-174 (21)                  | 154-174 (21)                  | 159-170 (12)                 | C | 0.34 | 3.06 | 84.62%<br>(143/169) | 11.24%<br>(19/169) |  <p>Ribosomal-protein-serine<br/>acetyltransferase, p<br/>Diamine acetyltransferase 1</p>                 |
|     | 2g3tA<br>(169) | 147-169 (23)                  | 147-169 (23)                  | 159-170 (12)                 |   |      |      |                     |                    |                                                                                                                                                                                                |

|     |                |              |              |              |   |      |      |                     |                    |                                                                                                                                                                             |
|-----|----------------|--------------|--------------|--------------|---|------|------|---------------------|--------------------|-----------------------------------------------------------------------------------------------------------------------------------------------------------------------------|
| 585 | 2fckA<br>(174) | 151-173 (23) | 151-173 (23) | 160-169 (10) | C | 0.29 | 3.04 | 83.43%<br>(141/169) | 9.47%<br>(16/169)  | 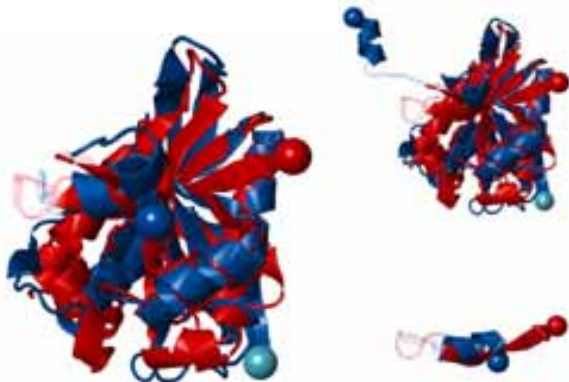 <p>Ribosomal-protein-serine<br/>acetyltransferase, p<br/>Diamine acetyltransferase 1</p> |
|     | 2jevA<br>(169) | 143-169 (27) | 143-169 (27) | 160-169 (10) |   |      |      |                     |                    |                                                                                                                                                                             |
| 586 | 2fiaA<br>(157) | 136-149 (14) | 137-149 (13) | 137-147 (11) | C | 0.43 | 2.43 | 85.06%<br>(131/154) | 14.94%<br>(23/154) |  <p>Acetyltransferase<br/>YYCN protein</p>                                               |
|     | 1ufhB<br>(154) | 149-154 (6)  | 150-154 (5)  | 137-147 (11) |   |      |      |                     |                    |                                                                                                                                                                             |
| 587 | 2fl4A<br>(147) | 27-37 (11)   | 27-37 (11)   | 27-37 (11)   | N | 0.45 | 2.33 | 86.39%<br>(127/147) | 12.24%<br>(18/147) |  <p>Spermine/spermidine<br/>acetyltransferase<br/>HPA2 histone acetyltransferase</p>   |
|     | 1qsmD<br>(152) | 33-43 (11)   | 33-43 (11)   | 27-37 (11)   |   |      |      |                     |                    |                                                                                                                                                                             |

|     |                |              |              |             |   |      |      |                     |                    |                                                                                                                                                                         |
|-----|----------------|--------------|--------------|-------------|---|------|------|---------------------|--------------------|-------------------------------------------------------------------------------------------------------------------------------------------------------------------------|
| 588 | 2fl4A<br>(147) | 119-137 (19) | 126-137 (12) | 133-134 (2) | C | 0.34 | 2.29 | 74.15%<br>(109/147) | 9.52%<br>(14/147)  | 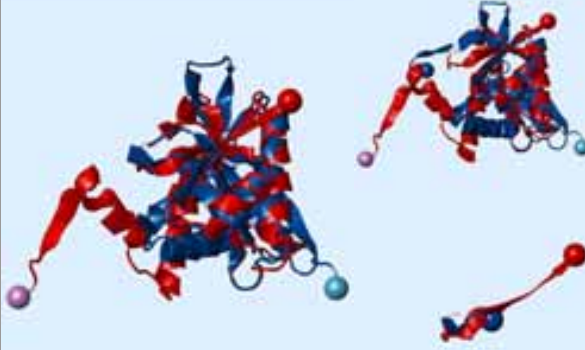 <p>Spermine/spermidine<br/>acetyltransferase<br/>HPA2 histone acetyltransferase</p> |
|     | 1qsmD<br>(152) | 136-152 (17) | 143-152 (10) | 133-134 (2) |   |      |      |                     |                    |                                                                                                                                                                         |
| 589 | 2fl4A<br>(147) | 35-48 (14)   | 38-47 (10)   | 35-44 (10)  | N | 0.42 | 2.47 | 85.71%<br>(126/147) | 14.97%<br>(22/147) |  <p>Spermine/spermidine<br/>acetyltransferase<br/>YYCN protein</p>                   |
|     | 1ufhA<br>(155) | 48-63 (16)   | 50-62 (13)   | 35-44 (10)  |   |      |      |                     |                    |                                                                                                                                                                         |
| 590 | 2fl4A<br>(147) | 130-139 (10) | 130-139 (10) | 130-137 (8) | C | 0.36 | 1.80 | 71.43%<br>(105/147) | 14.97%<br>(22/147) |  <p>Spermine/spermidine<br/>acetyltransferase<br/>YYCN protein</p>                 |
|     | 1ufhA<br>(155) | 148-150 (3)  | 148-150 (3)  | 130-137 (8) |   |      |      |                     |                    |                                                                                                                                                                         |

|     |                |              |              |              |   |      |      |                     |                    |                                                                                                                                                                        |
|-----|----------------|--------------|--------------|--------------|---|------|------|---------------------|--------------------|------------------------------------------------------------------------------------------------------------------------------------------------------------------------|
| 591 | 2fl4A<br>(147) | 35-48 (14)   | 38-48 (11)   | 35-42 (8)    | N | 0.41 | 2.56 | 86.39%<br>(127/147) | 14.29%<br>(21/147) | 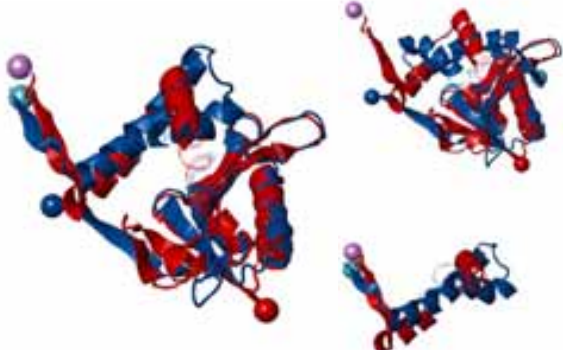 <p>Spermine/spermidine<br/>acetyltransferase<br/>YYCN protein</p>                  |
|     | 1ufhB<br>(154) | 48-63 (16)   | 50-63 (14)   | 35-42 (8)    |   |      |      |                     |                    |                                                                                                                                                                        |
| 592 | 2fl4A<br>(147) | 129-145 (17) | 129-140 (12) | 129-138 (10) | C | 0.34 | 2.14 | 73.47%<br>(108/147) | 13.61%<br>(20/147) |  <p>Spermine/spermidine<br/>acetyltransferase<br/>YYCN protein</p>                  |
|     | 1ufhB<br>(154) | 147-154 (8)  | 147-149 (3)  | 129-138 (10) |   |      |      |                     |                    |                                                                                                                                                                        |
| 593 | 2fl4A<br>(147) | 18-37 (20)   | 18-37 (20)   | 26-37 (12)   | N | 0.39 | 2.56 | 82.31%<br>(121/147) | 11.56%<br>(17/147) |  <p>Spermine/spermidine<br/>acetyltransferase<br/>Putative acetyl transferase</p> |
|     | 1vkcA<br>(149) | 17-45 (29)   | 17-45 (29)   | 26-37 (12)   |   |      |      |                     |                    |                                                                                                                                                                        |

|     |                |              |              |             |   |      |      |                     |                    |                                                                                                                                                                      |
|-----|----------------|--------------|--------------|-------------|---|------|------|---------------------|--------------------|----------------------------------------------------------------------------------------------------------------------------------------------------------------------|
| 594 | 2fl4A<br>(147) | 129-141 (13) | 129-140 (12) | 129-136 (8) | C | 0.34 | 2.38 | 74.83%<br>(110/147) | 12.93%<br>(19/147) | 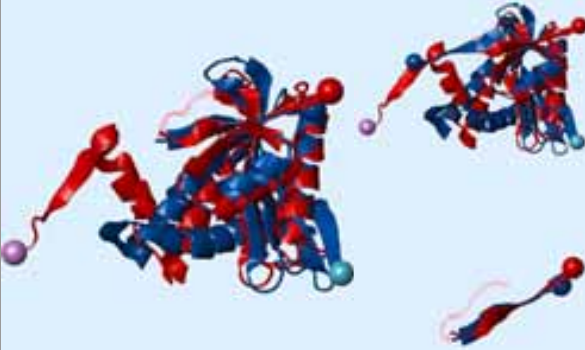 <p>Spermine/spermidine<br/>acetyltransferase<br/>Putative acetyl transferase</p> |
|     | 1vkcA<br>(149) | 141-146 (6)  | 141-145 (5)  | 129-136 (8) |   |      |      |                     |                    |                                                                                                                                                                      |
| 595 | 2fl4A<br>(147) | 29-36 (8)    | 29-36 (8)    | 29-36 (8)   | N | 0.43 | 2.49 | 86.39%<br>(127/147) | 14.29%<br>(21/147) |  <p>Spermine/spermidine<br/>acetyltransferase<br/>Transcriptional regulator</p>   |
|     | 1z4eA<br>(150) | 30-46 (17)   | 30-46 (17)   | 29-36 (8)   |   |      |      |                     |                    |                                                                                                                                                                      |
| 596 | 2fl4A<br>(147) | 128-144 (17) | 129-140 (12) | 131-138 (8) | C | 0.37 | 2.37 | 78.23%<br>(115/147) | 12.93%<br>(19/147) |  <p>Spermine/spermidine<br/>acetyltransferase<br/>Transcriptional regulator</p> |
|     | 1z4eA<br>(150) | 143-152 (10) | 144-148 (5)  | 131-138 (8) |   |      |      |                     |                    |                                                                                                                                                                      |

|     |                |             |             |             |   |      |      |                     |                    |                                                                                                                                                          |
|-----|----------------|-------------|-------------|-------------|---|------|------|---------------------|--------------------|----------------------------------------------------------------------------------------------------------------------------------------------------------|
| 597 | 2fyxA<br>(130) | 112-117 (6) | 112-117 (6) | 112-117 (6) | C | 0.76 | 1.51 | 97.69%<br>(127/130) | 33.08%<br>(43/130) | 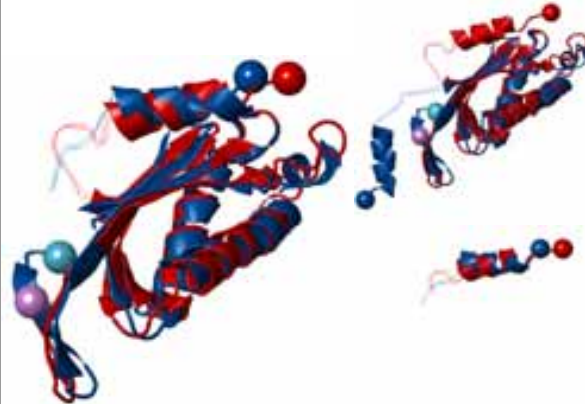 <p>Transposase, putative<br/>ISHp608 transposase</p>                  |
|     | 2a6mA<br>(130) | 116-121 (6) | 116-121 (6) | 112-117 (6) |   |      |      |                     |                    |                                                                                                                                                          |
| 598 | 2fyxA<br>(130) | 111-116 (6) | 111-116 (6) | 111-116 (6) | C | 0.73 | 1.68 | 97.69%<br>(127/130) | 40.00%<br>(52/130) |  <p>Transposase, putative<br/>136aa long hypothetical transposase</p> |
|     | 2ec2A<br>(130) | 112-117 (6) | 112-117 (6) | 111-116 (6) |   |      |      |                     |                    |                                                                                                                                                          |
| 599 | 2fyxA<br>(130) | 111-119 (9) | 112-119 (8) | 112-118 (7) | C | 0.78 | 1.42 | 99.21%<br>(125/126) | 34.13%<br>(43/126) |  <p>Transposase, putative<br/>Transposase ORFA</p>                  |
|     | 2vhgA<br>(126) | 115-123 (9) | 116-123 (8) | 112-118 (7) |   |      |      |                     |                    |                                                                                                                                                          |



|     |                |             |             |             |   |      |      |                     |                    |                                                                                                                                         |
|-----|----------------|-------------|-------------|-------------|---|------|------|---------------------|--------------------|-----------------------------------------------------------------------------------------------------------------------------------------|
| 600 | 2fyxA<br>(130) | 112-115 (4) | 112-115 (4) | 112-115 (4) | C | 0.64 | 1.54 | 96.92%<br>(126/130) | 30.00%<br>(39/130) | 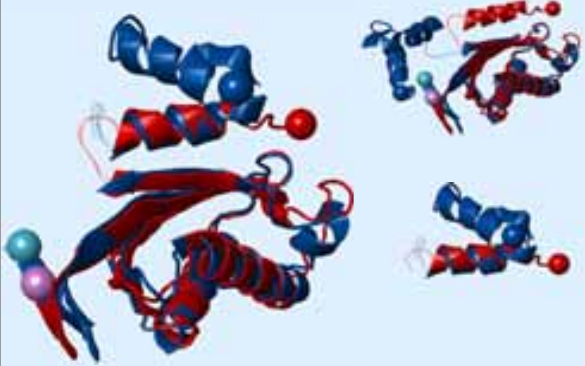 <p>Transposase, putative<br/>Transposase ORFA</p>   |
|     | 2vihA<br>(151) | 116-120 (5) | 116-120 (5) | 112-115 (4) |   |      |      |                     |                    |                                                                                                                                         |
| 601 | 2fyxA<br>(130) | 112-116 (5) | 112-116 (5) | 112-116 (5) | C | 0.74 | 1.51 | 96.90%<br>(125/129) | 33.33%<br>(43/129) |  <p>Transposase, putative<br/>Transposase ORFA</p>   |
|     | 2vihB<br>(129) | 116-120 (5) | 116-120 (5) | 112-116 (5) |   |      |      |                     |                    |                                                                                                                                         |
| 602 | 2fyxA<br>(130) | 112-116 (5) | 112-116 (5) | 112-116 (5) | C | 0.72 | 1.58 | 97.60%<br>(122/125) | 33.60%<br>(42/125) |  <p>Transposase, putative<br/>Transposase ORFA</p> |
|     | 2vjvA<br>(125) | 116-120 (5) | 116-120 (5) | 112-116 (5) |   |      |      |                     |                    |                                                                                                                                         |

|     |                |              |              |              |   |      |      |                     |                    |                                                                                                                                                                                                                                                         |
|-----|----------------|--------------|--------------|--------------|---|------|------|---------------------|--------------------|---------------------------------------------------------------------------------------------------------------------------------------------------------------------------------------------------------------------------------------------------------|
| 603 | 2g84A<br>(189) | 142-158 (17) | 142-150 (9)  | 142-150 (9)  | C | 0.57 | 1.44 | 91.77%<br>(145/158) | 27.22%<br>(43/158) |   <p>Cytidine and deoxycytidylate<br/>deaminase zinc-b<br/>Guanine deaminase</p>  |
|     | 1wkqA<br>(158) | 113-129 (17) | 113-124 (12) | 142-150 (9)  |   |      |      |                     |                    |                                                                                                                                                                                                                                                         |
| 604 | 2gbzA<br>(179) | 135-162 (28) | 139-162 (24) | 139-162 (24) | C | 0.40 | 2.07 | 78.36%<br>(134/171) | 12.87%<br>(22/171) |   <p>Oligoribonuclease<br/>DNA polymerase III polC-type</p>                      |
|     | 2p1jB<br>(171) | 468-503 (36) | 472-503 (32) | 139-162 (24) |   |      |      |                     |                    |                                                                                                                                                                                                                                                         |
| 605 | 2gtvX<br>(104) | 19-33 (15)   | 20-31 (12)   | 21-32 (12)   | N | 0.75 | 1.20 | 100.00%<br>(91/91)  | 31.87%<br>(29/91)  |   <p>Chorismate mutase<br/>ENDO-oxabicyclic transition state<br/>analogue</p> |
|     | 1ecmA<br>(91)  | 21-27 (7)    | 22-25 (4)    | 21-32 (12)   |   |      |      |                     |                    |                                                                                                                                                                                                                                                         |

|     |                |              |              |              |   |      |      |                     |                    |                                                                                                                                                              |
|-----|----------------|--------------|--------------|--------------|---|------|------|---------------------|--------------------|--------------------------------------------------------------------------------------------------------------------------------------------------------------|
| 606 | 2gtvX<br>(104) | 19-32 (14)   | 20-32 (13)   | 21-32 (12)   | N | 0.71 | 1.47 | 97.89%<br>(93/95)   | 27.37%<br>(26/95)  | 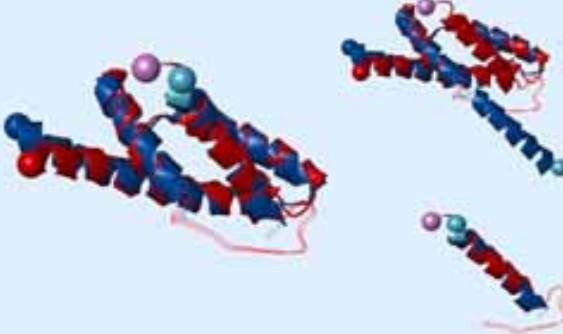 <p>Chorismate mutase<br/>ENDO-oxabicyclic transition state analogue</p>  |
|     | 1ecmB<br>(95)  | 22-26 (5)    | 23-26 (4)    | 21-32 (12)   |   |      |      |                     |                    |                                                                                                                                                              |
| 607 | 2gtvX<br>(104) | 19-33 (15)   | 20-33 (14)   | 21-32 (12)   | N | 0.58 | 1.69 | 89.00%<br>(89/100)  | 16.00%<br>(16/100) |  <p>Chorismate mutase<br/>Salicylate biosynthesis protein pchB</p>        |
|     | 2h9dD<br>(100) | 23-30 (8)    | 24-30 (7)    | 21-32 (12)   |   |      |      |                     |                    |                                                                                                                                                              |
| 608 | 2i79A<br>(171) | 147-166 (20) | 147-166 (20) | 147-159 (13) | C | 0.46 | 2.32 | 86.75%<br>(144/166) | 19.28%<br>(32/166) |  <p>Acetyltransferase, GNAT family<br/>Probable N-acetyltransferase</p> |
|     | 2fe7B<br>(166) | 140-157 (18) | 140-157 (18) | 147-159 (13) |   |      |      |                     |                    |                                                                                                                                                              |

|     |                |              |              |             |   |      |      |                     |                    |                                                                                                                                                                              |
|-----|----------------|--------------|--------------|-------------|---|------|------|---------------------|--------------------|------------------------------------------------------------------------------------------------------------------------------------------------------------------------------|
| 609 | 2i9sA<br>(97)  | 78-96 (19)   | 78-96 (19)   | 91-91 (1)   | C | 0.41 | 2.43 | 82.47%<br>(80/97)   | 6.19%<br>(6/97)    |  <p>Mesoderm development candidate 2<br/>Acylphosphatase</p>                               |
|     | 2acyA<br>(98)  | 65-96 (32)   | 65-96 (32)   | 91-91 (1)   |   |      |      |                     |                    |                                                                                                                                                                              |
| 610 | 2jevA<br>(169) | 146-161 (16) | 147-158 (12) | 148-152 (5) | C | 0.45 | 2.31 | 87.90%<br>(138/157) | 15.92%<br>(25/157) |  <p>Diamine acetyltransferase 1<br/>Hypothetical protein PH1933</p>                      |
|     | 1wwzB<br>(157) | 142-158 (17) | 143-155 (13) | 148-152 (5) |   |      |      |                     |                    |                                                                                                                                                                              |
| 611 | 2jevA<br>(169) | 147-169 (23) | 147-154 (8)  | 148-155 (8) | C | 0.48 | 2.29 | 87.57%<br>(148/169) | 18.34%<br>(31/169) |  <p>Diamine acetyltransferase 1<br/>Acetyltransferase PA4866 FROM P.<br/>aeruginosa</p> |
|     | 2j8mB<br>(170) | 141-171 (31) | 141-157 (17) | 148-155 (8) |   |      |      |                     |                    |                                                                                                                                                                              |

|     |                |              |              |              |   |      |      |                     |                    |                                                                                                                                                                           |
|-----|----------------|--------------|--------------|--------------|---|------|------|---------------------|--------------------|---------------------------------------------------------------------------------------------------------------------------------------------------------------------------|
| 612 | 2jevA<br>(169) | 147-169 (23) | 147-156 (10) | 148-151 (4)  | C | 0.48 | 2.25 | 86.98%<br>(147/169) | 18.34%<br>(31/169) | 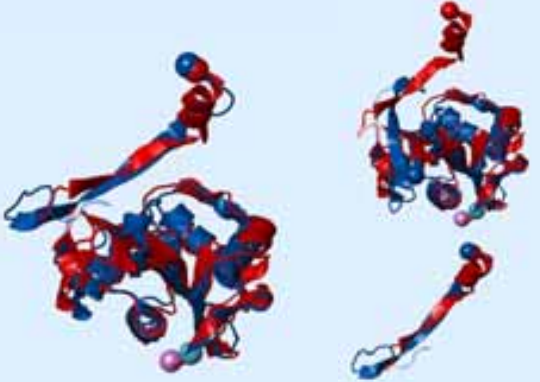 <p>Diamine acetyltransferase 1<br/>Acetyltransferase PA4866 FROM P.<br/>aeruginosa</p> |
|     | 2j8nA<br>(169) | 141-171 (31) | 141-159 (19) | 148-151 (4)  |   |      |      |                     |                    |                                                                                                                                                                           |
| 613 | 2ob0A<br>(154) | 131-153 (23) | 132-150 (19) | 136-149 (14) | C | 0.56 | 1.87 | 91.03%<br>(132/145) | 11.03%<br>(16/145) |  <p>Human MAK3 homolog<br/>Aminoglycoside 6'-N-acetyltransferase</p>                   |
|     | 1s3zB<br>(145) | 134-143 (10) | 135-140 (6)  | 136-149 (14) |   |      |      |                     |                    |                                                                                                                                                                           |
| 614 | 2ob0A<br>(154) | 132-152 (21) | 135-152 (18) | 135-147 (13) | C | 0.54 | 2.00 | 88.89%<br>(136/153) | 10.46%<br>(16/153) |  <p>Human MAK3 homolog<br/>Aminoglycoside 6'-N-acetyltransferase</p>                 |
|     | 1s5kA<br>(153) | 135-143 (9)  | 138-143 (6)  | 135-147 (13) |   |      |      |                     |                    |                                                                                                                                                                           |

|     |                |                               |                              |                             |   |      |      |                     |                    |                                                                                                                                                                             |
|-----|----------------|-------------------------------|------------------------------|-----------------------------|---|------|------|---------------------|--------------------|-----------------------------------------------------------------------------------------------------------------------------------------------------------------------------|
| 615 | 2ob0A<br>(154) | 131-153 (23)                  | 134-148 (15)                 | 134-147 (14)                | C | 0.54 | 2.06 | 91.16%<br>(134/147) | 11.56%<br>(17/147) | 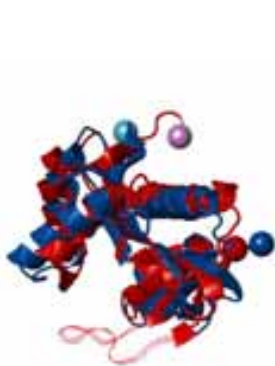        |
|     | 2vbqA<br>(147) | 134-143 (10)                  | 137-138 (2)                  | 134-147 (14)                |   |      |      |                     |                    |                                                                                                                                                                             |
| 616 | 2pa4A<br>(294) | 155-179 (25),<br>182-224 (43) | 171-179 (9),<br>185-217 (33) | 171-178 (8),<br>204-211 (8) | M | 0.45 | 2.27 | 96.00%<br>(216/225) | 15.11%<br>(34/225) |       |
|     | 1i52A<br>(225) | 121-139 (19),<br>142-174 (33) | 137-139 (3),<br>145-166 (22) | 171-178 (8),<br>204-211 (8) |   |      |      |                     |                    |                                                                                                                                                                             |
| 617 | 2pa7A<br>(135) | 19-35 (37)                    | 19-48 (30)                   | 23-32 (10)                  | N | 0.31 | 2.42 | 83.70%<br>(113/135) | 15.56%<br>(21/135) |   |
|     | 1j3qA<br>(187) | 56-97 (42)                    | 56-88 (33)                   | 23-32 (10)                  |   |      |      |                     |                    |                                                                                                                                                                             |

|     |                |              |              |             |   |      |      |                     |                    |                                                                                                                                                                               |
|-----|----------------|--------------|--------------|-------------|---|------|------|---------------------|--------------------|-------------------------------------------------------------------------------------------------------------------------------------------------------------------------------|
| 618 | 2pa7A<br>(135) | 2-55 (54)    | 19-55 (37)   | 23-32 (10)  | N | 0.32 | 2.37 | 83.70%<br>(113/135) | 15.56%<br>(21/135) | 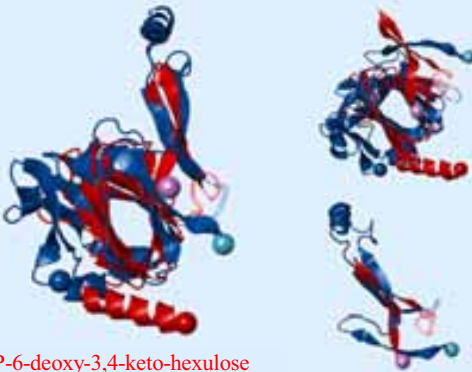<br>DTDP-6-deoxy-3,4-keto-hexulose<br>isomerase<br>Phosphoglucose isomerase                |
|     | lj3rB<br>(185) | 3-97 (95)    | 56-97 (42)   | 23-32 (10)  |   |      |      |                     |                    |                                                                                                                                                                               |
| 619 | 2pa7A<br>(135) | 2-55 (54)    | 21-55 (35)   | 23-32 (10)  | N | 0.31 | 2.43 | 83.70%<br>(113/135) | 14.07%<br>(19/135) | <br>DTDP-6-deoxy-3,4-keto-hexulose<br>isomerase<br>Glucose-6-phosphate isomerase           |
|     | lqxrA<br>(187) | 1-96 (96)    | 57-96 (40)   | 23-32 (10)  |   |      |      |                     |                    |                                                                                                                                                                               |
| 620 | 2pa7A<br>(135) | 109-129 (21) | 112-125 (14) | 122-123 (2) | C | 0.27 | 1.88 | 70.37%<br>(95/135)  | 10.37%<br>(14/135) | <br>DTDP-6-deoxy-3,4-keto-hexulose<br>isomerase<br>3-hydroxyanthranilate 3,4-dioxygenase |
|     | lzvfA<br>(176) | 110-150 (41) | 112-146 (35) | 122-123 (2) |   |      |      |                     |                    |                                                                                                                                                                               |

|     |                |              |              |             |   |      |      |                     |                    |                                                                                                                                                                        |
|-----|----------------|--------------|--------------|-------------|---|------|------|---------------------|--------------------|------------------------------------------------------------------------------------------------------------------------------------------------------------------------|
| 621 | 2pa7A<br>(135) | 16-65 (50)   | 21-33 (13)   | 21-32 (12)  | N | 0.25 | 2.52 | 85.93%<br>(116/135) | 13.33%<br>(18/135) |  <p>DTDP-6-deoxy-3,4-keto-hexulose isomerase<br/>Cysteine dioxygenase type I</p>     |
|     | 2b5hA<br>(186) | 57-102 (46)  | 62-71 (10)   | 21-32 (12)  |   |      |      |                     |                    |                                                                                                                                                                        |
| 622 | 2pa7A<br>(135) | 19-55 (37)   | 23-55 (33)   | 19-32 (14)  | N | 0.30 | 2.49 | 83.70%<br>(113/135) | 13.33%<br>(18/135) |  <p>DTDP-6-deoxy-3,4-keto-hexulose isomerase<br/>Glucose-6-phosphate isomerase</p> |
|     | 2gc1A<br>(188) | 55-96 (42)   | 59-96 (38)   | 19-32 (14)  |   |      |      |                     |                    |                                                                                                                                                                        |
| 623 | 2pc1A<br>(173) | 149-159 (11) | 149-158 (10) | 151-157 (7) | C | 0.48 | 2.23 | 94.48%<br>(137/145) | 15.86%<br>(23/145) |  <p>Acetyltransferase, GNAT family<br/>Aminoglycoside 6'-N-acetyltransferase</p>  |
|     | 1s3zB<br>(145) | 135-139 (5)  | 135-138 (4)  | 151-157 (7) |   |      |      |                     |                    |                                                                                                                                                                        |



|     |                |              |              |             |   |      |      |                     |                    |                                                                                                                                                                      |
|-----|----------------|--------------|--------------|-------------|---|------|------|---------------------|--------------------|----------------------------------------------------------------------------------------------------------------------------------------------------------------------|
| 624 | 2pc1A<br>(173) | 148-162 (15) | 153-162 (10) | 153-157 (5) | C | 0.42 | 2.11 | 91.54%<br>(119/130) | 8.46%<br>(11/130)  | 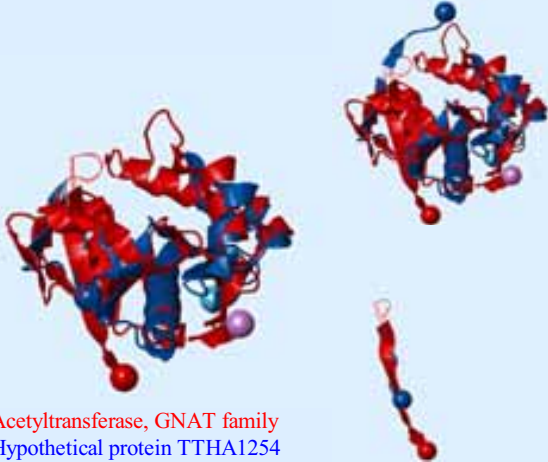 <p>Acetyltransferase, GNAT family<br/>Hypothetical protein TTHA1254</p>           |
|     | 2d4pA<br>(130) | 117-129 (13) | 124-129 (6)  | 153-157 (5) |   |      |      |                     |                    |                                                                                                                                                                      |
| 625 | 2pc1A<br>(173) | 150-162 (13) | 153-162 (10) | 152-158 (7) | C | 0.45 | 2.39 | 93.20%<br>(137/147) | 14.97%<br>(22/147) |  <p>Acetyltransferase, GNAT family<br/>Aminoglycoside 6'-N-acetyltransferase</p> |
|     | 2vbqA<br>(147) | 136-144 (9)  | 140-144 (5)  | 152-158 (7) |   |      |      |                     |                    |                                                                                                                                                                      |
| 626 | 2pd7A<br>(149) | 58-74 (17)   | 58-73 (16)   | 58-71 (14)  | N | 0.48 | 1.52 | 95.80%<br>(114/119) | 23.53%<br>(28/119) |  <p>Vivid PAS protein VVD<br/>Nitrogen fixation regulatory protein</p>          |
|     | 2gj3B<br>(119) | 35-39 (5)    | 35-38 (4)    | 58-71 (14)  |   |      |      |                     |                    |                                                                                                                                                                      |

|     |                |              |              |              |   |      |      |                     |                    |                                                                                                                                                                              |
|-----|----------------|--------------|--------------|--------------|---|------|------|---------------------|--------------------|------------------------------------------------------------------------------------------------------------------------------------------------------------------------------|
| 627 | 2pd7A<br>(149) | 54-74 (21)   | 54-72 (19)   | 54-72 (19)   | N | 0.40 | 1.57 | 95.04%<br>(115/121) | 30.58%<br>(37/121) |  <p>Vivid PAS protein VVD<br/>Phototropin-1</p>                                            |
|     | 2z6cA<br>(121) | 192-200 (9)  | 192-198 (7)  | 54-72 (19)   |   |      |      |                     |                    |                                                                                                                                                                              |
| 628 | 2pieA<br>(132) | 125-128 (4)  | 125-128 (4)  | 126-128 (3)  | C | 0.37 | 2.01 | 84.85%<br>(112/132) | 15.15%<br>(20/132) |  <p>E3 ubiquitin-protein ligase RNF8<br/>Protein kinase SPK1</p>                          |
|     | 1j4kA<br>(158) | 695-722 (28) | 695-722 (28) | 126-128 (3)  |   |      |      |                     |                    |                                                                                                                                                                              |
| 629 | 2pr1A<br>(152) | 105-152 (48) | 122-146 (25) | 133-144 (12) | C | 0.40 | 2.24 | 79.33%<br>(119/150) | 9.33%<br>(14/150)  |  <p>Uncharacterized N-acetyltransferase<br/>ylbP<br/>HPA2 histone acetyltransferase</p> |
|     | 1qsmA<br>(150) | 113-156 (44) | 138-151 (14) | 133-144 (12) |   |      |      |                     |                    |                                                                                                                                                                              |

|     |                |              |              |              |   |      |      |                     |                    |                                                                                                                                                                                     |
|-----|----------------|--------------|--------------|--------------|---|------|------|---------------------|--------------------|-------------------------------------------------------------------------------------------------------------------------------------------------------------------------------------|
| 630 | 2pr1A<br>(152) | 118-149 (32) | 124-143 (20) | 132-142 (11) | C | 0.40 | 2.41 | 81.88%<br>(122/149) | 10.07%<br>(15/149) | 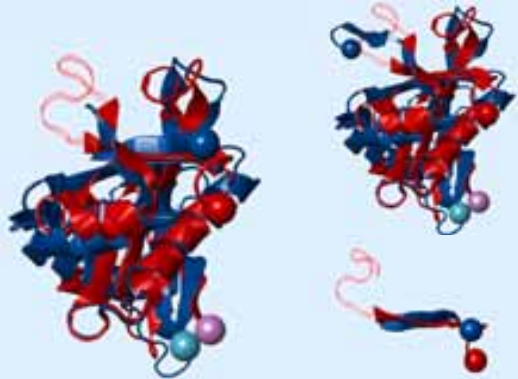 <p>Uncharacterized N-acetyltransferase<br/>ylbP<br/>HPA2 histone acetyltransferase</p>           |
|     | 1qsmB<br>(149) | 132-155 (24) | 140-149 (10) | 132-142 (11) |   |      |      |                     |                    |                                                                                                                                                                                     |
| 631 | 2pr1A<br>(152) | 105-143 (39) | 126-143 (18) | 133-142 (10) | C | 0.40 | 2.18 | 78.29%<br>(119/152) | 9.21%<br>(14/152)  |  <p>Uncharacterized N-acetyltransferase<br/>ylbP<br/>HPA2 histone acetyltransferase</p>          |
|     | 1qsmD<br>(152) | 113-150 (38) | 142-150 (9)  | 133-142 (10) |   |      |      |                     |                    |                                                                                                                                                                                     |
| 632 | 2pr1A<br>(152) | 131-143 (13) | 131-143 (13) | 132-140 (9)  | C | 0.45 | 2.28 | 86.21%<br>(125/145) | 8.97%<br>(13/145)  |  <p>Uncharacterized N-acetyltransferase<br/>ylbP<br/>Aminoglycoside 6'-N-acetyltransferase</p> |
|     | 1s3zB<br>(145) | 135-139 (5)  | 135-139 (5)  | 132-140 (9)  |   |      |      |                     |                    |                                                                                                                                                                                     |

|     |                |              |              |              |   |      |      |                     |                    |                                                                                                                                                                                  |
|-----|----------------|--------------|--------------|--------------|---|------|------|---------------------|--------------------|----------------------------------------------------------------------------------------------------------------------------------------------------------------------------------|
| 633 | 2pr1A<br>(152) | 131-143 (13) | 131-143 (13) | 132-140 (9)  | C | 0.43 | 2.28 | 82.24%<br>(125/152) | 8.55%<br>(13/152)  | 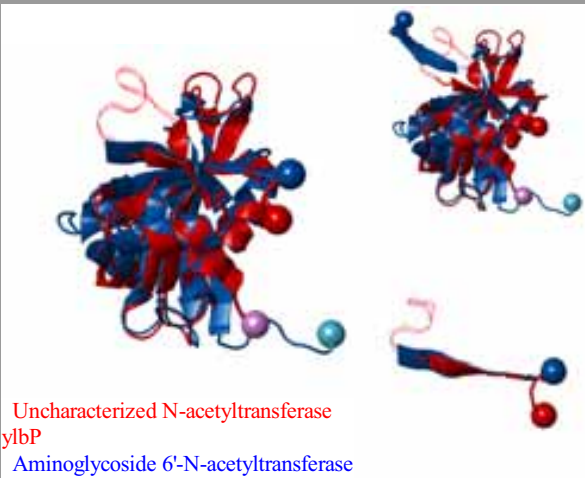 <p>Uncharacterized N-acetyltransferase<br/>ylbP<br/>Aminoglycoside 6'-N-acetyltransferase</p> |
|     | 1s5kA<br>(153) | 135-139 (5)  | 135-139 (5)  | 132-140 (9)  |   |      |      |                     |                    |                                                                                                                                                                                  |
| 634 | 2pr1A<br>(152) | 131-143 (13) | 131-143 (13) | 131-141 (11) | C | 0.33 | 2.42 | 74.34%<br>(113/152) | 5.26%<br>(8/152)   |  <p>Uncharacterized N-acetyltransferase<br/>ylbP<br/>YYCN protein</p>                        |
|     | 1ufhA<br>(155) | 148-150 (3)  | 148-150 (3)  | 131-141 (11) |   |      |      |                     |                    |                                                                                                                                                                                  |
| 635 | 2pr1A<br>(152) | 130-143 (14) | 130-143 (14) | 131-140 (10) | C | 0.44 | 1.87 | 78.67%<br>(118/150) | 11.33%<br>(17/150) |  <p>Uncharacterized N-acetyltransferase<br/>ylbP<br/>Transcriptional regulator</p>          |
|     | 1z4eA<br>(150) | 144-148 (5)  | 144-148 (5)  | 131-140 (10) |   |      |      |                     |                    |                                                                                                                                                                                  |

|     |                |              |              |              |   |      |      |                     |                    |                                                                                                                                                                                                                                                              |
|-----|----------------|--------------|--------------|--------------|---|------|------|---------------------|--------------------|--------------------------------------------------------------------------------------------------------------------------------------------------------------------------------------------------------------------------------------------------------------|
| 636 | 2pr1A<br>(152) | 125-151 (27) | 130-143 (14) | 132-142 (11) | C | 0.39 | 2.47 | 84.87%<br>(129/152) | 10.53%<br>(16/152) | <br><br>Uncharacterized N-acetyltransferase<br>ylbP<br>Diamine acetyltransferase 1       |
|     | 2f5iA<br>(167) | 142-164 (23) | 147-156 (10) | 132-142 (11) |   |      |      |                     |                    |                                                                                                                                                                                                                                                              |
| 637 | 2pr1A<br>(152) | 125-151 (27) | 125-142 (18) | 132-142 (11) | C | 0.37 | 2.63 | 85.53%<br>(130/152) | 10.53%<br>(16/152) | <br><br>Uncharacterized N-acetyltransferase<br>ylbP<br>Diamine acetyltransferase 1     |
|     | 2g3tA<br>(169) | 142-168 (27) | 142-155 (14) | 132-142 (11) |   |      |      |                     |                    |                                                                                                                                                                                                                                                              |
| 638 | 2pr1A<br>(152) | 125-151 (27) | 130-142 (13) | 131-142 (12) | C | 0.38 | 2.56 | 85.53%<br>(130/152) | 9.87%<br>(15/152)  | <br><br>Uncharacterized N-acetyltransferase<br>ylbP<br>Diamine acetyltransferase 1 |
|     | 2jevA<br>(169) | 142-164 (23) | 147-155 (9)  | 131-142 (12) |   |      |      |                     |                    |                                                                                                                                                                                                                                                              |

|     |                |              |              |              |   |      |      |                     |                   |                                                                                                                                                                                                                                                                                 |
|-----|----------------|--------------|--------------|--------------|---|------|------|---------------------|-------------------|---------------------------------------------------------------------------------------------------------------------------------------------------------------------------------------------------------------------------------------------------------------------------------|
| 639 | 2pr1A<br>(152) | 132-149 (18) | 132-143 (12) | 133-141 (9)  | C | 0.35 | 2.32 | 81.58%<br>(124/152) | 8.55%<br>(13/152) |   <p>Uncharacterized N-acetyltransferase<br/>ylbP<br/>Glucosamine 6-phosphate<br/>N-acetyltransferase</p>  |
|     | 2o28A<br>(182) | 174-183 (10) | 174-177 (4)  | 133-141 (9)  |   |      |      |                     |                   |                                                                                                                                                                                                                                                                                 |
| 640 | 2pr1A<br>(152) | 132-148 (17) | 132-143 (12) | 133-142 (10) | C | 0.34 | 2.36 | 80.26%<br>(122/152) | 8.55%<br>(13/152) |   <p>Uncharacterized N-acetyltransferase<br/>ylbP<br/>Glucosamine 6-phosphate<br/>N-acetyltransferase</p> |
|     | 2o28B<br>(180) | 174-181 (8)  | 174-176 (3)  | 133-142 (10) |   |      |      |                     |                   |                                                                                                                                                                                                                                                                                 |
| 641 | 2pr1A<br>(152) | 131-143 (13) | 131-143 (13) | 132-140 (9)  | C | 0.45 | 2.27 | 86.11%<br>(124/144) | 9.03%<br>(13/144) |   <p>Uncharacterized N-acetyltransferase<br/>ylbP<br/>Aminoglycoside 6'-N-acetyltransferase</p>       |
|     | 2vbqB<br>(144) | 135-139 (5)  | 135-139 (5)  | 132-140 (9)  |   |      |      |                     |                   |                                                                                                                                                                                                                                                                                 |

|     |                |              |              |              |   |      |      |                     |                    |                                                                                                                                                                                          |
|-----|----------------|--------------|--------------|--------------|---|------|------|---------------------|--------------------|------------------------------------------------------------------------------------------------------------------------------------------------------------------------------------------|
| 642 | 2pr1A<br>(152) | 131-143 (13) | 131-143 (13) | 131-140 (10) | C | 0.36 | 2.34 | 79.61%<br>(121/152) | 10.53%<br>(16/152) | 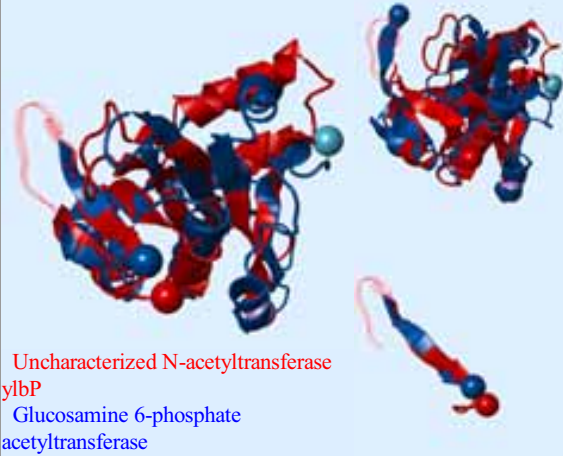 <p>Uncharacterized N-acetyltransferase<br/>ylbP<br/>Glucosamine 6-phosphate<br/>acetyltransferase</p> |
|     | 2vxkA<br>(165) | 182-185 (4)  | 182-185 (4)  | 131-140 (10) |   |      |      |                     |                    |                                                                                                                                                                                          |
| 643 | 2pr8A<br>(173) | 161-180 (20) | 161-180 (20) | 161-169 (9)  | C | 0.35 | 2.56 | 82.58%<br>(128/155) | 12.26%<br>(19/155) |  <p>Aminoglycoside 6-N-acetyltransferase<br/>type Ib1<br/>YYCN protein</p>                           |
|     | 1ufhA<br>(155) | 147-155 (9)  | 147-155 (9)  | 161-169 (9)  |   |      |      |                     |                    |                                                                                                                                                                                          |
| 644 | 2pr8A<br>(173) | 154-155 (2)  | 154-155 (2)  | 154-155 (2)  | C | 0.36 | 3.09 | 92.62%<br>(138/149) | 12.75%<br>(19/149) |  <p>Aminoglycoside 6-N-acetyltransferase<br/>type Ib1<br/>Putative acetyl transferase</p>           |
|     | 1vkcA<br>(149) | 134-135 (2)  | 134-135 (2)  | 154-155 (2)  |   |      |      |                     |                    |                                                                                                                                                                                          |

|     |                |              |              |             |   |      |      |                     |                    |                                                                                                                                                                                                                                                                           |
|-----|----------------|--------------|--------------|-------------|---|------|------|---------------------|--------------------|---------------------------------------------------------------------------------------------------------------------------------------------------------------------------------------------------------------------------------------------------------------------------|
| 645 | 2pr8A<br>(173) | 162-182 (21) | 162-182 (21) | 164-172 (9) | C | 0.41 | 2.78 | 94.56%<br>(139/147) | 14.29%<br>(21/147) |   <p>Aminoglycoside 6-N-acetyltransferase<br/>type Ib1<br/>Aminoglycoside 6'-N-acetyltransferase</p> |
|     | 2vbqA<br>(147) | 135-144 (10) | 135-144 (10) | 164-172 (9) |   |      |      |                     |                    |                                                                                                                                                                                                                                                                           |
| 646 | 2qlrA<br>(425) | 35-76 (42)   | 35-76 (42)   | 41-72 (32)  | N | 0.42 | 2.63 | 89.39%<br>(354/396) | 13.38%<br>(53/396) |   <p>Kynurenine/alpha-aminoadipate<br/>aminotransferase<br/>Aspartate aminotransferase</p>         |
|     | 1ahxA<br>(396) | 34-72 (39)   | 34-72 (39)   | 41-72 (32)  |   |      |      |                     |                    |                                                                                                                                                                                                                                                                           |
| 647 | 2qlrA<br>(425) | 35-75 (41)   | 37-75 (39)   | 49-72 (24)  | N | 0.36 | 2.71 | 89.90%<br>(356/396) | 13.89%<br>(55/396) |   <p>Kynurenine/alpha-aminoadipate<br/>aminotransferase<br/>Aspartate aminotransferase</p>      |
|     | 1aiaA<br>(396) | 34-71 (38)   | 36-71 (36)   | 49-72 (24)  |   |      |      |                     |                    |                                                                                                                                                                                                                                                                           |



|     |                |            |            |            |   |      |      |                     |                    |                                                                                                                                                                               |
|-----|----------------|------------|------------|------------|---|------|------|---------------------|--------------------|-------------------------------------------------------------------------------------------------------------------------------------------------------------------------------|
| 648 | 2qlrA<br>(425) | 3-76 (74)  | 16-76 (61) | 51-72 (22) | N | 0.33 | 2.72 | 89.65%<br>(355/396) | 12.63%<br>(50/396) | 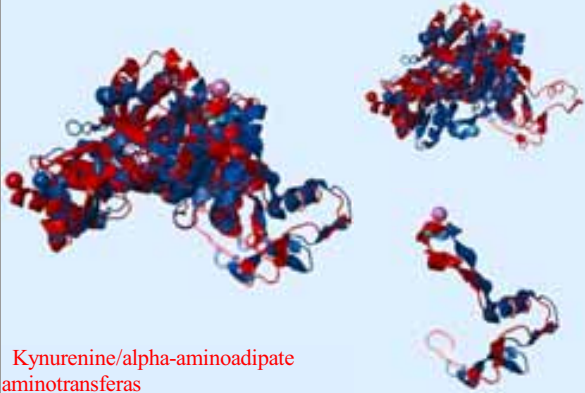 <p>Kynurenine/alpha-aminoadipate<br/>aminotransferas<br/>Aspartate aminotransferase</p>   |
|     | 1arhA<br>(396) | 6-72 (67)  | 13-72 (60) | 51-72 (22) |   |      |      |                     |                    |                                                                                                                                                                               |
| 649 | 2qlrA<br>(425) | 3-76 (74)  | 3-76 (74)  | 49-72 (24) | N | 0.34 | 2.61 | 89.14%<br>(353/396) | 12.88%<br>(51/396) |  <p>Kynurenine/alpha-aminoadipate<br/>aminotransferas<br/>Aspartate aminotransferase</p>  |
|     | 1ariA<br>(396) | 6-72 (67)  | 6-72 (67)  | 49-72 (24) |   |      |      |                     |                    |                                                                                                                                                                               |
| 650 | 2qlrA<br>(425) | 35-75 (41) | 38-75 (38) | 43-72 (30) | N | 0.42 | 2.67 | 89.39%<br>(354/396) | 13.38%<br>(53/396) |  <p>Kynurenine/alpha-aminoadipate<br/>aminotransferas<br/>Aspartate aminotransferase</p> |
|     | 1arsA<br>(396) | 34-71 (38) | 37-71 (35) | 43-72 (30) |   |      |      |                     |                    |                                                                                                                                                                               |

|     |                |            |            |            |   |      |      |                     |                    |                                                                                                                                                                                 |
|-----|----------------|------------|------------|------------|---|------|------|---------------------|--------------------|---------------------------------------------------------------------------------------------------------------------------------------------------------------------------------|
| 651 | 2qlrA<br>(425) | 33-76 (44) | 33-72 (40) | 49-72 (24) | N | 0.36 | 2.78 | 90.40%<br>(358/396) | 12.88%<br>(51/396) | <br>Kynurenine/alpha-aminoadipate<br>aminotransferas<br>Aspartate aminotransferase           |
|     | 1asfA<br>(396) | 39-79 (41) | 39-75 (37) | 49-72 (24) |   |      |      |                     |                    |                                                                                                                                                                                 |
| 652 | 2qlrA<br>(425) | 15-72 (58) | 16-72 (57) | 17-71 (55) | N | 0.53 | 2.10 | 93.98%<br>(359/382) | 20.68%<br>(79/382) | <br>Kynurenine/alpha-aminoadipate<br>aminotransferas<br>Protein (aspartate aminotransferase) |
|     | 1b5oA<br>(382) | 12-62 (51) | 13-62 (50) | 17-71 (55) |   |      |      |                     |                    |                                                                                                                                                                                 |
| 653 | 2qlrA<br>(425) | 15-72 (58) | 16-72 (57) | 20-72 (53) | N | 0.48 | 2.00 | 94.50%<br>(361/382) | 20.42%<br>(78/382) | <br>Kynurenine/alpha-aminoadipate<br>aminotransferas<br>Aspartate aminotransferase         |
|     | 1bkgA<br>(382) | 12-62 (51) | 13-62 (50) | 20-72 (53) |   |      |      |                     |                    |                                                                                                                                                                                 |

|     |                |            |            |            |   |      |      |                     |                    |                                                                                                                                                                               |
|-----|----------------|------------|------------|------------|---|------|------|---------------------|--------------------|-------------------------------------------------------------------------------------------------------------------------------------------------------------------------------|
| 654 | 2qlrA<br>(425) | 35-79 (45) | 37-75 (39) | 43-72 (30) | N | 0.41 | 2.66 | 89.14%<br>(353/396) | 12.63%<br>(50/396) | 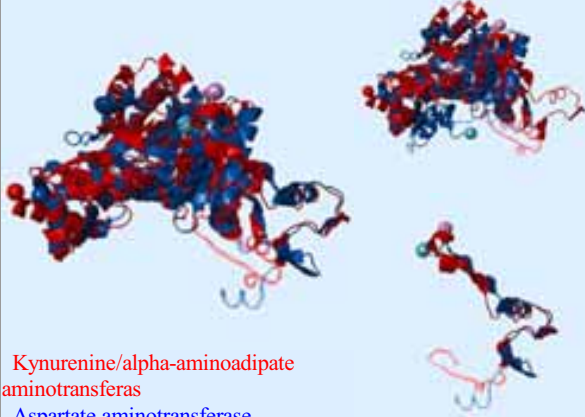 <p>Kynurenine/alpha-aminoadipate<br/>aminotransferas<br/>Aspartate aminotransferase</p>   |
|     | 1g4vA<br>(396) | 34-75 (42) | 36-71 (36) | 43-72 (30) |   |      |      |                     |                    |                                                                                                                                                                               |
| 655 | 2qlrA<br>(425) | 3-80 (78)  | 36-75 (40) | 43-73 (31) | N | 0.41 | 2.68 | 88.89%<br>(352/396) | 13.13%<br>(52/396) |  <p>Kynurenine/alpha-aminoadipate<br/>aminotransferas<br/>Aspartate aminotransferase</p>  |
|     | 1g4xA<br>(396) | 5-76 (72)  | 35-71 (37) | 43-73 (31) |   |      |      |                     |                    |                                                                                                                                                                               |
| 656 | 2qlrA<br>(425) | 1-79 (79)  | 36-75 (40) | 51-73 (23) | N | 0.35 | 2.77 | 88.38%<br>(350/396) | 13.89%<br>(55/396) |  <p>Kynurenine/alpha-aminoadipate<br/>aminotransferas<br/>Aspartate aminotransferase</p> |
|     | 1g7wA<br>(396) | 5-75 (71)  | 35-71 (37) | 51-73 (23) |   |      |      |                     |                    |                                                                                                                                                                               |

|     |                |            |            |            |   |      |      |                     |                    |                                                                                                                                                                         |
|-----|----------------|------------|------------|------------|---|------|------|---------------------|--------------------|-------------------------------------------------------------------------------------------------------------------------------------------------------------------------|
| 657 | 2qlrA<br>(425) | 3-76 (74)  | 37-75 (39) | 43-72 (30) | N | 0.41 | 2.71 | 89.39%<br>(354/396) | 12.88%<br>(51/396) | 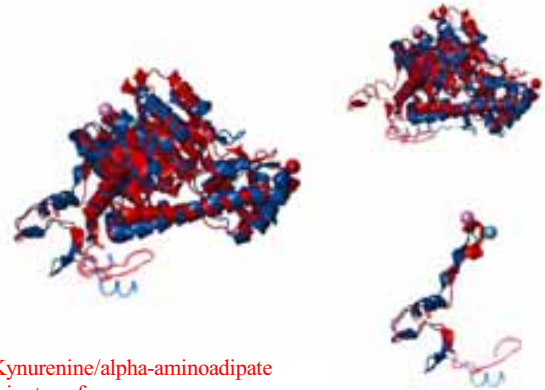<br>Kynurenine/alpha-aminoadipate<br>aminotransferas<br>Aspartate aminotransferase   |
|     | 1g7xA<br>(396) | 5-72 (68)  | 36-71 (36) | 43-72 (30) |   |      |      |                     |                    |                                                                                                                                                                         |
| 658 | 2qlrA<br>(425) | 2-75 (74)  | 14-72 (59) | 22-71 (50) | N | 0.47 | 2.06 | 95.03%<br>(363/382) | 19.90%<br>(76/382) | <br>Kynurenine/alpha-aminoadipate<br>aminotransferas<br>Aspartate aminotransferase  |
|     | 1gc3A<br>(382) | 2-65 (64)  | 11-62 (52) | 22-71 (50) |   |      |      |                     |                    |                                                                                                                                                                         |
| 659 | 2qlrA<br>(425) | 15-72 (58) | 44-71 (28) | 49-71 (23) | N | 0.41 | 2.21 | 93.56%<br>(363/388) | 20.62%<br>(80/388) | <br>Kynurenine/alpha-aminoadipate<br>aminotransferas<br>Aspartate aminotransferase |
|     | 1gdeA<br>(388) | 11-57 (47) | 38-56 (19) | 49-71 (23) |   |      |      |                     |                    |                                                                                                                                                                         |

|     |                |            |            |            |   |      |      |                     |                    |                                                                                                                                                                                  |
|-----|----------------|------------|------------|------------|---|------|------|---------------------|--------------------|----------------------------------------------------------------------------------------------------------------------------------------------------------------------------------|
| 660 | 2qlrA<br>(425) | 10-73 (64) | 43-73 (31) | 54-73 (20) | N | 0.30 | 2.67 | 94.35%<br>(334/354) | 13.84%<br>(49/354) | <br>Kynurenine/alpha-aminoadipate<br>aminotransferas<br>Histidinol phosphate aminotransferase |
|     | lijiA<br>(354) | 13-54 (42) | 40-54 (15) | 54-73 (20) |   |      |      |                     |                    |                                                                                                                                                                                  |
| 661 | 2qlrA<br>(425) | 35-76 (42) | 37-75 (39) | 47-72 (26) | N | 0.41 | 2.68 | 88.89%<br>(352/396) | 13.38%<br>(53/396) | <br>Kynurenine/alpha-aminoadipate<br>aminotransferas<br>Aspartate aminotransferase           |
|     | lix6A<br>(396) | 34-72 (39) | 36-71 (36) | 47-72 (26) |   |      |      |                     |                    |                                                                                                                                                                                  |
| 662 | 2qlrA<br>(425) | 3-76 (74)  | 3-75 (73)  | 53-73 (21) | N | 0.33 | 2.78 | 88.38%<br>(350/396) | 13.13%<br>(52/396) | <br>Kynurenine/alpha-aminoadipate<br>aminotransferas<br>Aspartate aminotransferase          |
|     | lix8A<br>(396) | 6-72 (67)  | 6-71 (66)  | 53-73 (21) |   |      |      |                     |                    |                                                                                                                                                                                  |

|     |                |            |            |            |   |      |      |                     |                    |                                                                                                                                                                         |
|-----|----------------|------------|------------|------------|---|------|------|---------------------|--------------------|-------------------------------------------------------------------------------------------------------------------------------------------------------------------------|
| 663 | 2qlrA<br>(425) | 3-72 (70)  | 14-72 (59) | 53-71 (19) | N | 0.46 | 2.07 | 94.33%<br>(366/388) | 16.49%<br>(64/388) | 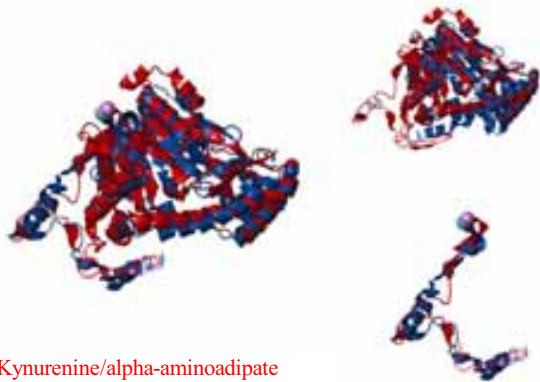<br>Kynurenine/alpha-aminoadipate<br>aminotransferas<br>Aspartate aminotransferase   |
|     | 1j32A<br>(388) | 2-61 (60)  | 10-61 (52) | 53-71 (19) |   |      |      |                     |                    |                                                                                                                                                                         |
| 664 | 2qlrA<br>(425) | 38-76 (39) | 38-72 (35) | 47-72 (26) | N | 0.47 | 2.07 | 92.00%<br>(345/375) | 18.67%<br>(70/375) | <br>Kynurenine/alpha-aminoadipate<br>aminotransferas<br>Aspartate aminotransferase  |
|     | 1o4sA<br>(375) | 36-64 (29) | 36-60 (25) | 47-72 (26) |   |      |      |                     |                    |                                                                                                                                                                         |
| 665 | 2qlrA<br>(425) | 3-76 (74)  | 3-76 (74)  | 43-72 (30) | N | 0.42 | 2.66 | 89.65%<br>(355/396) | 12.63%<br>(50/396) | <br>Kynurenine/alpha-aminoadipate<br>aminotransferas<br>Aspartate aminotransferase |
|     | 1qirA<br>(396) | 6-72 (67)  | 6-72 (67)  | 43-72 (30) |   |      |      |                     |                    |                                                                                                                                                                         |

|     |                |            |            |            |   |      |      |                     |                    |                                                                                                                                                                                    |
|-----|----------------|------------|------------|------------|---|------|------|---------------------|--------------------|------------------------------------------------------------------------------------------------------------------------------------------------------------------------------------|
| 666 | 2qlrA<br>(425) | 35-76 (42) | 35-75 (41) | 43-72 (30) | N | 0.42 | 2.64 | 88.89%<br>(352/396) | 12.88%<br>(51/396) | 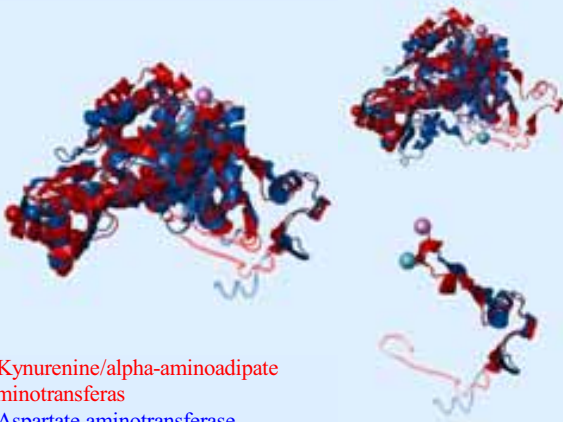<br>Kynurenine/alpha-aminoadipate<br>aminotransferas<br>Aspartate aminotransferase              |
|     | 1spaA<br>(396) | 34-72 (39) | 34-71 (38) | 43-72 (30) |   |      |      |                     |                    |                                                                                                                                                                                    |
| 667 | 2qlrA<br>(425) | 4-69 (66)  | 4-69 (66)  | 49-67 (19) | N | 0.26 | 2.72 | 93.13%<br>(312/335) | 11.64%<br>(39/335) | <br>Kynurenine/alpha-aminoadipate<br>aminotransferas<br>Histidinol-phosphate aminotransferase  |
|     | 1uu1C<br>(335) | 1-48 (48)  | 1-48 (48)  | 49-67 (19) |   |      |      |                     |                    |                                                                                                                                                                                    |
| 668 | 2qlrA<br>(425) | 1-79 (79)  | 42-69 (28) | 51-67 (17) | N | 0.31 | 2.58 | 93.15%<br>(299/321) | 12.77%<br>(41/321) | <br>Kynurenine/alpha-aminoadipate<br>aminotransferas<br>Histidinol-phosphate aminotransferase |
|     | 1uu2A<br>(321) | 14-57 (44) | 30-48 (19) | 51-67 (17) |   |      |      |                     |                    |                                                                                                                                                                                    |

|     |                |            |            |            |   |      |      |                     |                     |                                                                                                                                                                                |
|-----|----------------|------------|------------|------------|---|------|------|---------------------|---------------------|--------------------------------------------------------------------------------------------------------------------------------------------------------------------------------|
| 669 | 2qlrA<br>(425) | 14-75 (62) | 17-71 (55) | 39-71 (33) | N | 0.52 | 2.15 | 95.10%<br>(349/367) | 20.44%<br>(75/367)  | 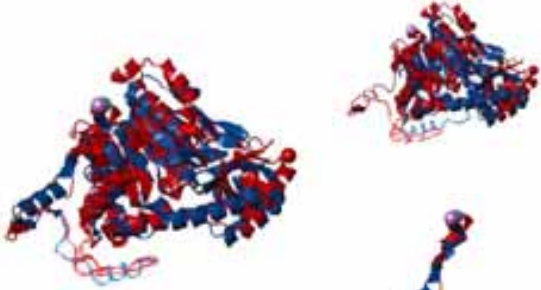<br>Kynurenine/alpha-aminoadipate<br>aminotransferas<br>Glutamine aminotransferase          |
|     | 1v2fB<br>(367) | 10-58 (49) | 13-54 (42) | 39-71 (33) |   |      |      |                     |                     |                                                                                                                                                                                |
| 670 | 2qlrA<br>(425) | 47-80 (34) | 47-71 (25) | 47-71 (25) | N | 0.60 | 1.69 | 94.04%<br>(379/403) | 29.28%<br>(118/403) | <br>Kynurenine/alpha-aminoadipate<br>aminotransferas<br>Multiple substrate aminotransferase |
|     | 1wstA<br>(403) | 57-85 (29) | 57-76 (20) | 47-71 (25) |   |      |      |                     |                     |                                                                                                                                                                                |
| 671 | 2qlrA<br>(425) | 47-72 (26) | 47-71 (25) | 47-71 (25) | N | 0.59 | 1.74 | 94.54%<br>(381/403) | 29.28%<br>(118/403) | <br>Kynurenine/alpha-aminoadipate<br>aminotransferas<br>Aminotransferase II homologue     |
|     | 1x0mA<br>(403) | 72-92 (21) | 72-91 (20) | 47-71 (25) |   |      |      |                     |                     |                                                                                                                                                                                |



|     |                |           |           |            |   |      |      |                     |                    |                                                                                                                                                                               |
|-----|----------------|-----------|-----------|------------|---|------|------|---------------------|--------------------|-------------------------------------------------------------------------------------------------------------------------------------------------------------------------------|
| 672 | 2qlrA<br>(425) | 2-76 (75) | 2-75 (74) | 36-68 (33) | N | 0.42 | 2.59 | 87.14%<br>(359/412) | 10.44%<br>(43/412) | 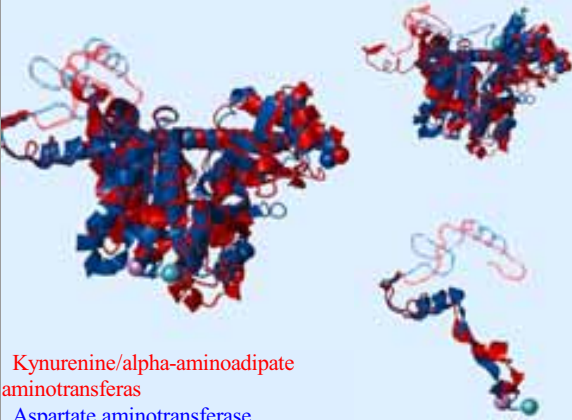 <p>Kynurenine/alpha-aminoadipate<br/>aminotransferas<br/>Aspartate aminotransferase</p>   |
|     | 1yaaA<br>(412) | 4-72 (69) | 4-71 (68) | 36-68 (33) |   |      |      |                     |                    |                                                                                                                                                                               |
| 673 | 2qlrA<br>(425) | 3-80 (78) | 6-76 (71) | 18-72 (55) | N | 0.41 | 2.70 | 89.65%<br>(355/396) | 12.63%<br>(50/396) |  <p>Kynurenine/alpha-aminoadipate<br/>aminotransferas<br/>Aspartate aminotransferase</p>  |
|     | 1yooA<br>(396) | 6-76 (71) | 9-72 (64) | 18-72 (55) |   |      |      |                     |                    |                                                                                                                                                                               |
| 674 | 2qlrA<br>(425) | 3-76 (74) | 3-75 (73) | 49-72 (24) | N | 0.35 | 2.67 | 89.65%<br>(355/396) | 12.63%<br>(50/396) |  <p>Kynurenine/alpha-aminoadipate<br/>aminotransferas<br/>Aspartate aminotransferase</p> |
|     | 2d5yA<br>(396) | 6-72 (67) | 6-71 (66) | 49-72 (24) |   |      |      |                     |                    |                                                                                                                                                                               |

|     |                |            |            |            |   |      |      |                     |                    |                                                                                                                                                                               |
|-----|----------------|------------|------------|------------|---|------|------|---------------------|--------------------|-------------------------------------------------------------------------------------------------------------------------------------------------------------------------------|
| 675 | 2qlrA<br>(425) | 35-76 (42) | 48-75 (28) | 48-72 (25) | N | 0.39 | 2.61 | 88.38%<br>(350/396) | 14.14%<br>(56/396) |  <p>Kynurenine/alpha-aminoadipate<br/>aminotransferas<br/>Aspartate aminotransferase</p>   |
|     | 2d61A<br>(396) | 34-72 (39) | 52-71 (20) | 48-72 (25) |   |      |      |                     |                    |                                                                                                                                                                               |
| 676 | 2qlrA<br>(425) | 3-76 (74)  | 35-75 (41) | 41-72 (32) | N | 0.41 | 2.70 | 89.65%<br>(355/396) | 13.89%<br>(55/396) |  <p>Kynurenine/alpha-aminoadipate<br/>aminotransferas<br/>Aspartate aminotransferase</p>   |
|     | 2d64A<br>(396) | 6-72 (67)  | 34-71 (38) | 41-72 (32) |   |      |      |                     |                    |                                                                                                                                                                               |
| 677 | 2qlrA<br>(425) | 3-76 (74)  | 3-75 (73)  | 43-72 (30) | N | 0.42 | 2.68 | 89.65%<br>(355/396) | 12.63%<br>(50/396) |  <p>Kynurenine/alpha-aminoadipate<br/>aminotransferas<br/>Aspartate aminotransferase</p> |
|     | 2d66A<br>(396) | 6-72 (67)  | 6-71 (66)  | 43-72 (30) |   |      |      |                     |                    |                                                                                                                                                                               |

|     |                |            |            |            |   |      |      |                     |                     |                                                                                                          |
|-----|----------------|------------|------------|------------|---|------|------|---------------------|---------------------|----------------------------------------------------------------------------------------------------------|
| 678 | 2qlrA<br>(425) | 1-83 (83)  | 1-68 (68)  | 35-68 (34) | N | 0.50 | 2.13 | 93.82%<br>(349/372) | 17.47%<br>(65/372)  | <br>Kynurenine/alpha-aminoadipate<br>aminotransferas<br>Probable N-succinyldiaminopimelate<br>aminotrans |
|     | 2douA<br>(372) | 4-68 (65)  | 4-53 (50)  | 35-68 (34) |   |      |      |                     |                     |                                                                                                          |
| 679 | 2qlrA<br>(425) | 17-83 (67) | 17-68 (52) | 44-68 (25) | N | 0.51 | 2.18 | 94.84%<br>(349/368) | 17.66%<br>(65/368)  | <br>Kynurenine/alpha-aminoadipate<br>aminotransferas<br>Probable N-succinyldiaminopimelate<br>aminotrans |
|     | 2douB<br>(368) | 9-68 (60)  | 9-53 (45)  | 44-68 (25) |   |      |      |                     |                     |                                                                                                          |
| 680 | 2qlrA<br>(425) | 47-69 (23) | 47-64 (18) | 47-64 (18) | N | 0.56 | 1.82 | 96.94%<br>(380/392) | 27.30%<br>(107/392) | <br>Kynurenine/alpha-aminoadipate<br>aminotransferas<br>Alpha-aminodipate aminotransferase               |
|     | 2egyA<br>(392) | 48-65 (18) | 48-60 (13) | 47-64 (18) |   |      |      |                     |                     |                                                                                                          |

|     |                |            |            |            |   |      |      |                     |                     |                                                                                                                                                                                       |
|-----|----------------|------------|------------|------------|---|------|------|---------------------|---------------------|---------------------------------------------------------------------------------------------------------------------------------------------------------------------------------------|
| 681 | 2qlrA<br>(425) | 47-70 (24) | 47-70 (24) | 48-67 (20) | N | 0.52 | 1.78 | 96.19%<br>(379/394) | 26.65%<br>(105/394) |  <p>Kynurenine/alpha-aminoadipate<br/>aminotransferas<br/>Alpha-aminodipate aminotransferase</p>   |
|     | 2egyB<br>(394) | 48-66 (19) | 48-66 (19) | 48-67 (20) |   |      |      |                     |                     |                                                                                                                                                                                       |
| 682 | 2qlrA<br>(425) | 47-67 (21) | 47-67 (21) | 48-67 (20) | N | 0.53 | 1.78 | 96.72%<br>(383/396) | 27.27%<br>(108/396) |  <p>Kynurenine/alpha-aminoadipate<br/>aminotransferas<br/>Alpha-aminodipate aminotransferase</p>   |
|     | 2egyC<br>(396) | 48-63 (16) | 48-63 (16) | 48-67 (20) |   |      |      |                     |                     |                                                                                                                                                                                       |
| 683 | 2qlrA<br>(425) | 44-70 (27) | 44-68 (25) | 45-67 (23) | N | 0.52 | 1.67 | 96.16%<br>(376/391) | 27.37%<br>(107/391) |  <p>Kynurenine/alpha-aminoadipate<br/>aminotransferas<br/>Alpha-aminodipate aminotransferase</p> |
|     | 2egyD<br>(391) | 45-66 (22) | 45-64 (20) | 45-67 (23) |   |      |      |                     |                     |                                                                                                                                                                                       |

|     |                |            |            |            |   |      |      |                     |                     |                                                                                                                                                                                 |
|-----|----------------|------------|------------|------------|---|------|------|---------------------|---------------------|---------------------------------------------------------------------------------------------------------------------------------------------------------------------------------|
| 684 | 2qlrA<br>(425) | 13-68 (56) | 13-68 (56) | 49-67 (19) | N | 0.26 | 2.69 | 93.13%<br>(312/335) | 11.64%<br>(39/335)  | 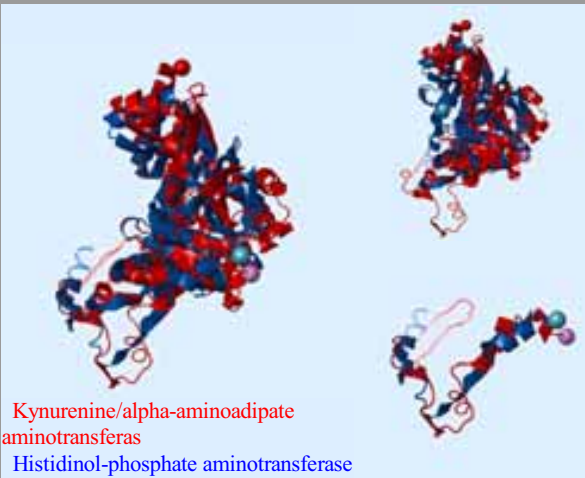<br>Kynurenine/alpha-aminoadipate<br>aminotransferas<br>Histidinol-phosphate aminotransferase |
|     | 2f8jA<br>(335) | 9-47 (39)  | 9-47 (39)  | 49-67 (19) |   |      |      |                     |                     |                                                                                                                                                                                 |
| 685 | 2qlrA<br>(425) | 47-70 (24) | 47-67 (21) | 47-67 (21) | N | 0.54 | 1.90 | 96.70%<br>(381/394) | 25.63%<br>(101/394) | <br>Kynurenine/alpha-aminoadipate<br>aminotransferas<br>Alpha-aminoadipate aminotransferase |
|     | 2z1yB<br>(394) | 48-66 (19) | 48-63 (16) | 47-67 (21) |   |      |      |                     |                     |                                                                                                                                                                                 |
| 686 | 2qlrA<br>(425) | 44-72 (29) | 47-69 (23) | 46-69 (24) | N | 0.56 | 2.04 | 95.06%<br>(385/405) | 28.15%<br>(114/405) | <br>Kynurenine/alpha-aminoadipate<br>aminotransferas<br>Alanine glyoxylate transaminase    |
|     | 2zc0A<br>(405) | 47-69 (23) | 50-66 (17) | 46-69 (24) |   |      |      |                     |                     |                                                                                                                                                                                 |

|     |                |           |            |            |   |      |      |                     |                    |                                                                                                                                                                         |
|-----|----------------|-----------|------------|------------|---|------|------|---------------------|--------------------|-------------------------------------------------------------------------------------------------------------------------------------------------------------------------|
| 687 | 2qlrA<br>(425) | 4-76 (73) | 4-75 (72)  | 49-72 (24) | N | 0.35 | 2.72 | 89.14%<br>(353/396) | 12.37%<br>(49/396) | 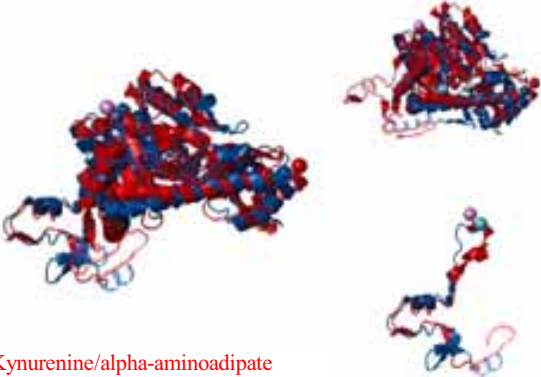<br>Kynurenine/alpha-aminoadipate<br>aminotransferas<br>Aspartate aminotransferase   |
|     | 3aatA<br>(396) | 7-72 (66) | 7-71 (65)  | 49-72 (24) |   |      |      |                     |                    |                                                                                                                                                                         |
| 688 | 2qlrA<br>(425) | 6-74 (69) | 36-74 (39) | 36-72 (37) | N | 0.40 | 2.78 | 89.17%<br>(354/397) | 12.34%<br>(49/397) | <br>Kynurenine/alpha-aminoadipate<br>aminotransferas<br>Tyrosine aminotransferase    |
|     | 3tatA<br>(397) | 6-70 (65) | 35-70 (36) | 36-72 (37) |   |      |      |                     |                    |                                                                                                                                                                         |
| 689 | 2qlrA<br>(425) | 2-75 (74) | 41-75 (35) | 51-72 (22) | N | 0.33 | 2.79 | 86.53%<br>(347/401) | 14.46%<br>(58/401) | <br>Kynurenine/alpha-aminoadipate<br>aminotransferas<br>Aspartate aminotransferase |
|     | 7aatA<br>(401) | 4-71 (68) | 38-71 (34) | 51-72 (22) |   |      |      |                     |                    |                                                                                                                                                                         |

|     |                |              |              |              |   |      |      |                     |                    |                                                                                                                                                                                                                                                                            |
|-----|----------------|--------------|--------------|--------------|---|------|------|---------------------|--------------------|----------------------------------------------------------------------------------------------------------------------------------------------------------------------------------------------------------------------------------------------------------------------------|
| 690 | 2r7hA<br>(157) | 158-172 (15) | 158-172 (15) | 158-168 (11) | C | 0.55 | 2.17 | 95.17%<br>(138/145) | 18.62%<br>(27/145) |   <p>Putative D-alanine N-acetyltransferase<br/>of GNA<br/>Aminoglycoside 6'-N-acetyltransferase</p> |
|     | 1s3zB<br>(145) | 138-142 (5)  | 138-142 (5)  | 158-168 (11) |   |      |      |                     |                    |                                                                                                                                                                                                                                                                            |
| 691 | 2r7hA<br>(157) | 157-169 (13) | 158-169 (12) | 159-160 (2)  | C | 0.52 | 2.20 | 90.20%<br>(138/153) | 15.69%<br>(24/153) |   <p>Putative D-alanine N-acetyltransferase<br/>of GNA<br/>Aminoglycoside 6'-N-acetyltransferase</p> |
|     | 1s5kA<br>(153) | 137-144 (8)  | 138-144 (7)  | 159-160 (2)  |   |      |      |                     |                    |                                                                                                                                                                                                                                                                            |
| 692 | 2r7hA<br>(157) | 154-173 (20) | 157-173 (17) | 157-168 (12) | C | 0.39 | 2.52 | 81.94%<br>(127/155) | 12.26%<br>(19/155) |   <p>Putative D-alanine N-acetyltransferase<br/>of GNA<br/>YYCN protein</p>                      |
|     | 1ufhA<br>(155) | 147-155 (9)  | 150-155 (6)  | 157-168 (12) |   |      |      |                     |                    |                                                                                                                                                                                                                                                                            |

|     |                |              |              |              |   |      |      |                     |                    |                                                                                                                                                                                          |
|-----|----------------|--------------|--------------|--------------|---|------|------|---------------------|--------------------|------------------------------------------------------------------------------------------------------------------------------------------------------------------------------------------|
| 693 | 2r7hA<br>(157) | 154-173 (20) | 154-173 (20) | 154-166 (13) | C | 0.43 | 2.45 | 85.06%<br>(131/154) | 12.99%<br>(20/154) |  <p>Putative D-alanine N-acetyltransferase<br/>of GNA<br/>YYCN protein</p>                             |
|     | 1ufhB<br>(154) | 147-155 (9)  | 147-155 (9)  | 154-166 (13) |   |      |      |                     |                    |                                                                                                                                                                                          |
| 694 | 2r7hA<br>(157) | 154-167 (14) | 154-167 (14) | 154-167 (14) | C | 0.50 | 2.19 | 90.45%<br>(142/157) | 15.92%<br>(25/157) |  <p>Putative D-alanine N-acetyltransferase<br/>of GNA<br/>Probable N-acetyltransferase</p>           |
|     | 2fe7B<br>(166) | 139-142 (4)  | 139-142 (4)  | 154-167 (14) |   |      |      |                     |                    |                                                                                                                                                                                          |
| 695 | 2r7hA<br>(157) | 154-169 (16) | 158-169 (13) | 159-160 (2)  | C | 0.52 | 2.27 | 93.88%<br>(138/147) | 16.33%<br>(24/147) |  <p>Putative D-alanine N-acetyltransferase<br/>of GNA<br/>Aminoglycoside 6'-N-acetyltransferase</p> |
|     | 2vbqA<br>(147) | 134-144 (11) | 138-144 (7)  | 159-160 (2)  |   |      |      |                     |                    |                                                                                                                                                                                          |



|     |                |              |              |              |   |      |      |                     |                    |                                                                                                                                                                                        |
|-----|----------------|--------------|--------------|--------------|---|------|------|---------------------|--------------------|----------------------------------------------------------------------------------------------------------------------------------------------------------------------------------------|
| 696 | 2r7hA<br>(157) | 154-173 (20) | 158-168 (11) | 158-167 (10) | C | 0.54 | 2.20 | 95.14%<br>(137/144) | 16.67%<br>(24/144) | 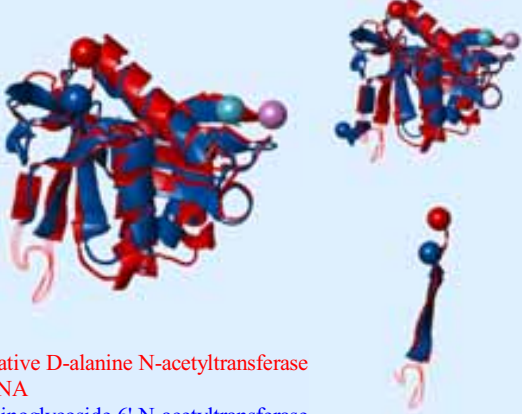 <p>Putative D-alanine N-acetyltransferase<br/>of GNA<br/>Aminoglycoside 6'-N-acetyltransferase</p> |
|     | 2vbqB<br>(144) | 134-144 (11) | 138-139 (2)  | 158-167 (10) |   |      |      |                     |                    |                                                                                                                                                                                        |
| 697 | 2rbbA<br>(129) | 72-105 (34)  | 72-104 (33)  | 84-104 (21)  | C | 0.44 | 1.86 | 82.95%<br>(107/129) | 12.40%<br>(16/129) |  <p>Glyoxalase/bleomycin resistance<br/>protein/dioxy<br/>Methylmalonyl-CoA epimerase</p>           |
|     | 1jc5D<br>(145) | 50-91 (42)   | 50-90 (41)   | 84-104 (21)  |   |      |      |                     |                    |                                                                                                                                                                                        |
| 698 | 2vi7A<br>(163) | 140-170 (31) | 142-170 (29) | 147-158 (12) | C | 0.45 | 2.40 | 88.82%<br>(135/152) | 17.11%<br>(26/152) |  <p>Acetyltransferase PA1377<br/>HPA2 histone acetyltransferase</p>                               |
|     | 1qsmD<br>(152) | 141-156 (16) | 143-156 (14) | 147-158 (12) |   |      |      |                     |                    |                                                                                                                                                                                        |

|     |                |              |              |              |   |      |      |                     |                    |                                                                                                                                                              |
|-----|----------------|--------------|--------------|--------------|---|------|------|---------------------|--------------------|--------------------------------------------------------------------------------------------------------------------------------------------------------------|
| 699 | 2vi7A<br>(163) | 146-166 (21) | 148-166 (19) | 148-159 (12) | C | 0.46 | 2.27 | 89.54%<br>(137/153) | 15.03%<br>(23/153) |  <p>Acetyltransferase PA1377<br/>Aminoglycoside 6'-N-acetyltransferase</p> |
|     | 1s5kA<br>(153) | 135-144 (10) | 137-144 (8)  | 148-159 (12) |   |      |      |                     |                    |                                                                                                                                                              |
| 700 | 2vi7A<br>(163) | 146-170 (25) | 146-170 (25) | 146-158 (13) | C | 0.45 | 2.29 | 84.66%<br>(138/163) | 20.86%<br>(34/163) |  <p>Acetyltransferase PA1377<br/>Probable N-acetyltransferase</p>         |
|     | 2fe7B<br>(166) | 140-158 (19) | 140-158 (19) | 146-158 (13) |   |      |      |                     |                    |                                                                                                                                                              |
| 701 | 2vi7A<br>(163) | 145-170 (26) | 145-158 (14) | 147-158 (12) | C | 0.44 | 2.51 | 87.73%<br>(143/163) | 11.66%<br>(19/163) |  <p>Acetyltransferase PA1377<br/>Diamine acetyltransferase 1</p>        |
|     | 2g3tA<br>(169) | 147-171 (25) | 147-153 (7)  | 147-158 (12) |   |      |      |                     |                    |                                                                                                                                                              |

|     |                |              |              |              |   |      |      |                     |                    |                                                                                                                                                                                                                                                           |
|-----|----------------|--------------|--------------|--------------|---|------|------|---------------------|--------------------|-----------------------------------------------------------------------------------------------------------------------------------------------------------------------------------------------------------------------------------------------------------|
| 702 | 2vi7A<br>(163) | 147-166 (20) | 147-166 (20) | 147-160 (14) | C | 0.48 | 1.85 | 82.21%<br>(134/163) | 19.02%<br>(31/163) |   <p>Acetyltransferase PA1377<br/>Glucosamine 6-phosphate<br/>acetyltransferase</p> |
|     | 2vxkA<br>(165) | 183-189 (7)  | 183-189 (7)  | 147-160 (14) |   |      |      |                     |                    |                                                                                                                                                                                                                                                           |
| 703 | 5croA<br>(61)  | 54-60 (7)    | 54-60 (7)    | 55-56 (2)    | C | 0.86 | 0.93 | 100.00%<br>(61/61)  | 91.80%<br>(56/61)  |   <p>CRO repressor protein<br/>Lambda CRO repressor</p>                             |
|     | 1d1mB<br>(65)  | 54-64 (11)   | 54-64 (11)   | 55-56 (2)    |   |      |      |                     |                    |                                                                                                                                                                                                                                                           |
| 704 | 5croA<br>(61)  | 42-60 (19)   | 52-60 (9)    | 54-54 (1)    | C | 0.58 | 2.03 | 95.08%<br>(58/61)   | 19.67%<br>(12/61)  |   <p>CRO repressor protein<br/>SN4m</p>                                         |
|     | 2cw1A<br>(65)  | 42-64 (23)   | 52-64 (13)   | 54-54 (1)    |   |      |      |                     |                    |                                                                                                                                                                                                                                                           |

|     |                |              |             |             |   |      |      |                     |                    |                                                                                                                                                                             |
|-----|----------------|--------------|-------------|-------------|---|------|------|---------------------|--------------------|-----------------------------------------------------------------------------------------------------------------------------------------------------------------------------|
| 705 | 5croA<br>(61)  | 44-60 (17)   | 45-60 (16)  | 55-55 (1)   | C | 0.69 | 1.49 | 100.00%<br>(61/61)  | 93.44%<br>(57/61)  |        |
|     | 2orcA<br>(71)  | 44-61 (18)   | 45-61 (17)  | 55-55 (1)   |   |      |      |                     |                    |                                                                                                                                                                             |
| 706 | 1gheA<br>(170) | 132-151 (20) | 145-151 (7) | 149-150 (2) | C | 0.50 | 2.04 | 90.13%<br>(137/152) | 13.16%<br>(20/152) |      |
|     | 1qsmD<br>(152) | 129-148 (20) | 143-148 (6) | 149-150 (2) |   |      |      |                     |                    |                                                                                                                                                                             |
| 707 | 1k53A<br>(72)  | 40-58 (19)   | 40-58 (19)  | 52-57 (6)   | C | 0.40 | 2.36 | 83.33%<br>(60/72)   | 8.33%<br>(6/72)    |   |
|     | 2hj1A<br>(77)  | 50-80 (31)   | 50-80 (31)  | 52-57 (6)   |   |      |      |                     |                    |                                                                                                                                                                             |

|     |                |            |            |            |   |      |      |                      |                      |                                                                                                                                                                  |
|-----|----------------|------------|------------|------------|---|------|------|----------------------|----------------------|------------------------------------------------------------------------------------------------------------------------------------------------------------------|
| 708 | 2c5jA<br>(82)  | 28-41 (14) | 32-41 (10) | 32-41 (10) | N | 0.32 | 1.64 | 93.90%<br>(77/82)    | 3.66%<br>(3/82)      |  <p>T-snare affecting a LATE golgi compartment PR<br/>Trp operon repressor</p> |
|     | 1mi7R<br>(103) | 27-44 (18) | 31-44 (14) | 32-41 (10) |   |      |      |                      |                      |                                                                                                                                                                  |
| 709 | 1pucA<br>(101) | 86-90 (5)  | 86-88 (3)  | 86-88 (3)  | C | 0.72 | 0.73 | 95.05%<br>(96/101)   | 71.29%<br>(72/101)   |  <p>P13SUC1<br/>Cyclin-dependent kinases regulatory subunit</p>              |
|     | 1qb3A<br>(113) | 89-93 (5)  | 89-91 (3)  | 86-88 (3)  |   |      |      |                      |                      |                                                                                                                                                                  |
| 710 | 3bcoA<br>(124) | 16-22 (7)  | 16-22 (7)  | 16-22 (7)  | N | 0.64 | 0.33 | 100.00%<br>(119/119) | 100.00%<br>(119/119) |  <p>Seminal ribonuclease<br/>Seminit</p>                                    |
|     | 3bcmA<br>(119) | 16-22 (7)  | 16-22 (7)  | 16-22 (7)  |   |      |      |                      |                      |                                                                                                                                                                  |

|     |                |             |             |             |   |      |      |                      |                     |                                                                                                                                             |
|-----|----------------|-------------|-------------|-------------|---|------|------|----------------------|---------------------|---------------------------------------------------------------------------------------------------------------------------------------------|
| 711 | 3bcoA<br>(124) | 15-22 (8)   | 15-22 (8)   | 15-22 (8)   | N | 0.43 | 0.93 | 91.13%<br>(113/124)  | 74.19%<br>(92/124)  | 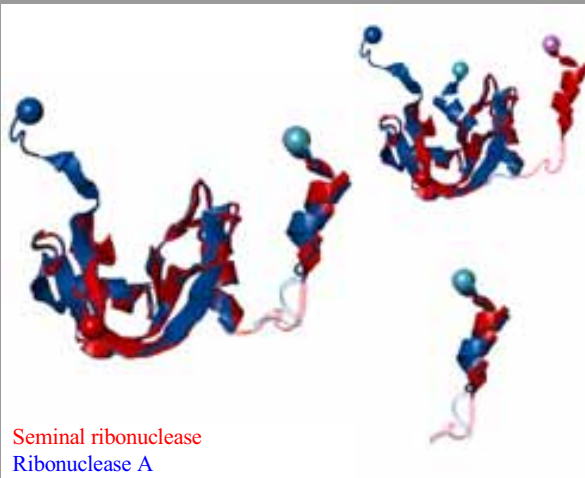 <p>Seminal ribonuclease<br/>Ribonuclease A</p>           |
|     | ljs0A<br>(124) | 15-22 (8)   | 15-22 (8)   | 15-22 (8)   |   |      |      |                      |                     |                                                                                                                                             |
| 712 | 3bcoA<br>(124) | 111-115 (5) | 112-113 (2) | 112-113 (2) | C | 0.55 | 0.83 | 83.87%<br>(104/124)  | 69.35%<br>(86/124)  |  <p>Seminal ribonuclease<br/>Ribonuclease A</p>         |
|     | ljs0A<br>(124) | 111-115 (5) | 112-113 (2) | 112-113 (2) |   |      |      |                      |                     |                                                                                                                                             |
| 713 | 3bcoA<br>(124) | 16-22 (7)   | 16-22 (7)   | 16-22 (7)   | N | 0.62 | 0.55 | 100.00%<br>(122/122) | 96.72%<br>(118/122) |  <p>Seminal ribonuclease<br/>Ribonuclease, seminal</p> |
|     | lr3mB<br>(122) | 16-22 (7)   | 16-22 (7)   | 16-22 (7)   |   |      |      |                      |                     |                                                                                                                                             |

|     |                |              |             |           |   |      |      |                      |                     |                                                                                                                                                                                                                                       |
|-----|----------------|--------------|-------------|-----------|---|------|------|----------------------|---------------------|---------------------------------------------------------------------------------------------------------------------------------------------------------------------------------------------------------------------------------------|
| 714 | 3bcoA<br>(124) | 15-22 (8)    | 15-22 (8)   | 15-22 (8) | N | 0.90 | 1.01 | 100.00%<br>(124/124) | 82.26%<br>(102/124) |   <p>Seminal ribonuclease<br/>Ribonuclease A</p>                |
|     | 1a2wA<br>(124) | 15-22 (8)    | 15-22 (8)   | 15-22 (8) |   |      |      |                      |                     |                                                                                                                                                                                                                                       |
| 715 | 3bcoA<br>(124) | 15-24 (10)   | 15-23 (9)   | 15-23 (9) | N | 0.86 | 1.09 | 99.19%<br>(123/124)  | 74.19%<br>(92/124)  |   <p>Seminal ribonuclease<br/>Ribonuclease I</p>               |
|     | 1h8xA<br>(125) | 115-124 (10) | 115-123 (9) | 15-23 (9) |   |      |      |                      |                     |                                                                                                                                                                                                                                       |
| 716 | 1a2wA<br>(124) | 15-23 (9)    | 15-22 (8)   | 15-22 (8) | N | 0.91 | 0.86 | 99.19%<br>(123/124)  | 80.65%<br>(100/124) |   <p>Ribonuclease A<br/>Protein (ribonuclease, seminal)</p> |
|     | 11baA<br>(124) | 15-23 (9)    | 15-22 (8)   | 15-22 (8) |   |      |      |                      |                     |                                                                                                                                                                                                                                       |

|     |                |              |              |              |   |      |      |                     |                    |                                                                                                                                                                   |
|-----|----------------|--------------|--------------|--------------|---|------|------|---------------------|--------------------|-------------------------------------------------------------------------------------------------------------------------------------------------------------------|
| 717 | 3b8iA<br>(283) | 254-271 (18) | 254-271 (18) | 254-264 (11) | C | 0.62 | 1.91 | 94.70%<br>(268/283) | 26.15%<br>(74/283) | 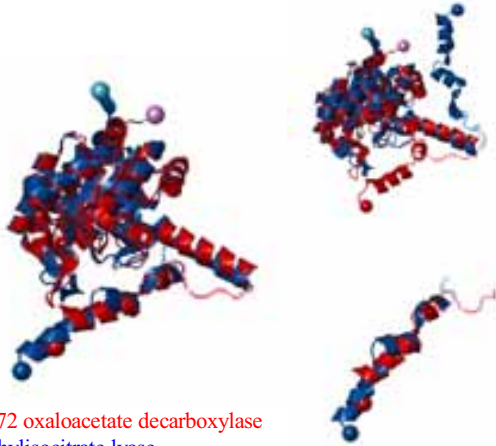 <p>PA4872 oxaloacetate decarboxylase<br/>2-methylisocitrate lyase</p>          |
|     | 1oqfA<br>(290) | 255-268 (14) | 255-268 (14) | 254-264 (11) |   |      |      |                     |                    |                                                                                                                                                                   |
| 718 | 3b8iA<br>(283) | 254-271 (18) | 254-263 (10) | 254-264 (11) | C | 0.65 | 1.63 | 94.10%<br>(255/271) | 25.83%<br>(70/271) |  <p>PA4872 oxaloacetate decarboxylase<br/>Probable methylisocitrate lyase</p> |
|     | 1o5qA<br>(271) | 256-269 (14) | 256-263 (8)  | 254-264 (11) |   |      |      |                     |                    |                                                                                                                                                                   |
| 719 | 3b8iA<br>(283) | 250-265 (16) | 254-264 (11) | 254-264 (11) | C | 0.59 | 1.95 | 91.87%<br>(260/283) | 23.67%<br>(67/283) |  <p>PA4872 oxaloacetate decarboxylase<br/>Petal death protein</p>            |
|     | 1zlpA<br>(284) | 273-293 (21) | 277-292 (16) | 254-264 (11) |   |      |      |                     |                    |                                                                                                                                                                   |



|     |                |              |              |              |   |      |      |                     |                    |                                                                                                                                                                                                                                         |
|-----|----------------|--------------|--------------|--------------|---|------|------|---------------------|--------------------|-----------------------------------------------------------------------------------------------------------------------------------------------------------------------------------------------------------------------------------------|
| 720 | 3b8iA<br>(283) | 246-265 (20) | 246-265 (20) | 246-265 (20) | C | 0.39 | 2.12 | 92.58%<br>(262/283) | 19.43%<br>(55/283) | <br><br>PA4872 oxaloacetate decarboxylase<br>Isocitrate lyase     |
|     | 1f61A<br>(418) | 359-392 (34) | 359-392 (34) | 246-265 (20) |   |      |      |                     |                    |                                                                                                                                                                                                                                         |
| 721 | 3b8iA<br>(283) | 245-266 (22) | 245-265 (21) | 245-263 (19) | C | 0.37 | 2.05 | 90.81%<br>(257/283) | 19.08%<br>(54/283) | <br><br>PA4872 oxaloacetate decarboxylase<br>Isocitrate lyase    |
|     | 1f8mA<br>(427) | 358-393 (36) | 358-392 (35) | 245-263 (19) |   |      |      |                     |                    |                                                                                                                                                                                                                                         |
| 722 | 3b8iA<br>(283) | 242-265 (24) | 242-265 (24) | 242-265 (24) | C | 0.38 | 2.03 | 90.81%<br>(257/283) | 19.43%<br>(55/283) | <br><br>PA4872 oxaloacetate decarboxylase<br>Isocitrate lyase |
|     | 1f8iA<br>(427) | 355-392 (38) | 355-392 (38) | 242-265 (24) |   |      |      |                     |                    |                                                                                                                                                                                                                                         |

|     |               |            |            |           |   |      |      |                   |                   |                                                                                                                                                  |
|-----|---------------|------------|------------|-----------|---|------|------|-------------------|-------------------|--------------------------------------------------------------------------------------------------------------------------------------------------|
| 723 | 1k51A<br>(72) | 39-49 (21) | 39-57 (19) | 54-54 (1) | C | 0.41 | 2.30 | 83.33%<br>(60/72) | 4.17%<br>(3/72)   |  <p>Protein L<br/>Hypothetical protein</p>                    |
|     | 2hj1A<br>(77) | 49-80 (32) | 49-78 (30) | 54-54 (1) |   |      |      |                   |                   |                                                                                                                                                  |
| 724 | 1k52A<br>(72) | 39-63 (25) | 40-57 (18) | 52-54 (3) | C | 0.41 | 2.21 | 81.94%<br>(59/72) | 6.94%<br>(5/72)   |  <p>Protein L<br/>Hypothetical protein</p>                   |
|     | 2hj1A<br>(77) | 49-84 (36) | 50-78 (29) | 52-54 (3) |   |      |      |                   |                   |                                                                                                                                                  |
| 725 | 1mo1A<br>(87) | 10-15 (6)  | 10-15 (6)  | 10-15 (6) | N | 0.28 | 1.57 | 59.77%<br>(52/87) | 24.14%<br>(21/87) |  <p>Hpr-like protein crh<br/>Phosphocarrier protein HPr</p> |
|     | 1y50A<br>(87) | 10-15 (6)  | 10-15 (6)  | 10-15 (6) |   |      |      |                   |                   |                                                                                                                                                  |

|     |                |             |             |             |   |      |      |                      |                     |                                                                                                                                               |
|-----|----------------|-------------|-------------|-------------|---|------|------|----------------------|---------------------|-----------------------------------------------------------------------------------------------------------------------------------------------|
| 726 | 1mo1A<br>(87)  | 51-56 (6)   | 52-56 (5)   | 52-56 (5)   | C | 0.50 | 1.63 | 80.46%<br>(70/87)    | 31.03%<br>(27/87)   |  <p>Hpr-like protein crh<br/>Phosphocarrier protein HPr</p> |
|     | 1y50A<br>(87)  | 51-56 (6)   | 52-56 (5)   | 52-56 (5)   |   |      |      |                      |                     |                                                                                                                                               |
| 727 | 3bcmA<br>(119) | 16-24 (9)   | 16-22 (7)   | 16-22 (7)   | N | 0.62 | 0.39 | 100.00%<br>(119/119) | 98.32%<br>(117/119) |  <p>Seminal ribonuclease<br/>Ribonuclease, seminal</p>    |
|     | 1r5cA<br>(124) | 16-24 (9)   | 16-22 (7)   | 16-22 (7)   |   |      |      |                      |                     |                                                                                                                                               |
| 728 | 3bcmA<br>(119) | 112-113 (2) | 112-113 (2) | 112-113 (2) | C | 0.74 | 0.59 | 100.00%<br>(119/119) | 83.19%<br>(99/119)  |  <p>Seminal ribonuclease<br/>Ribonuclease A</p>          |
|     | 1js0A<br>(124) | 112-113 (2) | 112-113 (2) | 112-113 (2) |   |      |      |                      |                     |                                                                                                                                               |

|     |                |           |           |           |   |      |      |                      |                     |                                                                                                                                                                                                                                             |
|-----|----------------|-----------|-----------|-----------|---|------|------|----------------------|---------------------|---------------------------------------------------------------------------------------------------------------------------------------------------------------------------------------------------------------------------------------------|
| 729 | 3bcmA<br>(119) | 16-24 (9) | 16-22 (7) | 16-22 (7) | N | 0.59 | 0.42 | 100.00%<br>(119/119) | 98.32%<br>(117/119) | <br><br>Seminal ribonuclease<br>Protein (bovine seminal ribonuclease) |
|     | 11bgA<br>(124) | 16-24 (9) | 16-22 (7) | 16-22 (7) |   |      |      |                      |                     |                                                                                                                                                                                                                                             |
| 730 | 3bcmA<br>(119) | 15-22 (8) | 16-22 (7) | 16-22 (7) | N | 0.87 | 0.41 | 100.00%<br>(119/119) | 96.64%<br>(115/119) | <br><br>Seminal ribonuclease<br>Ribonuclease, seminal                |
|     | 1tq9A<br>(124) | 15-22 (8) | 16-22 (7) | 16-22 (7) |   |      |      |                      |                     |                                                                                                                                                                                                                                             |
| 731 | 3bcmA<br>(119) | 16-24 (9) | 16-22 (7) | 16-22 (7) | N | 0.58 | 0.44 | 100.00%<br>(119/119) | 98.32%<br>(117/119) | <br><br>Seminal ribonuclease<br>Ribonuclease, seminal             |
|     | 1r5dA<br>(124) | 16-24 (9) | 16-22 (7) | 16-22 (7) |   |      |      |                      |                     |                                                                                                                                                                                                                                             |

|     |                |             |             |           |   |      |      |                      |                     |                                                                                                                                                      |
|-----|----------------|-------------|-------------|-----------|---|------|------|----------------------|---------------------|------------------------------------------------------------------------------------------------------------------------------------------------------|
| 732 | 3bcmA<br>(119) | 15-22 (8)   | 15-22 (8)   | 15-22 (8) | N | 0.93 | 0.58 | 100.00%<br>(119/119) | 83.19%<br>(99/119)  | 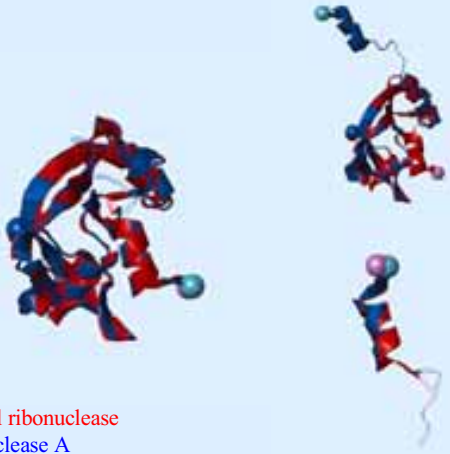 <p>Seminal ribonuclease<br/>Ribonuclease A</p>                    |
|     | 1a2wA<br>(124) | 15-22 (8)   | 15-22 (8)   | 15-22 (8) |   |      |      |                      |                     |                                                                                                                                                      |
| 733 | 3bcmA<br>(119) | 16-24 (9)   | 16-22 (7)   | 16-22 (7) | N | 0.59 | 0.36 | 100.00%<br>(119/119) | 98.32%<br>(117/119) |  <p>Seminal ribonuclease<br/>Protein (ribonuclease, seminal)</p> |
|     | 11baA<br>(124) | 16-24 (9)   | 16-22 (7)   | 16-22 (7) |   |      |      |                      |                     |                                                                                                                                                      |
| 734 | 3bcmA<br>(119) | 15-23 (9)   | 15-23 (9)   | 15-23 (9) | N | 0.85 | 1.04 | 100.00%<br>(119/119) | 75.63%<br>(90/119)  |  <p>Seminal ribonuclease<br/>Ribonuclease 1</p>                 |
|     | 1h8xA<br>(125) | 115-123 (9) | 115-123 (9) | 15-23 (9) |   |      |      |                      |                     |                                                                                                                                                      |

|     |                |           |           |           |   |      |      |                      |                     |                                                                                                                                            |
|-----|----------------|-----------|-----------|-----------|---|------|------|----------------------|---------------------|--------------------------------------------------------------------------------------------------------------------------------------------|
| 735 | 1tq9A<br>(124) | 16-22 (7) | 16-22 (7) | 18-22 (5) | N | 0.81 | 0.62 | 100.00%<br>(122/122) | 98.36%<br>(120/122) |  <p>Ribonuclease, seminal<br/>Ribonuclease, seminal</p> |
|     | 1r3mB<br>(122) | 16-22 (7) | 16-22 (7) | 18-22 (5) |   |      |      |                      |                     |                                                                                                                                            |
| 736 | 1k50A<br>(63)  | 50-56 (7) | 50-56 (7) | 53-56 (4) | C | 0.76 | 1.15 | 100.00%<br>(63/63)   | 96.83%<br>(61/63)   |  <p>Protein L<br/>Protein L</p>                         |
|     | 1k51A<br>(72)  | 50-56 (7) | 50-56 (7) | 53-56 (4) |   |      |      |                      |                     |                                                                                                                                            |
| 737 | 1k50A<br>(63)  | 50-56 (7) | 50-56 (7) | 52-56 (5) | C | 0.76 | 1.19 | 100.00%<br>(63/63)   | 93.65%<br>(59/63)   |  <p>Protein L<br/>Protein L</p>                       |
|     | 1jmlA<br>(72)  | 50-56 (7) | 50-56 (7) | 52-56 (5) |   |      |      |                      |                     |                                                                                                                                            |

|     |               |            |            |           |   |      |      |                   |                   |                                                                                                                                                  |
|-----|---------------|------------|------------|-----------|---|------|------|-------------------|-------------------|--------------------------------------------------------------------------------------------------------------------------------------------------|
| 738 | 1jmlA<br>(72) | 39-49 (21) | 40-57 (18) | 54-54 (1) | C | 0.40 | 2.36 | 83.33%<br>(60/72) | 4.17%<br>(3/72)   | 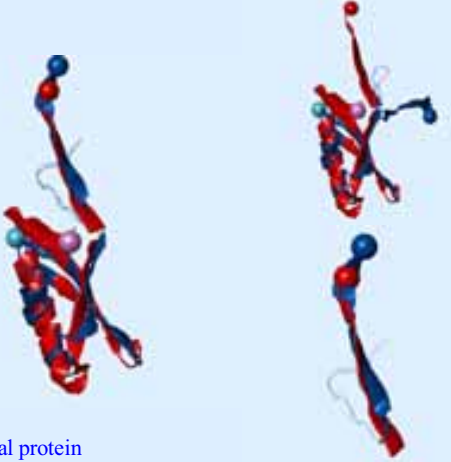 <p>Protein L<br/>Hypothetical protein</p>                     |
|     | 2hj1A<br>(77) | 49-80 (32) | 50-78 (29) | 54-54 (1) |   |      |      |                   |                   |                                                                                                                                                  |
| 739 | 1mu4A<br>(86) | 10-15 (6)  | 10-15 (6)  | 10-15 (6) | N | 0.28 | 1.55 | 60.47%<br>(52/86) | 26.74%<br>(23/86) |  <p>HPr-like protein crh<br/>Phosphocarrier protein HPr</p>   |
|     | 1y50A<br>(87) | 10-15 (6)  | 10-15 (6)  | 10-15 (6) |   |      |      |                   |                   |                                                                                                                                                  |
| 740 | 1mu4A<br>(86) | 51-56 (6)  | 52-56 (5)  | 53-55 (3) | C | 0.50 | 1.75 | 82.56%<br>(71/86) | 34.88%<br>(30/86) |  <p>HPr-like protein crh<br/>Phosphocarrier protein HPr</p> |
|     | 1y50A<br>(87) | 51-56 (6)  | 52-56 (5)  | 53-55 (3) |   |      |      |                   |                   |                                                                                                                                                  |

|     |                |              |              |             |   |      |      |                     |                    |                                                                                                                                                                 |
|-----|----------------|--------------|--------------|-------------|---|------|------|---------------------|--------------------|-----------------------------------------------------------------------------------------------------------------------------------------------------------------|
| 741 | 2ck2B<br>(96)  | 2-68 (67)    | 2-21 (20)    | 14-19 (6)   | N | 0.31 | 2.90 | 81.25%<br>(78/96)   | 9.38%<br>(9/96)    |  <p>Human fibronectin<br/>Protein (nerve growth factor receptor<br/>TRKA)</p> |
|     | 1wwaX<br>(105) | 284-357 (74) | 284-302 (19) | 14-19 (6)   |   |      |      |                     |                    |                                                                                                                                                                 |
| 742 | 1f0vA<br>(124) | 15-25 (11)   | 15-25 (11)   | 16-22 (7)   | N | 0.74 | 1.04 | 91.13%<br>(113/124) | 74.19%<br>(92/124) |  <p>Ribonuclease A<br/>Seminal ribonuclease</p>                             |
|     | 3bcpA<br>(124) | 15-25 (11)   | 15-25 (11)   | 16-22 (7)   |   |      |      |                     |                    |                                                                                                                                                                 |
| 743 | 1f0vA<br>(124) | 109-113 (5)  | 111-113 (3)  | 112-113 (2) | C | 0.65 | 0.83 | 83.87%<br>(104/124) | 69.35%<br>(86/124) |  <p>Ribonuclease A<br/>Seminal ribonuclease</p>                            |
|     | 3bcpA<br>(124) | 109-113 (5)  | 111-113 (3)  | 112-113 (2) |   |      |      |                     |                    |                                                                                                                                                                 |



|     |                |             |             |             |   |      |      |                      |                    |                                                                                                                                      |
|-----|----------------|-------------|-------------|-------------|---|------|------|----------------------|--------------------|--------------------------------------------------------------------------------------------------------------------------------------|
| 744 | 1f0vA<br>(124) | 15-22 (8)   | 15-22 (8)   | 15-22 (8)   | N | 0.44 | 0.91 | 91.13%<br>(113/124)  | 74.19%<br>(92/124) | 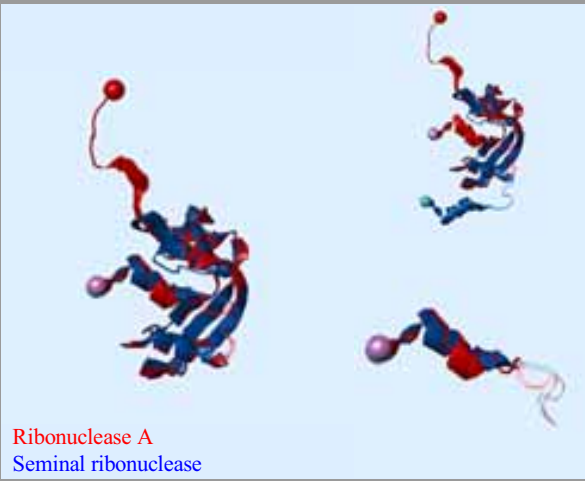 <p>Ribonuclease A<br/>Seminal ribonuclease</p>    |
|     | 3bcoA<br>(124) | 15-22 (8)   | 15-22 (8)   | 15-22 (8)   |   |      |      |                      |                    |                                                                                                                                      |
| 745 | 1f0vA<br>(124) | 111-113 (3) | 111-113 (3) | 112-113 (2) | C | 0.65 | 0.83 | 83.87%<br>(104/124)  | 69.35%<br>(86/124) |  <p>Ribonuclease A<br/>Seminal ribonuclease</p>  |
|     | 3bcoA<br>(124) | 111-113 (3) | 111-113 (3) | 112-113 (2) |   |      |      |                      |                    |                                                                                                                                      |
| 746 | 1f0vA<br>(124) | 109-113 (5) | 111-113 (3) | 112-113 (2) | C | 0.92 | 0.59 | 100.00%<br>(119/119) | 83.19%<br>(99/119) |  <p>Ribonuclease A<br/>Seminal ribonuclease</p> |
|     | 3bcmA<br>(119) | 109-113 (5) | 111-113 (3) | 112-113 (2) |   |      |      |                      |                    |                                                                                                                                      |

|     |                |             |             |             |   |      |      |                     |                    |                                                                                       |
|-----|----------------|-------------|-------------|-------------|---|------|------|---------------------|--------------------|---------------------------------------------------------------------------------------|
| 747 | 1f0vA<br>(124) | 15-22 (8)   | 15-22 (8)   | 15-22 (8)   | N | 0.42 | 0.84 | 90.32%<br>(112/124) | 72.58%<br>(90/124) | 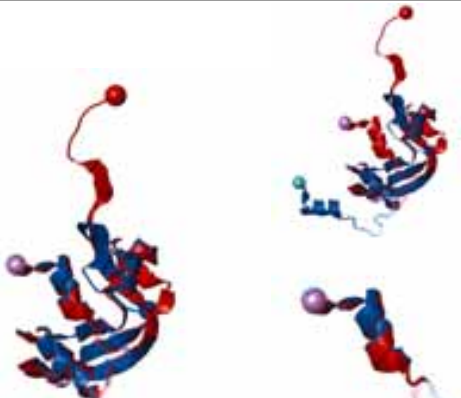    |
|     | 1r5cA<br>(124) | 15-22 (8)   | 15-22 (8)   | 15-22 (8)   |   |      |      |                     |                    |                                                                                       |
| 748 | 1f0vA<br>(124) | 111-113 (3) | 111-113 (3) | 112-113 (2) | C | 0.66 | 0.65 | 83.06%<br>(103/124) | 68.55%<br>(85/124) |    |
|     | 1r5cA<br>(124) | 111-113 (3) | 111-113 (3) | 112-113 (2) |   |      |      |                     |                    |                                                                                       |
| 749 | 1f0vA<br>(124) | 15-22 (8)   | 15-22 (8)   | 15-22 (8)   | N | 0.44 | 0.93 | 91.13%<br>(113/124) | 73.39%<br>(91/124) |  |
|     | 11bgA<br>(124) | 15-22 (8)   | 15-22 (8)   | 15-22 (8)   |   |      |      |                     |                    |                                                                                       |

|     |                |             |             |             |   |      |      |                     |                    |                                                                                                                                                    |
|-----|----------------|-------------|-------------|-------------|---|------|------|---------------------|--------------------|----------------------------------------------------------------------------------------------------------------------------------------------------|
| 750 | 1f0vA<br>(124) | 111-115 (5) | 112-114 (3) | 113-114 (2) | C | 0.65 | 0.82 | 83.87%<br>(104/124) | 69.35%<br>(86/124) | 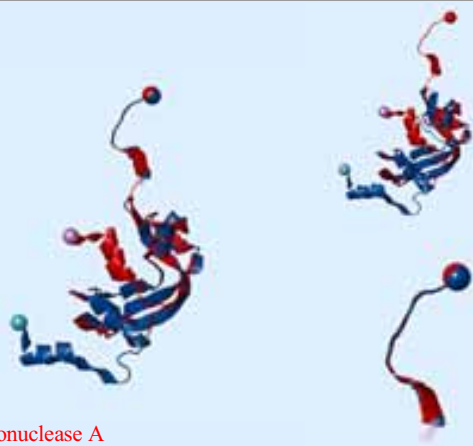 <p>Ribonuclease A<br/>Protein (bovine seminal ribonuclease)</p> |
|     | 11bgA<br>(124) | 111-115 (5) | 112-114 (3) | 113-114 (2) |   |      |      |                     |                    |                                                                                                                                                    |
| 751 | 1f0vA<br>(124) | 15-22 (8)   | 15-22 (8)   | 15-22 (8)   | N | 0.69 | 0.93 | 91.13%<br>(113/124) | 73.39%<br>(91/124) |  <p>Ribonuclease A<br/>Ribonuclease, seminal</p>               |
|     | 1tq9A<br>(124) | 15-22 (8)   | 15-22 (8)   | 15-22 (8)   |   |      |      |                     |                    |                                                                                                                                                    |
| 752 | 1f0vA<br>(124) | 111-115 (5) | 111-113 (3) | 112-113 (2) | C | 0.67 | 0.66 | 83.87%<br>(104/124) | 69.35%<br>(86/124) |  <p>Ribonuclease A<br/>Ribonuclease, seminal</p>              |
|     | 1tq9A<br>(124) | 111-115 (5) | 111-113 (3) | 112-113 (2) |   |      |      |                     |                    |                                                                                                                                                    |

|     |                |             |             |             |   |      |      |                      |                    |                                                                                                                                       |
|-----|----------------|-------------|-------------|-------------|---|------|------|----------------------|--------------------|---------------------------------------------------------------------------------------------------------------------------------------|
| 753 | 1f0vA<br>(124) | 111-113 (3) | 111-113 (3) | 112-113 (2) | C | 0.92 | 0.79 | 100.00%<br>(122/122) | 81.15%<br>(99/122) | 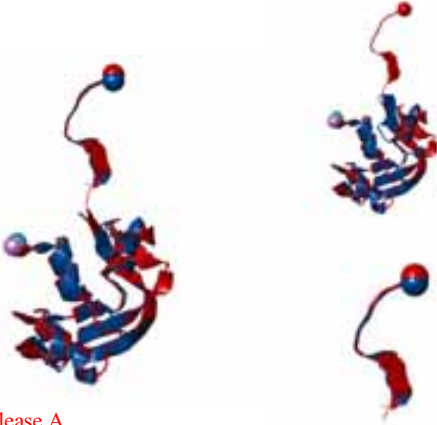 <p>Ribonuclease A<br/>Ribonuclease, seminal</p>    |
|     | 1r3mB<br>(122) | 111-113 (3) | 111-113 (3) | 112-113 (2) |   |      |      |                      |                    |                                                                                                                                       |
| 754 | 1f0vA<br>(124) | 15-22 (8)   | 15-22 (8)   | 15-22 (8)   | N | 0.42 | 0.84 | 90.32%<br>(112/124)  | 72.58%<br>(90/124) |  <p>Ribonuclease A<br/>Ribonuclease, seminal</p>  |
|     | 1r5dA<br>(124) | 15-22 (8)   | 15-22 (8)   | 15-22 (8)   |   |      |      |                      |                    |                                                                                                                                       |
| 755 | 1f0vA<br>(124) | 111-113 (3) | 111-113 (3) | 112-113 (2) | C | 0.66 | 0.66 | 83.06%<br>(103/124)  | 68.55%<br>(85/124) |  <p>Ribonuclease A<br/>Ribonuclease, seminal</p> |
|     | 1r5dA<br>(124) | 111-113 (3) | 111-113 (3) | 112-113 (2) |   |      |      |                      |                    |                                                                                                                                       |

|     |                |             |             |             |   |      |      |                     |                    |                                                                                                                                               |
|-----|----------------|-------------|-------------|-------------|---|------|------|---------------------|--------------------|-----------------------------------------------------------------------------------------------------------------------------------------------|
| 756 | 1f0vA<br>(124) | 15-22 (8)   | 15-22 (8)   | 19-22 (4)   | N | 0.40 | 0.75 | 90.32%<br>(112/124) | 72.58%<br>(90/124) | 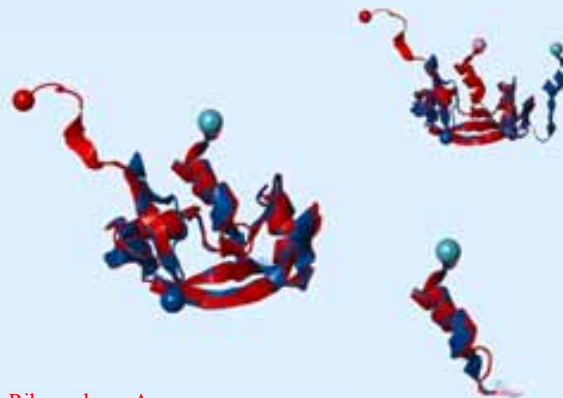 <p>Ribonuclease A<br/>Protein (ribonuclease, seminal)</p> |
|     | 11baA<br>(124) | 15-22 (8)   | 15-22 (8)   | 19-22 (4)   |   |      |      |                     |                    |                                                                                                                                               |
| 757 | 1f0vA<br>(124) | 111-115 (5) | 111-113 (3) | 112-113 (2) | C | 0.67 | 0.55 | 83.06%<br>(103/124) | 68.55%<br>(85/124) |  <p>Ribonuclease A<br/>Protein (ribonuclease, seminal)</p> |
|     | 11baA<br>(124) | 111-115 (5) | 111-113 (3) | 112-113 (2) |   |      |      |                     |                    |                                                                                                                                               |
| 758 | 1r5cA<br>(124) | 15-22 (8)   | 15-22 (8)   | 15-22 (8)   | N | 0.41 | 0.88 | 90.32%<br>(112/124) | 72.58%<br>(90/124) |  <p>Ribonuclease, seminal<br/>Ribonuclease A</p>         |
|     | ljs0A<br>(124) | 15-22 (8)   | 15-22 (8)   | 15-22 (8)   |   |      |      |                     |                    |                                                                                                                                               |

|     |                |             |             |             |   |      |      |                      |                     |                                                                                                                                            |
|-----|----------------|-------------|-------------|-------------|---|------|------|----------------------|---------------------|--------------------------------------------------------------------------------------------------------------------------------------------|
| 759 | 1r5cA<br>(124) | 111-115 (5) | 112-113 (2) | 112-113 (2) | C | 0.54 | 0.67 | 83.06%<br>(103/124)  | 68.55%<br>(85/124)  | 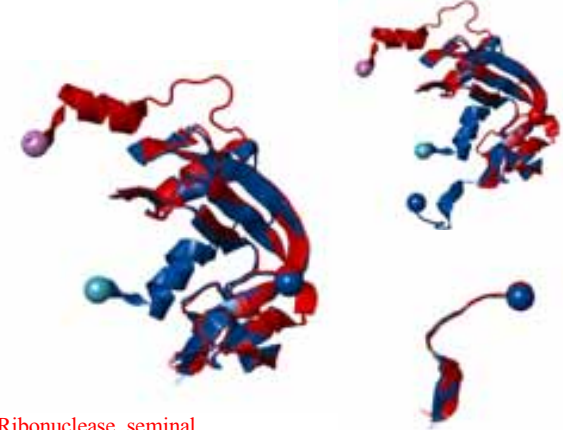 <p>Ribonuclease, seminal<br/>Ribonuclease A</p>         |
|     | 1js0A<br>(124) | 111-115 (5) | 112-113 (2) | 112-113 (2) |   |      |      |                      |                     |                                                                                                                                            |
| 760 | 1r5cA<br>(124) | 15-23 (9)   | 16-22 (7)   | 16-22 (7)   | N | 0.59 | 0.51 | 100.00%<br>(122/122) | 98.36%<br>(120/122) |  <p>Ribonuclease, seminal<br/>Ribonuclease, seminal</p> |
|     | 1r3mB<br>(122) | 15-23 (9)   | 16-22 (7)   | 16-22 (7)   |   |      |      |                      |                     |                                                                                                                                            |
| 761 | 1r5cA<br>(124) | 15-22 (8)   | 15-22 (8)   | 15-22 (8)   | N | 0.90 | 0.92 | 99.19%<br>(123/124)  | 80.65%<br>(100/124) |  <p>Ribonuclease, seminal<br/>Ribonuclease A</p>      |
|     | 1a2wA<br>(124) | 15-22 (8)   | 15-22 (8)   | 15-22 (8)   |   |      |      |                      |                     |                                                                                                                                            |

|     |                |              |             |           |   |      |      |                      |                     |                                                                                                                                            |
|-----|----------------|--------------|-------------|-----------|---|------|------|----------------------|---------------------|--------------------------------------------------------------------------------------------------------------------------------------------|
| 762 | 1r5cA<br>(124) | 15-24 (10)   | 15-23 (9)   | 15-23 (9) | N | 0.87 | 1.00 | 98.39%<br>(122/124)  | 71.77%<br>(89/124)  |  <p>Ribonuclease, seminal<br/>Ribonuclease 1</p>         |
|     | 1h8xA<br>(125) | 115-124 (10) | 115-123 (9) | 15-23 (9) |   |      |      |                      |                     |                                                                                                                                            |
| 763 | 1r3mB<br>(122) | 15-22 (8)    | 16-22 (7)   | 16-22 (7) | N | 0.61 | 0.53 | 100.00%<br>(122/122) | 99.18%<br>(121/122) |  <p>Ribonuclease, seminal<br/>Ribonuclease, seminal</p> |
|     | 1r5dA<br>(124) | 15-22 (8)    | 16-22 (7)   | 16-22 (7) |   |      |      |                      |                     |                                                                                                                                            |
| 764 | 1r3mB<br>(122) | 15-23 (9)    | 15-22 (8)   | 19-22 (4) | N | 0.93 | 0.76 | 100.00%<br>(122/122) | 81.15%<br>(99/122)  |  <p>Ribonuclease, seminal<br/>Ribonuclease A</p>      |
|     | 1a2wA<br>(124) | 15-23 (9)    | 15-22 (8)   | 19-22 (4) |   |      |      |                      |                     |                                                                                                                                            |

|     |                |              |             |             |   |      |      |                      |                     |                                                                                       |
|-----|----------------|--------------|-------------|-------------|---|------|------|----------------------|---------------------|---------------------------------------------------------------------------------------|
| 765 | 1r3mB<br>(122) | 15-22 (8)    | 15-22 (8)   | 16-22 (7)   | N | 0.56 | 0.61 | 100.00%<br>(122/122) | 99.18%<br>(121/122) |    |
|     | 11baA<br>(124) | 15-22 (8)    | 15-22 (8)   | 16-22 (7)   |   |      |      |                      |                     |                                                                                       |
| 766 | 1r3mB<br>(122) | 15-23 (9)    | 15-23 (9)   | 15-23 (9)   | N | 0.86 | 0.92 | 98.36%<br>(120/122)  | 73.77%<br>(90/122)  |    |
|     | 1h8xA<br>(125) | 115-123 (9)  | 115-123 (9) | 15-23 (9)   |   |      |      |                      |                     |                                                                                       |
| 767 | 1dz3A<br>(123) | 105-114 (10) | 105-110 (6) | 105-109 (5) | C | 0.27 | 2.52 | 78.86%<br>(97/123)   | 8.94%<br>(11/123)   |  |
|     | 2ieyA<br>(164) | 162-171 (10) | 162-167 (6) | 105-109 (5) |   |      |      |                      |                     |                                                                                       |



|     |               |            |            |           |   |      |      |                   |                  |                                                                                                                                               |
|-----|---------------|------------|------------|-----------|---|------|------|-------------------|------------------|-----------------------------------------------------------------------------------------------------------------------------------------------|
| 768 | 1q10A<br>(56) | 36-55 (20) | 37-50 (14) | 38-41 (4) | C | 0.54 | 2.28 | 98.21%<br>(55/56) | 5.36%<br>(3/56)  |  <p>Immunoglobulin G binding protein G<br/>Protein L</p>    |
|     | 1k50A<br>(63) | 39-61 (23) | 40-56 (17) | 38-41 (4) |   |      |      |                   |                  |                                                                                                                                               |
| 769 | 1q10A<br>(56) | 36-55 (20) | 37-54 (18) | 38-41 (4) | C | 0.49 | 2.18 | 98.21%<br>(55/56) | 5.36%<br>(3/56)  |  <p>Immunoglobulin G binding protein G<br/>Protein L</p>   |
|     | 1k53A<br>(72) | 39-61 (23) | 40-60 (21) | 38-41 (4) |   |      |      |                   |                  |                                                                                                                                               |
| 770 | 1q10A<br>(56) | 36-55 (20) | 37-43 (7)  | 38-42 (5) | C | 0.50 | 2.15 | 98.21%<br>(55/56) | 16.07%<br>(9/56) |  <p>Immunoglobulin G binding protein G<br/>Protein L</p> |
|     | 1k52A<br>(72) | 39-63 (25) | 40-47 (8)  | 38-42 (5) |   |      |      |                   |                  |                                                                                                                                               |

|     |               |            |            |            |   |      |      |                   |                   |                                                                                                                                                        |
|-----|---------------|------------|------------|------------|---|------|------|-------------------|-------------------|--------------------------------------------------------------------------------------------------------------------------------------------------------|
| 771 | 1q10A<br>(56) | 33-43 (11) | 33-42 (10) | 34-43 (10) | C | 0.29 | 2.91 | 87.50%<br>(49/56) | 1.79%<br>(1/56)   |  <p>Immunoglobulin G binding protein G<br/>Hypothetical protein</p> |
|     | 2hj1A<br>(77) | 46-63 (18) | 46-62 (17) | 34-43 (10) |   |      |      |                   |                   |                                                                                                                                                        |
| 772 | 2rlzA<br>(85) | 3-16 (14)  | 3-16 (14)  | 11-14 (4)  | N | 0.27 | 1.92 | 62.35%<br>(53/85) | 27.06%<br>(23/85) |  <p>HPr-like protein crh<br/>Phosphocarrier protein HPr</p>         |
|     | 1y50A<br>(87) | 3-16 (14)  | 3-16 (14)  | 11-14 (4)  |   |      |      |                   |                   |                                                                                                                                                        |
| 773 | 2rlzA<br>(85) | 50-56 (7)  | 51-56 (6)  | 52-55 (4)  | C | 0.50 | 2.00 | 85.88%<br>(73/85) | 35.29%<br>(30/85) |  <p>HPr-like protein crh<br/>Phosphocarrier protein HPr</p>       |
|     | 1y50A<br>(87) | 50-56 (7)  | 51-56 (6)  | 52-55 (4)  |   |      |      |                   |                   |                                                                                                                                                        |

|     |                |             |             |             |   |      |      |                      |                     |                                                                                                                                                                                                                                                                          |
|-----|----------------|-------------|-------------|-------------|---|------|------|----------------------|---------------------|--------------------------------------------------------------------------------------------------------------------------------------------------------------------------------------------------------------------------------------------------------------------------|
| 774 | 1wwaX<br>(105) | 378-381 (4) | 378-381 (4) | 379-379 (1) | C | 0.90 | 0.88 | 100.00%<br>(105/105) | 91.43%<br>(96/105)  |   <p>Protein (nerve growth factor receptor TRKA)<br/>HIGH affinity nerve growth factor receptor</p>  |
|     | 1he7A<br>(107) | 378-383 (6) | 378-383 (6) | 379-379 (1) |   |      |      |                      |                     |                                                                                                                                                                                                                                                                          |
| 775 | 1wwcA<br>(105) | 393-399 (7) | 395-399 (5) | 396-396 (1) | C | 0.56 | 1.51 | 84.76%<br>(89/105)   | 36.19%<br>(38/105)  |   <p>Protein (NT-3 growth factor receptor TRKC)<br/>HIGH affinity nerve growth factor receptor</p> |
|     | 1he7A<br>(107) | 376-383 (8) | 378-383 (6) | 396-396 (1) |   |      |      |                      |                     |                                                                                                                                                                                                                                                                          |
| 776 | 3bcpA<br>(124) | 15-25 (11)  | 15-25 (11)  | 15-22 (8)   | N | 0.90 | 0.97 | 100.00%<br>(124/124) | 98.39%<br>(122/124) |   <p>Seminal ribonuclease<br/>Seminal ribonuclease</p>                                         |
|     | 3bcoA<br>(124) | 15-25 (11)  | 15-25 (11)  | 15-22 (8)   |   |      |      |                      |                     |                                                                                                                                                                                                                                                                          |

|     |                |             |             |             |   |      |      |                      |                     |                                                                                       |
|-----|----------------|-------------|-------------|-------------|---|------|------|----------------------|---------------------|---------------------------------------------------------------------------------------|
| 777 | 3bcpA<br>(124) | 15-25 (11)  | 15-24 (10)  | 15-22 (8)   | N | 0.91 | 0.72 | 100.00%<br>(119/119) | 98.32%<br>(117/119) | 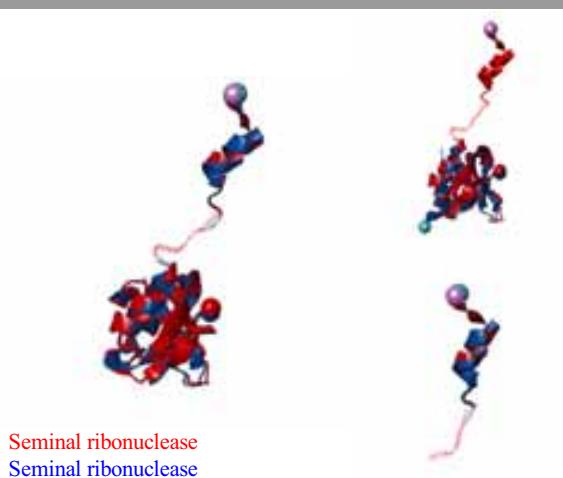    |
|     | 3bcmA<br>(119) | 15-25 (11)  | 15-24 (10)  | 15-22 (8)   |   |      |      |                      |                     |                                                                                       |
| 778 | 3bcpA<br>(124) | 15-25 (11)  | 15-25 (11)  | 16-22 (7)   | N | 0.73 | 1.03 | 90.32%<br>(112/124)  | 74.19%<br>(92/124)  |     |
|     | ljs0A<br>(124) | 15-25 (11)  | 15-25 (11)  | 16-22 (7)   |   |      |      |                      |                     |                                                                                       |
| 779 | 3bcpA<br>(124) | 108-116 (9) | 112-113 (2) | 112-113 (2) | C | 0.54 | 0.91 | 83.87%<br>(104/124)  | 69.35%<br>(86/124)  |  |
|     | ljs0A<br>(124) | 108-116 (9) | 112-113 (2) | 112-113 (2) |   |      |      |                      |                     |                                                                                       |

|     |                |             |             |             |   |      |      |                      |                     |                                                                                                                                                       |
|-----|----------------|-------------|-------------|-------------|---|------|------|----------------------|---------------------|-------------------------------------------------------------------------------------------------------------------------------------------------------|
| 780 | 3bcpA<br>(124) | 15-25 (11)  | 15-24 (10)  | 16-22 (7)   | N | 0.91 | 0.85 | 100.00%<br>(122/122) | 95.90%<br>(117/122) | 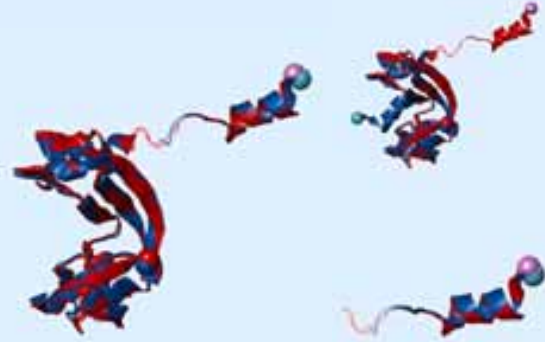 <p>Seminal ribonuclease<br/>Ribonuclease, seminal</p>             |
|     | 1r3mB<br>(122) | 15-25 (11)  | 15-24 (10)  | 16-22 (7)   |   |      |      |                      |                     |                                                                                                                                                       |
| 781 | 1js0A<br>(124) | 15-22 (8)   | 15-22 (8)   | 15-22 (8)   | N | 0.43 | 0.78 | 90.32%<br>(112/124)  | 72.58%<br>(90/124)  |  <p>Ribonuclease A<br/>Protein (bovine seminal ribonuclease)</p>   |
|     | 11bgA<br>(124) | 15-22 (8)   | 15-22 (8)   | 15-22 (8)   |   |      |      |                      |                     |                                                                                                                                                       |
| 782 | 1js0A<br>(124) | 112-115 (4) | 112-113 (2) | 112-113 (2) | C | 0.56 | 0.74 | 83.87%<br>(104/124)  | 69.35%<br>(86/124)  |  <p>Ribonuclease A<br/>Protein (bovine seminal ribonuclease)</p> |
|     | 11bgA<br>(124) | 112-115 (4) | 112-113 (2) | 112-113 (2) |   |      |      |                      |                     |                                                                                                                                                       |

|     |                |             |             |             |   |      |      |                      |                    |                                                                                                                                       |
|-----|----------------|-------------|-------------|-------------|---|------|------|----------------------|--------------------|---------------------------------------------------------------------------------------------------------------------------------------|
| 783 | ljs0A<br>(124) | 15-22 (8)   | 15-22 (8)   | 15-22 (8)   | N | 0.73 | 0.78 | 90.32%<br>(112/124)  | 72.58%<br>(90/124) |  <p>Ribonuclease A<br/>Ribonuclease, seminal</p>   |
|     | ltq9A<br>(124) | 15-22 (8)   | 15-22 (8)   | 15-22 (8)   |   |      |      |                      |                    |                                                                                                                                       |
| 784 | ljs0A<br>(124) | 112-113 (2) | 112-113 (2) | 112-113 (2) | C | 0.57 | 0.66 | 83.87%<br>(104/124)  | 69.35%<br>(86/124) |  <p>Ribonuclease A<br/>Ribonuclease, seminal</p>  |
|     | ltq9A<br>(124) | 112-113 (2) | 112-113 (2) | 112-113 (2) |   |      |      |                      |                    |                                                                                                                                       |
| 785 | ljs0A<br>(124) | 111-113 (3) | 112-113 (2) | 112-113 (2) | C | 0.76 | 0.79 | 100.00%<br>(122/122) | 81.15%<br>(99/122) |  <p>Ribonuclease A<br/>Ribonuclease, seminal</p> |
|     | lr3mB<br>(122) | 111-113 (3) | 112-113 (2) | 112-113 (2) |   |      |      |                      |                    |                                                                                                                                       |

|     |                |             |             |             |   |      |      |                     |                    |                                                                                                                                                 |
|-----|----------------|-------------|-------------|-------------|---|------|------|---------------------|--------------------|-------------------------------------------------------------------------------------------------------------------------------------------------|
| 786 | ljs0A<br>(124) | 15-22 (8)   | 15-22 (8)   | 15-22 (8)   | N | 0.44 | 0.91 | 90.32%<br>(112/124) | 72.58%<br>(90/124) |  <p>Ribonuclease A<br/>Ribonuclease, seminal</p>             |
|     | 1r5dA<br>(124) | 15-22 (8)   | 15-22 (8)   | 15-22 (8)   |   |      |      |                     |                    |                                                                                                                                                 |
| 787 | ljs0A<br>(124) | 112-113 (2) | 112-113 (2) | 112-113 (2) | C | 0.53 | 0.70 | 83.06%<br>(103/124) | 68.55%<br>(85/124) |  <p>Ribonuclease A<br/>Ribonuclease, seminal</p>             |
|     | 1r5dA<br>(124) | 112-113 (2) | 112-113 (2) | 112-113 (2) |   |      |      |                     |                    |                                                                                                                                                 |
| 788 | ljs0A<br>(124) | 15-22 (8)   | 15-22 (8)   | 19-22 (4)   | N | 0.41 | 0.76 | 90.32%<br>(112/124) | 72.58%<br>(90/124) |  <p>Ribonuclease A<br/>Protein (ribonuclease, seminal)</p> |
|     | 11baA<br>(124) | 15-22 (8)   | 15-22 (8)   | 19-22 (4)   |   |      |      |                     |                    |                                                                                                                                                 |

|     |                |              |             |             |   |      |      |                     |                     |                                                                                                                                               |
|-----|----------------|--------------|-------------|-------------|---|------|------|---------------------|---------------------|-----------------------------------------------------------------------------------------------------------------------------------------------|
| 789 | 1js0A<br>(124) | 111-115 (5)  | 112-113 (2) | 112-113 (2) | C | 0.57 | 0.50 | 83.06%<br>(103/124) | 68.55%<br>(85/124)  |  <p>Ribonuclease A<br/>Protein (ribonuclease, seminal)</p> |
|     | 1lbaA<br>(124) | 111-115 (5)  | 112-113 (2) | 112-113 (2) |   |      |      |                     |                     |                                                                                                                                               |
| 790 | 1r5dA<br>(124) | 15-22 (8)    | 15-22 (8)   | 15-22 (8)   | N | 0.90 | 0.92 | 99.19%<br>(123/124) | 80.65%<br>(100/124) |  <p>Ribonuclease, seminal<br/>Ribonuclease A</p>           |
|     | 1a2wA<br>(124) | 15-22 (8)    | 15-22 (8)   | 15-22 (8)   |   |      |      |                     |                     |                                                                                                                                               |
| 791 | 1r5dA<br>(124) | 15-24 (10)   | 15-23 (9)   | 15-23 (9)   | N | 0.86 | 1.01 | 98.39%<br>(122/124) | 71.77%<br>(89/124)  |  <p>Ribonuclease, seminal<br/>Ribonuclease 1</p>         |
|     | 1h8xA<br>(125) | 115-124 (10) | 115-123 (9) | 15-23 (9)   |   |      |      |                     |                     |                                                                                                                                               |



|     |                |              |              |              |   |      |      |                     |                     |                                                                                                                                                                                                                                                                                |
|-----|----------------|--------------|--------------|--------------|---|------|------|---------------------|---------------------|--------------------------------------------------------------------------------------------------------------------------------------------------------------------------------------------------------------------------------------------------------------------------------|
| 792 | 1g85A<br>(159) | 121-123 (3)  | 121-123 (3)  | 121-123 (3)  | C | 0.76 | 0.88 | 97.32%<br>(145/149) | 92.62%<br>(138/149) |   <p>Odorant-binding protein<br/>Odorant-binding protein</p>                                             |
|     | 2hivA<br>(149) | 121-123 (3)  | 121-123 (3)  | 121-123 (3)  |   |      |      |                     |                     |                                                                                                                                                                                                                                                                                |
| 793 | 1oy0A<br>(248) | 217-254 (38) | 220-254 (35) | 230-254 (25) | C | 0.30 | 2.26 | 83.87%<br>(208/248) | 15.32%<br>(38/248)  |   <p>Ketopantoate<br/>hydroxymethyltransferase<br/>PA4872 oxaloacetate decarboxylase</p>                 |
|     | 3b8iA<br>(283) | 207-237 (31) | 210-237 (28) | 230-254 (25) |   |      |      |                     |                     |                                                                                                                                                                                                                                                                                |
| 794 | 1dktB<br>(71)  | 60-74 (15)   | 60-65 (6)    | 60-65 (6)    | C | 0.79 | 1.18 | 100.00%<br>(71/71)  | 84.51%<br>(60/71)   |   <p>Cyclin dependent kinase subunit,<br/>TYPE 1<br/>Cyclin-dependent kinase subunit,<br/>TYPE 2</p> |
|     | 1cksB<br>(78)  | 60-74 (15)   | 60-65 (6)    | 60-65 (6)    |   |      |      |                     |                     |                                                                                                                                                                                                                                                                                |

|     |                |              |             |           |   |      |      |                    |                   |                                                                                                                                                                                                                                                                              |
|-----|----------------|--------------|-------------|-----------|---|------|------|--------------------|-------------------|------------------------------------------------------------------------------------------------------------------------------------------------------------------------------------------------------------------------------------------------------------------------------|
| 795 | 1dktB<br>(71)  | 56-65 (10)   | 56-63 (8)   | 57-63 (7) | C | 0.50 | 1.31 | 95.77%<br>(68/71)  | 53.52%<br>(38/71) |   <p>Cyclin dependent kinase subunit,<br/>TYPE 1<br/>Cyclin-dependent kinases regulatory<br/>subunit</p> |
|     | 1qb3C<br>(109) | 487-496 (10) | 487-494 (8) | 57-63 (7) |   |      |      |                    |                   |                                                                                                                                                                                                                                                                              |
| 796 | 1buhB<br>(70)  | 59-65 (7)    | 59-65 (7)   | 60-65 (6) | C | 0.79 | 1.11 | 100.00%<br>(70/70) | 84.29%<br>(59/70) |   <p>Protein (ckshs1 human)<br/>Cyclin-dependent kinase subunit,<br/>TYPE 2</p>                        |
|     | 1cksB<br>(78)  | 59-65 (7)    | 59-65 (7)   | 60-65 (6) |   |      |      |                    |                   |                                                                                                                                                                                                                                                                              |
| 797 | 1buhB<br>(70)  | 56-64 (9)    | 57-64 (8)   | 57-63 (7) | C | 0.49 | 1.59 | 98.57%<br>(69/70)  | 55.71%<br>(39/70) |   <p>Protein (ckshs1 human)<br/>Cyclin-dependent kinases regulatory<br/>subunit</p>                |
|     | 1qb3C<br>(109) | 487-495 (9)  | 488-495 (8) | 57-63 (7) |   |      |      |                    |                   |                                                                                                                                                                                                                                                                              |

|     |                |               |               |               |   |      |      |                    |                   |                                                                                                                                                                                                                                                                               |
|-----|----------------|---------------|---------------|---------------|---|------|------|--------------------|-------------------|-------------------------------------------------------------------------------------------------------------------------------------------------------------------------------------------------------------------------------------------------------------------------------|
| 798 | 1dktA<br>(72)  | 60-70 (11)    | 60-66 (7)     | 61-65 (5)     | C | 0.82 | 1.09 | 100.00%<br>(72/72) | 83.33%<br>(60/72) |  <br>Cyclin dependent kinase subunit,<br>TYPE 1<br>Cyclin-dependent kinase subunit,<br>TYPE 2           |
|     | 1cksB<br>(78)  | 60-70 (11)    | 60-66 (7)     | 61-65 (5)     |   |      |      |                    |                   |                                                                                                                                                                                                                                                                               |
| 799 | 1dktA<br>(72)  | 56-64 (9)     | 57-63 (7)     | 57-63 (7)     | C | 0.47 | 1.58 | 95.83%<br>(69/72)  | 54.17%<br>(39/72) |  <br>Cyclin dependent kinase subunit,<br>TYPE 1<br>Cyclin-dependent kinases regulatory<br>subunit       |
|     | 1qb3C<br>(109) | 487-495 (9)   | 488-494 (7)   | 57-63 (7)     |   |      |      |                    |                   |                                                                                                                                                                                                                                                                               |
| 800 | 2astC<br>(69)  | 3060-3065 (6) | 3060-3065 (6) | 3060-3065 (6) | C | 0.79 | 1.01 | 100.00%<br>(69/69) | 84.06%<br>(58/69) |  <br>Cyclin-dependent kinases regulatory<br>subunit 1<br>Cyclin-dependent kinase subunit,<br>TYPE 2 |
|     | 1cksB<br>(78)  | 60-65 (6)     | 60-65 (6)     | 3060-3065 (6) |   |      |      |                    |                   |                                                                                                                                                                                                                                                                               |

|     |                |               |               |               |   |      |      |                   |                   |                                                                                                                                                                                         |
|-----|----------------|---------------|---------------|---------------|---|------|------|-------------------|-------------------|-----------------------------------------------------------------------------------------------------------------------------------------------------------------------------------------|
| 801 | 2astC<br>(69)  | 3056-3063 (8) | 3057-3063 (7) | 3057-3063 (7) | C | 0.48 | 1.62 | 98.55%<br>(68/69) | 56.52%<br>(39/69) | 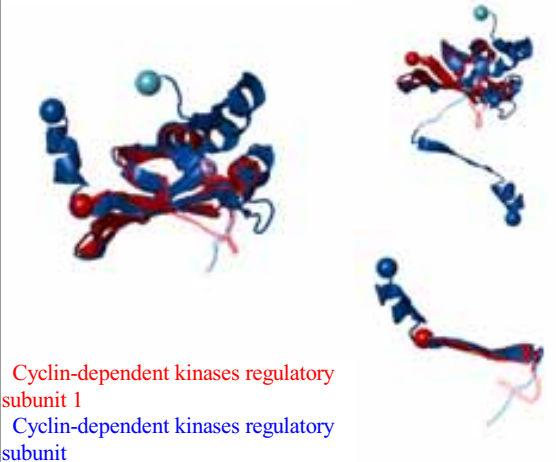 <p>Cyclin-dependent kinases regulatory subunit 1<br/>Cyclin-dependent kinases regulatory subunit</p> |
|     | 1qb3C<br>(109) | 487-494 (8)   | 488-494 (7)   | 3057-3063 (7) |   |      |      |                   |                   |                                                                                                                                                                                         |
| 802 | 2hdxA<br>(108) | 587-593 (7)   | 587-593 (7)   | 588-593 (6)   | C | 0.57 | 2.00 | 94.90%<br>(93/98) | 23.47%<br>(23/98) |  <p>SH2-B PH domain containing signaling mediator<br/>Growth receptor binding protein 2</p>         |
|     | 2h46E<br>(98)  | 118-124 (7)   | 118-124 (7)   | 588-593 (6)   |   |      |      |                   |                   |                                                                                                                                                                                         |
| 803 | 2hdxA<br>(108) | 568-593 (26)  | 579-593 (15)  | 588-593 (6)   | C | 0.61 | 1.82 | 96.88%<br>(93/96) | 21.88%<br>(21/96) |  <p>SH2-B PH domain containing signaling mediator<br/>Growth factor receptor-bound protein 2</p>   |
|     | 2h5kB<br>(96)  | 99-124 (26)   | 110-124 (15)  | 588-593 (6)   |   |      |      |                   |                   |                                                                                                                                                                                         |

|     |                |              |             |             |   |      |      |                   |                   |                                                                                                                                                                                               |
|-----|----------------|--------------|-------------|-------------|---|------|------|-------------------|-------------------|-----------------------------------------------------------------------------------------------------------------------------------------------------------------------------------------------|
| 804 | 2hdxA<br>(108) | 531-596 (46) | 588-593 (6) | 588-593 (6) | C | 0.45 | 1.83 | 96.77%<br>(90/93) | 22.58%<br>(21/93) |  <p>SH2-B PH domain containing<br/>signaling mediator<br/>Growth factor receptor-bound protein<br/>2</p>    |
|     | 2aobB<br>(93)  | 82-127 (46)  | 119-124 (6) | 588-593 (6) |   |      |      |                   |                   |                                                                                                                                                                                               |
| 805 | 2hdxA<br>(108) | 556-593 (38) | 588-593 (6) | 588-593 (6) | C | 0.48 | 1.68 | 95.83%<br>(92/96) | 21.88%<br>(21/96) |  <p>SH2-B PH domain containing<br/>signaling mediator<br/>Growth factor receptor-bound protein<br/>2</p>  |
|     | 2aobA<br>(96)  | 87-124 (38)  | 119-124 (6) | 588-593 (6) |   |      |      |                   |                   |                                                                                                                                                                                               |
| 806 | 2hdxA<br>(108) | 560-593 (34) | 588-593 (6) | 588-593 (6) | C | 0.48 | 1.62 | 96.77%<br>(90/93) | 22.58%<br>(21/93) |  <p>SH2-B PH domain containing<br/>signaling mediator<br/>Growth factor receptor-bound protein<br/>2</p> |
|     | 2aoaA<br>(93)  | 91-124 (34)  | 119-124 (6) | 588-593 (6) |   |      |      |                   |                   |                                                                                                                                                                                               |

|     |                |              |              |             |   |      |      |                   |                   |                                                                                                                                                                                                                                                                                                                                                                 |
|-----|----------------|--------------|--------------|-------------|---|------|------|-------------------|-------------------|-----------------------------------------------------------------------------------------------------------------------------------------------------------------------------------------------------------------------------------------------------------------------------------------------------------------------------------------------------------------|
| 807 | 1p13A<br>(102) | 223-232 (10) | 223-232 (10) | 229-232 (4) | C | 0.63 | 1.74 | 96.94%<br>(95/98) | 29.59%<br>(29/98) | <br><br><br>Proto-oncogene tyrosine-protein kinase Src<br>Growth receptor binding protein 2             |
|     | 2h46E<br>(98)  | 116-124 (9)  | 116-124 (9)  | 229-232 (4) |   |      |      |                   |                   |                                                                                                                                                                                                                                                                                                                                                                 |
| 808 | 1p13A<br>(102) | 219-232 (14) | 223-232 (10) | 228-232 (5) | C | 0.66 | 1.65 | 97.92%<br>(94/96) | 29.17%<br>(28/96) | <br><br><br>Proto-oncogene tyrosine-protein kinase Src<br>Growth factor receptor-bound protein 2      |
|     | 2h5kB<br>(96)  | 112-124 (13) | 116-124 (9)  | 228-232 (5) |   |      |      |                   |                   |                                                                                                                                                                                                                                                                                                                                                                 |
| 809 | 1p13A<br>(102) | 228-232 (5)  | 229-232 (4)  | 229-232 (4) | C | 0.66 | 1.28 | 97.85%<br>(91/93) | 32.26%<br>(30/93) | <br><br><br>Proto-oncogene tyrosine-protein kinase Src<br>Growth factor receptor-bound protein 2 |
|     | 2aobB<br>(93)  | 121-124 (4)  | 122-124 (3)  | 229-232 (4) |   |      |      |                   |                   |                                                                                                                                                                                                                                                                                                                                                                 |

|     |                |              |              |             |   |      |      |                   |                   |                                                                                                                                                                                                                                                                 |
|-----|----------------|--------------|--------------|-------------|---|------|------|-------------------|-------------------|-----------------------------------------------------------------------------------------------------------------------------------------------------------------------------------------------------------------------------------------------------------------|
| 810 | 1p13A<br>(102) | 228-232 (5)  | 228-232 (5)  | 229-232 (4) | C | 0.58 | 1.79 | 97.92%<br>(94/96) | 30.21%<br>(29/96) |  <br>Proto-oncogene tyrosine-protein kinase Src<br>Growth factor receptor-bound protein 2   |
|     | 2aobA<br>(96)  | 121-124 (4)  | 121-124 (4)  | 229-232 (4) |   |      |      |                   |                   |                                                                                                                                                                                                                                                                 |
| 811 | 1p13A<br>(102) | 227-232 (6)  | 228-232 (5)  | 229-232 (4) | C | 0.58 | 1.68 | 98.92%<br>(92/93) | 31.18%<br>(29/93) |  <br>Proto-oncogene tyrosine-protein kinase Src<br>Growth factor receptor-bound protein 2 |
|     | 2aoaA<br>(93)  | 120-124 (5)  | 121-124 (4)  | 229-232 (4) |   |      |      |                   |                   |                                                                                                                                                                                                                                                                 |
| 812 | 1rjaA<br>(100) | 45-74 (30)   | 56-73 (18)   | 66-70 (5)   | C | 0.60 | 1.90 | 92.86%<br>(91/98) | 38.78%<br>(38/98) |  <br>Tyrosine-protein kinase 6<br>Growth receptor binding protein 2                   |
|     | 2h46E<br>(98)  | 100-128 (29) | 111-127 (17) | 66-70 (5)   |   |      |      |                   |                   |                                                                                                                                                                                                                                                                 |

|     |                |              |              |           |   |      |      |                   |                   |                                                                                                                                                                   |
|-----|----------------|--------------|--------------|-----------|---|------|------|-------------------|-------------------|-------------------------------------------------------------------------------------------------------------------------------------------------------------------|
| 813 | IrjaA<br>(100) | 56-76 (21)   | 56-69 (14)   | 66-70 (5) | C | 0.62 | 1.90 | 94.79%<br>(91/96) | 39.58%<br>(38/96) | 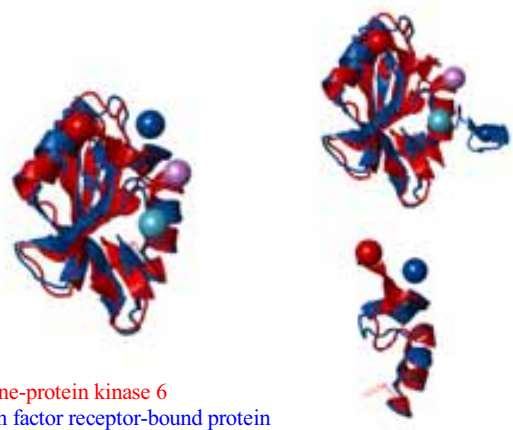 <p>Tyrosine-protein kinase 6<br/>Growth factor receptor-bound protein 2</p>    |
|     | 2h5kB<br>(96)  | 111-130 (20) | 111-123 (13) | 66-70 (5) |   |      |      |                   |                   |                                                                                                                                                                   |
| 814 | IrjaA<br>(100) | 45-75 (31)   | 57-70 (14)   | 67-70 (4) | C | 0.42 | 1.84 | 94.62%<br>(88/93) | 39.78%<br>(37/93) |  <p>Tyrosine-protein kinase 6<br/>Growth factor receptor-bound protein 2</p>   |
|     | 2aobB<br>(93)  | 100-129 (30) | 112-124 (13) | 67-70 (4) |   |      |      |                   |                   |                                                                                                                                                                   |
| 815 | IrjaA<br>(100) | 45-75 (31)   | 57-70 (14)   | 66-70 (5) | C | 0.43 | 1.62 | 92.71%<br>(89/96) | 38.54%<br>(37/96) |  <p>Tyrosine-protein kinase 6<br/>Growth factor receptor-bound protein 2</p> |
|     | 2aobA<br>(96)  | 100-129 (30) | 112-124 (13) | 66-70 (5) |   |      |      |                   |                   |                                                                                                                                                                   |



|     |                |              |              |             |   |      |      |                   |                   |                                                                                                                                                                                                                                                              |
|-----|----------------|--------------|--------------|-------------|---|------|------|-------------------|-------------------|--------------------------------------------------------------------------------------------------------------------------------------------------------------------------------------------------------------------------------------------------------------|
| 816 | 1rjaA<br>(100) | 45-72 (28)   | 57-72 (16)   | 66-70 (5)   | C | 0.43 | 1.72 | 95.70%<br>(89/93) | 38.71%<br>(36/93) |   <p>Tyrosine-protein kinase 6<br/>Growth factor receptor-bound protein 2</p>          |
|     | 2aoaA<br>(93)  | 100-126 (27) | 112-126 (15) | 66-70 (5)   |   |      |      |                   |                   |                                                                                                                                                                                                                                                              |
| 817 | 1r1pB<br>(100) | 120-122 (3)  | 120-122 (3)  | 120-122 (3) | C | 0.83 | 0.97 | 96.94%<br>(95/98) | 52.04%<br>(51/98) |   <p>GRB2-related adaptor protein 2<br/>Growth receptor binding protein 2</p>          |
|     | 2h46E<br>(98)  | 121-123 (3)  | 121-123 (3)  | 120-122 (3) |   |      |      |                   |                   |                                                                                                                                                                                                                                                              |
| 818 | 1r1pB<br>(100) | 117-125 (9)  | 118-122 (5)  | 120-122 (3) | C | 0.84 | 0.79 | 96.88%<br>(93/96) | 53.13%<br>(51/96) |   <p>GRB2-related adaptor protein 2<br/>Growth factor receptor-bound protein 2</p> |
|     | 2h5kB<br>(96)  | 118-126 (9)  | 119-123 (5)  | 120-122 (3) |   |      |      |                   |                   |                                                                                                                                                                                                                                                              |

|     |                |             |             |             |   |      |      |                   |                   |                                                                                                                                                                        |
|-----|----------------|-------------|-------------|-------------|---|------|------|-------------------|-------------------|------------------------------------------------------------------------------------------------------------------------------------------------------------------------|
| 819 | 1r1pB<br>(100) | 120-123 (4) | 120-123 (4) | 120-122 (3) | C | 0.75 | 1.22 | 96.77%<br>(90/93) | 53.76%<br>(50/93) |  <p>GRB2-related adaptor protein 2<br/>Growth factor receptor-bound protein 2</p>   |
|     | 2aobB<br>(93)  | 121-124 (4) | 121-124 (4) | 120-122 (3) |   |      |      |                   |                   |                                                                                                                                                                        |
| 820 | 1r1pB<br>(100) | 119-125 (7) | 120-123 (4) | 120-122 (3) | C | 0.82 | 1.05 | 97.92%<br>(94/96) | 53.13%<br>(51/96) |  <p>GRB2-related adaptor protein 2<br/>Growth factor receptor-bound protein 2</p>   |
|     | 2aobA<br>(96)  | 120-126 (7) | 121-124 (4) | 120-122 (3) |   |      |      |                   |                   |                                                                                                                                                                        |
| 821 | 1r1pB<br>(100) | 120-123 (4) | 120-123 (4) | 120-122 (3) | C | 0.82 | 0.98 | 98.92%<br>(92/93) | 55.91%<br>(52/93) |  <p>GRB2-related adaptor protein 2<br/>Growth factor receptor-bound protein 2</p> |
|     | 2aobA<br>(93)  | 121-124 (4) | 121-124 (4) | 120-122 (3) |   |      |      |                   |                   |                                                                                                                                                                        |

|     |                |              |              |           |   |      |      |                   |                   |                                                                                                                                                                                |
|-----|----------------|--------------|--------------|-----------|---|------|------|-------------------|-------------------|--------------------------------------------------------------------------------------------------------------------------------------------------------------------------------|
| 822 | 1fhsA<br>(112) | 61-76 (16)   | 61-74 (14)   | 70-73 (4) | C | 0.45 | 1.73 | 97.92%<br>(94/96) | 90.63%<br>(87/96) | 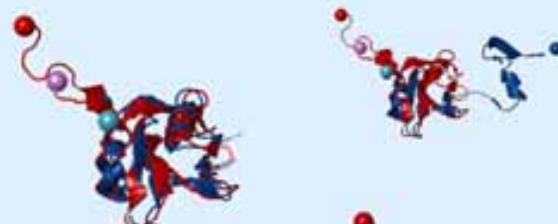 <p>Growth factor receptor bound protein-2<br/>Growth factor receptor-bound protein 2</p>   |
|     | 2h5kB<br>(96)  | 112-127 (16) | 112-125 (14) | 70-73 (4) |   |      |      |                   |                   |                                                                                                                                                                                |
| 823 | 1fhsA<br>(112) | 57-76 (20)   | 58-74 (17)   | 69-72 (4) | C | 0.29 | 1.50 | 98.92%<br>(92/93) | 95.70%<br>(89/93) |  <p>Growth factor receptor bound protein-2<br/>Growth factor receptor-bound protein 2</p>   |
|     | 2aobB<br>(93)  | 108-127 (20) | 109-125 (17) | 69-72 (4) |   |      |      |                   |                   |                                                                                                                                                                                |
| 824 | 1fhsA<br>(112) | 56-76 (21)   | 61-74 (14)   | 70-72 (3) | C | 0.27 | 1.70 | 96.88%<br>(93/96) | 91.67%<br>(88/96) |  <p>Growth factor receptor bound protein-2<br/>Growth factor receptor-bound protein 2</p> |
|     | 2aobA<br>(96)  | 107-127 (21) | 112-125 (14) | 70-72 (3) |   |      |      |                   |                   |                                                                                                                                                                                |

|     |                |              |              |           |   |      |      |                     |                    |                                                                                                                                                                                                                                                                    |
|-----|----------------|--------------|--------------|-----------|---|------|------|---------------------|--------------------|--------------------------------------------------------------------------------------------------------------------------------------------------------------------------------------------------------------------------------------------------------------------|
| 825 | 1fhsA<br>(112) | 61-80 (20)   | 61-76 (16)   | 69-73 (5) | C | 0.26 | 1.57 | 97.85%<br>(91/93)   | 92.47%<br>(86/93)  | <br><br>Growth factor receptor bound<br>protein-2<br>Growth factor receptor-bound protein<br>2 |
|     | 2aooA<br>(93)  | 112-131 (20) | 112-127 (16) | 69-73 (5) |   |      |      |                     |                    |                                                                                                                                                                                                                                                                    |
| 826 | 2jziA<br>(116) | 35-55 (21)   | 50-55 (6)    | 50-55 (6) | C | 0.54 | 1.27 | 99.01%<br>(100/101) | 25.74%<br>(26/101) | <br><br>Cyanovirin-N homolog<br>Cyanovirin-N                                                |
|     | 115eA<br>(101) | 34-54 (21)   | 49-54 (6)    | 50-55 (6) |   |      |      |                     |                    |                                                                                                                                                                                                                                                                    |
| 827 | 2z21A<br>(102) | 49-54 (6)    | 49-54 (6)    | 50-54 (5) | N | 0.91 | 0.79 | 99.01%<br>(100/101) | 94.06%<br>(95/101) | <br><br>Cyanovirin-N<br>Cyanovirin-N                                                     |
|     | 115eA<br>(101) | 49-54 (6)    | 49-54 (6)    | 50-54 (5) |   |      |      |                     |                    |                                                                                                                                                                                                                                                                    |

|     |                |           |           |           |   |      |      |                     |                    |                                                                                                                       |
|-----|----------------|-----------|-----------|-----------|---|------|------|---------------------|--------------------|-----------------------------------------------------------------------------------------------------------------------|
| 828 | 2z21A<br>(102) | 49-53 (5) | 49-53 (5) | 50-53 (4) | N | 0.89 | 0.71 | 99.01%<br>(100/101) | 94.06%<br>(95/101) | <br>Cyanovirin-N<br>Cyanovirin-N   |
|     | 1lomA<br>(101) | 49-53 (5) | 49-53 (5) | 50-53 (4) |   |      |      |                     |                    |                                                                                                                       |
| 829 | 2rdkA<br>(101) | 49-54 (6) | 49-54 (6) | 50-54 (5) | N | 0.90 | 0.79 | 98.02%<br>(99/101)  | 93.07%<br>(94/101) | <br>Cyanovirin-N<br>Cyanovirin-N   |
|     | 115eA<br>(101) | 49-54 (6) | 49-54 (6) | 50-54 (5) |   |      |      |                     |                    |                                                                                                                       |
| 830 | 2rdkA<br>(101) | 49-53 (5) | 49-53 (5) | 50-53 (4) | N | 0.83 | 0.69 | 98.02%<br>(99/101)  | 93.07%<br>(94/101) | <br>Cyanovirin-N<br>Cyanovirin-N |
|     | 1lomA<br>(101) | 49-53 (5) | 49-53 (5) | 50-53 (4) |   |      |      |                     |                    |                                                                                                                       |

|     |                |            |           |           |   |      |      |                    |                    |                                                                                                                               |
|-----|----------------|------------|-----------|-----------|---|------|------|--------------------|--------------------|-------------------------------------------------------------------------------------------------------------------------------|
| 831 | 2z21B<br>(102) | 49-56 (8)  | 49-54 (6) | 50-54 (5) | N | 0.90 | 0.74 | 98.02%<br>(99/101) | 93.07%<br>(94/101) | 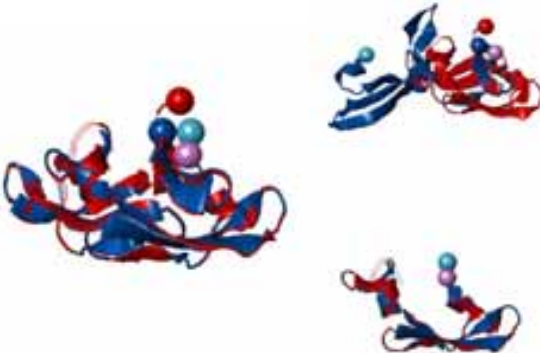<br>Cyanovirin-N<br>Cyanovirin-N           |
|     | 115eA<br>(101) | 49-56 (8)  | 49-54 (6) | 50-54 (5) |   |      |      |                    |                    |                                                                                                                               |
| 832 | 2z21B<br>(102) | 49-53 (5)  | 49-53 (5) | 50-53 (4) | N | 0.87 | 0.65 | 98.02%<br>(99/101) | 93.07%<br>(94/101) | <br>Cyanovirin-N<br>Cyanovirin-N           |
|     | 11omA<br>(101) | 49-53 (5)  | 49-53 (5) | 50-53 (4) |   |      |      |                    |                    |                                                                                                                               |
| 833 | 2jzkA<br>(103) | 48-70 (23) | 49-55 (7) | 51-55 (5) | N | 0.71 | 1.43 | 94.06%<br>(95/101) | 25.74%<br>(26/101) | <br>Cyanovirin-N homolog<br>Cyanovirin-N |
|     | 115eA<br>(101) | 47-68 (22) | 48-54 (7) | 51-55 (5) |   |      |      |                    |                    |                                                                                                                               |

|     |                |           |           |           |   |      |      |                    |                    |                                                                                                                       |
|-----|----------------|-----------|-----------|-----------|---|------|------|--------------------|--------------------|-----------------------------------------------------------------------------------------------------------------------|
| 834 | 2rdkB<br>(99)  | 49-57 (9) | 49-54 (6) | 50-54 (5) | N | 0.91 | 0.73 | 98.99%<br>(98/99)  | 93.94%<br>(93/99)  | 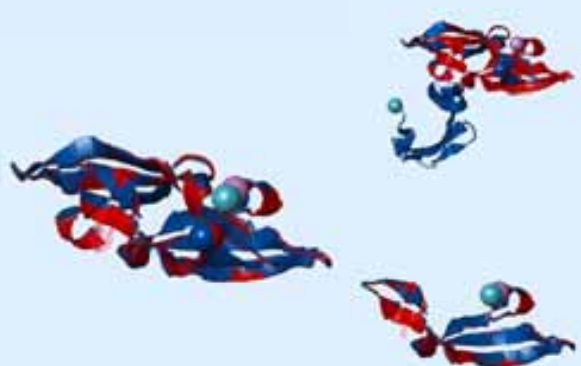<br>Cyanovirin-N<br>Cyanovirin-N   |
|     | 115eA<br>(101) | 49-57 (9) | 49-54 (6) | 50-54 (5) |   |      |      |                    |                    |                                                                                                                       |
| 835 | 2rdkB<br>(99)  | 49-53 (5) | 49-53 (5) | 50-53 (4) | N | 0.90 | 0.64 | 98.99%<br>(98/99)  | 93.94%<br>(93/99)  | <br>Cyanovirin-N<br>Cyanovirin-N   |
|     | 11omA<br>(101) | 49-53 (5) | 49-53 (5) | 50-53 (4) |   |      |      |                    |                    |                                                                                                                       |
| 836 | 2pysB<br>(103) | 49-57 (9) | 49-54 (6) | 50-54 (5) | N | 0.89 | 0.73 | 98.02%<br>(99/101) | 93.07%<br>(94/101) | <br>Cyanovirin-N<br>Cyanovirin-N |
|     | 115eA<br>(101) | 49-57 (9) | 49-54 (6) | 50-54 (5) |   |      |      |                    |                    |                                                                                                                       |

|     |                |              |              |           |   |      |      |                     |                    |                                                                                                                         |
|-----|----------------|--------------|--------------|-----------|---|------|------|---------------------|--------------------|-------------------------------------------------------------------------------------------------------------------------|
| 837 | 2pysB<br>(103) | 49-53 (5)    | 49-53 (5)    | 50-53 (4) | N | 0.86 | 0.63 | 98.02%<br>(99/101)  | 93.07%<br>(94/101) | 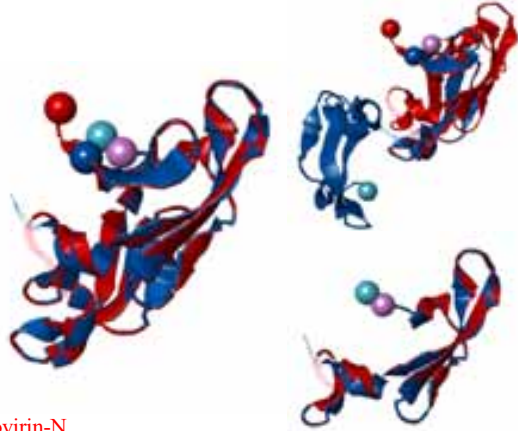<br>Cyanovirin-N<br>Cyanovirin-N      |
|     | 1lomA<br>(101) | 49-53 (5)    | 49-53 (5)    | 50-53 (4) |   |      |      |                     |                    |                                                                                                                         |
| 838 | 2vq8A<br>(128) | 21-25 (5)    | 24-25 (2)    | 23-25 (3) | N | 0.56 | 1.71 | 87.20%<br>(109/125) | 25.60%<br>(32/125) | <br>Rnase ZF-1A<br>Ribonuclease 1    |
|     | 1h8xA<br>(125) | 117-125 (9)  | 120-125 (6)  | 23-25 (3) |   |      |      |                     |                    |                                                                                                                         |
| 839 | 1pu3A<br>(105) | 8-19 (12)    | 13-19 (7)    | 16-19 (4) | N | 0.56 | 1.58 | 92.38%<br>(97/105)  | 21.90%<br>(23/105) | <br>P-30 protein<br>Ribonuclease 1 |
|     | 1h8xA<br>(125) | 109-125 (17) | 114-125 (12) | 16-19 (4) |   |      |      |                     |                    |                                                                                                                         |



|     |                |              |              |           |   |      |      |                     |                    |                                                                                                                                   |
|-----|----------------|--------------|--------------|-----------|---|------|------|---------------------|--------------------|-----------------------------------------------------------------------------------------------------------------------------------|
| 840 | 1un4A<br>(119) | 14-24 (11)   | 15-24 (10)   | 17-24 (8) | N | 0.65 | 1.48 | 92.44%<br>(110/119) | 34.45%<br>(41/119) | <br>Angiogenin<br>Ribonuclease 1               |
|     | 1h8xA<br>(125) | 113-124 (12) | 114-124 (11) | 17-24 (8) |   |      |      |                     |                    |                                                                                                                                   |
| 841 | 1mfA<br>(120)  | 16-24 (9)    | 16-23 (8)    | 16-23 (8) | N | 0.73 | 1.37 | 95.83%<br>(115/120) | 41.67%<br>(50/120) | <br>Protein (ribonuclease 4)<br>Ribonuclease 1 |
|     | 1h8xA<br>(125) | 116-125 (10) | 116-124 (9)  | 16-23 (8) |   |      |      |                     |                    |                                                                                                                                   |
| 842 | 2j4tA<br>(119) | 12-24 (13)   | 16-23 (8)    | 16-23 (8) | N | 0.68 | 1.56 | 94.96%<br>(113/119) | 36.13%<br>(43/119) | <br>Angiogenin-4<br>Ribonuclease 1           |
|     | 1h8xA<br>(125) | 112-125 (14) | 116-124 (9)  | 16-23 (8) |   |      |      |                     |                    |                                                                                                                                   |

|     |                |              |              |           |   |      |      |                     |                    |                                                                                                                                       |
|-----|----------------|--------------|--------------|-----------|---|------|------|---------------------|--------------------|---------------------------------------------------------------------------------------------------------------------------------------|
| 843 | 1b1eA<br>(123) | 13-24 (12)   | 17-24 (8)    | 17-24 (8) | N | 0.63 | 1.63 | 91.06%<br>(112/123) | 32.52%<br>(40/123) |  <p>Hydrolase angiogenin<br/>Ribonuclease 1</p>     |
|     | 1h8xA<br>(125) | 112-124 (13) | 116-124 (9)  | 17-24 (8) |   |      |      |                     |                    |                                                                                                                                       |
| 844 | 2hkyA<br>(129) | 11-22 (12)   | 11-22 (12)   | 16-22 (7) | N | 0.57 | 1.78 | 88.80%<br>(111/125) | 33.60%<br>(42/125) |  <p>Ribonuclease 7<br/>Ribonuclease 1</p>         |
|     | 1h8xA<br>(125) | 108-125 (18) | 108-125 (18) | 16-22 (7) |   |      |      |                     |                    |                                                                                                                                       |
| 845 | 1m58A<br>(106) | 12-19 (8)    | 12-19 (8)    | 15-19 (5) | N | 0.50 | 2.07 | 93.40%<br>(99/106)  | 23.58%<br>(25/106) |  <p>RC-mase2 ribonuclease<br/>Ribonuclease 1</p> |
|     | 1h8xA<br>(125) | 113-125 (13) | 113-125 (13) | 15-19 (5) |   |      |      |                     |                    |                                                                                                                                       |

|     |                |              |             |           |   |      |      |                     |                     |                                                                                                                                                                                                                          |
|-----|----------------|--------------|-------------|-----------|---|------|------|---------------------|---------------------|--------------------------------------------------------------------------------------------------------------------------------------------------------------------------------------------------------------------------|
| 846 | 2e0oB<br>(125) | 16-24 (9)    | 16-24 (9)   | 17-24 (8) | N | 0.85 | 0.95 | 96.80%<br>(121/125) | 86.40%<br>(108/125) | <br><br>Ribonuclease<br>Ribonuclease 1             |
|     | 1h8xA<br>(125) | 116-124 (9)  | 116-124 (9) | 17-24 (8) |   |      |      |                     |                     |                                                                                                                                                                                                                          |
| 847 | 1ymnA<br>(124) | 15-24 (10)   | 15-23 (9)   | 17-23 (7) | N | 0.84 | 1.13 | 98.39%<br>(122/124) | 69.35%<br>(86/124)  | <br><br>Ribonuclease pancreatic<br>Ribonuclease 1 |
|     | 1h8xA<br>(125) | 115-124 (10) | 115-123 (9) | 17-23 (7) |   |      |      |                     |                     |                                                                                                                                                                                                                          |
| 848 | 1a5pA<br>(124) | 15-24 (10)   | 15-23 (9)   | 17-23 (7) | N | 0.85 | 1.05 | 98.39%<br>(122/124) | 68.55%<br>(85/124)  | <br><br>Ribonuclease A<br>Ribonuclease 1       |
|     | 1h8xA<br>(125) | 115-124 (10) | 115-123 (9) | 17-23 (7) |   |      |      |                     |                     |                                                                                                                                                                                                                          |

|     |                |              |              |           |   |      |      |                     |                    |                                                                                                                                        |
|-----|----------------|--------------|--------------|-----------|---|------|------|---------------------|--------------------|----------------------------------------------------------------------------------------------------------------------------------------|
| 849 | 2bw1A<br>(118) | 13-24 (12)   | 15-24 (10)   | 17-24 (8) | N | 0.68 | 1.56 | 95.76%<br>(113/118) | 37.29%<br>(44/118) |  <p>Angiogenin<br/>Ribonuclease 1</p>                |
|     | 1h8xA<br>(125) | 112-124 (13) | 114-124 (11) | 17-24 (8) |   |      |      |                     |                    |                                                                                                                                        |
| 850 | 1gv7A<br>(123) | 12-24 (13)   | 17-24 (8)    | 17-24 (8) | N | 0.68 | 1.67 | 95.12%<br>(117/123) | 40.65%<br>(50/123) |  <p>Angiogenin<br/>Ribonuclease 1</p>               |
|     | 1h8xA<br>(125) | 111-124 (14) | 116-124 (9)  | 17-24 (8) |   |      |      |                     |                    |                                                                                                                                        |
| 851 | 1rraA<br>(124) | 16-23 (8)    | 17-23 (7)    | 17-23 (7) | N | 0.84 | 1.14 | 98.39%<br>(122/124) | 62.10%<br>(77/124) |  <p>Protein (ribonuclease)<br/>Ribonuclease 1</p> |
|     | 1h8xA<br>(125) | 116-123 (8)  | 117-123 (7)  | 17-23 (7) |   |      |      |                     |                    |                                                                                                                                        |

|     |                |              |              |           |   |      |      |                     |                     |                                                                                                                                                                             |
|-----|----------------|--------------|--------------|-----------|---|------|------|---------------------|---------------------|-----------------------------------------------------------------------------------------------------------------------------------------------------------------------------|
| 852 | 2q4gX<br>(126) | 15-25 (11)   | 15-24 (10)   | 17-23 (7) | N | 0.83 | 1.11 | 97.60%<br>(122/125) | 89.60%<br>(112/125) |       |
|     | 1h8xA<br>(125) | 115-125 (11) | 115-124 (10) | 17-23 (7) |   |      |      |                     |                     |                                                                                                                                                                             |
| 853 | 2k11A<br>(127) | 10-30 (21)   | 10-24 (15)   | 15-23 (9) | N | 0.73 | 1.58 | 97.60%<br>(122/125) | 89.60%<br>(112/125) |      |
|     | 1h8xA<br>(125) | 110-130 (21) | 110-124 (15) | 15-23 (9) |   |      |      |                     |                     |                                                                                                                                                                             |
| 854 | 2aasA<br>(124) | 12-25 (14)   | 12-25 (14)   | 20-25 (6) | N | 0.78 | 1.32 | 96.77%<br>(120/124) | 70.16%<br>(87/124)  |   |
|     | 1h8xA<br>(125) | 112-125 (14) | 112-125 (14) | 20-25 (6) |   |      |      |                     |                     |                                                                                                                                                                             |

|     |                |              |              |           |   |      |      |                     |                    |                                                                                                                                                                                                                         |
|-----|----------------|--------------|--------------|-----------|---|------|------|---------------------|--------------------|-------------------------------------------------------------------------------------------------------------------------------------------------------------------------------------------------------------------------|
| 855 | 2nuiA<br>(124) | 15-24 (10)   | 15-23 (9)    | 16-23 (8) | N | 0.86 | 1.04 | 98.39%<br>(122/124) | 68.55%<br>(85/124) |   <p>Ribonuclease pancreatic<br/>Ribonuclease 1</p> |
|     | 1h8xA<br>(125) | 115-124 (10) | 115-123 (9)  | 16-23 (8) |   |      |      |                     |                    |                                                                                                                                                                                                                         |
| 856 | 1qwqA<br>(124) | 12-24 (13)   | 12-24 (13)   | 19-24 (6) | N | 0.68 | 1.68 | 95.16%<br>(118/124) | 70.97%<br>(88/124) |   <p>Ribonuclease<br/>Ribonuclease 1</p>          |
|     | 1h8xA<br>(125) | 112-124 (13) | 112-124 (13) | 19-24 (6) |   |      |      |                     |                    |                                                                                                                                                                                                                         |
| 857 | lizpA<br>(124) | 15-23 (9)    | 15-23 (9)    | 20-23 (4) | N | 0.86 | 0.95 | 97.58%<br>(121/124) | 68.55%<br>(85/124) |   <p>Ribonuclease A<br/>Ribonuclease 1</p>    |
|     | 1h8xA<br>(125) | 115-123 (9)  | 115-123 (9)  | 20-23 (4) |   |      |      |                     |                    |                                                                                                                                                                                                                         |

|     |                |            |            |           |   |      |      |                     |                    |                                                                                                                                                 |
|-----|----------------|------------|------------|-----------|---|------|------|---------------------|--------------------|-------------------------------------------------------------------------------------------------------------------------------------------------|
| 858 | 2vq8A<br>(128) | 17-25 (9)  | 19-25 (7)  | 19-25 (7) | N | 0.39 | 1.67 | 87.10%<br>(108/124) | 22.58%<br>(28/124) |  <p>Rnase ZF-1A<br/>Protein (bovine seminal ribonuclease)</p> |
|     | 11bgA<br>(124) | 13-25 (13) | 15-25 (11) | 19-25 (7) |   |      |      |                     |                    |                                                                                                                                                 |
| 859 | 2vq8A<br>(128) | 19-25 (7)  | 19-25 (7)  | 23-25 (3) | N | 0.34 | 1.69 | 87.90%<br>(109/124) | 23.39%<br>(29/124) |  <p>Rnase ZF-1A<br/>Seminal ribonuclease</p>                |
|     | 1y92B<br>(124) | 15-25 (11) | 15-25 (11) | 23-25 (3) |   |      |      |                     |                    |                                                                                                                                                 |
| 860 | 2vq8A<br>(128) | 19-25 (7)  | 19-25 (7)  | 19-25 (7) | N | 0.38 | 1.78 | 87.90%<br>(109/124) | 22.58%<br>(28/124) |  <p>Rnase ZF-1A<br/>Seminal ribonuclease</p>               |
|     | 3bcoA<br>(124) | 15-25 (11) | 15-25 (11) | 19-25 (7) |   |      |      |                     |                    |                                                                                                                                                 |

|     |                |            |            |           |   |      |      |                     |                    |                                                                                                                                                                                                                              |
|-----|----------------|------------|------------|-----------|---|------|------|---------------------|--------------------|------------------------------------------------------------------------------------------------------------------------------------------------------------------------------------------------------------------------------|
| 861 | 2vq8A<br>(128) | 17-25 (9)  | 19-25 (7)  | 19-25 (7) | N | 0.36 | 1.76 | 87.90%<br>(109/124) | 22.58%<br>(28/124) |  <br>Rnase ZF-1A<br>Seminal ribonuclease               |
|     | 1y94A<br>(124) | 13-25 (13) | 15-25 (11) | 19-25 (7) |   |      |      |                     |                    |                                                                                                                                                                                                                              |
| 862 | 1kvzA<br>(107) | 13-42 (30) | 13-22 (10) | 14-20 (7) | N | 0.35 | 2.11 | 92.52%<br>(99/107)  | 24.30%<br>(26/107) |  <br>RC-mase4<br>Protein (bovine seminal ribonuclease) |
|     | 11bgA<br>(124) | 14-51 (38) | 14-28 (15) | 14-20 (7) |   |      |      |                     |                    |                                                                                                                                                                                                                              |
| 863 | 1kvzA<br>(107) | 9-42 (34)  | 11-22 (12) | 13-20 (8) | N | 0.30 | 2.04 | 91.59%<br>(98/107)  | 23.36%<br>(25/107) |  <br>RC-mase4<br>Seminal ribonuclease              |
|     | 1y92B<br>(124) | 9-51 (43)  | 11-28 (18) | 13-20 (8) |   |      |      |                     |                    |                                                                                                                                                                                                                              |



|     |                |            |            |           |   |      |      |                     |                    |                                                                                                                                                |
|-----|----------------|------------|------------|-----------|---|------|------|---------------------|--------------------|------------------------------------------------------------------------------------------------------------------------------------------------|
| 864 | 1kvzA<br>(107) | 13-43 (31) | 13-22 (10) | 14-20 (7) | N | 0.37 | 2.10 | 92.52%<br>(99/107)  | 24.30%<br>(26/107) | <br>RC-mase4<br>Seminal ribonuclease                         |
|     | 3bcoA<br>(124) | 14-52 (39) | 14-28 (15) | 14-20 (7) |   |      |      |                     |                    |                                                                                                                                                |
| 865 | 1kvzA<br>(107) | 13-42 (30) | 13-20 (8)  | 14-20 (7) | N | 0.35 | 2.15 | 93.46%<br>(100/107) | 24.30%<br>(26/107) | <br>RC-mase4<br>Seminal ribonuclease                       |
|     | 1y94A<br>(124) | 14-51 (38) | 14-26 (13) | 14-20 (7) |   |      |      |                     |                    |                                                                                                                                                |
| 866 | 1pu3A<br>(105) | 12-19 (8)  | 13-19 (7)  | 13-19 (7) | N | 0.37 | 1.82 | 93.33%<br>(98/105)  | 23.81%<br>(25/105) | <br>P-30 protein<br>Protein (bovine seminal ribonuclease) |
|     | 11bgA<br>(124) | 13-25 (13) | 14-25 (12) | 13-19 (7) |   |      |      |                     |                    |                                                                                                                                                |

|     |                |           |            |           |   |      |      |                    |                    |                                                                                                                                    |
|-----|----------------|-----------|------------|-----------|---|------|------|--------------------|--------------------|------------------------------------------------------------------------------------------------------------------------------------|
| 867 | 1pu3A<br>(105) | 8-19 (12) | 13-19 (7)  | 13-19 (7) | N | 0.35 | 1.77 | 93.33%<br>(98/105) | 23.81%<br>(25/105) |  <p>P-30 protein<br/>Seminal ribonuclease</p>    |
|     | 1y92B<br>(124) | 9-25 (17) | 14-25 (12) | 13-19 (7) |   |      |      |                    |                    |                                                                                                                                    |
| 868 | 1pu3A<br>(105) | 8-21 (14) | 13-19 (7)  | 13-19 (7) | N | 0.36 | 1.68 | 92.38%<br>(97/105) | 23.81%<br>(25/105) |  <p>P-30 protein<br/>Seminal ribonuclease</p>  |
|     | 3bcoA<br>(124) | 9-27 (19) | 14-25 (12) | 13-19 (7) |   |      |      |                    |                    |                                                                                                                                    |
| 869 | 1pu3A<br>(105) | 8-21 (14) | 13-19 (7)  | 13-19 (7) | N | 0.36 | 1.63 | 92.38%<br>(97/105) | 23.81%<br>(25/105) |  <p>P-30 protein<br/>Seminal ribonuclease</p> |
|     | 1y94A<br>(124) | 9-27 (19) | 14-25 (12) | 13-19 (7) |   |      |      |                    |                    |                                                                                                                                    |

|     |                |            |            |           |   |      |      |                     |                    |                                                                                                                                                 |
|-----|----------------|------------|------------|-----------|---|------|------|---------------------|--------------------|-------------------------------------------------------------------------------------------------------------------------------------------------|
| 870 | 1un4A<br>(119) | 14-24 (11) | 15-24 (10) | 16-22 (7) | N | 0.52 | 1.37 | 93.28%<br>(111/119) | 32.77%<br>(39/119) |  <p>Angiogenin<br/>Protein (bovine seminal ribonuclease)</p> |
|     | 1lbgA<br>(124) | 13-24 (12) | 14-24 (11) | 16-22 (7) |   |      |      |                     |                    |                                                                                                                                                 |
| 871 | 1un4A<br>(119) | 15-24 (10) | 16-24 (9)  | 19-22 (4) | N | 0.50 | 1.35 | 93.28%<br>(111/119) | 30.25%<br>(36/119) |  <p>Angiogenin<br/>Seminal ribonuclease</p>                 |
|     | 1y92B<br>(124) | 14-24 (11) | 15-24 (10) | 19-22 (4) |   |      |      |                     |                    |                                                                                                                                                 |
| 872 | 1un4A<br>(119) | 15-24 (10) | 15-24 (10) | 16-22 (7) | N | 0.49 | 1.50 | 94.12%<br>(112/119) | 31.93%<br>(38/119) |  <p>Angiogenin<br/>Seminal ribonuclease</p>                |
|     | 3bcoA<br>(124) | 14-24 (11) | 14-24 (11) | 16-22 (7) |   |      |      |                     |                    |                                                                                                                                                 |

|     |                |            |            |           |   |      |      |                     |                    |                                                                                                                                                                |
|-----|----------------|------------|------------|-----------|---|------|------|---------------------|--------------------|----------------------------------------------------------------------------------------------------------------------------------------------------------------|
| 873 | 1un4A<br>(119) | 14-24 (11) | 15-24 (10) | 16-22 (7) | N | 0.48 | 1.47 | 93.28%<br>(111/119) | 31.09%<br>(37/119) |  <p>Angiogenin<br/>Seminal ribonuclease</p>                                 |
|     | 1y94A<br>(124) | 13-24 (12) | 14-24 (11) | 16-22 (7) |   |      |      |                     |                    |                                                                                                                                                                |
| 874 | 1mfA<br>(120)  | 15-24 (10) | 15-23 (9)  | 18-22 (5) | N | 0.51 | 1.41 | 97.50%<br>(117/120) | 43.33%<br>(52/120) |  <p>Protein (ribonuclease 4)<br/>Protein (bovine seminal ribonuclease)</p> |
|     | 11bgA<br>(124) | 15-25 (11) | 15-24 (10) | 18-22 (5) |   |      |      |                     |                    |                                                                                                                                                                |
| 875 | 1mfA<br>(120)  | 15-24 (10) | 17-23 (7)  | 18-23 (6) | N | 0.56 | 1.20 | 96.67%<br>(116/120) | 42.50%<br>(51/120) |  <p>Protein (ribonuclease 4)<br/>Seminal ribonuclease</p>                 |
|     | 1y92B<br>(124) | 15-25 (11) | 17-24 (8)  | 18-23 (6) |   |      |      |                     |                    |                                                                                                                                                                |

|     |                |            |            |           |   |      |      |                     |                    |                                                                                                                                                                             |
|-----|----------------|------------|------------|-----------|---|------|------|---------------------|--------------------|-----------------------------------------------------------------------------------------------------------------------------------------------------------------------------|
| 876 | 1mfA<br>(120)  | 15-24 (10) | 15-23 (9)  | 15-22 (8) | N | 0.51 | 1.40 | 97.50%<br>(117/120) | 41.67%<br>(50/120) |       |
|     | 3bcoA<br>(124) | 15-25 (11) | 15-24 (10) | 15-22 (8) |   |      |      |                     |                    |                                                                                                                                                                             |
| 877 | 1mfA<br>(120)  | 15-24 (10) | 15-23 (9)  | 18-22 (5) | N | 0.46 | 1.41 | 97.50%<br>(117/120) | 42.50%<br>(51/120) |      |
|     | 1y94A<br>(124) | 15-25 (11) | 15-24 (10) | 18-22 (5) |   |      |      |                     |                    |                                                                                                                                                                             |
| 878 | 2j4tA<br>(119) | 12-24 (13) | 15-23 (9)  | 15-21 (7) | N | 0.52 | 1.29 | 94.12%<br>(112/119) | 34.45%<br>(41/119) |   |
|     | 11bgA<br>(124) | 12-25 (14) | 15-24 (10) | 15-21 (7) |   |      |      |                     |                    |                                                                                                                                                                             |

|     |                |            |            |           |   |      |      |                     |                    |                                                                                                                                    |
|-----|----------------|------------|------------|-----------|---|------|------|---------------------|--------------------|------------------------------------------------------------------------------------------------------------------------------------|
| 879 | 2j4tA<br>(119) | 13-24 (12) | 15-23 (9)  | 18-21 (4) | N | 0.51 | 1.40 | 94.96%<br>(113/119) | 33.61%<br>(40/119) |  <p>Angiogenin-4<br/>Seminal ribonuclease</p>   |
|     | 1y92B<br>(124) | 13-25 (13) | 15-24 (10) | 18-21 (4) |   |      |      |                     |                    |                                                                                                                                    |
| 880 | 2j4tA<br>(119) | 12-24 (13) | 15-23 (9)  | 15-21 (7) | N | 0.50 | 1.43 | 94.96%<br>(113/119) | 33.61%<br>(40/119) |  <p>Angiogenin-4<br/>Seminal ribonuclease</p>  |
|     | 3bcoA<br>(124) | 12-25 (14) | 15-24 (10) | 15-21 (7) |   |      |      |                     |                    |                                                                                                                                    |
| 881 | 2j4tA<br>(119) | 13-23 (12) | 14-23 (10) | 15-21 (7) | N | 0.49 | 1.34 | 94.12%<br>(112/119) | 33.61%<br>(40/119) |  <p>Angiogenin-4<br/>Seminal ribonuclease</p> |
|     | 1y94A<br>(124) | 12-24 (13) | 14-24 (11) | 15-21 (7) |   |      |      |                     |                    |                                                                                                                                    |

|     |                |            |            |           |   |      |      |                     |                    |                                                                                       |
|-----|----------------|------------|------------|-----------|---|------|------|---------------------|--------------------|---------------------------------------------------------------------------------------|
| 882 | 1b1eA<br>(123) | 14-24 (11) | 15-24 (10) | 16-22 (7) | N | 0.48 | 1.34 | 90.24%<br>(111/123) | 30.89%<br>(38/123) |    |
|     | 11bgA<br>(124) | 13-24 (12) | 14-24 (11) | 16-22 (7) |   |      |      |                     |                    |                                                                                       |
| 883 | 1b1eA<br>(123) | 14-24 (11) | 16-24 (9)  | 19-22 (4) | N | 0.48 | 1.46 | 91.06%<br>(112/123) | 28.46%<br>(35/123) |    |
|     | 1y92B<br>(124) | 13-24 (12) | 15-24 (10) | 19-22 (4) |   |      |      |                     |                    |                                                                                       |
| 884 | 1b1eA<br>(123) | 14-25 (12) | 15-24 (10) | 16-22 (7) | N | 0.45 | 1.39 | 90.24%<br>(111/123) | 28.46%<br>(35/123) |  |
|     | 3bcoA<br>(124) | 13-25 (13) | 14-24 (11) | 16-22 (7) |   |      |      |                     |                    |                                                                                       |

|     |                |            |            |           |   |      |      |                     |                    |                                                                                                                                                     |
|-----|----------------|------------|------------|-----------|---|------|------|---------------------|--------------------|-----------------------------------------------------------------------------------------------------------------------------------------------------|
| 885 | 1b1eA<br>(123) | 13-24 (12) | 15-24 (10) | 16-23 (8) | N | 0.44 | 1.37 | 89.43%<br>(110/123) | 28.46%<br>(35/123) |  <p>Hydrolase angiogenin<br/>Seminal ribonuclease</p>            |
|     | 1y94A<br>(124) | 12-24 (13) | 14-24 (11) | 16-23 (8) |   |      |      |                     |                    |                                                                                                                                                     |
| 886 | 2hkyA<br>(129) | 11-22 (12) | 11-22 (12) | 16-22 (7) | N | 0.33 | 1.91 | 91.13%<br>(113/124) | 35.48%<br>(44/124) |  <p>Ribonuclease 7<br/>Protein (bovine seminal ribonuclease)</p> |
|     | 11bgA<br>(124) | 8-25 (18)  | 8-25 (18)  | 16-22 (7) |   |      |      |                     |                    |                                                                                                                                                     |
| 887 | 2hkyA<br>(129) | 11-22 (12) | 15-22 (8)  | 17-22 (6) | N | 0.31 | 1.68 | 91.13%<br>(113/124) | 35.48%<br>(44/124) |  <p>Ribonuclease 7<br/>Seminal ribonuclease</p>                |
|     | 1y92B<br>(124) | 8-25 (18)  | 12-25 (14) | 17-22 (6) |   |      |      |                     |                    |                                                                                                                                                     |



|     |                |            |            |           |   |      |      |                     |                    |                                                                                                                                                                             |
|-----|----------------|------------|------------|-----------|---|------|------|---------------------|--------------------|-----------------------------------------------------------------------------------------------------------------------------------------------------------------------------|
| 888 | 2hkyA<br>(129) | 11-22 (12) | 11-22 (12) | 17-22 (6) | N | 0.28 | 1.86 | 91.13%<br>(113/124) | 35.48%<br>(44/124) |       |
|     | 3bcoA<br>(124) | 8-25 (18)  | 8-25 (18)  | 17-22 (6) |   |      |      |                     |                    |                                                                                                                                                                             |
| 889 | 2hkyA<br>(129) | 11-22 (12) | 11-22 (12) | 16-22 (7) | N | 0.31 | 1.82 | 91.13%<br>(113/124) | 36.29%<br>(45/124) |      |
|     | 1y94A<br>(124) | 8-25 (18)  | 8-25 (18)  | 16-22 (7) |   |      |      |                     |                    |                                                                                                                                                                             |
| 890 | 1m58A<br>(106) | 12-19 (8)  | 12-19 (8)  | 17-19 (3) | N | 0.37 | 1.97 | 91.51%<br>(97/106)  | 23.58%<br>(25/106) |   |
|     | 11bgA<br>(124) | 13-25 (13) | 13-25 (13) | 17-19 (3) |   |      |      |                     |                    |                                                                                                                                                                             |

|     |                |            |            |           |   |      |      |                    |                    |                                                                                       |
|-----|----------------|------------|------------|-----------|---|------|------|--------------------|--------------------|---------------------------------------------------------------------------------------|
| 891 | 1m58A<br>(106) | 12-19 (8)  | 12-19 (8)  | 13-19 (7) | N | 0.37 | 2.06 | 93.40%<br>(99/106) | 23.58%<br>(25/106) |    |
|     | 1y92B<br>(124) | 13-25 (13) | 13-25 (13) | 13-19 (7) |   |      |      |                    |                    |                                                                                       |
| 892 | 1m58A<br>(106) | 12-19 (8)  | 12-19 (8)  | 18-19 (2) | N | 0.34 | 2.08 | 92.45%<br>(98/106) | 23.58%<br>(25/106) |   |
|     | 3bcoA<br>(124) | 13-25 (13) | 13-25 (13) | 18-19 (2) |   |      |      |                    |                    |                                                                                       |
| 893 | 1m58A<br>(106) | 12-19 (8)  | 12-19 (8)  | 13-19 (7) | N | 0.36 | 2.02 | 92.45%<br>(98/106) | 23.58%<br>(25/106) |  |
|     | 1y94A<br>(124) | 13-25 (13) | 13-25 (13) | 13-19 (7) |   |      |      |                    |                    |                                                                                       |

|     |                |            |            |           |   |      |      |                      |                    |                                                                                                                                                                             |
|-----|----------------|------------|------------|-----------|---|------|------|----------------------|--------------------|-----------------------------------------------------------------------------------------------------------------------------------------------------------------------------|
| 894 | 2e0oB<br>(125) | 15-24 (10) | 15-24 (10) | 17-23 (7) | N | 0.57 | 1.01 | 99.19%<br>(123/124)  | 69.35%<br>(86/124) |       |
|     | 11bgA<br>(124) | 15-24 (10) | 15-24 (10) | 17-23 (7) |   |      |      |                      |                    |                                                                                                                                                                             |
| 895 | 2e0oB<br>(125) | 15-24 (10) | 15-24 (10) | 18-23 (6) | N | 0.58 | 0.89 | 100.00%<br>(124/124) | 70.16%<br>(87/124) |       |
|     | 1y92B<br>(124) | 15-24 (10) | 15-24 (10) | 18-23 (6) |   |      |      |                      |                    |                                                                                                                                                                             |
| 896 | 2e0oB<br>(125) | 15-24 (10) | 15-24 (10) | 18-23 (6) | N | 0.51 | 0.93 | 99.19%<br>(123/124)  | 69.35%<br>(86/124) |   |
|     | 3bc0A<br>(124) | 15-24 (10) | 15-24 (10) | 18-23 (6) |   |      |      |                      |                    |                                                                                                                                                                             |

|     |                |            |           |           |   |      |      |                      |                     |                                                                                                                                                               |
|-----|----------------|------------|-----------|-----------|---|------|------|----------------------|---------------------|---------------------------------------------------------------------------------------------------------------------------------------------------------------|
| 897 | 2e0oB<br>(125) | 15-25 (11) | 20-24 (5) | 15-23 (9) | N | 0.49 | 0.98 | 99.19%<br>(123/124)  | 68.55%<br>(85/124)  |  <p>Ribonuclease<br/>Seminal ribonuclease</p>                              |
|     | 1y94A<br>(124) | 15-25 (11) | 20-24 (5) | 15-23 (9) |   |      |      |                      |                     |                                                                                                                                                               |
| 898 | 1ymnA<br>(124) | 15-22 (8)  | 15-22 (8) | 15-22 (8) | N | 0.55 | 1.10 | 100.00%<br>(124/124) | 80.65%<br>(100/124) |  <p>Ribonuclease pancreatic<br/>Protein (bovine seminal ribonuclease)</p> |
|     | 11bgA<br>(124) | 15-22 (8)  | 15-22 (8) | 15-22 (8) |   |      |      |                      |                     |                                                                                                                                                               |
| 899 | 1ymnA<br>(124) | 15-23 (9)  | 15-23 (9) | 17-22 (6) | N | 0.65 | 0.99 | 100.00%<br>(124/124) | 80.65%<br>(100/124) |  <p>Ribonuclease pancreatic<br/>Seminal ribonuclease</p>                 |
|     | 1y92B<br>(124) | 15-23 (9)  | 15-23 (9) | 17-22 (6) |   |      |      |                      |                     |                                                                                                                                                               |

|     |                |           |           |           |   |      |      |                      |                     |                                                                                                                                                       |
|-----|----------------|-----------|-----------|-----------|---|------|------|----------------------|---------------------|-------------------------------------------------------------------------------------------------------------------------------------------------------|
| 900 | 1ymnA<br>(124) | 15-22 (8) | 15-22 (8) | 15-22 (8) | N | 0.55 | 1.09 | 100.00%<br>(124/124) | 81.45%<br>(101/124) |  <p>Ribonuclease pancreatic<br/>Seminal ribonuclease</p>            |
|     | 3bcoA<br>(124) | 15-22 (8) | 15-22 (8) | 15-22 (8) |   |      |      |                      |                     |                                                                                                                                                       |
| 901 | 1ymnA<br>(124) | 15-22 (8) | 15-22 (8) | 15-22 (8) | N | 0.51 | 1.15 | 100.00%<br>(124/124) | 83.06%<br>(103/124) |  <p>Ribonuclease pancreatic<br/>Seminal ribonuclease</p>          |
|     | 1y94A<br>(124) | 15-22 (8) | 15-22 (8) | 15-22 (8) |   |      |      |                      |                     |                                                                                                                                                       |
| 902 | 1a5pA<br>(124) | 15-22 (8) | 15-22 (8) | 15-22 (8) | N | 0.55 | 0.91 | 100.00%<br>(124/124) | 79.84%<br>(99/124)  |  <p>Ribonuclease A<br/>Protein (bovine seminal ribonuclease)</p> |
|     | 11bgA<br>(124) | 15-22 (8) | 15-22 (8) | 15-22 (8) |   |      |      |                      |                     |                                                                                                                                                       |

|     |                |           |           |           |   |      |      |                      |                     |                                                                                                                                      |
|-----|----------------|-----------|-----------|-----------|---|------|------|----------------------|---------------------|--------------------------------------------------------------------------------------------------------------------------------------|
| 903 | 1a5pA<br>(124) | 15-23 (9) | 21-23 (3) | 17-22 (6) | N | 0.65 | 0.89 | 100.00%<br>(124/124) | 79.84%<br>(99/124)  |  <p>Ribonuclease A<br/>Seminal ribonuclease</p>   |
|     | 1y92B<br>(124) | 15-23 (9) | 21-23 (3) | 17-22 (6) |   |      |      |                      |                     |                                                                                                                                      |
| 904 | 1a5pA<br>(124) | 15-22 (8) | 15-22 (8) | 15-22 (8) | N | 0.57 | 0.89 | 100.00%<br>(124/124) | 80.65%<br>(100/124) |  <p>Ribonuclease A<br/>Seminal ribonuclease</p>  |
|     | 3bcoA<br>(124) | 15-22 (8) | 15-22 (8) | 15-22 (8) |   |      |      |                      |                     |                                                                                                                                      |
| 905 | 1a5pA<br>(124) | 15-22 (8) | 15-22 (8) | 15-22 (8) | N | 0.55 | 0.97 | 100.00%<br>(124/124) | 82.26%<br>(102/124) |  <p>Ribonuclease A<br/>Seminal ribonuclease</p> |
|     | 1y94A<br>(124) | 15-22 (8) | 15-22 (8) | 15-22 (8) |   |      |      |                      |                     |                                                                                                                                      |

|     |                |           |            |           |   |      |      |                    |                    |                                                                                                                                                                             |
|-----|----------------|-----------|------------|-----------|---|------|------|--------------------|--------------------|-----------------------------------------------------------------------------------------------------------------------------------------------------------------------------|
| 906 | 1z5fA<br>(105) | 1-32 (32) | 10-18 (9)  | 17-18 (2) | N | 0.30 | 2.32 | 91.43%<br>(96/105) | 21.90%<br>(23/105) |       |
|     | 11bgA<br>(124) | 1-42 (42) | 12-25 (14) | 17-18 (2) |   |      |      |                    |                    |                                                                                                                                                                             |
| 907 | 1z5fA<br>(105) | 2-32 (31) | 11-18 (8)  | 11-18 (8) | N | 0.39 | 2.27 | 91.43%<br>(96/105) | 20.95%<br>(22/105) |       |
|     | 1y92B<br>(124) | 3-42 (40) | 12-25 (14) | 11-18 (8) |   |      |      |                    |                    |                                                                                                                                                                             |
| 908 | 1z5fA<br>(105) | 2-32 (31) | 11-18 (8)  | 12-18 (7) | N | 0.34 | 2.47 | 92.38%<br>(97/105) | 20.00%<br>(21/105) |   |
|     | 3bcoA<br>(124) | 3-42 (40) | 12-25 (14) | 12-18 (7) |   |      |      |                    |                    |                                                                                                                                                                             |

|     |                |            |            |           |   |      |      |                     |                    |                                                                                                                                                |
|-----|----------------|------------|------------|-----------|---|------|------|---------------------|--------------------|------------------------------------------------------------------------------------------------------------------------------------------------|
| 909 | 2bw1A<br>(118) | 15-24 (10) | 15-24 (10) | 16-23 (8) | N | 0.42 | 1.46 | 95.76%<br>(113/118) | 35.59%<br>(42/118) |  <p>Angiogenin<br/>Protein (bovine seminal ribonuclease)</p> |
|     | 11bgA<br>(124) | 14-24 (11) | 14-24 (11) | 16-23 (8) |   |      |      |                     |                    |                                                                                                                                                |
| 910 | 2bw1A<br>(118) | 15-24 (10) | 17-24 (8)  | 18-24 (7) | N | 0.45 | 1.59 | 96.61%<br>(114/118) | 34.75%<br>(41/118) |  <p>Angiogenin<br/>Seminal ribonuclease</p>                |
|     | 1y92B<br>(124) | 14-24 (11) | 16-24 (9)  | 18-24 (7) |   |      |      |                     |                    |                                                                                                                                                |
| 911 | 2bw1A<br>(118) | 15-24 (10) | 15-24 (10) | 16-23 (8) | N | 0.39 | 1.54 | 95.76%<br>(113/118) | 35.59%<br>(42/118) |  <p>Angiogenin<br/>Seminal ribonuclease</p>               |
|     | 3bcoA<br>(124) | 14-24 (11) | 14-24 (11) | 16-23 (8) |   |      |      |                     |                    |                                                                                                                                                |



|     |                |            |            |           |   |      |      |                     |                    |                                                                                                                                                                                                                                 |
|-----|----------------|------------|------------|-----------|---|------|------|---------------------|--------------------|---------------------------------------------------------------------------------------------------------------------------------------------------------------------------------------------------------------------------------|
| 912 | 2bw1A<br>(118) | 15-24 (10) | 15-24 (10) | 16-23 (8) | N | 0.45 | 1.42 | 94.92%<br>(112/118) | 33.90%<br>(40/118) |  <br>Angiogenin<br>Seminal ribonuclease                     |
|     | 1y94A<br>(124) | 14-24 (11) | 14-24 (11) | 16-23 (8) |   |      |      |                     |                    |                                                                                                                                                                                                                                 |
| 913 | 1gv7A<br>(123) | 12-24 (13) | 16-24 (9)  | 16-22 (7) | N | 0.46 | 1.42 | 95.12%<br>(117/123) | 40.65%<br>(50/123) |  <br>Angiogenin<br>Protein (bovine seminal ribonuclease) |
|     | 11bgA<br>(124) | 11-24 (14) | 15-24 (10) | 16-22 (7) |   |      |      |                     |                    |                                                                                                                                                                                                                                 |
| 914 | 1gv7A<br>(123) | 12-24 (13) | 16-24 (9)  | 18-24 (7) | N | 0.52 | 1.28 | 93.50%<br>(115/123) | 39.02%<br>(48/123) |  <br>Angiogenin<br>Seminal ribonuclease               |
|     | 1y92B<br>(124) | 11-24 (14) | 15-24 (10) | 18-24 (7) |   |      |      |                     |                    |                                                                                                                                                                                                                                 |

|     |                |            |            |           |   |      |      |                      |                    |                                                                                                                                                                                                                                                   |
|-----|----------------|------------|------------|-----------|---|------|------|----------------------|--------------------|---------------------------------------------------------------------------------------------------------------------------------------------------------------------------------------------------------------------------------------------------|
| 915 | 1gv7A<br>(123) | 11-25 (15) | 16-24 (9)  | 16-23 (8) | N | 0.47 | 1.36 | 93.50%<br>(115/123)  | 39.84%<br>(49/123) | <br><br>Angiogenin<br>Seminal ribonuclease                                  |
|     | 3bcoA<br>(124) | 10-25 (16) | 15-24 (10) | 16-23 (8) |   |      |      |                      |                    |                                                                                                                                                                                                                                                   |
| 916 | 1gv7A<br>(123) | 11-24 (14) | 15-24 (10) | 16-23 (8) | N | 0.47 | 1.36 | 93.50%<br>(115/123)  | 39.84%<br>(49/123) | <br><br>Angiogenin<br>Seminal ribonuclease                                 |
|     | 1y94A<br>(124) | 10-24 (15) | 14-24 (11) | 16-23 (8) |   |      |      |                      |                    |                                                                                                                                                                                                                                                   |
| 917 | 1rraA<br>(124) | 15-24 (10) | 15-22 (8)  | 15-22 (8) | N | 0.54 | 1.18 | 100.00%<br>(124/124) | 66.13%<br>(82/124) | <br><br>Protein (ribonuclease)<br>Protein (bovine seminal ribonuclease) |
|     | 11bgA<br>(124) | 15-24 (10) | 15-22 (8)  | 15-22 (8) |   |      |      |                      |                    |                                                                                                                                                                                                                                                   |

|     |                |           |           |           |   |      |      |                      |                    |                                                                                                                                              |
|-----|----------------|-----------|-----------|-----------|---|------|------|----------------------|--------------------|----------------------------------------------------------------------------------------------------------------------------------------------|
| 918 | IrraA<br>(124) | 20-23 (4) | 20-23 (4) | 21-22 (2) | N | 0.55 | 0.76 | 100.00%<br>(124/124) | 65.32%<br>(81/124) |  <p>Protein (ribonuclease)<br/>Seminal ribonuclease</p>   |
|     | 1y92B<br>(124) | 20-23 (4) | 20-23 (4) | 21-22 (2) |   |      |      |                      |                    |                                                                                                                                              |
| 919 | IrraA<br>(124) | 15-22 (8) | 15-22 (8) | 15-22 (8) | N | 0.54 | 1.13 | 100.00%<br>(124/124) | 66.13%<br>(82/124) |  <p>Protein (ribonuclease)<br/>Seminal ribonuclease</p>  |
|     | 3bcoA<br>(124) | 15-22 (8) | 15-22 (8) | 15-22 (8) |   |      |      |                      |                    |                                                                                                                                              |
| 920 | IrraA<br>(124) | 15-22 (8) | 15-22 (8) | 15-22 (8) | N | 0.53 | 1.16 | 100.00%<br>(124/124) | 65.32%<br>(81/124) |  <p>Protein (ribonuclease)<br/>Seminal ribonuclease</p> |
|     | 1y94A<br>(124) | 15-22 (8) | 15-22 (8) | 15-22 (8) |   |      |      |                      |                    |                                                                                                                                              |

|     |                |            |           |           |   |      |      |                     |                    |                                                                                                                                                                             |
|-----|----------------|------------|-----------|-----------|---|------|------|---------------------|--------------------|-----------------------------------------------------------------------------------------------------------------------------------------------------------------------------|
| 921 | 2q4gX<br>(126) | 15-25 (11) | 15-22 (8) | 15-22 (8) | N | 0.52 | 0.85 | 98.39%<br>(122/124) | 69.35%<br>(86/124) |       |
|     | 11bgA<br>(124) | 15-25 (11) | 15-22 (8) | 15-22 (8) |   |      |      |                     |                    |                                                                                                                                                                             |
| 922 | 2q4gX<br>(126) | 14-25 (12) | 19-24 (6) | 20-22 (3) | N | 0.59 | 0.75 | 99.19%<br>(123/124) | 70.16%<br>(87/124) |       |
|     | 1y92B<br>(124) | 14-25 (12) | 19-24 (6) | 20-22 (3) |   |      |      |                     |                    |                                                                                                                                                                             |
| 923 | 2q4gX<br>(126) | 15-24 (10) | 15-22 (8) | 15-22 (8) | N | 0.53 | 0.95 | 99.19%<br>(123/124) | 70.97%<br>(88/124) |   |
|     | 3bcoA<br>(124) | 15-24 (10) | 15-22 (8) | 15-22 (8) |   |      |      |                     |                    |                                                                                                                                                                             |

|     |                |            |            |            |   |      |      |                      |                    |                                                                                       |
|-----|----------------|------------|------------|------------|---|------|------|----------------------|--------------------|---------------------------------------------------------------------------------------|
| 924 | 2q4gX<br>(126) | 15-25 (11) | 15-22 (8)  | 15-22 (8)  | N | 0.49 | 1.03 | 99.19%<br>(123/124)  | 69.35%<br>(86/124) |     |
|     | 1y94A<br>(124) | 15-25 (11) | 15-22 (8)  | 15-22 (8)  |   |      |      |                      |                    |                                                                                       |
| 925 | 2k11A<br>(127) | 10-32 (23) | 10-24 (15) | 14-24 (11) | N | 0.53 | 1.31 | 97.58%<br>(121/124)  | 67.74%<br>(84/124) |    |
|     | 11bgA<br>(124) | 10-32 (23) | 10-24 (15) | 14-24 (11) |   |      |      |                      |                    |                                                                                       |
| 926 | 2k11A<br>(127) | 10-32 (23) | 19-24 (6)  | 19-23 (5)  | N | 0.45 | 1.43 | 100.00%<br>(124/124) | 70.97%<br>(88/124) |  |
|     | 1y92B<br>(124) | 10-32 (23) | 19-24 (6)  | 19-23 (5)  |   |      |      |                      |                    |                                                                                       |

|     |                |            |            |            |   |      |      |                      |                     |                                                                                                                                                  |
|-----|----------------|------------|------------|------------|---|------|------|----------------------|---------------------|--------------------------------------------------------------------------------------------------------------------------------------------------|
| 927 | 2k11A<br>(127) | 10-24 (15) | 10-24 (15) | 14-24 (11) | N | 0.48 | 1.31 | 97.58%<br>(121/124)  | 68.55%<br>(85/124)  | 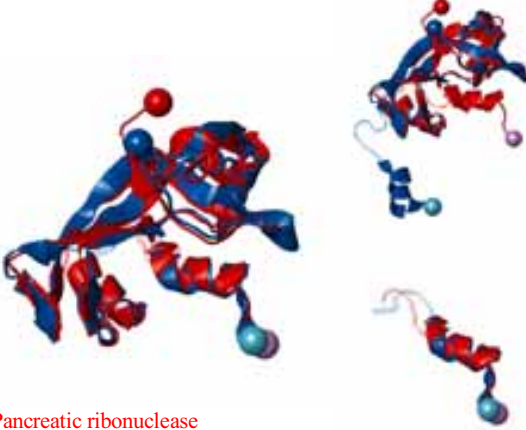<br>Pancreatic ribonuclease<br>Seminal ribonuclease            |
|     | 3bcoA<br>(124) | 10-24 (15) | 10-24 (15) | 14-24 (11) |   |      |      |                      |                     |                                                                                                                                                  |
| 928 | 2k11A<br>(127) | 10-32 (23) | 10-24 (15) | 14-23 (10) | N | 0.48 | 1.33 | 97.58%<br>(121/124)  | 67.74%<br>(84/124)  | <br>Pancreatic ribonuclease<br>Seminal ribonuclease           |
|     | 1y94A<br>(124) | 10-32 (23) | 10-24 (15) | 14-23 (10) |   |      |      |                      |                     |                                                                                                                                                  |
| 929 | 2aasA<br>(124) | 11-24 (14) | 12-24 (13) | 15-24 (10) | N | 0.49 | 1.42 | 100.00%<br>(124/124) | 81.45%<br>(101/124) | <br>Ribonuclease A<br>Protein (bovine seminal ribonuclease) |
|     | 11bgA<br>(124) | 11-24 (14) | 12-24 (13) | 15-24 (10) |   |      |      |                      |                     |                                                                                                                                                  |

|     |                |            |            |            |   |      |      |                      |                     |                                                                                                                                 |
|-----|----------------|------------|------------|------------|---|------|------|----------------------|---------------------|---------------------------------------------------------------------------------------------------------------------------------|
| 930 | 2aasA<br>(124) | 10-24 (15) | 21-24 (4)  | 17-24 (8)  | N | 0.61 | 1.38 | 100.00%<br>(124/124) | 81.45%<br>(101/124) | <br>Ribonuclease A<br>Seminal ribonuclease    |
|     | 1y92B<br>(124) | 10-24 (15) | 21-24 (4)  | 17-24 (8)  |   |      |      |                      |                     |                                                                                                                                 |
| 931 | 2aasA<br>(124) | 12-24 (13) | 12-24 (13) | 19-24 (6)  | N | 0.51 | 1.41 | 100.00%<br>(124/124) | 82.26%<br>(102/124) | <br>Ribonuclease A<br>Seminal ribonuclease   |
|     | 3bcoA<br>(124) | 12-24 (13) | 12-24 (13) | 19-24 (6)  |   |      |      |                      |                     |                                                                                                                                 |
| 932 | 2aasA<br>(124) | 12-24 (13) | 12-24 (13) | 15-24 (10) | N | 0.52 | 1.47 | 100.00%<br>(124/124) | 83.87%<br>(104/124) | <br>Ribonuclease A<br>Seminal ribonuclease |
|     | 1y94A<br>(124) | 12-24 (13) | 12-24 (13) | 15-24 (10) |   |      |      |                      |                     |                                                                                                                                 |

|     |                |           |           |           |   |      |      |                      |                     |                                                                                                                                                                             |
|-----|----------------|-----------|-----------|-----------|---|------|------|----------------------|---------------------|-----------------------------------------------------------------------------------------------------------------------------------------------------------------------------|
| 933 | 2nuiA<br>(124) | 15-22 (8) | 15-22 (8) | 15-22 (8) | N | 0.60 | 0.84 | 100.00%<br>(124/124) | 80.65%<br>(100/124) | 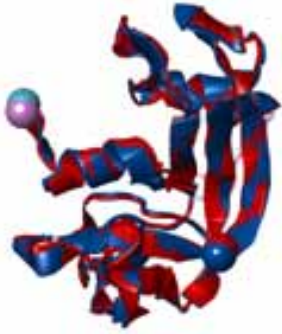       |
|     | 11bgA<br>(124) | 15-22 (8) | 15-22 (8) | 15-22 (8) |   |      |      |                      |                     |                                                                                                                                                                             |
| 934 | 2nuiA<br>(124) | 15-23 (9) | 15-23 (9) | 17-22 (6) | N | 0.66 | 0.87 | 100.00%<br>(124/124) | 80.65%<br>(100/124) |       |
|     | 1y92B<br>(124) | 15-23 (9) | 15-23 (9) | 17-22 (6) |   |      |      |                      |                     |                                                                                                                                                                             |
| 935 | 2nuiA<br>(124) | 15-22 (8) | 15-22 (8) | 15-22 (8) | N | 0.58 | 0.83 | 100.00%<br>(124/124) | 81.45%<br>(101/124) |   |
|     | 3bcoA<br>(124) | 15-22 (8) | 15-22 (8) | 15-22 (8) |   |      |      |                      |                     |                                                                                                                                                                             |



|     |                |            |            |            |   |      |      |                      |                     |                                                                                                                                                   |
|-----|----------------|------------|------------|------------|---|------|------|----------------------|---------------------|---------------------------------------------------------------------------------------------------------------------------------------------------|
| 936 | 2nuiA<br>(124) | 15-22 (8)  | 15-22 (8)  | 15-22 (8)  | N | 0.56 | 0.89 | 100.00%<br>(124/124) | 83.06%<br>(103/124) |  <p>Ribonuclease pancreatic<br/>Seminal ribonuclease</p>        |
|     | 1y94A<br>(124) | 15-22 (8)  | 15-22 (8)  | 15-22 (8)  |   |      |      |                      |                     |                                                                                                                                                   |
| 937 | 1qwqA<br>(124) | 12-29 (18) | 12-24 (13) | 13-24 (12) | N | 0.65 | 1.79 | 97.58%<br>(121/124)  | 92.74%<br>(115/124) |  <p>Ribonuclease<br/>Protein (bovine seminal ribonuclease)</p> |
|     | 11bgA<br>(124) | 12-29 (18) | 12-24 (13) | 13-24 (12) |   |      |      |                      |                     |                                                                                                                                                   |
| 938 | 1qwqA<br>(124) | 12-26 (15) | 12-24 (13) | 19-24 (6)  | N | 0.54 | 1.59 | 99.19%<br>(123/124)  | 98.39%<br>(122/124) |  <p>Ribonuclease<br/>Seminal ribonuclease</p>                |
|     | 1y92B<br>(124) | 12-26 (15) | 12-24 (13) | 19-24 (6)  |   |      |      |                      |                     |                                                                                                                                                   |

|     |                |            |            |            |   |      |      |                      |                     |                                                                                                                                                  |
|-----|----------------|------------|------------|------------|---|------|------|----------------------|---------------------|--------------------------------------------------------------------------------------------------------------------------------------------------|
| 939 | 1qwqA<br>(124) | 12-29 (18) | 12-24 (13) | 13-24 (12) | N | 0.62 | 1.78 | 97.58%<br>(121/124)  | 92.74%<br>(115/124) | <br>Ribonuclease<br>Seminal ribonuclease                       |
|     | 3bcoA<br>(124) | 12-29 (18) | 12-24 (13) | 13-24 (12) |   |      |      |                      |                     |                                                                                                                                                  |
| 940 | 1qwqA<br>(124) | 12-24 (13) | 12-24 (13) | 13-24 (12) | N | 0.63 | 1.79 | 98.39%<br>(122/124)  | 95.97%<br>(119/124) | <br>Ribonuclease<br>Seminal ribonuclease                     |
|     | 1y94A<br>(124) | 12-24 (13) | 12-24 (13) | 13-24 (12) |   |      |      |                      |                     |                                                                                                                                                  |
| 941 | lizpA<br>(124) | 15-22 (8)  | 15-22 (8)  | 15-22 (8)  | N | 0.57 | 0.89 | 100.00%<br>(124/124) | 80.65%<br>(100/124) | <br>Ribonuclease A<br>Protein (bovine seminal ribonuclease) |
|     | 11bgA<br>(124) | 15-22 (8)  | 15-22 (8)  | 15-22 (8)  |   |      |      |                      |                     |                                                                                                                                                  |

|     |                |           |           |           |   |      |      |                      |                     |                                                                                                                                                                                |
|-----|----------------|-----------|-----------|-----------|---|------|------|----------------------|---------------------|--------------------------------------------------------------------------------------------------------------------------------------------------------------------------------|
| 942 | lizpA<br>(124) | 15-23 (9) | 15-22 (8) | 17-22 (6) | N | 0.65 | 0.86 | 100.00%<br>(124/124) | 80.65%<br>(100/124) | 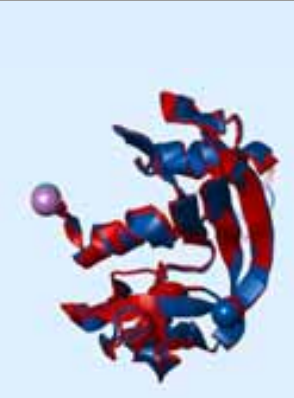<br>       |
|     | 1y92B<br>(124) | 15-23 (9) | 15-22 (8) | 17-22 (6) |   |      |      |                      |                     |                                                                                                                                                                                |
| 943 | lizpA<br>(124) | 15-22 (8) | 15-22 (8) | 15-22 (8) | N | 0.58 | 0.85 | 100.00%<br>(124/124) | 81.45%<br>(101/124) | <br>     |
|     | 3bcoA<br>(124) | 15-22 (8) | 15-22 (8) | 15-22 (8) |   |      |      |                      |                     |                                                                                                                                                                                |
| 944 | lizpA<br>(124) | 15-22 (8) | 15-22 (8) | 15-22 (8) | N | 0.53 | 0.95 | 100.00%<br>(124/124) | 83.06%<br>(103/124) | <br> |
|     | 1y94A<br>(124) | 15-22 (8) | 15-22 (8) | 15-22 (8) |   |      |      |                      |                     |                                                                                                                                                                                |

|     |               |            |           |           |   |      |      |                   |                   |                                                                                                                                                                                                                                                                                         |
|-----|---------------|------------|-----------|-----------|---|------|------|-------------------|-------------------|-----------------------------------------------------------------------------------------------------------------------------------------------------------------------------------------------------------------------------------------------------------------------------------------|
| 945 | 2v1qB<br>(58) | 27-38 (12) | 30-38 (9) | 30-37 (8) | C | 0.72 | 1.12 | 91.38%<br>(53/58) | 31.03%<br>(18/58) |   <p>Cytoskeleton assembly control protein<br/>SLA1<br/>Epidermal growth factor receptor<br/>kinase subst</p>     |
|     | 1i07A<br>(59) | 31-40 (10) | 34-40 (7) | 30-37 (8) |   |      |      |                   |                   |                                                                                                                                                                                                                                                                                         |
| 946 | 1sshA<br>(60) | 31-42 (12) | 31-39 (9) | 31-39 (9) | C | 0.65 | 1.41 | 89.83%<br>(53/59) | 27.12%<br>(16/59) |   <p>Hypothetical 40.4 kDa protein in<br/>PES4-HIS2 in<br/>Epidermal growth factor receptor<br/>kinase subst</p> |
|     | 1i07A<br>(59) | 34-42 (9)  | 34-39 (6) | 31-39 (9) |   |      |      |                   |                   |                                                                                                                                                                                                                                                                                         |
| 947 | 1h3hA<br>(60) | 46-53 (8)  | 46-53 (8) | 50-53 (4) | C | 0.69 | 1.48 | 93.22%<br>(55/59) | 30.51%<br>(18/59) |   <p>GRB2-related adaptor protein 2<br/>Epidermal growth factor receptor<br/>kinase subst</p>                 |
|     | 1i07A<br>(59) | 34-40 (7)  | 34-40 (7) | 50-53 (4) |   |      |      |                   |                   |                                                                                                                                                                                                                                                                                         |

|     |               |              |             |             |   |      |      |                   |                   |                                                                                                                                                                                      |
|-----|---------------|--------------|-------------|-------------|---|------|------|-------------------|-------------------|--------------------------------------------------------------------------------------------------------------------------------------------------------------------------------------|
| 948 | 2semB<br>(59) | 284-302 (19) | 284-291 (8) | 284-291 (8) | C | 0.75 | 1.35 | 94.92%<br>(56/59) | 22.03%<br>(13/59) |  <p>Protein (SEX muscle abnormal protein 5)<br/>Epidermal growth factor receptor kinase subst</p> |
|     | 1i07A<br>(59) | 34-52 (19)   | 34-40 (7)   | 284-291 (8) |   |      |      |                   |                   |                                                                                                                                                                                      |
| 949 | 1jo8A<br>(58) | 25-35 (11)   | 26-34 (9)   | 26-34 (9)   | C | 0.70 | 1.41 | 93.10%<br>(54/58) | 22.41%<br>(13/58) |  <p>Actin binding protein<br/>Epidermal growth factor receptor kinase subst</p>                   |
|     | 1i07A<br>(59) | 31-40 (10)   | 32-39 (8)   | 26-34 (9)   |   |      |      |                   |                   |                                                                                                                                                                                      |
| 950 | 4hckA<br>(61) | 90-137 (48)  | 108-114 (7) | 110-114 (5) | N | 0.72 | 1.52 | 96.61%<br>(57/59) | 27.12%<br>(16/59) |  <p>Hematopoietic cell kinase<br/>Epidermal growth factor receptor kinase subst</p>             |
|     | 1i07A<br>(59) | 16-62 (47)   | 34-40 (7)   | 110-114 (5) |   |      |      |                   |                   |                                                                                                                                                                                      |

|     |                |              |             |             |   |      |      |                     |                    |                                                                                                                                             |
|-----|----------------|--------------|-------------|-------------|---|------|------|---------------------|--------------------|---------------------------------------------------------------------------------------------------------------------------------------------|
| 951 | 1m7A<br>(112)  | 57-63 (9)    | 58-63 (6)   | 58-61 (4)   | N | 0.56 | 0.92 | 99.09%<br>(109/110) | 52.73%<br>(58/110) |  <p>Cystatin D<br/>Cystatin C</p>                         |
|     | 1r4cA<br>(110) | 56-63 (8)    | 57-61 (5)   | 58-61 (4)   |   |      |      |                     |                    |                                                                                                                                             |
| 952 | 1yvbI<br>(111) | 48-64 (17)   | 53-59 (7)   | 55-57 (3)   | C | 0.82 | 1.24 | 98.18%<br>(108/110) | 44.55%<br>(49/110) |  <p>Cystatin<br/>Cystatin C</p>                         |
|     | 1r4cA<br>(110) | 50-66 (17)   | 55-61 (7)   | 55-57 (3)   |   |      |      |                     |                    |                                                                                                                                             |
| 953 | 1yupE<br>(154) | 120-129 (10) | 124-129 (6) | 124-129 (6) | C | 0.56 | 1.94 | 90.91%<br>(140/154) | 16.23%<br>(25/154) |  <p>Beta-lactoglobulin<br/>Odorant-binding protein</p> |
|     | 1g85A<br>(159) | 117-125 (9)  | 121-125 (5) | 124-129 (6) |   |      |      |                     |                    |                                                                                                                                             |

|     |                |              |             |             |   |      |      |                     |                    |                                                                                                                                        |
|-----|----------------|--------------|-------------|-------------|---|------|------|---------------------|--------------------|----------------------------------------------------------------------------------------------------------------------------------------|
| 954 | 1yupE<br>(154) | 120-129 (10) | 124-129 (6) | 124-128 (5) | C | 0.59 | 1.89 | 91.39%<br>(138/151) | 16.56%<br>(25/151) | <br>Beta-lactoglobulin<br>Odorant binding protein    |
|     | 1pboB<br>(151) | 117-125 (9)  | 121-125 (5) | 124-128 (5) |   |      |      |                     |                    |                                                                                                                                        |
| 955 | 1yupE<br>(154) | 124-129 (6)  | 124-129 (6) | 124-129 (6) | C | 0.56 | 1.94 | 90.91%<br>(140/154) | 16.23%<br>(25/154) | <br>Beta-lactoglobulin<br>Odorant-binding protein  |
|     | 1gt3A<br>(159) | 121-125 (5)  | 121-125 (5) | 124-129 (6) |   |      |      |                     |                    |                                                                                                                                        |
| 956 | 1yupE<br>(154) | 121-129 (9)  | 124-129 (6) | 124-129 (6) | C | 0.56 | 2.03 | 91.56%<br>(141/154) | 16.23%<br>(25/154) | <br>Beta-lactoglobulin<br>Odorant-binding protein |
|     | 1gt1A<br>(158) | 118-125 (8)  | 121-125 (5) | 124-129 (6) |   |      |      |                     |                    |                                                                                                                                        |

|     |                |             |             |             |   |      |      |                     |                   |                                                                                       |
|-----|----------------|-------------|-------------|-------------|---|------|------|---------------------|-------------------|---------------------------------------------------------------------------------------|
| 957 | IqwdA<br>(167) | 142-147 (6) | 143-147 (5) | 143-147 (5) | C | 0.35 | 2.34 | 77.36%<br>(123/159) | 8.18%<br>(13/159) | 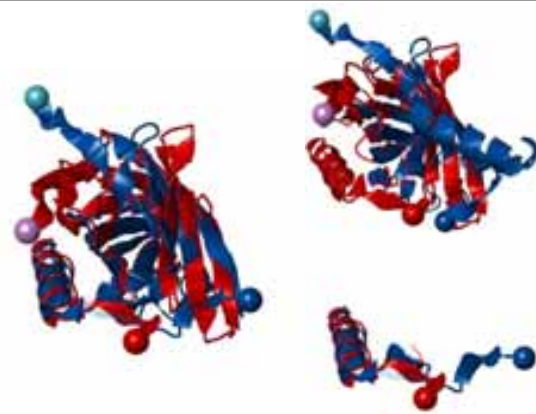    |
|     | Ig85A<br>(159) | 120-124 (5) | 121-124 (4) | 143-147 (5) |   |      |      |                     |                   |                                                                                       |
| 958 | IqwdA<br>(167) | 142-147 (6) | 143-147 (5) | 143-147 (5) | C | 0.36 | 2.33 | 77.36%<br>(123/159) | 8.18%<br>(13/159) |   |
|     | Igt3A<br>(159) | 120-124 (5) | 121-124 (4) | 143-147 (5) |   |      |      |                     |                   |                                                                                       |
| 959 | IqwdA<br>(167) | 142-147 (6) | 143-147 (5) | 143-147 (5) | C | 0.36 | 2.40 | 78.48%<br>(124/158) | 8.23%<br>(13/158) |  |
|     | Igt1A<br>(158) | 120-124 (5) | 121-124 (4) | 143-147 (5) |   |      |      |                     |                   |                                                                                       |



|     |                |              |             |             |   |      |      |                     |                    |                                                                                                                                                                                                                                                                                                                      |
|-----|----------------|--------------|-------------|-------------|---|------|------|---------------------|--------------------|----------------------------------------------------------------------------------------------------------------------------------------------------------------------------------------------------------------------------------------------------------------------------------------------------------------------|
| 960 | 2q39B<br>(151) | 306-329 (24) | 324-329 (6) | 324-329 (6) | C | 0.59 | 1.99 | 92.05%<br>(139/151) | 15.89%<br>(24/151) |  <br> <p>Beta-lactoglobulin<br/>Odorant binding protein</p> |
|     | 1pboB<br>(151) | 102-125 (24) | 121-125 (5) | 324-329 (6) |   |      |      |                     |                    |                                                                                                                                                                                                                                                                                                                      |
| 961 | 1bj7A<br>(150) | 113-123 (11) | 119-123 (5) | 119-123 (5) | C | 0.67 | 1.80 | 98.00%<br>(147/150) | 26.67%<br>(40/150) |  <br> <p>D 2<br/>Odorant-binding protein</p>                |
|     | 1g85A<br>(159) | 115-124 (10) | 121-124 (4) | 119-123 (5) |   |      |      |                     |                    |                                                                                                                                                                                                                                                                                                                      |
| 962 | 1bj7A<br>(150) | 113-124 (12) | 119-122 (4) | 119-123 (5) | C | 0.70 | 1.81 | 98.00%<br>(147/150) | 26.67%<br>(40/150) |  <br> <p>D 2<br/>Odorant binding protein</p>          |
|     | 1pboB<br>(151) | 115-125 (11) | 121-123 (3) | 119-123 (5) |   |      |      |                     |                    |                                                                                                                                                                                                                                                                                                                      |

|     |                |              |             |             |   |      |      |                     |                    |                                                                                                                                                  |
|-----|----------------|--------------|-------------|-------------|---|------|------|---------------------|--------------------|--------------------------------------------------------------------------------------------------------------------------------------------------|
| 963 | 1bj7A<br>(150) | 115-124 (10) | 119-123 (5) | 119-123 (5) | C | 0.67 | 1.79 | 98.00%<br>(147/150) | 27.33%<br>(41/150) | 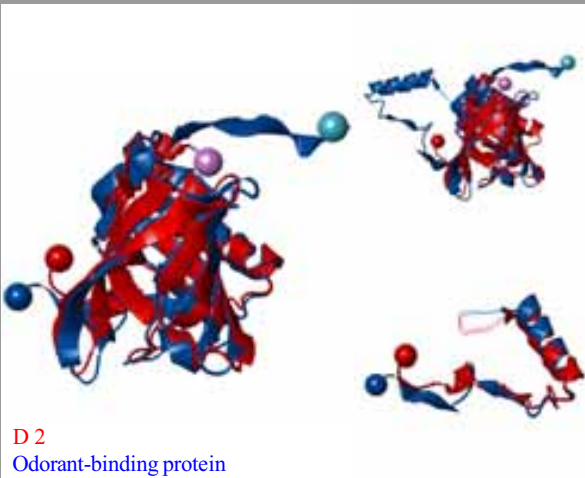 <p>D 2<br/>Odorant-binding protein</p>                        |
|     | 1gt3A<br>(159) | 117-125 (9)  | 121-124 (4) | 119-123 (5) |   |      |      |                     |                    |                                                                                                                                                  |
| 964 | 1bj7A<br>(150) | 113-124 (12) | 119-123 (5) | 119-123 (5) | C | 0.67 | 1.80 | 98.00%<br>(147/150) | 27.33%<br>(41/150) |  <p>D 2<br/>Odorant-binding protein</p>                      |
|     | 1gt1A<br>(158) | 115-125 (11) | 121-124 (4) | 119-123 (5) |   |      |      |                     |                    |                                                                                                                                                  |
| 965 | 1dzkA<br>(148) | 117-125 (9)  | 119-124 (6) | 119-123 (5) | C | 0.74 | 1.41 | 98.65%<br>(146/148) | 42.57%<br>(63/148) |  <p>Odorant-binding protein<br/>Odorant-binding protein</p> |
|     | 1g85A<br>(159) | 118-125 (8)  | 120-124 (5) | 119-123 (5) |   |      |      |                     |                    |                                                                                                                                                  |

|     |                |             |             |             |   |      |      |                     |                    |                                                                                                                                             |
|-----|----------------|-------------|-------------|-------------|---|------|------|---------------------|--------------------|---------------------------------------------------------------------------------------------------------------------------------------------|
| 966 | 1dzkA<br>(148) | 119-125 (7) | 119-124 (6) | 119-123 (5) | C | 0.78 | 1.43 | 98.65%<br>(146/148) | 43.24%<br>(64/148) | <br>Odorant-binding protein<br>Odorant binding protein   |
|     | 1pboB<br>(151) | 120-125 (6) | 120-124 (5) | 119-123 (5) |   |      |      |                     |                    |                                                                                                                                             |
| 967 | 1dzkA<br>(148) | 117-125 (9) | 119-124 (6) | 119-123 (5) | C | 0.74 | 1.40 | 98.65%<br>(146/148) | 41.89%<br>(62/148) | <br>Odorant-binding protein<br>Odorant-binding protein   |
|     | 1gt3A<br>(159) | 118-125 (8) | 120-124 (5) | 119-123 (5) |   |      |      |                     |                    |                                                                                                                                             |
| 968 | 1dzkA<br>(148) | 119-125 (7) | 119-124 (6) | 119-123 (5) | C | 0.74 | 1.42 | 98.65%<br>(146/148) | 41.89%<br>(62/148) | <br>Odorant-binding protein<br>Odorant-binding protein |
|     | 1gt1A<br>(158) | 120-125 (6) | 120-124 (5) | 119-123 (5) |   |      |      |                     |                    |                                                                                                                                             |

|     |                |             |             |             |   |      |      |                     |                    |                                                                                                                                           |
|-----|----------------|-------------|-------------|-------------|---|------|------|---------------------|--------------------|-------------------------------------------------------------------------------------------------------------------------------------------|
| 969 | lew3A<br>(159) | 24-32 (9)   | 24-32 (9)   | 30-30 (1)   | N | 0.30 | 1.83 | 75.47%<br>(120/159) | 16.35%<br>(26/159) | 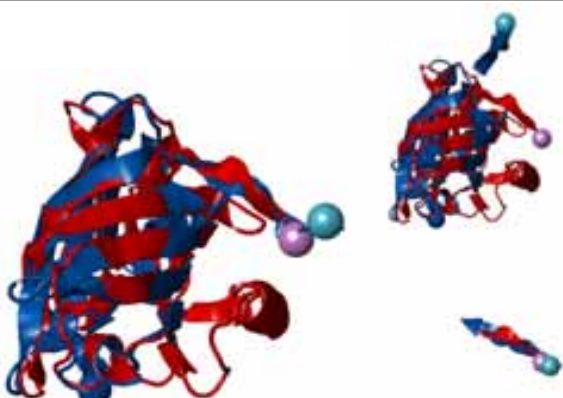 <p>Allergen EQU C 1<br/>Odorant-binding protein</p>    |
|     | lg85A<br>(159) | 3-12 (10)   | 3-12 (10)   | 30-30 (1)   |   |      |      |                     |                    |                                                                                                                                           |
| 970 | lew3A<br>(159) | 140-145 (6) | 141-145 (5) | 141-145 (5) | C | 0.62 | 1.89 | 93.08%<br>(148/159) | 22.01%<br>(35/159) |  <p>Allergen EQU C 1<br/>Odorant-binding protein</p>   |
|     | lg85A<br>(159) | 120-124 (5) | 121-124 (4) | 141-145 (5) |   |      |      |                     |                    |                                                                                                                                           |
| 971 | lew3A<br>(159) | 140-146 (7) | 141-145 (5) | 141-145 (5) | C | 0.65 | 1.91 | 98.01%<br>(148/151) | 23.18%<br>(35/151) |  <p>Allergen EQU C 1<br/>Odorant binding protein</p> |
|     | lpboB<br>(151) | 120-125 (6) | 121-124 (4) | 141-145 (5) |   |      |      |                     |                    |                                                                                                                                           |

|     |                |             |             |             |   |      |      |                     |                    |                                                                                                                                           |
|-----|----------------|-------------|-------------|-------------|---|------|------|---------------------|--------------------|-------------------------------------------------------------------------------------------------------------------------------------------|
| 972 | lew3A<br>(159) | 24-35 (12)  | 24-32 (9)   | 30-30 (1)   | N | 0.30 | 1.83 | 75.47%<br>(120/159) | 16.98%<br>(27/159) | 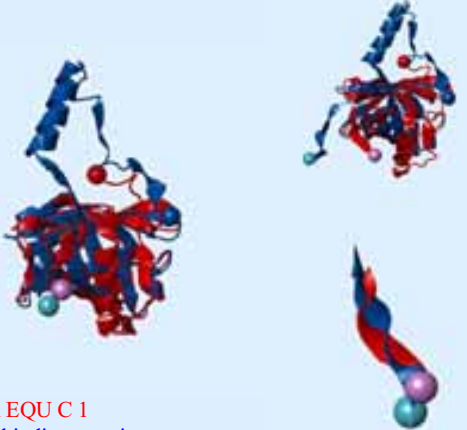 <p>Allergen EQU C 1<br/>Odorant-binding protein</p>   |
|     | lgt3A<br>(159) | 3-15 (13)   | 3-12 (10)   | 30-30 (1)   |   |      |      |                     |                    |                                                                                                                                           |
| 973 | lew3A<br>(159) | 141-145 (5) | 141-145 (5) | 141-145 (5) | C | 0.62 | 1.89 | 93.08%<br>(148/159) | 22.64%<br>(36/159) |  <p>Allergen EQU C 1<br/>Odorant-binding protein</p>   |
|     | lgt3A<br>(159) | 121-124 (4) | 121-124 (4) | 141-145 (5) |   |      |      |                     |                    |                                                                                                                                           |
| 974 | lew3A<br>(159) | 24-32 (9)   | 29-32 (4)   | 30-30 (1)   | N | 0.31 | 1.83 | 75.95%<br>(120/158) | 17.09%<br>(27/158) |  <p>Allergen EQU C 1<br/>Odorant-binding protein</p> |
|     | lgt1A<br>(158) | 3-12 (10)   | 8-12 (5)    | 30-30 (1)   |   |      |      |                     |                    |                                                                                                                                           |

|     |                |             |             |             |   |      |      |                     |                    |                                                                                                                                                                                   |
|-----|----------------|-------------|-------------|-------------|---|------|------|---------------------|--------------------|-----------------------------------------------------------------------------------------------------------------------------------------------------------------------------------|
| 975 | 1ew3A<br>(159) | 140-145 (6) | 141-145 (5) | 141-145 (5) | C | 0.63 | 1.89 | 93.67%<br>(148/158) | 22.78%<br>(36/158) |  <p>Allergen EQU C 1<br/>Odorant-binding protein</p>                                            |
|     | 1gt1A<br>(158) | 120-124 (5) | 121-124 (4) | 141-145 (5) |   |      |      |                     |                    |                                                                                                                                                                                   |
| 976 | 2a2uA<br>(158) | 122-129 (8) | 122-129 (8) | 122-129 (8) | C | 0.70 | 1.47 | 95.36%<br>(144/151) | 26.49%<br>(40/151) |  <p>Protein (alpha-2U-globulin)<br/>Odorant binding protein</p>                               |
|     | 1pboB<br>(151) | 121-127 (7) | 121-127 (7) | 122-129 (8) |   |      |      |                     |                    |                                                                                                                                                                                   |
| 977 | 1hcFX<br>(101) | 298-301 (4) | 298-300 (3) | 298-300 (3) | N | 0.73 | 1.29 | 96.04%<br>(97/101)  | 45.54%<br>(46/101) |  <p>Bdnf/nt-3 growth factors receptor<br/>HIGH affinity nerve growth factor<br/>receptor</p> |
|     | 1he7A<br>(107) | 296-299 (4) | 296-298 (3) | 298-300 (3) |   |      |      |                     |                    |                                                                                                                                                                                   |

|     |                |              |              |           |   |      |      |                    |                    |                                                                                                                                                                                                                                                                                                                                                                      |
|-----|----------------|--------------|--------------|-----------|---|------|------|--------------------|--------------------|----------------------------------------------------------------------------------------------------------------------------------------------------------------------------------------------------------------------------------------------------------------------------------------------------------------------------------------------------------------------|
| 978 | 1fhgA<br>(102) | 50-65 (16)   | 50-58 (9)    | 50-57 (8) | N | 0.56 | 1.99 | 92.16%<br>(94/102) | 14.71%<br>(15/102) |  <br><br>Telokin<br>HIGH affinity nerve growth factor<br>receptor                                           |
|     | 1he7A<br>(107) | 295-305 (11) | 295-298 (4)  | 50-57 (8) |   |      |      |                    |                    |                                                                                                                                                                                                                                                                                                                                                                      |
| 979 | 2dm3A<br>(110) | 7-44 (38)    | 7-31 (25)    | 21-25 (5) | N | 0.55 | 1.90 | 88.79%<br>(95/107) | 18.69%<br>(20/107) |  <br>KIAA0992 protein<br>HIGH affinity nerve growth factor<br>receptor                                                                                                                        |
|     | 1he7A<br>(107) | 283-316 (34) | 283-303 (21) | 21-25 (5) |   |      |      |                    |                    |                                                                                                                                                                                                                                                                                                                                                                      |
| 980 | 1g1cA<br>(98)  | 5-28 (24)    | 5-21 (17)    | 20-21 (2) | N | 0.63 | 1.75 | 95.92%<br>(94/98)  | 17.35%<br>(17/98)  |  <br><br>Immunoglobulin-LIKE domain I1<br>FROM titin<br>HIGH affinity nerve growth factor<br>receptor |
|     | 1he7A<br>(107) | 283-304 (22) | 283-297 (15) | 20-21 (2) |   |      |      |                    |                    |                                                                                                                                                                                                                                                                                                                                                                      |

|     |                |              |              |           |   |      |      |                     |                    |                                                                                                                                                                                                                                                                          |
|-----|----------------|--------------|--------------|-----------|---|------|------|---------------------|--------------------|--------------------------------------------------------------------------------------------------------------------------------------------------------------------------------------------------------------------------------------------------------------------------|
| 981 | 1u2hA<br>(96)  | 19-40 (22)   | 19-36 (18)   | 34-35 (2) | N | 0.67 | 1.46 | 95.83%<br>(92/96)   | 19.79%<br>(19/96)  |  <br>Aortic preferentially expressed protein<br>1<br>HIGH affinity nerve growth factor<br>receptor |
|     | 1he7A<br>(107) | 283-302 (20) | 283-298 (16) | 34-35 (2) |   |      |      |                     |                    |                                                                                                                                                                                                                                                                          |
| 982 | 2a5mA<br>(177) | 86-93 (8)    | 86-92 (7)    | 89-92 (4) | C | 0.77 | 1.42 | 98.31%<br>(174/177) | 33.90%<br>(60/177) |  <br>Gamma crystallin S<br>Beta crystallin B2                                                      |
|     | 1ytqA<br>(181) | 100-106 (7)  | 100-105 (6)  | 89-92 (4) |   |      |      |                     |                    |                                                                                                                                                                                                                                                                          |
| 983 | 2a5mA<br>(177) | 83-93 (11)   | 84-93 (10)   | 89-93 (5) | C | 0.77 | 1.43 | 98.31%<br>(174/177) | 33.90%<br>(60/177) |  <br>Gamma crystallin S<br>Beta B2-crystallin                                                  |
|     | 2bb2A<br>(181) | 79-88 (10)   | 80-88 (9)    | 89-93 (5) |   |      |      |                     |                    |                                                                                                                                                                                                                                                                          |



|     |                |             |             |           |   |      |      |                     |                    |                                                                                                                                        |
|-----|----------------|-------------|-------------|-----------|---|------|------|---------------------|--------------------|----------------------------------------------------------------------------------------------------------------------------------------|
| 984 | 1a45A<br>(173) | 79-91 (13)  | 82-89 (8)   | 82-88 (7) | C | 0.74 | 1.51 | 98.27%<br>(170/173) | 35.26%<br>(61/173) |  <p>Gamma crystallin<br/>Beta crystallin B2</p>     |
|     | lytqA<br>(181) | 97-109 (13) | 100-107 (8) | 82-88 (7) |   |      |      |                     |                    |                                                                                                                                        |
| 985 | 2v2uA<br>(173) | 79-89 (11)  | 79-87 (9)   | 84-87 (4) | N | 0.80 | 1.22 | 98.84%<br>(171/173) | 35.84%<br>(62/173) |  <p>Gamma crystallin C<br/>Beta B2-crystallin</p>  |
|     | 2bb2A<br>(181) | 79-90 (12)  | 79-88 (10)  | 84-87 (4) |   |      |      |                     |                    |                                                                                                                                        |
| 986 | 1ammA<br>(174) | 79-90 (12)  | 79-87 (9)   | 84-87 (4) | C | 0.80 | 1.23 | 98.85%<br>(172/174) | 36.78%<br>(64/174) |  <p>Gamma B-crystallin<br/>Beta B2-crystallin</p> |
|     | 2bb2A<br>(181) | 79-90 (12)  | 79-87 (9)   | 84-87 (4) |   |      |      |                     |                    |                                                                                                                                        |

|     |                |             |             |           |   |      |      |                     |                    |                                                                                                                                        |
|-----|----------------|-------------|-------------|-----------|---|------|------|---------------------|--------------------|----------------------------------------------------------------------------------------------------------------------------------------|
| 987 | IzwmA<br>(177) | 86-93 (8)   | 86-92 (7)   | 89-92 (4) | C | 0.77 | 1.45 | 98.31%<br>(174/177) | 33.90%<br>(60/177) |  <p>Gamma crystallin S<br/>Beta crystallin B2</p>    |
|     | lytqA<br>(181) | 100-106 (7) | 100-105 (6) | 89-92 (4) |   |      |      |                     |                    |                                                                                                                                        |
| 988 | 2jdfA<br>(175) | 79-91 (13)  | 82-89 (8)   | 82-87 (6) | C | 0.79 | 1.30 | 98.29%<br>(172/175) | 34.86%<br>(61/175) |  <p>Gamma crystallin B<br/>Beta crystallin B2</p>  |
|     | lytqA<br>(181) | 97-109 (13) | 100-107 (8) | 82-87 (6) |   |      |      |                     |                    |                                                                                                                                        |
| 989 | 2jdfA<br>(175) | 79-90 (13)  | 80-88 (9)   | 82-87 (6) | C | 0.78 | 1.31 | 98.29%<br>(172/175) | 34.86%<br>(61/175) |  <p>Gamma crystallin B<br/>Beta B2-crystallin</p> |
|     | 2bb2A<br>(181) | 79-90 (12)  | 80-88 (9)   | 82-87 (6) |   |      |      |                     |                    |                                                                                                                                        |

|     |                |              |              |              |   |      |      |                      |                    |                                                                                                                                                                |
|-----|----------------|--------------|--------------|--------------|---|------|------|----------------------|--------------------|----------------------------------------------------------------------------------------------------------------------------------------------------------------|
| 990 | 1h4aX<br>(173) | 77-89 (13)   | 79-88 (10)   | 82-88 (7)    | N | 0.80 | 1.23 | 98.84%<br>(171/173)  | 34.68%<br>(60/173) |  <p>Gamma crystallin D<br/>Beta B2-crystallin</p>                            |
|     | 2bb2A<br>(181) | 77-89 (13)   | 79-88 (10)   | 82-88 (7)    |   |      |      |                      |                    |                                                                                                                                                                |
| 991 | 2jdgA<br>(171) | 80-90 (11)   | 82-90 (9)    | 82-88 (7)    | C | 0.80 | 1.29 | 100.00%<br>(171/171) | 34.50%<br>(59/171) |  <p>Gamma crystallin B<br/>Beta crystallin B2</p>                           |
|     | 1ytqA<br>(181) | 98-108 (11)  | 100-108 (9)  | 82-88 (7)    |   |      |      |                      |                    |                                                                                                                                                                |
| 992 | 1ez3B<br>(124) | 104-114 (11) | 104-114 (11) | 104-114 (11) | C | 0.41 | 1.59 | 85.39%<br>(76/89)    | 12.36%<br>(11/89)  |  <p>Syntaxin-1A<br/>T-snare affecting a LATE golgi<br/>compartment PR</p> |
|     | 2c5jB<br>(89)  | 77-78 (2)    | 77-78 (2)    | 104-114 (11) |   |      |      |                      |                    |                                                                                                                                                                |

|     |                |            |            |           |   |      |      |                   |                   |                                                                                                                                                             |
|-----|----------------|------------|------------|-----------|---|------|------|-------------------|-------------------|-------------------------------------------------------------------------------------------------------------------------------------------------------------|
| 993 | 1lvfA<br>(106) | 70-76 (7)  | 70-76 (7)  | 70-76 (7) | C | 0.59 | 1.90 | 98.88%<br>(88/89) | 22.47%<br>(20/89) |  <p>Syntaxin 6<br/>T-snare affecting a LATE golgi<br/>compartment PR</p> |
|     | 2c5jB<br>(89)  | 61-62 (2)  | 61-62 (2)  | 70-76 (7) |   |      |      |                   |                   |                                                                                                                                                             |
| 994 | 2iggA<br>(64)  | 40-64 (25) | 41-55 (15) | 51-55 (5) | C | 0.51 | 2.10 | 92.19%<br>(59/64) | 7.81%<br>(5/64)   |  <p>Protein G<br/>Protein L</p>                                         |
|     | 1k51A<br>(72)  | 38-64 (27) | 39-55 (17) | 51-55 (5) |   |      |      |                   |                   |                                                                                                                                                             |
| 995 | 2igdA<br>(61)  | 49-60 (12) | 49-60 (12) | 52-52 (1) | C | 0.53 | 2.02 | 95.08%<br>(58/61) | 14.75%<br>(9/61)  |  <p>Protein G<br/>Protein L</p>                                        |
|     | 1k51A<br>(72)  | 50-63 (14) | 50-63 (14) | 52-52 (1) |   |      |      |                   |                   |                                                                                                                                                             |

|     |               |              |             |             |   |      |      |                    |                   |                                                                                                                        |
|-----|---------------|--------------|-------------|-------------|---|------|------|--------------------|-------------------|------------------------------------------------------------------------------------------------------------------------|
| 996 | 1mhhE<br>(63) | 868-877 (10) | 868-874 (7) | 869-874 (6) | C | 0.77 | 0.93 | 98.41%<br>(62/63)  | 58.73%<br>(37/63) | <br>Protein L domain C<br>Protein L |
|     | 1k51A<br>(72) | 51-59 (9)    | 51-56 (6)   | 869-874 (6) |   |      |      |                    |                   |                                                                                                                        |
| 997 | 1kh0A<br>(65) | 45-58 (14)   | 50-58 (9)   | 55-57 (3)   | C | 0.78 | 0.86 | 96.92%<br>(63/65)  | 78.46%<br>(51/65) | <br>Protein L<br>Protein L          |
|     | 1k51A<br>(72) | 45-56 (12)   | 50-56 (7)   | 55-57 (3)   |   |      |      |                    |                   |                                                                                                                        |
| 998 | 1hz6B<br>(63) | 49-57 (9)    | 50-56 (7)   | 53-57 (5)   | C | 0.74 | 1.29 | 100.00%<br>(63/63) | 98.41%<br>(62/63) | <br>Protein L<br>Protein L        |
|     | 1k51A<br>(72) | 49-57 (9)    | 50-56 (7)   | 53-57 (5)   |   |      |      |                    |                   |                                                                                                                        |

|      |                |                               |                              |                             |   |      |      |                      |                     |                                                                                                                                                  |
|------|----------------|-------------------------------|------------------------------|-----------------------------|---|------|------|----------------------|---------------------|--------------------------------------------------------------------------------------------------------------------------------------------------|
| 999  | 1le4A<br>(139) | 39-56 (18)                    | 39-56 (18)                   | 41-56 (16)                  | N | 0.27 | 2.31 | 82.84%<br>(111/134)  | 11.94%<br>(16/134)  |  <p>Apolipoprotein E4<br/>Focal adhesion kinase 1</p>          |
|      | 1ow6A<br>(134) | 941-950 (10)                  | 941-950 (10)                 | 41-56 (16)                  |   |      |      |                      |                     |                                                                                                                                                  |
| 1000 | 1k40A<br>(126) | 942-950 (9)                   | 942-950 (9)                  | 943-944 (2)                 | N | 0.64 | 1.05 | 100.00%<br>(126/126) | 96.83%<br>(122/126) |  <p>Adhesion kinase<br/>Focal adhesion kinase 1</p>           |
|      | 1ow6A<br>(134) | 942-950 (9)                   | 942-950 (9)                  | 943-944 (2)                 |   |      |      |                      |                     |                                                                                                                                                  |
| 1001 | 1e87A<br>(117) | 133-154 (22),<br>161-183 (23) | 150-153 (4),<br>161-182 (22) | 150-153 (4),<br>168-173 (6) | M | 0.67 | 1.65 | 95.73%<br>(112/117)  | 21.37%<br>(25/117)  |  <p>Early activation antigen CD69<br/>Echicetin B-chain</p> |
|      | 1oz7B<br>(123) | 52-78 (27),<br>85-108 (24)    | 73-77 (5),<br>85-107 (23)    | 150-153 (4),<br>168-173 (6) |   |      |      |                      |                     |                                                                                                                                                  |

|      |                |                               |                              |                             |   |      |      |                     |                    |                                                                                                                                                                                                                                             |
|------|----------------|-------------------------------|------------------------------|-----------------------------|---|------|------|---------------------|--------------------|---------------------------------------------------------------------------------------------------------------------------------------------------------------------------------------------------------------------------------------------|
| 1002 | 1e87A<br>(117) | 145-155 (11),<br>162-172 (11) | 145-152 (8),<br>162-172 (11) | 146-149 (4),<br>168-172 (5) | M | 0.65 | 1.67 | 94.87%<br>(111/117) | 22.22%<br>(26/117) |   <p>Early activation antigen CD69<br/>EMS16 B chain</p>                |
|      | 1ukmB<br>(124) | 67-78 (12),<br>85-94 (10)     | 67-75 (9),<br>85-94 (10)     | 146-149 (4),<br>168-172 (5) |   |      |      |                     |                    |                                                                                                                                                                                                                                             |
| 1003 | 1e87A<br>(117) | 147-153 (7),<br>162-171 (10)  | 147-153 (7),<br>162-171 (10) | 149-153 (5),<br>169-171 (3) | M | 0.65 | 1.60 | 96.58%<br>(113/117) | 24.79%<br>(29/117) |   <p>Early activation antigen CD69<br/>EMS16 a chain</p>              |
|      | 1ukmA<br>(131) | 74-83 (10),<br>92-102 (11)    | 74-83 (10),<br>92-102 (11)   | 149-153 (5),<br>169-171 (3) |   |      |      |                     |                    |                                                                                                                                                                                                                                             |
| 1004 | 1e87A<br>(117) | 146-155 (10),<br>161-183 (23) | 147-153 (7),<br>161-171 (11) | 149-153 (5),<br>168-171 (4) | M | 0.66 | 1.64 | 95.73%<br>(112/117) | 26.50%<br>(31/117) |   <p>Early activation antigen CD69<br/>Bitiscetin alpha chain</p> |
|      | 1uexA<br>(125) | 71-83 (13),<br>89-114 (26)    | 72-81 (10),<br>89-98 (10)    | 149-153 (5),<br>168-171 (4) |   |      |      |                     |                    |                                                                                                                                                                                                                                             |

|      |                |                               |                              |                             |   |      |      |                     |                    |                                                                                                                                                                               |
|------|----------------|-------------------------------|------------------------------|-----------------------------|---|------|------|---------------------|--------------------|-------------------------------------------------------------------------------------------------------------------------------------------------------------------------------|
| 1005 | 1e87A<br>(117) | 147-155 (9),<br>161-172 (12)  | 147-152 (6),<br>161-172 (12) | 147-152 (6),<br>168-172 (5) | M | 0.69 | 1.62 | 96.58%<br>(113/117) | 23.08%<br>(27/117) | 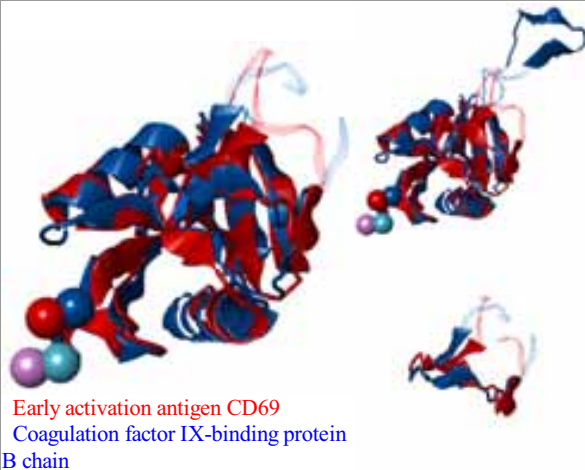 <p>Early activation antigen CD69<br/>Coagulation factor IX-binding protein<br/>B chain</p> |
|      | 1j34B<br>(123) | 270-279 (10),<br>285-295 (11) | 270-276 (7),<br>285-295 (11) | 147-152 (6),<br>168-172 (5) |   |      |      |                     |                    |                                                                                                                                                                               |
| 1006 | 1e87A<br>(117) | 147-155 (9),<br>161-183 (23)  | 147-153 (7),<br>161-172 (12) | 149-153 (5),<br>168-172 (5) | M | 0.69 | 1.67 | 97.44%<br>(114/117) | 19.66%<br>(23/117) |  <p>Early activation antigen CD69<br/>Platelet aggregation inducer</p>                    |
|      | 1jwiB<br>(123) | 72-81 (10),<br>87-110 (24)    | 72-79 (8),<br>87-97 (11)     | 149-153 (5),<br>168-172 (5) |   |      |      |                     |                    |                                                                                                                                                                               |
| 1007 | 1e87A<br>(117) | 133-155 (23),<br>158-189 (32) | 146-153 (8),<br>161-172 (12) | 147-153 (7),<br>167-172 (6) | M | 0.66 | 1.81 | 98.29%<br>(115/117) | 22.22%<br>(26/117) |  <p>Early activation antigen CD69<br/>Mucroctin beta chain</p>                           |
|      | 1v4IB<br>(125) | 254-281 (28),<br>284-316 (33) | 271-279 (9),<br>287-297 (11) | 147-153 (7),<br>167-172 (6) |   |      |      |                     |                    |                                                                                                                                                                               |



|      |                |                               |                               |                             |   |      |      |                     |                    |                                                                                                                                                                                  |
|------|----------------|-------------------------------|-------------------------------|-----------------------------|---|------|------|---------------------|--------------------|----------------------------------------------------------------------------------------------------------------------------------------------------------------------------------|
| 1008 | 1e87A<br>(117) | 147-154 (8),<br>161-171 (11)  | 147-154 (8),<br>162-171 (10)  | 149-152 (4),<br>169-171 (3) | M | 0.65 | 1.50 | 94.87%<br>(111/117) | 23.08%<br>(27/117) |  <p>Early activation antigen CD69<br/>Coagulation factor X binding protein</p>                |
|      | liodA<br>(129) | 72-82 (11),<br>89-100 (12)    | 72-82 (11),<br>90-100 (11)    | 149-152 (4),<br>169-171 (3) |   |      |      |                     |                    |                                                                                                                                                                                  |
| 1009 | 1e87A<br>(117) | 144-153 (10),<br>161-183 (23) | 144-153 (10),<br>161-183 (23) | 147-153 (7),<br>169-171 (3) | M | 0.65 | 1.58 | 97.44%<br>(114/117) | 26.50%<br>(31/117) |  <p>Early activation antigen CD69<br/>Convulxin alpha</p>                                    |
|      | luosA<br>(133) | 69-81 (13),<br>89-116 (28)    | 69-81 (13),<br>89-116 (28)    | 147-153 (7),<br>169-171 (3) |   |      |      |                     |                    |                                                                                                                                                                                  |
| 1010 | 1e87A<br>(117) | 144-153 (10),<br>162-183 (22) | 144-153 (10),<br>162-171 (10) | 147-153 (7),<br>166-171 (6) | M | 0.63 | 1.50 | 93.16%<br>(109/117) | 21.37%<br>(25/117) |  <p>Early activation antigen CD69<br/>Coagulation factor IX-binding protein<br/>a chain</p> |
|      | lj34A<br>(129) | 69-81 (13),<br>90-116 (27)    | 69-81 (13),<br>90-100 (11)    | 147-153 (7),<br>166-171 (6) |   |      |      |                     |                    |                                                                                                                                                                                  |

|      |                |                               |                               |                              |   |      |      |                     |                    |                                                                                                                                                   |
|------|----------------|-------------------------------|-------------------------------|------------------------------|---|------|------|---------------------|--------------------|---------------------------------------------------------------------------------------------------------------------------------------------------|
| 1011 | 1p4ID<br>(122) | 197-208 (12),<br>213-232 (20) | 198-208 (11),<br>213-232 (20) | 202-208 (7),<br>220-232 (13) | M | 0.51 | 2.10 | 90.16%<br>(110/122) | 19.67%<br>(24/122) | <br>LY49-C<br>EMS16 a chain                                    |
|      | lukmA<br>(131) | 70-82 (13),<br>88-104 (17)    | 71-82 (12),<br>88-104 (17)    | 202-208 (7),<br>220-232 (13) |   |      |      |                     |                    |                                                                                                                                                   |
| 1012 | 1p4ID<br>(122) | 197-207 (11),<br>210-256 (47) | 198-207 (10),<br>216-232 (17) | 201-207 (7),<br>223-232 (10) | M | 0.54 | 2.06 | 89.34%<br>(109/122) | 15.57%<br>(19/122) | <br>LY49-C<br>Coagulation factor IX-binding protein<br>B chain |
|      | 1j34B<br>(123) | 266-276 (11),<br>279-322 (44) | 267-276 (10),<br>282-296 (15) | 201-207 (7),<br>223-232 (10) |   |      |      |                     |                    |                                                                                                                                                   |
| 1013 | 1p4ID<br>(122) | 198-210 (13),<br>213-232 (20) | 199-207 (9),<br>213-232 (20)  | 206-207 (2),<br>219-232 (14) | M | 0.61 | 1.70 | 90.16%<br>(110/122) | 16.39%<br>(20/122) | <br>LY49-C<br>Platelet aggregation inducer                   |
|      | ljwiB<br>(123) | 69-81 (13),<br>84-98 (15)     | 70-78 (9),<br>84-98 (15)      | 206-207 (2),<br>219-232 (14) |   |      |      |                     |                    |                                                                                                                                                   |

|      |                |                               |                               |                              |   |      |      |                     |                    |                                                                                       |
|------|----------------|-------------------------------|-------------------------------|------------------------------|---|------|------|---------------------|--------------------|---------------------------------------------------------------------------------------|
| 1014 | 1p4ID<br>(122) | 198-207 (10),<br>210-243 (34) | 198-203 (6),<br>216-233 (18)  | 201-203 (3),<br>223-232 (10) | M | 0.53 | 2.05 | 89.34%<br>(109/122) | 17.21%<br>(21/122) | 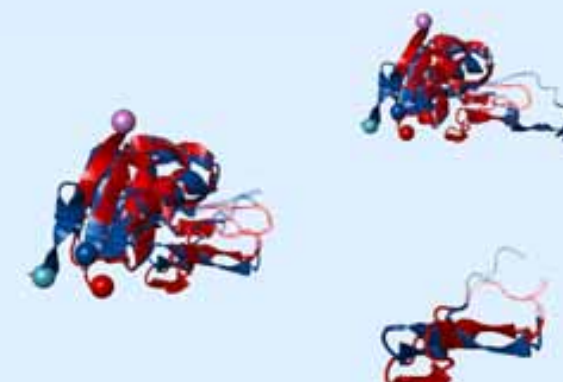   |
|      | 1v4IB<br>(125) | 269-278 (10),<br>281-311 (31) | 269-274 (6),<br>284-299 (16)  | 201-203 (3),<br>223-232 (10) |   |      |      |                     |                    |                                                                                       |
| 1015 | 1p4ID<br>(122) | 187-224 (38),<br>206-254 (49) | 198-209 (12),<br>213-232 (20) | 202-207 (6),<br>220-232 (13) | M | 0.51 | 2.09 | 89.34%<br>(109/122) | 19.67%<br>(24/122) |   |
|      | liodA<br>(129) | 52-98 (47),<br>79-128 (50)    | 69-82 (14),<br>86-102 (17)    | 202-207 (6),<br>220-232 (13) |   |      |      |                     |                    |                                                                                       |
| 1016 | 1r13A<br>(145) | 167-194 (28),<br>176-227 (52) | 169-177 (9),<br>191-218 (28)  | 170-177 (8),<br>193-202 (10) | M | 0.48 | 2.03 | 92.68%<br>(114/123) | 17.07%<br>(21/123) |  |
|      | 1oz7B<br>(123) | 66-93 (28),<br>74-120 (47)    | 68-75 (8),<br>90-111 (22)     | 170-177 (8),<br>193-202 (10) |   |      |      |                     |                    |                                                                                       |

|      |                |                               |                               |                               |   |      |      |                     |                    |                                                                                                                                                                       |
|------|----------------|-------------------------------|-------------------------------|-------------------------------|---|------|------|---------------------|--------------------|-----------------------------------------------------------------------------------------------------------------------------------------------------------------------|
| 1017 | 1r13A<br>(145) | 160-180 (21),<br>190-205 (16) | 168-180 (13),<br>190-205 (16) | 169-178 (10),<br>192-203 (12) | M | 0.48 | 1.93 | 88.71%<br>(110/124) | 19.35%<br>(24/124) |  <p>Pulmonary surfactant-associated<br/>protein a<br/>EMS16 B chain</p>            |
|      | 1ukmB<br>(124) | 56-78 (23),<br>88-96 (9)      | 66-78 (13),<br>88-96 (9)      | 169-178 (10),<br>192-203 (12) |   |      |      |                     |                    |                                                                                                                                                                       |
| 1018 | 1r13A<br>(145) | 167-178 (12),<br>194-211 (18) | 168-178 (11),<br>194-211 (18) | 172-178 (7),<br>194-202 (9)   | M | 0.50 | 1.86 | 87.79%<br>(115/131) | 18.32%<br>(24/131) |  <p>Pulmonary surfactant-associated<br/>protein a<br/>EMS16 a chain</p>           |
|      | 1ukmA<br>(131) | 70-82 (13),<br>99-114 (16)    | 71-82 (12),<br>99-114 (16)    | 172-178 (7),<br>194-202 (9)   |   |      |      |                     |                    |                                                                                                                                                                       |
| 1019 | 1r13A<br>(145) | 167-180 (14),<br>186-212 (27) | 167-178 (12),<br>192-211 (20) | 172-176 (5),<br>192-203 (12)  | M | 0.52 | 1.79 | 90.40%<br>(113/125) | 16.80%<br>(21/125) |  <p>Pulmonary surfactant-associated<br/>protein a<br/>Bitiscetin alpha chain</p> |
|      | 1uexA<br>(125) | 68-83 (16),<br>89-111 (23)    | 68-81 (14),<br>95-110 (16)    | 172-176 (5),<br>192-203 (12)  |   |      |      |                     |                    |                                                                                                                                                                       |

|      |                |                               |                               |                              |   |      |      |                     |                    |                                                                                                                                                                                        |
|------|----------------|-------------------------------|-------------------------------|------------------------------|---|------|------|---------------------|--------------------|----------------------------------------------------------------------------------------------------------------------------------------------------------------------------------------|
| 1020 | 1r13A<br>(145) | 168-180 (13),<br>192-224 (33) | 168-178 (11),<br>192-211 (20) | 171-178 (8),<br>192-203 (12) | M | 0.52 | 1.88 | 92.68%<br>(114/123) | 17.07%<br>(21/123) |  <p>Pulmonary surfactant-associated protein a<br/>Coagulation factor IX-binding protein B chain</p> |
|      | 1j34B<br>(123) | 267-279 (13),<br>291-317 (27) | 267-277 (11),<br>291-304 (14) | 171-178 (8),<br>192-203 (12) |   |      |      |                     |                    |                                                                                                                                                                                        |
| 1021 | 1r13A<br>(145) | 159-180 (22),<br>190-205 (16) | 169-178 (10),<br>191-204 (14) | 171-178 (8),<br>193-203 (11) | M | 0.53 | 1.85 | 92.68%<br>(114/123) | 15.45%<br>(19/123) |  <p>Pulmonary surfactant-associated protein a<br/>Platelet aggregation inducer</p>                  |
|      | 1jwiB<br>(123) | 58-81 (24),<br>91-99 (9)      | 70-79 (10),<br>92-98 (7)      | 171-178 (8),<br>193-203 (11) |   |      |      |                     |                    |                                                                                                                                                                                        |
| 1022 | 1r13A<br>(145) | 155-180 (26),<br>183-218 (36) | 167-178 (12),<br>192-207 (16) | 170-176 (7),<br>192-203 (12) | M | 0.49 | 2.01 | 90.40%<br>(113/125) | 19.20%<br>(24/125) |  <p>Pulmonary surfactant-associated protein a<br/>Mucroctin beta chain</p>                        |
|      | 1v4iB<br>(125) | 254-281 (28),<br>284-313 (30) | 268-279 (12),<br>293-301 (9)  | 170-176 (7),<br>192-203 (12) |   |      |      |                     |                    |                                                                                                                                                                                        |

|      |                |                               |                              |                              |   |      |      |                     |                    |                                                                                                                                                                                                                                                                             |
|------|----------------|-------------------------------|------------------------------|------------------------------|---|------|------|---------------------|--------------------|-----------------------------------------------------------------------------------------------------------------------------------------------------------------------------------------------------------------------------------------------------------------------------|
| 1023 | 1r13A<br>(145) | 167-179 (13),<br>192-218 (27) | 172-177 (6),<br>193-218 (26) | 172-177 (6),<br>193-202 (10) | M | 0.51 | 1.94 | 89.92%<br>(116/129) | 18.60%<br>(24/129) |  <br>Pulmonary surfactant-associated<br>protein a<br>Coagulation factor X binding protein             |
|      | 1iodA<br>(129) | 68-82 (15),<br>95-119 (25)    | 73-80 (8),<br>96-119 (24)    | 172-177 (6),<br>193-202 (10) |   |      |      |                     |                    |                                                                                                                                                                                                                                                                             |
| 1024 | 1r13A<br>(145) | 167-179 (13),<br>192-220 (29) | 172-178 (7),<br>192-204 (13) | 172-178 (7),<br>193-201 (9)  | M | 0.51 | 1.84 | 89.15%<br>(115/129) | 19.38%<br>(25/129) |  <br>Pulmonary surfactant-associated<br>protein a<br>Coagulation factor IX-binding protein<br>a chain |
|      | 1j34A<br>(129) | 68-82 (15),<br>95-121 (27)    | 73-81 (9),<br>95-102 (8)     | 172-178 (7),<br>193-201 (9)  |   |      |      |                     |                    |                                                                                                                                                                                                                                                                             |
| 1025 | 1tdqB<br>(126) | 51-72 (22),<br>79-112 (34)    | 53-71 (19),<br>80-101 (22)   | 65-71 (7),<br>84-98 (15)     | M | 0.67 | 1.36 | 91.06%<br>(112/123) | 29.27%<br>(36/123) |  <br>Aggrecan core protein<br>Echicetin B-chain                                                   |
|      | 1oz7B<br>(123) | 52-78 (27),<br>85-108 (24)    | 54-77 (24),<br>86-98 (13)    | 65-71 (7),<br>84-98 (15)     |   |      |      |                     |                    |                                                                                                                                                                                                                                                                             |

|      |                |                            |                           |                          |   |      |      |                     |                    |                                                                                                                                               |
|------|----------------|----------------------------|---------------------------|--------------------------|---|------|------|---------------------|--------------------|-----------------------------------------------------------------------------------------------------------------------------------------------|
| 1026 | ltdqB<br>(126) | 61-69 (9),<br>79-100 (22)  | 62-69 (8),<br>81-98 (18)  | 62-69 (8),<br>91-98 (8)  | M | 0.62 | 1.54 | 89.52%<br>(111/124) | 32.26%<br>(40/124) | 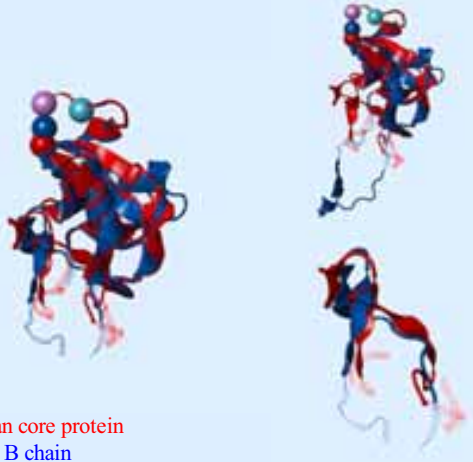 <p>Aggrecan core protein<br/>EMS16 B chain</p>             |
|      | lukmB<br>(124) | 66-74 (9),<br>84-96 (13)   | 67-74 (8),<br>85-94 (10)  | 62-69 (8),<br>91-98 (8)  |   |      |      |                     |                    |                                                                                                                                               |
| 1027 | ltdqB<br>(126) | 61-73 (13),<br>87-108 (22) | 64-73 (10),<br>87-97 (11) | 66-71 (6),<br>89-97 (9)  | M | 0.68 | 1.38 | 92.86%<br>(117/126) | 30.95%<br>(39/126) |  <p>Aggrecan core protein<br/>EMS16 a chain</p>           |
|      | lukmA<br>(131) | 71-85 (15),<br>99-114 (16) | 74-85 (12),<br>99-102 (4) | 66-71 (6),<br>89-97 (9)  |   |      |      |                     |                    |                                                                                                                                               |
| 1028 | ltdqB<br>(126) | 61-73 (13),<br>80-109 (30) | 61-73 (13),<br>80-97 (18) | 64-71 (8),<br>84-93 (10) | M | 0.62 | 1.77 | 92.00%<br>(115/125) | 35.20%<br>(44/125) |  <p>Aggrecan core protein<br/>Bitiscetin alpha chain</p> |
|      | luexA<br>(125) | 69-83 (15),<br>90-111 (22) | 69-83 (15),<br>90-98 (9)  | 64-71 (8),<br>84-93 (10) |   |      |      |                     |                    |                                                                                                                                               |

|      |                |                               |                               |                          |   |      |      |                     |                    |                                                                                                                                                                             |
|------|----------------|-------------------------------|-------------------------------|--------------------------|---|------|------|---------------------|--------------------|-----------------------------------------------------------------------------------------------------------------------------------------------------------------------------|
| 1029 | ltdqB<br>(126) | 61-70 (10),<br>80-98 (19)     | 61-70 (10),<br>80-98 (19)     | 64-69 (6),<br>84-98 (15) | M | 0.68 | 1.36 | 91.87%<br>(113/123) | 32.52%<br>(40/123) |        |
|      | ljwiB<br>(123) | 69-78 (10),<br>88-97 (10)     | 69-78 (10),<br>88-97 (10)     | 64-69 (6),<br>84-98 (15) |   |      |      |                     |                    |                                                                                                                                                                             |
| 1030 | ltdqB<br>(126) | 53-70 (18),<br>76-109 (34)    | 55-69 (15),<br>81-109 (29)    | 62-69 (8),<br>81-97 (17) | M | 0.64 | 1.59 | 91.20%<br>(114/125) | 28.80%<br>(36/125) |       |
|      | 1v4lB<br>(125) | 256-278 (23),<br>284-307 (24) | 258-277 (20),<br>288-307 (20) | 62-69 (8),<br>81-97 (17) |   |      |      |                     |                    |                                                                                                                                                                             |
| 1031 | ltdqB<br>(126) | 62-76 (15),<br>80-103 (24)    | 64-72 (9),<br>85-98 (14)      | 66-70 (5),<br>86-96 (11) | M | 0.68 | 1.43 | 92.06%<br>(116/126) | 31.75%<br>(40/126) |   |
|      | liodA<br>(129) | 70-86 (17),<br>90-106 (17)    | 72-82 (11),<br>95-101 (7)     | 66-70 (5),<br>86-96 (11) |   |      |      |                     |                    |                                                                                                                                                                             |



|      |                |                               |                               |                               |   |      |      |                     |                    |                                                                                                                                                                                                                                                          |
|------|----------------|-------------------------------|-------------------------------|-------------------------------|---|------|------|---------------------|--------------------|----------------------------------------------------------------------------------------------------------------------------------------------------------------------------------------------------------------------------------------------------------|
| 1032 | 1tdqB<br>(126) | 63-73 (11),<br>82-108 (27)    | 64-71 (8),<br>82-108 (27)     | 64-70 (7),<br>90-96 (7)       | M | 0.61 | 1.55 | 90.48%<br>(114/126) | 28.57%<br>(36/126) |  <br>Aggregan core protein<br>Convulxin alpha                                        |
|      | 1uosA<br>(133) | 71-83 (13),<br>92-112 (21)    | 72-80 (9),<br>92-112 (21)     | 64-70 (7),<br>90-96 (7)       |   |      |      |                     |                    |                                                                                                                                                                                                                                                          |
| 1033 | 1tdqB<br>(126) | 64-73 (10),<br>80-98 (19)     | 64-71 (8),<br>85-98 (14)      | 64-71 (8),<br>86-96 (11)      | M | 0.67 | 1.51 | 92.86%<br>(117/126) | 34.92%<br>(44/126) |  <br>Aggregan core protein<br>Coagulation factor IX-binding protein<br>alpha chain |
|      | 1j34A<br>(129) | 72-83 (12),<br>90-101 (12)    | 72-80 (9),<br>95-101 (7)      | 64-71 (8),<br>86-96 (11)      |   |      |      |                     |                    |                                                                                                                                                                                                                                                          |
| 1034 | 3bc7C<br>(128) | 244-280 (37),<br>284-307 (24) | 253-280 (28),<br>284-296 (13) | 255-264 (10),<br>284-295 (12) | M | 0.56 | 1.75 | 88.62%<br>(109/123) | 26.02%<br>(32/123) |  <br>C-type lectin domain family 4<br>member K<br>Echicetin B-chain            |
|      | 1oz7B<br>(123) | 53-89 (37),<br>92-107 (16)    | 66-89 (24),<br>92-97 (6)      | 255-264 (10),<br>284-295 (12) |   |      |      |                     |                    |                                                                                                                                                                                                                                                          |

|      |                |                               |                               |                              |   |      |      |                     |                    |                                                                                                                                                                                                                                                                                     |
|------|----------------|-------------------------------|-------------------------------|------------------------------|---|------|------|---------------------|--------------------|-------------------------------------------------------------------------------------------------------------------------------------------------------------------------------------------------------------------------------------------------------------------------------------|
| 1035 | 3bc7C<br>(128) | 255-266 (12),<br>274-308 (35) | 255-263 (9),<br>274-306 (33)  | 256-263 (8),<br>287-294 (8)  | M | 0.59 | 1.60 | 88.71%<br>(110/124) | 25.81%<br>(32/124) | 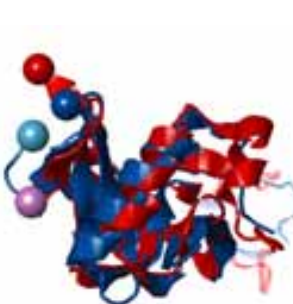  <p>C-type lectin domain family 4<br/>member K<br/>EMS16 B chain</p>                                           |
|      | lukmB<br>(124) | 67-78 (12),<br>85-109 (25)    | 67-75 (9),<br>85-107 (23)     | 256-263 (8),<br>287-294 (8)  |   |      |      |                     |                    |                                                                                                                                                                                                                                                                                     |
| 1036 | 3bc7C<br>(128) | 255-266 (12),<br>274-292 (19) | 257-266 (10),<br>274-292 (19) | 258-265 (8),<br>287-292 (6)  | M | 0.55 | 1.89 | 89.06%<br>(114/128) | 22.66%<br>(29/128) |   <p>C-type lectin domain family 4<br/>member K<br/>EMS16 a chain</p>                                         |
|      | lukmA<br>(131) | 72-85 (14),<br>92-101 (10)    | 74-85 (12),<br>92-101 (10)    | 258-265 (8),<br>287-292 (6)  |   |      |      |                     |                    |                                                                                                                                                                                                                                                                                     |
| 1037 | 3bc7C<br>(128) | 254-266 (13),<br>272-309 (38) | 255-263 (9),<br>272-294 (23)  | 257-263 (7),<br>273-294 (22) | M | 0.59 | 1.72 | 90.24%<br>(111/123) | 24.39%<br>(30/123) |   <p>C-type lectin domain family 4<br/>member K<br/>Coagulation factor IX-binding protein<br/>B chain</p> |
|      | lj34B<br>(123) | 267-279 (13),<br>285-309 (25) | 268-276 (9),<br>285-295 (11)  | 257-263 (7),<br>273-294 (22) |   |      |      |                     |                    |                                                                                                                                                                                                                                                                                     |

|      |                |                               |                               |                              |   |      |      |                     |                    |                                                                                                                                                                                  |
|------|----------------|-------------------------------|-------------------------------|------------------------------|---|------|------|---------------------|--------------------|----------------------------------------------------------------------------------------------------------------------------------------------------------------------------------|
| 1038 | 3bc7C<br>(128) | 253-266 (14),<br>270-294 (25) | 254-265 (12),<br>270-294 (25) | 257-263 (7),<br>287-294 (8)  | M | 0.57 | 1.80 | 90.24%<br>(111/123) | 27.64%<br>(34/123) |  <p>C-type lectin domain family 4<br/>member K<br/>Platelet aggregation inducer</p>           |
|      | 1jwiB<br>(123) | 68-81 (14),<br>84-97 (14)     | 69-80 (12),<br>84-97 (14)     | 257-263 (7),<br>287-294 (8)  |   |      |      |                     |                    |                                                                                                                                                                                  |
| 1039 | 3bc7C<br>(128) | 242-266 (25),<br>272-313 (42) | 255-266 (12),<br>272-306 (35) | 255-261 (7),<br>285-294 (10) | M | 0.58 | 1.62 | 87.20%<br>(109/125) | 22.40%<br>(28/125) |  <p>C-type lectin domain family 4<br/>member K<br/>Mucroctin beta chain</p>                   |
|      | 1v41B<br>(125) | 253-281 (29),<br>287-315 (29) | 270-281 (12),<br>287-308 (22) | 255-261 (7),<br>285-294 (10) |   |      |      |                     |                    |                                                                                                                                                                                  |
| 1040 | 3bc7C<br>(128) | 255-287 (33),<br>261-292 (32) | 258-266 (9),<br>269-292 (24)  | 258-264 (7),<br>287-292 (6)  | M | 0.55 | 1.85 | 87.50%<br>(112/128) | 22.66%<br>(29/128) |  <p>C-type lectin domain family 4<br/>member K<br/>Coagulation factor X binding protein</p> |
|      | 1iodA<br>(129) | 70-96 (27),<br>75-99 (25)     | 73-83 (11),<br>86-99 (14)     | 258-264 (7),<br>287-292 (6)  |   |      |      |                     |                    |                                                                                                                                                                                  |

|      |                |                               |                               |                             |   |      |      |                     |                    |                                                                                                                                                                                              |
|------|----------------|-------------------------------|-------------------------------|-----------------------------|---|------|------|---------------------|--------------------|----------------------------------------------------------------------------------------------------------------------------------------------------------------------------------------------|
| 1041 | 3bc7C<br>(128) | 258-288 (31),<br>262-308 (47) | 258-288 (31),<br>262-292 (31) | 258-265 (8),<br>287-292 (6) | M | 0.46 | 1.77 | 88.28%<br>(113/128) | 20.31%<br>(26/128) |  <p>C-type lectin domain family 4<br/>member K<br/>Convulxin alpha</p>                                     |
|      | 1uosA<br>(133) | 73-96 (24),<br>76-116 (41)    | 73-96 (24),<br>76-99 (24)     | 258-265 (8),<br>287-292 (6) |   |      |      |                     |                    |                                                                                                                                                                                              |
| 1042 | 3bc7C<br>(128) | 257-289 (33),<br>261-293 (33) | 258-289 (32),<br>261-292 (32) | 258-266 (9),<br>287-292 (6) | M | 0.42 | 1.79 | 85.94%<br>(110/128) | 21.88%<br>(28/128) |  <p>C-type lectin domain family 4<br/>member K<br/>Coagulation factor IX-binding protein<br/>a chain</p> |
|      | 1j34A<br>(129) | 72-97 (26),<br>75-100 (26)    | 73-97 (25),<br>75-99 (25)     | 258-266 (9),<br>287-292 (6) |   |      |      |                     |                    |                                                                                                                                                                                              |
| 1043 | 1byfA<br>(123) | 44-68 (25),<br>75-100 (26)    | 57-68 (12),<br>75-98 (24)     | 58-66 (9),<br>88-95 (8)     | M | 0.53 | 1.81 | 85.37%<br>(105/123) | 21.14%<br>(26/123) |  <p>Protein (polyandrocampa lectin)<br/>Echicetin B-chain</p>                                           |
|      | 1oz7B<br>(123) | 53-78 (26),<br>85-100 (16)    | 68-78 (11),<br>85-98 (14)     | 58-66 (9),<br>88-95 (8)     |   |      |      |                     |                    |                                                                                                                                                                                              |

|      |                |                            |                            |                          |   |      |      |                     |                    |                                                                                                                                                         |
|------|----------------|----------------------------|----------------------------|--------------------------|---|------|------|---------------------|--------------------|---------------------------------------------------------------------------------------------------------------------------------------------------------|
| 1044 | lbyfA<br>(123) | 56-66 (11),<br>72-94 (23)  | 56-66 (11),<br>76-92 (17)  | 58-64 (7),<br>88-92 (5)  | M | 0.51 | 1.96 | 85.37%<br>(105/123) | 12.20%<br>(15/123) | 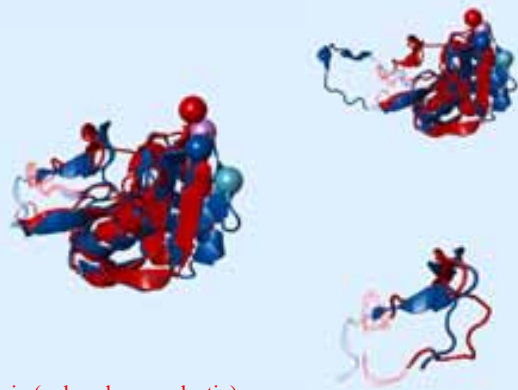 <p>Protein (polyandrocampa lectin)<br/>EMS16 B chain</p>            |
|      | lukmB<br>(124) | 66-75 (10),<br>81-93 (13)  | 66-75 (10),<br>85-91 (7)   | 58-64 (7),<br>88-92 (5)  |   |      |      |                     |                    |                                                                                                                                                         |
| 1045 | lbyfA<br>(123) | 56-68 (13),<br>85-95 (11)  | 56-67 (12),<br>85-95 (11)  | 61-67 (7),<br>86-95 (10) | M | 0.54 | 1.88 | 89.43%<br>(110/123) | 16.26%<br>(20/123) |  <p>Protein (polyandrocampa lectin)<br/>EMS16 a chain</p>            |
|      | lukmA<br>(131) | 71-84 (14),<br>99-103 (5)  | 71-83 (13),<br>99-103 (5)  | 61-67 (7),<br>86-95 (10) |   |      |      |                     |                    |                                                                                                                                                         |
| 1046 | lbyfA<br>(123) | 56-69 (14),<br>73-117 (45) | 59-69 (11),<br>73-99 (27)  | 60-64 (5),<br>88-93 (6)  | M | 0.53 | 1.95 | 87.80%<br>(108/123) | 14.63%<br>(18/123) |  <p>Protein (polyandrocampa lectin)<br/>Bitiscetin alpha chain</p> |
|      | luexA<br>(125) | 69-83 (15),<br>86-123 (38) | 72-83 (12),<br>86-103 (18) | 60-64 (5),<br>88-93 (6)  |   |      |      |                     |                    |                                                                                                                                                         |

|      |                |                               |                              |                          |   |      |      |                     |                    |                                                                                                                                                                                  |
|------|----------------|-------------------------------|------------------------------|--------------------------|---|------|------|---------------------|--------------------|----------------------------------------------------------------------------------------------------------------------------------------------------------------------------------|
| 1047 | 1byfA<br>(123) | 56-65 (10),<br>75-94 (20)     | 57-65 (9),<br>76-94 (19)     | 59-65 (7),<br>76-94 (19) | M | 0.51 | 2.10 | 86.99%<br>(107/123) | 18.70%<br>(23/123) | 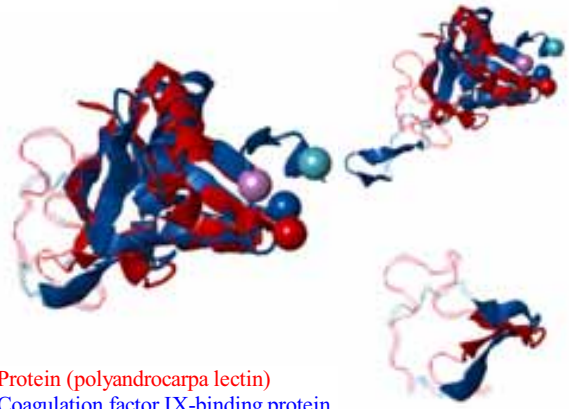 <p>Protein (polyandrocarpa lectin)<br/>Coagulation factor IX-binding protein<br/>B chain</p> |
|      | 1j34B<br>(123) | 267-274 (8),<br>285-294 (10)  | 268-274 (7),<br>286-294 (9)  | 59-65 (7),<br>76-94 (19) |   |      |      |                     |                    |                                                                                                                                                                                  |
| 1048 | 1byfA<br>(123) | 56-66 (11),<br>73-94 (22)     | 59-65 (7),<br>76-94 (19)     | 59-65 (7),<br>88-93 (6)  | M | 0.52 | 1.95 | 86.18%<br>(106/123) | 15.45%<br>(19/123) |  <p>Protein (polyandrocarpa lectin)<br/>Platelet aggregation inducer</p>                     |
|      | 1jwiB<br>(123) | 69-78 (10),<br>85-96 (12)     | 72-75 (4),<br>88-96 (9)      | 59-65 (7),<br>88-93 (6)  |   |      |      |                     |                    |                                                                                                                                                                                  |
| 1049 | 1byfA<br>(123) | 56-78 (23),<br>81-114 (34)    | 56-78 (23),<br>92-94 (3)     | 58-64 (7),<br>92-93 (2)  | M | 0.45 | 2.46 | 87.80%<br>(108/123) | 17.07%<br>(21/123) |  <p>Protein (polyandrocarpa lectin)<br/>Mucroctin beta chain</p>                            |
|      | 1v4iB<br>(125) | 269-280 (12),<br>283-316 (34) | 269-280 (12),<br>294-296 (3) | 58-64 (7),<br>92-93 (2)  |   |      |      |                     |                    |                                                                                                                                                                                  |

|      |                |                            |                            |                          |   |      |      |                     |                    |                                                                                                                                                                                        |
|------|----------------|----------------------------|----------------------------|--------------------------|---|------|------|---------------------|--------------------|----------------------------------------------------------------------------------------------------------------------------------------------------------------------------------------|
| 1050 | lbyfA<br>(123) | 56-68 (13),<br>71-95 (25)  | 56-68 (13),<br>76-95 (20)  | 61-67 (7),<br>84-95 (12) | M | 0.53 | 1.89 | 87.80%<br>(108/123) | 16.26%<br>(20/123) |  <p>Protein (polyandrocarpa lectin)<br/>Coagulation factor X binding protein</p>                     |
|      | liodA<br>(129) | 69-82 (14),<br>85-101 (17) | 69-82 (14),<br>90-101 (12) | 61-67 (7),<br>84-95 (12) |   |      |      |                     |                    |                                                                                                                                                                                        |
| 1051 | lbyfA<br>(123) | 56-69 (14),<br>76-100 (25) | 56-67 (12),<br>84-100 (17) | 59-64 (6),<br>84-96 (13) | M | 0.50 | 2.04 | 88.62%<br>(109/123) | 14.63%<br>(18/123) |  <p>Protein (polyandrocarpa lectin)<br/>Convulxin alpha</p>                                        |
|      | luosA<br>(133) | 69-83 (15),<br>90-106 (17) | 69-81 (13),<br>96-106 (11) | 59-64 (6),<br>84-96 (13) |   |      |      |                     |                    |                                                                                                                                                                                        |
| 1052 | lbyfA<br>(123) | 56-68 (13),<br>76-95 (20)  | 56-67 (12),<br>76-95 (20)  | 59-67 (9),<br>76-95 (20) | M | 0.51 | 2.01 | 87.80%<br>(108/123) | 13.82%<br>(17/123) |  <p>Protein (polyandrocarpa lectin)<br/>Coagulation factor IX-binding protein<br/>alpha chain</p> |
|      | lj34A<br>(129) | 69-82 (14),<br>90-101 (12) | 69-81 (13),<br>90-101 (12) | 59-67 (9),<br>76-95 (20) |   |      |      |                     |                    |                                                                                                                                                                                        |

|      |                |                               |                               |                              |   |      |      |                     |                    |                                                                                                                                           |
|------|----------------|-------------------------------|-------------------------------|------------------------------|---|------|------|---------------------|--------------------|-------------------------------------------------------------------------------------------------------------------------------------------|
| 1053 | lkza1<br>(115) | 142-182 (41),<br>185-210 (26) | 165-175 (11),<br>185-210 (26) | 167-173 (7),<br>188-200 (13) | M | 0.60 | 1.68 | 92.17%<br>(106/115) | 19.13%<br>(22/115) |  <p>Mannose-binding protein C<br/>Echicetin B-chain</p> |
|      | loz7B<br>(123) | 41-86 (46),<br>89-107 (19)    | 69-79 (11),<br>89-107 (19)    | 167-173 (7),<br>188-200 (13) |   |      |      |                     |                    |                                                                                                                                           |
| 1054 | lkza1<br>(115) | 163-172 (10),<br>175-211 (37) | 163-172 (10),<br>185-201 (17) | 165-172 (8),<br>187-199 (13) | M | 0.61 | 1.64 | 92.17%<br>(106/115) | 16.52%<br>(19/115) |  <p>Mannose-binding protein C<br/>EMS16 B chain</p>   |
|      | lukmB<br>(124) | 66-75 (10),<br>78-109 (32)    | 66-75 (10),<br>88-96 (9)      | 165-172 (8),<br>187-199 (13) |   |      |      |                     |                    |                                                                                                                                           |
| 1055 | lkza1<br>(115) | 163-182 (20),<br>189-207 (19) | 164-176 (13),<br>189-197 (9)  | 168-174 (7),<br>189-197 (9)  | M | 0.63 | 1.34 | 93.04%<br>(107/115) | 22.61%<br>(26/115) |  <p>Mannose-binding protein C<br/>EMS16 a chain</p>  |
|      | lukmA<br>(131) | 71-92 (22),<br>99-114 (16)    | 72-86 (15),<br>99-101 (3)     | 168-174 (7),<br>189-197 (9)  |   |      |      |                     |                    |                                                                                                                                           |



|      |                |                               |                               |                              |   |      |      |                     |                    |                                                                                                                                                                             |
|------|----------------|-------------------------------|-------------------------------|------------------------------|---|------|------|---------------------|--------------------|-----------------------------------------------------------------------------------------------------------------------------------------------------------------------------|
| 1056 | lkza1<br>(115) | 166-186 (21),<br>171-208 (38) | 166-175 (10),<br>186-197 (12) | 168-173 (6),<br>186-197 (12) | M | 0.61 | 1.53 | 91.30%<br>(105/115) | 19.13%<br>(22/115) | 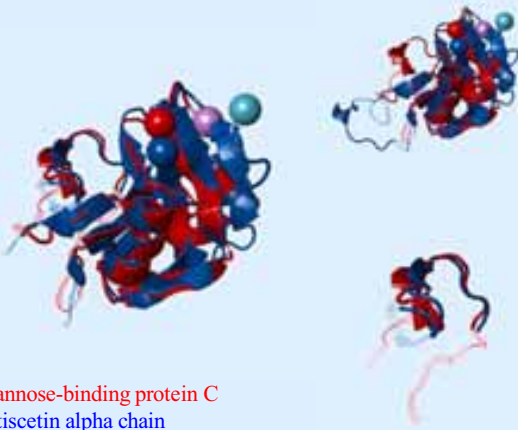 <p>Mannose-binding protein C<br/>Bitiscetin alpha chain</p>                             |
|      | luexA<br>(125) | 72-94 (23),<br>79-111 (33)    | 72-83 (12),<br>94-97 (4)      | 168-173 (6),<br>186-197 (12) |   |      |      |                     |                    |                                                                                                                                                                             |
| 1057 | lkza1<br>(115) | 166-172 (7),<br>186-212 (27)  | 166-172 (7),<br>186-207 (22)  | 166-171 (6),<br>186-199 (14) | M | 0.59 | 1.68 | 91.30%<br>(105/115) | 17.39%<br>(20/115) |  <p>Mannose-binding protein C<br/>Coagulation factor IX-binding protein<br/>B chain</p> |
|      | lj34B<br>(123) | 270-276 (7),<br>290-309 (20)  | 270-276 (7),<br>290-304 (15)  | 166-171 (6),<br>186-199 (14) |   |      |      |                     |                    |                                                                                                                                                                             |
| 1058 | lkza1<br>(115) | 166-172 (7),<br>185-200 (16)  | 166-172 (7),<br>186-199 (14)  | 166-172 (7),<br>190-199 (10) | M | 0.59 | 1.69 | 91.30%<br>(105/115) | 16.52%<br>(19/115) |  <p>Mannose-binding protein C<br/>Platelet aggregation inducer</p>                     |
|      | ljwiB<br>(123) | 72-78 (7),<br>91-98 (8)       | 72-78 (7),<br>92-97 (6)       | 166-172 (7),<br>190-199 (10) |   |      |      |                     |                    |                                                                                                                                                                             |

|      |                |                               |                               |                              |   |      |      |                     |                    |                                                                                                                                                               |
|------|----------------|-------------------------------|-------------------------------|------------------------------|---|------|------|---------------------|--------------------|---------------------------------------------------------------------------------------------------------------------------------------------------------------|
| 1059 | lkza1<br>(115) | 154-176 (23),<br>179-208 (30) | 163-172 (10),<br>187-207 (21) | 166-172 (7),<br>187-199 (13) | M | 0.62 | 1.56 | 92.17%<br>(106/115) | 17.39%<br>(20/115) | 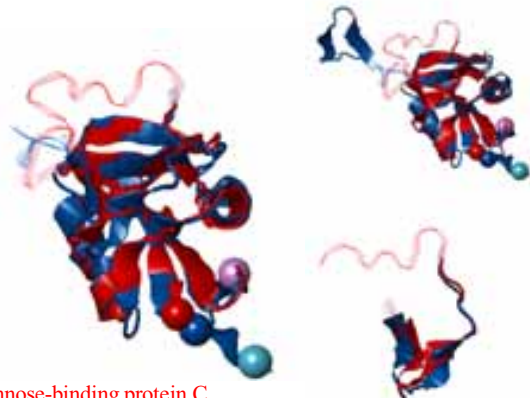 <p>Mannose-binding protein C<br/>Mucroctein beta chain</p>                |
|      | lv4IB<br>(125) | 255-282 (28),<br>285-307 (23) | 269-278 (10),<br>293-306 (14) | 166-172 (7),<br>187-199 (13) |   |      |      |                     |                    |                                                                                                                                                               |
| 1060 | lkza1<br>(115) | 163-183 (21),<br>187-210 (24) | 163-175 (13),<br>188-210 (23) | 168-172 (5),<br>188-196 (9)  | M | 0.61 | 1.53 | 93.04%<br>(107/115) | 17.39%<br>(20/115) |  <p>Mannose-binding protein C<br/>Coagulation factor X binding protein</p> |
|      | liodA<br>(129) | 69-91 (23),<br>95-115 (21)    | 69-83 (15),<br>96-115 (20)    | 168-172 (5),<br>188-196 (9)  |   |      |      |                     |                    |                                                                                                                                                               |
| 1061 | lkza1<br>(115) | 162-185 (24),<br>188-208 (21) | 163-175 (13),<br>188-207 (20) | 166-171 (6),<br>188-196 (9)  | M | 0.60 | 1.36 | 91.30%<br>(105/115) | 15.65%<br>(18/115) |  <p>Mannose-binding protein C<br/>Convulxin alpha</p>                    |
|      | luosA<br>(133) | 68-93 (26),<br>96-113 (18)    | 69-83 (15),<br>96-112 (17)    | 166-171 (6),<br>188-196 (9)  |   |      |      |                     |                    |                                                                                                                                                               |

|      |                |                               |                               |                              |   |      |      |                     |                    |                                                                                                                                                                                |
|------|----------------|-------------------------------|-------------------------------|------------------------------|---|------|------|---------------------|--------------------|--------------------------------------------------------------------------------------------------------------------------------------------------------------------------------|
| 1062 | 1kza1<br>(115) | 163-181 (19),<br>187-199 (13) | 163-175 (13),<br>187-198 (12) | 166-173 (8),<br>188-198 (11) | M | 0.61 | 1.53 | 93.04%<br>(107/115) | 20.87%<br>(24/115) | 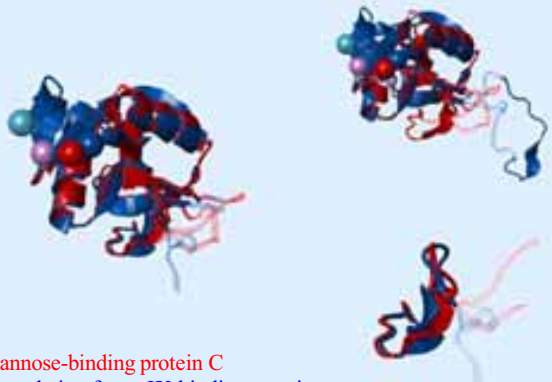 <p>Mannose-binding protein C<br/>Coagulation factor IX-binding protein<br/>alpha chain</p> |
|      | 1j34A<br>(129) | 69-89 (21),<br>95-101 (7)     | 69-83 (15),<br>95-100 (6)     | 166-173 (8),<br>188-198 (11) |   |      |      |                     |                    |                                                                                                                                                                                |
| 1063 | lyttA<br>(115) | 137-169 (33),<br>180-205 (26) | 160-169 (10),<br>180-196 (17) | 160-168 (9),<br>183-194 (12) | M | 0.55 | 1.75 | 92.17%<br>(106/115) | 19.13%<br>(22/115) |  <p>Mannose-binding protein a<br/>Echicetin B-chain</p>                                     |
|      | 1oz7B<br>(123) | 41-78 (38),<br>89-107 (19)    | 69-78 (10),<br>89-97 (9)      | 160-168 (9),<br>183-194 (12) |   |      |      |                     |                    |                                                                                                                                                                                |
| 1064 | lyttA<br>(115) | 157-166 (10),<br>180-206 (27) | 158-166 (9),<br>180-196 (17)  | 159-166 (8),<br>182-194 (13) | M | 0.56 | 1.80 | 90.43%<br>(104/115) | 17.39%<br>(20/115) |  <p>Mannose-binding protein a<br/>EMS16 B chain</p>                                       |
|      | lukmB<br>(124) | 65-74 (10),<br>88-109 (22)    | 66-74 (9),<br>88-96 (9)       | 159-166 (8),<br>182-194 (13) |   |      |      |                     |                    |                                                                                                                                                                                |

|      |                |                               |                               |                              |   |      |      |                     |                    |                                                                                                                                                                             |
|------|----------------|-------------------------------|-------------------------------|------------------------------|---|------|------|---------------------|--------------------|-----------------------------------------------------------------------------------------------------------------------------------------------------------------------------|
| 1065 | lyttA<br>(115) | 158-170 (13),<br>184-202 (19) | 158-168 (11),<br>184-193 (10) | 163-168 (6),<br>184-192 (9)  | M | 0.59 | 1.61 | 93.04%<br>(107/115) | 19.13%<br>(22/115) |  <p>Mannose-binding protein a<br/>EMS16 a chain</p>                                      |
|      | lukmA<br>(131) | 71-85 (15),<br>99-114 (16)    | 71-82 (12),<br>99-102 (4)     | 163-168 (6),<br>184-192 (9)  |   |      |      |                     |                    |                                                                                                                                                                             |
| 1066 | lyttA<br>(115) | 158-167 (10),<br>182-207 (26) | 161-167 (7),<br>182-207 (26)  | 161-167 (7),<br>182-194 (13) | M | 0.59 | 1.74 | 92.17%<br>(106/115) | 17.39%<br>(20/115) |  <p>Mannose-binding protein a<br/>Coagulation factor IX-binding protein<br/>B chain</p> |
|      | lj34B<br>(123) | 267-276 (10),<br>291-309 (19) | 270-276 (7),<br>291-309 (19)  | 161-167 (7),<br>182-194 (13) |   |      |      |                     |                    |                                                                                                                                                                             |
| 1067 | lyttA<br>(115) | 158-167 (10),<br>173-195 (23) | 161-167 (7),<br>173-194 (22)  | 161-166 (6),<br>177-194 (18) | M | 0.53 | 2.05 | 91.30%<br>(105/115) | 15.65%<br>(18/115) |  <p>Mannose-binding protein a<br/>Platelet aggregation inducer</p>                     |
|      | ljwiB<br>(123) | 69-78 (10),<br>84-98 (15)     | 72-78 (7),<br>84-97 (14)      | 161-166 (6),<br>177-194 (18) |   |      |      |                     |                    |                                                                                                                                                                             |

|      |                |                               |                               |                              |   |      |      |                     |                    |                                                                                                                                                                |
|------|----------------|-------------------------------|-------------------------------|------------------------------|---|------|------|---------------------|--------------------|----------------------------------------------------------------------------------------------------------------------------------------------------------------|
| 1068 | lyttA<br>(115) | 148-167 (20),<br>179-203 (25) | 158-167 (10),<br>182-203 (22) | 161-167 (7),<br>182-194 (13) | M | 0.59 | 1.72 | 92.17%<br>(106/115) | 16.52%<br>(19/115) |  <p>Mannose-binding protein a<br/>Mucroctin beta chain</p>                  |
|      | lv4IB<br>(125) | 254-278 (25),<br>290-307 (18) | 269-278 (10),<br>293-307 (15) | 161-167 (7),<br>182-194 (13) |   |      |      |                     |                    |                                                                                                                                                                |
| 1069 | lyttA<br>(115) | 158-169 (12),<br>182-207 (26) | 158-169 (12),<br>182-205 (24) | 163-167 (5),<br>183-193 (11) | M | 0.57 | 1.69 | 92.17%<br>(106/115) | 12.17%<br>(14/115) |  <p>Mannose-binding protein a<br/>Coagulation factor X binding protein</p> |
|      | liodA<br>(129) | 69-82 (14),<br>95-117 (23)    | 69-82 (14),<br>95-115 (21)    | 163-167 (5),<br>183-193 (11) |   |      |      |                     |                    |                                                                                                                                                                |
| 1070 | lyttA<br>(115) | 157-170 (14),<br>183-202 (20) | 158-168 (11),<br>183-202 (20) | 161-166 (6),<br>183-191 (9)  | M | 0.56 | 1.80 | 93.91%<br>(108/115) | 14.78%<br>(17/115) |  <p>Mannose-binding protein a<br/>Convulxin alpha</p>                     |
|      | luosA<br>(133) | 68-83 (16),<br>96-112 (17)    | 69-81 (13),<br>96-112 (17)    | 161-166 (6),<br>183-191 (9)  |   |      |      |                     |                    |                                                                                                                                                                |

|      |                |                               |                               |                              |   |      |      |                     |                    |                                                                                                                                                                        |
|------|----------------|-------------------------------|-------------------------------|------------------------------|---|------|------|---------------------|--------------------|------------------------------------------------------------------------------------------------------------------------------------------------------------------------|
| 1071 | lyttA<br>(115) | 158-169 (12),<br>182-195 (14) | 158-168 (11),<br>182-194 (13) | 161-168 (8),<br>183-193 (11) | M | 0.58 | 1.59 | 91.30%<br>(105/115) | 14.78%<br>(17/115) |  <p>Mannose-binding protein a<br/>Coagulation factor IX-binding protein a chain</p> |
|      | 1j34A<br>(129) | 69-82 (14),<br>95-102 (8)     | 69-81 (13),<br>95-101 (7)     | 161-168 (8),<br>183-193 (11) |   |      |      |                     |                    |                                                                                                                                                                        |
| 1072 | 2cw1A<br>(65)  | 42-64 (23)                    | 51-64 (14)                    | 54-58 (5)                    | C | 0.57 | 2.11 | 95.08%<br>(58/61)   | 19.67%<br>(12/61)  |  <p>SN4m<br/>Lambda CRO repressor</p>                                               |
|      | 1d11A<br>(61)  | 42-60 (19)                    | 51-60 (10)                    | 54-58 (5)                    |   |      |      |                     |                    |                                                                                                                                                                        |
| 1073 | 2cw1A<br>(65)  | 42-62 (21)                    | 51-62 (12)                    | 55-59 (5)                    | C | 0.55 | 2.14 | 95.00%<br>(57/60)   | 20.00%<br>(12/60)  |  <p>SN4m<br/>Phage lambda Cro</p>                                                 |
|      | 2ecsA<br>(60)  | 42-59 (18)                    | 51-59 (9)                     | 55-59 (5)                    |   |      |      |                     |                    |                                                                                                                                                                        |

|      |               |            |            |             |   |      |      |                    |                   |                                                                                       |
|------|---------------|------------|------------|-------------|---|------|------|--------------------|-------------------|---------------------------------------------------------------------------------------|
| 1074 | 2orcA<br>(71) | 43-63 (21) | 49-63 (15) | 56A-56B (1) | C | 0.62 | 1.71 | 100.00%<br>(66/66) | 81.82%<br>(54/66) | 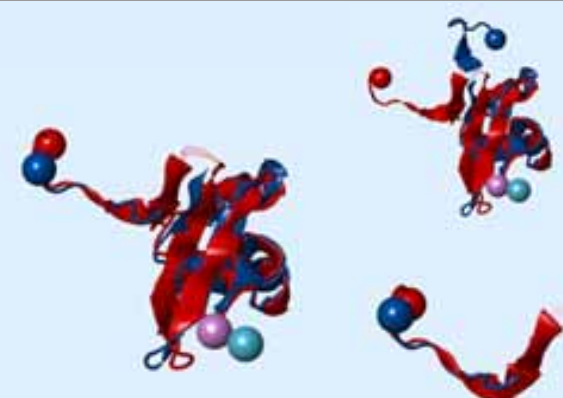    |
|      | 2a63A<br>(66) | 43-65 (23) | 49-65 (17) | 56A-56B (1) |   |      |      |                    |                   |                                                                                       |
| 1075 | 1d1mB<br>(65) | 54-64 (11) | 54-64 (11) | 55-60 (6)   | C | 0.86 | 0.91 | 100.00%<br>(61/61) | 91.80%<br>(56/61) |    |
|      | 1d11A<br>(61) | 54-60 (7)  | 54-60 (7)  | 55-60 (6)   |   |      |      |                    |                   |                                                                                       |
| 1076 | 1d1mB<br>(65) | 45-64 (20) | 46-64 (19) | 55-56 (2)   | C | 0.70 | 1.37 | 98.46%<br>(64/65)  | 81.54%<br>(53/65) |  |
|      | 2a63A<br>(66) | 45-64 (20) | 46-64 (19) | 55-56 (2)   |   |      |      |                    |                   |                                                                                       |

|      |               |              |             |             |   |      |      |                   |                   |                                                                                                                                                                                                                                                                   |
|------|---------------|--------------|-------------|-------------|---|------|------|-------------------|-------------------|-------------------------------------------------------------------------------------------------------------------------------------------------------------------------------------------------------------------------------------------------------------------|
| 1077 | 1gcpA<br>(65) | 627-635 (9)  | 628-635 (8) | 628-635 (8) | N | 0.62 | 1.46 | 91.53%<br>(54/59) | 18.64%<br>(11/59) |   <p>VAV proto-oncogene<br/>Epidermal growth factor receptor<br/>kinase subst</p>           |
|      | 1i07A<br>(59) | 33-39 (7)    | 34-39 (6)   | 628-635 (8) |   |      |      |                   |                   |                                                                                                                                                                                                                                                                   |
| 1078 | 1ckaA<br>(57) | 162-169 (8)  | 162-169 (8) | 162-168 (7) | C | 0.78 | 0.82 | 92.98%<br>(53/57) | 26.32%<br>(15/57) |   <p>C-CRK N-terminal SH3 domain<br/>Epidermal growth factor receptor<br/>kinase subst</p> |
|      | 1i07A<br>(59) | 34-40 (7)    | 34-40 (7)   | 162-168 (7) |   |      |      |                   |                   |                                                                                                                                                                                                                                                                   |
| 1079 | 1m3aA<br>(57) | 136-190 (55) | 162-169 (8) | 162-169 (8) | C | 0.65 | 1.59 | 92.98%<br>(53/57) | 26.32%<br>(15/57) |   <p>Proto-oncogene C-crk<br/>Epidermal growth factor receptor<br/>kinase subst</p>     |
|      | 1i07A<br>(59) | 8-61 (54)    | 34-40 (7)   | 162-169 (8) |   |      |      |                   |                   |                                                                                                                                                                                                                                                                   |



|      |               |              |              |             |   |      |      |                   |                   |                                                                                                                                                                                                                                                                  |
|------|---------------|--------------|--------------|-------------|---|------|------|-------------------|-------------------|------------------------------------------------------------------------------------------------------------------------------------------------------------------------------------------------------------------------------------------------------------------|
| 1080 | 1zuyA<br>(58) | 30-36 (7)    | 30-36 (7)    | 30-36 (7)   | C | 0.68 | 1.53 | 93.10%<br>(54/58) | 24.14%<br>(14/58) |  <br>Myosin-5 isoform<br>Epidermal growth factor receptor<br>kinase subst                  |
|      | 1i07A<br>(59) | 34-39 (6)    | 34-39 (6)    | 30-36 (7)   |   |      |      |                   |                   |                                                                                                                                                                                                                                                                  |
| 1081 | 1bu1C<br>(56) | 108-115 (8)  | 108-114 (7)  | 108-113 (6) | C | 0.77 | 0.72 | 92.86%<br>(52/56) | 26.79%<br>(15/56) |  <br>Protein (hemopoietic cell kinase)<br>Epidermal growth factor receptor<br>kinase subst |
|      | 1i07A<br>(59) | 34-41 (8)    | 34-40 (7)    | 108-113 (6) |   |      |      |                   |                   |                                                                                                                                                                                                                                                                  |
| 1082 | 1avzC<br>(57) | 102-120 (19) | 105-120 (16) | 112-119 (8) | C | 0.73 | 1.13 | 92.98%<br>(53/57) | 28.07%<br>(16/57) |  <br>FYN tyrosine kinase<br>Epidermal growth factor receptor<br>kinase subst           |
|      | 1i07A<br>(59) | 24-41 (18)   | 27-41 (15)   | 112-119 (8) |   |      |      |                   |                   |                                                                                                                                                                                                                                                                  |

|      |                |              |              |             |   |      |      |                     |                    |                                                                                                                                                                                                                                                                                 |
|------|----------------|--------------|--------------|-------------|---|------|------|---------------------|--------------------|---------------------------------------------------------------------------------------------------------------------------------------------------------------------------------------------------------------------------------------------------------------------------------|
| 1083 | 2ebpA<br>(73)  | 13-56 (44)   | 39-56 (18)   | 39-46 (8)   | C | 0.55 | 1.55 | 93.22%<br>(55/59)   | 16.95%<br>(10/59)  |   <p>SAM and SH3 domain-containing protein 1<br/>Epidermal growth factor receptor kinase subst</p>          |
|      | 1i07A<br>(59)  | 10-51 (42)   | 34-51 (18)   | 39-46 (8)   |   |      |      |                     |                    |                                                                                                                                                                                                                                                                                 |
| 1084 | 2eyxA<br>(67)  | 265-284 (20) | 265-284 (20) | 267-274 (8) | N | 0.65 | 1.54 | 96.61%<br>(57/59)   | 13.56%<br>(8/59)   |   <p>V-crk sarcoma virus CT10 oncogene homolog iso<br/>Epidermal growth factor receptor kinase subst</p> |
|      | 1i07A<br>(59)  | 32-51 (20)   | 32-51 (20)   | 267-274 (8) |   |      |      |                     |                    |                                                                                                                                                                                                                                                                                 |
| 1085 | 2vq9A<br>(123) | 21-25 (5)    | 21-25 (5)    | 23-25 (3)   | N | 0.62 | 1.66 | 91.06%<br>(112/123) | 30.89%<br>(38/123) |   <p>Rnase 1<br/>Ribonuclease 1</p>                                                                   |
|      | 1h8xA<br>(125) | 117-125 (9)  | 117-125 (9)  | 23-25 (3)   |   |      |      |                     |                    |                                                                                                                                                                                                                                                                                 |

|      |                |              |              |           |   |      |      |                     |                    |                                                                                                                                                                             |
|------|----------------|--------------|--------------|-----------|---|------|------|---------------------|--------------------|-----------------------------------------------------------------------------------------------------------------------------------------------------------------------------|
| 1086 | 1yv7A<br>(102) | 10-20 (11)   | 12-18 (7)    | 15-18 (4) | N | 0.56 | 1.67 | 95.10%<br>(97/102)  | 24.51%<br>(25/102) |       |
|      | 1h8xA<br>(125) | 112-127 (16) | 114-125 (12) | 15-18 (4) |   |      |      |                     |                    |                                                                                                                                                                             |
| 1087 | 1k5aA<br>(118) | 13-24 (12)   | 14-24 (11)   | 17-24 (8) | N | 0.67 | 1.50 | 94.07%<br>(111/118) | 34.75%<br>(41/118) |       |
|      | 1h8xA<br>(125) | 112-124 (13) | 113-124 (12) | 17-24 (8) |   |      |      |                     |                    |                                                                                                                                                                             |
| 1088 | 1un5A<br>(121) | 13-24 (12)   | 15-24 (10)   | 17-24 (8) | N | 0.66 | 1.52 | 92.56%<br>(112/121) | 35.54%<br>(43/121) |   |
|      | 1h8xA<br>(125) | 112-124 (13) | 114-124 (11) | 17-24 (8) |   |      |      |                     |                    |                                                                                                                                                                             |

|      |                |             |             |           |   |      |      |                      |                     |                                                                                                                                                       |
|------|----------------|-------------|-------------|-----------|---|------|------|----------------------|---------------------|-------------------------------------------------------------------------------------------------------------------------------------------------------|
| 1089 | 1a5qA<br>(124) | 15-23 (9)   | 16-23 (8)   | 17-23 (7) | N | 0.86 | 1.03 | 98.39%<br>(122/124)  | 69.35%<br>(86/124)  | <br>Ribonuclease A<br>Ribonuclease 1                                |
|      | 1h8xA<br>(125) | 115-123 (9) | 116-123 (8) | 17-23 (7) |   |      |      |                      |                     |                                                                                                                                                       |
| 1090 | 11bgA<br>(124) | 16-22 (7)   | 16-22 (7)   | 16-22 (7) | N | 0.61 | 0.70 | 100.00%<br>(122/122) | 99.18%<br>(121/122) | <br>Protein (bovine seminal ribonuclease)<br>Ribonuclease, seminal |
|      | 1r3mB<br>(122) | 16-22 (7)   | 16-22 (7)   | 16-22 (7) |   |      |      |                      |                     |                                                                                                                                                       |
| 1091 | 11bgA<br>(124) | 15-22 (8)   | 15-22 (8)   | 15-22 (8) | N | 0.90 | 0.90 | 99.19%<br>(123/124)  | 80.65%<br>(100/124) | <br>Protein (bovine seminal ribonuclease)<br>Ribonuclease A      |
|      | 1a2wA<br>(124) | 15-22 (8)   | 15-22 (8)   | 15-22 (8) |   |      |      |                      |                     |                                                                                                                                                       |

|      |                |              |             |           |   |      |      |                     |                    |                                                                                                                                                    |
|------|----------------|--------------|-------------|-----------|---|------|------|---------------------|--------------------|----------------------------------------------------------------------------------------------------------------------------------------------------|
| 1092 | 11bgA<br>(124) | 15-24 (10)   | 15-23 (9)   | 15-23 (9) | N | 0.86 | 1.05 | 98.39%<br>(122/124) | 71.77%<br>(89/124) |  <p>Protein (bovine seminal ribonuclease)<br/>Ribonuclease 1</p> |
|      | 1h8xA<br>(125) | 115-124 (10) | 115-123 (9) | 15-23 (9) |   |      |      |                     |                    |                                                                                                                                                    |
| 1093 | 11baA<br>(124) | 15-24 (10)   | 15-23 (9)   | 15-23 (9) | N | 0.85 | 1.16 | 99.19%<br>(123/124) | 74.19%<br>(92/124) |  <p>Protein (ribonuclease, seminal)<br/>Ribonuclease 1</p>     |
|      | 1h8xA<br>(125) | 115-124 (10) | 115-123 (9) | 15-23 (9) |   |      |      |                     |                    |                                                                                                                                                    |
