# Supplementary material for: Detection and Alignment of 3D Domain Swapping Proteins Using Angle-Distance Image-Based Secondary Structural Matching Techniques
Source: PubMed Central journal article supplement (PMC2955075; doi:10.1371/journal.pone.0013361), 2010-10-14
Supplement: pone.0013361.s009.pdf [file pone.0013361.s009.pdf]

# Table S5. Structure-based sequence alignments for DS<sub>CO</sub> pairs in Datasets L and M performed by several protein structural comparison methods

The structure-based sequence alignments performed by TM-align [31], SARST [34] and the proposed DS-detecting method as well as the sequence alignments performed by BLAST [42] for the 1,093 DS<sub>CO</sub> pairs shown in Table S4 are listed here. In this table, hinge loops of the query and subject proteins are highlighted in red and blue, respectively. Aligned residues with identical amino acid types are highlighted in green while those with equal or positive substitution rates defined in the BLOSUM62 substitution matrix [58] are highlighted in light green. TM-align is an accurate protein structural comparison (PSC) method which also showed the best DS-detecting ability among the PSC methods treating protein structures as rigid bodies (Fig. 2c). SARST is a flexible PSC method which does not treat protein structures as rigid bodies and showed much better DS-detecting performance than conventional rigid PSC methods (Fig. 2c). BLAST is the most widely used amino acid sequence alignment method. As shown in this table, a rigid PSC method almost always gives very local alignments, which means it only aligns one pair of domains of a DS<sub>CO</sub> pair. A flexible PSC method often produces alignments more global than a rigid PSC method by simultaneously aligning the main and swapped domains. A sequence alignment method can make quite global alignments for DS-related proteins; however, if the sequence identity of a DS<sub>CO</sub> pair is <25%, in most cases the alignment will either be still very local or be not available at all (note that there are 55% DS<sub>CO</sub> pairs in this table sharing <25% identities). Only the proposed method always simultaneously aligns the hinge loops, main domains and swapped domains.

| No. | PDB entry (size) | DS type | Identity (%) | Alignment                                                                                                                                                                                                                                                                                                                                                                                                                                                                                                                                                                                                                                                                                                                                                                                                                                                                                                                                                                                                                                                                                                                                                                                                                                                                   |
|-----|------------------|---------|--------------|-----------------------------------------------------------------------------------------------------------------------------------------------------------------------------------------------------------------------------------------------------------------------------------------------------------------------------------------------------------------------------------------------------------------------------------------------------------------------------------------------------------------------------------------------------------------------------------------------------------------------------------------------------------------------------------------------------------------------------------------------------------------------------------------------------------------------------------------------------------------------------------------------------------------------------------------------------------------------------------------------------------------------------------------------------------------------------------------------------------------------------------------------------------------------------------------------------------------------------------------------------------------------------|
| 1   | 1brnL (108)      | N       | 99.07        | <p>TM-align: aliSize=73 (resi)      RMSD=0.97 (Å)</p> <p>vintfdgvadylqtyhklpdnyitkseaqalgwv-----SKGNLADVAPGKSIIGDIFSNREGKLPKSGRTWREADINYTSGFNRNSDRILYSSDWLIYKTTDHYQTFTKIR<br/>           -----vintfdgvadylqtyhklpdnyitkseaqalgwvASKGNLADVAPGKSIIGDIFSNREGKLPKSGRTWREADINYTSGFNRNSDRILYSSDWLIYKTTDHYQTFTKIR</p> <p>SARST: aliSize=106 (resi)      RMSD=17.16 (Å)</p> <p>v-INTFDGVADYLQTYHKLDPNYITKSEAQALGWVASKGNLADVAPGKSIIGDIFSNREGKLPKSGRTWREADINYTSGFNRNSDRILYSSDWLIYKTTDHYQTFTKIR-r<br/>           -vINTFDGVADYLQTYHKLDPNYITKSEAQALGWVASKGNLADVAPGKSIIGDIFSNREGKLPKSGRTWREADINYTSGFNRNSDRILYSSDWLIYKTTDHYQTFTKIR-r</p> <p>BLAST: aliSize=108 (resi)      iden=100.00% (108/108)      simi=100.00% (108/108)</p> <p>VINTFDGVADYLQTYHKLDPNYITKSEAQALGWVASKGNLADVAPGKSIIGDIFSNREGKLPKSGRTWREADINYTSGFNRNSDRILYSSDWLIYKTTDHYQTFTKIR<br/>           VINTFDGVADYLQTYHKLDPNYITKSEAQALGWVASKGNLADVAPGKSIIGDIFSNREGKLPKSGRTWREADINYTSGFNRNSDRILYSSDWLIYKTTDHYQTFTKIR</p> <p>Proposed: aliSize=107 (resi)      RMSD=0.47 (Å)</p> <p>VINTFDGVADYLQTYHKLDPNYITKSEAQALGWVAS-KGNLADVAPGKSIIGDIFSNREGKLPKSGRTWREADINYTSGFNRNSDRILYSSDWLIYKTTDHYQTFTKIR<br/>           VINTFDGVADYLQTYHKLDPNYITKSEAQALGWVASK-GNLADVAPGKSIIGDIFSNREGKLPKSGRTWREADINYTSGFNRNSDRILYSSDWLIYKTTDHYQTFTKIR</p> |
|     | 1yvsA (108)      |         |              |                                                                                                                                                                                                                                                                                                                                                                                                                                                                                                                                                                                                                                                                                                                                                                                                                                                                                                                                                                                                                                                                                                                                                                                                                                                                             |
| 2   | 4icbA (76)       | C       | 96.05        | <p>TM-align: aliSize=48 (resi)      RMSD=1.79 (Å)</p> <p>MKSPEELKGI FEKYAAKEGDPNQLSKEELKLLQTEFPSSLK-GPSIld--Elfe--ldkngdgevsfeefqvlvkkisq-----<br/>           MKSPEELKGI FEKYAAKEGDPNNLSKEELKLLQTEFPSSLKGMST---ldel---fe-----ldkngdgevsfeefqvlvkkisq</p> <p>SARST: aliSize=69 (resi)      RMSD=10.69 (Å)</p> <p>mk--SPEELKGI FEKYAAKEGDPNQLSKEELKLLQTEFPSSLKGPSTLDELFEEL-DKNGDGEVSFEFQVLVK----kisk<br/>           --mkSPEELKGI FEKYAAKEGDPNNLSKEELKLLQTEFPSSLK-GMSTLDELFEEL-DKNGDGEVSFEFQVLVKkisk----</p> <p>BLAST: aliSize=74 (resi)      iden=97.37% (74/76)      simi=97.37% (74/76)</p> <p>MKSPEELKGI FEKYAAKEGDPNQLSKEELKLLQTEFPSSLKGPSTLDELFEELDKNGDGEVSFEFQVLVKKISQ<br/>           MKSPEELKGI FEKYAAKEGDPNNLSKEELKLLQTEFPSSLKGMSTLDELFEELDKNGDGEVSFEFQVLVKKISQ</p> <p>Proposed: aliSize=74 (resi)      RMSD=0.97 (Å)</p> <p>MKSPEELKGI FEKYAAKEGDPNQLSKEELKLLQTEFPSSLK-G--psTLDELFEELDKNGDGEVSFEFQVLVKKISQ<br/>           MKSPEELKGI FEKYAAKEGDPNNLSKEELKLLQTEFPSSLKGMs--TLDELFEELDKNGDGEVSFEFQVLVKKISQ</p>                                                                                                                                                                                                                                                          |
|     | 1ht9A (76)       |         |              |                                                                                                                                                                                                                                                                                                                                                                                                                                                                                                                                                                                                                                                                                                                                                                                                                                                                                                                                                                                                                                                                                                                                                                                                                                                                             |

|   |                                                     |   |        |                                                                                                                                                                                                                                                                                                                                                                                                                                                                                                                                                                                                                                                                                                                                                                                                                                                                                                                                                                                                                                                                                                                                                                                                                                                                                                                                                                                                                                                                   |
|---|-----------------------------------------------------|---|--------|-------------------------------------------------------------------------------------------------------------------------------------------------------------------------------------------------------------------------------------------------------------------------------------------------------------------------------------------------------------------------------------------------------------------------------------------------------------------------------------------------------------------------------------------------------------------------------------------------------------------------------------------------------------------------------------------------------------------------------------------------------------------------------------------------------------------------------------------------------------------------------------------------------------------------------------------------------------------------------------------------------------------------------------------------------------------------------------------------------------------------------------------------------------------------------------------------------------------------------------------------------------------------------------------------------------------------------------------------------------------------------------------------------------------------------------------------------------------|
| 3 | <p>IhngA<br/>(175)</p> <hr/> <p>IcdcA<br/>(96)</p>  | C | 97.92  | <p>TM-align: aliSize=54 (resi) RMSD=1.17 (Å)<br/> dsgtvgalghginlnipnfqmtddidevrwergstlvaefkRK-----MKPFLKSGAFEILANGDLKIKNLTRDDSGTYNVTVYSTNGTRILNKALDLRIlemvskpmiywecsnatl tcevegTdvelklygqkehlrslrqktsyqwt<br/> -----gtvwgalghginlnipnfqmtddidevrwergstlvaefkRKMKPFLKSGAFEILANGDLKIKNLTRDDSGTYNVTVYSTNGTRILNKALDLRIE-----E-----</p> <p>nIrapfkckavnrvsqesemevncpe</p> <p>SARST: aliSize=92 (resi) RMSD=18.76 (Å)<br/> dsg-TVWGALGHGINLNIPNFQMTDDIDEVRWERGSTLVAEFKRKMKPFLKSGAFEILANGDLKIKNLTRDDSGTYNVTVYSTNGTRILNKALDLRI----ilemvskpmiywecsnatl tcevegTdvelklygqkehlrslrqktsyqwt nIrapfkckavnrvsqesemevncpe<br/> ---gTVWGALGHGINLNIPNFQMTDDIDEVRWERGSTLVAEFKRKMKPFLKSGAFEILANGDLKIKNLTRDDSGTYNVTVYSTNGTRILNKALDLRIle-----</p> <p>BLAST: aliSize=96 (resi) iden=98.96% (95/96) simi=100.00% (96/96)<br/> dsg-TVWGALGHGINLNIPNFQMTDDIDEVRWERGSTLVAEFKRKMKPFLKSGAFEILANGDLKIKNLTRDDSGTYNVTVYSTNGTRILNKALDLRIlemvskpmiywecsnatl tcevegTdvelklygqkehlrslrqktsyqwt nIrapfkckavnrvsqesemevncpe<br/> ---gTVWGALGHGINLNIPNFQMTDDIDEVRWERGSTLVAEFKRKMKPFLKSGAFEILANGDLKIKNLTRDDSGTYNVTVYSTNGTRILNKALDLRIle-----</p> <p>Proposed: aliSize=96 (resi) RMSD=1.01 (Å)<br/> dsg-TVWGALGHGINLNIPNFQMTDDIDEVRWERGSTLVAEFKRKMKPFLKSGAFEILANGDLKIKNLTRDDSGTYNVTVYSTNGTRILNKALDLRIlemvskpmiywecsnatl tcevegTdvelklygqkehlrslrqktsyqwt nIrapfkckavnrvsqesemevncpe<br/> ---gTVWGALGHGINLNIPNFQMTDDIDEVRWERGSTLVAEFKRKMKPFLKSGAFEILANGDLKIKNLTRDDSGTYNVTVYSTNGTRILNKALDLRIle-----E-----</p> |
| 4 | <p>IorcA<br/>(64)</p> <hr/> <p>5croA<br/>(61)</p>   | C | 93.44  | <p>TM-align: aliSize=57 (resi) RMSD=1.69 (Å)<br/> --QRITLKDYAMRFGQTKTAKDLGVYQSAINKA IHAGRK IFLT INADGSVYAEVKDGEvkpfpsn--<br/> meQRITLKDYAMRFGQTKTAKDLGVYQSAINKA IHAGRK IFLT INADGSVYAEVKPPF-----sn</p> <p>SARST: aliSize=55 (resi) RMSD=3.06 (Å)<br/> qr----ITLKDYAMRFGQTKTAKDLGVYQSAINKA IHAGRK IFLT INADGSVYAEVKdgeVKPPF-sn<br/> --meqrITLKDYAMRFGQTKTAKDLGVYQSAINKA IHAGRK IFLT INADGSVYAEVKPPF-----VKPPFs--</p> <p>BLAST: aliSize=58 (resi) iden=96.67% (58/61) simi=96.67% (58/61)<br/> --QRITLKDYAMRFGQTKTAKDLGVYQSAINKA IHAGRK IFLT INADGSVYAEVKdgevKPPPSn<br/> meQRITLKDYAMRFGQTKTAKDLGVYQSAINKA IHAGRK IFLT INADGSVYAEVK-----PPPS-</p> <p>Proposed: aliSize=59 (resi) RMSD=1.24 (Å)<br/> --QRITLKDYAMRFGQTKTAKDLGVYQSAINKA IHAGRK IFLT INADGSVYAEVKdgeVKI fpsn<br/> meQRITLKDYAMRFGQTKTAKDLGVYQSAINKA IHAGRK IFLT INADGSVYAEVK---PPF---sn</p>                                                                                                                                                                                                                                                                                                                                                                                                                                                                                                                                                                                                            |
| 5 | <p>2ezmA<br/>(101)</p> <hr/> <p>3ezmA<br/>(101)</p> | C | 100.00 | <p>TM-align: aliSize=51 (resi) RMSD=1.06 (Å)<br/> LGKFSQTCYNsAIQGSVLTSTCERInGGYNTSSIDLNSV IENVdGSLK WQPSnfiETCRNTQLAGSSELAEECKTRAQQFVSTKINLDDHIANIDGTLKYE-----<br/> LGKFSQTCYNsAIQGSVLTSTCERInGGYNTSSIDLNSV IENVdGSLK WQP-----snfiETCRNTQLAGSSELAEECKTRAQQFVSTKINLDDHIANIDGTLKYE</p> <p>SARST: aliSize=99 (resi) RMSD=16.28 (Å)<br/> l-GKFSQTCYNsAIQGSVLTSTCERInGGYNTSSIDLNSV IENVdGSLK WQPSNF IETCRNTQLAGSSELAEECKTRAQQFVSTKINLDDHIANIDGTLKYE-e<br/> -l-GKFSQTCYNsAIQGSVLTSTCERInGGYNTSSIDLNSV IENVdGSLK WQPSNF IETCRNTQLAGSSELAEECKTRAQQFVSTKINLDDHIANIDGTLKYE-e</p> <p>BLAST: aliSize=101 (resi) iden=100.00% (101/101) simi=100.00% (101/101)<br/> LGKFSQTCYNsAIQGSVLTSTCERInGGYNTSSIDLNSV IENVdGSLK WQPSNF IETCRNTQLAGSSELAEECKTRAQQFVSTKINLDDHIANIDGTLKYE<br/> LGKFSQTCYNsAIQGSVLTSTCERInGGYNTSSIDLNSV IENVdGSLK WQPSNF IETCRNTQLAGSSELAEECKTRAQQFVSTKINLDDHIANIDGTLKYE</p> <p>Proposed: aliSize=101 (resi) RMSD=0.82 (Å)<br/> LGKFSQTCYNsAIQGSVLTSTCERInGGYNTSSIDLNSV IENVdGSLK WQPSNF IETCRNTQLAGSSELAEECKTRAQQFVSTKINLDDHIANIDGTLKYE<br/> LGKFSQTCYNsAIQGSVLTSTCERInGGYNTSSIDLNSV IENVdGSLK WQPSNF IETCRNTQLAGSSELAEECKTRAQQFVSTKINLDDHIANIDGTLKYE</p>                                                                                                                                                                                                                                                                                                   |

|   |                                             |   |       |                                                                                                                                                                                                                                                                                                                                                                                                                                                                                                                                                                                                                                                                                                                                                                                                                                                                                                                                                                                                                                                                                                                                                                                                                                                              |
|---|---------------------------------------------|---|-------|--------------------------------------------------------------------------------------------------------------------------------------------------------------------------------------------------------------------------------------------------------------------------------------------------------------------------------------------------------------------------------------------------------------------------------------------------------------------------------------------------------------------------------------------------------------------------------------------------------------------------------------------------------------------------------------------------------------------------------------------------------------------------------------------------------------------------------------------------------------------------------------------------------------------------------------------------------------------------------------------------------------------------------------------------------------------------------------------------------------------------------------------------------------------------------------------------------------------------------------------------------------|
| 6 | <p>ImdtA (523)</p> <hr/> <p>1ldtA (523)</p> | C | 98.85 | <p>TM-align: aliSize=390 (resi) RMSD=2.34 (Å)</p> <p>-----LGGYMLGSAMSRPI IHFGSDYEDRYRENMHRYPNQVYRPMDEYSNQNNFVHDCVNIITIKOHTVTTtKGenftetdtkmmervveqmcitqyeresqayr-----<br/> gavvgg-----LGGYMLGSAMSRPI IHFGSDYEDRYRENMHRYPNQVYRPMDEYSNQNNFVHDCVNIITIKOHTVTT--TTK-----genftetdtkmmervveqmcitqyeresqayr-----</p> <p>SARST: aliSize=521 (resi) RMSD=15.63 (Å)</p> <p>l-----GGYMLGSAMSRPI IHFGSDYEDRYRENMHRYPNQVYRPMDEYSNQNNFVHDCVNIITIKOHTV----TtTKgenFTETDVKMMERVVEQMCITQYERESQA--yyqr<br/> -gavvgglGGYMLGSAMSRPI IHFGSDYEDRYRENMHRYPNQVYRPMDEYSNQNNFVHDCVNIITIKOHTVt t t t KGEN----FTETDVKMMERVVEQMCITQYERESQAyy----</p> <p>BLAST: aliSize=523 (resi) iden=100.00% (523/523) simi=100.00% (523/523)</p> <p>-----LGGYMLGSAMSRPI IHFGSDYEDRYRENMHRYPNQVYRPMDEYSNQNNFVHDCVNIITIKOHTVTTtKGenftetdtkmmervveqmcitqyeresqayr<br/> gavvgg-----LGGYMLGSAMSRPI IHFGSDYEDRYRENMHRYPNQVYRPMDEYSNQNNFVHDCVNIITIKOHTVTTtKGENftetdtkmmervveqmcitqyeresqayr-----</p> <p>Proposed: aliSize=517 (resi) RMSD=0.84 (Å)</p> <p>-----LGGYMLGSAMSRPI IHFGSDYEDRYRENMHRYPNQVYRPMDEYSNQNNFVHDCVNIITIKOHTVt---TtKgenFTETDVKMMERVVEQMCITQYERESQAyyqR<br/> gavvgg-----LGGYMLGSAMSRPI IHFGSDYEDRYRENMHRYPNQVYRPMDEYSNQNNFVHDCVNIITIKOHTVt t t t KGEN---ENFTETDVKMMERVVEQMCITQYERESQAyy--Y</p> |
| 7 | <p>IqlxA (104)</p> <hr/> <p>Ii4mA (108)</p> | C | 92.31 | <p>TM-align: aliSize=70 (resi) RMSD=1.85 (Å)</p> <p>-----LGGYMLGSAMSRPI IHFGSDYEDRYRENMHRYPNQVYRPMDEYSNQNNFVHDCVNIITIKOHTVTTtKGenftetdtkmmervveqmcitqyeresqayr-----<br/> gavvgg-----LGGYMLGSAMSRPI IHFGSDYEDRYRENMHRYPNQVYRPMDEYSNQNNFVHDCVNIITIKOHTVTT--TTK-----genftetdtkmmervveqmcitqyeresqayr-----</p> <p>SARST: aliSize=95 (resi) RMSD=20.86 (Å)</p> <p>l-----GGYMLGSAMSRPI IHFGSDYEDRYRENMHRYPNQVYRPMDEYSNQNNFVHDCVNIITIKOHTV----TtTKgenFTETDVKMMERVVEQMCITQYERESQA--yyqr<br/> -gavvgglGGYMLGSAMSRPI IHFGSDYEDRYRENMHRYPNQVYRPMDEYSNQNNFVHDCVNIITIKOHTVt t t t KGEN----FTETDVKMMERVVEQMCITQYERESQAyy----</p> <p>BLAST: aliSize=102 (resi) iden=98.08% (102/104) simi=98.08% (102/104)</p> <p>-----LGGYMLGSAMSRPI IHFGSDYEDRYRENMHRYPNQVYRPMDEYSNQNNFVHDCVNIITIKOHTVTTtKGenftetdtkmmervveqmcitqyeresqayr<br/> gavvgg-----LGGYMLGSAMSRPI IHFGSDYEDRYRENMHRYPNQVYRPMDEYSNQNNFVHDCVNIITIKOHTVTTtKGENftetdtkmmervveqmcitqyeresqayr-----</p> <p>Proposed: aliSize=99 (resi) RMSD=1.56 (Å)</p> <p>-----LGGYMLGSAMSRPI IHFGSDYEDRYRENMHRYPNQVYRPMDEYSNQNNFVHDCVNIITIKOHTVt---TtKgenFTETDVKMMERVVEQMCITQYERESQAyyqR<br/> gavvgg-----LGGYMLGSAMSRPI IHFGSDYEDRYRENMHRYPNQVYRPMDEYSNQNNFVHDCVNIITIKOHTVt t t t KGEN---ENFTETDVKMMERVVEQMCITQYERESQAyy--Y</p>      |
| 8 | <p>Ihz5A (72)</p> <hr/> <p>IjmlA (72)</p>   | C | 88.89 | <p>TM-align: aliSize=60 (resi) RMSD=1.68 (Å)</p> <p>--MHHHHHHamEVTIKANLIFANGSTQTAEFKGTFEKATSEAYAYADTLKKNNGEWTVDVADKgytlnikfag-----<br/> mhHHHHHGM--EVTIKANLIFANGSTQTAEFKGTFEKATSEAYAYADTLKKNNGEWTVDVVPK-----aytlnikfag</p> <p>SARST: aliSize=69 (resi) RMSD=11.31 (Å)</p> <p>mh--HHHHHAMEEVTIKANLIFANGSTQTAEFKGTFEKATSEAYAYADTLKKNNGEWTVDVADKGYTLNlKfA-g<br/> --mhHHHHHGMEEVTIKANLIFANGSTQTAEFKGTFEKATSEAYAYADTLKKNNGEWTVDVVPKAYTLNlKfA-g</p> <p>BLAST: aliSize=68 (resi) iden=94.44% (68/72) simi=94.44% (68/72)</p> <p>MHHHHHHAMEEVTIKANLIFANGSTQTAEFKGTFEKATSEAYAYADTLKKNNGEWTVDVADKGYTLNlKfAG<br/> MHHHHHGMEEVTIKANLIFANGSTQTAEFKGTFEKATSEAYAYADTLKKNNGEWTVDVVPKAYTLNlKfAG</p> <p>Proposed: aliSize=70 (resi) RMSD=1.58 (Å)</p> <p>--MHHHHHHamEVTIKANLIFANGSTQTAEFKGTFEKATSEAYAYADTLKKNNGEWTVDVADKGYTLNlKfAG<br/> mhHHHHHGM--EVTIKANLIFANGSTQTAEFKGTFEKATSEAYAYADTLKKNNGEWTVDVVPKAYTLNlKfAG</p>                                                                                                                                                                                                                                                                                                                                                          |

|    |                |   |        |                                                                                                                                                                                                                                                                                                                                                                                                                                                                                                                                                                                                                                                                                                                                                                                                                                                                                                                                                                                                                                                                                                                                                                                                                                                                                                                                                                                                                                                                       |
|----|----------------|---|--------|-----------------------------------------------------------------------------------------------------------------------------------------------------------------------------------------------------------------------------------------------------------------------------------------------------------------------------------------------------------------------------------------------------------------------------------------------------------------------------------------------------------------------------------------------------------------------------------------------------------------------------------------------------------------------------------------------------------------------------------------------------------------------------------------------------------------------------------------------------------------------------------------------------------------------------------------------------------------------------------------------------------------------------------------------------------------------------------------------------------------------------------------------------------------------------------------------------------------------------------------------------------------------------------------------------------------------------------------------------------------------------------------------------------------------------------------------------------------------|
| 9  | 5rsaA<br>(124) | N | 100.00 | <p>TM-align: aliSize=105 (resi) RMSD=0.85 (Å)<br/> ketaaakferqhmdsst <b>sa</b>-----ASSSNYCNQMMKSRNLTKDRCKPVNTFVHESLADVOAVCSOKNVACKNGOTNCYQSYSTMSITDCRETGSSKYPNCA YKTTQANKHI IVACEGNPYVPVHFDASV<br/> -----ketaaakferqhmdsst <b>sa</b>ASSSNYCNQMMKSRNLTKDRCKPVNTFVHESLADVOAVCSOKNVACKNGOTNCYQSYSTMSITDCRETGSSKYPNCA YKTTQANKHI IVACEGNPYVPVHFDASV</p> <p>SARST: aliSize=122 (resi) RMSD=14.18 (Å)<br/> k-ETAAAKFERQHMDSSST<b>SAASS</b>SNYCNQMMKSRNLTKDRCKPVNTFVHESLADVOAVCSOKNVACKNGOTNCYQSYSTMSITDCRETGSSKYPNCA YKTTQANKHI IVACEGNPYVPVHFDASV -v<br/> -kETAAAKFERQHMDSSST<b>SAASS</b>SNYCNQMMKSRNLTKDRCKPVNTFVHESLADVOAVCSOKNVACKNGOTNCYQSYSTMSITDCRETGSSKYPNCA YKTTQANKHI IVACEGNPYVPVHFDASV -v</p> <p>BLAST: aliSize=124 (resi) iden=100.00% (124/124) simi=100.00% (124/124)<br/> KETAAAKFERQHMDSSST<b>SAASS</b>SNYCNQMMKSRNLTKDRCKPVNTFVHESLADVOAVCSOKNVACKNGOTNCYQSYSTMSITDCRETGSSKYPNCA YKTTQANKHI IVACEGNPYVPVHFDASV<br/> KETAAAKFERQHMDSSST<b>SAASS</b>SNYCNQMMKSRNLTKDRCKPVNTFVHESLADVOAVCSOKNVACKNGOTNCYQSYSTMSITDCRETGSSKYPNCA YKTTQANKHI IVACEGNPYVPVHFDASV</p> <p>Proposed: aliSize=124 (resi) RMSD=0.54 (Å)<br/> KETAAAKFERQHMDSSST<b>SAASS</b>SNYCNQMMKSRNLTKDRCKPVNTFVHESLADVOAVCSOKNVACKNGOTNCYQSYSTMSITDCRETGSSKYPNCA YKTTQANKHI IVACEGNPYVPVHFDASV<br/> KETAAAKFERQHMDSSST<b>SAASS</b>SNYCNQMMKSRNLTKDRCKPVNTFVHESLADVOAVCSOKNVACKNGOTNCYQSYSTMSITDCRETGSSKYPNCA YKTTQANKHI IVACEGNPYVPVHFDASV</p>                                                  |
| 10 | 5rsaA<br>(124) | C | 100.00 | <p>TM-align: aliSize=115 (resi) RMSD=1.27 (Å)<br/> KETAAAKFERQHMDSSST<b>SAASS</b>SNYCNQMMKSRNLTKDRCKPVNTFVHESLADVOAVCSOKNVACKNGOTNCYQSYSTMSITDCRETGSSKYPNCA YKTTQANKHI IVACE<b>GN</b>PYvpvhfdasv-----<br/> KETAAAKFERQHMDSSST<b>SAASS</b>SNYCNQMMKSRNLTKDRCKPVNTFVHESLADVOAVCSOKNVACKNGOTNCYQSYSTMSITDCRETGSSKYPNCA YKTTQANKHI IVACE<b>GN</b>PY-----vpvhfdasv</p> <p>SARST: aliSize=122 (resi) RMSD=8.84 (Å)<br/> k-ETAAAKFERQHMDSSST<b>SAASS</b>SNYCNQMMKSRNLTKDRCKPVNTFVHESLADVOAVCSOKNVACKNGOTNCYQSYSTMSITDCRETGSSKYPNCA YKTTQANKHI IVACE<b>GN</b>PYPVHFDASV -v<br/> -kETAAAKFERQHMDSSST<b>SAASS</b>SNYCNQMMKSRNLTKDRCKPVNTFVHESLADVOAVCSOKNVACKNGOTNCYQSYSTMSITDCRETGSSKYPNCA YKTTQANKHI IVACE<b>GN</b>PYPVHFDASV -v</p> <p>BLAST: aliSize=124 (resi) iden=100.00% (124/124) simi=100.00% (124/124)<br/> KETAAAKFERQHMDSSST<b>SAASS</b>SNYCNQMMKSRNLTKDRCKPVNTFVHESLADVOAVCSOKNVACKNGOTNCYQSYSTMSITDCRETGSSKYPNCA YKTTQANKHI IVACE<b>GN</b>PYPVHFDASV<br/> KETAAAKFERQHMDSSST<b>SAASS</b>SNYCNQMMKSRNLTKDRCKPVNTFVHESLADVOAVCSOKNVACKNGOTNCYQSYSTMSITDCRETGSSKYPNCA YKTTQANKHI IVACE<b>GN</b>PYPVHFDASV</p> <p>Proposed: aliSize=124 (resi) RMSD=0.43 (Å)<br/> KETAAAKFERQHMDSSST<b>SAASS</b>SNYCNQMMKSRNLTKDRCKPVNTFVHESLADVOAVCSOKNVACKNGOTNCYQSYSTMSITDCRETGSSKYPNCA YKTTQANKHI IVACE<b>GN</b>PYPVHFDASV<br/> KETAAAKFERQHMDSSST<b>SAASS</b>SNYCNQMMKSRNLTKDRCKPVNTFVHESLADVOAVCSOKNVACKNGOTNCYQSYSTMSITDCRETGSSKYPNCA YKTTQANKHI IVACE<b>GN</b>PYPVHFDASV</p> |
| 11 | 5rsaA<br>(124) | C | 100.00 | <p>TM-align: aliSize=115 (resi) RMSD=1.38 (Å)<br/> KETAAAKFERQHMDSSST<b>SAASS</b>SNYCNQMMKSRNLTKDRCKPVNTFVHESLADVOAVCSOKNVACKNGOTNCYQSYSTMSITDCRETGSSKYPNCA YKTTQANKHI IVACE<b>GN</b>PYvpvhfdasv-----<br/> KETAAAKFERQHMDSSST<b>SAASS</b>SNYCNQMMKSRNLTKDRCKPVNTFVHESLADVOAVCSOKNVACKNGOTNCYQSYSTMSITDCRETGSSKYPNCA YKTTQANKHI IVACE<b>GN</b>PY-----vpvhfdasv</p> <p>SARST: aliSize=122 (resi) RMSD=6.27 (Å)<br/> k-ETAAAKFERQHMDSSST<b>SAASS</b>SNYCNQMMKSRNLTKDRCKPVNTFVHESLADVOAVCSOKNVACKNGOTNCYQSYSTMSITDCRETGSSKYPNCA YKTTQANKHI IVACE<b>GN</b>PYPVHFDASV -v<br/> -kETAAAKFERQHMDSSST<b>SAASS</b>SNYCNQMMKSRNLTKDRCKPVNTFVHESLADVOAVCSOKNVACKNGOTNCYQSYSTMSITDCRETGSSKYPNCA YKTTQANKHI IVACE<b>GN</b>PYPVHFDASV -v</p> <p>BLAST: aliSize=124 (resi) iden=100.00% (124/124) simi=100.00% (124/124)<br/> KETAAAKFERQHMDSSST<b>SAASS</b>SNYCNQMMKSRNLTKDRCKPVNTFVHESLADVOAVCSOKNVACKNGOTNCYQSYSTMSITDCRETGSSKYPNCA YKTTQANKHI IVACE<b>GN</b>PYPVHFDASV<br/> KETAAAKFERQHMDSSST<b>SAASS</b>SNYCNQMMKSRNLTKDRCKPVNTFVHESLADVOAVCSOKNVACKNGOTNCYQSYSTMSITDCRETGSSKYPNCA YKTTQANKHI IVACE<b>GN</b>PYPVHFDASV</p> <p>Proposed: aliSize=124 (resi) RMSD=0.57 (Å)<br/> KETAAAKFERQHMDSSST<b>SAASS</b>SNYCNQMMKSRNLTKDRCKPVNTFVHESLADVOAVCSOKNVACKNGOTNCYQSYSTMSITDCRETGSSKYPNCA YKTTQANKHI IVACE<b>GN</b>PYPVHFDASV<br/> KETAAAKFERQHMDSSST<b>SAASS</b>SNYCNQMMKSRNLTKDRCKPVNTFVHESLADVOAVCSOKNVACKNGOTNCYQSYSTMSITDCRETGSSKYPNCA YKTTQANKHI IVACE<b>GN</b>PYPVHFDASV</p> |
|    | 1js0A<br>(124) |   |        |                                                                                                                                                                                                                                                                                                                                                                                                                                                                                                                                                                                                                                                                                                                                                                                                                                                                                                                                                                                                                                                                                                                                                                                                                                                                                                                                                                                                                                                                       |

|    |                                                     |   |       |                                                                                                                                                                                                                                                                                                                                                                                                                                                                                                                                                                                                                                                                                                                                                                                                                                                                                                                                                                                                                                                                                                                                                                                                                                                                                                                                                                                                                |
|----|-----------------------------------------------------|---|-------|----------------------------------------------------------------------------------------------------------------------------------------------------------------------------------------------------------------------------------------------------------------------------------------------------------------------------------------------------------------------------------------------------------------------------------------------------------------------------------------------------------------------------------------------------------------------------------------------------------------------------------------------------------------------------------------------------------------------------------------------------------------------------------------------------------------------------------------------------------------------------------------------------------------------------------------------------------------------------------------------------------------------------------------------------------------------------------------------------------------------------------------------------------------------------------------------------------------------------------------------------------------------------------------------------------------------------------------------------------------------------------------------------------------|
| 12 | <p>5rsaA<br/>(124)</p> <hr/> <p>1bsrA<br/>(124)</p> | N | 81.45 | <p>TM-align: aliSize=104 (resi) RMSD=0.79 (Å)<br/> ketaaakferqhmdsstaa-----SSSNYCNQMMKSRNLTkDRCKPVNTFVHESLADVQAVCSQKNACKNGOTNCYQSYSTMSITDCRETGSSKYPNCAYKTTQANKHIIVACENFYVPVHFDASV<br/> -----kesaakferqhmdsgnspssSSSNYCNLMCCRKMTQKCKPVNTFVHESLADVKAVCSQKKVTCKNGOTNCYQSKSTMRIIDCRETGSSKYPNCAYKTTQVEKHIIVACGKPSVPVHFDASV</p> <p>SARST: aliSize=121 (resi) RMSD=9.79 (Å)<br/> k-ETAAAKFERQHMDSSTSAASS-NYCNQMMKSRNLTkDRCKPVNTFVHESLADVQAVCSQKNACKNGOTNCYQSYSTMSITDCRETGSSKYPNCAYKTTQANKHIIVACENFYVPVHFDAS-v<br/> -kESAAAKFERQHMD-SGNPSSSNYCNLMCCRKMTQKCKPVNTFVHESLADVKAVCSQKKVTCKNGOTNCYQSKSTMRIIDCRETGSSKYPNCAYKTTQVEKHIIVACGKPSVPVHFDAS-v</p> <p>BLAST: aliSize=107 (resi) iden=81.45% (101/124) simi=86.29% (107/124)<br/> KETAAAKFERQHMDSSTSAASSNYCNQMMKSRNLTkDRCKPVNTFVHESLADVQAVCSQKNACKNGOTNCYQSYSTMSITDCRETGSSKYPNCAYKTTQANKHIIVACENFYVPVHFDASV<br/> KESAAAKFERQHMDSGNPSSSNYCNLMCCRKMTQKCKPVNTFVHESLADVKAVCSQKKVTCKNGOTNCYQSKSTMRIIDCRETGSSKYPNCAYKTTQVEKHIIVACGKPSVPVHFDASV</p> <p>Proposed: aliSize=124 (resi) RMSD=0.91 (Å)<br/> KETAAAKFERQHMDSSTSAASSNYCNQMMKSRNLTkDRCKPVNTFVHESLADVQAVCSQKNACKNGOTNCYQSYSTMSITDCRETGSSKYPNCAYKTTQANKHIIVACENFYVPVHFDASV<br/> KESAAAKFERQHMDSGNPSSSNYCNLMCCRKMTQKCKPVNTFVHESLADVKAVCSQKKVTCKNGOTNCYQSKSTMRIIDCRETGSSKYPNCAYKTTQVEKHIIVACGKPSVPVHFDASV</p>                                                                                                              |
| 13 | <p>1qmpA<br/>(126)</p> <hr/> <p>1dz3A<br/>(123)</p> | C | 89.43 | <p>TM-align: aliSize=106 (resi) RMSD=1.72 (Å)<br/> S1KVC1ADDNRELVSLLDEY1SSQPDMEV1GTAYNGQDCLQMLEEKRPDI1LLI-I1MPHLDGLAVLER1RAGFEHQPNV1MLTA--FGQEdVTKKAVELGAsYF1LKPF-DMEEnlahhi rqvvgktpvv-----<br/> S1KVC1ADDNRELVSLLDEY1SSQPDMEV1GTAYNGQDCLQMLEEKRPDI1LLId1MPHLDGLAVLER1RAGFEHQPNV1MLTAfgQED--VTKKAVELGA-SYF1LKPFDMEnlahhi rqvvgkt</p> <p>SARST: aliSize=116 (resi) RMSD=6.93 (Å)<br/> s-1KVC1ADDNRELVSLLDEY1SSQPDMEV1GTAYNGQDCLQMLEEKRPDI1LLI-I1MPHLDGLAVLER1RAGFEHQPNV1MLTAFGOEDVTKKAVELGASYF1LKPF-D--MENLAHHI1RQ--vygktpvv<br/> -s1KVC1ADDNRELVSLLDEY1SSQPDMEV1GTAYNGQDCLQMLEEKRPDI1LLId1MPHLDGLAVLER1RAGFEHQPNV1MLTAFGOEDVTKKAVELGASYF1LKPFDMEnLAHHI1RQVYGkt-----</p> <p>BLAST: aliSize=122 (resi) iden=99.19% (122/123) simi=99.19% (122/123)<br/> S1KVC1ADDNRELVSLLDEY1SSQPDMEV1GTAYNGQDCLQMLEEKRPDI1LLI-I1MPHLDGLAVLER1RAGFEHQPNV1MLTAFGOEDVTKKAVELGASYF1LKPFDMENLAHHI1RQVYGKtpvv<br/> S1KVC1ADDNRELVSLLDEY1SSQPDMEV1GTAYNGQDCLQMLEEKRPDI1LLId1MPHLDGLAVLER1RAGFEHQPNV1MLTAFGOEDVTKKAVELGASYF1LKPFDMENLAHHI1RQVYGKt---</p> <p>Proposed: aliSize=121 (resi) RMSD=1.33 (Å)<br/> S1KVC1ADDNRELVSLLDEY1SSQPDMEV1GTAYNGQDCLQMLEEKRPDI1LLI-I1MPHLDGLAVLER1RAGFEHQPNV1MLTA-FGQEdVTKKAVELGAsYF1LKPF-DMENLAHHI1RQVYGKtpvv<br/> S1KVC1ADDNRELVSLLDEY1SSQPDMEV1GTAYNGQDCLQMLEEKRPDI1LLId1MPHLDGLAVLER1RAGFEHQPNV1MLTAfgQED-VTKKAVELGA-SYF1LKPFDMENLAHHI1RQVYGKt---</p>                                              |
| 14 | <p>1sncA<br/>(135)</p> <hr/> <p>1sndA<br/>(129)</p> | C | 99.22 | <p>TM-align: aliSize=111 (resi) RMSD=1.64 (Å)<br/> LHKPATL1KAIDGDTVKLMYKGQPMFRLLLVDTPETKHPKKGVEKYGPEASAFSTKKMVENAKKIEVEFDKGORTDKYGRGLAYIYADGKMVNEALVROGLAKVAYVYkpnntHEQHLRKSEAQAQKEKLN1WS-----<br/> LHKPATL1KAIDGDTVKLMYKGQPMFRLLLVDTPETKHPKKGVEKYGPEASAFSTKKMVENAKKIEVEFDKGORTDKYGRGLAYIYADGKMVNEALVROGLAKVAYTH-----EQ-----hlrkseaqakkeklniws</p> <p>SARST: aliSize=127 (resi) RMSD=9.66 (Å)<br/> l-1HKPATL1KAIDGDTVKLMYKGQPMFRLLLVDTPETKHPKKGVEKYGPEASAFSTKKMVENAKKIEVEFDKGORTDKYGRGLAYIYADGKMVNEALVROGLAKVAYVYkpnntHEQHLRKSEAQAQKEKLN1WS-s<br/> -1HKPATL1KAIDGDTVKLMYKGQPMFRLLLVDTPETKHPKKGVEKYGPEASAFSTKKMVENAKKIEVEFDKGORTDKYGRGLAYIYADGKMVNEALVROGLAKVAYT-----HEQHLRKSEAQAQKEKLN1WS-s</p> <p>BLAST: aliSize=129 (resi) iden=100.00% (129/129) simi=100.00% (129/129)<br/> LHKPATL1KAIDGDTVKLMYKGQPMFRLLLVDTPETKHPKKGVEKYGPEASAFSTKKMVENAKKIEVEFDKGORTDKYGRGLAYIYADGKMVNEALVROGLAKVAYVYkpnntHEQHLRKSEAQAQKEKLN1WS<br/> LHKPATL1KAIDGDTVKLMYKGQPMFRLLLVDTPETKHPKKGVEKYGPEASAFSTKKMVENAKKIEVEFDKGORTDKYGRGLAYIYADGKMVNEALVROGLAKVAY-----THEQHLRKSEAQAQKEKLN1WS</p> <p>Proposed: aliSize=129 (resi) RMSD=0.93 (Å)<br/> LHKPATL1KAIDGDTVKLMYKGQPMFRLLLVDTPETKHPKKGVEKYGPEASAFSTKKMVENAKKIEVEFDKGORTDKYGRGLAYIYADGKMVNEALVROGLAKVAYVYkpnntHEQHLRKSEAQAQKEKLN1WS<br/> LHKPATL1KAIDGDTVKLMYKGQPMFRLLLVDTPETKHPKKGVEKYGPEASAFSTKKMVENAKKIEVEFDKGORTDKYGRGLAYIYADGKMVNEALVROGLAKVA-----YTHEQHLRKSEAQAQKEKLN1WS</p> |

|    |                                                           |   |        |                                                                                                                                                                                                                                                                                                                                                                                                                                                                                                                                                                                                                                                                                                                                                                                                                                                                                                                                                                                                                                                                                                                                                                                                                              |
|----|-----------------------------------------------------------|---|--------|------------------------------------------------------------------------------------------------------------------------------------------------------------------------------------------------------------------------------------------------------------------------------------------------------------------------------------------------------------------------------------------------------------------------------------------------------------------------------------------------------------------------------------------------------------------------------------------------------------------------------------------------------------------------------------------------------------------------------------------------------------------------------------------------------------------------------------------------------------------------------------------------------------------------------------------------------------------------------------------------------------------------------------------------------------------------------------------------------------------------------------------------------------------------------------------------------------------------------|
| 15 | <p><b>1wwwX (101)</b></p> <hr/> <p><b>1wwaX (105)</b></p> | N | 100.00 | <p><b>TM-align: aliSize=87 (resi) RMSD=1.23 (Å)</b><br/> vsfpasvqlhtave-----MHHWCIPFSVDGQPAPSLRWLFNGSVLNETSFIFTEFLEPAANETVRHGCLRRLNQPTHVNNNGNYTLAANPFGQASASIMAAAFMDNF-----<br/> -----vsfpasvqlhtaveMHHWCIPFSVDGQPAPSLRWLFNGSVLNETSFIFTEFLEPAANETVRHGCLRRLNQPTHVNNNGNYTLAANPFGQASASIMAAAFMDNF fefn</p> <p><b>SARST: aliSize=99 (resi) RMSD=15.39 (Å)</b><br/> v-SFPASVOLHTAVEMHHWCIPFSVDGQPAPSLRWLFNGSVLNETSFIFTEFLEPAANETVRHGCLRRLNQPTHVNNNGNYTLAANPFGQASASIMAAAFMDNF-----p<br/> -v-SFPASVOLHTAVEMHHWCIPFSVDGQPAPSLRWLFNGSVLNETSFIFTEFLEPAANETVRHGCLRRLNQPTHVNNNGNYTLAANPFGQASASIMAAAFMDNF pfeFn-</p> <p><b>BLAST: aliSize=101 (resi) iden=100.00% (101/101) simi=100.00% (101/101)</b><br/> VSFPASVOLHTAVEMHHWCIPFSVDGQPAPSLRWLFNGSVLNETSFIFTEFLEPAANETVRHGCLRRLNQPTHVNNNGNYTLAANPFGQASASIMAAAFMDNF-----<br/> VSFPASVOLHTAVEMHHWCIPFSVDGQPAPSLRWLFNGSVLNETSFIFTEFLEPAANETVRHGCLRRLNQPTHVNNNGNYTLAANPFGQASASIMAAAFMDNF fefn</p> <p><b>Proposed: aliSize=101 (resi) RMSD=0.68 (Å)</b><br/> VSFPASVOLHTAVEMHHWCIPFSVDGQPAPSLRWLFNGSVLNETSFIFTEFLEPAANETVRHGCLRRLNQPTHVNNNGNYTLAANPFGQASASIMAAAFMDNF-----<br/> VSFPASVOLHTAVEMHHWCIPFSVDGQPAPSLRWLFNGSVLNETSFIFTEFLEPAANETVRHGCLRRLNQPTHVNNNGNYTLAANPFGQASASIMAAAFMDNF fefn</p> |
| 16 | <p><b>1wwwX (101)</b></p> <hr/> <p><b>1wwbX (103)</b></p> | N | 45.54  | <p><b>TM-align: aliSize=84 (resi) RMSD=1.18 (Å)</b><br/> vsfpasvqlhtavem-----HHWCIPFSVDGQPAPSLRWLFNGSVLNETSFIFTEFLEPAANETVRHGCLRRLNQPTHVNNNGNYTLAANPFGQASASIMAAAFMDNF-----<br/> -----vhfaptitflesptSDHHWCIPFTKGNPKPALQFYNGAILNESKYICIKIHVTN--HTEYHGCLQLDNPHTMNGDYTLIAKNEYKDEKQISAHFMGWgid</p> <p><b>SARST: aliSize=97 (resi) RMSD=15.51 (Å)</b><br/> v-SFPASV-QHTAVEMHHWCIPFSVDGQPAPSLRWLFNGSVLNETSFIFTEFLepAANETVRHGCLRRLNQPTHVNNNGNYTLAANPFGQASASIMAAAFMDNF-----p<br/> -vHFAPTITFLESPTSDHHWCIPFTKGNPKPALQFYNGAILNESKYICIKIH--VTNHTHEYHGCLQLDNPHTMNGDYTLIAKNEYKDEKQISAHFMGWgid-</p> <p><b>BLAST: aliSize=65 (resi) iden=47.52% (48/101) simi=64.36% (65/101)</b><br/> VSFPASVOLHTAVEMHHWCIPFSVDGQPAPSLRWLFNGSVLNETSFIFTEFLepAANETVRHGCLRRLNQPTHVNNNGNYTLAANPFGQASASIMAAAFMDNF-----<br/> vhfaptitflesptSDHHWCIPFTKGNPKPALQFYNGAILNESKYICIKIH--HVTNHTHEYHGCLQLDNPHTMNGDYTLIAKNEYKDEKQISAHFMGWgid</p> <p><b>Proposed: aliSize=99 (resi) RMSD=1.10 (Å)</b><br/> VSFPASV-QHTAVEMHHWCIPFSVDGQPAPSLRWLFNGSVLNETSFIFTEFLEPAANETVRHGCLRRLNQPTHVNNNGNYTLAANPFGQASASIMAAAFMDNF-----<br/> vhfaptitflesptSDHHWCIPFTKGNPKPALQFYNGAILNESKYICIKIHVTN--HTEYHGCLQLDNPHTMNGDYTLIAKNEYKDEKQISAHFMGWgid</p>                                      |
| 17 | <p><b>1wwwX (101)</b></p> <hr/> <p><b>1wwcA (105)</b></p> | N | 41.58  | <p><b>TM-align: aliSize=84 (resi) RMSD=1.68 (Å)</b><br/> vsfpasvqlhtave-----MHHWCIPFSVDGQPAPSLRWLFNGSVLNETSFIFTEFLEPAANETVRHGCLRRLNQPTHVNNNGNYTLAANPFGQASASIMAAAFMDNF-----<br/> -----tvyypprvvsleepelRLEHCIEFVRCNPPPTLHWLHNGQPLRESKI HVEYYQE---GEISEGCLLFNKPTHYNNNGNYTLIAKNPLGTANQTINGHELKEfpvde</p> <p><b>SARST: aliSize=96 (resi) RMSD=12.04 (Å)</b><br/> v--SFPASV-QHTAVEMHHWCIPFSVDGQPAPSLRWLFNGSVLNETSFIFTEFLEPAANETVRHGCLRRLNQPTHVNNNGNYTLAANPFGQASASIMAAAFMDNF-----p<br/> -tvYYPRVVSLEEPELRLEHCIEFVRCNPPPTLHWLHNGQPLRESKI HVEYYQEG---EISEGCLLFNKPTHYNNNGNYTLIAKNPLGTANQTINGHELKEfpvde-</p> <p><b>BLAST: aliSize=54 (resi) iden=41.58% (42/101) simi=53.47% (54/101)</b><br/> vsf-----PASVOLHTA-VEHHWCIPFSVDGQPAPSLRWLFNGSVLNETSFIFTEFLEPAANETVRHGCLRRLNQPTHVNNNGNYTLAANPFGQASASIMAAAFMDNF-----<br/> ---tvyypprvvsleepelRLEHCIEFVRCNPPPTLHWLHNGQPLRESKI HVEYYQEG---EISEGCLLFNKPTHYNNNGNYTLIAKNPLGTANQTINGHELKEfpvde</p> <p><b>Proposed: aliSize=97 (resi) RMSD=1.13 (Å)</b><br/> v-SFPASV-QHTAVEMHHWCIPFSVDGQPAPSLRWLFNGSVLNETSFIFTEFLEPAANETVRHGCLRRLNQPTHVNNNGNYTLAANPFGQASASIMAAAFMDNF-----<br/> tvYYPRVVSLEEPELRLEHCIEFVRCNPPPTLHWLHNGQPLRESKI HVEYYQEG---EISEGCLLFNKPTHYNNNGNYTLIAKNPLGTANQTINGHELKEfpvde</p>     |

|    |                                                                   |   |       |                                                                                                                                                                                                                                                                                                                                                                                                                                                                                                                                                                                                                                                                                                                                                                                                                                                                                                                                                                                                                                                                                                                                                                                                                                                                                                                                                                                                                                                                                                                                                                                                                                                                                                                                                                                           |
|----|-------------------------------------------------------------------|---|-------|-------------------------------------------------------------------------------------------------------------------------------------------------------------------------------------------------------------------------------------------------------------------------------------------------------------------------------------------------------------------------------------------------------------------------------------------------------------------------------------------------------------------------------------------------------------------------------------------------------------------------------------------------------------------------------------------------------------------------------------------------------------------------------------------------------------------------------------------------------------------------------------------------------------------------------------------------------------------------------------------------------------------------------------------------------------------------------------------------------------------------------------------------------------------------------------------------------------------------------------------------------------------------------------------------------------------------------------------------------------------------------------------------------------------------------------------------------------------------------------------------------------------------------------------------------------------------------------------------------------------------------------------------------------------------------------------------------------------------------------------------------------------------------------------|
| 18 | <p><b>1dksA</b><br/>(76)</p> <hr/> <p><b>1cksA</b><br/>(74)</p>   | C | 83.78 | <p><b>TM-align:</b> aliSize=61 (resi) RMSD=1.57 (Å)<br/> s-KHQIYYSDKYDDEEFYRHMVLPKDIANKLVPKTHLMSESEWRNLGVQOQSGWVHYMIHEPEphillfrrplpkp-----<br/> -aHKQIYYSDKYFDEHYEYRHVMLPRELSKQVPKTHLMSEEEWRRLGVOQSLGWVHYMIHEPE-----phillfrrplpk</p> <p><b>SARST:</b> aliSize=69 (resi) RMSD=14.87 (Å)<br/> skhq----IYYSDKYDDEEFYRHMVLPKDIANKLVPKTHLMSESEWRNLGVQOQSGWVHYMIHEPEPHILLFRRPLP-kkp<br/> ----ahkqIYYSDKYFDEHYEYRHVMLPRELSKQVPKTHLMSEEEWRRLGVOQSLGWVHYMIHEPEPHILLFRRPLPk---</p> <p><b>BLAST:</b> aliSize=65 (resi) iden=81.08% (60/74) simi=87.84% (65/74)<br/> skh---QIYYSDKYDDEEFYRHMVLPKDIANKLVPKTHLMSESEWRNLGVQOQSGWVHYMIHEPEPHILLFRRPLPKkp<br/> ---ahkQIYYSDKYFDEHYEYRHVMLPRELSKQVPKTHLMSEEEWRRLGVOQSLGWVHYMIHEPEPHILLFRRPLPK--</p> <p><b>Proposed:</b> aliSize=73 (resi) RMSD=1.37 (Å)<br/> s-KHQIYYSDKYDDEEFYRHMVLPKDIANKLVPKTHLMSESEWRNLGVQOQSGWVHYMIHEPEPHILLFRRPLPKp<br/> -aHKQIYYSDKYFDEHYEYRHVMLPRELSKQVPKTHLMSEEEWRRLGVOQSLGWVHYMIHEPEPHILLFRRPLPK--</p>                                                                                                                                                                                                                                                                                                                                                                                                                                                                                                                                                                                                                                                                                                                                                                                                                            |
| 19 | <p><b>4gcrA</b><br/>(174)</p> <hr/> <p><b>1blbA</b><br/>(185)</p> | N | 36.78 | <p><b>TM-align:</b> aliSize=87 (resi) RMSD=1.63 (Å)<br/> -----GKTFYEDRGFOGHCYECSSDCPNLOPY-FSRCNSIRVDSICWMLYERPNOYHOYFLRRCDYDYOOWM--GFNDSIRSCNLPQHTGTFmriyerddfrgqmseitddcpslqdrfhltevhslnvlegswvlyempsyrgqyllrpegyrryldwgamnakvgsllrvmdfy-----<br/> apqplnPKIIFEQENFOGHSHELNGPCPNLKETgVEKAGSVLQAQPIVGYEQANCKGEQVFEKGEYPRWDSWtsSRRTDSLSPKVDSE-----hkitlye</p> <p>-----<br/> nnpftgkkmviddvpsfhahgyqekvsrvrqsqgtwvgyqygyrglqyllekgykdsqdfgapqqvqsvrirdmqw</p> <p><b>SARST:</b> aliSize=167 (resi) RMSD=16.15 (Å)<br/> g-----KTFYEDRGFOGHCYECSSDCPNLOPY-FSRCNSIRVDSICWMLYERPNOYHOYFLRRCDYDYOOWM--MGFNDSIRSCNLPQHTGTFMRRIYERDDFRGMSIITDCCPSLODRFHLTEHSLNVLGSLWVLYEMPSYRGRDYLRPEYRRYLQWGMNAKVGSLRRVM----mdfy<br/> -apqplnPKIIFEQENFOGHSHELNGPCPNLKETgVEKAGSVLQAQPIVGYEQANCKGEQVFEKGEYPRWDSWtsSRRTDSLSPKVDSEHKITLYENPNFTKMEViddvps-FHAHGYQEKSVRQSGTGWGYQYGYRGLDYLLKDYKDSGDFGAPQPOVQSVRRIRdmqw---</p> <p><b>BLAST:</b> aliSize=97 (resi) iden=37.36% (65/174) simi=55.75% (97/174)<br/> g-----KTFYEDRGFOGHCYECSSDCPNLOPY-FSRCNSIRVDSICWMLYERPNOYHOYFLRRCDYDYOOWM--GFNDSIRSCNLPQHTGTFMRRIYERDDFRGMSIITDCCPSLODRFHLTEHSLNVLGSLWVLYEMPSYRGRDYLRPEYRRYLQWGMNAKVGSLRRVM----fy<br/> -apqplnPKIIFEQENFOGHSHELNGPCPNLKETgVEKAGSVLQAQPIVGYEQANCKGEQVFEKGEYPRWDSWtsSRRTDSLSPKVDSEHKITLYENPNFTKMEViddvps-FHAHGYQEKSVRQSGTGWGYQYGYRGLDYLLKDYKDSGDFGAPQPOVQSVRRIRdmqw---</p> <p><b>Proposed:</b> aliSize=171 (resi) RMSD=1.30 (Å)<br/> -----GKTFYEDRGFOGHCYECSSDCPNLOPY-FSRCNSIRVDSICWMLYERPNOYHOYFLRRCDYDYOOWM--GFNDSIRSCNLPQHTGTFMRRIYERDDFRGMSIITDCCPSLODRFHLTEHSLNVLGSLWVLYEMPSYRGRDYLRPEYRRYLQWGMNAKVGSLRRVM----fy<br/> kpqplnPKIIFEQENFOGHSHELNGPCPNLKETgVEKAGSVLQAQPIVGYEQANCKGEQVFEKGEYPRWDSWtsSRRTDSLSPKVDSEHKITLYENPNFTKMEViddvps-FHAHGYQEKSVRQSGTGWGYQYGYRGLDYLLKDYKDSGDFGAPQPOVQSVRRIRdmqw---</p> |
| 20 | <p><b>1cewI</b><br/>(108)</p> <hr/> <p><b>1g96A</b><br/>(111)</p> | N | 39.81 | <p><b>TM-align:</b> aliSize=58 (resi) RMSD=2.19 (Å)<br/> gapvpvdendeglqralqfamaeynrasndkyssrvrvvisakrql-----VSGIKYIQLQVEIGRTTCPKSSGdLQsCEFHDEpEM----AKYTTCTVWVSIPLNQIKLLESKCG--<br/> -----vvgpmdasveeegvr raldfavgeynkasndmyhsralqvvrarkqiVAGVNYFLDVELGRITCTKTPN-----LNCNPFHDqphlKRKAFCSQIYAVPWOGTMTLSKSTCda</p> <p><b>SARST:</b> aliSize=100 (resi) RMSD=19.74 (Å)<br/> g--APVPVDENDEGLQRALQFAMAENRASNDKISSRVVRIISAKRQLVSGIKYIQLQVEIGRTTCPKSSGdLQsCEFHDEPEMA-----KYTTCTVWVSIPLNQIKLLESKCG---q<br/> -vgGPMASVVEEgVRRALDFAVGEYNKASNDMHSRALQVVRARKQIVAGVNYFLDVELGRITCTKTPN-----LNCNPFHDqphlKRKAFCSQIYAVPWOGTMTLSKSTCda</p> <p><b>BLAST:</b> aliSize=76 (resi) iden=45.37% (49/108) simi=70.37% (76/108)<br/> -APVPVDENDEGLQRALQFAMAENRASNDKISSRVVRIISAKRQLVSGIKYIQLQVEIGRTTCPKSSGdLQsCEFHDEPEMAKYTTCTVWVSIPLNQIKLLESKCG--<br/> vgGPMASVVEEgVRRALDFAVGEYNKASNDMHSRALQVVRARKQIVAGVNYFLDVELGRITCTKTPN-----LNCNPFHDqphlKRKAFCSQIYAVPWOGTMTLSKSTCda</p> <p><b>Proposed:</b> aliSize=104 (resi) RMSD=1.45 (Å)<br/> -APVPVDENDEGLQRALQFAMAENRASNDKISSRVVRIISAKRQLVSGIKYIQLQVEIGRTTCPKSSGdLQsCEFHDEPEMA-----KYTTCTVWVSIPLNQIKLLESKCG--<br/> vgGPMASVVEEgVRRALDFAVGEYNKASNDMHSRALQVVRARKQIVAGVNYFLDVELGRITCTKTPN-----LNCNPFHDqphlKRKAFCSQIYAVPWOGTMTLSKSTCda</p>                                                                                                                                                                                                                                                                                                                                                                                                                                                                                                                                     |

|    |                                             |   |       |                                                                                                                                                                                                                                                                                                                                                                                                                                                                                                                                                                                                                                                                                                                                                                                                                                                                                                                                                                                                                                                                                                                                                                                                                                                                                                                                                                                                                                                                                                                                                                                                                                           |
|----|---------------------------------------------|---|-------|-------------------------------------------------------------------------------------------------------------------------------------------------------------------------------------------------------------------------------------------------------------------------------------------------------------------------------------------------------------------------------------------------------------------------------------------------------------------------------------------------------------------------------------------------------------------------------------------------------------------------------------------------------------------------------------------------------------------------------------------------------------------------------------------------------------------------------------------------------------------------------------------------------------------------------------------------------------------------------------------------------------------------------------------------------------------------------------------------------------------------------------------------------------------------------------------------------------------------------------------------------------------------------------------------------------------------------------------------------------------------------------------------------------------------------------------------------------------------------------------------------------------------------------------------------------------------------------------------------------------------------------------|
| 21 | <p>2gmfA (121)</p> <hr/> <p>lhulA (108)</p> | C | 10.19 | <p><b>TM-align:</b> aliSize=77 (resi) RMSD=3.07 (Å)<br/> rspsps tqpWEHVNAIOEARRLNLSrDTa-AEMNETVEVISEMFDLQEPCTLOTRLELYKQGL--RG---SLTKLKGPTMMASHYKHC--Pptpetscaqiitfesfkenlkdfllvipfdcw-----E--P-----<br/> -----IPTSALVKETLALLSTHRTLIIANETLRIPVPHKHNH--QLTEEIFOGIGTLEsqTVqggTVERLTKKYLKIDGOKKCG-----eerrrvnqfldylqeflgVmntewi</p> <p><b>SARST:</b> aliSize=87 (resi) RMSD=14.73 (Å)<br/> rspsps tqp-----WEHVNAIOEARRLNLSrdtaaeMNETVEVISEMFDLQEPCTLOTRLELYKQGLRG---SLTKLKGPTMMASHYKHCnpiPETSCAToiiitfesfkenlkdfll-----lvipfdcwep<br/> -----iptsalvkETLALLSTHRTLIIAN-----ETLRIPVPHKHNHQLCTEELFOGIGTLESQTVqggTVERLTKKYLKIDGOKK----KCGEERRR-----VNQFLDYLOEflgvmntewi-----</p> <p><b>BLAST:</b> aliSize=3 (resi) iden=2.78% (3/108) simi=2.78% (3/108)<br/> rspsps tqpwehvnaiqearrllnlsrdtaaeMNETVEVISEMFDLQEPCTLOTRLELYKQGLRG---SLTKLKGPTMMASHYKHCnpiPETSCAToiiitfesfkenlkdfll-----lvipfdcwep<br/> -----iptsalvkETLALLSTHRTLIIANETLRIPVPHKHNHQLCTEELFOGIGTLESQTVqggTVERLTKKYLKIDGOKK-----KCGEERRR-----VNQFLDYLOEflgvmntewi-----</p> <p><b>Proposed:</b> aliSize=94 (resi) RMSD=2.26 (Å)<br/> rspsps tqp-WEHVNAIOEARRLNLS-RD--taaEMNETVEVISEMFDLQEPCTLOTRLELYKQGL--RG---SLTKLKGPTMMASHYKHCnpiPETSCA-T-OITTFESFKENKDFLLVI---Pfdcwep<br/> -----iPT-SALVKETLALLSTHRTLIIANETLRIPVPHKHNH--QLTEEIFOGIGTLEsqTVqggTVERLTKKYLKIDGOKK-----KCGEERRR-----VNQFLDYLOEflgvmntewi-----</p>                                                                                                                                                                                                                                                                       |
| 22 | <p>lmsbA (115)</p> <hr/> <p>lixxA (129)</p> | M | 13.04 | <p><b>TM-align:</b> aliSize=90 (resi) RMSD=1.94 (Å)<br/> -----SGKKFFVTNHERMPFSKVKALCSEL-R-GTVAIPRNAENKAIQEVAK-----T--SAFLGITDEV-T-EGqfmyvtggrltySNWkkdepndh-----GSGEDVITV--DN-GLNDISQASHAVCE-fpa<br/> dclsgwssYEGHCYKAFEKYKTWEDAERVCTEQakGAHLVSISSGADFVAQLVTqnmkrLdfYIWIIGLRVQGVKQC-----nsewsgsvsyenwIeAESKTLGLEkeTDFRKVNICYGQONPFVCEA--</p> <p><b>SARST:</b> aliSize=91 (resi) RMSD=12.21 (Å)<br/> s-----GKKFFVTNHERMPFSKVKALCSEL--RGTVAIPRNAENKAIQEVAKTSafIgitdeVTEGQFMYVTGGRlTYSNWKKDEpndhsgsedvitiVDNGL-----NDISQASHAVCE-fpa<br/> -dclsgwssYEGHCYKAFEKYKTWEDAERVCTEQakGAHLVSISSGADFVAQLVTQNM-----KRLDFYIWIIGLRVQGVKQCSE-----WSDSsvsyenwIeaesktclgleketdfrkVNICYGQONPFVCEA---</p> <p><b>BLAST:</b> aliSize=27 (resi) iden=13.04% (15/115) simi=23.48% (27/115)<br/> sgkkffvtNhermpfskvkalcseLrgtvaiprnaenkaIQevaktsaf-----GITDEVTEGQFMYVTGGRlTYSNWKKDEpndhsgsedvitiVDNGL-----NDISQASHAVCE-fpa<br/> -----dclsgwssYeghcykafekyktwedaervcteqakgahlvsieSSGADFVAQLVTqnmkrLdfyiwIGLRVQGVKQCSEWSDSSVSYENWIEA-----SKTCLGLEkeTDFRKVNICYGQONPFVCEA---</p> <p><b>Proposed:</b> aliSize=105 (resi) RMSD=1.64 (Å)<br/> -----SGKKFFVTNHERMPFSKVKALCSEL-R-GTVAIPRNAENKAIQEVAK-----T--SAFLGITDEV---TEGQF-MYVTGGRlTYSNWKKDEpndhsgsedvitiVDNGL-----NDISQASHAVCE-fpa<br/> dclsgwssYEGHCYKAFEKYKTWEDAERVCTEQakGAHLVSISSGADFVAQLVTqnmkrLdfYIWIIGLRVQGVKQC--QCNSWSDSSVSYENWIEA-----ESKTLGLEkeTDFRKVNICYGQONPFVCEA--</p>                                                                                                                                                                                                                                      |
| 23 | <p>lmupA (157)</p> <hr/> <p>lobpA (158)</p> | C | 24.84 | <p><b>TM-align:</b> aliSize=119 (resi) RMSD=2.55 (Å)<br/> eeasst---GRNFVVEKINENHTIILASDKREKEDNENRLLFEOIHVL--ENSLVLEKHTVREECSELSMVADNTEKAgEYSVTYDFNITTPKTDYDNFMAHLIN-DEEFOFOMLYGREPDLSSDIKRFRAOICEHGLRENIIDLNSN-----<br/> -----qeeEAEQNLSELSPPRTVYIGSTNPEKIQENCPRTYFRELVFDDekGTVDfYISVKRdGKWKNVHVKITQDDG-TYVADVEGQVVKVLSL-SRTHVAHNINVDKHQOTTELGLFVKL-----nvededlefwkltedkgidkknvvnflene</p> <p>--ANRC<br/> dhPHPE</p> <p><b>SARST:</b> aliSize=143 (resi) RMSD=13.39 (Å)<br/> eeasstgrn-----FVVEKINENHTIILASDKREKEDNENRLLFEOIHVL--NSLVLEKHTVREECSELSMVADNTEKAgEYSVTYDFNITTPKTDYDNFMAHLIN-DEEFOFOMLYGREPDLSSDIKRFRAOICEHGLRENIIDLNSN-----rc<br/> -----qeeEAEQNLSELSPPRTVYIGSTNPEKIQENCPRTYFRELVFDDekGTVDfYISVKRdGKWKNVHVKITQDDG-TYVADVEGQVVKVLSL-SRTHVAHNINVDKHQOTTELGLFVKL-----nvededlefwkltedkgidkknvvnflene</p> <p><b>BLAST:</b> aliSize=79 (resi) iden=31.21% (49/157) simi=50.32% (79/157)<br/> eeasstgrnf-----FVVEKINENHTIILASDKREKEDNENRLLFEOIHVL--NSLVLEKHTVREECSELSMVADNTEKAgEYSVTYDFNITTPKTDYDNFMAHLIN-DEEFOFOMLYGREPDLSSDIKRFRAOICEHGLRENIIDLNSN-----anrc<br/> -----qeeEAEQNLSELSPPRTVYIGSTNPEKIQENCPRTYFRELVFDDekGTVDfYISVKRdGKWKNVHVKITQDDG-TYVADVEGQVVKVLSL-SRTHVAHNINVDKHQOTTELGLFVKL-----nvededlefwkltedkgidkknvvnflene</p> <p><b>Proposed:</b> aliSize=145 (resi) RMSD=1.92 (Å)<br/> eeasstg---RNFVVEKINENHTIILASDKREKEDNENRLLFEOIHVL--ENSLVLEKHTV--DeECSELSMVADNTEKAgEYSVTYDFNITTPKTDYDNFMAHLIN-DEEFOFOMLYGREPDLSSDIKRFRAOICEHGLRENIIDLNSN--N-rC--<br/> -----qeeEAEQNLSELSPPRTVYIGSTNPEKIQENCPRTYFRELVFDDekGTVDfYISVKRdGKWKNVHVKITQDDG-TYVADVEGQVVKVLSL-SRTHVAHNINVDKHQOTTELGLFVKL-----nvededlefwkltedkgidkknvvnflene</p> |



|    |                                               |   |        |                                                                                                                                                                                                                                                                                                                                                                                                                                                                                                                                                                                                                                                                                                                                                                                                                                                                                                                                                                                                                                                                                                                                                                                                                                                                                                                                                                                                                                                                                                                                                                                                                                                                                                                                                                |
|----|-----------------------------------------------|---|--------|----------------------------------------------------------------------------------------------------------------------------------------------------------------------------------------------------------------------------------------------------------------------------------------------------------------------------------------------------------------------------------------------------------------------------------------------------------------------------------------------------------------------------------------------------------------------------------------------------------------------------------------------------------------------------------------------------------------------------------------------------------------------------------------------------------------------------------------------------------------------------------------------------------------------------------------------------------------------------------------------------------------------------------------------------------------------------------------------------------------------------------------------------------------------------------------------------------------------------------------------------------------------------------------------------------------------------------------------------------------------------------------------------------------------------------------------------------------------------------------------------------------------------------------------------------------------------------------------------------------------------------------------------------------------------------------------------------------------------------------------------------------|
| 24 | <p>1f0vA<br/>(124)</p> <p>1h8xA<br/>(125)</p> | N | 60.48  | <p><b>TM-align:</b> aliSize=96 (resi)      RMSD=2.14 (Å)<br/> ketaaakferqhmdsst-----AAAs-SSNYCNQMMKSRNLTQDRCKPVNTFVHESLADVQAVCSOKNVAACKNGQITNCYQSYSTMSITDCRETGSSKYPNCAKTTQANKHIIVACEGNPYvpvhfdasv-----<br/> -----kesaaakferqhmdsgnsPS-sSSTYCNQMMRRRNMTOGRCKPVNTFVHEPLVDVQNVCFQEKVTCKNGGNCYKSNSSMHI TDCRLTNGSRYPNCAVRTSQKERHIIVACEGSPY-----vpvhfdasve</p> <p><b>SARST:</b>      aliSize=98 (resi)      RMSD=18.19 (Å)<br/> k-ETAAAKFERQHMDSSST---SAAAsSSNYCNQMMKSRNLTQDRCKPVNTFVHESLADVQAVCSOKNVAACKN-----QtncyqsysymsitdcretgssKYPNCAKTTQANKHIIVACEGNPYVPVHFDAS--v<br/> -kESAAAKFERQHMDSGNspSSS---TYCNQMMRRRNMTOGRCKPVNTFVHEPLVDVQNVCFQEKVTCKNGGNCYKSNSSMHI TDCRLTNGSRYPNCAVRTSQKERHIIVACEGSPYVPVHFDASve-</p> <p><b>BLAST:</b>      aliSize=104 (resi)      iden=73.39% (91/124)      simi=83.87% (104/124)<br/> KETAAAKFERQHMDSSSTAAAsSSNYCNQMMKSRNLTQDRCKPVNTFVHESLADVQAVCSOKNVAACKNGQITNCYQSYSTMSITDCRETGSSKYPNCAKTTQANKHIIVACEGNPYVPVHFDASV-<br/> KESAAAKFERQHMDSGNSPSSSSTYCNQMMRRRNMTOGRCKPVNTFVHEPLVDVQNVCFQEKVTCKNGGNCYKSNSSMHI TDCRLTNGSRYPNCAVRTSQKERHIIVACEGSPYVPVHFDASVe</p> <p><b>Proposed:</b> aliSize=111 (resi)      RMSD=1.14 (Å)<br/> KETAAAKFERQHMDSSSTAAAsSSNYCNQMMKSRNLTQDRCKPVNTFVHESLADVQAVCSOKNVAACKN-KNGQtNCYQSYSTMSITDCRETGSSKYPNCAKTTQANKHIIVACEGN-----pyvpvhfdasv<br/> KESAAAKFERQHMDSGN-SPSSSSTYCNQMMRRRNMTOGRCKPVNTFVHEPLVDVQNVCFQEKVTCKNGGNCYKSNSSMHI TDCRLTNGSRYPNCAVRTSQKERHIIVACEGSPYVPVHFDASve-----</p>                                                                                                                                                                                                                                                                                                                      |
| 25 | <p>1f0vA<br/>(124)</p> <p>1h8xA<br/>(125)</p> | C | 57.26  | <p><b>TM-align:</b> aliSize=96 (resi)      RMSD=2.14 (Å)<br/> ketaaakferqhmdsst-----AAAs-SSNYCNQMMKSRNLTQDRCKPVNTFVHESLADVQAVCSOKNVAACKNGQITNCYQSYSTMSITDCRETGSSKYPNCAKTTQANKHIIVACEGNPYvpvhfdasv-----<br/> -----kesaaakferqhmdsgnsPS-sSSTYCNQMMRRRNMTOGRCKPVNTFVHEPLVDVQNVCFQEKVTCKNGGNCYKSNSSMHI TDCRLTNGSRYPNCAVRTSQKERHIIVACEGSPY-----vpvhfdasve</p> <p><b>SARST:</b>      aliSize=98 (resi)      RMSD=18.19 (Å)<br/> k-ETAAAKFERQHMDSSST---SAAAsSSNYCNQMMKSRNLTQDRCKPVNTFVHESLADVQAVCSOKNVAACKN-----QtncyqsysymsitdcretgssKYPNCAKTTQANKHIIVACEGNPYVPVHFDAS--v<br/> -kESAAAKFERQHMDSGNspSSS---TYCNQMMRRRNMTOGRCKPVNTFVHEPLVDVQNVCFQEKVTCKNGGNCYKSNSSMHI TDCRLTNGSRYPNCAVRTSQKERHIIVACEGSPYVPVHFDASve-</p> <p><b>BLAST:</b>      aliSize=104 (resi)      iden=73.39% (91/124)      simi=83.87% (104/124)<br/> KETAAAKFERQHMDSSSTAAAsSSNYCNQMMKSRNLTQDRCKPVNTFVHESLADVQAVCSOKNVAACKNGQITNCYQSYSTMSITDCRETGSSKYPNCAKTTQANKHIIVACEGNPYVPVHFDASV-<br/> KESAAAKFERQHMDSGNSPSSSSTYCNQMMRRRNMTOGRCKPVNTFVHEPLVDVQNVCFQEKVTCKNGGNCYKSNSSMHI TDCRLTNGSRYPNCAVRTSQKERHIIVACEGSPYVPVHFDASVe</p> <p><b>Proposed:</b> aliSize=103 (resi)      RMSD=1.20 (Å)<br/> ketaaakferqhmdsstaa-----Ss-SSNYCNQMMKSRNLTQDRCKPVNTFVHESLADVQAVCSOKNVAACKN-KNGQtNCYQSYSTMSITDCRETGSSKYPNCAKTTQANKHIIVACEGNPYVPVHFDASV-<br/> -----kesaaakferqhmdsgnsPS-sSSTYCNQMMRRRNMTOGRCKPVNTFVHEPLVDVQNVCFQEKVTCKNGGNCYKSNSSMHI TDCRLTNGSRYPNCAVRTSQKERHIIVACEGSPYVPVHFDASVe</p>                                                                                                                                                                                                                                                                                                                     |
| 26 | <p>1griA<br/>(211)</p> <p>1fyrA<br/>(95)</p>  | C | 100.00 | <p><b>TM-align:</b> aliSize=66 (resi)      RMSD=1.50 (Å)<br/> meaiakydfkataddelsfkrgei kvqnwykaelngkdgfipknyiempkPWFVFGKIPRAKAEEMLSKQRHDGAFLIRESESAPGDFSLSVKFGNDVQHFVKVLRDGAGKYFLWVVKFNLSNELVDYHRSTSVSRNQQIFLRDIEeqvpqptyvqal fdfdpqedgelgfrgdfihvmdnsdpnwwkg<br/> -----PWFVFGKIPRAKAEEMLSKQRHDGAFLIRESESAPGDFSLSVKFGNDVQHFVKVLRDGAGKYFLWVVKFNLSNELVDYHRSTSVSRNQQIFLRDIE-----</p> <p>achgqtgmfprnyvtpvnrnv-----<br/> -----kfnslnelvdyrstsvsrnqqiflr die</p> <p><b>SARST:</b>      aliSize=93 (resi)      RMSD=11.34 (Å)<br/> meaiakydfkataddelsfkrgei kvqnwykaelngkdgfipknyiempkPWFVFGKIPRAKAEEMLSKQRHDGAFLIRESESAPGDFSLSVKFGNDVQHFVKVLRDGAGKYFLWVVKFNLSNELVDYHRSTSVSRNQQIFLRDIEeqvpqptyvqal fdfdpqedgelgfrgdfihvmdnsdpnww<br/> -----hPWFVFGKIPRAKAEEMLSKQRHDGAFLIRESESAPGDFSLSVKFGNDVQHFVKVLRDGAGKYFLWVVKFNLSNELVDYHRSTSVSRNQQIFLRDIE-----</p> <p>kgachgqtgmfprnyvtpvnrnv-----</p> <p><b>BLAST:</b>      aliSize=95 (resi)      iden=100.00% (95/95)      simi=100.00% (95/95)<br/> meaiakydfkataddelsfkrgei kvqnwykaelngkdgfipknyiempkPWFVFGKIPRAKAEEMLSKQRHDGAFLIRESESAPGDFSLSVKFGNDVQHFVKVLRDGAGKYFLWVVKFNLSNELVDYHRSTSVSRNQQIFLRDIEeqvpqptyvqal fdfdpqedgelgfrgdfihvmdnsdpnwwkg<br/> -----PWFVFGKIPRAKAEEMLSKQRHDGAFLIRESESAPGDFSLSVKFGNDVQHFVKVLRDGAGKYFLWVVKFNLSNELVDYHRSTSVSRNQQIFLRDIE-----</p> <p>achgqtgmfprnyvtpvnrnv-----</p> <p><b>Proposed:</b> aliSize=95 (resi)      RMSD=1.35 (Å)<br/> meaiakydfkataddelsfkrgei kvqnwykaelngkdgfipknyiempkPWFVFGKIPRAKAEEMLSKQRHDGAFLIRESESAPGDFSLSVKFGNDVQHFVKVLRDGAGKYFLWVVKFNLSNELVDYHRSTSVSRNQQIFLRDIEeqvpqptyvqal fdfdpqedgelgfrgdfihvmdnsdpnwwkg<br/> -----PWFVFGKIPRAKAEEMLSKQRHDGAFLIRESESAPGDFSLSVKFGNDVQHFVKVLRDGAGKYFLWVVKFNLSNELVDYHRSTSVSRNQQIFLRDIE-----</p> <p>achgqtgmfprnyvtpvnrnv-----</p> |

|    |                                                     |   |       |                                                                                                                                                                                                                                                                                                                                                                                                                                                                                                                                                                                                                                                                                                                                                                                                                                                                                                                                                                                                                                                                                                                                                                                                                                                                                                                                                                                                                                                                                                                                                                                                                                                                                              |
|----|-----------------------------------------------------|---|-------|----------------------------------------------------------------------------------------------------------------------------------------------------------------------------------------------------------------------------------------------------------------------------------------------------------------------------------------------------------------------------------------------------------------------------------------------------------------------------------------------------------------------------------------------------------------------------------------------------------------------------------------------------------------------------------------------------------------------------------------------------------------------------------------------------------------------------------------------------------------------------------------------------------------------------------------------------------------------------------------------------------------------------------------------------------------------------------------------------------------------------------------------------------------------------------------------------------------------------------------------------------------------------------------------------------------------------------------------------------------------------------------------------------------------------------------------------------------------------------------------------------------------------------------------------------------------------------------------------------------------------------------------------------------------------------------------|
| 27 | <p>lfynA<br/>(62)</p> <hr/> <p>laojA<br/>(60)</p>   | C | 26.67 | <p><b>TM-align:</b> aliSize=37 (resi) RMSD=2.49 (Å)<br/> gtgVTLFVALYDYEARTEDDLSPFHGKGFQILN-SSEGDWwearslltgetg-----Yipsnyvapvd-----<br/> ---KKYAKSKYDFVARNSELSVMDDVLELDDRRQWWK-----vrnasgdsgF-----vpnnildimrtpe</p> <p><b>SARST:</b> aliSize=54 (resi) RMSD=12.51 (Å)<br/> gtgvt--LFVALYDYEARTEDDLSPFHGKGFQILN-SSEGDWWEARSLTTGETGYIPLSNYVAPV----d<br/> ----kkYAKSKYDFVARNSELSVMDDVLEL--LDDRRQWWKVRNASGDSGFVNNILDIMrtpe-</p> <p><b>BLAST:</b> aliSize=29 (resi) iden=26.67% (16/60) simi=48.33% (29/60)<br/> gtgvtlfval-----YDYEARTEDDLSPFHGKGFQILN-SSEGDWWEARSLTTGETGYIPLSN-----yvavpd<br/> -----kkyakskYDFVARNSELSVMDDVLELDDRR-QWVKVRN-ASGDSGFVNNildimrtpe-----</p> <p><b>Proposed:</b> aliSize=54 (resi) RMSD=1.10 (Å)<br/> gtgv-TLFVALYDYEARTEDDLSPFHGKGFQILN--sseGDWWEARSLTTGETGYIPLSNYVAPVD---<br/> ----kkYAKSKYDFVARNSELSVMDDVLELDDr--RQWVKVRN-ASGDSGFVNNILDIMRtpe</p>                                                                                                                                                                                                                                                                                                                                                                                                                                                                                                                                                                                                                                                                                                                                                                                                                  |
| 28 | <p>1k3sA<br/>(109)</p> <hr/> <p>1k3eA<br/>(141)</p> | N | 12.84 | <p><b>TM-align:</b> aliSize=86 (resi) RMSD=2.12 (Å)<br/> esllnrlydalgldepllii-----DDGTQVYFNESD-HTLE-CCPF-PLPD-DILTLOHFRLNYTS----AVTIGADADNTALVALYRLPOTSTE-EEALTFGLFISNVKOKHEHY-----A-----<br/> -----mssrsellekfaekigigsisfnenrlcsfaiDEIYYISLSDANdEYMMiYGVCGKFTdNSNFALEILNANLWFAengGPYLCYEAGAQSLLALRFLLDDATPEKLENEIEVVKSMENYLVLhnqgiTkieeiss</p> <p><b>SARST:</b> aliSize=91 (resi) RMSD=9.77 (Å)<br/> esllnrlyd-----ALGDEPLLIIdgIQVYFNE-SDHTLECCPFPLPD-----IILTLOHFRLNYTSA-VTIGAD-ADNTALVALYRIP---OTSTE-EEALTFGLFISNVKOLKEHY-----a<br/> -----mssrsellekfaekigigsisfnENRCSFAIDEI--YYISLSDANdEYMMiYGVCGKFPtdnsnfAEILNANLWFAENGgPYLCYEaGAQ---SLLAIRfplDDATPEKLENEievVVKSMENLYLVLHNQgitkieeiss-</p> <p><b>BLAST:</b> aliSize=18 (resi) iden=9.43% (10/109) simi=16.98% (18/109)<br/> esllnrlydalgldeplliiddgIQVYFNESDHTLECCPFPLPDdiltlqhflrlnytsavti-----GADADNTALvalyRLP-OTSTE-EEALTFGLFISNVKOLKEHY-----A-----<br/> -----mssrsellekfaekigigsisfnenrlcsfaiDEIYYISLSDANdEYMMiYGVCGKFPtdnsnfAEILNANLWFAENGgPYLCYEAGAQSLLALRFLLDDATPEKLENEIEVVKSMENYLVLhnqgiTkieeiss</p> <p>-----kehya<br/> yvlhnqgitkieeiss-----</p> <p><b>Proposed:</b> aliSize=107 (resi) RMSD=1.75 (Å)<br/> me-----SLENRLYDALGLD--E-P-----LLIIDDGQVYFNESD-HTLECCPFPLPD-DILTLOHFRLNYTS----AVTIGADADNTALVALYRLPOTSTE-EEALTFGLFISNVKOKHEHY-----A-----<br/> --mssrsellekfaekigigsisfnenrlcsfaiDEIYYISLSDANdEYMMiYGVCGKFPtdnsnfAEILNANLWFAENGgPYLCYEAGAQSLLALRFLLDDATPEKLENEIEVVKSMENYLVLhnqgiTkieeiss</p>                                                                                                                                                                                                                           |
| 29 | <p>1cunA<br/>(213)</p> <hr/> <p>2spcA<br/>(107)</p> | C | 15.89 | <p><b>TM-align:</b> aliSize=103 (resi) RMSD=3.03 (Å)<br/> mvhqffrdmdeeswikekklvssedygrdltgvn-LRKKHKLEAELAAHEPNIOSVLD-TG-KKLSdDNTIGK-EEIOORLAOFVDHWKELKOLAAARGORIEESLEYQOFVANVEeEawinekmtlvasedygdltlaaiqglkkheafetdftvhkdrVndvcangedlikknhhveniatak<br/> -----KIDLOLYMRDCELAESWMSAREAFLNADDANA--GNVEALIKKHEDFDKAINGHEQKIAALQTVADQLAQNHYASNLVDEK-----</p> <p>mkgLGKVsDLEKAAAORKALDENSA<br/> ---QV-LE-RWRHLKEGLIEKRSRLGD</p> <p><b>SARST:</b> aliSize=103 (resi) RMSD=27.07 (Å)<br/> mvhqffrdmdeeswikekklvssedygrdltgvnLrkkhkrleaelaahapaiqsvldtgkklssdntigkeeiqrqlaqfvdhwkelqklaaargqr--EESLEYQOFVANVEEFAWINEKMTLVASEDYDITLAAIQGLKKHEAFETDFTVHKDRVNDVCANGEDLIKknhhVENITAKMK<br/> -----qnIDLOLYMRDCELAESWMSAREAFLNADDANAGNVEALIKKHEDFDKAINGHEQKIAALQTVADQLAQNHYASNLVDE</p> <p>GLGKVsDLEKAAAORKALDEN--sa<br/> KRQVLERWRHLKEGLIEKRSRLgd--</p> <p><b>BLAST:</b> aliSize=58 (resi) iden=20.56% (22/107) simi=54.21% (58/107)<br/> mvhqffrdmdeeswikekklvssedygrdltgvnLrkkhkrleaelaahapaiqsvldtgkklssdntigkeeiqrqlaqfvdhwkelqklaaargqrleeEESLEYQOFVANVEEFAWINEKMTLVASEDYDITLAAIQGLKKHEAFETDFTVHKDRVNDVCANGEDLIKknhhVENITAKMK<br/> -----QNIDLOLYMRDCELAESWMSAREAFLNADDANAGNVEALIKKHEDFDKAINGHEQKIAALQTVADQLAQNHYASNLVDE</p> <p>LGKVsDLEKAAAORKALDENsa<br/> VLERWRHLKEGLIEKRSRLGD---</p> <p><b>Proposed:</b> aliSize=105 (resi) RMSD=2.01 (Å)<br/> mvhqffrdmdeeswikekklvssedygrdltgvnLrkkhkrleaelaahapaiqsvldtgkklssdntigkeeiqrqlaqfvdhwkelqklaaargqrleeEESLEYQOFVANVEEFAWINEKMTLVASEDYDITLAAIQGLKKHEAFETDFTVHKDRVNDVCANGEDLIKknhhVENITAKMK<br/> -----QNIDLOLYMRDCELAESWMSAREAFLNADDANAGNVEALIKKHEDFDKAINGHEQKIAALQTVADQLAQNHYASNLVDE</p> <p>GLGKVsDLEKAAAORKALDENSA<br/> KRQVLERWRHLKEGLIEKRSRLGD</p> |

|    |                                                     |   |       |                                                                                                                                                                                                                                                                                                                                                                                                                                                                                                                                                                                                                                                                                                                                                                                                                                                                                                                                                                                                                                                                                                                                                                                                                                                                                                                                                                                                                                                                                                                                                                                                                                                                                                                                                  |
|----|-----------------------------------------------------|---|-------|--------------------------------------------------------------------------------------------------------------------------------------------------------------------------------------------------------------------------------------------------------------------------------------------------------------------------------------------------------------------------------------------------------------------------------------------------------------------------------------------------------------------------------------------------------------------------------------------------------------------------------------------------------------------------------------------------------------------------------------------------------------------------------------------------------------------------------------------------------------------------------------------------------------------------------------------------------------------------------------------------------------------------------------------------------------------------------------------------------------------------------------------------------------------------------------------------------------------------------------------------------------------------------------------------------------------------------------------------------------------------------------------------------------------------------------------------------------------------------------------------------------------------------------------------------------------------------------------------------------------------------------------------------------------------------------------------------------------------------------------------|
| 30 | <p>1wu3I<br/>(161)</p> <hr/> <p>1i1kA<br/>(151)</p> | C | 9.93  | <p><b>TM-align:</b> aliSize=99 (resi) RMSD=3.88 (Å)<br/> iny-----KQLqLQeRTNIRKCOELLEOLNGKINL-TYRADFKIPMEMT--KMQkSYTAF AIOEMLNVFL-VFRNFSSTGWNETIIVR LDELHQOTVFKTVLEEKQEEERltwemsstalhlksyywrvqrylklmkynsyawmvvraeifrnfliirrltrnfqn-----skaveqvknafnklqekgiy<br/> -----nscthfPG-NL-PNMLRDLRDAFSRVKTFQMKDQLDNLKESLLdfFKG-YLGCQALSEMIQFYLEeVMPQAEHQDPDIKAHNSGENKTLRLRIRChRFLPCENK-----</p> <p>kamsefdifinyieaymtki<br/>rn---</p> <p><b>SARST:</b> aliSize=117 (resi) RMSD=20.12 (Å)<br/> inykqlqlqertnirkcqeelleqngkinltyradfkpme-MTEKMQKSYTAF AIOEMLNVFL-VFRNFSSTGWNETIIVR LDELHQOTVFKTVLEEKQEEERLTWE--MSSTALHLKSYWVRYLKLKMYN-----SYAWMVRAEIFRNFLIIRRLTRN-----<br/> -----nscthfPG-NL-PNMLRDLRDAFSrvkTFQMKDqLDNLLKESLLEDFKGYLGCQALSEMIQFYLEEVMPQAEHQdpDIKAHVNSLGENLKTLLRLRChRF1pcenkskaVEQVKNAFNKLOEKG IYKAMSEFDifinyieaymtki</p> <p>--fqn<br/>rn---</p> <p><b>BLAST:</b> aliSize=60 (resi) iden=19.21% (29/151) simi=39.74% (60/151)<br/> inykql-----OQERT-NIRKCOELLEOLNGKINLTYRADfkpmeMTEKmqksyta AIOEML--NVFLVFRNFSSTGWNETIIVR LDELHQatvFLKTVLEEKQEEERltwemsstalhlksyWVRYLKLKMYN-SYAWMVVRAE-aeifrnfliirrl<br/> -----nscthfpgnlpnmlrdlrdafsrvkTFQMKDqLDNLLKESLLEDFKGYLGCQALS-----MIQ-----VLEEVMPQAEHQDPDIKAHVNSLGENLKTLLRLRChRF---FLPCENKSKAVEQV--KNAFNKQEGIKAMSEFDIFINIEAYMTKIrn-----</p> <p>trnfqn<br/>-----</p> <p><b>Proposed:</b> aliSize=131 (resi) RMSD=2.80 (Å)<br/> iny-----KQ-qLQERTNIRKCOELLEqLNG-kIN--lTYRADFKIPMEMT--kMQ-ksYTAF AIOEMLNVFL-VFRNFSSTGWNETIIVR LDELHQOTVFKTVLEEKQEEERLTWemsstALHLKSYWVRYLKLKMYN-SYAWMVVRAE-IFRNFLIIRRLTRNFQ-<br/> -----nscthfPGn--PNMLRDLRDAFSRVK--TFf-QMKd--QLDNLKESLLdf-KGy--LGCQALSEMIQFYLEeVMPQAEHQDPDIKAHNSGENKTLRLRIRChrf-----LPCEN-K---SKAVEQVKNAFNKL-Q---E---KgIYKAMSEFDIFINIEAYMTKIrn-----</p> |
| 31 | <p>1vjqa<br/>(73)</p> <hr/> <p>2i9sA<br/>(97)</p>   | C | 9.59  | <p><b>TM-align:</b> aliSize=63 (resi) RMSD=2.39 (Å)<br/> -----KTIFVIVPT-N---EeQV-AFLEALAKQ-D--ELNFDWqNPPTePGqPVVILI-PSD-VEWFLE-KAK--GIPFIVYVEeggs-----<br/> gpgkpesilkmtkkgkTLMMFVTVsgnptek-ETeEITSLWQGSIFnaNYDVQR-FIVG-SD-RAIFMLrDGSyAWEIKDFVVSQdrCAEVILEGQ----mypgk</p> <p><b>SARST:</b> aliSize=35 (resi) RMSD=4.22 (Å)<br/> ktifviviptneeqvaflealakqdelnfdwqnp-----EPEQPVVILIP-----SDVEWFLELAKAGIPFTVYVEE-----gs<br/> -----gpgkpesilkmtkkgkTLMMFVTVsgnpteketeEITSLWQGSIFnaNYDVQRFIVsdraifmlrdgsyaweikdfivsqrcaevtleqmypgk--</p> <p><b>BLAST:</b> aliSize=6 (resi) iden=7.04% (5/73) simi=8.45% (6/73)<br/> ktifviviptneeqvaflealakqdelnfdwqnppte-PEQPVVILIP-----SDVEWFLELAKAGIPFTVYVEE-----ipsdvewflelkaagipftvyveeggs<br/> -----gpgkpesilkmtkkgkTLMMFVTVsgnpteketeEITSLWQGSIFnaNYDVQRFIVsdraifmlrdgsyaweikdfivsqrcaevtleqmypgk-----</p> <p><b>Proposed:</b> aliSize=72 (resi) RMSD=2.55 (Å)<br/> -----N-TIFVIVPT-N---EeQVAFLEALAKQ-D-ELNFDWqNPPTePGQPVVILIPSDMVEWFLEMKAK--GIPFIVYVEEG-ES<br/> gpgkpesilkmtkkgkTLMMFVTVsgnptekETEITSLWQGSIFnaNYDVQR-FIVGSDRAIFMLRDSYAWWEIKDFVVSQdrCAEVILEGQMYpgk</p>                                                                                                                                                                                                                                                                                                                                                                                                                                                                                                                                                                                                                                         |
| 32 | <p>2d8dA<br/>(80)</p> <hr/> <p>2gtvX<br/>(104)</p>  | N | 11.25 | <p><b>TM-align:</b> aliSize=65 (resi) RMSD=1.86 (Å)<br/> eriqalrk-----EVdrVNreILrILSERGRIVQEIIGRLQTELGLPHYDPKREEEMLAYLTAEN--PGPFpDETIRKLFKEIFKASL-----<br/> -----mieklAEIRKKIDEIDNKIkarwpwaeLIAERNSLAKDVAEIKNQLGIPINDFEREKYIYDRIRKLCkEhNVD-ENIGIKIFORLIEHNKAlqkyleetleh</p> <p><b>SARST:</b> aliSize=73 (resi) RMSD=9.32 (Å)<br/> eriqal---RKEVDVNRREIRLL-----SERGRIVQEIIGRLQTELGLPHYDPKREEEMLAYLTAENPGPFpDETIRKLFKEIFKAS-----l<br/> -----mieklAEIRKKIDEIDNKIkarwpwaeLIAERNSLAKDVAEIKNQLGIPINDFEREKYIYDRIRKLCkEhNVDENIGIKIFORLIEHNKAlqkyleetleh</p> <p><b>BLAST:</b> aliSize=51 (resi) iden=30.00% (24/80) simi=63.75% (51/80)<br/> --RIQALRKEVDRVNRREIR-----LLSERGRIVQEIIGRLQTELGLPHYDPKREE---EMLAYLTAENPGPFpDETIRKLFKEIFKAS-----asl<br/> mieklAEIRKKIDEIDNKIkarwpwaeLIAERNSLAKDVAEIKNQLGIPINDFEREKYIYDRIRKLCkEhNVDENIGIKIFORLIEHNKAlqkyleetleh---</p> <p><b>Proposed:</b> aliSize=72 (resi) RMSD=2.28 (Å)<br/> --RIQALRKEVDRVNRREIR-----LRLLSERGRIVQEIIGRLQTELGLPHYDpkREEMLAYLTAEN--PG-----P--FPDETIRKLFKEIFKASL-----<br/> mieklAEIRKKIDEIDNKIkarwpwaeLIAERNSLAKDVAEIKN-QL----GIPIN---DFEREKYIYDRIRKLCkEhNVDENIGIKIFORLIEHNKALQKqyleetleh</p>                                                                                                                                                                                                                                                                                                                                                                                                                                                                                                                                                                                                  |

|    |                                                    |   |       |                                                                                                                                                                                                                                                                                                                                                                                                                                                                                                                                                                                                                                                                                                                                                                                                                                                                                                                                                                                                                                                                                                                                                                                  |
|----|----------------------------------------------------|---|-------|----------------------------------------------------------------------------------------------------------------------------------------------------------------------------------------------------------------------------------------------------------------------------------------------------------------------------------------------------------------------------------------------------------------------------------------------------------------------------------------------------------------------------------------------------------------------------------------------------------------------------------------------------------------------------------------------------------------------------------------------------------------------------------------------------------------------------------------------------------------------------------------------------------------------------------------------------------------------------------------------------------------------------------------------------------------------------------------------------------------------------------------------------------------------------------|
| 33 | <p>2d8dA<br/>(80)</p> <hr/> <p>1q6aA<br/>(107)</p> | N | 11.25 | <p><b>TM-align:</b> aliSize=61 (resi)      RMSD=2.40 (Å)<br/> eriqalrkevdr-----VNREiLRLLSERGRVQVEIGRLQTeIgLPHYD-PKREEMLAYLTAEN--PpPDeTIRKLFKEIFKASL-----<br/> -----amarmspadkrklldelrsiyrtivleyfntdakvNERIDFVSKAFFAD---ISVSOvLEIHVELMDTFSKQLKIEIR-SE-DILLDYRLTLIDVIAhlcemyrrsiprev</p> <p><b>SARST:</b>      aliSize=59 (resi)      RMSD=11.11 (Å)<br/> er-----IQALRKVDRVNRE-----ILRLLSERGRVQVEIGRLQTELPLP---HYDPKREEMLAY----LTAENIG--pfpdetirklfkeifkasl<br/> --amarmspadkrklldelrsiyrtivleyfntdakvNERIDFVSKAFFADsVSOVLEIHVELMDTFSKQLKIEIRSEdILLDYRLTLIDVIAhlcemyRRSIRRev-----</p> <p><b>BLAST:</b>      aliSize=0 (resi)      iden=0.00% (0/80)      simi=0.00% (0/80)<br/> eriqalrkevdrvnreilrllsergrlvqeigrqltelglphypkreeemlayltaenpgpfpdetirklfkeifkasl-----<br/> -----amarmspadkrklldelrsiyrtivleyfntdakvneridefvskaffadisvsqvleihvelmdtfskqlklegrsedilldyrltlidviahlcemyrrsiprev</p> <p><b>Proposed:</b> aliSize=75 (resi)      RMSD=1.73 (Å)<br/> -----ERIQALRKVDRVNREILRLL-----SERGRVQVEIGRLQTeIgLPHYD-PKREEMLAYLTAEN--PpPDeTIRKLFKEIFKASL-----<br/> amarmsPADKRKLLDRLSYRTIVLEYfntdakvNERIDFVSKAFFAD---ISVSOvLEIHVELMDTFSKQLKIEIR-SE-DILLDYRLTLIDVIAhlcemyrrsiprev</p> |
| 34 | <p>2c5jA<br/>(82)</p> <hr/> <p>2c5iT<br/>(94)</p>  | C | 62.20 | <p><b>TM-align:</b> aliSize=56 (resi)      RMSD=2.82 (Å)<br/> DPFQVVKDTKEQLNRINNYITRHNTa---EEEIQDILKDVVEETIVDLDRSIVMKRDENEDVSGREAQVKNIKQQLDALKLRF-----<br/> DPFQVVKDTKEQLNRINNYITRHNTI-agdDDQEEIQQDILKDVVEETIVDLDRSIVKRD-----enedvsgreaqvknikqldalklrfdrriquest</p> <p><b>SARST:</b>      aliSize=80 (resi)      RMSD=22.65 (Å)<br/> d--PFQVVKDTKEQLNRINNYITRHNTA---TAEIIIQDILKDVVEETIVDLDRSIVMKRDE-----NEDVSGREAQVKNIKQQLDALKLRF-----d<br/> -dPFQVVKDTKEQLNRINNYITRHNTaGDDQEEIQQDILKDVVEETIVDLDRSIVKRDenedVSGREAQVKNIKQQLDALKLRFDRRIquest-</p> <p><b>BLAST:</b>      aliSize=81 (resi)      iden=98.78% (81/82)      simi=98.78% (81/82)<br/> DPFQVVKDTKEQLNRINNYITRHNTA-----EEEIQDILKDVVEETIVDLDRSIVMKRDENEDVSGREAQVKNIKQQLDALKLRF-----<br/> DPFQVVKDTKEQLNRINNYITRHNTAgdddqEEEIQDILKDVVEETIVDLDRSIVKRDENEDVSGREAQVKNIKQQLDALKLRFdrriquest</p> <p><b>Proposed:</b> aliSize=81 (resi)      RMSD=0.89 (Å)<br/> DPFQVVKDTKEQLNRINNYITRHNTa-----EEEIQDILKDVVEETIVDLDRSIVMK-----RDENEDVSGREAQVKNIKQQLDALKLRF--<br/> DPFQVVKDTKEQLNRINNYITRHNT-TagdddqEEEIQDILKDVVEETIVDLDRSIVMKrdeneVSGREAQVKNIKQQLDALKLRFDRRIQEst</p>                                                              |
| 35 | <p>2c5jA<br/>(82)</p> <hr/> <p>1lvfA<br/>(106)</p> | C | 15.85 | <p><b>TM-align:</b> aliSize=63 (resi)      RMSD=2.50 (Å)<br/> -----DPFQVVKDTKEQLNRINNYIT--RHNTa---EEEIQDILKDVVEETIVDLDRSIVMKRDENEDVSGREAQVKNIKQQLDALKLRF-----<br/> edpffvkvGKVAVNTAAGLQFQWTELLQgpSAA--tREEIDWTTNELRNLRSEWDLDELDETISIVEANPR-K-----fnldatelsirkafitstrqivrmdkqmsas</p> <p><b>SARST:</b>      aliSize=80 (resi)      RMSD=20.77 (Å)<br/> d-----PFQVVKDTKEQLNRINNYITRHNTA---TAEIIIQDILKDVVEETIVDLDRSIVMKRDENE-----DVSGREAQVKNIKQQLDALKLRF--d<br/> -edpffvkvGKVAVNTAAGLQFQWTELLQgpSaAtREEIDWTTNELRNLRSEWDLDELDETISIVEANprkfnldateLSIRKAFITSTRQIVRDMKDQMSas-</p> <p><b>BLAST:</b>      aliSize=35 (resi)      iden=25.61% (21/82)      simi=42.68% (35/82)<br/> --DPFQVVKDTKEQLNRINNYITRHNTA---TAEIIIQDILKDVVEETIVDLDRSIVMKRDENEDVSGREAQVKNIKQQLDALKLRF-----rfd<br/> eDPFFVVKGEVOKAVNTAAGLQFQWTELLQGPSAATREEIDWTTNELRNLRSEWDLDELDETISIVEANPR--KFNLDATELsirkafitstrqivrmdkqmsas---</p> <p><b>Proposed:</b> aliSize=82 (resi)      RMSD=1.74 (Å)<br/> --DPFQVVKDTKEQLNRINNYITRHNTA-----EEEIQDILKDVVEETIVDLDRSIVMK-----RDENEDVSGREAQVKNIKQQLDALKLRF--<br/> eDPFFVVKGEVOKAVNTAAGLQFQWTELLQgpSaAtreeidwtTNELRNLRSEWDLDELDETISIVEANprkfnldATELSIRKAFITSTRQIVRDMKDQMSAS</p>   |

|    |                                                    |   |       |                                                                                                                                                                                                                                                                                                                                                                                                                                                                                                                                                                                                                                                                                                                                                                                                                                                                                                                                                                                                                                                                                                                                                                                                         |
|----|----------------------------------------------------|---|-------|---------------------------------------------------------------------------------------------------------------------------------------------------------------------------------------------------------------------------------------------------------------------------------------------------------------------------------------------------------------------------------------------------------------------------------------------------------------------------------------------------------------------------------------------------------------------------------------------------------------------------------------------------------------------------------------------------------------------------------------------------------------------------------------------------------------------------------------------------------------------------------------------------------------------------------------------------------------------------------------------------------------------------------------------------------------------------------------------------------------------------------------------------------------------------------------------------------|
| 36 | <p>2c5jA<br/>(82)</p> <hr/> <p>2jmhA<br/>(117)</p> | C | 7.32  | <p><b>TM-align:</b> aliSize=55 (resi) RMSD=2.29 (Å)<br/> -----DP-FQQVVKDTKEQLNRINNYITRHNTa----EEEIQDILKDVEETIVDLDRSIIVM-KrDeneDvsgraeqvknkqldalklrfd<br/> qehkpkddfrnefdhllieqanhaiekgehqllylqhqldeInenkskelqekiireldvvcamiegaGALERELKRTDL--niLeRFNYEAQTLISKILLKDLKETEOKVkd-IQ--TQ-----</p> <p><b>SARST:</b> aliSize=80 (resi) RMSD=18.52 (Å)<br/> d-----PFQV---VDTKEQLNRINNYITRHNTAEEI---QDILKDVEETIVDLDRSIIVMKRDENED---VSGREAQVKNIKQQLDALKLRF-----d<br/> -qehkpkddfrnefdhllieqanhaiekGEHQLLYLOHQLDELNENKSKLEKEKIIRELDVVCAMIEGAQGALERELKRTdInLERFNYEAQTLISKILLKDLKeteqvkdiqtq-</p> <p><b>BLAST:</b> aliSize=19 (resi) iden=13.41% (11/82) simi=23.17% (19/82)<br/> dpfqvkvdt-----KEQLNRIN-NYITRHNTAEEIQD--ILKDVEETI-----ivldrsiivmkrdenedvsgraeqvknkqldalklrfd<br/> -----qehkpkddfrnefdhllieqanhaiekgehqllylqhqldeInenkskelqekiireldvvcamiegaqgaLERELKRTDINLERFNYEAQTLISKILLKDLKETEteqvkdiqtq-----</p> <p><b>Proposed:</b> aliSize=73 (resi) RMSD=1.75 (Å)<br/> -----DPFQQVVKDTKEQLNRINNYITrhntaeEEIQDILKDVEETIV-DLDRSIIVMKRDENEDVS-----GREAQVKNIKQQLDALKLRFD-----<br/> qehkpkddfrnefdhllieqanhaiekGEHQLLYLOHQLDELNENK-----SKLEQEKIIRELDVVCAMIEGAQGALERELKRTdInilerfnyEAQTLISKILLKDLKETEOKVkdigtq</p>  |
| 37 | <p>2c5jA<br/>(82)</p> <hr/> <p>1hx1B<br/>(112)</p> | C | 4.88  | <p><b>TM-align:</b> aliSize=43 (resi) RMSD=1.98 (Å)<br/> dpfqvkvdtkeqlnrinnyitrhntaeEiqDILKDVEETIVDLDRSIIVMKRDENEDVSGREAQVKNIKQQLDALKLRF-----<br/> -----G--NSPOEEVILKCLKHLEKSVKIDADOLEELNKLGTGIQGG--FLP-----kdlqaealcldrrvkatieqfmkileeidTliipenfksrkrkglvkvqaflaecdteqnicqe</p> <p><b>SARST:</b> aliSize=77 (resi) RMSD=18.87 (Å)<br/> d-----PFQVVKDTKEQLNRINNYITRHNTAEEI---QDILKDVEETIVDLDRSIIVMK-----RDENEDVSGREAQVKNIKQQLDALK-----lrfd<br/> -gnspqeevelkklkhLEKSVKIDADOLEELNKLGTGIQggfLpklQAEALCKIDRRVKATIEQFMKILEEIdTliipenfksrLKRKGLVKKVQAFLAECdtveqnicqe---</p> <p><b>BLAST:</b> aliSize=21 (resi) iden=14.63% (12/82) simi=25.61% (21/82)<br/> dpfqv-----VKDTKEQ---NRINNYITRHNTAEEI---QDILKDVEETIVDL-----rsiivmkrdenedvsgraeqvknkqldalklrfd<br/> -----gnspqeevelkklkhleksvekiadqleelnkelgtiqggfLpklqaealcldrrvKATIEQfmiLEEIDTLIPENFKDSRLkrKGLVKKVQAFLAECdtveqnicqe-----</p> <p><b>Proposed:</b> aliSize=76 (resi) RMSD=1.70 (Å)<br/> -----DPFQQVVKDTKEQLNRINNYITrh-ntaE-EEIQDILKDVEETIVDLDRSIIVMKRDENE-----DVSREAQVKNIKQQLDALKLRFD-----<br/> gnspqeevelkklkhleksvEKIADOLEELNKLGTGIQGG---F1---PkDLQAEALCKIDRRVKATIEQFMKILEEIDTliipenfksrLKRKGLVKKVQAFLAECdtveqnicqe</p>                          |
| 38 | <p>1wz3A<br/>(84)</p> <hr/> <p>1gnuA<br/>(117)</p> | C | 17.86 | <p><b>TM-align:</b> aliSize=54 (resi) RMSD=2.19 (Å)<br/> -----OKIVHLRAT--GG-APIKQSKFKVSGSKDFANVIDFLRRQLHS-D--SLFVYVNSAfsnpndesvidlynnfgdglvnyacsm-----AW-----<br/> mkfvvykeehpfekrrsegekirrkypDRVPVIVEKAPKArIGDIDKKKYLMPSDLTVGQFYFLIRKRILrAedALFFVNNV-----ipptsatmglyqehhEEdfflyiaysdesvygl</p> <p><b>SARST:</b> aliSize=81 (resi) RMSD=13.64 (Å)<br/> q-----KIVHLRATGG--PIKQSKFKVSGSKDFANVIDFLRRQLSDSLFVYVNSA--FSNPDESVIDLYNNFGFD-GKIVVNIACSM----aw<br/> -mkfvvykeehpfekrrsegekirrkypdrVPVIVEKAPKArIGDIDKKKYLMPSDLTVGQFYFLIRKRILRAEDALFFVNNVVIPTSATMGQLYQEHHEdFFLYIAYSDESvygl--</p> <p><b>BLAST:</b> aliSize=28 (resi) iden=19.05% (16/84) simi=33.33% (28/84)<br/> qkivvhlratgga-----KIVHLRATGG--PIKQSKFKVSGSKDFANVIDFLRRQLSDSLFVYVNSA--FSNPDESVIDLYNNFGFD-GKIVVNIACSM----aw<br/> -----mkfvvykeehpfekrrsegekirrkypdrVPVIVEKAPKArIGDIDKKKYLMPSDLTVGQFYFLIRKRILRAEDALFFVNNVVIPTSATMGQLYQEHHEdFFLYIAYSDESvygl-----</p> <p><b>Proposed:</b> aliSize=82 (resi) RMSD=1.60 (Å)<br/> -----OKIVHLRAT--GGAPIKQSKFKVSGSKDFANVIDFLRRQLHS-D--SLFVYVNSAfsnpndesvidlynnfgdglvnyacsmaw<br/> mkfvvykeehpfekrrsegekirrkypDRVPVIVEKAPKArIGDIDKKKYLMPSDLTVGQFYFLIRKRILRAedALFFVNNVVIPTSATMGQLYQEHHEdFFLYIAYSDESvygl--</p> |

|    |               |   |       |                                                                                                                                                                                                                                                                                                                                                                                                                                                                                                                                                                                                                                                                                                                                                                                                                                                                                                                                                                                                                                                                                                                                                                                                 |
|----|---------------|---|-------|-------------------------------------------------------------------------------------------------------------------------------------------------------------------------------------------------------------------------------------------------------------------------------------------------------------------------------------------------------------------------------------------------------------------------------------------------------------------------------------------------------------------------------------------------------------------------------------------------------------------------------------------------------------------------------------------------------------------------------------------------------------------------------------------------------------------------------------------------------------------------------------------------------------------------------------------------------------------------------------------------------------------------------------------------------------------------------------------------------------------------------------------------------------------------------------------------|
| 39 | 1wz3A<br>(84) | C | 17.86 | <p><b>TM-align:</b> aliSize=54 (resi) RMSD=2.15 (Å)<br/> -----OKIVHLRAT--GGAPILKQSKFKVSGSDKFNVIDFLRRQL-HSD--SLFVYVNSAfsnpndesvidlynnfgdglvnyacsm-----AW-----<br/> mkwmfkedhslhrcvesakirakypDRVPIVEKVSgSQIVDIDKRYLPSDITVQFMWIRKRIqLPSekAIFLFDKTI-----vpqsslmgqlyekekeDEdglfylvaysgentfg</p> <p><b>SARST:</b> aliSize=78 (resi) RMSD=12.35 (Å)<br/> q-----KIVHLRATGGA--PIIKQSKFKVSGSDKFNVIDFLRRQLHSD--SLFVYVNSA--FSPNPDESVIDLYNNFGF--DGKLVVNYA-----csmaw<br/> -mkwmfkedhslhrcvesakirakypdRVPPIVEKVSgSQIVDIDKRYLPSDITVQFMWIRKRIQLPEKAIIFLFDKTI--VQSSSLTMGQLYEKEKDeXGFLYAYSgentfg-----</p> <p><b>BLAST:</b> aliSize=39 (resi) iden=23.81% (20/84) simi=46.43% (39/84)<br/> q-----KIVHLRATGGA--PIIKQSKFKVSGSDKFNVIDFLRRQLHSD--SLFVYVNSAfsnpndesvidlynnfgdglvnyacsm-----csmaw<br/> -mkwmfkedhslhrcvesakirakypdRVPPIVEKVSgSQIVDIDKRYLPSDITVQFMWIRKRIQLPEKAIIFLFDKTI--VQSSSLTMGQLYEKEKDeXGFLYAYSgentfg-----</p> <p><b>Proposed:</b> aliSize=80 (resi) RMSD=1.46 (Å)<br/> -----OKIVHLRAT--GGAPILKQSKFKVSGSDKFNVIDFLRRQL-HSD--SLFVYVNSAFSPNPDESVIDLYNNFGF--DGKLVVNYAC-S---maw<br/> mkwmfkedhslhrcvesakirakypDRVPIVEKVSgSQIVDIDKRYLPSDITVQFMWIRKRIqLPSekAIFLFDKTI--VQSSSLTMGQLYEKEKDeXGFLYAYSgentfg---</p> |
| 40 | 1wz3A<br>(84) | C | 21.43 | <p><b>TM-align:</b> aliSize=54 (resi) RMSD=2.02 (Å)<br/> -----OKIVHLRAT--GGAPILKQSKFKVSGSDKFNVIDFLRRQLHSD--SLFVYVNSAfsnpndesvidlynnfgdglvnyacsm-----AW-----<br/> gfqykedhpfeyrkegekirkkypDRVPIVEKAPKARVVDIDKRYLPSDLTVGQFYFLIRKRIHLrPeDALFFVNNNT-----ipptsatmgqlyednhEEdyflyvaysd</p> <p><b>SARST:</b> aliSize=78 (resi) RMSD=12.25 (Å)<br/> q-----KIVHLRATGGA--PIIKQSKFKVSGSDKFNVIDFLRRQLHSD--SLFVYVNSA--FSPNPDESVIDLYNNFGF--DGKLVVNYA--csmaw<br/> -gfqykedhpfeyrkegekirkkypdRVPPIVEKAPKARVVDIDKRYLPSDLTVGQFYFLIRKRIHLrPeDALFFVNNNTIPPTSATMGQLYEDNHEEYFLYAYSd-----</p> <p><b>BLAST:</b> aliSize=39 (resi) iden=28.57% (24/84) simi=46.43% (39/84)<br/> qkivvhlratgga-----PIIKQSKFKVSGSDKFNVIDFLRRQLHSD--SLFVYVNSAfsnpndesvidlynnfgdglvnyacsm-----csmaw<br/> -----gfqykedhpfeyrkegekirkkypdrvpivekAPKARVVDIDKRYLPSDLTVGQFYFLIRKRIHLrPeDALFFVNNNTIPPTSATMGQLYEDNHEEYFLYAYSd-----</p> <p><b>Proposed:</b> aliSize=79 (resi) RMSD=1.35 (Å)<br/> -----OKIVHLRAT--GGAPILKQSKFKVSGSDKFNVIDFLRRQLHSD--SLFVYVNSAFSPNPDESVIDLYNNFGF--DGKLVVNYACsmaw<br/> gfqykedhpfeyrkegekirkkypDRVPIVEKAPKARVVDIDKRYLPSDLTVGQFYFLIRKRIHLrPeDALFFVNNNTIPPTSATMGQLYEDNHEEYFLYAYSd-----</p>                                |
| 41 | 1wz3A<br>(84) | C | 10.71 | <p><b>TM-align:</b> aliSize=50 (resi) RMSD=2.42 (Å)<br/> -----OKIVHLRATGGAPILKQSKFKVSGSDKFNVIDFLRRQLHSD--SLFVYV--NSAfsnpndesvidlynnfgdglvnyacsmaw-----<br/> msggtaattagSKVTFKITLISDPKLP-FKVLSPPESTPTAVLKAFAEEFKVPaaTSAIITndgVG-----vnpaqpagniflkhgselrliipdrvgh</p> <p><b>SARST:</b> aliSize=72 (resi) RMSD=12.54 (Å)<br/> qk-----IVHLRATGG---APIIKQSKFKVSGSDKFNVIDFLRRQLHSD--DSLFLVNSAFSPNPDESVIDLYNNFGFDGKLVVN-----yacsma<br/> --msggtaattagSKVTFKITLISDPKLP-FKVLSPPESTPTAVLKAFAEEFKVPaaTSAIITNDGVGvnpaqpagniflkhgSELRLIPdrvgh-----</p> <p><b>BLAST:</b> aliSize=0 (resi) iden=0.00% (0/84) simi=0.00% (0/84)<br/> qkivvhlratggapilkqskfkvsdskfanvidflrrqlhsdslfvynsafspndesvidlynnfgdglvnyacsmaw-----<br/> -----msggtaattagskvtfkitlisdplkpfkvlsvpesptftavlkafaeefkvpaaTSAIITndgvgvnpaqpagniflkhgselrliipdrvgh</p> <p><b>Proposed:</b> aliSize=75 (resi) RMSD=2.31 (Å)<br/> -----OKIVHLRATGGAPILKQSKFKVSGSDKFNVIDFLRRQLHSD--SLFVYV--NSAFSPNPDESVIDLYNNFGFDGKLVVNYACS---Maw<br/> msggtaattagSKVTFKITLISDPKLP-FKVLSPPESTPTAVLKAFAEEFKVPaaTSAIITndgvgvnpaqpagniflkhgSELRLIPdrvgh---</p>                                                                                                         |
|    | 117yA<br>(94) |   |       |                                                                                                                                                                                                                                                                                                                                                                                                                                                                                                                                                                                                                                                                                                                                                                                                                                                                                                                                                                                                                                                                                                                                                                                                 |

|    |                                                    |   |      |                                                                                                                                                                                                                                                                                                                                                                                                                                                                                                                                                                                                                                                                                                                                                                                                                                                                                                                                                                                                                                                                                                                                                                                                                                |
|----|----------------------------------------------------|---|------|--------------------------------------------------------------------------------------------------------------------------------------------------------------------------------------------------------------------------------------------------------------------------------------------------------------------------------------------------------------------------------------------------------------------------------------------------------------------------------------------------------------------------------------------------------------------------------------------------------------------------------------------------------------------------------------------------------------------------------------------------------------------------------------------------------------------------------------------------------------------------------------------------------------------------------------------------------------------------------------------------------------------------------------------------------------------------------------------------------------------------------------------------------------------------------------------------------------------------------|
| 42 | <p>1wz3A<br/>(84)</p> <hr/> <p>1lm8B<br/>(106)</p> | C | 5.95 | <p><b>TM-align:</b> aliSize=48 (resi) RMSD=2.59 (Å)<br/>       QKIVVHLRATgGapILkqSKFKVSGSDKFANVIDFLRRQLHSD--SLFVYVNSAfsnpndesvidlynnfgf-----Dgklvnyacsmaw-----<br/>       MDVFLMIRRH-K--TT--IFTDAKESSTVFELKRIVEGITKRPpDEQRLYKDDQ-----l1ddgkltlgecgftsqtarpqapatvglafrradtfealciE-----pfsppelpdvmkpq</p> <p><b>SARST:</b> aliSize=72 (resi) RMSD=13.27 (Å)<br/>       qki-VVHLRATGGAPILkqsKFKVSGSDKFANVIDFLRRQLHS--DSLFFVYVNSAFSPNPDESVIDL---YNNFGFDGKLVVNYA-----csmaw<br/>       ---mDVFMIIRRHKTTI---FTDAKESSTVFELKRIVEGITKRPpDEQRLYKDDQDQLLDGKtLgecgftsqtarpqapatvglafrradtfealci epfsppelpdvmkpq----</p> <p><b>BLAST:</b> aliSize=8 (resi) iden=7.14% (6/84) simi=9.52% (8/84)<br/>       qkivvhlratggapilkqskfkvsgsdkfavidflrrqlhsdsvnsafspn-----PDESVIDLYNNFGFDGK-----lvnyacsmaw<br/>       -----mdvflmirrhkttiftdakesstvfelkrivegilkrpDEQRLYKDDQLLDGKtLgecgftsqtarpqapatvglafrradtfealci epfsppelpdvmkpq-----</p> <p><b>Proposed:</b> aliSize=75 (resi) RMSD=2.33 (Å)<br/>       QKIVVHLRAT-ggapILkqSKFKVSGSDKFANVIDFLRRQLHSD-SLFVYV-nSAFSPNPDESVIDL-YN--nfGFDG--KLVVNYA-C-----SMAW-----<br/>       MDVFLMIRRHk----TT--IFTDAKESSTVFELKRIVEGITKRPpDEQRLYk-DDQLLDGKTLGECgFTsq--TARPaPATVGLAFrradtfeALCi epfsppelpdvmkpq</p> |
| 43 | <p>1wz3A<br/>(84)</p> <hr/> <p>2io1B<br/>(81)</p>  | C | 6.17 | <p><b>TM-align:</b> aliSize=48 (resi) RMSD=2.29 (Å)<br/>       QKIVVHLRATgGAPILkqSKFKVSGSDKFANVIDFLRRQLHSD-S-LFVYVNSAfsnpndesvidlynnfgfdgklvnyacsmaw-----<br/>       DHINLKVAGQ-D-GSV--VQFKIKRHTPLSKLMKAYCERQGLSmRqIRFRFDGQ-----pinetdtpaqlemedetidvqqqggvpe</p> <p><b>SARST:</b> aliSize=69 (resi) RMSD=12.83 (Å)<br/>       q-KIVVHLRATGgAPILkQSKFKVSGSDKFANVIDFLRRQLHS---DSLFFVYVNSAFSPNPDESVIDLYNNFGFDGKLVVNYA-----csmaw<br/>       -dHINLKVAGQDLS---VQFKIKRHTPLSKLMKAYCERQGLsmrQIRFRFDGQPIN--ETDT---PAQLEMEDEDTIDVFQqqtggvpe----</p> <p><b>BLAST:</b> aliSize=6 (resi) iden=4.94% (4/81) simi=7.41% (6/81)<br/>       qkivvhlratggapilkqskfkvsgsdkfavidflrrqlhsdsvnsafspn-----DESVIDLY-----nnfgfdgklvnyacsmaw<br/>       -----dhinlkvagqdgsvvqfkikrhtplsklmkaycerqglsmrqirfrfdgqpinetdtpaqlemedetidvqqqggvpe-----</p> <p><b>Proposed:</b> aliSize=73 (resi) RMSD=2.03 (Å)<br/>       QKIVVHLRATgGAPILkqSKFKVSGSDKFANVIDFLRRQLHSD--SLFVYVNSAFSPNPDESVIDLYnnFGfdGKLVVNYACSM-----aw<br/>       DHINLKVAGQ--DGSV--VQFKIKRHTPLSKLMKAYCERQGLSmrQIRFRFDGQPINETDTPAQI--EME--DEDTIDVFQqqtggvpe--</p>                                                                                                                               |
| 44 | <p>1wz3A<br/>(84)</p> <hr/> <p>2dziA<br/>(81)</p>  | C | 6.17 | <p><b>TM-align:</b> aliSize=48 (resi) RMSD=2.55 (Å)<br/>       q-----KIVVHLRATGGAPILkqSKFKVSGSDKFANVIDFLRRQLHSD--SLFVYVNSAfsnpndesvidlynnfgfdgklvnyacsmaw-----<br/>       -gssgsSGMQLTVKALQGREC--SLQ-VPEDELVSTLKQLVSEKLNVPvRQRLLFKFKG-----aladgkrlsdysigpnsklnlvvpkl</p> <p><b>SARST:</b> aliSize=69 (resi) RMSD=12.76 (Å)<br/>       qk-----IVVHLRATGgAPILkqskFKVSGSDKFANVIDFLRRQLHS--DSLFFVYVNSAFSPNPDESVIDLYNNFGFDGKLVVNYA-----csmaw<br/>       --gssgsgMQLTVKALQGRECS---LQVPEDELVSTLKQLVSEKLNVPvRQRLLFK-GKALADGKR---SDYSIGPNSKLNLVVkpI-----</p> <p><b>BLAST:</b> aliSize=0 (resi) iden=0.00% (0/81) simi=0.00% (0/81)<br/>       qkivvhlratggapilkqskfkvsgsdkfavidflrrqlhsdsvnsafspn-----gssgsgmqltvkalqgreclsqpedelvstlkqlvseklnvpvrqrrllfkGkaladgkrlsdysigpnsklnlvvpkl</p> <p><b>Proposed:</b> aliSize=72 (resi) RMSD=2.24 (Å)<br/>       -----QKIVVHLRATgGAPILkqSKFKVSGSDKFANVIDFLRR-QLHS--DSLFFVYVNSAFSPNPDESVIDLYnnFGfdGKLVVNYACS--maw<br/>       gssgsSGMQLTVKAL-QG-RE--CSLQVPEDELVSTLKQLVSEKLNVPvRQRLLFK-GKALADGKRLSDY--SIC--PNSKLNLVVkpI----</p>                                                                                                                                                                   |

|    |                                                    |   |      |                                                                                                                                                                                                                                                                                                                                                                                                                                                                                                                                                                                                                                                                                                                                                                                                                                                                                                                                                                                                                                                                                                                                                                     |
|----|----------------------------------------------------|---|------|---------------------------------------------------------------------------------------------------------------------------------------------------------------------------------------------------------------------------------------------------------------------------------------------------------------------------------------------------------------------------------------------------------------------------------------------------------------------------------------------------------------------------------------------------------------------------------------------------------------------------------------------------------------------------------------------------------------------------------------------------------------------------------------------------------------------------------------------------------------------------------------------------------------------------------------------------------------------------------------------------------------------------------------------------------------------------------------------------------------------------------------------------------------------|
| 45 | <p>1wz3A<br/>(84)</p> <hr/> <p>1wjuA<br/>(100)</p> | C | 1.19 | <p><b>TM-align:</b> aliSize=51 (resi) RMSD=2.73 (Å)<br/> -----QKIVVHLRATgGAPILK-QSKFKVSGSDKFANVIDFLRR--QHSDFVYVNSAFspnpdesvidlynnfgfdgklvnyacsmaw-----<br/> gssgsgsdnyrttGIATIEVFLP-PRLKKDrKNLETRLHITGRELRSKIAEtFGQENYIKIIVINKK-----qlqlgktleegvahnvkamvlelkqssgpgsg</p> <p><b>SARST:</b> aliSize=71 (resi) RMSD=12.92 (Å)<br/> qk-----IVVHLRAT---GGAPILkqsKFKVSGSDKFANVIDFLRRQLHS-DSLFVYVNSAFSPNPDESVIDLynnFGFDGKLVVNYA-----csmaw<br/> --gssgsgsdnyrttgiATIEVFLPPrIKKDRKN---LLETRLHITGRELRSKIAETFGLeNYIKIIVINKKQQLGKTLEEQ---GVAHNVKAMVLElkqssgpgsg----</p> <p><b>BLAST:</b> aliSize=6 (resi) iden=7.14% (6/84) simi=7.14% (6/84)<br/> qkivvhlratggapi-----LKSQKFKVSGsdkfavidflrrqlhsdslfvvyvnsafspnpdesvidlynnfgfdgklvnyacsmaw<br/> -----gssgsgsdnyrttgiatievflpprkkdrknlletrlhitgrelrskiaetfglqenyikiviinkkqlqlgktleegvahnvkamvleLKQSSGPSG-----</p> <p><b>Proposed:</b> aliSize=73 (resi) RMSD=2.20 (Å)<br/> -----QKIVVHLRATgGAPILK--qSKFKVSGSDKFANVIDFLRR-QLHS-DSLFVYVNSAFSPNPDESVIDLynnFGfdGKLVVNYAC-----smaw<br/> gssgsgsdnyrttGIATIEVFLP-PRLKKDrK-NLETRLHITGRELRSKIAEtFGLQeNYIKIIVIN-KKQQLGKTLEEQ--GVA--HNVKAMVLElkqssgpgsg----</p>                           |
| 46 | <p>1wz3A<br/>(84)</p> <hr/> <p>1wx7A<br/>(106)</p> | C | 9.52 | <p><b>TM-align:</b> aliSize=48 (resi) RMSD=2.47 (Å)<br/> -----QKIVVHLRATggApILkqSKFKVSGSDKFANVIDFLRRQLHSD-SLFVYVNSAFspnpdesvidlynnfgfdgklvnyacsmaw-----<br/> gssgsgspapvqdpHLIKVTKTP--K-DK--EDFSYTDCTIQOLKEEISQRFKAHPDQLLIFAGK-----ilkdpds laqcgvr dgl tvhlvikr qhramgnecpasgpgsg</p> <p><b>SARST:</b> aliSize=74 (resi) RMSD=14.64 (Å)<br/> qk-----IVVHLRATGGAPILkqskFKVSGSDKFANVIDFLRRQLHS-DSLFVYVNSAFSPNPDESVIDLynnNFGFDGKLVVNYACSM-----w<br/> --gssgsgspapvqdpHLIKVTKTPKDKED---SFTDTCTIQOLKEEISQRFKAHPDQLLIFAGKILKDPDSLAAQ---CGVRDGLTIVHLVIKROHramgnecpasgpgsg-</p> <p><b>BLAST:</b> aliSize=9 (resi) iden=4.76% (4/84) simi=10.71% (9/84)<br/> qkivvhlratggapi lkqskfkvsgsdkfavidflrrqlhsdslfvvyvnsafspnpdesvidlynnfgfdgklvnyacsmaw<br/> -----gssgsgspapvqdpHLIKVTKTPKDKEDfsvtdtctiqllkeeISQRFKAHPDQLLIFAGKILKDPDSLAAQ---GVR--DGLTIVHLVIKROHramgnecpasgpgsg-----</p> <p><b>Proposed:</b> aliSize=71 (resi) RMSD=2.15 (Å)<br/> -----QKIVVHLRATggApILkqSKFKVSGSDKFANVIDFLRRQLHSD-SLFVYVNSAFSPNPDESVIDLynnNFGfdGKLVVNYA-C-----smaw<br/> gssgsgspapvqdpHLIKVTKTP--K-DK--EDFSYTDCTIQOLKEEISQRFKAHPDQLLIFAGKILKDPDSLAAQ---GVR--DGLTIVHLVIKROHramgnecpasgpgsg----</p> |
| 47 | <p>1wz3A<br/>(84)</p> <hr/> <p>1se9A<br/>(101)</p> | C | 4.76 | <p><b>TM-align:</b> aliSize=49 (resi) RMSD=2.65 (Å)<br/> -----QKIVVHLRATgGAPILkqSKFKVSGSDKFANVIDFLRRQL-H-----SD--SLFVYVNSAFspnpdesvidlynnfgfdgklvnyacsmaw-----<br/> eaevhnQLEIKFRLLDSDIG--GPKAFPDATTVSALKETVISEWpRekengpKTVkEVKLISAGK-----vlensktvkdyrspvsnlagavtmhvi iqapvtekek</p> <p><b>SARST:</b> aliSize=71 (resi) RMSD=12.30 (Å)<br/> qk-----IVVHLRATGGAPILkqskFKVSGSDKFANVIDFLRRQL-----HSDSL--FVYVNSAFSPNPDESVIDLynnNFGFDGKLVVNYA-----csmaw<br/> --eaevhnQLEIKFRLLDSDIG--GPKAFPDATTVSALKETVISEWpRekengpKTVkEVKLISAGKVLNSKT---VKDYRSPVSNLAGAVTtmhvi iqapvtekek----</p> <p><b>BLAST:</b> aliSize=0 (resi) iden=0.00% (0/84) simi=0.00% (0/84)<br/> qkivvhlratggapi lkqskfkvsgsdkfavidflrrqlhsdslfvvyvnsafspnpdesvidlynnfgfdgklvnyacsmaw-----<br/> -----eaevhnqleikfrlldgsdigpkafpdattvsalketvisewprekengpKTVkEVKLISAGKVLNSKT---VKDYRSPVSNLAGAVTtmhvi iqapvtekek</p> <p><b>Proposed:</b> aliSize=70 (resi) RMSD=1.93 (Å)<br/> q-----KIVVHLRATgGAPILkqSKFKVSGSDKFANVIDFLRRQL-H-----SD--SLFVYVNSAFSPNPDESVIDLynnNFGfdGKLVVNYACS-----maw<br/> --eaevhnQLEIKFRLLDSDIG--GPKAFPDATTVSALKETVISEWpRekengpKTVkEVKLISAGKVLNSKT---VKDYRSPVSNLAGAVTtmhvi iqapvtekek---</p>  |



|    |               |   |       |                                                                                                                                                                                                                                                                                                                                                                                                                                                                                                                                                                                                                                                                                                                                                                                                                                                                                                                                                                                                                                                                                                                                                                                                                                              |
|----|---------------|---|-------|----------------------------------------------------------------------------------------------------------------------------------------------------------------------------------------------------------------------------------------------------------------------------------------------------------------------------------------------------------------------------------------------------------------------------------------------------------------------------------------------------------------------------------------------------------------------------------------------------------------------------------------------------------------------------------------------------------------------------------------------------------------------------------------------------------------------------------------------------------------------------------------------------------------------------------------------------------------------------------------------------------------------------------------------------------------------------------------------------------------------------------------------------------------------------------------------------------------------------------------------|
| 48 | 1wz3A<br>(84) | C | 9.52  | <p><b>TM-align:</b> aliSize=47 (resi) RMSD=1.96 (Å)<br/> -----QKIVVHLRATggAPILkqSKFKVSGSDKFANVIDFLRROLHS-DSLFVYV-NSAFspnpdesvidlynnfgdgklvnyacsmaw-----<br/> gssgssgtatnhqglpavdseilempekadgvvegidvngpKAQLMLRY---PDgKR--EQITLPEQAKLLALVKHVQSKGYPhERFELLTnFPR-----rk1shldyditlqeaglcqpetvfvqesgpsg</p> <p><b>SARST:</b> aliSize=48 (resi) RMSD=3.67 (Å)<br/> q-----IVVHLRATGAPILkqskFKVSGSDKFANVIDFLRROLHS-DSLFVYVNSAFspN-----pdesvidlynnfgdgklvnyacsmaw<br/> -gssgssgtatnhqglpavdseilempekadgvvegidvngpKAQLMLRYPDKREQ---ITLPEQAKLLALVKHVQSKGYPhERFELLTnFP---Rrk1shldyditlqeaglcqpetvfvqesgpsg-----</p> <p><b>BLAST:</b> aliSize=15 (resi) iden=8.33% (7/84) simi=17.86% (15/84)<br/> qkivvhlratggapilkqskfkvsgsdkfانvidflrrqlhs-----DSLFVYVnsAFSPNPDESVIDLYNNFDFGKLVVNY-----acsmaw<br/> -----gssgssgtatnhqglpavdSEIL---EMPPEKADGVVEGIDVNPKAQLMLRtpdgkreqitlpeqakllalvkhvqskgypnerfelltnfprrk1shldyditlqeaglcqpetvfvqesgpsg-----</p> <p><b>Proposed:</b> aliSize=74 (resi) RMSD=2.41 (Å)<br/> -----QKIVVHLRATggAPILkqSKFKVSGSDKFANVIDFLRROLHS-DSLFVYV-NSAF-S-PNPDESVIDLynNFGfdGKLVVNYACSM-----aw<br/> gssgssgtatnhqglpavdseilempekadgvvegidvngpKAQLMLRY---PDGKR--EQITLPEQAKLLALVKHVQSKGYPhERFELLTnFPRRK1ShLDYITLQEA--GLC--POETVFOESGpsg--</p> |
| 49 | 1wz3A<br>(84) | C | 5.95  | <p><b>TM-align:</b> aliSize=48 (resi) RMSD=2.65 (Å)<br/> -----Q-KIVVHLRATgGapILkqSKFKVSGSDKFANVIDFLRROLHSD-SLFVYVNSAFspnpdesvidlynnfgdgklvnyacsmaw-----<br/> sglvprgsPhLkVTVKTP-K--DK--EDFSVTDICTIQOLKEEISORFKAHPDQLVLIIFAGK-----ilkdpds laqcgvrldgtvhlvikrqhram</p> <p><b>SARST:</b> aliSize=70 (resi) RMSD=12.46 (Å)<br/> qk-----IVVHLRATGGAPILkqskFKVSGSDKFANVIDFLRROLHSD-DSLFVYVNSAFSPNPDESVIDLYNNFGFDGKLVVNYA-----csmaw<br/> --sglvprgsphLIKVTVKTPKDKED---SFSVTDICTIQOLKEEISORFKAHPDQLVLIIFAGKILKDPDS---LAQCGVRDLTHLVIKrqhram-----</p> <p><b>BLAST:</b> aliSize=9 (resi) iden=4.76% (4/84) simi=10.71% (9/84)<br/> qkivvhlratggapilkqskfkvsgsdkfانvidflrrqlhsdslfvy-----NSAFSPNPDESVIDLYNNFGFDGKLVVNYACSM-----dlynnfgdgklvnyacsmaw<br/> -----sglvprgsphlikvtvktpkdkedfsvtdictiqolkeelSQRFKAHDPDQLVLIifagiilkdpds laqcgvrldgtvhlvikrqhram-----</p> <p><b>Proposed:</b> aliSize=72 (resi) RMSD=2.34 (Å)<br/> -----QKIVVHLRATGGAPILkqSKFKVSGSDKFANVIDFLRROLHSD-SLFVYVNSAFSPNPDESVIDLynNFGfdGKLVVNYACSM-----maw<br/> sglvprgsPhLIKVTVKTPK-DKE--DFSVT-DICTIQOLKEEISORFKAHPDQLVLIIFAGKILKDPDSLAAQC--GVR--DGLTHLVIKrqhram---</p>                                                                                                               |
| 50 | 1wz3A<br>(84) | C | 10.13 | <p><b>TM-align:</b> aliSize=48 (resi) RMSD=2.40 (Å)<br/> --QKIVVHLRATggaPILkqSKFKVSGSDKFANVIDFLRROLHSD--SLFVYVNSAFspnpdesvidlynnfgdgklvnyacsmaw-----W-----<br/> peTHINLKVSDG---SSE--IFFKIKKTTPLRRLMEAFKRQKEmdSLRFLYDGI-----riqadqtpedldmEdndieahreqigg</p> <p><b>SARST:</b> aliSize=68 (resi) RMSD=12.31 (Å)<br/> qkiv---VHLRATGAPILkqskFKVSGSDKFANVIDFLRROLHSD-DSLFVYVNSAFSPNPDESVIDLYNNFGFDGKLVVNYA-----acsmaw<br/> ----pethINLKVSDG---SSE--IFFKIKKTTPLRRLMEAFKRQKEmdSLRFLYDGIIRIQADQTPEDL---LDME--DNDIEAHreqigg-----</p> <p><b>BLAST:</b> aliSize=30 (resi) iden=18.99% (15/79) simi=37.97% (30/79)<br/> qkiv---VHLRATGapiLKQSKFKVSGSDKFANVIDFLRROLHSDSLFVYVnsAFSPNPDESVIDLYNNFGFDGKLVVNYACSM-----yynnfgdgklvnyacsmaw<br/> ----pethINLKVSDG---SSE--IFFKIKKTTPLRRLMEAFKRQKEmdSLRFLYDGIIRIQADQTPEDLdmedndieahreqigg-----</p> <p><b>Proposed:</b> aliSize=72 (resi) RMSD=1.94 (Å)<br/> --QKIVVHLRATggaPILkqSKFKVSGSDKFANVIDFLRROLHSD--SLFVYVNSAFSPNPDESVIDLYNNFGfdGKLVVNYACSM-----aw<br/> peTHINLKVSDG---SSE--IFFKIKKTTPLRRLMEAFKRQKEmdSLRFLYDGIIRIQADQTPEDL---DME--DNDIEAHREQigg--</p>                                                                                                                                                      |
|    | leuvB<br>(79) |   |       |                                                                                                                                                                                                                                                                                                                                                                                                                                                                                                                                                                                                                                                                                                                                                                                                                                                                                                                                                                                                                                                                                                                                                                                                                                              |

|    |               |   |       |                                                                                                                                                                                                                                                                                                                                                                                                                                                                                                                                                                                                                                                                                                                                                                                                                                                                                                                                                                                                                                                                                                  |
|----|---------------|---|-------|--------------------------------------------------------------------------------------------------------------------------------------------------------------------------------------------------------------------------------------------------------------------------------------------------------------------------------------------------------------------------------------------------------------------------------------------------------------------------------------------------------------------------------------------------------------------------------------------------------------------------------------------------------------------------------------------------------------------------------------------------------------------------------------------------------------------------------------------------------------------------------------------------------------------------------------------------------------------------------------------------------------------------------------------------------------------------------------------------|
| 51 | 1wz3A<br>(84) | C | 3.57  | <p><b>TM-align:</b> aliSize=48 (resi) RMSD=2.48 (Å)<br/> -----QKIVVHLRATgGApILkqSKFKVSGSDKfANVIDFLRRQLHSD--SLFVYVNSAfsnpndesvidlynnfgfdgklvnyacsmaw-----<br/> gssgsSGIQVFKVKNP-DG-GS--YAYAINPNSFILGLKQOIEDQGLPKKQQQLEFCG-----qvlqdwlggiygiqdsdtlilskkkgsgpssg</p> <p><b>SARST:</b> aliSize=69 (resi) RMSD=12.16 (Å)<br/> q-----KIVVHLRATGGAPILkqsKFKVSGSDKfANVIDFLRRQLHS--DSLFVYVNSAFSPNPDESVIDlyNNFGFDG--KLVVN-----yacsma<br/> -gssgsSGIQVFKVKNPDGGSY--AYAINPNSFILGLKQOIEDQGLPKKQQQLEFCG-QVLDWLGLG---IYGIQSDTLILSKkkgsgpssg-----</p> <p><b>BLAST:</b> aliSize=7 (resi) iden=4.76% (4/84) simi=8.33% (7/84)<br/> qkivvhlratggapilkqskfkvsgsdkfavidflrrqlh-----SDSLFVYVNSAFSPN--pdesvidlynnfgfdgklvnyacsmaw<br/> -----gssgsgsiqvfknpdggsyayainpnsfilglkqiiedqgglpkqqlefqgqvlqdwlggiygiqdsdtlilskkkgsgpssg-----</p> <p><b>Proposed:</b> aliSize=72 (resi) RMSD=2.31 (Å)<br/> -----QKIVVHLRATggAPILkqSKFKVSGSDKfANVIDFLRRQLHSD--SLFVYVNSAFSPNPDESVIDLynNFGfdGKLVVNYAC-S-----maw<br/> gssgsSGIQVFKVKNP--DGGs--YAYAINPNSFILGLKQOIEDQGLPKKQQQLEFCG-QVLDWLGLGIY--GIQ--DSDTLILSKkkgsgpssg---</p>         |
| 52 | 1wz3A<br>(84) | C | 10.96 | <p><b>TM-align:</b> aliSize=47 (resi) RMSD=2.64 (Å)<br/> qKiVVHLRATGGAPILkqSKFKVSGSDKfANVIDFLRRQLHSD--SLFVYVNSAfsnpndesvidlynnfgfdgklvnyacsmaw-----<br/> -M-IEVVNDRLGKKV--RVK-CLAEISVGDfKkVLSLIGTQpnKIVLQKGS-----vldkhisledyevhdqtnlelyyl</p> <p><b>SARST:</b> aliSize=57 (resi) RMSD=13.89 (Å)<br/> qkivvhlratggapilkqs-----KFKVSGSDKfANVIDFLRRQLHSDSLFVYVNSAFSPNPDESVIDLynNFGFDGKLVVNYAC-csmaw<br/> -----mi evvndrlgkkvrvkclaeisvgdffkvlsligtqpnkivlqkgsvlkdhisledyevhdqtnlelyyl-----</p> <p><b>BLAST:</b> aliSize=0 (resi) iden=0.00% (0/73) simi=0.00% (0/73)<br/> qkivvhlratggapilkqskfkvsgsdkfavidflrrqlhsdlsfvyvnsaafspndesvidlynnfgfdgklvnyacsmaw-----<br/> -----mi evvndrlgkkvrvkclaeisvgdffkvlsligtqpnkivlqkgsvlkdhisledyevhdqtnlelyyl-----</p> <p><b>Proposed:</b> aliSize=70 (resi) RMSD=2.41 (Å)<br/> qKIVVHLRATGgAPILkqSKFKVSGSDKfANVIDFLRRQLHSD--SLFVYVNSAFSPNPDESVIDLynNFGfdGKLVVNYAC-smaw<br/> -M-IEVVNDRLG--KKV--RVK-CLAEISVGDfKkVLSLIGTQpnKIVLQKGS-SVLKDHISLEIY--EVH--DOTNLELYYI-----</p>                                                                                     |
| 53 | 1wz3A<br>(84) | C | 11.90 | <p><b>TM-align:</b> aliSize=47 (resi) RMSD=2.74 (Å)<br/> -----QKIVVHLR-ATgGap--IILKQSKFKVSGSDKfANVIDFLRRQLHSD--SLFVYVNSAfsnpndesvidlynnfgfdgklvnyacsmaw-----<br/> gplgsmSKVSKFITLTS-D--prL-PYKVLSPPEPTPTAVLKFAAEEFKVPAATSAIITndGI-----ginpaqtagnvflkhgselriipdrvg</p> <p><b>SARST:</b> aliSize=70 (resi) RMSD=11.95 (Å)<br/> q-----KIVVHLRATGGA---IILkqsKFKVSGSDKfANVIDFLRRQLHSDSLFVYVNS--AFSPNPDESVIDLYNNFGfdGKLVV-----nyacsma<br/> -gplgsmSKVSKFITLTSdprL-PYK--VLSVPEPTPTAVLKFAAEEFKVPAATSAIITndGIGINFAQTAGNVFLKH--GSEIRIipdrvg-----</p> <p><b>BLAST:</b> aliSize=0 (resi) iden=0.00% (0/84) simi=0.00% (0/84)<br/> qkivvhlratggapilkqskfkvsgsdkfavidflrrqlhsdlsfvyvnsaafspndesvidlynnfgfdgklvnyacsmaw-----<br/> -----gplgsmkvsfkilttsdprlpykvlsvpestpftavlkfaaefkvpaaatsaiitndgiginfaqtagnvflkhgselriipdrvg-----</p> <p><b>Proposed:</b> aliSize=72 (resi) RMSD=2.30 (Å)<br/> -----QKIVVHLRATggaPI---IILKQSKFKVSGSDKfANVIDFLRRQLHSD--SLFVYVNSAFSPNPDESVIDLYNNFGfdgKLVVNYACS----maw<br/> gplgsmSKVSKFITL----TSdprL-PYKVLSPPEPTPTAVLKFAAEEFKVPAATSAIITndGIGINFAQTAGNVFLKH-----SELRIPDRvg---</p> |
|    | 1wx3A<br>(88) |   |       |                                                                                                                                                                                                                                                                                                                                                                                                                                                                                                                                                                                                                                                                                                                                                                                                                                                                                                                                                                                                                                                                                                  |

|    |                |   |      |                                                                                                                                                                                                                                                                                                                                                                                                                                                                                                                                                                                                                                                                                                                                                                                                                                                                                                                                                                                                                                                                                                                                                                                                        |
|----|----------------|---|------|--------------------------------------------------------------------------------------------------------------------------------------------------------------------------------------------------------------------------------------------------------------------------------------------------------------------------------------------------------------------------------------------------------------------------------------------------------------------------------------------------------------------------------------------------------------------------------------------------------------------------------------------------------------------------------------------------------------------------------------------------------------------------------------------------------------------------------------------------------------------------------------------------------------------------------------------------------------------------------------------------------------------------------------------------------------------------------------------------------------------------------------------------------------------------------------------------------|
| 54 | 1wz3A<br>(84)  | C | 9.88 | <p><b>TM-align:</b> aliSize=47 (resi) RMSD=2.98 (Å)<br/> qKiVVHLRATG-----Ap-ILkqSKFKVSGSDKFANVIDFLRRQLHSD--SLFVYVNSAfsnpndesvidlynnfgfdgklvnyacsmaw-----<br/> -M-QIFVKLTlTgggggG-gKT--ITLEVEPSDTIENVKAKIQDKEGIPpdQQRILFAGK-----qledgrtIsdyniqkestlhlvlrl</p> <p><b>SARST:</b> aliSize=42 (resi) RMSD=7.20 (Å)<br/> qkivvhlrat-----GGAPILkqsKFKVSGSDKFANVIDFLRRQLHSD--SLFVYVNSAfsnpndesvidlynnfgfdgklvnyacsmaw-----<br/> -----mqifvktltgggggGGGKTI--TLEVEPSDTIENVKAKIQDKEGIPpdQQRILFAGK-----AGQLEdgrtIsdyniqkestlhlvlrl-----</p> <p><b>BLAST:</b> aliSize=9 (resi) iden=9.88% (8/81) simi=11.11% (9/81)<br/> qkivvhlrat-----GGAPILKQSKFKVSGSDKFANVIDFLRRQLHSD--SLFVYVNSAfsnpndesvidlynnfgfdgklvnyacsmaw-----<br/> -----mqifvktltggggGGGGGTTITLEVEPSDTIENVKAKIQDKEGIPpdqqrliFAGKqledgrtIsdyniqkestlhlvlrl-----</p> <p><b>Proposed:</b> aliSize=69 (resi) RMSD=2.34 (Å)<br/> qKiVVHLRATG-----apILkqSKFKVSGSDKFANVIDFLRRQLHSD--SLFVYVNSAFSPNPDESVIDLynNFGfdGKLVVNYAC--smaw<br/> -M-QIFVKLTlTggggggg--KT--ITLEVEPSDTIENVKAKIQDKEGIPpdQQRILFAGKQLEDGRTLSY--NIQ--KESTLHLVLRl----</p>                                                                                                                          |
| 55 | 1wz3A<br>(84)  | C | 5.95 | <p><b>TM-align:</b> aliSize=50 (resi) RMSD=2.85 (Å)<br/> -----Q-KIVVHLRATGGA-PILkqSKFKVSGSDKFANVIDFLRRQLHSD--SLFVYVNSAfsnpndesvidlynnfgfdgklvnyacsmaw-----<br/> gssgsgkfdesalvpedqflaqhPgPATIRVSKPNEndGQF--MEITVqSLSENVGSLKEKIAGEIQIPankQKLSGKAG-----fIkdnmSlahynvgageiltlslrersgpgsg</p> <p><b>SARST:</b> aliSize=68 (resi) RMSD=13.34 (Å)<br/> q-----KIVVHLRATGG-----APILKQSKfkvsGSDKFANVIDFLRRQLHSD--SLFVYVNSAFSPNPDESVIDLynNFGFDKLVVNYA-----csmaw<br/> -gssgsgkfdesalvpedqflaqhPgPATIRVSKPNEndqfmEITVQSL-----SENVGSLKEKIAGEIQIPankQKLSGK-AGFLKDNMSLAH--YNVGAEILTLslrersgpgsg-----</p> <p><b>BLAST:</b> aliSize=7 (resi) iden=7.14% (6/84) simi=8.33% (7/84)<br/> qkivvhlrat-----GGAPILKQSKFKVSGSDKFANVIDFLRRQLHSD--SLFVYVNSAfsnpndesvidlynnfgfdgklvnyacsmaw-----<br/> -----gssgsgkfdesalvpedqflaqhpgpatirvskpnendqfmEITVqslsenvgslkekiageiqipankqklsGAGfIkdnmSlahynvGAEILTLslrersgpgsg-----</p> <p><b>Proposed:</b> aliSize=71 (resi) RMSD=2.09 (Å)<br/> -----Q-KIVVHLRATGG---apILkqSKFKVSGSDKFANVIDFLRRQLHSD--SLFVYVNSAFSPNPDESVIDLynNFGfdGKLVVNYAC--S-----maw<br/> gssgsgkfdesalvpedqflaqhPgPATIRVSKPNEndg--QF--MEITVqSLSENVGSLKEKIAGEIQIPankQKLSGKA-GFLKDNMSLAHY--Vg--AGEILTLslrersgpgsg---</p> |
| 56 | 1wz3A<br>(84)  | C | 9.52 | <p><b>TM-align:</b> aliSize=48 (resi) RMSD=2.46 (Å)<br/> -----QKIVVHLRATggAPILkqSKFKVSGSDKFANVIDFLRRQLHSD--SLFVYVNSAfsnpndesvidlynnfgfdgklvnyacsmaw-----<br/> gpgyidtnndgwiegedelyidtnndgwiegedellAMQIFVKLT--TGKT--ITLEVEPSDTIENVKAKIQDKEGIPpdQQRILFAGK-----qledgrtIsdyniqkestlhlvlrlrg</p> <p><b>SARST:</b> aliSize=50 (resi) RMSD=8.66 (Å)<br/> qk-----IVVHLRATGGAPILkqsKFKVSGSDKFANVIDFLRRQLHSD--SLFVYVNSAFSP-----npdesvidlynnfgfdgklvnyacsmaw<br/> --gpgyidtnndgwiegedelyidtnndgwiegedellAMQIFVKLTGKTI--TLEVEPSDTIENVKAKIQDKEGIPpdqqrliFAGKqledgrtIsdyniqkestlhlvlrlrg-----</p> <p><b>BLAST:</b> aliSize=7 (resi) iden=7.14% (6/84) simi=8.33% (7/84)<br/> qkivvhlratggapil-----KQSKFKVSGSDKFANVIDFLRRQLHSD--SLFVYVNSAFSPNPDESVIDLynNFGfdGKLVVNYAC--maw<br/> -----gpgyidtnndgwiegedelyidtnndgwiegedellamqifvktltgTTITLEVEPSDTIENVKAKIQDKEGIPpdqqrliFAGKqledgrtIsdyniqkestlhlvlrlrg-----</p> <p><b>Proposed:</b> aliSize=72 (resi) RMSD=2.31 (Å)<br/> -----QKIVVHLRATggAPILkqSKFKVSGSDKFANVIDFLRRQLHSD--SLFVYVNSAFSPNPDESVIDLynNFGfdGKLVVNYAC--maw<br/> gpgyidtnndgwiegedelyidtnndgwiegedellAMQIFVKLT--TGKT--ITLEVEPSDTIENVKAKIQDKEGIPpdQQRILFAGKQLEDGRTLSY--NIQ--KESTLHLVLRlrg---</p>              |
|    | 2objA<br>(81)  |   |      |                                                                                                                                                                                                                                                                                                                                                                                                                                                                                                                                                                                                                                                                                                                                                                                                                                                                                                                                                                                                                                                                                                                                                                                                        |
|    | 1we6A<br>(111) |   |      |                                                                                                                                                                                                                                                                                                                                                                                                                                                                                                                                                                                                                                                                                                                                                                                                                                                                                                                                                                                                                                                                                                                                                                                                        |
|    | 2ojrA<br>(110) |   |      |                                                                                                                                                                                                                                                                                                                                                                                                                                                                                                                                                                                                                                                                                                                                                                                                                                                                                                                                                                                                                                                                                                                                                                                                        |

|    |               |   |      |                                                                                                                                                                                                                                                                                                                                                                                                                                                                                                                                                                                                                                                                                                                                                                                                                                                                                                                                                                                                                                                                                                                             |
|----|---------------|---|------|-----------------------------------------------------------------------------------------------------------------------------------------------------------------------------------------------------------------------------------------------------------------------------------------------------------------------------------------------------------------------------------------------------------------------------------------------------------------------------------------------------------------------------------------------------------------------------------------------------------------------------------------------------------------------------------------------------------------------------------------------------------------------------------------------------------------------------------------------------------------------------------------------------------------------------------------------------------------------------------------------------------------------------------------------------------------------------------------------------------------------------|
| 57 | 1wz3A<br>(84) | C | 8.33 | <p><b>TM-align:</b> aliSize=49 (resi) RMSD=2.03 (Å)<br/> --QKIVVHLRATggPILKqSKFKVSGSDKFNVIDFLRRQLHSD--SLFVYV-----NSAFspnpdesvidlynnfgfdgklvnyacsmaw-----<br/> mtEVDLEITIN--TDFP-MEKKYPAGMSLNDLKKKLELVVGTtvdSMRIQLfdgddqLKG-----eltdgaksldlgvrdgyrihavdvtggned</p> <p><b>SARST:</b> aliSize=72 (resi) RMSD=13.76 (Å)<br/> q-KIVVHLRAT---GGAPILKqSKFKVSGSDKFNVIDFLRRQLHSD--SLFVYV-----NSAFSPNPDESVIDlynnNFGFDGKLVVNYAC-----smaw<br/> -mTEVDLEITIN--TDFP-MEKKYPAGMSLNDLKKKLELVVGTtvdSMRIQLfdgddQLKGEITDGAKSLK---LGVRDGYRIHAVDVTGgned----</p> <p><b>BLAST:</b> aliSize=5 (resi) iden=5.95% (5/84) simi=5.95% (5/84)<br/> qkivvhlra-----TGAPILK-----qskfkvsgdkfanvidflrrqlhsdslfvynsafspnpdesvidlynnfgfdgklvnyacsmaw<br/> -----mtevydleitnatdfpmekkypagmslndlkkklelvvgttvdsmriqlfdgddqkgeITDGAKSLKldlgvrdgyrihavdvtggned-----</p> <p><b>Proposed:</b> aliSize=76 (resi) RMSD=2.08 (Å)<br/> --QKIVVHLRATggPILKqSKFKVSGSDKFNVIDFLRRQLHSD--SLFVYV-----NSAFSPNPDESVIDlynnNFGFDGKLVVNYAC-----SMaW<br/> mtEVDLEITIN--TDFP-MEKKYPAGMSLNDLKKKLELVVGTtvdSMRIQLfdgddqLKGELTDGAKSLKDL--GVRDG--YRIHAVDvtggNE-D</p>                           |
| 58 | 1wz3A<br>(84) | C | 8.54 | <p><b>TM-align:</b> aliSize=48 (resi) RMSD=2.90 (Å)<br/> qKiVHLRAT--GG--APILKqSKFKVSGSDKFNVIDFLRRQLHSD--SLFVYV--NSAFspnpdesvidlynnfgfdgklvnyacsmaw-----<br/> -M-QIFVKTLtqVRelVGGKT-ITLEVEPSLTIENVKAKIQDKEGIPpDQORLIfaGK-----qledgrtldyniqkestlhlvlrlrg</p> <p><b>SARST:</b> aliSize=55 (resi) RMSD=13.41 (Å)<br/> qkivvhlratggapilkqs-----KFKVSGSDKFNVIDFLRRQLHSD--SLFVYVNSAFSPNPDESVIDlynnNFGFDGKLVVNY-----acsmaw<br/> -----mqifvktltqvrelvggkITLEVEPSLTIENVKAKIQDKEGIPpDQORLIfaGKLEDRGRTLS---YNIQKESTLHLVlrlrg-----</p> <p><b>BLAST:</b> aliSize=7 (resi) iden=7.32% (6/82) simi=8.54% (7/82)<br/> qkivvhlratggapil-----KQSKFKVSGSDKFNVIDFLRRQLHSD--SLFVYVNSAFSPNPDESVIDlynnNFGFDGKLVVNY-----idflrrqlhsdslfvynsafspnpdesvidlynnfgfdgklvnyacsmaw<br/> -----mqifvktltqvrelvggKITLEVEPSLTIENVKAKIQDKEGIPpDQORLIfaGKLEDRGRTLS---YNIQKESTLHLVlrlrg-----</p> <p><b>Proposed:</b> aliSize=70 (resi) RMSD=2.25 (Å)<br/> qkIVVHLRAT--GG---aPILKqSKFKVSGSDKFNVIDFLRRQLHSD--SLFVYVNSAFSPNPDESVIDlynnNFGfdGKLVVNYAC-----smaw<br/> --MQIFVKTLtqVRelvg-GKT--ITLEVEPSLTIENVKAKIQDKEGIPpDQORLIfaGKLEDRGRTLS---YNIQ--KESTLHLVlrlrg----</p> |
| 59 | 1wz3A<br>(84) | C | 6.41 | <p><b>TM-align:</b> aliSize=49 (resi) RMSD=2.57 (Å)<br/> ----QKIVVHLRATgGAPILKqSKFKVSGSDKFNVIDFLRRQLHSD--SLFVYVNSAFspnpdesvidlynnfgfdgklvnyacsmaw-----<br/> tetsQLQLRVOGK-EKHQT--LEVSLSRDSPLKTLMSHYEEaMGLsGRKLSFFDGT-----klsgrelpadlgmesgdliewvg</p> <p><b>SARST:</b> aliSize=56 (resi) RMSD=13.07 (Å)<br/> qkivvhlratggapilk-----QSKFKVSGSDKFNVIDFLRRQLHSDSLFVYVNSAF--SPNP-DVidLYnnNFGFDGKLVVNY-acsmaw<br/> -----tetsqqlrvqgkekhqTLEVSLSRDSPLKTLMSHYEEAMG--LSGRKLSFFDGTKLsGREL---PADLGMESDLEIvwg-----</p> <p><b>BLAST:</b> aliSize=10 (resi) iden=5.13% (4/78) simi=12.82% (10/78)<br/> qkivvhlratggapilkqskfkvsgdkfanvidflrrqlhsdslfvynsafsp-----NDESVIDLYNN-FDFGK-----lvnyacsmaw<br/> -----tetsqqlrvqgkekhqtlevsrsrdsplkTLMSHYEEaMGLsGRKLSFFDGTklsgrelpadlgmesgdliewvg-----</p> <p><b>Proposed:</b> aliSize=71 (resi) RMSD=2.19 (Å)<br/> ----QKIVVHLRATgG-aPILKqSKFKVSGSDKFNVIDFLRRQLHSD--SLFVYV-nSAFSPNPDESVIDlynnNFGfdGKLVVNYACsmaw<br/> tetsQLQLRVOGK-Ek-HQT--LEVSLSRDSPLKTLMSHYEEaMGLsGRKLSFFDGTKLsGRELPAI---GME--SGDLIEVWG----</p>                                                                                  |
|    | 2jxxA<br>(78) |   |      |                                                                                                                                                                                                                                                                                                                                                                                                                                                                                                                                                                                                                                                                                                                                                                                                                                                                                                                                                                                                                                                                                                                             |

|    |                |   |      |                                                                                                                                                                                                                                                                                                                                                                                                                                                                                                                                                                                                                                                                                                                                                                                                                                                                                                                                                                                                                                                                                                                                                         |
|----|----------------|---|------|---------------------------------------------------------------------------------------------------------------------------------------------------------------------------------------------------------------------------------------------------------------------------------------------------------------------------------------------------------------------------------------------------------------------------------------------------------------------------------------------------------------------------------------------------------------------------------------------------------------------------------------------------------------------------------------------------------------------------------------------------------------------------------------------------------------------------------------------------------------------------------------------------------------------------------------------------------------------------------------------------------------------------------------------------------------------------------------------------------------------------------------------------------|
| 60 | 1wz3A<br>(84)  | C | 8.45 | <p><b>TM-align:</b> aliSize=46 (resi) RMSD=2.59 (Å)<br/> qkiVVHLRATGGAPILkqSKFKVSGSKDFANVIDFLRRQLHSD--SLFVYVNSAfsnpdesvidlynnfgfdgklvnyacsmaw-----<br/> ---LQLFIKILTGKTF--TVEME-PSLTIENLKAKIQDKEGIPpdQORLIFAGK-----qledgrtIsdyniqestlhvl</p> <p><b>SARST:</b> aliSize=67 (resi) RMSD=12.30 (Å)<br/> qki-VVHLRATGGAPILkqskFKVSGSKDFANVIDFLRRQLHSD--SLFVYVNSAFSPNPDESvidLYNFGFDGKLVVNY-acsmaw<br/> ---IQLFIKILTGTFT---VEMEPSDTIENLKAKIQDKEGIPpdQORLIFA-GKQLEDGRT---SDYNIQESTLHLV1-----</p> <p><b>BLAST:</b> aliSize=6 (resi) iden=4.23% (3/71) simi=8.45% (6/71)<br/> qkiVVHLRATGGAPILkqskfkvsgskdfanvidflrrqlhsdlsfvyvnsafsnpdsvldlynnfgf-----GKLVVNY-----acsmaw<br/> -----lqlfiktltgkftvmeppsdtienlkakiqkgeippdqrlifagkqledgrtIsdyniqestlhvl-----</p> <p><b>Proposed:</b> aliSize=69 (resi) RMSD=2.22 (Å)<br/> qkiVVHLRATGGAPILkqSKFKVSGSKDFANVIDFLRRQLHSD--SLFVYVNSAFSPNPDESVIDLYNFGFDGKLVVNYACSMaw<br/> ---LQLFIKILTGKTF--TVEME-PSLTIENLKAKIQDKEGIPpdQORLIFA-GKQLEDGRTLSY--NIQ--KESTLHLVL-----</p>                                                                                                                                                    |
| 61 | 1wz3A<br>(84)  | C | 7.89 | <p><b>TM-align:</b> aliSize=47 (resi) RMSD=2.84 (Å)<br/> qKiVHLRATgGAPILkqSKFKVSGSKDFANVIDFLRRQLHSD-SLFVYV-NSAfsnpdesvidlynn-----Fgfdgklvnyacsmaw<br/> -M-QVFLKLTGKT--VTIEVEPSLTVENFKAKIQDKEGIPpdQORLIFAGK-----qledgrtIsdyniqestihvlrlrgG-----</p> <p><b>SARST:</b> aliSize=67 (resi) RMSD=11.74 (Å)<br/> qKiv-VHLRATGGAPILkqskFKVSGSKDFANVIDFLRRQLHSD-DLSFVYVNSAFSPNPDESVIDLYNFGFDGKLVV-----nyacsmaw<br/> ---mQVFLKLTGKT--TIEVEPSLTVENFKAKIQDKEGIPpdQORLIFAGKQLEDGRT--LSDYNIQESTIHLVlrlrgG-----</p> <p><b>BLAST:</b> aliSize=6 (resi) iden=6.58% (5/76) simi=7.89% (6/76)<br/> qKiv-----VHLRATGGAPILkqskfkvsgskdfanvidflrrqlhsdlsfvyvnsafsnpdsvldlynnfgfdgklvnyacsmaw<br/> ----mqvflkltgkvtievepsdtvenfkakiqkgeippdqrlifagkqledgrtIsdyniqestihvlrlrgG-----</p> <p><b>Proposed:</b> aliSize=73 (resi) RMSD=2.55 (Å)<br/> qkiVVHLRATGGAPILkqSKFKVSGSKDFANVIDFLRRQLHSD--SLFVYVNSAFSPNPDESVIDLYNFG-fdGKLVVNYACSMaw<br/> ---MQVFLKLTGKT--TIEVE-PSLTVENFKAKIQDKEGIPpdQORLIFAG-KQLEDGRTLSY--NI-Qk--ESTIHLVLRG</p>                                                                                                                                             |
| 62 | 1wz3A<br>(84)  | C | 2.38 | <p><b>TM-align:</b> aliSize=50 (resi) RMSD=2.91 (Å)<br/> -----QKIVVHLRATggAPILkqSKFKVSGSKDFANVIDFLRRQLHSD--SLFVYVNSAFspnpdesvidlynnfgfdgklvnyacsm-----Aw-----<br/> gssgssGRMLDFRVEY--RDRN-VDVV-LEDTCTVGEIKQILENELQIPvsKMLLKGWKTG-----dvedstvlkslhlp-knnslyvltplppsssshagalqesln</p> <p><b>SARST:</b> aliSize=63 (resi) RMSD=12.04 (Å)<br/> q-KIVVHLRATGGAPILK--QSKFKVSGSKDFANVIDFLRRQLHSD--SLFVYVNSAFSPNPDESVIDL-----ynnfgfdgklvnyacsmaw<br/> -gSSGSSGRMLDFRVEYrdRNDVVLEDTCTVGEIKQILENELQIPvsKMLLKGWKTGDVEDSTVLKSLhlpknnslyvltplppsssshagalqesln-----</p> <p><b>BLAST:</b> aliSize=22 (resi) iden=17.86% (15/84) simi=26.19% (22/84)<br/> qkiVVHLRATGGAPILkq-----SKFKVSGSKDFANVIDFLRRQLHSD--SDSLfvVNSAFSPNPDES-----vidlynnfgfdgklvnyacsmaw<br/> -----gssgssgrmlDFRVEYrdRNDVVLEDTCTVGEIKQILENELQIPvsKMLLKGW-KTGDVEDSTVLKSLhlpknnsL--VLTPLPPSSSshagalqesln-----</p> <p><b>Proposed:</b> aliSize=70 (resi) RMSD=2.19 (Å)<br/> -----QKIVVHLRATggAPILkqSKFKVSGSKDFANVIDFLRR-QLHS-DLSFVYVnsA--FSPNPDESVIDLYNfgfdGKLVVNYACS-----maw<br/> gssgssGRMLDFRVEY--RDRN--VDVVLEDTCTVGEIKQILENELQIPvsKMLLKGW--WktGDVEDSTVLKSLH--LP-KNNSLYVLTPLppsssshagalqesln-----</p> |
|    | 2dzmA<br>(100) |   |      |                                                                                                                                                                                                                                                                                                                                                                                                                                                                                                                                                                                                                                                                                                                                                                                                                                                                                                                                                                                                                                                                                                                                                         |

|    |               |   |      |                                                                                                                                                                                                                                                                                                                                                                                                                                                                                                                                                                                                                                                                                                                                                                                                                                                                                                                                                                                                                                                                                                                                             |
|----|---------------|---|------|---------------------------------------------------------------------------------------------------------------------------------------------------------------------------------------------------------------------------------------------------------------------------------------------------------------------------------------------------------------------------------------------------------------------------------------------------------------------------------------------------------------------------------------------------------------------------------------------------------------------------------------------------------------------------------------------------------------------------------------------------------------------------------------------------------------------------------------------------------------------------------------------------------------------------------------------------------------------------------------------------------------------------------------------------------------------------------------------------------------------------------------------|
| 63 | 1wz3A<br>(84) | C | 8.33 | <p><b>TM-align:</b> aliSize=48 (resi) RMSD=3.03 (Å)<br/> q-----KIVVHLRATGGAPILkqSKFKVSGsDKFANVIDFLRRQLHSD--SLFVYVNSAfsnpndesvidlynnfgfdgklvnyacsmaw-----<br/> -gssgsSGLEVVKLDSQTR--TFIVGAQMNVKEFKHEIAASVSIPseKQRLIYQGR-----vlqddkklqeynvggkvihlverapsgpsg</p> <p><b>SARST:</b> aliSize=70 (resi) RMSD=12.57 (Å)<br/> q-----KIVVHLRATGGAPILkqSKFKVSGsDKFANVIDFLRRQLHSD--DSLFFVYVNSAFSPNPDESVIDLynfGfdGKLVVNYA-----csmaw<br/> -gssgsSGLEVVKLDSQTR--TFIVGAQMNVKEFKHEIAASVSIPseKQRLIYQGRVLQDQKKLOEY--NVC--GKVIHLVERapsgpsg----</p> <p><b>BLAST:</b> aliSize=10 (resi) iden=7.14% (6/84) simi=11.90% (10/84)<br/> qkivvhlratggapilkqskfkvsgsdkfavidflrrqlhsdlsfvyvnsafsnpndesvidlynnfgfdgklvnyacsmaw-----<br/> -----gssgsgglevlvktldsqrtrtfivgaqmnvkefkehiiaasvsipsekqrllygrvlqddkklqeynvggkvihlverapsgpsg-----</p> <p><b>Proposed:</b> aliSize=71 (resi) RMSD=2.51 (Å)<br/> q-----KIVVHLRATGGAPILkqSKFKVSGsDKFANVIDFLRRQLHSD--SLFVYVNSAFSPNPDESVIDLynfGfdGKLVVNYAC--S-----maw<br/> -gssgsSGLEVVKLDS-QT--RTTFIVGAQMNVKEFKHEIAASVSIPseKQRLIYQGRVLQDQKKLOEYN---V--GKVIHLVERapsgpsg---</p>                                                          |
| 64 | 1wz3A<br>(84) | C | 7.14 | <p><b>TM-align:</b> aliSize=54 (resi) RMSD=2.88 (Å)<br/> -----Q-----KIVVHLRATGGAPILkqSKFKVSGsDKFANVIDFLRRQLHSDSLFVYVNSAFsnpndesvidlynn-Fgfdgklvnyacs-----AW-----<br/> gssgsSgphsmePOVTLNVTfkn-EIQ--SFLVSDpENTTWADIEAMVKVSFDLNTIQIKYLDEE-----nE-----evsinsqgeyeealkmavkqgnqlmqvhegsgpsg</p> <p><b>SARST:</b> aliSize=64 (resi) RMSD=12.49 (Å)<br/> qk-----IIVVHLRATGGAPILkqSKFKVSGsDKFANVIDFLRRQLHSDs1fvyvnsafsnpndesvidlynnfgfdgklvnyacs-----csmaw<br/> --gssgsgphsmePOVTLNVTfknE-----IQSFLVSDpENTTWADIEAMVKVSFDLNTIQIKYLDEEneEvsinsqgeyeealkmavkqgnqlmqvhegsgpsg-----</p> <p><b>BLAST:</b> aliSize=2 (resi) iden=2.38% (2/84) simi=2.38% (2/84)<br/> qkivvhlratggapilkqskfkvsgsdkfavidflrrqlhsdlsfvyvnsafsnpndesvidlynnfgfdgklvnyacsmaw-----<br/> -----gssgsgphsmePOVTLNVTfknEIQSFLVSDpENTTWADIEAMVKVSFDLNTIQIKYLDEEneEvsinsqgeyeealkmavkqgnqlmqvhegsgpsg-----</p> <p><b>Proposed:</b> aliSize=74 (resi) RMSD=2.19 (Å)<br/> -----QKIVVHLRATGGAPILkqSKFKVSGsDKFANVIDFLRRQLHSDSLFVYVNSAFSPNPDESVIDLynfGfdGKLVVNYAC-----smaw<br/> gssgsgphsmePOVTLNVTfknEIQSFLVSDpENTTWADIEAMVKVSFDLNTIQIKYLDEEneEvsinsqgeyeealkmavkqgnqlmqvhegsgpsg-----</p> |
| 65 | 1wz3A<br>(84) | C | 8.22 | <p><b>TM-align:</b> aliSize=46 (resi) RMSD=1.95 (Å)<br/> qKIVVHLRATGGAPILkqSKFKVSGsDKFANVIDFLRRQLHSD--SLFVYVNSAfsnpndesvidlynnfgfdgklvnyacsmaw-----<br/> -MIEVNCNDRLE-KKV--RVK-CNTDDTIGDLKKLIAAQTGRwnKIVLKKWY-----tifkdhvslgdyehdgmnllyyq</p> <p><b>SARST:</b> aliSize=59 (resi) RMSD=13.42 (Å)<br/> qkivvhlratggapilk-----QSKFKVSGsDKFANVIDFLRRQLHSDSLFVYVNSAFSPNPDESVIDLynfGfdGKLVVNYAC-----csmaw<br/> -----mi evvcndrlgkKVRVKCNTDDTIGDLKKLIAAQTGRwnKIVLKKWYTIKDHVSL--GDYEIHDGMNLELYQ----</p> <p><b>BLAST:</b> aliSize=0 (resi) iden=0.00% (0/73) simi=0.00% (0/73)<br/> qkivvhlratggapilkqskfkvsgsdkfavidflrrqlhsdlsfvyvnsafsnpndesvidlynnfgfdgklvnyacsmaw-----<br/> -----mi evvcndrlgkKVRVKCNTDDTIGDLKKLIAAQTGRwnKIVLKKWYTIKDHVSL--GDYEIHDGMNLELYQ----</p> <p><b>Proposed:</b> aliSize=71 (resi) RMSD=2.21 (Å)<br/> qKIVVHLRATGGAPILkqSKFKVSGsDKFANVIDFLRRQLHSD--SLFVYVNSAFSPNPDESVIDLynfGfdGKLVVNYACsmaw<br/> -MIEVNCNDRLE-KKV--RVK-CNTDDTIGDLKKLIAAQTGRwnKIVLKKWYTIKDHVSL--GDYEIHDGMNLELYQ----</p>                                                                                                                                    |
|    | 1p0rA<br>(73) |   |      |                                                                                                                                                                                                                                                                                                                                                                                                                                                                                                                                                                                                                                                                                                                                                                                                                                                                                                                                                                                                                                                                                                                                             |

|    |               |   |       |                                                                                                                                                                                                                                                                                                                                                                                                                                                                                                                                                                                                                                                                                                                                                                                                                                                                                                                                                                                                                                                                                                                                                                  |
|----|---------------|---|-------|------------------------------------------------------------------------------------------------------------------------------------------------------------------------------------------------------------------------------------------------------------------------------------------------------------------------------------------------------------------------------------------------------------------------------------------------------------------------------------------------------------------------------------------------------------------------------------------------------------------------------------------------------------------------------------------------------------------------------------------------------------------------------------------------------------------------------------------------------------------------------------------------------------------------------------------------------------------------------------------------------------------------------------------------------------------------------------------------------------------------------------------------------------------|
| 66 | 1wz3A<br>(84) | C | 7.79  | <p><b>TM-align:</b> aliSize=49 (resi) RMSD=2.65 (Å)<br/> qkIVVHLRATGAPILkqSKFKVSGSDK FANVIDFLRRQLHSD--SLFVYVNSAFspnpdesvidlynnfgfdgklvnyacsmaw-----<br/> -SMWIQVRTMDGRQTH--TVDSLRLTVEELRRKIQELFIVEpgLQRLFYRKG-----qmedghtlfdyevrIndtiqlivrqs</p> <p><b>SARST:</b> aliSize=57 (resi) RMSD=14.77 (Å)<br/> qkivvhlratggapilkqs-----KFKVSGSDK FANVIDFLRRQLHSD--DSLFFVYVNSAFSPNPDESviDLYNNFGFDGKLVVNYAC-smaw<br/> -----smwiqvr tmdgrqthtVDSLRLTVEELRRKIQELFIVEpgLQRLFYRKGQMED--GHT--LFDYEVRLNDTIQLLVRQs----</p> <p><b>BLAST:</b> aliSize=0 (resi) iden=0.00% (0/77) simi=0.00% (0/77)<br/> qkivvhlratggapilkqskfkvsgsdkf fanvidflrrqlhsdlfvvyvnsafspnpdesvidlynnfgfdgklvnyacsmaw-----<br/> -----smwiqvr tmdgrqthtvdslsr ltkveelrrkiqel fhvepglqrlfyrgkqmedghtlfdyevrIndtiqlivrqs</p> <p><b>Proposed:</b> aliSize=73 (resi) RMSD=2.33 (Å)<br/> qkIVVHLRATGAPILkqSKFKVSGSDK FANVIDFLRRQLHSD--SLFVYVNSAFSPNPDESVIDLYNNFGfdGKLVVNYACS--maw<br/> -SMWIQVRTMDGRQTH--TVDSLRLTVEELRRKIQELFIVEpgLQRLFYR-GKQMEDGHTLFY--EVR--LNDTIQLLVRQs---</p>                                                                                                                                 |
| 67 | 1wz3A<br>(84) | C | 11.90 | <p><b>TM-align:</b> aliSize=55 (resi) RMSD=3.31 (Å)<br/> -----KIVVHLRAtggAPILkQSKFKVSGSDK FANVIDFLRRQLHSDSLFVYVNSAFspnpdesvidlynNFgfdgklvnyacs-----M--AW-----<br/> smalgpfpamVLIIRIKI---PNSG-AVDWTHSQLLFRDVLVIGQVPeATTITAFEYEDEDG-----DR-----itvrsdeemkamsyysTvmEQvngqli eplqifpra</p> <p><b>SARST:</b> aliSize=52 (resi) RMSD=6.81 (Å)<br/> qk-----IVVHLRATGGAPILkqSKFKVSGSDK FANVIDFLRRQLHSDSLFVYVNSAFSPNPDES-----vidlynnfgfdgklvnyacsmaw<br/> --smalgpfpamqVLIIRIKIPNSGAV---DWTTHSQLLFRDVLVIGQV---LPEATITAFEYEDEDGDRitvrsdeemkamsyys tvmeqqvngqli eplqifpra-----</p> <p><b>BLAST:</b> aliSize=11 (resi) iden=9.52% (8/84) simi=13.10% (11/84)<br/> qkivvhlratggapilkqskfkvsgsdkf fanvidflrrq-----LHSDSLFVYVNSAFSPNPDESVIDLYNNFGFDG-----klvnyacsmaw<br/> -----smalgpfpamqvlvirikipnsgavdwtVHSQLLFRDVLVIGQVLPeATTITAFEYEDEDGDRitvrsdeemkamsyys tvmeqqvngqli eplqifpra-----</p> <p><b>Proposed:</b> aliSize=76 (resi) RMSD=2.89 (Å)<br/> -----KIVVHLRAtggAPILkQSKFKVSGSDK FANVIDFLRRQLHSDSLFVYVNSA----FSPNPDESVIDLYNNFG--F-----DGKLVVNYACsmaw<br/> smalgpfpamVLIIRIKI---PNSG-AVDWTHSQLLFRDVLVIGQVPeATTITAFEYEDEDGDRITVRSDEEMKAMLSYYstVmeqqvngqliEPQLFPRA----</p> |
| 68 | 1wz3A<br>(84) | C | 10.71 | <p><b>TM-align:</b> aliSize=54 (resi) RMSD=3.43 (Å)<br/> ---QKIVVHLRAT--GG-APILkqSKFKVSGSDK FANVIDFLRRQLHSD--D--SLFVYVNSAFspnpdesvidlynn-FGfdgklvnyacs-----MAW-----<br/> qqvGDCCIIRVSLDvDNgNMYK--SIL--TSQDKAPAVIRKAMDkHNLeeEepeDYELLQILS-----dDR-----kIki penanvfyamNSTanydfvlkkr tft</p> <p><b>SARST:</b> aliSize=72 (resi) RMSD=11.96 (Å)<br/> q---KIVVHLRATGGAPILKQSKFKVSGSDK FANVIDFLRRQLHSD-----DSLFFVYV--NSAFSPNPDESvidLYNNF----GFDGKLVN----yacsma<br/> -wqqvGDCCIIRVSLDvDNgNMYKSIL--TSQDKAPAVIRKAMDkHNLeeEepeDYELLQILSDRKLKIPENAN----VFYAmnstANYDFVLKkr tft-----</p> <p><b>BLAST:</b> aliSize=6 (resi) iden=5.95% (5/84) simi=7.14% (6/84)<br/> qkivvhlratggapilkqskfk-----SGSDK FANVIDFLRRQLHSDSLFVYVNSAFspnpdesvidlynnfgfdgklvnyacsmaw<br/> -----qqvgdccii rvsldvdngnmysil--TSQDKAPAVIRKAMDkHNLeeEepeDYELLQILSDRKLKIPENANFYAM--StAN--YDFVLKkr tft-----</p> <p><b>Proposed:</b> aliSize=70 (resi) RMSD=2.67 (Å)<br/> ---QKIVVHLRATGG--apILkqSKFKVSGSDK FANVIDFLRR--QLHSD-----s lfvvyNSAFsPNPDESVIDLYNNFGfdGKLVVNYA-Csmaw<br/> qqvGDCCIIRVSLDvDNg--NMY--KSIL--TSQDKAPAVIRKAMDkHNLeeEepeDYELLQILSD-----DRKLKIPENANFYAM--StAN--YDFVLKkrTFT--</p>            |
|    | 1raxA<br>(93) |   |       |                                                                                                                                                                                                                                                                                                                                                                                                                                                                                                                                                                                                                                                                                                                                                                                                                                                                                                                                                                                                                                                                                                                                                                  |

|    |                                                    |   |      |                                                                                                                                                                                                                                                                                                                                                                                                                                                                                                                                                                                                                                                                                                                                                                                                                                                                                                                                                                                                                                                                                                                                                          |
|----|----------------------------------------------------|---|------|----------------------------------------------------------------------------------------------------------------------------------------------------------------------------------------------------------------------------------------------------------------------------------------------------------------------------------------------------------------------------------------------------------------------------------------------------------------------------------------------------------------------------------------------------------------------------------------------------------------------------------------------------------------------------------------------------------------------------------------------------------------------------------------------------------------------------------------------------------------------------------------------------------------------------------------------------------------------------------------------------------------------------------------------------------------------------------------------------------------------------------------------------------|
| 69 | <p>1wz3A<br/>(84)</p> <hr/> <p>2cu1A<br/>(103)</p> | C | 4.76 | <p><b>TM-align:</b> aliSize=53 (resi) RMSD=3.09 (Å)<br/> ---Q--KIIVHLRATgGAPILkqSKFkVSGSDKFNANVIDFLRRQLHSDsLFVYVNSAFspnpdesvidlynnfgfdgklvnyacs-----MAW-----<br/> gssGssGDVRVKFEHR-RGEKR--ILQ-FPRPVKLEDLRSKAKIAFGQSMDLHYTNNELV-----iplttqddldkavellDRSIhmkslkillvingsqtatnlepgpssg</p> <p><b>SARST:</b> aliSize=44 (resi) RMSD=2.72 (Å)<br/> q-----KIIVHLRATGgAPILkqskFKVSGSDKFNANVIDFLRRQLHSDSLFVYV-----nSAFspnpdesvidlynnfgfdgklvnyacsmaW<br/> -gssGssGDVRVKFEHR-GEKRI---LQFPRPVKLEDLRSKAKIAFGQSMDLHYTnnelviplttqddldkavellDRSIhmkslkillvingsqtatnlepgpssg-----</p> <p><b>BLAST:</b> aliSize=0 (resi) iden=0.00% (0/84) simi=0.00% (0/84)<br/> qkiVVHLRATgGAPILkqskfkvsgsdKfanvidflrrqlhsdslfvyvnsafspnpdesvidlynnfgfdgklvnyacsmaW-----<br/> -----gssGssGDVRVKFEHRGEKRIlqfprpvkledlrskakiAFGQSMDLHYTnnelviplttqddldkavellDRSIhmkslkillvingsqtatnlepgpssg-----</p> <p><b>Proposed:</b> aliSize=73 (resi) RMSD=2.44 (Å)<br/> -----KQIVVHLRATgGAPILkqSKFkVSGSDKFNANVIDFLRRQLHSDsLFVYVNSA---FSPNPDESVIDLYNNfG---FDGKLVVNYAC-----smaw<br/> gssGssGDVRVKFEHR-GEKRI---LQFPRPVKLEDLRSKAKIAFGQSMDLHYTNNELVPLTQDDLDKAVEL-LDRSIHMKSILLVIngstqatnlepgpssg-----</p> |
| 70 | <p>1wz3A<br/>(84)</p> <hr/> <p>1u4aA<br/>(79)</p>  | C | 5.06 | <p><b>TM-align:</b> aliSize=48 (resi) RMSD=2.29 (Å)<br/> -KQIVVHLRATgGAPILkqSKFkVSGSDKFNANVIDFLRRQLHSD--SLFVYVNSAFspnpdesvidlynnfgfdgklvnyacsmaW-----<br/> ndHINLKVAGQ--DGSV--VQFKIKRHTPLSKLMKAYSERQGLsmrQIRFRFDGQ-----pinetdtpaqlemededtidvfqqqtgg</p> <p><b>SARST:</b> aliSize=71 (resi) RMSD=13.06 (Å)<br/> q--KIVVHLRATGgAPILkqskFKVSGSDKFNANVIDFLRRQLHSD--SLFVYVNSAFSPNPDESVIDLYNNFGfdgklVNYA-----csmaw<br/> -ndHINLKVAGQDGSVQ---FKIKRHTPLSKLMKAYSERQGLsmrQIRFRFDGQPI-ETDTPAQLEMEDED---TIDVFQqqtgg-----</p> <p><b>BLAST:</b> aliSize=6 (resi) iden=5.06% (4/79) simi=7.59% (6/79)<br/> qkiVVHLRATgGAPILkqskfkvsgsdKfanvidflrrqlhsdslfvyvnsafspnp-----DESVIDLY-----nnfgfdgklvnyacsmaW<br/> -----ndhinlkvagqDGSVQFKIKRHTPLSKLMKAYSERQGLsmrQIRFRFDGQPI-ETDTPAQLEMEDEDTIDVFQqqtgg-----</p> <p><b>Proposed:</b> aliSize=71 (resi) RMSD=2.22 (Å)<br/> -KQIVVHLRATgGAPILkqSKFkVSGSDKFNANVIDFLRRQLHSD--SLFVYVNSAFSPNPDESVIDLYNNFGfdGKLVVNYAC-----smaw<br/> ndHINLKVAGQ--DGSV--VQFKIKRHTPLSKLMKAYSERQGLsmrQIRFRFDGQPI-ETDT--PAQLE-ME-DEDTIDVFQqqtgg-----</p>                                                                                                 |
| 71 | <p>1wz3A<br/>(84)</p> <hr/> <p>1c3tA<br/>(76)</p>  | C | 9.21 | <p><b>TM-align:</b> aliSize=46 (resi) RMSD=2.67 (Å)<br/> qkiVVHLRATGgAPILkqSKFkVSGSDKFNANVIDFLRRQLHSD--SLFVYVNSAFspnpdesvidlynnfgfdgklvnyacsmaW-----<br/> ---MQLFVKILTGKTI---TVELE-PSDTVENLkAKIQDKEGIPpDQQRILFAGK-----qledgrtIsdynlqkestihlvrlrgg</p> <p><b>SARST:</b> aliSize=68 (resi) RMSD=12.14 (Å)<br/> qkiV-VHLRATGgAPILkqskFKVSGSDKFNANVIDFLRRQLHSD-SLFVYVNSAFSPNPDESVIDLYNNFGFDGKLVNY-----acsmaw<br/> ---mQLFVKILTGKTI---TVELE-PSDTVENLkAKIQDKEGIPpDQQRILFAGKQLEDGRT---SDYNLQKESTIHLVlrlrgg-----</p> <p><b>BLAST:</b> aliSize=6 (resi) iden=6.58% (5/76) simi=7.89% (6/76)<br/> qkiV-----VHLRATGgAPILkqskfkvsgsdKfanvidflrrqlhsdslfvyvnsafspnpdesvidlynnfgfdgklvnyacsmaW<br/> ----mqlfvkiltgkiltvelepsdtvenlkakiqkegippdqqrliFAGKqledgrtIsdynlqkestihlvrlrgg-----</p> <p><b>Proposed:</b> aliSize=70 (resi) RMSD=2.38 (Å)<br/> qkiVVHLRATGgAPILkqSKFkVSGSDKFNANVIDFLRRQLHSD--SLFVYVNSAFSPNPDESVIDLYNNFGfdGKLVVNYAC-S---maw<br/> ---MQLFVKILTGKTI---TVELE-PSDTVENLkAKIQDKEGIPpDQQRILFAGKQLEDGRTLSY--NLQ--KESTIHLVlrlrgg-----</p>                                                                                                                  |



|    |                |   |      |                                                                                                                                                                                                                                                                                                                                                                                                                                                                                                                                                                                                                                                                                                                                                                                                                                                                                                                                                                                                                                                                                                                                                                                                                                                     |
|----|----------------|---|------|-----------------------------------------------------------------------------------------------------------------------------------------------------------------------------------------------------------------------------------------------------------------------------------------------------------------------------------------------------------------------------------------------------------------------------------------------------------------------------------------------------------------------------------------------------------------------------------------------------------------------------------------------------------------------------------------------------------------------------------------------------------------------------------------------------------------------------------------------------------------------------------------------------------------------------------------------------------------------------------------------------------------------------------------------------------------------------------------------------------------------------------------------------------------------------------------------------------------------------------------------------|
| 72 | 1wz3A<br>(84)  | C | 9.21 | <p><b>TM-align:</b> aliSize=47 (resi) RMSD=2.70 (Å)<br/> qkiVVHLRAtGGAPILkqSKFKVsGSDKfANVIdFLRRQLHSDS-LFVYNSAFspnpdesvidlynnfgfdgklvnyacsmaw-----<br/> ---MQIFVKLTGKTI--TLEVESSDTIDNVKSKIQDKEGIPpDQORLIFAGK-----qledgrtIsdyniqkestlHsvlrlrgg</p> <p><b>SARST:</b> aliSize=69 (resi) RMSD=12.46 (Å)<br/> qkiv-VHLRAAtGGAPILkqSKFKVSGSDKfANVIdFLRRQLHSDS-SLFVYNSAFSPNPDESvidLYNFGFDGKLVVNYA-----csmaw<br/> ---mQIFVKLTGKTI--TLEVESSDTIDNVKSKIQDKEGIPpDQORLIFAGKQLEDGRT--SDYNIQKESTLHsvlrlrgg----</p> <p><b>BLAST:</b> aliSize=7 (resi) iden=7.89% (6/76) simi=9.21% (7/76)<br/> qkivvhlratggapil-----KQSKFKVSGSDKfANV-----idflrrqlhsdslfvyvnsafspnpdesvidlynnfgfdgklvnyacsmaw<br/> -----mqifvktltgkTITLEVESSDTIDNVKSKIQDKEGIPpDQORLIFAGKQLEDGRTLSY--NIQ--KESTLHsvlrlrgg-----</p> <p><b>Proposed:</b> aliSize=71 (resi) RMSD=2.40 (Å)<br/> qkIVVHLRAAtGGAPILkqSKFKVSGSDKfANVIdFLRRQLHSDS-SLFVYNSAFSPNPDESVIDLYNFGFDGKLVVNYACS----maw<br/> --MQIFVKLTGKTI--TLEVESSDTIDNVKSKIQDKEGIPpDQORLIFAGKQLEDGRTLSY--NIQ--KESTLHsvlrlrgg---</p>                                                                                                                                                                                                                    |
| 73 | 1wz3A<br>(84)  | C | 8.33 | <p><b>TM-align:</b> aliSize=60 (resi) RMSD=4.12 (Å)<br/> ---QKIVVHLRAtGGAPILkqSKFKVsGSDKfANVIdFLRRQLHSDS-LFVYNSAFSPNPDESVIDLYNFGFDGKLVVNYACS-----MAW-----<br/> sseEESFFVQVHD-VSHE---qplTVIKAP-R-VSTaQDVIL-QQTLCKakysysilsnPNpSDYVLLLEEVVKDITNKTT--TP-KS-----sqrvldqecvfqaqskwkG-gkfilklkeqvqasredk</p> <p><b>SARST:</b> aliSize=68 (resi) RMSD=9.12 (Å)<br/> q-----KIVVHLR--ATGGAPILkqSKFKVSGSDKfANVIdFLRRQLHSDS-LFVYNSAFSPNPDESVIDLYNFGFDGKLVVNYACS-----smaw<br/> --sseeSFFVQVHDV-SPEQPLTV---IKAPRVSTAQDVILQOTLCKakysysilsnPNpSDYVLLLEEVVKDITNKTT-----KTTTPKSSQRVLLDqecvfqaqskwkGgagkfilklkeqvqasredk----</p> <p><b>BLAST:</b> aliSize=11 (resi) iden=9.52% (8/84) simi=13.10% (11/84)<br/> qkivvhlratggapilqskfkvsgsdkfanvidflrrqlhs-----DSLFVYNSAFSPNPDESVIDLYNFGFDGKLVVNYACS-----dlynnfgfdgklvnyacsmaw<br/> -----sseeEESFFVQVHDV-SPEQPLTVIKAPRVSTAQDVILQOTLCKakysysilsnPNpSDYVLLLEEVVKDITNKTTTPKSSQRVLLDqecvfqaqskwkGgagkfilklkeqvqasredk-----</p> <p><b>Proposed:</b> aliSize=76 (resi) RMSD=2.93 (Å)<br/> ---QKIVVHLRAtGGAPILkqSKFKVSGSDKfANVIdFLRRQLHSDS-LFVYNSAFSPNPDESVIDLYNFGFDGKLVVNYACS-----MAW-----w<br/> sseEESFFVQVHDV-SPEQPLTVIKAPRVSTAQDVILQOTLCKakysysilsnPNpSDYVLLLEEVVKDITNKTTTPKSSQRVLLDqecvfqaqskwkGgagkfilklkeqvqasredk-</p> |
| 74 | 1wz3A<br>(84)  | C | 8.33 | <p><b>TM-align:</b> aliSize=51 (resi) RMSD=2.70 (Å)<br/> -QKIVVHLRAtGGAPILkqSKFKVsGSDKfANVIdFLRRQLHSDS-LFVYNSAFspnpdesvidlynnfgfdgklvnyacs-----MAW-----<br/> qSDVRIKFEH--NG-ER--RIIAFSRPVYEDVEHKVTTVFGQ-PLDLHYMNNEL-----silknqddldkaidildrSSsmkslriillsqdrnlchhhhhh</p> <p><b>SARST:</b> aliSize=70 (resi) RMSD=12.62 (Å)<br/> qki---VHLRAtGGAPILkqSKFKVSGSDKfANVIdFLRRQLHSDS-LFVYNSAFSPNPDESVIDLYN-----NFGfdGKLVVNYA-----csmaw<br/> ---qsdVRIKFEHNGERR---IIAFSRPVYEDVEHKVTTVFGQPLDLHYMNNELSLILKNODDLKAIIdrSSM--KSRILLsqdrnlchhhhhh-----</p> <p><b>BLAST:</b> aliSize=11 (resi) iden=9.52% (8/84) simi=13.10% (11/84)<br/> qkivvhlratggapilqskfk-----VSGSDKfANVIdFLRRQLHSDS-LFVYNSAFspnpdesvidlynnfgfdgklvnyacsmaw<br/> -----qsdvrikfehngerrIIAFSRPVYEDVEHKVTTVFGQPLDLHYMNNELSLILKNODDLKAIIdrSSSMKSRILLsqdrnlchhhhhh-----</p> <p><b>Proposed:</b> aliSize=75 (resi) RMSD=2.63 (Å)<br/> QKIVVHLRAtGGAPILkqSKFKVsGSDKfANVIdFLRRQLHSDS-LFVYNSAFSPNPDESVIDLYNFGFDGKLVVNYACS-----MAW-----<br/> QSDVRIKFEHNGERR---IIAFSRPVYEDVEHKVTTVFGQPLDLHYMNNELSLILKNODDLKAIIdrSSSMKSRILLsqdrnlchhhhhh-----</p>                                                                                                                                                       |
|    | 2jwzA<br>(76)  |   |      |                                                                                                                                                                                                                                                                                                                                                                                                                                                                                                                                                                                                                                                                                                                                                                                                                                                                                                                                                                                                                                                                                                                                                                                                                                                     |
|    | 2byfA<br>(116) |   |      |                                                                                                                                                                                                                                                                                                                                                                                                                                                                                                                                                                                                                                                                                                                                                                                                                                                                                                                                                                                                                                                                                                                                                                                                                                                     |
|    | 2jrhA<br>(93)  |   |      |                                                                                                                                                                                                                                                                                                                                                                                                                                                                                                                                                                                                                                                                                                                                                                                                                                                                                                                                                                                                                                                                                                                                                                                                                                                     |

|    |                                           |   |       |                                                                                                                                                                                                                                                                                                                                                                                                                                                                                                                                                                                                                                                                                                                                                                                                                                                                                                                                                                                                                                                                                 |
|----|-------------------------------------------|---|-------|---------------------------------------------------------------------------------------------------------------------------------------------------------------------------------------------------------------------------------------------------------------------------------------------------------------------------------------------------------------------------------------------------------------------------------------------------------------------------------------------------------------------------------------------------------------------------------------------------------------------------------------------------------------------------------------------------------------------------------------------------------------------------------------------------------------------------------------------------------------------------------------------------------------------------------------------------------------------------------------------------------------------------------------------------------------------------------|
| 75 | <p>1wz3A (84)</p> <hr/> <p>2bpsA (81)</p> | C | 11.11 | <p><b>TM-align:</b> aliSize=50 (resi) RMSD=2.72 (Å)<br/> --OKIVVHLRATGGAPILkqSKFKVSGSDFANVDFLRR-Q-LHSDSL-FVYV---NSAfsnpdesvidlynnfgfdgklvnyacsmaw-----<br/> hgSYDITITDLKHYNGSV--FDLRLSDYHPVKKVIDIAWQaOsVSMPPRegHWIRvvnkDKV-----fsgecklsdcgitngdrleil</p> <p><b>SARST:</b> aliSize=68 (resi) RMSD=11.52 (Å)<br/> qk--IVVHLRATG---GApilKQSKFKVSGSDFANVDFLRRQLHSDSLFVY--VNSA---FSPNPDESVIDLYNFGFDGKLVN-yacsmaw<br/> --hgSYDITITDLKHYNGSV--FDLRLSDYHPVKKVIDIAWQaOSVSMPPRegHWIRvvnkDKVFSGECK---SDCGITNGDRLEIL-----</p> <p><b>BLAST:</b> aliSize=13 (resi) iden=13.58% (11/81) simi=16.05% (13/81)<br/> qkivvhlratggapilkqskfkvsgsdfanvidflrrqlhdsdlfvyvnsafspnpdesv-----IDLYNFGFDGKLVN-yacsmaw<br/> -----hgSYDITITDLKHYNGSVFDLRLSDYHPVKKVIDIAWQaOsVSMPPRegHWIRvvnkDKVFSGECK---SDCGITNGDRLEIL-----</p> <p><b>Proposed:</b> aliSize=62 (resi) RMSD=2.54 (Å)<br/> --OKIVVHLRATGGAPILkqSKFKVSGSDFANVDFLRR-Q-L-----hsdslfvyvNSAFSPNPDESVIDLYNFGFDGKLVN-yacsmaw<br/> hgSYDITITDLKH-YNGSV-FDLRLSDYHPVKKVIDIAWQaOsVsmppreghwi rvvnk-----DKVFSGE--C---KSDCGIT-NGDRLEIL-----</p>               |
| 76 | <p>1wz3A (84)</p> <hr/> <p>1lfdA (87)</p> | C | 8.33  | <p><b>TM-align:</b> aliSize=55 (resi) RMSD=3.47 (Å)<br/> -QKIVVHLRATgGAPILKQSKFKVSGSDFANVDFLRR-Q-L-HSD-SLFVYVNSAFspnpdesvidlynnfgfdgkl-VVnyacsm-----W-----<br/> gDCCIIRVSLD-VDNGNMYKSIILVTSQDKAPTIVRKAM-DkhnLdedepDYELLQI-----sEDH-----kikiipenavfyamnsAnydfilkk</p> <p><b>SARST:</b> aliSize=73 (resi) RMSD=12.80 (Å)<br/> q----KIVVHLRATGgApilKQSKFKVSGSDFANVDFLRRQLHSD-----SLFVYV---SAFSPNPDESVIDLYNFGFDGKLVN-yacsmaw<br/> -gdcciIRVSLD-VDNGNMYKSIILVTSQDKAPTIVRKAMDkhnLdedepDYELLQIisedHKLKIPENANFYAMNSAANYDFILKKr-----</p> <p><b>BLAST:</b> aliSize=6 (resi) iden=5.95% (5/84) simi=7.14% (6/84)<br/> qkivvhlratggapilkqskfk-----SGSDFANV-----dfllrrqlhdsdlfvyvnsafspnpdesvidlynnfgfdgklvnyacsmaw<br/> -----gdcciirvslldvngnmysiilvtsqdkaptivrkamdkhnl dedepdyellqiisedhklkipenavfyamnsaanydfilkk-----</p> <p><b>Proposed:</b> aliSize=74 (resi) RMSD=2.62 (Å)<br/> -QKIVVHLRATgGAP-I-LkqSKFKVSGSDFANVDFLRR--Q-L-HSD--SLFVYV---NSAFSPNPDESVIDLYNFGFDGKLVN-yacsmaw<br/> gDCCIIRVSLD-VDNgNmY--KSILVTSQDKAPTIVRKAMDkhnLdedepDYELLQIisedHKLKIPENANFYAM--NSAA-NYDFILKKr----</p> |
| 77 | <p>1wz3A (84)</p> <hr/> <p>1wmhB (82)</p> | C | 10.98 | <p><b>TM-align:</b> aliSize=52 (resi) RMSD=3.15 (Å)<br/> qkIVVHLRAT-GGAPILkqSKFKVSGSDFANVDFLRRQLHSD--DSLFFVYVNSAFspnpdesvidlynn-Fgfdgklvnyacsm-----AW-----<br/> --SIVEVKSFKDAEFR--FALPRASVSGQEFsRLRAVHQIpgLDVLLGYTDAH-----gd-----lpl tndds lhralasGppplrllvqkr</p> <p><b>SARST:</b> aliSize=71 (resi) RMSD=12.16 (Å)<br/> qk--IVVHLRATGGAPILkqskfkVSGSDFANVDFLRRQLHSDSLFVYVNSAFSPNPDES-----VIDLYNFGFDGKLVN-yacsmaw<br/> --sIVEVKSFKDAEFR---FALPRASVSGQEFsRLRAVHQ--IPGLDVLGYTDAHGDLP l tnddsLHRALASGPPPLRLLVQKR-----</p> <p><b>BLAST:</b> aliSize=0 (resi) iden=0.00% (0/82) simi=0.00% (0/82)<br/> qkivvhlratggapilkqskfkvsgsdfanvidflrrqlhdsdlfvyvnsafspnpdesvidlynnfgfdgklvnyacsmaw-----<br/> -----sivevkskfdaefrrfalprasvsgqefsrllravhqipglvllgytdahgdllpl tndds lhralassgppplrllvqkr</p> <p><b>Proposed:</b> aliSize=74 (resi) RMSD=2.51 (Å)<br/> OKIVVHLRAtggAPILkqSKFKVSGS-DK--ANVDFLRR--QLHSDSLFVYV---NSAFSPNPDESVIDLYNFGFDGKLVN-yacsmaw<br/> SIVEVKSFK---DAEF--RR--FALPRASVSGQEFsRLRAVHQIpgLDVLLGYTdahgdllpl tnddsLHRALA--SGPPPLRLLVQKR---</p>                          |

|    |               |   |       |                                                                                                                                                                                                                                                                                                                                                                                                                                                                                                                                                                                                                                                                                                                                                                                                                                                                                                                                                                                                                                                                                                     |
|----|---------------|---|-------|-----------------------------------------------------------------------------------------------------------------------------------------------------------------------------------------------------------------------------------------------------------------------------------------------------------------------------------------------------------------------------------------------------------------------------------------------------------------------------------------------------------------------------------------------------------------------------------------------------------------------------------------------------------------------------------------------------------------------------------------------------------------------------------------------------------------------------------------------------------------------------------------------------------------------------------------------------------------------------------------------------------------------------------------------------------------------------------------------------|
| 78 | 1wz3A<br>(84) | C | 11.84 | <p><b>TM-align:</b> aliSize=45 (resi) RMSD=2.43 (Å)<br/> qkIVVHLRAtgGAPILkqSKFKVSGDKFANVIDFLRRQLHSDSLFVYVNSAFSPNPDESVIDLYNFGfdgklvnyacsmaw-----<br/> --SASVLAAP-N-GRR--HTVKYTPSTVLLQVLEDTCCRDFNpSEYDLKfQRT-----vldlslqwrfanlpnnaklemvpsr</p> <p><b>SARST:</b> aliSize=68 (resi) RMSD=12.98 (Å)<br/> qkiv--VHLRATGApilKQSKFKVSGDKFANVIDFLRRQLHSDSLFVYVNSAFSPNPDESVIDLYNFGF--DGKLVVNYA---csmaw<br/> ----saSVLAPNCR---RHTVKYTPSTVLLQVLEDTCCRQDFNpSEYDLKfQRTVLDLSLQ---WRFANLPnnAKLEMVPSr-----</p> <p><b>BLAST:</b> aliSize=14 (resi) iden=13.16% (10/76) simi=18.42% (14/76)<br/> qkivvhlratgg-----ATILKQSKFKVSGDKFANVIDFLRRQLHSDSLFVYVNSAFSPNPDESVIDLYNFGfdgklvnyacsmaw<br/> -----savsvlAENGRRHVTKYTPSTVLLQVLEDTCCRQDFNpSEYDLKfQRTVLDLSLQWRFA--NLP--NNAKLEMVPSr-----</p> <p><b>Proposed:</b> aliSize=69 (resi) RMSD=2.55 (Å)<br/> qkIVVHLRAtgGAPILkqSKFKVSGDKFANVIDFLRRQLHSDSLFVYVNSAFSPNPDESVIDLYNFGfdGKLVVNYAC-----smaw<br/> --SASVLAAP-N-GRR--HTVKYTPSTVLLQVLEDTCCRQDFNpSEYDLKfQRTVLDLSLQWRFA--NLP--NNAKLEMVPSr-----</p>                                                                            |
| 79 | 1wz3A<br>(84) | C | 9.52  | <p><b>TM-align:</b> aliSize=49 (resi) RMSD=2.88 (Å)<br/> -----QKIVVHLRAtgGAPILKQSKFKVSGDKFANVIDFLRRQLHSDSLFVYV-----NSAFSPNPDESVIDLYNFGfdgklvnyacsmaw-----<br/> gssgsSGVMVFIS--SLNSFRSEKRYRSLTIAEFKCKLELVVGPasCMELELYgaddkFYSLDQEDALGsyPDDGCRihvidhsgsgpsg</p> <p><b>SARST:</b> aliSize=58 (resi) RMSD=14.18 (Å)<br/> qkivvhlratggapilkqs-----KFKVSGDKFANVIDFLRRQLHSDSLFVYVNSAFSPNPDESVIDLYNFGFDGKLVVNYAC-----smaw<br/> -----gssgsgvmvfisslnsfrsEKRYRSLTIAEFKCKLELVVGPasCMELELYgaddkfySKLDQEDALGsyPDDGCRihvidhsgsgpsg----</p> <p><b>BLAST:</b> aliSize=8 (resi) iden=5.95% (5/84) simi=9.52% (8/84)<br/> qkivvhlratggapilkqskfkvsgdkfanvidflrrqlhdslyfvyvnsafspnpdesv-----IDLYN-NFGFDGK-----vnyacsmaw<br/> -----gssgsgvmvfisslnsfrsEKRYRSLTIAEFKCKLELVVGPasCMELELYgaddkFYSKLDQEDALGsyPDDGCRihvidhsgsgpsg-----</p> <p><b>Proposed:</b> aliSize=72 (resi) RMSD=2.43 (Å)<br/> -----QKIVVHLRAtgGAPILkqSKFKVSGDKFANVIDFLRRQLHSDSLFVYV-----NSAFSPNPDESVIDLYNFGfdGKLVVNYAC-----smaw<br/> gssgsSGVMVFIS--SLNSFR--SEKRYRSLTIAEFKCKLELVVGPasCMELELYgaddkFYSKLDQEDALGsyPDDGCRihvidhsgsgpsg----</p>              |
| 80 | 1wz3A<br>(84) | C | 9.52  | <p><b>TM-align:</b> aliSize=51 (resi) RMSD=3.15 (Å)<br/> -----QKIVVHLRAtgGAPILkqSKFKVSGDKFANVIDFLRRQLHSDSLFVYVNSAFSPNPDESVIDLYNFGfdgklvnyacs-----MAW-----<br/> gssgsGMELKVWV---DGVQ--RIVCGTEVTTQCEVIAIAQaIGRTGRYTLIEKWR-----D-----terhlapenpiislnkGQYasdvqililrrtgpssg</p> <p><b>SARST:</b> aliSize=62 (resi) RMSD=11.21 (Å)<br/> q-----KIVVHLRAtgGAPILKQSKFKVSGDKFANVIDFLRRQLHSDSLFVYVNS---AFSPNPDESVIDLYNFGfdgklvnyacsmaw<br/> -gssgsGMELKVWVDIVQRIVCGVT---EVTTCQEVIAIAQaIGRTGRYTLIEKWRTERHLAPHENPIISLNkwgqyasdvqililrrtgpssg-----</p> <p><b>BLAST:</b> aliSize=11 (resi) iden=9.52% (8/84) simi=13.10% (11/84)<br/> qkivv-----KIVVHLRAtgGAPILKQSKFKVSGDKFANVIDFLRRQLHSDSLFVYVNSAFSPNPDESVIDLYNFGfdgklvnyacsmaw<br/> -----gssgsgmelkvwvdgvrivcgvtevttcqevvialaqaigrtgrytliekwrTERHLAPHENPIISLNkwgqyasdvqililrrtgpssg-----</p> <p><b>Proposed:</b> aliSize=73 (resi) RMSD=2.71 (Å)<br/> q-----KIVVHLRAtgGAPILkqSKFKVSGDKFANVIDFLRRQLHSDSLFVYVNSAFSPNPDESVIDLYNFGfdGKLVVNYAC-----smaw<br/> -gssgsGMELKVWV---DGVQ--RIVCGTEVTTQCEVIAIAQaIGRTGRYTLIEKWRTERHLAPHENPIISLNkwgqyasdvqililrrtgpssg-----</p> |
|    | 2a3A<br>(76)  |   |       |                                                                                                                                                                                                                                                                                                                                                                                                                                                                                                                                                                                                                                                                                                                                                                                                                                                                                                                                                                                                                                                                                                     |
|    | 1v6eA<br>(95) |   |       |                                                                                                                                                                                                                                                                                                                                                                                                                                                                                                                                                                                                                                                                                                                                                                                                                                                                                                                                                                                                                                                                                                     |
|    | 2cs4A<br>(95) |   |       |                                                                                                                                                                                                                                                                                                                                                                                                                                                                                                                                                                                                                                                                                                                                                                                                                                                                                                                                                                                                                                                                                                     |

|    |                |   |       |                                                                                                                                                                                                                                                                                                                                                                                                                                                                                                                                                                                                                                                                                                                                                                                                                                                                                                                                                                                                                                                                                                                                                                                                                                                                                                                                                                                                                                                                                                                                                                                                                                                                                                                                                                                                                                                                                                                                                                                                                                                                                                                                                                                                                                                                                                                                                                                                                                                                                                                                                                                                                                                                                                                                                                                                                                                                                                                                                                                                                                                                                                                                                                                                                                                                                                                                                                                                                                                                                                                                                                                                                                                                                                                                                                                                                                                                                                                      |
|----|----------------|---|-------|----------------------------------------------------------------------------------------------------------------------------------------------------------------------------------------------------------------------------------------------------------------------------------------------------------------------------------------------------------------------------------------------------------------------------------------------------------------------------------------------------------------------------------------------------------------------------------------------------------------------------------------------------------------------------------------------------------------------------------------------------------------------------------------------------------------------------------------------------------------------------------------------------------------------------------------------------------------------------------------------------------------------------------------------------------------------------------------------------------------------------------------------------------------------------------------------------------------------------------------------------------------------------------------------------------------------------------------------------------------------------------------------------------------------------------------------------------------------------------------------------------------------------------------------------------------------------------------------------------------------------------------------------------------------------------------------------------------------------------------------------------------------------------------------------------------------------------------------------------------------------------------------------------------------------------------------------------------------------------------------------------------------------------------------------------------------------------------------------------------------------------------------------------------------------------------------------------------------------------------------------------------------------------------------------------------------------------------------------------------------------------------------------------------------------------------------------------------------------------------------------------------------------------------------------------------------------------------------------------------------------------------------------------------------------------------------------------------------------------------------------------------------------------------------------------------------------------------------------------------------------------------------------------------------------------------------------------------------------------------------------------------------------------------------------------------------------------------------------------------------------------------------------------------------------------------------------------------------------------------------------------------------------------------------------------------------------------------------------------------------------------------------------------------------------------------------------------------------------------------------------------------------------------------------------------------------------------------------------------------------------------------------------------------------------------------------------------------------------------------------------------------------------------------------------------------------------------------------------------------------------------------------------------------------|
| 81 | 1wz3A<br>(84)  | C | 8.33  | <p><b>TM-align:</b> aliSize=51 (resi) RMSD=2.95 (Å)<br/> -----QKIVHLRATGApILkqSKFKVSGDKFANVIDFLRR--QLH-SDSLFVYVNSAFsnpndesvidlynnfgfdgklvnyacs-----MAW-----<br/> gplgSOVRVKAYYR-<b>G</b>--DI--MITHFEPISIEGLCNEVRDmcSFDnEQLFTMKW<b>I</b>DEE-----gdpc<b>tvssqleleafrlyeLNKdselli hvfpc</b></p> <p><b>SARST:</b> aliSize=70 (resi) RMSD=11.76 (Å)<br/> qk-----IVHLRATGAPILkqskFKVSGDKFANVIDFLRRQLHSLSLFFVYVNSAFsPNPDES-----VIDLYNFGFDGKLVVNY--acsmaw<br/> --gplgsQVRVKAYYR<b>DI</b>MI-----THFEPISIEGLCNEVRDmCSFDnEQLFTMKW--<b>I</b>DEEGD<b>pc</b>tvssqlelea<b>AFRLYELNKDSEL</b>LHV<b>F</b>pc-----</p> <p><b>BLAST:</b> aliSize=0 (resi) iden=0.00% (0/84) simi=0.00% (0/84)<br/> qkivvhlratggapilkqskfkvsgdkfanvidflrrqlhsdlsfvyvnsafsnpndesvidlynnfgfdgklvnyacsma-----<br/> -----gplgsqvrvkayyrgdimithfepsisfeqlcnevrdmcsfdneqlftmkw<b>ideegdpc</b>tvssqleleafrlyelnkdselli hvfpc</p> <p><b>Proposed:</b> aliSize=73 (resi) RMSD=2.54 (Å)<br/> -----QKIVHLRATGApI-lkqSKFKVSGDKFANVIDFLRR--QLH-SDSLFVYV<b>N</b>---SAFSPNPDESVIDLYNfG--F-DGKLVVNYAC-smaw<br/> gplgSOVRVKAYYR-<b>G</b>--Di---MITHFEPISIEGLCNEVRDmcSFDnEQLFTMKW<b>I</b>deeg<b>D</b>PCTVSSQLELEEA<b>FRL</b>-YeINk<b>SE</b>L<b>L</b>H<b>V</b>FPc-----</p>                                                                                                                                                                                                                                                                                                                                                                                                                                                                                                                                                                                                                                                                                                                                                                                                                                                                                                                                                                                                                                                                                                                                                                                                                                                                                                                                                                                                                                                                                                                                                                                                                                                                                                                                                                                                                                                                                                                                                                                                                                                                                                                                                                                                                                                                                                                                                                                                                                                                                                                                                                                                                                                                                                    |
| 82 | 1zvnA<br>(99)  | N | 28.28 | <p><b>TM-align:</b> aliSize=93 (resi) RMSD=2.22 (Å)<br/> sgwv-----WNQ<b>F</b>VLE<b>E</b>Y<b>T</b>TD<b>L</b>Y<b>V</b>G<b>K</b>L<b>H</b>S<b>D</b>M<b>R</b>G<b>D</b>G<b>S</b>I<b>K</b>I<b>L</b>S<b>E</b>G<b>A</b>-----G<b>I</b>V<b>T</b>I<b>D</b>D<b>T</b>I<b>G</b>D<b>I</b>H<b>A</b>I<b>O</b>R<b>L</b>D<b>R</b>E<b>R</b>S<b>O</b>Y<b>T</b>I<b>R</b>A<b>O</b>A<b>L</b>D<b>r</b>R<b>T</b>C<b>R</b>P<b>M</b>E<b>P</b>E<b>S</b>E<b>F</b>I<b>K</b>I<b>O</b><br/> ----gplgswv<b>I</b>P<b>P</b>I<b>S</b>C<b>P</b>E<b>N</b>E<b>K</b>E<b>F</b>F<b>K</b>N<b>L</b>V<b>O</b>I<b>K</b>S<b>N</b>R<b>K</b>E<b>T</b>-<b>K</b>V<b>F</b>I<b>S</b>I<b>T</b>O<b>G</b>A<b>d</b>k<b>p</b>p<b>V</b>G<b>V</b>I<b>E</b>R<b>E</b>T<b>G</b>W<b>L</b>K<b>V</b>T<b>O</b>P<b>L</b>D<b>R</b>E<b>A</b>I<b>A</b>K<b>I</b>I<b>Y</b>S<b>H</b>A<b>V</b>S<b>-</b>S<b>N</b>G<b>N</b>A<b>V</b>E<b>D</b>P<b>M</b>E<b>I</b>V<b>I</b>T<b>V</b>T<b>D</b></p> <p><b>SARST:</b> aliSize=94 (resi) RMSD=3.51 (Å)<br/> s-----G<b>V</b>W<b>N</b>O<b>F</b>V<b>L</b>E<b>E</b>Y<b>T</b>TD<b>L</b>Y<b>V</b>G<b>K</b>L<b>H</b>S<b>D</b>M<b>R</b>G<b>D</b>G<b>S</b>I<b>K</b>I<b>L</b>S<b>E</b>G<b>A</b>-----A<b>G</b>i<b>V</b>T<b>I</b>D<b>D</b>T<b>I</b>G<b>D</b>I<b>H</b>A<b>I</b>O<b>R</b>L<b>D</b>R<b>E</b>R<b>S</b>O<b>Y</b>T<b>I</b>R<b>A</b>O<b>A</b>L<b>D</b>r<b>R</b>T<b>C</b>R<b>P</b>M<b>E</b>P<b>E</b>S<b>E</b>F<b>I</b>K<b>I</b>O<b>-</b>d<br/> -gplg<b>S</b>W<b>V</b>I<b>P</b>I<b>S</b>C<b>P</b>E<b>N</b>E<b>K</b>E<b>F</b>F<b>K</b>N<b>L</b>V<b>O</b>I<b>K</b>S<b>N</b>R<b>-</b>D<b>K</b>E<b>T</b><b>K</b>V<b>F</b>I<b>S</b>I<b>T</b>O<b>G</b>A<b>d</b>k<b>p</b>p<b>V</b>G<b>-</b>V<b>I</b>E<b>R</b>E<b>T</b><b>G</b>W<b>L</b>K<b>V</b>T<b>O</b>P<b>L</b>D<b>R</b>E<b>A</b>I<b>A</b>K<b>I</b>I<b>Y</b>S<b>H</b>A<b>V</b>S<b>-</b>S<b>N</b>G<b>N</b>A<b>V</b>E<b>D</b>P<b>M</b>E<b>I</b>V<b>I</b>T<b>V</b>T<b>D</b></p> <p><b>BLAST:</b> aliSize=48 (resi) iden=29.29% (29/99) simi=48.48% (48/99)<br/> sg-----W<b>N</b>O<b>F</b>V<b>L</b>E<b>E</b>Y<b>T</b>TD<b>L</b>Y<b>V</b>G<b>K</b>L<b>H</b>S<b>D</b>M<b>R</b>G<b>D</b>G<b>S</b>I<b>K</b>I<b>L</b>S<b>E</b>G<b>A</b>-----G<b>I</b>V<b>T</b>I<b>D</b>D<b>T</b>I<b>G</b>D<b>I</b>H<b>A</b>I<b>O</b>R<b>L</b>D<b>R</b>E<b>R</b>S<b>O</b>Y<b>T</b>I<b>R</b>A<b>O</b>A<b>L</b>D<b>r</b>R<b>T</b>C<b>R</b>P<b>M</b>E<b>P</b>E<b>S</b>E<b>F</b>I<b>K</b>I<b>O</b><br/> --gplgs<b>W</b>V<b>I</b>P<b>P</b>I<b>S</b>C<b>P</b>E<b>N</b>E<b>K</b>E<b>F</b>F<b>K</b>N<b>L</b>V<b>O</b>I<b>K</b>S<b>N</b>R<b>K</b>-<b>E</b>T<b>K</b>V<b>F</b>I<b>S</b>I<b>T</b>O<b>G</b>A<b>d</b>k<b>p</b>p<b>v</b>G<b>V</b>I<b>E</b>R<b>E</b>T<b>G</b>W<b>L</b>K<b>V</b>T<b>O</b>P<b>L</b>D<b>R</b>E<b>A</b>I<b>A</b>K<b>I</b>I<b>Y</b>S<b>H</b>A<b>V</b>S<b>-</b>S<b>N</b>G<b>N</b>A<b>V</b>E<b>D</b>P<b>M</b>E<b>I</b>V<b>I</b>T<b>V</b>T<b>D</b></p> <p><b>Proposed:</b> aliSize=95 (resi) RMSD=1.64 (Å)<br/> -S-G<b>V</b>W<b>N</b>O<b>-</b><b>F</b>V<b>L</b>E<b>E</b>Y<b>T</b>TD<b>L</b>Y<b>V</b>G<b>K</b>L<b>H</b>S<b>D</b>M<b>R</b>--g<b>d</b>G<b>S</b>I<b>K</b>I<b>L</b>S<b>E</b>G<b>A</b>-----G<b>I</b>V<b>T</b>I<b>D</b>D<b>T</b>I<b>G</b>D<b>I</b>H<b>A</b>I<b>O</b>R<b>L</b>D<b>R</b>E<b>R</b>S<b>O</b>Y<b>T</b>I<b>R</b>A<b>O</b>A<b>L</b>D<b>r</b>R<b>T</b>C<b>R</b>P<b>M</b>E<b>P</b>E<b>S</b>E<b>F</b>I<b>K</b>I<b>O</b>-<br/> g<b>P</b>I<b>S</b>W<b>V</b>I<b>P</b>I<b>S</b>C<b>P</b>E<b>N</b>E<b>K</b>E<b>F</b>F<b>K</b>N<b>L</b>V<b>O</b>I<b>K</b>S<b>N</b>R<b>K</b>e<b>t</b>--<b>K</b>V<b>F</b>I<b>S</b>I<b>T</b>O<b>G</b>A<b>d</b>k<b>p</b>p<b>v</b>G<b>V</b>I<b>E</b>R<b>E</b>T<b>G</b>W<b>L</b>K<b>V</b>T<b>O</b>P<b>L</b>D<b>R</b>E<b>A</b>I<b>A</b>K<b>I</b>I<b>Y</b>S<b>H</b>A<b>V</b>S<b>-</b>S<b>N</b>G<b>N</b>A<b>V</b>E<b>D</b>P<b>M</b>E<b>I</b>V<b>I</b>T<b>V</b>T<b>D</b>a</p>                                                                                                                          |
| 83 | 2oyaA<br>(102) | N | 97.96 | <p><b>TM-align:</b> aliSize=90 (resi) RMSD=0.71 (Å)<br/> aplaqrvrimgg-----<b>T</b>N<b>R</b>G<b>R</b>A<b>E</b>V<b>Y</b>N<b>N</b>E<b>W</b>G<b>T</b>I<b>C</b>D<b>D</b>D<b>W</b>D<b>N</b>D<b>A</b>T<b>V</b>F<b>C</b>R<b>M</b>L<b>G</b>Y<b>S</b>R<b>G</b>R<b>A</b>L<b>S</b>S<b>Y</b>G<b>G</b>G<b>S</b>G<b>N</b>I<b>W</b>L<b>D</b>N<b>V</b>N<b>C</b>R<b>G</b>T<b>E</b>N<b>S</b>L<b>W</b>D<b>C</b>S<b>K</b>N<b>S</b>W<b>G</b>N<b>H</b>N<b>C</b>V<b>H</b>N<b>E</b>D<b>A</b>G<b>V</b>E<b>C</b>S<br/> -----q<b>r</b>v<b>r</b>i<b>m</b>g<b>g</b><b>T</b>N<b>R</b>G<b>R</b>A<b>E</b>V<b>Y</b>N<b>N</b>E<b>W</b>G<b>T</b>I<b>C</b>D<b>D</b>D<b>W</b>D<b>N</b>D<b>A</b>T<b>V</b>F<b>C</b>R<b>M</b>L<b>G</b>Y<b>S</b>R<b>G</b>R<b>A</b>L<b>S</b>S<b>Y</b>G<b>G</b>G<b>S</b>G<b>N</b>I<b>W</b>L<b>D</b>N<b>V</b>N<b>C</b>R<b>G</b>T<b>E</b>N<b>S</b>L<b>W</b>D<b>C</b>S<b>K</b>N<b>S</b>W<b>G</b>N<b>H</b>N<b>C</b>V<b>H</b>N<b>E</b>D<b>A</b>G<b>V</b>E<b>C</b>S</p> <p><b>SARST:</b> aliSize=95 (resi) RMSD=4.01 (Å)<br/> aplaqr--<b>V</b>R<b>I</b>M<b>G</b>G<b>T</b>N<b>R</b>G<b>R</b>A<b>E</b>V<b>Y</b>N<b>N</b>E<b>W</b>G<b>T</b>I<b>C</b>D<b>D</b>D<b>W</b>D<b>N</b>D<b>A</b>T<b>V</b>F<b>C</b>R<b>M</b>L<b>G</b>Y<b>S</b>R<b>G</b>R<b>A</b>L<b>S</b>S<b>Y</b>G<b>G</b>G<b>S</b>G<b>N</b>I<b>W</b>L<b>D</b>N<b>V</b>N<b>C</b>R<b>G</b>T<b>E</b>N<b>S</b>L<b>W</b>D<b>C</b>S<b>K</b>N<b>S</b>W<b>G</b>N<b>H</b>N<b>C</b>V<b>H</b>N<b>E</b>D<b>A</b>G<b>V</b>E<b>C</b>-s<br/> -----q<b>r</b><b>V</b>R<b>I</b>M<b>G</b>G<b>T</b>N<b>R</b>G<b>R</b>A<b>E</b>V<b>Y</b>N<b>N</b>E<b>W</b>G<b>T</b>I<b>C</b>D<b>D</b>D<b>W</b>D<b>N</b>D<b>A</b>T<b>V</b>F<b>C</b>R<b>M</b>L<b>G</b>Y<b>S</b>R<b>G</b>R<b>A</b>L<b>S</b>S<b>Y</b>G<b>G</b>G<b>S</b>G<b>N</b>I<b>W</b>L<b>D</b>N<b>V</b>N<b>C</b>R<b>G</b>T<b>E</b>N<b>S</b>L<b>W</b>D<b>C</b>S<b>K</b>N<b>S</b>W<b>G</b>N<b>H</b>N<b>C</b>V<b>H</b>N<b>E</b>D<b>A</b>G<b>V</b>E<b>C</b>s-</p> <p><b>BLAST:</b> aliSize=98 (resi) iden=100.00% (98/98) simi=100.00% (98/98)<br/> apla<b>Q</b>R<b>V</b>R<b>I</b>M<b>G</b>G<b>T</b>N<b>R</b>G<b>R</b>A<b>E</b>V<b>Y</b>N<b>N</b>E<b>W</b>G<b>T</b>I<b>C</b>D<b>D</b>D<b>W</b>D<b>N</b>D<b>A</b>T<b>V</b>F<b>C</b>R<b>M</b>L<b>G</b>Y<b>S</b>R<b>G</b>R<b>A</b>L<b>S</b>S<b>Y</b>G<b>G</b>G<b>S</b>G<b>N</b>I<b>W</b>L<b>D</b>N<b>V</b>N<b>C</b>R<b>G</b>T<b>E</b>N<b>S</b>L<b>W</b>D<b>C</b>S<b>K</b>N<b>S</b>W<b>G</b>N<b>H</b>N<b>C</b>V<b>H</b>N<b>E</b>D<b>A</b>G<b>V</b>E<b>C</b>S<br/> ----<b>Q</b>R<b>V</b>R<b>I</b>M<b>G</b>G<b>T</b>N<b>R</b>G<b>R</b>A<b>E</b>V<b>Y</b>N<b>N</b>E<b>W</b>G<b>T</b>I<b>C</b>D<b>D</b>D<b>W</b>D<b>N</b>D<b>A</b>T<b>V</b>F<b>C</b>R<b>M</b>L<b>G</b>Y<b>S</b>R<b>G</b>R<b>A</b>L<b>S</b>S<b>Y</b>G<b>G</b>G<b>S</b>G<b>N</b>I<b>W</b>L<b>D</b>N<b>V</b>N<b>C</b>R<b>G</b>T<b>E</b>N<b>S</b>L<b>W</b>D<b>C</b>S<b>K</b>N<b>S</b>W<b>G</b>N<b>H</b>N<b>C</b>V<b>H</b>N<b>E</b>D<b>A</b>G<b>V</b>E<b>C</b>S</p> <p><b>Proposed:</b> aliSize=98 (resi) RMSD=0.45 (Å)<br/> apLa<b>Q</b>r<b>V</b>R<b>I</b>M<b>G</b>G<b>T</b>N<b>R</b>G<b>R</b>A<b>E</b>V<b>Y</b>N<b>N</b>E<b>W</b>G<b>T</b>I<b>C</b>D<b>D</b>D<b>W</b>D<b>N</b>D<b>A</b>T<b>V</b>F<b>C</b>R<b>M</b>L<b>G</b>Y<b>S</b>R<b>G</b>R<b>A</b>L<b>S</b>S<b>Y</b>G<b>G</b>G<b>S</b>G<b>N</b>I<b>W</b>L<b>D</b>N<b>V</b>N<b>C</b>R<b>G</b>T<b>E</b>N<b>S</b>L<b>W</b>D<b>C</b>S<b>K</b>N<b>S</b>W<b>G</b>N<b>H</b>N<b>C</b>V<b>H</b>N<b>E</b>D<b>A</b>G<b>V</b>E<b>C</b>S<br/> --<b>Q</b>-<b>R</b>-<b>V</b>R<b>I</b>M<b>G</b>G<b>T</b>N<b>R</b>G<b>R</b>A<b>E</b>V<b>Y</b>N<b>N</b>E<b>W</b>G<b>T</b>I<b>C</b>D<b>D</b>D<b>W</b>D<b>N</b>D<b>A</b>T<b>V</b>F<b>C</b>R<b>M</b>L<b>G</b>Y<b>S</b>R<b>G</b>R<b>A</b>L<b>S</b>S<b>Y</b>G<b>G</b>G<b>S</b>G<b>N</b>I<b>W</b>L<b>D</b>N<b>V</b>N<b>C</b>R<b>G</b>T<b>E</b>N<b>S</b>L<b>W</b>D<b>C</b>S<b>K</b>N<b>S</b>W<b>G</b>N<b>H</b>N<b>C</b>V<b>H</b>N<b>E</b>D<b>A</b>G<b>V</b>E<b>C</b>S</p> |
|    | 2oy3A<br>(98)  |   |       |                                                                                                                                                                                                                                                                                                                                                                                                                                                                                                                                                                                                                                                                                                                                                                                                                                                                                                                                                                                                                                                                                                                                                                                                                                                                                                                                                                                                                                                                                                                                                                                                                                                                                                                                                                                                                                                                                                                                                                                                                                                                                                                                                                                                                                                                                                                                                                                                                                                                                                                                                                                                                                                                                                                                                                                                                                                                                                                                                                                                                                                                                                                                                                                                                                                                                                                                                                                                                                                                                                                                                                                                                                                                                                                                                                                                                                                                                                                      |

|    |                                               |   |       |                                                                                                                                                                                                                                                                                                                                                                                                                                                                                                                                                                                                                                                                                                                                                                                                                                                                                                                                                                                                                                                                                                                                                                                                                                                                                                                                                                                                                                                                                                                                                                                                                                                                                                                                                                                                                                                                                                                                                                                                                                                                                                                                                                                                                                                                                                                                                                                                                                                                                                                                                                                                                                                                                                                                                                                                                                                                                                                                                                                                                                                                                                                                                                                                                                                                                                                                                                                                                                                                                                                                                                                                                                                                                                                                                                                                                                                                                                                                                                                                                                                                                                                                                                                                                                                                                                                                                                                                                                                                                                                                                                                                                                                                                                                                                                                                                                                                                                                                                                                                                                                                                                                                                                                                                                                                                                                                                                                                                                                                                                                                                                                                                                                                                                                                                                                                                                                                                                                                                                                                                                                                                                                                                                                                                                                                                                                                                                                                  |
|----|-----------------------------------------------|---|-------|--------------------------------------------------------------------------------------------------------------------------------------------------------------------------------------------------------------------------------------------------------------------------------------------------------------------------------------------------------------------------------------------------------------------------------------------------------------------------------------------------------------------------------------------------------------------------------------------------------------------------------------------------------------------------------------------------------------------------------------------------------------------------------------------------------------------------------------------------------------------------------------------------------------------------------------------------------------------------------------------------------------------------------------------------------------------------------------------------------------------------------------------------------------------------------------------------------------------------------------------------------------------------------------------------------------------------------------------------------------------------------------------------------------------------------------------------------------------------------------------------------------------------------------------------------------------------------------------------------------------------------------------------------------------------------------------------------------------------------------------------------------------------------------------------------------------------------------------------------------------------------------------------------------------------------------------------------------------------------------------------------------------------------------------------------------------------------------------------------------------------------------------------------------------------------------------------------------------------------------------------------------------------------------------------------------------------------------------------------------------------------------------------------------------------------------------------------------------------------------------------------------------------------------------------------------------------------------------------------------------------------------------------------------------------------------------------------------------------------------------------------------------------------------------------------------------------------------------------------------------------------------------------------------------------------------------------------------------------------------------------------------------------------------------------------------------------------------------------------------------------------------------------------------------------------------------------------------------------------------------------------------------------------------------------------------------------------------------------------------------------------------------------------------------------------------------------------------------------------------------------------------------------------------------------------------------------------------------------------------------------------------------------------------------------------------------------------------------------------------------------------------------------------------------------------------------------------------------------------------------------------------------------------------------------------------------------------------------------------------------------------------------------------------------------------------------------------------------------------------------------------------------------------------------------------------------------------------------------------------------------------------------------------------------------------------------------------------------------------------------------------------------------------------------------------------------------------------------------------------------------------------------------------------------------------------------------------------------------------------------------------------------------------------------------------------------------------------------------------------------------------------------------------------------------------------------------------------------------------------------------------------------------------------------------------------------------------------------------------------------------------------------------------------------------------------------------------------------------------------------------------------------------------------------------------------------------------------------------------------------------------------------------------------------------------------------------------------------------------------------------------------------------------------------------------------------------------------------------------------------------------------------------------------------------------------------------------------------------------------------------------------------------------------------------------------------------------------------------------------------------------------------------------------------------------------------------------------------------------------------------------------------------------------------------------------------------------------------------------------------------------------------------------------------------------------------------------------------------------------------------------------------------------------------------------------------------------------------------------------------------------------------------------------------------------------------------------------------------------------------------------------------------|
| 84 | <p>2oyaA<br/>(102)</p> <p>1by2A<br/>(112)</p> | N | 47.06 | <p><b>TM-align:</b> aliSize=91 (resi) RMSD=1.47 (Å)<br/> aplaqrvring-----G<sup>T</sup>NRGRAEVYNNENGTICDDDDWNNDATVFCRMLGYSRG-RALSS-Y-<sup>G</sup>GGSCN<sup>W</sup>L<sup>D</sup>N<sup>V</sup>N<sup>R</sup>RTENS<sup>L</sup>W<sup>D</sup>C<sup>S</sup>SKNS<sup>W</sup>GNH<sup>N</sup>CV<sup>H</sup>NE<sup>D</sup>AG<sup>V</sup>ES-----<br/> -----avndgdmrladggATN<sup>O</sup>GR<sup>V</sup>E<sup>I</sup>F<sup>R</sup>G<sup>Q</sup>W<sup>G</sup>T<sup>V</sup>C<sup>D</sup>N<sup>L</sup>W<sup>D</sup>L<sup>T</sup>D<sup>A</sup>S<sup>V</sup>VC<sup>R</sup>A<sup>L</sup>G<sup>F</sup>EN<sup>A</sup>t<sup>O</sup>AL<sup>G</sup>R<sup>A</sup>a<sup>F</sup><sup>O</sup>GS<sup>G</sup>P<sup>I</sup>M<sup>L</sup>DE<sup>V</sup>O<sup>C</sup>T<sup>G</sup>TE<sup>A</sup>SL<sup>A</sup>D<sup>C</sup>K<sup>S</sup>L<sup>G</sup>W<sup>L</sup>K<sup>S</sup>N<sup>C</sup>R<sup>H</sup>ER<sup>D</sup>AG<sup>V</sup>CT<sup>N</sup>et<sup>t</sup>l</p> <p><b>SARST:</b> aliSize=94 (resi) RMSD=4.15 (Å)<br/> aplaqr-----VR<sup>I</sup>M<sup>G</sup>--G<sup>T</sup>NRGRAEVYNNENGTICDDDDWNNDATVFCRMLGYSRG-RALSS--Y<sup>G</sup>GGSCN<sup>W</sup>L<sup>D</sup>N<sup>V</sup>N<sup>R</sup>RTENS<sup>L</sup>W<sup>D</sup>C<sup>S</sup>SKNS<sup>W</sup>GNH<sup>N</sup>CV<sup>H</sup>NE<sup>D</sup>AG<sup>V</sup>E-----cs<br/> -----avndgM<sup>R</sup>L<sup>A</sup>D<sup>G</sup>g<sup>A</sup>T<sup>N</sup><sup>O</sup>GR<sup>V</sup>E<sup>I</sup>F<sup>R</sup>G<sup>Q</sup>W<sup>G</sup>T<sup>V</sup>C<sup>D</sup>N<sup>L</sup>W<sup>D</sup>L<sup>T</sup>D<sup>A</sup>S<sup>V</sup>VC<sup>R</sup>A<sup>L</sup>G<sup>F</sup>EN<sup>A</sup>t<sup>O</sup>AL<sup>G</sup>R<sup>A</sup>a<sup>F</sup><sup>O</sup>GS<sup>G</sup>P<sup>I</sup>M<sup>L</sup>DE<sup>V</sup>O<sup>C</sup>T<sup>G</sup>TE<sup>A</sup>SL<sup>A</sup>D<sup>C</sup>K<sup>S</sup>L<sup>G</sup>W<sup>L</sup>K<sup>S</sup>N<sup>C</sup>R<sup>H</sup>ER<sup>D</sup>AG<sup>V</sup>C<sup>T</sup>net<sup>t</sup>l--</p> <p><b>BLAST:</b> aliSize=61 (resi) iden=47.06% (48/102) simi=59.80% (61/102)<br/> aplaqrvrim-----G<sup>T</sup>NRGRAEVYNNENGTICDDDDWNNDATVFCRMLGYSRG-RAL--SS<sup>Y</sup><sup>G</sup>GGSCN<sup>W</sup>L<sup>D</sup>N<sup>V</sup>N<sup>R</sup>RTENS<sup>L</sup>W<sup>D</sup>C<sup>S</sup>SKNS<sup>W</sup>GNH<sup>N</sup>CV<sup>H</sup>NE<sup>D</sup>AG<sup>V</sup>ES-----<br/> -----avndgdmrladggATN<sup>O</sup>GR<sup>V</sup>E<sup>I</sup>F<sup>R</sup>G<sup>Q</sup>W<sup>G</sup>T<sup>V</sup>C<sup>D</sup>N<sup>L</sup>W<sup>D</sup>L<sup>T</sup>D<sup>A</sup>S<sup>V</sup>VC<sup>R</sup>A<sup>L</sup>G<sup>F</sup>EN<sup>A</sup>t<sup>O</sup>AL<sup>G</sup>r<sup>A</sup>a<sup>F</sup><sup>O</sup>GS<sup>G</sup>P<sup>I</sup>M<sup>L</sup>DE<sup>V</sup>O<sup>C</sup>T<sup>G</sup>TE<sup>A</sup>SL<sup>A</sup>D<sup>C</sup>K<sup>S</sup>L<sup>G</sup>W<sup>L</sup>K<sup>S</sup>N<sup>C</sup>R<sup>H</sup>ER<sup>D</sup>AG<sup>V</sup>CT<sup>N</sup>et<sup>t</sup>l</p> <p><b>Proposed:</b> aliSize=101 (resi) RMSD=1.18 (Å)<br/> -A<sup>P</sup>L<sup>A</sup>Q<sup>r</sup>V<sup>R</sup>I<sup>M</sup>G<sup>G</sup>-<sup>T</sup>-N<sup>R</sup>G<sup>R</sup>A<sup>E</sup>V<sup>Y</sup>N<sup>N</sup>E<sup>N</sup>G<sup>T</sup>I<sup>C</sup>D<sup>D</sup>D<sup>W</sup>N<sup>N</sup>D<sup>A</sup>T<sup>V</sup>F<sup>C</sup>R<sup>M</sup>L<sup>G</sup>Y<sup>S</sup>R<sup>G</sup>-R<sup>A</sup>L<sup>S</sup>S<sup>Y</sup>--<sup>G</sup>GGSCN<sup>W</sup>L<sup>D</sup>N<sup>V</sup>N<sup>R</sup>RTENS<sup>L</sup>W<sup>D</sup>C<sup>S</sup>SKNS<sup>W</sup>GNH<sup>N</sup>CV<sup>H</sup>NE<sup>D</sup>AG<sup>V</sup>ES-----<br/> a<sup>V</sup>N<sup>D</sup>G<sup>D</sup>-M<sup>R</sup>L<sup>A</sup>D<sup>G</sup>g<sup>A</sup>T<sup>N</sup><sup>O</sup>GR<sup>V</sup>E<sup>I</sup>F<sup>R</sup>G<sup>Q</sup>W<sup>G</sup>T<sup>V</sup>C<sup>D</sup>N<sup>L</sup>W<sup>D</sup>L<sup>T</sup>D<sup>A</sup>S<sup>V</sup>VC<sup>R</sup>A<sup>L</sup>G<sup>F</sup>EN<sup>A</sup>t<sup>O</sup>AL<sup>G</sup>R<sup>A</sup>a<sup>F</sup><sup>O</sup>GS<sup>G</sup>P<sup>I</sup>M<sup>L</sup>DE<sup>V</sup>O<sup>C</sup>T<sup>G</sup>TE<sup>A</sup>SL<sup>A</sup>D<sup>C</sup>K<sup>S</sup>L<sup>G</sup>W<sup>L</sup>K<sup>S</sup>N<sup>C</sup>R<sup>H</sup>ER<sup>D</sup>AG<sup>V</sup>CT<sup>N</sup>et<sup>t</sup>l</p>                                                                                                                                                                                                                                                                                                                                                                                                                                                                                                                                                                                                                                                                                                                                                                                                                                                                                                                                                                                                                                                                                                                                                                                                                                                                                                                                                                                                                                                                                                                                                                                                                                                                                                                                                                                                                                                                                                                                                                                                                                                                                                                                          |
| 85 | <p>1v9yA<br/>(103)</p> <p>2pd7A<br/>(149)</p> | N | 15.53 | <p><b>TM-align:</b> aliSize=97 (resi) RMSD=2.97 (Å)<br/> -----G<sup>I</sup>FF<sup>p</sup>-----A<sup>L</sup>eq<sup>N</sup>m<sup>M</sup>G<sup>A</sup>V<sup>I</sup>INE--N--DE<sup>V</sup>M<sup>F</sup>F<sup>N</sup>P<sup>A</sup>E<sup>K</sup>L<sup>W</sup>G<sup>Y</sup>K<sup>R</sup>E<sup>E</sup>V<sup>I</sup>G<sup>N</sup>N<sup>I</sup>D<sup>M</sup>i<sup>P</sup>R---D<sup>L</sup>R--P-----A--H<sup>P</sup>E<sup>Y</sup>I<sup>r</sup>H<sup>N</sup>-R<sup>E</sup>-----R<sup>E</sup>L<sup>Q</sup>L<sup>E</sup>K<sup>K</sup>D<sup>G</sup>S<sup>K</sup>I<sup>W</sup>T<sup>R</sup>F<sup>A</sup>L<sup>S</sup>K<sup>V</sup>S<sup>A</sup>E<sup>G</sup>K<sup>V</sup>Y<sup>L</sup>A<sup>L</sup>V<sup>R</sup>D<br/> mhtlyapgyD<sup>I</sup>M<sup>G</sup>-y<sup>l</sup>i<sup>q</sup>imn<sup>r</sup>p<sup>n</sup>p<sup>q</sup>v<sup>e</sup>l<sup>g</sup>p<sup>v</sup>D<sup>T</sup>--S-C<sup>A</sup>L<sup>I</sup>I<sup>C</sup>D<sup>L</sup>k<sup>Q</sup>k<sup>d</sup>T<sup>P</sup>I<sup>V</sup>Y<sup>A</sup>S<sup>E</sup>F<sup>L</sup>Y<sup>M</sup>T<sup>G</sup>S<sup>N</sup>A<sup>E</sup>V<sup>L</sup>G<sup>R</sup>N<sup>C</sup>R<sup>F</sup>L-Q<sup>S</sup>p<sup>d</sup>g<sup>M</sup>V<sup>K</sup>p<sup>k</sup>S<sup>t</sup>r<sup>k</sup>y<sup>v</sup>d<sup>S</sup>n<sup>t</sup>I<sup>N</sup>T<sup>M</sup>R<sup>K</sup>A<sup>I</sup>D<sup>R</sup>naev<sup>q</sup>V<sup>E</sup>V<sup>N</sup>F<sup>K</sup>N<sup>G</sup>Q<sup>R</sup>F<sup>V</sup>N<sup>F</sup>L<sup>T</sup>M<sup>I</sup>P<sup>V</sup>R<sup>D</sup>e<sup>T</sup>g<sup>E</sup>Y<sup>R</sup>S<sup>M</sup>G<sup>F</sup>Q<sup>C</sup>E</p> <p><b>SARST:</b> aliSize=92 (resi) RMSD=4.38 (Å)<br/> giffpaleq<sup>n</sup>-----MM<sup>G</sup>A<sup>V</sup>I<sup>I</sup>N<sup>E</sup>N--DE<sup>V</sup>M<sup>F</sup>F<sup>N</sup>P<sup>A</sup>E<sup>K</sup>L<sup>W</sup>G<sup>Y</sup>K<sup>R</sup>E<sup>E</sup>V<sup>I</sup>G<sup>N</sup>N<sup>I</sup>D<sup>M</sup>i<sup>P</sup>R<sup>L</sup>-----R<sup>P</sup>A<sup>H</sup>P<sup>E</sup>Y<sup>I</sup>R<sup>H</sup>N<sup>R</sup>E<sup>R</sup>E-----L<sup>Q</sup>L<sup>E</sup>K<sup>K</sup>D<sup>G</sup>S<sup>K</sup>I<sup>W</sup>T<sup>R</sup>F<sup>A</sup>L<sup>S</sup>K<sup>V</sup>S<sup>A</sup>E<sup>G</sup>K<sup>V</sup>Y<sup>L</sup>A<sup>L</sup>V<sup>R</sup>--d<br/> -----mhtlyapgydim<sup>y</sup>l<sup>i</sup>q<sup>i</sup>imn<sup>r</sup>p<sup>n</sup>p<sup>q</sup>v<sup>e</sup>l<sup>g</sup>p<sup>v</sup>D<sup>T</sup>SC<sup>A</sup>L<sup>I</sup>I<sup>C</sup>D<sup>L</sup>k<sup>Q</sup>k<sup>d</sup>T<sup>P</sup>I<sup>V</sup>Y<sup>A</sup>S<sup>E</sup>F<sup>L</sup>Y<sup>M</sup>T<sup>G</sup>S<sup>N</sup>A<sup>E</sup>V<sup>L</sup>G<sup>R</sup>N<sup>C</sup>R<sup>F</sup>LQ<sup>S</sup>P<sup>D</sup>G<sup>M</sup>v<sup>k</sup>p<sup>k</sup>s<sup>t</sup>r<sup>k</sup>y<sup>v</sup>d<sup>S</sup>n<sup>t</sup>I<sup>N</sup>T<sup>M</sup>R<sup>K</sup>A<sup>I</sup>D<sup>R</sup>naev<sup>q</sup>V<sup>E</sup>V<sup>N</sup>F<sup>K</sup>N<sup>G</sup>Q<sup>R</sup>F<sup>V</sup>N<sup>F</sup>L<sup>T</sup>M<sup>I</sup>P<sup>V</sup>R<sup>D</sup>e<sup>T</sup>g<sup>E</sup>Y<sup>R</sup>S<sup>M</sup>G<sup>F</sup>Q<sup>C</sup>e-</p> <p><b>BLAST:</b> aliSize=41 (resi) iden=18.45% (19/103) simi=39.81% (41/103)<br/> giffpaleq<sup>n</sup>m<sup>m</sup>g<sup>a</sup>v<sup>l</sup>-----I<sup>N</sup>E<sup>N</sup>E--V<sup>M</sup>F<sup>F</sup>N<sup>P</sup><sup>A</sup>E<sup>K</sup>L<sup>W</sup>G<sup>Y</sup>K<sup>R</sup>E<sup>E</sup>V<sup>I</sup>G<sup>N</sup>N<sup>I</sup>D<sup>M</sup>i<sup>P</sup>R<sup>L</sup>---L<sup>R</sup>P--A<sup>H</sup>P<sup>E</sup>Y<sup>I</sup>R<sup>H</sup>N<sup>R</sup>E<sup>R</sup>E<sup>R</sup>L<sup>Q</sup>L<sup>E</sup>K<sup>K</sup>D<sup>G</sup>S<sup>K</sup>I<sup>W</sup>T<sup>R</sup>F<sup>A</sup>L<sup>S</sup>K<sup>V</sup>S<sup>A</sup>E<sup>G</sup>K<sup>V</sup>Y<sup>L</sup>A<sup>L</sup>--V<sup>R</sup>D-----<br/> -----mhtlyapgydim<sup>y</sup>l<sup>i</sup>q<sup>i</sup>imn<sup>r</sup>p<sup>n</sup>p<sup>q</sup>v<sup>e</sup>l<sup>g</sup>p<sup>v</sup>D<sup>T</sup>sc<sup>a</sup>l<sup>i</sup>l<sup>e</sup>d<sup>L</sup>K<sup>Q</sup>K<sup>T</sup>p<sup>I</sup>V<sup>Y</sup>A<sup>S</sup>E<sup>F</sup>L<sup>Y</sup>M<sup>T</sup>G<sup>S</sup>N<sup>A</sup>E<sup>V</sup>L<sup>G</sup>R<sup>N</sup>C<sup>R</sup>F<sup>L</sup>Q<sup>S</sup>P<sup>D</sup>G<sup>M</sup>V<sup>K</sup>p<sup>k</sup>S<sup>T</sup>R<sup>K</sup>I<sup>V</sup>D<sup>S</sup>T<sup>I</sup>N<sup>T</sup>M<sup>R</sup>K<sup>A</sup>I<sup>D</sup>R<sup>N</sup>A<sup>E</sup>V<sup>Q</sup>V<sup>E</sup>V<sup>N</sup>F<sup>K</sup>N<sup>G</sup>Q<sup>R</sup>F<sup>V</sup>N<sup>F</sup>L<sup>T</sup>M<sup>I</sup>p<sup>V</sup>R<sup>D</sup>e<sup>t</sup>g<sup>e</sup>y<sup>r</sup>s<sup>m</sup>g<sup>f</sup>q<sup>c</sup>e</p> <p><b>Proposed:</b> aliSize=99 (resi) RMSD=2.15 (Å)<br/> -----G<sup>I</sup>FF<sup>P</sup>A<sup>L</sup>E<sup>Q</sup>-----N<sup>M</sup>M<sup>G</sup>A<sup>V</sup>I<sup>I</sup>N<sup>E</sup>N--N<sup>D</sup>E<sup>V</sup>M<sup>F</sup>F<sup>N</sup>P<sup>A</sup>E<sup>K</sup>L<sup>W</sup>G<sup>Y</sup>K<sup>R</sup>E<sup>E</sup>V<sup>I</sup>G<sup>N</sup>N<sup>I</sup>D<sup>M</sup>i<sup>P</sup>R-----D<sup>L</sup>-r<sup>p</sup>A--H<sup>p</sup>E<sup>Y</sup>I<sup>r</sup>H<sup>N</sup>-R<sup>E</sup>-----R<sup>E</sup>L<sup>Q</sup>L<sup>E</sup>K<sup>K</sup>D<sup>G</sup>S<sup>K</sup>I<sup>W</sup>T<sup>R</sup>F<sup>A</sup>L<sup>S</sup>K<sup>V</sup>S<sup>A</sup>E<sup>G</sup>K<sup>V</sup>Y<sup>L</sup>A<sup>L</sup>V<sup>R</sup>D<sup>h</sup><br/> mhtlyapgydi<sup>m</sup>g<sup>y</sup>l<sup>i</sup>q<sup>i</sup>imn<sup>r</sup>p<sup>n</sup>p<sup>q</sup>v<sup>e</sup>l<sup>g</sup>p<sup>v</sup>D<sup>T</sup>SC<sup>A</sup>L<sup>I</sup>I<sup>C</sup>D<sup>L</sup>k<sup>Q</sup>k<sup>d</sup>T<sup>P</sup>I<sup>V</sup>Y<sup>A</sup>S<sup>E</sup>F<sup>L</sup>Y<sup>M</sup>T<sup>G</sup>S<sup>N</sup>A<sup>E</sup>V<sup>L</sup>G<sup>R</sup>N<sup>C</sup>R<sup>F</sup>L-Q<sup>S</sup>p<sup>d</sup>g<sup>m</sup>v<sup>k</sup>p<sup>k</sup>s<sup>t</sup>r<sup>k</sup>y<sup>v</sup>d<sup>S</sup>n<sup>t</sup>I--N<sup>T</sup>M<sup>R</sup>K<sup>A</sup>I<sup>D</sup>R<sup>N</sup>A<sup>E</sup>V<sup>Q</sup>V<sup>E</sup>V<sup>N</sup>F<sup>K</sup>N<sup>G</sup>Q<sup>R</sup>F<sup>V</sup>N<sup>F</sup>L<sup>T</sup>M<sup>I</sup>P<sup>V</sup>R<sup>D</sup>e<sup>T</sup>g<sup>E</sup>Y<sup>R</sup>S<sup>M</sup>G<sup>F</sup>Q<sup>C</sup>E-</p> |
| 86 | <p>1v9yA<br/>(103)</p> <p>1f98A<br/>(125)</p> | N | 14.56 | <p><b>TM-align:</b> aliSize=97 (resi) RMSD=2.16 (Å)<br/> -----G<sup>I</sup>FF--P<sup>A</sup>L<sup>E</sup>Q<sup>N</sup>M<sup>M</sup>G<sup>A</sup>V<sup>L</sup>I<sup>N</sup>E<sup>N</sup>D<sup>E</sup>V<sup>M</sup>F<sup>F</sup>N<sup>P</sup><sup>A</sup>E<sup>K</sup>L<sup>W</sup>G<sup>Y</sup>K<sup>R</sup>E<sup>E</sup>V<sup>I</sup>G<sup>N</sup>N<sup>I</sup>D--M<sup>L</sup>I<sup>P</sup>r<sup>d</sup>L<sup>R</sup>P<sup>A</sup>-H<sup>P</sup>E<sup>Y</sup>I<sup>r</sup>H<sup>N</sup>R<sup>E</sup>-----R<sup>E</sup>L<sup>Q</sup>L<sup>E</sup>K<sup>K</sup>D<sup>G</sup>S<sup>K</sup>I<sup>W</sup>T<sup>R</sup>F<sup>A</sup>L<sup>S</sup>K<sup>V</sup>S<sup>A</sup>E<sup>G</sup>K<sup>V</sup>Y<sup>L</sup>A<sup>L</sup>V<sup>R</sup>D-<br/> mehvafgsedient<sup>I</sup>A<sup>K</sup>M<sup>D</sup>d<sup>g</sup>Q<sup>L</sup>D<sup>G</sup>L<sup>A</sup>F<sup>G</sup>A<sup>I</sup>Q<sup>L</sup>D<sup>G</sup>D<sup>G</sup>N<sup>I</sup>L<sup>O</sup>Y<sup>N</sup>A<sup>E</sup>G<sup>D</sup>I<sup>V</sup>C<sup>R</sup>D<sup>P</sup>K<sup>Q</sup>V<sup>I</sup>G<sup>K</sup>N<sup>F</sup>F<sup>k</sup>d<sup>V</sup>A<sup>P</sup>C--T<sup>D</sup>S<sup>P</sup>e<sup>F</sup>Y<sup>G</sup>K<sup>F</sup>K<sup>E</sup>G<sup>V</sup>A<sup>s</sup>gn<sup>I</sup>n<sup>t</sup>m<sup>F</sup>E<sup>Y</sup>T<sup>F</sup>D<sup>Y</sup>-Q<sup>M</sup>T<sup>P</sup>T<sup>K</sup>V<sup>K</sup>V<sup>H</sup>M<sup>K</sup>K<sup>A</sup>L<sup>S</sup>--G<sup>D</sup>S<sup>Y</sup>W<sup>V</sup>F<sup>V</sup>K<sup>R</sup>v</p> <p><b>SARST:</b> aliSize=86 (resi) RMSD=13.35 (Å)<br/> gif-----F<sup>P</sup>A<sup>L</sup>E<sup>Q</sup>N<sup>M</sup>M<sup>G</sup>A<sup>V</sup>L<sup>I</sup>N<sup>E</sup>N<sup>D</sup>E<sup>V</sup>M<sup>F</sup>F<sup>N</sup>P<sup>A</sup>E<sup>K</sup>L<sup>W</sup>G<sup>Y</sup>K<sup>R</sup>E<sup>E</sup>V<sup>I</sup>G<sup>N</sup>N<sup>I</sup>-----D<sup>M</sup>L<sup>I</sup>P<sup>R</sup>D<sup>L</sup>R<sup>P</sup>A<sup>H</sup>P<sup>E</sup>Y<sup>I</sup>r<sup>h</sup>n<sup>r</sup>e<sup>r</sup>l<sup>q</sup>l<sup>e</sup>k<sup>d</sup>D<sup>G</sup>S<sup>K</sup>I<sup>W</sup>T<sup>R</sup>F<sup>A</sup>L<sup>S</sup>K<sup>V</sup>S<sup>A</sup>E<sup>G</sup>K<sup>V</sup>Y<sup>L</sup>A<sup>L</sup>V-----rd<br/> ---mehvafgsedient<sup>I</sup>A<sup>k</sup>m<sup>d</sup>D<sup>G</sup>Q<sup>L</sup>D<sup>G</sup>L<sup>A</sup>F<sup>G</sup>A<sup>I</sup>Q<sup>L</sup>D<sup>G</sup>D<sup>G</sup>N<sup>I</sup>L<sup>O</sup>Y<sup>N</sup>A<sup>E</sup>G<sup>D</sup>I<sup>V</sup>C<sup>R</sup>D<sup>P</sup>K<sup>Q</sup>V<sup>I</sup>G<sup>K</sup>N<sup>F</sup>f<sup>k</sup>d<sup>v</sup>a<sup>P</sup>C<sup>T</sup>D<sup>S</sup>P<sup>E</sup>F<sup>Y</sup>G<sup>K</sup>F<sup>K</sup>E<sup>G</sup>V-----A<sup>S</sup>N<sup>L</sup>N<sup>T</sup>M<sup>F</sup>E<sup>Y</sup>T<sup>F</sup>D<sup>Y</sup>Q<sup>M</sup>T<sup>P</sup>T<sup>K</sup>V<sup>K</sup>V<sup>H</sup>M<sup>K</sup>K<sup>A</sup>l<sup>s</sup>g<sup>d</sup>s<sup>y</sup>w<sup>v</sup>f<sup>v</sup>k<sup>r</sup>v--</p> <p><b>BLAST:</b> aliSize=26 (resi) iden=12.62% (13/103) simi=25.24% (26/103)<br/> giffpa<sup>l</sup>e<sup>q</sup>n<sup>m</sup>m-----G<sup>A</sup>V<sup>L</sup>I<sup>N</sup>E<sup>N</sup>D<sup>E</sup>V<sup>M</sup>F<sup>F</sup>N<sup>P</sup><sup>A</sup>E<sup>K</sup>L<sup>W</sup>G<sup>Y</sup>K<sup>R</sup>E<sup>E</sup>V<sup>I</sup>G<sup>N</sup>N<sup>I</sup>D<sup>M</sup>i<sup>P</sup>r<sup>d</sup>L<sup>R</sup>P<sup>A</sup>--H<sup>P</sup>E<sup>Y</sup>-----i<sup>r</sup>h<sup>n</sup>r<sup>e</sup>r<sup>e</sup>l<sup>q</sup>l<sup>e</sup>k<sup>d</sup>g<sup>s</sup>k<sup>i</sup>w<sup>t</sup>r<sup>f</sup>a<sup>l</sup>s<sup>k</sup>v<sup>s</sup>a<sup>e</sup>g<sup>k</sup>v<sup>y</sup>l<sup>a</sup>l<sup>v</sup>r<sup>d</sup><br/> -----mehvafgsedient<sup>I</sup>A<sup>k</sup>m<sup>d</sup>d<sup>g</sup>q<sup>L</sup>d<sup>G</sup>l<sup>A</sup>f<sup>G</sup>A<sup>I</sup>Q<sup>L</sup>D<sup>G</sup>D<sup>G</sup>N<sup>I</sup>L<sup>O</sup>Y<sup>N</sup>A<sup>E</sup>G<sup>D</sup>I<sup>V</sup>C<sup>R</sup>D<sup>P</sup>K<sup>Q</sup>V<sup>I</sup>G<sup>K</sup>N<sup>F</sup>---K<sup>D</sup>V<sup>A</sup>P<sup>C</sup>t<sup>D</sup>S<sup>P</sup>E<sup>F</sup>y<sup>g</sup>k<sup>f</sup>k<sup>e</sup>g<sup>v</sup>a<sup>s</sup>gn<sup>I</sup>n<sup>t</sup>m<sup>F</sup>e<sup>y</sup>t<sup>f</sup>d<sup>y</sup>q<sup>m</sup>t<sup>p</sup>t<sup>k</sup>v<sup>k</sup>v<sup>h</sup>m<sup>k</sup>k<sup>a</sup>l<sup>s</sup>g<sup>d</sup>s<sup>y</sup>w<sup>v</sup>f<sup>v</sup>k<sup>r</sup>v-----</p> <p><b>Proposed:</b> aliSize=99 (resi) RMSD=1.93 (Å)<br/> -----G<sup>I</sup>FF<sup>P</sup>A-----L<sup>E</sup>Q<sup>N</sup>M<sup>M</sup>G<sup>A</sup>V<sup>L</sup>I<sup>N</sup>E<sup>N</sup>D<sup>E</sup>V<sup>M</sup>F<sup>F</sup>N<sup>P</sup><sup>A</sup>E<sup>K</sup>L<sup>W</sup>G<sup>Y</sup>K<sup>R</sup>E<sup>E</sup>V<sup>I</sup>G<sup>N</sup>N<sup>I</sup>D--M<sup>L</sup>I<sup>P</sup>r<sup>d</sup>L<sup>R</sup>P<sup>A</sup>-H<sup>P</sup>E<sup>Y</sup>I<sup>r</sup>H<sup>N</sup>R<sup>E</sup>-----R<sup>E</sup>L<sup>Q</sup>L<sup>E</sup>K<sup>K</sup>D<sup>G</sup>S<sup>K</sup>I<sup>W</sup>T<sup>R</sup>F<sup>A</sup>L<sup>S</sup>K<sup>V</sup>S<sup>A</sup>E<sup>G</sup>K<sup>V</sup>Y<sup>L</sup>A<sup>L</sup>V<sup>R</sup>D--h<br/> mehvafgsED<sup>I</sup>ENT<sup>I</sup>A<sup>k</sup>m<sup>d</sup>d<sup>g</sup>q<sup>L</sup>D<sup>G</sup>L<sup>A</sup>F<sup>G</sup>A<sup>I</sup>Q<sup>L</sup>D<sup>G</sup>D<sup>G</sup>N<sup>I</sup>L<sup>O</sup>Y<sup>N</sup>A<sup>E</sup>G<sup>D</sup>I<sup>V</sup>C<sup>R</sup>D<sup>P</sup>K<sup>Q</sup>V<sup>I</sup>G<sup>K</sup>N<sup>F</sup>F<sup>k</sup>D<sup>V</sup>A<sup>P</sup>C--T<sup>D</sup>S<sup>P</sup>e<sup>F</sup>Y<sup>G</sup>K<sup>F</sup>K<sup>E</sup>G<sup>V</sup>A<sup>s</sup>gn<sup>I</sup>n<sup>t</sup>m<sup>F</sup>E<sup>Y</sup>T<sup>F</sup>D<sup>Y</sup>-Q<sup>M</sup>T<sup>P</sup>T<sup>K</sup>V<sup>K</sup>V<sup>H</sup>M<sup>K</sup>K<sup>A</sup>L<sup>S</sup>--G<sup>D</sup>S<sup>Y</sup>W<sup>V</sup>F<sup>V</sup>K<sup>R</sup>v-</p>                                                                                                                                                                                                                                                                                                                                                                       |

|    |                                             |   |       |                                                                                                                                                                                                                                                                                                                                                                                                                                                                                                                                                                                                                                                                                                                                                                                                                                                                                                                                                                                                                                                                                                                                                                                                                                                                                                                                                                                                                                                                                                                                                             |
|----|---------------------------------------------|---|-------|-------------------------------------------------------------------------------------------------------------------------------------------------------------------------------------------------------------------------------------------------------------------------------------------------------------------------------------------------------------------------------------------------------------------------------------------------------------------------------------------------------------------------------------------------------------------------------------------------------------------------------------------------------------------------------------------------------------------------------------------------------------------------------------------------------------------------------------------------------------------------------------------------------------------------------------------------------------------------------------------------------------------------------------------------------------------------------------------------------------------------------------------------------------------------------------------------------------------------------------------------------------------------------------------------------------------------------------------------------------------------------------------------------------------------------------------------------------------------------------------------------------------------------------------------------------|
| 87 | <p>1v9yA (103)</p> <hr/> <p>1d7eA (119)</p> | N | 16.50 | <p><b>TM-align:</b> aliSize=94 (resi) RMSD=2.05 (Å)<br/> g-----IFF-PALEQNMMGAVLINENDEVMFFNPAAEKLWYKREEVIGNNID--MLIPrdLRPA-HPEYIRHNRE-----RLELQLEKKDgSKIWTRFALSIVSaegkvYLLALVRD-<br/> -vafgsedientIakmDdGQLDGLAFGAIQLDGDGNILQYNAEAGDITGRDPKQVIGKNFFkdVAPC--TDSPEFYGKfKEGVAsgnIntmFYTFDYQM-TPTKVKVHMKKAL-----SIIWVFKRv</p> <p><b>SARST:</b> aliSize=97 (resi) RMSD=5.75 (Å)<br/> gif-----FPALQNMMGAVLINENDEVMFFNPAAEKLWYKREEVIGNNI-----DMLIPrdLRPAHPEYIRHNRERELQLEKKDgSKIWTRFALSIVSaegkvYLLAL-vrd<br/> ---vafgsedientIakmDdGQLDGLAFGAIQLDGDGNILQYNAEAGDITGRDPKQVIGKNFFkdvaPCTDSPEFYGKfKEGVASGNLNTMFEYTFYQMTPTKVKVHMKKALSIIWVFKRv---</p> <p><b>BLAST:</b> aliSize=26 (resi) iden=12.62% (13/103) simi=25.24% (26/103)<br/> giffpaleqnm-----GAVLINENDEVMFFNPAAEKLWYKREEVIGNNIDmliPRdLRPA--HPEY-----irhnrerelqlekkdgskiwtrfalskvsaeqkvyyllalvrd<br/> -----vafgsedientIakmddgqldglafgAIQLDGDGNILQYNAEAGDITGRDPKQVIGKNFF----KIVAPCtdSPEfygkfkegvasgnIntmfeytdyqmtptkvkvhmkkalsywwfvkrv-----</p> <p><b>Proposed:</b> aliSize=96 (resi) RMSD=2.12 (Å)<br/> G-----IFFP-A-----LEQNMMGAVLINENDEVMFFNPAAEKLWYKREEVIGNNID-MLIPrdLRPA-HPEYIRHNRE-----RLELQLEKKDgSKIWTRFALSIVSaegkvYLLALVRD-h<br/> VafgsedientIakmddgqldglafgAIQLDGDGNILQYNAEAGDITGRDPKQVIGKNFFkdVAPC--TDSPEFYGKfKEGVAsgnIntmFYTFDYQM-TPTKVKVHMKKAL-----SIIWVFKRv-</p>                                                                                                                                                                                                                                      |
| 88 | <p>1lgqA (112)</p> <hr/> <p>1gxcA (116)</p> | C | 24.11 | <p><b>TM-align:</b> aliSize=70 (resi) RMSD=2.32 (Å)<br/> mqPWGRLLRGAEEgEPHVLLRKRREWTIGRRRGDLSP-----S-----NKLVSgDfCRIVVDE---KSGOVLEDTSTSGTVINKLKvkkqtcpLqtgdviylvyrknepehnvaylyesls-----<br/> --PWARLWALQDQ--FANLECVNDNYWFGGRDKSEYCFdepl1krtdkyRTYSKKfFRfREVgpkNSYIAYIEDHSGNGTFVNT-----elvgkgkrrplnnseialslnkvfvfdltvd</p> <p><b>SARST:</b> aliSize=100 (resi) RMSD=12.95 (Å)<br/> mqpwg--RLRLGAEeEPHVLLRKRREWTIGRRRGDLSPsN-----KLVSGDfCRIVV-DEKSG--QVLEDTSTSGTVINKLKvkkqtcpLqtgdviylvyrknepehnvaylyesl--s<br/> -----pwARLWALQD--FANLECVNDNYWFGGRDKSEYCFdepl1krtdkyRTYSKKfFRfREVgpkNSYIAYIEDHSGNGTFVNTelvgkgkrrplnnseialslnkvfvfdltvd</p> <p><b>BLAST:</b> aliSize=49 (resi) iden=28.57% (32/112) simi=43.75% (49/112)<br/> mqPWGRLLRgaEEEPHVLLRKRREWTIGRRRGDLSP-----SNK--LVSGDfCRIVV-DEKSGOVT-LEDTSTSGTVINKLKvkkqtcpLqtgdviylvyrknepehnvaylyesls<br/> --PWARLWALQD--FANLECVNDNYWFGGRDKSEYCFdepl1krtdkyRTYSKKfFRfREVgpkNSYIAYIEDHSGNGTFVNTelvgkgkrrplnnseialslnkvfvfdltvd-----</p> <p><b>Proposed:</b> aliSize=100 (resi) RMSD=1.75 (Å)<br/> mqPWGRLLRGA--eegEPHVLLRKRREWTIGRRRGDLSP-----S-----NKLVSgDfCRIVVDE---KSGOVLEDTSTSGTVINKLKvkkqtcpLqtgdviylvyrknepehnvaylyesls--<br/> --PWARLWALQDgf---ANLECVNDNYWFGGRDKSEYCFdepl1krtdkyRTYSKKfFRfREVgpkNSYIAYIEDHSGNGTFVNTelvgkgkrrplnnseialslnkvfvfdltvd</p>                                                                                                                                                                                                                                                     |
| 89 | <p>1lgqA (112)</p> <hr/> <p>1dmzA (158)</p> | C | 16.96 | <p><b>TM-align:</b> aliSize=72 (resi) RMSD=2.90 (Å)<br/> -MQPWGRLLRGAeeg---EPHVLLR--KREWTIGRRRGDLSPsNKLVSgDfCRIVVDEK-----SGOVLEDTSTSGTVINK-----Lkvkkqt-----Cplqtgdviylvyrknepehnvaylyesls-----<br/> gNGRFLTKPDPD---siiQESLEIQqgVNPFFIGRSEDNCKIE-DNRLSRVfCFfFKKRHavgksmyespaqgLDDIWYCHGTNVSYLNNRmiqgkflIQ-----dgdeikiwdknnkfvigfkveindtglfneglmlqeQ-----rvvlkqtAE</p> <p>-----<br/> ekdlvkk1</p> <p><b>SARST:</b> aliSize=89 (resi) RMSD=16.86 (Å)<br/> mqpw-----GRRLGAEeEPHVllrkrewtIGRRRGDLSPsNKLVSgDfCRIVVDEKsGOVLEDT--STS--TVINKL-----VVKKOTCP--TIDVLYVYRknePEHNvaylyesl-----ls<br/> ---gngfrl1tkplpdsiiqESIEIQQ---VNPFF-----FGRSEDNCKIE-DNRLSRVfCFfFKK--RHAVGKSMYESPAGLDDIWYCHgtgnvsylhnnrMIQGTkFLQDGEIKIWD---KNNKFVIGFKVeindtglfneglmlqeQrvvlkqtAEekdlvkk1--</p> <p><b>BLAST:</b> aliSize=39 (resi) iden=21.43% (24/112) simi=34.82% (39/112)<br/> mqpwgrllrlgaeegepHVllrkrewt-----IGRRRGDLSPsNKLVSgDfCRIVVDE---KSGOVTLEDT-----ISTSGTVINKLVKKOTCP--TIDVLYVYRknepehnvaylyesls<br/> -----gngfrl1tkplpdsiiqesleiqqgnpffIGRSEDNCKIE-DNRLSRVfCFfFKK--RHAVGKSMYESPAGLDDIWYCHgtgnvsylNNRMIOGTkFLQDGEIKIWD---KNNKFVIGFKVeindtglfneglmlqeQrvvlkqtAEekdlvkk1-----</p> <p>nvaylyesls<br/> -----</p> <p><b>Proposed:</b> aliSize=104 (resi) RMSD=2.14 (Å)<br/> m--QPWGRLLRGA--eegEPHVLLR--KREWTIGRRRGDLSPsNKLVSgDfCRIVVDEKs-----GOVLEDTSTSGTVINKLVKKOTCP--TIDVLYVYRknepehnvaylyesl--S-----<br/> -gnGRFLTKPDPDsii--QESLEIQqgVNPFFIGRSEDNCKIE-DNRLSRVfCFfFKK--RHAVGKSMYESPAGLDDIWYCHgtgnvsylNNRMIOGTkFLQDGEIKIWD---KNNKFVIGFKVeindtglfneglmlqeQrvvlkqtAEekdlvkk1</p> |

|    |                |   |       |                                                                                                                                                                                                                                                                                                                                                                                                                                                                                                                                                                                                                                                                                                                                                                                                                                                                                                                                                                                                                                                                                                                                                                                                                                                                                                                                                                                                                                                              |
|----|----------------|---|-------|--------------------------------------------------------------------------------------------------------------------------------------------------------------------------------------------------------------------------------------------------------------------------------------------------------------------------------------------------------------------------------------------------------------------------------------------------------------------------------------------------------------------------------------------------------------------------------------------------------------------------------------------------------------------------------------------------------------------------------------------------------------------------------------------------------------------------------------------------------------------------------------------------------------------------------------------------------------------------------------------------------------------------------------------------------------------------------------------------------------------------------------------------------------------------------------------------------------------------------------------------------------------------------------------------------------------------------------------------------------------------------------------------------------------------------------------------------------|
| 90 | 1lgqA<br>(112) | C | 24.11 | <p><b>TM-align:</b> aliSize=71 (resi) RMSD=2.46 (Å)<br/> M-QPWGRLLRLAeeGEPHVLLR-KREWITIGRRRCDSLFPSP---NKLVSGDHCRIVVDEKSGQVILEDT-STSGTVINKIKvkkqtcpqtgdviylvyrknepehnvaylyesls-----<br/> gssgssgvtgdrAgGRSWCRRVGM--SAGWLLLEdGCEVTVGRGFVTVYQLVskicPLMISRHCVLKQN-PEGQWIMDNKSLNGLVWLNRR-----arleprrvsihgdyiqlgvplnkenaeyeyevtedwetiyplspksgpssg</p> <p><b>SARST:</b> aliSize=103 (resi) RMSD=12.95 (Å)<br/> mqpwg-----RLLRLAEEGEPHVLLRKRrEWITIGRRRCDSLFPSP---PSNKLVSGDHCRIVVDEKSGQVILEDT-STSGTVINKIKVKKQTCPLQTCGDVYIYVYRKNEP---HNVAIYLYE-----sls<br/> -----gssgssgvtgdragrswCRRVGMsAGWLLLEDGCEVTVGRGFVTVYQLVskicPLMISRHCVLKQNPEGQWIMDNKSLNGLVWLNRRARLEPLRVYSIHQGDYIQLGVPLENKnaEYEVETEdwetiyplspksgpssg---</p> <p><b>BLAST:</b> aliSize=54 (resi) iden=28.57% (32/112) simi=48.21% (54/112)<br/> mqpwgr-----LRLAEEepHVLLRKRrEWITIGRRRCDSLFP-SNK----LVSGDHCRIIVVDEKSGQVILEDT-STSGTVINKIKVKKQTCPLQTCGDVYIYVYRKNEPEHNVAIYLYE-----sls<br/> -----gssgssgvtgdragrswCRRVGMsAGWLLLEDGCEVTVGR--FGVTVYQIVSkiCPLMISRHC-VLKNPEGQWIMDNKSLNGLVWLNRRARLEPLRVYSIHQGDYIQLGVPLEN--KENAEYEVETEdwetiyplspksgpssg---</p> <p><b>Proposed:</b> aliSize=102 (resi) RMSD=1.89 (Å)<br/> mq-----PwGRLLRLAeeGEPHVLLR-KREWITIGRRRCDSLFPSP---NKLVSGDHCRIVVDEKSGQVILEDT-STSGTVINKIKVKK-QTCPLQTCGDVYIYVYR---kNEPeHNVAIYLYESL-----s<br/> --gssgssgvtgdragrS-WCRRVGM--SAGWLLLEdGCEVTVGRGFVTVYQLVskicPLMISRHCVLKQN-PEGQWIMDNKSLNGLVWLN-RARLEPLRVYSIHQGDYIQLGVPlen-KEN-AEYEVETEdwetiyplspksgpssg-</p> |
|    | 2cswA<br>(145) |   |       |                                                                                                                                                                                                                                                                                                                                                                                                                                                                                                                                                                                                                                                                                                                                                                                                                                                                                                                                                                                                                                                                                                                                                                                                                                                                                                                                                                                                                                                              |
| 91 | 1lgqA<br>(112) | C | 28.00 | <p><b>TM-align:</b> aliSize=71 (resi) RMSD=2.75 (Å)<br/> m-QPWGRLLRL-GAEEGEPHVLLRKRREWITIGRRRCDSLFPpSNKLVSGDHCRIVVDEKSGQVILEDT-STSGTVINKIKvkkqtcpqtgdviylvyrknepehnvaylyesls-----<br/> -mWTRRLVTIKRSGVDGPHFP-SLSTCLFGRGIECDIRI-QLPVVSKQHCKIEIHE--QEAIIHNFSTNPQVNG-----S-----videpvrkkgdvtiidsrfryene</p> <p><b>SARST:</b> aliSize=87 (resi) RMSD=11.85 (Å)<br/> mqpwgrllr-----LGAEEGepHVLLRKRREWITIGRRRCDSLFPpSNKLVSGDHCRIVVDEKSGQVILEDT-STSGTVINKIKVKKQTCPLQTCGDVYIYVYRKNEPEHNVAIYLYE-sls<br/> -----mwptrrlvtikrSVDG--PHFP-SLSTCLFGRGIECDIRI-QLPVVSKQHCKIEIHEQ--EAIHNFSTNPQVNGSVIDEPVRLKHGDVIT-----IIDRSFRYENe---</p> <p><b>BLAST:</b> aliSize=46 (resi) iden=29.00% (29/100) simi=46.00% (46/100)<br/> QPWGRLLRL--GAEEGepHVLLRKRREWITIGRRRCDSLFPpSNKLVSGDHCRIVVDEKSGQVILEDT-STSGTVINKIKVKKQTCPLQTCGDVYIYVYR-----knepehnvaylyesls<br/> -mWTRRLVTIKRSGVDG-PHFP-SLSTCLFGRGIECDIRIQL-PVVSKQHCKIEIHEQEA-ILHNFSTNPQVNG-SVI-DEPVRKKHGDVITIIDRSfryene-----</p> <p><b>Proposed:</b> aliSize=96 (resi) RMSD=1.98 (Å)<br/> m-QPWGRLLRLGA--EEGepHVLLRKRREWITIGRRRCDSLFPpSNKLVSGDHCRIVVDEKSGQVILEDT-ST-SGTVINKIKVKKQTCPLQTCGDVYIYVYRKNEPEHNVAIYLYESLS<br/> -mWTRRLVTIKRSGVDG-PHFP-SLSTCLFGRGIECDIRI-QLPVVSKQHCKIEIHE--QEAIIHNFSTNPQVNGSVIDEPVRLKHGDVITIIDRSFRYENE-</p>                                                                                                                                                                                                  |
|    | 1r21A<br>(100) |   |       |                                                                                                                                                                                                                                                                                                                                                                                                                                                                                                                                                                                                                                                                                                                                                                                                                                                                                                                                                                                                                                                                                                                                                                                                                                                                                                                                                                                                                                                              |
| 92 | 1lgqA<br>(112) | C | 21.43 | <p><b>TM-align:</b> aliSize=67 (resi) RMSD=2.36 (Å)<br/> m-----QPWGRLLRLGAeeG---EPHVLLR-KREWITIGRRRCDSLFPpSNKLVSGDHCRIVVDEKSGQVILEDT-STSGTVINKIKvkkqtcpqtgdviylvyrknepehnvaylyesls-----<br/> -gssgssgmvtPSLRLVFKG---preGDALDYKpGSTIRVGRIVRgNEIAI-KDAGISTKHLRLESIS--GNWVIOQLgSNGTLLNS-----naldpetsvnlgdgdvklgeytsilvnfvsgpssg</p> <p><b>SARST:</b> aliSize=85 (resi) RMSD=14.13 (Å)<br/> mqpw-----GRLRLAEEGEPHVLLRKRREWITIGRRRCDSLFPpSNKLVSGDHCRIVVDEKSGQVILEDT-STSGTVINKIKVKKQTCPLQTCGDVYIYVYRKNEPehNVAYLYES-----ls<br/> ---gssgssgmvtPSLRLVFKGpreGDALDYKpGSTIRVGRIVRgNEIAIK-----DAGISTKHLRLESIS--GNWVIOQLgSNGTLLNSALDPETSvNIGGDVILK---LGEY---TSIIVNFvsgpssg--</p> <p><b>BLAST:</b> aliSize=37 (resi) iden=19.64% (22/112) simi=33.04% (37/112)<br/> mqpwgrllrlgaegephvllrkrewt-----IGRR-RCDLSFPpSNKLVSGDHCRIVVDEKSGQVILEDT-STSGTVINKIKVKKQTCPLQTCGDVYIYVYRKNEPEHNVAIYLYESLS<br/> -----gssgssgmvtPSLRLVFKGpreGDALDYKpGSTIRVGRIVRgNEIAI-KDAGISTKHLRLESIS--GNWVIOQLgSNGTLLNSALDPETSvNIGGDVILKgeytsilvnfvsgpssg-----</p> <p><b>Proposed:</b> aliSize=96 (resi) RMSD=1.70 (Å)<br/> mq-----PWGRLLRLGA--AeeGEPHVLLR-KREWITIGRRRCDSLFPpSNKLVSGDHCRIVVDEKSGQVILEDT-STSGTVINKIKVKK-QTCP-QTCGDVYIYVYRKNEPEHNVAIYLYESLS-----<br/> --gssgssgmvtPSLRLVFKGpreE--GDALDYKpGSTIRVGRIVRgNEIAI-KDAGISTKHLRLESIS--GNWVIOQLgSNGTLLNSALDPETSvNIGGDVILKgeytsilvnfvsgpssg</p>                                                                                                        |
|    | 1uhtA<br>(118) |   |       |                                                                                                                                                                                                                                                                                                                                                                                                                                                                                                                                                                                                                                                                                                                                                                                                                                                                                                                                                                                                                                                                                                                                                                                                                                                                                                                                                                                                                                                              |

|    |                                             |   |       |                                                                                                                                                                                                                                                                                                                                                                                                                                                                                                                                                                                                                                                                                                                                                                                                                                                                                                                                                                                                                                                                                                                                                                                                                                                                                                                                                                      |
|----|---------------------------------------------|---|-------|----------------------------------------------------------------------------------------------------------------------------------------------------------------------------------------------------------------------------------------------------------------------------------------------------------------------------------------------------------------------------------------------------------------------------------------------------------------------------------------------------------------------------------------------------------------------------------------------------------------------------------------------------------------------------------------------------------------------------------------------------------------------------------------------------------------------------------------------------------------------------------------------------------------------------------------------------------------------------------------------------------------------------------------------------------------------------------------------------------------------------------------------------------------------------------------------------------------------------------------------------------------------------------------------------------------------------------------------------------------------|
| 93 | <p>1lgqA (112)</p> <hr/> <p>2jpeA (132)</p> | C | 17.86 | <p><b>TM-align:</b> aliSize=73 (resi) RMSD=2.85 (Å)<br/> -----MQPWGRLLRLGAE-EGEPHVLLRKREWTIGRRRGCDLSFpSNKLVSGDHCRIVVEKSGQVTELEDTSTSGTVINKLkvvkkqtcplqtgdviylvyrknepehnvaylyesls-----<br/> maaavnsgsslplfdcptwagkPPGLHLDVVKG-dKLEKLIIdEKKYLFGRNPDI CDFTI-DHQSCRVAALVYHKLKRVFIIdLnSTHGTFLGHl-----rlephkqqipidstvsfgastraytlrekpqt</p> <p><b>SARST:</b> aliSize=104 (resi) RMSD=12.50 (Å)<br/> m-----QWGRLLRLGAE-EGEPHVLLRKREWTIGRRRGCDLSFpSNKLVSGDHCRIVVEKSGQVTELEDTSTSGTVINKLkvvkkqtcplqtgdviylvyrknepehnvaylyesls-----<br/> -maaavnsgsslplfdcptwagkPPGLHLDVVKGDKLIIdEKKYLFGRNPDLCDFTIDHQSCRVAALVYHKLKRVFIIdLnSTHGTFLGHlRLEPHKPOQIPIDS---TVSF-GASTRAYTLREKpqt--</p> <p><b>BLAST:</b> aliSize=35 (resi) iden=17.86% (20/112) simi=31.25% (35/112)<br/> mqpwgrllrlgaeeg-----EPHVLLRKREWTIGRRRGCDLSFpSNKLVSGDHCRIVVEKSGQVTELEDTSTSGTVINKLkvvkkqtcplqtgdviylvyrknepehnvaylyesls-----<br/> -----maaavnsgsslplfdcptwagkpppglhldvvgdkliIdEKKYLFGRNPDI CDFTI-DHQSCRVAALVYHKLKRVFIIdLnSTHGTFLGHlRLEPHKPOQIPIDS tvsfgastraytlrekpqt-----</p> <p><b>Proposed:</b> aliSize=101 (resi) RMSD=2.27 (Å)<br/> -----M-QWGRLLRLGAE-EGEPHVLLRKREWTIGRRRGCDLSFpSNKLVSGDHCRIVVEKSGQVTELEDTSTSGTVINKLkvvkkqtcplqtgdviylvyrknepehnvaylyesls-----<br/> maaavnsgsslplfdcptwagkPPGLHLDVVKGDKLIIdEKKYLFGRNPDLCDFTI-DHQSCRVAALVYHKLKRVFIIdLnSTHGTFLGHlRLEPHKPOQIPIDSTVSFGA-----STRAYTLREKpqt</p>   |
| 94 | <p>1lgqA (112)</p> <hr/> <p>1wlnA (120)</p> | C | 14.29 | <p><b>TM-align:</b> aliSize=70 (resi) RMSD=2.36 (Å)<br/> -----MQPWGRLLRLGAE-EGEPHVLLRKREWTIGRRRGCDLSFpSNKLVSGDHCRIVVEKSGQVTELEDTSTSGTVINKLkvvkkqtcplqtgdviylvyrknepehnvaylyesls-----<br/> gssgssGPeKLPYlVElSpdgsdSRDKPKLYRQLSVTEVTEKFDnSIQLF-GPGIQPHGCDLTNMD--GVVTVTPRMDAETVYVDG-----rissetmlqsgmrlqfgtshvfkfvdpsgpgssg</p> <p><b>SARST:</b> aliSize=97 (resi) RMSD=12.25 (Å)<br/> mqpw-----GRLRLGAE-EGEPHVLLRKREWTIGRRRGCDLSFpSNKLVSGDHCRIVVEKSGQVTELEDTSTSGTVINKLkvvkkqtcplqtgdviylvyrknepehnvaylyesls-----<br/> ---gssgssGPeKLPYlVElSpdgsdSRDKPKLYRQLSVTEVTEKFDnSIQLF-GPGIQPHGCDLTNMD--GVVTVTPRMDAETVYVDGQRISETMLQSGMRLQ---FGTS---HVFVKFVDPsgpgssg-</p> <p><b>BLAST:</b> aliSize=19 (resi) iden=9.82% (11/112) simi=16.96% (19/112)<br/> mqpwgrllrlgaeegephvllrkrewtigrrrgcdlsfnsnkvlsgd-----HCRIVVEKSGQVTELEDTSTSGTVINKLkvvkkqtcplqtgdviylvyrknepehnvayl<br/> -----gssgssGPeKLPYlVElSpdgsdSRDKPKLYRQLSVTEVTEKFDnSIQLF-GPGIQPHGCDLTNMD--GVVTVTPRMDAETVYVDGQRISETMLQSGMRLQ---FGTS---HVFVKFVDPsgpgssg-----<br/> yesls<br/> -----</p> <p><b>Proposed:</b> aliSize=100 (resi) RMSD=1.97 (Å)<br/> -----MOPWGRLLRLGAE-EGEPHVLLRKREWTIGRRRGCDLSFpSNKLVSGDHCRIVVEKSGQVTELEDTSTSGTVINKLkvvkkqtcplqtgdviylvyrknepehnvaylyesls-----<br/> gssgssGPeKLPYlVElSpdgsdSRDKPKLYRQLSVTEVTEKFDnSIQLF-GPGIQPHGCDLTNMD--GVVTVTPRMDAETVYVDGQRISETMLQSGMRLQ---FGTS---HVFVKFVDPsgpgssg</p> |
| 95 | <p>1lgqA (112)</p> <hr/> <p>2g11A (103)</p> | C | 17.48 | <p><b>TM-align:</b> aliSize=70 (resi) RMSD=2.78 (Å)<br/> mqPWGRLLRLGAEeg-----EPHVLLRKREWTIGRRRGCDLSFpSNKLVSGDHCRIVVEKSGQVTELEDTSTSGTVINKLkvvkkqtcplqtgdviylvyrknepehnvaylyesls-----<br/> --STPHLVNINEDP-lmseCLLYHIKDGVTTRVGDMDIKL-TGQFIREQHCLFRSIPQDgeVVVTLPECEGAETVYVNG-----K-----lvteplvlksgnrivmgnhvfrrfnh</p> <p><b>SARST:</b> aliSize=75 (resi) RMSD=15.48 (Å)<br/> mqpwgrllrlgaeegeph-----VLLRKREWTIGRRRGCDLSFpSNKLVSGDHCRIVVEKSGQVTELEDTSTSGTVINKLkvvkkqtcplqtgdviylvyrknepehnvaylyesls-----<br/> -----stphlvlnedplmsecllyhiKDGVTTRVGDMDIKL-TGQFIREQHCLFRSIPQDgeVVVTLPECEGAETVYVNGKLVTEplvlksgnrivmgnhvfrrfnh---</p> <p><b>BLAST:</b> aliSize=30 (resi) iden=16.50% (17/103) simi=29.13% (30/103)<br/> mqpwgrllrlgaeegephvllrkrewtigrrrgcdlsf-----SNKLVSGDHCRIVVEKSGQVTELEDTSTSGTVINKLkvvkkqtcplqtgdviylvyrknepehnvaylyesls-----<br/> -----stphlvlnedplmsecllyhiKDGVTTRVGDMDIKL-TGQFIREQHCLFRSIPQDgeVVVTLPECEGAETVYVNGKLVTEPLV-LKSNRILVMGK---HVFRRFNH-----</p> <p><b>Proposed:</b> aliSize=93 (resi) RMSD=1.75 (Å)<br/> mqp-WGRLLRLGAE-----egePHVLLRKREWTIGRRRGCDLSFpSNKLVSGDHCRIVVEKSGQVTELEDTSTSGTVINKLkvvkkqtcplqtgdviylvyrknepehnvaylyesls-----<br/> ---STPHLVNINEDplmsecllyhiKDGVTTRVGDMDIKL-TGQFIREQHCLFRSIPQDgeVVVTLPECEGAETVYVNGKLVTEPLV-LKSNRILVMGK---HVFRRFNH---</p>                                                                                |



|    |                                       |   |       |                                                                                                                                                                                                                                                                                                                                                                                                                                                                                                                                                                                                                                                                                                                                                                                                                                                                                                                                                                                                                                                                                                                                                                                                                                                                                                                                                                                                                       |
|----|---------------------------------------|---|-------|-----------------------------------------------------------------------------------------------------------------------------------------------------------------------------------------------------------------------------------------------------------------------------------------------------------------------------------------------------------------------------------------------------------------------------------------------------------------------------------------------------------------------------------------------------------------------------------------------------------------------------------------------------------------------------------------------------------------------------------------------------------------------------------------------------------------------------------------------------------------------------------------------------------------------------------------------------------------------------------------------------------------------------------------------------------------------------------------------------------------------------------------------------------------------------------------------------------------------------------------------------------------------------------------------------------------------------------------------------------------------------------------------------------------------|
| 96 | <p>1lgqA (112)</p> <p>2pieA (132)</p> | C | 24.11 | <p><b>TM-align:</b> aliSize=72 (resi) RMSD=2.74 (Å)<br/> m-----QPWGR LRLGAEeGEPHVLLRKRrEWtIGRRRCDLSFP---NKLVS GDHCRI VVDeKSGQVLEDT-STSGTVI NK-----Lkvkqtcplqtgdviylvyrknepehnvaylyesls-----<br/> -gahmagrswcLRVGM--SAGWLLedGCEVTVGRGFVTVYQLVskicPLMISRHCVLKQN-PEGOWITMDNkSLNGVWLNARleplrvysihqGD-----yiqlgvplnenaeyeyevteedwetiypclspkn-----</p> <p><b>SARST:</b> aliSize=91 (resi) RMSD=11.32 (Å)<br/> mqpwg-----R LRLGAEeGEPHVLLRKRrEWtIGRRRCDLSFP---PSNKLVS GDHCRI VVDeKSGQVLEDT-STSGTVI NKLVKVKQTCPLOTGD-VIYLVRKN-----epehnvaylyesls<br/> -----gahmagrswcLRVGM--SAGWLLedGCEVTVGRGFVTVYQLVskicPLMISRHCVLKQN-EGOWITMDNkSLNGVWLNARleplrvysihqGDyIQLGVPLENkenaeeyevteedwetiypclspkn-----</p> <p><b>BLAST:</b> aliSize=54 (resi) iden=28.57% (32/112) simi=48.21% (54/112)<br/> mqpwgr-----R LRLGAEeGEPHVLLRKRrEWtIGRRRCDLSFP-SNK-----LVSGDHCRI VVDeKSGQVLEDT-STSGTVI NKLVKVKQTCPLOTGDVIYL-VYRKNepEHNVA LLYE-----sls<br/> -----gahmagrswcLRVGM--SAGWLLedGCEVTVGRGFVTVYQLVskicPLMISRHC-VLKQNPEGOWITMDNkSLNGVWLNARleplrvysihqGDyIQLGVPLEN--KENAEYEevteedwetiypclspkn---</p> <p><b>Proposed:</b> aliSize=103 (resi) RMSD=2.02 (Å)<br/> mq-----PwGR LRLGAEeGEPHVLLRKRrEWtIGRRRCDLSFP---NKLVS GDHCRI VVDeKSGQVLEDT-STSGTVI NKLVKVK-OTCPLOTGDVIYLVR--kNEPHNVA LLYESL-----s<br/> --gahmagrS-WcLRVGM--SAGWLLedGCEVTVGRGFVTVYQLVskicPLMISRHCVLKQN-PEGOWITMDNkSLNGVWLNARleplrvysihqGDyIQLGVPLEN--KENAEYE EVTEEdwetiypclspkn-</p> |
| 97 | <p>1lgqA (112)</p> <p>2eh0A (130)</p> | C | 18.75 | <p><b>TM-align:</b> aliSize=76 (resi) RMSD=3.06 (Å)<br/> m-----QPWGR LRLGAEeGEPHVLLRKRrEWtIGRRRCDLSFP---NKLVS GDHCRI VVDeKSGQVLEDT-STSGTVI NK-----Lkv-----VKkqtcplqtgdviylvyrknepehnvaylyesls<br/> -gssgsSGTPhVNLnEDPLMseCLLYYIKDGI TRVQADaerRQIVL-SGAHIKEEHCIFRSERSNsgeVITLEPCERSEYVNGKrvsqvqlrsGN-riimgknhvfrfnhpeqaraarektsgpsSG-----</p> <p><b>SARST:</b> aliSize=93 (resi) RMSD=11.88 (Å)<br/> mq-----PWGR LRLGAEeGEPHVLLRKRrEWtIGRRRCDLSFP---SNKLVS GDHCRI VVDeKSGQVLEDTSTSGTVI nkLkvkqtcplQOTGDVIYLVRKN-----EPEHNVA LLYE-----sls<br/> --gssgsSGTPhVNLnEDPLMseCLLYYIKDGI TRVQADaerRQIVL-SGAHIKEEHCIFRSERSNsgeVITLEPCERSEYVNGKRV-SQPVQLrsgnrriimgknhvfrfnhpeqaraarektsgpsg---</p> <p><b>BLAST:</b> aliSize=34 (resi) iden=20.54% (23/112) simi=30.36% (34/112)<br/> mqpwgrllrlgaegephvllrkrewtigrrrgcdlsfpsnkl-----VSGDHCRI VVDeKSGQVLEDTSTSGTVI NKLVKVKQTCPLOTGDVIYL-VYRKNepEHNVA LLYE-----hnvaylyesls<br/> -----gssgsgtphvnlndplmsecllyyikdgitrvqadaerRQIVLsgahiKEEHCIFRSERSNsgeVITLEPCERSEYVNGKRV-SQPVQLrsgnrriimgknhvfrfnhpeqaraarektsgpsg-----</p> <p><b>Proposed:</b> aliSize=98 (resi) RMSD=1.94 (Å)<br/> mq-----PWGR LRLGAEeGEPHVLLRKRrEWtIGRRRCDLSFP---SNKLVS GDHCRI VVDeKSGQVLEDTSTSGTVI NKLVKVK-OTCPLOTGDVIYLVRknepehnVAYLYESLS-----<br/> --gssgsgtphvnlndplmsecllyyikdgitrvqadaerRQIVL-SGAHIKEEHCIFRSERSNsgeVITLEPCERSEYVNGKRV-SQPVQLrsgnrriimgknhvfrfnhpeqaraarektsgpsg</p>                         |
| 98 | <p>1lgqA (112)</p> <p>1yj5C (105)</p> | C | 16.19 | <p><b>TM-align:</b> aliSize=68 (resi) RMSD=3.54 (Å)<br/> mq--PWGR LRLGAEeGEPHVLLRKRrEWtIGRRRCDLSFP---SNKLVS GDHCRI VVDeKSGQVLEDTSTSGTVI NK-----Lkvkqtcplqtgdviylvyrknepehnvaylyesls-----<br/> --srgRLWQSP-TG-GPPPIFLPSdgQALVLRGP---ITQVTDKCSRNOVELIADPEsRTAVKQLGVNPSTVGV-helkpglsgsls-----lgdvlvnglypltlrweels-----</p> <p><b>SARST:</b> aliSize=99 (resi) RMSD=14.23 (Å)<br/> mqpw----GRLRLGAEeGEPHVLLRKRrEWtIGRRRCDLSFP---SNKLVS GDHCRI VVDeKSGQVLEDTSTSGTVI NKLVKVKQTCPLOTGDVIYLVRKNepHNVA LLYESL--s<br/> ----srgRLWQSP-TG-GPPPIFLPSdgQALVLRGP---ITQVTDKCSRNOVELIADPEsRTAVKQLGVNPSTVGVHELKPGLSGS-SLGDVLYLNGLY----PLTLRWEELs-</p> <p><b>BLAST:</b> aliSize=39 (resi) iden=19.05% (20/105) simi=37.14% (39/105)<br/> mqpw--GRLRLGAEeGEPHVLLRKRrEWtIGRRRCDLSFP---SNKLVS GDHCRI VVDeKSGQVLEDTSTSGTVI NKLVKVKQTCPLOTGDVIYLVRKNepHNVA LLYESL--s<br/> ----srgRLWQSP-TG-GPPPIFLPSdgQALVLRGP---ITQVTDKCSRNOVELIADPEsRTAVKQLGVNPSTVGVHELKPGLSGS-SLGDVLYLNGLYpltlrweels-----</p> <p><b>Proposed:</b> aliSize=94 (resi) RMSD=2.48 (Å)<br/> mq--PWGR LRLGAEeGEPHVLLRKRrEWtIGRRRCDLSFP---SNKLVS GDHCRI VVDeKSGQVLEDTSTSGTVI NKLVKVK-OTCPLOTGDVIYLVRknepehnVAYLYESLS--<br/> --srgRLWQSP-TG-GPPPIFLPSdgQALVLRGP---ITQVTDKCSRNOVELIADPEsRTAVKQLGVNPSTVGVHELKPGLSGS-SLGDVLYLNGLYpltlrweels</p>                                                                                                                                       |

|     |                |   |       |                                                                                                                                                                                                                                                                                                                                                                                                                                                                                                                                                                                                                                                                                                                                                                                                                                                                                                                                                                                                                                                                                                                                                                                                                                                                                                                                                                                                                                                                            |
|-----|----------------|---|-------|----------------------------------------------------------------------------------------------------------------------------------------------------------------------------------------------------------------------------------------------------------------------------------------------------------------------------------------------------------------------------------------------------------------------------------------------------------------------------------------------------------------------------------------------------------------------------------------------------------------------------------------------------------------------------------------------------------------------------------------------------------------------------------------------------------------------------------------------------------------------------------------------------------------------------------------------------------------------------------------------------------------------------------------------------------------------------------------------------------------------------------------------------------------------------------------------------------------------------------------------------------------------------------------------------------------------------------------------------------------------------------------------------------------------------------------------------------------------------|
| 99  | 1lgqA<br>(112) | C | 15.18 | <p><b>TM-align:</b> aliSize=65 (resi) RMSD=3.11 (Å)<br/> mq-----PWGRLLRLgAEeE-HVLLRK-R-EWTIGRRRgcdSFP SNKLVSGDHCRIVVDEKSGQ--TLEDTSTSGTVINKLkvvkkqtcpqltgdviylvrknepehnvaylyesls-----<br/> --gssgssgmsqlgsrGRLWQSP-TG-PPPIFIPSDGqALVLRGP---TQVTDKRCRNQVELIADP--ESrtAVKQLGVNPSTVGV-----qelkpglsgslsgdvllylvglypltlrwsgpssg</p> <p><b>SARST:</b> aliSize=97 (resi) RMSD=13.20 (Å)<br/> mqpw-----GRLRLAEEGEPHVLLRrEWITIGRRRGCDLsfpSNKLVSGDHCRIVVDEKSGQVLEDTSTSGTVINKLKVVKKQTCPTQTDVIVLYVRKNepohnVAYLYES-----ls<br/> ----gssgssgmsqlgsrgrlWLOSPTPGPPPIFLPSDGO-ALVLRGPLTQV---TDRKCSRNOVELIADPESRTAVKQLGVNPSTVGVQELKPGLSGSLSLGDVLYLNGLY----PLTRWSgpssg--</p> <p><b>BLAST:</b> aliSize=39 (resi) iden=17.86% (20/112) simi=34.82% (39/112)<br/> mqpw-----GRLRLAEEGEPHVLLRrEWITIGRRRGCDLsfpSNKLVSGDHCRIVVDEKSGQVLEDTSTSGTVINKLKVVKKQTCPTQTDVIVLYVRKNepohnvaylyesls<br/> ----gssgssgmsqlgsrGRLWLOSPTPGPPPIFLPSDGOALVLRGP-PLTQVTDKRCRNQVELIADPESRTAVKQLGVNPSTVGVQELKPGLSGSLSLGDVLYLNGLYpltlrwsgpssg-----</p> <p><b>Proposed:</b> aliSize=92 (resi) RMSD=2.29 (Å)<br/> mq-----PWGRLLRLgAEeE-HVLLRK-R-EWTIGRRR-gcdS-FpSNKLVSGDHCRIVV-ekSG-QVLEDTSTSGTVINKLKVVK-KQTCPTQTDVIVLYVRknepehNVAYLYESL-----s<br/> --gssgssgmsqlgsrGRLWQSP-TG--Gp-PPPIFIPSDGqALVLRG-Gp---TQV-TDRKCSRNOVELIADp--ESrtAVKQLGVNPSTVGVQELKpGLSGSLSGDVLYLNG-----LYPLTRWSgpssg-</p>                                                                                                                                     |
| 100 | 1lgqA<br>(112) | C | 24.11 | <p><b>TM-align:</b> aliSize=70 (resi) RMSD=3.03 (Å)<br/> genitqptqstqatqrfliedfsqeqigenIVCRVICTTG----qIPTRDSADISqvlkekrsikKVVTFGRNPACDYHLGNI SRLSNKIFOLLG-EDNLLNDI STNGTWLNGQKvcknsnqlsqG-----Lkvvkkqtcpqltgdviylvrknepehnvaylyesls-----deitvvgvesdilsivifin<br/> -----<br/> dkfkqcleqnkvdrir</p> <p><b>SARST:</b> aliSize=83 (resi) RMSD=13.46 (Å)<br/> mqpwgrllrlgaegephvllrkr-----EWTIGRRRGCDLsfpSNKLVSGDHCRIVVDEKSGQVLEDTSTSGTVINKLKVVKKQTCPTQTDVIVLYVRKNepohnVAYLYES-----ls<br/> -----genitqptqstqatqrfliedfsqeqigenivcrvicttgqipirdlsadISqvlkekrsikKVVTFGRNPACDYHLGNI SRLSNKIFOLLG-EDNLLNDI STNGTWLNGQKVEKNSNQLSQDEIT--VGVGVESDILSLVIFIndkfkqcleqnkvdrir--</p> <p><b>BLAST:</b> aliSize=35 (resi) iden=23.21% (26/112) simi=31.25% (35/112)<br/> mqpwgrllrlgaegephvllr-----EWTIGRRRGCDLsfpSNKLVSGDHCRIVVDEKSGQVLEDTSTSGTVINKLKVVKKQTCPTQTDVIVLYVRKNepohnvaylyesls<br/> -----genitqptqstqatqrfliedfsqeqigenivcrvicttgqipirdlsadISqvlkekrsikKVVTFGRNPACDYHLGNI SRLSNKIFOLLG-EDNLLNDI STNGTWLNGQKVEKNSNQLSQDEITvvgvesdilsivifindkfkqcleqnkvdrir--</p> <p>yrknepehnvaylyesls<br/> -----</p> <p><b>Proposed:</b> aliSize=104 (resi) RMSD=2.41 (Å)<br/> m-----OPWGRLLRLGA--eegE-HVLLRK-----REWTIGRRRGCDLsfpSNKLVSGDHCRIVVDEKSGQVLEDTSTSGTVINKLKVVKKQTCPTQTDVIVLYVRknepehNVAYLYESLS-----<br/> --genitqptqstqatqrfliedfsqeqigenIVCRVICTTGqi----IPTRDSADISqvlkekrsikKVVTFGRNPACDYHLGNI SRLSNKIFOLLG-EDNLLNDI STNGTWLNGQKVEKNSNQLSQDEITVGVG--VESDILSLVIFINDkfkqcleqnkvdrir</p> |
| 101 | 1lgqA<br>(112) | C | 18.00 | <p><b>TM-align:</b> aliSize=66 (resi) RMSD=3.44 (Å)<br/> mqPWGRLLRLgAEeGEHVLLRK--REWTIGRRRgcdSFP SNKLVSGDHCRIVVDEK-SGQVLEDTSTSGTVINKLkvvkkqtcpqltgdviylvrknepehnvaylyesls-----<br/> --GRLWLESP-PG-EA-PPPIFIPSDGqALVLRGP---TQVTDKCSRTOVELIADP-ETRTAVKQLGVNPSTIGQ-----elkpglegs lvgdtylvnglhpltlrwee</p> <p><b>SARST:</b> aliSize=95 (resi) RMSD=13.22 (Å)<br/> mqpw---GRLRLAEEGEPHVLLRrEWITIGRRRGCDLsfpSNKLVSGDHCRIVVDEKSGQVLEDTSTSGTVINKLKVVKKQTCPTQTDVIVLYVRKNepohnVAYLYES-----s<br/> ----grlWLESPP-PAEAPPFLPSDGOALVLRGP-PLTQV----TDRKCSRTOVELIADPETRTAVKQLGV-NPSTIGQELKPGLEGS-IGVGTLYLNGLH----PLTLRWEe---</p> <p><b>BLAST:</b> aliSize=41 (resi) iden=24.00% (24/100) simi=41.00% (41/100)<br/> mqpwGRLRLAEEGEPHVLLRrEWITIGRRRGCDLsfpSNKLVSGDHCRIVVDEKSGQVLEDTSTSGTVINKLKVVKKQTCPTQTDVIVLYVRKNepohnvaylyesls<br/> ----GRLWLESP-PAEAPPFLPSDGOALVLRGP-PLTQVTDKCSRTOVELIADPETRTAVKQLGVNPSTIGQELKPGLEGS--IGVGTLYLNGlhpltlrwee-----</p> <p><b>Proposed:</b> aliSize=91 (resi) RMSD=2.37 (Å)<br/> mqPWGRLLRLgAEeGEHVLLRK--REWTIGRRR-gcdS-FpSNKLVSGDHCRIVV-eksGQ--TLEDTSTSGTVINKLKVVK-KQTCPTQTDVIVLYVRknepehNVAYLYESLS<br/> --GRLWLESP-PG--PA-PPPIFIPSDGqALVLRG-Gp---TQV-TDRKCSRTOVELIADp--ETrtAVKQLGVNPSTIG-QELKpGLEGS-IGVGTLYLNG-----LHPLTLRWE</p>                                                                                                                                                                                                                            |
|     | 2brfA<br>(100) |   |       |                                                                                                                                                                                                                                                                                                                                                                                                                                                                                                                                                                                                                                                                                                                                                                                                                                                                                                                                                                                                                                                                                                                                                                                                                                                                                                                                                                                                                                                                            |

|     |   |       |                                                                                                                                                                                                                                                                                                                                                                                                                                                                                                                                                                                                                                                                                                                                                                                                                                                                                                                                                                                                                                                                                                                                                                                                                                                                                                                                                                                                                                                                  |
|-----|---|-------|------------------------------------------------------------------------------------------------------------------------------------------------------------------------------------------------------------------------------------------------------------------------------------------------------------------------------------------------------------------------------------------------------------------------------------------------------------------------------------------------------------------------------------------------------------------------------------------------------------------------------------------------------------------------------------------------------------------------------------------------------------------------------------------------------------------------------------------------------------------------------------------------------------------------------------------------------------------------------------------------------------------------------------------------------------------------------------------------------------------------------------------------------------------------------------------------------------------------------------------------------------------------------------------------------------------------------------------------------------------------------------------------------------------------------------------------------------------|
| 102 | M | 27.20 | <p><b>2pfsA (125)</b></p> <p><b>TM-align:</b> aliSize=109 (resi) RMSD=1.97 (Å)<br/> sVHHILLAVDFSSQVQVRNLSQIGARLSLHVLDtaipldtetty-----DALDVEKQKLSQIGNTL--GIdpaHRWLWVEPREEIRIAEQENVDLIVVGS-----S--TANSVLHYACDVLAVR---<br/> -MYKHILLVAVDLSEESPIILLKKAAGIAKRHDAKLSIIHVLDV-----nfsdlytglidvnmsmqdRISTETQKALDLAESVDYPIIS--EKLSGSDLGQVLSDAIEQYVDLLMTCHqdfwskLmsSTROMNTIIDMLVVPird</p> <p><b>SARST:</b> aliSize=119 (resi) RMSD=6.62 (Å)<br/> svy--HILLAVDFSSQVQVRNLSQIGARLSLHVLDTA--IPLDTETTYDALD-----VEKQKLSQIGNTLGIDPAHRWLWVEPREEIRIAEQENVDLIVVGS-----HSTANSVLHYACDVLAVR---1<br/> ---myKHILLVAVDLSEESPIILLKKAAGIAKRHDAKLSIIHVLDVnfsdLYTGLIDVNMSSmqdrisTETQKALDLAESVDYPISEKLSGSDLGQVLSDAIEQYVDLLMTCHqdfwskLMSSTROMNTIIDMLVVPird-</p> <p><b>BLAST:</b> aliSize=68 (resi) iden=33.33% (41/125) simi=55.28% (68/125)<br/> sVHHILLAVDFSSQVQVRNLSQIGARLSLHVLD-----LDTA-IPLDTETTYDALDVEKQKLSQIGNTLGIDPAHRWLWVEPREEIRIAEQENVDLIVVGS-----S--TANSVLHYACDVLAVR---<br/> -MYKHILLVAVDLSEESPIILLKKAAGIAKRHDAKLSIIHVLDVnfsdLYTGLIDVNMSSmqdrisTETQKALDLAESVDYPISEKLSGSDLGQVLSDAIEQYVDLLMTCHqdfwskLmsSTROMNTIIDMLVVPird</p> <p><b>Proposed:</b> aliSize=119 (resi) RMSD=1.71 (Å)<br/> msVHHILLAVDFSSQVQVRNLSQIGARLSLHVLDtA---iPLDTETTYDAML D-----VEKQKLSQIGNTL--GIdpaHRWLWVEPREEIRIAEQENVDLIVVGS-----S--TANSVLHYACDVLAVR---<br/> --MYKHILLVAVDLSEESPIILLKKAAGIAKRHDAKLSIIHVLDVnfsdLYTGLIDVNMSSmqdrisTETQKALDLAESVDYPIIS--EKLSGSDLGQVLSDAIEQYVDLLMTCHqdfwskLmsSTROMNTIIDMLVVPird</p>    |
| 103 | C | 12.00 | <p><b>2qntA (125)</b></p> <p><b>TM-align:</b> aliSize=58 (resi) RMSD=3.03 (Å)<br/> nlyfqgrfvnpipfvrdirnrsksfyrdrlg--Lkiledfgsfvlf---ETGfaihegrsleetiwrtsqeyg-----RRNLLYFEHADVDAAFOIAPH--VELIHPLERQAWG-ORVFRFYDPDGHAEV<br/> -----lyfqg-----gmtGRI-----vhfeipfdgdrarafyrdafgwaiaepdmDYSMTtGpvgesgmpdepyinggmqrgevtTPVVTVDVESIESALERIESlgKTVTGRTPV-GNmGFAAYTISEGNVGL</p> <p>GSL-<br/> WTAr</p> <p><b>SARST:</b> aliSize=110 (resi) RMSD=14.09 (Å)<br/> nlyf-----QGRFVNPIPFVRDIRNRSKSFYRDRLKLEDFGsfvlf---GFATHEgrsleetIWR-----TSSQFAYGRNLLYFEHADVDAAFOIA--PHVELIHPLERQAWGORVFRFYDPDGHAEVGS--1<br/> ----lyfqgMTGRIVHFEIPFDGDARAFYRDAFGWAIAEIPDMDYSMTTGPVGV-----ESGmpdepyingGMMQRGEVTPVVTVDVESIESALERIESLGGKTVTGRTPVGNMGFAAYTISEGNVGLWETar-</p> <p><b>BLAST:</b> aliSize=29 (resi) iden=17.89% (22/125) simi=23.58% (29/125)<br/> nlyfQG-----RFVNPIPFVRDIRNRSKSFYRDRLKLEDFGsfvlf---GFATHEgrsleetiwrtsqeygrnlllyfehadvdaafqiaphvelihplerqaw<br/> --lyfQgMTGRIVHFEIPFDGDARAFYRDAFGWAIAEIPDM-DYSMTTGPVgesgmpdepyinggmqrgevtTPVVTVDVESIESALERIESlggkvtgrtpvgnmgfaayftdsegnvvlwetar-----<br/> qrvfrydpdghaievgesl</p> <p><b>Proposed:</b> aliSize=102 (resi) RMSD=2.24 (Å)<br/> nlyf-----QGRFVNPIPFVRDIRNRSKSFYRDRLKLEDFGsfvlf---GFATHEGR--sleetiwrtsqeygrnlllyfehadvdaafQdIAP--HVELIHPLERQAWGORVFRFYDPDGHAEVGS--1<br/> ----lyfqgMTGRIVHFEIPFDGDARAFYRDAFGWAIAEIPDMDYSMTTtGpvgesgmpdepyingGMMQRGev-----TTPVVTVDVESIESALERIESlggkvtgrtpvgnmgfaayftdsegnvvlwetar-</p>         |
| 104 | N | 11.20 | <p><b>2qntA (125)</b></p> <p><b>TM-align:</b> aliSize=61 (resi) RMSD=3.24 (Å)<br/> nlyfQGRFVNPIPFVRDIRNRSKSFYRDRLKLEDFG-----SFVLFETGFAIHEGRS1--EETiwrTSS--OEAYGRrNlllyfehadvdaafaiaphvelihplerqawqrvfrfydpdghaievgesl-----<br/> ----SLKVHHIGYAVKNDSALKKFK-RLGYVEESEVvrdevrkvYIQFVingGYRVELVAPDgedS---PINKtiKKGSTP-Y-----hicyevediaksieemsqiytlfkkaeiapaidnrkvafifstdigiellek</p> <p><b>SARST:</b> aliSize=106 (resi) RMSD=12.71 (Å)<br/> nlyfqgr---FVNPIPFVRDIRNRSKSFYRDRLKLEDFG-----FGSFLVETGFAIHEG-----RSLIETIWRSSOEAYGRNLLYFEHADVDAAFOIAPH--VELIHPLERQAWG-ORVFRFYDPDGHAEVGS--s1<br/> -----slkvHHIGYAVKNDSALKKFK-RLGYVEESEVvrdevrkvYIQFvINGGYRVELVapdgedsPINKTIKKGSTPYH-----ICYEVEIQKSIEMSQigyTLFKKAEIAPIDNRKVAFLFSTIIGLLELLEK--</p> <p><b>BLAST:</b> aliSize=9 (resi) iden=4.88% (6/125) simi=7.32% (9/125)<br/> nlyfqgrfvnpipfvrdirnrsksfyrdrlgkiledfgsfvlfetgfaihegrsleetiwrtsqeygrnlllyfehadvda-----slkvhhigavknidsalkkfkrlgyveesevvrdevrkvYIQFVinggyrvelvapdgedspinktikkgstpyhicyevediaksieemsqiytlfkkaeiapa</p> <p>-----AFQIAPHVELIHPLERQAWqrvfrfydpdghaievgesl<br/> idnrkvAFLFSTDIIGLLELLEK</p> <p><b>Proposed:</b> aliSize=109 (resi) RMSD=2.23 (Å)<br/> nlyfQGRFVNPIPFVRDIRNRSKSFYRDRLKLEDFG-----SFVLFETGFAIHEGRS--leEtiwrT-SS--OEAYG-rnNLLYFEHADVDAAFO-dIAP-HVELIHPLERQAW--GORVFRFYDPDGHAEVGS1<br/> -----SLKVHHIGYAVKNDSALKKFK-RLGYVEESEVvrdevrkvYIQFVingGYRVELVAPDged--S---PINKtiKKGSTP---YHICYEVEIQKSIEMSQIgyTLFKKAEIAPIDNRKVAFLFSTIIGLLELLEK-</p> |
|     |   |       |                                                                                                                                                                                                                                                                                                                                                                                                                                                                                                                                                                                                                                                                                                                                                                                                                                                                                                                                                                                                                                                                                                                                                                                                                                                                                                                                                                                                                                                                  |

|     |                                                     |   |       |                                                                                                                                                                                                                                                                                                                                                                                                                                                                                                                                                                                                                                                                                                                                                                                                                                                                                                                                                                                                                                                                                                                                                                                                                                                                                                                                                                                                                                                                                                                                                                                                                                        |
|-----|-----------------------------------------------------|---|-------|----------------------------------------------------------------------------------------------------------------------------------------------------------------------------------------------------------------------------------------------------------------------------------------------------------------------------------------------------------------------------------------------------------------------------------------------------------------------------------------------------------------------------------------------------------------------------------------------------------------------------------------------------------------------------------------------------------------------------------------------------------------------------------------------------------------------------------------------------------------------------------------------------------------------------------------------------------------------------------------------------------------------------------------------------------------------------------------------------------------------------------------------------------------------------------------------------------------------------------------------------------------------------------------------------------------------------------------------------------------------------------------------------------------------------------------------------------------------------------------------------------------------------------------------------------------------------------------------------------------------------------------|
| 105 | <p>2rbbA<br/>(129)</p> <hr/> <p>2r6uA<br/>(130)</p> | N | 14.73 | <p><b>TM-align:</b> aliSize=63 (resi) RMSD=2.97 (Å)<br/> nadlsyvniftrdivasafyqqv--Gfqeiesirspifrgld---TGKScigfnahe<b>ayelqlaqfsets</b>-----GIKFLLNFdvdTkeAVDKLVPVAIAAATLTKAPYETYYHWYQAVLLDPERNVFRINNVL-<br/> -----lyfQ-----gmtGRIV-----hfeipddgdrarafyrdafgwaiaeipmdysmvtgpgvesgmpdepgynggmmq<b>rgevTTPVVTVDV</b>-E--SIESALERIESLGKTVTGRTPVGNMGFAAYFTDSEGNNVGLWETAr</p> <p><b>SARST:</b> aliSize=105 (resi) RMSD=14.61 (Å)<br/> nad-----LSYVNIIFTRDIVASAFYQOV--GfQEiesirspifrgld---TGKScigfnahe<b>ayelQLAOF</b>-----SETSGIKF-----LLNFdvdTkeAVdklVPVAIAAATLTKAPYETYYHWYQAVLLDPERNVFRINNV--1<br/> ---lyfqgmtgrIVHFEIPFDGDRARAFYRDAFGWAI--AEIPMDYSMVTTGP-----VGESGmpdepgYINGGMMQ<b>rgevtTPVVTVDV</b>ESISA---LERIESLGKTVTGRTPVGNMGFAAYFTDSEGNNVGLWETar-</p> <p><b>BLAST:</b> aliSize=14 (resi) iden=7.94% (10/129) simi=11.11% (14/129)<br/> nadlsyvniftrdiv-----SAPSYOOVFGFQETIESIRSPIFRGLDTG-----KSCIGFNAHE<b>ayelQLAOFSE</b>-----TSGIKFLLNFdvdTkeAVDKLVPVAIAAATLTKAPYETYYHWYQAVLLDPERNVFRINNVL-<br/> -----lyfqgmtgrivhfeipddgdrARAFYRDAFGWAI--AEIPMDYSMVTTGPvgesgmpdepgynggmmq<b>rgevtTPVVTVDV</b>ESIESALERIESlggktvtgrtpvgnmgfaayftdsegnvvlwetar-----kscigfnahe<b>ayelqlaqfsets</b>gikfllnfvdvtkeavdklvp<br/> vaiaagatlkapetyyyhwyqavlldpernvfrinnvl<br/> -----</p> <p><b>Proposed:</b> aliSize=110 (resi) RMSD=2.08 (Å)<br/> -----NMADLSYVNIIFTRDIVASAFYQOVFGFQETIESIR--SPIFRGLDTG-----KSCIGFNAHE<b>ayelqlaqfsets</b>gikfllnfvdvtkeAVDKLVPVAIAAATLTKAPYETYYHWYQAVLLDPERNVFRINNVL-<br/> lyfqgMTGRIVHFEIPFDGDRARAFYRDAFGWAI--IPMDYSMVTTGPvgesgmpdepgYINGGMMQRGEV-----T-----TPVVTVDV--SIESALERIESLGKTVTGRTPVGNMGFAAYFTDSEGNNVGLWETAr</p> |
| 106 | <p>2rbbA<br/>(129)</p> <hr/> <p>2qh0A<br/>(129)</p> | C | 10.08 | <p><b>TM-align:</b> aliSize=67 (resi) RMSD=3.58 (Å)<br/> NADLSYVNIIFTRDIVASAFYQOVFGFQETIESIRSP-----IFRGLDTGKSCIGFNAHE<b>AYELQLAOFSE-TSGIKFLLNF</b>fdvdtkeavdklvpvaiaagatlkapetyyyhwyqavlldpernvfrinnvl-----<br/> SLKVHHIGYAVKNDSALKKFKR-LGYVEESE-VVRdevrkvYIQFVINGYRVELV<b>PDGEDS--PINKTIKKGSTPY</b>-----hicyevediQKSIEMSQIGYTLFKKAEIAPaidnrkvaflfstdigliellek</p> <p><b>SARST:</b> aliSize=119 (resi) RMSD=13.35 (Å)<br/> na--DLSYVNIIFTRDIVASAFYQOVFGFQETIESIRSP-----IFRGLDTGKSCIGFNAHE<b>AYELQLAOFSE-TSGIKFLLNF</b>fdvdtkeAVDKLVPVAIAAATL--IKAPYETYYHWYQAVLLDPERNVFRINnVL<br/> --s1KVHHIGYAVKNDSALKKFKRLGYveeseVVRdevrkvYIQFVINGYRVELV<b>PDGEDSPINKTIKKGSTPY</b>HICYE-VEDIQKSIEEMS---QIYTLFKKAEIAPaidnrkvaflfstdigliellek</p> <p><b>BLAST:</b> aliSize=46 (resi) iden=23.81% (30/129) simi=36.51% (46/129)<br/> nad-----LSYVNIIFTRDIVASAFYQOVFGFQETIESIR-----SPIFRGLDTGKSCIGfnaHE<b>AYELQLAOFSE-TSGIKFLLNF</b>fdvdtkeAVDKLVPVAIAAATLTKAPYETYYHWYQAVLLDPERNVFRINNVL-<br/> ---s1kvhhiGYAVKNDSALKKFKRLGYveeseVVRdevrkvYIQFVINGYRVELV<b>PDGEDSPINKTIKKGSTPY</b>-----HICYEVEDIQKSIEEMSQIGYTLFKKAEIAPaidnrkvaflfstdigliellek</p> <p><b>Proposed:</b> aliSize=112 (resi) RMSD=2.05 (Å)<br/> nMADLSYVNIIFTRDIVASAFYQOVFGFQETIESIRSP-----IFRGLDTGKSCIGFNAHE---aYelqlaqfsetsgikfllnfvdvtkeAVDKLVPVAIAAATLTKAPYETYY--HWYQAVLLDPERNVFRINNV1<br/> -SLKVHHIGYAVKNDSALKKFKR-LGYVEESE-EVVRdevrkvYIQFVINGYRVELV<b>PDGEDS--PINKTIKKGSTPY</b>HICYEVEDIQKSIEEMSQIGYTLFKKAEIAPaidnrkvaflfstdigliellek</p>                                                                                                                                                |
| 107 | <p>2p7oA<br/>(127)</p> <hr/> <p>2r6uA<br/>(130)</p> | C | 13.39 | <p><b>TM-align:</b> aliSize=63 (resi) RMSD=3.99 (Å)<br/> misglshittlivkdlnkttaflni--naeeiytfslskekffl---IAGLwicime<b>gdsIgc</b>-----RTYNHIAFOIOSseEVDEYTERKALGVEMKPEPRVOGERSIYYFDNHLFEHAGTleerlk<br/> -----lyfQ-----gmtGRIV-----hfeipddgdrarafyrdafgwaiaeipmdysmvtgpgvesgmpdepgynggmmq<b>rgeVTTPVVTVDV</b>ESIESALERIESLGKTVTGRTPVGNMGFAAYFTDSEGNNVGLWETAr-----</p> <p>ryh<br/> ---r</p> <p><b>SARST:</b> aliSize=114 (resi) RMSD=13.53 (Å)<br/> misg-----SHTLIVKLNKTTAFNLONINAAEIIYTFSLSEKFFLI-----AGLWICIME<b>GDSLOERTY</b>NHIAFOIOSseEVDEYTERKALGVEMKPEPRVOGERSIYYFDNHLFEHAGTleerlkryh<br/> ---lyfqgmtgrIVHFEIPFDGDRARAFYRDAFGWAI--AEIPMDYSMVTTGPvgesGMPDEPGYINGGMMQ<b>rgevtTPVVTVDV</b>ESIESALERIESLGKTVTGRTPVGNMGFAAYFTDSEGNNVGLWETAr-----</p> <p><b>BLAST:</b> aliSize=27 (resi) iden=11.81% (15/127) simi=21.26% (27/127)<br/> misglshittlivkdlnkttaflninaeeiytfslskekffliaglwici-----ME<b>GDSLOERTY</b>NHIAFOIOSseEVDEYTERKALGVEMKPEPRVOGERSIYYFDNHLFEHAGTleerlk<br/> -----lyfqgmtgrivhfeipddgdrarafyrdafgwaiaeipmdysmvtgpgvesgmpdepgYINGGMMQRGEVTPVVTVDVESIESALERIESLGKTVTGRTPVGNMGFAAYFTDSEGNNVGLWETAr-----</p> <p>kryh<br/> ----</p> <p><b>Proposed:</b> aliSize=101 (resi) RMSD=2.07 (Å)<br/> -----MISGLSHITLIVKLNKTTAFNLONINAAEIIYTFSLSEKFFLI-----AGLWICIME<b>gdsIgc</b>-----RTYNHIAFOIOSseEVDEYTERKALGVEMKPEPRVOGERSIYYFDNHLFEHAGTleerlkryh<br/> lyfqgMTGRIVHFEIPFDGDRARAFYRDAFGWAI--AEIPMDYSMVTTGPvgesgmpdepgYINGGMMQRGEV-----TTPVVTVDV--SIESALERIESLGKTVTGRTPVGNMGFAAYFTDSEGNNVGLWETAr-----</p>                                                                                                                         |

|     |                                               |   |       |                                                                                                                                                                                                                                                                                                                                                                                                                                                                                                                                                                                                                                                                                                                                                                                                                                                                                                                                                                                                                                                                                                                                                                                                                                                                                                                                                                                                                                                                                     |
|-----|-----------------------------------------------|---|-------|-------------------------------------------------------------------------------------------------------------------------------------------------------------------------------------------------------------------------------------------------------------------------------------------------------------------------------------------------------------------------------------------------------------------------------------------------------------------------------------------------------------------------------------------------------------------------------------------------------------------------------------------------------------------------------------------------------------------------------------------------------------------------------------------------------------------------------------------------------------------------------------------------------------------------------------------------------------------------------------------------------------------------------------------------------------------------------------------------------------------------------------------------------------------------------------------------------------------------------------------------------------------------------------------------------------------------------------------------------------------------------------------------------------------------------------------------------------------------------------|
| 108 | <p>2p7oA<br/>(127)</p> <p>2qh0A<br/>(129)</p> | N | 11.81 | <p>TM-align: aliSize=61 (resi) RMSD=2.29 (Å)<br/> MSGLSHTLIVKDLNKTAFLONI FNAEFLY--TFS---LSKEKFLIAGLWTCIMEG-----DS-LOErivnhiafaiqseevdevterikalgvemkpernrsvagegrsivvdfDNHLfelhagtleerlkryh-----<br/> SL-KVHHTGYAVKNDISALKKFKRL-LGYVVESevVRDevrKVYIQVINGGYRVELVAPDgedspinktkk-----GSTP-----yhicyevediqksiemsqiytlfkkaeiapaidnrkvafllfstdigli</p> <p>-----<br/> ellek</p> <p>SARST: aliSize=107 (resi) RMSD=13.76 (Å)<br/> misg---LSTLIVKDLNKTAFLONI FNAEFLY--TFS---LSKEKFLIAGLWTCIMEGDSL-----OERTYNHIAFOIQSEFvdeyTERIKALGVEMKPERPRVQ---GGRSIFYYDFNHFEH--agtleerlkryh<br/> ----sLkVHHTGYAVKNDISALKKFKRLGyveESVVRDEVKRVYIQVINGGYRVELVAPDgedspinktkkGSTPYHICYEVEDIQK----SIEEMSQIGYTLFKKAEIAPAIDNRKVAFLFSTIGIIELEK-----</p> <p>BLAST: aliSize=53 (resi) iden=22.05% (28/127) simi=41.73% (53/127)<br/> misgls-----LSTLIVKDLNKTAFLONI FNAEFLY--TFS---LSKEKFLIAGLWTCIMEG-DSLOERTYN-----HIAFOIQSEFVDEYTERIKALGVEMKPERPR---P-RVqgEGRSIY-YDFNHFEH--hagtleerlkryh<br/> -----sLkVHHTGYAVKNDISALKKFKRLGyveESVVRDEVKRVYIQVINGGYRVELVAPDgedSPINKtkkgsptpYHICYEV--DIQKSIEMSQIGYTLFKKAEIAPAIDNRKVAFLFSTIGIIELEK-----</p> <p>Proposed: aliSize=106 (resi) RMSD=2.06 (Å)<br/> MSGLSHTLIVKDLNKTAFLONI FNAEFLY--TFS---LSKEKFLIAGLWTCIME-----GD--SLO-----ertvNHIAFOIQSEFVDEYTERIKALGVEMKPERPR---vqgEGRSIFYYDFNHFEHAGtleerlkryh<br/> SL-KVHHTGYAVKNDISALKKFKRL-LGYVVESevVRDevrKVYIQVINGGYRVELVAPDgedspinktkkgsptp---YHICYEVB--DIQKSIEMSQIGYTLFKKAEIAPAID---NRKVAFLFSTIGIIELEK-----</p>                      |
| 109 | <p>2f5gA<br/>(130)</p> <p>2fyxA<br/>(130)</p> | C | 34.62 | <p>TM-align: aliSize=109 (resi) RMSD=1.55 (Å)<br/> eLSTHTKLCNYHFVWIPNHRNTLVNEIAEYTKEVKSTAEELCEI IALEVMPDHIHLFVNCPRRYAPSYLANYFKKKSARLILKKFPQNK----GKLVTRSYFAATAGNvssevikkyieeqwrkege-----<br/> -MKKGGYVVKLEYHLI WATYRHOVLVDEVADGLNDI LRDIA TQNGLELVALEVMPDYVHLLGATPOHVIPDFVKALKGASARRMFSAPHLKQphwGnLWNPSCYCLTVS-----ehtraqiqyienqhaa</p> <p>SARST: aliSize=120 (resi) RMSD=10.12 (Å)<br/> eLSTHTKLCNYHFVWIPNHRNTLVNEIAEYTKEVKSTAEELCEI IALEVMPDHIHLFVNCPRRYAPSYLANYFKKKSARLILKKFPQNK----NKLVTRSYFAATagnVSSEVIKKYIEEQW-----rkege<br/> --mKKGGYVVKLEYHLI WATYRHOVLVDEVADGLNDI LRDIA TQNGLELVALEVMPDYVHLLGATPOHVIPDFVKALKGASARRMFSAPHLKQphwGnLWNPSCYCLTVS-----VSEHTRAQIQYIENqhaa-----</p> <p>BLAST: aliSize=73 (resi) iden=37.69% (49/130) simi=56.15% (73/130)<br/> eLSTHTKLCNYHFVWIPNHRNTLVNEIAEYTKEVKSTAEELCEI IALEVMPDHIHLFVNCPRRYA-PSYLaNYFKKKSARLILKKFPQNK----GKLVTRSYFAATAGNVSSEVIKKYIEEQW-----wrkege<br/> -MKKGGYVVKLEYHLI WATYRHOVLVDEVADGLNDI LRDIA TQNGLELVALEVMPDYVHLLGATPOHVIPDFV-KALKGASARRMFSAPHLKQphwGnLWNPSCYCLTVSEHTRAQIQYIENqhaa-----</p> <p>Proposed: aliSize=125 (resi) RMSD=1.46 (Å)<br/> eLSTHTKLCNYHFVWIPNHRNTLVNEIAEYTKEVKSTAEELCEI IALEVMPDHIHLFVNCPRRYAPSYLANYFKKKSARLILKKFPQNK----GKLVTRSYFAATagnVSSEVIKKYIEEQWRKEG-e<br/> -MKKGGYVVKLEYHLI WATYRHOVLVDEVADGLNDI LRDIA TQNGLELVALEVMPDYVHLLGATPOHVIPDFVKALKGASARRMFSAPHLKQphwGnLWNPSCYCLTVS-----VSEHTRAQIQYIENqhaa-</p>                                                                                     |
| 110 | <p>2axwA<br/>(134)</p> <p>2fvnA<br/>(142)</p> | C | 79.85 | <p>TM-align: aliSize=121 (resi) RMSD=2.96 (Å)<br/> -AELHLESRGGSGTQLRDGAKVATGRIICrEAHT-GFHVWMNERQVDGRAERYVQSKDGRHEL RVRTGGDgWSPVKGEg-KGVS SRPQEEQVFFDVMADGNODIAPGEYRFSVGGACVVPQ-EKLaalehHHHH-----<br/> sAELHLESRGGSGTQLRDGAKVATGRIIC-REAHTGFHVWMNERQVDGRAERYVQSKDGRHEL RVRTGGD-GWSPVKGEg-KGVS SRPQEEQVFFDVMADGNODIAPGEYRFSVGGACVVPQeDNK-----qgf tpsgtgttkltvt</p> <p>SARST: aliSize=125 (resi) RMSD=15.50 (Å)<br/> aelhl-----ESRGGsgtqLRDGAKVATGRIICrEAHTGFHVWMNERQVDGRAERYVQSKDGRHEL RVRTGGDgWSPVKGEgKVS SRPQEEQVFFDVMAD-GNQDIAPGEYRF-----SVGGACVVPQEKLAALeHHHHH--h<br/> -----saelhlesrGSGTQ---LRDGAKVATGRIICrEAHTGFHVWMNERQVDGRAERYVQSKDGRHEL RVRTGGDgWSPVKGEgKVS SRPQEEQVFFDVMADgNQDIAPGEYRFSvgacVVPQEDNKQGFTPSGTGTTKLTVt-</p> <p>BLAST: aliSize=121 (resi) iden=90.30% (121/134) simi=90.30% (121/134)<br/> -AELHLESRGGSGTQLRDGAKVATGRIICrEAHTGFHVWMNERQVDGRAERYVQSKDGRHEL RVRTGGDgWSPVKGEgKVS SRPQEEQVFFDVMADGNODIAPGEYRFSVGGACVVPQe-----kLaalehHHHH<br/> sAELHLESRGGSGTQLRDGAKVATGRIICrEAHTGFHVWMNERQVDGRAERYVQSKDGRHEL RVRTGGDgWSPVKGEgKVS SRPQEEQVFFDVMADGNODIAPGEYRFSVGGACVVPQEdnkqgf tpsgtgttkltvt-----</p> <p>Proposed: aliSize=129 (resi) RMSD=2.54 (Å)<br/> -AELHLESRGGSGTQLRDGAKVATGRIICrEAHT-GFHVWMNERQVDGRAERYVQSKDGRHEL RVRTGd-GWSPV kgeG---KGVS SRPQEEQVFFDVMADGNODIAPGEYRFSVGGACV-----VPOEKLAALeHHHHH--<br/> sAELHLESRGGSGTQLRDGAKVATGRIIC-REAHTGFHVWMNERQVDGRAERYVQSKDGRHEL RVRTGd-GWSPV---KeggKVS SRPQEEQVFFDVMADGNODIAPGEYRFSVGGACVvpqedNKQGFTPSGTGTTKLTVt</p> |

|     |                                                     |   |       |                                                                                                                                                                                                                                                                                                                                                                                                                                                                                                                                                                                                                                                                                                                                                                                                                                                                                                                                                                                                                                                                                                                                                                                                                                                                                                                                                                                                                                                                                                                                                                                                                                                                                                                                                                                                                          |
|-----|-----------------------------------------------------|---|-------|--------------------------------------------------------------------------------------------------------------------------------------------------------------------------------------------------------------------------------------------------------------------------------------------------------------------------------------------------------------------------------------------------------------------------------------------------------------------------------------------------------------------------------------------------------------------------------------------------------------------------------------------------------------------------------------------------------------------------------------------------------------------------------------------------------------------------------------------------------------------------------------------------------------------------------------------------------------------------------------------------------------------------------------------------------------------------------------------------------------------------------------------------------------------------------------------------------------------------------------------------------------------------------------------------------------------------------------------------------------------------------------------------------------------------------------------------------------------------------------------------------------------------------------------------------------------------------------------------------------------------------------------------------------------------------------------------------------------------------------------------------------------------------------------------------------------------|
| 111 | <p>2pa7A<br/>(135)</p> <hr/> <p>lcauA<br/>(181)</p> | N | 11.11 | <p><b>TM-align:</b> aliSize=90 (resi) RMSD=2.59 (Å)<br/> enkvinfkkiidsrgslvaieenknipf-----SIKRYYIFdTKGEEPRGFIAHKKLEQVLVCLNIGSCRVIIDGNIIOEITLDSPaVGLYVGPVWHEMDFSSDCVMMVLA-----YYDetDYIRO-----Yd-Nfkkyiakindle-----<br/> -----aqnnpylfrsnkfltlfknqhgslrlqlrfnedteklendRyrvleyCSKPNLLLLPHSDSL-LVLVEGQAILVIVNPDGRDQYKLDQG-DAIKIQAGTPFYLINPNNQNLRIKfai tfrpgrtvedfflssstkr lpsylsafsknfleasydspsydeieqtllqeeqegvirkmpk-----</p> <p>afsknfleasydspsydeieqtllqeeqegvirkmpk</p> <p><b>SARST:</b> aliSize=105 (resi) RMSD=10.52 (Å)<br/> en-----KVINFKKI--IDSRGSLVAIEE--NKNIPFS--IKRYYIFdTKGEEPRGFIAHKKLEQVLVCLNIGSCRVIIDGNIIOEITLDSPaVGLYVGPVWHEMDFSSDCVMMVLA-----sdyd<br/> -----aqnnpylFRSFKFLTl fKNOHGSLRLQRfEDTEKLenlRdyrvleyCSKPNLLLLPHSDSL-LVLVEGQAILVIVNPDGRDQYKLDQG-DAIKIQAGTPFYLINPNNQNLRIKfai tfrpgrtvedfflssstkr lpsylsafsknfleasydspsydeieqtllqeeqegvirkmpk-----</p> <p>etdyirqydnfkkyiakindle</p> <p><b>BLAST:</b> aliSize=16 (resi) iden=7.41% (10/135) simi=11.85% (16/135)<br/> enkvinfkkiidsrgslvaieenknipfsikrvyyifdtkgeepgrgfahhkkle-----FOVLVCLNIGSCRVIIDGNIIOEITLDS-----<br/> -----aqnnpylfrsnkfltlfknqhgslrlqlrfnedteklendRyrvleyCSKPNLLLLPHSDSL-LVLVEGQAILVIVNPDGRDQYKLDQG-DAIKIQAGTPFYLINPNNQNLRIKfai tfrpgrtvedfflss</p> <p>-----avglyvgpavwhemhdfssdcvmmvlasdydetdyirqydnfkkyiakindle</p> <p>tkrlpsylsafsknfleasydspsydeieqtllqeeqegvirkmpk</p> <p><b>Proposed:</b> aliSize=113 (resi) RMSD=2.26 (Å)<br/> e-----NKVINFKKI--IDSRGSLVAIEE--NKNIPFS--IKRYYIFdTKGEEPRGFIAHKKLEQVLVCLNIGSCRVIIDGNIIOEITLDSPaVGLYVGPVWHEMDFSSDCVMMVLA-----YDdetDYIRO-----YdN-----<br/> -----aqnnpylFRSFKFLTl fKNOHGSLRLQRfEDTEKLenlRdyrvleyCSKPNLLLLPHSDSL-LVLVEGQAILVIVNPDGRDQYKLDQG-DAIKIQAGTPFYLINPNNQNLRIKfai tfrpgrtvedfflssstkr lpsylsafsknfleasydspsydeieqtllqeeqegvirkmpk-----</p> <p>--fkkyiakindle<br/> pk-----</p> |
| 112 | <p>2pa7A<br/>(135)</p> <hr/> <p>lznPA<br/>(140)</p> | N | 8.89  | <p><b>TM-align:</b> aliSize=96 (resi) RMSD=2.97 (Å)<br/> enkvinfkkiidsrgslvaieenknipf-----SIKRYYIFdTKGEEPRGFIAHKKLEQVLVCLNIGSCRVIIDGNIIOEITLDS-----AVGLYVGPVWHEMDFSSDCVMMVLA-----DYDETDYIROy-NFKkyiakindle-----<br/> -----dsaqaiirelglephpeggyhqtfrdkaggerGHSTAIYLL-LEKGVRSWHVVRTDAVEWHYYAGAPIALHLSQDREVTFLLGPaillegeRPOVIVPANCQSAESLGDFTLVGCTVSPGFAFSSFAEP-gWSP-----g</p> <p><b>SARST:</b> aliSize=105 (resi) RMSD=8.68 (Å)<br/> enkvinfkkiid-----SRGSLVAIEE--ENKNIPFSIKRYYIFdTKGEEPRGFIAHKKLEQVLVCLNIGSCRVIIDGNIIOEITLDS-----DSPA VGLYVGPVWHEMDFSSDCVMMVLA-----YDDETDYIRO-----YDNFKkyiakindle<br/> -----dsaqaiirelglephPEGFYHQTfrdkAGGE--RGHSTAIYLL-LEKGVRSWHVVRTDAVEWHYYAGAPIALHLSQDREVTFLLGPaillegeRPOVIVPANCQSAESLGDFTLVGCTVSPGFAFSSFAEP-gWSP-----</p> <p><b>BLAST:</b> aliSize=24 (resi) iden=11.85% (16/135) simi=17.78% (24/135)<br/> enkvinfkkiidsrgslvaieenknipfsikrvyyifdtkgeepgrgfahhkkleovlvcnlgscrviidg-nioeitldspav-----glyvgpavwhemhdf<br/> -----dsaqaiirelglephpeggyhqtfrdkaggerghstaiyylle-kGVRS--WHVVRTDAVEWHYYAGAPIALHLSQDREVTFLLGPaillegeRPOVIVPANCQSAESLGDFTLVGCTVSPGFAFSSFAEP-gWSP-----</p> <p>ssdcvmmvlasdydetdyirqydnfkkyiakindle</p> <p><b>Proposed:</b> aliSize=107 (resi) RMSD=2.17 (Å)<br/> enk-----VINFKKIidsrgslvaiee-----nknipfsikrvyyifdtkgeepgrgfahhkkleovlvcnlgscrviidg-nioeitldspav-----pAVGLYVGPVWHEMDFSSDCVMMVLA-----YDDETDYIRO-----Y-----DNFKkyiakindle<br/> -----dmsaqaiirelglePHPE--EGFYHQTfrdkaggergh-----STAIYLL-LEKGVRSWHVVRTDAVEWHYYAGAPIALHLSQDREVTFLLGPaillegeRPOVIVPANCQSAESLGDFTLVGCTVSPGFAFSSFAEP-gWSP-----</p>                                                                                                                                                                                                                                                        |
| 113 | <p>2pa7A<br/>(135)</p> <hr/> <p>l1r5A<br/>(160)</p> | N | 11.85 | <p><b>TM-align:</b> aliSize=94 (resi) RMSD=2.62 (Å)<br/> enkvinfkkiidsrgslvaieenknipf-----SIKRYYIFdTKGEEPRGFIAHKKLEQVLVCLNIGSCRVIIDGNIIOEITLDSPaVGLYVGPVWHEMDFSSDCVMMVLA-----DYDdetDYIRO---YDNFKKYiakindle-----<br/> -----scvrdnslvrdisqmpqssygieglshittvagalnhgmKEVEWlQT-ISPQRTPIHRSCEVFTV-KKKGTLMLGSSSLkypGqPQEIFPFQNTTFSIPVNDPQVWNSDEHEDLOVLVITSRPPA--KIFLYddwSMPh-TA-----avlkfpf</p> <p>vwdedcfeak</p> <p><b>SARST:</b> aliSize=85 (resi) RMSD=3.97 (Å)<br/> enkvinfkkiidsrgslvaieenknipf-----SIKRYYIFdTKGEEPRGFIAHKKLEQVLVCLNIGSCRVIIDGNIIOEITLDSPaVGLYVGPVWHEMDFSSDCVMMVLA-----SDYYD-----e<br/> -----scvrdnslvrdisqmpqssygieglshittvagalnhgmKEVEWlQTISPQRTPIHRSCEVFTV-KKKGTLMLGSSSLkypGqPQEIFPFQNTTFSIPVNDPQVWNSDEHEDLOVLVITSRPPA--KIFLYddwSMPh-TA-----avlkfpfvwdedcfeak-----</p> <p>tdyirqydnfkkyiakindle</p> <p><b>BLAST:</b> aliSize=21 (resi) iden=9.63% (13/135) simi=15.56% (21/135)<br/> enkvinfkkiidsrgslvaieen-----scvrdnslvrdisqmpqssygieglshittvagalnhgmKEVEWlqtispqrtpihrhsceevftvlkkggtllmgssslkypgqpQEIFPFQNTTFSIPVNDPQVWNSDEHEDLOVLVITSRPPA--KIFLYddwSMPh-TA-----avlkfpfvwdedcfeak-----<br/> -----scvrdnslvrdisqmpqssygieglshittvagalnhgmKEVEWlqtispqrtpihrhsceevftvlkkggtllmgssslkypgqpQEIFPFQNTTFSIPVNDPQVWNSDEHEDLOVLVITSRPPA--KIFLYddwSMPh-TA-----avlkfpfvwdedcfeak-----</p> <p>itldspavglyvgpavwhemhdfssdcvmmvlasdydetdyirqydnfkkyiakindle</p> <p><b>Proposed:</b> aliSize=119 (resi) RMSD=2.39 (Å)<br/> e-----ENKVIN--FKKI--IDSRGSLVAIEE--NKNIPFSIKRYYIFdTKGEEPRGFIAHKKLEQVLVCLNIGSCRVIIDGNIIOEITLDSPaVGLYVGPVWHEMDFSSDCVMMVLA-----DYDdetDYIRO---YDNFKK-----Yiakindle<br/> -----scvrdnslvrdisqmpqssygieglshittvagalnhgmKEVEWlQT-ISPQRTPIHRSCEVFTV-KKKGTLMLGSSSLkypgqpQEIFPFQNTTFSIPVNDPQVWNSDEHEDLOVLVITSRPPA--KIFLYddwSMPh-TA-----avlkfpfvwdedcfeak-----</p>                                 |

|     |                                       |   |       |                                                                                                                                                                                                                                                                                                                                                                                                                                                                                                                                                                                                                                                                                                                                                                                                                                                                                                                                                                                                                                                                                                                                                                                                                                                                                                                                                                                                                                                                                                                                                                                                                                                                                                                                                                                                                           |
|-----|---------------------------------------|---|-------|---------------------------------------------------------------------------------------------------------------------------------------------------------------------------------------------------------------------------------------------------------------------------------------------------------------------------------------------------------------------------------------------------------------------------------------------------------------------------------------------------------------------------------------------------------------------------------------------------------------------------------------------------------------------------------------------------------------------------------------------------------------------------------------------------------------------------------------------------------------------------------------------------------------------------------------------------------------------------------------------------------------------------------------------------------------------------------------------------------------------------------------------------------------------------------------------------------------------------------------------------------------------------------------------------------------------------------------------------------------------------------------------------------------------------------------------------------------------------------------------------------------------------------------------------------------------------------------------------------------------------------------------------------------------------------------------------------------------------------------------------------------------------------------------------------------------------|
| 114 | <p>1s60A (152)</p> <p>2i79A (171)</p> | C | 10.53 | <p><b>TM-align:</b> aliSize=138 (resi) RMSD=2.72 (Å)<br/> lvprGSHMDIROMNKTHLEHWRGLRKO-L-HPDdAHLADGEEIIOAdHLASFIAMADGVAIGFADASIRHDYVngcdsSPVVFEGFVLPSPFRORVAKOIAAVORWGTNKGCREMASDTSPE NTISOKVHOALGFEEETERVIFYRkrcc-----<br/> -----MEYELLIREAEPKDAAEVAFNLRVSLetdftsLDgDgILLT-SEEMEIFLNKQasSdNQITLLAFLNFKIAGIVNITADQRkrvRhIGDLF-----FVIGKRYWNNLGLSLEEAIEWAQASGILRLQLTVQTRQAQAVHLYKHGFVIEGSOERG----ayieegkfidvylmgkli</p> <p><b>SARST:</b> aliSize=129 (resi) RMSD=4.05 (Å)<br/> lvprgsh---MDIROMNKTHLEHWRGLRKO-L-HPDdAHLADGEEIIOAdHLASFIAMADGVAIGFADASIRHDYVngcdsSPVVFEGFVLPSPFRORVAKOIAAVORWGTNKGCREMASDTSPE NTISOKVHOALGFEEETERVIF-----fy<br/> -----meyerLLIREAEPKDAAEVAFNLRVSLetdftsLDgDgILLT-SEEMEIFLNKQASSNQITLLAFLNFKIAGIVNITADQRkrvRhIGDLF-----FVIGKRYWNNLGLSLEEAIEWAQASGILRLQLTVQTRQAQAVHLYKHGFVIEGSOERG----ayieegkfidvylmgkli--<br/> rkrcc<br/> -----</p> <p><b>BLAST:</b> aliSize=41 (resi) iden=15.13% (23/152) simi=26.97% (41/152)<br/> lvprgshmdiromnkthlehwgrlkrqlwpghpddahladgeeiloahlasfiamadgvaigf-----deEIIQADHLASFI-----AMADG--VAIGFADASIRHDYVNGCDS-SPVVFLEGIIVLPSPFRORVAKOIAAVORWGTNKGCREMASDTSPE NTISOKVHOALGF-----<br/> -----meyellireapkdAAELVAFNLRVSLetdftsLDgDgILLT-SEEMEIFLNKQASSNQITLLAFLNFKIAGIVNITADQRKRHRIGDLFIVIGKRYWNNLGLSLEEAIEWAQASGILRLQLTVQTRQAQAVHLYKHGFVIEGSOERG----ayieegkfidvylmgkli</p> <p>-----eeteVIFYRkrcc<br/> qergayieegkfidvylmgkli-----</p> <p><b>Proposed:</b> aliSize=139 (resi) RMSD=2.15 (Å)<br/> lvpr-GSHMDIROMNKTHLEHWRGLRKO-L-HPDdAHLADGEEIIOAdHLASFIAMADGVAIGFADASIRHDYVngcdsSPVVFEGFVLPSPFRORVAKOIAAVORWGTNKGCREMASDTSPE NTISOKVHOALGFEEETERVIF-----VIFYRKRCC-----c<br/> -----mEYELLIREAEPKDAAEVAFNLRVSLetdftsLDgDgILLT-SEEMEIFLNKQasSdNQITLLAFLNFKIAGIVNITADQRkrvRhIGDLF-----FVIGKRYWNNLGLSLEEAIEWAQASGILRLQLTVQTRQAQAVHLYKHGFVIEGSOERG----ayieegkfidvylmgkli</p> |
| 115 | <p>1s60A (152)</p> <p>1wwzA (157)</p> | C | 8.55  | <p><b>TM-align:</b> aliSize=136 (resi) RMSD=2.69 (Å)<br/> lvprGSHMDIROMNKTHLEHWRGLRKO-L-HPDdAHLADGEEIIOAdHLASFIAMADGVAIGFADASIRHDYVngcdsSPVVFLEGIIVLPSPFRORVAKOIAAVORWGTNKGCREMASDTSPE NTISOKVHOALGFEEETERVIFYRkrcc-----<br/> -----MDEIKLEKLLKIDKKAENELIDVYMSGYEgYegleeyGGEGRVYARNYIKWCW-KK-ASdGFVAKVGDKIIVGIVCDKDFWFSKY--E-GRIVGAIHEFVVDKKFOGKIGRKLITCLDFLGK-YNDTIELWVGEKYGAMNLYEKFGEKK-VGKSG----iwwrmikrq</p> <p><b>SARST:</b> aliSize=139 (resi) RMSD=4.60 (Å)<br/> lvprgshMDIROMNKTHLEHWRGLRKO-L-HPDdAHLADGEEIIOAdHLASFIAMADGVAIGFADASIRHDYVngcdsSPVVFLEGIIVLPSPFRORVAKOIAAVORWGTNKGCREMASDTSPE NTISOKVHOALGFEEETERVIF-----IFYRKR---rc<br/> -----mDEIKLEKLLKIDKKAENELIDVYMSGYEgYegleeyGGEGRVYARNYIKWCWKKASDGFVAKVGDKIIVGIVCDKDFWFSKY--E-GRIVGAIHEFVVDKKFOGKIGRKLITCLDFLGK-YNDTIELWVGEKYGAMNLYEKFGEKKVGSgiwwrmikrq--</p> <p><b>BLAST:</b> aliSize=37 (resi) iden=14.47% (22/152) simi=24.34% (37/152)<br/> lvprgshmdiromnkthlehwgrlkrqlwpghpddahladgeeiloahlasfiamadgvaigf-----GADNSIRHYVNGCDS-SPVVFLEGIIVLPSPFRORVAKOIAAVORWGTNKGCREMASDTSPE NTISOKVHOALGFEEETERVIF-----<br/> -----mdeikiekllkldkkaenelidvymsgyegleeyggegrdyarnyikcwkkasdgfVAKVGDKIIVGIVCDKDFWFSKY--E-GRIVGAIHEFVVDKKFOGKIGRKLITCLDFLGK-YNDTIELWVGEKYGAMNLYEKFGEKKVGSgiwwrmikrq--</p> <p>SPENTISOKVHOALGFEE-----terVIFYRkrcc<br/> GEKNYGAMNLYEKFGEKKVGSgiwwrmikrq-----</p> <p><b>Proposed:</b> aliSize=139 (resi) RMSD=2.37 (Å)<br/> lvprGSHMDIROMNKTHLEHWRGLRKO-L-HPDdAHLADGEEIIOAdHLASFIAMADGVAIGFADASIRHDYVngcdsSPVVFLEGIIVLPSPFRORVAKOIAAVORWGTNKGCREMASDTSPE NTISOKVHOALGFEEETERVIF-----IFYRKRCC-----c<br/> -----MDEIKLEKLLKIDKKAENELIDVYMSGYEgYegleeyGGEGRVYARNYIKWCWKK-ASdGFVAKVGDKIIVGIVCDKDFWFSKY--E-GRIVGAIHEFVVDKKFOGKIGRKLITCLDFLGK-YNDTIELWVGEKYGAMNLYEKFGEKKVGSgiwwrmikrq--</p>                                                         |
| 116 | <p>1s60A (152)</p> <p>2cmmA (151)</p> | C | 14.57 | <p><b>TM-align:</b> aliSize=127 (resi) RMSD=2.27 (Å)<br/> lvprgshMDIROMNKTHLEHWRGLRKO-L-HPDdAHLADGEEIIOAdHLASFIAMADGVAIGFADASIRHDYVngcdsSPVVFEGFVLPSPFRORVAKOIAAVORWGTNKGCREMASDTSPE NTISOKVHOALGFEEETERVIFYRkrcc-----<br/> -----MNTSILSTIDLPAAWQIEORAHAFPWSE-KTFF-G--NQ-GE-RYLNKLTADDRMAAFATQVVL-----DEATFNIAADDFORRGLGRMLEHLIDELETRVVTWLEVRASNAATAIYESLGFNEATIRRNYYptagghedaaimalpismklh</p> <p><b>SARST:</b> aliSize=122 (resi) RMSD=2.93 (Å)<br/> lvprgshMDIROMNKTHLEHWRGLRKO-L-HPDdAHLADGEEIIOAdHLASFIAMADGVAIGFADASIRHDYVngcdsSPVVFEGFVLPSPFRORVAKOIAAVORWGTNKGCREMASDTSPE NTISOKVHOALGFEEETERVIF-----fykrcc<br/> -----MNTSILSTIDLPAAWQIEORAHAFPWSEKTFF-----GNqgerYLNKLTADDRMAAFATQVVL-----EATFNIAADDFORRGLGRMLEHLIDELETRVVTWLEVRASNAATAIYESLGFNEATIRRNYYptagghedaaimalpismklh-----</p> <p><b>BLAST:</b> aliSize=43 (resi) iden=15.89% (24/151) simi=28.48% (43/151)<br/> lvprgshmdiromnkthlehwgrlkrqlwpghpddahladgeeiloahlasfiamadgvaigf-----ADHLASFIAMADGVAIGFADASIRHDYVngcdsSPVVFEGFVLPSPFRORVAKOIAAVORWGTNKGCREMASDTSPE NTISOKVHOALGFEEETERVIF-----<br/> -----mntsilstidlpaawqieqrahafpwektffgnqGERYLNKLTADDRMAAFATQVVL-----EATFNIAADDFORRGLGRMLEHLIDELETRVVTWLEVRASNAATAIYESLGFNEATIRRNYYptagghedaaimalpismklh</p> <p>-----rkrcc<br/> hedaiimalpismklh-----</p> <p><b>Proposed:</b> aliSize=131 (resi) RMSD=1.97 (Å)<br/> lvprgshMDIROMNKTHLEHWRGLRKO-L-HPDdAHLADGEEIIOAdHLASFIAMADGVAIGFADASIRHDYVngcdsSPVVFEGFVLPSPFRORVAKOIAAVORWGTNKGCREMASDTSPE NTISOKVHOALGFEEETERVIF-----IFYRKRCC-----c<br/> -----MNTSILSTIDLPAAWQIEORAHAFPWSEKTFFGN--Q-GE-RYLNKLTADDRMAAFATQVVL-----DEATFNIAADDFORRGLGRMLEHLIDELETRVVTWLEVRASNAATAIYESLGFNEATIRRNYYptagghedaaimalpismklh</p>                                                                                                                                           |

|     |                                       |   |                                                                                                                                                                                                                                                                                                                                                                                                                                                                                                                                                                                                                                                                                                                                                                                                                                                                                                                                                                                                                                                                                                                                                                                                                                                                                                                                                                                                                                                                                                                                                                                                                                                                                                                                                                                                                                                                                                                                                                                                                                                                                                |
|-----|---------------------------------------|---|------------------------------------------------------------------------------------------------------------------------------------------------------------------------------------------------------------------------------------------------------------------------------------------------------------------------------------------------------------------------------------------------------------------------------------------------------------------------------------------------------------------------------------------------------------------------------------------------------------------------------------------------------------------------------------------------------------------------------------------------------------------------------------------------------------------------------------------------------------------------------------------------------------------------------------------------------------------------------------------------------------------------------------------------------------------------------------------------------------------------------------------------------------------------------------------------------------------------------------------------------------------------------------------------------------------------------------------------------------------------------------------------------------------------------------------------------------------------------------------------------------------------------------------------------------------------------------------------------------------------------------------------------------------------------------------------------------------------------------------------------------------------------------------------------------------------------------------------------------------------------------------------------------------------------------------------------------------------------------------------------------------------------------------------------------------------------------------------|
| 117 | <p>1s60A (152)</p> <p>1wk4A (174)</p> | C | <p>17.11</p> <p><b>TM-align:</b> aliSize=137 (resi) RMSD=2.04 (Å)<br/> lvprgshMDIROMNKTHLEHWRGLRKO-LW-----P-HPDDAHLADGEEIIOA--DHLASFIAMAD-GVAIGFADASIRhDYVNgCDSSpVVFEGIFVLPSPFRORVAKOLI AAVORWGTNKGCREMASDTSPE NTI SOKVHOALGFEETERVIFyrkrc-----<br/> -----VRLRRAGLEDIPGVARVLDVtWRatyrgvvpeafLeLSYEGQAERWAQRKTptWPGRLEVAESESSEVVGFVAFGPD-RASG-FPGY-TAEWAIVYVLP-TWQRKLGRAIFHEGALLQAEYGR-LVWVLEKPKGRGFYEHGVLGGERIE---lggaklwevaygfdl gghkw</p> <p><b>SARST:</b> aliSize=136 (resi) RMSD=4.51 (Å)<br/> lvprgshMDIROMNKTHLEHWRGLRKO-LW-----KOLWPGHPDDAHLADGEEIIOA--DHLASFIAMAD-GVAIGFADASIRhDYVNgCDSSpVVFEGIFVLPSPFRORVAKOLI AAVORWGTNKGCREMASDTSPE NTI SOKVHOALGFEETERVIFYR-----krc<br/> -----VRLRRAGLEDIPGVARVLDVtWRATYRGVVLEAFLEglsyegQAEERWAQRKtPTWpGRLEVAESESSEVVGFVAFGPD-RASGFPYTAE---EWAIVYVLP-TWQRKLGRAIFHEGALLQAEYGR-LVWVLEKPKGRGFYEHGVLGGERIElggaklwevaygfdl gghkw---</p> <p><b>BLAST:</b> aliSize=40 (resi) iden=13.82% (21/152) simi=26.32% (40/152)<br/> lvprgshMDIROMNKTHLEHWRGLRKO-LW-----P-HPDDAHLADGEEIIOA--DHLASFIAMAD-GVAIGFADASIRhDYVNgCDSSpVVFEGIFVLPSPFRORVAKOLI AAVORWGTNKGCREMASDTSPE NTI SOKVHOALGFEETERVIFYR-----krc<br/> -----VRLRRAGLEDIPGVARVLDVtWRATYRGVVLEAFLEglsyegQAEERWAQRKtPTWpGRLEVAESESSEVVGFVAFGPD-RASGFPYTAE---EWAIVYVLP-TWQRKLGRAIFHEGALLQAEYGR-LVWVLEKPKGRGFYEHGVLGGERIElggaklwevaygfdl gghkw---</p> <p>SOKVHOALGFEETERVIFyrkrc<br/> GRGFYEHGVLGGERIElggaklwevaygfdl gghkw-----</p> <p><b>Proposed:</b> aliSize=142 (resi) RMSD=1.87 (Å)<br/> lvprgshMDIROMNKTHLEHWRGLRKO-LW-----P-HPDDAHLADGEEIIOA--DHLASFIAMAD-GVAIGFADASIRhDYVNgCDSSpVVFEGIFVLPSPFRORVAKOLI AAVORWGTNKGCREMASDTSPE NTI SOKVHOALGFEETERVIFYR-----FIRKR---C--c<br/> -----VRLRRAGLEDIPGVARVLDVtWRATYRGVVLEAFLEglsyegQAEERWAQRKtPTWpGRLEVAESESSEVVGFVAFGPD-RASGFPYTAE---EWAIVYVLP-TWQRKLGRAIFHEGALLQAEYGR-LVWVLEKPKGRGFYEHGVLGGERIElggaklwevaygfdl gghkw---</p>                                                                                                                                                                                                                             |
| 118 | <p>1s60A (152)</p> <p>1gheA (170)</p> | C | <p>15.13</p> <p><b>TM-align:</b> aliSize=131 (resi) RMSD=2.38 (Å)<br/> lvprgshMDIROMN---K-TLLEHWRGLRKO-LW-----WP-GH-PDDAHLADGEEIIOADH--ASFIAMADG-VATIGFADASIRhDYVngcd--SSPVVLEGI fVLPSPFRORVAKOLI AAVORWGTNKGCREMASDTSPE NTI SOKVHOALGFEETERVIFYRkrc-----<br/> -----AQLRRVTaesFahYRHGLAQLFETVhggasvgAdLdQqAYWCDGLKADIAAGSLLWVVAE-DdNVLASQSLCQK-----pnGLNRAEVQKL-VLPSARGRGLGROL-DEVEQVAVKHKRGLLHLDTEAGSVAAAFYS-LAYTRVGEIpgycatpdgrlhptaiyftl</p> <p><b>SARST:</b> aliSize=136 (resi) RMSD=6.28 (Å)<br/> lvprgshMDIROMN---K-TLLEHWRGLRKO-LW-----WRGLRKOLWP--HP-----DHLADGEEIIOADH--ASFIAMADG-VATIGFADASIRhDYVngcdSSPVVleGI fVLPSPFRORVAKOLI AAVORWGTNKGCREMASDTSPE NTI SOKVHOALGFEETERVIFYR---c<br/> -----AQLRRVTaesFahYRHGLAQLFETVhggasvgAdLdQqAYWCDGLKADIAAGSLLWVVAE-DdNVLASQSLCQKPNGL-NRAE---QKLVPSARGRGL-GROLDEVEQVAVKHKRGLLHLDTEAGSVAAAFYS-LAYTRVGEIpgycatpdgrlhptaiyftl-</p> <p><b>BLAST:</b> aliSize=45 (resi) iden=17.76% (27/152) simi=29.61% (45/152)<br/> lvprgshMDIROMN---K-TLLEHWRGLRKO-LW-----WP-GH-PDDAHLADGEEIIOADH--ASFIAMADG-VATIGFADASIRhDYVngcdSSPVVleGI fVLPSPFRORVAKOLI AAVORWGTNKGCREMASDTSPE NTI SOKVHOALGFEETERVIFYR---c<br/> -----AQLRRVTaesFahYRHGLAQLFETVhggasvgAdLdQqAYWCDGLKADIAAGSLLWVVAE-DdNVLASQSLCQKPNGL-NRAE---QKLVPSARGRGL-GROLDEVEQVAVKHKRGLLHLDTEAGSVAAAFYS-LAYTRVGEIpgycatpdgrlhptaiyftl-</p> <p>-----eeterVIFyrkrc<br/> elpgycatpdgrlhptaiyftl-----</p> <p><b>Proposed:</b> aliSize=136 (resi) RMSD=1.96 (Å)<br/> lvprgshMDIROMN---K-TLLEHWRGLRKO-LW-----PG--H---PDDAHLADGEEIIOADH--ASFIAMADG-VATIGFADASIRH--DyngcdsSPVVLEGI fVLPSPFRORVAKOLI AAVORWGTNKGCREMASDTSPE NTI SOKVHOALGFEETERVIFYR---c<br/> -----AQLRRVTaesFahYRHGLAQLFETVhggasvgFmadLmqQAYWCDGLKADIAAGSLLWVVAE-DdNVLASQSLCQKPNGL-NRAE---QKLVPSARGRGL-GROLDEVEQVAVKHKRGLLHLDTEAGSVAAAFYS-LAYTRVGEIpgycatpdgrlhptaiyftl-</p>                                                                                                                                                                                                                                                                   |
| 119 | <p>1s60A (152)</p> <p>1u6mA (189)</p> | C | <p>13.16</p> <p><b>TM-align:</b> aliSize=135 (resi) RMSD=2.89 (Å)<br/> lvprgshMDIROMN---THLEHWRGLRKO-LW---G--H-----PD--AHLADGEEIIOADH--LASFIAMADGVAIGFADASIRH-----YNgCdsSPVVLEGI fVLPSPFRORVAKOLI AAVORWGTNKGCREMASDTSPE NTI SOKVHOALGFEETERVIFYRkrc-----<br/> -----SLRSATLEDGQAIARVLVILKdmeLpileevseeqMILLAEATAY--PTyrygYQRI LVYEHA--EVAIIVGYPAEdekiideplrevfkkhglaedvrlfieeETL-P--N-EWYLDTSVDERFRGMIGSKLLDALPEVAKASQKQALGLNVDFDNPARKLYASKGFKDVTMTIS</p> <p>rkr-----<br/> ---ghlynhmqkeve</p> <p><b>SARST:</b> aliSize=138 (resi) RMSD=5.87 (Å)<br/> lvprgshMDIROMN---THLEHWRGLRKO-LW---G--H-----HPDDAHLADGEEIIOADH--LASFIAMADGVAIGFADASIRH-----YNgCdsSPVVLEGI fVLPSPFRORVAKOLI AAVORWGTNKGCREMASDTSPE NTI SOKVHOALGFEETERVIFYR-----<br/> -----SLRSATLEDGQAIARVLVILKdmeLpileevseeqMILLAEATAY--PTyrygYQRI LVYEHA--EVAIIVGYPAEdekiideplrevfkkhglaedvrlfieeETL-P--N-EWYLDTSVDERFRGMIGSKLLDALPEVAKASQKQALGLNVDFDNPARKLYASKGFKDVTMTISghly</p> <p>-----yrkrc<br/> nhmqkev-----</p> <p><b>BLAST:</b> aliSize=16 (resi) iden=6.58% (10/152) simi=10.53% (16/152)<br/> lvprgshMDIROMN---THLEHWRGLRKO-LW---G--H-----PD--AHLADGEEIIOADH--LASFIAMADGVAIGFADASIRH-----YNgCdsSPVVLEGI fVLPSPFRORVAKOLI AAVORWGTNKGCREMASDTSPE NTI SOKVHOALGFEETERVIFYRkrc-----<br/> -----SLRSATLEDGQAIARVLVILKdmeLpileevseeqMILLAEATAY--PTyrygYQRI LVYEHA--EVAIIVGYPAEdekiideplrevfkkhglaedvrlfieeETL-P--N-EWYLDTSVDERFRGMIGSKLLDALPEVAKASQKQALGLNVDFDNPARKLYASKGFKDVTMTIS</p> <p>-----fadasi rhdyngcdsSPVVleGI fVLPSPFRORVAKOLI AAVORWGTNKGCREMASDTSPE NTI SOKVHOALGFEETERVIFYRkrc<br/> klyaskgfkdvttmTISghlynhmqkev-----</p> <p><b>Proposed:</b> aliSize=134 (resi) RMSD=2.27 (Å)<br/> lvprgshMDIROMN---THLEHWRGLRKO-LW---G--H-----PD--AHLADGEEIIOADH--LASFIAMADGVAIGFADASIRH-----YNgCdsSPVVLEGI fVLPSPFRORVAKOLI AAVORWGTNKGCREMASDTSPE NTI SOKVHOALGFEETERVIFYRkrc-----<br/> -----SLRSATLEDGQAIARVLVILKdmeLpileevseeqMILLAEATAY--PTyrygYQRI LVYEHA--EVAIIVGYPAEdekiideplrevfkkhglaedvrlfieeETL-P--N-EWYLDTSVDERFRGMIGSKLLDALPEVAKASQKQALGLNVDFDNPARKLYASKGFKDVTMTISghly</p> <p>RV---FYRRC---c<br/> MTISghlynhmqkeve</p> |



|     |                                       |   |       |                                                                                                                                                                                                                                                                                                                                                                                                                                                                                                                                                                                                                                                                                                                                                                                                                                                                                                                                                                                                                                                                                                                                                                                                                                                                                                                                                                                                                                                                                                                                                                                                                                                                                                                                                                                                                                                       |
|-----|---------------------------------------|---|-------|-------------------------------------------------------------------------------------------------------------------------------------------------------------------------------------------------------------------------------------------------------------------------------------------------------------------------------------------------------------------------------------------------------------------------------------------------------------------------------------------------------------------------------------------------------------------------------------------------------------------------------------------------------------------------------------------------------------------------------------------------------------------------------------------------------------------------------------------------------------------------------------------------------------------------------------------------------------------------------------------------------------------------------------------------------------------------------------------------------------------------------------------------------------------------------------------------------------------------------------------------------------------------------------------------------------------------------------------------------------------------------------------------------------------------------------------------------------------------------------------------------------------------------------------------------------------------------------------------------------------------------------------------------------------------------------------------------------------------------------------------------------------------------------------------------------------------------------------------------|
| 120 | <p>1s60A (152)</p> <p>2r7hA (157)</p> | C | 15.13 | <p><b>TM-align:</b> aliSize=136 (resi) RMSD=2.57 (Å)<br/> lvprgshMDIROMNK-THLEHWGLRK-Q-LWPGHPD AHLADGEEILOADHLASFIAMADGVAIGFADASIRHDYVNGCDSSPVVFLGEGIFVLSFRORVAKOIAAVORWGTNKGCREMASDTSPE--NTISOKVHOALGFEETERVIFYRkr-----<br/> -----AVAFRQVLPQDALLVRRVVEStgFFTPEEAQVLAQELVDEHhHACGYHFVFAEDDD-ACYCYGTPA-----TEGTYDYWIAAAPHROHSLGRALLAEVVDVRLTGGRLFAETSgIRKYAPTRRFYERAGFSAEAVLkaFYR--agddkiiyrleva</p> <p><b>SARST:</b> aliSize=131 (resi) RMSD=3.96 (Å)<br/> lvprgs-HMDIROMNKTHLEHWGL--RKOLWpghPDAHLADGEEILOADHLASFIAMADGVAIGFADASIRHDYVNGCDSSPVVFLGEGIFVLSFRORVAKOIAAVORWGTNKGCREMASDTS--SPENTISOKVHOALGFEETERVIF-----fyrkrc<br/> -----aVAFRQVLPQDALLVRRVVEStGFF---TPEEADVAQELVDEHhHACGYHFVFAEDDDAACYCYG---PTPA---TEGTYDYWIAAAPHROHSLGRALLAEVVDVRLTGGRLFAETSgIRKYAPTRRFYERAGFSAEAVLkaFYragddkiiyrleva-----</p> <p><b>BLAST:</b> aliSize=54 (resi) iden=21.71% (33/152) simi=35.53% (54/152)<br/> lvprgshmdi rqnkthlehwgrl rklwpgh-----pddahladgeeilo adhl asfi amad gva igf adas irhd yvngcd sspv vfl geg if vl sfror vak o ia avor wgt nk gcre masd ts --pent isokv hoal gfe eter v if yr ----<br/> -----avafrrqvlpqdal lvr rvest gfft ee ad va --oelvd -eh-----h acy hfv fa tedddag y --ac -y gtpate g tydlyw iaa aphro hslgr all ae vhdvrlt ggr llfaets g irky aptrrf yera g f saeavl ka f yr agdd k ii yr le va</p> <p>-----krc<br/> kiiyrleva---</p> <p><b>Proposed:</b> aliSize=138 (resi) RMSD=2.18 (Å)<br/> lvprgshMDIROMNK-THLEHWGLRK-Q-LWPGH--PddAHLADGEEILOADHLASFIAMADGVAIGFADASIRHDYVNGCDSSPVVFLGEGIFVLSFRORVAKOIAAVORWGTNKGCREMASDTSPE-NTISOKVHOALGFEETERVIF-----FYRKRc-----c<br/> -----AVAFRQVLPQDALLVRRVVEStgFFTPEeaD--VAQELVDEHhHACGYHFVFAEDDDMAACYCYGTPA-----TEGTYDYWIAAAPHROHSLGRALLAEVVDVRLTGGRLFAETSgIRKYAPTRRFYERAGFSAEAVLkaFYragdDKIIYRleva-</p>                                                                                |
| 121 | <p>1s60A (152)</p> <p>lyr0A (163)</p> | C | 17.11 | <p><b>TM-align:</b> aliSize=133 (resi) RMSD=2.47 (Å)<br/> lvprgshMDIROMNKTHLEHWGLRKOLWP-----GHPDahLADGEEILOADHLASFIAMADGVAIGFADASIRHDYVNGCDSSPVVFLGEGIFVLSFRORVAKOIAAVORWGTNKGCREMASDTSPE--NTISOKVHOALGFEETERVIFYRkr-----<br/> -----SVELRDATVDDLSGIEIYNDAVNTtaiwnEVVV--LENRKDWFAArSRGFPVIVAILDCKVAGYASYGDWRaf-----dgyRHTRH-SVYHKDARGHGIGRQL-QALIDHAGGNDVHVLIAAIEAENTASIRLHESLGRVVGfSvgtkfgrwldlcelkl</p> <p><b>SARST:</b> aliSize=133 (resi) RMSD=4.36 (Å)<br/> lvprgsh-MDIROMNKTHLEHWGLRKOLWP-----GHPDahLADGEEILOADHLASFIAMADGVAIGFADASIRHDYVNGCDSSPVVFLGEGIFVLSFRORVAKOIAAVORWGTNKGCREMASDTSPE--NTISOKVHOALGFEETERVIF-----fyrkrc<br/> -----sVELRDATVDDLSGIEIYNDAVNTTAIwneVVVDLENRKDWFAArTS-RGFPVIVAILDCKVAGYASYG---DWRafDgyRHTRHsvyHKDARGHGIGRQL-QALIDHAGGNDVHVLIAAIEAENTASIRLHESLGRVVGfSvgtkfgrwldlcelkl-----</p> <p><b>BLAST:</b> aliSize=39 (resi) iden=15.79% (24/152) simi=25.66% (39/152)<br/> lvprgshmdi rqnkthlehwgrl rklwpghpddahladgee ilqadhlasf-----I AMADGVAIGFADASIRHDYVNGCDSSPVVFLGEGIFVLSFRORVAKOIAAVORWGTNKGCREMASDTSPE--NTISOKVHOALGFEETERVIFYRkr-----<br/> -----sveldatvddlsgieiyndavnttaiwnevvvdlenrkdwfaartsrgfpvivailldckvagyasyg---dw-rafDgyRHTRHsvyHKDARGHGIGRQL-QALIDHAGGNDVHVLIAAIEAENTASIRLHESLGRVVGfSvgtkfgrwldlcelkl</p> <p>LGFEETERVIFYRkr-----<br/> LGFRVVGfsvgtkfgrwldlcelkl-----</p> <p><b>Proposed:</b> aliSize=137 (resi) RMSD=2.04 (Å)<br/> lvprgshMDIROMNKTHLEHWGLRKOLWP-----GHPDahLADGEEILOADHLASFIAMADGVAIGFADASIRHDYVNGCDSSPVVFLGEGIFVLSFRORVAKOIAAVORWGTNKGCREMASDTSPE--NTISOKVHOALGFEETERVIF-----FYRKRc-----c<br/> -----SVELRDATVDDLSGIEIYNDAVNTtaiwnEVVV--LENRKDWFAArSRGFPVIVAILDCKVAGYASYGDWRafDgy-----RHTRH-SVYHKDARGHGIGRQL-QALIDHAGGNDVHVLIAAIEAENTASIRLHESLGRVVGfSvgtkfgrwldlcelkl</p>                                                                                                              |
| 122 | <p>1s60A (152)</p> <p>2fiaA (157)</p> | C | 13.16 | <p><b>TM-align:</b> aliSize=129 (resi) RMSD=2.75 (Å)<br/> lvprgshMDIROMNKTHLEHWGLRK-QL-----PQHPDahLADGEEILOADHLASFIAMADGVAIGFADASIRHDYVNGCDSSPVVFLGEGIFVLSFRORVAKOIAAVORWGTNKGCREMASDTSPE--NTISOKVHOALGFEETERVIFYRkr-----<br/> -----MKIRVADEKELPMILOFLTeVKaymdvvgitgTKDYP-SQ-GDIQEDITK--KRLYLLVHEEMIFSMATFCMEQ-----eQDFVWKRFAATSNYIAKCYGSLFHELEKRAVWEGRRKIYAQNHTNHRMIRFPES-KGFTKIHESLQmnrldfgsflyvkele</p> <p><b>SARST:</b> aliSize=124 (resi) RMSD=6.15 (Å)<br/> lvprgshmd--ROMNKTHLEHWGLRKqlwpghpDDAHLA-----DGEILOADHLASFIAMADGVAIGFADASIRHDYVNGCDSSPVVFLGEGIFVLSFRORVAKOIAAVORWGTNKGCREMASDTSPE--NTISOKVHOALGFEETERVIF-----yrkrc<br/> -----mkIRVADEKELPMILOFLT-----EVKAYMDvvgitgwtkdypsQDIIQEDITKKRLYLLVHEEMIFSM---ATFCMEQEQDFVWKRFAATSNYIAKCYGSLFHELEKRAVWEGRRKIYAQNHTNHRMIRFPES-KGFTKIHESLQmnrldfgsflyvkele-----</p> <p><b>BLAST:</b> aliSize=34 (resi) iden=11.18% (17/152) simi=22.37% (34/152)<br/> lvprgshmdi rqnkthlehwgrl rklwpghpddahladgee ilqadhlasfi amad gva igf adas irhd yvngcd sspv -----v fleg if vl sfror vak o ia avor wgt nk gcre masd ts --pent isokv hoal gfe eter v if yr ----<br/> -----mkirvadekelpmilqfltevkaymdvvgitgwtkdyps qgd i qedi t kkrly llv heemi fsm at fcmee qdf -----v fleg if vl sfror vak o ia avor wgt nk gcre masd ts --pent isokv hoal gfe eter v if yr ----</p> <p>CREMASDTSPE--NTISOKVHOALGFEETERVIF-----rkrc<br/> RRKIYAQNHTNHRMIRFPES-KGFTKIHESLQmnrldfgsflyvkele-----</p> <p><b>Proposed:</b> aliSize=129 (resi) RMSD=2.25 (Å)<br/> lvprgshMDIROMNKTHLEHWGLRK-QL-----PQHPDahLADGEEILOADHLASFIAMADGVAIGFADASIRHDYVNGCDSSPVVFLGEGIFVLSFRORVAKOIAAVORWGTNKGCREMASDTSPE--NTISOKVHOALGFEETERVIF-----FYRKRc-----c<br/> -----MKIRVADEKELPMILOFLTeVKaymdvvgitgTKDyp--SQ-GDIQEDITK--KRLYLLVHEEMIFSMATFCMEQe-----QDFVWKRFAATSNYIAKCYGSLFHELEKRAVWEGRRKIYAQNHTNHRMIRFPES-KGFTKIHESLQmnrldfgsflyvkele-----</p> |

|     |                                             |   |       |                                                                                                                                                                                                                                                                                                                                                                                                                                                                                                                                                                                                                                                                                                                                                                                                                                                                                                                                                                                                                                                                                                                                                                                                                                                                                                                                                                                                                                                                                                                                                                                                                                                                                                                                                                                                       |
|-----|---------------------------------------------|---|-------|-------------------------------------------------------------------------------------------------------------------------------------------------------------------------------------------------------------------------------------------------------------------------------------------------------------------------------------------------------------------------------------------------------------------------------------------------------------------------------------------------------------------------------------------------------------------------------------------------------------------------------------------------------------------------------------------------------------------------------------------------------------------------------------------------------------------------------------------------------------------------------------------------------------------------------------------------------------------------------------------------------------------------------------------------------------------------------------------------------------------------------------------------------------------------------------------------------------------------------------------------------------------------------------------------------------------------------------------------------------------------------------------------------------------------------------------------------------------------------------------------------------------------------------------------------------------------------------------------------------------------------------------------------------------------------------------------------------------------------------------------------------------------------------------------------|
| 123 | <p>1s60A (152)</p> <hr/> <p>1cm0B (161)</p> | C | 7.89  | <p><b>TM-align:</b> aliSize=125 (resi) RMSD=2.76 (Å)<br/> lvprgSHMDIROMN-----K-T-H-EHWRGLRKO-LW-PGHPDdAHlADGEEi lqAdhLASFIAmADGVAIGFADASTRHdyvngcdsSPVVFLEGIFFLPSFRORVAKOLI AAVORWGTNKGCREMASDTSpeNt iSOKVHOALGFEEF Eryi-----FYRkrc-----<br/> -----KVIEFHVVGnslnqkpnkklmWVGLQNVFShqLPrMPKEY-IT-RLVFDp--K--HKTLALIKDGRVIGICFRMFPS-----OGFTEIVFCAVTSNEQVKYGTLMNHLKEYHIKHDILNFLTAYAD--E-YAIGYFKKQGF SKEI---kipktyvgyikdyE---gatlmgcelnp</p> <p><b>SARST:</b> aliSize=112 (resi) RMSD=3.24 (Å)<br/> lvprgshmdirqmnn-----KTH-EHWRGLRKO-LW-PGHPDdAHlADGEEi lQADHLASFIAmADGVAIGFADASTRHdyvngcdsspVVFLEGIFFLPSFRORVAKOLI AAVORWGTNKGCREMASDTSPEnt iSOKVHOALGFEE-----e<br/> -----kviefhvvgnslnqkpnkklmWVGLQNVFShqLPrMPKEYITRL---VFDPKHKTALIKDGRVIGICFRMFPS--OC-----FTEIVFCAVTSNEQVKYGTLMNHLKEYHIKHDILNFLTAYADEY--AIGYFKKQGF SKEIkipktyvgyikdyegatlmgcelnp-</p> <p>ervifyrkr<br/> -----</p> <p><b>BLAST:</b> aliSize=16 (resi) iden=6.58% (10/152) simi=10.53% (16/152)<br/> lvprgshmdirqmknthlehwrglrkqlwpghpdda-----ADGEEILOADH--LASFIAmADGVAIGF-----A-----<br/> -----kviefhvvgnslnqkpnkklmWVGLQNVFshqLprmpkeyitrlvfdpkhktlalikdgrvigicfrmfpsqgfteivfcavtsneqvkygtLMNHLKEYHIKHDILNFLTAYADEYAIgyfkkqg SKEIkipktyvgyikdyegatlmgcelnp</p> <p>-----dasirhdyvngcdsspvvflegifvlpsfrqrgvakqliaavqrgwtngkcremasdtspeNt iSOKVHOALGFEEF Eryi-----FYRkrc-----<br/> mgcelnp-----</p> <p><b>Proposed:</b> aliSize=130 (resi) RMSD=2.12 (Å)<br/> lvprgSHMDIROMN-----KT-H-EHWRGLRKO-LW-PGHPDdAHlADGEEi lQADHLASFIAmADGVAIGFADASTRHdyvngcdsSPVVFLEGIFFLPSFRORVAKOLI AAVORWGTNKGCREMASDTSpeNt iSOKVHOALGFEEF Eryi-----FYRkrc-----c<br/> -----KVIEFHVVGnslnqkpnkklmWVGLQNVFShqLPrMPKEY-ITRLVFDp--PK--HKTLALIKDGRVIGICFRMFPS-----OGFTEIVFCAVTSNEQVKYGTLMNHLKEYHIKHDILNFLTAYAD--E-YAIGYFKKQGF SKEIkipktyvgyikdyegATLMGCELNPc-</p> |
| 124 | <p>1s60A (152)</p> <hr/> <p>1mk4A (157)</p> | C | 19.74 | <p><b>TM-align:</b> aliSize=132 (resi) RMSD=2.67 (Å)<br/> lvprgsHMDIROMNKTHLHWRGLRKL-QL---WPGHPddaHlADGEEi lQADHLASFIAmADGVAIGFADASTRHdyvngcdsSPVVFLEGIFFLPSFRORVAKOLI AAVORWGTNKGCREMASDTSPEnt iSOKVHOALGFEEF Eryi-----RVI-FYRkrc-----<br/> -----HMDIRITSSDYEMVTSVLNwWggrQLKEK---L--PR-LFFEHFQDTSFITSEHNSMTGELIGFQSQS-----PETAYIHFSGVHPDFRKMQIGKQLYDVFIE TVKQRCCTRVKCVTSPVNVKVS IAYITKLGFDIEKgtktvngisvfanYDGP--gqdrvlfvkni</p> <p><b>SARST:</b> aliSize=126 (resi) RMSD=5.15 (Å)<br/> lvprgshMDIROMNKTHLHWRGLRKL-QL---WPGHPddaHlADGEEi lQADHLASFIAmADGVAIGFADASTRHdyvngcdsSPVVFLEGIFFLPSFRORVAKOLI AAVORWGTNKGCREMASDTSPEnt iSOKVHOALGFEEF Eryi-----RVI-FYRkrc-----rc<br/> -----hMDIRITSSDYEMVTSVLNwWggrQLKEK---L--PR-LFFEHFQDTSFITSEHNSMTGELIGFQSQS-----SDPETAYIHFSGVHPDFRKMQIGKQLYDVFIE TVKQRCCTRVKCVTSPVNVKVS IAYITKLGFDIEKgtktvngisvfanYDGPgqdrvlfvkni--</p> <p><b>BLAST:</b> aliSize=54 (resi) iden=23.68% (36/152) simi=35.53% (54/152)<br/> lvprgsHMDIROMNKTHLHWRGLRKL-QL---WPGHPddaHlADGEEi lQADHLASFIAmADGVAIGFADASTRHdyvngcdsSPVVFLEGIFFLPSFRORVAKOLI AAVORWGTNKGCREMASDTSPEnt iSOKVHOALGFEEF Eryi-----etervifyrkr<br/> -----HMDIRITSSDYEMVTSVLNwWggrQLKEK---L--PR-LFFEHFQDTSFITSEHNSMTGELIGFQSQS-----DIEKgtktvngisvfanYDGPgqdrvlfvkni-----</p> <p><b>Proposed:</b> aliSize=128 (resi) RMSD=2.07 (Å)<br/> lvprgsHMDIROMNKTHLHWRGLRKL-QL---WPGHPddaHlADGEEi lQADHLASFIAmADGVAIGFADASTRHdyvngcdsSPVVFLEGIFFLPSFRORVAKOLI AAVORWGTNKGCREMASDTSPEnt iSOKVHOALGFEEF Eryi-----RVI-FYRkrc-----c<br/> -----HMDIRITSSDYEMVTSVLNwWggrQLKEK---L--PR-LFFEHFQDTSFITSEHNSMTGELIGFQSQS-----DIEKgtktvngisvfanYDGPgqdrvlfvkni-----</p>                                                                                                                                                                     |
| 125 | <p>1s60A (152)</p> <hr/> <p>1z4rA (163)</p> | C | 7.24  | <p><b>TM-align:</b> aliSize=126 (resi) RMSD=2.83 (Å)<br/> lvprgSHMDIROMN---K-----T-H-EHWRGLRKO-LW-PGHPDdAHlADGEEi lQADHLASFIAmADGVAIGFADASTRHdyvngcdsSPVVFLEGIFFLPSFRORVAKOLI AAVORWGTNKGCREMASDTSPEnt iSOKVHOALGFEEF Eryi-----FYRkrc-----<br/> -----SGIIEFHVIGnsltpkanrrvlwVGLQNVFShqLPrMPKEY-YIARLVFDp--PK--HKTLALIKDGRVIGICFRMFPT-----OGFTEIVFCAVTSNEQVKYGTLMNHLKEYHIKHNILYFLTYADEY-Y--AIGYFKKQGF SKEI---kvpksrylgyikdyE---gatlmecelnp</p> <p><b>SARST:</b> aliSize=104 (resi) RMSD=3.31 (Å)<br/> lvprgshmdirqmknth-----sgiefhvignsltpkanrrvlwVGLQNVFShqLPrMPKEY-YIARLVFDp--PK--HKTLALIKDGRVIGICFRMFPT-----OGFTEIVFCAVTSNEQVKYGTLMNHLKEYHIKHNILYFLTYADEYAIgyfkkqgfskdkvpksrylgyikdyegatlmecelnp</p> <p>---qalgfeeervifyrkr<br/> npr-----</p> <p><b>BLAST:</b> aliSize=22 (resi) iden=6.58% (10/152) simi=14.47% (22/152)<br/> lvprgshmdirqmknthlehwrglrkqlwpghpddaHlADGEEi lQADHLASFIAmADGVAIGFADASTRHdyvngcdsspvvflegifvlps-----RORVAKOLI AAVORWGTNKGCREMASDTSPEnt iSOKVHOALGFEEF Eryi-----FYRkrc-----<br/> -----sgiefhvignsltpkanrrvlwVGLQNVFshqLprmpkeyiarlvfdpkhktlalikdgrvigicfrmfpsqgfteivfcavtsneqvkygtLMNHLKEYHIKHNILYFLTYADEYAIgyfkkqgfskdkvpksrylgyikdyegatlmecelnp</p> <p>MASDTSPEnt iSOKVHOALGFEEF Eryi-----FYRkrc-----c<br/> HLMNHLKEYHIKHNILYFLTYADEYAIgyfkkqgfskdkvpksrylgyikdyegatlmecelnp-</p> <p><b>Proposed:</b> aliSize=131 (resi) RMSD=2.26 (Å)<br/> lvprgSHMDIROMN---K-----T-H-EHWRGLRKO-LW-PGHPDdAHlADGEEi lQADHLASFIAmADGVAIGFADASTRHdyvngcdsSPVVFLEGIFFLPSFRORVAKOLI AAVORWGTNKGCREMASDTSPEnt iSOKVHOALGFEEF Eryi-----FYRkrc-----c<br/> -----SGIIEFHVIGnsltpkanrrvlwVGLQNVFShqLPrMPKEY-YIARLVFDp--PK--HKTLALIKDGRVIGICFRMFPT-----OGFTEIVFCAVTSNEQVKYGTLMNHLKEYHIKHNILYFLTYADEY-Y--AIGYFKKQGF SKEI---kvpksrylgyikdyegATLMCELNPr-</p>                                       |

|     |                                             |   |       |                                                                                                                                                                                                                                                                                                                                                                                                                                                                                                                                                                                                                                                                                                                                                                                                                                                                                                                                                                                                                                                                                                                                                                                                                                                                                                                                                                                                                                                                                                                                                                                                                                                                                                                                                                                                                                                                                                                   |
|-----|---------------------------------------------|---|-------|-------------------------------------------------------------------------------------------------------------------------------------------------------------------------------------------------------------------------------------------------------------------------------------------------------------------------------------------------------------------------------------------------------------------------------------------------------------------------------------------------------------------------------------------------------------------------------------------------------------------------------------------------------------------------------------------------------------------------------------------------------------------------------------------------------------------------------------------------------------------------------------------------------------------------------------------------------------------------------------------------------------------------------------------------------------------------------------------------------------------------------------------------------------------------------------------------------------------------------------------------------------------------------------------------------------------------------------------------------------------------------------------------------------------------------------------------------------------------------------------------------------------------------------------------------------------------------------------------------------------------------------------------------------------------------------------------------------------------------------------------------------------------------------------------------------------------------------------------------------------------------------------------------------------|
| 126 | <p>1s60A (152)</p> <hr/> <p>2reeA (199)</p> | C | 13.16 | <p><b>TM-align:</b> aliSize=135 (resi) RMSD=2.70 (Å)<br/> lvprgSHMDIROMNKTHLEHWRGRKQLPGHP--Dd-AHlADGEEILQADHLASFIAMADGVAIFADASIRHdYVNgcds-----SPVVFLEGI FVLP SFRORVAKOLI AAVQ-RWGTNKCREMASDTSPE-----TISOKVHOALGFEETERVIF<br/> -----NYNLRHPKIEDRDLIAETLCSenlQvDN-EEIYRRIFKIPQGOLELEDKIVGAIYSQRID-NPQ-----l1dnktctqvp1lhtesGVVQQLAVNILELONQGLGDRLEFLMLOYCAQISVEKVVAVILCRNypdyspmpmaeyihqknesgllvdPLLRFQIHGAKIEKLLPG</p> <p>Yrkrc-----<br/> Y----rpkdwenqtcgvlvsydiqhr</p> <p><b>SARST:</b> aliSize=136 (resi) RMSD=4.90 (Å)<br/> lvprgsHMDIROMNKTHLEHWRGRKQLPG--GHPDDAHLADGEEILQADHLASFIAMADGVAIFADASIR----HYVN-----GCDSSPVVFLEGI FVLP SFRORVAKOLI AAVORWGTN-KCREMASDTSPE-----SPENT-----ISOKVHOALGFEETERVIF<br/> -----NYNLRHPKIEDRDLIAETLCSenlQVDNEEYRRIFKIPQGOLELEDKIVGAIYSQRIDnpqllDNKtctqvp1lHTESGVVQQLAVNILELONQGLGDRLEFLMLOYCAQISVEKVVAVILCRNypdyspmpMAEYihqknesgllvdPLLRFQIHGAKIEKLLPgyrp</p> <p>-----fyrkrc<br/> kdwenqtcgvlvsydiqhr-----</p> <p><b>BLAST:</b> aliSize=32 (resi) iden=11.18% (17/152) simi=21.05% (32/152)<br/> lvprgshmdiromnkthlehwgrlqkwpghpddahladgeeilqadhlasfiamadgvaigfadasirhdvngc-----nyynlrhpkiedlrdliaetlcwsenlqvndneeiyrrifkipqgqfileledkivgaisqridnpqlldnktctqvp1lhtDSSPVVFLEGI FVLP SFRORVAKOLI AAV<br/> -----ORW-----TNNG-----CREMASDTSPEENTISOKVHOALGFEETERVIF-----algyfeetervifyrkrc<br/> LOYcaqisGVEVvavtLCRNY-PYYSF-MPMAEYIFHknesgllvdpllrhfqihgakiekllygyrpkdwenqtcgvlvsydiqhr-----</p> <p><b>Proposed:</b> aliSize=136 (resi) RMSD=2.23 (Å)<br/> lvprgSHMDIROMNKTHLEHWRGRKQLPG--HpdDAHLADGEEILQADHLASFIAMADGVAIFADASIRHdYVNgcds-----SPVVFLEGI FVLP SFRORVAKOLI AAVORWGTN-KGCREMASDTSPE-----TISOKVHOALGFEETER<br/> -----NYNLRHPKIEDRDLIAETLCSenlQvDN-EEIYRRIFKIPQGOLELEDKIVGAIYSQRID-NPQl1dnktctqvp1lhtes-----GVVQQLAVNILELONQGLGDRLEFLMLOYCAQISVEKVVAVILCRNypdyspmpmaeyihqknesgllvdPLLRFQIHGAKIEKLL<br/> YI-----FYR---KRC-----c<br/> LPgyrpkdWENqtcGVLvsydiqhr-----</p> |
| 127 | <p>1s60A (152)</p> <hr/> <p>1s7fA (181)</p> | N | 11.18 | <p><b>TM-align:</b> aliSize=137 (resi) RMSD=2.90 (Å)<br/> lvprg-----SHMDIROMNKTHLEHWRGRK--Q--WP--GHPD-DAHLADGEEILQAD--D-HLASFIAMADGVAIFADASIRHDYVngcdsSPVVFLEGI FVLP SFRORVAKOLI AAVORWGTN-KGCREMASDTSPEENTISOKVHOALGFEETERVIF-FYRkrce-----<br/> -----glvprgshmvveipvsTLELRAADESVPALHQLVlnkKawlQOSldWPTSqEETRKHVQGNILLHqRgYAKMYLIFCNEMAVLSFNATEP-----INKAAYIG-YWLDESFGQGIMSLSQALMTHYARRGDIRRFV IKCRVDQASNAARRNHITLEGCMKqAEY---lngdyhdvn</p> <p>-----myarii</p> <p><b>SARST:</b> aliSize=131 (resi) RMSD=3.93 (Å)<br/> lvprgs-----HMDIROMNKTHLEHWRGRK--Q--WP--GHPD-DAHLADGEEILQAD--D-HLASFIAMADGVAIFADASIRHDYV--GCDSSPVVFLEGI FVLP SFRORVAKOLI AAVORWGTN-KCREMASDTSPEENTISOKVHOALGFEETERVIF<br/> -----glvprgshmvveipvsTLELRAADESVPALHQLVlnkKawlQOSldWPTSqEETRKHVQGNILLHqRgYAKMYLIFCNEMAVLSFNATEP-----INKAAYIG-YWLDESFGQGIMSLSQALMTHYARRGDIRRFV IKCRVDQASNAARRNHITLEGCMKqAEYlngdyhdvn</p> <p>-----fyrkrc<br/> myarii-----</p> <p><b>BLAST:</b> aliSize=15 (resi) iden=7.89% (12/152) simi=9.87% (15/152)<br/> glvprgshmvveipvsTLELRAADESVPALHQLVlnkKawlQOSldWPTSqEETRKHVQGNILLHqRgYAKMYLIFCNEMAVLSFNATEP-----INKAAYIG-YWLDESFGQGIMSLSQALMTHYARRGDIRRFV IKCRVDQASNAARRNHITLEGCMKqAEYlngdyhdvnmyarii-----<br/> lvwghpddahladgeeilqadhlasfiamadgvaigfadasirhdvngcdsSPVVFLEGI FVLP SFRORVAKOLI AAVORWGTN-KGCREMASDTSPEENTISOKVHOALGFEETERVIF-FYRkrce-----</p> <p><b>Proposed:</b> aliSize=135 (resi) RMSD=2.24 (Å)<br/> glvprgshmvveipvsTLELRAADESVPALHQLVlnkKawlQOSldWPTSqEETRKHVQGNILLHqRgYAKMYLIFCNEMAVLSFNATEP-----INKAAYIG-YWLDESFGQGIMSLSQALMTHYARRGDIRRFV IKCRVDQASNAARRNHITLEGCMKqAEYlngdyhdvnmya<br/> ---yrkrce<br/> rii-----</p>                                                                                                                                                                                                                                                                              |
| 128 | <p>1s60A (152)</p> <hr/> <p>1s7fA (181)</p> | C | 10.53 | <p><b>TM-align:</b> aliSize=137 (resi) RMSD=2.90 (Å)<br/> lvprg-----SHMDIROMNKTHLEHWRGRK--Q--WP--GHPD-DAHLADGEEILQAD--D-HLASFIAMADGVAIFADASIRHDYVngcdsSPVVFLEGI FVLP SFRORVAKOLI AAVORWGTN-KGCREMASDTSPEENTISOKVHOALGFEETERVIF-FYRkrce-----<br/> -----glvprgshmvveipvsTLELRAADESVPALHQLVlnkKawlQOSldWPTSqEETRKHVQGNILLHqRgYAKMYLIFCNEMAVLSFNATEP-----INKAAYIG-YWLDESFGQGIMSLSQALMTHYARRGDIRRFV IKCRVDQASNAARRNHITLEGCMKqAEY---lngdyhdvn</p> <p>-----myarii</p> <p><b>SARST:</b> aliSize=131 (resi) RMSD=3.93 (Å)<br/> lvprgs-----HMDIROMNKTHLEHWRGRK--Q--WP--GHPD-DAHLADGEEILQAD--D-HLASFIAMADGVAIFADASIRHDYV--GCDSSPVVFLEGI FVLP SFRORVAKOLI AAVORWGTN-KCREMASDTSPEENTISOKVHOALGFEETERVIF<br/> -----glvprgshmvveipvsTLELRAADESVPALHQLVlnkKawlQOSldWPTSqEETRKHVQGNILLHqRgYAKMYLIFCNEMAVLSFNATEP-----INKAAYIG-YWLDESFGQGIMSLSQALMTHYARRGDIRRFV IKCRVDQASNAARRNHITLEGCMKqAEYlngdyhdvn</p> <p>-----fyrkrc<br/> myarii-----</p> <p><b>BLAST:</b> aliSize=15 (resi) iden=7.89% (12/152) simi=9.87% (15/152)<br/> glvprgshmvveipvsTLELRAADESVPALHQLVlnkKawlQOSldWPTSqEETRKHVQGNILLHqRgYAKMYLIFCNEMAVLSFNATEP-----INKAAYIG-YWLDESFGQGIMSLSQALMTHYARRGDIRRFV IKCRVDQASNAARRNHITLEGCMKqAEYlngdyhdvnmyarii-----<br/> lvwghpddahladgeeilqadhlasfiamadgvaigfadasirhdvngcdsSPVVFLEGI FVLP SFRORVAKOLI AAVORWGTN-KGCREMASDTSPEENTISOKVHOALGFEETERVIF-FYRkrce-----</p> <p><b>Proposed:</b> aliSize=134 (resi) RMSD=2.21 (Å)<br/> lvprgs-----HMDIROMNKTHLEHWRGRK--Q--WP--GHPD-DAHLADGEEILQAD--D-HLASFIAMADGVAIFADASIRHDYVngcdsSPVVFLEGI FVLP SFRORVAKOLI AAVORWGTN-KGCREMASDTSPEENTISOKVHOALGFEETERVIF<br/> -----glvprgshmvveipvsTLELRAADESVPALHQLVlnkKawlQOSldWPTSqEETRKHVQGNILLHqRgYAKMYLIFCNEMAVLSFNATEP-----INKAAYIG-YWLDESFGQGIMSLSQALMTHYARRGDIRRFV IKCRVDQASNAARRNHITLEGCMKqAEYlngdyh<br/> KRC-----c<br/> DVNmyarii-----</p>                                                                                               |

|     |                                        |   |       |                                                                                                                                                                                                                                                                                                                                                                                                                                                                                                                                                                                                                                                                                                                                                                                                                                                                                                                                                                                                                                                                                                                                                                                                                                                                                                                                                                                                                                                                                                                                                                                                                                                                                                                                                       |
|-----|----------------------------------------|---|-------|-------------------------------------------------------------------------------------------------------------------------------------------------------------------------------------------------------------------------------------------------------------------------------------------------------------------------------------------------------------------------------------------------------------------------------------------------------------------------------------------------------------------------------------------------------------------------------------------------------------------------------------------------------------------------------------------------------------------------------------------------------------------------------------------------------------------------------------------------------------------------------------------------------------------------------------------------------------------------------------------------------------------------------------------------------------------------------------------------------------------------------------------------------------------------------------------------------------------------------------------------------------------------------------------------------------------------------------------------------------------------------------------------------------------------------------------------------------------------------------------------------------------------------------------------------------------------------------------------------------------------------------------------------------------------------------------------------------------------------------------------------|
| 129 | <p>1s60A (152)</p> <p>1ml1dA (163)</p> | C | 8.55  | <p><b>TM-align:</b> aliSize=122 (resi) RMSD=2.58 (Å)<br/> lvprgshmdIROMKTHLEHWRLRKQW-PGHPDDAHLADGEEILQAdhLASFIAMADGVAIGFADASIRHDYvngcdsSPVVFLEGI FVLPSPFRQGVAKQIIAAVORWGTNKGCREMASDTSPEntiSOKVHOALGFEETErvi-----Fvrkrc-----<br/> -----LLDFDILTndgthrMKLIDLKNIFSRQPkMPKEY-IV-KLVFDR--H--HESMVILKKNKQKVICGICFRQYKP-----ORFAEVAFLAVTANEQVRGYGTRLMNKFCDHMOKQNI EYLLTYAD-NF--AIGYFKKQGTKEH---rmpqekwkyiKD----ydggtlmecyihpyvdygr</p> <p><b>SARST:</b> aliSize=105 (resi) RMSD=9.67 (Å)<br/> lvprgshmdirqmknkthlehwrglrkqlwpghpddahladgeeilqadhlasfiamadgvaigfadasiRHDYvngcdsSPVVFLEGI FVLPSPFRQGVAKQIIAAVORWGTNKGCREMASDTSPEntiSOKVHOALGFEETErvi-----Fvrkrc-----<br/> -----LDFDILTndgthrMKLIDLKNIFSRQPkMPKEY-IV-KLVFDR--H--HESMVILKKNKQKVICGICFRQYKP-----ORFAEVAFLAVTANEQVRGYGTRLMNKFCDHMOKQNI EYLLTYAD-NF--AIGYFKKQGTKEH---rmpqekwkyiKD----ydggtlmecyihpyvdygr</p> <p><b>BLAST:</b> aliSize=11 (resi) iden=3.95% (6/152) simi=7.24% (11/152)<br/> lvprgshmdirqmknkthlehwrglrkqlwpghpddahladgeeilqadhlasfiamadgvaigfadasiRHDYvngcdsSPVVFLEGI FVLPSPFRQGVAKQIIAAVORWGTNKGCREMASDTSPEntiSOKVHOALGFEETErvi-----Fvrkrc-----<br/> -----LDFDILTndgthrMKLIDLKNIFSRQPkMPKEY-IV-KLVFDR--H--HESMVILKKNKQKVICGICFRQYKP-----ORFAEVAFLAVTANEQVRGYGTRLMNKFCDHMOKQNI EYLLTYAD-NF--AIGYFKKQGTKEH---rmpqekwkyiKD----ydggtlmecyihpyvdygr</p> <p><b>Proposed:</b> aliSize=130 (resi) RMSD=2.27 (Å)<br/> lvprgshmdIROMKTHLEHWRLRKQW-PGHPDDAHLADGEEILQAdhLASFIAMADGVAIGFADASIRHDYvngcdsSPVVFLEGI FVLPSPFRQGVAKQIIAAVORWGTNKGCREMASDTSPEntiSOKVHOALGFEETErvi-----Fvrkrc-----<br/> -----LLDFDILTndgthrMKLIDLKNIFSRQPkMPKEY-IV-KLVFDR--H--HESMVILKKNKQKVICGICFRQYKP-----ORFAEVAFLAVTANEQVRGYGTRLMNKFCDHMOKQNI EYLLTYAD-NF--AIGYFKKQGTKEH---rmpqekwkyiKD----ydggtlmecyihpyvdygr</p> |
| 130 | <p>1s60A (152)</p> <p>lyvoA (169)</p>  | C | 15.13 | <p><b>TM-align:</b> aliSize=132 (resi) RMSD=2.41 (Å)<br/> lvprgshmdIROMKTHLEHWRLRKQW-PGHPDDAHLADGEEILQAdhLASFIAMADGVAIGFADASIRHDYvngcdsSPVVFLEGI FVLPSPFRQGVAKQIIAAVORWGTNKGCREMASDTSPEntiSOKVHOALGFEETErvi-----Fvrkrc-----<br/> -----SIRDAGVADLPGILAIYNDVAVGntaiwneTPVLIANRQWFDTRARQGYPILVASDAAGVLYSYGDWRPF-----egFRGTVEH-SVYVRDDORGGKLGVLLOALITERARAOQLHVVAIESGNAASIGLHRRLGFEISGQPVGQKfgrwldltfqlndptrsap</p> <p><b>SARST:</b> aliSize=135 (resi) RMSD=4.11 (Å)<br/> lvprgshmdIROMKTHLEHWRLRKQW-PGHPDDAHLADGEEILQAdhLASFIAMADGVAIGFADASIRHDYvngcdsSPVVFLEGI FVLPSPFRQGVAKQIIAAVORWGTNKGCREMASDTSPEntiSOKVHOALGFEETErvi-----Fvrkrc-----<br/> -----SIRDAGVADLPGILAIYNDVAVGntaiwneTPVLIANRQWFDTRARQGYPILVASDAAGVLYSYGDWRPF-----egFRGTVEH-SVYVRDDORGGKLGVLLOALITERARAOQLHVVAIESGNAASIGLHRRLGFEISGQPVGQKfgrwldltfqlndptrsap</p> <p><b>BLAST:</b> aliSize=27 (resi) iden=10.53% (16/152) simi=17.76% (27/152)<br/> lvprgshmdirqmknkthlehwrglrkqlwpghpddahladgeeilqadhlasfiamadgvaigfadasiRHDYvngcdsSPVVFLEGI FVLPSPFRQGVAKQIIAAVORWGTNKGCREMASDTSPEntiSOKVHOALGFEETErvi-----Fvrkrc-----<br/> -----SIRDAGVADLPGILAIYNDVAVGntaiwneTPVLIANRQWFDTRARQGYPILVASDAAGVLYSYGDWRPF-----egFRGTVEH-SVYVRDDORGGKLGVLLOALITERARAOQLHVVAIESGNAASIGLHRRLGFEISGQPVGQKfgrwldltfqlndptrsap</p> <p><b>Proposed:</b> aliSize=136 (resi) RMSD=2.02 (Å)<br/> lvprgshmdIROMKTHLEHWRLRKQW-PGHPDDAHLADGEEILQAdhLASFIAMADGVAIGFADASIRHDYvngcdsSPVVFLEGI FVLPSPFRQGVAKQIIAAVORWGTNKGCREMASDTSPEntiSOKVHOALGFEETErvi-----Fvrkrc-----<br/> -----SIRDAGVADLPGILAIYNDVAVGntaiwneTPVLIANRQWFDTRARQGYPILVASDAAGVLYSYGDWRPF-----egFRGTVEH-SVYVRDDORGGKLGVLLOALITERARAOQLHVVAIESGNAASIGLHRRLGFEISGQPVGQKfgrwldltfqlndptrsap</p>                                                               |
| 131 | <p>1s60A (152)</p> <p>2ob0A (154)</p>  | C | 10.53 | <p><b>TM-align:</b> aliSize=134 (resi) RMSD=2.77 (Å)<br/> lvprgshmdIROMKTHLEHWRLRKQW-PGHPDDAHLADGEEILQAdhLASFIAMADGVAIGFADASIRHDYvngcdsSPVVFLEGI FVLPSPFRQGVAKQIIAAVORWGTNKGCREMASDTSPEntiSOKVHOALGFEETErvi-----Fvrkrc-----<br/> -----SKGSRIELGDVTPHNIKQLKRNQVIFVSY--N-DKFKYKDVLEVGLAKLAFYNDIYVAVCCRVDIS--NQKRLYI-TLGCAPYRRLIGTKLNHVLNICEKDGTFDNIYLHVQISNESAIIDFYRKFGEIITKKNY---ykriepadahlqknl</p> <p><b>SARST:</b> aliSize=130 (resi) RMSD=3.36 (Å)<br/> lvprgshmdIROMKTHLEHWRLRKQW-PGHPDDAHLADGEEILQAdhLASFIAMADGVAIGFADASIRHDYvngcdsSPVVFLEGI FVLPSPFRQGVAKQIIAAVORWGTNKGCREMASDTSPEntiSOKVHOALGFEETErvi-----Fvrkrc-----<br/> -----SKGSRIELGDVTPHNIKQLKRNQVIFVSY--N-DKFKYKDVLEVGLAKLAFYNDIYVAVCCRVDIS--NQKRLYI-TLGCAPYRRLIGTKLNHVLNICEKDGTFDNIYLHVQISNESAIIDFYRKFGEIITKKNY---ykriepadahlqknl</p> <p><b>BLAST:</b> aliSize=65 (resi) iden=19.08% (29/152) simi=42.76% (65/152)<br/> lvprgshmdirqmknkthlehwrglrkqlwpghpddahladgeeilqadhlasfiamadgvaigfadasiRHDYvngcdsSPVVFLEGI FVLPSPFRQGVAKQIIAAVORWGTNKGCREMASDTSPEntiSOKVHOALGFEETErvi-----Fvrkrc-----<br/> -----SKGSRIELGDVTPHNIKQLKRNQVIFVSY--N-DKFKYKDVLEVGLAKLAFYNDIYVAVCCRVDIS--NQKRLYI-TLGCAPYRRLIGTKLNHVLNICEKDGTFDNIYLHVQISNESAIIDFYRKFGEIITKKNY---ykriepadahlqknl</p> <p><b>Proposed:</b> aliSize=134 (resi) RMSD=2.13 (Å)<br/> lvprgshmdIROMKTHLEHWRLRKQW-PGHPDDAHLADGEEILQAdhLASFIAMADGVAIGFADASIRHDYvngcdsSPVVFLEGI FVLPSPFRQGVAKQIIAAVORWGTNKGCREMASDTSPEntiSOKVHOALGFEETErvi-----Fvrkrc-----<br/> -----SKGSRIELGDVTPHNIKQLKRNQVIFVSY--N-DKFKYKDVLEVGLAKLAFYNDIYVAVCCRVDIS--NQKRLYI-TLGCAPYRRLIGTKLNHVLNICEKDGTFDNIYLHVQISNESAIIDFYRKFGEIITKKNY---ykriepadahlqknl</p>                                                                                                               |

|     |                                       |   |       |                                                                                                                                                                                                                                                                                                                                                                                                                                                                                                                                                                                                                                                                                                                                                                                                                                                                                                                                                                                                                                                                                                                                                                                                                                                                                                                                                                                                                                                                                                                                                                                                                                                                                                                                                                                                                                                                                                                                                                                                                                                                                                                                                                                                                                                                                                                    |
|-----|---------------------------------------|---|-------|--------------------------------------------------------------------------------------------------------------------------------------------------------------------------------------------------------------------------------------------------------------------------------------------------------------------------------------------------------------------------------------------------------------------------------------------------------------------------------------------------------------------------------------------------------------------------------------------------------------------------------------------------------------------------------------------------------------------------------------------------------------------------------------------------------------------------------------------------------------------------------------------------------------------------------------------------------------------------------------------------------------------------------------------------------------------------------------------------------------------------------------------------------------------------------------------------------------------------------------------------------------------------------------------------------------------------------------------------------------------------------------------------------------------------------------------------------------------------------------------------------------------------------------------------------------------------------------------------------------------------------------------------------------------------------------------------------------------------------------------------------------------------------------------------------------------------------------------------------------------------------------------------------------------------------------------------------------------------------------------------------------------------------------------------------------------------------------------------------------------------------------------------------------------------------------------------------------------------------------------------------------------------------------------------------------------|
| 132 | <p>1s60A (152)</p> <p>2vi7A (163)</p> | C | 14.47 | <p><b>TM-align:</b> aliSize=135 (resi) RMSD=2.91 (Å)<br/> lvprgshMDIROMNKTLEHWRGLRKO---L---WPGHPD-DAHLADGEEIIOADHLASFIAMADVAIGFADASIRHDYVngcdsPVVFLFEGIFVLPsFRORGVAKOLIAAVORWGT-NKGCREMASDTSPENTISOKVHOALGFEETERVIFyrkrc-----<br/> -----TIRLERYSERIVEGLTALYNDpavarqvlQMPYQSVQRRKRLHDS-DDRRLILVALHOCQDVIGSASLEOHPRIR---RSHSGSIgmvava--WQKGVGSRLLGELLDIADnWMNLRVELTVYTDNAPALALYRKFGFEETEGEMRDY---avrdrgrfvdvysmarlrr</p> <p><b>SARST:</b> aliSize=133 (resi) RMSD=3.73 (Å)<br/> lvprgshMDIROMNKTLEHWRGLRKO---L---WPGHPD-DAHLADGEEIIOADHLASFIAMADVAIGFADASIRHDYVngcdsSPVFLFEGIFVLPsFRORGVAKOLIAAVORWGT-NKGCREMASDTSPENTISOKVHOALGFEETERVI-----fyrkrc<br/> -----TIRLERYSERIVEGLTALYNDpavarqvlQMPYQSVQRRKRLHDS-DDRRLILVALHOCQDVIGSASLEOHPRIRRS-HSG--SIGMVAV--AWQKGVGSRLLGELLDIADnWMNLRVELTVYTDNAPALALYRKFGFEETEGEMRDYavrdrgrfvdvysmarlrr-----</p> <p><b>BLAST:</b> aliSize=48 (resi) iden=18.42% (28/152) simi=31.58% (48/152)<br/> lvprgshmdi r q m n k t h l e h w r g l r k o --- l --- w p g h p d - d a h l a d g e e i i o a d h l a s f i a m a d v a i g f a d a s i r h d y v n g c d s s p v v f l e g i f v l p s f r o r g v a k o l i a a v o r w g t n k g c r e m a s d t s p e n t i s o k v h o a l g f e e t e r v i f y r k r c -----<br/> -----t i r l e r y s e r h v e g l t a l y n d p a v a r q v l q m p y q s v e q r r k r l --- d s l --- d --- d r l l i l v a l h o c d v i g s a s l e o h p r i r r s h s g s i --- g m g v a w q k g v g s r l l g e l l d i a d n w m n l r r v e l t v y t d n a p a l a l y r k f g f e e t e g e m r d y a<br/> -----<br/> -----v i f y r k r c<br/> avrdrgrfvdvysmarlrr-----</p> <p><b>Proposed:</b> aliSize=137 (resi) RMSD=2.35 (Å)<br/> lvprgshMDIROMNKTLEHWRGLRKO---L---WPGHPD-DAHLADGEEIIOADHLASFIAMADVAIGFADASIRHD--YvngcdsPVVFLFEGIFVLPsFRORGVAKOLIAAVORWGT-NKGCREMASDTSPENTISOKVHOALGFEETERV-----VIFYRKRC--c<br/> -----TIRLERYSERIVEGLTALYNDpavarqvlQMPYQSVQRRKRLHDS-DDRRLILVALHOCQDVIGSASLEOHPRIR---RSHSGSIgmvava--WQKGVGSRLLGELLDIADnWMNLRVELTVYTDNAPALALYRKFGFEETEGEMRDYavrdrgrfvdvysmarlrr-----</p>                                                                                                                                                                                                                                  |
| 133 | <p>1s60A (152)</p> <p>1q2yA (140)</p> | C | 12.86 | <p><b>TM-align:</b> aliSize=121 (resi) RMSD=2.41 (Å)<br/> lvprgshMDIROMNKTLEHWRGLRKO---L---WPGHPD-DAHLADGEEIIOADHLASFIAMADVAIGFADASIRHDYVngcdsPVVFLFEGIFVLPsFRORGVAKOLIAAVORWGT-NKGCREMASDTSPENTISOKVHOALGFEETERVIFyrkrc-----<br/> -----KAVIAKNEEQKDAFYVREEVFVkeqnvPAEE-EI-DEL-EN-E--SEHIVVYDGEKPVGAGRWRMKD-----GYGKLERICVTKSHSAGVGGIMKALEKAAADGASGFIILNAQ--TQ-AVPFYKHHYRVLSEKEF-----ldagiphlqmmkd</p> <p><b>SARST:</b> aliSize=90 (resi) RMSD=5.54 (Å)<br/> lvprgshmdi r q m n k t h l e h w r g l r k q l w p g h p d d a h l a d g e e i l q a d h l a s f i a m a d v a i g f a d a s i r h d y v n g c d s s p v v f l e g i f v l p s f r o r g v a k o l i a a v o r w g t n k g c r e m a s d t s p e n t i s o k v h o a l g f e e t e r v i f y r k r c -----<br/> -----m k a v i a k n e e q l k d a f y v r e e v f v k e q n v p a e e i d e l e n e s e h i v v y d g e k p v g a g r w r m k d --- m k d g --- y g k l e r i c v - t k s h s a g v g g i i m k a l e k a a a d g a s g f i l n a q t o a v p f y k h h y r v l s e k e f l d a g i p h l q m m k d<br/> -RVIFYRK--rc<br/> I P H L Q M M k d --</p> <p><b>BLAST:</b> aliSize=34 (resi) iden=14.29% (20/140) simi=24.29% (34/140)<br/> lvprgshmdi r q m n k t h l e h w r g l r k q l w p g h p d d a h l a d g e e i l q a d h l a s f i a m a d v a i g f a d a s i r h d y v n g c d s s p v v f l e g i f v l p s f r o r g v a k o l i a a v o r w g t n k g c r e m a s d t s p e n t i s o k v h o a l g f e e t e r v i f y r k r c -----<br/> -----m k a v i a k n e e q l k d a f y v r e e v f v k e q n v p a e e i d e l e n e s e h i v v y d g e k p v g a g r w r m k d --- m k d g --- y g k l e r i c v - t k s h s a g v g g i i m k a l e k a a a d g a s g f i l n a q t o a v p f y k h h y r v l s e k e f l d a g i p h l q m m k d<br/> cremasdtspentisqkvhqlgfeeterVifyrkrc<br/> -----</p> <p><b>Proposed:</b> aliSize=125 (resi) RMSD=2.02 (Å)<br/> lvprgshMDIROMNKTLEHWRGLRKO---L---WPGHPD-DAHLADGEEIIOADHLASFIAMADVAIGFADASIRHDYVngcdsPVVFLFEGIFVLPsFRORGVAKOLIAAVORWGT-NKGCREMASDTSPENTISOKVHOALGFEETERV-----VIFYRKRC--c<br/> -----KAVIAKNEEQKDAFYVREEVFVkeqnvPAEE-EI-DEL-EN-E--SEHIVVYDGEKPVGAGRWRMKD-----GYGKLERICVTKSHSAGVGGIMKALEKAAADGASGFIILNAQ--TQ-AVPFYKHHYRVLSEKEFldagI P H L Q M M k d --</p> |
| 134 | <p>1s60A (152)</p> <p>1yk3A (198)</p> | C | 12.50 | <p><b>TM-align:</b> aliSize=140 (resi) RMSD=2.90 (Å)<br/> lvprgshMDIROMNKTLEHWRGLRKO---L---WPGHPD-DAHLADGEEIIOADHLASFIAMADVAIGFADASIRHDYVngcdsPVVFLFEGIFVLPsFRORGVAKOLIAAVORWGT-NKGCREMASDTSPENTISOKVHOALGFEETERVIFyrkrc-----<br/> -----addalvrlarerfdlpdqvrllarppvpslePPYGLRVAQLTDAEMLAEMWNRphaaawEYDWAASRWQRHLNAQEGTYSLPLGSHWCTDGYLELYWAAKd1iSHYYDADPYDLG-HAAdLKVnRGfGpLLPRIVASVFANEP-RCRRIMFPDHRNTATRRLCEWACKFLGE</p> <p><b>SARST:</b> aliSize=139 (resi) RMSD=5.55 (Å)<br/> lvprgshMDIROMNKTLEHWRGLRKO---L---WPGHPD-DAHLADGEEIIOADHLASFIAMADVAIGFADASIRHDYVngcdsPVVFLFEGIFVLPsFRORGVAKOLIAAVORWGT-NKGCREMASDTSPENTISOKVHOALGFEETERVIFyrkrc-----<br/> -----addalvrlarerfdlpdqvrllarppvpslePPYGLRVAQLTDAEMLAEMWNRphaaawEYDWAASRWQRHLNAQEGTYSLPLGSHWCTDGYLELYWAAKd1iSHYYDADPYDLG-HAAdLKVnRGfGpLLPRIVASVFANEP-RCRRIMFPDHRNTATRRLCEWACKFLGE</p> <p><b>BLAST:</b> aliSize=48 (resi) iden=17.76% (27/152) simi=31.58% (48/152)<br/> lvprgshmdi r q m n k t h l e h w r g l r k o --- l --- w p g h p d - d a h l a d g e e i i o a d h l a s f i a m a d v a i g f a d a s i r h d y v n g c d s s p v v f l e g i f v l p s f r o r g v a k o l i a a v o r w g t n k g c r e m a s d t s p e n t i s o k v h o a l g f e e t e r v i f y r k r c -----<br/> -----addalvrlarerfdlpdqvrllarppvpsleppyglrvaqltdaemlaeawmnrphaaawEYDWAASRWQRHLNAQEGTYSLPLGSHWCTDGYLELYWAAKd1iSHYYDADPYDLG-HAAdLKVnRGfGpLLPRIVASVFANEP-RCRRIMFPDHRNTATRRLCEWACKFLGE<br/> OAL-----feetervVifyrkrc<br/> EWACKflgehdttnrmalyaleapt-----</p> <p><b>Proposed:</b> aliSize=143 (resi) RMSD=2.74 (Å)<br/> lvprgshMDIROMNKTLEHWRGLRKO---L---WPGHPD-DAHLADGEEIIOADHLASFIAMADVAIGFADASIRHDYVngcdsPVVFLFEGIFVLPsFRORGVAKOLIAAVORWGT-NKGCREMASDTSPENTISOKVHOALGFEETERVIFyrkrc-----<br/> -----addalvrlarerfdlpdqvrllarppvpsleppyglrvaqltdaemlaeawmnrphaaawEYDWAASRWQRHLNAQEGTYSLPLGSHWCTDGYLELYWAAKd1iSHYYDADPYDLG-HAAdLKVnRGfGpLLPRIVASVFANEP-RCRRIMFPDHRNTATRRLCEWACKFLGE</p> <p>VIFYRKRC--c<br/> HDTtnrmalyaleapt-----</p>                                                                                                                                                                                                                                                                                                                         |

|     |                                       |   |       |                                                                                                                                                                                                                                                                                                                                                                                                                                                                                                                                                                                                                                                                                                                                                                                                                                                                                                                                                                                                                                                                                                                                                                                                                                                                                                                                                                                                                                                                                                                                                                                                                                                                                                                                                                                                                                                              |
|-----|---------------------------------------|---|-------|--------------------------------------------------------------------------------------------------------------------------------------------------------------------------------------------------------------------------------------------------------------------------------------------------------------------------------------------------------------------------------------------------------------------------------------------------------------------------------------------------------------------------------------------------------------------------------------------------------------------------------------------------------------------------------------------------------------------------------------------------------------------------------------------------------------------------------------------------------------------------------------------------------------------------------------------------------------------------------------------------------------------------------------------------------------------------------------------------------------------------------------------------------------------------------------------------------------------------------------------------------------------------------------------------------------------------------------------------------------------------------------------------------------------------------------------------------------------------------------------------------------------------------------------------------------------------------------------------------------------------------------------------------------------------------------------------------------------------------------------------------------------------------------------------------------------------------------------------------------|
| 135 | <p>1s60A (152)</p> <p>lyghA (164)</p> | C | 7.24  | <p><b>TM-align:</b> aliSize=124 (resi) RMSD=3.04 (Å)<br/> lvprgshMDIRQMNKthLEHWRLRKQLWPGHPDDAHLADGEEIQAadHLASFIAMADGVAIGFADASIRHDYVNGCDSSPVVFLGIFVLPSPFRQGVAKQLAAVQRWGTNKGCREMASDTSPEntiSOKVHOALGFEEERv-----IFYRkrC-----<br/> -----KIEFVNVndnTkENMMVLTGLKNIQKqkqkmpKEY-IARLVY-DR-S--HLSMAVIRKPIITVVGGITYRPFdk-----REFAEIVFCAISSTEQVRCYGAHLMNHLKDYVRnTSNIKYFLTYAD--NY-AIGYFKKQGTKEI--tldksiwmgyiKDY----eggTlmqcsmlpriyld</p> <p><b>SARST:</b> aliSize=108 (resi) RMSD=4.66 (Å)<br/> lvprgshMDIRQMNKthLEHWRLRKQLWPGHPDDAHLADGEEIQAadHLASFIAMADGVAIGFADASIRHDYVNGCDSSPVVFLGIFVLPSPFRQGVAKQLAAVQRWGTNKGCREMASDTSPEntiSOKVHOALGFEEERv-----IFYRkrC-----<br/> -----kiefrvvnndntkenmmvltgkniFOKQLPKM-----KEYIARLVYDRSHLSMAVIRKPIITVVGGITYRPFdk-----EF-----AEIVFCAISSTEQVRCYGAHLMNHLKDYVRnTSNIKYFLTYADNYAIGYFK-----QFtkEITLdksiwmgyiKDYeggTlm</p> <p>-----fykrC<br/> qcsmlpriyld-----</p> <p><b>BLAST:</b> aliSize=14 (resi) iden=5.92% (9/152) simi=9.21% (14/152)<br/> lvprgshMDIRQMNKthLEHWRLRKQLWPGHPDDAHLADGEEIQAadHLASFIAMADGVAIGFADASIRHDYVNGCDSSPVVFLGIFVLPSPFRQGVAKQLAAVQRWGTNKGCREMASDTSPEntiSOKVHOALGFEEERv-----IFYRkrC-----<br/> -----kiefrvvnndntkenmmvltgkniFOKQLPKM-----KEYIARLVYDRSHLSMAVIRKPIITVVGGITYRPFdkrefaeivfcaisssteqvrvgahlmn-----YVVRNTSNIKYFLTYADNYAIGYFKkqgftkEITLdksiwmgyiKDYeggTlm</p> <p>-----adasirhdyvngcdsspvvflegifvlpsfrqgvakqliaavqrwgtngkcremasdtspentisqkvhqlgfeerervifykrC<br/> qcsmlpriyld-----</p> <p><b>Proposed:</b> aliSize=130 (resi) RMSD=2.40 (Å)<br/> lvprgshMDIRQMNKthLEHWRLRKQLWPGHPDDAHLADGEEIQAadHLASFIAMADGVAIGFADASIRHDYVNGCDSSPVVFLGIFVLPSPFRQGVAKQLAAVQRWGTNKGCREMASDTSPEntiSOKVHOALGFEEERv-----IFYRkrC-----<br/> -----KIEFVNVndnTkENMMVLTGLKNIQKqkqkmpKEY-IARLVY-DR-S--HLSMAVIRKPIITVVGGITYRPFdk-----REFAEIVFCAISSTEQVRCYGAHLMNHLKDYVRnTSNIKYFLTYAD--NY-AIGYFKKQGTKEI--tldksiwmgyiKDYeggTLMQCSMLPriyld-</p> |
| 136 | <p>1s60A (152)</p> <p>2bswA (145)</p> | C | 15.17 | <p><b>TM-align:</b> aliSize=128 (resi) RMSD=2.60 (Å)<br/> lvprgshMDIRQMNKthLEHWRLRKQLWPGHPDDAHLADGEEIQAadHLASFIAMADGVAIGFADASIRHDYVNGCDSSPVVFLGIFVLPSPFRQGVAKQLAAVQRWGTNKGCREMASDTSPEntiSOKVHOALGFEEERv-----IFYRkrC-----<br/> -----IEVKPINA--ED-TYELRHRILRNOPIEAC--FE-SD-LLRGAFHLGGYGGKLSIASFHQAHS-E-LOGQKQYQLR-ATIEGYREQAGSSLTKHAEEILRKRADLLWCNART-S--ASGYKKGHSEQGEVFDTPVgphilykrit</p> <p><b>SARST:</b> aliSize=129 (resi) RMSD=4.06 (Å)<br/> lvprgshMDIRQMNKthLEHWRLRKQLWPGHPDDAHLADGEEIQAadHLASFIAMADGVAIGFADASIRHDYVNGCDSSPVVFLGIFVLPSPFRQGVAKQLAAVQRWGTNKGCREMASDTSPEntiSOKVHOALGFEEERv-----IFYRkrC-----<br/> -----iEVKPIAEDTYELRHRILRNOPIEACFEFES---DLLRGAFHLGGYGGKLSIASFHQAHSSELOGQKQYQL---RGATIEGYREQAGSSLTKHAEEILRKRADLLWCNARTSAGYK---KLGHSE--QGEVFDTPVgphilykrit-</p> <p><b>BLAST:</b> aliSize=44 (resi) iden=19.01% (27/145) simi=30.99% (44/145)<br/> lvprgshMDIRQMNKthLEHWRLRKQLWPGHPDDAHLADGEEIQAadHLASFIAMADGVAIGFADASIRHDYVNGCDSSPVVFLGIFVLPSPFRQGVAKQLAAVQRWGTNKGCREMASDTSPEntiSOKVHOALGFEEERv-----IFYRkrC-----<br/> -----ievkpinaedtyelrhrilrnopieacfeESDRLRGAFHLGGYGGKLSIASFHQAHSSELOGQKQYQLR-ATIEGYREQAGSSLTKHAEEILRKRADLLWCNARTSAGYK---KLGHSE--QGEVFDTPVgphilykrit-</p> <p><b>Proposed:</b> aliSize=133 (resi) RMSD=2.21 (Å)<br/> lvprgshMDIRQMNKthLEHWRLRKQLWPGHPDDAHLADGEEIQAadHLASFIAMADGVAIGFADASIRHDYVNGCDSSPVVFLGIFVLPSPFRQGVAKQLAAVQRWGTNKGCREMASDTSPEntiSOKVHOALGFEEERv-----IFYRkrC-----<br/> -----IEVKPINA--ED-TYELRHRILRNOPIEAC-MF--sD-LLRGAFHLGGYGGKLSIASFHQAHS-E-LOGQKQYQLR-ATIEGYREQAGSSLTKHAEEILRKRADLLWCNART-S--ASGYKKGHSEQGEVfdtpVGPHILMykritc-</p>                                                                                                                                                                                                                                                                    |
| 137 | <p>1s60A (152)</p> <p>2pclA (173)</p> | C | 15.79 | <p><b>TM-align:</b> aliSize=133 (resi) RMSD=2.82 (Å)<br/> lvprgshMDIRQMNKthLEHWRLRKQLWPGHPDDAHLADGEEIQAadHLASFIAMADGVAIGFADASIRHDYVNGCDSSPVVFLGIFVLPSPFRQGVAKQLAAVQRWGTNKGCREMASDTSPEntiSOKVHOALGFEEERv-----IFYRkrC-----<br/> -----nlyfQGQIRLAFPNEIDQI-LTIEEARAeiaktgsdqwQkedGY--PNRNITIDDLN--GYAVWVIEDG-LATYAVIDGIEEvYdaIyegkWIHNHRYLTFHRIAISNOFRGRGLAQTFLOGLIEGHK---GPDFRCDTHEKNVT-CHILNKLGYOYCGKvpldgvrIAYOKIKek</p> <p><b>SARST:</b> aliSize=138 (resi) RMSD=7.74 (Å)<br/> lvprgshMDIRQMNKthLEHWRLRKQLWPGHPDDAHLADGEEIQAadHLASFIAMADGVAIGFADASIRHDYVNGCDSSPVVFLGIFVLPSPFRQGVAKQLAAVQRWGTNKGCREMASDTSPEntiSOKVHOALGFEEERv-----IFYRkrC-----<br/> -----nlyfQGQIRLAFPNEIDQIillieearAeIAKTGSDQWQKEdgypnRNDITIDDLNGY-----WVGIEDGLATYAVIDGHevydAIEGKWLHDNhRYLTFHRIAISNOFRGRGLAQTFLOGLIEGHK---GPDFRCDTHEKNVT-CHILNKLGYOYCGKvpldgvrIAYOKIKek-</p> <p><b>BLAST:</b> aliSize=66 (resi) iden=22.37% (34/152) simi=43.42% (66/152)<br/> lvprgshMDIRQMNKthLEHWRLRKQLWPGHPDDAHLADGEEIQAadHLASFIAMADGVAIGFADASIRHDYVNGCDSSPVVFLGIFVLPSPFRQGVAKQLAAVQRWGTNKGCREMASDTSPEntiSOKVHOALGFEEERv-----IFYRkrC-----<br/> -----nlyfqqgqirlafpneidqillieearAeIAKTGSDQWQKEdgypnRNDITIDDLNGY-----WVGIEDGLATYAVIDGHevydAIEGKWLHDNhRYLTFHRIAISNOFRGRGLAQTFLOGLIEGHK---GPDFRCDTHEKNVT-CHILNKLGYOYCGKvpldgvrIAYOKIKek-</p> <p>----ifykrC<br/> ikek-----</p> <p><b>Proposed:</b> aliSize=137 (resi) RMSD=2.30 (Å)<br/> lvprgshMDIRQMNKthLEHWRLRKQLWPGHPDDAHLADGEEIQAadHLASFIAMADGVAIGFADASIRHDYVNGCDSSPVVFLGIFVLPSPFRQGVAKQLAAVQRWGTNKGCREMASDTSPEntiSOKVHOALGFEEERv-----IFYRkrC-----<br/> -----nlyfqqgqirlafpneidqillieearAeIAKTGSDQWQKEdgypnRNDITIDDLN--GYAVWVIEDG-LATYAVIDGIEEvYdalyegkWIHNHRYLTFHRIAISNOFRGRGLAQTFLOGLIEGHK---GPDFRCDTHEKNVT-CHILNKLGYOYCGKvpldgvrIAYOKIKek-</p>                                                                                                        |

|     |                                             |   |       |                                                                                                                                                                                                                                                                                                                                                                                                                                                                                                                                                                                                                                                                                                                                                                                                                                                                                                                                                                                                                                                                                                                                                                                                                                                                                                                                                                                                                                                                                                                                                                                                                                                                                                                                                                              |
|-----|---------------------------------------------|---|-------|------------------------------------------------------------------------------------------------------------------------------------------------------------------------------------------------------------------------------------------------------------------------------------------------------------------------------------------------------------------------------------------------------------------------------------------------------------------------------------------------------------------------------------------------------------------------------------------------------------------------------------------------------------------------------------------------------------------------------------------------------------------------------------------------------------------------------------------------------------------------------------------------------------------------------------------------------------------------------------------------------------------------------------------------------------------------------------------------------------------------------------------------------------------------------------------------------------------------------------------------------------------------------------------------------------------------------------------------------------------------------------------------------------------------------------------------------------------------------------------------------------------------------------------------------------------------------------------------------------------------------------------------------------------------------------------------------------------------------------------------------------------------------|
| 138 | <p>1s60A (152)</p> <hr/> <p>2q7bA (164)</p> | C | 14.47 | <p><b>TM-align:</b> aliSize=131 (resi) RMSD=2.60 (Å)<br/> lvprGSHMDIRMNKT--HLEHWRGRLKQLWP-----GHPddAhIAdGEEILQ---ADHLASFIAMADGVAIGFADASIRHdyvngcdsSPVVFLEGIIFVLSFRQ--RGVAKOIAAVqRWGTNKGCREMASDTSPENTISOKVHOALGFEETERVIFR-----FYRkrc-----<br/> -----FGG-EIKEYENPyHLAQLVDIINYQNieakldIKA--EQ-DIIFQIENyyqNRKGQFWALENEKVVGSIALLRID-----DKTAVLKKFFTYPKYGNpVRLGRKIFERFLFARASKFTRIVLDTPEKEKRSHFFYENQFKQ-ITRdeIdvdyiFPD---rdsriyvkll</p> <p><b>SARST:</b> aliSize=103 (resi) RMSD=6.76 (Å)<br/> lvprgshmdirqmknkthlehwrglrkqlwpghpddahlad-----GEEILADHLASFIAMADGVAIGFAdasirhDYVNGCISSPVVFLEGIIFVLSFRQ--RGVAKOIAAVO-RWGTNKGCREMASDTSPENTISOKVHOALG-----fkqi fde<br/> -----fgeikeyenpyhlaqlvdlinycnieakldikaeqddifqIENYYNRRKGQFWALENEKVVGSI-----ALLRIDDKTAVLKK--FFTYPKYGNPRLGRKLFERFLFARASKFTRIVLDTPEKEKRSHFFYENQFKQITRdeIdvdyiFPDRDSRIYVKLLF-</p> <p>FEETERVIFYRKR-----c<br/> LDVDYIFPDRDSRIYVKLL-</p> <p><b>BLAST:</b> aliSize=40 (resi) iden=14.47% (22/152) simi=26.32% (40/152)<br/> lvprgshmdirqmknkthlehwrglrkqlwpghpddahladgeeilqadhlas-----FIAMADGVAIGFADASIRHdyvngcdsSPVVFLEGIIFVLSFRQ--RGVAKOIAAVORWGTNKGCREMASDTSPENTISOKV<br/> -----fgeikeyenpyhlaqlvdlinycnieakldikaeqddifqienyyqnrkgqfWALENEKVVGSIALLRID-----DKTAVLKKFFTYPKYGNPRLGRKIFERFLFARASKFTRIVLDTPEKEKRSHFF</p> <p>HOALGFEETER-----vifyrkr<br/> YENQFKQITRdeIdvdyiFPDRDSRIYVKLL-----</p> <p><b>Proposed:</b> aliSize=137 (resi) RMSD=2.08 (Å)<br/> lvprGSHMDIRMNKT--HLEHWRGRLKQLWP-----GHPddAhIAdGEEILQ---ADHLASFIAMADGVAIGFADASIRHdyvngcdsSPVVFLEGIIFVLSFRQ--RGVAKOIAAVORWGTNKGCREMASDTSPENTISOKVHOALGFE-----TERVIFYRKR-c<br/> -----FGG-EIKEYENPyHLAQLVDIINYQNieakldIKM--EQ-DIIFQIENyyqNRKGQFWALENEKVVGSIALLRID-----DKTAVLKKFFTYPKYGNpVRLGRKIFERFLFARASKFTRIVLDTPEKEKRSHFFYENQFKQITRdeIdvdyiFPDRDSRIYVKLLF-</p> |
| 139 | <p>1s60A (152)</p> <hr/> <p>2fiwA (160)</p> | C | 14.47 | <p><b>TM-align:</b> aliSize=123 (resi) RMSD=2.40 (Å)<br/> lvprgSHMDIRMNKTHLEHWRGLRKQ-L-----GHPddAhIAdGEEILQ---ADHLASFIAMADGVAIGFADASIRHdyvngcdsspVVFLEGIIFVLSFRQ--RGVAKOIAAVORWGTNKGCREMASDTSpeNtISOKVHOALGFEETERVIFYRkr-----<br/> -----ghvSTPALRYPYLPEDAAVTAAIFVAsIeqltaddyseeqeaVASAA--DEAKFAARLS-G--QLTLIATLQGVVPGFASLKG-----PDHIDLHYHEDYVGDVGTTLIDALEKLAGARALILTVAS--D-NAAEFFAKRYVAKQRNTVS---ingewl anttksl</p> <p><b>SARST:</b> aliSize=125 (resi) RMSD=6.02 (Å)<br/> lvprgshmdirqmknkthlehwrglrkqlwpghpddahlad-----GEEILOADHLASFIAMADGVAIGFADASIRHdyvngcdsspVVFLEGIIFVLSFRQ--RGVAKOIAAVORWGTNKGCREMASDTSpeNtISOKVHOALGFEETERVIFYR-----krc<br/> -----ghvstPALRYPYLPEDAAVTAAIFVAsIEQLTADDYSEEQEEVAsaadeAKFAARLSGQLTLIATLQGVVPGFASLKGPDHIDL-----YHEDYVGDVGTTLIDALEKLAGARALILTVAS--NAAEFFAKRYVAKQRNTVSingewl anttksl---</p> <p><b>BLAST:</b> aliSize=43 (resi) iden=14.47% (22/152) simi=28.29% (43/152)<br/> lvprgshmdirqmknkthlehwrgl-----RKOLPQHPDahIAdGEEILOADHLASFIAMADGVAIGFADASIRHdyvngcdsspVVFLEGIIFVLSFRQ--RGVAKOIAAVORWGTNKGCREMASDTS-----<br/> -----ghvstPALRYPYLPEDAAVTAAIFVAsieqltaddyseeQOEAVASAA--EAKFAARLSGQLTLIATLQGVVPGFASLKGPDHIDL-----LYHEDYVGDVGTTLIDALEKLAGARALILTVASdnaaeffakryvakqrntvsingewl</p> <p>-----pentisqkvhqualgfeetervifyrkr<br/> anttksl-----</p> <p><b>Proposed:</b> aliSize=126 (resi) RMSD=1.88 (Å)<br/> lvprgshmdirqmknkthlehwrglrkqlwpghpddahlad-----GHPddAhIAdGEEILQ---ADHLASFIAMADGVAIGFADASIRHdyvngcdsspVVFLEGIIFVLSFRQ--RGVAKOIAAVORWGTNKGCREMASDTSpeNtISOKVHOALGFE-----TERVIFYRKR-c<br/> -----ghvmstPALRYPYLPEDAAVTAAIFVAsIeqltaddyseeqeaVASAA--DEAKFAARLS-G--QLTLIATLQGVVPGFASLKG-----PDHIDLHYHEDYVGDVGTTLIDALEKLAGARALILTVAS--D-NAAEFFAKRYVAKQRNTVSingewl anttksla-</p>                                                     |
| 140 | <p>1s60A (152)</p> <hr/> <p>2k5tA (128)</p> | C | 15.63 | <p><b>TM-align:</b> aliSize=121 (resi) RMSD=2.62 (Å)<br/> lvprgSHMDIRMNKTHLEHWRGRLKQLWPgHPDdAhIAdGEEILQ---ADHLASFIAMADGVAIGFADASIRHdyvngcdsspVVFLEGIIFVLSFRQ--RGVAKOIAAVORWGTNKGCREMASDTSPE--NTISOKVHOALGFEETERVIFYRkr-----<br/> -----MkLTIIRLEKfSDQDRIDLQKIWP-EYSP-S--S-L-QV--DDNHRIYARFNERLLAAVRVTL-SG-----TEGALDSLRLREVTRRRGVGQYILEELRNPN--VSCWWMAdaGVEDRGVMTAFMOALGHTTQGG-----wckcg</p> <p><b>SARST:</b> aliSize=94 (resi) RMSD=6.34 (Å)<br/> lvprgshmdirqmknkthlehwrglrkqlwpghpdda-----HLADGEEILOADHL-----ASFIIAMADGVAIGFADASIRHdyvngcdsspVVFLEGIIFVLSFRQ--RGVAKOIAAVORWGTNKGCREMASD--TSPENTISOKVHOALGFE-----tevifyrkr<br/> -----mkltiirlekfsDQDRIDLQKIWP-EYspsslqddnhRIYARFNERLLAAVRVTL-S-----GTEGALDSLRLREVTRRRGVGQYILEE--EVLRNPNVSCWWMAdaGVEDRGVMTAFMOALGHTTqggwckcg-----</p> <p><b>BLAST:</b> aliSize=24 (resi) iden=13.28% (17/128) simi=18.75% (24/128)<br/> lvprgshmdirqmknkthlehwrglrkqlwpghpddahladgeeilqadhlasfiamadgvaigfadasirhdyvngcdsspVVF-----LEGIIFVLSFRQ--RGVAKOIAAVORWGTNKGCREMASDTSPE<br/> -----mkltiirlekfsdqdridlqkiwpeyspsslqddnhriyaarfnerllaaavrvtlsgtegaLEGIIFVLSFRQ--RGVAKOIAAVORWGTNKGCREMASDTSPE</p> <p>ISOKVHOALGFE-----eetervifyrkr<br/> VMTAFMOALGHTTqggwckcg-----</p> <p><b>Proposed:</b> aliSize=121 (resi) RMSD=2.06 (Å)<br/> lvprgshmdirqmknkthlehwrglrkqlwpghpddahladgeeilqadhlasfiamadgvaigfadasirhdyvngcdsspVVFLEGIIFVLSFRQ--RGVAKOIAAVORWGTNKGCREMASDTS--PE--NTISOKVHOALGFEETERVIFYRKR-c<br/> -----MkLTIIRLEKfSDQDRIDLQKIWP-EYSP-S--S-L-QV--DDNHRIYARFNERLLAAVRVTL-SG-----TEGALDSLRLREVTRRRGVGQYILEELRNPNVSCWWMAdaGVEDRGVMTAFMOALGHTTQGGWCKCGc--</p>                                                                                                                                                                             |

|     |                                             |   |       |                                                                                                                                                                                                                                                                                                                                                                                                                                                                                                                                                                                                                                                                                                                                                                                                                                                                                                                                                                                                                                                                                                                                                                                                                                                                                                                                                                                                                                                                                                                                                                                                                                                                                                                                                                                                                         |
|-----|---------------------------------------------|---|-------|-------------------------------------------------------------------------------------------------------------------------------------------------------------------------------------------------------------------------------------------------------------------------------------------------------------------------------------------------------------------------------------------------------------------------------------------------------------------------------------------------------------------------------------------------------------------------------------------------------------------------------------------------------------------------------------------------------------------------------------------------------------------------------------------------------------------------------------------------------------------------------------------------------------------------------------------------------------------------------------------------------------------------------------------------------------------------------------------------------------------------------------------------------------------------------------------------------------------------------------------------------------------------------------------------------------------------------------------------------------------------------------------------------------------------------------------------------------------------------------------------------------------------------------------------------------------------------------------------------------------------------------------------------------------------------------------------------------------------------------------------------------------------------------------------------------------------|
| 141 | <p>1s60A (152)</p> <hr/> <p>3d3sA (159)</p> | C | 13.82 | <p><b>TM-align:</b> aliSize=132 (resi) RMSD=2.68 (Å)<br/> lvprgsHMDIROMNKTHLEHWGRK-Q--WPgHppddAhADGEEILOADHLASFTIADVAIGFADASTRHdyvngcdsSPVFLGTFVLPSPFRORGVAKQIIAAVORW-GTNkGCREMASDTSPEPTISOKVHOALGF---EETERVIF--YRKRc-----<br/> -----RYHLPPRRNDGAATHQVSECPpDLN---S-YAYLLLCEHHAHTCVVAVESpGRIDGfVSYLLPTR-----PDVLFVWQVAHSRAHGRLGRA-LGHILERqECR-HVHLETTVGDQAARRTFAGLAGergaHVSSEQPffdrqafggadhdelirigpf</p> <p><b>SARST:</b> aliSize=128 (resi) RMSD=5.30 (Å)<br/> lvprgsh-MDIROMNKTHLEHWGRKOLW--PGHPDDAHADGEEILOADHLASFIAMADVAIGFADASTRHdyvngcdsSPVFLGTFVLPSPFRORGVAKQIIAAVORWGTNKGCREMASDTSPEPTISOKVHOALGF---LfeeterVIFYRKR-----c<br/> -----rYHLPPRRNDGAATHQVSECPpDLNLSLYAYLLCEHHA---TCVVAESpGRIDGfVSYLLP-----TRPDVLFVWQVAHSRAHGRLGRA-GHILEKQECRH-VHLETTVGDQAARRTFAGlageR-----AHVSEQPffdrqafggadhdelirigpf-</p> <p><b>BLAST:</b> aliSize=12 (resi) iden=4.61% (7/152) simi=7.89% (12/152)<br/> lvprgshmdi rqnkthlehwgrl r kqlwpghpddahl adgee ilqadhlasfi amadgvaigfadas irhdyvngcds spvflg t fvlps frqrgvakqlia avqrgwt nkgc-----<br/> -----ryh l rpprrndgaa i hqlvsecppdl nslayl l lcehha tcvvaesp g r idgfvsayll p t rpdv lfvwq</p> <p>-----EMASDTSPEPTISOKVHOALGFfeeter-----ifyrkr<br/> vavhsrarghrlgralghilerqecrhVHLETTVGDQAARRTFAGLA---GERgahvseqpffdrqafggadhdelirigpf-----</p> <p><b>Proposed:</b> aliSize=132 (resi) RMSD=2.08 (Å)<br/> lvprgsHMDIROMNKTHLEHWGRK-Q--WPgHppddAhADGEEILOADHLASFTIADVAIGFADASTRHdyvngcdsSPVFLGTFVLPSPFRORGVAKQIIAAVORW-GTNkGCREMASDTSPEPTISOKVHOALGF---EETERVIF--YRKRc-----IFYRKR-Cc<br/> -----RYHLPPRRNDGAATHQVSECPpDLN---S-YAYLLLCEHHAHTCVVAVESpGRIDGfVSYLLPTR-----PDVLFVWQVAHSRAHGRLGRAMLGHILERqECR-HVHLETTVGDQAARRTFAGLAGergaHVSSEQPffdrqafggadhdelirigpf-</p>                                                                                                                 |
| 142 | <p>1s60A (152)</p> <hr/> <p>2pr8A (173)</p> | C | 14.47 | <p><b>TM-align:</b> aliSize=139 (resi) RMSD=3.35 (Å)<br/> lvprgsHMDIROMNKTHLEHWGRKOLWP-----G-HPDD--AHLADGEEILO--AD-HLASFIAMADVAIGFADASTRHD---YVNGCDSSPVFLGTFVLPSPFRORGVAKQIIAAVORWGTNKGCREMASDTSPEPTISOKVHOALGFfeeterVIFYRKRc-----<br/> -----D-SVTLRLNTEHDLAMLYEWLNRSHIvewwggEeARPTlaDVQEQYL--PSvLAQeSVTPYIAMLNCEPIGYAQSYVALGSGDGWEEETDPGRGIDLsIANasQLGKGLGtKLVRAVEL-LF--NDPEVTKIOTDPSNSLRAIRCYEKAGFERQGTVTTpdgpavymvqtrqafe</p> <p><b>SARST:</b> aliSize=137 (resi) RMSD=5.21 (Å)<br/> lvprgs-HMDIROMNKTHLEHWGRKOLWP-----GHPDDAHLADGEEILOADH-LASFIAMADVAIGFADASTRHDYVNGCDSSPV--VFLGTFVLPSPFRORG----VAQOLIIAVORWGTNKGCREMASDTSPEPTISOKVHOALGFfeeterVIF-----yrkr<br/> -----dSVTLRLNTEHDLAMLYEWLNRSHIvewwggEeARPTLADVQEQYLPVLAQESVTPYIAMLNCEPIGYAQSYVALGSGDGWEEETDPGRGIDLsIANASQlkgIGTLVRAVELLFDNDPEVTKIOTDPSNSLRAIRCYEKAGFERQGTVTTpdgpavymvqtrqafe-----</p> <p><b>BLAST:</b> aliSize=66 (resi) iden=23.03% (35/152) simi=43.42% (66/152)<br/> lvprgshmdirq-----MKNKTHLEHWGRl r kqlwpghpddahl adgee ilqadhlasfi amadgvaigfadas irhdyvngc dsspv flg t fvlps frqrgvakqlia avqrgwt nkgc rmas dtspe pti sokvhoal g f e e t e r v i f y r k r c -----<br/> -----dsvtlrlntehdlamlyewlnrshivewwggEeARPTlaDVQEQYLPVLAQESVTPYIAMLNCEPIGYAQSYVALGSGDGWEEETDPGRGIDLsIANASQlkgIGTLVRAVELLFDNDPEVTKIOTDPSNSLRAIRCYEKAGFERQGTVTTpdgpavymvqtrqafe-----<br/> ---eterVIFYRKRc<br/> qafe-----</p> <p><b>Proposed:</b> aliSize=137 (resi) RMSD=2.74 (Å)<br/> lvprgs-HMDIROMNKTHLEHWGRKOLWP-----G-HPDD--AHLADGEEILO--AD-HLASFIAMADVAIGFADASTRHD---YVNGCDSSPVFLGTFVLPSPFRORGVAKQIIAAVORWGTNKGCREMASDTSPEPTISOKVHOALGFfeeterVIF-----IFYRKRc-----c<br/> -----dSVTLRLNTEHDLAMLYEWLNRSHIvewwggEeARPTlaDVQEQYL--PSvLAQeSVTPYIAMLNCEPIGYAQSYVALGSGDGWEEETDPGRGIDLsIANASQlkgIGTLVRAVELLFDNDPEVTKIOTDPSNSLRAIRCYEKAGFERQGTVTTpdgpavymvqtrqafe-----</p> |
| 143 | <p>1s60A (152)</p> <hr/> <p>2fl4A (147)</p> | N | 12.24 | <p><b>TM-align:</b> aliSize=114 (resi) RMSD=3.29 (Å)<br/> lvprgshmdi rqnkthlehwgrl r kqlwpghpddahl adgee ilqadhlasfi amadgvaigfadas irhdyvngcds spvflg t fvlps frqrgvakqlia avqrgwt nkgc rmas dtspe pti sokvhoal g f e e t e r v i f y r k r c -----<br/> -----gmeihfekvtsdnrkavenlqvf-aEQqAFIE-SMAENLKSdqFPewESAGIYDGNQLGYMYGRWOD-----GRVWDRFLIDQRFGQGYGAACrLLMLKLIeKYQTNKLYLSVYDTNSSAIRLYQLGfVFNGLDtnGermewthq</p> <p><b>SARST:</b> aliSize=128 (resi) RMSD=11.98 (Å)<br/> lvprgs--HMDIROMNKTHLEHWGRKOLWPghpddahl adgee ilqadhlasfi amadgvaigfadas irhdyvngcds spvflg t fvlps frqrgvakqlia avqrgwt nkgc rmas dtspe pti sokvhoal g f e e t e r v i f y r k r c -----<br/> -----gmEIHFEKVTSdnrKAVENLQVFAEQqAFIEsMAENLKSdqFPewESAGIYDGNQLGYMYGR---WODR---VWDRFLIDQRFGQGYGAACrLLMLKLIeKYQTNKLYLSVYDTNSSAIRLYQLGfVFNGLDtnGermewthq-----</p> <p><b>BLAST:</b> aliSize=32 (resi) iden=10.20% (15/147) simi=21.77% (32/147)<br/> lvprgshmdi rqnkthlehwgrl r kqlwpghpddahl adgee ilqadhlasfi amadgvaigfadas irhdyvngcds spvflg t fvlps frqrgvakqlia avqrgwt nkgc rmas dtspe pti sokvhoal g f e e t e r v i f y r k r c -----<br/> -----gmeihfekvtsdnrkavenlqvf-aEQqAFIEsMAENLKSdqFPewESAGIYDGNQLGYMYGRWOD-----GRVWDRFLIDQRFGQGYGAACrLLMLKLIeKYQTNKLYLSVYDTNSSAIRLYQLGfVFNGLDtnGermewthq</p> <p>CREMASDTSPEPTISOKVHOALGF-----eetervifyrkr<br/> YLSVY-DT---NSSAIRLYQLGfVFNGLDtnGermewthq-----</p> <p><b>Proposed:</b> aliSize=127 (resi) RMSD=2.48 (Å)<br/> lvprgsHMDIROMNKTHLEHWGRKOLW--PGHPDDAHADGEEILOADHLASFIAMADVAIGFADASTRHdyvngcdsSPVFLGTFVLPSPFRORGVAKQIIAAVORWGTNKGCREMASDTSPEPTISOKVHOALGFfeeterVIF-----IFYRKRc-----<br/> -----MEIHFEKVTSdnrKAVENLQVFAEQqAFIEsMAENLKSdqFPewESAGIYDGNQLGYMYGRWOD-----GRVWDRFLIDQRFGQGYGAACrLLMLKLIeKYQTNKLYLSVYDTNSSAIRLYQLGfVFNGLDtnGermewthq-----</p>                                 |



|     |                                       |   |       |                                                                                                                                                                                                                                                                                                                                                                                                                                                                                                                                                                                                                                                                                                                                                                                                                                                                                                                                                                                                                                                                                                                                                                                                                                                                                                                                                                                                                                                                                                                                                                                                                                                                                                                                                                                                                                                                                                                                                                                               |
|-----|---------------------------------------|---|-------|-----------------------------------------------------------------------------------------------------------------------------------------------------------------------------------------------------------------------------------------------------------------------------------------------------------------------------------------------------------------------------------------------------------------------------------------------------------------------------------------------------------------------------------------------------------------------------------------------------------------------------------------------------------------------------------------------------------------------------------------------------------------------------------------------------------------------------------------------------------------------------------------------------------------------------------------------------------------------------------------------------------------------------------------------------------------------------------------------------------------------------------------------------------------------------------------------------------------------------------------------------------------------------------------------------------------------------------------------------------------------------------------------------------------------------------------------------------------------------------------------------------------------------------------------------------------------------------------------------------------------------------------------------------------------------------------------------------------------------------------------------------------------------------------------------------------------------------------------------------------------------------------------------------------------------------------------------------------------------------------------|
| 144 | <p>1s60A (152)</p> <p>2f14A (147)</p> | C | 11.56 | <p><b>TM-align:</b> aliSize=114 (resi) RMSD=3.29 (Å)<br/> lvprgshmdi r qmknk thlehwrglr-----KQ1-WP-GHPDDAHLADGEEILQADHLASFIAMADGVAIGFADASIRHDYVNGCDSSPVVFELEGIFVLPSFRORVAKOLI-AAVORWGTNKGCREMASDTSPE NTI SOKVHVALGFEETERVIFYRkrcc-----<br/> -----gmeihfekvtsdnrkavenlqvfaEQqAFIE-SMAENLKE-SDQFPWESAGIYDGNQLIGYAMYGRWOD-----GRVWDRFLIDQRFOGQYGAACrLLMLKLI EK YQTNKLYLSVYDTNSSA IRLYQQLG VFN GELDTNG---e rvmewthq</p> <p><b>SARST:</b> aliSize=128 (resi) RMSD=11.98 (Å)<br/> lvprgs--HMDIROMNKThleHWRLRKQLWPGHPDDAHLADGEEILO--ADHLASFIAMADGVAIGFADASIRhdYVNGCdsspvVFELEGIFVLPSFRORVAKOLIAAVORWGTN-KGCREMASDTSPE NTI SOKVHVALGFEETERV-----ifyrkrcc<br/> -----gmEIHFEKVTSDN---RKAVENLQVFAEQqAFIESMAENLKEsdqFPWESAGIYDGNQLIGYAMYGR---WODGR-----VWDRFLIDQRFOGQYGAACRLLMLKLI EK YQTNKLYLSVYDTNSSA IRLYQQLG VFN GELd tnger vmewthq-----</p> <p><b>BLAST:</b> aliSize=32 (resi) iden=10.20% (15/147) simi=21.77% (32/147)<br/> lvprgshmdi r qmknk thlehwrglrkqlwpgphddahladgeeilqadhlasfiamadgvaigfadasirhdYVNGCDSSPVVFELEGIFVLPSFRORVAKOLI-AAVORWGTNKGCREMASDTSPE NTI SOKVHVALGFEETERV-----L TAAVORWGTNKG<br/> -----gmeihfekvtsdnrkavenlqvfaeqqafiesmaenlkesdqfpewesagi ydgnqligyamygrwqdrVFELEGIFVLPSFRORVAKO-----L TAAVORWGTNKG<br/> CREMASDTSPE NTI SOKVHVALGFEETERVIFYRkrcc<br/> YLSVY-DT---NSSA IRLYQQLG VFN GELd tnger vmewthq-----</p> <p><b>Proposed:</b> aliSize=111 (resi) RMSD=2.36 (Å)<br/> lvprgshmdi r qmknk thlehwrglrkqlw-----P-----ghP-DDAHLADGEEILQADHLASFIAMADGVAIGFADASIRHDYVNGCDSSPVVFELEGIFVLPSFRORVAKOLIAAVORWGT-NKGCREMASDTSPE NTI SOKVHVALGFEETERV-----RVIFYRkrcc<br/> -----gmeihfekvtsdnrkavenlqvfaeqq--AfIESMAENLKE-SDQFPWESAGIYDGNQLIGYAMYGRWOD-----GRVWDRFLIDQRFOGQYGAACRLLMLKLI EK YQTNKLYLSVYDTNSSA IRLYQQLG VFN GELd tnger VMEWTHQ----</p>                                                                                                                                                                                                                           |
| 145 | <p>1s60A (152)</p> <p>1b6bA (168)</p> | C | 12.50 | <p><b>TM-align:</b> aliSize=128 (resi) RMSD=3.13 (Å)<br/> lvprgshMDIROMNKThLEHWR-G--LRK-----QLWPgHPDDAHLADGEEILOADHLASFIAMADGVAIGFADASIRHDYVNGCDSSPVVFELEGIFVLPSFRORVAKOLI-AAVORWGTNKGCREMASDTSPE NTI SOKVHVALGFEETERVIFYRkrcc-----<br/> -----ANEFNCLTPEDAAGVFeIerEAFisvsgnCPNL-L---De--VQ-HF--TLCPeLSLGFVEVRLVA--IIGSLWDEERL---tqeslalhrprGHSAHHALAHRSFRCQCKGSLWRYLhHVGAQPAVRAVLMCED--A-LVPFYQRFQHPAGPCAIV---vgs1tftemhcslrghaal</p> <p><b>SARST:</b> aliSize=97 (resi) RMSD=7.32 (Å)<br/> lvprgshmdi r qmknk thlehwrglrkqlwpgphddahladgeeilqadhla-----SFIAMADGVAIGFADASIRHDYVNGCDSSPVVFELEGIFVLPSFRORVAKOLI-AAVORWGTN-KGCREMASDTSPE NTI SOKVHVALGFEETERVIFYRkrcc-----<br/> -----anefncltpedaagvfeiereafisvsgncplnldvqhfltlcpeLSLGFVEVRLVA--IIGSLWDEERL---tqeslalhrprGHSAHHALAHRSFRCQCKGSLWRYLhHVGAQPAVRAVLMCEDA---LVPFYQRFQHPAGPCAIV---vgs1tftemhcslrghaal</p> <p>ALGFEET-----TERVIFYRKR-----c<br/> RFGHPagpcAivvgSLTFTEMHCSlrghaal-</p> <p><b>BLAST:</b> aliSize=11 (resi) iden=5.26% (8/152) simi=7.24% (11/152)<br/> lvprgshmdi r qmknk thlehwrglrkqlwpgphddahladgeeilqadhlasfiamadgvaigfadasirhdYVNGCDSSPVVFELEGIFVLPSFRORVAKOLI-AAVORWGTNKGCREMASDTSPE NTI SOKVHVALGFEETERVIFYRkrcc-----<br/> -----anefncltpedaagvfeiereafisvsgncplnldvqhfltlcpeLSLGFVEVRLVA--IIGSLWDEERL---tqeslalhrprGHSAHHALAHRSFRCQCKGSLWRYLhHVGAQPAVRAVLMCEDA---LVPFYQRFQHPAGPCAIV---vgs1tftemhcslrghaal</p> <p>I<br/> LwrylhvgaqavrravlmcedalvpfyqrfghpagpcAivvgSLTFTEMHCSlrghaal-----aavqrgwtngkcremasdtspe NTI SOKVHVALGFEETERVIFYRkrcc</p> <p><b>Proposed:</b> aliSize=126 (resi) RMSD=2.57 (Å)<br/> lvprgshMDIROMNKThLEHWR-G--LrkQ-----LW-pgHPDDAHLADGEEILOADHLASFIAMADGVAIGFADASIRHDYVNGCDSSPVVFELEGIFVLPSFRORVAKOLI-AAVORWGTNKGCREMASDTSPE NTI SOKVHVALGFEETERVIFYRkrcc-----<br/> -----ANEFNCLTPEDAAGVFeIerE--Afisvsgncpln-L---De--VQ-HF--TL-CPeLSLGFVEVRLVA--IIGSLWDEERL---tqeslalhrpr---GHSAHHALAHR-SFRCQCKGSLWRYLhHVGAQPAVRAVLMCED--A-LVPFYQRFQHPAGPCAIVvgSLtftEMHCSlrghaal</p> <p>----c<br/> haal-</p> |
| 146 | <p>1s60A (152)</p> <p>2pr1A (152)</p> | C | 8.55  | <p><b>TM-align:</b> aliSize=128 (resi) RMSD=3.10 (Å)<br/> lvprgshMDIROMNKThLEHWRGLRKQLWPGHPDDAHLADGEEILOADHLASFIAMADGVAIGFADASIRHDYVNGCDSSPVVFELEGIFVLPSFRORVAKOLI-AAVORWGTNKGCREMASDTSPE NTI SOKVHVALGFEETERVIFYRkrcc-----<br/> -----MTKVERLLIN-YKTL EEFKFKKEYIQELSMLEELqdnii--ndST---SPFYGIYFGDKLVARMSLYQVNGKSNPYFhRQDYLELWKLEVLPGYQNRGYGRAVVEFAKS-FK---M-PIRTNPR--MKS-AEFWNKMNFKTKYdmarDKGE-----dpliwHPdmdr</p> <p><b>SARST:</b> aliSize=130 (resi) RMSD=9.13 (Å)<br/> lvprg--SHMDIROMNKThleHWRLRKQLWPGHPDDAHLADGEEILOADHLASFIAMADGVAIGFADASIR---HDYVNGCDSSPVVFELEGIFVLPSFRORVAKOLI-AAVORWGTNKGCREMASDTSPE NTI SOKV-----HOALGFEETERVIFYRKR-----c<br/> -----mTKVERLLIN-----YKTL EEFKFKKEYIQELSMLEELqdnii--ndST---SPFYGIYFGDKLVARMSLYQVNGKSNPYFhRQDYLELWKLEVLPGYQNRGYGRAVVEFAKS-FK---M-PIRTNPR--MKS-AEFWNKMNFKTKYdmarDKGE-----EDPLIWHPDmdr-</p> <p><b>BLAST:</b> aliSize=14 (resi) iden=5.26% (8/152) simi=9.21% (14/152)<br/> lvprgs-----mtkverllinyktleefkfkkeyiqelsmleelqdniiendstspfygiyfgdklvarmslyqvgkspYFDNRQ---DYLELWKLEVLPGYQNRGYGRAVVEFAKS-FK---M-PIRTNPR--MKS-AEFWNKMNFKTKYdmarDKGE-----dpliwHPdmdr-----<br/> gvaigfadasirhdYVNGCDSSPVVFELEGIFVLPSFRORVAKOLIAAVORWGTNKGCREMASDTSPE NTI SOKVHVALGFEETERVIFYRkrcc</p> <p><b>Proposed:</b> aliSize=126 (resi) RMSD=2.38 (Å)<br/> lvprgshMDIROMNKThLEHWRGLRKQLWPGHPDDAHLADGEEILOADHLASFIAMADGVAIGFADASIRHDYVNGCDSSPVVFELEGIFVLPSFRORVAKOLI-AAVORWGTNKGCREMASDTSPE NTI SOKVHVALGFEETERVIFYRKR-----<br/> -----MTKVERLLIN--NyKT-LEEFKFKKEYIQ-ELSMLEELqdniiend--S-TS---SPFYGIYFGDKLVARMSLYQVNGKSNPYFhRQDYLELWKLEVLPGYQNRGYGRAVVEFAKS-FK---M-PIRTNPR--MKS-AEFWNKMNFKTKYdmarDKGEdPLIWHPDmdr-</p>                                                                                                                                                                                                                                                                                                                                            |

|     |                                       |   |       |                                                                                                                                                                                                                                                                                                                                                                                                                                                                                                                                                                                                                                                                                                                                                                                                                                                                                                                                                                                                                                                                                                                                                                                                                                                                                                                                                                                                                                                                                                                                                                                                                                                                                                                                                                                                                                                  |
|-----|---------------------------------------|---|-------|--------------------------------------------------------------------------------------------------------------------------------------------------------------------------------------------------------------------------------------------------------------------------------------------------------------------------------------------------------------------------------------------------------------------------------------------------------------------------------------------------------------------------------------------------------------------------------------------------------------------------------------------------------------------------------------------------------------------------------------------------------------------------------------------------------------------------------------------------------------------------------------------------------------------------------------------------------------------------------------------------------------------------------------------------------------------------------------------------------------------------------------------------------------------------------------------------------------------------------------------------------------------------------------------------------------------------------------------------------------------------------------------------------------------------------------------------------------------------------------------------------------------------------------------------------------------------------------------------------------------------------------------------------------------------------------------------------------------------------------------------------------------------------------------------------------------------------------------------|
| 147 | <p>1s60A (152)</p> <p>1xebA (149)</p> | C | 10.74 | <p><b>TM-align:</b> aliSize=122 (resi) RMSD=2.63 (Å)<br/> lvprgshMDIROMKTHLEHWRGLRkqlwpghpDDAHLADGEEILQADHLASFIAMADGVAIGFADASIRH-DYvngcdsSPVVFLEGI FVLPSFRORVAKOLIAAVORWGTNKGCR-EMASDTSPenTisKVVHQAIGFEETERVIFyrkrc-----<br/> -----SLDWTCKhhdLTlKEIYALLOLrTeVfVveqkCPYQ--EV-DG--LDL--VGDTHHL--WRXQLLAYLRLLDpvrHE-----GQVVI GRVSSSAAGGCLGHOL-ERALQAAERLWLDtPVYLSAQ--H-LAYYGR-YGFVAVTEVY----leddiphigra</p> <p><b>SARST:</b> aliSize=123 (resi) RMSD=8.19 (Å)<br/> lvprgshMDIROMKTHLEHWRGLRkqlwpghpDDAHLADGEEILQADHLASFIAMADGVAIGFADASTRHdyvngcdsSPVVFLEGI FVLPSFRORVAKOLIAAVORWGTNKGCR-EMASDTSPenTisKVVHQAIGFEETERVIFyrkrc-----rkrc<br/> -----SLDWTCKhhdLTlKEIYALLOLrTeVfVveqkCPYQ--EV-DG--LDL--VGDTHHL--WRXQLLAYLRLLDpvrHE-----GQVVI GRVSSSAAGGCLGHOL-ERALQAAERLWLDtPVYLSAQ--H-LAYYGR-YGFVAVTEVY----leddiphigra</p> <p><b>BLAST:</b> aliSize=16 (resi) iden=5.48% (8/149) simi=10.96% (16/149)<br/> lvprgshmdi rqnkthlehwgrl rklwpghpddahladgeeilqadhl asfi amadgvaigfada--SIRHD-----yveeilloadtl asfi amadgvaigfada--SIRHD-----yv<br/> -----SLDWTCKhhdLTlKelyal lqlrtevfveqkcpqyevDCLDLVGDTHHL--WRXQLLAYLRLLDpvrHE-----GQVVI GRVSSSAAGGCLGHOL-ERALQAAERLWLDtPVYLSAQ--H-LAYYGR-YGFVAVTEVY----leddiphigra</p> <p>ngcdsspvvflegifvlpsfrqrgvakqliaavqrgwtngkcremasdtspentisqkvhqaigfeeterVifyrkrc</p> <p><b>Proposed:</b> aliSize=126 (resi) RMSD=2.44 (Å)<br/> lvprgshMDIROMKTHLEHWRGLRkqlwpghpDDAHLADGEEILQADHLASFIAMADGVAIGFADASIRH-DYvngcdsSPVVFLEGI FVLPSFRORVAKOLIAAVORWGT-NKGCRESMASDTSPenTisKVVHQAIGFEETERVIFyrkrc-----IFYKrc<br/> -----SLDWTCKhhdLTlKEIYALLOLrTeVfVveqkCPYQ--EV-DG--LDL--VGDTHHL--WRXQLLAYLRLLDpvrHE-----GQVVI GRVSSSAAGGCLGHOL-ERALQAAERLWLDtPVYLSAQ--H-LAYYGR-YGFVAVTEVY----leddiphigra</p>                                                                                                                              |
| 148 | <p>1s60A (152)</p> <p>2fckA (174)</p> | N | 8.55  | <p><b>TM-align:</b> aliSize=136 (resi) RMSD=3.06 (Å)<br/> lvprgs-----HMDIROMNKTHLEHWRGLRkqlwpghpDDAHLADGEEILQADHLASFIAMADGVAIGFADASIRHdyvngcdSSPVVFLEGI FVLPSFRORVAKOLIAAVORWGT-NKGCRESMASDTSPenTisKVVHQAIGFEETERVIFyrkrc-----rkrc<br/> -----tpdfqivtqRLQLRLITADEAeELVQCIRqSqtLHQwvDWFSqQEAEQFIQATRLNwvkaeAYGFGVFERQTQTLVGVAINEFYH-----TFNA-SGYWIG-DRYQROCYGKEALTALILFCFeRLELRLTRLEIVCDPENVPsQALALRCANREQLAPNrflyagep--kagivfslip</p> <p><b>SARST:</b> aliSize=129 (resi) RMSD=4.00 (Å)<br/> lvprgs-----HMDIROMNKTHLEHWRGLRkqlwpghpDDAHLADGEEILQADHLASFIAMADGVAIGFADASTRHdyvngcdsSPVVFLEGI FVLPSFRORVAKOLIAAVORWGT-NKGCRESMASDTSPenTisKVVHQAIGFEETERVIFyrkrc-----rkrc<br/> -----tpdfqivtqRLQLRLITADEAeELVQCIRqSqtLHQwvDWFSqQEAEQFIQATRLNwvkaeAYGFGVFERQTQTLVGVAINEFYH-----TFNA-SGYWIG-DRYQROCYGKEALTALILFCFeRLELRLTRLEIVCDPENVPsQALALRCANREQLAPNrflyagep--kagivfslip</p> <p><b>BLAST:</b> aliSize=24 (resi) iden=7.89% (12/152) simi=15.79% (24/152)<br/> lvprgshmdi rqnkthlehwgrl rklwpghpddahladgeeilqadhl asfi amadgvaigfadasirhdyvngcdsspvvfle-----tpdfqivtqRLQLRLITADEAeELVQCIRqSqtLHQwvDWFSqQEAEQFIQATRLNwvkaeAYGFGVFERQTQTLVGVAINEFYH-----TFNA-SGYWIG-DRYQROCYGKEALTALILFCFeRLELRLTRLEIVCDPENVPsQALALRCANREQLAPNrflyagep--kagivfslip</p> <p>AKOLIAAV-----ORWGTNKGCR-EMASDTS-PENTISOKVVHQAIGFEETERVIFyrkrc-----rkrc<br/> GKEALTALILFCFeRLELRLTRLEIVCDPENVPsQALALRCANREQLAPNrflyagep--kagivfslip</p> <p><b>Proposed:</b> aliSize=139 (resi) RMSD=2.60 (Å)<br/> LV-PRGSH--MDIROMNKTHLEHWRGLRkqlwpghpDDAHLADGEEILQADHLASFIAMADGVAIGFADASTRHdyvngcdSSPVVFLEGI FVLPSFRORVAKOLIAAVORWGT-NKGCRESMASDTSPenTisKVVHQAIGFEETERVIFyrkrc-----rkrc<br/> MTPDFQIVtqRLQLRLITADEAeELVQCIRqSqtLHQwvDWFSqQEAEQFIQATRLNwvkaeAYGFGVFERQTQTLVGVAINEFYH-----TFNA-SGYWIG-DRYQROCYGKEALTALILFCFeRLELRLTRLEIVCDPENVPsQALALRCANREQLAPNrflyagep--kagivfslip</p>        |
| 149 | <p>1s60A (152)</p> <p>2fckA (174)</p> | C | 9.21  | <p><b>TM-align:</b> aliSize=136 (resi) RMSD=3.06 (Å)<br/> lvprgs-----HMDIROMNKTHLEHWRGLRkqlwpghpDDAHLADGEEILQADHLASFIAMADGVAIGFADASIRHdyvngcdSSPVVFLEGI FVLPSFRORVAKOLIAAVORWGT-NKGCRESMASDTSPenTisKVVHQAIGFEETERVIFyrkrc-----rkrc<br/> -----tpdfqivtqRLQLRLITADEAeELVQCIRqSqtLHQwvDWFSqQEAEQFIQATRLNwvkaeAYGFGVFERQTQTLVGVAINEFYH-----TFNA-SGYWIG-DRYQROCYGKEALTALILFCFeRLELRLTRLEIVCDPENVPsQALALRCANREQLAPNrflyagep--kagivfslip</p> <p><b>SARST:</b> aliSize=129 (resi) RMSD=4.00 (Å)<br/> lvprgs-----HMDIROMNKTHLEHWRGLRkqlwpghpDDAHLADGEEILQADHLASFIAMADGVAIGFADASTRHdyvngcdsSPVVFLEGI FVLPSFRORVAKOLIAAVORWGT-NKGCRESMASDTSPenTisKVVHQAIGFEETERVIFyrkrc-----rkrc<br/> -----tpdfqivtqRLQLRLITADEAeELVQCIRqSqtLHQwvDWFSqQEAEQFIQATRLNwvkaeAYGFGVFERQTQTLVGVAINEFYH-----TFNA-SGYWIG-DRYQROCYGKEALTALILFCFeRLELRLTRLEIVCDPENVPsQALALRCANREQLAPNrflyagep--kagivfslip</p> <p><b>BLAST:</b> aliSize=24 (resi) iden=7.89% (12/152) simi=15.79% (24/152)<br/> lvprgshmdi rqnkthlehwgrl rklwpghpddahladgeeilqadhl asfi amadgvaigfadasirhdyvngcdsspvvfle-----tpdfqivtqRLQLRLITADEAeELVQCIRqSqtLHQwvDWFSqQEAEQFIQATRLNwvkaeAYGFGVFERQTQTLVGVAINEFYH-----TFNA-SGYWIG-DRYQROCYGKEALTALILFCFeRLELRLTRLEIVCDPENVPsQALALRCANREQLAPNrflyagep--kagivfslip</p> <p>AKOLIAAV-----ORWGTNKGCR-EMASDTS-PENTISOKVVHQAIGFEETERVIFyrkrc-----rkrc<br/> GKEALTALILFCFeRLELRLTRLEIVCDPENVPsQALALRCANREQLAPNrflyagep--kagivfslip</p> <p><b>Proposed:</b> aliSize=136 (resi) RMSD=2.58 (Å)<br/> lvprgsh-----MDIROMNKTHLEHWRGLRkqlwpghpDDAHLADGEEILQADHLASFIAMADGVAIGFADASTRHdyvngcdSSPVVFLEGI FVLPSFRORVAKOLIAAVORWGT-NKGCRESMASDTSPenTisKVVHQAIGFEETERVIFyrkrc-----rkrc<br/> -----mtpdfqivtqRLQLRLITADEAeELVQCIRqSqtLHQwvDWFSqQEAEQFIQATRLNwvkaeAYGFGVFERQTQTLVGVAINEFYH-----TFNA-SGYWIG-DRYQROCYGKEALTALILFCFeRLELRLTRLEIVCDPENVPsQALALRCANREQLAPNrflyagep--kagivfslip</p> |

|     |                                                           |   |       |                                                                                                                                                                                                                                                                                                                                                                                                                                                                                                                                                                                                                                                                                                                                                                                                                                                                                                                                                                                                                                                                                                                                                                                                                                                                                                                                                                                                                                              |
|-----|-----------------------------------------------------------|---|-------|----------------------------------------------------------------------------------------------------------------------------------------------------------------------------------------------------------------------------------------------------------------------------------------------------------------------------------------------------------------------------------------------------------------------------------------------------------------------------------------------------------------------------------------------------------------------------------------------------------------------------------------------------------------------------------------------------------------------------------------------------------------------------------------------------------------------------------------------------------------------------------------------------------------------------------------------------------------------------------------------------------------------------------------------------------------------------------------------------------------------------------------------------------------------------------------------------------------------------------------------------------------------------------------------------------------------------------------------------------------------------------------------------------------------------------------------|
| 150 | <p><b>ItiyA (157)</b></p> <hr/> <p><b>2g84A (189)</b></p> | C | 26.11 | <p><b>TM-align:</b> aliSize=116 (resi) RMSD=1.45 (Å)<br/> mndalhiglpplvqanneprvlaAPARMGYVLEVRANIAADGGPFAAVFERdSLLLAATNRVPGRCSAAHAEILALSLQAKDTHDLSadglpACEVTSAEPCVMCFGAVISGVRSLVCAARSDVEAIFGDE--GPR-PE-----nwm</p> <p>-----<br/> <b>ggleargi</b>tvttgllrdaacallreynacngviynarc</p> <p><b>SARST:</b> aliSize=143 (resi) RMSD=18.07 (Å)<br/> n-----HETFLKRAVTLACEGVNAIGGPFAGAVIVKDAIAGONNVTTSDPTAHAEVTAIRKACKVLAGAYODDIIYTSCEPCPCLGAIYWARPKAVFYAAEHTAAEAAGFDDsFIYKEIDKpaertipfvavtltelhsfqaawrnfankevl---</p> <p>-----keyl<br/> viynarc----</p> <p><b>BLAST:</b> aliSize=48 (resi) iden=23.23% (36/157) simi=30.97% (48/157)<br/> nhetflkravtlacegvn-----MNHHTFLKRAVTLACEGVNAIGGPFAGAVIVKDAIAGONNVTTSDPTAHAEVTAIRKACKVLAGAYODDIIYTSCEPCPCLGAIYWARPKAVFYAAEHTAAEAAGFDD-----KACKVlgayqlddciiYTSCEPCPCLGAIYWARPKAVFYAAEHTAAEAAGFDD-----FDDSFIYKEIDKpaertipfvavtltelhsfqaawrnfankevl---</p> <p>-----<br/> mndalhiglpplvqanneprvlaapearmgyvlelvraniADGGPFAAVFERdSLLLAATNRVPGRCSAAHAEILALSLQAKDTHDLSadglpACEVTSAEPCVMCFGAVISGVRSLVCAARSDVEAIFGDEgprPENWMGGLEARG-----ITVTTGLRDAACALLREYNACNG</p> <p>-----<br/> sfiykeidkpaertipfyqvvtltelhsfqaawrnfankeyl</p> <p>-----<br/> <b>Proposed:</b> aliSize=146 (resi) RMSD=1.49 (Å)<br/> mndalhiglpplvqanneprvlaAPARMGYVLEVRANIAADGGPFAAVFERdSLLLAATNRVPGRCSAAHAEILALSLQAKDTHDLSadglpACEVTSAEPCVMCFGAVISGVRSLVCAARSDVEAIFGDEgpr-----PENWMGGLeaRgITVTTGLRDAACALLREYNACNG</p> <p>-----keyl<br/> iynarc----</p> |
| 151 | <p><b>ItiyA (157)</b></p> <hr/> <p><b>IwwrA (154)</b></p> | C | 29.22 | <p><b>TM-align:</b> aliSize=108 (resi) RMSD=1.71 (Å)<br/> gshmgKYYELVLRREKRAFEK-EVVGAIIVKEEELSKAHNSVEELKDPTAHAEMLAKEACRRNTKYEGEELYVTLEPCIMSYALVLSIEKIFSLDK-----KHG--gvsvf-nl-----ldeptlnhrvkwyypleasells</p> <p>-----<br/> effkklrnnii</p> <p><b>SARST:</b> aliSize=97 (resi) RMSD=0.97 (Å)<br/> n-----HETFLKRAVTLACEGVNAIGGPFAGAVIVKDAIAGONNVTTSDPTAHAEVTAIRKACKVLAGAYODDIIYTSCEPCPCLGAIYWARPKAVFYAAEHTAAEAAGFDDsFIYKEIDKpaertipfvavtltelhsfqaawrnfankevl---</p> <p>-----<br/> -<b>l</b>tehlspfqawrnfankeyl</p> <p><b>BLAST:</b> aliSize=76 (resi) iden=33.12% (51/154) simi=49.35% (76/154)<br/> nh-----HETFLKRAVTLACEGVNAIGGPFAGAVIVKDAIAGONNVTTSDPTAHAEVTAIRKACKVLAGAYODDIIYTSCEPCPCLGAIYWARPKAVFYAAEHTAAEAAGFDDsFIYKEIDKPAEERTI--PFYQV-TLTELHSPFOAWRN---fankkeyl</p> <p>-----<br/> -<b>l</b>tehlspfqawrnfankeyl</p> <p><b>Proposed:</b> aliSize=134 (resi) RMSD=1.72 (Å)<br/> gshmgKYYELVLRREKRAFEK-EVVGAIIVKEEELSKAHNSVEELKDPTAHAEMLAKEACRRNTKYEGEELYVTLEPCIMSYALVLSIEKIFSLDKkhggvsv-----F--NiLDEPtLnHRVkwEYYPLeEASELSEfKklRnnii--</p>                                                                                                                                                                                                                                                                                                                                                                                                 |
| 152 | <p><b>ItiyA (157)</b></p> <hr/> <p><b>2b3jA (151)</b></p> | C | 29.14 | <p><b>TM-align:</b> aliSize=108 (resi) RMSD=1.81 (Å)<br/> mndihymtlAIEEKAAQ-LGEVIGAITKDEVLARAHNLRETLQOPTAHAEHIAERAAKVLGSRWLEGTLYVTLEPCVMCAITVMSRIPRVVYGDdpkggcsGslmnlqqsnfnhrAIVDKGVLKEACSTLLT</p> <p>-----<br/> ffknlran</p> <p><b>SARST:</b> aliSize=107 (resi) RMSD=3.42 (Å)<br/> n-----HETFLKRAVTLACEGVNAIGGPFAGAVIVKDAIAGONNVTTSDPTAHAEVTAIRKACKVLAGAYODDIIYTSCEPCPCLGAIYWARPKAVFYAAEHTAAEAAGFDDsFIYKEIDKpaertipfvavtltelhsfqaawrnfankevl---</p> <p>-----<br/> nfankeyl</p> <p><b>BLAST:</b> aliSize=55 (resi) iden=28.48% (43/151) simi=36.42% (55/151)<br/> nhetflkra-----MNHHTFLKRAVTLACEGVNAIGGPFAGAVIVKDAIAGONNVTTSDPTAHAEVTAIRKACKVLAGAYODDIIYTSCEPCPCLGAIYWARPKAVFYAAEHTAAEAAGFDD-----KACKVlgayqlddciiYTSCEPCPCLGAIYWARPKAVFYAAEHTAAEAAGFDD-----FDDSFIYKEIDKpaertipfvavtltelhsfqaawrnfankevl---</p> <p>-----<br/> mndihymtlAIEEKAAQ-LGEVIGAITKDEVLARAHNLRETLQOPTAHAEHIAERAAKVLGSRWLEGTLYVTLEPCVMCAITVMSRIPRVVYGDdpkggcsGslmnlqqsnfnhrAIVDKGVLKEACSTLLTffknlran</p> <p>-----<br/> qvtltelhsfqaawrnfankeyl</p> <p><b>Proposed:</b> aliSize=133 (resi) RMSD=1.59 (Å)<br/> m-----HETFLKRAVTLACEGVNAIGGPFAGAVIVKDAIAGONNVTTSDPTAHAEVTAIRKACKVLAGAYODDIIYTSCEPCPCLGAIYWARPKAVFYAAEHTAAEAAGFDDsFIYKEIDKPAEERTI--PFYQV-TLTELHSPFOAWRN---AnKKE---yl</p> <p>-----<br/> -<b>l</b>tehlspfqawrnfankeyl</p>                                                                                                                                    |

|     |                                                           |   |       |                                                                                                                                                                                                                                                                                                                                                                                                                                                                                                                                                                                                                                                                                                                                                                                                                                                                                                                                                                                                                                                                                                                                                                                                                                                                                                                                                                                                                                                                                                                                                                                                                                                                                                                              |
|-----|-----------------------------------------------------------|---|-------|------------------------------------------------------------------------------------------------------------------------------------------------------------------------------------------------------------------------------------------------------------------------------------------------------------------------------------------------------------------------------------------------------------------------------------------------------------------------------------------------------------------------------------------------------------------------------------------------------------------------------------------------------------------------------------------------------------------------------------------------------------------------------------------------------------------------------------------------------------------------------------------------------------------------------------------------------------------------------------------------------------------------------------------------------------------------------------------------------------------------------------------------------------------------------------------------------------------------------------------------------------------------------------------------------------------------------------------------------------------------------------------------------------------------------------------------------------------------------------------------------------------------------------------------------------------------------------------------------------------------------------------------------------------------------------------------------------------------------|
| 153 | <p><b>ItiyA (157)</b></p> <hr/> <p><b>2nx8A (168)</b></p> | C | 24.20 | <p><b>TM-align:</b> aliSize=109 (resi) RMSD=2.05 (Å)<br/> -----NHETFLKRAVTLACEGVNAGIGGFAGAVIKDGAIAECONNVTTSDPTAHAEVTAIRKACKVLGAYOIDDCLYTSCEPCPLGAIYWARPKAFYAAEHTdaaeafDDSFfi---YKe-Idknaeertipfvavltlthlsnfqawrnfankeyl-----<br/> sflmpysleeQTYFMQEALKESEKSLQ-KAEIIFICCVIKDGEIIGRCHAREESNOAIMHAEMMAINEANAHECNWRLDITTFVTIEPCVMCSGAIGLARIPHIYGASNQK-----KFGG-vdsLY-qI-----ltderlnhrvqvergllaadcanimqiffrqgrerkkiakhlke</p> <p><b>SARST:</b> aliSize=140 (resi) RMSD=16.54 (Å)<br/> n-----HETFLKRAVTLACEGVNAGIGGFAGAVIKDGAIAECONNVTTSDPTAHAEVTAIRKACKVLGAYOIDDCLYTSCEPCPLGAIYWARPKAFYAAEHTdaaeafDDSFfiY-KEIDKPAEERTIPFYOVTLTEHLSPFQAWRN-----fankkeyl<br/> -sflmpysleeQTYFMQEALKESEKSLQKAEIIFICCVIKDGEIIGRCHAREESNOAIMHAEMMAINEANAHECNWRLDITTFVTIEPCVMCSGAIGLARIPHIYGASNQK-----FGVDLSLYQILTDERLNHRVQVERGLLAADCANIMQTFfrqgrerkkiakhlke-----</p> <p><b>BLAST:</b> aliSize=43 (resi) iden=23.23% (36/157) simi=27.74% (43/157)<br/> nhetflkravtlacegvnagiggfagavikdgaiaeconnvttspdhahaevtairkackvlgayoiddcliytscepcplgaiywarpkafyaaeh-----tdaeagfddsfiykeidkpaertipfyqvltlthlsnfqawrnfankeyl<br/> -----sflmpysleeqtyfmqalkeseksqkiaeifigcviykdgeiigrchareesnoaimhaemmineanahecnwrlitfvtiepcvmcsaiqlariphiiygasnqkfggvdsllyqiltderlnhrvqvergllaadcanimqiffrqgrerkkiakhlke</p> <p><b>Proposed:</b> aliSize=132 (resi) RMSD=1.92 (Å)<br/> -----MNHETFLKRAVTLACEGVNAGIGGFAGAVIKDGAIAECONNVTTSDPTAHAEVTAIRKACKVLGAYOIDDCLYTSCEPCPLGAIYWARPKAFYAAEHT-----T-DAAEaafD-dSFivkEidknaeERTIPFY--O---V---tlteH-LSPFOAWRNFA--nkkeyl<br/> sflmpysleeQTYFMQEALKESEKSLQKAEIIFICCVIKDGEIIGRCHAREESNOAIMHAEMMAINEANAHECNWRLDITTFVTIEPCVMCSGAIGLARIPHIYGASNQKfggvdsllyqiltDerLNHR---Vq-VE---R-----GLLAADcaNimqTffr---QgRERKIAKHLIke-----</p>            |
| 154 | <p><b>ItiyA (157)</b></p> <hr/> <p><b>1z3aA (156)</b></p> | C | 25.64 | <p><b>TM-align:</b> aliSize=108 (resi) RMSD=1.79 (Å)<br/> -----NHETFLKRAVTLACEGVNAGIGGFAGAVIKDGAIAECONNVTTSDPTAHAEVTAIRKACKVLGAYOIDDCLYTSCEPCPLGAIYWARPKAFYAAEHTdaaeafDDSFfi---YKe-Idknaeertipfvavltlthlsnfqawrnfankeyl-----<br/> sevefSHEYWMRHALTLAKRAWDER-EVAVLHNNRVIGEGWRPIGRHDPTAHAEIMALROGGLMQNRIIDATLYVTLEPCVMCAIGAMIHSRIGRVFGARDAKTGAAGSImdvllhpgmnhrvitegiladecaallsdffrmrreqik</p> <p><b>SARST:</b> aliSize=99 (resi) RMSD=1.10 (Å)<br/> n-----HETFLKRAVTLACEGVNAGIGGFAGAVIKDGAIAECONNVTTSDPTAHAEVTAIRKACKVLGAYOIDDCLYTSCEPCPLGAIYWARPKAFYAAEHTdaaeafDDSFfiY-KEIDKPAEERTIPFYOVTLTEHLSPFQAWRN-----htdaaeagfddsfiykeidkpaertipfyqv<br/> -sevefSHEYWMRHALTLAKRAWDER-EVAVLHNNRVIGEGWRPIGRHDPTAHAEIMALROGGLMQNRIIDATLYVTLEPCVMCAIGAMIHSRIGRVFGARDAKTGAAGSImdvllhpgmnhrvitegiladecaallsdffrmrreqik-----</p> <p><b>BLAST:</b> aliSize=60 (resi) iden=26.45% (41/156) simi=38.71% (60/156)<br/> sevefSHEYWMRHALTLAKRAWDER-EVAVLHNNRVIGEGWRPIGRHDPTAHAEIMALROGGLMQNRIIDATLYVTLEPCVMCAIGAMIHSRIGRVFGARDAKTGAAGSImdvllhpgmnhrvitegiladecaallsdffrmrreqik<br/> qawrnfankeyl</p> <p><b>Proposed:</b> aliSize=135 (resi) RMSD=1.62 (Å)<br/> -----MNHETFLKRAVTLACEGVNAGIGGFAGAVIKDGAIAECONNVTTSDPTAHAEVTAIRKACKVLGAYOIDDCLYTSCEPCPLGAIYWARPKAFYAAEHT-----daaeafddsfiykeidkP-AE-E-RTIPFYOVTLTEHLSPFQAWRN--ANKK-----eyl<br/> sevefSHEYWMRHALTLAKRAWDER-EVAVLHNNRVIGEGWRPIGRHDPTAHAEIMALROGGLMQNRIIDATLYVTLEPCVMCAIGAMIHSRIGRVFGARDAKTGAAGSImdvllhpgmnhrvitegiladecaallsdffrmrreqik-----</p>                                                                                                                                                                                                                                          |
| 155 | <p><b>2p1jA (164)</b></p> <hr/> <p><b>1j53A (174)</b></p> | C | 29.27 | <p><b>TM-align:</b> aliSize=143 (resi) RMSD=1.75 (Å)<br/> TFVVLDFETIGLD-----POVDEIIEIGAVKIQQGOIV-DEYITLIKPSREISRKSSSETITGTOEMENKRSTEEVLPFLGFLEDSIIIVANNANFYRFLRLWIKKV-MGLDWER---RYPYITLALAKSLLKLRYSYSLDSVVEKLGgPFRHHRaldarvtaqvflrfvemmm-----<br/> ROIIVLITETGMNqigahyEGHKLEIGAVEVNRRLTgNNFVYLLKPDRLVDPEAFGVHGIADEFLLDKPTFAEVADEFMDYIRGAELIINAAFIIGMDYEFSLKRDIPKtntfckvTSLAVARKMFPGRNSLDALCARYEIDNSKR-----tHgalldaquilaevy</p> <p><b>SARST:</b> aliSize=155 (resi) RMSD=7.89 (Å)<br/> t--FVVLDFETIGLD-----LDPO-VDEIIEIGAVKIQQGOIV-DEYITLIKPSREISRKSSSETITGTOEMENKRSTEEVLPFLGFLEDSIIIVANNANFYRFLRLWIKKV-MGLDWER---RYPYITLALAKSLLKLRYSYSLDSVVEKLGgPFRHHRaldarvtaqvflrfvemmm<br/> -rQIIVLITETGMNqigahyEGHKLEIGAVEVNRRLTgNNFVYLLKPDRLVDPEAFGVHGIADEFLLDKPTFAEVADEFMDYIRGAELIINAAFIIGMDYEFSLKRDIPKtntfckvTSLAVARKMFPGRNSLDALCARYEIDNSKRtHgalldaquilaevy</p> <p><b>BLAST:</b> aliSize=91 (resi) iden=30.49% (50/164) simi=55.49% (91/164)<br/> tf--VVLDFETIGLD-----OVDEIIEIGAVKIQQGOIV-DEYITLIKPSREISRKSSSETITGTOEMENKRSTEEVLPFLGFLEDSIIIVANNANFYRFLRLWIKKV-MGLDWER---RYPYITLALAKSLLKLRYSYSLDSVVEKLGgPFRHHRaldarvtaqvflrfvemmm<br/> --rqIIVLITETGMNqigahyEGHKLEIGAVEVNRRLTgNNFVYLLKPDRLVDPEAFGVHGIADEFLLDKPTFAEVADEFMDYIRGAELIINAAFIIGMDYEFSLKRDIPKtntfckvTSLAVARKMFPGRNSLDALCARYEIDNSKRtHgalldaquilaevy</p> <p><b>Proposed:</b> aliSize=156 (resi) RMSD=1.49 (Å)<br/> TFVVLDFETIGLD-----DPOVDEIIEIGAVKIQQGOIV-DEYITLIKPSREISRKSSSETITGTOEMENKRSTEEVLPFLGFLEDSIIIVANNANFYRFLRLWIKKV-MGLDWER---RYPYITLALAKSLLKLRYSYSLDSVVEKLGgPFRHHRaldarvtaqvflrfvemmm<br/> ROIIVLITETGMNqigahyEGHKLEIGAVEVNRRLTgNNFVYLLKPDRLVDPEAFGVHGIADEFLLDKPTFAEVADEFMDYIRGAELIINAAFIIGMDYEFSLKRDIPKtntfckvTSLAVARKMFPGRNSLDALCARYEIDNSKRtHgalldaquilaevy</p> |

|     |                                       |   |                                                                                                                                                                                                                                                                                                                                                                                                                                                                                                                                                                                                                                                                                                                                                                                                                                                                                                                                                                                                                                                                                                                                                                                                                                                                                                                                                                                                                                                                                                                                                                                                                                                                                                                                                                                                                                                                                                                                                                                                                                                                                                                                                                                                            |
|-----|---------------------------------------|---|------------------------------------------------------------------------------------------------------------------------------------------------------------------------------------------------------------------------------------------------------------------------------------------------------------------------------------------------------------------------------------------------------------------------------------------------------------------------------------------------------------------------------------------------------------------------------------------------------------------------------------------------------------------------------------------------------------------------------------------------------------------------------------------------------------------------------------------------------------------------------------------------------------------------------------------------------------------------------------------------------------------------------------------------------------------------------------------------------------------------------------------------------------------------------------------------------------------------------------------------------------------------------------------------------------------------------------------------------------------------------------------------------------------------------------------------------------------------------------------------------------------------------------------------------------------------------------------------------------------------------------------------------------------------------------------------------------------------------------------------------------------------------------------------------------------------------------------------------------------------------------------------------------------------------------------------------------------------------------------------------------------------------------------------------------------------------------------------------------------------------------------------------------------------------------------------------------|
| 156 | <p>2p1jA (164)</p> <p>2iocB (220)</p> | C | <p>25.00</p> <p>TM-align: aliSize=144 (resi) RMSD=2.48 (Å)<br/> -----TFVLDLDFETTGLDPOVDLIIIEIGAVKIOGG-----Q-IVDEYHTLTKPSREISRKSSSEITGITOEMLE--NKRSIEEVLPEFLGFLE---D-SIIVAHNANFYRFRRLWTKKVMGLDWE-RPYITDLALAKSLLK--LRSYSIDSVVEKGLGPERHHRalddarvtaq<br/> hghqTLIFDLEATGLPSSRPVITLCLLAVHrralentsisqghppvprpPrVVDKLSLCAFGKACSPGASEITGLSKAELevqGRQRFDDNLAILLRAFLQRpQpCCLVAHNGDrYDFPLQTELARLSTPSpLDgTFCVDSIALKALEQasRKSYSLGSIYTRLYWQAPTDS-----<br/> vflrfvemmm-----<br/> -----htaegdvltllsicqwkpqallqwdeharpfstvkpyg-----</p> <p>SARST: aliSize=156 (resi) RMSD=8.75 (Å)<br/> t-----FVVLDFETTGLDPOVDLIIIEIGAVKIOGG-----QGOIV-----DEYHTLTKPSREISRKSSSEITGITOEMLE--NKRSIEEVLPEFLGFLEDSIIVAH--NANFDYRFRRLWTKKVMGLDW---ERPYITDLALAKSLL--LRSYSIDSVVEKGLGPF--RHHRALDDAR<br/> -hghqTLIFDLEATGLPSSRPVITLCLLAVHrralentsisqGHPPVprprvVVDKLSLCAFGKACSPGASEITGLSKAELevqGRQRFDDNLAILLRAFLQRpQpCCLVAHNGDrYDFPLQTELARLSTPSpLDgTFCVDSIALKALEQasRKSYSLGSIYTRLYWQAPTDSHTAEGDVLTL<br/> VTAOVF-----lrfvemmm<br/> LSICQWkpqallqwdeharpfstvkpyg-----</p> <p>BLAST: aliSize=82 (resi) iden=30.49% (50/164) simi=50.00% (82/164)<br/> -----TFVLDLDFETTGLDPOVDLIIIEIGAVKIOGG-----Q-IVDEYHTLTKPSREISRKSSSEITGITOEMLE--NKRSIEEVLPEFLGFLEDSIIVAH--NANFDYRFRRLWTKKVMGLDW---ERPYITDLALAKSLL--LRSYSIDSVVEKGLGPERHHRALD-----<br/> hghqTLIFDLEATGLPSSRPVITLCLLAVHrralentsisqGHPPVprprpVVDKLSLCAFGKACSPGASEITGLSKAELevqGRQRFDDNLAILLRAFLQRpQpCCLVAHNGDrYDFPLQTELARLSTPSpLDgTFCVDSIALKALEQasRKSYSLGSIYTRLYWQAPTDSHTAEGDVLTL<br/> -----arvtaqvflrfvemmm<br/> lsicqwkpqallqwdeharpfstvkpyg-----</p> <p>Proposed: aliSize=155 (resi) RMSD=2.06 (Å)<br/> -----TFVLDLDFETTGLDPOVDLIIIEIGAVKIOGG-----Q-IVDEYHTLTKPSREISRKSSSEITGITOEMLE--NKRSIEEVLPEFLGFLE---D-SIIVAHNANFYRFRRLWTKKVMGLDWE-RPYITDLALAKSLLK--LRSYSIDSVVEKGLGPF--RHHRALDDAR<br/> hghqTLIFDLEATGLPSSRPVITLCLLAVHrralentsisqghppvprpPrVVDKLSLCAFGKACSPGASEITGLSKAELevqGRQRFDDNLAILLRAFLQRpQpCCLVAHNGDrYDFPLQTELARLSTPSpLDgTFCVDSIALKALEQasRKSYSLGSIYTRLYWQAPTDSHTAEGDVLTL<br/> LDDARVTAOVFLRFVEM-----m<br/> EGDVLTLLSICQWKPAAlqwdeharpfstvkpyg-----</p>                                                                                                                                        |
| 157 | <p>2p1jA (164)</p> <p>2d5rA (252)</p> | C | <p>18.90</p> <p>TM-align: aliSize=140 (resi) RMSD=2.69 (Å)<br/> -----TFVLDLDFETTGLDPOVDLIIIEIGAVKIOGG-----Q-IVDEYHTLTKPSREISRKSSSEITGITOEMLE--NKRSIEEVLPEFLGFLE---D-SIIVAHNANFYRFRRLWTKKVMGLDWE-RPYITDLALAKSLLK--LRSYSIDSVVEKGLGPERHHRalddarvtaqvflrfvemmm-----<br/> ricevwacnldemkkrqvirkyNYAMTTFPvvarpigefrsnadyqyqlrcnVDLLKIQQLTFMNeQYEPpgtSTWQFNFNltEDMYaQDSIELLTtsgIQFKKHeEGIEIQYFAELLMtSGVvlcegVKWLSFHSGYDFGYIKILTNSnLpeeldffeILrlfFpVIYVVKY<br/> AKSLLKLSYSIDSVVEKGLGPERHHRalddarvtaqvflrfvemmm-----<br/> MKSCKNLKGGLOEVAQOLELERIGPqhagsdslltgmaffkmremffedhiddakycghlygl</p> <p>SARST: aliSize=136 (resi) RMSD=7.86 (Å)<br/> tfvvdftettgld-----ricevwacnldemkkrqvirkyNYAMTTFPvvarpigefrsnadyqyqlrcnVDLLKIQQLTFMNeQYEPpgtSTWQFNFNltEDMYaQDSIELLTtsgIQFKKHeEGIEIQYFAELLMtSGVvlcegVKWLSFHSGYDFGYIKILTNSnLpeeldffe<br/> -----RPIYDTLALAKSLLKLSYSIDSVVEKGLGPERHHRalddarvtaqvflrfvemmm-----<br/> lrlfFpVIYVVKYMKSCNLSKGGLOEVAQOLELERIGPqhagsdslltgmaffkmremffedhiddakycghlygl-----</p> <p>BLAST: aliSize=27 (resi) iden=12.80% (21/164) simi=16.46% (27/164)<br/> tfvvdftettgldpqvdeieiegavkiqggqivdeyhtlikpsreisrksseitgitqemlenksieevlpeflgfledsiivahnandfyrlrlwikvmlgdwer-----ricevwacnldemkkrqvirkyNYAMTTFPvvarpigefrsnadyqyqlrcnVDLLKIQQLTFMNeQYEPpgtSTWQFNFNltEDMYaQDSIELLTtsgIQFKKHeEGIEIQYFAELLMtSGVvlcegVKWLSFHSGYDFGYIKILTNSnLpeeldffe<br/> -----RPIYDTLALAKSLLKLSYSIDSVVEKGLGPERHHRalddarvtaqvflrfvemmm-----<br/> tstwqfnfknltdmyaqsdielttsgiqfkkheegietqyfaelmtsgvvlcegvkwlshfsgydfgylikiltnsnlpeeldffeilrlfFpVIYVVKYMKSCNLSKGGLOEVAQOLELERIGPqhagsdslltgmaffkmremffedhiddakycghlygl-----m</p> <p>Proposed: aliSize=153 (resi) RMSD=2.14 (Å)<br/> -----TFVLDLDFETTGLDPOVDLIIIEIGAVKIOGG-----Q-IVDEYHTLTKPSREISRKSSSEITGITOEMLE--NKRSIEEVLPEFLGFLE---D-SIIVAHNANFYRFRRLWTKKVMGLDWE-RPYITDLALAKSLLK--LRSYSIDSVVEKGLGPF--RHHRALDDAR<br/> ricevwacnldemkkrqvirkyNYAMTTFPvvarpigefrsnadyqyqlrcnVDLLKIQQLTFMNeQYEPpgtSTWQFNFNltEDMYaQDSIELLTtsgIQFKKHeEGIEIQYFAELLMtSGVvlcegVKWLSFHSGYDFGYIKILTNSnLpeeldffe---lrlfFpVIYVVKY<br/> LAKSLLKLSYSIDSVVEKGLGPERHHRalddarvtaqvflrfvemmm-----<br/> KYMKSCNLSKGGLOEVAQOLELERIGPqhagsdslltgmaffkmremffedhiddakycghlygl-----</p>                              |
| 158 | <p>2p1jA (164)</p> <p>2p51A (255)</p> | C | <p>17.68</p> <p>TM-align: aliSize=138 (resi) RMSD=2.65 (Å)<br/> -----TFVLDLDFETTGLDPOVDLIIIEIGAVKIOGG-----Q-IVDEYHTLTKPSREISRKSSSEITGITOEMLE--NKRSIEEVLPEFLGFLE---D-SIIVAHNANFYRFRRLWTKKVMGLDWE-RPYITDLALAKSLLK--LRSYSIDSVVEKGLGPERHHRalddarvtaqvflrfvemmm-----<br/> sqispirdvwstnlqqemnlmslieryPVSMITFPvvarplgvfksddyhyqtlranVDSLKIQQLGALSDEEGNAPveActWQFNFTFNlqDDMYapesIELLTksgIDFKKHqVGIEPADFAELLIGSGvlqEVTWITFHSGYDFAYLLKAMTQI---plpaeyefykILcIyFpKNY<br/> TLALAKSLLKLSYSIDSVVEKGLGPERHHRalddarvtaqvflrfvemmm-----<br/> IKYIMsvLNN-SKGLQDIADDQIHRIGPqhagsdslltariffairsryfdgsidsrmlnlygl</p> <p>SARST: aliSize=154 (resi) RMSD=11.61 (Å)<br/> tf-----sqispirdvwstnlqqemnlmslieryPVSMITFPvvarplgvfksddyhyqtlranVDSLKIQQLGALSDEEGNAPveActWQFNFTFNlqDDMYapesIELLTksgIDFKKHqVGIEPADFAELLIGSGvlqEVTWITFHSGYDFAYLLKAMTQI---plpaeyefykILcIyFpKNY<br/> YITLALAKSLLKLSYSIDSVVEKGLGPERHHRalddarvtaqvflrfvemmm-----<br/> NYIKYIMsvLNN-SKGLQDIADDQIHRIGPqhagsdslltariffairsryfdgsidsrmlnlygl-----</p> <p>BLAST: aliSize=32 (resi) iden=10.98% (18/164) simi=19.51% (32/164)<br/> tfvvdftettgldpqvdeieiegavkiqggqivdeyhtlikpsreisrksseitgitqemlenksieevlpeflgfledsiivahnandfyrlrlwikvmlgdwer-----sqispirdvwstnlqqemnlmslieryPVSMITFPvvarplgvfksddyhyqtlranVDSLKIQQLGALSDEEGNAPveActWQFNFTFNlqDDMYapesIELLTksgIDFKKHqVGIEPADFAELLIGSGvlqEVTWITFHSGYDFAYLLKAMTQI---plpaeyefykILcIyFpKNY<br/> -----RPIYDTLALAKSLLKLSYSIDSVVEKGLGPERHHRalddarvtaqvflrfvemmm-----<br/> fnftfnlqddmyapesielksgidfkqhqvgeiepadfaelligsgvlqeevtwitfhsgydfayllkamtqiplpaeyefyILCIYFPKNYIKYIMsvLNN-SKGLQDIADDQIHRIGPqhagsdslltariffairsryfdgsidsrmlnlygl-----</p> <p>Proposed: aliSize=152 (resi) RMSD=2.23 (Å)<br/> -----TFVLDLDFETTGLDPOVDLIIIEIGAVKIOGG-----Q-IVDEYHTLTKPSREISRKSSSEITGITOEMLE--NKRSIEEVLPEFLGFLE---D-SIIVAHNANFYRFRRLWTKKVMGLDWE-RPYITDLALAKSLLK--LRSYSIDSVVEKGLGPF--RHHRALDDAR<br/> sqispirdvwstnlqqemnlmslieryPVSMITFPvvarplgvfksddyhyqtlranVDSLKIQQLGALSDEEGNAPveActWQFNFTFNlqDDMYapesIELLTksgIDFKKHqVGIEPADFAELLIGSGvlqEVTWITFHSGYDFAYLLKAMTQI---plpaeyefykILcIyFpKNY<br/> YITLALAKSLLKLSYSIDSVVEKGLGPERHHRalddarvtaqvflrfvemmm-----<br/> NYIKYIMsvLNN-SKGLQDIADDQIHRIGPqhagsdslltariffairsryfdgsidsrmlnlygl-----</p> |

|     |                                               |   |       |                                                                                                                                                                                                                                                                                                                                                                                                                                                                                                                                                                                                                                                                                                                                                                                                                                                                                                                                                                                                                                                                                                                                                                                                                                                                                                                                                                                                                                                                                                                                                                                                                                                                                                                                                                                                                                                                                                                                                                                                   |
|-----|-----------------------------------------------|---|-------|---------------------------------------------------------------------------------------------------------------------------------------------------------------------------------------------------------------------------------------------------------------------------------------------------------------------------------------------------------------------------------------------------------------------------------------------------------------------------------------------------------------------------------------------------------------------------------------------------------------------------------------------------------------------------------------------------------------------------------------------------------------------------------------------------------------------------------------------------------------------------------------------------------------------------------------------------------------------------------------------------------------------------------------------------------------------------------------------------------------------------------------------------------------------------------------------------------------------------------------------------------------------------------------------------------------------------------------------------------------------------------------------------------------------------------------------------------------------------------------------------------------------------------------------------------------------------------------------------------------------------------------------------------------------------------------------------------------------------------------------------------------------------------------------------------------------------------------------------------------------------------------------------------------------------------------------------------------------------------------------------|
| 159 | <p>2pljA<br/>(164)</p> <p>1wljA<br/>(168)</p> | C | 19.51 | <p>TM-align: aliSize=131 (resi) RMSD=2.97 (Å)<br/> TFVLDFFITGLDPOVDEITEIGAVKIOGGQIVDEYHTLTKPSREISRKSSSEITGITQEMLENKRSTEEVLPPELGFEDSIIVAHNAFYRFRLWIKKVMGLDWERPYIDTLALAKSLKRSYSDSVVEKLGPGFRHHRalddarvtaqvflrfvemmm-----mm<br/> EVVAMCMVGLG-phRESGLARCSLVNVHGAVALYDKFIRPEGETDYRTRVSVTPQHMVGATPFAVARLEIQLKGLKLVGDLKHDFQAK--KED-----MSGTYIDTSTDRILWREAKL--VSRVLSERLLHKSIQNS-----llghsvedaratmelyqisqr</p> <p>-----<br/> irarrglprla</p> <p>SARST: aliSize=149 (resi) RMSD=10.94 (Å)<br/> t---FVLDFFITGLDPOVDEITEIGAVKIOGGQIVDEYHTLTKPSREISRKSSSEITGITQEMLENKRSTEEVLPPELGFEDSIIVAHNAFYRFRLWIKKVMGLDWERPYIDTLALAKSLKRSYSDSVVEKLGPGFRHHRalddarvtaqvflrfvemmm-----mm<br/> -eVAMCMVGLG-phRESGLARCSLVNVHGAVALYDKFIRPEGETDYRTRVSVTPQHMVGATPFAVARLEIQLKGLKLVGDLKHDFQAK-----LKEmsgYTYIDTSTDRILWREAKL--LVSRVLSERLLHKSIQNSllghsSVEDARATMELYQISQRIrarrglprla--</p> <p>BLAST: aliSize=71 (resi) iden=21.34% (35/164) simi=43.29% (71/164)<br/> tf---FVLDFFITGLDPOVDEITEIGAVKIOGGQIVDEYHTLTKPSREISRKSSSEITGITQEMLENKRSTEEVLPPELGFEDSIIVAHNAFYRFRLWIKKVMGLDWERPYIDTLALAKSLKRSYSDSVVEKLGPGFRHHRalddarvtaqvflrfvemmm-----mm<br/> --evAMCMVGLG-phRESGLARCSLVNVHGAVALYDKFIRPEGETDYRTRVSVTPQHMVGATPFAVARLEIQLKGLKLVGDLKHDFQAK-----EDMSYTYIDTSTDRILWREAKLVS--VLS--ERLLHKSIQNSLLGHSSVEDARATMELYQISQRIrarrglprla-----</p> <p>Proposed: aliSize=146 (resi) RMSD=2.14 (Å)<br/> TFVLDFFITGLDPOVDEITEIGAVKIOGGQIVDEYHTLTKPSREISRKSSSEITGITQEMLENKRSTEEVLPPELGFEDSIIVAHNAFYRFRLWIKKVMGLDWERPYIDTLALAKSLKRSYSDSVVEKLGPGFRHHRalddarvtaqvflrfvemmm-----mm<br/> EVVAMCMVGLG-phRESGLARCSLVNVHGAVALYDKFIRPEGETDYRTRVSVTPQHMVGATPFAVARLEIQLKGLKLVGDLKHDFQAK--KE-----DmsGYTYIDTSTDRILWREAKL--VSRVLSERLLHKSIQNSllghsSVEDARATMELYQISQRIrarrglprla</p>                                                                                                                                                                                                                                                                                        |
| 160 | <p>2pljA<br/>(164)</p> <p>2gbzA<br/>(179)</p> | C | 15.85 | <p>TM-align: aliSize=132 (resi) RMSD=3.01 (Å)<br/> --TFVLDFFITGLDPOVDEITEIGAVKIOGGQIVDEYHTLTKPSREISRKSSSEITGITQEMLENKRSTEEVLPPELGFEDSIIVAHNAFYRFRLWIKKVMGLDWERPYIDTLALAKSLKRSYSDSVVEKLGPGFRHHRalddarvtaqvflrfvemmm-----mm<br/> ndRLIWDLEMTGLDTRDSITEATIVTDAQINVLAEgPELAIAHSIETLEaMdeWRNQRrsGLW-QRVLDSQVTHAQAEQTVAFIgewiRAGASPMCGNSICQDRFLHROMS--R-ERyFHyRNLVSTIKEL-ARRW-----aPA-VASGFA-KSSA-----htals</p> <p>-----<br/> dvrdsidelrhyrqfmggtlgg</p> <p>SARST: aliSize=150 (resi) RMSD=10.12 (Å)<br/> t---FVLDFFITGLDPOVDEITEIGAVKIOGGQIVDEYHTLTKPSREISRKSSSEITGITQEMLENKRSTEEVLPPELGFEDSIIVAHNAFYRFRLWIKKVMGLDWERPYIDTLALAKSLKRSYSDSVVEKLGPGFRHHRalddarvtaqvflrfvemmm-----mm<br/> -ndrLIIWDLMTGLDTRDSITEATIVTDAQINVLAEgPELAIAHSIETLEaMdeWRNQRrsGLW-QRVLDSQVTHAQAEQTVAFIgewiRAGASPMCGNSICQDRFLHROMS--R-ERyFHyRNLVSTIKEL-ARRW-----RWAPAVASGFAKSSAHTALSVDSDIDELRHYRQfmggtlgg--</p> <p>BLAST: aliSize=38 (resi) iden=16.46% (27/164) simi=23.17% (38/164)<br/> tfv-----LDFEITGLDPOVDEITEIGAVKIOGGQIVDEYHTLTKPSREISRKSSSEITGITQEMLENKRSTEEVLPPELGFEDSIIVAHNAFYRFRLWIKKVMGLDWERPYIDTLALAKSLKRSYSDSVVEKLGPGFRHHRalddarvtaqvflrfvemmm-----mm<br/> ---ndrliwLIDLEMTGLDTRDSITEATIVTDAQINVLAEgPELAIAHSIETLEaMdeWRNQRrsGLW-QRVLDSQVTHAQAEQTVAFIgewiRAGASPMCGNSICQDRFLHROMS--R-ERyFHyRNLVSTIKEL-ARRW-----RWAPAVASGFAKSSAHTALSVDSDIDELRHYRQfmggtlgg--</p> <p>---kvmgldwerpyidtlalaksllklrsysldsvveklglgprhhralddarvtaqvflrfvemmm<br/> lgg-----</p> <p>Proposed: aliSize=136 (resi) RMSD=2.09 (Å)<br/> --TFVLDFFITGLDPOVDEITEIGAVKIOGGQIVDEYHTLTKPSREISRKSSSEITGITQEMLENKRSTEEVLPPELGFEDSIIVAHNAFYRFRLWIKKVMGLDWERPYIDTLALAKSLKRSYSDSVVEKLGPGFRHHRalddarvtaqvflrfvemmm-----mm<br/> ndRLIWDLEMTGLDTRDSITEATIVTDAQINVLAEgPELAIAHSIETLEaMdeWRNQRrsGLW-QRVLDSQVTHAQAEQTVAFIgewiRAGASPMCGNSICQDRFLHROMS--R-ERyFHyRNLVSTIKEL-ARRW-----RWAPAVASGFAKSSAHTALSVDSDIDELRHYRQfmggtlgg--</p> <p>TAOVFLRFVEMM-----<br/> SIDELRHYRQfmggtlgg</p>                                                                                  |
| 161 | <p>2jevA<br/>(169)</p> <p>lyreA<br/>(183)</p> | C | 10.65 | <p>TM-align: aliSize=141 (resi) RMSD=3.57 (Å)<br/> a-----KFVIRPATAADCSDIRLTKELAK--YEYEE-QVILTEKDLLEDGfGHPFYHCLVAEVPKehwtpghSIVCFAMYFYTYDPwiGKLLYLEDFFVMSDYRDFIGSEILKNLSOVAM-RCRCSSMHFLVNEWEPISINFYKRRGASDLSSeeWRLFKidkevllkmate-----<br/> -lpitlqrgALRLEPLVEADIPESVLAANREALQYMDGpTRPDWYRQSAEQ-R-EGRALPVAVRLGV-----QLVGTTRFAEFLPA--LPACEIGWTWLDQAQHSGLNRMKYLMLKHAfDNLmVRVQLSTASLRAQGAIDKLGAREGV---LRNHR-----rIaggrlddt</p> <p>-----<br/> fvysidhewpqqkaaleasf</p> <p>SARST: aliSize=146 (resi) RMSD=11.17 (Å)<br/> ak-----FVIRPATAADCSDIRLTKELAKYEMEEQVILTEKDLLEDGfGHPFYHCLVAEVPKehwtpghSIVCFAMYFYTYDPwiGKLLYLEDFFVMSDYRDFIGSEILKNLSOVAM-RCRCSSMHFLVNEWEPISINFYKRRGASDLSSeeWRLFKidkevllkmate-----<br/> --lpitlqrgALRLEPLVEADIPESVLAANREALQYMDGpTRPDWYRQSAEQ-R-EGRALPVAVRLGV-----QLVGTTRFAEFLPA--LPACEIGWTWLDQAQHSGLNRMKYLMLKHAfDNLmVRVQLSTASLRAQGAIDKLGAREGV---LRNHR-----rIaggrlddt</p> <p>YLLKM-----ate<br/> EWPOVkaaleasf---</p> <p>BLAST: aliSize=23 (resi) iden=8.28% (14/169) simi=13.61% (23/169)<br/> akfvirpataadcsdi-----RiKEAKYEMEEQVILTEKDLLEDGfGHPFYHCLVAEVPKehwtpghSIVCFAMYFYTYDPwiGKLLYLEDFFVMSDYRDFIGSEILKNLSOVAM-RCRCSSMHFLVNEWEPISINFYKRRGASDLSSeeWRLFKidkevllkmate-----<br/> -----lpitlqrgALRLEPLVEADIPESVLAANREALQYMDGpTRPDWYRQSAEQ-R-EGRALPVAVRLGV-----QLVGTTRFAEFLPA--LPACEIGWTWLDQAQHSGLNRMKYLMLKHAfDNLmVRVQLSTASLRAQGAIDKLGAREGV---LRNHR-----rIaggrlddt</p> <p>-----vpkehwtpeghsivgfamyfitydpwigkllyledffvmsdyrgfigseilknlsqvamrcrcssmhflvaewnepsinfykrrgasdlssseeWRLFKidkevllkmate<br/> pqvkaaleasf-----</p> <p>Proposed: aliSize=151 (resi) RMSD=2.82 (Å)<br/> ak-----FVIRPATAADCSDIRLTKELAKYEMEEQVILTEKDLLEDGfGHPFYHCLVAEVPKehwtpghSIVCFAMYFYTYDPwiGKLLYLEDFFVMSDYRDFIGSEILKNLSOVAM-RCRCSSMHFLVNEWEPISINFYKRRGASDLSSeeWRLFKidkevllkmate-----<br/> --lpitlqrgALRLEPLVEADIPESVLAANREALQYMDGpTRPDWYRQSAEQ-R-EGRALPVAVRLGV-----QLVGTTRFAEFLPA--LPACEIGWTWLDQAQHSGLNRMKYLMLKHAfDNLmVRVQLSTASLRAQGAIDKLGAREGV---LRNHR-----rIaggrlddt</p> <p>LKIMATE-----<br/> POVKAaleasfc</p> |

|     |             |   |       |                                                                                                                                                                                                                                                                                                                                                                                                                                                                                                                                                                                                                                                                                                                                                                                                                                                                                                                                                                                                                                                                                                                                                                                                                                                                                                                                                                                                                                                                                                                                                                                                                                                                                                                                                                                                                                                                                                                                                                                                                                                                                                                                                                                                                                                                                                                                                                                                                                                                                                                                                                                                                                                                                       |
|-----|-------------|---|-------|---------------------------------------------------------------------------------------------------------------------------------------------------------------------------------------------------------------------------------------------------------------------------------------------------------------------------------------------------------------------------------------------------------------------------------------------------------------------------------------------------------------------------------------------------------------------------------------------------------------------------------------------------------------------------------------------------------------------------------------------------------------------------------------------------------------------------------------------------------------------------------------------------------------------------------------------------------------------------------------------------------------------------------------------------------------------------------------------------------------------------------------------------------------------------------------------------------------------------------------------------------------------------------------------------------------------------------------------------------------------------------------------------------------------------------------------------------------------------------------------------------------------------------------------------------------------------------------------------------------------------------------------------------------------------------------------------------------------------------------------------------------------------------------------------------------------------------------------------------------------------------------------------------------------------------------------------------------------------------------------------------------------------------------------------------------------------------------------------------------------------------------------------------------------------------------------------------------------------------------------------------------------------------------------------------------------------------------------------------------------------------------------------------------------------------------------------------------------------------------------------------------------------------------------------------------------------------------------------------------------------------------------------------------------------------------|
| 162 | 1vguA (214) | M | 14.49 | <p><b>TM-align:</b> aliSize=198 (resi) RMSD=2.80 (Å)<br/> LDVCAVVP-A-----C-NOY-SIGNOTILEHSVHALAHPRVKRVVVAISPGDSRFAQLpLANHPQITVVDG-GDE-R-ASVLAGLKAAGDQOWVLVHDAARPC-CLHODDLARLALSETSRG---RTGGI-AAPV-RDT-MKRAEpgknaia-----HTVD--R--NGLWHALTPOFFPRELHDC<br/> SKAVIITaRygssrLgPPLDVGKPMIOVYERAVQAGAEVWVATD--DPVEVA-QAafGGKAITMTRNDHESGTRLRLEVMHKVE-ADIYINLQGDPMIRPRVETLQGMRRDpaLPVATLCHAI-SAAeaaEP-----stkvvvntrqdalysfRSPiPYPrnaekARYLKHVGIYAYRQV</p> <p>PRELHDCLTRALnEGA--T---ITDeASA-EYCFHPOLVGRADNIKTRPEDLALAEFYI--TR-<br/> RQVYON-YSQL--PESmpEqaeSLE-QLRMNAGINIRTFVAATGPGDTEACEKVRALMaQE1</p> <p><b>SARST:</b> aliSize=203 (resi) RMSD=7.27 (Å)<br/> 1-DVCAVVP-A-----C-NOY-SIGNOTILEHSVHALAHPRVKRVVVAISPGDSRFAQLpLANHPQITVVDGDERADSVLAGLKAAGDQOWVLVHDAARPC-CLHODDLARLALSETSRG---GILA-PVR-----DTMKRAEPGKN--AIAHTVD-----RNGLWHALTPOFFPRELHDC<br/> -sKAVIITaRygssrLgPPLDVGKPMIOVYERAVQAGAEVWVATD--DPVEVA-QAafGGKAITMTRNDHESGTRLRLEVMHKVE-ADIYINLQGDPMIRPRVETLQGMRRDpaLPVATLCHAI-SAAeaaEP-----stkvvvntRQDALyFSRSPiPYPrnaekARYLKHVGIYAYRQV</p> <p>L-----TRALN-GatitDASA-EYCFHPOLVGRADNIKTRPEDLALAEFYI-----ltr<br/> SqlpesMPEQAIS-----LQLRMNAGINIRTFVAATGPGDTEACEKVRALMaqe1---</p> <p><b>BLAST:</b> aliSize=23 (resi) iden=7.94% (17/214) simi=10.75% (23/214)<br/> ldvcavvpacpkqylsignqtilehsvhallahprvkr-----VVAISPGDSRFAQLpLANHPQITVVDGDERADSVLAGLKAAGDQOWVLVHDAARPC-CLHODDLARLALSETSRG---GILA-PVR-----DTMKRAEPGKN--AIAHTVD-----RNGLWHALTPOFFPRELHDC<br/> -----skavIITaRyPARY-SRRLPGKPLDVGKPMIOHVYERAVQAGAEVWVATD--DPVEVA-QAafGGKAITMTRNDHESGTRLRLEVMHKVE-ADIYINLQGDPMIRPRVETLQGMRRDpaLPVATLCHAI-SAAeaaEP-----stkvvvntRQDALyFSRSPiPYPrnaekARYLKHVGIYAYRQV</p> <p>-----aarpclhqddlarllalsetsrTGGIlaapV-RDTMKraepgknaiahtvdrnglwhaltppqffprellhdcltralnegatideasaleycgfh<br/> -----rkdalyfsRSPiPYPrnaekARYLKHVGIYAYRQVldvqnsqqlpesmpEqaesleqlrlmnaginitrfevaatgpgvdtpaclekvralmaqe1-----<br/> pqlvegradnikvtrpedlalaefyltr</p> <p><b>Proposed:</b> aliSize=201 (resi) RMSD=2.12 (Å)<br/> LDVCAVVP-A-----C-NOY-SIGNOTILEHSVHALAHPRVKRVVVAISPGDSRFAQLpLANHPQITVVDG-GDE-R-ASVLAGLKAAGDQOWVLVHDAARPC-CLHODDLARLALSETSRG---RTGGI-AAPV-RDT-MKRAEpgKNAIAHTVDRng-----LWHALTPOFFPRELHDC<br/> SKAVIITaRygssrLgPPLDVGKPMIOVYERAVQAGAEVWVATD--DPVEVA-QAafGG--KAIMTRNDHESGTRLRLEVMHKVE-ADIYINLQGDPMIRPRVETLQGMRRDpaLPVATLCHAI-SAAeaaEP-----stkvvvntRQDALyFSRSPiPYPrnaekARYLKHVGIYAYRQV</p> <p>PRELHDCLTRALnEGA--T---ITDeASA-EYCFHPOLVGRADNIKTRPEDLALAEFYI--TR-<br/> QVYON-YSQL--PESmpEqaesLE-QLRMNAGINIRTFVAATGPGDTEACEKVRALMaQE1</p>                                                                                                                                                                   |
| 163 | 1vguA (214) | M | 13.55 | <p><b>TM-align:</b> aliSize=198 (resi) RMSD=3.12 (Å)<br/> IDVCAVVP-A-----C-NOY-SIGNOTILEHSVHALAHPRVKRVVVAISPGDSRFAQLpLANHPQITVVDG-GDE-R-ASVLAGLKAAGDQOWVLVHDAARPC-CLHODDLARLALSETSRG---RTGGI-AAPV-RDT-MKRAEpgknaia-----HTVD--R--NGLWHALTPOFFPRELHDC<br/> -VKTVVVAaLgGtrflpatktvPELPPVVDTPGTLIAAEAAELG-ATLALITAPNKAGVLAH-FERsselectlmergktdqveirraAdlIKAVPTQDKPLGLGHAAGLAESVLDdEDVAVMLPDDLVPPTGVMERMAQVRAEFGGSVLCAVEVSEADV-----Rygifieadtkd</p> <p>-----AHTVDRnGLWHALTPOFFPRELHDCLTRALnEGAT---ITDEASALEYC-G--FHPOLVEGRADNIKVTRPEDLALAEFYI--TR-----<br/> sdvkkvkgmvekpAIEDAP-SRLAATGRYLLD-RKIFALRRIT---TPGaggeLQ-LTDAIDLLiDegHPVHI-THQGRHDLGNFGGYIP-CVDFglshpvygaqlkdaikqilaheea</p> <p><b>SARST:</b> aliSize=191 (resi) RMSD=9.64 (Å)<br/> ldvcavvpac-----C-NOY-SIGNOTILEHSVHALAHPRVKRVVVAISPGD-----SRFAQLPLANHPQ-----ITVVDG--GDERADSVLAGLKAAGDQOWVLVHDAARPC-LHODDLARLALSETSRG---RTGGI-AAPV-RDTMKRAEpgKNAIAHTVDRng-----LWHALTPOFFPRELHDC<br/> -----vktvvpaaagLgtrflpatktvPELPPVVDTPGTLIAAEAAELG-ATLALITAPNKAGVLAH-FERsselectlmergktdqveirraAdlIKAVPTQDKPLGLGHAAGLAESVLDdEDVAVMLPDDLVPPTGVMERMAQVRAEFGGSVLCAVEVSEADV-----Rygifieadtkd</p> <p>NIAHTVDRnGLWHALTPOFFPRELHDCLTRALnEGAT---ITDEASALEYC-G--FHPOLVEGRADNIKVTRPEDLALAEFYI--TR-----ltr<br/> KDSVKKVkgmvekpAIEDAP-SRLAATGRYLLD-RKIFALRRIT---TPGaggeLQ-LTDAIDLLiDegHPVHI-THQGRHDLGNFGGYIP-CVDFglshpvygaqlkdaikqilaheea---</p> <p><b>BLAST:</b> aliSize=51 (resi) iden=15.42% (33/214) simi=23.83% (51/214)<br/> ldvcavvpacpkqylsignqtilehsvhallahprvkr-----VVAISPGDSRFAQLpLANHPQITVVDG-GDE-R-ASVLAGLKAAGDQOWVLVHDAARPC-CLHODDLARLALSETSRG---RTGGI-AAPV-RDTMKRAEpgKNAIAHTVDRng-----LWHALTPOFFPRELHDC<br/> -----vktvvpaaagLgtrflpatktvPELPPVVDTPGTLIAAEAAELG-ATLALITAPNKAGVLAH-FERsselectlmergktdqveirraAdlIKAVPTQDKPLGLGHAAGLAESVLDdEDVAVMLPDDLVPPTGVMERMAQVRAEFGGSVLCAVEVSEADV-----Rygifieadtkd</p> <p>-----tpqffprellhdcltralnegatideasaleycgfhpaqlve<br/> -----gradnikvtrpedlalaefyltr</p> <p><b>Proposed:</b> aliSize=205 (resi) RMSD=2.29 (Å)<br/> IDVCAVVP-A-----C-NOY-SIGNOTILEHSVHALAHPRVKRVVVAISPGDSRFAQLpLANHPQITVVDG-GDE-R-ASVLAGLKAAGDQOWVLVHDAARPC-CLHODDLARLALSETSRG---RTGGI-AAPV-RDTMKRAEpgKNAIAHTVDRng-----LWHALTPOFFPRELHDC<br/> -VKTVVVAaLgGtrflpatktvPELPPVVDTPGTLIAAEAAELG-ATLALITAPNKAGVLAH-FERsselectlmergktdqveirraAdlIKAVPTQDKPLGLGHAAGLAESVLDdEDVAVMLPDDLVPPTGVMERMAQVRAEFGGSVLCAVEVSEADV-----Rygifieadtkd</p> <p>TVDRNGLWHALTPOFFPRELHDCLTRALnEGAT---ITDEASALEYC-G--FHPOLVEGRADNIKVTRPEDLALAEFYI--TR-----ltr<br/> MVEKPAIEDAP-SRLAATGRYLLD-RKIFALRRIT---TPGaggeLQ-LTDAIDLLiDegHPVHI-THQGRHDLGNFGGYIP-CVDFglshpvygaqlkdaikqilaheea---</p>                                                                   |
| 164 | 1vguA (214) | M | 19.16 | <p><b>TM-align:</b> aliSize=199 (resi) RMSD=3.45 (Å)<br/> LDVCAVVP-A-----C-NOY-SIGNOTILEHSVHALAHPRVKRVVVAISPGDSRFAQLpLANHPQITVVDG-GDE-R-ASVLAGLKAAGDQOWVLVHDAARPC-CLHODDLARLALSETSRG---RTGGI-AAPV-RDTMKRAEpgknaia-----HTVD--R--NGLWHALTPOFFPRELHDC<br/> MKTYALMaGgRgerlwpIsredrpPPLFEGKTLLEATLERLAPLVPPEKTLAVRRDQEAAR-P-YA-DG-RLLLEpLGRdtAGAVLLVAEIkEGERLVLPA-DH-YVgdeeaYREALATMLAAEegFVVALGLRPTRPET-----eygyirlgprgawyrgegfvekPSYAEALEYIR</p> <p>NGLWHALTPOFFPRELHDCLTRALnEGAT---ITDEASALEYC-G--FHPOLVEGRADNIKVTRPEDLALAEFYI--TR-----<br/> KGYVWNGGVFAAPATMAELFRHPSHhealerllagasleevyaglpkISIDYGMKAER-VRVLRFPWDDGNWRALERV-ES---qdphenvlgegrhvaldtfgcvvyadrgvvatlgvsglvvakvgdevlvvpkdwarevrvvkrlea</p> <p><b>SARST:</b> aliSize=185 (resi) RMSD=9.24 (Å)<br/> ldvcavvpacpkqyls-----C-NOY-SIGNOTILEHSVHALAHPRVKRVVVAISPGDSRFAQLpLANHPQITVVDGDERADSVLAGLKAAGDQOWVLVHDAARPC-LHODDLARLALSETSRG---RTGGI-AAPV-RDTMKRAEpgKNAIAHTVDRng-----LWHALTPOFFPRELHDC<br/> -----mktyalvmaggrgerlwpIsredrpPPLFEGKTLLEATLERLAPLVPPEKTLAVRRDQEAAR-P-YA-DG-RLLLEpLGRdtAGAVLLVAEIkEGERLVLPA-DH-YVgdeeaYREALATMLAAEegFVVALGLRPTRPET-----eygyirlgprgawyrgegfvekPSYAEALEYIR</p> <p>-----RNGLWHALTPOFFPRELHDCLTRALnEGAT---ITDEASALEYC-G--FHPOLVEGRADNIKVTRPEDLALAEFYI--TR-----<br/> kpsyaaleYIRKGYVWNGGVFAAPATMAELFRHPSHhealerllagasleevyaglpkISIDYGMKAER-VRVLRFPWDDGNWRALERV-ES---qdphenvlgegrhvaldtfgcvvyadrgvvatlgvsglvvakvgdevlvvpkdwarevrvvkrlea</p> <p><b>BLAST:</b> aliSize=64 (resi) iden=16.36% (35/214) simi=29.91% (64/214)<br/> ldvcavvpac-----C-NOY-SIGNOTILEHSVHALAHPRVKRVVVAISPGDSRFAQLpLANHPQITVVDGDERADSVLAGLKAAGDQOWVLVHDAARPC-CLHODDLARLALSETSRG---RTGGI-AAPV-RDTMKRAEpgKNAIAHTVDRng-----LWHALTPOFFPRELHDC<br/> -----mktyalvmaggrgerlwpIsredrpPPLFEGKTLLEATLERLAPLVPPEKTLAVRRDQEAAR-P-YA-DG-RLLLEpLGRdtAGAVLLVAEIkEGERLVLPA-DH-YVgdeeaYREALATMLAAEegFVVALGLRPTRPET-----eygyirlgprgawyrgegfvekPSYAEALEYIR</p> <p>-----altqffprellhdcltralnegatideasaleycgfhpaqlvegradnikvtrpedlalaefyltr</p> <p><b>Proposed:</b> aliSize=197 (resi) RMSD=2.45 (Å)<br/> LDVCAVVP-A-----C-NOY-SIGNOTILEHSVHALAHPRVKRVVVAISPGDSRFAQLpLANHPQITVVDG-GDE-R-ASVLAGLKAAGDQOWVLVHDAARPC-CLHODDLARLALSETSRG---RTGGI-AAPV-RDTMKRAEpgKNAIAHTVDRng-----LWHALTPOFFPRELHDC<br/> MKTYALMaGgRgerlwpIsredrpPPLFEGKTLLEATLERLAPLVPPEKTLAVRRDQEAAR-P-YA-DG-RLLLEpLGRdtAGAVLLVAEIkEGERLVLPA-DH-YVgdeeaYREALATMLAAEegFVVALGLRPTRPET-----eygyirlgprgawyrgegfvekPSYAEALEYIR</p> <p>HALTPOFFPRELHDCLTRALnEGAT---ITDEASALEYC-G--FHPOLVEGRADNIKVTRPEDLALAEFYI--TR-----ltr<br/> WNGGVFAAPATMAELFRHPSHhealerllagasleevyaglpkISIDYGMKAER-VRVLRFPWDDGNWRALERV-ES---qdphenvlgegrhvaldtfgcvvyadrgvvatlgvsglvvakvgdevlvvpkdwarevrvvkrlea---</p> |

|     |                                                     |   |                                                                                                                                                                                                                                                                                                                                                                                                                                                                                                                                                                                                                                                                                                                                                                                                                                                                                                                                                                                                                                                                                                                                                                                                                                                                                                                                                                                                                                                                                                                                                                                                                                                                                                                                                                                                                                                                                                                                                                                                                                                                                                                                                                                                                                                                                                                                                                                                                                                                                                                                                                                                                                                                                                                      |
|-----|-----------------------------------------------------|---|----------------------------------------------------------------------------------------------------------------------------------------------------------------------------------------------------------------------------------------------------------------------------------------------------------------------------------------------------------------------------------------------------------------------------------------------------------------------------------------------------------------------------------------------------------------------------------------------------------------------------------------------------------------------------------------------------------------------------------------------------------------------------------------------------------------------------------------------------------------------------------------------------------------------------------------------------------------------------------------------------------------------------------------------------------------------------------------------------------------------------------------------------------------------------------------------------------------------------------------------------------------------------------------------------------------------------------------------------------------------------------------------------------------------------------------------------------------------------------------------------------------------------------------------------------------------------------------------------------------------------------------------------------------------------------------------------------------------------------------------------------------------------------------------------------------------------------------------------------------------------------------------------------------------------------------------------------------------------------------------------------------------------------------------------------------------------------------------------------------------------------------------------------------------------------------------------------------------------------------------------------------------------------------------------------------------------------------------------------------------------------------------------------------------------------------------------------------------------------------------------------------------------------------------------------------------------------------------------------------------------------------------------------------------------------------------------------------------|
| 165 | <p><b>1vguA (214)</b></p> <p><b>1h5rA (290)</b></p> | M | <p>11.21</p> <p><b>TM-align: aliSize=194 (resi) RMSD=3.11 (Å)</b><br/> LDVCAVVP-A--C-----P-----PKYISIGNOTILEHSVHALAHPrVkrRVVAISFG-SRFAQlpANHP---OITVVDGGD-E-RADSVLAKKAAaDaQWVLVHDAARPClHODDLARLLALSETsRTGGILAAPVrdTMkraepknaiah-----TVDRnLWHAL<br/> KMRKGIILaGsgTrlypvtmavSGLLPYDKPMIYYPLSTMLA-GIRDILISTQOTPRFQQLGDGSqwglnLQYKQVQSPdGLAQAFIIEEFITG-DDCALVLGDNIFYGHDLPKLMEAVNKESGATVFAHYVNDPE-----rygvvefdkngtaisleekpLEPKS--NYAVT</p> <p>TPOFPRELLHDCLTRAlnEGAT--ITDEASALEYcGFH-POLVEGR--ADNKVTRPEDlALAEFYLT-R-----<br/> GLYFDN-DVQMAKNL--KPSArgELEITDINRIYEQGrLSVAMMGrYAWLDTGTHQSIEASNFIAIteerqglkvsceei af rkgfidveqvrklavpliknnygylykmtkd</p> <p><b>SARST: aliSize=188 (resi) RMSD=7.27 (Å)</b><br/> ldvcavvpac-----PKYISIGNOTILEHSVHALAHPrVkrRVVAISFG-SRFAQlPLANH---POITV-----VDGDERADSVLAGLKaadaQWVLVHDAARPClHODDLARLLALSETsRTGGILAAPV-----RDTMKRA----EPGKNAIAHTVDRNGLW<br/> -----kmrkgiilagsgstrlypvtmavSGLLPYDKPMIYYPLSTML-AGIRDILISTQOTPRF--QQLLGdgsQWGLNlqykvqspDLAQAFIIEEFITG--GD-DCALVLGDNIFYGHDLPKLMEAVNKESGATVFAHYVNDPE-----KESGATVFAHYVNDPEYGVVEFDkngTAISLEEKPLEPKSNYA</p> <p>HALTpQFPREllhdCLTRAL-----NEATITDEASALEYcGFHPOLVEGRADNIKV--TRPEDlALAEFY-----l tr<br/> VTGL-YFDND--VVQMAKNlKpsARGELEITDINRIYEQGrLSVAMMGrYAWLdtGTHQSIEASNFIAIteerqglkvsceei af rkgfidveqvrklavpliknnygylykmtkd---</p> <p><b>BLAST: aliSize=99 (resi) iden=25.70% (55/214) simi=46.26% (99/214)</b><br/> ldvca-----VVPCKPKYISIGNOTILEHSVHALAHPrVkrRVVAISFG-SRFAQlpANHP---OITVVDGGDERADSVLAKKAAaDaQWVLVHDAARPClHODDLARLLALSETsRTGGILAAPVrdTMKRA--EPGKNAIAHTVDRNGLW----HALTP-QFPRE<br/> -----kmrkgiilagsgstrlypVTMVSGLLPYDKPMIYYPLSTML-AGIRDILISTQOTPRFQQLGDGSqwglnLYKQVQSPGLAQAFIIEEFITGDDCALV--LGDNIIFYGHDLPKLMEAVNKESGATVFAHYVNDPEYGVVFDKNGTISLEEKPLEPKSnyAVIGLYFDND</p> <p>LLHdcLTRAlnEGAT--ITD-----ASALE-----Yc-----EFPOLVEG-----RADNKVTRPEDlALAEFYLT-----tr<br/> VVQ--MAKNKPSArgELEITDINRIYEQGrLSVAMMGrYAWLdtGTHQSIEASNFIAIteerqglkvsceei af rkgfidveqvrklavpliknnygylykmtkd---</p> <p><b>Proposed: aliSize=201 (resi) RMSD=2.37 (Å)</b><br/> 1-DVCAVVP-A-CP-----KOYISIGNOTILEHSVHALAHPrVkrRVVAISFG-SRFAQlpANHP---OITVVDGGD-E-RADSVLAKKAAaDaQWVLVHDAARPClH-qDLARLLALSETsRTGGILAAPV-----RDTMKRAEpGKNAIAHTVDRNG-----LWHALTPQFPRELLH<br/> -kMRKGIILaGsgTrlypvtmavSGLLPYDKPMIYYPLSTMLA-GIRDILISTQOTPRFQQLGDGSqwglnLQYKQVQSPdGLAQAFIIEEFITG-DDCALVLGDNIFYGH-DLPKLMEAVNKESGATVFAHYVNDPEYGVVEFDKNGTATISLEEKPLEPKSnyAVTGLYFDN-DV</p> <p>DCLTRAlnEGAT--TITdEASALEYcGFH---POLVEG---RaDNKvTRPEDlALAEFYLT-R-----<br/> QMAKNL--KPSArgELE-ITDINR--IYLeqgrLSVAMMGrY-AWLDtGTHQSIEASNFIAIteerqglkvsceei af rkgfidveqvrklavpliknnygylykmtkd</p>                                                                                            |
| 166 | <p><b>1vguA (214)</b></p> <p><b>liimA (289)</b></p> | M | <p>11.21</p> <p><b>TM-align: aliSize=194 (resi) RMSD=3.05 (Å)</b><br/> -LDVCAVVP-A--C-----PKYISIGNOTILEHSVHALAHPrVkrRVVAISFG-SRFAQlpANHP---OITVVDGGD-E-RADSVLAKKAAaDaQWVLVHDAARPClHODDLARLLALSETsRTGGILAAPVrdTMkraepknaiah-----HTVDRnLWHAL<br/> mKTRKGIILaGsgTrlypvtmavSGLLPYDKPMIYYPLSTMLAG-IRDILISTQOTPRFQQLGDGSqwglnLQYKQVQSPdGLAQAFIIEEFITG-DDCALVLGDNIFYGHDLPKLMEAVNKESGATVFAHYVNDPE-----rygvvefdkgtavseleekpLQPKS--NYAVT</p> <p>TPOFPRELLHDCLTRAlnEGAT--TITdEASALEYcGFH-POLVEGRA--DNKvTRPEDlALAEFYLT-R-----<br/> GLYFD-NSVVEMAKNL--KPSArgELE-ITDINRIYmeQGrLSVAMMGrYAWLDTGTHQSIEASNFIAIteerqglkvsceei af rknfinaqqvielagplskndygylykmtkd</p> <p><b>SARST: aliSize=164 (resi) RMSD=16.48 (Å)</b><br/> ldvcavvpac-----PKYISIGNOTILEHSVHALAHPrVkrRVVAISFG-SRFAQlPLANHPQ---ITVVDGG---DERADSVLAKKAAaDaQWVLVHDAARPClH-----ODDLARLLALSETsRTGGILAAPV-----RDTMKRAE-----PGKNAIAHT<br/> -----mktkrgiilagsgstrlypvtmavSGLLPYDKPMIYYPLSTML-AGIRDILISTQOTPRF--QQLLGdgsQwglnLQYKQVQSPdGLAQAFIIEEFITGDDCALV--LGDNIIFYGHDLPKLMEAVNKESGATVFAHYVNDPE-----KESGATVFAHYVNDPEYGVVEFDkgtavseleekpLQPKS</p> <p>VDRNGLWHAL-----TPOFP-----RLLHDCLTRAlnEGATITDEASALEYcG-----fhpqlvegradnikvtrpedlalaefyltr<br/> YAVIGLYFYDnsvveMAKNlKpsArgELEITDINRIYmeqgrLSVAMMGrYAWLdtGTHQSIEASNFIAIteerqglkvsceei af rknfinaqqvielagplskndygylykmtkd</p> <p><b>BLAST: aliSize=15 (resi) iden=3.27% (7/214) simi=7.01% (15/214)</b><br/> ldvcavvpacpkqylsignqtilehsvhallahprvkrvvaisspgrsfaqlplanhpqitvvdgderadsvlaglkaagdaqwlvhdaarpcqhddlarllalsetsrtggilaapvrdtmkraepknaiahvdrnglwhaltppqffprellhdcltralnecatideasaleycgfhppql-<br/> -----m</p> <p>ktkrgiilagsgstrlypvtmavsqllpiydkpmiyyplstmlagirdiliiispqdtprfqqlgdgsqwglnlqykvqspdglaqafiiieefighddcalvlgdnifyghdlpklmeavnkessgatvfaHYVNDPEYGVVEFDkgtavseleekpLQPKSnyavtglyfydsvveMAKNlK</p> <p>-----VGRADNKVTRPEDlALAEFYLT-----tr<br/> psargeleitdinriymeqrslsvammgrYAWLdtGTHQSIEASNFIAIteerqglkvsceei af rknfinaqqvielagplskndygylykmtkd---</p> <p><b>Proposed: aliSize=202 (resi) RMSD=2.40 (Å)</b><br/> -LDVCAVVP-A--C-----PKYISIGNOTILEHSVHALAHPrVkrRVVAISFG-SRFAQlpANHP---OITVVDGGD-E-RADSVLAKKAAaDaQWVLVHDAARPClHODDLARLLALSETsRTGGILAAPV-----RDTMKRAEpGKNAIAHTVDRNG-----LWHALTPQFPRELLH<br/> mKTRKGIILaGsgTrlypvtmavSGLLPYDKPMIYYPLSTMLAG-IRDILISTQOTPRFQQLGDGSqwglnLQYKQVQSPdGLAQAFIIEEFITG-DDCALVLGDNIFYGHDLPKLMEAVNKESGATVFAHYVNDPEYGVVEFDKNGTAVSLEEKPLQPKSnyAVTGLYFD-NSV</p> <p>DCLTRAlnEGAT--TITdEASALEYcGFH---POLVEG---RaDNKvTRPEDlALAEFYLT-R-----<br/> EMAKNL--KPSArgELE-ITDINR--IYMeqgrLSVAMMGrY-AWLDtGTHQSIEASNFIAIteerqglkvsceei af rknfinaqqvielagplskndygylykmtkd</p>                                                                                                           |
| 167 | <p><b>1vguA (214)</b></p> <p><b>llvwA (295)</b></p> | M | <p>14.49</p> <p><b>TM-align: aliSize=197 (resi) RMSD=2.99 (Å)</b><br/> -LDVCAVVP-A--C-----PKYISIGNOTILEHSVHALAHPrVkrRVVAISFG-SRFAQlpANHP---OITVVDGGD-E-RADSVLAKKAAaDaQWVLVHDAARPClHODDLARLLALSETsRTGGILAAPVrdTMkraepknaiah-----TVDRNGLWHALTP<br/> gAHMKGIILaGsgstrlypiTravSGLLPYDKPMIYYPLSTMLA-GIRDILISTQOTPRFQQLGDGSqfgvRFSYRQVEePRgIDAFIVKDFIGD-SKVALVLGDNVfyghrFSEIRRAASLEDGAVIFGYVrdPRP-----rgvvefdsegrvisieekPSRPSKNYVVPGL</p> <p>QFPRELLHDCLTRAlnEGAT--ITDEASALEYcGFH-POLVEGR--ADNKVTRPEDlALAEFYLT-R-----<br/> YFDN-OVVEIAR--I--PSDRgeLEITSVNIEYIRMGkLRVELMGrMAWLDtGTHGILESSFIetiqrqgyfiacleeiayngwitredvlemaeklektdygylykmtkdlaegnfhg</p> <p><b>SARST: aliSize=176 (resi) RMSD=10.15 (Å)</b><br/> 1----DVCAVVPACPKOYL-----SIGNOTILEHSVHALAHPrVkrRVVAISFG-SRFAQlPLANHPqitvvdgderADSVLAGLKAADAO-----WVLVHD-----ARPClHODDL-----ARLLALSETsRTGGILAAPV-----RDTMKRA----EPGKNAI<br/> -gahmKGIILAGSGSTRlypiTravskqllpiydkpmiyyplstml-AGIRDILISTQOTPRF-----PRDLPLYRDLGSGqfgvRFSYRqveeprgIDAFIVKDFIGDskvalvlgdnvfyghrfSEIRRAASLEDGAVIFGYVrdPRP-----KESGATVFAHYVNDPEYGVVEFDsegrVISIEE</p> <p>AHTVDRNGLWHALTPQFPRELLHDCltralnEGATIT-----EASALEYcGFHPOLVEGRAD-NIKVTRPEDlALAEFY-----l tr<br/> KPSRPSKNYVVPGL-YFDNQVVEIAR-----RRIEPSrgelitsvneeYLRMKLRVELMGrMAWLDtGTHGILESSFIetiqrqgyfiacleeiayngwitredvlemaeklektdygylykmtkdlaegnfhg---</p> <p><b>BLAST: aliSize=40 (resi) iden=9.35% (20/214) simi=18.69% (40/214)</b><br/> ldvca-----gahmKGIILAGSGSTRlypiTravSGLLPYDKPMIYYPLSTML-AGIRDILISTQOTPRFQQLGDGSqfgvRFSYRqveeprgIDAFIVKDFIGDskvalvlgdnvfyghrfseilraasledgavifgyvrdprpfgvvefdsegrvisieekpsrpsknnyvvpglyfydnqvv<br/> -----gahmKGIILAGSGSTRlypiTravSGLLPYDKPMIYYPLSTML-AGIRDILISTQOTPRFQQLGDGSqfgvRFSYRqveeprgIDAFIVKDFIGDskvalvlgdnvfyghrfseilraasledgavifgyvrdprpfgvvefdsegrvisieekpsrpsknnyvvpglyfydnqvv</p> <p>eiarrpepsdrgeleitvneeYLRMKLRVELMGrMAWLDtGTHGILESSFIetiqrqgyfiacleeiayngwitredvlemaeklektdygylykmtkdlaegnfhg-----hdaarpcqhddlarllalsetsrtggilaapvrdtmkraepknaiahvdrnglwhaltppqffprellhdcltraln</p> <p>ecatideasaleycgfhppqlvegradnikvtrpedlalaefyltr</p> <p><b>Proposed: aliSize=201 (resi) RMSD=2.38 (Å)</b><br/> -LDVCAVVP-A--C-----PKYISIGNOTILEHSVHALAHPrVkrRVVAISFG-SRFAQlpANHP---OITVVDGGD-E-RADSVLAKKAAaDaQWVLVHDAARPClHODDLARLLALSETsRTGGILAAPV-----RDTMKRAEpGKNAIAHTVDRNG-----RNGLWHALTPQFPRELLH<br/> gAHMKGIILaGsgstrlypiTravSGLLPYDKPMIYYPLSTMLAG-IRDILISTQOTPRFQQLGDGSqfgvRFSYRQVEePRgIDAFIVKDFIGD-SKVALVLGDNVfyghrFSEIRRAASLEDGAVIFGYVrdPRP-----SEGRVISIEEekpsrpsknnyvvpGLYFDN-Q</p> <p>LHDCLTRAlnEGAT--TITdEASALEYcGFH---POLVEGR--ADNKVTRPEDlALAEFYLT--TR<br/> VVEIAR--I--PSDRgeLE-ITSVNIEYLRMGkLRVELMGrMAWLDtGTHGILESSFIetiqrqgyfiacleeiayngwitredvlemaeklektdygylykmtkdlaegnfhg</p> |



|     |                                       |   |       |                                                                                                                                                                                                                                                                                                                                                                                                                                                                                                                                                                                                                                                                                                                                                                                                                                                                                                                                                                                                                                                                                                                                                                                                                                                                                                                                                                                                                                                                                                                                                                                                                                                                                                                                                                                                                                                                                                                                                                                                                                                                                                                                                                                                                                                                                                                                                                                                                                                                               |
|-----|---------------------------------------|---|-------|-------------------------------------------------------------------------------------------------------------------------------------------------------------------------------------------------------------------------------------------------------------------------------------------------------------------------------------------------------------------------------------------------------------------------------------------------------------------------------------------------------------------------------------------------------------------------------------------------------------------------------------------------------------------------------------------------------------------------------------------------------------------------------------------------------------------------------------------------------------------------------------------------------------------------------------------------------------------------------------------------------------------------------------------------------------------------------------------------------------------------------------------------------------------------------------------------------------------------------------------------------------------------------------------------------------------------------------------------------------------------------------------------------------------------------------------------------------------------------------------------------------------------------------------------------------------------------------------------------------------------------------------------------------------------------------------------------------------------------------------------------------------------------------------------------------------------------------------------------------------------------------------------------------------------------------------------------------------------------------------------------------------------------------------------------------------------------------------------------------------------------------------------------------------------------------------------------------------------------------------------------------------------------------------------------------------------------------------------------------------------------------------------------------------------------------------------------------------------------|
| 168 | <p>1vguA (214)</p> <p>1fxoA (292)</p> | M | 11.21 | <p><b>TM-align:</b> aliSize=194 (resi) RMSD=3.13 (Å)</p> <p>1DVCVVP-A--C-----PKQYISIGNOTILEHSHVLAHPRVVRVVAISFGI-SRFAQIPLANHP----OITVVDGGD-E-RADSVIADLKAADaOWVLVHDAARPCLDLRLALSETSRGTGILAPV---RDTMKRAEpknaia-----HTVDRnsLWHALT<br/> - KRKGIILaGsgsGtrlhpatlAISKQLPVYDKPMIYYPLSTMLA-GIREILISTQIOTPRFQQL-LGDGSnwgldLQYAVQPSpDGLAQAFIIGESFIIN-DLSALVLDNLYYGHDFHELIGSASQRTGASVFIYHVLDPDPE-----ygvvfdqggkailsleekpLEPKS--NYAVTG</p> <p>POFPPELHCLTRAlnEGAT--ITDEASALEYC-GFH-POLVEGR--ADNIKVTRPEDLALAEFYLT-R-----<br/> LYDYD-QQVVIARDL--KPSPrgeLEITDVRNRAYLERGQLSVEIMGRGYAWLDTGTHDSLLEAGQFIATLenrqglkvacpeeiayrqkwidaaqleklaaplakngygqylkrlltetvy</p> <p><b>SARST:</b> aliSize=165 (resi) RMSD=16.64 (Å)</p> <p>1dvcavvpac-----PKQYISIGNOTILEHSHVLAHPRVVRVVAISFGI-SRFAQIPLANHPQ-----ITVVD---GIDERADSVLAGLKaadaOWVLVHDAARPCLDLRLALsetSRGTGILAPV---RDTMKRAE-----PGKNAIAHTVDR<br/> -----krkgiilagsgsGtrlhpatlAISKQLPVYDKPMIYYPLSTML-AGIREILISTQIOTPRFQQL-LGDGSnwgldLQYAVqpspDGLAQAFIIGESFI--NDLSA--VLGDNLYYGHDFHELIGSASQ---RQTGASVFIYHVLdPERYGVVVEFDqggkailsleEKPLEPKSNYAV</p> <p><b>BLAST:</b> aliSize=98 (resi) iden=26.64% (57/214) simi=45.79% (98/214)</p> <p>1dvcavv-----CPKQYISIGNOTILEHSHVLAHPRVVRVVAISFGISRFAQIPLANHP----OITVVDGGDERADSVIADLKAADaOWVLVhdaARPCLDLRLALSETSRGTGILAPV---RDTMKRAEpknaiahtVDRNGLW---HNLTPPFELI<br/> -----krkgiilagsgsGtrlhpatlAISKQLPVYDKPMIYYPLSTML-AGIREILISTQIOTPRFQQL-LGDGSnwgldLYAVQPSpDGLAQAFIIGESFI--NDLSA--VLGDNLYYGHDFHELIGSASQRTGASVFIYHVLdPERYGVVVEFDQGGKAISS--LEEKPLEPKSNYAVTGLY</p> <p><b>Proposed:</b> aliSize=200 (resi) RMSD=2.32 (Å)</p> <p>1DVCVVP-A--C-----PKQYISIGNOTILEHSHVLAHPRVVRVVAISFGI-SRFAQIPLANHP----OITVVDGGD-E-RADSVIADLKAADaOWVLVHDAARPCLDLRLALSETSRGTGILAPV---RDTMKRAEpknaiahtVDRNGLW---HNLTPPFELI<br/> - KRKGIILaGsgsGtrlhpatlAISKQLPVYDKPMIYYPLSTMLAG-IREILISTQIOTPRFQQL-LGDGSnwgldLQYAVQPSpDGLAQAFIIGESFIIN-DLSALVLDNLYYghDFHELIGSASQRQ---TGASVFIYHVLdpeRYGVVVEFD-QGGKATISLEEKPLEPKSNYAVTGLYDY-QQV</p>                                                                                                                                                                                                                                                                                                                                                                                                                                                                                                            |
| 169 | <p>2c49A (299)</p> <p>1bx4A (342)</p> | M | 20.07 | <p><b>TM-align:</b> aliSize=287 (resi) RMSD=2.82 (Å)</p> <p>g-KMEKTCVCHTAQYIFNVEK-PEPNT-----SIOIP-SARKYYGAAAVAVGKIKLGV---NSELLSVGYFKNSGYEYLKNDINISKLISEE-PAKAWIFTDKNNOITFFLWGAAKHKEKEL--NP---PN-F-NTEIVHIA-TGDP--E-FNCKKKYK-<br/> -vRENILFGMNPLDISAVVdkdfldkYSkpnqdilaedkheifdelvkkfkVEYHAGSTONSIKVAQWMIQqphkAATFFGIGIKFGEILKKAABAHVDAH-YEQNEQPGTCAACITG-DNRSLIANLAAANCKKekhlDlEknWmIveKARVCYIagFFLTvsPeSVLKVHSEN</p> <p><b>SARST:</b> aliSize=263 (resi) RMSD=5.12 (Å)</p> <p>gkmeKTCVCHTAQYIFNVEK-PEPNT-----SARKYYGAAAVAVGKIKLGV---SELLSVGY---YDFknsGYEYLKNDINISKLISEE-PAKAWIFTDKNNOITFFLWGAAKHykelnppNF-----NTEIVHIA-TGD-----<br/> -----vrenilfgmnpldisAVVdkdfldkYSkpnqdilaedkheifdelvkkfkVEYHAGSTONSIKVAQWMIQqphkAATFFGIGIKFGE---ILKKAABAHVDAH-YEQNEQPGTCAACITG-DNRSLIANLAAANCKKekhlDlEknWmIveKARVCYIagFFLTvsP</p> <p><b>BLAST:</b> aliSize=117 (resi) iden=22.74% (68/299) simi=39.13% (117/299)</p> <p>gkmeKTCVCHTAQYIFNVEK-PEPNT-----SARKYYGAAAVAVGKIKLGV---SELLSVGYFKNSGYEYLKNDINISKLISEE-PAKAWIFTDKNNOITFFLWGAAKHKEKEL--NP---PN-F-NTEIVHIA-TGDP--E-FNCKKKYK-<br/> -----vrenilfgmnpldisAVVdkdfldkYSkpnqdilaedkheifdelvkkfkVEYHAGSTONSIKVAQWMIQqphkAATFFGIGIKFGEILKKAABAHVDAH-YEQNEQPGTCAACITG-DNRSLIANLAAANCKKekhlDlEknWmIveKARVCYIagFFLTvsPeSVLKVHSEN</p> <p><b>Proposed:</b> aliSize=278 (resi) RMSD=2.11 (Å)</p> <p>gkmeKTCVCHTAQYIFNVEK-PEPNT-----SARKYYGAAAVAVGKIKLGV---NSELLSVGYFKNSGYEYLKNDINISKLISEE-PAKAWIFTDKNNOITFFLWGAAKHKEKEL--P-----P-NFNTTEIVHIA-TGDP--E-FNCKKKYK-<br/> -----vrenilfgmnpldisAVVdkdfldkYSkpnqdilaedkheifdelvkkfkVEYHAGSTONSIKVAQWMIQqphkAATFFGIGIKFGE--EILKKAABAHVDAH-YEQNEQPGTCAACITG-DNRSLIANLAAANCKKekhlDlEknWmIveKARVCYIagFFLTvsPeSVLKVHSEN</p>                                                                                                                                                                                                                                                                                                                                                                                                                                                                                                                                                                                                                                                                                                                                                                                     |
| 170 | <p>1h1cA (329)</p> <p>2qlrA (425)</p> | N | 12.16 | <p><b>TM-align:</b> aliSize=288 (resi) RMSD=3.23 (Å)</p> <p>1iakraypyetekrdktylalnennpfpf-----mnyarfitaasaarnspirtmtdiLsrpgksmslaggerlppnmfpfktAVITVENGKIQFGEEEMKRALQYSPAGIFELSWLKLQIKLHNPpIhyppsgqgMDLQTSQQGLCKVfEmIInpgDnVLDLDEAASGTLQSLH--PLGNTINVA<br/> K-LR-PE-VN-V--G-----EGDVVFINP-SPHVF--FRFERILK-TGAVALFAEFH---GESY-VDFLKKYENAVIRITKAFSLAAGVYVVASPKFDAYNRVRLP--FNVYVSLFAKVA--D--HR-EIFFRTKIVFRFRKSLR--G--YRIT<br/> SesGIVpdSLrdLsRwKpedaknpqkTPKFLYTPNgSPHNSLTSerKKEIYELARKYDFLIEDEPFLQfnkrFVPTfLSD-VDRVTRADS--I--SSGLIFELTGPKPLERVILHIOVstLHFIFNIMISQLheWgeegfmAHVDRVIDYSNOKDAILAAdkwtIglAEWH</p> <p><b>SARST:</b> aliSize=269 (resi) RMSD=8.87 (Å)</p> <p>1iakraypyetekrdktylalnennpfpf-----mnyarfitaasaarnspirtmtdiLsrpgksmslaggerlppnmfpfktAVITVENGKIQFGEEEMKRALQYSPAGIFELSWLKLQIKLHNPpIhyppsgqgMDLQTSQQGLCKVfEmIInpgDnVLDLDEAASGTLQSLH--PLGNTINVA<br/> -----KDLRIPEVNVG-----EGDVVFINP-SPHVF--FRFERILK-TGAVALFAEFH---GESY-VDFLKKYENAVIRITKAFSLAAGVYVVASPKFDAYNRVRLP--FNVYVSLFAKVA--D--HR-EIFFRTKIVFRFRKSLR--G--YRIT<br/> sIhPLGcNIINVASdesgivpdsIrdiLsRwKpedaknpqkTPKFLYTPNgSPHNSLTSerKKEIYELARKYDFLIEDEPFLQfnkrFVPTfLSD-VDRVTRADS--I--SSGLIFELTGPKPLERVILHIOVstLHFIFNIMISQLheWgeegfmAHVDRVIDYSNOKDAILAAdkwtIglAEWH</p> <p><b>BLAST:</b> aliSize=60 (resi) iden=10.59% (34/329) simi=18.69% (60/329)</p> <p>1iakraypyetekrdktylalnennpfpf-----mnyarfitaasaarnspirtmtdiLsrpgksmslaggerlppnmfpfktAVITVENGKIQFGEEEMKRALQYSPAGIFELSWLKLQIKLHNPpIhyppsgqgMDLQTSQQGLCKVfEmIInpgDnVLDLDEAASGTLQSLH--PLGNTINVA<br/> -----KDLRIPEVNVG-----EGDVVFINP-SPHVF--FRFERILK-TGAVALFAEFH---GESY-VDFLKKYENAVIRITKAFSLAAGVYVVASPKFDAYNRVRLP--FNVYVSLFAKVA--D--HR-EIFFRTKIVFRFRKSLR--G--YRIT<br/> sIhPLGcNIINVASdesgivpdsIrdiLsRwKpedaknpqkTPKFLYTPNgSPHNSLTSerKKEIYELARKYDFLIEDEPFLQfnkrFVPTfLSD-VDRVTRADS--I--SSGLIFELTGPKPLERVILHIOVstLHFIFNIMISQLheWgeegfmAHVDRVIDYSNOKDAILAAdkwtIglAEWH</p> <p><b>Proposed:</b> aliSize=306 (resi) RMSD=2.67 (Å)</p> <p>1IA-KRIVYPE-TRKR--D-----KTYLALNENPP-----edVDEVFIFNSD-----alRIYVDS-PDEIFKTLISYL-DT-DF-LS-----skNNVSGNADHIIYVMIID--R-SVFPPTI-CYRIFAKAVGAKFVPLTK--LRI--PE-VN---<br/> mnyarfiitaasaarnspirtmtdiLsrpgksmslaggerlppnmfpfktAVITVENGKIQFGEEEMKRALQYSPAGIFELSWLKLQIKLHNPpIhyppsgqgMDLQTSQQGLCKVfEmIInpgDnVLDLDEAASGTLQSLH--PLGNTINVASdesgivpdsIrdiLsRwKpedaknpqkTPKFLYTPNgSPHNSLTSerKKEIYELARKYDFLIEDEPFLQfnkrFVPTfLSD-VDRVTRADS--I--SSGLIFELTGPKPLERVILHIOVstLHFIFNIMISQLheWgeegfmAHVDRVIDYSNOKDAILAAdkwtIglAEWHVPAaLWIKVkgT</p> |

|     |                                                     |   |        |                                                                                                                                                                                                                                                                                                                                                                                                                                                                                                                                                                                                                                                                                                                                                                                                                                                                                                                                                                                                                                                                                                                                                                                                                                                                                                                                                                                                                                        |
|-----|-----------------------------------------------------|---|--------|----------------------------------------------------------------------------------------------------------------------------------------------------------------------------------------------------------------------------------------------------------------------------------------------------------------------------------------------------------------------------------------------------------------------------------------------------------------------------------------------------------------------------------------------------------------------------------------------------------------------------------------------------------------------------------------------------------------------------------------------------------------------------------------------------------------------------------------------------------------------------------------------------------------------------------------------------------------------------------------------------------------------------------------------------------------------------------------------------------------------------------------------------------------------------------------------------------------------------------------------------------------------------------------------------------------------------------------------------------------------------------------------------------------------------------------|
| 171 | <p>1a5pA<br/>(124)</p> <hr/> <p>1a2wA<br/>(124)</p> | N | 98.39  | <p>TM-align: aliSize=105 (resi) RMSD=0.95 (Å)<br/> ketaaakferqhmdsstsa-----ASSSNYCNQMMKSRNLTKDRKPVNTFVHESLADVOAVCSQKNVACKNGOTNCYQSYSTMSITDCRETGSSKYPNAAKYTTQANKHIIVACEGNPYVPVHFDASV<br/> -----ketaaakferqhmdsstsaASSSNYCNQMMKSRNLTKDRKPVNTFVHESLADVOAVCSQKNVACKNGOTNCYQSYSTMSITDCRETGSSKYPNCAKYTTQANKHIIVACEGNPYVPVHFDASV</p> <p>SARST: aliSize=121 (resi) RMSD=14.30 (Å)<br/> k-ETAAAKFERQHMDSSSTSAASS-SNYCNQMMKSRNLTKDRKPVNTFVHESLADVOAVCSQKNVACKNGOTNCYQSYSTMSITDCRETGSSKYPNAAKYTTQANKHIIVACEGNPYVPVHFDAS-v-<br/> -kETAAAKFERQHMDSSST-SAASSSNYCNQMMKSRNLTKDRKPVNTFVHESLADVOAVCSQKNVACKNGOTNCYQSYSTMSITDCRETGSSKYPNCAKYTTQANKHIIVACEGNPYVPVHFDAS-v-</p> <p>BLAST: aliSize=122 (resi) iden=98.39% (122/124) simi=98.39% (122/124)<br/> KETAAAKFERQHMDSSSTSAASSSNYCNQMMKSRNLTKDRKPVNTFVHESLADVOAVCSQKNVACKNGOTNCYQSYSTMSITDCRETGSSKYPNAAKYTTQANKHIIVACEGNPYVPVHFDASV<br/> KETAAAKFERQHMDSSSTSAASSSNYCNQMMKSRNLTKDRKPVNTFVHESLADVOAVCSQKNVACKNGOTNCYQSYSTMSITDCRETGSSKYPNCAKYTTQANKHIIVACEGNPYVPVHFDASV</p> <p>Proposed: aliSize=124 (resi) RMSD=0.68 (Å)<br/> KETAAAKFERQHMDSSSTSAASSSNYCNQMMKSRNLTKDRKPVNTFVHESLADVOAVCSQKNVACKNGOTNCYQSYSTMSITDCRETGSSKYPNAAKYTTQANKHIIVACEGNPYVPVHFDASV<br/> KETAAAKFERQHMDSSSTSAASSSNYCNQMMKSRNLTKDRKPVNTFVHESLADVOAVCSQKNVACKNGOTNCYQSYSTMSITDCRETGSSKYPNCAKYTTQANKHIIVACEGNPYVPVHFDASV</p>                                                                                                       |
| 172 | <p>InloC<br/>(56)</p> <hr/> <p>laojA<br/>(60)</p>   | C | 25.00  | <p>TM-align: aliSize=34 (resi) RMSD=2.23 (Å)<br/> --TFVALYDYESRTEIDLSPFKGERIQIVN--NTEGDwwlahslttgqtg-----Yipsnyvaps-----<br/> kkYAKSKYDFVARNSSSELSVMDDVLELDDR--RQWVKVRN-ASGDSGFVFNILDIMrtp</p> <p>SARST: aliSize=52 (resi) RMSD=11.63 (Å)<br/> t---FVALYDYESRTEIDLSPFKGERIQIVNnteGDWLAHSLTTGQTGYIYPSNYVAP-----s<br/> -kkyAKSKYDFVARNSSSELSVMDDVLELDDR--RQWVKVRN-ASGDSGFVFNILDIMrtp-</p> <p>BLAST: aliSize=29 (resi) iden=25.00% (14/56) simi=51.79% (29/56)<br/> t fval-----YDYESRTEIDLSPFKGERIQIVNTEGDWLAHSLTTGQTGYIYPSNYVAP-----yvaps<br/> -----kkyakskYDFVARNSSSELSVMDDVLELDDR--RQWVKVRN-ASGDSGFVFNILDIMrtp-----</p> <p>Proposed: aliSize=52 (resi) RMSD=1.23 (Å)<br/> --TFVALYDYESRTEIDLSPFKGERIQIVN--nteGDWLAHSLTTGQTGYIYPSNYVAPs----<br/> kkYAKSKYDFVARNSSSELSVMDDVLELDDR--RQWVKVRN-ASGDSGFVFNILDIMrtp</p>                                                                                                                                                                                                                                                                                                                                                                                                                                                                                                                                                                                                                       |
| 173 | <p>leydA<br/>(136)</p> <hr/> <p>lsndA<br/>(129)</p> | C | 100.00 | <p>TM-align: aliSize=111 (resi) RMSD=1.36 (Å)<br/> kLHKEPATL IKAIDGDTVKLMYKGQPMFRLLLVDTPETKHPKKGVEKYGPEASAFTRKMVENAKKIEVEFDKGORTDKYGRGLAYIYADGKMVNEALVROGLAKVAYVykpnntHEQHLRKSEAQAKKEKLN IWS-----<br/> -LHKEPATL IKAIDGDTVKLMYKGQPMFRLLLVDTPETKHPKKGVEKYGPEASAFTRKMVENAKKIEVEFDKGORTDKYGRGLAYIYADGKMVNEALVROGLAKVAYTH-----EQ-----HLRKSEAQAKKEKLN IWS-</p> <p>SARST: aliSize=127 (resi) RMSD=9.61 (Å)<br/> k1-LHKEPATL IKAIDGDTVKLMYKGQPMFRLLLVDTPETKHPKKGVEKYGPEASAFTRKMVENAKKIEVEFDKGORTDKYGRGLAYIYADGKMVNEALVROGLAKVAYVykpnntHEQHLRKSEAQAKKEKLN IWS-s<br/> --LHKEPATL IKAIDGDTVKLMYKGQPMFRLLLVDTPETKHPKKGVEKYGPEASAFTRKMVENAKKIEVEFDKGORTDKYGRGLAYIYADGKMVNEALVROGLAKVAYT-----HEQHLRKSEAQAKKEKLN IWS-</p> <p>BLAST: aliSize=129 (resi) iden=100.00% (129/129) simi=100.00% (129/129)<br/> kLHKEPATL IKAIDGDTVKLMYKGQPMFRLLLVDTPETKHPKKGVEKYGPEASAFTRKMVENAKKIEVEFDKGORTDKYGRGLAYIYADGKMVNEALVROGLAKVAYVykpnntHEQHLRKSEAQAKKEKLN IWS<br/> -LHKEPATL IKAIDGDTVKLMYKGQPMFRLLLVDTPETKHPKKGVEKYGPEASAFTRKMVENAKKIEVEFDKGORTDKYGRGLAYIYADGKMVNEALVROGLAKVAY-----THEQHLRKSEAQAKKEKLN IWS</p> <p>Proposed: aliSize=129 (resi) RMSD=0.51 (Å)<br/> kLHKEPATL IKAIDGDTVKLMYKGQPMFRLLLVDTPETKHPKKGVEKYGPEASAFTRKMVENAKKIEVEFDKGORTDKYGRGLAYIYADGKMVNEALVROGLAKVAYVykpnntHEQHLRKSEAQAKKEKLN IWS<br/> -LHKEPATL IKAIDGDTVKLMYKGQPMFRLLLVDTPETKHPKKGVEKYGPEASAFTRKMVENAKKIEVEFDKGORTDKYGRGLAYIYADGKMVNEALVROGLAKVAY-----THEQHLRKSEAQAKKEKLN IWS</p> |

|     |                                                                   |   |       |                                                                                                                                                                                                                                                                                                                                                                                                                                                                                                                                                                                                                                                                                                                                                                                                                                                                                                                                                                                                                                                                                                                                                                                                                                                                                                                                                                                                                                                                                                                                                                       |
|-----|-------------------------------------------------------------------|---|-------|-----------------------------------------------------------------------------------------------------------------------------------------------------------------------------------------------------------------------------------------------------------------------------------------------------------------------------------------------------------------------------------------------------------------------------------------------------------------------------------------------------------------------------------------------------------------------------------------------------------------------------------------------------------------------------------------------------------------------------------------------------------------------------------------------------------------------------------------------------------------------------------------------------------------------------------------------------------------------------------------------------------------------------------------------------------------------------------------------------------------------------------------------------------------------------------------------------------------------------------------------------------------------------------------------------------------------------------------------------------------------------------------------------------------------------------------------------------------------------------------------------------------------------------------------------------------------|
| 174 | <p><b>1qd0A</b><br/>(128)</p> <hr/> <p><b>1sjvA</b><br/>(102)</p> | C | 70.59 | <p><b>TM-align:</b> aliSize=89 (resi) RMSD=1.65 (Å)<br/> qvqlqeSgGGLVQAGGSLRLSCAASgraasghGHYGMGWFROVPGKEREFVAAIRWSKkETWVKDSVKGRFTISRDNAKITVYLQMNLSKGEDTAVYYCAARPVRvadislpvgfdywgqgtqvtvss-----<br/> -----G-GGLVQAGESLKLSCAA-----SGGFMGWYRQAPGKQRELVAIINSR-IINVAIDFVKGRFTISRDNAKITVYLEMNSLEPEDTAVYYCYTHYFR-----sywgqgtqvtvss</p> <p><b>SARST:</b> aliSize=98 (resi) RMSD=14.81 (Å)<br/> qvqlqesgg--GLVQAGGSLRLSCAASGRAasghghyMGWFROVPGKEREFVAAIRWSKkETWVKDSVKGRFTISRDNAKITVYLQMNLSKGEDTAVYYCAARPVRvadislpvgfdyWGQGTQVTV--ss<br/> -----ggGLVQAGESLKLSCAASGFGF-----MGWYRQAPGKQRELVAIINSR-IINVAIDFVKGRFTISRDNAKITVYLEMNSLEPEDTAVYYCYTHYFR-----YWGQGTQVTVss--</p> <p><b>BLAST:</b> aliSize=82 (resi) iden=75.49% (77/102) simi=80.39% (82/102)<br/> qvqlqesGGGLVQAGGSLRLSCAASgraasghGHygMGWFROVPGKEREFVAAIRWSKkETWVKDSVKGRFTISRDNAKITVYLQMNLSKGEDTAVYYCAARPVRvadislpvgfdyWGQGTQVTVSS<br/> -----GGGLVQAGESLKLSCAASGFGF-----MGWYRQAPGKQRELVAIINSR-IINVAIDFVKGRFTISRDNAKITVYLEMNSLEPEDTAVYYCYTHYFR-----SYWGQGTQVTVSS</p> <p><b>Proposed:</b> aliSize=102 (resi) RMSD=1.49 (Å)<br/> qvqlqeSgGGLVQAGGSLRLSCAASgraasghGHYGMGWFROVPGKEREFVAAIRWSKkETWVKDSVKGRFTISRDNAKITVYLQMNLSKGEDTAVYYCAARPVRvadislpvgfdyWGQGTQVTVSS<br/> -----G-GGLVQAGESLKLSCAA-----SGGFMGWYRQAPGKQRELVAIINSR-IINVAIDFVKGRFTISRDNAKITVYLEMNSLEPEDTAVYYCYTHYF-----RS-YWGQGTQVTVSS</p>                                                                                                                                                                                                                         |
| 175 | <p><b>1pv3A</b><br/>(146)</p> <hr/> <p><b>1k04A</b><br/>(142)</p> | N | 83.80 | <p><b>TM-align:</b> aliSize=109 (resi) RMSD=2.62 (Å)<br/> gspgisgggggirsndkvyenvtglvkaviem-----SSKIQPAPP EYVPMVKEVGLALRLLATVDES L PVL PASTHREIEMAQKLLNSDLAEL INKMKLAQQYVMTSLQOEYKQMLTAAHALAVDAKLLDVIDQARLKMISs rph-<br/> -----eispptanldrndkvyenvtglvkaviemssKIQP-APP EYVPMVKEVGLALRLLATVDETIPLLPASTHREIEMAQKLLNSDLGEL INKMKLAQQYVMTSLQOEYKQMLTAAHALAVDAKLLDVIDQARLKMIGQ-----t</p> <p><b>SARST:</b> aliSize=123 (resi) RMSD=8.28 (Å)<br/> gspgisgggggirsndkv-----YENVTLGVKAVIEMSSKIQPAPP-- EYVPMVKEVGLALRLLATVDES L PVL PASTHREIEMAQKLLNSDLAEL INKMKLAQQYVMTSLQOEYKQMLTAAHALAVDAKLLDVIDQARLKMIS--qs rp<br/> -----eispptanldrndkVYENVTLGVKAVIEMSSKIQPAPP EYVPMVKEVGLALRLLATVDETIPLLPASTHREIEMAQKLLNSDLGEL INKMKLAQQYVMTSLQOEYKQMLTAAHALAVDAKLLDVIDQARLKMIGqt----</p> <p><b>BLAST:</b> aliSize=129 (resi) iden=87.32% (124/142) simi=90.85% (129/142)<br/> gspgisgggggi-----RSNDKVENVTGLVKAVIEMSSKIQPAPP EYVPMVKEVGLALRLLATVDES L PVL PASTHREIEMAQKLLNSDLAEL INKMKLAQQYVMTSLQOEYKQMLTAAHALAVDAKLLDVIDQARLKMISsrp<br/> -----eispptanldrndkVYENVTLGVKAVIEMSSKIQPAPP EYVPMVKEVGLALRLLATVDETIPLLPASTHREIEMAQKLLNSDLGEL INKMKLAQQYVMTSLQOEYKQMLTAAHALAVDAKLLDVIDQARLKMIGQT--</p> <p><b>Proposed:</b> aliSize=130 (resi) RMSD=2.02 (Å)<br/> gspgis-----GggggIRSN--DKVYENVTLGVKAVIEMSSKIQP-aPPEYVPMVKEVGLALRLLATVDES L PVL PASTHREIEMAQKLLNSDLAEL INKMKLAQQYVMTSLQOEYKQMLTAAHALAVDAKLLDVIDQARLKMIS--qs rph<br/> -----eispptA---NLDrsnDKVYENVTLGVKAVIEMSSKIQP-a-PP EYVPMVKEVGLALRLLATVDETIPLLPASTHREIEMAQKLLNSDLGEL INKMKLAQQYVMTSLQOEYKQMLTAAHALAVDAKLLDVIDQARLKMIGqt-----</p> |
| 176 | <p><b>1b6bA</b><br/>(168)</p> <hr/> <p><b>1y9wA</b><br/>(140)</p> | N | 15.71 | <p><b>TM-align:</b> aliSize=101 (resi) RMSD=2.62 (Å)<br/> anefrcItpedaagvfieieafisvsgncplnldvqhfltl-----LCPeLSLWGFVGR-LVAFIIGSLwdeerltqesalhrPrGSAHLHAIAHRSFRQOKESVLRWRYLHHVGAQPAVRRAVMCEDA-LVPFYORFFHPAPCAIVVGS<br/> -----mymkhiengtriegeyiknkvinymsiltdevkqpMEE-VSLVVKNEGKIFGGVTGTM-----Y-FYHLIDFWDESVRHDCYGSQLEHEIEGIAKEKG-CRLLILDSFSFQAPEFYKHKYREYV-VEDHPK</p> <p><b>SARST:</b> aliSize=100 (resi) RMSD=5.57 (Å)<br/> anefrcItpedaagvfieieafisvsgncplnldvqhfltlc-----PELS-----LWGFVGR-LVAFIIGSLWdeerltqesalhrprgHSAHLHAIAHRSFRQOKESVLRWRYLHHVGAQPAVRRAVMCEDA-LVPFYORFFHPAPCAIVVGS<br/> -----mymkhiengtriegeyiknkvinyMSILtdevkqpmeVSLVVKNEGKIFGGVTGTM-----YHLIDFWDESVRHDCYGSQLEHEIEGIAKE-KGCRLLILDSFSFQAPEFYKHKYREYVVEDHPK</p> <p><b>BLAST:</b> aliSize=45 (resi) iden=19.29% (27/140) simi=32.14% (45/140)<br/> anefrcItpedaagvfieieafisvsgncplnldvqhfltlcpeLSLWGFVGR-LVAFIIGSLwdeerltqesalhrprgHSAHLHAIAHRSFRQOKESVLRWRYLHHVGAQPAVRRAVMCEDA-LVPFYORFFHPAPCAIVVGS<br/> -----mymkhiengtriegeyiknkvinyMSILtdevkqpmeVSLVVKNEGKIFGGVTGTM-----YFYHLIDFWDESVRHDCYGSQLEHEIEGIAKEKG-CRLLILDSFSFQAPEFYKHKYREYVvedhpkghsqhffekrl</p> <p><b>Proposed:</b> aliSize=114 (resi) RMSD=2.03 (Å)<br/> --ANEFRCL---T-PEDAAGFEIE-----ieafisvsgncplnldvqhfltlcpeLSLWGFVGR-LVAFIIGSLwdeerltqesalhrprgHSAHLHAIAH-rSFRQOKESVLRWRYLHHVGAQPAVRRAVMCEDA-LVPFYORFFHPAPCA--iVvGS-LTFTEMHCSlrg<br/> myMKHIEngtriEgEYIKNKVIQYNmsiltdevkqpme-----VSLVVKNEGKIFGGVTGTM-----YFYHLIDFWDe-SVRHDCYGSQLEHEIEGIAKEKG-CRLLILDSFSFQAPEFYKHKYREYV-Ved-H-PKghSQHFfEKRL--<br/> haal<br/> -----</p>            |

|     |                                                                   |   |       |                                                                                                                                                                                                                                                                                                                                                                                                                                                                                                                                                                                                                                                                                                                                                                                                                                                                                                                                                                                                                                                                                                                                                                                                                                                                                                                                                                                                                   |
|-----|-------------------------------------------------------------------|---|-------|-------------------------------------------------------------------------------------------------------------------------------------------------------------------------------------------------------------------------------------------------------------------------------------------------------------------------------------------------------------------------------------------------------------------------------------------------------------------------------------------------------------------------------------------------------------------------------------------------------------------------------------------------------------------------------------------------------------------------------------------------------------------------------------------------------------------------------------------------------------------------------------------------------------------------------------------------------------------------------------------------------------------------------------------------------------------------------------------------------------------------------------------------------------------------------------------------------------------------------------------------------------------------------------------------------------------------------------------------------------------------------------------------------------------|
| 177 | <p><b>lbrsA</b><br/>(124)</p> <hr/> <p><b>lawzA</b><br/>(123)</p> | N | 31.71 | <p><b>TM-align:</b> aliSize=97 (resi) RMSD=2.01 (Å)<br/>kesaaakferqhmdsgnsp-----SSSSNYCNLMCCCKMTQgKCKPVNTFVHESLADVAVCS---QKKVTckngqTNCYQSKSTMRIIDRETSSKYPNCAKTTQVEKHIIVACGGkpSVPVHFDA-SV---<br/>-----qdnsrythfl tqhydakpqrDRYCESIMRRGLTIS-PCNDINTFIHGNKRSIKAIcEnknGNPHR-----ENLRI SKSSFOVITIKLHCGSPWPQYRAIAGFRNVVACEN--GLPVHLDQsIFrRp</p> <p><b>SARST:</b> aliSize=88 (resi) RMSD=5.96 (Å)<br/>kes-----AAAKFERQHmdsgnspsssnycnlmccckmtqgkckpvntfvhesladvkavc---SQKkvtckngqTNCYQSKSTMRIIDRETSSKYPNCAKTTQVEKHIIVACGGkpSVPVHF-----dasv<br/>---qdnsrythfl tqhydakpqrdrYCESIMRR-----GLTIS-PCNDINTFIHGNKRSIKAIcEnknGNPH-----RENLRI SKSSFOVITIKLHCGSPWPQYRAIAGFRNVVACEN--GLPVHLDQsifrrp----</p> <p><b>BLAST:</b> aliSize=65 (resi) iden=34.15% (42/123) simi=52.85% (65/123)<br/>kesaaak-----FERQHMDsgnSPSSSN-YCNLMCCCKMTQgKCKPVNTFVHESLADVAVCSQKKvtckng---QTCYQSKSTMRIIDRETSSKYPNCAKTTQVEKHIIVACggKPSVPVHFDA-SV----<br/>-----qdnsrythflTQHYDA--KPOGRDRYCESIMRRGLTIS-PCNDINTFIHGNKRSIKAIcEN-----KknphRENLRI SKSSFOVITIKLHCGSPWPQYRAIAGFRNVVAC--ENGLPVHLDQsIFrRp</p> <p><b>Proposed:</b> aliSize=112 (resi) RMSD=1.55 (Å)<br/>kE--SAAAKFERQHMDsgnSPSSSN-YCNLMCCCKMTQgKCKPVNTFVHESLADVAVCS---QKKVTckngqTNCYQSKSTMRIIDRETSSKYPNCAKTTQVEKHIIVACGGkpSVPVHFDA-S----v<br/>-QdnSRyTHflTQHYDAK--KPOGRDRYCESIMRRGLTIS-PCNDINTFIHGNKRSIKAIcENknGNPHR-----ENLRI SKSSFOVITIKLHCGSPWPQYRAIAGFRNVVACEN--GLPVHLDQsIFrRp-</p>             |
| 178 | <p><b>lbrsA</b><br/>(124)</p> <hr/> <p><b>le21A</b><br/>(119)</p> | N | 71.43 | <p><b>TM-align:</b> aliSize=104 (resi) RMSD=1.33 (Å)<br/>kesaaakferqhmdsgnsp-----SS--SNYCNLMCCCKMTQgKCKPVNTFVHESLADVAVCSQKKVTCKNGQTNCYQSKSTMRIIDCRETGSSKYPNCAKTTQVEKHIIVACGGKPSVPVHFDA-SV-<br/>-----afqrqhmdsdsSPSSSTYCNQMRRRNMTQGRCKPVNTFVHEPLVDVQNVCFQEKVTCKNGGNCYKSNSSMHI TDCRLINGSRYPNCAVRTSPKERHIIVACEGSPYVPVHFDASe</p> <p><b>SARST:</b> aliSize=109 (resi) RMSD=5.16 (Å)<br/>kesaaakfer-----QHMDsgnspSSSNYCNLMCCCKMTQgKCKPVNTFVHESLADVAVCSQKKVTCKNGQTNCYQSKSTMRIIDCRETGSSKYPNCAKTTQVEKHIIVACGGKPSVPVHFDA-S--v<br/>-----afqrqhmdSDSSPS---SSSTYCNQMRRRNMTQGRCKPVNTFVHEPLVDVQNVCFQEKVTCKNGGNCYKSNSSMHI TDCRLINGSRYPNCAVRTSPKERHIIVACEGSPYVPVHFDASe-</p> <p><b>BLAST:</b> aliSize=96 (resi) iden=71.43% (85/119) simi=80.67% (96/119)<br/>kesaaak--FERQHMDsgnSPSSSN-YCNLMCCCKMTQgKCKPVNTFVHESLADVAVCSQKKVTCKNGQTNCYQSKSTMRIIDCRETGSSKYPNCAKTTQVEKHIIVACGGKPSVPVHFDA-SV-<br/>-----afQRQHMDSDSSPSSTYCNQMRRRNMTQGRCKPVNTFVHEPLVDVQNVCFQEKVTCKNGGNCYKSNSSMHI TDCRLINGSRYPNCAVRTSPKERHIIVACEGSPYVPVHFDASe</p> <p><b>Proposed:</b> aliSize=118 (resi) RMSD=1.35 (Å)<br/>kesaaakFERQHMDsgnSPSSSNYCNLMCCCKMTQgKCKPVNTFVHESLADVAVCSQKKVTCKNGQTNCYQSKSTMRIIDCRETGSSKYPNCAKTTQVEKHIIVACGGKPSVPVHFDA-S-<br/>-----AFQRQHMDSDSSPSSTYCNQMRRRNMTQGRCKPVNTFVHEPLVDVQNVCFQEKVTCKNGGNCYKSNSSMHI TDCRLINGSRYPNCAVRTSPKERHIIVACEGSPYVPVHFDASe</p>                                                                                    |
| 179 | <p><b>lbrsA</b><br/>(124)</p> <hr/> <p><b>lgioA</b><br/>(125)</p> | N | 33.06 | <p><b>TM-align:</b> aliSize=96 (resi) RMSD=1.93 (Å)<br/>kesaaakferqhmdsgnsp-----SSSS-NYCNLMCCCKMTQgKCKPVNTFVHESLADVAVCS---QKKVTckngqTNCYQSKSTMRIIDRETSSKYPNCAKTTQVEKHIIVACGGkpSVPVHFDA-S-V---<br/>-----aqddyryihfl tqhydakpGRNdEYCFNMKNRRLTR-PCDRTNFIHGNKNDIKAIcEdrnGOPYR-----GDLRI SKSEFOITIKHKHGGSS-RPpCRGATEDSRVIVVGCEN--GLPVHFDsFiTprh</p> <p><b>SARST:</b> aliSize=85 (resi) RMSD=2.60 (Å)<br/>kesaaakferqhmdsgnspssss-----NYCNLMCCCKMTQ-GkcKPVNTFVHESLADVAVC---CSQKkvtckngqTNCYQSKSTMRIIDRETgSKYPNCA--KTTQVEKHIIVACGGKPSVP-----vhfdasv<br/>-----aqddyryihfl tqhydakpgrndEYCFNMKNRRLTRpC--CDRTNFIHGNKNDIKAIcedrnGOPYR-----GDLRI SKSEFOITIKHKH--GGSSRPpCRGATEDSRVIVVGCENGLPVHFDsfiTprh-----</p> <p><b>BLAST:</b> aliSize=61 (resi) iden=34.68% (43/124) simi=49.19% (61/124)<br/>kesaaak-----FERQHMDsgnSPSSSN-YCNLMCCCKMTQgKCKPVNTFVHESLADVAVCSQKKVTCKNGQTNCYQSKSTMRIIDRETSSKYPNCAKTTQVEKHIIVACggKPSVPVHFDA-S-----v<br/>-----aqddyryihflTQHYDA--KPKGRNdEYCFNMKNRRLTR-PCDRTNFIHGNKNDIKAIcedrnGOPYRGDLRI--SKSEFOITIKHKHGGSSRPpCRGATEDSRVIVVGCEN--ENGLPVHFDsfiTprh-</p> <p><b>Proposed:</b> aliSize=111 (resi) RMSD=1.89 (Å)<br/>k--SAAAKFERQHMDsgnSPSS---sNYCNLMCCCKMTQgKCKPVNTFVHESLADVAVCS---QKKVTckngqTNCYQSKSTMRIIDRETSSKYPNCAKTTQVEKHIIVACGGkpSVPVHFDA-S-V---<br/>-aqdYRYIHflTQHYDAK--PKGRNdEYCFNMKNRRLTR-PCDRTNFIHGNKNDIKAIcEdrnGOPYR-----GDLRI SKSEFOITIKHKHGGSSRPpCRGATEDSRVIVVGCEN--GLPVHFDsFiTprh</p> |

|     |                                                                   |   |       |                                                                                                                                                                                                                                                                                                                                                                                                                                                                                                                                                                                                                                                                                                                                                                                                                                                                                                                                                                                                                                                                                                                                                                                                                                                                                                                                                                |
|-----|-------------------------------------------------------------------|---|-------|----------------------------------------------------------------------------------------------------------------------------------------------------------------------------------------------------------------------------------------------------------------------------------------------------------------------------------------------------------------------------------------------------------------------------------------------------------------------------------------------------------------------------------------------------------------------------------------------------------------------------------------------------------------------------------------------------------------------------------------------------------------------------------------------------------------------------------------------------------------------------------------------------------------------------------------------------------------------------------------------------------------------------------------------------------------------------------------------------------------------------------------------------------------------------------------------------------------------------------------------------------------------------------------------------------------------------------------------------------------|
| 180 | <p><b>1bsrA</b><br/>(124)</p> <hr/> <p><b>1kvzA</b><br/>(107)</p> | N | 24.30 | <p><b>TM-align:</b> aliSize=86 (resi) RMSD=2.69 (Å)<br/> kesaaakferqhmdsgnspss-----SSNYCNLMCCRKMTqgkCPVNTFVHESLADVKAVCSQkkvtckngq--TNCYQSKSTMRTDRETGSSkypnCAKTTQVEKHIIVACGGkpSVPVHFDASV---<br/> -----mqdwaTfkkkhltdtwdvdcDNLMPTSLFD---CKDKNTFIYSLPGPKALCRG-----vifSADVLSNSEFYLAENVKPRK---CKYKLLKSSNRICIRCEH--ELPVHAGVgicp</p> <p><b>SARST:</b> aliSize=99 (resi) RMSD=10.50 (Å)<br/> kesa---AAKFERQHMDSGNSpssSSNYCNLMCCRKMTqgkCPVNTFVHESLADVKAVCSQKKVTCkngqtncYOQSKSTMRTDRETgsskYPNC-AKTTQVEKHIIVACGGkpSVPVHFDAS---v<br/> ---mqdWATfkkkhltdtwdvdcDNLMPTSLFD---CKDKNTFIYSLPGPKALCRGVIFSA-----DVLNSEFYLAENVK---PRKPCYKLLKSSNRICIRCEH--ELPVHAGVgicp-</p> <p><b>BLAST:</b> aliSize=34 (resi) iden=21.50% (23/107) simi=31.78% (34/107)<br/> kesaaakferqhmdsgnspssssnycnlmmccrkmqgk-----CKPVNTFVHESLADVKAVCSQKKVTCCKNGQTncyqSKSTMRTDRETgSSkYPnCAKTTQVEKHIIVACGGKPSVPVHFDASV-----dasv<br/> -----mqdwaTfkkkhltdtwdvdcDNLMPTSLFD---CKDKNTFIYSLPGPKALCRG-----RGMIFSAADVL---SNSEFYLAENV---KPRKP---CKYKLLKSSNRICIRCEH--EHELPHAGVgicp----</p> <p><b>Proposed:</b> aliSize=99 (resi) RMSD=2.06 (Å)<br/> KESAAAKFERQHMDSGNSPSSSSNYCNLMCCRKMTqgkCPVNTFVHESLADVKAVCS-----qkkvtckngqTNCYQSKSTMRTDRETGSSkypnCAKTTQVEKHIIVACGGkpSVPVHFDASV---<br/> MOD-WATfkkkhltdtwdv---D-CNLMPT-SLFD---CKDKNTFIYSLPGPKALCRGvifs-----ADVLSNSEFYLAENVKPRK---PCKYKLLKSSNRICIRCEH--ELPVHAGVgicp</p> |
| 181 | <p><b>1bsrA</b><br/>(124)</p> <hr/> <p><b>1pu3A</b><br/>(105)</p> | N | 23.81 | <p><b>TM-align:</b> aliSize=84 (resi) RMSD=2.21 (Å)<br/> kesaaakferqhmdsgnspss-----SSNYCNLMCCRKMTqgkCPVNTFVHESLADVKAVCSQkkvtckngq--TNCYQSKSTMRTDRETGSSkypnCAKTTQVEKHIIVACGGkpSVPVHFDASV--<br/> -----mqdwlTfqqkhitntrdvdcDNILSTNLFH---CKDKNTFIYSRPEPKAICKG-----iiaSKNVLITSEFYLSDCNVIISRP---CKYKLLKSTNKFCVTIEN-QAPVHVGvGsc</p> <p><b>SARST:</b> aliSize=96 (resi) RMSD=10.50 (Å)<br/> kesa---AAKFERQHMDSGNSpssSSNYCNLMCCRKMTqgkCPVNTFVHESLADVKAVCSQkkvtckngqT--TNCYQSKSTMRTDRETgsskYPNC-AKTTQVEKHIIVACGGkpSVPVHFDAS---v<br/> ---mqdWLTfqqkhitntrdvdcDNILSTNLFH---CKDKNTFIYSRPEPKAICKG-----iiasKNVLITSEFYLSDCNVIISRP---CKYKLLKSTNKFCVTIEN-QAPVHVGvGsc-</p> <p><b>BLAST:</b> aliSize=37 (resi) iden=25.71% (27/105) simi=35.24% (37/105)<br/> kesaaakferqhmdsgnspssssnycnlmmccrkmqgk-----CKPVNTFVHESLADVKAVCSQKKVTCCKNGQTncyqskSTMRTDRETgSSkYPnCAKTTQVEKHIIVACGGKPSVPVHFDASV-----dasv<br/> -----mqdwlTfqqkhitntrdvdcDNILSTNLFH---CKDKNTFIYSRPEPKAICKG-----iiasKNVLITSEFYLSDCNVIISRP---CKYKLLKSTNKFCVTIEN-QAPVHVGvGsc----</p> <p><b>Proposed:</b> aliSize=98 (resi) RMSD=1.79 (Å)<br/> KESAAAKFERQHMDSGNSPSSSSNYCNLMCCRKMTqgkCPVNTFVHESLADVKAVCS-----qkkvtckngqTNCYQSKSTMRTDRETGSSkypnCAKTTQVEKHIIVACGGkpSVPVHFDASV--<br/> -MQDWLTfqqkhitnt-rdv---D-CNILSTNLFH---CKDKNTFIYSRPEPKAICKG-----iiasKNVLITSEFYLSDCNVIISRP---CKYKLLKSTNKFCVTIEN-QAPVHVGvGsc</p>            |
| 182 | <p><b>1bsrA</b><br/>(124)</p> <hr/> <p><b>1mfA</b><br/>(120)</p>  | N | 42.50 | <p><b>TM-align:</b> aliSize=100 (resi) RMSD=1.45 (Å)<br/> kesaaakferqhmdsgnspss-----SSNYCNLMCCRKMTQgkCPVNTFVHESLADVKAVCSQkkvtckngqTNCYQSKSTMRTDRETGSSkYPnCAKTTQVEKHIIVACGGkpSVPVHFDASV<br/> -----mqdgmYqRfLRQHvhpeetgGSDRYCNLMQRRKMTLYHCKRFNTFIHEDIWNIRSICTTNIQCKNGKMNCHG--VVKVTD CRTD GSSRAPNCRIRAIASRRVVIACEGFPQVPVHFDG--</p> <p><b>SARST:</b> aliSize=112 (resi) RMSD=9.33 (Å)<br/> kes---AAKFERQHMD--SGNSPSSSSNYCNLMCCRKMTQgkCPVNTFVHESLADVKAVCSQKKVTCCKNGQTNCYQSKSTMRTDRETGSSkYPnCAKTTQVEKHIIVACGGKPSVPVHFD--asv<br/> ---mqdgmYQRfLRQHvhpeetgGSD--RYCNLMQRRKMTLYHCKRFNTFIHEDIWNIRSICTTNIQCKNGKMNCHG--GVVKVTD CRTD GSSRAPNCRIRAIASRRVVIACEGFPQVPVHFDg---</p> <p><b>BLAST:</b> aliSize=76 (resi) iden=43.33% (52/120) simi=63.33% (76/120)<br/> kesaaa-----KFERQHMDSGNSPSSSSNYCNLMCCRKMTQgkCPVNTFVHESLADVKAVCSQKKVTCCKNGQTNCYQSKSTMRTDRETGSSkYPnCAKTTQVEKHIIVACGGKPSVPVHFD--asv<br/> -----mqdgmYQRfLRQHvhpeet-gGSDRYCNLMQRRKMTLYHCKRFNTFIHEDIWNIRSICTTNIQCKNGKMNCHG--GVVKVTD CRTD GSSRAPNCRIRAIASRRVVIACEGFPQVPVHFDg---</p> <p><b>Proposed:</b> aliSize=115 (resi) RMSD=1.19 (Å)<br/> ke---SAAAKFERQHMDSGNSPSSSSNYCNLMCCRKMTQgkCPVNTFVHESLADVKAVCSQKKVTCCKNGQTNCYQSKSTMRTDRETGSSkYPnCAKTTQVEKHIIVACGGKPSVPVHFDASV<br/> --mqdgmYQRfLRQHvhpeet-gGSDRYCNLMQRRKMTLYHCKRFNTFIHEDIWNIRSICTTNIQCKNGKMNCHG--VVKVTD CRTD GSSRAPNCRIRAIASRRVVIACEGFPQVPVHFDG--</p>    |

|     |                                             |   |       |                                                                                                                                                                                                                                                                                                                                                                                                                                                                                                                                                                                                                                                                                                                                                                                                                                                                                                                                                                                                                                                                                                                                                                                                                                                                                                                                                                                                                                                     |
|-----|---------------------------------------------|---|-------|-----------------------------------------------------------------------------------------------------------------------------------------------------------------------------------------------------------------------------------------------------------------------------------------------------------------------------------------------------------------------------------------------------------------------------------------------------------------------------------------------------------------------------------------------------------------------------------------------------------------------------------------------------------------------------------------------------------------------------------------------------------------------------------------------------------------------------------------------------------------------------------------------------------------------------------------------------------------------------------------------------------------------------------------------------------------------------------------------------------------------------------------------------------------------------------------------------------------------------------------------------------------------------------------------------------------------------------------------------------------------------------------------------------------------------------------------------|
| 183 | <p>1bsrA (124)</p> <hr/> <p>2aasA (124)</p> | N | 81.45 | <p><b>TM-align:</b> aliSize=104 (resi) RMSD=1.40 (Å)<br/> kesaaakferqhmdsgnspss-----SSSNYNLMMCCRKMTOGKCKPVNTFVHESLADVKAVCSOKKVTCKNGOTNCYOSKSTMRIIDCRETGSSSKYPNCAYKTTQVEKHIIVACGGKPSVPVHFDASV<br/> -----ketaakferqhmdsstaaSSSNYNQMKSRLTKDRCKPVNTFVHESLADVQAVCSOKNACKNGOTNCYOSYSTMSITDCRETGSSSKYPNCAYKTTQANKHIIVACEINPYVPVHFDASV</p> <p><b>SARST:</b> aliSize=118 (resi) RMSD=8.87 (Å)<br/> kesa----AAKFERQHMDsgNSPSSS-SNYNLMMCCRKMTOGKCKPVNTFVHESLADVKAVCSOKKVTCKNGOTNCYOSKSTMRIIDCRETGSSSKYPNCAYKTTQVEKHIIVACGGKPSVPVHFDAS-v<br/> ---ketaAAKFERQHMDsSTSAASsSNYNQMKSRLTKDRCKPVNTFVHESLADVQAVCSOKNACKNGOTNCYOSYSTMSITDCRETGSSSKYPNCAYKTTQANKHIIVACEINPYVPVHFDASv-</p> <p><b>BLAST:</b> aliSize=107 (resi) iden=81.45% (101/124) simi=86.29% (107/124)<br/> KESAAAKFERQHMDSGNSPSSSSYNLMMCCRKMTOGKCKPVNTFVHESLADVKAVCSOKKVTCKNGOTNCYOSKSTMRIIDCRETGSSSKYPNCAYKTTQVEKHIIVACGGKPSVPVHFDASV<br/> KETAAAKFERQHMDSSTSAASSSYNQMKSRLTKDRCKPVNTFVHESLADVQAVCSOKNACKNGOTNCYOSYSTMSITDCRETGSSSKYPNCAYKTTQANKHIIVACEINPYVPVHFDASV</p> <p><b>Proposed:</b> aliSize=124 (resi) RMSD=1.40 (Å)<br/> KESAAAKFERQHMDSGNSPSSSSYNLMMCCRKMTOGKCKPVNTFVHESLADVKAVCSOKKVTCKNGOTNCYOSKSTMRIIDCRETGSSSKYPNCAYKTTQVEKHIIVACGGKPSVPVHFDASV<br/> KETAAAKFERQHMDSSTSAASSSYNQMKSRLTKDRCKPVNTFVHESLADVQAVCSOKNACKNGOTNCYOSYSTMSITDCRETGSSSKYPNCAYKTTQANKHIIVACEINPYVPVHFDASV</p>                                                                                                      |
| 184 | <p>1bsrA (124)</p> <hr/> <p>2hkyA (129)</p> | N | 35.48 | <p><b>TM-align:</b> aliSize=97 (resi) RMSD=2.01 (Å)<br/> kesaaakferqhmdsgnspssss-----NYCNLMCCrKMTQ--GKCKPVNTFVHESLADVKAVCSOKKVTCKNG-OTNCYOSKSTMRIIDCRETGSSSKYPNCAYKTTQVEKHIIVACGGK-----PSVPVHFDASV<br/> -----mkpkgmtssqwfkiqhmqpspQACNSAMK--NINKhtKRCKDLNTEFLHEPFSSVAITCQTPKIAC-KNgDKNCHOSHGPVSLTMCKLI-SGKYPNCRYEKRONKSYVVACKPPqkksdqfHLVPVHLDRVL</p> <p><b>SARST:</b> aliSize=115 (resi) RMSD=10.20 (Å)<br/> k-----ESAAAKFERQHMDSGNSpsSSSNYNLMMCCRkmtqgKCKPVNTFVHESLADVKAVCSOKKVTCKNGOTNCYOSKSTMRIIDCRETGSSSKYPNCAYKTTQVEKHIIVACG-----GKPSVPVHFDAS-v<br/> -mkpkgMTSSQWFKIHMQSPQ--ACNSAMKNIINKHTK----RCKDLNTEFLHEPFSSVAITCQTPKIACKNGDKNCHOSHGPVSLTMCK-LTSGKYPNCRYEKRONKSYVVACKppqkksdqfHLVPVHLDRV1-</p> <p><b>BLAST:</b> aliSize=66 (resi) iden=41.94% (52/124) simi=53.23% (66/124)<br/> kesaaak-----FERQHMDsgnSPSSsSNYNLMMCCRKMTOGKCKPVNTFVHESLADVKAVCSOKKVTCKNGOTNCYOSKSTMRIIDCRETGSSSKYPNCAYKTTQVEKHIIVAC---GGKPS-----VPVHFDASV<br/> -----mkpkgmtssqwfkiHMQSP--SPOA----CNSAMKNIINKHTK--RCKDLNTEFLHEPFSSVAITCQTPKIACKNGDKNCHOSHGPVSLTMCKLI-SGKYPNCRYEKRONKSYVVACKppQKkdsqqfhlVPVHLDRV1---</p> <p><b>Proposed:</b> aliSize=113 (resi) RMSD=1.85 (Å)<br/> ---ESAAAKFERQHMDSG-nsPsssnYNLMMCCrKMTQ--GKCKPVNTFVHESLADVKAVCSOKKVTCKNG-OTNCYOSKSTMRIIDCRETGSSSKYPNCAYKTTQVEKHIIVACGGK-----PSVPVHFDASV<br/> mkpkgMTSSQWFKIHMQSP--Q----ACNSAMK--NINKhtKRCKDLNTEFLHEPFSSVAITCQTPKIAC-KNgDKNCHOSHGPVSLTMCKLI-SGKYPNCRYEKRONKSYVVACKPPqkksdqfHLVPVHLDRVL</p> |
| 185 | <p>1bsrA (124)</p> <hr/> <p>2k11A (127)</p> | N | 70.16 | <p><b>TM-align:</b> aliSize=104 (resi) RMSD=1.53 (Å)<br/> kesaaakferqhmdsgnspss-----SSSNYNLMMCCRKMTOGKCKPVNTFVHESLADVKAVCSOKKVTCKNGOTNCYOSKSTMRIIDCRETGSSSKYPNCAYKTTQVEKHIIVACGGKPSVPVHFDASV<br/> -----kesrakkfqrqhmdsdsspsSSSYCNQMRRRNMTGRCCKPVNTFVHEPLVDVQNVCFQEKVTCKNGGNCYKSNSSMHIIDCRLINGSRYPNCAYRTSPKERHIIVACEISPYVPVHFDASVeds</p> <p><b>SARST:</b> aliSize=118 (resi) RMSD=9.80 (Å)<br/> k-ESAAAKFERQHMD--SGNSpSSsSNYNLMMCCRKMTOGKCKPVNTFVHESLADVKAVCSOKKVTCKNGOTNCYOSKSTMRIIDCRETGSSSKYPNCAYKTTQVEKHIIVACGGKPSVPVHFDAS-----sv<br/> -kESRAKFKFQROHMDsdSPSS--SS--TYCNQMRRRNMTGRCCKPVNTFVHEPLVDVQNVCFQEKVTCKNGGNCYKSNSSMHIIDCRLINGSRYPNCAYRTSPKERHIIVACEISPYVPVHFDASveds--</p> <p><b>BLAST:</b> aliSize=101 (resi) iden=72.58% (90/124) simi=81.45% (101/124)<br/> KESAAAKFERQHMDSGNSPSSSSYNLMMCCRKMTOGKCKPVNTFVHESLADVKAVCSOKKVTCKNGOTNCYOSKSTMRIIDCRETGSSSKYPNCAYKTTQVEKHIIVACGGKPSVPVHFDASV<br/> KESRAKFKFQROHMDSDSPSSSSSYCNQMRRRNMTGRCCKPVNTFVHEPLVDVQNVCFQEKVTCKNGGNCYKSNSSMHIIDCRLINGSRYPNCAYRTSPKERHIIVACEISPYVPVHFDASVeds</p> <p><b>Proposed:</b> aliSize=122 (resi) RMSD=1.40 (Å)<br/> KESAAAKFERQHMDS--GNSPssSNYNLMMCCRKMTOGKCKPVNTFVHESLADVKAVCSOKKVTCKNGOTNCYOSKSTMRIIDCRETGSSSKYPNCAYKTTQVEKHIIVACGGKPSVPVHFDASV<br/> KESRAKFKFQROHMDSDsSPSS--SSTYNQMRRRNMTGRCCKPVNTFVHEPLVDVQNVCFQEKVTCKNGGNCYKSNSSMHIIDCRLINGSRYPNCAYRTSPKERHIIVACEISPYVPVHFDASVeds</p>                                                                          |

|     |   |       |                                                                                                                                                                                                                                                                                                                                                                                                                                                                                                                                                                                                                                                                                                                                                                                                                                                                                                                                                                                                                                                                                                                                                                                                                                                                                                                                                                                                                                                                                                                                                                                                                                                                                                                                                                                                                                                                                                                                                                                                                                                                                                                                                                                                                                                                                                                                                                                                 |
|-----|---|-------|-------------------------------------------------------------------------------------------------------------------------------------------------------------------------------------------------------------------------------------------------------------------------------------------------------------------------------------------------------------------------------------------------------------------------------------------------------------------------------------------------------------------------------------------------------------------------------------------------------------------------------------------------------------------------------------------------------------------------------------------------------------------------------------------------------------------------------------------------------------------------------------------------------------------------------------------------------------------------------------------------------------------------------------------------------------------------------------------------------------------------------------------------------------------------------------------------------------------------------------------------------------------------------------------------------------------------------------------------------------------------------------------------------------------------------------------------------------------------------------------------------------------------------------------------------------------------------------------------------------------------------------------------------------------------------------------------------------------------------------------------------------------------------------------------------------------------------------------------------------------------------------------------------------------------------------------------------------------------------------------------------------------------------------------------------------------------------------------------------------------------------------------------------------------------------------------------------------------------------------------------------------------------------------------------------------------------------------------------------------------------------------------------|
| 186 | N | 26.36 | <p><b>TM-align:</b> aliSize=85 (resi) RMSD=2.18 (Å)<br/> kesaaakferqhm<del>dsngspss</del>-----SSNYCNLMCC--RK--MTqgkCKPVNTFVHESLADYKAVCSQkKvtckngq--TNCYQSKSTMRIIDRETgSskypNCAKTTQVEKHIIVACGGkpSVPVHFDASV--<br/> -----drewekfktkhi<del>tsqsvADFNCNRT</del>NDpaYTPdGQ---CKPINTFIHSTTGPVKEICRR--A-----tgrVNKSSIQOFTLITKPN--I---RCKYSQSNTTNFTCITCRD--NYPVHFVKTGkc</p> <p><b>SARST:</b> aliSize=98 (resi) RMSD=10.56 (Å)<br/> kes--AAAKFERQHMDSGNSPSSSSNYCnlmmccrkITQ-----GKCKPVNTFVHESLADYKAVCSQKVTCKngqtncYQSKSTMRIIDRETgSSKYPncAKTTQVEKHIIVACGGkpSVPVHFDASV--sv<br/> ---drEWEKFKTKHI<del>TSQSVADFNCNRT</del>-----MNDpaytpd<del>CKPINTFIHSTTGPVKEICRR</del>ATGRV-----NKSSIQOFTLITKPN--NPIRC--KYSQSNTTNFTCITCRD--NYPVHFVKTgkc--</p> <p><b>BLAST:</b> aliSize=53 (resi) iden=32.73% (36/110) simi=48.18% (53/110)<br/> kesaaa-----KFERQHMDsgNSPSSSSNYCNLMCCRMII--QKCKPVNTFVHESLADYKAVCSQKVTCKngqTNCYQSKSTMRIIDRETgSSKYP--NCAKTTQVEKHIIVACGGKPSVPVHF-----dasv<br/> -----drewekfktkhi<del>tsqsvADFNCNRT</del>NDPAYTPd<del>CKPINTFIHSTTGPVKEICRR</del>ATGRV-----NKSSIQOFTLITKPN--NPIRC--KYSQSNTTNFTCITCRD--RDNYPVHFvktgkc---</p> <p><b>Proposed:</b> aliSize=99 (resi) RMSD=1.61 (Å)<br/> ke-SAAAKFERQHMDSGnSPSSsSNYCNLMCC--RK--MTqgkCKPVNTFVHESLADYKAVCSQ---kkvtckngqtncYQSKSTMRIIDRETgSskypNCAKTTQVEKHIIVACGGkpSVPVHFDASV--<br/> ---dREWEKFKTKHI<del>TSQ-SVAD--FNCNRT</del>NDpaYTPdGQ---CKPINTFIHSTTGPVKEICRRatgr-----VNKSSIQOFTLITKPN--I---RCKYSQSNTTNFTCITCRD--NYPVHFVKTGkc</p>                                                                                                                                                                                                                                                                                                                                                                                                                                                                                                                                                                                                                                                                                                                                                                                                                                                                                                                     |
| 187 | N | 10.50 | <p><b>TM-align:</b> aliSize=96 (resi) RMSD=2.85 (Å)<br/> aqnnpylfrsnkfltlfknqhgslrllqrfnedtekl<del>enl</del>-----RDYRVLEYCSKPNITLLPHSD---SDLLVLEFOAILLVN-----PDGRDITYKIDQ--GDATKIQAGTPFYLINPdNnONLRIKFAITfrprgTVE--<br/> -----mmiviktai<del>pdvli</del>lepkvfgdergffesynqqtfeeligrk<del>vtfv</del>QDNHSSKKNVIRGLIFQRgenAQGKLRCAVLEVFDAAIDirkesptFGQWGVNLSAenKROLWPEFAHGFTVLS-EYAEFLYKATN-----YSSps</p> <p>FFLSStkrLpsylsafsknfleasydsydeieqtlqee-----EGEVIvkmk-----<br/> EGSIL-----wndeaigiewpfsqlpLSAKDA-----aaplldqallte</p> <p><b>SARST:</b> aliSize=107 (resi) RMSD=10.11 (Å)<br/> aqnnpyl-----FRSNKFLTLKNOHSLRLLQRFNedtekl<del>ENLRDY</del>-----RVLEYCSKPNITLLPHSD---SDLLVLEFOAILLVN-----DGRDITYKID--OGDATKIQAGTPFYLINPDNNONLRIK-----<br/> -----mmiviktai<del>pdvli</del>lepkvfgdergffesynqqtfeeligrk<del>vtfv</del>QDNHSSKKNVIRGLIFQRgenAQGKLRCAVLEVFDAAIDirkesptFGQWGVNLSAenKROLWPEFAHGFTVLS-EYAEFLYKATnysspssegsilwndeaigiewpfsqlpelsakdaaaplldqa</p> <p>---faitfrprgtvedfflssstkrLpsylsafsknfleasydsydeieqtlqeeqegvirkmpk<br/> llte-----</p> <p><b>BLAST:</b> aliSize=25 (resi) iden=6.63% (12/181) simi=13.81% (25/181)<br/> aqnnpylfrsnkfltlfknqhgslrllqrfnedtekl<del>enlrdy</del>rvleycskpnitllphsdsdlvlvlegqailvlvnpdgrditykldqgdaikiqagtpfyl-----<br/> -----mmiviktai<del>pdvli</del>lepkvfgdergffesynqqtfeeligrk<del>vtfv</del>qdnhsskknvirglhfrqgenaagklvrcavgevfvd</p> <p>-----INPDNNONLRIKFAITFRPRGTVEDEFLSStkrLPSYLsafsknfleasydsydeieqtlqeeqegvirkmpk<br/> avdirkesptfgqwgvnLSAenKROLWPEFAHGFTVLS-EYAEFLYKATnysspssegsilwndeaigiewpfsqlpelsakdaaaplldqallte-----</p> <p><b>Proposed:</b> aliSize=126 (resi) RMSD=2.39 (Å)<br/> --A-----qnpYLFRSNKFLTLKNOHSLRLLQ--RFNedtekl<del>ENLRDY</del>RVLEYCSKPNITLLPHSD---SDLLVLEFOAILLVN-----PDGRDITYKIDQ--GDATKIQAGTPFYLINPdNnONLRIKFAITfrprgTVE--DFLS-----stkrLpsyls<br/> mmiviktai-----PDVLIlepkvfgdergffesynqqtfeeligrk<del>vtfv</del>QDNHSSKKNVIRGLIFQRgenAQGKLRCAVLEVFDAAIDirkesptFGQWGVNLSAenKROLWPEFAHGFTVLS-EYAEFLYKATN-----YSSpsEGSILwndeaigiewpfsqlpel-----</p> <p>afsknfleasydsydeieqtlqeeqEGEVIv-----kmpk<br/> -----SAKDAaaplldqallte-----</p>                                                                                                                                                                                                                                                                          |
| 188 | C | 6.63  | <p><b>TM-align:</b> aliSize=123 (resi) RMSD=3.06 (Å)<br/> aqn-NpYLFRS-----NKFLTLFKN-----OHGSLRLLORfNedtekl<del>enl</del>---RDRVLEYCSKPNITLLPHSD---SDLLVLEFOAILLVN-PDGRDITYKIDQ--DATKIQAGTPFYLINPdNnONLRIKFAITfrprgTVEDEFLSStkrLpsyls<br/> ---yKEP-GVKldfetgiiENAKKSVRRlsdmkgyfideeawkmveegdpVYEVYAIQEE-EE-----ekeGLNFATTVLYGKvgnEFFmtkgYHskidRAEVYFAKKGKGMLOTPEGEARFIEMEP--TIYVPPYWAHRTNT-GDKPFIFALY-P---ADAGHDYGTI-----A-E</p> <p><del>safsknfleasydsydeieqtlqeeqegvirkmpk-----MPK-----</del><br/> <del>-----KG-----fskiVVEEngkvvkdnpk</del></p> <p><b>SARST:</b> aliSize=100 (resi) RMSD=9.18 (Å)<br/> aqnnpylfrsnkfltlfknqhgslrllqrfnedtekl<del>enlrdy</del>rvleycskpnitllphsdsdlvlvlegqailvlvnpdgrditykldqgdaikiqagtpfyl-----YRVLEYCSKPNITLLPHSD---SDLLVLEFOAILLVN-PDGRDITYKIDQ--DATKIQAGTPFYLINPdNnONLRIKFAITfrprgTVEDEFLSStkrLpsyls<br/> -----ykepfgvkldfetgiiENAKKSVRRlsdmkgyfideeawkmveegdpvvyevyaeqeekeGLNFATTVLYGKvgnEFFmtkgYHskidRAEVYFAKKGKGMLOTPEGEARFIEMEP--TIYVPPYWAHRTNT-GDKPFIFALY-P---ADAGHDYGTI-----A-E</p> <p>KFAITF-----RRPGTVEDEFLSStkrLPSYLsafsknfleasydsydeieqtlqeeqegvirkmpk<br/> ALYPADaghd<del>vgtiaekGFSKIVVEENG</del>KVV-VKDNPK-----</p> <p><b>BLAST:</b> aliSize=27 (resi) iden=9.39% (17/181) simi=14.92% (27/181)<br/> aqnnpylfrsnkfltlfknqhgslrllqrfnedtekl<del>enlrdy</del>rvleycskpnitllphsdsdlvlvlegqailvlvnpdgrditykldqgdaikiqagtpfyl-----YRVLEYCSKPNITLLPHSD---SDLLVLEFOAILLVN-PDGRDITYKIDQ--DATKIQAGTPFYLINPdNnONLRIKFAITfrprgTVEDEFLSStkrLpsyls<br/> -----ykepfgvkldfetgiiENAKKSVRRlsdmkgyfideeawkmveegdpvvyevyaeqeekeGLNFATTVLYGKvgnEFFmtkgYHskidRAEVYFAKKGKGMLOTPEGEARFIEMEP--TIYVPPYWAHRTNT-GDKPFIFALY-P---ADAGHDYGTI-----A-E</p> <p>-----stkrLpsylsafsknfleasydsydeieqtlqeeqegvirkmpk<br/> kgkggmlqtpegearfiemepgtivvppywahtintgdkpfifalypadaghd<del>vgtiaekGFSKIVVEENG</del>KVV-VKDNPK-----</p> <p><b>Proposed:</b> aliSize=126 (resi) RMSD=2.10 (Å)<br/> aqnp--YLFRS-----NKFLTLFKN-----OHGSLRLLORfNedtekl<del>enlrdy</del>RVLEYCSKPNITLLPHSD---SDLLVLEFOAILLVN-PDGRDITYKIDQ--DATKIQAGTPFYLINPdNnONLRIKFAITfrprgTVEDEFLSStkrLpsyls<br/> ---yKEP-GVKldfetgiiENAKKSVRRlsdmkgyfideeawkmveegdpVYEVYAIQEE-EE-----ekeGLNFATTVLYGKvgnEFFmtkgYHskidRAEVYFAKKGKGMLOTPEGEARFIEMEP--TIYVPPYWAHRTNT-GDKPFIFALY-P---ADAGHDYGTI-----A-E</p> <p><del>stkrLpsylsafsknfleasydsydeieqtlqeeqegvirkmpk</del><br/> <del>-----FSK-IV-----VE--E-NGK--VV--VKdnpk</del></p> |

|     |                                       |   |       |                                                                                                                                                                                                                                                                                                                                                                                                                                                                                                                                                                                                                                                                                                                                                                                                                                                                                                                                                                                                                                                                                                                                                                                                                                                                                                                                                                                                                                                                                                                                                                                                                                                                                                                                                                                                                                                                                                                                                                                                                                                                                                                                                 |
|-----|---------------------------------------|---|-------|-------------------------------------------------------------------------------------------------------------------------------------------------------------------------------------------------------------------------------------------------------------------------------------------------------------------------------------------------------------------------------------------------------------------------------------------------------------------------------------------------------------------------------------------------------------------------------------------------------------------------------------------------------------------------------------------------------------------------------------------------------------------------------------------------------------------------------------------------------------------------------------------------------------------------------------------------------------------------------------------------------------------------------------------------------------------------------------------------------------------------------------------------------------------------------------------------------------------------------------------------------------------------------------------------------------------------------------------------------------------------------------------------------------------------------------------------------------------------------------------------------------------------------------------------------------------------------------------------------------------------------------------------------------------------------------------------------------------------------------------------------------------------------------------------------------------------------------------------------------------------------------------------------------------------------------------------------------------------------------------------------------------------------------------------------------------------------------------------------------------------------------------------|
| 189 | <p>1cauA (181)</p> <p>1lr5B (159)</p> | C | 11.95 | <p><b>TM-align:</b> aliSize=129 (resi) RMSD=2.99 (Å)<br/> --AONNpyLFRS--KFLTLFKNOHGLRLLORFNEDTEKLENLRDYRLECYSKPNTLLLP--HSDSLVLEGOAILVIVN-PD---RDTYKLDGDAIKIAGTFYLIINPNNONRIKFAITfrrpGTVEDFLSSKRLn-----SYLsafsknfleasydspsydieqtlqeeqeg<br/> scVRDnS--VVDIsqMPOSSYGIEGLSHITVAGALNHG-----MKEVEWLOQTISGQRTPIRHSCEEVFTVTKKGTLMGSSSLkypqPQEIPIFFNTTFSIPVNDHQVWSDEHEDQVVIISR---PPAKIILYDD----wsmphtaAV-----</p> <p>vivkmpk-----<br/> -----kfpfvwdedcfeaa</p> <p><b>SARST:</b> aliSize=89 (resi) RMSD=2.34 (Å)<br/> aqnnpylfrsnkfltlfknqhgslrllqrfnedtekenlr-----DYRLECYSKPNTLLLP--HSDSLVLEGOAILVIVNPDG----RDTYKLDGDAIKIAGTFYLIINPNNONRIKFAITfrrpG--TVEDFLSS-----<br/> -----scvrDNSlvrdisqmpqssygieglshitvagalnmgkEVEWLOQTISGQRTPIRHSCEEVFTVTKKGTLMGSSSLkypqPQEIPIFFNTTFSIPVNDHQVWSDEHEDQVVIISR---SRppAKIFLYDDwsmphtaav</p> <p>-----stkrLpsylsafsknfleasydspsydieqtlqeeqegvivkmpk<br/> 1kfpfvwdedcfeaa-----</p> <p><b>BLAST:</b> aliSize=11 (resi) iden=5.66% (9/159) simi=6.92% (11/159)<br/> aqnnpylfrsnkfltlfknqhgslrllqrfnedtekenlrDYRLECYSKPNTLLP-----scvrDNSlvrdisqmpqssygieglshitvagalnmgkEVEWLOQTISGQRTPIRHSCEEVFTVTKKGTLMGSSSLkypqPQEIPIFFNTTFSIPVNDHQVWSDEHEDQVVIISR---PPAKIILYDDwsmphtaav</p> <p>-----egqailvlnpdgrdtykldqgdaikiqagtpfyllnpdnnqnlriLkfaITfrrpGTVEDFLSSKRLpsylsafsknfleasydspsydieqtlqeeqegvivkmpk<br/> ddwsmphtaav1kfpfvwdedcfeaa-----</p> <p><b>Proposed:</b> aliSize=137 (resi) RMSD=2.44 (Å)<br/> --AONNpyLFRS--KFLTLFKNOHGLRLLORFNEDTEKLENLRDYRLECYSKPNTLLLP--HSDSLVLEGOAILVIVN-PD---RDTYKLDGDAIKIAGTFYLIINPNNONRIKFAITfrrpGTVEDFLSSKRL--PSYLsAFSKNLEAS-----ydspsydieqtl<br/> scVRDnS--VVDIsqMPOSSYGIEGLSHITVAGALNHG-----MKEVEWLOQTISGQRTPIRHSCEEVFTVTKKGTLMGSSSLkypqPQEIPIFFNTTFSIPVNDHQVWSDEHEDQVVIISR---PPAKIILYDDWSMPHTAAV--LKF-PVWDEdcfeaa-----</p> <p>qeeqegvivkmpk</p>                                                                                                                                                                                                                                                                                                                                           |
| 190 | <p>1cauA (181)</p> <p>1x7nA (189)</p> | C | 5.52  | <p><b>TM-align:</b> aliSize=124 (resi) RMSD=3.30 (Å)<br/> aqnnpYLFRS--NKFLTLFKN-----OHGSLRLLORFNEDTEKLENLRDYRLECYSKPNTLLP--HSDSLVLEGOAILVIVN-PDGRDRTYKLDGDAIKIAGTFYLIINPNNONRIKFAITfrrpGTVEDFLSSKRLnSvl<br/> -----mmyKEP--GVKvdfetgiiEGAKKSVRRlsdmegyfvderawkelvekedpVVEVYAVEQ-E-----KEGLNFATTVLYGkvkgefFTKGfHAKldRAEVYVAKKGGMILQTEGDAKWI SMEP--TVVYVPPYWAHRTVNI--GDEPFIFAIY-P---ADAGHDYGTI-----A--</p> <p>safsknfleasvdspsydieqtlqeeqegvivk-----MPK-----<br/> -----EK-----gfskivIEengekvvdnprwk</p> <p><b>SARST:</b> aliSize=89 (resi) RMSD=16.86 (Å)<br/> aqnnpylfrsnkfltlfknqhgslrllqrfnedtekenlr-----DYRLECYSKPNTLLP--HSDSLVLEGOAILVIVN-PDGRDRTYKLDGDAIKIAGTFYLIINPNNONRIKFAITfrrpGTVEDFLSSKRLnSvl<br/> -----mmyKEP--GVKvdfetgiiEGAKKSVRRlsdmegyfvderawkelvekedpVVEVYAVEQ-E-----KEGLNFATTVLYGkvkgefFTKGfHAKldRAEVYVAKKGGMILQTEGDAKWI SMEP--TVVYVPPYWAHRTVNI--GDEPFIFAIY-P---ADAGHDYGTI-----A--</p> <p>--ILKFAITfrrpGTVEDFLSSKRLnSvlSafsknfleasvdspsydieqtlqeeqegvivkmpk<br/> pyWAHRTVNI--GDEPFIFAIY-P---ADAGHDYGTI-----A--</p> <p><b>BLAST:</b> aliSize=12 (resi) iden=4.97% (9/181) simi=6.63% (12/181)<br/> aqnnpylfrsnkfltlfknqhgslrllqrfnedtekenlrDYRLECYSKPNTLLP--HSDSLVLEGOAILVIVN-PDGRDRTYKLDGDAIKIAGTFYLIINPNNONRIKFAITfrrpGTVEDFLSSKRLnSvl<br/> -----mmyKEP--GVKvdfetgiiEGAKKSVRRlsdmegyfvderawkelvekedpVVEVYAVEQ-E-----KEGLNFATTVLYGkvkgefFTKGfHAKldRAEVYVAKKGGMILQTEGDAKWI SMEP--TVVYVPPYWAHRTVNI--GDEPFIFAIY-P---ADAGHDYGTI-----A--</p> <p>RPTV--EDFLS-----stkrLpsylsafsknfleasydspsydieqtlqeeqegvivkmpk<br/> YCKVgKE--FTkghfhakldraevyvalkgkgmlqtpegdakwismpgtvvyvppywhartvniGDEPFIFAIY-P---ADAGHDYGTI-----A--</p> <p><b>Proposed:</b> aliSize=132 (resi) RMSD=2.40 (Å)<br/> aqnnpYLFRS--NKFLTLFKN-----OHGSLRLLORFNEDTEKLENLRDYRLECYSKPNTLLP--HSDSLVLEGOAILVIVN-PDGRDRTYKLDGDAIKIAGTFYLIINPNNONRIKFAITfrrpGTVEDFLSSKRLnSvl<br/> -----mmyKEP--GVKvdfetgiiEGAKKSVRRlsdmegyfvderawkelvekedpVVEVYAVEQ-E-----KEGLNFATTVLYGkvkgefFTKGfHAKldRAEVYVAKKGGMILQTEGDAKWI SMEP--TVVYVPPYWAHRTVNI--GDEPFIFAIY-P---ADAGHDYGTI-----A--</p> <p>-.PSYLs--afsKnLEASyD--SPYDeiEOTLQEEqegvivkmpk<br/> 1ackG--Fsk--I--VIE-ENgeVKVV--DNPR-WK-----</p> |
| 191 | <p>1cauA (181)</p> <p>2ixkA (184)</p> | N | 9.94  | <p><b>TM-align:</b> aliSize=76 (resi) RMSD=3.89 (Å)<br/> aqnnpylfrsnkfltlfknqhgslrllqrfnedtekenlrDYRLECYSKPNTLLP--HSDSLVLEGOAILVIVN-PDGRDRTYKLDGDAIKIAGTFYLIINPNNONRIKFAITfrrpGTVEDFLSSKRLnSvl<br/> -----smskatrlaipdvlfeprvfGDDRGFFESYNQRAFEACGHpvsfvQDNHSRSARGVIRGLHYQIRqaqKLRATLGEVFDADLrrgsptFGQWGERLSAENKROMWIPAGFAHGfVVLSEYAEFLYKTDFWAPEHE--RCIVWndpelkidwplQDAP--LSE</p> <p>ONLR--ILKFAI-----TFRRPPTVedfflssstkrLpsylsafsknfleasydspsydieqtlqeeqegvivkmpk-----<br/> DFWApeHERCIVWndpelkidwplQDAPLSEK-----drqkafadadcfp</p> <p><b>SARST:</b> aliSize=139 (resi) RMSD=12.65 (Å)<br/> aqnnpYLFRS--NKFLTLFKN-----OHGSLRLLORFNEDTEKLENLRDYRLECYSKPNTLLP--HSDSLVLEGOAILVIVN-PDGRDRTYKLDGDAIKIAGTFYLIINPNNONRIKFAITfrrpGTVEDFLSSKRLnSvl<br/> -----smskatrlaipdvlfeprvfGDDRGFFESYNQRAFEACGHpvsfvQDNHSRSARGVIRGLHYQIRqaqKLRATLGEVFDADLrrgsptFGQWGERLSAENKROMWIPAGFAHGfVVLSEYAEFLYKTDFWAPEHE--RCIVWndpelkidwplQDAP--LSE</p> <p>FLeASYSPYDE----ieqtlqeeqegvivkmpk<br/> KD--RQKAFADadcfp-----</p> <p><b>BLAST:</b> aliSize=36 (resi) iden=9.39% (17/181) simi=19.89% (36/181)<br/> aqnnpylfrsnkfltlfknqhgslrllqrfnedtekenlrDYRLECYSKPNTLLP--HSDSLVLEGOAILVIVN-PDGRDRTYKLDGDAIKIAGTFYLIINPNNONRIKFAITfrrpGTVEDFLSSKRLnSvl<br/> -----smskatrlaipdvlfeprvfGDDRGFFESYNQRAFEACGHpvsfvQDNHSRSARGVIRGLHYQIRqaqKLRATLGEVFDADLrrgsptFGQWGERLSAENKROMWIPAGFAHGfVVLSEYAEFLYKTDFWAPEHE--RCIVWndpelkidwplQDAP--LSE</p> <p>-----LNPNNONRIKFAITfrrpGTVEDFLSSKRLnSvlSafsknfleasydspsydieqtlqeeqegvivkmpk<br/> gqwwgeRLSAENKROMWIPAGFAHGfVVLSEYAEFLYKTDFWAPEHERCIVWndpelkidwplQDAPLSEKDRQKAFADadcfp-----</p> <p><b>Proposed:</b> aliSize=127 (resi) RMSD=2.24 (Å)<br/> --AONNpyLFRS--KFLTLFKNOHGLRLLORFNEDTEKLENLRDYRLECYSKPNTLLP--HSDSLVLEGOAILVIVN-PDGRDRTYKLDGDAIKIAGTFYLIINPNNONRIKFAITfrrpGTVEDFLSSKRLnSvl<br/> smskatrlaipdvlfeprvfGDDRGFFESYNQRAFEACGHpvsfvQDNHSRSARGVIRGLHYQIRqaqKLRATLGEVFDADLrrgsptFGQWGERLSAENKROMWIPAGFAHGfVVLSEYAEFLYKTDFWAPEHERCIVWndpelkidwplQDAPLSEKDRQKAFADadcfp-----</p> <p>fsknfleasydspsydieqtlqeeqegvivkmpk<br/> -----SEKDRQKAFADadcfp-----</p>                                                                                  |



|     |                                             |   |                                                                                                                                                                                                                                                                                                                                                                                                                                                                                                                                                                                                                                                                                                                                                                                                                                                                                                                                                                                                                                                                                                                                                                                                                                                                                                                                                                                                                                                                                                                                                                                                                                                                                                                                                                                                                                            |
|-----|---------------------------------------------|---|--------------------------------------------------------------------------------------------------------------------------------------------------------------------------------------------------------------------------------------------------------------------------------------------------------------------------------------------------------------------------------------------------------------------------------------------------------------------------------------------------------------------------------------------------------------------------------------------------------------------------------------------------------------------------------------------------------------------------------------------------------------------------------------------------------------------------------------------------------------------------------------------------------------------------------------------------------------------------------------------------------------------------------------------------------------------------------------------------------------------------------------------------------------------------------------------------------------------------------------------------------------------------------------------------------------------------------------------------------------------------------------------------------------------------------------------------------------------------------------------------------------------------------------------------------------------------------------------------------------------------------------------------------------------------------------------------------------------------------------------------------------------------------------------------------------------------------------------|
| 192 | <p>1cauA (181)</p> <hr/> <p>2pakB (134)</p> | N | <p>11.19</p> <p><b>TM-align:</b> aliSize=90 (resi) RMSD=2.66 (Å)<br/> aqnnpylfrsnkfltlfknqhgslrllqrfnedteklelenl-----RDYRVLEYCSKPNLTLLPHHS-DSDLVLVLEFOAILVIVNPDGRDITYKIDOG-DAIKIOAGTTPFYIINPdNnONLRLIKFAITfrrpgTVED--FFLSstkrpSy-Lsafsknfleasy<br/> -----enkvinfkkiidsrgslvaieenkniPfsIKRYYIFdTGEEPRGFANKKLEQVLVCLNNSCRVIDDGNIIQEITLSPaVGLYVGPVAVWHEMHDF-S-SDCVMVLA-SD-----YYDEtdYIRQ-----Y-dN-----</p> <p>dspydeieqtlqeeqegvirkmpk-----<br/> -----fkkyiakinl</p> <p><b>SARST:</b> aliSize=102 (resi) RMSD=10.36 (Å)<br/> aqnnpyl--FRSNKFLTLfKNOHGSRLRLORfNEDTeklenlR--DYRVLEYCSKPNLTLLPHHSDDL-LVLVLEFOAILVIVNPDGRDITYKIDOG-DAIKIOAGTTPFYIINPDNNONLRIK-----fai tfr rpgt vedffl sstkr lpsyl safsknfleasyds<br/> -----enKVI--FKKI--IDSRGSLVAIEE-NKNI-----PfsIKRYYIFdTGEEPRGFANKKLEqVLVCLNNSCRVIDDGNIIQEITLSPaVGLYVGPVAVWHEMHDFSSDCVMVLAAsdydetdyiraydnfkkyiakinl-----</p> <p>pydeieqtlqeeqegvirkmpk<br/> -----</p> <p><b>BLAST:</b> aliSize=16 (resi) iden=7.46% (10/134) simi=11.94% (16/134)<br/> aqnnpylfrsnkfltlfknqhgslrllqrfnedteklelenlrdyrvleycskpnltllphhsdsdlvlvleg-----OAILVLVpdRDTYKIDODAI-KIOAGT-----<br/> -----enkvinfkkiidsrgslvaieenkniPfsIKRYYIFdtkgeprgfhankeIQVLCNNSCRVIDDGNIIQEITLSPaVGLYVGPVAVWHEMHDFSSDCVMVLAAsdydet<br/> -----fyllnpdnnqnrlrikfai tfr rpgt vedffl sstkr lpsyl safsknfleasyds pydeieqtlqeeqegvirkmpk<br/> dyiraydnfkkyiakinl-----</p> <p><b>Proposed:</b> aliSize=113 (resi) RMSD=2.32 (Å)<br/> aqnnpYLFRSnlTLTIKNOHGSRLRL--qRFNedteklelenlRDYRVLEYCSKPNLTLLPHHS-DSDLVLVLEFOAILVIVNPDGRDITYKIDOG-DAIKIOAGTTPFYIINPdNnONLRLIKFAITfrrpgTVE--FFLS--stkr lpsyl-----safsknfleasyds pydeieqtlq<br/> -----ENKVI--FKKI--IDSRGSLVAIEE-NKNI-----PfsIKRYYIFdTGEEPRGFANKKLEQVLVCLNNSCRVIDDGNIIQEITLSPaVGLYVGPVAVWHEMHDF-S-SDCVMVLA-SD-----YYDEtdYIRQyd-----Nfkkyiakinl-----</p> <p>eeqegvirkmpk<br/> -----</p>     |
| 193 | <p>1cauA (181)</p> <hr/> <p>2pamA (135)</p> | N | <p>9.63</p> <p><b>TM-align:</b> aliSize=90 (resi) RMSD=2.63 (Å)<br/> aqnnpylfrsnkfltlfknqhgslrllqrfnedteklelenl-----RDYRVLEYCSKPNLTLLPHHS-DSDLVLVLEFOAILVIVNPDGRDITYKIDOG-DAIKIOAGTTPFYIINPdNnONLRLIKFAITfrrpgTVED--F-FLSstkr lpsyl safsknfleasy<br/> -----enkvinfkkiidsrgslvaieenkniPfsIKRYYIFdTGEEPRGFANKKLEQVLVCLNNSCRVIDDGNIIQEITLSPaVGLYVGPVAVWHEMHDF-S-SDCVMVLA-SD-----YYDEtdYiRQY-----DN-----</p> <p>dspydeieqtlqeeqegvirkmpk-----<br/> -----fkkyiakinle</p> <p><b>SARST:</b> aliSize=94 (resi) RMSD=9.02 (Å)<br/> aqnnpylfrsnkfltl-----FKNOHGSRLRLORfNEDTeklenlRDYRVLEYCSKPNLTLLPHHS-DSDLVLVLEFOAILVIVNPDGRDITYKIDOG-DAIKIOAGTTPFYIINPDNNONLRIK-----fai tfr rpgt vedffl sstkr lpsyl safsk<br/> -----enkvinfkKIIDSRGSLVAIEE-NKNI-----PfsIKRYYIFdTGEEPRGFANKKLEQVLVCLNNSCRVIDDGNIIQEITLSPaVGLYVGPVAVWHEMHDFSSDCVMVLAAsdydetdyiraydnfkkyiakinle-----</p> <p>nfleasyds pydeieqtlqeeqegvirkmpk<br/> -----</p> <p><b>BLAST:</b> aliSize=16 (resi) iden=7.41% (10/135) simi=11.85% (16/135)<br/> aqnnpylfrsnkfltlfknqhgslrllqrfnedteklelenlrdyrvleycskpnltllphhsdsdlvlvleg-----OAILVLVpdRDTYKIDODAI-KIOAGT-----<br/> -----enkvinfkkiidsrgslvaieenkniPfsIKRYYIFdtkgeprgfnankkeIQVLCNNSCRVIDDGNIIQEITLSPaVGLYVGPVAVWHEMHDFSSDCVMVLAAsdydet<br/> -----fyllnpdnnqnrlrikfai tfr rpgt vedffl sstkr lpsyl safsknfleasyds pydeieqtlqeeqegvirkmpk<br/> dyiraydnfkkyiakinle-----</p> <p><b>Proposed:</b> aliSize=112 (resi) RMSD=2.14 (Å)<br/> aqnnpYLFRSnlTLTIKNOHGSRLRL--ORFNedteklelenlRDYRVLEYCSKPNLTLLPHHS-DSDLVLVLEFOAILVIVNPDGRDITYKIDOG-DAIKIOAGTTPFYIINPdNnONLRLIKFAITfrrpgTVE--DFFL--stkr lpsyl-----safsknfleasyds pydeieqtl<br/> -----ENKVI--FKKI--IDSRGSLVAIEE-NKNI-----PfsIKRYYIFdTGEEPRGFANKKLEQVLVCLNNSCRVIDDGNIIQEITLSPaVGLYVGPVAVWHEMHDF-S-SDCVMVLA-SD-----YYDEtdYiRQYd-----Nfkkyiakinle-----</p> <p>lqeeqegvirkmpk<br/> -----</p> |
| 194 | <p>1cm0B (161)</p> <hr/> <p>1m44A (177)</p> | M | <p>6.83</p> <p><b>TM-align:</b> aliSize=145 (resi) RMSD=3.18 (Å)<br/> KVIEFHVGNslnqkpnkklmwlvglonvfsholprmpkYITRLVfDpkhktlAlkdRVIGGICFRMFpS-----SOGFTEIVFCVTSNEOVKGYGTHMNLHKEYHIKhdILNFLTyaDEYIGYFKKOFskEIKIPkTKYVGYik-----DYEg-ATLMGCELNp-----<br/> VHTARLVHT-A--D-L--DSETRQDIRQMTGAFAGDFTTDWEHT-L-GGMHALIWHHGAIIAHAAVIQRRliyrnaLRCGYVEGVAVRADWRGQRLVSA L DAVEQVMRGA-YQLGALSSSARARRLYASRWLPWHG-PT--SVLA--ptgpvrTPDdGTVFVLPID-isl dtsaelmcdwragdvw</p> <p><b>SARST:</b> aliSize=127 (resi) RMSD=13.22 (Å)<br/> kviefhvngslnqkpnkklmwlvglonvfsholprmpkYITRLVfDpkhktlAlkdRVIGGICFRMFpS-----SOGFTEIVFCVTSNEOVKGYGTHMNLHKEYHIKhdILNFLTyaDEYIGYFKKOFskEIK-----IPKTKYVGYIKDYE<br/> -----vhtarlvhtadldsetrqdirqmvTGAFAGDFTTDWEHTlggmhalIWHHGAIIAHAAVIQRRliyrnaLRCGYVEGVAVRADWRGQRLVSA L DAVEQVMRGA-YQLGALSSSARARRLYASRWLPWHgptsvlapTgpvrTPDDGTVFVLPID-isl dtsaelmcdwr</p> <p>GAT---MGCELN-----p<br/> DTSdtsAELMCDwragdvw-</p> <p><b>BLAST:</b> aliSize=11 (resi) iden=3.73% (6/161) simi=6.83% (11/161)<br/> kviefhvngslnqkpnkklmwlvglonvfsholprmpkeyitrlvfdpkhktlAlkdgrviggicfrmfpsqgftvfcavtsneovkgygthlmnlhkeyhikhdiInfltyadeyaigyfkkgfskEIKIPkTKYV-----vhtarlvhtadldsetrqdirqmvTGAFAGDFTTDWEHTlggmhal<br/> -----iwhhgaiiahaaviqrriyrnalrcGVYK-----DYEgATMGCELN-----p<br/> -----DTSdtsAELMCDwragdvw-----</p> <p><b>Proposed:</b> aliSize=142 (resi) RMSD=2.43 (Å)<br/> kv-TEFHVGNslnqkpnkklmwlvglonvfsholprmpkYITRLVfDpkhktlAlkdRVIGGICFRMFpS-----OGFTEIVFCVTSNEOVKGYGTHMNLHKEYHIKhdILNFLTyaDEYIGYFKKOFskEIK-----kipkTKYVGYIKDY--EGATLMGCELN-----<br/> -----vHTARLVHTA--D-L--DSETRQDIRQMTGAFAGDFTTDWEHT-L-GGMHALIWHHGAIIAHAAVIQRRliyrnaLRCGYVEGVAVRADWRGQRLVSA L DAVEQVMRGA-YQLGALSSSARARRLYASRWLPWHgptsvl--A-PT-GP-VRTpddDG-TVFVLPID-isl dtsaelmcdwr<br/> -----pc<br/> agdvw--</p>                                                            |

|     |                                             |   |      |                                                                                                                                                                                                                                                                                                                                                                                                                                                                                                                                                                                                                                                                                                                                                                                                                                                                                                                                                                                                                                                                                                                                                                        |
|-----|---------------------------------------------|---|------|------------------------------------------------------------------------------------------------------------------------------------------------------------------------------------------------------------------------------------------------------------------------------------------------------------------------------------------------------------------------------------------------------------------------------------------------------------------------------------------------------------------------------------------------------------------------------------------------------------------------------------------------------------------------------------------------------------------------------------------------------------------------------------------------------------------------------------------------------------------------------------------------------------------------------------------------------------------------------------------------------------------------------------------------------------------------------------------------------------------------------------------------------------------------|
| 195 | <p>1cm0B (161)</p> <hr/> <p>1s3zB (145)</p> | C | 8.97 | <p><b>TM-align:</b> aliSize=125 (resi) RMSD=2.77 (Å)<br/> kvTEFHVvgnslnqkpnkILMWVGLONVFSHQLrmpkEYITRLVFD--PK--HKTLLALIKDGRVIGICFRMFPS-----OGFTEIVFCAVTSNEOVKYGTHMNLKEYHIKHDILNFLTAD--FY--AIGYFKKQGFSEkEkipktyvgvik-DYEGatlmgcelpn----</p> <p><b>SARST:</b> aliSize=112 (resi) RMSD=3.18 (Å)<br/> kviefhvgnslnqkpnkii-----LMWVGLONVFSHQLrmpkEYITRLVFD--PK--HKTLLALIKDGRVIGICFRMFPSOG-----FTEIVFCAVTSNEOVKYGTHMNLKEYHIKHDILNFLTAD--FY--AIGYFKKQGFSE-----kEkipktyvgvikdyegatlmgcelpn-----</p> <p><b>BLAST:</b> aliSize=16 (resi) iden=6.90% (10/145) simi=11.03% (16/145)<br/> kviefhvgnslnqkpnkilmwlvglqnvfshqlprmpkeyitrlvfdpkhktlalikdgrviggicfrmfpsqgfteivfcavtsneqvkyggt-----MNLKEYHIKHDILNFLTAD--FY--AIGYFKKQGFSE-----kEkipktyvgvikdyegatlmgcelpn-----</p> <p><b>Proposed:</b> aliSize=130 (resi) RMSD=2.14 (Å)<br/> kvTEFHVvgnslnqkpnkILMWVGLONVFSHQLrmpkEYITRLVFD--PK--HKTLLALIKDGRVIGICFRMFPS-----OGFTEIVFCAVTSNEOVKYGTHMNLKEYHIKHDILNFLTAD--FY--AIGYFKKQGFSEkEkipktyvgvikdyegATLMGCELNP-c-----MDIRQM-----NKTHLEHWRLRKQLW--GHPDDAHLADGEEiIQAdhLASFIAMADGVAIGFADASTRHdyvngcdsSPVVFLEGIPLPSFRQVAKQIAAVQRWGTNKGCREMASDTSpNtiSQKVHQAALGFEET-----ERVIFYRKRCc-----</p> |
| 196 | <p>1cm0B (161)</p> <hr/> <p>1s5kA (153)</p> | C | 7.84 | <p><b>TM-align:</b> aliSize=126 (resi) RMSD=2.90 (Å)<br/> kvTEFHVvgnslnqkpnkILMWVGLONVFSHQLrmpkEYITRLVFD--PK--HKTLLALIKDGRVIGICFRMFPS-----OGFTEIVFCAVTSNEOVKYGTHMNLKEYHIKHDILNFLTAD--FY--AIGYFKKQGFSEkEkipktyvgvik-DYEGatlmgcelpn----</p> <p><b>SARST:</b> aliSize=112 (resi) RMSD=3.20 (Å)<br/> kviefhvgnslnqkpnkii-----LMWVGLONVFSHQLrmpkEYITRLVFD--PK--HKTLLALIKDGRVIGICFRMFPSOG-----FTEIVFCAVTSNEOVKYGTHMNLKEYHIKHDILNFLTAD--FY--AIGYFKKQGFSE-----kEkipktyvgvikdyegatlmgcelpn-----</p> <p><b>BLAST:</b> aliSize=16 (resi) iden=6.54% (10/153) simi=10.46% (16/153)<br/> kviefhvgnslnqkpnkilmwlvglqnvfshqlprmpkeyitrlvfdpkhktlalikdgrviggicfrmfpsqgfteivfcavtsneqvkyggt-----MNLKEYHIKHDILNFLTAD--FY--AIGYFKKQGFSE-----kEkipktyvgvikdyegatlmgcelpn-----</p> <p><b>Proposed:</b> aliSize=130 (resi) RMSD=2.15 (Å)<br/> kvTEFHVvgnslnqkpnkILMWVGLONVFSHQLrmpkEYITRLVFD--PK--HKTLLALIKDGRVIGICFRMFPS-----OGFTEIVFCAVTSNEOVKYGTHMNLKEYHIKHDILNFLTAD--FY--AIGYFKKQGFSEkEkipktyvgvikdyegATLMGCELNP-c-----MDIRQM-----NKTHLEHWRLRKQLW--GHPDDAHLADGEEiIQAdhLASFIAMADGVAIGFADASTRHdyvngcdsSPVVFLEGIPLPSFRQVAKQIAAVQRWGTNKGCREMASDTSpNtiSQKVHQAALGFEET-----ERVIFYRKRCc-----</p> |
| 197 | <p>1cm0B (161)</p> <hr/> <p>2vbqB (144)</p> | C | 8.33 | <p><b>TM-align:</b> aliSize=124 (resi) RMSD=2.81 (Å)<br/> kviEFHVvgnslnqkpnkILMWVGLONVFSHQLrmpkEYITRLVFD--PK--HKTLLALIKDGRVIGICFRMFPS-----OGFTEIVFCAVTSNEOVKYGTHMNLKEYHIKHDILNFLTAD--FY--AIGYFKKQGFSEkEkipktyvgvik-DYEGatlmgcelpn----</p> <p><b>SARST:</b> aliSize=112 (resi) RMSD=3.66 (Å)<br/> kviefhvgnslnqkpnkii-----LMWVGLONVFSHQLrmpkEYITRLVFD--PK--HKTLLALIKDGRVIGICFRMFPSOG-----FTEIVFCAVTSNEOVKYGTHMNLKEYHIKHDILNFLTAD--FY--AIGYFKKQGFSE-----kEkipktyvgvikdyegatlmgcelpn-----</p> <p><b>BLAST:</b> aliSize=16 (resi) iden=6.94% (10/144) simi=11.11% (16/144)<br/> kviefhvgnslnqkpnkilmwlvglqnvfshqlprmpkeyitrlvfdpkhktlalikdgrviggicfrmfpsqgfteivfcavtsneqvkyggt-----MNLKEYHIKHDILNFLTAD--FY--AIGYFKKQGFSE-----kEkipktyvgvikdyegatlmgcelpn-----</p> <p><b>Proposed:</b> aliSize=128 (resi) RMSD=2.10 (Å)<br/> kviEFHVvgnslnqkpnkILMWVGLONVFSHQLrmpkEYITRLVFD--PK--HKTLLALIKDGRVIGICFRMFPS-----OGFTEIVFCAVTSNEOVKYGTHMNLKEYHIKHDILNFLTAD--FY--AIGYFKKQGFSEkEkipktyvgvikdyegATLMGCELNP-c-----MDIRQM-----NKTHLEHWRLRKQLW--GHPDDAHLADGEEiIQAdhLASFIAMADGVAIGFADASTRHdyvngcdsSPVVFLEGIPLPSFRQVAKQIAAVQRWGTNKGCREMASDTSpNtiSQKVHQAALGFEET-----ERVIFYRKRCc-----</p> |



|     |                |   |       |                                                                                                                                                                                                                                                                                                                                                                                                                                                                                                                                                                                                                                                                                                                                                                                                                                                                                                                                                                                                                                                                                                                                                                                                                                                                                                                                                                                              |
|-----|----------------|---|-------|----------------------------------------------------------------------------------------------------------------------------------------------------------------------------------------------------------------------------------------------------------------------------------------------------------------------------------------------------------------------------------------------------------------------------------------------------------------------------------------------------------------------------------------------------------------------------------------------------------------------------------------------------------------------------------------------------------------------------------------------------------------------------------------------------------------------------------------------------------------------------------------------------------------------------------------------------------------------------------------------------------------------------------------------------------------------------------------------------------------------------------------------------------------------------------------------------------------------------------------------------------------------------------------------------------------------------------------------------------------------------------------------|
| 201 | 1d7eA<br>(119) | N | 14.16 | <p><b>TM-align:</b> aliSize=101 (resi) RMSD=2.13 (Å)<br/> vafgsedientla-KMDdGQLDGLAFGAIQLDGDGNILQYNAEGDITGRDPKQVIGKNFFKdVAPC--TDSPEFYGKFKEGVASGN-LNT--MFEYTFDYQM-TPTKVKVHMKKAL-----SYWVFVKRV<br/> -----gIFF-PALEQNMMGAVLINENDEVMFFNPAEKLWYKREEVIGNNID--MLIPrdLRPA-HPEYIRHNREGGKaRVEgmSRLEQLEKKDgSKIWTRFALSvSaegkvYLLALVRD-</p> <p><b>SARST:</b> aliSize=98 (resi) RMSD=3.37 (Å)<br/> vafgsedientlakmd---DGQLDGLAFGAIQLDGDGNILQYNAEGDITGRDPKQVIGKNFFKdVAPCTdsPEFYGKFKEGVASGNLNTM----FYEYTFDY--QmTPTKVKVHMKK-----ALSYWVFVK-rv<br/> -----giffPALAQNMGGAVLINENDEVMFFNPAEKLWYKREEVIGNNIDMLIPRDL--RPAHPEYIRHNREGGKARVEgmSRLEQLEKKDg-SKIWTRFALSvsaegKVYLLALVRd--</p> <p><b>BLAST:</b> aliSize=29 (resi) iden=13.27% (15/113) simi=25.66% (29/113)<br/> vafgsedientlakmdldgldglaf-----GAIQLDGDGNILQYNAEGDITGRDPKQVIGKNFF----KIVAPCTdsPEFYGKFKEG-----vasgnlntmfeytfdyqmtptkvkvhmkkalsywfvrkrv<br/> -----giffpaleqnmngavlinendevmffnPAEKLWYKREEVIGNNIDmliprdLRPA--HPEYIRHNREGGkarvegmsrelqlekkdgskiwtrfalskvsagkvvylalvr-----</p> <p><b>Proposed:</b> aliSize=103 (resi) RMSD=2.10 (Å)<br/> vafgsedientLaKMDdGQLDGLAFGAIQLDGDGNILQYNAEGDITGRDPKQVIGKNFFKdVAPC-TDSPEFYGKFKEGVASGN-LNT-MFEYTFDYQM-TPTKVKVHMKKAL-----SYWVFVKR-v<br/> -----GIFFP--ALEQNMMGAVLINENDEVMFFNPAEKLWYKREEVIGNNID-MLIPrdLRPA-HPEYIRHNREGGKaRVEgmSRLEQLEKKDgSKIWTRFALSvSaegkvYLLALVRDh-</p>                                        |
|     | 1v9zA<br>(113) |   |       |                                                                                                                                                                                                                                                                                                                                                                                                                                                                                                                                                                                                                                                                                                                                                                                                                                                                                                                                                                                                                                                                                                                                                                                                                                                                                                                                                                                              |
| 202 | 1d7eA<br>(119) | N | 14.04 | <p><b>TM-align:</b> aliSize=102 (resi) RMSD=2.16 (Å)<br/> vafgsedientla-KMDdGQLDGLAFGAIQLDGDGNILQYNAEGDITGRDPKQVIGKNFFKdVAPC--TDSPEFYGKFKEGVASGN-LNT--MFEYTFDYQM-TPTKVKVHMKKAL-----SYWVFVKRV<br/> -----gIFF-PALEQNMMGAVLINENDEVMFFNPAEKLWYKREEVIGNNID--MLIPrdLRPA-HPEYIRHNREGGKaRVEgmSRLEQLEKKDgSKIWTRFALSvSaegkvYLLALVRDA</p> <p><b>SARST:</b> aliSize=94 (resi) RMSD=4.06 (Å)<br/> vafgsedientlakmd---DGQLDGLAFGAIQLDGDGNILQYNAEGDITGRDPKQVIGKNFFKdvaPCTDSPEFYGKFKEGVAS-----GNlntMFEYTFDYQmTPTKVKVHMKK-----ALSYWVFVKR-v<br/> -----giffPALAQNMGGAVLINENDEVMFFNPAEKLWYKREEVIGNNI-----DMLIPRDLRPAHPEYIRHnreggkarvegms--RELQLEKKDg-SKIWTRFALSvsaegKVYLLALVRDa-</p> <p><b>BLAST:</b> aliSize=29 (resi) iden=13.16% (15/114) simi=25.44% (29/114)<br/> vafgsedientlakmdldgldglaf-----GAIQLDGDGNILQYNAEGDITGRDPKQVIGKNFF----KIVAPCTdsPEFYGKFKEG-----vasgnlntmfeytfdyqmtptkvkvhmkkalsywfvrkrv<br/> -----giffpaleqnmngavlinendevmffnPAEKLWYKREEVIGNNIDmliprdLRPA--HPEYIRHNREGGkarvegmsrelqlekkdgskiwtrfalskvsagkvvylalvrda-----</p> <p><b>Proposed:</b> aliSize=104 (resi) RMSD=2.10 (Å)<br/> vafgsedientLaKMDdGQLDGLAFGAIQLDGDGNILQYNAEGDITGRDPKQVIGKNFFKdVAPC-TDSPEFYGKFKEGVASGN-LNT-MFEYTFDYQM-TPTKVKVHMKKAL-----SYWVFVKRV-<br/> -----GIFFP--ALEQNMMGAVLINENDEVMFFNPAEKLWYKREEVIGNNID-MLIPrdLRPA-HPEYIRHNREGGKaRVEgmSRLEQLEKKDgSKIWTRFALSvSaegkvYLLALVRDAh</p>                                   |
|     | 1vb6A<br>(114) |   |       |                                                                                                                                                                                                                                                                                                                                                                                                                                                                                                                                                                                                                                                                                                                                                                                                                                                                                                                                                                                                                                                                                                                                                                                                                                                                                                                                                                                              |
| 203 | 1d7eA<br>(119) | N | 15.13 | <p><b>TM-align:</b> aliSize=102 (resi) RMSD=2.39 (Å)<br/> vafgsedient--La-KMDdGQLDGLAFGAIQLDGDGNILQYNAEGDITGRDPKQVIGKNFFKdVAPC--DSPEFYGKFKEGVASGNLNTMFEYTFDYOM-TPTKVKVHMKKAL-----SYWVFVKRV----<br/> -----l1P-eIFRQ-TVEHAPIAISITLTKANTLYANRAFRFTTGYGSEEVLGKNES--ILSNgtPRLVY-QALWGRLAQKK-PWSGVLNRRKDKLYLAELTVAPVineagetiYLGMRDtselh</p> <p><b>SARST:</b> aliSize=101 (resi) RMSD=3.00 (Å)<br/> vafgsedientlakmd---DGQLDGLAFGAIQLDGDGNILQYNAEGDITGRDPKQVIGKNFFKdVAPCDSPEFYGKFKEGVASGNLNTMFEYTFDYOM-TPTKVKVHMKK-----ALSYWVFVKR-----v<br/> -----l1peifrqTVEHAPIAISITLTKANTLYANRAFRFTTGYGSEEVLGKNESILSN-GTPRLVY-QALWGRLAQKKPWSGVLNRRKDKLYLAELTVAPVineagetiYLGMRDtselh-</p> <p><b>BLAST:</b> aliSize=19 (resi) iden=12.61% (15/119) simi=15.97% (19/119)<br/> vafgsedientlakmdldgldglaf-----GAIQLDGDGNILQYNAEGDITGRDPKQVIGKN-----ffkdvapctdspefygkfkEGVASGNlntmfeytfdyqmtptkvk<br/> -----l1peifrqTVEHAPIAISITLTKANTLYANRAFRFTTGYGSEEVLGKNESisngtprlvyyqalwgrlaqkkpwsvglvnrrkdktylaeltvapvineagetiYlgmhrdtseih-----<br/> vhmkkalsywfvrkrv<br/> -----</p> <p><b>Proposed:</b> aliSize=103 (resi) RMSD=1.85 (Å)<br/> vafgsedientLaKMDdGQLDGLAFGAIQLDGDGNILQYNAEGDITGRDPKQVIGKNFFKdVAPC---tdSPEFYGKFKEGVASGNLNTMFEYTFDYOM-TPTKVKVHMKKAL-----SYWVFVKRV----<br/> L---L--P-eIFRQ-----TVEHAPIAISITLTKANTLYANRAFRFTTGYGSEEVLGKNES--ILSNgttp--RLVY-QALWGRLAQKK-PWSGVLNRRKDKLYLAELTVAPVineagetiYLGMRDtselh</p> |
|     | 2gj3A<br>(119) |   |       |                                                                                                                                                                                                                                                                                                                                                                                                                                                                                                                                                                                                                                                                                                                                                                                                                                                                                                                                                                                                                                                                                                                                                                                                                                                                                                                                                                                              |





|     |                                             |   |       |                                                                                                                                                                                                                                                                                                                                                                                                                                                                                                                                                                                                                                                                                                                                                                                                                                                                                                                                                                                                                                                                                                                                                                                                                                                                                                                                                                                          |
|-----|---------------------------------------------|---|-------|------------------------------------------------------------------------------------------------------------------------------------------------------------------------------------------------------------------------------------------------------------------------------------------------------------------------------------------------------------------------------------------------------------------------------------------------------------------------------------------------------------------------------------------------------------------------------------------------------------------------------------------------------------------------------------------------------------------------------------------------------------------------------------------------------------------------------------------------------------------------------------------------------------------------------------------------------------------------------------------------------------------------------------------------------------------------------------------------------------------------------------------------------------------------------------------------------------------------------------------------------------------------------------------------------------------------------------------------------------------------------------------|
| 210 | <p>1dz3A (123)</p> <hr/> <p>1natA (119)</p> | C | 29.41 | <p><b>TM-align:</b> aliSize=107 (resi) RMSD=2.17 (Å)<br/> SIVCTADDNRELVSLLDEYISSQpDMEVIGTAYNGQDCLQMLEEKRPDILLDDIIMPHLDGLAVLERIRAGFEHQPNVIMLTAFCQEDVTKKAVELGASYFILKPFDMENlahhirqvygkt-----<br/> NEKILVDDQYGRIRLLNEVFNKEG-YQT-FQAAANGLQALDIVTKERPDLVLLDMKIPGMDGIEILKRMKV-IDENIRVIMTAYGELDMIQESKELGALTHFAKPFID-----eirдавккylpl</p> <p><b>SARST:</b> aliSize=114 (resi) RMSD=7.16 (Å)<br/> s-IKVCADDNRELVSLLDEYISSQpDMEVIGTAYNGQDCLQMLEEKRPDILLDDIIMPHLDGLAVLERIRAGFEHQPNVIMLTAFCQEDVTKKAVELGASYFILKPFDMENLAHHIRQVYG---kt<br/> -nEKILVDDQYGRIRLLNEVFNKEG-YQT-FQAAANGLQALDIVTKERPDLVLLDMKIPGMDGIEILKRMKVIDE-NIRVIMTAYGELDMIQESKELGALTHFAKPFID--DEIRDAVKKYlpl--</p> <p><b>BLAST:</b> aliSize=72 (resi) iden=30.25% (36/119) simi=60.50% (72/119)<br/> si--KVCADDNRELVSLLDEYISSQpDMEVIGTAYNGQDCLQMLEEKRPDILLDDIIMPHLDGLAVLERIRAGFEHQPNVIMLTAFCQEDVTKKAVELGASYFILKPFDMENLAHHIRQ----vygkt<br/> --nekILVDDQYGRIRLLNEVFNKEGYQTFQAA--NGLQALDIVTKERPDLVLLDMKIPGMDGIEILKRMKV-IDENIRVIMTAYGELDMIQESKELGALTHFAKPFIDIEIRDAVKKylpl-----</p> <p><b>Proposed:</b> aliSize=116 (resi) RMSD=1.71 (Å)<br/> SIVCTADDNRELVSLLDEYISSQpDMEVIGTAYNGQDCLQMLEEKRPDILLDDIIMPHLDGLAVLERIRAGFEHQPNVIMLTAFCQEDVTKKAVELGASYFILKPFDMENLAHHIROVYIGK-t<br/> NEKILVDDQYGRIRLLNEVFNKEG-YQT-FQAAANGLQALDIVTKERPDLVLLDMKIPGMDGIEILKRMKV-IDENIRVIMTAYGELDMIQESKELGALTHFAKPF--DIDEIRDAVKKYLPI-</p>                                  |
| 211 | <p>1dz3A (123)</p> <hr/> <p>1peyC (120)</p> | C | 29.17 | <p><b>TM-align:</b> aliSize=106 (resi) RMSD=2.08 (Å)<br/> -SIVCTADDNRELVSLLDEYISSQpDMEVIGTAYNGQDCLQMLEEKRPDILLDDIIMPHLDGLAVLERIRAGFEHQPNVIMLTAFCQEDVTKKAVELGASYFILKPFDMENlahhirqvygkt-----<br/> mNEKILVDDQSGIRIRLLNEVFNKEG-YQT-FQAAANGLQALDIVTKERPDLVLLDMKIPGMDGIEILKRMKV-IDENIRVIMTAYGELDMIQESKELGALTHFAKPFID-----eirдавккylpl</p> <p><b>SARST:</b> aliSize=113 (resi) RMSD=7.40 (Å)<br/> s--IKVCADDNRELVSLLDEYISSQpDMEVIGTAYNGQDCLQMLEEKRPDILLDDIIMPHLDGLAVLERIRAGFEHQPNVIMLTAFCQEDVTKKAVELGASYFILKPFDMENLAHHIROVYIGK----t<br/> -mnEKILVDDQSGIRIRLLNEVFNKEG-YQTFQAAANGLQALDIVTKERPDLVLLDMKIPGMDGIEILKRMKVIDEN-IRVIMTAYGELDMIQESKELGALTHFAKPF--DIDEIRDAVKKylpl-</p> <p><b>BLAST:</b> aliSize=72 (resi) iden=30.00% (36/120) simi=60.00% (72/120)<br/> si---KVCADDNRELVSLLDEYISSQpDMEVIGTAYNGQDCLQMLEEKRPDILLDDIIMPHLDGLAVLERIRAGFEHQPNVIMLTAFCQEDVTKKAVELGASYFILKPFDMENLAHHIRO----vygkt<br/> --mnekILVDDQSGIRIRLLNEVFNKEGYQTFQAA--NGLQALDIVTKERPDLVLLDMKIPGMDGIEILKRMKV-IDENIRVIMTAYGELDMIQESKELGALTHFAKPFIDIEIRDAVKKylpl-----</p> <p><b>Proposed:</b> aliSize=116 (resi) RMSD=1.67 (Å)<br/> -SIVCTADDNRELVSLLDEYISSQpDMEVIGTAYNGQDCLQMLEEKRPDILLDDIIMPHLDGLAVLERIRAGFEHQPNVIMLTAFCQEDVTKKAVELGASYFILKPFDMENLAHHIROVYIGK-t<br/> mNEKILVDDQSGIRIRLLNEVFNKEG-YQT-FQAAANGLQALDIVTKERPDLVLLDMKIPGMDGIEILKRMKV-IDENIRVIMTAYGELDMIQESKELGALTHFAKPF--DIDEIRDAVKKYLPI-</p>                      |
| 212 | <p>1dz3A (123)</p> <hr/> <p>1puxA (124)</p> | C | 26.83 | <p><b>TM-align:</b> aliSize=104 (resi) RMSD=2.87 (Å)<br/> --SIVCTADDNRELVSLLDEYISSQpDMEVIGTAYNGQDCLQMLEEKRPDILLDDIIMPHLDGLAVLERIRAGFEHQPNVIMLTAFCQEDVTKKAVELGASYFILKPFDMENlahhirqvygkt-----<br/> mmNEKILVDDQYGRIRLLNEVFNKEGYQTFQAAANGLQALDIVTKERPDLVLLDMKIPGMDGIEILKRMKVIDENIRVIMTAYGELDMIQESKELGALTHFAKPFID--DIDEIRDAVKKYLPLKsn</p> <p><b>SARST:</b> aliSize=99 (resi) RMSD=2.79 (Å)<br/> si----KVCADDNRELVSLLDEYISSQpDMEVIGTAYNGQDCLQMLEEKRPDILLDDIIMPHLDGLAVLERIRAGFEHQPNVIMLTAFCQEDVTKKAVELGASYFILKPFDMENlahhirqvygkt<br/> --mmnekILVDDQYGRIRLLNEVFNKEG-YQT-FQAAANGLQALDIVTKERPDLVLLDMKIPGMDGIEILKRMKVIDE-NIRVIMTAYGELDMIQESKELGALTHFAKPFID--DIDEIRDAVKKYLPLKsn-----</p> <p><b>BLAST:</b> aliSize=64 (resi) iden=28.46% (35/123) simi=52.03% (64/123)<br/> si----KVCADDNRELVSLLDEYISSQpDMEVIGTAYNGQDCLQMLEEKRPDILLDDIIMPHLDGLAVLERIRAGFEHQPNVIMLTAFCQEDVTKKAVELGASYFILKPFDMENlahhirqvygkt<br/> --mmnekILVDDQYGRIRLLNEVFNKEGYQTFQAA--NGLQALDIVTKERPDLVLLDMKIPGMDGIEILKRMKV-IDENIRVIMTAYGELDMIQESKELGALTHFAKPFID--DIDEIRDAVKKYLPLKsn-----</p> <p><b>Proposed:</b> aliSize=114 (resi) RMSD=2.43 (Å)<br/> --SIVCTADDNRELVSLLDEYISSQpDMEVIGTAYNGQDCLQMLEEKRPDILLDDIIMPHLDGLAVLERIRAGFEHQPNVIMLTAFCQEDVTKKAVELGASYFILKPFDMENLAHHIROVYIGK----kt<br/> mmNEKILVDDQYGRIRLLNEVFNKEG-YQTFQAAANGLQALDIVTKERPDLVLLDMKIPGMDGIEILKRMKVIDE--NIRVIMTAYGELDMIQESKELGALTHFAKPF--DIDEIRDAVKKYLPLKsn--</p> |

|     |                                |   |                                                                                                                                                                                                                                                                                                                                                                                                                                                                                                                                                                                                                                                                                                                                                                                                                                                                                                                                                                                                                                                                                                                                                                                                                                                                                                                                                                                                                                                                                                                                                                                                                                                                                                                                                                                                                                                                                             |
|-----|--------------------------------|---|---------------------------------------------------------------------------------------------------------------------------------------------------------------------------------------------------------------------------------------------------------------------------------------------------------------------------------------------------------------------------------------------------------------------------------------------------------------------------------------------------------------------------------------------------------------------------------------------------------------------------------------------------------------------------------------------------------------------------------------------------------------------------------------------------------------------------------------------------------------------------------------------------------------------------------------------------------------------------------------------------------------------------------------------------------------------------------------------------------------------------------------------------------------------------------------------------------------------------------------------------------------------------------------------------------------------------------------------------------------------------------------------------------------------------------------------------------------------------------------------------------------------------------------------------------------------------------------------------------------------------------------------------------------------------------------------------------------------------------------------------------------------------------------------------------------------------------------------------------------------------------------------|
| 213 | 1dz3A (123)<br><br>2hf9A (211) | C | <p>9.76</p> <p><b>TM-align:</b> aliSize=98 (resi) RMSD=3.18 (Å)<br/> SIKVCIADDNRELVSLLDEYISS-Q--P-----DMEVIGTAYNGDCLQMLEEKRPDILLDDI-MPh-LDGL--A-VLErIragfehqpNVIIMLTA-F-----GOEDVTKKAVE-LG<br/> kdilkankrladknrklInkhgVAFDFMGAIGSGKTLITKLLIDnLkdKykiaciagdviaKfdaermekhgakvvpLntgkechldahlvghalednIndeiDLLEFENVGLICPAD--FDLGTGTHKRIVVStEG-ddTIEkHPgIMK-T-----ADLIVInkIdladavgaDIKKMENDAKR</p> <p>--LGSYFIIKPFDMEnlahhirqvvgkt-----<br/> inPDLEVVLLSLKTM-----gfdkvliefieksvkev</p> <p><b>SARST:</b> aliSize=99 (resi) RMSD=7.73 (Å)<br/> sIKVCIADDNRELVSLLDEYISSQPDMEVIGTAYNG--ODCLOMLEEKRPDILLDDIIMPHLDGLAVLERIRAGF--EHPNVIIMLTAfgQEDVTKKAVELGASYFIIKPFDMEnlahhirqvvgkt-----<br/> -kdilkankrladknrklInkhgVAFDFMGAIGSGKTLITKLLIDnLkdKykiaciagdviaKfdaermekhgakvvpLntgkechldahlvghalednIndeiDLLEFENVGLICPADFDLGTGTHKRIVVStEG-ddTIEkHPgIMK-T-----ADLIVInkIdladavgaDIKKMENDAKR</p> <p>-----pfdmEnlahhirqvvgkt<br/> vvlIskImegfdkvliefieksvkev-----</p> <p><b>BLAST:</b> aliSize=9 (resi) iden=4.07% (5/123) simi=7.32% (9/123)<br/> sikvcIADDNRELVSLLDEYISSQPDMEVIGTAYNGDCLQMLEEKRPDILLDDIIMPHLDGLAVLERIRAGF--EHPNVIIMLTAfgQEDVTKKAVELGASYFIIKPFDMEnlahhirqvvgkt-----<br/> --kdilkankrladknrklInkhgVAFDFMGAIGSGKTLITKLLIDnLkdKykiaciagdviaKfdaermekhgakvvpLntgkechldahlvghalednIndeiDLLEFENVGLICPADFDLGTGTHKRIVVStEG-ddTIEkHPgIMK-T-----ADLIVInkIdladavgaDIKKMENDAKR</p> <p>-----lIdeyissqpdmevigtayngqdcLQMLEEKRPDILLDDIIMPHLDGLAVLERIRAGF--EHPNVIIMLTAfgQEDVTKKAVELGASYFIIKPFDMEnlahhirqvvgkt<br/> vvlIskImegfdkvliefieksvkev-----</p> <p><b>Proposed:</b> aliSize=108 (resi) RMSD=2.50 (Å)<br/> kdilkankrladknrklInkhgVAFDFMGAIGSGKTLITKLLIDnLkdKykiaciagdviaKfdaermekhgakvvpLntgkechldahlvghalednIndeiDLLEFENVGLICPADFDLGTGTHKRIVVStEG-ddTIEkHPgIMK-T-----ADLIVInkIdladavgaDIKKMENDAKR</p> <p>IKAVEIGSYFIIKPF--D-MENLAHHIROVYVYKGT--<br/> KRINP-DLEVVLLSLKtmEgFDKVLLEFIEKSVKEV</p>          |
| 214 | 1dz3A (123)<br><br>2hf9B (209) | C | <p>10.57</p> <p><b>TM-align:</b> aliSize=100 (resi) RMSD=3.21 (Å)<br/> SIKVCIIADDNRELVSLLDEYISS-Q--P-----DMEVIGTAYNGDCLQMLEEKRPDILLDDI-MPh-LDGLAVIERIRagfehQPNIIMLTA--F----GOEDVTKKAVE-LG<br/> dilkankrladknrklInkhgVAFDFMGAIGSGKTLITKLLIDnLkdKykiaciagdviaKfdaermekhgakvvpLntgkechldahlvghalednIndeiDLLEFENVGLICPA--DFDLGTGTHKRIVVStEG-ddTIEKH-PGImK-----TADLIVInkIdladavgaDIKKMENDAKRINP</p> <p>-SYFIIKPFDMEnlahhirqvvgkt-----<br/> dLEVVLLSLKTM-----gfdkvliefieksvkev</p> <p><b>SARST:</b> aliSize=69 (resi) RMSD=6.53 (Å)<br/> sikvcIADDNRELVSLLDEYISSQPDMEVIGTAYNGDCLQMLEEKRPDILLDDIIMPHLDGLAVLERIRAGF--EHPNVIIMLTAfgQEDVTKKAVELGASYFIIKPFDMEnlahhirqvvgkt-----<br/> --dilkankrladknrklInkhgVAFDFMGAIGSGKTLITKLLIDnLkdKykiaciagdviaKfdaermekhgakvvpLntgkechldahlvghalednIndeiDLLEFENVGLICPADFDLGTGTHKRIVVStEG-ddTIEKH-PGImK-----TADLIVInkIdladavgaDIKKMENDAKR</p> <p>-----pfdmEnlahhirqvvgkt<br/> inkidladavgaDIKKMENDAKRINPdaevvlIskImegfdkvliefieksvkev-----</p> <p><b>BLAST:</b> aliSize=9 (resi) iden=4.07% (5/123) simi=7.32% (9/123)<br/> sikvcIADDNRELVSLLDEYISSQPDMEVIGTAYNGDCLQMLEEKRPDILLDDIIMPHLDGLAVLERIRAGF--EHPNVIIMLTAfgQEDVTKKAVELGASYFIIKPFDMEnlahhirqvvgkt-----<br/> --dilkankrladknrklInkhgVAFDFMGAIGSGKTLITKLLIDnLkdKykiaciagdviaKfdaermekhgakvvpLntgkechldahlvghalednIndeiDLLEFENVGLICPADFDLGTGTHKRIVVStEG-ddTIEKH-PGImK-----TADLIVInkIdladavgaDIKKMENDAKR</p> <p>-----lIdeyissqpdmevigtayngqdcLQMLEEKRPDILLDDIIMPHLDGLAVLERIRAGF--EHPNVIIMLTAfgQEDVTKKAVELGASYFIIKPFDMEnlahhirqvvgkt<br/> lIskImegfdkvliefieksvkev-----</p> <p><b>Proposed:</b> aliSize=108 (resi) RMSD=2.59 (Å)<br/> dilkankrladknrklInkhgVAFDFMGAIGSGKTLITKLLIDnLkdKykiaciagdviaKfdaermekhgakvvpLntgkechldahlvghalednIndeiDLLEFENVGLICPADFDLGTGTHKRIVVStEG-ddTIEKH-PGImK-----TADLIVInkIdladavgaDIKKMENDAKR</p> <p>L-G-SYFIIKPFDMEnlahhirqvvgkt-----<br/> InPDLEVVLLSLKtmEgFDKVLLEFIEKSVKEV</p> |
| 215 | 1dz3A (123)<br><br>2j48A (119) | C | <p>12.61</p> <p><b>TM-align:</b> aliSize=99 (resi) RMSD=2.81 (Å)<br/> SIKVCIIADDNRELVSLLDEYISSQPDMEVIGTAYNGDCLQMLEEKRPDILLDDI-MPhLdGLAVLERIRAGF-E-EHPNVIIMLTAfgQEDVtKKAVELGASYFIIKPFDMEnlahhirqvvgkt-----<br/> AGHILLEEEDAAATVVCMLTAAG--FKVIWLVDCSTALDQDLLOPVIIMAWPppDQ-S-CULLOHLREHQADpPPLVLFGE--PPVD-PLLTAAQASAILSKP----LD-----pqlllttlqglcppn</p> <p><b>SARST:</b> aliSize=111 (resi) RMSD=8.34 (Å)<br/> si--KVCIIADDNRELVSLLDEYISSQPDMEVIGTAYNGDCLQMLEEKRPDILLDDI-MPhLDGLAVLERIRAGF--EHPNVIIMLTAfgQEDVtKKAVELGASYFIIKPFDMEnlahhirqvvgkt-----kt<br/> --aghILLEEEDAAATVVCMLTAAG--FKVIWLVDCSTALDQDLLOPVIIMAWPppDQ-S-CULLOHLREHQADpPPLVLFGE--PPVD-PLLTAAQASAILSKP----LD-----pqlllttlqglcppn</p> <p><b>BLAST:</b> aliSize=52 (resi) iden=21.01% (25/119) simi=43.70% (52/119)<br/> sik--VCIADDNRELVSLLDEYISSQPDMEVIGTAYNGDCLQMLEEKRPDILLDDIIMPHLDGLAVLERIRAGF--EHPNVIIMLTAfgQEDVtKKAVELGASYFIIKPFDMEnlahhirqvvgkt-----ahhirqvvgkt<br/> ---aghILLEEEDAAATVVCMLTAAG--FKVIWLVDCSTALDQDLLOPVIIMAWPppDQ-S-CULLOHLREHQADpPPLVLFGE--PPVD-PLLTAAQASAILSKP----LD-----pqlllttlqglcppn</p> <p><b>Proposed:</b> aliSize=111 (resi) RMSD=2.40 (Å)<br/> SIKVCIIADDNRELVSLLDEYISSQPDMEVIGTAYNGDCLQMLEEKRPDILLDDI-MPhLdGLAVLERIRAGF-E-EHPNVIIMLTAfgQEDVtKKAVELGASYFIIKPFDMEnlahhirqvvgkt-----<br/> AGHILLEEEDAAATVVCMLTAAG--FKVIWLVDCSTALDQDLLOPVIIMAWPppDQ-S-CULLOHLREHQADpPPLVLFGE--PPVD-PLLTAAQASAILSKP----LD-----pqlllttlqglcppn</p>                                                                                                                                                                                                                                                                                                                                                                                                                                                                     |



|     |                                       |   |       |                                                                                                                                                                                                                                                                                                                                                                                                                                                                                                                                                                                                                                                                                                                                                                                                                                                                                                                                                                                                                                                                                                                                                                                                                                                                                                                                                                                                                                                                                                                                                                                                                                                                                                                                                                                                                                                                                                                                                                                                                                                                                                                                                                                                                                                                                                                                                                                                                    |
|-----|---------------------------------------|---|-------|--------------------------------------------------------------------------------------------------------------------------------------------------------------------------------------------------------------------------------------------------------------------------------------------------------------------------------------------------------------------------------------------------------------------------------------------------------------------------------------------------------------------------------------------------------------------------------------------------------------------------------------------------------------------------------------------------------------------------------------------------------------------------------------------------------------------------------------------------------------------------------------------------------------------------------------------------------------------------------------------------------------------------------------------------------------------------------------------------------------------------------------------------------------------------------------------------------------------------------------------------------------------------------------------------------------------------------------------------------------------------------------------------------------------------------------------------------------------------------------------------------------------------------------------------------------------------------------------------------------------------------------------------------------------------------------------------------------------------------------------------------------------------------------------------------------------------------------------------------------------------------------------------------------------------------------------------------------------------------------------------------------------------------------------------------------------------------------------------------------------------------------------------------------------------------------------------------------------------------------------------------------------------------------------------------------------------------------------------------------------------------------------------------------------|
| 216 | <p>1dz3A (123)</p> <p>3cu5B (129)</p> | C | 22.76 | <p><b>TM-align:</b> aliSize=108 (resi) RMSD=2.43 (Å)<br/> S I K V C I A D D N R E L V S L L D E Y I S S Q P D M E V I G T Y N G Q D C L O M L E E K R P D I L L L I I M P H L D G L A V L E R I R A G F E H Q P N V I M L T A F G Q E D V T K A V E L G A S Y F I L K P F D M E N l a h h i r q v y g k t -----<br/> S L R I L I V D D E K L T R D G I I A N I N W K A L S F D Q I D Q A D D G I N A I Q I A L K H P N V L I T V R M P R M D G I E L V D N I L K L Y P D C S V I F M S G Y S D K E Y L A A I K F R A I R Y V E K P I D P S E I M D A L K Q S I q t v l q h q a q</p> <p><b>SARST:</b> aliSize=112 (resi) RMSD=8.11 (Å)<br/> s - I K V C I A D D N R E L V S L L D E Y I S S Q P D M E V I G T Y N G Q D C L O M L E E K R P D I L L L I I M P H L D G L A V L E R I R A G F E H Q P N V I M L T A F G Q E D V T K A V E L G A S Y F I L K P F D M E N l a h h i r q v y g k t ----- k t<br/> - s L R I L I V D D E K L T R D G I I A N I N W K A L S F D Q I D Q A D D G I N A I Q I A L K H P N V L I T V R M P R M D G I E L V D N I L K L Y P D C S V I F M S G Y S D K E Y L A A I K F R A I R Y V E K P I D P S E I M D A L K Q S I q t v l q h q a q - -</p> <p><b>BLAST:</b> aliSize=62 (resi) iden=22.76% (28/123) simi=50.41% (62/123)<br/> S I K V C I A D D N R E L V S L L D E Y I S S Q P D M E V I G T Y N G Q D C L O M L E E K R P D I L L L I I M P H L D G L A V L E R I R A G F E H Q P N V I M L T A F G Q E D V T K A V E L G A S Y F I L K P F D M E N l a h h i r q v y g k t ----- v y g k t<br/> S L R I L I V D D E K L T R D G I I A N I N W K A L S F D Q I D Q A D D G I N A I Q I A L K H P N V L I T V R M P R M D G I E L V D N I L K L Y P D C S V I F M S G Y S D K E Y L A A I K F R A I R Y V E K P I D P S E I M D A L K Q S I q t v l q h q a q - - - -</p> <p><b>Proposed:</b> aliSize=121 (resi) RMSD=1.98 (Å)<br/> S I K V C I A D D N R E L V S L L D E Y I S S Q P D M E V I G T Y N G Q D C L O M L E E K R P D I L L L I I M P H L D G L A V L E R I R A G F E H Q P N V I M L T A F G Q E D V T K A V E L G A S Y F I L K P F D M E N l a h h i r q v y g k t -----<br/> S L R I L I V D D E K L T R D G I I A N I N W K A L S F D Q I D Q A D D G I N A I Q I A L K H P N V L I T V R M P R M D G I E L V D N I L K L Y P D C S V I F M S G Y S D K E Y L A A I K F R A I R Y V E K P I D P S E I M D A L K Q S I q t v l q h q a q</p>             |
| 217 | <p>1dz3A (123)</p> <p>6chyA (128)</p> | C | 21.14 | <p><b>TM-align:</b> aliSize=108 (resi) RMSD=2.27 (Å)<br/> - - S - I I V C I A D D N R E L V S L L D E Y I S S Q P D M E V I G T Y N G Q D C L O M L E E K R P D I L L L I I M P H L D G L A V L E R I R A G F E H Q P N V I M L T A F G Q E D V T K A V E L G A S Y F I L K P F D M E N l a h h i r q v y g k t -----<br/> a d k e L I F L V D D F S T M R R I V R N L L K E L G - F N N V E E E D V D A L N K I Q A G G Y G F V I S W N P N M D G L E L K T I R A D G A M S A L P L M V I I E A K K E N I I A A Q A G A S G W V V K P F T A A T l e e k l n k i f e k l g m</p> <p><b>SARST:</b> aliSize=103 (resi) RMSD=2.58 (Å)<br/> s - - - - I I V C I A D D N R E L V S L L D E Y I S S Q P D M E V I G T Y N G Q D C L O M L E E K R P D I L L L I I M P H L D G L A V L E R I R A G F E H Q P N V I M L T A F G Q E D V T K A V E L G A S Y F I L K P F D M E N l a h h i r q v y g k t ----- e n l a h h i r q v y g k t<br/> - a d k e L I F L V D D F S T M R R I V R N L L K E L G - L G F N N V E E E D V D A L N K I Q A G G Y G F V I S W N P N M D G L E L K T I R A D G A M S A L P L M V I I E A K K E N I I A A Q A G A S G W V V K P F T A A T l e e k l n k i f e k l g m - - - - -</p> <p><b>BLAST:</b> aliSize=60 (resi) iden=25.20% (31/123) simi=48.78% (60/123)<br/> s - - - - I I V C I A D D N R E L V S L L D E Y I S S Q P D M E V I G T Y N G Q D C L O M L E E K R P D I L L L I I M P H L D G L A V L E R I R A G F E H Q P N V I M L T A F G Q E D V T K A V E L G A S Y F I L K P F D M E N l a h h i r q v y g k t ----- t<br/> - a d k e L I F L V D D F S T M R R I V R N L L K E L G - L G F N N V E E E D V D A L N K I Q A G G Y G F V I S W N P N M D G L E L K T I R A D G A M S A L P L M V I I E A K K E N I I A A Q A G A S G W V V K P F T A A T l e e k l n k i f e k l g m -</p> <p><b>Proposed:</b> aliSize=120 (resi) RMSD=1.74 (Å)<br/> - - S - I I V C I A D D N R E L V S L L D E Y I S S Q P D M E V I G T Y N G Q D C L O M L E E K R P D I L L L I I M P H L D G L A V L E R I R A G F E H Q P N V I M L T A F G Q E D V T K A V E L G A S Y F I L K P F D M E N l a h h i r q v y g k t -----<br/> a d k e L I F L V D D F S T M R R I V R N L L K E L G - F N N V E E E D V D A L N K I Q A G G Y G F V I S W N P N M D G L E L K T I R A D G A M S A L P L M V I I E A K K E N I I A A Q A G A S G W V V K P F T A A T l e e k l n k i f e k l g m</p> |
| 218 | <p>1f0vA (124)</p> <p>1a5pA (124)</p> | C | 98.39 | <p><b>TM-align:</b> aliSize=115 (resi) RMSD=1.31 (Å)<br/> K E T A A A K F E R Q H M D S S T S A A S S S N Y C N Q M M K S R N L T K D R C K P V N T F V H E S L A D V Q A V C S Q K N V A C K N G O T N C Y O S Y S T M S I T D C R E T G S S K Y P N A A Y K T T Q A N K H I I V A C E G N P Y P V P V H F D A S V -----<br/> K E T A A A K F E R Q H M D S S T S A A S S S N Y C N Q M M K S R N L T K D R A K P V N T F V H E S L A D V Q A V C S Q K N V A C K N G O T N C Y O S Y S T M S I T D C R E T G S S K Y P N A A Y K T T Q A N K H I I V A C E G N P Y P V P V H F D A S V -----</p> <p><b>SARST:</b> aliSize=122 (resi) RMSD=8.84 (Å)<br/> k - E T A A A K F E R Q H M D S S T S A A S S S N Y C N Q M M K S R N L T K D R C K P V N T F V H E S L A D V Q A V C S Q K N V A C K N G O T N C Y O S Y S T M S I T D C R E T G S S K Y P N A A Y K T T Q A N K H I I V A C E G N P Y P V P V H F D A S V ----- v<br/> - k E T A A A K F E R Q H M D S S T S A A S S S N Y C N Q M M K S R N L T K D R A K P V N T F V H E S L A D V Q A V C S Q K N V A C K N G O T N C Y O S Y S T M S I T D C R E T G S S K Y P N A A Y K T T Q A N K H I I V A C E G N P Y P V P V H F D A S V -----</p> <p><b>BLAST:</b> aliSize=122 (resi) iden=98.39% (122/124) simi=98.39% (122/124)<br/> K E T A A A K F E R Q H M D S S T S A A S S S N Y C N Q M M K S R N L T K D R C K P V N T F V H E S L A D V Q A V C S Q K N V A C K N G O T N C Y O S Y S T M S I T D C R E T G S S K Y P N A A Y K T T Q A N K H I I V A C E G N P Y P V P V H F D A S V<br/> K E T A A A K F E R Q H M D S S T S A A S S S N Y C N Q M M K S R N L T K D R A K P V N T F V H E S L A D V Q A V C S Q K N V A C K N G O T N C Y O S Y S T M S I T D C R E T G S S K Y P N A A Y K T T Q A N K H I I V A C E G N P Y P V P V H F D A S V</p> <p><b>Proposed:</b> aliSize=124 (resi) RMSD=0.52 (Å)<br/> K E T A A A K F E R Q H M D S S T S A A S S S N Y C N Q M M K S R N L T K D R C K P V N T F V H E S L A D V Q A V C S Q K N V A C K N G O T N C Y O S Y S T M S I T D C R E T G S S K Y P N A A Y K T T Q A N K H I I V A C E G N P Y P V P V H F D A S V<br/> K E T A A A K F E R Q H M D S S T S A A S S S N Y C N Q M M K S R N L T K D R A K P V N T F V H E S L A D V Q A V C S Q K N V A C K N G O T N C Y O S Y S T M S I T D C R E T G S S K Y P N A A Y K T T Q A N K H I I V A C E G N P Y P V P V H F D A S V</p>  |

|     |                                                     |   |       |                                                                                                                                                                                                                                                                                                                                                                                                                                                                                                                                                                                                                                                                                                                                                                                                                                                                                                                                                                                                                                                                                                                                                                                                                                                                                                                                                                                                                           |
|-----|-----------------------------------------------------|---|-------|---------------------------------------------------------------------------------------------------------------------------------------------------------------------------------------------------------------------------------------------------------------------------------------------------------------------------------------------------------------------------------------------------------------------------------------------------------------------------------------------------------------------------------------------------------------------------------------------------------------------------------------------------------------------------------------------------------------------------------------------------------------------------------------------------------------------------------------------------------------------------------------------------------------------------------------------------------------------------------------------------------------------------------------------------------------------------------------------------------------------------------------------------------------------------------------------------------------------------------------------------------------------------------------------------------------------------------------------------------------------------------------------------------------------------|
| 219 | <p>1f0vA<br/>(124)</p> <hr/> <p>1a5qA<br/>(124)</p> | C | 99.19 | <p><b>TM-align:</b> aliSize=115 (resi) RMSD=1.26 (Å)<br/> KETAAAKFEROHMDSSTSAASSSNYCNOQMMKSRNLTKDRCKPVNTFVHESLADVOAVCSQKNVACKNGOTNCYQSYSTMSITDCRETGSSKYPNCAYKTTQANKHIIVACEGNPYvpvhfdasv-----<br/> KETAAAKFEROHMDSSTSAASSSNYCNOQMMKSRNLTKDRCKPVNTFVHESLADVOAVCSQKNVACKNGOTNCYQSYSTMSITDCRETGSSKYPNCAYKTTQANKHIIVACEGNPY-----vpvhfdasv</p> <p><b>SARST:</b> aliSize=122 (resi) RMSD=8.77 (Å)<br/> k-ETAAAKFEROHMDSSTSAASSSNYCNOQMMKSRNLTKDRCKPVNTFVHESLADVOAVCSQKNVACKNGOTNCYQSYSTMSITDCRETGSSKYPNCAYKTTQANKHIIVACEGNPYVPVHFDA--v<br/> -kETAAAKFEROHMDSSTSAASSSNYCNOQMMKSRNLTKDRCKPVNTFVHESLADVOAVCSQKNVACKNGOTNCYQSYSTMSITDCRETGSSKYPNCAYKTTQANKHIIVACEGNPYVPVHFDA--v</p> <p><b>BLAST:</b> aliSize=123 (resi) iden=99.19% (123/124) simi=99.19% (123/124)<br/> KETAAAKFEROHMDSSTSAASSSNYCNOQMMKSRNLTKDRCKPVNTFVHESLADVOAVCSQKNVACKNGOTNCYQSYSTMSITDCRETGSSKYPNCAYKTTQANKHIIVACEGNPYVPVHFDA--v<br/> KETAAAKFEROHMDSSTSAASSSNYCNOQMMKSRNLTKDRCKPVNTFVHESLADVOAVCSQKNVACKNGOTNCYQSYSTMSITDCRETGSSKYPNCAYKTTQANKHIIVACEGNPYVPVHFDA--v</p> <p><b>Proposed:</b> aliSize=124 (resi) RMSD=0.45 (Å)<br/> KETAAAKFEROHMDSSTSAASSSNYCNOQMMKSRNLTKDRCKPVNTFVHESLADVOAVCSQKNVACKNGOTNCYQSYSTMSITDCRETGSSKYPNCAYKTTQANKHIIVACEGNPYVPVHFDA--v<br/> KETAAAKFEROHMDSSTSAASSSNYCNOQMMKSRNLTKDRCKPVNTFVHESLADVOAVCSQKNVACKNGOTNCYQSYSTMSITDCRETGSSKYPNCAYKTTQANKHIIVACEGNPYVPVHFDA--v</p>                                                     |
| 220 | <p>1f0vA<br/>(124)</p> <hr/> <p>1awzA<br/>(123)</p> | C | 27.64 | <p><b>TM-align:</b> aliSize=105 (resi) RMSD=1.97 (Å)<br/> KE-TAAAKFEROHMDSSTSAASSSNYCNOQMMKSRNLTKDRCKPVNTFVHESLADVOAVCS---QKNVackngqTNCYQSYSTMSITDCRETGSSKYPNCAYKTTQANKHIIVACEGNpyvpvhfdasv-----<br/> QdnSRYTHELTOHYDA-K-POGRDDRYCESIMRRRGLTS-PCKDINTFTHGNKRSIKAIENknGNPHR-----ENLRISKSSFOVITKLGSPWPQQRATAGFRNVVACENG-----lpvhldqsi frfp</p> <p><b>SARST:</b> aliSize=92 (resi) RMSD=10.72 (Å)<br/> ket----AAAKFEROHMDSSTSAASSSNYCNOQMMKSRNLTKDRCKPVNTFVHESLADVOAVCSQKN---VAC-----KNGOT-----NCYQSYSTMSITDCRETGSSKYPNCAYKTTQANKHIIVACEGNPYVPVHF-----dasv<br/> ---qdnsRYTHELTOHYDAKPOGR-DDRYCESIMRRRGL-----TSPCKDINTFTHGNKRSIKAIENknGNPHRENLRISKSSFOVITKLGSPWPQQRATAGFRNVVACENG--ENGLPVHLDqsi frfp----</p> <p><b>BLAST:</b> aliSize=61 (resi) iden=32.52% (40/123) simi=49.59% (61/123)<br/> ketaaak-----FEROHMDSSTSAASSSNYCNOQMMKSRNLTKDRCKPVNTFVHESLADVOAVCSQKNVackngqTNCYQSYSTMSITDCRETGSSKYPNCAYKTTQANKHIIVACEGNpyVPVHFDA--v-----<br/> -----qdnsrythELTOHYDAKPOGRDD-RYCESIMRRRGLTSP-CKDINTFTHGNKRSIKAIENknGN---NPHRENLRISKSSFOVITKLGSPWPQQRATAGFRNVVACENG--LPVHLDQSi frfp</p> <p><b>Proposed:</b> aliSize=115 (resi) RMSD=1.75 (Å)<br/> KE-TAAAKFEROHMDSST-saASSSNYCNOQMMKSRNLTKDRCKPVNTFVHESLADVOAVCS---QKNVackngqTNCYQSYSTMSITDCRETGSSKYPNCAYKTTQANKHIIVACEGNPYVPVHFDA--ASV<br/> -QdnSRYTHELTOHYDAKPOGR--GRDDRYCESIMRRRGLTSP-CKDINTFTHGNKRSIKAIENknGNPHR-----ENLRISKSSFOVITKLGSPWPQQRATAGFRNVVACENGLPVHLDQSi frfp</p> |
| 221 | <p>1f0vA<br/>(124)</p> <hr/> <p>1b6vA<br/>(124)</p> | C | 94.35 | <p><b>TM-align:</b> aliSize=115 (resi) RMSD=1.29 (Å)<br/> KETAAAKFEROHMDSSTSAASSSNYCNOQMMKSRNLTKDRCKPVNTFVHESLADVOAVCSQKNVACKNGOTNCYQSYSTMSITDCRETGSSKYPNCAYKTTQANKHIIVACEGNPYvpvhfdasv-----<br/> KETAAAKFEROHMDSSTSAASSSNYCNOQMMKSRNLTKDRCKPVNTFVHESLADVKAVCSQKKVTCKNGOTNCYQSKSTMRIIDCRETGSSKYPNCAYKTTQANKHIIVACEGKPY-----vpvhfdasv</p> <p><b>SARST:</b> aliSize=122 (resi) RMSD=8.77 (Å)<br/> k-ETAAAKFEROHMDSSTSAASSSNYCNOQMMKSRNLTKDRCKPVNTFVHESLADVOAVCSQKNVACKNGOTNCYQSYSTMSITDCRETGSSKYPNCAYKTTQANKHIIVACEGNPYVPVHFDA--v<br/> -kETAAAKFEROHMDSSTSAASSSNYCNOQMMKSRNLTKDRCKPVNTFVHESLADVKAVCSQKKVTCKNGOTNCYQSKSTMRIIDCRETGSSKYPNCAYKTTQANKHIIVACEGKPYVPVHFDA--v</p> <p><b>BLAST:</b> aliSize=118 (resi) iden=94.35% (117/124) simi=95.16% (118/124)<br/> KETAAAKFEROHMDSSTSAASSSNYCNOQMMKSRNLTKDRCKPVNTFVHESLADVOAVCSQKNVACKNGOTNCYQSYSTMSITDCRETGSSKYPNCAYKTTQANKHIIVACEGNPYVPVHFDA--v<br/> KETAAAKFEROHMDSSTSAASSSNYCNOQMMKSRNLTKDRCKPVNTFVHESLADVKAVCSQKKVTCKNGOTNCYQSKSTMRIIDCRETGSSKYPNCAYKTTQANKHIIVACEGKPYVPVHFDA--v</p> <p><b>Proposed:</b> aliSize=124 (resi) RMSD=0.56 (Å)<br/> KETAAAKFEROHMDSSTSAASSSNYCNOQMMKSRNLTKDRCKPVNTFVHESLADVOAVCSQKNVACKNGOTNCYQSYSTMSITDCRETGSSKYPNCAYKTTQANKHIIVACEGNPYVPVHFDA--v<br/> KETAAAKFEROHMDSSTSAASSSNYCNOQMMKSRNLTKDRCKPVNTFVHESLADVKAVCSQKKVTCKNGOTNCYQSKSTMRIIDCRETGSSKYPNCAYKTTQANKHIIVACEGKPYVPVHFDA--v</p>                                                     |

|     |                |   |       |                                                                                                                                                                                                                                                                                                                                                                                                                                                                                                                                                                                                                                                                                                                                                                                                                                                                                                                                                                                                                                                                                                                                                                                                                                                                                                                |
|-----|----------------|---|-------|----------------------------------------------------------------------------------------------------------------------------------------------------------------------------------------------------------------------------------------------------------------------------------------------------------------------------------------------------------------------------------------------------------------------------------------------------------------------------------------------------------------------------------------------------------------------------------------------------------------------------------------------------------------------------------------------------------------------------------------------------------------------------------------------------------------------------------------------------------------------------------------------------------------------------------------------------------------------------------------------------------------------------------------------------------------------------------------------------------------------------------------------------------------------------------------------------------------------------------------------------------------------------------------------------------------|
| 222 | 1f0vA<br>(124) | C | 99.19 | <p>TM-align: aliSize=115 (resi) RMSD=1.38 (Å)<br/>KETAAAKFERQHMDSSSTAASSSNYNQMMKSRNLTKDRCKPVNTFVHESLADVOAVCSQKNVACKNGOTNCYOSYSTMSITDCRETGSSKYPNCAYKTTQANKHIIVACEGNPYvpvhfdasv-----<br/>KETAAAKFERQHMDSSSTAASSSNYNQMMKSRNLTKDRCKPVNTFVHESLADVOAVCSQKNVACKNGOTNCYOSYSTMSITDCRETGSSKYPNCAYKTTQANKHIIVACEGNPY-----vpvhfdasv</p> <p>SARST: aliSize=122 (resi) RMSD=8.84 (Å)<br/>k-ETAAAKFERQHMDSSSTAASSSNYNQMMKSRNLTKDRCKPVNTFVHESLADVOAVCSQKNVACKNGOTNCYOSYSTMSITDCRETGSSKYPNCAYKTTQANKHIIVACEGNPYVPVHFDAS-v<br/>-kETAAAKFERQHMDSSSTAASSSNYNQMMKSRNLTKDRCKPVNTFVHESLADVOAVCSQKNVACKNGOTNCYOSYSTMSITDCRETGSSKYPNCAYKTTQANKHIIVACEGNPYVPVHFDASv-</p> <p>BLAST: aliSize=123 (resi) iden=99.19% (123/124) simi=99.19% (123/124)<br/>KETAAAKFERQHMDSSSTAASSSNYNQMMKSRNLTKDRCKPVNTFVHESLADVOAVCSQKNVACKNGOTNCYOSYSTMSITDCRETGSSKYPNCAYKTTQANKHIIVACEGNPYVPVHFDASV<br/>KETAAAKFERQHMDSSSTAASSSNYNQMMKSRNLTKDRCKPVNTFVHESLADVOAVCSQKNVACKNGOTNCYOSYSTMSITDCRETGSSKYPNCAYKTTQANKHIIVACEGNPYVPVHFDASV</p> <p>Proposed: aliSize=124 (resi) RMSD=0.66 (Å)<br/>KETAAAKFERQHMDSSSTAASSSNYNQMMKSRNLTKDRCKPVNTFVHESLADVOAVCSQKNVACKNGOTNCYOSYSTMSITDCRETGSSKYPNCAYKTTQANKHIIVACEGNPYVPVHFDASV<br/>KETAAAKFERQHMDSSSTAASSSNYNQMMKSRNLTKDRCKPVNTFVHESLADVOAVCSQKNVACKNGOTNCYOSYSTMSITDCRETGSSKYPNCAYKTTQANKHIIVACEGNPYVPVHFDASV</p>  |
|     | 1c8wA<br>(124) |   |       | <p>TM-align: aliSize=114 (resi) RMSD=0.97 (Å)<br/>KETAAAKFERQHMDSSSTAASSSNYNQMMKSRNLTKDRCKPVNTFVHESLADVOAVCSQKNVACKNGOTNCYOSYSTMSITDCRETGSSKYPNCAYKTTQANKHIIVACEGNPYvpvhfdasv-----<br/>KETAAAKFERQHMDSSSTAASSSNYNQMMKSRNLTKDRCKPVNTFVHESLADVOAVCSQKNVACKNGOTNCYOSYSTMSITDCRETGSSKYPNCAYKTTQANKHIIVACEGNPY-----yvpvhfdasv</p> <p>SARST: aliSize=122 (resi) RMSD=8.85 (Å)<br/>k-ETAAAKFERQHMDSSSTAASSSNYNQMMKSRNLTKDRCKPVNTFVHESLADVOAVCSQKNVACKNGOTNCYOSYSTMSITDCRETGSSKYPNCAYKTTQANKHIIVACEGNPYVPVHFDAS-v<br/>-kETAAAKFERQHMDSSSTAASSSNYNQMMKSRNLTKDRCKPVNTFVHESLADVOAVCSQKNVACKNGOTNCYOSYSTMSITDCRETGSSKYPNCAYKTTQANKHIIVACEGNPYVPVHFDASv-</p> <p>BLAST: aliSize=123 (resi) iden=99.19% (123/124) simi=99.19% (123/124)<br/>KETAAAKFERQHMDSSSTAASSSNYNQMMKSRNLTKDRCKPVNTFVHESLADVOAVCSQKNVACKNGOTNCYOSYSTMSITDCRETGSSKYPNCAYKTTQANKHIIVACEGNPYVPVHFDASV<br/>KETAAAKFERQHMDSSSTAASSSNYNQMMKSRNLTKDRCKPVNTFVHESLADVOAVCSQKNVACKNGOTNCYOSYSTMSITDCRETGSSKYPNCAYKTTQANKHIIVACEGNPYVPVHFDASV</p> <p>Proposed: aliSize=124 (resi) RMSD=0.56 (Å)<br/>KETAAAKFERQHMDSSSTAASSSNYNQMMKSRNLTKDRCKPVNTFVHESLADVOAVCSQKNVACKNGOTNCYOSYSTMSITDCRETGSSKYPNCAYKTTQANKHIIVACEGNPYVPVHFDASV<br/>KETAAAKFERQHMDSSSTAASSSNYNQMMKSRNLTKDRCKPVNTFVHESLADVOAVCSQKNVACKNGOTNCYOSYSTMSITDCRETGSSKYPNCAYKTTQANKHIIVACEGNPYVPVHFDASV</p> |
| 224 | 1f0vA<br>(124) | C | 99.19 | <p>TM-align: aliSize=115 (resi) RMSD=1.30 (Å)<br/>KETAAAKFERQHMDSSSTAASSSNYNQMMKSRNLTKDRCKPVNTFVHESLADVOAVCSQKNVACKNGOTNCYOSYSTMSITDCRETGSSKYPNCAYKTTQANKHIIVACEGNPYvpvhfdasv-----<br/>KETAAAKFERQHMDSSSTAASSSNYNQMMKSRNLTKDRCKPVNTFVHESLADVOAVCSQKNVACKNGOTNCYOSYSTMSITDCRETGSSKYPNCAYKTTQANKHIIVACEGNPY-----vpvafdasv</p> <p>SARST: aliSize=122 (resi) RMSD=8.84 (Å)<br/>k-ETAAAKFERQHMDSSSTAASSSNYNQMMKSRNLTKDRCKPVNTFVHESLADVOAVCSQKNVACKNGOTNCYOSYSTMSITDCRETGSSKYPNCAYKTTQANKHIIVACEGNPYVPVHFDAS-v<br/>-kETAAAKFERQHMDSSSTAASSSNYNQMMKSRNLTKDRCKPVNTFVHESLADVOAVCSQKNVACKNGOTNCYOSYSTMSITDCRETGSSKYPNCAYKTTQANKHIIVACEGNPYVPVAFDASv-</p> <p>BLAST: aliSize=123 (resi) iden=99.19% (123/124) simi=99.19% (123/124)<br/>KETAAAKFERQHMDSSSTAASSSNYNQMMKSRNLTKDRCKPVNTFVHESLADVOAVCSQKNVACKNGOTNCYOSYSTMSITDCRETGSSKYPNCAYKTTQANKHIIVACEGNPYVPVHFDASV<br/>KETAAAKFERQHMDSSSTAASSSNYNQMMKSRNLTKDRCKPVNTFVHESLADVOAVCSQKNVACKNGOTNCYOSYSTMSITDCRETGSSKYPNCAYKTTQANKHIIVACEGNPYVPVAFDASV</p> <p>Proposed: aliSize=124 (resi) RMSD=0.48 (Å)<br/>KETAAAKFERQHMDSSSTAASSSNYNQMMKSRNLTKDRCKPVNTFVHESLADVOAVCSQKNVACKNGOTNCYOSYSTMSITDCRETGSSKYPNCAYKTTQANKHIIVACEGNPYVPVHFDASV<br/>KETAAAKFERQHMDSSSTAASSSNYNQMMKSRNLTKDRCKPVNTFVHESLADVOAVCSQKNVACKNGOTNCYOSYSTMSITDCRETGSSKYPNCAYKTTQANKHIIVACEGNPYVPVAFDASV</p>  |
|     | 1c9xA<br>(124) |   |       |                                                                                                                                                                                                                                                                                                                                                                                                                                                                                                                                                                                                                                                                                                                                                                                                                                                                                                                                                                                                                                                                                                                                                                                                                                                                                                                |

|     |                                               |   |       |                                                                                                                                                                                                                                                                                                                                                                                                                                                                                                                                                                                                                                                                                                                                                                                                                                                                                                                                                                                                                                                                                                                                                                                                                                                                                                                                                                                       |
|-----|-----------------------------------------------|---|-------|---------------------------------------------------------------------------------------------------------------------------------------------------------------------------------------------------------------------------------------------------------------------------------------------------------------------------------------------------------------------------------------------------------------------------------------------------------------------------------------------------------------------------------------------------------------------------------------------------------------------------------------------------------------------------------------------------------------------------------------------------------------------------------------------------------------------------------------------------------------------------------------------------------------------------------------------------------------------------------------------------------------------------------------------------------------------------------------------------------------------------------------------------------------------------------------------------------------------------------------------------------------------------------------------------------------------------------------------------------------------------------------|
| 225 | <p>1f0vA<br/>(124)</p> <p>1e21A<br/>(119)</p> | C | 68.91 | <p><b>TM-align:</b> aliSize=108 (resi) RMSD=1.77 (Å)<br/> ketaaakFEROHMDSSTsAAStSSNYCNQMMKSRNLTKDRCKPVNTFVHESLADVOAVCSQKNVACKNGQTNCYQSYSTMSITDCRETGSSKYPNCAYKTTQANKHIIVACEGNPYvpvhfdasv-----<br/> -----AFROHMDSDS-SPSSsSYCNQMMRRRNMIOGRCKPVNTFVHEPLVDVQNVCFEKTCKNGGNCYKSNLSMHI TDCRLINGSRYPNCAYRTSPKERHIIVACEGSPY-----vpvhfdasve</p> <p><b>SARST:</b> aliSize=116 (resi) RMSD=9.09 (Å)<br/> ketaaakFEROHMDSSTsAAStSSNYCNQMMKSRNLTKDRCKPVNTFVHESLADVOAVCSQKNVACKNGQTNCYQSYSTMSITDCRETGSSKYPNCAYKTTQANKHIIVACEGNPYVPVHFDASe--v<br/> -----AFROHMDSDS-SPSSsSYCNQMMRRRNMIOGRCKPVNTFVHEPLVDVQNVCFEKTCKNGGNCYKSNLSMHI TDCRLINGSRYPNCAYRTSPKERHIIVACEGSPYVPVHFDASe--ve-</p> <p><b>BLAST:</b> aliSize=97 (resi) iden=69.75% (83/119) simi=81.51% (97/119)<br/> ketaaakFEROHMDSSTsAAStSSNYCNQMMKSRNLTKDRCKPVNTFVHESLADVOAVCSQKNVACKNGQTNCYQSYSTMSITDCRETGSSKYPNCAYKTTQANKHIIVACEGNPYVPVHFDASe--v<br/> -----AFROHMDSDS-SPSSsSYCNQMMRRRNMIOGRCKPVNTFVHEPLVDVQNVCFEKTCKNGGNCYKSNLSMHI TDCRLINGSRYPNCAYRTSPKERHIIVACEGSPYVPVHFDASe--ve</p> <p><b>Proposed:</b> aliSize=117 (resi) RMSD=1.21 (Å)<br/> ketaaakFEROHMDSSTsAAStSSNYCNQMMKSRNLTKDRCKPVNTFVHESLADVOAVCSQKNVACKNGQTNCYQSYSTMSITDCRETGSSKYPNCAYKTTQANKHIIVACEGNPYVPVHFDASe--v<br/> -----AFROHMDSDS-SPSSsSYCNQMMRRRNMIOGRCKPVNTFVHEPLVDVQNVCFEKTCKNGGNCYKSNLSMHI TDCRLINGSRYPNCAYRTSPKERHIIVACEGSPYVPVHFDASe--ve</p>                         |
| 226 | <p>1f0vA<br/>(124)</p> <p>1eicA<br/>(124)</p> | C | 99.19 | <p><b>TM-align:</b> aliSize=115 (resi) RMSD=1.32 (Å)<br/> KETAaAKFEROHMDSSTsAAStSSNYCNQMMKSRNLTKDRCKPVNTFVHESLADVOAVCSQKNVACKNGQTNCYQSYSTMSITDCRETGSSKYPNCAYKTTQANKHIIVACEGNPYvpvhfdasv-----<br/> KETAaAKFEROHMDSSTsAAStSSNYCNQMMKSRNLTKDRCKPVNTFVHESLADVOAVCSQKNVACKNGQTNCYQSYSTMSITDCRETGSSKYPNCAYKTTQANKHIIVACEGNPY-----vpvhadasv</p> <p><b>SARST:</b> aliSize=122 (resi) RMSD=8.81 (Å)<br/> k-ETAAAKFEROHMDSSTsAAStSSNYCNQMMKSRNLTKDRCKPVNTFVHESLADVOAVCSQKNVACKNGQTNCYQSYSTMSITDCRETGSSKYPNCAYKTTQANKHIIVACEGNPYVPVHFDASe--v<br/> -k-ETAAAKFEROHMDSSTsAAStSSNYCNQMMKSRNLTKDRCKPVNTFVHESLADVOAVCSQKNVACKNGQTNCYQSYSTMSITDCRETGSSKYPNCAYKTTQANKHIIVACEGNPYVPVHFDASe--v-</p> <p><b>BLAST:</b> aliSize=123 (resi) iden=99.19% (123/124) simi=99.19% (123/124)<br/> KETAaAKFEROHMDSSTsAAStSSNYCNQMMKSRNLTKDRCKPVNTFVHESLADVOAVCSQKNVACKNGQTNCYQSYSTMSITDCRETGSSKYPNCAYKTTQANKHIIVACEGNPYVPVHFDASe--v<br/> KETAaAKFEROHMDSSTsAAStSSNYCNQMMKSRNLTKDRCKPVNTFVHESLADVOAVCSQKNVACKNGQTNCYQSYSTMSITDCRETGSSKYPNCAYKTTQANKHIIVACEGNPYVPVHFDASe--v-</p> <p><b>Proposed:</b> aliSize=124 (resi) RMSD=0.56 (Å)<br/> KETAaAKFEROHMDSSTsAAStSSNYCNQMMKSRNLTKDRCKPVNTFVHESLADVOAVCSQKNVACKNGQTNCYQSYSTMSITDCRETGSSKYPNCAYKTTQANKHIIVACEGNPYVPVHFDASe--v<br/> KETAaAKFEROHMDSSTsAAStSSNYCNQMMKSRNLTKDRCKPVNTFVHESLADVOAVCSQKNVACKNGQTNCYQSYSTMSITDCRETGSSKYPNCAYKTTQANKHIIVACEGNPYVPVHFDASe--v-</p> |
| 227 | <p>1f0vA<br/>(124)</p> <p>1eidA<br/>(124)</p> | C | 99.19 | <p><b>TM-align:</b> aliSize=115 (resi) RMSD=1.33 (Å)<br/> KETAaAKFEROHMDSSTsAAStSSNYCNQMMKSRNLTKDRCKPVNTFVHESLADVOAVCSQKNVACKNGQTNCYQSYSTMSITDCRETGSSKYPNCAYKTTQANKHIIVACEGNPYvpvhfdasv-----<br/> KETAaAKFEROHMDSSTsAAStSSNYCNQMMKSRNLTKDRCKPVNTFVHESLADVOAVCSQKNVACKNGQTNCYQSYSTMSITDCRETGSSKYPNCAYKTTQANKHIIVACEGNPY-----vpvhgdasv</p> <p><b>SARST:</b> aliSize=119 (resi) RMSD=5.65 (Å)<br/> k-ETAAAKFEROHMDSSTsAAStSSNYCNQMMKSRNLTKDRCKPVNTFVHESLADVOAVCSQKNVACKNGQTNCYQSYSTMSITDCRETGSSKYPNCAYKTTQANKHIIVACEGNPYVPVHFDASe--v<br/> -k-ETAAAKFEROHMDSSTsAAStSSNYCNQMMKSRNLTKDRCKPVNTFVHESLADVOAVCSQKNVACKNGQTNCYQSYSTMSITDCRETGSSKYPNCAYKTTQANKHIIVACEGNPYVPVHFDASe--v-</p> <p><b>BLAST:</b> aliSize=123 (resi) iden=99.19% (123/124) simi=99.19% (123/124)<br/> KETAaAKFEROHMDSSTsAAStSSNYCNQMMKSRNLTKDRCKPVNTFVHESLADVOAVCSQKNVACKNGQTNCYQSYSTMSITDCRETGSSKYPNCAYKTTQANKHIIVACEGNPYVPVHFDASe--v<br/> KETAaAKFEROHMDSSTsAAStSSNYCNQMMKSRNLTKDRCKPVNTFVHESLADVOAVCSQKNVACKNGQTNCYQSYSTMSITDCRETGSSKYPNCAYKTTQANKHIIVACEGNPYVPVHFDASe--v-</p> <p><b>Proposed:</b> aliSize=124 (resi) RMSD=0.61 (Å)<br/> KETAaAKFEROHMDSSTsAAStSSNYCNQMMKSRNLTKDRCKPVNTFVHESLADVOAVCSQKNVACKNGQTNCYQSYSTMSITDCRETGSSKYPNCAYKTTQANKHIIVACEGNPYVPVHFDASe--v<br/> KETAaAKFEROHMDSSTsAAStSSNYCNQMMKSRNLTKDRCKPVNTFVHESLADVOAVCSQKNVACKNGQTNCYQSYSTMSITDCRETGSSKYPNCAYKTTQANKHIIVACEGNPYVPVHFDASe--v-</p> |

|     |                                                     |   |       |                                                                                                                                                                                                                                                                                                                                                                                                                                                                                                                                                                                                                                                                                                                                                                                                                                                                                                                                                                                                                                                                                                                                                                                                                                                                                                                                                                                                                                                                                                                                                                                                                                                                                                                                                                                                                                                                                                                                                                                                                                                                                                                                                                                                                                                                                                                                                                                                                                                                                                                                                                                                                                                                                                                                    |
|-----|-----------------------------------------------------|---|-------|------------------------------------------------------------------------------------------------------------------------------------------------------------------------------------------------------------------------------------------------------------------------------------------------------------------------------------------------------------------------------------------------------------------------------------------------------------------------------------------------------------------------------------------------------------------------------------------------------------------------------------------------------------------------------------------------------------------------------------------------------------------------------------------------------------------------------------------------------------------------------------------------------------------------------------------------------------------------------------------------------------------------------------------------------------------------------------------------------------------------------------------------------------------------------------------------------------------------------------------------------------------------------------------------------------------------------------------------------------------------------------------------------------------------------------------------------------------------------------------------------------------------------------------------------------------------------------------------------------------------------------------------------------------------------------------------------------------------------------------------------------------------------------------------------------------------------------------------------------------------------------------------------------------------------------------------------------------------------------------------------------------------------------------------------------------------------------------------------------------------------------------------------------------------------------------------------------------------------------------------------------------------------------------------------------------------------------------------------------------------------------------------------------------------------------------------------------------------------------------------------------------------------------------------------------------------------------------------------------------------------------------------------------------------------------------------------------------------------------|
| 228 | <p>1f0vA<br/>(124)</p> <hr/> <p>1eieA<br/>(124)</p> | C | 99.19 | <p><b>TM-align:</b> aliSize=115 (resi) RMSD=1.33 (Å)<br/> KETA<del>AAK</del>FEROH<del>MD</del>SSTSA<del>AS</del>SSNYC<del>NQ</del>MMKSR<del>NL</del>TK<del>DR</del>CKP<del>VNT</del>FVHESLAD<del>VQ</del>AVCS<del>QK</del>NVACK<del>NG</del>OTNCY<del>Q</del>SYSTMSIT<del>DC</del>RET<del>G</del>SSKYPNCA<del>YK</del>TTQANKHIIVACE<del>GN</del>Pyvpvhfdasv-----<br/> KETA<del>AAK</del>FEROH<del>MD</del>SSTSA<del>AS</del>SSNYC<del>NQ</del>MMKSR<del>NL</del>TK<del>DR</del>CKP<del>VNT</del>FVHESLAD<del>VQ</del>AVCS<del>QK</del>NVACK<del>NG</del>OTNCY<del>Q</del>SYSTMSIT<del>DC</del>RET<del>G</del>SSKYPNCA<del>YK</del>TTQANKHIIVACE<del>GN</del>Py-----vpvhwDasv</p> <p><b>SARST:</b> aliSize=122 (resi) RMSD=8.81 (Å)<br/> k-<del>E</del>TAAAKFEROH<del>MD</del>SSTSA<del>AS</del>SSNYC<del>NQ</del>MMKSR<del>NL</del>TK<del>DR</del>CKP<del>VNT</del>FVHESLAD<del>VQ</del>AVCS<del>QK</del>NVACK<del>NG</del>OTNCY<del>Q</del>SYSTMSIT<del>DC</del>RET<del>G</del>SSKYPNCA<del>YK</del>TTQANKHIIVACE<del>GN</del>PyVPVHFDAS-v<br/> -k<del>E</del>TAAAKFEROH<del>MD</del>SSTSA<del>AS</del>SSNYC<del>NQ</del>MMKSR<del>NL</del>TK<del>DR</del>CKP<del>VNT</del>FVHESLAD<del>VQ</del>AVCS<del>QK</del>NVACK<del>NG</del>OTNCY<del>Q</del>SYSTMSIT<del>DC</del>RET<del>G</del>SSKYPNCA<del>YK</del>TTQANKHIIVACE<del>GN</del>PyVPVHWDASv-</p> <p><b>BLAST:</b> aliSize=124 (resi) iden=99.19% (123/124) simi=100.00% (124/124)<br/> KETA<del>AAK</del>FEROH<del>MD</del>SSTSA<del>AS</del>SSNYC<del>NQ</del>MMKSR<del>NL</del>TK<del>DR</del>CKP<del>VNT</del>FVHESLAD<del>VQ</del>AVCS<del>QK</del>NVACK<del>NG</del>OTNCY<del>Q</del>SYSTMSIT<del>DC</del>RET<del>G</del>SSKYPNCA<del>YK</del>TTQANKHIIVACE<del>GN</del>PyVPVHFDASV<br/> KETA<del>AAK</del>FEROH<del>MD</del>SSTSA<del>AS</del>SSNYC<del>NQ</del>MMKSR<del>NL</del>TK<del>DR</del>CKP<del>VNT</del>FVHESLAD<del>VQ</del>AVCS<del>QK</del>NVACK<del>NG</del>OTNCY<del>Q</del>SYSTMSIT<del>DC</del>RET<del>G</del>SSKYPNCA<del>YK</del>TTQANKHIIVACE<del>GN</del>PyVPVHWDASV</p> <p><b>Proposed:</b> aliSize=124 (resi) RMSD=0.56 (Å)<br/> KETA<del>AAK</del>FEROH<del>MD</del>SSTSA<del>AS</del>SSNYC<del>NQ</del>MMKSR<del>NL</del>TK<del>DR</del>CKP<del>VNT</del>FVHESLAD<del>VQ</del>AVCS<del>QK</del>NVACK<del>NG</del>OTNCY<del>Q</del>SYSTMSIT<del>DC</del>RET<del>G</del>SSKYPNCA<del>YK</del>TTQANKHIIVACE<del>GN</del>PyVPVHFDASV<br/> KETA<del>AAK</del>FEROH<del>MD</del>SSTSA<del>AS</del>SSNYC<del>NQ</del>MMKSR<del>NL</del>TK<del>DR</del>CKP<del>VNT</del>FVHESLAD<del>VQ</del>AVCS<del>QK</del>NVACK<del>NG</del>OTNCY<del>Q</del>SYSTMSIT<del>DC</del>RET<del>G</del>SSKYPNCA<del>YK</del>TTQANKHIIVACE<del>GN</del>PyVPVHWDASV</p> |
| 229 | <p>1f0vA<br/>(124)</p> <hr/> <p>1gioA<br/>(125)</p> | C | 33.06 | <p><b>TM-align:</b> aliSize=103 (resi) RMSD=2.17 (Å)<br/> ke----TAAAK<del>E</del>ROH<del>MD</del>SSTSA<del>AS</del>SSNYC<del>NQ</del>MMKSR<del>NL</del>TK<del>DR</del>CKP<del>VNT</del>FVHESLAD<del>VQ</del>AVCS---QKNVackngqTNCY<del>Q</del>SYSTMSIT<del>DC</del>RET<del>G</del>SSKY<del>NCA</del>YKTTQANKHIIVACE<del>GN</del>pyvpvhfdasv-----<br/> --aqddYRYIH<del>LT</del>OH<del>Y</del>DA-K-PKGRNdEYCFNMKNRR<del>LT</del>-RPCKDRNTH<del>I</del>HGNKN<del>I</del>KA<del>I</del>CEdrnGOPYR-----GDLRI<del>S</del>KSEFOIT<del>I</del>CKHK<del>G</del>SSR<del>P</del>CR<del>Y</del>GATEDSRV<del>I</del>VGCENG-----lpvhfdesfitprh</p> <p><b>SARST:</b> aliSize=97 (resi) RMSD=6.94 (Å)<br/> ketaaakferqhmdsst-----A<del>AS</del>SSNYC<del>NQ</del>MMKSR<del>NL</del>TK<del>DR</del>CKP<del>VNT</del>FVHESLAD<del>VQ</del>AVCS<del>QK</del>NVACK<del>NG</del>OTNCY<del>Q</del>SYSTMSIT<del>DC</del>RET<del>G</del>SSKY<del>NCA</del>YKTTQANKHIIVACE<del>GN</del>PyVPV-----hfdasv<br/> -----aqddyryihfl<del>t</del>qhydakpKGRNDEYCFNMKNRR<del>LT</del>-RPCKDRNTH<del>I</del>HGNKN<del>I</del>KA<del>I</del>CEdrnGOPYR--DLRI<del>S</del>KSEFOIT<del>I</del>CKHK<del>G</del>SSR<del>P</del>CR<del>Y</del>GATEDSRV<del>I</del>VGCENG<del>ng</del>LPVHFDESfitprh-----</p> <p><b>BLAST:</b> aliSize=60 (resi) iden=35.48% (44/124) simi=48.39% (60/124)<br/> ketaaak-----<del>E</del>ROH<del>MD</del>SSTSA<del>AS</del>SSNYC<del>NQ</del>MMKSR<del>NL</del>TK<del>DR</del>CKP<del>VNT</del>FVHESLAD<del>VQ</del>AVCS<del>QK</del>NVACK<del>NG</del>OTNCY<del>Q</del>SYSTMSIT<del>DC</del>RET<del>G</del>SSKY<del>NCA</del>YKTTQANKHIIVACE<del>GN</del>pyVPVHFDAS-----v<br/> -----aqddyryih<del>LT</del>OH<del>Y</del>DAKPKGRNDE-YCFNMKNRR<del>LT</del>-RPCKDRNTH<del>I</del>HGNKN<del>I</del>KA<del>I</del>CEdrnGOPYRDLRI--<del>S</del>KSEFOIT<del>I</del>CKHK<del>G</del>SSR<del>P</del>CR<del>Y</del>GATEDSRV<del>I</del>VGCENG--LPVHFDESfitprh-</p> <p><b>Proposed:</b> aliSize=111 (resi) RMSD=1.95 (Å)<br/> ke----TAAAK<del>E</del>ROH<del>MD</del>SSTSA<del>AS</del>SSNYC<del>NQ</del>MMKSR<del>NL</del>TK<del>DR</del>CKP<del>VNT</del>FVHESLAD<del>VQ</del>AVCS---QKNVackngqTNCY<del>Q</del>SYSTMSIT<del>DC</del>RET<del>G</del>SSKY<del>NCA</del>YKTTQANKHIIVACE<del>GN</del>pyVPVHFDASV-----<br/> --aqddyR-YIH<del>LT</del>OH<del>Y</del>DA-K-PKGRNdEYCFNMKNRR<del>LT</del>-RPCKDRNTH<del>I</del>HGNKN<del>I</del>KA<del>I</del>CEdrnGOPYR-----GDLRI<del>S</del>KSEFOIT<del>I</del>CKHK<del>G</del>SSR<del>P</del>CR<del>Y</del>GATEDSRV<del>I</del>VGCEN--GLPVHFD<del>e</del>SFI<del>t</del>prh</p>                                                                                                                              |
| 230 | <p>1f0vA<br/>(124)</p> <hr/> <p>1gv7A<br/>(123)</p> | C | 41.46 | <p><b>TM-align:</b> aliSize=111 (resi) RMSD=2.01 (Å)<br/> KETA<del>AAK</del>FEROH<del>MD</del>SSTSA<del>AS</del>SSNYC<del>NQ</del>MMKSR<del>NL</del>TK<del>DR</del>CKP<del>VNT</del>FVHESLAD<del>VQ</del>AVCS<del>QK</del>NVACK<del>NG</del>OTNCY<del>Q</del>SYSTMSIT<del>DC</del>RET<del>G</del>SSKY<del>NCA</del>YKTTQANKHIIVACE<del>GN</del>pyvpvhfdasv-----<br/> DNSRYTH<del>LT</del>OH<del>Y</del>DAKPOGR-DDRYCESIMRR<del>R</del>GLT-SPCKDINT<del>I</del>HGNKRSIKAI<del>I</del>CSQKNVACK<del>NG</del>OTNCY<del>Q</del>SYSTMSIT<del>DC</del>RET<del>G</del>SSKY<del>NCA</del>YKTTQANKHIIVACE<del>GN</del>pyvpvhfdasv-----lpvhdqsifr</p> <p><b>SARST:</b> aliSize=113 (resi) RMSD=5.97 (Å)<br/> ket---AAAK<del>E</del>ROH<del>MD</del>SSTSA<del>AS</del>SSNYC<del>NQ</del>MMKSR<del>NL</del>TK<del>DR</del>CKP<del>VNT</del>FVHESLAD<del>VQ</del>AVCS<del>QK</del>NVACK<del>NG</del>OTNCY<del>Q</del>SYSTMSIT<del>DC</del>RET<del>G</del>SSKY<del>NCA</del>YKTTQANKHIIVACE<del>GN</del>PyVPVHFDASV-----dasv<br/> ---dnsRYTH<del>LT</del>OH<del>Y</del>DAKPOGR-DDRYCESIMRR<del>R</del>GLT-SPCKDINT<del>I</del>HGNKRSIKAI<del>I</del>CSQKNVACK<del>NG</del>OTNCY<del>Q</del>SYSTMSIT<del>DC</del>RET<del>G</del>SSKY<del>NCA</del>YKTTQANKHIIVACE<del>GN</del>PyVPVHFDASV-----CENGLPVHLDqsifr----</p> <p><b>BLAST:</b> aliSize=72 (resi) iden=42.62% (52/123) simi=59.02% (72/123)<br/> ketaaak-----<del>E</del>ROH<del>MD</del>SSTSA<del>AS</del>SSNYC<del>NQ</del>MMKSR<del>NL</del>TK<del>DR</del>CKP<del>VNT</del>FVHESLAD<del>VQ</del>AVCS<del>QK</del>NVACK<del>NG</del>OTNCY<del>Q</del>SYSTMSIT<del>DC</del>RET<del>G</del>SSKY<del>NCA</del>YKTTQANKHIIVACE<del>GN</del>pyVPVHFDASV--<br/> -----dnsryth<del>LT</del>OH<del>Y</del>DAKPOGRDD-RYCESIMRR<del>R</del>GLTSP-CKDINT<del>I</del>HGNKRSIKAI<del>I</del>CSQKNVACK<del>NG</del>OTNCY<del>Q</del>SYSTMSIT<del>DC</del>RET<del>G</del>SSKY<del>NCA</del>YKTTQANKHIIVACE<del>GN</del>pyVPVHFDASV--LPVHLDQsifr</p> <p><b>Proposed:</b> aliSize=117 (resi) RMSD=1.40 (Å)<br/> ke---TAAAK<del>E</del>ROH<del>MD</del>SSTSA<del>AS</del>SSNYC<del>NQ</del>MMKSR<del>NL</del>TK<del>DR</del>CKP<del>VNT</del>FVHESLAD<del>VQ</del>AVCS<del>QK</del>NVACK<del>NG</del>OTNCY<del>Q</del>SYSTMSIT<del>DC</del>RET<del>G</del>SSKY<del>NCA</del>YKTTQANKHIIVACE<del>GN</del>pyVPVHFDASV-SV-<br/> --pdn<del>S</del>RYTH<del>LT</del>OH<del>Y</del>DAKPOGR--GRDDRYCESIMRR<del>R</del>GLT-SPCKDINT<del>I</del>HGNKRSIKAI<del>I</del>CSQKNVACK<del>NG</del>OTNCY<del>Q</del>SYSTMSIT<del>DC</del>RET<del>G</del>SSKY<del>NCA</del>YKTTQANKHIIVACE<del>GN</del>pyVPVHFDASV-SV-</p>                                                                                                  |

|     |                |   |       |                                                                                                                                                                                                                                                                                                                                                                                                                                                                                                                                                                                                                                                                                                                                                                                                                                                                                                                                                                                                                                                                                                                                                                                                                                                                                                                                           |
|-----|----------------|---|-------|-------------------------------------------------------------------------------------------------------------------------------------------------------------------------------------------------------------------------------------------------------------------------------------------------------------------------------------------------------------------------------------------------------------------------------------------------------------------------------------------------------------------------------------------------------------------------------------------------------------------------------------------------------------------------------------------------------------------------------------------------------------------------------------------------------------------------------------------------------------------------------------------------------------------------------------------------------------------------------------------------------------------------------------------------------------------------------------------------------------------------------------------------------------------------------------------------------------------------------------------------------------------------------------------------------------------------------------------|
| 231 | 1f0vA<br>(124) | C | 99.19 | <p>TM-align: aliSize=115 (resi) RMSD=1.30 (Å)</p> <p>KETAAAKFERQHMDSSSTAAASSSNYNQMMKSRNLTKDRCKPVNTLVHESLADVOAVCSQKNVACKNGOTNCSYQSYSTMSITDCRETGSSKYPNCAYKTTQANKHIIVACEGNPYvpvhfdasv-----<br/> KETAAAKFERQHMDSSSTAAASSSNYNQMMKSRNLTKDRCKPVNTLVHESLADVOAVCSQKNVACKNGOTNCSYQSYSTMSITDCRETGSSKYPNCAYKTTQANKHIIVACEGNPY-----vpvhfdasv</p> <p>SARST: aliSize=122 (resi) RMSD=8.84 (Å)</p> <p>k-ETAAAKFERQHMDSSSTAAASSSNYNQMMKSRNLTKDRCKPVNTLVHESLADVOAVCSQKNVACKNGOTNCSYQSYSTMSITDCRETGSSKYPNCAYKTTQANKHIIVACEGNPYVPVHFDAV-v<br/> -kETAAAKFERQHMDSSSTAAASSSNYNQMMKSRNLTKDRCKPVNTLVHESLADVOAVCSQKNVACKNGOTNCSYQSYSTMSITDCRETGSSKYPNCAYKTTQANKHIIVACEGNPYVPVHFDAVv-</p> <p>BLAST: aliSize=123 (resi) iden=99.19% (123/124) simi=99.19% (123/124)</p> <p>KETAAAKFERQHMDSSSTAAASSSNYNQMMKSRNLTKDRCKPVNTLVHESLADVOAVCSQKNVACKNGOTNCSYQSYSTMSITDCRETGSSKYPNCAYKTTQANKHIIVACEGNPYVPVHFDAV<br/> KETAAAKFERQHMDSSSTAAASSSNYNQMMKSRNLTKDRCKPVNTLVHESLADVOAVCSQKNVACKNGOTNCSYQSYSTMSITDCRETGSSKYPNCAYKTTQANKHIIVACEGNPYVPVHFDAV</p> <p>Proposed: aliSize=124 (resi) RMSD=0.48 (Å)</p> <p>KETAAAKFERQHMDSSSTAAASSSNYNQMMKSRNLTKDRCKPVNTLVHESLADVOAVCSQKNVACKNGOTNCSYQSYSTMSITDCRETGSSKYPNCAYKTTQANKHIIVACEGNPYVPVHFDAV<br/> KETAAAKFERQHMDSSSTAAASSSNYNQMMKSRNLTKDRCKPVNTLVHESLADVOAVCSQKNVACKNGOTNCSYQSYSTMSITDCRETGSSKYPNCAYKTTQANKHIIVACEGNPYVPVHFDAV</p> |
|     | lizpA<br>(124) |   |       |                                                                                                                                                                                                                                                                                                                                                                                                                                                                                                                                                                                                                                                                                                                                                                                                                                                                                                                                                                                                                                                                                                                                                                                                                                                                                                                                           |
| 232 | 1f0vA<br>(124) | C | 99.19 | <p>TM-align: aliSize=115 (resi) RMSD=1.32 (Å)</p> <p>KETAAAKFERQHMDSSSTAAASSSNYNQMMKSRNLTKDRCKPVNTLVHESLADVOAVCSQKNVACKNGOTNCSYQSYSTMSITDCRETGSSKYPNCAYKTTQANKHIIVACEGNPYvpvhfdasv-----<br/> KETAAAKFERQHMDSSSTAAASSSNYNQMMKSRNLTKDRCKPVNTLVHESLADVOAVCSQKNVACKNGOTNCSYQSYSTMSITDCRETGSSKYPNCAYKTTQANKHIIVACEGNPY-----vpvhfdasv</p> <p>SARST: aliSize=122 (resi) RMSD=8.83 (Å)</p> <p>k-ETAAAKFERQHMDSSSTAAASSSNYNQMMKSRNLTKDRCKPVNTLVHESLADVOAVCSQKNVACKNGOTNCSYQSYSTMSITDCRETGSSKYPNCAYKTTQANKHIIVACEGNPYVPVHFDAV-v<br/> -kETAAAKFERQHMDSSSTAAASSSNYNQMMKSRNLTKDRCKPVNTLVHESLADVOAVCSQKNVACKNGOTNCSYQSYSTMSITDCRETGSSKYPNCAYKTTQANKHIIVACEGNPYVPVHFDAVv-</p> <p>BLAST: aliSize=123 (resi) iden=99.19% (123/124) simi=99.19% (123/124)</p> <p>KETAAAKFERQHMDSSSTAAASSSNYNQMMKSRNLTKDRCKPVNTLVHESLADVOAVCSQKNVACKNGOTNCSYQSYSTMSITDCRETGSSKYPNCAYKTTQANKHIIVACEGNPYVPVHFDAV<br/> KETAAAKFERQHMDSSSTAAASSSNYNQMMKSRNLTKDRCKPVNTLVHESLADVOAVCSQKNVACKNGOTNCSYQSYSTMSITDCRETGSSKYPNCAYKTTQANKHIIVACEGNPYVPVHFDAV</p> <p>Proposed: aliSize=124 (resi) RMSD=0.52 (Å)</p> <p>KETAAAKFERQHMDSSSTAAASSSNYNQMMKSRNLTKDRCKPVNTLVHESLADVOAVCSQKNVACKNGOTNCSYQSYSTMSITDCRETGSSKYPNCAYKTTQANKHIIVACEGNPYVPVHFDAV<br/> KETAAAKFERQHMDSSSTAAASSSNYNQMMKSRNLTKDRCKPVNTLVHESLADVOAVCSQKNVACKNGOTNCSYQSYSTMSITDCRETGSSKYPNCAYKTTQANKHIIVACEGNPYVPVHFDAV</p> |
|     | lizqA<br>(124) |   |       |                                                                                                                                                                                                                                                                                                                                                                                                                                                                                                                                                                                                                                                                                                                                                                                                                                                                                                                                                                                                                                                                                                                                                                                                                                                                                                                                           |
| 233 | 1f0vA<br>(124) | C | 99.19 | <p>TM-align: aliSize=115 (resi) RMSD=1.55 (Å)</p> <p>KETAAAKFERQHMDSSSTAAASSSNYNQMMKSRNLTKDRCKPVNTLVHESLADVOAVCSQKNVACKNGOTNCSYQSYSTMSITDCRETGSSKYPNCAYKTTQANKHIIVACEGNPYvpvhfdasv-----<br/> KETAAAKFERQHMDSSSTAAASSSNYNQMMKSRNLTKDRCKPVNTLVHESLADVOAVCSQKNVACKNGOTNCSYQSYSTMSITDCRETGSSKYPNCAYKTTQANKHIIVACEGNPY-----vpvhfdasv</p> <p>SARST: aliSize=122 (resi) RMSD=8.86 (Å)</p> <p>k-ETAAAKFERQHMDSSSTAAASSSNYNQMMKSRNLTKDRCKPVNTLVHESLADVOAVCSQKNVACKNGOTNCSYQSYSTMSITDCRETGSSKYPNCAYKTTQANKHIIVACEGNPYVPVHFDAV-v<br/> -kETAAAKFERQHMDSSSTAAASSSNYNQMMKSRNLTKDRCKPVNTLVHESLADVOAVCSQKNVACKNGOTNCSYQSYSTMSITDCRETGSSKYPNCAYKTTQANKHIIVACEGNPYVPVHFDAVv-</p> <p>BLAST: aliSize=123 (resi) iden=99.19% (123/124) simi=99.19% (123/124)</p> <p>KETAAAKFERQHMDSSSTAAASSSNYNQMMKSRNLTKDRCKPVNTLVHESLADVOAVCSQKNVACKNGOTNCSYQSYSTMSITDCRETGSSKYPNCAYKTTQANKHIIVACEGNPYVPVHFDAV<br/> KETAAAKFERQHMDSSSTAAASSSNYNQMMKSRNLTKDRCKPVNTLVHESLADVOAVCSQKNVACKNGOTNCSYQSYSTMSITDCRETGSSKYPNCAYKTTQANKHIIVACEGNPYVPVHFDAV</p> <p>Proposed: aliSize=124 (resi) RMSD=0.96 (Å)</p> <p>KETAAAKFERQHMDSSSTAAASSSNYNQMMKSRNLTKDRCKPVNTLVHESLADVOAVCSQKNVACKNGOTNCSYQSYSTMSITDCRETGSSKYPNCAYKTTQANKHIIVACEGNPYVPVHFDAV<br/> KETAAAKFERQHMDSSSTAAASSSNYNQMMKSRNLTKDRCKPVNTLVHESLADVOAVCSQKNVACKNGOTNCSYQSYSTMSITDCRETGSSKYPNCAYKTTQANKHIIVACEGNPYVPVHFDAV</p> |
|     | lizrA<br>(124) |   |       |                                                                                                                                                                                                                                                                                                                                                                                                                                                                                                                                                                                                                                                                                                                                                                                                                                                                                                                                                                                                                                                                                                                                                                                                                                                                                                                                           |

|     |                                               |   |        |                                                                                                                                                                                                                                                                                                                                                                                                                                                                                                                                                                                                                                                                                                                                                                                                                                                                                                                                                                                                                                                                                                                                                                                                                                                                                                                                                                                                |
|-----|-----------------------------------------------|---|--------|------------------------------------------------------------------------------------------------------------------------------------------------------------------------------------------------------------------------------------------------------------------------------------------------------------------------------------------------------------------------------------------------------------------------------------------------------------------------------------------------------------------------------------------------------------------------------------------------------------------------------------------------------------------------------------------------------------------------------------------------------------------------------------------------------------------------------------------------------------------------------------------------------------------------------------------------------------------------------------------------------------------------------------------------------------------------------------------------------------------------------------------------------------------------------------------------------------------------------------------------------------------------------------------------------------------------------------------------------------------------------------------------|
| 234 | <p>1f0vA<br/>(124)</p> <p>1j80B<br/>(101)</p> | C | 100.00 | <p><b>TM-align:</b> aliSize=91 (resi) RMSD=1.07 (Å)<br/> ketaaakferqhmdsstsaasssNYCNQMMKSRNLTKDRCKPVNTFVHESLADVOAVCSQKNVACKNGQTNCYQSYSTMSITDCRETGSSKYPNCA YKTTQANKHIIVACEGNPYPVPHFDASV-----<br/> -----NYCNQMMKSRNLTKDRCKPVNTFVHESLADVOAVCSQKNVACKNGQTNCYQSYSTMSITDCRETGSSKYPNCA YKTTQANKHIIVACEGNP-----yvpvhfdasv</p> <p><b>SARST:</b> aliSize=99 (resi) RMSD=9.76 (Å)<br/> ketaaakferqhmdsstsaasssNYCNQMMKSRNLTKDRCKPVNTFVHESLADVOAVCSQKNVACKNGQTNCYQSYSTMSITDCRETGSSKYPNCA YKTTQANKHIIVACEGNPYPVPHFDASV-----v<br/> -----NYCNQMMKSRNLTKDRCKPVNTFVHESLADVOAVCSQKNVACKNGQTNCYQSYSTMSITDCRETGSSKYPNCA YKTTQANKHIIVACEGNPYPVPHFDASV-----v</p> <p><b>BLAST:</b> aliSize=101 (resi) iden=100.00% (101/101) simi=100.00% (101/101)<br/> ketaaakferqhmdsstsaasssNYCNQMMKSRNLTKDRCKPVNTFVHESLADVOAVCSQKNVACKNGQTNCYQSYSTMSITDCRETGSSKYPNCA YKTTQANKHIIVACEGNPYPVPHFDASV<br/> -----NYCNQMMKSRNLTKDRCKPVNTFVHESLADVOAVCSQKNVACKNGQTNCYQSYSTMSITDCRETGSSKYPNCA YKTTQANKHIIVACEGNPYPVPHFDASV</p> <p><b>Proposed:</b> aliSize=101 (resi) RMSD=0.71 (Å)<br/> ketaaakferqhmdsstsaasssNYCNQMMKSRNLTKDRCKPVNTFVHESLADVOAVCSQKNVACKNGQTNCYQSYSTMSITDCRETGSSKYPNCA YKTTQANKHIIVACEGNPYPVPHFDASV<br/> -----NYCNQMMKSRNLTKDRCKPVNTFVHESLADVOAVCSQKNVACKNGQTNCYQSYSTMSITDCRETGSSKYPNCA YKTTQANKHIIVACEGNPYPVPHFDASV</p>                                                                                              |
| 235 | <p>1f0vA<br/>(124)</p> <p>1kh8A<br/>(125)</p> | C | 97.58  | <p><b>TM-align:</b> aliSize=114 (resi) RMSD=1.19 (Å)<br/> -KETAAAKFERQHMDSSSTAASSSNYCNQMMKSRNLTKDRCKPVNTFVHESLADVOAVCSQKNVACKNGQTNCYQSYSTMSITDCRETGSSKYPNCA YKTTQANKHIIVACEGNPYPVPHFDASV-----<br/> m-KETAAAKFERQHMDSSSTAASSSNYCNQMMKSRNLTKDRCKPVNTFVHESLADVOAVCSQKNVACKNGQTNCYQSYSTMSITDCRETGSSKYPNCA YKTTQANKHIIVACEGNP-----yvpvhfdasv</p> <p><b>SARST:</b> aliSize=122 (resi) RMSD=8.83 (Å)<br/> k--ETAAAKFERQHMDSSSTAASSSNYCNQMMKSRNLTKDRCKPVNTFVHESLADVOAVCSQKNVACKNGQTNCYQSYSTMSITDCRETGSSKYPNCA YKTTQANKHIIVACEGNPYPVPHFDASV-----v<br/> -mk-ETAAAKFERQHMDSSSTAASSSNYCNQMMKSRNLTKDRCKPVNTFVHESLADVOAVCSQKNVACKNGQTNCYQSYSTMSITDCRETGSSKYPNCA YKTTQANKHIIVACEGNPYPVPHFDASV-----v</p> <p><b>BLAST:</b> aliSize=123 (resi) iden=99.19% (123/124) simi=99.19% (123/124)<br/> -KETAAAKFERQHMDSSSTAASSSNYCNQMMKSRNLTKDRCKPVNTFVHESLADVOAVCSQKNVACKNGQTNCYQSYSTMSITDCRETGSSKYPNCA YKTTQANKHIIVACEGNPYPVPHFDASV<br/> m-KETAAAKFERQHMDSSSTAASSSNYCNQMMKSRNLTKDRCKPVNTFVHESLADVOAVCSQKNVACKNGQTNCYQSYSTMSITDCRETGSSKYPNCA YKTTQANKHIIVACEGNPYPVPHFDASV</p> <p><b>Proposed:</b> aliSize=122 (resi) RMSD=0.73 (Å)<br/> -KETAAAKFERQHMDSSSTAASSSNYCNQMMKSRNLTKDRCKPVNTFVHESLADVOAVCSQKNVACKNGQTNCYQSYSTMSITDCRETGSSKYPNCA YKTTQANKHIIVACEGNPYPVPHFDASV<br/> m-KETAAAKFERQHMDSSSTAASSSNYCNQMMKSRNLTKDRCKPVNTFVHESLADVOAVCSQKNVACKNGQTNCYQSYSTMSITDCRETGSSKYPNCA YKTTQANKHIIVACEGNP-----GYVPVPHFDASV</p> |
| 236 | <p>1f0vA<br/>(124)</p> <p>1kvzA<br/>(107)</p> | C | 23.36  | <p><b>TM-align:</b> aliSize=92 (resi) RMSD=2.74 (Å)<br/> kETAAAKFERQHMDSSSTAASSSNYCNQMMKSRNLTKDRCKPVNTFVHESLADVOAVCSQKNVACKNGQTNCYQSYSTMSITDCRETGSSKYPNCA YKTTQANKHIIVACEGNPYPVPHFDASV-----<br/> -MQDWITKKKHLTD-T-WDV---DNDL-MPTSLFD---CKDKNTHIYSLPGPKALCRGVIFSA-----DVLNSSEFYLAENVKPRKPC---KYLKSSNRICIRCEHE-----lpvhfagvgicp</p> <p><b>SARST:</b> aliSize=99 (resi) RMSD=10.79 (Å)<br/> keta---AAKFERQHMDSSSTAASSSNYCNQMMKSRNLTKDRCKPVNTFVHESLADVOAVCSQKNVACKNGQTNCYQSYSTMSITDCRETGSSKYPNCA YKTTQANKHIIVACEGNPYPVPHFDASV-----v<br/> ----mqdWITKKKHLTD-T-WDV---DNDL-MPTSLFD---CKDKNTHIYSLPGPKALCRGVIFSA-----DVLNSSEFYLAENVKPRKPC---KYLKSSNRICIRCEHE-----lpvhfagvgicp</p> <p><b>BLAST:</b> aliSize=53 (resi) iden=27.10% (29/107) simi=49.53% (53/107)<br/> ketaa----AAKFERQHMDSSSTAASSSNYCNQMMKSRNLTKDRCKPVNTFVHESLADVOAVCSQKNVACKNGQTNCYQSYSTMSITDCRETGSSKYPNCA YKTTQANKHIIVACEGNPYPVPHFDASV-----dasv<br/> ----mqdWITKKKHLTD-T-WDV---DNDL-MPTSLFD---CKDKNTHIYSLPGPKALCRGVIFSA-----DVLNSSEFYLAENVKPRKPC---KYLKSSNRICIRCEHE-----lpvhfagvgicp</p> <p><b>Proposed:</b> aliSize=96 (resi) RMSD=1.91 (Å)<br/> ket---AAKFERQHMDSSSTAASSSNYCNQMMKSRNLTKDRCKPVNTFVHESLADVOAVCSQKNVACKNGQTNCYQSYSTMSITDCRETGSSKYPNCA YKTTQANKHIIVACEGNPYPVPHFDASV-----<br/> ----mqdWITKKKHLTD-T-WDV---DNDL-MPTSLFD---CKDKNTHIYSLPGPKALCRGVIFSA-----DVLNSSEFYLAENVKPRKPC---KYLKSSNRICIRCEHE-----lpvhfagvgicp</p>         |

|     |                |   |        |                                                                                                                                                                                                                                                                                                                                                                                                                                                                                                                                                                                                                                                                                                                                                                                                                                                                                                                                                                                                                                                                                                                                                                                                                                                                                                                                                                                    |
|-----|----------------|---|--------|------------------------------------------------------------------------------------------------------------------------------------------------------------------------------------------------------------------------------------------------------------------------------------------------------------------------------------------------------------------------------------------------------------------------------------------------------------------------------------------------------------------------------------------------------------------------------------------------------------------------------------------------------------------------------------------------------------------------------------------------------------------------------------------------------------------------------------------------------------------------------------------------------------------------------------------------------------------------------------------------------------------------------------------------------------------------------------------------------------------------------------------------------------------------------------------------------------------------------------------------------------------------------------------------------------------------------------------------------------------------------------|
| 237 | 1f0vA<br>(124) | C | 24.76  | <p><b>TM-align:</b> aliSize=91 (resi) RMSD=2.37 (Å)</p> <p>kETAAAKFERQHMDSSsAASsnYCNQMMKSRNLTKDRCKPVNTFVHESLADVQAVCSQknvackngq---TNCYQSYSTMSITDCREIGSSkypnAYKTTQANKHIIVACEGNpyvpvhfdasv-----<br/> -MQDWLTFQKKHITN-IRDV---DNDNLSTNLFH---CKDKNTFIYSRPEPKAICG-----iiaSKNVLITSEFYLSDCNVTISRP----KYKLLKSTNKFCVTCENQ-----apvhfvvgsc</p> <p><b>SARST:</b> aliSize=99 (resi) RMSD=10.84 (Å)</p> <p>keta---AAKFERQHMDSSsAASsnycnqMMKSRNLTKDRCKPVNTFVHESLADVQAVCSQknvackngqTNCYQSYSTMSITDCREIGSSkypncaYKTTQANKHIIVACEGNpyVPVHFDAS---v<br/> ---mqdWLTQKKHITN-IRDV-----CDNILSTNLFHCKDKNTFIYSRPEPKAICG-----KGIISKNVLITSEFYLSDCNVTIS--RPCK--YKLLKSTNK--FCVTCEVQAPVHFDASVgsc-</p> <p><b>BLAST:</b> aliSize=54 (resi) iden=32.38% (34/105) simi=51.43% (54/105)</p> <p>ketaaak-----FERQHMDSSSTAASsnYCNQMMKSRNLTKDRCKPVNTFVHESLADVQAVCSQKNVACKNGQTNcyqsySTMSITDCREIGSSkypncaYKTTQANKHIIVACEGNpyVPVHFDASV-----dasv<br/> -----mqdwltQKKHITNTRDV-----CDNILSTNLFH---HCKDKNTFIYSRPEPKAICG-KGIISKNVLIT-----SEFYLSDCNVTIS--RP--KYKLLKSTNKFCVTCENQ--APVHFDASVgsc----</p> <p><b>Proposed:</b> aliSize=97 (resi) RMSD=1.68 (Å)</p> <p>keTA-AAKFERQHMDSSsAASsnYCNQMMKSRNLTKDRCKPVNTFVHESLADVQAVCS-----qknvackngqTNCYQSYSTMSITDCREIGSSkypnAYKTTQANKHIIVACEGNpyVPVHFDASV--<br/> --MQDWLTFQKKHITN-IRDV---DNDNLSTNLFH---CKDKNTFIYSRPEPKAICGgias-----KNVLITSEFYLSDCNVTISRP----KYKLLKSTNKFCVTCENQ--QAPVHFDASVgsc</p> |
|     | 1pu3A<br>(105) |   |        |                                                                                                                                                                                                                                                                                                                                                                                                                                                                                                                                                                                                                                                                                                                                                                                                                                                                                                                                                                                                                                                                                                                                                                                                                                                                                                                                                                                    |
| 238 | 1f0vA<br>(124) | C | 77.42  | <p><b>TM-align:</b> aliSize=113 (resi) RMSD=2.45 (Å)</p> <p>k-ETAAAKFERQHMDSSSTAASSN-FCNQMMSRNLTKDRCKPVNTFVHESLADVQAVCSQKNVACKNGQTNcyqsySTMSITDCREIGSSKYPNCAKTTQANKHIIVACEGNpyvpvhfdasv-----<br/> -kESAAAKFERQHMDSGNS-PSSSNFCNLMCCCKMTQKCKPVNTFVHESLADVQAVCSQKNVACKNGQTNcyqsySTMSITDCREIGSSKYPNCAKTTQVEKHIIVACGGKPS-----vpvhfdasv</p> <p><b>SARST:</b> aliSize=120 (resi) RMSD=9.19 (Å)</p> <p>k-ETAAAKFERQHMDSSSTAASSNFCNQMMSRNLTKDRCKPVNTFVHESLADVQAVCSQKNVACKNGQTNcyqsySTMSITDCREIGSSKYPNCAKTTQANKHIIVACEGNpyVPVHFDASV-v<br/> -kESAAAKFERQHMDSGNS-PSSSNYCNLMCCCKMTQKCKPVNTFVHESLADVQAVCSQKNVACKNGQTNcyqsySTMSITDCREIGSSKYPNCAKTTQVEKHIIVACGGKPSVPVHFDASV-v</p> <p><b>BLAST:</b> aliSize=107 (resi) iden=80.65% (100/124) simi=86.29% (107/124)</p> <p>KEETAAAKFERQHMDSSSTAASSNFCNQMMSRNLTKDRCKPVNTFVHESLADVQAVCSQKNVACKNGQTNcyqsySTMSITDCREIGSSKYPNCAKTTQANKHIIVACEGNpyVPVHFDASV<br/> KESAAAKFERQHMDSGNS-PSSSNYCNLMCCCKMTQKCKPVNTFVHESLADVQAVCSQKNVACKNGQTNcyqsySTMSITDCREIGSSKYPNCAKTTQVEKHIIVACGGKPSVPVHFDASV</p> <p><b>Proposed:</b> aliSize=120 (resi) RMSD=1.90 (Å)</p> <p>ke-ETAAAKFERQHMDSSSTAASSN-FCNQMMSRNLTKDRCKPVNTFVHESLADVQAVCSQKNVACKNGQTNcyqsySTMSITDCREIGSSKYPNCAKTTQANKHIIVACEGNpyVPVHFDASV<br/> --keSAAAKFERQHMDSGNS-PSSSNYCNLMCCCKMTQKCKPVNTFVHESLADVQAVCSQKNVACKNGQTNcyqsySTMSITDCREIGSSKYPNCAKTTQVEKHIIVACGGKPSVPVHFDASV</p>                               |
|     | 1qwqA<br>(124) |   |        |                                                                                                                                                                                                                                                                                                                                                                                                                                                                                                                                                                                                                                                                                                                                                                                                                                                                                                                                                                                                                                                                                                                                                                                                                                                                                                                                                                                    |
| 239 | 1f0vA<br>(124) | C | 100.00 | <p><b>TM-align:</b> aliSize=114 (resi) RMSD=1.29 (Å)</p> <p>kETAAAKFERQHMDSSSTAASSNFCNQMMSRNLTKDRCKPVNTFVHESLADVQAVCSQKNVACKNGQTNcyqsySTMSITDCREIGSSKYPNCAKTTQANKHIIVACEGNpyvpvhfdasv-----<br/> -ETAAAKFERQHMDSSSTAASSNFCNQMMSRNLTKDRCKPVNTFVHESLADVQAVCSQKNVACKNGQTNcyqsySTMSITDCREIGSSKYPNCAKTTQANKHIIVACEGNpy-----vpvhfdasv</p> <p><b>SARST:</b> aliSize=121 (resi) RMSD=8.85 (Å)</p> <p>ke-ETAAAKFERQHMDSSSTAASSNFCNQMMSRNLTKDRCKPVNTFVHESLADVQAVCSQKNVACKNGQTNcyqsySTMSITDCREIGSSKYPNCAKTTQANKHIIVACEGNpyVPVHFDASV-v<br/> --eETAAAKFERQHMDSSSTAASSNFCNQMMSRNLTKDRCKPVNTFVHESLADVQAVCSQKNVACKNGQTNcyqsySTMSITDCREIGSSKYPNCAKTTQANKHIIVACEGNpyVPVHFDASV-v</p> <p><b>BLAST:</b> aliSize=123 (resi) iden=100.00% (123/123) simi=100.00% (123/123)</p> <p>KEETAAAKFERQHMDSSSTAASSNFCNQMMSRNLTKDRCKPVNTFVHESLADVQAVCSQKNVACKNGQTNcyqsySTMSITDCREIGSSKYPNCAKTTQANKHIIVACEGNpyVPVHFDASV<br/> -ETAAAKFERQHMDSSSTAASSNFCNQMMSRNLTKDRCKPVNTFVHESLADVQAVCSQKNVACKNGQTNcyqsySTMSITDCREIGSSKYPNCAKTTQANKHIIVACEGNpyVPVHFDASV</p> <p><b>Proposed:</b> aliSize=123 (resi) RMSD=0.47 (Å)</p> <p>KEETAAAKFERQHMDSSSTAASSNFCNQMMSRNLTKDRCKPVNTFVHESLADVQAVCSQKNVACKNGQTNcyqsySTMSITDCREIGSSKYPNCAKTTQANKHIIVACEGNpyVPVHFDASV<br/> -ETAAAKFERQHMDSSSTAASSNFCNQMMSRNLTKDRCKPVNTFVHESLADVQAVCSQKNVACKNGQTNcyqsySTMSITDCREIGSSKYPNCAKTTQANKHIIVACEGNpyVPVHFDASV</p>                                  |
|     | 1rasA<br>(123) |   |        |                                                                                                                                                                                                                                                                                                                                                                                                                                                                                                                                                                                                                                                                                                                                                                                                                                                                                                                                                                                                                                                                                                                                                                                                                                                                                                                                                                                    |



|     |                                                           |   |       |                                                                                                                                                                                                                                                                                                                                                                                                                                                                                                                                                                                                                                                                                                                                                                                                                                                                                                                                                                                                                                                                                                                                                                                                                                                                                                                                                                                            |
|-----|-----------------------------------------------------------|---|-------|--------------------------------------------------------------------------------------------------------------------------------------------------------------------------------------------------------------------------------------------------------------------------------------------------------------------------------------------------------------------------------------------------------------------------------------------------------------------------------------------------------------------------------------------------------------------------------------------------------------------------------------------------------------------------------------------------------------------------------------------------------------------------------------------------------------------------------------------------------------------------------------------------------------------------------------------------------------------------------------------------------------------------------------------------------------------------------------------------------------------------------------------------------------------------------------------------------------------------------------------------------------------------------------------------------------------------------------------------------------------------------------------|
| 240 | <p><b>1f0vA (124)</b></p> <hr/> <p><b>1rmfA (120)</b></p> | C | 43.33 | <p><b>TM-align: aliSize=112 (resi) RMSD=1.99 (Å)</b><br/> K-ETAAAKFERQHMDSSSTsAASSSNYCNOQMMKSRNLTkDRCKPVNTFVHESLADVOAVCSQKNVACKNGQTNQYQSYSTMSITDCRETGSSKYPNCAKTTQANKHIIVACEGNPYvpvhfdasv-----<br/> MqDGMYQRFRLROHVHPPEE-TGGSDRYCNLMQRKMLYHCKRFNTHIEDIWNIRSI CSTTNIQCKNGKMNCHEG--VVKVTDICRDTGSSRAPNCRVRAIASTRRVVIACEGNPQ-----vpvhfdg</p> <p><b>SARST: aliSize=115 (resi) RMSD=6.88 (Å)</b><br/> ket---AAAKFERQHMDSSSTsAASSSNYCNOQMMKSRNLTkDRCKPVNTFVHESLADVOAVCSQKNVACKNGQTNQYQSYSTMSITDCRETGSSKYPNCAKTTQANKHIIVACEGNPYVPVHFDA-sv<br/> ---mqdGMYQRFRLROHVHPPEE-TGGSDRYCNLMQRKMLYHCKRFNTHIEDIWNIRSI CSTTNIQCKNGKMNCHEG--GVVKVTDICRDTGSSRAPNCRVRAIASTRRVVIACEGNPQVPVHFDAg---</p> <p><b>BLAST: aliSize=78 (resi) iden=43.33% (52/120) simi=65.00% (78/120)</b><br/> ketaaa-----KFERQHMDSSSTsAASSSNYCNOQMMKSRNLTkDRCKPVNTFVHESLADVOAVCSQKNVACKNGQTNQYQSYSTMSITDCRETGSSKYPNCAKTTQANKHIIVACEGNPYVPVHFDA-sv<br/> -----mqdGMYQRFRLROHVHPPEE-TGGSDRYCNLMQRKMLYHCKRFNTHIEDIWNIRSI CSTTNIQCKNGKMNCHEG--GVVKVTDICRDTGSSRAPNCRVRAIASTRRVVIACEGNPQVPVHFDAg---</p> <p><b>Proposed: aliSize=117 (resi) RMSD=1.20 (Å)</b><br/> ke---TAAAKFERQHMDSSSTsAASSSNYCNOQMMKSRNLTkDRCKPVNTFVHESLADVOAVCSQKNVACKNGQTNQYQSYSTMSITDCRETGSSKYPNCAKTTQANKHIIVACEGNPYVPVHFDA-sv<br/> ---mqdGMYQRFRLROHVHPPEE-TGGSDRYCNLMQRKMLYHCKRFNTHIEDIWNIRSI CSTTNIQCKNGKMNCHEG--VVKVTDICRDTGSSRAPNCRVRAIASTRRVVIACEGNPQVPVHFDAg---</p> |
| 241 | <p><b>1f0vA (124)</b></p> <hr/> <p><b>1rraA (124)</b></p> | C | 66.94 | <p><b>TM-align: aliSize=115 (resi) RMSD=1.51 (Å)</b><br/> KETAALKFERQHMDSSSTsAASSSNYCNOQMMKSRNLTkDRCKPVNTFVHESLADVOAVCSQKNVACKNGQTNQYQSYSTMSITDCRETGSSKYPNCAKTTQANKHIIVACEGNPYvpvhfdasv-----<br/> AESSADKFKROHMDTEGPKSSPTYCNQMMKROGMTGSKCPVNTFVHESLADVOAVCSQKNVACKNGQTNQYQSYSTMSITDCRETGSSKYPNCAKTTQANKHIIVACEGNPYvpvhfdasv-----vpvhfdasv</p> <p><b>SARST: aliSize=122 (resi) RMSD=8.84 (Å)</b><br/> k-ETAAAKFERQHMDSSSTsAASSSNYCNOQMMKSRNLTkDRCKPVNTFVHESLADVOAVCSQKNVACKNGQTNQYQSYSTMSITDCRETGSSKYPNCAKTTQANKHIIVACEGNPYVPVHFDA-sv<br/> -aESSADKFKROHMDTEGPKSSPTYCNQMMKROGMTGSKCPVNTFVHESLADVOAVCSQKNVACKNGQTNQYQSYSTMSITDCRETGSSKYPNCAKTTQANKHIIVACEGNPYVPVHFDA-sv</p> <p><b>BLAST: aliSize=98 (resi) iden=66.94% (83/124) simi=79.03% (98/124)</b><br/> k-ETAAAKFERQHMDSSSTsAASSSNYCNOQMMKSRNLTkDRCKPVNTFVHESLADVOAVCSQKNVACKNGQTNQYQSYSTMSITDCRETGSSKYPNCAKTTQANKHIIVACEGNPYVPVHFDA-sv<br/> -aESSADKFKROHMDTEGPKSSPTYCNQMMKROGMTGSKCPVNTFVHESLADVOAVCSQKNVACKNGQTNQYQSYSTMSITDCRETGSSKYPNCAKTTQANKHIIVACEGNPYVPVHFDA-sv</p> <p><b>Proposed: aliSize=124 (resi) RMSD=1.04 (Å)</b><br/> KETAALKFERQHMDSSSTsAASSSNYCNOQMMKSRNLTkDRCKPVNTFVHESLADVOAVCSQKNVACKNGQTNQYQSYSTMSITDCRETGSSKYPNCAKTTQANKHIIVACEGNPYVPVHFDA-sv<br/> AESSADKFKROHMDTEGPKSSPTYCNQMMKROGMTGSKCPVNTFVHESLADVOAVCSQKNVACKNGQTNQYQSYSTMSITDCRETGSSKYPNCAKTTQANKHIIVACEGNPYVPVHFDA-sv</p>                              |
| 242 | <p><b>1f0vA (124)</b></p> <hr/> <p><b>1ymnA (124)</b></p> | C | 99.19 | <p><b>TM-align: aliSize=115 (resi) RMSD=1.44 (Å)</b><br/> KETAALKFERQHMDSSSTsAASSSNYCNOQMMKSRNLTkDRCKPVNTFVHESLADVOAVCSQKNVACKNGQTNQYQSYSTMSITDCRETGSSKYPNCAKTTQANKHIIVACEGNPYvpvhfdasv-----<br/> KETAALKFERQHMDSSSTsAASSSNYCNOQMMKSRNLTkDRCKPVNTFVHESLADVOAVCSQKNVACKNGQTNQYQSYSTMSITDCRETGSSKYPNCAKTTQANKHIIVACEGNPYvpvhfdasv-----vpvhfdasv</p> <p><b>SARST: aliSize=122 (resi) RMSD=8.88 (Å)</b><br/> k-ETAAAKFERQHMDSSSTsAASSSNYCNOQMMKSRNLTkDRCKPVNTFVHESLADVOAVCSQKNVACKNGQTNQYQSYSTMSITDCRETGSSKYPNCAKTTQANKHIIVACEGNPYVPVHFDA-sv<br/> -kETAALKFERQHMDSSSTsAASSSNYCNOQMMKSRNLTkDRCKPVNTFVHESLADVOAVCSQKNVACKNGQTNQYQSYSTMSITDCRETGSSKYPNCAKTTQANKHIIVACEGNPYVPVHFDA-sv</p> <p><b>BLAST: aliSize=123 (resi) iden=99.19% (123/124) simi=99.19% (123/124)</b><br/> KETAALKFERQHMDSSSTsAASSSNYCNOQMMKSRNLTkDRCKPVNTFVHESLADVOAVCSQKNVACKNGQTNQYQSYSTMSITDCRETGSSKYPNCAKTTQANKHIIVACEGNPYVPVHFDA-sv<br/> KETAALKFERQHMDSSSTsAASSSNYCNOQMMKSRNLTkDRCKPVNTFVHESLADVOAVCSQKNVACKNGQTNQYQSYSTMSITDCRETGSSKYPNCAKTTQANKHIIVACEGNPYVPVHFDA-sv</p> <p><b>Proposed: aliSize=124 (resi) RMSD=0.74 (Å)</b><br/> KETAALKFERQHMDSSSTsAASSSNYCNOQMMKSRNLTkDRCKPVNTFVHESLADVOAVCSQKNVACKNGQTNQYQSYSTMSITDCRETGSSKYPNCAKTTQANKHIIVACEGNPYVPVHFDA-sv<br/> KETAALKFERQHMDSSSTsAASSSNYCNOQMMKSRNLTkDRCKPVNTFVHESLADVOAVCSQKNVACKNGQTNQYQSYSTMSITDCRETGSSKYPNCAKTTQANKHIIVACEGNPYVPVHFDA-sv</p>             |

|     |                                               |   |       |                                                                                                                                                                                                                                                                                                                                                                                                                                                                                                                                                                                                                                                                                                                                                                                                                                                                                                                                                                                                                                                                                                                                                                                                                                                                                                                                                                                                                                                                                                                                                                                                                                                                                                                                                                                                                                                                                                                                                            |
|-----|-----------------------------------------------|---|-------|------------------------------------------------------------------------------------------------------------------------------------------------------------------------------------------------------------------------------------------------------------------------------------------------------------------------------------------------------------------------------------------------------------------------------------------------------------------------------------------------------------------------------------------------------------------------------------------------------------------------------------------------------------------------------------------------------------------------------------------------------------------------------------------------------------------------------------------------------------------------------------------------------------------------------------------------------------------------------------------------------------------------------------------------------------------------------------------------------------------------------------------------------------------------------------------------------------------------------------------------------------------------------------------------------------------------------------------------------------------------------------------------------------------------------------------------------------------------------------------------------------------------------------------------------------------------------------------------------------------------------------------------------------------------------------------------------------------------------------------------------------------------------------------------------------------------------------------------------------------------------------------------------------------------------------------------------------|
| 243 | <p>1f0vA<br/>(124)</p> <p>lymrA<br/>(124)</p> | C | 99.19 | <p><b>TM-align:</b> aliSize=115 (resi) RMSD=1.31 (Å)<br/> KETA<del>AAK</del>FEROHMDSSTSAASSSN<del>Y</del>CN<del>Q</del>MMKSRNLTkDRCKPVNTFVHESLADVOAVCSQKNVACKNGOTNCYQSYSTMSITDCRE<del>T</del>GSSKYPNCAYKTTQANKHIIVACE<del>G</del>NPYvpvhfdasv-----<br/> KETA<del>AAK</del>FEROHMDSSTSAASSSN<del>Y</del>CN<del>Q</del>MMKSRNLTkDRCKPVNTFVHESLADVOAVCSQKNVACKNGOTNCYQSYSTMSITDCRE<del>T</del>GSSKYPNCAYKTTQANKHIIVACE<del>G</del>NPY-----vpvhfdasv</p> <p><b>SARST:</b> aliSize=122 (resi) RMSD=8.86 (Å)<br/> k-ETAAAKFEROHMDSSTSAASSSN<del>Y</del>CN<del>Q</del>MMKSRNLTkDRCKPVNTFVHESLADVOAVCSQKNVACKNGOTNCYQSYSTMSITDCRE<del>T</del>GSSKYPNCAYKTTQANKHIIVACE<del>G</del>NPYPVPVHFDA<del>S</del>-v<br/> -kETAAAKFEROHMDSSTSAASSSN<del>Y</del>CN<del>Q</del>MMKSRNLTkDRCKPVNTFVHESLADVOAVCSQKNVACKNGOTNCYQSYSTMSITDCRE<del>T</del>GSSKYPNCAYKTTQANKHIIVACE<del>G</del>NPYPVPVHFDA<del>S</del>v-</p> <p><b>BLAST:</b> aliSize=123 (resi) iden=99.19% (123/124) simi=99.19% (123/124)<br/> KETA<del>AAK</del>FEROHMDSSTSAASSSN<del>Y</del>CN<del>Q</del>MMKSRNLTkDRCKPVNTFVHESLADVOAVCSQKNVACKNGOTNCYQSYSTMSITDCRE<del>T</del>GSSKYPNCAYKTTQANKHIIVACE<del>G</del>NPYPVPVHFDA<del>S</del><br/> KETA<del>AAK</del>FEROHMDSSTSAASSSN<del>Y</del>CN<del>Q</del>MMKSRNLTkDRCKPVNTFVHESLADVOAVCSQKNVACKNGOTNCYQSYSTMSITDCRE<del>T</del>GSSKYPNCAYKTTQANKHIIVACE<del>G</del>NPYPVPVHFDA<del>S</del></p> <p><b>Proposed:</b> aliSize=124 (resi) RMSD=0.52 (Å)<br/> KETA<del>AAK</del>FEROHMDSSTSAASSSN<del>Y</del>CN<del>Q</del>MMKSRNLTkDRCKPVNTFVHESLADVOAVCSQKNVACKNGOTNCYQSYSTMSITDCRE<del>T</del>GSSKYPNCAYKTTQANKHIIVACE<del>G</del>NPYPVPVHFDA<del>S</del><br/> KETA<del>AAK</del>FEROHMDSSTSAASSSN<del>Y</del>CN<del>Q</del>MMKSRNLTkDRCKPVNTFVHESLADVOAVCSQKNVACKNGOTNCYQSYSTMSITDCRE<del>T</del>GSSKYPNCAYKTTQANKHIIVACE<del>G</del>NPYPVPVHFDA<del>S</del></p>                                                                                            |
| 244 | <p>1f0vA<br/>(124)</p> <p>lymwa<br/>(124)</p> | C | 99.19 | <p><b>TM-align:</b> aliSize=115 (resi) RMSD=1.33 (Å)<br/> KETA<del>AAK</del>FEROHMDSSTSAASSSN<del>Y</del>CN<del>Q</del>MMKSRNLTkDRCKPVNTFVHESLADVOAVCSQKNVACKNGOTNCYQSYSTMSITDCRE<del>T</del>GSSKYPNCAYKTTQANKHIIVACE<del>G</del>NPYvpvhfdasv-----<br/> KETA<del>AAK</del>FEROHMDSSTSAASSSN<del>Y</del>CN<del>Q</del>MMKSRNLTkDRCKPVNTFVHESLADVOAVCSQKNVACKNGOTNCYQSYSTMSITDCRE<del>T</del>GSSKYPNCAYKTTQANKHIIVACE<del>G</del>NPY-----vpvhfdasv</p> <p><b>SARST:</b> aliSize=122 (resi) RMSD=8.85 (Å)<br/> k-ETAAAKFEROHMDSSTSAASSSN<del>Y</del>CN<del>Q</del>MMKSRNLTkDRCKPVNTFVHESLADVOAVCSQKNVACKNGOTNCYQSYSTMSITDCRE<del>T</del>GSSKYPNCAYKTTQANKHIIVACE<del>G</del>NPYPVPVHFDA<del>S</del>-v<br/> -kETAAAKFEROHMDSSTSAASSSN<del>Y</del>CN<del>Q</del>MMKSRNLTkDRCKPVNTFVHESLADVOAVCSQKNVACKNGOTNCYQSYSTMSITDCRE<del>T</del>GSSKYPNCAYKTTQANKHIIVACE<del>G</del>NPYPVPVHFDA<del>S</del>v-</p> <p><b>BLAST:</b> aliSize=123 (resi) iden=99.19% (123/124) simi=99.19% (123/124)<br/> KETA<del>AAK</del>FEROHMDSSTSAASSSN<del>Y</del>CN<del>Q</del>MMKSRNLTkDRCKPVNTFVHESLADVOAVCSQKNVACKNGOTNCYQSYSTMSITDCRE<del>T</del>GSSKYPNCAYKTTQANKHIIVACE<del>G</del>NPYPVPVHFDA<del>S</del><br/> KETA<del>AAK</del>FEROHMDSSTSAASSSN<del>Y</del>CN<del>Q</del>MMKSRNLTkDRCKPVNTFVHESLADVOAVCSQKNVACKNGOTNCYQSYSTMSITDCRE<del>T</del>GSSKYPNCAYKTTQANKHIIVACE<del>G</del>NPYPVPVHFDA<del>S</del></p> <p><b>Proposed:</b> aliSize=124 (resi) RMSD=0.55 (Å)<br/> KETA<del>AAK</del>FEROHMDSSTSAASSSN<del>Y</del>CN<del>Q</del>MMKSRNLTkDRCKPVNTFVHESLADVOAVCSQKNVACKNGOTNCYQSYSTMSITDCRE<del>T</del>GSSKYPNCAYKTTQANKHIIVACE<del>G</del>NPYPVPVHFDA<del>S</del><br/> KETA<del>AAK</del>FEROHMDSSTSAASSSN<del>Y</del>CN<del>Q</del>MMKSRNLTkDRCKPVNTFVHESLADVOAVCSQKNVACKNGOTNCYQSYSTMSITDCRE<del>T</del>GSSKYPNCAYKTTQANKHIIVACE<del>G</del>NPYPVPVHFDA<del>S</del></p>                                                                                            |
| 245 | <p>1f0vA<br/>(124)</p> <p>lyv4A<br/>(104)</p> | C | 26.92 | <p><b>TM-align:</b> aliSize=90 (resi) RMSD=2.44 (Å)<br/> ketAAAK<del>F</del>EROHMDSSTSAASSsn<del>Y</del>CN<del>Q</del>MMKSRNLTkdr<del>C</del>KPVNTFVHESLADVOAVCSQkNvackngq--TNCYQSYSTMSITDCRE<del>T</del>GSSkypn<del>A</del>YKTTQANKHIIVACE<del>G</del>NPYvpvhfdasv-----<br/> ---DWLTFQKKHIT-NT-<del>R</del>DV---D<del>D</del>NILSTNLFH---CKDKNTHIYSRPEPKAICKGIASKG-I-----iASKNVLITSEFYLSDCNVI<del>S</del>SRP---CKYKLLKSTNKFCVTCENQ-----apvhfvgvgsc</p> <p><b>SARST:</b> aliSize=97 (resi) RMSD=9.43 (Å)<br/> keta-AAK<del>F</del>EROHMDSSTSAASSsn<del>Y</del>CN<del>Q</del>MMKSRNLTkdr<del>C</del>KPVNTFVHESLADVOAVCSQKNVACKngqtnCYQSYSTMSITDCRE<del>T</del>GSSkypn<del>A</del>YKTTQANKHIIVACE<del>G</del>NPYPVPVHFDA<del>S</del>----sv<br/> ----dWLT<del>F</del>QKKHITN-<del>R</del>RDV-----CDN<del>I</del>LSTNLFHCKDKNTHIYSRPEPKAICKGIASKG-----NVLITSEFYLSDCNVI<del>S</del>SRPcKYKLLKSTNKFCVTCENQ<del>-</del>-ENQAPVHfVGVGsc--</p> <p><b>BLAST:</b> aliSize=54 (resi) iden=33.01% (34/104) simi=52.43% (54/104)<br/> ketaaak----<del>F</del>EROHMDSSTSAASSsn<del>Y</del>CN<del>Q</del>MMKSRNLTkdr<del>C</del>KPVNTFVHESLADVOAVCSQKNVACKNGOTNcyqsySTMSITDCRE<del>T</del>GSSkypn<del>A</del>YKTTQANKHIIVACE<del>G</del>NPYPVPVHFDA<del>S</del>-----dasv<br/> -----dwl<del>t</del>FQKKHITNTRD<del>V</del>D-----CDN<del>I</del>LSTNLFH--HCKDKNTHIYSRPEPKAICKGIASKNVLIT-----SEFYLSDCNVI<del>S</del>SRP--<del>F</del>-CKYKLLKSTNKFCVTCENQ<del>-</del>-APVHfVGVGsc----</p> <p><b>Proposed:</b> aliSize=97 (resi) RMSD=1.78 (Å)<br/> keTAAAK<del>F</del>EROHMDSSTSAASSsn<del>Y</del>CN<del>Q</del>MMKSRNLTkdr<del>C</del>KPVNTFVHESLADVOAVCS-----qknvackngqtnCYQSYSTMSITDCRE<del>T</del>GSSkypn<del>A</del>YKTTQANKHIIVACE<del>G</del>NPYPVPVHFDA<del>S</del>V--<br/> --PDWLT<del>F</del>QKKHIT-NT-<del>R</del>DV---D<del>D</del>NILSTNLFH--CKDKNTHIYSRPEPKAICKGIASKG-----KNVLITSEFYLSDCNVI<del>S</del>SRP---CKYKLLKSTNKFCVTCENQ<del>-</del>-QAPVHfVGVGsc--</p> |

|     |                                                     |   |        |                                                                                                                                                                                                                                                                                                                                                                                                                                                                                                                                                                                                                                                                                                                                                                                                                                                                                                                                                                                                                                                                                                                                                                                                                                                                                                                                                                                                                                                                                                                                                                                                                                                                                                                                                                                                                                                                                                               |
|-----|-----------------------------------------------------|---|--------|---------------------------------------------------------------------------------------------------------------------------------------------------------------------------------------------------------------------------------------------------------------------------------------------------------------------------------------------------------------------------------------------------------------------------------------------------------------------------------------------------------------------------------------------------------------------------------------------------------------------------------------------------------------------------------------------------------------------------------------------------------------------------------------------------------------------------------------------------------------------------------------------------------------------------------------------------------------------------------------------------------------------------------------------------------------------------------------------------------------------------------------------------------------------------------------------------------------------------------------------------------------------------------------------------------------------------------------------------------------------------------------------------------------------------------------------------------------------------------------------------------------------------------------------------------------------------------------------------------------------------------------------------------------------------------------------------------------------------------------------------------------------------------------------------------------------------------------------------------------------------------------------------------------|
| 246 | <p>1f0vA<br/>(124)</p> <hr/> <p>2aasA<br/>(124)</p> | C | 100.00 | <p><b>TM-align:</b> aliSize=114 (resi) RMSD=1.49 (Å)<br/> KETA<del>AAK</del>FERQHMDSS TSAASSSN<del>Y</del>CN<del>Q</del>MMKSRNLTKDRCKPVNTFVHESLADVOAVCSOKNVACKNGQTNCYQSYSTMSITDCRETGSSKYPNCA<del>Y</del>KTQANKHIIVACE<del>GN</del>PYPVPHFDASV-----<br/> KETA<del>AAK</del>FERQHMDSS TSAASSSN<del>Y</del>CN<del>Q</del>MMKSRNLTKDRCKPVNTFVHESLADVOAVCSOKNVACKNGQTNCYQSYSTMSITDCRETGSSKYPNCA<del>Y</del>KTQANKHIIVACE<del>GN</del>PYPVPHFDASV-----yvpvhfdasv</p> <p><b>SARST:</b> aliSize=122 (resi) RMSD=8.86 (Å)<br/> k-ETAAAKFERQHMDSS TSAASSSN<del>Y</del>CN<del>Q</del>MMKSRNLTKDRCKPVNTFVHESLADVOAVCSOKNVACKNGQTNCYQSYSTMSITDCRETGSSKYPNCA<del>Y</del>KTQANKHIIVACE<del>GN</del>PYPVPHFDASV-----v<br/> -kETAAAKFERQHMDSS TSAASSSN<del>Y</del>CN<del>Q</del>MMKSRNLTKDRCKPVNTFVHESLADVOAVCSOKNVACKNGQTNCYQSYSTMSITDCRETGSSKYPNCA<del>Y</del>KTQANKHIIVACE<del>GN</del>PYPVPHFDASV-----v</p> <p><b>BLAST:</b> aliSize=124 (resi) iden=100.00% (124/124) simi=100.00% (124/124)<br/> KETA<del>AAK</del>FERQHMDSS TSAASSSN<del>Y</del>CN<del>Q</del>MMKSRNLTKDRCKPVNTFVHESLADVOAVCSOKNVACKNGQTNCYQSYSTMSITDCRETGSSKYPNCA<del>Y</del>KTQANKHIIVACE<del>GN</del>PYPVPHFDASV-----<br/> KETA<del>AAK</del>FERQHMDSS TSAASSSN<del>Y</del>CN<del>Q</del>MMKSRNLTKDRCKPVNTFVHESLADVOAVCSOKNVACKNGQTNCYQSYSTMSITDCRETGSSKYPNCA<del>Y</del>KTQANKHIIVACE<del>GN</del>PYPVPHFDASV-----</p> <p><b>Proposed:</b> aliSize=124 (resi) RMSD=1.13 (Å)<br/> KETA<del>AAK</del>FERQHMDSS TSAASSSN<del>Y</del>CN<del>Q</del>MMKSRNLTKDRCKPVNTFVHESLADVOAVCSOKNVACKNGQTNCYQSYSTMSITDCRETGSSKYPNCA<del>Y</del>KTQANKHIIVACE<del>GN</del>PYPVPHFDASV-----<br/> KETA<del>AAK</del>FERQHMDSS TSAASSSN<del>Y</del>CN<del>Q</del>MMKSRNLTKDRCKPVNTFVHESLADVOAVCSOKNVACKNGQTNCYQSYSTMSITDCRETGSSKYPNCA<del>Y</del>KTQANKHIIVACE<del>GN</del>PYPVPHFDASV-----</p>                                                                         |
| 247 | <p>1f0vA<br/>(124)</p> <hr/> <p>2e0jA<br/>(128)</p> | C | 70.16  | <p><b>TM-align:</b> aliSize=114 (resi) RMSD=1.65 (Å)<br/> KETA<del>AAK</del>FERQHMDSS TSAASSSN<del>Y</del>CN<del>Q</del>MMKSRNLTKDRCKPVNTFVHESLADVOAVCSOKNVACKNGQTNCYQSYSTMSITDCRETGSSKYPNCA<del>Y</del>KTQANKHIIVACE<del>GN</del>PYPVPHFDASV-----<br/> KESRAK<del>K</del>FERQHMDSS SPSS-SS<del>T</del>YCN<del>Q</del>MLLRNMTQGRCKPVNTFVHEPLVDVQNVCFJEKVTCKNGGNCYKNS<del>S</del>SMHITDCRLNGSRYPNCA<del>Y</del>RTSPKERHIIVACE<del>GN</del>PYPVPHFDASV-----vpvhfdasvedst</p> <p><b>SARST:</b> aliSize=122 (resi) RMSD=8.84 (Å)<br/> k-ETAAAKFERQHMDSS TSAASSSN<del>Y</del>CN<del>Q</del>MMKSRNLTKDRCKPVNTFVHESLADVOAVCSOKNVACKNGQTNCYQSYSTMSITDCRETGSSKYPNCA<del>Y</del>KTQANKHIIVACE<del>GN</del>PYPVPHFDASV-----v<br/> -kESRAK<del>K</del>FERQHMDSS SPSS-SS<del>T</del>YCN<del>Q</del>MLLRNMTQGRCKPVNTFVHEPLVDVQNVCFJEKVTCKNGGNCYKNS<del>S</del>SMHITDCRLNGSRYPNCA<del>Y</del>RTSPKERHIIVACE<del>GN</del>PYPVPHFDASV-----vedst</p> <p><b>BLAST:</b> aliSize=101 (resi) iden=70.16% (87/124) simi=81.45% (101/124)<br/> KETA<del>AAK</del>FERQHMDSS TSAASSSN<del>Y</del>CN<del>Q</del>MMKSRNLTKDRCKPVNTFVHESLADVOAVCSOKNVACKNGQTNCYQSYSTMSITDCRETGSSKYPNCA<del>Y</del>KTQANKHIIVACE<del>GN</del>PYPVPHFDASV-----<br/> KESRAK<del>K</del>FERQHMDSS SPSS-SS<del>T</del>YCN<del>Q</del>MLLRNMTQGRCKPVNTFVHEPLVDVQNVCFJEKVTCKNGGNCYKNS<del>S</del>SMHITDCRLNGSRYPNCA<del>Y</del>RTSPKERHIIVACE<del>GN</del>PYPVPHFDASV-----edst</p> <p><b>Proposed:</b> aliSize=124 (resi) RMSD=1.13 (Å)<br/> KETA<del>AAK</del>FERQHMDSS TSAASSSN<del>Y</del>CN<del>Q</del>MMKSRNLTKDRCKPVNTFVHESLADVOAVCSOKNVACKNGQTNCYQSYSTMSITDCRETGSSKYPNCA<del>Y</del>KTQANKHIIVACE<del>GN</del>PYPVPHFDASV-----<br/> KESRAK<del>K</del>FERQHMDSS SPSS-SS<del>T</del>YCN<del>Q</del>MLLRNMTQGRCKPVNTFVHEPLVDVQNVCFJEKVTCKNGGNCYKNS<del>S</del>SMHITDCRLNGSRYPNCA<del>Y</del>RTSPKERHIIVACE<del>GN</del>PYPVPHFDASV-----edst</p>              |
| 248 | <p>1f0vA<br/>(124)</p> <hr/> <p>2e0lA<br/>(128)</p> | C | 69.35  | <p><b>TM-align:</b> aliSize=115 (resi) RMSD=1.47 (Å)<br/> KETA<del>AAK</del>FERQHMDSS TSAASSSN<del>Y</del>CN<del>Q</del>MMKSRNLTKDRCKPVNTFVHESLADVOAVCSOKNVACKNGQTNCYQSYSTMSITDCRETGSSKYPNCA<del>Y</del>KTQANKHIIVACE<del>GN</del>PYPVPHFDASV-----<br/> KESRAK<del>K</del>FERQHMDSS SPSS-SS<del>T</del>YCN<del>Q</del>MLLRNMTQGRCKPVNTFVHEPLVDVQNVCFJEKVTCKNGGNCYKNS<del>S</del>SMHITDCRLNGSRYPNCA<del>Y</del>RTSPKERHIIVACE<del>GN</del>PYPVPHFDASV-----vpvhfdasvedst</p> <p><b>SARST:</b> aliSize=121 (resi) RMSD=8.87 (Å)<br/> ke--TAAAKFERQHMDSS TSAASSSN<del>Y</del>CN<del>Q</del>MMKSRNLTKDRCKPVNTFVHESLADVOAVCSOKNVACKNGQTNCYQSYSTMSITDCRETGSSKYPNCA<del>Y</del>KTQANKHIIVACE<del>GN</del>PYPVPHFDASV-----v<br/> --keSR<del>A</del>K<del>K</del>FERQHMDSS SPSS-SS<del>T</del>YCN<del>Q</del>MLLRNMTQGRCKPVNTFVHEPLVDVQNVCFJEKVTCKNGGNCYKNS<del>S</del>SMHITDCRLNGSRYPNCA<del>Y</del>RTSPKERHIIVACE<del>GN</del>PYPVPHFDASV-----vedst</p> <p><b>BLAST:</b> aliSize=100 (resi) iden=69.35% (86/124) simi=80.65% (100/124)<br/> KETA<del>AAK</del>FERQHMDSS TSAASSSN<del>Y</del>CN<del>Q</del>MMKSRNLTKDRCKPVNTFVHESLADVOAVCSOKNVACKNGQTNCYQSYSTMSITDCRETGSSKYPNCA<del>Y</del>KTQANKHIIVACE<del>GN</del>PYPVPHFDASV-----<br/> KESRAK<del>K</del>FERQHMDSS SPSS-SS<del>T</del>YCN<del>Q</del>MLLRNMTQGRCKPVNTFVHEPLVDVQNVCFJEKVTCKNGGNCYKNS<del>S</del>SMHITDCRLNGSRYPNCA<del>Y</del>RTSPKERHIIVACE<del>GN</del>PYPVPHFDASV-----edst</p> <p><b>Proposed:</b> aliSize=124 (resi) RMSD=0.86 (Å)<br/> KETA<del>AAK</del>FERQHMDSS TSAASSSN<del>Y</del>CN<del>Q</del>MMKSRNLTKDRCKPVNTFVHESLADVOAVCSOKNVACKNGQTNCYQSYSTMSITDCRETGSSKYPNCA<del>Y</del>KTQANKHIIVACE<del>GN</del>PYPVPHFDASV-----<br/> KESRAK<del>K</del>FERQHMDSS SPSS-SS<del>T</del>YCN<del>Q</del>MLLRNMTQGRCKPVNTFVHEPLVDVQNVCFJEKVTCKNGGNCYKNS<del>S</del>SMHITDCRLNGSRYPNCA<del>Y</del>RTSPKERHIIVACE<del>GN</del>PYPVPHFDASV-----edst</p> |

|     |                                                     |   |       |                                                                                                                                                                                                                                                                                                                                                                                                                                                                                                                                                                                                                                                                                                                                                                                                                                                                                                                                                                                                                                                                                                                                                                                                                                                                                                                                                                          |
|-----|-----------------------------------------------------|---|-------|--------------------------------------------------------------------------------------------------------------------------------------------------------------------------------------------------------------------------------------------------------------------------------------------------------------------------------------------------------------------------------------------------------------------------------------------------------------------------------------------------------------------------------------------------------------------------------------------------------------------------------------------------------------------------------------------------------------------------------------------------------------------------------------------------------------------------------------------------------------------------------------------------------------------------------------------------------------------------------------------------------------------------------------------------------------------------------------------------------------------------------------------------------------------------------------------------------------------------------------------------------------------------------------------------------------------------------------------------------------------------|
| 249 | <p>1f0vA<br/>(124)</p> <hr/> <p>2e0mA<br/>(128)</p> | C | 69.35 | <p><b>TM-align:</b> aliSize=115 (resi) RMSD=1.47 (Å)<br/> KETAIAKFEROHMDSSTAAASSNYCNQMMKSRNLTDRCKPVNTFVHESLADVOAVCSOKNACKNGQTNCYQSYSTMSITDCRELGSSKYPNCAYKTTQANKHIIVACEGNPYvpvhfdasv-----<br/> KESRAKFKFOROHMDSDSPPSSSLYCNLMMLLRNMTQGRCKPVNTFVHEPLVDVQNVCFQEKVTCKNGGNCYKSNSSMHI TDCRLINGSRYPNCAYRTSPKERHIIVACEGSPY-----vpvhfdasvedst</p> <p><b>SARST:</b> aliSize=121 (resi) RMSD=8.87 (Å)<br/> ke--TAAKFEROHMDSSTAAASSNYCNQMMKSRNLTDRCKPVNTFVHESLADVOAVCSOKNACKNGQTNCYQSYSTMSITDCRELGSSKYPNCAYKTTQANKHIIVACEGNPYVPVHFDAS-----v<br/> --keSRKFKFOROHMDSDSPPSSSLYCNLMMLLRNMTQGRCKPVNTFVHEPLVDVQNVCFQEKVTCKNGGNCYKSNSSMHI TDCRLINGSRYPNCAYRTSPKERHIIVACEGSPYVPVHFDASvedst-</p> <p><b>BLAST:</b> aliSize=100 (resi) iden=69.35% (86/124) simi=80.65% (100/124)<br/> KETAIAKFEROHMDSSTAAASSNYCNQMMKSRNLTDRCKPVNTFVHESLADVOAVCSOKNACKNGQTNCYQSYSTMSITDCRELGSSKYPNCAYKTTQANKHIIVACEGNPYVPVHFDASV----<br/> KESRAKFKFOROHMDSDSPPSSSLYCNLMMLLRNMTQGRCKPVNTFVHEPLVDVQNVCFQEKVTCKNGGNCYKSNSSMHI TDCRLINGSRYPNCAYRTSPKERHIIVACEGSPYVPVHFDASVedst</p> <p><b>Proposed:</b> aliSize=124 (resi) RMSD=0.85 (Å)<br/> KETAIAKFEROHMDSSTAAASSNYCNQMMKSRNLTDRCKPVNTFVHESLADVOAVCSOKNACKNGQTNCYQSYSTMSITDCRELGSSKYPNCAYKTTQANKHIIVACEGNPYVPVHFDASV----<br/> KESRAKFKFOROHMDSDSPPSSSLYCNLMMLLRNMTQGRCKPVNTFVHEPLVDVQNVCFQEKVTCKNGGNCYKSNSSMHI TDCRLINGSRYPNCAYRTSPKERHIIVACEGSPYVPVHFDASVedst</p> |
| 250 | <p>1f0vA<br/>(124)</p> <hr/> <p>2e0oA<br/>(126)</p> | C | 68.55 | <p><b>TM-align:</b> aliSize=114 (resi) RMSD=1.52 (Å)<br/> KETAIAKFEROHMDSSTsAAASS-SNYCNQMMKSRNLTDRCKPVNTFVHESLADVOAVCSOKNACKNGQTNCYQSYSTMSITDCRELGSSKYPNCAYKTTQANKHIIVACEGNPYvpvhfdasv-----<br/> KESRAKFKFOROHMDSDS-SPSSsSTYCNQMMRRRNMTQGRCKPVNTFVHEPLLVQLVQLQEKVTCKNGGNCYKSNSSMHI TDCRLINGSRYPNCAYRTSPKERHIIVACEGSPY-----vpvhfdasved</p> <p><b>SARST:</b> aliSize=122 (resi) RMSD=8.81 (Å)<br/> k--TAAKFEROHMDSSTsAAASS-SNYCNQMMKSRNLTDRCKPVNTFVHESLADVOAVCSOKNACKNGQTNCYQSYSTMSITDCRELGSSKYPNCAYKTTQANKHIIVACEGNPYVPVHFDAS----v<br/> -kSRKFKFOROHMDSDS-SPSSsSTYCNQMMRRRNMTQGRCKPVNTFVHEPLLVQLVQLQEKVTCKNGGNCYKSNSSMHI TDCRLINGSRYPNCAYRTSPKERHIIVACEGSPYVPVHFDASved-</p> <p><b>BLAST:</b> aliSize=101 (resi) iden=69.35% (86/124) simi=81.45% (101/124)<br/> KETAIAKFEROHMDSSTsAAASS-SNYCNQMMKSRNLTDRCKPVNTFVHESLADVOAVCSOKNACKNGQTNCYQSYSTMSITDCRELGSSKYPNCAYKTTQANKHIIVACEGNPYVPVHFDASV--<br/> KESRAKFKFOROHMDSDS-SPSSsSTYCNQMMRRRNMTQGRCKPVNTFVHEPLLVQLVQLQEKVTCKNGGNCYKSNSSMHI TDCRLINGSRYPNCAYRTSPKERHIIVACEGSPYVPVHFDASVed</p> <p><b>Proposed:</b> aliSize=123 (resi) RMSD=0.92 (Å)<br/> KETAIAKFEROHMDSSTsAAASS-SNYCNQMMKSRNLTDRCKPVNTFVHESLADVOAVCSOKNACKNGQTNCYQSYSTMSITDCRELGSSKYPNCAYKTTQANKHIIVACEGNPYVPVHFDASV--<br/> KESRAKFKFOROHMDSDS-SPSSsSTYCNQMMRRRNMTQGRCKPVNTFVHEPLLVQLVQLQEKVTCKNGGNCYKSNSSMHI TDCRLINGSRYPNCAYRTSPKERHIIVACEGSPYVPVHFDASVed</p> |
| 251 | <p>1f0vA<br/>(124)</p> <hr/> <p>2e0oB<br/>(125)</p> | C | 69.35 | <p><b>TM-align:</b> aliSize=115 (resi) RMSD=1.61 (Å)<br/> -KETAIAKFEROHMDSSTsAAASSNYCNQMMKSRNLTDRCKPVNTFVHESLADVOAVCSOKNACKNGQTNCYQSYSTMSITDCRELGSSKYPNCAYKTTQANKHIIVACEGNPYvpvhfdasv-----<br/> mKESRAKFKFOROHMDSDSPPSSSSTYCNQMMRRRNMTQGRCKPVNTFVHEPLLVQLVQLQEKVTCKNGGNCYKSNSSMHI TDCRLINGSRYPNCAYRTSPKERHIIVACEGSPY-----vpvhfdasv</p> <p><b>SARST:</b> aliSize=122 (resi) RMSD=8.85 (Å)<br/> k--TAAKFEROHMDSSTsAAASSNYCNQMMKSRNLTDRCKPVNTFVHESLADVOAVCSOKNACKNGQTNCYQSYSTMSITDCRELGSSKYPNCAYKTTQANKHIIVACEGNPYVPVHFDAS--v<br/> -mkSRKFKFOROHMDSDSPPSSSSTYCNQMMRRRNMTQGRCKPVNTFVHEPLLVQLVQLQEKVTCKNGGNCYKSNSSMHI TDCRLINGSRYPNCAYRTSPKERHIIVACEGSPYVPVHFDASv-</p> <p><b>BLAST:</b> aliSize=101 (resi) iden=69.35% (86/124) simi=81.45% (101/124)<br/> -KETAIAKFEROHMDSSTsAAASSNYCNQMMKSRNLTDRCKPVNTFVHESLADVOAVCSOKNACKNGQTNCYQSYSTMSITDCRELGSSKYPNCAYKTTQANKHIIVACEGNPYVPVHFDASV<br/> mKESRAKFKFOROHMDSDSPPSSSSTYCNQMMRRRNMTQGRCKPVNTFVHEPLLVQLVQLQEKVTCKNGGNCYKSNSSMHI TDCRLINGSRYPNCAYRTSPKERHIIVACEGSPYVPVHFDASV</p> <p><b>Proposed:</b> aliSize=124 (resi) RMSD=1.01 (Å)<br/> -KETAIAKFEROHMDSSTsAAASSNYCNQMMKSRNLTDRCKPVNTFVHESLADVOAVCSOKNACKNGQTNCYQSYSTMSITDCRELGSSKYPNCAYKTTQANKHIIVACEGNPYVPVHFDASV<br/> mKESRAKFKFOROHMDSDSPPSSSSTYCNQMMRRRNMTQGRCKPVNTFVHEPLLVQLVQLQEKVTCKNGGNCYKSNSSMHI TDCRLINGSRYPNCAYRTSPKERHIIVACEGSPYVPVHFDASV</p>                    |

|     |                                             |   |       |                                                                                                                                                                                                                                                                                                                                                                                                                                                                                                                                                                                                                                                                                                                                                                                                                                                                                                                                                                                                                                                                                                                                                                                                                                                                                                                                                                                                                                                                                           |
|-----|---------------------------------------------|---|-------|-------------------------------------------------------------------------------------------------------------------------------------------------------------------------------------------------------------------------------------------------------------------------------------------------------------------------------------------------------------------------------------------------------------------------------------------------------------------------------------------------------------------------------------------------------------------------------------------------------------------------------------------------------------------------------------------------------------------------------------------------------------------------------------------------------------------------------------------------------------------------------------------------------------------------------------------------------------------------------------------------------------------------------------------------------------------------------------------------------------------------------------------------------------------------------------------------------------------------------------------------------------------------------------------------------------------------------------------------------------------------------------------------------------------------------------------------------------------------------------------|
| 252 | <p>1f0vA (124)</p> <hr/> <p>2hkyA (129)</p> | C | 41.13 | <p><b>TM-align:</b> aliSize=104 (resi) RMSD=2.46 (Å)<br/> --K--EIAAAKFERQHMDSSsTsAAsssnYCNQMMKSRNLTKD--DRCKPVNTFVHESLADVQAVCSQKNVACKNG-QTNCYQSYSTMSITDCREIGSSKYPNCAYKTTQANKHIIIVACEGNp-----Yvpvhfdasv-----<br/> mkPkgMSSQWFKIQHMOPSP--Q----ACNSAMK--NINKhtKRCKDLNTEFLHEPFSSAATQTPKIAC-KNgDKNCHOSHGPVSLTMCKLI-SGKYPNCRKYEKRONKSYVVACKPP-qkkdsqqfH-----lvpvhldrvi</p> <p><b>SARST:</b> aliSize=100 (resi) RMSD=4.51 (Å)<br/> keta-----AAKFERQHMDSSsTsAAsssnYCNQMMKSRNLTKD--DRCKPVNTFVHESLADVQAVCSQKNVACKNG-QTNCYQSYSTMSITDCRE---TGs skyPNCAYKTTQANKHIIIVACEGNPY-----vvpvhfdasv<br/> ---mkpkgmtSSQWFKIQHMOPSPQAC-NSAMKNINHTK---RCKDLNTEFLHEPFSSAATQTPKIACKNGDKNCHOSHGPVSLTMCKLIsgKY---PNCRYKYEKRONKSYV--VACKPPqkkdsqqfHlvpvhldrvi-----</p> <p><b>BLAST:</b> aliSize=71 (resi) iden=43.55% (54/124) simi=57.26% (71/124)<br/> ke-----TAAAKFERQHMDSSsTsAAsssnYCNQMMKSRNLTKD--DRCKPVNTFVHESLADVQAVCSQKNVACKNG-QTNCYQSYSTMSITDCREIGSSKYPNCAYKTTQANKHIIIVACE-----EGNPY--VPVHF---asv<br/> ---mkpkgmtSSQWFKIQHMOPSPQAC-NSAMKNINHTK---RCKDLNTEFLHEPFSSAATQTPKIACKNGDKNCHOSHGPVSLTMCKLI-SGKYPNCRKYEKRONKSYVVACKppqkkDSQOFhIvPVHLrvi---</p> <p><b>Proposed:</b> aliSize=112 (resi) RMSD=1.80 (Å)<br/> --K--EIAAAKFERQHMDSS--tsaasssnYCNQMMKSRNLTKD--DRCKPVNTFVHESLADVQAVCSQKNVACKNG-QTNCYQSYSTMSITDCREIGSSKYPNCAYKTTQANKHIIIVACEGN-----P-YVPVHF-DASV<br/> mkPkgMSSQWFKIQHMOPSPq-----ACNSAMK--NINKhtKRCKDLNTEFLHEPFSSAATQTPKIAC-KNgDKNCHOSHGPVSLTMCKLI-SGKYPNCRKYEKRONKSYVVACKPPqkkdsqqfHlVPVHLDRVL</p> |
| 253 | <p>1f0vA (124)</p> <hr/> <p>2i5sX (104)</p> | C | 27.88 | <p><b>TM-align:</b> aliSize=90 (resi) RMSD=2.38 (Å)<br/> ketAAAKFERQHMDSSsTsAAsssnYCNQMMKSRNLTKD--DRCKPVNTFVHESLADVQAVCSQKNVACKNG-QTNCYQSYSTMSITDCREIGSSKYPNCAYKTTQANKHIIIVACEGNpyvpvhfdasv-----<br/> ---DWLTFQKKHIT-NT-RDV---DNDNIMSTNLFH---CKDKNTHIYSRPEPKAICKGIASK-----NVLITSEFYLSDCNVTIS--RPC--KYLKSTNKFCVTCENQ-----apvhfvgvgsc</p> <p><b>SARST:</b> aliSize=99 (resi) RMSD=10.62 (Å)<br/> keta-AAKFERQHMDSSsTsAASSSNYCNQMMKSRNLTKD--DRCKPVNTFVHESLADVQAVCSQKNVACKNG-QTNCYQSYSTMSITDCREIGSSKYPNCAYKTTQANKHIIIVACEGNPYVPVHF-DAS---v<br/> ---dwlTFQKKHIT-NT-RDV---DNDNIMSTNLFH---CKDKNTHIYSRPEPKAICKGIASK-----NVLITSEFYLSDCNVTIS--RPC--KYLKSTNKFCVTCENQ--ENQAPVHFVGVGsc-</p> <p><b>BLAST:</b> aliSize=54 (resi) iden=33.98% (35/104) simi=52.43% (54/104)<br/> ketaaak----FERQHMDSSsTsAASSSNYCNQMMKSRNLTKD--DRCKPVNTFVHESLADVQAVCSQKNVACKNG-QTNCYQSYSTMSITDCREIGSSKYPNCAYKTTQANKHIIIVACEGNpyVPVHF-----dasv<br/> -----dwlTFQKKHIT-NT-RDV---DNDNIMSTNLFH---CKDKNTHIYSRPEPKAICKGIASK-----NVLITSEFYLSDCNVTIS--RPC--KYLKSTNKFCVTCENQ--APVHFVGVGsc----</p> <p><b>Proposed:</b> aliSize=97 (resi) RMSD=1.75 (Å)<br/> keTAAAKFERQHMDSSsTsAASSSNYCNQMMKSRNLTKD--DRCKPVNTFVHESLADVQAVCS-----qknvackngqtNCYQSYSTMSITDCREIGSSKYPNCAYKTTQANKHIIIVACEGNpyVPVHF-DASV--<br/> --PDWLTQKKHIT-NT-RDV---DNDNIMSTNLFH---CKDKNTHIYSRPEPKAICKGIASK-----NVLITSEFYLSDCNVTIS--RPC--KYLKSTNKFCVTCENQ--QAPVHFVGVGsc</p>                                                                                             |
| 254 | <p>1f0vA (124)</p> <hr/> <p>2k11A (127)</p> | C | 69.35 | <p><b>TM-align:</b> aliSize=114 (resi) RMSD=1.95 (Å)<br/> KETAAAKFERQHMDSSsTsAASSSNYCNQMMKSRNLTKD--DRCKPVNTFVHESLADVQAVCSQKNVACKNG-QTNCYQSYSTMSITDCREIGSSKYPNCAYKTTQANKHIIIVACEGNpyvpvhfdasv-----<br/> KESRAKFKFQROHMDSDSSPSSSTYCNQMMRRRNMTOGRCKPVNTFVHEPLVDVQNVCFQEKVTCKNGGCGCYKSNSSMHIIDCRLINGSRYPNCAYRTSPKERHIIIVACEGSP-----yvpvhfdasveds</p> <p><b>SARST:</b> aliSize=121 (resi) RMSD=8.10 (Å)<br/> k-ETAAAKFERQHMDSSsTsAASSSNYCNQMMKSRNLTKD--DRCKPVNTFVHESLADVQAVCSQKNVACKNG-QTNCYQSYSTMSITDCREIGSSKYPNCAYKTTQANKHIIIVACEGNPYVPVHFDA-----sv<br/> -kESRAKFKFQROHMDSDSSPSSSTYCNQMMRRRNMTOGRCKPVNTFVHEPLVDVQNVCFQEKVTCKNGGCGCYKSNSSMHIIDCRLINGSRYPNCAYRTSPKERHIIIVACEGSPYVPVHFDAsveds--</p> <p><b>BLAST:</b> aliSize=102 (resi) iden=70.16% (87/124) simi=82.26% (102/124)<br/> KETAAAKFERQHMDSSsTsAASSSNYCNQMMKSRNLTKD--DRCKPVNTFVHESLADVQAVCSQKNVACKNG-QTNCYQSYSTMSITDCREIGSSKYPNCAYKTTQANKHIIIVACEGNPYVPVHF-DASV---<br/> KESRAKFKFQROHMDSDSSPSSSTYCNQMMRRRNMTOGRCKPVNTFVHEPLVDVQNVCFQEKVTCKNGGCGCYKSNSSMHIIDCRLINGSRYPNCAYRTSPKERHIIIVACEGSPYVPVHF-DASVeds</p> <p><b>Proposed:</b> aliSize=123 (resi) RMSD=1.56 (Å)<br/> k-ETAAAKFERQHMDSSsTsAASSSNYCNQMMKSRNLTKD--DRCKPVNTFVHESLADVQAVCSQKNVACKNG-QTNCYQSYSTMSITDCREIGSSKYPNCAYKTTQANKHIIIVACEGNPYVPVHF-DASV---<br/> -kESRAKFKFQROHMDSDSSPSSSTYCNQMMRRRNMTOGRCKPVNTFVHEPLVDVQNVCFQEKVTCKNGGCGCYKSNSSMHIIDCRLINGSRYPNCAYRTSPKERHIIIVACEGSPYVPVHF-DASVeds</p>                                                                         |

|     |                                                     |   |                                                                                                                                                                                                                                                                                                                                                                                                                                                                                                                                                                                                                                                                                                                                                                                                                                                                                                                                                                                                                                                                                                                                                                                                                                                                                                                                                                                                                                                                                                                                                                                                                                                                                                                                                                                                                                                                                                                                                                                                                                                                                                                                                                                                                                                                                                                                                                                                                                                                                                                                                                                                                                                                                                                                                                                                                                                                                                                                                |
|-----|-----------------------------------------------------|---|------------------------------------------------------------------------------------------------------------------------------------------------------------------------------------------------------------------------------------------------------------------------------------------------------------------------------------------------------------------------------------------------------------------------------------------------------------------------------------------------------------------------------------------------------------------------------------------------------------------------------------------------------------------------------------------------------------------------------------------------------------------------------------------------------------------------------------------------------------------------------------------------------------------------------------------------------------------------------------------------------------------------------------------------------------------------------------------------------------------------------------------------------------------------------------------------------------------------------------------------------------------------------------------------------------------------------------------------------------------------------------------------------------------------------------------------------------------------------------------------------------------------------------------------------------------------------------------------------------------------------------------------------------------------------------------------------------------------------------------------------------------------------------------------------------------------------------------------------------------------------------------------------------------------------------------------------------------------------------------------------------------------------------------------------------------------------------------------------------------------------------------------------------------------------------------------------------------------------------------------------------------------------------------------------------------------------------------------------------------------------------------------------------------------------------------------------------------------------------------------------------------------------------------------------------------------------------------------------------------------------------------------------------------------------------------------------------------------------------------------------------------------------------------------------------------------------------------------------------------------------------------------------------------------------------------------|
| 255 | <p>1f0vA<br/>(124)</p> <hr/> <p>2nuiA<br/>(124)</p> | C | <p>99.19</p> <p><b>TM-align:</b> aliSize=114 (resi) RMSD=0.95 (Å)<br/> KETA<del>AAAK</del>FEROH<del>MD</del>SSTSA<del>ASS</del>SNYC<del>NQ</del>MMKSRNLTKDR<del>CK</del>PVNTFVHESLADVOAVCSQKNVACKNGOTNCYQSYSTMSITD<del>CRE</del>TGSSKYPNCAYKTTQANKHIIVACE<del>GN</del>Pyvpvhf<del>dasv</del>-----<br/> KETA<del>AAAK</del>FEROH<del>MD</del>SSTSA<del>ASS</del>SNYC<del>NQ</del>MMKSRNLTKDR<del>CK</del>PVNTFVHESLADVOAVCSQKNVACKNGOTNCYQSYSTMSITD<del>CRE</del>TGSSKYPNCAYKTTQANKHIIVACE<del>GN</del>Pyvpvhf<del>dasv</del>-----yvpvhf<del>dasv</del></p> <p><b>SARST:</b> aliSize=122 (resi) RMSD=8.86 (Å)<br/> k-<del>E</del>TAAAKFEROH<del>MD</del>SSTSA<del>ASS</del>SNYC<del>NQ</del>MMKSRNLTKDR<del>CK</del>PVNTFVHESLADVOAVCSQKNVACKNGOTNCYQSYSTMSITD<del>CRE</del>TGSSKYPNCAYKTTQANKHIIVACE<del>GN</del>PyVPVHFDAS<del>-v</del><br/> -k<del>E</del>TAAAKFEROH<del>MD</del>SSTSA<del>ASS</del>SNYC<del>NQ</del>MMKSRNLTKDR<del>CK</del>PVNTFVHESLADVOAVCSQKNVACKNGOTNCYQSYSTMSITD<del>CRE</del>TGSSKYPNCAYKTTQANKHIIVACE<del>GN</del>PyVPVHFDAS<del>v-</del></p> <p><b>BLAST:</b> aliSize=123 (resi) iden=99.19% (123/124) simi=99.19% (123/124)<br/> KETA<del>AAAK</del>FEROH<del>MD</del>SSTSA<del>ASS</del>SNYC<del>NQ</del>MMKSRNLTKDR<del>CK</del>PVNTFVHESLADVOAVCSQKNVACKNGOTNCYQSYSTMSITD<del>CRE</del>TGSSKYPNCAYKTTQANKHIIVACE<del>GN</del>PyVPVHFDASV<br/> KETA<del>AAAK</del>FEROH<del>MD</del>SSTSA<del>ASS</del>SNYC<del>NQ</del>MMKSRNLTKDR<del>CK</del>PVNTFVHESLADVOAVCSQKNVACKNGOTNCYQSYSTMSITD<del>CRE</del>TGSSKYPNCAYKTTQANKHIIVACE<del>GN</del>PyVPVHFDASV</p> <p><b>Proposed:</b> aliSize=124 (resi) RMSD=0.52 (Å)<br/> KETA<del>AAAK</del>FEROH<del>MD</del>SSTSA<del>ASS</del>SNYC<del>NQ</del>MMKSRNLTKDR<del>CK</del>PVNTFVHESLADVOAVCSQKNVACKNGOTNCYQSYSTMSITD<del>CRE</del>TGSSKYPNCAYKTTQANKHIIVACE<del>GN</del>PyVPVHFDASV<br/> KETA<del>AAAK</del>FEROH<del>MD</del>SSTSA<del>ASS</del>SNYC<del>NQ</del>MMKSRNLTKDR<del>CK</del>PVNTFVHESLADVOAVCSQKNVACKNGOTNCYQSYSTMSITD<del>CRE</del>TGSSKYPNCAYKTTQANKHIIVACE<del>GN</del>PyVPVHFDASV</p>                                                                                                                                                                                                                                                                                                                                                                                                                                                                                                                                                                                                                                                                                                                                                                                                                                                          |
| 256 | <p>1f0vA<br/>(124)</p> <hr/> <p>2op2A<br/>(124)</p> | C | <p>98.39</p> <p><b>TM-align:</b> aliSize=115 (resi) RMSD=1.40 (Å)<br/> KETA<del>AAAK</del>FEROH<del>MD</del>SSTSA<del>ASS</del>SNYC<del>NQ</del>MMKSRNLTKDR<del>CK</del>PVNTFVHESLADVOAVCSQKNVACKNGOTNCYQSYSTMSITD<del>CRE</del>TGSSKYPNCAYKTTQANKHIIVACE<del>GN</del>Pyvpvhf<del>dasv</del>-----<br/> KETA<del>AAAK</del>FEROH<del>MD</del>SSTSA<del>ASS</del>SNYC<del>NQ</del>MMKSRNLTKDR<del>CK</del>PVNTFVHESLADVOAVCSQKNVACKNGOTNCYQSYSTMSITD<del>CRE</del>TGSSKYPNCAYKTTQANKHIIVACE<del>GN</del>Pyvpvhf<del>dasv</del>-----vpvhf<del>dasv</del></p> <p><b>SARST:</b> aliSize=122 (resi) RMSD=8.79 (Å)<br/> k-<del>E</del>TAAAKFEROH<del>MD</del>SSTSA<del>ASS</del>SNYC<del>NQ</del>MMKSRNLTKDR<del>CK</del>PVNTFVHESLADVOAVCSQKNVACKNGOTNCYQSYSTMSITD<del>CRE</del>TGSSKYPNCAYKTTQANKHIIVACE<del>GN</del>PyVPVHFDAS<del>-v</del><br/> -k<del>E</del>TAAAKFEROH<del>MD</del>SSTSA<del>ASS</del>SNYC<del>NQ</del>MMKSRNLTKDR<del>CK</del>PVNTFVHESLADVOAVCSQKNVACKNGOTNCYQSYSTMSITD<del>CRE</del>TGSSKYPNCAYKTTQANKHIIVACE<del>GN</del>PyVPVHFDAS<del>v-</del></p> <p><b>BLAST:</b> aliSize=122 (resi) iden=98.39% (122/124) simi=98.39% (122/124)<br/> KETA<del>AAAK</del>FEROH<del>MD</del>SSTSA<del>ASS</del>SNYC<del>NQ</del>MMKSRNLTKDR<del>CK</del>PVNTFVHESLADVOAVCSQKNVACKNGOTNCYQSYSTMSITD<del>CRE</del>TGSSKYPNCAYKTTQANKHIIVACE<del>GN</del>PyVPVHFDASV<br/> KETA<del>AAAK</del>FEROH<del>MD</del>SSTSA<del>ASS</del>SNYC<del>NQ</del>MMKSRNLTKDR<del>CK</del>PVNTFVHESLADVOAVCSQKNVACKNGOTNCYQSYSTMSITD<del>CRE</del>TGSSKYPNCAYKTTQANKHIIVACE<del>GN</del>PyVPVHFDASV</p> <p><b>Proposed:</b> aliSize=124 (resi) RMSD=0.65 (Å)<br/> KETA<del>AAAK</del>FEROH<del>MD</del>SSTSA<del>ASS</del>SNYC<del>NQ</del>MMKSRNLTKDR<del>CK</del>PVNTFVHESLADVOAVCSQKNVACKNGOTNCYQSYSTMSITD<del>CRE</del>TGSSKYPNCAYKTTQANKHIIVACE<del>GN</del>PyVPVHFDASV<br/> KETA<del>AAAK</del>FEROH<del>MD</del>SSTSA<del>ASS</del>SNYC<del>NQ</del>MMKSRNLTKDR<del>CK</del>PVNTFVHESLADVOAVCSQKNVACKNGOTNCYQSYSTMSITD<del>CRE</del>TGSSKYPNCAYKTTQANKHIIVACE<del>GN</del>PyVPVHFDASV</p>                                                                                                                                                                                                                                                                                                                                                                                                                                                                                                                                                                                                                                                                                                                                                                                                                                                           |
| 257 | <p>1f0vA<br/>(124)</p> <hr/> <p>2p6zB<br/>(109)</p> | C | <p>26.61</p> <p><b>TM-align:</b> aliSize=92 (resi) RMSD=2.27 (Å)<br/> keTAAAK<del>F</del>EROH<del>MD</del>SSTSA<del>ASS</del>SNYC<del>NQ</del>MMKSRNLTKDR<del>CK</del>PVNTFVHESLADVOAVCSQKNVACKNGOTNCYQSYSTMSITD<del>CRE</del>TgSSkypncAYKTTQANKHIIVACE<del>GN</del>Pyvpvhf<del>dasv</del>-----<br/> --REWE<del>K</del>FKTKHIT<del>-</del>QS<del>V</del>-AD<del>-</del>FN<del>-</del>CNRT<del>ND</del>paY<del>T</del>pdGQ<del>---</del>CKP<del>I</del>NTH<del>I</del>EST<del>T</del>GP<del>KEI</del>RR<del>-</del>A<del>-----</del>tgRVN<del>K</del>SS<del>T</del>QOFTL<del>IT</del>CKNP<del>-</del>IR<del>----</del>KS<del>Q</del>SNTT<del>NF</del>CIT<del>CRD</del>N<del>-----</del>ypvhf<del>v</del>ktg<del>k</del>c</p> <p><b>SARST:</b> aliSize=100 (resi) RMSD=9.42 (Å)<br/> ket-AAAK<del>F</del>EROH<del>MD</del>SSTSA<del>ASS</del>SNYC<del>NQ</del>MMKSRNLTKDR<del>CK</del>PVNTFVHESLADVOAVCSQKNVACKNGOTNCYQSYSTMSITD<del>CRE</del>TGSSKypncAYKTTQANKHIIVACE<del>GN</del>PyVPVHFDAS<del>----</del>sv<br/> ---rWE<del>K</del>FKTKHIT<del>-</del>QS<del>V</del>-----AD<del>F</del>NCNRT<del>ND</del>paY<del>T</del>pdGQ<del>---</del>CKP<del>I</del>NTH<del>I</del>EST<del>T</del>GP<del>KEI</del>RRATGRV<del>-----</del>NK<del>S</del>STQOFTL<del>IT</del>CKNP<del>IR</del>C<del>-----</del>KS<del>Q</del>SNTT<del>NF</del>CIT<del>CRD</del>N<del>-----</del>Y<del>VP</del>VH<del>V</del>Kt<del>g</del>k<del>c</del>---</p> <p><b>BLAST:</b> aliSize=55 (resi) iden=33.94% (37/109) simi=50.46% (55/109)<br/> ketaaa<del>----</del>k<del>F</del>EROH<del>MD</del>SSTSA<del>ASS</del>SNYC<del>NQ</del>MMKSRNLTKDR<del>CK</del>PVNTFVHESLADVOAVCSQKNVACKNGOTNCYQSYSTMSITD<del>CRE</del>tgsskypncAYKTTQANKHIIVACE<del>GN</del>PyVPVHFDAS<del>-----</del>dasv<br/> -----rewe<del>K</del>FKTKHIT<del>-</del>QS<del>V</del>AD<del>F</del>NCNRT<del>ND</del>paY<del>T</del>pdGQ<del>---</del>CKP<del>I</del>NTH<del>I</del>EST<del>T</del>GP<del>KEI</del>RRATGRV<del>-----</del>AT<del>GR</del>VN<del>K</del>SS<del>T</del>QOFTL<del>IT</del>CKNP<del>IR</del>C<del>-----</del>KS<del>Q</del>SNTT<del>NF</del>CIT<del>CRD</del>N<del>-----</del>Y<del>VP</del>VH<del>V</del>Kt<del>g</del>k<del>c</del>----</p> <p><b>Proposed:</b> aliSize=98 (resi) RMSD=1.63 (Å)<br/> keTAAAK<del>F</del>EROH<del>MD</del>SSTSA<del>ASS</del>SNYC<del>NQ</del>MMKSRNLTKDR<del>CK</del>PVNTFVHESLADVOAVCS<del>-----</del>qknvackngotncYQSYSTMSITD<del>CRE</del>TgSSkypncAYKTTQANKHIIVACE<del>GN</del>PyVPVHFDASV<del>--</del><br/> --REWE<del>K</del>FKTKHIT<del>-</del>QS<del>V</del>AD<del>F</del>NCNRT<del>ND</del>paY<del>T</del>pdGQ<del>---</del>CKP<del>I</del>NTH<del>I</del>EST<del>T</del>GP<del>KEI</del>RRatgr<del>-----</del>VN<del>K</del>SS<del>T</del>QOFTL<del>IT</del>CKNP<del>IR</del>C<del>-----</del>KS<del>Q</del>SNTT<del>NF</del>CIT<del>CRD</del>N<del>-----</del>Y<del>VP</del>VH<del>V</del>Kt<del>g</del>k<del>c</del>----</p> |

|     |                |   |       |                                                                                                                                                                                                                                                                                                                                                                                                                                                                                                                                                                                                                                                                                                                                                                                                                                                                                                                                                                                                                                                                                                                                                                                                                                                                                                                                                                            |
|-----|----------------|---|-------|----------------------------------------------------------------------------------------------------------------------------------------------------------------------------------------------------------------------------------------------------------------------------------------------------------------------------------------------------------------------------------------------------------------------------------------------------------------------------------------------------------------------------------------------------------------------------------------------------------------------------------------------------------------------------------------------------------------------------------------------------------------------------------------------------------------------------------------------------------------------------------------------------------------------------------------------------------------------------------------------------------------------------------------------------------------------------------------------------------------------------------------------------------------------------------------------------------------------------------------------------------------------------------------------------------------------------------------------------------------------------|
| 258 | 1f0vA<br>(124) | C | 69.35 | <p><b>TM-align:</b> aliSize=114 (resi) RMSD=1.43 (Å)</p> <p>kETAAAKFERQHMDSSSTAASSSNYCQMMKSRNLTKDRCKPVNTFVHESLADVQAVCSQKNVACKNGQTNCYOSYSTMSITDCRETGSSKYPNCAYKTTQANKHIIVACEGNPYvpvhfdasv-----<br/> -ESRAKRFQROHMDSSTSPSSSTYCQMMRRRNMTOGRCKPVNTFVHEPLVDVQNVCFDEKVTCKNGGNCYKSNSSMHIIDCRLINGSRYPNCAYRTSPKERHIIVACEGSPY-----vpvhfdasveds</p> <p><b>SARST:</b> aliSize=118 (resi) RMSD=9.00 (Å)</p> <p>ketaa---AKFERQHMDSSSTAASSSNYCQMMKSRNLTKDRCKPVNTFVHESLADVQAVCSQKNVACKNGQTNCYOSYSTMSITDCRETGSSKYPNCAYKTTQANKHIIVACEGNPYVPVHFDAS----v<br/> -----esrakRFQROHMDSSTSPSSSTYCQMMRRRNMTOGRCKPVNTFVHEPLVDVQNVCFDEKVTCKNGGNCYKSNSSMHIIDCRLINGSRYPNCAYRTSPKERHIIVACEGSPYVPVHFDASveds-</p> <p><b>BLAST:</b> aliSize=101 (resi) iden=69.35% (86/124) simi=81.45% (101/124)</p> <p>kETAAAKFERQHMDSSSTAASSSNYCQMMKSRNLTKDRCKPVNTFVHESLADVQAVCSQKNVACKNGQTNCYOSYSTMSITDCRETGSSKYPNCAYKTTQANKHIIVACEGNPYVPVHFDASV---<br/> -ESRAKRFQROHMDSSTSPSSSTYCQMMRRRNMTOGRCKPVNTFVHEPLVDVQNVCFDEKVTCKNGGNCYKSNSSMHIIDCRLINGSRYPNCAYRTSPKERHIIVACEGSPYVPVHFDASVeds</p> <p><b>Proposed:</b> aliSize=123 (resi) RMSD=0.81 (Å)</p> <p>kETAAAKFERQHMDSSSTAASSSNYCQMMKSRNLTKDRCKPVNTFVHESLADVQAVCSQKNVACKNGQTNCYOSYSTMSITDCRETGSSKYPNCAYKTTQANKHIIVACEGNPYVPVHFDASV---<br/> -ESRAKRFQROHMDSSTSPSSSTYCQMMRRRNMTOGRCKPVNTFVHEPLVDVQNVCFDEKVTCKNGGNCYKSNSSMHIIDCRLINGSRYPNCAYRTSPKERHIIVACEGSPYVPVHFDASVeds</p> |
|     | 2q4gX<br>(126) |   |       |                                                                                                                                                                                                                                                                                                                                                                                                                                                                                                                                                                                                                                                                                                                                                                                                                                                                                                                                                                                                                                                                                                                                                                                                                                                                                                                                                                            |
| 259 | 1f0vA<br>(124) | C | 99.19 | <p><b>TM-align:</b> aliSize=115 (resi) RMSD=1.30 (Å)</p> <p>KETAAAKFERQHMDSSSTAASSSNYCQMMKSRNLTKDRCKPVNTFVHESLADVQAVCSQKNVACKNGQTNCYOSYSTMSITDCRETGSSKYPNCAYKTTQANKHIIVACEGNPYvpvhfdasv-----<br/> KETAAAKFERQHMDSSSTAASSSNYCQMMKSRNLTKDRCKPVNTFAHESLADVQAVCSQKNVACKNGQTNCYOSYSTMSITDCRETGSSKYPNCAYKTTQANKHIIVACEGNPY-----vpvhfdasv</p> <p><b>SARST:</b> aliSize=122 (resi) RMSD=8.85 (Å)</p> <p>k-ETAAAKFERQHMDSSSTAASSSNYCQMMKSRNLTKDRCKPVNTFVHESLADVQAVCSQKNVACKNGQTNCYOSYSTMSITDCRETGSSKYPNCAYKTTQANKHIIVACEGNPYVPVHFDAS-v<br/> -kETAAAKFERQHMDSSSTAASSSNYCQMMKSRNLTKDRCKPVNTFAHESLADVQAVCSQKNVACKNGQTNCYOSYSTMSITDCRETGSSKYPNCAYKTTQANKHIIVACEGNPYVPVHFDASv-</p> <p><b>BLAST:</b> aliSize=123 (resi) iden=99.19% (123/124) simi=99.19% (123/124)</p> <p>KETAAAKFERQHMDSSSTAASSSNYCQMMKSRNLTKDRCKPVNTFVHESLADVQAVCSQKNVACKNGQTNCYOSYSTMSITDCRETGSSKYPNCAYKTTQANKHIIVACEGNPYVPVHFDASV<br/> KETAAAKFERQHMDSSSTAASSSNYCQMMKSRNLTKDRCKPVNTFAHESLADVQAVCSQKNVACKNGQTNCYOSYSTMSITDCRETGSSKYPNCAYKTTQANKHIIVACEGNPYVPVHFDASV</p> <p><b>Proposed:</b> aliSize=124 (resi) RMSD=0.49 (Å)</p> <p>KETAAAKFERQHMDSSSTAASSSNYCQMMKSRNLTKDRCKPVNTFVHESLADVQAVCSQKNVACKNGQTNCYOSYSTMSITDCRETGSSKYPNCAYKTTQANKHIIVACEGNPYVPVHFDASV<br/> KETAAAKFERQHMDSSSTAASSSNYCQMMKSRNLTKDRCKPVNTFAHESLADVQAVCSQKNVACKNGQTNCYOSYSTMSITDCRETGSSKYPNCAYKTTQANKHIIVACEGNPYVPVHFDASV</p>                  |
|     | 3dh6A<br>(124) |   |       |                                                                                                                                                                                                                                                                                                                                                                                                                                                                                                                                                                                                                                                                                                                                                                                                                                                                                                                                                                                                                                                                                                                                                                                                                                                                                                                                                                            |
| 260 | 1f0vA<br>(124) | C | 99.19 | <p><b>TM-align:</b> aliSize=115 (resi) RMSD=1.31 (Å)</p> <p>KETAAAKFERQHMDSSSTAASSSNYCQMMKSRNLTKDRCKPVNTFVHESLADVQAVCSQKNVACKNGQTNCYOSYSTMSITDCRETGSSKYPNCAYKTTQANKHIIVACEGNPYvpvhfdasv-----<br/> KETAAAKFERQHMDSSSTAASSSNYCQMMKSRNLTKDRCKPVNTFVHESLADVQAVCSQKNVACKNGQTNCYOSYSTMSITDCRETGSSKYPNCAYKTTQANKHIIVACEGNPY-----vpvhfdasv</p> <p><b>SARST:</b> aliSize=122 (resi) RMSD=8.84 (Å)</p> <p>k-ETAAAKFERQHMDSSSTAASSSNYCQMMKSRNLTKDRCKPVNTFVHESLADVQAVCSQKNVACKNGQTNCYOSYSTMSITDCRETGSSKYPNCAYKTTQANKHIIVACEGNPYVPVHFDAS-v<br/> -kETAAAKFERQHMDSSSTAASSSNYCQMMKSRNLTKDRCKPVNTFVHESLADVQAVCSQKNVACKNGQTNCYOSYSTMSITDCRETGSSKYPNCAYKTTQANKHIIVACEGNPYVPVHFDASv-</p> <p><b>BLAST:</b> aliSize=123 (resi) iden=99.19% (123/124) simi=99.19% (123/124)</p> <p>KETAAAKFERQHMDSSSTAASSSNYCQMMKSRNLTKDRCKPVNTFVHESLADVQAVCSQKNVACKNGQTNCYOSYSTMSITDCRETGSSKYPNCAYKTTQANKHIIVACEGNPYVPVHFDASV<br/> KETAAAKFERQHMDSSSTAASSSNYCQMMKSRNLTKDRCKPVNTFVHESLADVQAVCSQKNVACKNGQTNCYOSYSTMSITDCRETGSSKYPNCAYKTTQANKHIIVACEGNPYVPVHFDASV</p> <p><b>Proposed:</b> aliSize=124 (resi) RMSD=0.50 (Å)</p> <p>KETAAAKFERQHMDSSSTAASSSNYCQMMKSRNLTKDRCKPVNTFVHESLADVQAVCSQKNVACKNGQTNCYOSYSTMSITDCRETGSSKYPNCAYKTTQANKHIIVACEGNPYVPVHFDASV<br/> KETAAAKFERQHMDSSSTAASSSNYCQMMKSRNLTKDRCKPVNTFVHESLADVQAVCSQKNVACKNGQTNCYOSYSTMSITDCRETGSSKYPNCAYKTTQANKHIIVACEGNPYVPVHFDASV</p>                  |
|     | 3di7A<br>(124) |   |       |                                                                                                                                                                                                                                                                                                                                                                                                                                                                                                                                                                                                                                                                                                                                                                                                                                                                                                                                                                                                                                                                                                                                                                                                                                                                                                                                                                            |







|     |                                                     |   |       |                                                                                                                                                                                                                                                                                                                                                                                                                                                                                                                                                                                                                                                                                                                                                                                                                                                                                                                                                                                                                                                                                                                                                                                                                                                                                                                                                                                                                                                                                                                                                                                                                                                                                                                                                                                                                      |
|-----|-----------------------------------------------------|---|-------|----------------------------------------------------------------------------------------------------------------------------------------------------------------------------------------------------------------------------------------------------------------------------------------------------------------------------------------------------------------------------------------------------------------------------------------------------------------------------------------------------------------------------------------------------------------------------------------------------------------------------------------------------------------------------------------------------------------------------------------------------------------------------------------------------------------------------------------------------------------------------------------------------------------------------------------------------------------------------------------------------------------------------------------------------------------------------------------------------------------------------------------------------------------------------------------------------------------------------------------------------------------------------------------------------------------------------------------------------------------------------------------------------------------------------------------------------------------------------------------------------------------------------------------------------------------------------------------------------------------------------------------------------------------------------------------------------------------------------------------------------------------------------------------------------------------------|
| 267 | <p>1f0vA<br/>(124)</p> <hr/> <p>3rspA<br/>(124)</p> | C | 99.19 | <p><b>TM-align:</b> aliSize=115 (resi) RMSD=1.31 (Å)<br/> KETA<del>AAK</del>FERQHMDSSSTAASSSN<del>Y</del>CN<del>Q</del>MMKSRNLT<del>K</del>DRCKPVNTFVHESLADVOAVCSQKNVACKNGOTNCYQSYSTMSITDCRETGSSKYPNCAYKTTQANKHIIVACE<del>GN</del>PNYPVPHFDASV-----<br/> KETA<del>AAK</del>FERQHMDSSSTAASSSN<del>Y</del>CN<del>Q</del>MMKSRNLT<del>K</del>DRCKPVNTFVHESLADVOAVCSQKNVACKNGOTNCYQSYSTMSITDCRETGSSKYPNCAYKTTQANKHIIVACE<del>GN</del>PNYPVPHFDASV-----vpvhfdasv-----</p> <p><b>SARST:</b> aliSize=122 (resi) RMSD=8.84 (Å)<br/> k-ETAAAKFERQHMDSSSTAASSSN<del>Y</del>CN<del>Q</del>MMKSRNLT<del>K</del>DRCKPVNTFVHESLADVOAVCSQKNVACKNGOTNCYQSYSTMSITDCRETGSSKYPNCAYKTTQANKHIIVACE<del>GN</del>PNYPVPHFDASV-v<br/> -k-ETAAAKFERQHMDSSSTAASSSN<del>Y</del>CN<del>Q</del>MMKSRNLT<del>K</del>DRCKPVNTFVHESLADVOAVCSQKNVACKNGOTNCYQSYSTMSITDCRETGSSKYPNCAYKTTQANKHIIVACE<del>GN</del>PNYPVPHFDASV-v</p> <p><b>BLAST:</b> aliSize=123 (resi) iden=99.19% (123/124) simi=99.19% (123/124)<br/> KETA<del>AAK</del>FERQHMDSSSTAASSSN<del>Y</del>CN<del>Q</del>MMKSRNLT<del>K</del>DRCKPVNTFVHESLADVOAVCSQKNVACKNGOTNCYQSYSTMSITDCRETGSSKYPNCAYKTTQANKHIIVACE<del>GN</del>PNYPVPHFDASV<br/> KETA<del>AAK</del>FERQHMDSSSTAASSSN<del>Y</del>CN<del>Q</del>MMKSRNLT<del>K</del>DRCKPVNTFVHESLADVOAVCSQKNVACKNGOTNCYQSYSTMSITDCRETGSSKYPNCAYKTTQANKHIIVACE<del>GN</del>PNYPVPHFDASV</p> <p><b>Proposed:</b> aliSize=124 (resi) RMSD=0.58 (Å)<br/> KETA<del>AAK</del>FERQHMDSSSTAASSSN<del>Y</del>CN<del>Q</del>MMKSRNLT<del>K</del>DRCKPVNTFVHESLADVOAVCSQKNVACKNGOTNCYQSYSTMSITDCRETGSSKYPNCAYKTTQANKHIIVACE<del>GN</del>PNYPVPHFDASV<br/> KETA<del>AAK</del>FERQHMDSSSTAASSSN<del>Y</del>CN<del>Q</del>MMKSRNLT<del>K</del>DRCKPVNTFVHESLADVOAVCSQKNVACKNGOTNCYQSYSTMSITDCRETGSSKYPNCAYKTTQANKHIIVACE<del>GN</del>PNYPVPHFDASV</p> |
| 268 | <p>1f0vA<br/>(124)</p> <hr/> <p>4rsdA<br/>(124)</p> | C | 99.19 | <p><b>TM-align:</b> aliSize=115 (resi) RMSD=1.34 (Å)<br/> KETA<del>AAK</del>FERQHMDSSSTAASSSN<del>Y</del>CN<del>Q</del>MMKSRNLT<del>K</del>DRCKPVNTFVHESLADVOAVCSQKNVACKNGOTNCYQSYSTMSITDCRETGSSKYPNCAYKTTQANKHIIVACE<del>GN</del>PNYPVPHFDASV-----<br/> KETA<del>AAK</del>FERQHMDSSSTAASSSN<del>Y</del>CN<del>Q</del>MMKSRNLT<del>K</del>DRCKPVNTFVHESLADVOAVCSQKNVACKNGOTNCYQSYSTMSITDCRETGSSKYPNCAYKTTQANKHIIVACE<del>GN</del>PNYPVPHFDASV-----vpvhfaasv-----</p> <p><b>SARST:</b> aliSize=122 (resi) RMSD=8.84 (Å)<br/> k-ETAAAKFERQHMDSSSTAASSSN<del>Y</del>CN<del>Q</del>MMKSRNLT<del>K</del>DRCKPVNTFVHESLADVOAVCSQKNVACKNGOTNCYQSYSTMSITDCRETGSSKYPNCAYKTTQANKHIIVACE<del>GN</del>PNYPVPHFDASV-v<br/> -k-ETAAAKFERQHMDSSSTAASSSN<del>Y</del>CN<del>Q</del>MMKSRNLT<del>K</del>DRCKPVNTFVHESLADVOAVCSQKNVACKNGOTNCYQSYSTMSITDCRETGSSKYPNCAYKTTQANKHIIVACE<del>GN</del>PNYPVPHFDASV-v</p> <p><b>BLAST:</b> aliSize=123 (resi) iden=99.19% (123/124) simi=99.19% (123/124)<br/> KETA<del>AAK</del>FERQHMDSSSTAASSSN<del>Y</del>CN<del>Q</del>MMKSRNLT<del>K</del>DRCKPVNTFVHESLADVOAVCSQKNVACKNGOTNCYQSYSTMSITDCRETGSSKYPNCAYKTTQANKHIIVACE<del>GN</del>PNYPVPHFDASV<br/> KETA<del>AAK</del>FERQHMDSSSTAASSSN<del>Y</del>CN<del>Q</del>MMKSRNLT<del>K</del>DRCKPVNTFVHESLADVOAVCSQKNVACKNGOTNCYQSYSTMSITDCRETGSSKYPNCAYKTTQANKHIIVACE<del>GN</del>PNYPVPHFDASV</p> <p><b>Proposed:</b> aliSize=124 (resi) RMSD=0.59 (Å)<br/> KETA<del>AAK</del>FERQHMDSSSTAASSSN<del>Y</del>CN<del>Q</del>MMKSRNLT<del>K</del>DRCKPVNTFVHESLADVOAVCSQKNVACKNGOTNCYQSYSTMSITDCRETGSSKYPNCAYKTTQANKHIIVACE<del>GN</del>PNYPVPHFDASV<br/> KETA<del>AAK</del>FERQHMDSSSTAASSSN<del>Y</del>CN<del>Q</del>MMKSRNLT<del>K</del>DRCKPVNTFVHESLADVOAVCSQKNVACKNGOTNCYQSYSTMSITDCRETGSSKYPNCAYKTTQANKHIIVACE<del>GN</del>PNYPVPHFDASV</p> |
| 269 | <p>1f98A<br/>(125)</p> <hr/> <p>1s67L<br/>(119)</p> | N | 13.45 | <p><b>TM-align:</b> aliSize=105 (resi) RMSD=2.25 (Å)<br/> mehvafgsedientl----AKMDDgQ-LDGLAFGAIQLDGDGNILQYNAEGDIVERDPKQVIGKNFFKdVAPC--TDSPEFYGKFKEGVAS--N-LNTMFEYTFDY-OMTPKVKVHMKKALS--GDSWVFKRV-<br/> -----naadGIFFPALAEQNMMGAVLINENDEVMFFNPAEKLWYKREEVIGNNID--MLIPrdLRPA-HPEYIRHNREGgkaRvEGMSRELQLEKKdGSKIWTRFALSksVAegKVYLALVRDAs</p> <p><b>SARST:</b> aliSize=105 (resi) RMSD=5.97 (Å)<br/> mehvafgsedient-LAKMDDG-QLDGLAFGAIQLDGDGNILQYNAEGDIVERDPKQVIGKNFFKdVAPCTdsPEFYGKFKEGVAS----GNLNTMFEYTF-----DYQMTPTKVKVHMKKALSgDSWVFKRV--v<br/> -----nADGIFFPALAEQNMMGAVLINENDEVMFFNPAEKLWYKREEVIGNNIDMLIPrdLRPA-HPEYIRHNREGgkaRvEGMSRELQLEKKdGSKIWTRFALSksVAegKVYLALVRDAs</p> <p><b>BLAST:</b> aliSize=29 (resi) iden=12.61% (15/119) simi=24.37% (29/119)<br/> mehvafgsedientlakmddgqldglaf-----GAIQLDGDGNILQYNAEGDIVERDPKQVIGKNFFKdVAPC--TDSPEFYGKFKEGVAS--N-LNTMFEYTFDYOM--TPKVKVHMKKALS--GDSWVFKRV--<br/> -----naadgiffpaleqnmmgavlinendevmffnpaeklwkykreevignnidmliprdlrpa--hpeyirhnreggkarvegmsrelqlekkdgskiwtrfalsksvaegkvyylalvrdas-----</p> <p><b>Proposed:</b> aliSize=109 (resi) RMSD=2.10 (Å)<br/> mehvafgsED-IEntLA-KMddgqldglafGAIQLDGDGNILQYNAEGDIVERDPKQVIGKNFFKdVAPC--TDSPEFYGKFKEGVAS--N-LNTMFEYTFDYOM--TPKVKVHMKKALS--GDSWVFKRV--<br/> -----NAaDG--IFfpa----LEQNMMGAVLINENDEVMFFNPAEKLWYKREEVIGNNID-MLIPrdLRPA-HPEYIRHNREGgkaRvEGMSRELQLEKKdGSKIWTRFALSksVAegKVYLALVRDAs</p>                                                                                                                                                                                                                                                                                                                                                                                                                        |

|     |                                                     |   |       |                                                                                                                                                                                                                                                                                                                                                                                                                                                                                                                                                                                                                                                                                                                                                                                                                                                                                                                                                                                                                                                                                                                                                                                                                                                                                                                                                                          |
|-----|-----------------------------------------------------|---|-------|--------------------------------------------------------------------------------------------------------------------------------------------------------------------------------------------------------------------------------------------------------------------------------------------------------------------------------------------------------------------------------------------------------------------------------------------------------------------------------------------------------------------------------------------------------------------------------------------------------------------------------------------------------------------------------------------------------------------------------------------------------------------------------------------------------------------------------------------------------------------------------------------------------------------------------------------------------------------------------------------------------------------------------------------------------------------------------------------------------------------------------------------------------------------------------------------------------------------------------------------------------------------------------------------------------------------------------------------------------------------------|
| 270 | <p>1f98A<br/>(125)</p> <hr/> <p>1s67U<br/>(115)</p> | N | 13.91 | <p><b>TM-align:</b> aliSize=106 (resi) RMSD=2.30 (Å)<br/> mehvafgsedientlAKMddGQLDGLAFGAIQLDGDGNILQYNAEGDIVGRDPKQVIGKNFFkdVAPC--TDSPeFYGKFKEGVASLN-LNT--MFYTFDY-QMTPKVKVHMKKALS--GDSWVFKRV-<br/> -----GIFFPALAEQNMMGAVLINENDEVMFFNPAEKLWGYKREEVICNNID--MLIPrdLRPA-HPEYIRHNREGKArVEgmSRLEKkDgSKIWTRFALSIVSAegKVYLLALVRDAs</p> <p><b>SARST:</b> aliSize=102 (resi) RMSD=3.50 (Å)<br/> mehvafgsedientlakmd---DGQLDGLAFGAIQLDGDGNILQYNAEGDIVGRDPKQVIGKNFFKDVAPCTdsPEFYGKFKEGVAS--GNLN-----TMFEYTFDYQmTPTKVKVHMKKALS--GDSWVFKRV--v<br/> -----giffPALAEQNMMGAVLINENDEVMFFNPAEKLWGYKREEVICNNIDMLIPrdLR--RPAHPEYIRHNREGKARvegmsRELQLEKKDG-SKIWTRFALSIVSAEGKvyLLALVRDas-</p> <p><b>BLAST:</b> aliSize=29 (resi) iden=13.04% (15/115) simi=25.22% (29/115)<br/> mehvafgsedientlakmddgldglaf-----GAIQLDGDGNILQYNAEGDIVGRDPKQVIGKNFF----KDVAFCTdsPEFYGKFKEG-----vasgnlntmfeytfdyqmtptkvkvhmkkalsgdsywfvkrv<br/> -----giffpaleqnmngavlinendevmffnPAEKLWGYKREEVICNNIDmliprdLRPA--HPEYIRHNREGkArvegmsrelqlekkdgskiwtrfalskvsaeqkvyllalvrda-----</p> <p><b>Proposed:</b> aliSize=107 (resi) RMSD=2.23 (Å)<br/> mEhVafgsedientLakMddGQLDGLAFGAIQLDGDGNILQYNAEGDIVGRDPKQVIGKNFFkdVAPC-TDSPeFYGKFKEGVASLN-LNT--MFYTFDYQm-TPTKVKVHMKKALS--GDSWVFKRV--<br/> --G-I-----F--F--PALAEQNMMGAVLINENDEVMFFNPAEKLWGYKREEVICNNID-MLIPrdLRPA-HPEYIRHNREGKArVEgmSRLEKkDgSKIWTRFALSIVSAegKVYLLALVRDAs</p> |
| 271 | <p>1f98A<br/>(125)</p> <hr/> <p>1v9zA<br/>(113)</p> | N | 14.16 | <p><b>TM-align:</b> aliSize=105 (resi) RMSD=2.26 (Å)<br/> mehvafgsedientlAKMddGQLDGLAFGAIQLDGDGNILQYNAEGDIVGRDPKQVIGKNFFkdVAPC--TDSPeFYGKFKEGVASLN-LNT--MFYTFDY-QMTPKVKVHMKKALS--GDSWVFKRV<br/> -----GIFFPALAEQNMMGAVLINENDEVMFFNPAEKLWGYKREEVICNNID--MLIPrdLRPA-HPEYIRHNREGKArVEgmSRLEKkDgSKIWTRFALSIVSAegKVYLLALVRD-</p> <p><b>SARST:</b> aliSize=103 (resi) RMSD=3.01 (Å)<br/> mehvafgsedientlakmd---DGQLDGLAFGAIQLDGDGNILQYNAEGDIVGRDPKQVIGKNFFKDVAPCTdsPEFYGKFKEGVASNLNTM---FEYTFDY-QMTPKVKVHMKKALS--GDSWVFKRV---rv<br/> -----giffPALAEQNMMGAVLINENDEVMFFNPAEKLWGYKREEVICNNIDMLIPrdLR--RPAHPEYIRHNREGKARvegmsRELQLEKKDGSKIWTRFALSIVSAEGKvyLLALVRd--</p> <p><b>BLAST:</b> aliSize=29 (resi) iden=13.27% (15/113) simi=25.66% (29/113)<br/> mehvafgsedientlakmddgldglaf-----GAIQLDGDGNILQYNAEGDIVGRDPKQVIGKNFF----KDVAFCTdsPEFYGKFKEG-----vasgnlntmfeytfdyqmtptkvkvhmkkalsgdsywfvkrv<br/> -----giffpaleqnmngavlinendevmffnPAEKLWGYKREEVICNNIDmliprdLRPA--HPEYIRHNREGkArvegmsrelqlekkdgskiwtrfalskvsaeqkvyllalvrda-----</p> <p><b>Proposed:</b> aliSize=106 (resi) RMSD=2.00 (Å)<br/> mehvafgsEDIENTlakmddgldGLAFGAIQLDGDGNILQYNAEGDIVGRDPKQVIGKNFFkdVAPC-TDSPeFYGKFKEGVASLN--LNT-MFYTFDYQm-TPTKVKVHMKKALS--GDSWVFKRV-v<br/> -----GIFFPALAEQNMMGAVLINENDEVMFFNPAEKLWGYKREEVICNNID-MLIPrdLRPA-HPEYIRHNREGKArVEgmSRLEKkDgSKIWTRFALSIVSAegKVYLLALVRDh-</p>                |
| 272 | <p>1f98A<br/>(125)</p> <hr/> <p>1vb6A<br/>(114)</p> | N | 14.04 | <p><b>TM-align:</b> aliSize=106 (resi) RMSD=2.29 (Å)<br/> mehvafgsedientlAKMddGQLDGLAFGAIQLDGDGNILQYNAEGDIVGRDPKQVIGKNFFkdVAPC--TDSPeFYGKFKEGVASLN-LNT--MFYTFDY-QMTPKVKVHMKKALS--GDSWVFKRV<br/> -----GIFFPALAEQNMMGAVLINENDEVMFFNPAEKLWGYKREEVICNNID--MLIPrdLRPA-HPEYIRHNREGKArVEgmSRLEKkDgSKIWTRFALSIVSAegKVYLLALVRDAs</p> <p><b>SARST:</b> aliSize=102 (resi) RMSD=3.53 (Å)<br/> mehvafgsedientlakmd---DGQLDGLAFGAIQLDGDGNILQYNAEGDIVGRDPKQVIGKNFFKDVAPCTdsPEFYGKFKEGVASNLN-----TMFEYTFDYQmTPTKVKVHMKKALS--GDSWVFKRV----rv<br/> -----giffPALAEQNMMGAVLINENDEVMFFNPAEKLWGYKREEVICNNIDMLIPrdLR--RPAHPEYIRHNREGKARvegmsRELQLEKKDG-SKIWTRFALSIVSAEGKvyLLALVRda--</p> <p><b>BLAST:</b> aliSize=29 (resi) iden=13.16% (15/114) simi=25.44% (29/114)<br/> mehvafgsedientlakmddgldglaf-----GAIQLDGDGNILQYNAEGDIVGRDPKQVIGKNFF----KDVAFCTdsPEFYGKFKEG-----vasgnlntmfeytfdyqmtptkvkvhmkkalsgdsywfvkrv<br/> -----giffpaleqnmngavlinendevmffnPAEKLWGYKREEVICNNIDmliprdLRPA--HPEYIRHNREGkArvegmsrelqlekkdgskiwtrfalskvsaeqkvyllalvrda-----</p> <p><b>Proposed:</b> aliSize=107 (resi) RMSD=2.04 (Å)<br/> mehvafgsEDIENTlakmddgldGLAFGAIQLDGDGNILQYNAEGDIVGRDPKQVIGKNFFkdVAPC-TDSPeFYGKFKEGVASLN-LNT--MFYTFDYQm-TPTKVKVHMKKALS--GDSWVFKRV--<br/> -----GIFFPALAEQNMMGAVLINENDEVMFFNPAEKLWGYKREEVICNNID-MLIPrdLRPA-HPEYIRHNREGKArVEgmSRLEKkDgSKIWTRFALSIVSAegKVYLLALVRDAh-</p>         |

|     |                                                             |   |       |                                                                                                                                                                                                                                                                                                                                                                                                                                                                                                                                                                                                                                                                                                                                                                                                                                                                                                                                                                                                                                                                                                                                                                                                                                                                                                                                                                                                                                                                                                                                                                                                                                                                                                           |
|-----|-------------------------------------------------------------|---|-------|-----------------------------------------------------------------------------------------------------------------------------------------------------------------------------------------------------------------------------------------------------------------------------------------------------------------------------------------------------------------------------------------------------------------------------------------------------------------------------------------------------------------------------------------------------------------------------------------------------------------------------------------------------------------------------------------------------------------------------------------------------------------------------------------------------------------------------------------------------------------------------------------------------------------------------------------------------------------------------------------------------------------------------------------------------------------------------------------------------------------------------------------------------------------------------------------------------------------------------------------------------------------------------------------------------------------------------------------------------------------------------------------------------------------------------------------------------------------------------------------------------------------------------------------------------------------------------------------------------------------------------------------------------------------------------------------------------------|
| 273 | <p><b>lfyrA</b><br/>(95)</p> <p><b>lju5A</b><br/>(109)</p>  | C | 26.32 | <p><b>TM-align:</b> aliSize=64 (resi) RMSD=1.92 (Å)<br/> hPwFFKIPRAKAEEMLSKDRhdGAFLIRESESAPGDFSLSVKFGNDVQHFVKVLRD-----GAGKYFLWVVKfnsInelvdyhrstsvsrnqqiflrdie-----<br/> -SWYWRLSRQEAVALLOGDR-HGVFLVRDSSTSPGDYVLSVSENSRSHYIINSSgprppvppspaqqppgvSPSRLRIGDQ-----efdslpallefykihyldtttiepvsr</p> <p><b>SARST:</b> aliSize=73 (resi) RMSD=8.83 (Å)<br/> hpwffg----KIPRAKAEEMLSKDRhdGAFLIRESESAPGDFSLSVKFGNDVQHFVKVLRDGA-----KYFLWVV----KFNLSLNEVDYHRS-----tsvsrnqqiflrdie<br/> -----swywgRLSRQEAVALLOGDR-HGVFLVRDSSTSPGDYVLSVSENSRSHYIINSSGPrppvppspaqqppVSPSRLRIGDQEDSLPALLEFYKIhyldtttiepvsr-----</p> <p><b>BLAST:</b> aliSize=36 (resi) iden=23.16% (22/95) simi=37.89% (36/95)<br/> hp- VFFKIPRAKAEEMLSKDRhdGAFLIRESESAPGDFSLSVKFGNDVQHFVKVLRD-----agkyfLwvKfnsInelvdyhrstsvsrnqqiflrdie<br/> --sWYWRLSRQEAVALLOGDR-HGVFLVRDSSTSPGDYVLSVSENSRSHYIINSSGPrppvppspaqqppgvsprrlrigdqefdslpallefykihyldtttiepvsr-----</p> <p><b>Proposed:</b> aliSize=89 (resi) RMSD=1.64 (Å)<br/> hPwFFKIPRAKAEEMLSKDRhdGAFLIRESESAPGDFSLSVKFGNDVQHFVKVLR-----dGAGKYFLWVVKFNSLNEVDYHRSTSVSrnQQiFLRDI--E<br/> -SWYWRLSRQEAVALLOGDR-HGVFLVRDSSTSPGDYVLSVSENSRSHYIINSSgprppvppspaqqppgv-SPSRLRIGDQEDSLPALLEFYKIHYLD--TT-TIIEPvsR</p>                                                                                                                                                                                                                                                                                                                                                                                                                                                                                             |
| 274 | <p><b>lgq9A</b><br/>(241)</p> <p><b>lqwjA</b><br/>(228)</p> | M | 17.54 | <p><b>TM-align:</b> aliSize=199 (resi) RMSD=2.70 (Å)<br/> -SKAVIVIPARYSSRLFGPLLDIVKEMOHYERALOVAGVAEVAATDPRVEOAVOAFGGKAIMTRNDH---ESGTRLVVMHKV-EADYILOGDEPMIRRVIVETLLOGMRDDPaLPVATLCHAI SAAeAe-Pstvkvvvntrqdalysrsp-----IPYPR--NAE---KA<br/> pPHLAALVLAGGSKGITLNIKRLAGVPLGWLRAALDAGVFQSVVSTHDEIENVAKQFGAQVHRRSSEtskdsSTSLDAIVFLNYHnVVDIVGNIQATSClHFTLQKVAEMIREEG-YDSVFSVVRRHQF-RW-se-----iqkgvrevtePLNLNpaKRPrqdWD</p> <p><b>SARST:</b> aliSize=184 (resi) RMSD=8.10 (Å)<br/> s--KAVIVIPARYSSRLFGPLLDIVKEMOHYERALOVAGVAEVAATDPRVEOAVOAFGGKAIMTR--NDHE--SGTRLVVMHKV-EADYILOGDEPMIRRVIVETLLOGMRDDPaLPVATLCHAI saacaaepsTVKVVNTRODALyfsSPIPYPRN-----AEKARYLKHV--G<br/> --ppHLAALVLAGGSKGITLNIKRLAGVPLGWLRAALDAGVFQSVVSTHDEIENVAKQFGAQVHRRSseTSKDsSTSLDAIVFLNYHnVVDIVGNIQATSClHFTLQKVAEMIRE-EGYDSVFSVVRRHQF-RW-se-----HQFRWSEIQKGV-----REVTEPLNLNpaKRPrQDWDQELYEngS</p> <p><b>BLAST:</b> aliSize=64 (resi) iden=17.11% (39/228) simi=28.07% (64/228)<br/> sk---AVIVIPARYSSRLFGPLLDIVKEMOHYERALOVAGVAEVAATDPRVEOAVOAFGG---KAIMRNDHESGTRLVVMHKVHADYILOGDEPMIRRVIVETLLOGMRDD-----<br/> --pphLAALVLAGGSKGITLNIKRLAGVPLGWLRAALDAGVFQSVVSTHDEIENVAKQFGAQVHRRSSEtskdsSTSLDAIVFLNYHnVVDIVGNIQATSClHFTLQKVAEMIREEgydsVFSVVRRHQFRWSEIQKGVrevteplnlpaKRPrqdWdeelyengsfyafakrhliem</p> <p><b>Proposed:</b> aliSize=201 (resi) RMSD=2.30 (Å)<br/> -SKAVIVIPARYSSRLFGPLLDIVKEMOHYERALOVAGVAEVAATDPRVEOAVOAFGGKAIMTRNDH---ESGTRLVVMHKV-EADYILOGDEPMIRRVIVETLLOGMRDDPaLPVATLCHAI SAAeaaepsTVK-----vntRODALYFSRSPIPYP-----rnaeKARYLKHV<br/> pPHLAALVLAGGSKGITLNIKRLAGVPLGWLRAALDAGVFQSVVSTHDEIENVAKQFGAQVHRRSSEtskdsSTSLDAIVFLNYHnVVDIVGNIQATSClHFTLQKVAEMIREEG-YDSVFSVVRRHQF-----RWSeiqkg---VREV-TEPLNLNpaKRPrqd---WDGEIYEN</p> |
| 275 | <p><b>lh8xA</b><br/>(125)</p> <p><b>lawzA</b><br/>(123)</p> | N | 33.33 | <p><b>TM-align:</b> aliSize=98 (resi) RMSD=2.12 (Å)<br/> kesaaakferqhmdsgns-----PSSSTYCNQMMRRRNMtQgRCKPVNTFVHEPLVDVQNVCF--QEKVTckngqG-CYKSNSSMHIIDRLTNGSRYPNCAVYRTSOKERHII VACEGspYVPVHFDA-SV--E<br/> -----qdnsrythfl tqhydakpQGR-DDRYCESIMRRRGLTS-PCKDINTHIFGNKRSIKAIEknkGNPHR-----ENLRI SKSSFQVITCKLHGGSPPWPPQYRATAGFRNvvVACEN--GLPVHLDQsIFrrP</p> <p><b>SARST:</b> aliSize=90 (resi) RMSD=5.21 (Å)<br/> kesaaakferqhmdsgnspsss-----TYCNQMMRRRNMtQgRCKPVNTFVHEPLVDVQNVCFqekvTCKNGQGN---CYKSNSSMHIIDRLTNGSRYPNCAVYRTSOKERHII VACEGspYVPVHFDA-SV-----e<br/> -----qdnsrythfl tqhydakpQGRDDRYCESIMRRRGLTS-PCKDINTHIFGNKRSIKAIE-----ENKNGNPHrenLRI SKSSFQVITCKLHGGSPPWPPQYRATAGFRNvvVACEN-----GLPVHLDQsIFrrP</p> <p><b>BLAST:</b> aliSize=66 (resi) iden=36.59% (45/123) simi=53.66% (66/123)<br/> kesaaak-----ERQIMTSGnSPSS-SSTYCNQMMRRRNMtQgRCKPVNTFVHEplvDVQNVcfqevTCKNGQGNCYKSN-----SSMHIIDRLTNGSRYPNCAVYRTSOKERHII VACEGspYVPVHFDA-SV-----e<br/> -----qdnsrythfl tqhydakpQGRDDRYCESIMRRRGLTS-PCKDINTHIFGNKRSIKAIE-----ENKNGNPHrenLRI SKSSFQVITCKLHGGSPPWPPQYRATAGFRNvvVACEN--LPVHLDQsIFrrP</p> <p><b>Proposed:</b> aliSize=112 (resi) RMSD=1.65 (Å)<br/> kE--SAAAKERQIMTSGN-SPSSSTYCNQMMRRRNMtQgRCKPVNTFVHEPLVDVQNVCF--QEKVTckngqG-CYKSNSSMHIIDRLTNGSRYPNCAVYRTSOKERHII VACEGspYVPVHFDA-S----ve<br/> -QdnSRyThELTqHydAKPqGRD--DRYCESIMRRRGLTS-PCKDINTHIFGNKRSIKAIEknkGNPHR-----ENLRI SKSSFQVITCKLHGGSPPWPPQYRATAGFRNvvVACEN--GLPVHLDQsIFrrP--</p>                                                                                                                                                                                                                                                       |

|     |                                                             |   |       |                                                                                                                                                                                                                                                                                                                                                                                                                                                                                                                                                                                                                                                                                                                                                                                                                                                                                                                                                                                                                                                                                                                                                                                                                                                                                                                                                                                                                                    |
|-----|-------------------------------------------------------------|---|-------|------------------------------------------------------------------------------------------------------------------------------------------------------------------------------------------------------------------------------------------------------------------------------------------------------------------------------------------------------------------------------------------------------------------------------------------------------------------------------------------------------------------------------------------------------------------------------------------------------------------------------------------------------------------------------------------------------------------------------------------------------------------------------------------------------------------------------------------------------------------------------------------------------------------------------------------------------------------------------------------------------------------------------------------------------------------------------------------------------------------------------------------------------------------------------------------------------------------------------------------------------------------------------------------------------------------------------------------------------------------------------------------------------------------------------------|
| 276 | <p><b>1h8xA</b><br/>(125)</p> <p><b>1e21A</b><br/>(119)</p> | N | 94.12 | <p><b>TM-align:</b> aliSize=106 (resi) RMSD=0.84 (Å)<br/>kesaaakferqhmdsgns-----PSSsSYCNQMRRRRNMTQGRCKPVNTFVHEPLVDVQNVCFQEKVTCKNGQGNCYKSNSSSMHITDCRLTNGSRYPNCAYRTSQKERHIIVACEGSPYVPVHFDA-SVE---<br/>-----afqrqhmdsdspsSSS-SYCNQMRRRRNMTQGRCKPVNTFVHEPLVDVQNVCFQEKVTCKNGQGNCYKSNSSSMHITDCRLTNGSRYPNCAYRTSQKERHIIVACEGSPYVPVHFDA-SVE---</p> <p><b>SARST:</b> aliSize=117 (resi) RMSD=9.42 (Å)<br/>kesaaak-ERQHMDSGNSPSSSYCNQMRRRRNMTQGRCKPVNTFVHEPLVDVQNVCFQEKVTCKNGQGNCYKSNSSSMHITDCRLTNGSRYPNCAYRTSQKERHIIVACEGSPYVPVHFDA-SVE---e<br/>-----aERQHMDSDSPSSSYCNQMRRRRNMTQGRCKPVNTFVHEPLVDVQNVCFQEKVTCKNGQGNCYKSNSSSMHITDCRLTNGSRYPNCAYRTSQKERHIIVACEGSPYVPVHFDA-SVE---e</p> <p><b>BLAST:</b> aliSize=116 (resi) iden=95.80% (114/119) simi=97.48% (116/119)<br/>kesaaak-ERQHMDSGNSPSSSYCNQMRRRRNMTQGRCKPVNTFVHEPLVDVQNVCFQEKVTCKNGQGNCYKSNSSSMHITDCRLTNGSRYPNCAYRTSQKERHIIVACEGSPYVPVHFDA-SVE---e<br/>-----aERQHMDSDSPSSSYCNQMRRRRNMTQGRCKPVNTFVHEPLVDVQNVCFQEKVTCKNGQGNCYKSNSSSMHITDCRLTNGSRYPNCAYRTSQKERHIIVACEGSPYVPVHFDA-SVE---</p> <p><b>Proposed:</b> aliSize=117 (resi) RMSD=0.78 (Å)<br/>kesaaakERQHMDSGNSPS--SSSYCNQMRRRRNMTQGRCKPVNTFVHEPLVDVQNVCFQEKVTCKNGQGNCYKSNSSSMHITDCRLTNGSRYPNCAYRTSQKERHIIVACEGSPYVPVHFDA-SVE---<br/>-----AERQHMDSDSPSSs--SYCNQMRRRRNMTQGRCKPVNTFVHEPLVDVQNVCFQEKVTCKNGQGNCYKSNSSSMHITDCRLTNGSRYPNCAYRTSQKERHIIVACEGSPYVPVHFDA-SVE---</p>                                                          |
| 277 | <p><b>1h8xA</b><br/>(125)</p> <p><b>1gioA</b><br/>(125)</p> | N | 30.40 | <p><b>TM-align:</b> aliSize=98 (resi) RMSD=2.14 (Å)<br/>kesaaakferqhmdsgns-----PSsSSTYCNQMRRRRNMTQGRCKPVNTFVHEPLVDVQNVCF---QEKVTCKngqgNCYKSNSSSMHITDCRLTNGSRYPNCAYRTSQKERHIIVACEGspYVPVHFDA-SVE---<br/>-----aqddyryihfl tqhydakpkGR-NDEYCFNMKNRRLTR-PCKDRNTFIHGKNKIKAIEdrnGOPYRG-----DLRISKSEFOITIKHKGGSSRPQRYGATEDSRVIVGCEN--GLPVHDEsFITprh</p> <p><b>SARST:</b> aliSize=90 (resi) RMSD=2.61 (Å)<br/>kesaaakferqhmdsgnspss-----SSTYCNQMRRRRNMTQGRCKPVNTFVHEPLVDVQNVCF---FQEKVTCKngqgNCYKSNSSSMHITDCRLTNGSRYPNCAYRTSQKERHIIVACEGSPYVP-----vhfdasve<br/>-----aqddyryihfl tqhydakpkgrNDEYCFNMKNRRLTR-PCKDRNTFIHGKNKIKAIEdrnGOPYRG-----LRIKSEFOITIKHKGGSSRPQRYGATEDSRVIVGCENGLPVHdesfitprh-----</p> <p><b>BLAST:</b> aliSize=61 (resi) iden=36.00% (45/125) simi=48.80% (61/125)<br/>kesaaak-----ERQHMDSGNSPSS-SSTYCNQMRRRRNMTQGRCKPVNTFVHEPLVDVQNVCFqKvtckngq---NCYKSNSSSMHITDCRLTNGSRYPNCAYRTSQKERHIIVACEGspYVPVHFDA-SVE---<br/>-----aqddyryihfl tqhyDA--KPKGRNDEYCFNMKNRRLTR-PCKDRNTFIHGKNKIKAIEd---RNQOPYRDLRISKSEFOITIKHKGGSSRPQRYGATEDSRVIVGCEN--LPVHDEsfitprh--</p> <p><b>Proposed:</b> aliSize=113 (resi) RMSD=1.90 (Å)<br/>k---ESAAAKERQHMDSGNSPSSsS-SYCNQMRRRRNMTQGRCKPVNTFVHEPLVDVQNVCF---QEKVT-ckngqgNCYKSNSSSMHITDCRLTNGSRYPNCAYRTSQKERHIIVACEGspYVPVHFDA-SVE---<br/>-aqdYRYIHfl tqhyDA--KPKGR--NdeYCFNMKNRRLTR-PCKDRNTFIHGKNKIKAIEdrnGOPYRG-----DLRISKSEFOITIKHKGGSSRPQRYGATEDSRVIVGCEN--GLPVHDEsFITprh</p>             |
| 278 | <p><b>1h8xA</b><br/>(125)</p> <p><b>1k58A</b><br/>(123)</p> | N | 32.52 | <p><b>TM-align:</b> aliSize=98 (resi) RMSD=2.16 (Å)<br/>kesaaakferqhmdsgns-----PSsSSTYCNQMRRRRNMTQGRCKPVNTFVHEPLVDVQNVCF---QEKVTCKngqgNCYKSNSSSMHITDCRLTNGSRYPNCAYRTSQKERHIIVACEGspYVPVHFDA-SVE---<br/>-----dnsrythfl tqhydakpGR-DDRYCESIMRRRGLTS-PCKDINTFIHGKNRSIKAIEnknGNPHRE-----DLRISKSSFOVITIKLHGSSPWPQRYRATAGFRNVVACEN--GLPVHLHqsIFRrp</p> <p><b>SARST:</b> aliSize=105 (resi) RMSD=13.38 (Å)<br/>kes---AAAKERQHMDSGNSpssSST---YCNQMRRRRNMTQGRCKPVNTFVHEPLVDVQN---VCFQEKVTCKngqgNCYKSNSSSMHITDCRLTNGSRYPNCAYRTSQKERHIIVACEGspYVPVHF-----dasve<br/>---dnsRYTHfl tqhyDAKP---QGRddrYCESIMRRRGLTS-PCKDINTFIHGKNRSIKAIEnknGNPHREN-----LRIKSSFOVITIKLHGSSPWPQRYRATAGFRNVVACEN--GLPVHLhqsifrrp----</p> <p><b>BLAST:</b> aliSize=65 (resi) iden=36.07% (44/123) simi=53.28% (65/123)<br/>kesaaak-----ERQHMDSGNSPSS-SSTYCNQMRRRRNMTQGRCKPVNTFVHEPLVDVQNVCFqvtckngqgNCYKSNSSSMHITDCRLTNGSRYPNCAYRTSQKERHIIVACEGspYVPVHFDA-SVE---<br/>-----dnsrythfl tqhyDA--KPOGRDDRYCESIMRRRGLTS-PCKDINTFIHG---NKRSI---KAIEnknGNPHRENl riskSSFOVITIKLHGSSPWPQRYRATAGFRNVVACEN--LPVHLHqsIFrrp-</p> <p><b>Proposed:</b> aliSize=111 (resi) RMSD=1.54 (Å)<br/>ke---SAAAKERQHMDSGN-SPSSsSSTYCNQMRRRRNMTQGRCKPVNTFVHEPLVDVQNVCF---QEKVTCKngqgNCYKSNSSSMHITDCRLTNGSRYPNCAYRTSQKERHIIVACEGspYVPVHFDA--AS---ve<br/>--pdnRYTHfl tqhyDAKPqGRD--DRYCESIMRRRGLTS-PCKDINTFIHGKNRSIKAIEnknGNPHRE-----DLRISKSSFOVITIKLHGSSPWPQRYRATAGFRNVVACEN--GLPVHLHqsIFrrp--</p> |

|     |                                                                   |   |       |                                                                                                                                                                                                                                                                                                                                                                                                                                                                                                                                                                                                                                                                                                                                                                                                                                                                                                                                                                                                                                                                                                                                                                                                                                                                                                                                                                                |
|-----|-------------------------------------------------------------------|---|-------|--------------------------------------------------------------------------------------------------------------------------------------------------------------------------------------------------------------------------------------------------------------------------------------------------------------------------------------------------------------------------------------------------------------------------------------------------------------------------------------------------------------------------------------------------------------------------------------------------------------------------------------------------------------------------------------------------------------------------------------------------------------------------------------------------------------------------------------------------------------------------------------------------------------------------------------------------------------------------------------------------------------------------------------------------------------------------------------------------------------------------------------------------------------------------------------------------------------------------------------------------------------------------------------------------------------------------------------------------------------------------------|
| 279 | <p><b>1h8xA</b><br/>(125)</p> <hr/> <p><b>1kvzA</b><br/>(107)</p> | N | 23.36 | <p><b>TM-align:</b> aliSize=87 (resi) RMSD=2.68 (Å)<br/> kesaaakferqhmdsgnsp-----SssSTYCNQMRRRNMTQgrCKPVNTFVHEPLVDVQNVCFQekvtckngq--GNCYKSNSSMHITDCRLTNGSRypnCAVRTSOKERHIIVACEGspYVPVHFDAASVE--<br/> -----mqdwatfkkkhltdtw--DVDCDNLMPSTSLF--D--CKDKNTFIYSLPGPKALCRG-----vi fSADVLSNSEFYLAECNVKPRK---CKYKLLKSSNRICIRCEH--ELPVHAGVGIcp</p> <p><b>SARST:</b> aliSize=72 (resi) RMSD=3.06 (Å)<br/> kesaaakferqhmdsgnspsssstycnqmmrrrnmqtqgrc-----PVPNTFVHEPLVDVQNVCFQEKVTckngqGNCYKSNSSMHITDCRLTNGSRypnCAVRTSOKERHIIVACEGspYVPVHFDAAS----ve<br/> -----mqdwatfkkkhltdtwdvcdnlmptslfdcdKNTFIYSLPGPKALCRGVIFS-----ADVLSNSEFYLAECNVKPRK---PKYKLLKSSNRICIRCEH--ELPVHAGVGIcp--</p> <p><b>BLAST:</b> aliSize=37 (resi) iden=20.56% (22/107) simi=34.58% (37/107)<br/> kesaaakferqhmdsgnspsssstycnqmmrrrnmqtqgr-----PVPNTFVHEPLVDVQNVCFQEKVTCKngqncYKSNSSMHITDCRLTngSRypnCAVRTSOKERHIIVACEGspYVPVHF-----dasve<br/> -----mqdwatfkkkhltdtwdvcdnlmptslfdcdKNTFIYSLPGPKALCRGVIFSAD-----VLSNSEFYLAECNVK---PKYKLLKSSNRICIRCEH--LPVHAGVGIcp-----</p> <p><b>Proposed:</b> aliSize=98 (resi) RMSD=1.94 (Å)<br/> KESAAKFERQHMDSGNSP--sssstyCNQMRRRNMTQgrCKPVNTFVHEPLVDVQNVCF---qekvtckngqGNCYKSNSSMHITDCRLTNGSRypnCAVRTSOKERHIIVACEGspYVPVHFDAASV---e<br/> MOD-WITFKKKHLTD-TWDvd-----CDNLMPSTSLF--CKDKNTFIYSLPGPKALCRGVif-----SADVLSNSEFYLAECNVKPRK---CKYKLLKSSNRICIRCEH--ELPVHAGVGIcp-</p>          |
| 280 | <p><b>1h8xA</b><br/>(125)</p> <hr/> <p><b>1oncA</b><br/>(104)</p> | N | 24.04 | <p><b>TM-align:</b> aliSize=87 (resi) RMSD=2.59 (Å)<br/> kesaaakferqhmdsgnsp-----SssSTYCNQMRRRNMTQgrCKPVNTFVHEPLVDVQNVCFQekvtckngq--GNCYKSNSSMHITDCRLTNGSRypnCAVRTSOKERHIIVACEGspYVPVHFDAASVE-<br/> -----dwltfqkhhitntR--DVDCDNLMPSTSLF--D--CKDKNTFIYSRPEPKAICKGI IAS-----iaSKNVLTTSEFYLSDCNVTISRP----CKYKLLKSTNKFCVTCEN--QAPVHVGVSgc</p> <p><b>SARST:</b> aliSize=97 (resi) RMSD=12.76 (Å)<br/> kesa--AAKFERQHMDSGNSpsSSSTYCNQMRRRNMTqgrcPVPNTFVHEPLVDVQNVCFQEKVTckngqGNCYKSNSSMHITDCRLTngsryPNC-AVRTSOKERHIIVACEGspYVPVHFDAAS---ve<br/> ---xdWLTQKHHIT-NT--RDVDCDNLMPSTSLFHC-----CKDKNTFIYSRPEPKAICKGI IAS-----KNVLTSEFYLSDCNVTISRPCKYKLLKSTNKFCVTCEN--QAPVHVGVSgc--</p> <p><b>BLAST:</b> aliSize=52 (resi) iden=28.85% (30/104) simi=50.00% (52/104)<br/> kesaaak-----ERQHMDSGNSpsSSSTYCNQMRRRNMTQgrCKPVNTFVHEPLVDVQNVCFQEKVTCKngqncYKSNSSMHITDCRLTngSRypnCAVRTSOKERHIIVACEGspYVPVHF-----dasve<br/> -----xdwltQKHHITN-----TRDVCNLMSTSLFHC--CKDKNTFIYSRPEPKAICKGI IAS-----VLTSEFYLSDCNVTISRPCKYKLLKSTNKFCVTCENQ--APVHVGVSgc-----</p> <p><b>Proposed:</b> aliSize=97 (resi) RMSD=1.65 (Å)<br/> keSAAKFERQHMDSGNSP--sssstyCNQMRRRNMTQgrCKPVNTFVHEPLVDVQNVCF---qekvtckngqGNCYKSNSSMHITDCRLTNGSRypnCAVRTSOKERHIIVACEGspYVPVHFDAASV---e<br/> --PDWLTQKHHIT-NTRDv-----DCDNLMPSTSLFHC--CKDKNTFIYSRPEPKAICKGI IAS-----SKNVLTTSEFYLSDCNVTISRP----CKYKLLKSTNKFCVTCEN--QAPVHVGVSgc-</p> |
| 281 | <p><b>1h8xA</b><br/>(125)</p> <hr/> <p><b>1qwqA</b><br/>(124)</p> | N | 70.97 | <p><b>TM-align:</b> aliSize=104 (resi) RMSD=2.24 (Å)<br/> kesaaakferqhmdsgns-----PSSTYCNQMRRRNMTQGRCKPVNTFVHEPLVDVQNVCFQEKVTckngq--GNCYKSNSSMHITDCRLTNGSRYPNCAYRTSOKERHIIVACEGspYVPVHFDAASVe<br/> -----kesaaakferqhmdsgnsPSSSNYCNLMCCRKMTOGKCKPVNTFVHESLADYKAVCSQKKVTG--KdgqTNCYQSKSTMRTDCREIGSSKYPNCAYKTTVEKHIIVACGGKPSVPVHFDAASV-</p> <p><b>SARST:</b> aliSize=99 (resi) RMSD=2.15 (Å)<br/> kesaaakferqhmdsgnspssstycnqmmrrrnmqtqgrcPVPNTFVHEPLVDVQNVCFQEKVTCKngqGNCYKSNSSMHITDCRLTNGSRYPNCAYRTSOKERHIIVACEGspYVPVHFDAAS---ve<br/> -----kesaaakferqhmdsgnspsssnYCNLMCCRKMTOGKCKPVNTFVHESLADYKAVCSQKKVTG--KdgqTNCYQSKSTMRTDCREIGSSKYPNCAYKTTVEKHIIVACGGKPSVPVHFDAASv--</p> <p><b>BLAST:</b> aliSize=105 (resi) iden=76.61% (95/124) simi=84.68% (105/124)<br/> KESAAAKFERQHMDSGNSPSSTYCNQMRRRNMTQGRCKPVNTFVHEPLVDVQNVCFQEKVTCKngqGNCYKSNSSMHITDCRLTNGSRYPNCAYRTSOKERHIIVACEGspYVPVHFDAASVe<br/> KESAAAKFERQHMDSGNSPSSSNYCNLMCCRKMTOGKCKPVNTFVHESLADYKAVCSQKKVTG--KdgqTNCYQSKSTMRTDCREIGSSKYPNCAYKTTVEKHIIVACGGKPSVPVHFDAASV-</p> <p><b>Proposed:</b> aliSize=118 (resi) RMSD=1.68 (Å)<br/> KESAAAKFERQHMDSGN--spsSSS--TYCNQMRRRNMTQGRCKPVNTFVHEPLVDVQNVCFQEKVTckngq--GNCYKSNSSMHITDCRLT--ngSRYPNCAYRTSOKERHIIVACEGspYVPVHFDAASVe<br/> KESAAAKFERQHMDSGN--spsSSSNYCNLMCCRKMTOGKCKPVNTFVHESLADYKAVCSQKKVTG--KdgqTNCYQSKSTMRTDCREIG--SSKYPNCAYKTTVEKHIIVACGGKPSVPVHFDAASV-</p>   |

|     |                                                     |   |       |                                                                                                                                                                                                                                                                                                                                                                                                                                                                                                                                                                                                                                                                                                                                                                                                                                                                                                                                                                                                                                                                                                                                                                                                                                                                                                                                                                                                                                                         |
|-----|-----------------------------------------------------|---|-------|---------------------------------------------------------------------------------------------------------------------------------------------------------------------------------------------------------------------------------------------------------------------------------------------------------------------------------------------------------------------------------------------------------------------------------------------------------------------------------------------------------------------------------------------------------------------------------------------------------------------------------------------------------------------------------------------------------------------------------------------------------------------------------------------------------------------------------------------------------------------------------------------------------------------------------------------------------------------------------------------------------------------------------------------------------------------------------------------------------------------------------------------------------------------------------------------------------------------------------------------------------------------------------------------------------------------------------------------------------------------------------------------------------------------------------------------------------|
| 282 | <p>1h8xA<br/>(125)</p> <hr/> <p>1yv7A<br/>(102)</p> | N | 24.51 | <p><b>TM-align:</b> aliSize=86 (resi) RMSD=2.50 (Å)<br/> kesaaakferqhmdsgnsp-----SssSTYCNQMRRRNMtqgrCKPVNTFVHEPLVDVQNVCFQEKVtckngq--GNCYKSNSSMHITDCRLTNGSRypnCAVRTSOKERHIIVACEGspYVPVHFDASe<br/> -----dwltfgkkhitntR--DVDCDNI--STNLFH---CKDKNTHIYSRPEPKAICKG-I-----iaSKNVLTTSEFYLSDCNVT--SRP----CKYKLLKSTNKFSVTCEN--QAPVHFVGVG-</p> <p><b>SARST:</b> aliSize=96 (resi) RMSD=12.82 (Å)<br/> kesa-AAKFERQHMDsGNSpsSSSTYCNQMRRRNMtqgrCKPVNTFVHEPLVDVQNVCFQEKVtckngqGNCYKSNSSMHITDCRLTNGSRypnCAVRTSOKERHIIVACEGspYVPVHFDA--sve<br/> ---dWLTfQKKHIT-NT---RDVDCDNI--STNLFH---CKDKNTHIYSRPEPKAICKGIIAS-----KNVLTSEFYLSDCNVT--SRPcKYKLLKSTNKFSVTCEN--QAPVHFVGVG---</p> <p><b>BLAST:</b> aliSize=52 (resi) iden=29.70% (30/102) simi=51.49% (52/102)<br/> kesaaak----FERQHMDsgnspSSSTYCNQMRRRNMtqgrCKPVNTFVHEPLVDVQNVCFQEKVtckngqGNCYKSNSSMHITDCRLTNGSRypnCAVRTSOKERHIIVACEGspYVPVHF----dasve<br/> -----dwltfgkkhitnt---TRDVDCDNI--STNLFH---CKDKNTHIYSRPEPKAIC-KGIIASKN-----VLTSEFYLSDCNVT--SR--CKYKLLKSTNKFSVTCENQ--APVHFVGVG-----</p> <p><b>Proposed:</b> aliSize=97 (resi) RMSD=1.67 (Å)<br/> keSAAAKFERQHMDsGNSP-ssstYCNQMRRRNMtqgrCKPVNTFVHEPLVDVQNVCF---qekvtckngqGNCYKSNSSMHITDCRLTNGSRypnCAVRTSOKERHIIVACEGspYVPVHFDASe<br/> --PDWLTfQKKHITN-TRDv----DNDNI--STNLFH---CKDKNTHIYSRPEPKAICKgiia-----SKNVLTTSEFYLSDCNVT--SRP----CKYKLLKSTNKFSVTCEN--QAPVHFVGVG-</p>                                                                                          |
| 283 | <p>1h8xA<br/>(125)</p> <hr/> <p>2aasA<br/>(124)</p> | N | 70.16 | <p><b>TM-align:</b> aliSize=105 (resi) RMSD=1.88 (Å)<br/> kesaaakferqhmdsgnsp-----SSSSTYCNQMRRRNMtqgrCKPVNTFVHEPLVDVQNVCFQEKVtckngqGNCYKSNSSMHITDCRLTNGSRYPNCAVRTSOKERHIIVACEGSPYVPVHFDASe<br/> -----ketaaakferqhmdsstsaASSSNYCNQMKSRNLTKDRCKPVNTFVHESLADVQAVCSQKNACKNGGTNCYOSYSTMSITDCRETGSSKYPNCAKTTQANKHIIVACEGNPYVPVHFDASe</p> <p><b>SARST:</b> aliSize=118 (resi) RMSD=14.39 (Å)<br/> k-ESAAAKFERQHMDSGN---SPSSSTYCNQMRRRNMtqgrCKPVNTFVHEPLVDVQNVCFQEKVtckngqGNCYKSNSSMHITDCRLTNGSRYPNCAVRTSOKERHIIVACEGSPYVPVHFDASe-ve<br/> -kETAaakFERQHMDSGSTsaASSN---NYCNQMKSRNLTKDRCKPVNTFVHESLADVQAVCSQKNACKNGGTNCYOSYSTMSITDCRETGSSKYPNCAKTTQANKHIIVACEGNPYVPVHFDASev--</p> <p><b>BLAST:</b> aliSize=104 (resi) iden=73.39% (91/124) simi=83.87% (104/124)<br/> KESAAAKFERQHMDSGNSPSSSTYCNQMRRRNMtqgrCKPVNTFVHEPLVDVQNVCFQEKVtckngqGNCYKSNSSMHITDCRLTNGSRYPNCAVRTSOKERHIIVACEGSPYVPVHFDASe<br/> KETAAAKFERQHMDSGSTsaASSSNYCNQMKSRNLTKDRCKPVNTFVHESLADVQAVCSQKNACKNGGTNCYOSYSTMSITDCRETGSSKYPNCAKTTQANKHIIVACEGNPYVPVHFDASe-</p> <p><b>Proposed:</b> aliSize=120 (resi) RMSD=1.32 (Å)<br/> KESAAAKFERQHMDSGN-SPSSS--tYCNQMRRRNMtqgrCKPVNTFVHEPLVDVQNVCFQEKVtckngqGNCYKSNSSMHITDCRLTNGSRYPNCAVRTSOKERHIIVACEGSPYVPVHFDASe<br/> KETAAAKFERQHMDSGSTsaA--SSsn-YCNQMKSRNLTKDRCKPVNTFVHESLADVQAVCSQKNACK-NGTNCYOSYSTMSITDCRETGSSKYPNCAKTTQANKHIIVACEGNPYVPVHFDASe-</p>                                                                                             |
| 284 | <p>1h8xA<br/>(125)</p> <hr/> <p>2hkyA<br/>(129)</p> | N | 33.60 | <p><b>TM-align:</b> aliSize=95 (resi) RMSD=1.94 (Å)<br/> kesaaakferqhmdsgnspssss-----TYCNQMRRRNMtqgrCKPVNTFVHEPLVDVQNVCFQEKVtckngq--G--NCYKSNSSMHITDCRLTNGSRYPNCAVRTSOKERHIIVACEGS-----PYVPVHFDASe<br/> -----mkpkgmtssqwfkiqhmqpsPQACNSAMK--NINKhtKRCKDLNTHLHEPFSSAAATQTPKIAAC---KngDkNCHQSHGVPVSLTMCKLT--SGKYPNCRKEKRONKSYVVACKPPqkksqQFHLVPVHLDRVL-</p> <p><b>SARST:</b> aliSize=114 (resi) RMSD=14.12 (Å)<br/> k----ESAAAKFERQHMDSGNSPSSSTYCNQMRRRNMtqgrCKPVNTFVHEPLVDVQNVCFQEKVtckngqGNCYKSNSSMHITDCRLTNGSRYPNCAVRTSOKERHIIVACE-----GSPYVPVHFDASe-ve<br/> -mkpkgMTSSQWFKIQHMQSPQACNS---AMKNINKhtKRCKDL---NTHLHEPFSSAAATQTPKIAACKNGDKNCHQSHGVPVSLTMCKLTSGKY--PNCRKEKRONKSYVVACKppqkksqQFHLVPVHLDRV1--</p> <p><b>BLAST:</b> aliSize=68 (resi) iden=37.60% (47/125) simi=54.40% (68/125)<br/> kesaaak-----FERQHMDsgnSPSSSTYCNQMRRRNMtqgrCKPVNTFVHEPLVDVQNVCFQEKVtckngqGNCYKSNSSMHITDCRLTNGSRYPNCAVRTSOKERHIIVACE-----EGSPY--VPVHF----asve<br/> -----mkpkgmtssqwfkiqhmqpsPQACNSAMKNI--KHTKRCKDLNTHLHEPFSSAAATQTPKIAACKNGDKNCHQSHGVPVSLTMCKLTSG--KYPNCRKEKRONKSYVVACKppqkksqQFHLVPVHLDRV1----</p> <p><b>Proposed:</b> aliSize=111 (resi) RMSD=1.78 (Å)<br/> ---ESAAAKFERQHMDSGN-SPSSSTYCNQMRRRNMtqgrCKPVNTFVHEPLVDVQNVCFQEKVtckngq--G--NCYKSNSSMHITDCRLTNGSRYPNCAVRTSOKERHIIVACEGS-----PYVPVHFDASe<br/> mkpkgMTSSQWFKIQHMQSPQ-----ACNSAMK--NINKhtKRCKDLNTHLHEPFSSAAATQTPKIAAC---KngDkNCHQSHGVPVSLTMCKLT--SGKYPNCRKEKRONKSYVVACKPPqkksqQFHLVPVHLDRVL-</p> |

|     |                                               |   |       |                                                                                                                                                                                                                                                                                                                                                                                                                                                                                                                                                                                                                                                                                                                                                                                                                                                                                                                                                                                                                                                                                                                                                                                                                                                                                                                                                                                                    |
|-----|-----------------------------------------------|---|-------|----------------------------------------------------------------------------------------------------------------------------------------------------------------------------------------------------------------------------------------------------------------------------------------------------------------------------------------------------------------------------------------------------------------------------------------------------------------------------------------------------------------------------------------------------------------------------------------------------------------------------------------------------------------------------------------------------------------------------------------------------------------------------------------------------------------------------------------------------------------------------------------------------------------------------------------------------------------------------------------------------------------------------------------------------------------------------------------------------------------------------------------------------------------------------------------------------------------------------------------------------------------------------------------------------------------------------------------------------------------------------------------------------|
| 285 | <p>1h8xA<br/>(125)</p> <p>2k11A<br/>(127)</p> | N | 89.60 | <p><b>TM-align:</b> aliSize=104 (resi) RMSD=1.73 (Å)<br/> kesaaakferqhmdsgn-----SPSSsSTYCNQMMRRRNMTQGRCKPVNTFVHEPLVDVQNVCFQEKVTCknGQ-G-NCYKSNSSSMHITDCRLTNGSRYPCAYRTSQKERHIIVACEGSPYVPVHFDAVHE--<br/> -----kesrakkfqrqhmdsdspsSSS--STYCNQMMRRRNMTQGRCKPVNTFVHEPLVDVQNVCFQEKVTC--KNgQgNCYKSNSSSMHITDCRLTNGSRYPCAYRTSQKERHIIVACEGSPYVPVHFDAVHEds</p> <p><b>SARST:</b> aliSize=101 (resi) RMSD=2.03 (Å)<br/> kesaaakferqhmdsgnspss-----SSTYCNQMMRRRNMTQGRCKPVNTFVHEPLVDVQNVCFQEKVTCNGGQNCYKSNSSSMHITDCRLTNGSRYPCAYRTSQKERHIIVACEGSPYVPVHFDA-----sve<br/> -----kesrakkfqrqhmdsdspsSSSTYCNQMMRRRNMTQGRCKPVNTFVHEPLVDVQNVCFQEKVTCNGGQNCYKSNSSSMHITDCRLTNGSRYPCAYRTSQKERHIIVACEGSPYVPVHFDAsveds---</p> <p><b>BLAST:</b> aliSize=121 (resi) iden=95.20% (119/125) simi=96.80% (121/125)<br/> KESAAAKFERQHMDSGNSPSSSTYCNQMMRRRNMTQGRCKPVNTFVHEPLVDVQNVCFQEKVTCNGGQNCYKSNSSSMHITDCRLTNGSRYPCAYRTSQKERHIIVACEGSPYVPVHFDAVHE--<br/> KESRAKFKFQHQHMDSDSSPSSSTYCNQMMRRRNMTQGRCKPVNTFVHEPLVDVQNVCFQEKVTCNGGQNCYKSNSSSMHITDCRLTNGSRYPCAYRTSQKERHIIVACEGSPYVPVHFDAVHEds</p> <p><b>Proposed:</b> aliSize=122 (resi) RMSD=1.58 (Å)<br/> KESAAAKFERQHMDS-GNSpSSSTYCNQMMRRRNMTQGRCKPVNTFVHEPLVDVQNVCFQEKVTCknGQ-G-NCYKSNSSSMHITDCRLTNGSRYPCAYRTSQKERHIIVACEGSPYVPVHFDAVHE--<br/> KESRAKFKFQHQHMDSDSSP-SSSTYCNQMMRRRNMTQGRCKPVNTFVHEPLVDVQNVCFQEKVTC--KNgQgNCYKSNSSSMHITDCRLTNGSRYPCAYRTSQKERHIIVACEGSPYVPVHFDAVHEds</p> |
| 286 | <p>1jmlA<br/>(72)</p> <p>1k52A<br/>(72)</p>   | C | 87.50 | <p><b>TM-align:</b> aliSize=60 (resi) RMSD=1.69 (Å)<br/> mhHHHHGM--EETIKANLIFANGSTQTAEFKGTFEKATSEAYAYADTLKKNNGEWTVDVVPKAYtlnikfag-----<br/> --MHHHHHamEETIKANLIFANGSTQTAEFKGTFEKATSEAYAYADTLKKNNGEWTVDVADG-----gytlnikfag</p> <p><b>SARST:</b> aliSize=69 (resi) RMSD=11.31 (Å)<br/> mh--HHHHGMEEVTIKANLIFANGSTQTAEFKGTFEKATSEAYAYADTLKKNNGEWTVDVVPKAYTLNKFAG-g<br/> --mhHHHHHamEEVTIKANLIFANGSTQTAEFKGTFEKATSEAYAYADTLKKNNGEWTVDVADGGYTLNKFAG-g-</p> <p><b>BLAST:</b> aliSize=67 (resi) iden=93.06% (67/72) simi=93.06% (67/72)<br/> MHHHHHGMEEVTIKANLIFANGSTQTAEFKGTFEKATSEAYAYADTLKKNNGEWTVDVVPKAYTLNKFAG<br/> MHHHHHamEEVTIKANLIFANGSTQTAEFKGTFEKATSEAYAYADTLKKNNGEWTVDVADGGYTLNKFAG</p> <p><b>Proposed:</b> aliSize=70 (resi) RMSD=1.58 (Å)<br/> mhHHHHGM--EETIKANLIFANGSTQTAEFKGTFEKATSEAYAYADTLKKNNGEWTVDVVPKAYTLNKFAG<br/> --MHHHHHamEETIKANLIFANGSTQTAEFKGTFEKATSEAYAYADTLKKNNGEWTVDVADGGYTLNKFAG</p>                                                                                                                                                                                                                                                                                                                                                                                                                                                                                     |
| 287 | <p>1jmlA<br/>(72)</p> <p>1k53A<br/>(72)</p>   | C | 87.50 | <p><b>TM-align:</b> aliSize=60 (resi) RMSD=1.67 (Å)<br/> mhHHHHGM--EETIKANLIFANGSTQTAEFKGTFEKATSEAYAYADTLKKNNGEWTVDVVPKAYtlnikfag-----<br/> --MHHHHHamEETIKANLIFANASTQTAEFKGTFEKATSEAYAYADTLKKNNGEWTVDVADK-----gytlnikfag</p> <p><b>SARST:</b> aliSize=69 (resi) RMSD=11.32 (Å)<br/> mh--HHHHGMEEVTIKANLIFANGSTQTAEFKGTFEKATSEAYAYADTLKKNNGEWTVDVVPKAYTLNKFAG-g<br/> --mhHHHHHamEEVTIKANLIFANASTQTAEFKGTFEKATSEAYAYADTLKKNNGEWTVDVADKGYTLNKFAG-g-</p> <p><b>BLAST:</b> aliSize=67 (resi) iden=93.06% (67/72) simi=93.06% (67/72)<br/> MHHHHHGMEEVTIKANLIFANGSTQTAEFKGTFEKATSEAYAYADTLKKNNGEWTVDVVPKAYTLNKFAG<br/> MHHHHHamEEVTIKANLIFANASTQTAEFKGTFEKATSEAYAYADTLKKNNGEWTVDVADKGYTLNKFAG</p> <p><b>Proposed:</b> aliSize=70 (resi) RMSD=1.56 (Å)<br/> mhHHHHGM--EETIKANLIFANGSTQTAEFKGTFEKATSEAYAYADTLKKNNGEWTVDVVPKAYTLNKFAG<br/> --MHHHHHamEETIKANLIFANASTQTAEFKGTFEKATSEAYAYADTLKKNNGEWTVDVADKGYTLNKFAG</p>                                                                                                                                                                                                                                                                                                                                                                                                                                                                                     |



|     |                                                   |   |       |                                                                                                                                                                                                                                                                                                                                                                                                                                                                                                                                                                                                                                                                                                                                                                                                                                                                                                           |
|-----|---------------------------------------------------|---|-------|-----------------------------------------------------------------------------------------------------------------------------------------------------------------------------------------------------------------------------------------------------------------------------------------------------------------------------------------------------------------------------------------------------------------------------------------------------------------------------------------------------------------------------------------------------------------------------------------------------------------------------------------------------------------------------------------------------------------------------------------------------------------------------------------------------------------------------------------------------------------------------------------------------------|
| 288 | <p>1jmlA<br/>(72)</p> <hr/> <p>1xcqL<br/>(66)</p> | C | 54.55 | <p><b>TM-align:</b> aliSize=56 (resi) RMSD=1.86 (Å)<br/> mhhhhhGMEVTTIKANLIFANGSTQTAEFKGTFEKATSEAYAYADTLKNDNGEWTVDVVPK-Aytlnikfag-----<br/> -----PKEEVTIKVNLIFADGKIQTAEFKGTFEETAEAYRYAALHAKVNGEWTALEDGGN-----hmnikfagk</p> <p><b>SARST:</b> aliSize=49 (resi) RMSD=1.23 (Å)<br/> mhhhhhGMEVTTIKANLIFANGSTQTAEFKGTFEKATSEAYAYADTLKNDNGEWTVDVVPKAYtlnikfag<br/> -----PKEEVTIKVNLIFADGKIQTAEFKGTFEETAEAYRYAALHAKVNGEWTALEDGGNhmnikfagk-----</p> <p><b>BLAST:</b> aliSize=47 (resi) iden=63.64% (42/66) simi=71.21% (47/66)<br/> mhhhhhgm--EVTIKANLIFANGSTQTAEFKGTFEKATSEAYAYADTLKNDNGEWTVDVVPKAYTLNIKFAK-<br/> -----pkEEVTIKVNLIFADGKIQTAEFKGTFEETAEAYRYAALHAKVNGEWTALEDGGNHMNKFAK</p> <p><b>Proposed:</b> aliSize=65 (resi) RMSD=1.40 (Å)<br/> mhhhhhGMEVTTIKANLIFANGSTQTAEFKGTFEKATSEAYAYADTLKNDNGEWTVDVVPKA-YTLNIKFAK<br/> -----PKEEVTIKVNLIFADGKIQTAEFKGTFEETAEAYRYAALHAKVNGEWTALEDGGNHMNKFAK</p>        |
| 289 | <p>1jmlA<br/>(72)</p> <hr/> <p>1xcqM<br/>(62)</p> | C | 66.13 | <p><b>TM-align:</b> aliSize=52 (resi) RMSD=1.42 (Å)<br/> mhhhhhgmEEVTTIKANLIFANGSTQTAEFKGTFEKATSEAYAYADTLKNDNGEWTVDVVPKaytlnikfag-----<br/> -----EVTIKVNLIFADGKIQTAEFKGTFEETAEAYRYAALHAKVNGEWTALEDG-----gnhmnikfag</p> <p><b>SARST:</b> aliSize=48 (resi) RMSD=1.07 (Å)<br/> mhhhhhgmEEVTTIKANLIFANGSTQTAEFKGTFEKATSEAYAYADTLKNDNGEWTVDV-----vpkaytlnikfag<br/> -----EVTIKVNLIFADGKIQTAEFKGTFEETAEAYRYAALHAKVNGEWTALEDGGNHmnikfag-----</p> <p><b>BLAST:</b> aliSize=46 (resi) iden=66.13% (41/62) simi=74.19% (46/62)<br/> mhhhhhgmEEVTTIKANLIFANGSTQTAEFKGTFEKATSEAYAYADTLKNDNGEWTVDVVPKAYTLNIKFAK<br/> -----EVTIKVNLIFADGKIQTAEFKGTFEETAEAYRYAALHAKVNGEWTALEDGGNHMNKFAK</p> <p><b>Proposed:</b> aliSize=62 (resi) RMSD=1.28 (Å)<br/> mhhhhhgmEEVTTIKANLIFANGSTQTAEFKGTFEKATSEAYAYADTLKNDNGEWTVDVVPKAYTLNIKFAK<br/> -----EVTIKVNLIFADGKIQTAEFKGTFEETAEAYRYAALHAKVNGEWTALEDGGNHMNKFAK</p>                 |
| 290 | <p>1jmlA<br/>(72)</p> <hr/> <p>1xcqN<br/>(64)</p> | C | 65.63 | <p><b>TM-align:</b> aliSize=54 (resi) RMSD=1.58 (Å)<br/> mhhhhhGMEVTTIKANLIFANGSTQTAEFKGTFEKATSEAYAYADTLKNDNGEWTVDVVP--Kaytlnikfag-----<br/> -----KEEVTIKVNLIFADGKIQTAEFKGTFEETAEAYRYAALHAKVNGEWTALEDGGN-----hmnikfag</p> <p><b>SARST:</b> aliSize=46 (resi) RMSD=1.05 (Å)<br/> mhhhhhGmee---VTTIKANLIFANGSTQTAEFKGTFEKATSEAYAYADTLKNDNGEWTVDV-----vvpkaytlnikfag<br/> -----keeVTTIKVNLIFADGKIQTAEFKGTFEETAEAYRYAALHAKVNGEWTALEDGGNhmnikfag-----</p> <p><b>BLAST:</b> aliSize=47 (resi) iden=65.62% (42/64) simi=73.44% (47/64)<br/> mhhhhhgm--EVTIKANLIFANGSTQTAEFKGTFEKATSEAYAYADTLKNDNGEWTVDVVPKAYTLNIKFAK<br/> -----kEEVTIKVNLIFADGKIQTAEFKGTFEETAEAYRYAALHAKVNGEWTALEDGGNHMNKFAK</p> <p><b>Proposed:</b> aliSize=62 (resi) RMSD=1.28 (Å)<br/> mhhhhhgm--EVTIKANLIFANGSTQTAEFKGTFEKATSEAYAYADTLKNDNGEWTVDVVP-KAYTLNIKFAK<br/> -----kEEVTIKVNLIFADGKIQTAEFKGTFEETAEAYRYAALHAKVNGEWTALEDG-GNHMNKFAK</p> |

|     |                                               |   |       |                                                                                                                                                                                                                                                                                                                                                                                                                                                                                                                                                                                                                                                                                                                                                                                                                                                                                                                                                                                                                                                                                                                                                                                                                                                                                                   |
|-----|-----------------------------------------------|---|-------|---------------------------------------------------------------------------------------------------------------------------------------------------------------------------------------------------------------------------------------------------------------------------------------------------------------------------------------------------------------------------------------------------------------------------------------------------------------------------------------------------------------------------------------------------------------------------------------------------------------------------------------------------------------------------------------------------------------------------------------------------------------------------------------------------------------------------------------------------------------------------------------------------------------------------------------------------------------------------------------------------------------------------------------------------------------------------------------------------------------------------------------------------------------------------------------------------------------------------------------------------------------------------------------------------|
| 291 | <p>1jmlA<br/>(72)</p> <p>1xf5M<br/>(67)</p>   | C | 55.22 | <p>TM-align: aliSize=53 (resi) RMSD=1.75 (Å)<br/> mhhhhhgm-----EVTIKANLIFANGSTQTAEFKGTFEKATSEAYAYADTKKDNGEWTVVVPK-AytlNIKfag-----<br/> -----epkeEVTIKVNLIFADGKIQTAEFKGTFEATAEAYRYADLLAKVNGEWIADLEGGN-----cmnikfagk</p> <p>SARST: aliSize=59 (resi) RMSD=11.70 (Å)<br/> mhhhhhgmeev-----TIKANLIFANGSTQTAEFKGTFEKATSEAYAYADTKKDNGEWTVVVPKAYTLNKFAG--g<br/> -----epkeevTIKVNLIADGKIQTAEFKGTFEATAEAYRYADLLAKVNGEWIADLEGGNCMNIFAGk-</p> <p>BLAST: aliSize=49 (resi) iden=65.67% (44/67) simi=73.13% (49/67)<br/> mhhhhhgm-----EVTIKANLIFANGSTQTAEFKGTFEKATSEAYAYADTKKDNGEWTVVVPKAYTLNKFAG--<br/> -----epkEVTIKVNLIFADGKIQTAEFKGTFEATAEAYRYADLLAKVNGEWIADLEGGNCMNIFAGk</p> <p>Proposed: aliSize=62 (resi) RMSD=1.17 (Å)<br/> mhhhhhgm-----EVTIKANLIFANGSTQTAEFKGTFEKATSEAYAYADTKKDNGEWTVVVPK-AYTLNIFAG<br/> -----epkeEVTIKVNLIFADGKIQTAEFKGTFEATAEAYRYADLLAKVNGEWIADLEGGNCMNIFAGk</p>                                                                                                                                                                                                                                                                                                                                                                                                                   |
| 292 | <p>1js0A<br/>(124)</p> <p>1a5pA<br/>(124)</p> | C | 98.39 | <p>TM-align: aliSize=114 (resi) RMSD=1.05 (Å)<br/> KETAAAKFERQHDSSTSAASSSNYNQMMKSRNLTKDRCKPVNTFVHESLADVOAVCSQKNVACKNGOTNCSYSTMSITDCRETGSSKYPNCAYKTTQANKHIIVACEGNFyvpvhfdasv-----<br/> KETAAAKFERQHDSSTSAASSSNYNQMMKSRNLTKDRCKPVNTFVHESLADVOAVCSQKNVACKNGOTNCSYSTMSITDCRETGSSKYPNAAAYKTTQANKHIIVACEGNF-----yvpvhfdasv</p> <p>SARST: aliSize=122 (resi) RMSD=6.23 (Å)<br/> k-ETAAAKFERQHDSSTSAASSSNYNQMMKSRNLTKDRCKPVNTFVHESLADVOAVCSQKNVACKNGOTNCSYSTMSITDCRETGSSKYPNCAYKTTQANKHIIVACEGNPYVPVHFDAS-v<br/> -kETAAAKFERQHDSSTSAASSSNYNQMMKSRNLTKDRCKPVNTFVHESLADVOAVCSQKNVACKNGOTNCSYSTMSITDCRETGSSKYPNAAAYKTTQANKHIIVACEGNPYVPVHFDASv-</p> <p>BLAST: aliSize=122 (resi) iden=98.39% (122/124) simi=98.39% (122/124)<br/> KETAAAKFERQHDSSTSAASSSNYNQMMKSRNLTKDRCKPVNTFVHESLADVOAVCSQKNVACKNGOTNCSYSTMSITDCRETGSSKYPNCAYKTTQANKHIIVACEGNPYVPVHFDASV<br/> KETAAAKFERQHDSSTSAASSSNYNQMMKSRNLTKDRCKPVNTFVHESLADVOAVCSQKNVACKNGOTNCSYSTMSITDCRETGSSKYPNAAAYKTTQANKHIIVACEGNPYVPVHFDASV</p> <p>Proposed: aliSize=124 (resi) RMSD=0.61 (Å)<br/> KETAAAKFERQHDSSTSAASSSNYNQMMKSRNLTKDRCKPVNTFVHESLADVOAVCSQKNVACKNGOTNCSYSTMSITDCRETGSSKYPNCAYKTTQANKHIIVACEGNPYVPVHFDASV<br/> KETAAAKFERQHDSSTSAASSSNYNQMMKSRNLTKDRCKPVNTFVHESLADVOAVCSQKNVACKNGOTNCSYSTMSITDCRETGSSKYPNAAAYKTTQANKHIIVACEGNPYVPVHFDASV</p> |
| 293 | <p>1js0A<br/>(124)</p> <p>1a5qA<br/>(124)</p> | C | 99.19 | <p>TM-align: aliSize=114 (resi) RMSD=1.02 (Å)<br/> KETAAAKFERQHDSSTSAASSSNYNQMMKSRNLTKDRCKPVNTFVHESLADVOAVCSQKNVACKNGOTNCSYSTMSITDCRETGSSKYPNCAYKTTQANKHIIVACEGNFyvpvhfdasv-----<br/> KETAAAKFERQHDSSTSAASSSNYNQMMKSRNLTKDRCKPVNTFVHESLADVOAVCSQKNVACKNGOTNCSYSTMSITDCRETGSSKYPNAAAYKTTQANKHIIVACEGNF-----yvpvhfdasv</p> <p>SARST: aliSize=122 (resi) RMSD=6.21 (Å)<br/> k-ETAAAKFERQHDSSTSAASSSNYNQMMKSRNLTKDRCKPVNTFVHESLADVOAVCSQKNVACKNGOTNCSYSTMSITDCRETGSSKYPNCAYKTTQANKHIIVACEGNPYVPVHFDAS-v<br/> -kETAAAKFERQHDSSTSAASSSNYNQMMKSRNLTKDRCKPVNTFVHESLADVOAVCSQKNVACKNGOTNCSYSTMSITDCRETGSSKYPNAAAYKTTQANKHIIVACEGNPYVPVHFDASv-</p> <p>BLAST: aliSize=123 (resi) iden=99.19% (123/124) simi=99.19% (123/124)<br/> KETAAAKFERQHDSSTSAASSSNYNQMMKSRNLTKDRCKPVNTFVHESLADVOAVCSQKNVACKNGOTNCSYSTMSITDCRETGSSKYPNCAYKTTQANKHIIVACEGNPYVPVHFDASV<br/> KETAAAKFERQHDSSTSAASSSNYNQMMKSRNLTKDRCKPVNTFVHESLADVOAVCSQKNVACKNGOTNCSYSTMSITDCRETGSSKYPNAAAYKTTQANKHIIVACEGNPYVPVHFDASV</p> <p>Proposed: aliSize=124 (resi) RMSD=0.60 (Å)<br/> KETAAAKFERQHDSSTSAASSSNYNQMMKSRNLTKDRCKPVNTFVHESLADVOAVCSQKNVACKNGOTNCSYSTMSITDCRETGSSKYPNCAYKTTQANKHIIVACEGNPYVPVHFDASV<br/> KETAAAKFERQHDSSTSAASSSNYNQMMKSRNLTKDRCKPVNTFVHESLADVOAVCSQKNVACKNGOTNCSYSTMSITDCRETGSSKYPNAAAYKTTQANKHIIVACEGNPYVPVHFDASV</p> |

|     |                                                     |   |       |                                                                                                                                                                                                                                                                                                                                                                                                                                                                                                                                                                                                                                                                                                                                                                                                                                                                                                                                                                                                                                                                                                                                                                                                                                                                                                                                                                                                |
|-----|-----------------------------------------------------|---|-------|------------------------------------------------------------------------------------------------------------------------------------------------------------------------------------------------------------------------------------------------------------------------------------------------------------------------------------------------------------------------------------------------------------------------------------------------------------------------------------------------------------------------------------------------------------------------------------------------------------------------------------------------------------------------------------------------------------------------------------------------------------------------------------------------------------------------------------------------------------------------------------------------------------------------------------------------------------------------------------------------------------------------------------------------------------------------------------------------------------------------------------------------------------------------------------------------------------------------------------------------------------------------------------------------------------------------------------------------------------------------------------------------|
| 294 | <p>1js0A<br/>(124)</p> <hr/> <p>lawzA<br/>(123)</p> | C | 27.64 | <p><b>TM-align:</b> aliSize=107 (resi) RMSD=2.31 (Å)<br/> KE-TAAAKFERQHMDSSSTAAsSSNYCNQMMKSRNLTKDRCKPVNTFVHESLADVOAVCS---QKNVackngqTNCYQSYSTMSITDRETSSSKYPNCAYKTTQANKHIIVACEGNPYvpvhfdasv-----<br/> QDnSRYTHLTOHYDAKPOGR-DDRYCESIMRRRGLTS-PCKDINTFIHGKRSIKAIICENkGNPHR-----ENLRISKSSFOVITKLGHGSPWPCQYRATAGFRNVVACENGL-----pvhldqsifrrp</p> <p><b>SARST:</b> aliSize=104 (resi) RMSD=2.84 (Å)<br/> ket---AAAKFERQHMDSSSTAAsSSNYCNQMMKSRNLTKDRCKPVNTFVHESLADVOAVCSQKNVackngqTNCYQSYSTMSITDRETSSSKYPNCAYKTTQANKHIIVACE-----gnpyvpvhfdasv<br/> ---qdnsRYTHLTOHYDAKPOGR-DDRYCESIMRRRGLTS-SCKDINTFIHGKRSIKAIICENkGNP--HRENLRISKSSFOVITKLGHGSPWPCQYRATAGFRNVVACENGLpvhldqsifrrp-----</p> <p><b>BLAST:</b> aliSize=61 (resi) iden=32.52% (40/123) simi=49.59% (61/123)<br/> ketaaak-----FERQHMDSSSTAAsSSNYCNQMMKSRNLTKDRCKPVNTFVHESLADVOAVCSQKNVackngqTNCYQSYSTMSITDRETSSSKYPNCAYKTTQANKHIIVACEGNPYVPVHFDASV----<br/> -----qdnsrythLTOHYDAKPOGRDD-RYCESIMRRRGLTSP-CKDINTFIHGKRSIKAIICENkGNP--NPHRENLRISKSSFOVITKLGHGSPWPCQYRATAGFRNVVACENGL--LPVHLDQSi frrp</p> <p><b>Proposed:</b> aliSize=115 (resi) RMSD=1.74 (Å)<br/> KE--TAAAKFERQHMDSSST-saASSNYCNQMMKSRNLTKDRCKPVNTFVHESLADVOAVCS---QKNVackngqTNCYQSYSTMSITDRETSSSKYPNCAYKTTQANKHIIVACEGNPYVPVHFD--ASV<br/> -QDnSRYTHLTOHYDAKp--GRDDRYCESIMRRRGLTS-PCKDINTFIHGKRSIKAIICENkGNPHR-----ENLRISKSSFOVITKLGHGSPWPCQYRATAGFRNVVACENGLPVHLDQSi fRRP</p> |
| 295 | <p>1js0A<br/>(124)</p> <hr/> <p>1b6vA<br/>(124)</p> | C | 94.35 | <p><b>TM-align:</b> aliSize=115 (resi) RMSD=1.39 (Å)<br/> KETAAAKFERQHMDSSSTAAsSSNYCNQMMKSRNLTKDRCKPVNTFVHESLADVOAVCSQKNVackngqTNCYQSYSTMSITDRETGSSKYPNCAYKTTQANKHIIVACEGNPYvpvhfdasv-----<br/> KETAAAKFERQHMDSSSTAAsSSNYCNQMMKSRNLTKDRCKPVNTFVHESLADVKAVCSQKNVackngqTNCYQSYSTMSITDRETGSSKYPNCAYKTTQANKHIIVACEGKPY-----vpvhfdasv</p> <p><b>SARST:</b> aliSize=122 (resi) RMSD=6.20 (Å)<br/> k-ETAAAKFERQHMDSSSTAAsSSNYCNQMMKSRNLTKDRCKPVNTFVHESLADVOAVCSQKNVackngqTNCYQSYSTMSITDRETGSSKYPNCAYKTTQANKHIIVACEGNPYVPVHFDAS-v<br/> -kETAAAKFERQHMDSSSTAAsSSNYCNQMMKSRNLTKDRCKPVNTFVHESLADVKAVCSQKNVackngqTNCYQSYSTMSITDRETGSSKYPNCAYKTTQANKHIIVACEGKPYVPVHFDASv-</p> <p><b>BLAST:</b> aliSize=118 (resi) iden=94.35% (117/124) simi=95.16% (118/124)<br/> KETAAAKFERQHMDSSSTAAsSSNYCNQMMKSRNLTKDRCKPVNTFVHESLADVOAVCSQKNVackngqTNCYQSYSTMSITDRETGSSKYPNCAYKTTQANKHIIVACEGNPYVPVHFDASV<br/> KETAAAKFERQHMDSSSTAAsSSNYCNQMMKSRNLTKDRCKPVNTFVHESLADVKAVCSQKNVackngqTNCYQSYSTMSITDRETGSSKYPNCAYKTTQANKHIIVACEGKPYVPVHFDASV</p> <p><b>Proposed:</b> aliSize=124 (resi) RMSD=0.68 (Å)<br/> KETAAAKFERQHMDSSSTAAsSSNYCNQMMKSRNLTKDRCKPVNTFVHESLADVOAVCSQKNVackngqTNCYQSYSTMSITDRETGSSKYPNCAYKTTQANKHIIVACEGNPYVPVHFDASV<br/> KETAAAKFERQHMDSSSTAAsSSNYCNQMMKSRNLTKDRCKPVNTFVHESLADVKAVCSQKNVackngqTNCYQSYSTMSITDRETGSSKYPNCAYKTTQANKHIIVACEGKPYVPVHFDASV</p>                                              |
| 296 | <p>1js0A<br/>(124)</p> <hr/> <p>1c8wA<br/>(124)</p> | C | 99.19 | <p><b>TM-align:</b> aliSize=115 (resi) RMSD=1.44 (Å)<br/> KETAAAKFERQHMDSSSTAAsSSNYCNQMMKSRNLTKDRCKPVNTFVHESLADVOAVCSQKNVackngqTNCYQSYSTMSITDRETGSSKYPNCAYKTTQANKHIIVACEGNPYvpvhfdasv-----<br/> KETAAAKFERQHMDSSSTAAsSSNYCNQMMKSRNLTKDRCKPVNTFVHESLADVOAVCSQKNVackngqTNCYQSYSTMSITDRETGSSKYPNCAYKTTQANKHIIVACEGNPY-----vpvhfdasv</p> <p><b>SARST:</b> aliSize=122 (resi) RMSD=6.20 (Å)<br/> k-ETAAAKFERQHMDSSSTAAsSSNYCNQMMKSRNLTKDRCKPVNTFVHESLADVOAVCSQKNVackngqTNCYQSYSTMSITDRETGSSKYPNCAYKTTQANKHIIVACEGNPYVPVHFDAS-v<br/> -kETAAAKFERQHMDSSSTAAsSSNYCNQMMKSRNLTKDRCKPVNTFVHESLADVOAVCSQKNVackngqTNCYQSYSTMSITDRETGSSKYPNCAYKTTQANKHIIVACEGNPYVPVHFDASv-</p> <p><b>BLAST:</b> aliSize=123 (resi) iden=99.19% (123/124) simi=99.19% (123/124)<br/> KETAAAKFERQHMDSSSTAAsSSNYCNQMMKSRNLTKDRCKPVNTFVHESLADVOAVCSQKNVackngqTNCYQSYSTMSITDRETGSSKYPNCAYKTTQANKHIIVACEGNPYVPVHFDASV<br/> KETAAAKFERQHMDSSSTAAsSSNYCNQMMKSRNLTKDRCKPVNTFVHESLADVOAVCSQKNVackngqTNCYQSYSTMSITDRETGSSKYPNCAYKTTQANKHIIVACEGNPYVPVHFDASV</p> <p><b>Proposed:</b> aliSize=124 (resi) RMSD=0.76 (Å)<br/> KETAAAKFERQHMDSSSTAAsSSNYCNQMMKSRNLTKDRCKPVNTFVHESLADVOAVCSQKNVackngqTNCYQSYSTMSITDRETGSSKYPNCAYKTTQANKHIIVACEGNPYVPVHFDASV<br/> KETAAAKFERQHMDSSSTAAsSSNYCNQMMKSRNLTKDRCKPVNTFVHESLADVOAVCSQKNVackngqTNCYQSYSTMSITDRETGSSKYPNCAYKTTQANKHIIVACEGNPYVPVHFDASV</p>                                              |

|     |                |   |       |                                                                                                                                                                                                                                                                                                                                                                                                                                                                                                                                                                                               |
|-----|----------------|---|-------|-----------------------------------------------------------------------------------------------------------------------------------------------------------------------------------------------------------------------------------------------------------------------------------------------------------------------------------------------------------------------------------------------------------------------------------------------------------------------------------------------------------------------------------------------------------------------------------------------|
| 297 | 1js0A<br>(124) | C | 99.19 | <b>TM-align:</b> aliSize=115 (resi) RMSD=1.38 (Å)<br>KETA <del>AAKFER</del> QH <del>MDSS</del> STAASS <del>SN</del> CN <del>QMMK</del> SRNLTKDR <del>CKPV</del> NTFVHESLADVQAVCSQKNVACKNGOTNCYQSYSTMSITDCRE <del>TGSSKYP</del> NCA <del>YKTTQ</del> ANKHIIVACE <del>GNPY</del> vpvhf <del>dasv</del> -----<br>KETA <del>AAKFER</del> QH <del>MDSS</del> STAASS <del>SN</del> CN <del>QMMK</del> SRNLTKDR <del>CKPV</del> NTFVHESLADVQAVCSQKNVACKNGOTNCYQSYSTMSITDCRE <del>TGSSKYP</del> NCA <del>YKTTQ</del> ANKHIIVACE <del>GNPY</del> -----vpvhf <del>dasv</del>                            |
|     | 1c9vA<br>(124) |   |       | <b>SARST:</b> aliSize=122 (resi) RMSD=6.24 (Å)<br>k- <del>E</del> TAAAKFERQH <del>MDSS</del> STAASS <del>SN</del> CN <del>QMMK</del> SRNLTKDR <del>CKPV</del> NTFVHESLADVQAVCSQKNVACKNGOTNCYQSYSTMSITDCRE <del>TGSSKYP</del> NCA <del>YKTTQ</del> ANKHIIVACE <del>GNPY</del> VVPVHFDAS <del>-v</del><br>-k <del>E</del> TAAAKFERQH <del>MDSS</del> STAASS <del>SN</del> CN <del>QMMK</del> SRNLTKDR <del>CKPV</del> NTFVHESLADVQAVCSQKNVACKNGOTNCYQSYSTMSITDCRE <del>TGSSKYP</del> NCA <del>YKTTQ</del> ANKHIIVACE <del>GNPY</del> VVPVHFDAS <del>v-</del>                                    |
|     |                |   |       | <b>BLAST:</b> aliSize=123 (resi) iden=99.19% (123/124) simi=99.19% (123/124)<br>KETA <del>AAKFER</del> QH <del>MDSS</del> STAASS <del>SN</del> CN <del>QMMK</del> SRNLTKDR <del>CKPV</del> NTFVHESLADVQAVCSQKNVACKNGOTNCYQSYSTMSITDCRE <del>TGSSKYP</del> NCA <del>YKTTQ</del> ANKHIIVACE <del>GNPY</del> VVPVHFDASV<br>KETA <del>AAKFER</del> QH <del>MDSS</del> STAASS <del>SN</del> CN <del>QMMK</del> SRNLTKDR <del>CKPV</del> NTFVHESLADVQAVCSQKNVACKNGOTNCYQSYSTMSITDCRE <del>TGSSKYP</del> NCA <del>YKTTQ</del> ANKHIIVACE <del>GNPY</del> VVPVHFDASV                                  |
|     |                |   |       | <b>Proposed:</b> aliSize=124 (resi) RMSD=0.66 (Å)<br>KETA <del>AAKFER</del> QH <del>MDSS</del> STAASS <del>SN</del> CN <del>QMMK</del> SRNLTKDR <del>CKPV</del> NTFVHESLADVQAVCSQKNVACKNGOTNCYQSYSTMSITDCRE <del>TGSSKYP</del> NCA <del>YKTTQ</del> ANKHIIVACE <del>GNPY</del> VVPVHFDASV<br>KETA <del>AAKFER</del> QH <del>MDSS</del> STAASS <del>SN</del> CN <del>QMMK</del> SRNLTKDR <del>CKPV</del> NTFVHESLADVQAVCSQKNVACKNGOTNCYQSYSTMSITDCRE <del>TGSSKYP</del> NCA <del>YKTTQ</del> ANKHIIVACE <del>GNPY</del> VVPVHFDASV                                                             |
| 298 | 1js0A<br>(124) | C | 99.19 | <b>TM-align:</b> aliSize=115 (resi) RMSD=1.36 (Å)<br>KETA <del>AAKFER</del> QH <del>MDSS</del> STAASS <del>SN</del> CN <del>QMMK</del> SRNLTKDR <del>CKPV</del> NTFVHESLADVQAVCSQKNVACKNGOTNCYQSYSTMSITDCRE <del>TGSSKYP</del> NCA <del>YKTTQ</del> ANKHIIVACE <del>GNPY</del> vpvhf <del>dasv</del> -----<br>KETA <del>AAKFER</del> QH <del>MDSS</del> STAASS <del>SN</del> CN <del>QMMK</del> SRNLTKDR <del>CKPV</del> NTFVHESLADVQAVCSQKNVACKNGOTNCYQSYSTMSITDCRE <del>TGSSKYP</del> NCA <del>YKTTQ</del> ANKHIIVACE <del>GNPY</del> -----vpvaf <del>dasv</del>                            |
|     | 1c9xA<br>(124) |   |       | <b>SARST:</b> aliSize=122 (resi) RMSD=6.24 (Å)<br>k- <del>E</del> TAAAKFERQH <del>MDSS</del> STAASS <del>SN</del> CN <del>QMMK</del> SRNLTKDR <del>CKPV</del> NTFVHESLADVQAVCSQKNVACKNGOTNCYQSYSTMSITDCRE <del>TGSSKYP</del> NCA <del>YKTTQ</del> ANKHIIVACE <del>GNPY</del> VVPVHFDAS <del>-v</del><br>-k <del>E</del> TAAAKFERQH <del>MDSS</del> STAASS <del>SN</del> CN <del>QMMK</del> SRNLTKDR <del>CKPV</del> NTFVHESLADVQAVCSQKNVACKNGOTNCYQSYSTMSITDCRE <del>TGSSKYP</del> NCA <del>YKTTQ</del> ANKHIIVACE <del>GNPY</del> VVPVAFDAS <del>v-</del>                                    |
|     |                |   |       | <b>BLAST:</b> aliSize=123 (resi) iden=99.19% (123/124) simi=99.19% (123/124)<br>KETA <del>AAKFER</del> QH <del>MDSS</del> STAASS <del>SN</del> CN <del>QMMK</del> SRNLTKDR <del>CKPV</del> NTFVHESLADVQAVCSQKNVACKNGOTNCYQSYSTMSITDCRE <del>TGSSKYP</del> NCA <del>YKTTQ</del> ANKHIIVACE <del>GNPY</del> VVPVHFDASV<br>KETA <del>AAKFER</del> QH <del>MDSS</del> STAASS <del>SN</del> CN <del>QMMK</del> SRNLTKDR <del>CKPV</del> NTFVHESLADVQAVCSQKNVACKNGOTNCYQSYSTMSITDCRE <del>TGSSKYP</del> NCA <del>YKTTQ</del> ANKHIIVACE <del>GNPY</del> VVPVAFDASV                                  |
|     |                |   |       | <b>Proposed:</b> aliSize=124 (resi) RMSD=0.58 (Å)<br>KETA <del>AAKFER</del> QH <del>MDSS</del> STAASS <del>SN</del> CN <del>QMMK</del> SRNLTKDR <del>CKPV</del> NTFVHESLADVQAVCSQKNVACKNGOTNCYQSYSTMSITDCRE <del>TGSSKYP</del> NCA <del>YKTTQ</del> ANKHIIVACE <del>GNPY</del> VVPVHFDASV<br>KETA <del>AAKFER</del> QH <del>MDSS</del> STAASS <del>SN</del> CN <del>QMMK</del> SRNLTKDR <del>CKPV</del> NTFVHESLADVQAVCSQKNVACKNGOTNCYQSYSTMSITDCRE <del>TGSSKYP</del> NCA <del>YKTTQ</del> ANKHIIVACE <del>GNPY</del> VVPVAFDASV                                                             |
| 299 | 1js0A<br>(124) | C | 68.91 | <b>TM-align:</b> aliSize=107 (resi) RMSD=1.60 (Å)<br>keta <del>aaK</del> FERQH <del>MDSS</del> STAASS <del>SN</del> CN <del>QMMK</del> SRNLTKDR <del>CKPV</del> NTFVHESLADVQAVCSQKNVACKNGOTNCYQSYSTMSITDCRE <del>TGSSKYP</del> NCA <del>YKTTQ</del> ANKHIIVACE <del>GNPY</del> vpvhf <del>dasv</del> -----<br>-----AF <del>ROH</del> MDSDS-SPSS <del>S</del> TYCN <del>QMMRR</del> RM <del>TOGR</del> CKPVNTFVHESLADVQAVCSQKNVACKNGOTNCYQSYSTMSITDCRE <del>TGSSKYP</del> NCA <del>YKTTQ</del> ANKHIIVACE <del>GSP</del> -----yvvhf <del>dasve</del>                                           |
|     | 1e21A<br>(119) |   |       | <b>SARST:</b> aliSize=116 (resi) RMSD=6.54 (Å)<br>keta <del>aaK</del> - <del>F</del> ROH <del>MDSS</del> STAASS <del>SN</del> CN <del>QMMK</del> SRNLTKDR <del>CKPV</del> NTFVHESLADVQAVCSQKNVACKNGOTNCYQSYSTMSITDCRE <del>TGSSKYP</del> NCA <del>YKTTQ</del> ANKHIIVACE <del>GNPY</del> VVPVHFDAS <del>-v</del><br>-----a <del>F</del> ROH <del>MDSDS</del> SPSS <del>S</del> TYCN <del>QMMRR</del> RM <del>TOGR</del> CKPVNTFVHESLADVQAVCSQKNVACKNGOTNCYQSYSTMSITDCRE <del>TGSSKYP</del> NCA <del>YKTTQ</del> ANKHIIVACE <del>GSP</del> VVPVHFDAS <del>ve-</del>                            |
|     |                |   |       | <b>BLAST:</b> aliSize=97 (resi) iden=69.75% (83/119) simi=81.51% (97/119)<br>keta <del>aaK</del> - <del>F</del> ROH <del>MDSS</del> STAASS <del>SN</del> CN <del>QMMK</del> SRNLTKDR <del>CKPV</del> NTFVHESLADVQAVCSQKNVACKNGOTNCYQSYSTMSITDCRE <del>TGSSKYP</del> NCA <del>YKTTQ</del> ANKHIIVACE <del>GNPY</del> VVPVHFDASV <del>-e</del><br>-----a <del>F</del> ROH <del>MDSDS</del> SPSS <del>S</del> TYCN <del>QMMRR</del> RM <del>TOGR</del> CKPVNTFVHESLADVQAVCSQKNVACKNGOTNCYQSYSTMSITDCRE <del>TGSSKYP</del> NCA <del>YKTTQ</del> ANKHIIVACE <del>GSP</del> VVPVHFDASV <del>e</del> |
|     |                |   |       | <b>Proposed:</b> aliSize=117 (resi) RMSD=1.29 (Å)<br>keta <del>aaK</del> FERQH <del>MDSS</del> STAASS <del>SN</del> CN <del>QMMK</del> SRNLTKDR <del>CKPV</del> NTFVHESLADVQAVCSQKNVACKNGOTNCYQSYSTMSITDCRE <del>TGSSKYP</del> NCA <del>YKTTQ</del> ANKHIIVACE <del>GNPY</del> VVPVHFDASV <del>-e</del><br>-----AF <del>ROH</del> MDSDS-SPSS <del>S</del> TYCN <del>QMMRR</del> RM <del>TOGR</del> CKPVNTFVHESLADVQAVCSQKNVACKNGOTNCYQSYSTMSITDCRE <del>TGSSKYP</del> NCA <del>YKTTQ</del> ANKHIIVACE <del>GSP</del> VVPVHFDASV <del>e</del>                                                  |

|     |             |   |       |                                                                                                                                                                                                                                                                                                                                                                                                                                                                                                                                                                                                                                                                                                                                                                                                                                                                                                                                                                                                                                                                                                                                                                                                                                                                                                                                                                                                                                                                                                                                                                                                                                                                                                                                                                                                                                                                                                                                                                                                                                                                                                                                                                                                                                                                                                                                                                                                  |
|-----|-------------|---|-------|--------------------------------------------------------------------------------------------------------------------------------------------------------------------------------------------------------------------------------------------------------------------------------------------------------------------------------------------------------------------------------------------------------------------------------------------------------------------------------------------------------------------------------------------------------------------------------------------------------------------------------------------------------------------------------------------------------------------------------------------------------------------------------------------------------------------------------------------------------------------------------------------------------------------------------------------------------------------------------------------------------------------------------------------------------------------------------------------------------------------------------------------------------------------------------------------------------------------------------------------------------------------------------------------------------------------------------------------------------------------------------------------------------------------------------------------------------------------------------------------------------------------------------------------------------------------------------------------------------------------------------------------------------------------------------------------------------------------------------------------------------------------------------------------------------------------------------------------------------------------------------------------------------------------------------------------------------------------------------------------------------------------------------------------------------------------------------------------------------------------------------------------------------------------------------------------------------------------------------------------------------------------------------------------------------------------------------------------------------------------------------------------------|
| 300 | 1js0A (124) | C | 99.19 | <p><b>TM-align:</b> aliSize=115 (resi) RMSD=1.45 (Å)<br/> KETA AA AK FER OH M DS S T S A A S S S N Y C N Q M M K S R N L T K D R C K P V N T F V H E S L A D V Q A V C S O K N V A C K N G O T N C Y Q S Y S T M S I T D C R E T G S S K Y P N C A Y K T T Q A N K H I I V A C E G N P Y v p v h f d a s v -----<br/> KETA AA AK FER OH M DS S T S A A S S S N Y C N Q M M K S R N L T K D R C K P V N T F V H E S L A D V Q A V C S O K N V A C K N G O T N C Y Q S Y S T M S I T D C R E T G S S K Y P N C A Y K T T Q A N K H I I V A C E G N P Y ----- v p v h g d a s v</p> <p><b>SARST:</b> aliSize=119 (resi) RMSD=4.31 (Å)<br/> k- E T A A A K F E R O H M D S S T S A A S S S N Y C N Q M M K S R N L T K D R C K P V N T F V H E S L A D V Q A V C S O K N V A C K N G O T N C Y Q S Y S T M S I T D C R E T G S S K Y P N C A Y K T T Q A N K H I I V A C E G N P Y V P V H F ----- d a s v<br/> -k E T A A A K F E R O H M D S S T S A A S S S N Y C N Q M M K S R N L T K D R C K P V N T F V H E S L A D V Q A V C S O K N V A C K N G O T N C Y Q S Y S T M S I T D C R E T G S S K Y P N C A Y K T T Q A N K H I I V A C E G N P Y V P V H F ----- d a s v -----</p> <p><b>BLAST:</b> aliSize=123 (resi) iden=99.19% (123/124) simi=99.19% (123/124)<br/> KETA AA AK FER OH M DS S T S A A S S S N Y C N Q M M K S R N L T K D R C K P V N T F V H E S L A D V Q A V C S O K N V A C K N G O T N C Y Q S Y S T M S I T D C R E T G S S K Y P N C A Y K T T Q A N K H I I V A C E G N P Y V P V H F ----- d a s v<br/> KETA AA AK FER OH M DS S T S A A S S S N Y C N Q M M K S R N L T K D R C K P V N T F V H E S L A D V Q A V C S O K N V A C K N G O T N C Y Q S Y S T M S I T D C R E T G S S K Y P N C A Y K T T Q A N K H I I V A C E G N P Y V P V H F ----- d a s v -----</p> <p><b>Proposed:</b> aliSize=124 (resi) RMSD=0.76 (Å)<br/> KETA AA AK FER OH M DS S T S A A S S S N Y C N Q M M K S R N L T K D R C K P V N T F V H E S L A D V Q A V C S O K N V A C K N G O T N C Y Q S Y S T M S I T D C R E T G S S K Y P N C A Y K T T Q A N K H I I V A C E G N P Y V P V H F ----- d a s v<br/> KETA AA AK FER OH M DS S T S A A S S S N Y C N Q M M K S R N L T K D R C K P V N T F V H E S L A D V Q A V C S O K N V A C K N G O T N C Y Q S Y S T M S I T D C R E T G S S K Y P N C A Y K T T Q A N K H I I V A C E G N P Y V P V H F ----- d a s v -----</p>    |
| 301 | 1js0A (124) | C | 99.19 | <p><b>TM-align:</b> aliSize=114 (resi) RMSD=1.16 (Å)<br/> KETA AA AK FER OH M DS S T S A A S S S N Y C N Q M M K S R N L T K D R C K P V N T F V H E S L A D V Q A V C S O K N V A C K N G O T N C Y Q S Y S T M S I T D C R E T G S S K Y P N C A Y K T T Q A N K H I I V A C E G N P Y v p v h f d a s v -----<br/> KETA AA AK FER OH M DS S T S A A S S S N Y C N Q M M K S R N L T K D R C K P V N T F V H E S L A D V Q A V C S O K N V A C K N G O T N C Y Q S Y S T M S I T D C R E T G S S K Y P N C A Y K T T Q A N K H I I V A C E G N P Y ----- y p v h w d a s v</p> <p><b>SARST:</b> aliSize=122 (resi) RMSD=6.21 (Å)<br/> k- E T A A A K F E R O H M D S S T S A A S S S N Y C N Q M M K S R N L T K D R C K P V N T F V H E S L A D V Q A V C S O K N V A C K N G O T N C Y Q S Y S T M S I T D C R E T G S S K Y P N C A Y K T T Q A N K H I I V A C E G N P Y V P V H F ----- d a s v - v<br/> -k E T A A A K F E R O H M D S S T S A A S S S N Y C N Q M M K S R N L T K D R C K P V N T F V H E S L A D V Q A V C S O K N V A C K N G O T N C Y Q S Y S T M S I T D C R E T G S S K Y P N C A Y K T T Q A N K H I I V A C E G N P Y V P V H F ----- d a s v - -</p> <p><b>BLAST:</b> aliSize=124 (resi) iden=99.19% (123/124) simi=100.00% (124/124)<br/> KETA AA AK FER OH M DS S T S A A S S S N Y C N Q M M K S R N L T K D R C K P V N T F V H E S L A D V Q A V C S O K N V A C K N G O T N C Y Q S Y S T M S I T D C R E T G S S K Y P N C A Y K T T Q A N K H I I V A C E G N P Y V P V H F ----- d a s v<br/> KETA AA AK FER OH M DS S T S A A S S S N Y C N Q M M K S R N L T K D R C K P V N T F V H E S L A D V Q A V C S O K N V A C K N G O T N C Y Q S Y S T M S I T D C R E T G S S K Y P N C A Y K T T Q A N K H I I V A C E G N P Y V P V H F ----- d a s v -----</p> <p><b>Proposed:</b> aliSize=124 (resi) RMSD=0.73 (Å)<br/> KETA AA AK FER OH M DS S T S A A S S S N Y C N Q M M K S R N L T K D R C K P V N T F V H E S L A D V Q A V C S O K N V A C K N G O T N C Y Q S Y S T M S I T D C R E T G S S K Y P N C A Y K T T Q A N K H I I V A C E G N P Y V P V H F ----- d a s v<br/> KETA AA AK FER OH M DS S T S A A S S S N Y C N Q M M K S R N L T K D R C K P V N T F V H E S L A D V Q A V C S O K N V A C K N G O T N C Y Q S Y S T M S I T D C R E T G S S K Y P N C A Y K T T Q A N K H I I V A C E G N P Y V P V H F ----- d a s v -----</p> |
| 302 | 1js0A (124) | C | 32.26 | <p><b>TM-align:</b> aliSize=103 (resi) RMSD=2.39 (Å)<br/> ke----TAAAK FER OH M DS S T S A A S S S N Y C N Q M M K S R N L T K D R C K P V N T F V H E S L A D V Q A V C S ---QKNVackngqTNCYQSYSTMSITDCRETGSSKYPNCAKTTQANKHIIVACEGNPyvpvhfdasv-----<br/> --aqddyRYIHfLTQHYDA-K-PKGRNdEYCFNMKNRRLT-RPCKDRNTHfHGKNKIKAI CEDRNGOPYR----GDLRI SKSEFOITIKHKGSS-RPpCRIGATEDSRVIVGCEngL-----pvhfdesfi tprh</p> <p><b>SARST:</b> aliSize=93 (resi) RMSD=5.77 (Å)<br/> ketaaakferqhmdsstsaass-----SNYCNQMMKSRNLTkDRCKPVNTFVHESLADVOAVCSOKNVACKNGqTNCYQSYSTMSITDCRETGSSKYPNCAKTTQANKHIIVACEGNPyVPVH-----dasv<br/> -----aqddyryihfLqhydakpgrndEYCFNMKNRRLT-RPCKDRNTHfHGKNKIKAI CEDRNGOPYR--DLRISKSEFOITIKHKGSS-RPpCRIGATEDSRVIVGCEngL-----desfi tprh----</p> <p><b>BLAST:</b> aliSize=60 (resi) iden=35.48% (44/124) simi=48.39% (60/124)<br/> ketaaak-----FEROHMDSSTSAASSSNYCNQMMKSRNLTkDRCKPVNTFVHESLADVOAVCSOKNVACKNGQTNcyqSYSTMSITDCRETGSSKYPNCAKTTQANKHIIVACEGNpyVPVHFDA-----v<br/> -----aqddyryihfLTQHYDAKPKGRNDE-YCFNMKNRRLTRP-CKDRNTHfHGKNKIKAI CEDRNGOPYRDLRI--SKSEFOITIKHKGSS-RPpCRIGATEDSRVIVGCEngL-----LPVHFDdesfi tprh-</p> <p><b>Proposed:</b> aliSize=110 (resi) RMSD=1.92 (Å)<br/> ke----TAAAK FER OH M DS S T S A A S S S N Y C N Q M M K S R N L T K D R C K P V N T F V H E S L A D V Q A V C S ---QKNVackngqTNCYQSYSTMSITDCRETGSSKYPNCAKTTQANKHIIVACEGNpyVPVHFDA-SV----<br/> --aqddyR-YIHfLTQHYDA-K-PKGRNdEYCFNMKNRRLT-RPCKDRNTHfHGKNKIKAI CEDRNGOPYR----GDLRISKSEFOITIKHKGSS-RPpCRIGATEDSRVIVGCEngL-----LPVHFDdesfi tprh</p>                                                                                                                                                                                                                                                                                                                                                                                                                                                                                                                                                                                                                                                                                                                                                                                                                                                            |
|     | 1gioA (125) |   |       |                                                                                                                                                                                                                                                                                                                                                                                                                                                                                                                                                                                                                                                                                                                                                                                                                                                                                                                                                                                                                                                                                                                                                                                                                                                                                                                                                                                                                                                                                                                                                                                                                                                                                                                                                                                                                                                                                                                                                                                                                                                                                                                                                                                                                                                                                                                                                                                                  |

|     |                                       |   |       |                                                                                                                                                                                                                                                                                                                                                                                                                                                                                                                                                                                                                                                                                                                                                                                                                                                                                                                                                                                                                                                                                                                                                                                                                                                                                                                                                                                         |
|-----|---------------------------------------|---|-------|-----------------------------------------------------------------------------------------------------------------------------------------------------------------------------------------------------------------------------------------------------------------------------------------------------------------------------------------------------------------------------------------------------------------------------------------------------------------------------------------------------------------------------------------------------------------------------------------------------------------------------------------------------------------------------------------------------------------------------------------------------------------------------------------------------------------------------------------------------------------------------------------------------------------------------------------------------------------------------------------------------------------------------------------------------------------------------------------------------------------------------------------------------------------------------------------------------------------------------------------------------------------------------------------------------------------------------------------------------------------------------------------|
| 303 | <p>1js0A (124)</p> <p>1gv7A (123)</p> | C | 41.46 | <p><b>TM-align:</b> aliSize=112 (resi) RMSD=2.19 (Å)<br/> KETA AAKFERQHMDSSSTAAsSSNYCNQMMKSRNLTKDRCKPVNTFVHESLADVOAVCSQKNVACKNGOTNCYQSYSTMSITDCRETGSSKYPNCA YKTTQANKHIIVACEG NPyvpvhfdasv-----<br/> DNSRYTHLTOHYIAKPOGR-DDRYCESIMRRRGLT-SPCKDINTFIHGKRSIKAI CSQKNVACKNGOTNCYI SKSFOVITKLGSGPWPPQYRATAGFRNVVACENGL-----pvhldqsifr</p> <p><b>SARST:</b> aliSize=113 (resi) RMSD=4.69 (Å)<br/> ket---AAAKFERQHMDSSSTAAsSSNYCNQMMKSRNLTKDRCKPVNTFVHESLADVOAVCSQKNVACKNGOTNCYQSYSTMSITDCRETGSSKYPNCA YKTTQANKHIIVACEg NPYVPVHF-----dasv<br/> ---dnsRYTHLTOHYIAKPOGR-DDRYCESIMRRRGLT-SPCKDINTFIHGKRSIKAI CSQKNVACKNGOTNCYI SKSFOVITKLGSGPWPPQYRATAGFRNVVAC--ENGLPVHLDqsifr---</p> <p><b>BLAST:</b> aliSize=72 (resi) iden=42.62% (52/123) simi=59.02% (72/123)<br/> ketaaak-----FERQHMDSSSTAAsSSNYCNQMMKSRNLTKDRCKPVNTFVHESLADVOAVCSQKNVACKNGOTNCYQSYSTMSITDCRETGSSKYPNCA YKTTQANKHIIVACEG NpyVPVHFDA SV--<br/> -----dnsrythLTOHYIAKPOGRDD-RYCESIMRRRGLT-SPCKDINTFIHGKRSIKAI CSQKNVACKNGOTNCYI SKSFOVITKLGSGPWPPQYRATAGFRNVVACENG--LPVHLDQsIFr</p> <p><b>Proposed:</b> aliSize=117 (resi) RMSD=1.41 (Å)<br/> ke---TAAAKFERQHMDSST-saAsSSNYCNQMMKSRNLTKDRCKPVNTFVHESLADVOAVCSQKNVACKNGOTNCYQSYSTMSITDCRETGSSKYPNCA YKTTQANKHIIVACEG NpyVPVHFDA-SV-<br/> --pdnRYTHLTOHYIAKPOq--GRDDRYCESIMRRRGLT-SPCKDINTFIHGKRSIKAI CSQKNVACKNGOTNCYI SKSFOVITKLGSGPWPPQYRATAGFRNVVACEN--GLPVHLDQsIFr</p>      |
| 304 | <p>1js0A (124)</p> <p>lizpA (124)</p> | C | 99.19 | <p><b>TM-align:</b> aliSize=114 (resi) RMSD=1.06 (Å)<br/> KETA AAKFERQHMDSSSTAAsSSNYCNQMMKSRNLTKDRCKPVNTFVHESLADVOAVCSQKNVACKNGOTNCYQSYSTMSITDCRETGSSKYPNCA YKTTQANKHIIVACEG Nfyvpvhfdasv-----<br/> KETA AAKFERQHMDSSSTAAsSSNYCNQMMKSRNLTKDRCKPVNTLVHESLADVOAVCSQKNVACKNGOTNCYQSYSTMSITDCRETGSSKYPNCA YKTTQANKHIIVACEG N-----yvpvhfdasv</p> <p><b>SARST:</b> aliSize=122 (resi) RMSD=6.24 (Å)<br/> k-E TAAAKFERQHMDSSSTAAsSSNYCNQMMKSRNLTKDRCKPVNTFVHESLADVOAVCSQKNVACKNGOTNCYQSYSTMSITDCRETGSSKYPNCA YKTTQANKHIIVACEG NPYVPVHFDA S-v<br/> -kETA AAKFERQHMDSSSTAAsSSNYCNQMMKSRNLTKDRCKPVNTLVHESLADVOAVCSQKNVACKNGOTNCYQSYSTMSITDCRETGSSKYPNCA YKTTQANKHIIVACEG NPYVPVHFDA S-v-</p> <p><b>BLAST:</b> aliSize=123 (resi) iden=99.19% (123/124) simi=99.19% (123/124)<br/> KETA AAKFERQHMDSSSTAAsSSNYCNQMMKSRNLTKDRCKPVNTFVHESLADVOAVCSQKNVACKNGOTNCYQSYSTMSITDCRETGSSKYPNCA YKTTQANKHIIVACEG NPYVPVHFDA SV<br/> KETA AAKFERQHMDSSSTAAsSSNYCNQMMKSRNLTKDRCKPVNTLVHESLADVOAVCSQKNVACKNGOTNCYQSYSTMSITDCRETGSSKYPNCA YKTTQANKHIIVACEG NPYVPVHFDA SV</p> <p><b>Proposed:</b> aliSize=124 (resi) RMSD=0.61 (Å)<br/> KETA AAKFERQHMDSSSTAAsSSNYCNQMMKSRNLTKDRCKPVNTFVHESLADVOAVCSQKNVACKNGOTNCYQSYSTMSITDCRETGSSKYPNCA YKTTQANKHIIVACEG NPYVPVHFDA SV<br/> KETA AAKFERQHMDSSSTAAsSSNYCNQMMKSRNLTKDRCKPVNTLVHESLADVOAVCSQKNVACKNGOTNCYQSYSTMSITDCRETGSSKYPNCA YKTTQANKHIIVACEG NPYVPVHFDA SV</p> |
| 305 | <p>1js0A (124)</p> <p>lizqA (124)</p> | C | 99.19 | <p><b>TM-align:</b> aliSize=114 (resi) RMSD=1.10 (Å)<br/> KETA AAKFERQHMDSSSTAAsSSNYCNQMMKSRNLTKDRCKPVNTFVHESLADVOAVCSQKNVACKNGOTNCYQSYSTMSITDCRETGSSKYPNCA YKTTQANKHIIVACEG Nfyvpvhfdasv-----<br/> KETA AAKFERQHMDSSSTAAsSSNYCNQMMKSRNLTKDRCKPVNTLVHESLADVOAVCSQKNVACKNGOTNCYQSYSTMSITDCRETGSSKYPNCA YKTTQANKHIIVACEG N-----yvpvhfdasv</p> <p><b>SARST:</b> aliSize=122 (resi) RMSD=6.24 (Å)<br/> k-E TAAAKFERQHMDSSSTAAsSSNYCNQMMKSRNLTKDRCKPVNTFVHESLADVOAVCSQKNVACKNGOTNCYQSYSTMSITDCRETGSSKYPNCA YKTTQANKHIIVACEG NPYVPVHFDA S-v<br/> -kETA AAKFERQHMDSSSTAAsSSNYCNQMMKSRNLTKDRCKPVNTLVHESLADVOAVCSQKNVACKNGOTNCYQSYSTMSITDCRETGSSKYPNCA YKTTQANKHIIVACEG NPYVPVHFDA S-v-</p> <p><b>BLAST:</b> aliSize=123 (resi) iden=99.19% (123/124) simi=99.19% (123/124)<br/> KETA AAKFERQHMDSSSTAAsSSNYCNQMMKSRNLTKDRCKPVNTFVHESLADVOAVCSQKNVACKNGOTNCYQSYSTMSITDCRETGSSKYPNCA YKTTQANKHIIVACEG NPYVPVHFDA SV<br/> KETA AAKFERQHMDSSSTAAsSSNYCNQMMKSRNLTKDRCKPVNTLVHESLADVOAVCSQKNVACKNGOTNCYQSYSTMSITDCRETGSSKYPNCA YKTTQANKHIIVACEG NPYVPVHFDA SV</p> <p><b>Proposed:</b> aliSize=124 (resi) RMSD=0.66 (Å)<br/> KETA AAKFERQHMDSSSTAAsSSNYCNQMMKSRNLTKDRCKPVNTFVHESLADVOAVCSQKNVACKNGOTNCYQSYSTMSITDCRETGSSKYPNCA YKTTQANKHIIVACEG NPYVPVHFDA SV<br/> KETA AAKFERQHMDSSSTAAsSSNYCNQMMKSRNLTKDRCKPVNTLVHESLADVOAVCSQKNVACKNGOTNCYQSYSTMSITDCRETGSSKYPNCA YKTTQANKHIIVACEG NPYVPVHFDA SV</p> |

|     |                                                     |   |        |                                                                                                                                                                                                                                                                                                                                                                                                                                                                                                                                                                                                                                                                                                                                                                                                                                                                                                                                                                                                                                                                                                                                                                                                                                                                                                                                                                                                                                                                                                                                                                                                                                                                                                                                                                                                                                                                                                                                                                                                                                                                                   |
|-----|-----------------------------------------------------|---|--------|-----------------------------------------------------------------------------------------------------------------------------------------------------------------------------------------------------------------------------------------------------------------------------------------------------------------------------------------------------------------------------------------------------------------------------------------------------------------------------------------------------------------------------------------------------------------------------------------------------------------------------------------------------------------------------------------------------------------------------------------------------------------------------------------------------------------------------------------------------------------------------------------------------------------------------------------------------------------------------------------------------------------------------------------------------------------------------------------------------------------------------------------------------------------------------------------------------------------------------------------------------------------------------------------------------------------------------------------------------------------------------------------------------------------------------------------------------------------------------------------------------------------------------------------------------------------------------------------------------------------------------------------------------------------------------------------------------------------------------------------------------------------------------------------------------------------------------------------------------------------------------------------------------------------------------------------------------------------------------------------------------------------------------------------------------------------------------------|
| 306 | <p>ljs0A<br/>(124)</p> <hr/> <p>lizrA<br/>(124)</p> | C | 99.19  | <p><b>TM-align:</b> aliSize=115 (resi) RMSD=1.64 (Å)<br/> KETA<del>AAK</del>FERQH<del>MDSS</del>TSAA<del>SS</del>NYC<del>NQMM</del>KSR<del>NLTK</del>DR<del>CKPV</del>NTFVHESLADVOAVCSQKNVACKNGOTNCYQSYSTMSITDCRETGSSKYPNCA<del>YKTTQANKHI</del>IVACE<del>GNPY</del>vpvhfdasv-----<br/> KETA<del>AAK</del>FERQH<del>MDSS</del>TSAA<del>SS</del>NYC<del>NQMM</del>KSR<del>NLTK</del>DR<del>CKPV</del>NTFVHESLADVOAVCSQKNVACKNGOTNCYQSYSTMSITDCRETGSSKYPNCA<del>YKTTQANKHI</del>IVACE<del>GNPY</del>-----vpvhfdasv</p> <p><b>SARST:</b> aliSize=122 (resi) RMSD=6.29 (Å)<br/> k-<del>E</del>TAAAKFERQH<del>MDSS</del>TSAA<del>SS</del>NYC<del>NQMM</del>KSR<del>NLTK</del>DR<del>CKPV</del>NTFVHESLADVOAVCSQKNVACKNGOTNCYQSYSTMSITDCRETGSSKYPNCA<del>YKTTQANKHI</del>IVACE<del>GNPY</del>VPVHFDAS-v<br/> -k<del>E</del>TAAAKFERQH<del>MDSS</del>TSAA<del>SS</del>NYC<del>NQMM</del>KSR<del>NLTK</del>DR<del>CKPV</del>NTFVHESLADVOAVCSQKNVACKNGOTNCYQSYSTMSITDCRETGSSKYPNCA<del>YKTTQANKHI</del>IVACE<del>GNPY</del>VPVHFDASv-</p> <p><b>BLAST:</b> aliSize=123 (resi) iden=99.19% (123/124) simi=99.19% (123/124)<br/> KETA<del>AAK</del>FERQH<del>MDSS</del>TSAA<del>SS</del>NYC<del>NQMM</del>KSR<del>NLTK</del>DR<del>CKPV</del>NTFVHESLADVOAVCSQKNVACKNGOTNCYQSYSTMSITDCRETGSSKYPNCA<del>YKTTQANKHI</del>IVACE<del>GNPY</del>VPVHFDASV<br/> KETA<del>AAK</del>FERQH<del>MDSS</del>TSAA<del>SS</del>NYC<del>NQMM</del>KSR<del>NLTK</del>DR<del>CKPV</del>NTFVHESLADVOAVCSQKNVACKNGOTNCYQSYSTMSITDCRETGSSKYPNCA<del>YKTTQANKHI</del>IVACE<del>GNPY</del>VPVHFDASV</p> <p><b>Proposed:</b> aliSize=124 (resi) RMSD=1.05 (Å)<br/> KETA<del>AAK</del>FERQH<del>MDSS</del>TSAA<del>SS</del>NYC<del>NQMM</del>KSR<del>NLTK</del>DR<del>CKPV</del>NTFVHESLADVOAVCSQKNVACKNGOTNCYQSYSTMSITDCRETGSSKYPNCA<del>YKTTQANKHI</del>IVACE<del>GNPY</del>VPVHFDASV<br/> KETA<del>AAK</del>FERQH<del>MDSS</del>TSAA<del>SS</del>NYC<del>NQMM</del>KSR<del>NLTK</del>DR<del>CKPV</del>NTFVHESLADVOAVCSQKNVACKNGOTNCYQSYSTMSITDCRETGSSKYPNCA<del>YKTTQANKHI</del>IVACE<del>GNPY</del>VPVHFDASV</p> |
| 307 | <p>ljs0A<br/>(124)</p> <hr/> <p>lj80B<br/>(101)</p> | C | 100.00 | <p><b>TM-align:</b> aliSize=91 (resi) RMSD=1.23 (Å)<br/> ketaaakferqhmdsstsaasssNYC<del>NQMM</del>KSR<del>NLTK</del>DR<del>CKPV</del>NTFVHESLADVOAVCSQKNVACKNGOTNCYQSYSTMSITDCRETGSSKYPNCA<del>YKTTQANKHI</del>IVACE<del>GNPY</del>vpvhfdasv-----<br/> -----NYC<del>NQMM</del>KSR<del>NLTK</del>DR<del>CKPV</del>NTFVHESLADVOAVCSQKNVACKNGOTNCYQSYSTMSITDCRETGSSKYPNCA<del>YKTTQANKHI</del>IVACE<del>GNPY</del>-----yvpvhfdasv</p> <p><b>SARST:</b> aliSize=99 (resi) RMSD=6.89 (Å)<br/> ketaaakferqhmdsstsaasssNYC<del>NQMM</del>KSR<del>NLTK</del>DR<del>CKPV</del>NTFVHESLADVOAVCSQKNVACKNGOTNCYQSYSTMSITDCRETGSSKYPNCA<del>YKTTQANKHI</del>IVACE<del>GNPY</del>VPVHFDAS-v<br/> -----nNYC<del>NQMM</del>KSR<del>NLTK</del>DR<del>CKPV</del>NTFVHESLADVOAVCSQKNVACKNGOTNCYQSYSTMSITDCRETGSSKYPNCA<del>YKTTQANKHI</del>IVACE<del>GNPY</del>VPVHFDASv-</p> <p><b>BLAST:</b> aliSize=101 (resi) iden=100.00% (101/101) simi=100.00% (101/101)<br/> ketaaakferqhmdsstsaasssNYC<del>NQMM</del>KSR<del>NLTK</del>DR<del>CKPV</del>NTFVHESLADVOAVCSQKNVACKNGOTNCYQSYSTMSITDCRETGSSKYPNCA<del>YKTTQANKHI</del>IVACE<del>GNPY</del>VPVHFDASV<br/> -----NYC<del>NQMM</del>KSR<del>NLTK</del>DR<del>CKPV</del>NTFVHESLADVOAVCSQKNVACKNGOTNCYQSYSTMSITDCRETGSSKYPNCA<del>YKTTQANKHI</del>IVACE<del>GNPY</del>VPVHFDASV</p> <p><b>Proposed:</b> aliSize=101 (resi) RMSD=0.70 (Å)<br/> ketaaakferqhmdsstsaasssNYC<del>NQMM</del>KSR<del>NLTK</del>DR<del>CKPV</del>NTFVHESLADVOAVCSQKNVACKNGOTNCYQSYSTMSITDCRETGSSKYPNCA<del>YKTTQANKHI</del>IVACE<del>GNPY</del>VPVHFDASV<br/> -----NYC<del>NQMM</del>KSR<del>NLTK</del>DR<del>CKPV</del>NTFVHESLADVOAVCSQKNVACKNGOTNCYQSYSTMSITDCRETGSSKYPNCA<del>YKTTQANKHI</del>IVACE<del>GNPY</del>VPVHFDASV</p>                                                                                                                                                                                                                                                                                                                                         |
| 308 | <p>ljs0A<br/>(124)</p> <hr/> <p>lk5aA<br/>(118)</p> | C | 31.36  | <p><b>TM-align:</b> aliSize=105 (resi) RMSD=1.86 (Å)<br/> kETA<del>AAK</del>FERQH<del>MDSS</del>TSAA<del>SS</del>NYC<del>NQMM</del>KSR<del>NLTK</del>DR<del>CKPV</del>NTFVHESLADVOAVCS---QKNVackngqTNCYQSYSTMSITDCRETGSSKYPNCA<del>YKTTQANKHI</del>IVACE<del>GNPY</del>vpvhfdasv-----<br/> -NSRYTHELTHYDAKPOGR-DDRYCESIMRRRGLT-SPCKDINTFIHGNKRSIKAI<del>ENknGNPHR</del>-----ENLRISKSSFOVITKLGHGSPWPPOQRATAGFRNVVACEN-----lpvhldqsaa</p> <p><b>SARST:</b> aliSize=108 (resi) RMSD=4.68 (Å)<br/> ket--AAAKFERQH<del>MDSS</del>TSAA<del>SS</del>NYC<del>NQMM</del>KSR<del>NLTK</del>DR<del>CKPV</del>NTFVHESLADVOAVCS---SQKNVackngqTNCYQSYSTMSITDCRETGSSKYPNCA<del>YKTTQANKHI</del>IVACE<del>GNPY</del>VPVHFDAS-----dasv<br/> ---nsRYTHELTHYDAKPOGRDDRYCESIMRRRGLT-SPCKDINTFIHGNKRSIKAI<del>ENknGNPHR</del>-----ENLRISKSSFOVITKLGHGSPWPPOQRATAGFRNVVACEN--GLPVHLDqsaa----</p> <p><b>BLAST:</b> aliSize=60 (resi) iden=33.90% (40/118) simi=50.85% (60/118)<br/> ketaaak-----ERQH<del>MDSS</del>TSAA<del>SS</del>NYC<del>NQMM</del>KSR<del>NLTK</del>DR<del>CKPV</del>NTFVHESLADVOAVCSQKNVackngqTNCYQSYSTMSITDCRETGSSKYPNCA<del>YKTTQANKHI</del>IVACE<del>GNPY</del>VPVHFDAS--v<br/> -----nsrythELTHYDAKPOGRDDRYCESIMRRRGLTSPCKDINTFIHGNKRSIKAI<del>ENknGNPHR</del>-----NPHRENLRISKSSFOVITKLGHGSPWPPOQRATAGFRNVVACEN--LPVHLDQsaa-</p> <p><b>Proposed:</b> aliSize=113 (resi) RMSD=1.56 (Å)<br/> ke-TAAAKFERQH<del>MDSS</del>TSAA<del>SS</del>NYC<del>NQMM</del>KSR<del>NLTK</del>DR<del>CKPV</del>NTFVHESLADVOAVCS---QKNVackngqTNCYQSYSTMSITDCRETGSSKYPNCA<del>YKTTQANKHI</del>IVACE<del>GNPY</del>VPVHFDASV<br/> --nSRYTHELTHYDAKPOGRDDRYCESIMRRRGLT-SPCKDINTFIHGNKRSIKAI<del>ENknGNPHR</del>-----ENLRISKSSFOVITKLGHGSPWPPOQRATAGFRNVVACEN--GLPVHLDQsAA</p>                                                                                                                                                                                                                                                                                                                          |

|     |                                                     |   |       |                                                                                                                                                                                                                                                                                                                                                                                                                                                                                                                                                                                                                                                                                                                                                                                                                                                                                                                                                                                                                                                                                                                                                                                                                                                                                                                                                                                        |
|-----|-----------------------------------------------------|---|-------|----------------------------------------------------------------------------------------------------------------------------------------------------------------------------------------------------------------------------------------------------------------------------------------------------------------------------------------------------------------------------------------------------------------------------------------------------------------------------------------------------------------------------------------------------------------------------------------------------------------------------------------------------------------------------------------------------------------------------------------------------------------------------------------------------------------------------------------------------------------------------------------------------------------------------------------------------------------------------------------------------------------------------------------------------------------------------------------------------------------------------------------------------------------------------------------------------------------------------------------------------------------------------------------------------------------------------------------------------------------------------------------|
| 309 | <p>1js0A<br/>(124)</p> <hr/> <p>1kh8A<br/>(125)</p> | C | 98.39 | <p><b>TM-align:</b> aliSize=113 (resi) RMSD=0.92 (Å)<br/> - kETAAAKFERQHMDSSSTSAASSSNYCQMMKSRNLTKDRCKPVNTFVHESLADVOAVCSQKNVACKNGQTNCYQSYSTMSITDCRETGSSKYPNCAYKTTQANKHIIVACE--G-Npyvpvhfdasv-----<br/> m kETAAAKFERQHMDSSSTSAASSSNYCQMMKSRNLTKDRCKPVNTFVHESLADVOAVCSQKNVACKNGQTNCYQSYSTMSITDCRETGSSKYPNCAYKTTQANKHIIVACEEgnGyV-----pvhfdasv</p> <p><b>SARST:</b> aliSize=122 (resi) RMSD=6.37 (Å)<br/> k--ETAAAKFERQHMDSSSTSAASSSNYCQMMKSRNLTKDRCKPVNTFVHESLADVOAVCSQKNVACKNGQTNCYQSYSTMSITDCRETGSSKYPNCAYKTTQANKHIIVACEGPNPYVPVHFDA--v<br/> -mkETAAAKFERQHMDSSSTSAASSSNYCQMMKSRNLTKDRCKPVNTFVHESLADVOAVCSQKNVACKNGQTNCYQSYSTMSITDCRETGSSKYPNCAYKTTQANKHIIVACEGNGYVPVHFDA--v</p> <p><b>BLAST:</b> aliSize=123 (resi) iden=99.19% (123/124) simi=99.19% (123/124)<br/> - kETAAAKFERQHMDSSSTSAASSSNYCQMMKSRNLTKDRCKPVNTFVHESLADVOAVCSQKNVACKNGQTNCYQSYSTMSITDCRETGSSKYPNCAYKTTQANKHIIVACEGPNPYVPVHFDA--v<br/> m kETAAAKFERQHMDSSSTSAASSSNYCQMMKSRNLTKDRCKPVNTFVHESLADVOAVCSQKNVACKNGQTNCYQSYSTMSITDCRETGSSKYPNCAYKTTQANKHIIVACEGNGYVPVHFDA--v</p> <p><b>Proposed:</b> aliSize=122 (resi) RMSD=0.66 (Å)<br/> - kETAAAKFERQHMDSSSTSAASSSNYCQMMKSRNLTKDRCKPVNTFVHESLADVOAVCSQKNVACKNGQTNCYQSYSTMSITDCRETGSSKYPNCAYKTTQANKHIIVACE--GnpYVPVHFDA--v<br/> m kETAAAKFERQHMDSSSTSAASSSNYCQMMKSRNLTKDRCKPVNTFVHESLADVOAVCSQKNVACKNGQTNCYQSYSTMSITDCRETGSSKYPNCAYKTTQANKHIIVACEEgnG--YVPVHFDA--v</p> |
| 310 | <p>1js0A<br/>(124)</p> <hr/> <p>1kvzA<br/>(107)</p> | C | 26.17 | <p><b>TM-align:</b> aliSize=90 (resi) RMSD=2.66 (Å)<br/> kETAAAKFERQHMDSSSTSAASSSNYCQMMKSRNLTKDRCKPVNTFVHESLADVOAVCSQKNVACKNGQTNCYQSYSTMSITDCRETGSSKYPNCAYKTTQANKHIIVACEGPNPYVPVHFDA--v<br/> -MQDWITFKKKHLTD--I-WD---V--DCDNL--MPTSIfDCKDKNTFIYSLPGPKALCR-----gvifSADVLSNFEFLAEINVKPRK---PKYKLLKSSNRICIRCEHE-----pvhfagvgicp</p> <p><b>SARST:</b> aliSize=99 (resi) RMSD=8.20 (Å)<br/> keta---AAKFERQHMDSSSTSAASSSNYCQMMKSRNLTKDRCKPVNTFVHESLADVOAVCSQKNVACKNGQTNCYQSYSTMSITDCRETGSSKYPNCAYKTTQANKHIIVACEGPNPYVPVHFDA--v<br/> ---mqdWITFKKKHLTD--I-DTWVDCDNLMPSTLFD-----DKNTFIYSLPGPKALCRGVIFSA-----DVLNSFEFLAEINVKPRK---PKYKLLKSSNRICIRCEHE--LPVHFAGVgicp</p> <p><b>BLAST:</b> aliSize=53 (resi) iden=27.10% (29/107) simi=49.53% (53/107)<br/> ketaa----AKFERQHMDSSSTSAASSSNYCQMMKSRNLTKDRCKPVNTFVHESLADVOAVCSQKNVACKNGQTNCYQSYSTMSITDCRETGSSKYPNCAYKTTQANKHIIVACEGPNPYVPVHFDA--v<br/> -----mqdWITFKKKHLTD--I-DTWVDCDNLMPSTLFD-----DKNTFIYSLPGPKALCRGVIFSA-----DVLNSFEFLAEINVKPRK---PKYKLLKSSNRICIRCEHE--LPVHFAGVgicp</p> <p><b>Proposed:</b> aliSize=98 (resi) RMSD=2.08 (Å)<br/> ke-TAAAKFERQHMDSSSTSAASSSNYCQMMKSRNLTKDRCKPVNTFVHESLADVOAVCS-----qknvackngqtNCYQSYSTMSITDCRETGSSKYPNCAYKTTQANKHIIVACEGnpYVPVHFDA--v<br/> --mQDWITFKKKHLTD--I-WDV---DCDNLMPSTLFD-----DKNTFIYSLPGPKALCRGVIFSA-----ADVLSNFEFLAEINVKPRK---PKYKLLKSSNRICIRCEHE--ELPVHFAGVgicp</p>                      |
| 311 | <p>1js0A<br/>(124)</p> <hr/> <p>1m58A<br/>(106)</p> | C | 28.30 | <p><b>TM-align:</b> aliSize=91 (resi) RMSD=2.73 (Å)<br/> kETAAAKFERQHMDSSSTSAASSSNYCQMMKSRNLTKDRCKPVNTFVHESLADVOAVCSQKNVACKNGQTNCYQSYSTMSITDCRETGSSKYPNCAYKTTQANKHIIVACEGPNPYVPVHFDA--v<br/> -MQNWETFKKKHLTD--I-RDV---KDAEMKALFD---CKQKNTFIYARPGRVOALCKNI-----ivSKNVLSTDEFYLSDCNRILKLP---CHYKLLKSSNTICITENK-----lpvfvaveecp</p> <p><b>SARST:</b> aliSize=78 (resi) RMSD=7.87 (Å)<br/> ketaaakferqhmdsstsaasssn-----YCNQMMKSRNLTKDRCKPVNTFVHESLADVOAVCS---QKNVACKNGQTNCYQSYSTMSITDCRETGSSKYPNCAYKTTQANKHIIVACEGPNPYVPVHFDA--v<br/> -----mqnWETfqqkhltdtrdvkcdAEMKALFD-----CKQKNTFIYARPGRVOALCKNIIVSK-----NVLSTDEFYLSDCNRILKLP---CHYKLLKSSNTICITENK-----lpvfvaveecp</p> <p><b>BLAST:</b> aliSize=52 (resi) iden=31.13% (33/106) simi=49.06% (52/106)<br/> ketaaak----FERQHMDSSSTSAASSSNYCQMMKSRNLTKDRCKPVNTFVHESLADVOAVCSQKNVACKNGQTNCYQSYSTMSITDCRETGSSKYPNCAYKTTQANKHIIVACEGPNPYVPVHFDA--v<br/> -----mqnWETfqqkhltdtrdvkcdAEMKALFD---CKQKNTFIYARPGRVOALCKNIIVSKNVLSTDEFYLSDCNRILKLP---CHYKLLKSSNTICITENK--LPVHFVaveecp</p> <p><b>Proposed:</b> aliSize=97 (resi) RMSD=2.06 (Å)<br/> ke-TAAAKFERQHMDSSSTSAASSSNYCQMMKSRNLTKDRCKPVNTFVHESLADVOAVCS-----qknvackngqtNCYQSYSTMSITDCRETGSSKYPNCAYKTTQANKHIIVACEGnpYVPVHFDA--v<br/> --mQNWETfqqkhltdtrdvkcdAEMKALFD---CKQKNTFIYARPGRVOALCKNIIVSKNVLSTDEFYLSDCNRILKLP---CHYKLLKSSNTICITENK--LPVHFVaveecp</p>                                   |



|     |                                                     |   |       |                                                                                                                                                                                                                                                                                                                                                                                                                                                                                                                                                                                                                                                                                                                                                                                                                                                                                                                                                                                                                                                                                                                                                                                                                                                                                                                                                                           |
|-----|-----------------------------------------------------|---|-------|---------------------------------------------------------------------------------------------------------------------------------------------------------------------------------------------------------------------------------------------------------------------------------------------------------------------------------------------------------------------------------------------------------------------------------------------------------------------------------------------------------------------------------------------------------------------------------------------------------------------------------------------------------------------------------------------------------------------------------------------------------------------------------------------------------------------------------------------------------------------------------------------------------------------------------------------------------------------------------------------------------------------------------------------------------------------------------------------------------------------------------------------------------------------------------------------------------------------------------------------------------------------------------------------------------------------------------------------------------------------------|
| 312 | <p>1js0A<br/>(124)</p> <hr/> <p>1oj8A<br/>(105)</p> | C | 23.81 | <p><b>TM-align:</b> aliSize=91 (resi) RMSD=2.56 (Å)<br/> ketAAAKFERQHMDsStsAASsnYcNQMkSRNLTKdrCKPvNtFVHESLADVQAVCSQKNvackngq-TNCYQSYSTMSITDCREtGSSkypnCAKTTQANKHIIVACEGNpyvpvhfdasv-----<br/> ---DWDtFQKKHLT-DI-KKV---KIDVEMKALFD---CKKTNTIFARPPRVOALCKNIK-----nNTNVL-SRDVFYLPQCNRK-KLP---CHVRLDGSTNTCLTCKE-----pihfagvgkcp</p> <p><b>SARST:</b> aliSize=99 (resi) RMSD=7.48 (Å)<br/> keta-AAKFERQHMDsStsAASsnycnqMMKSRNLTKDRCKPvNtFVHESLADVQAVCSQKNvackngQTNCYQSYSTMSITDCREtGssYpNcAKTTQANKHIIVACeGNPYVPVHFDAS----v<br/> ----dWDtFQKKHLT-DIKKVK-----CDVEMKALFDCKKTNTIFARPPRVOALCKNIK-----NNTNVL-SRDVFYLPQCNRK---KLP-C-HVRLDGSTNTCLTCKE---MKELPIHFAGVgkcp-</p> <p><b>BLAST:</b> aliSize=48 (resi) iden=31.73% (33/105) simi=46.15% (48/105)<br/> ketaaak----FERQHMDsStsAASsnYcNQMkSRNLTKdrCKPvNtFVHESLADVQAVCSQKNvackngQTNCYQSYSTMSITDCREtGssSKYpNcAKTTQANKHIIVACeGNPYVPVHFDAS----dasv<br/> -----dwdtFQKKHLT-DIKKVK-----CDVEMKALFD---CKKTNTIFARPPRVOALCKNIK---KN-NNTNVL-SRDVFYLPQCNRK---KLP-C-HVRLDGSTNTCLTCKE---LPIHFAGVgkcp----</p> <p><b>Proposed:</b> aliSize=97 (resi) RMSD=1.84 (Å)<br/> keTAAAKFERQHMDsStsAASsnYcNQMkSRNLTKdrCKPvNtFVHESLADVQAVCS-----qknvackngqtTNCYQSYSTMSITDCREtGSSkypNcAKTTQANKHIIVACeGNPYVPVHFDASV---<br/> --PDWDtFQKKHLT-DIKKV---KIDVEMKALFD---CKKTNTIFARPPRVOALCKNIKnn-----TNVLSRDVFYLPQCNRK-KL---PCHVRLDGSTNTCLTCKE---ELPIHFAGVgkcp</p>    |
| 313 | <p>1js0A<br/>(124)</p> <hr/> <p>1pu3A<br/>(105)</p> | C | 26.67 | <p><b>TM-align:</b> aliSize=91 (resi) RMSD=2.44 (Å)<br/> kETAAAKFERQHMDsStsAASsnYcNQMkSRNLTKdrCKPvNtFVHESLADVQAVCSQKNvackngq---TNCYQSYSTMSITDCREtGSSkypnCAKTTQANKHIIVACeGNpyvpvhfdasv-----<br/> -MQDWLTfQKKHITN-I-RDV---DNDNLSTNLFH---CKDKNTFIYSRPEPKAICKG-----iiasKNVLTTFEFYLSDCNVTSRP---CKYKLLKSTNKFCVTCENQ-----apvhfvgvsc</p> <p><b>SARST:</b> aliSize=97 (resi) RMSD=7.56 (Å)<br/> keta---AAKFERQHMDsStsAASsnycnqMMKSRNLTKDRCKPvNtFVHESLADVQAVCSQKNvackngQT---TNCYQSYSTMSITDCREtGSSkypnCAKTTQANKHIIVACeGNPYVPVHFDAS---v<br/> ---mqdWLTfQKKHITN-I-RDvd-----CDNILSTNLFHCKDKNTFIYSRPEPKAICK-----GIiasKNVLTTFEFYLSDCNVTSRP---CKYKLLKSTNKFCVTCENQAPVHFDASVgsc-</p> <p><b>BLAST:</b> aliSize=54 (resi) iden=32.38% (34/105) simi=51.43% (54/105)<br/> ketaaak-----FERQHMDsStsAASsnYcNQMkSRNLTKdrCKPvNtFVHESLADVQAVCSQKNvackngQTNCYQSYSTMSITDCREtGssSKYpNcAKTTQANKHIIVACeGNPYVPVHFDAS----dasv<br/> -----mqdwlTFQKKHITNTRDvd-----CDNILSTNLFHCKDKNTFIYSRPEPKAICKGIIASKNVLTTFEFYLSDCNVT---SRP---CKYKLLKSTNKFCVTCENQ---APVHFDASVgsc----</p> <p><b>Proposed:</b> aliSize=97 (resi) RMSD=1.76 (Å)<br/> keTA-AAKFERQHMDsStsAASsnYcNQMkSRNLTKdrCKPvNtFVHESLADVQAVCS-----qknvackngqtTNCYQSYSTMSITDCREtGSSkypnCAKTTQANKHIIVACeGNPYVPVHFDASV---<br/> --MQdWLTfQKKHITN-I-RDV---DNDNLSTNLFH---CKDKNTFIYSRPEPKAICKGIIAS-----KNVLTTFEFYLSDCNVTSRP---CKYKLLKSTNKFCVTCENQ---QAPVHFDASVgsc</p> |
| 314 | <p>1js0A<br/>(124)</p> <hr/> <p>1qwqA<br/>(124)</p> | C | 75.81 | <p><b>TM-align:</b> aliSize=112 (resi) RMSD=2.52 (Å)<br/> KETAAAKFERQHMDsStsAASSN-YcNQMkSRNLTKDRCKPvNtFVHESLADVQAVCSQKNvackngqTNCYQSYSTMSITDCREtGSSkypNcAYKTTQANKHIIVACeGNpyvpvhfdasv-----<br/> KESAAAKFERQHMDsGNS-PSSSNycNLMCCRKMTOGKCKPvNtFVHESLADVQAVCSQKNvackngqTNCYQSYSTMSITDCREtGSSkypNcAYKTTQVEKHIIVACGGKPSVPVHFDASV-----svpvhfadasv</p> <p><b>SARST:</b> aliSize=119 (resi) RMSD=6.76 (Å)<br/> k--ETAAAKFERQHMDsStsAASSSNycN-QMkSRNLTKDRCKPvNtFVHESLADVQAVCSQKNvackngqTNCYQSYSTMSITDCREtGSSkypNcAYKTTQANKHIIVACeGNPYVPVHFDAS---v<br/> -keSAAAKFERQHMDsGNS-PSSSNycNLMCCRKMTOGKCKPvNtFVHESLADVQAVCSQKNvackngqTNCYQSYSTMSITDCREtGSSkypNcAYKTTQVEKHIIVACGGKPSVPVHFDASV-</p> <p><b>BLAST:</b> aliSize=107 (resi) iden=80.65% (100/124) simi=86.29% (107/124)<br/> KETAAAKFERQHMDsStsAASSSNycNQMkSRNLTKDRCKPvNtFVHESLADVQAVCSQKNvackngqTNCYQSYSTMSITDCREtGSSkypNcAYKTTQANKHIIVACeGNPYVPVHFDASV<br/> KESAAAKFERQHMDsGNS-PSSSNycNLMCCRKMTOGKCKPvNtFVHESLADVQAVCSQKNvackngqTNCYQSYSTMSITDCREtGSSkypNcAYKTTQVEKHIIVACGGKPSVPVHFDASV</p> <p><b>Proposed:</b> aliSize=119 (resi) RMSD=1.92 (Å)<br/> ke--TAAAKFERQHMDsStsAASSSNycNQMkSRNLTKDRCKPvNtFVHESLADVQAVCSQKNvackngqTNCYQSYSTMSITDCREtGSSkypNcAYKTTQANKHIIVACeGNPYVPVHFDASV<br/> --keSAAAKFERQHMDsGNS-PSSSNycNLMCCRKMTOGKCKPvNtFVHESLADVQAVCSQKNvackngqTNCYQSYSTMSITDCREtGSSkypNcAYKTTQVEKHIIVACGGKPSVPVHFDASV</p>      |

|     |                                                     |   |        |                                                                                                                                                                                                                                                                                                                                                                                                                                                                                                                                                                                                                                                                                                                                                                                                                                                                                                                                                                                                                                                                                                                                                                                                                                                                                                                                                                                                             |
|-----|-----------------------------------------------------|---|--------|-------------------------------------------------------------------------------------------------------------------------------------------------------------------------------------------------------------------------------------------------------------------------------------------------------------------------------------------------------------------------------------------------------------------------------------------------------------------------------------------------------------------------------------------------------------------------------------------------------------------------------------------------------------------------------------------------------------------------------------------------------------------------------------------------------------------------------------------------------------------------------------------------------------------------------------------------------------------------------------------------------------------------------------------------------------------------------------------------------------------------------------------------------------------------------------------------------------------------------------------------------------------------------------------------------------------------------------------------------------------------------------------------------------|
| 315 | <p>1js0A<br/>(124)</p> <hr/> <p>1rasA<br/>(123)</p> | C | 100.00 | <p><b>TM-align:</b> aliSize=113 (resi) RMSD=1.04 (Å)<br/> kETAAAKFERQHMDSSSTSAASSSNYCNOQMMKSRNLTKDRCKPVNTFVHESLADVOAVCSQKNVACKNGOTNCYQSYSTMSITDCRETGSSKYPNCAKTTQANKHIIVACEGNPYVPVHFDASV-----<br/> -ETAAAKFERQHMDSSSTSAASSSNYCNOQMMKSRNLTKDRCKPVNTFVHESLADVOAVCSQKNVACKNGOTNCYQSYSTMSITDCRETGSSKYPNCAKTTQANKHIIVACEGNPYVPVHFDASV-----yvpvhfdasv</p> <p><b>SARST:</b> aliSize=121 (resi) RMSD=6.26 (Å)<br/> ke-TAAAKFERQHMDSSSTSAASSSNYCNOQMMKSRNLTKDRCKPVNTFVHESLADVOAVCSQKNVACKNGOTNCYQSYSTMSITDCRETGSSKYPNCAKTTQANKHIIVACEGNPYVPVHFDASV-v<br/> --e-TAAAKFERQHMDSSSTSAASSSNYCNOQMMKSRNLTKDRCKPVNTFVHESLADVOAVCSQKNVACKNGOTNCYQSYSTMSITDCRETGSSKYPNCAKTTQANKHIIVACEGNPYVPVHFDASV-v</p> <p><b>BLAST:</b> aliSize=123 (resi) iden=100.00% (123/123) simi=100.00% (123/123)<br/> kETAAAKFERQHMDSSSTSAASSSNYCNOQMMKSRNLTKDRCKPVNTFVHESLADVOAVCSQKNVACKNGOTNCYQSYSTMSITDCRETGSSKYPNCAKTTQANKHIIVACEGNPYVPVHFDASV<br/> -ETAAAKFERQHMDSSSTSAASSSNYCNOQMMKSRNLTKDRCKPVNTFVHESLADVOAVCSQKNVACKNGOTNCYQSYSTMSITDCRETGSSKYPNCAKTTQANKHIIVACEGNPYVPVHFDASV</p> <p><b>Proposed:</b> aliSize=123 (resi) RMSD=0.54 (Å)<br/> kETAAAKFERQHMDSSSTSAASSSNYCNOQMMKSRNLTKDRCKPVNTFVHESLADVOAVCSQKNVACKNGOTNCYQSYSTMSITDCRETGSSKYPNCAKTTQANKHIIVACEGNPYVPVHFDASV<br/> -ETAAAKFERQHMDSSSTSAASSSNYCNOQMMKSRNLTKDRCKPVNTFVHESLADVOAVCSQKNVACKNGOTNCYQSYSTMSITDCRETGSSKYPNCAKTTQANKHIIVACEGNPYVPVHFDASV</p>                            |
| 316 | <p>1js0A<br/>(124)</p> <hr/> <p>1rmfA<br/>(120)</p> | C | 43.33  | <p><b>TM-align:</b> aliSize=111 (resi) RMSD=2.02 (Å)<br/> K-ETAAAKFERQHMDSSSTSAASSSNYCNOQMMKSRNLTKDRCKPVNTFVHESLADVOAVCSQKNVACKNGOTNCYQSYSTMSITDCRETGSSKYPNCAKTTQANKHIIVACEGNPYVPVHFDASV-----<br/> MqDGMYQRFRLROHVHPEE-TGGSDRYCNLMQRRKMLYHCKRFNTFTHEDIWNIRSIICSTTIQCKNGKMNCHEG--VVKVTDICRDTGSSRAPNCRVRAIASTRRVVIACEGNPYVPVHFDG---qvpvhfdg</p> <p><b>SARST:</b> aliSize=115 (resi) RMSD=5.06 (Å)<br/> ket---AAAKFERQHMDSSSTSAASSSNYCNOQMMKSRNLTKDRCKPVNTFVHESLADVOAVCSQKNVACKNGOTNCYQSYSTMSITDCRETGSSKYPNCAKTTQANKHIIVACEGNPYVPVHFDASV-asv<br/> ---mqdGMYQRFRLROHVHPEETGG-SDRYCNLMQRRKMLYHCKRFNTFTHEDIWNIRSIICSTTIQCKNGKMNCHEG--GVVKVTDICRDTGSSRAPNCRVRAIASTRRVVIACEGNPYVPVHFDG---g---</p> <p><b>BLAST:</b> aliSize=78 (resi) iden=43.33% (52/120) simi=65.00% (78/120)<br/> ketaaa-----KFERQHMDSSSTSAASSSNYCNOQMMKSRNLTKDRCKPVNTFVHESLADVOAVCSQKNVACKNGOTNCYQSYSTMSITDCRETGSSKYPNCAKTTQANKHIIVACEGNPYVPVHFDASV-asv<br/> -----mqdGMYQRFRLROHVHPEETGGSD-SDRYCNLMQRRKMLYHCKRFNTFTHEDIWNIRSIICSTTIQCKNGKMNCHEG--GVVKVTDICRDTGSSRAPNCRVRAIASTRRVVIACEGNPYVPVHFDG---g---</p> <p><b>Proposed:</b> aliSize=117 (resi) RMSD=1.31 (Å)<br/> ke---TAAAKFERQHMDSSSTSAASSSNYCNOQMMKSRNLTKDRCKPVNTFVHESLADVOAVCSQKNVACKNGOTNCYQSYSTMSITDCRETGSSKYPNCAKTTQANKHIIVACEGNPYVPVHFDASV<br/> --mqdGMYQRFRLROHVHPEETGG-SDRYCNLMQRRKMLYHCKRFNTFTHEDIWNIRSIICSTTIQCKNGKMNCHEG--VVKVTDICRDTGSSRAPNCRVRAIASTRRVVIACEGNPYVPVHFDG---</p> |
| 317 | <p>1js0A<br/>(124)</p> <hr/> <p>1rraA<br/>(124)</p> | C | 66.94  | <p><b>TM-align:</b> aliSize=115 (resi) RMSD=1.66 (Å)<br/> KETAAAKFERQHMDSSSTSAASSSNYCNOQMMKSRNLTKDRCKPVNTFVHESLADVOAVCSQKNVACKNGOTNCYQSYSTMSITDCRETGSSKYPNCAKTTQANKHIIVACEGNPYVPVHFDASV-----<br/> AESSADKFKROHMDTEGPKSSPTCYNOQMMKROGMTGSKCPVNTFVHESLADVOAVCSQGNVCKNGRNNCHKSSSTLRITDCRLKSSSKYPNCDITTDTSQKHIIVACEGNPYVPVHFDASV-----vpvhfdasv</p> <p><b>SARST:</b> aliSize=122 (resi) RMSD=6.28 (Å)<br/> k-TAAAKFERQHMDSSSTSAASSSNYCNOQMMKSRNLTKDRCKPVNTFVHESLADVOAVCSQKNVACKNGOTNCYQSYSTMSITDCRETGSSKYPNCAKTTQANKHIIVACEGNPYVPVHFDASV-v<br/> -a-ESSADKFKROHMDTEGPKSSPTCYNOQMMKROGMTGSKCPVNTFVHESLADVOAVCSQGNVCKNGRNNCHKSSSTLRITDCRLKSSSKYPNCDITTDTSQKHIIVACEGNPYVPVHFDASV-v</p> <p><b>BLAST:</b> aliSize=98 (resi) iden=66.94% (83/124) simi=79.03% (98/124)<br/> k-TAAAKFERQHMDSSSTSAASSSNYCNOQMMKSRNLTKDRCKPVNTFVHESLADVOAVCSQKNVACKNGOTNCYQSYSTMSITDCRETGSSKYPNCAKTTQANKHIIVACEGNPYVPVHFDASV<br/> -a-ESSADKFKROHMDTEGPKSSPTCYNOQMMKROGMTGSKCPVNTFVHESLADVOAVCSQGNVCKNGRNNCHKSSSTLRITDCRLKSSSKYPNCDITTDTSQKHIIVACEGNPYVPVHFDASV</p> <p><b>Proposed:</b> aliSize=124 (resi) RMSD=1.07 (Å)<br/> KETAAAKFERQHMDSSSTSAASSSNYCNOQMMKSRNLTKDRCKPVNTFVHESLADVOAVCSQKNVACKNGOTNCYQSYSTMSITDCRETGSSKYPNCAKTTQANKHIIVACEGNPYVPVHFDASV<br/> AESSADKFKROHMDTEGPKSSPTCYNOQMMKROGMTGSKCPVNTFVHESLADVOAVCSQGNVCKNGRNNCHKSSSTLRITDCRLKSSSKYPNCDITTDTSQKHIIVACEGNPYVPVHFDASV</p>                                             |



|     |                                                     |   |        |                                                                                                                                                                                                                                                                                                                                                                                                                                                                                                                                                                                                                                                                                                                                                                                                                                                                                                                                                                                                                                                                                                                                                                                                                                                                                                                                                               |
|-----|-----------------------------------------------------|---|--------|---------------------------------------------------------------------------------------------------------------------------------------------------------------------------------------------------------------------------------------------------------------------------------------------------------------------------------------------------------------------------------------------------------------------------------------------------------------------------------------------------------------------------------------------------------------------------------------------------------------------------------------------------------------------------------------------------------------------------------------------------------------------------------------------------------------------------------------------------------------------------------------------------------------------------------------------------------------------------------------------------------------------------------------------------------------------------------------------------------------------------------------------------------------------------------------------------------------------------------------------------------------------------------------------------------------------------------------------------------------|
| 321 | <p>1js0A<br/>(124)</p> <hr/> <p>1yv7A<br/>(102)</p> | C | 28.43  | <p><b>TM-align:</b> aliSize=90 (resi) RMSD=2.54 (Å)<br/> ketAAAKFERQHMDsSsAASsnYCNQMKSRNLTKdrCKPVNTFVHESLADVOAVCSQkNvackngq--TNCYQSYSTMSITDCREIGSSkypnCAVKTTOANKHIIVACEGnpYvpvhfdasv-----<br/> ---DWLTFQKKHITNTRDV---DCDNI MSTNLFH---CKDKNTHIYSRPEPKAICKGIASKNVLITTEFYLSDCNVTSRP---CKYKLLKSTNKFSVTCENQ-----apvhfvvg</p> <p><b>SARST:</b> aliSize=98 (resi) RMSD=7.20 (Å)<br/> keta-AAKFERQHMDsSsAASsnYCNQMKSRNLTKdrCKPVNTFVHESLADVOAVCSQKNVACKngqtnCYQSYSTMSITDCREIGSSkypnCAVKTTOANKHIIVACEGnpYVPVHEDA--sv<br/> ---dWLTfQKKHITNTRDV---DCDNI MSTNLFH---CKDKNTHIYSRPEPKAICKGIASKNVLITTEFYLSDCNVTSRP---CKYKLLKSTNKFSVTCEN--QAPVHfVgvg--</p> <p><b>BLAST:</b> aliSize=54 (resi) iden=34.65% (35/102) simi=53.47% (54/102)<br/> ketaaak----FERQHMDsSsAASsnYCNQMKSRNLTKdrCKPVNTFVHESLADVOAVCSQKNVACKngqtnCYQSYSTMSITDCREIGSSkypnCAVKTTOANKHIIVACEGnpYVPVHEDA--sv<br/> -----dwlTfQKKHITNTRDV---DCDNI MSTNLFH---CKDKNTHIYSRPEPKAICKGIASKNVLITTEFYLSDCNVTSRP---CKYKLLKSTNKFSVTCENQ--APVHfVgvg----</p> <p><b>Proposed:</b> aliSize=97 (resi) RMSD=1.83 (Å)<br/> keTAAAKFERQHMDsSsAASsnYCNQMKSRNLTKdrCKPVNTFVHESLADVOAVCS-----qknvackngqtNCYQSYSTMSITDCREIGSSkypnCAVKTTOANKHIIVACEGnpYVPVHEDASV<br/> --PDWLTfQKKHITNTRDV---DCDNI MSTNLFH---CKDKNTHIYSRPEPKAICKGIASKNVLITTEFYLSDCNVTSRP---CKYKLLKSTNKFSVTCEN--QAPVHfVgvg</p>                                              |
| 322 | <p>1js0A<br/>(124)</p> <hr/> <p>2aasA<br/>(124)</p> | C | 100.00 | <p><b>TM-align:</b> aliSize=114 (resi) RMSD=1.62 (Å)<br/> KETAAAKFERQHMDsSsAASsnYCNQMKSRNLTKDRCKPVNTFVHESLADVOAVCSQKNVACKNGQTNCYQSYSTMSITDCRETGSSKYPNCAVKTTOANKHIIVACEGnpYvpvhfdasv-----<br/> KETAAAKFERQHMDsSsAASsnYCNQMKSRNLTKDRCKPVNTFVHESLADVOAVCSQKNVACKNGQTNCYQSYSTMSITDCRETGSSKYPNCAVKTTOANKHIIVACEGnpYvpvhfdasv-----</p> <p><b>SARST:</b> aliSize=119 (resi) RMSD=6.44 (Å)<br/> keta----AAKFERQHMDsSsAASsnYCNQMKSRNLTKDRCKPVNTFVHESLADVOAVCSQKNVACKNGQTNCYQSYSTMSITDCRETGSSKYPNCAVKTTOANKHIIVACEGnpYVPVHFDAS--v<br/> ----ketaAAKFERQHMDsSsAASsnYCNQMKSRNLTKDRCKPVNTFVHESLADVOAVCSQKNVACKNGQTNCYQSYSTMSITDCRETGSSKYPNCAVKTTOANKHIIVACEGnpYVPVHFDASv-</p> <p><b>BLAST:</b> aliSize=124 (resi) iden=100.00% (124/124) simi=100.00% (124/124)<br/> KETAAAKFERQHMDsSsAASsnYCNQMKSRNLTKDRCKPVNTFVHESLADVOAVCSQKNVACKNGQTNCYQSYSTMSITDCRETGSSKYPNCAVKTTOANKHIIVACEGnpYVPVHFDASV<br/> KETAAAKFERQHMDsSsAASsnYCNQMKSRNLTKDRCKPVNTFVHESLADVOAVCSQKNVACKNGQTNCYQSYSTMSITDCRETGSSKYPNCAVKTTOANKHIIVACEGnpYVPVHFDASV</p> <p><b>Proposed:</b> aliSize=124 (resi) RMSD=1.27 (Å)<br/> KETAAAKFERQHMDsSsAASsnYCNQMKSRNLTKDRCKPVNTFVHESLADVOAVCSQKNVACKNGQTNCYQSYSTMSITDCRETGSSKYPNCAVKTTOANKHIIVACEGnpYVPVHFDASV<br/> KETAAAKFERQHMDsSsAASsnYCNQMKSRNLTKDRCKPVNTFVHESLADVOAVCSQKNVACKNGQTNCYQSYSTMSITDCRETGSSKYPNCAVKTTOANKHIIVACEGnpYVPVHFDASV</p>                    |
| 323 | <p>1js0A<br/>(124)</p> <hr/> <p>2e0jA<br/>(128)</p> | C | 68.55  | <p><b>TM-align:</b> aliSize=113 (resi) RMSD=1.50 (Å)<br/> KETAAAKFERQHMDsSsAASsnYCNQMKSRNLTKDRCKPVNTFVHESLADVOAVCSQKNVACKNGQTNCYQSYSTMSITDCRETGSSKYPNCAVKTTOANKHIIVACEGnpYvpvhfdasv-----<br/> KESRAKkFQROHMDsSsPSSSSTYCNQMKSRNLTKDRCKPVNTFVHESLADVOAVCSQKNVACKNGQTNCYQSYSTMSITDCRETGSSKYPNCAVKTTOANKHIIVACEGnpYvpvhfdasvedst</p> <p><b>SARST:</b> aliSize=122 (resi) RMSD=6.26 (Å)<br/> k-ETAAAKFERQHMDsSsAASsnYCNQMKSRNLTKDRCKPVNTFVHESLADVOAVCSQKNVACKNGQTNCYQSYSTMSITDCRETGSSKYPNCAVKTTOANKHIIVACEGnpYVPVHFDAS-----v<br/> -kESRAKkFQROHMDsSsPSSSSTYCNQMKSRNLTKDRCKPVNTFVHESLADVOAVCSQKNVACKNGQTNCYQSYSTMSITDCRETGSSKYPNCAVKTTOANKHIIVACEGnpYVPVHFDASvedst-</p> <p><b>BLAST:</b> aliSize=101 (resi) iden=70.16% (87/124) simi=81.45% (101/124)<br/> KETAAAKFERQHMDsSsAASsnYCNQMKSRNLTKDRCKPVNTFVHESLADVOAVCSQKNVACKNGQTNCYQSYSTMSITDCRETGSSKYPNCAVKTTOANKHIIVACEGnpYVPVHFDASV-----<br/> KESRAKkFQROHMDsSsPSSSSTYCNQMKSRNLTKDRCKPVNTFVHESLADVOAVCSQKNVACKNGQTNCYQSYSTMSITDCRETGSSKYPNCAVKTTOANKHIIVACEGnpYVPVHFDASVedst</p> <p><b>Proposed:</b> aliSize=123 (resi) RMSD=1.08 (Å)<br/> KETAAAKFERQHMDsSsAASsnYCNQMKSRNLTKDRCKPVNTFVHESLADVOAVCSQKNVACKNGQTNCYQSYSTMSITDCRETGSSKYPNCAVKTTOANKHIIVACEGnpYVPVHFDASV-----<br/> KESRAKkFQROHMDsSsPSSSSTYCNQMKSRNLTKDRCKPVNTFVHESLADVOAVCSQKNVACKNGQTNCYQSYSTMSITDCRETGSSKYPNCAVKTTOANKHIIVACEGnpYVPVHFDASVedst</p> |

|     |                                                     |   |       |                                                                                                                                                                                                                                                                                                                                                                                                                                                                                                                                                                                                                                                                                                                                                                                                                                                                                                                                                                                                                                                                                                                                                                                                                                                                                                                                                                                       |
|-----|-----------------------------------------------------|---|-------|---------------------------------------------------------------------------------------------------------------------------------------------------------------------------------------------------------------------------------------------------------------------------------------------------------------------------------------------------------------------------------------------------------------------------------------------------------------------------------------------------------------------------------------------------------------------------------------------------------------------------------------------------------------------------------------------------------------------------------------------------------------------------------------------------------------------------------------------------------------------------------------------------------------------------------------------------------------------------------------------------------------------------------------------------------------------------------------------------------------------------------------------------------------------------------------------------------------------------------------------------------------------------------------------------------------------------------------------------------------------------------------|
| 324 | <p>1js0A<br/>(124)</p> <hr/> <p>2e0IA<br/>(128)</p> | C | 69.35 | <p><b>TM-align:</b> aliSize=115 (resi) RMSD=1.52 (Å)<br/> KETAIAKFERQHMDSSSTAAASSNYCNQMMKSRNLTQDRCKPVNTFVHESLADVQAVCSQKNVACKNGGTNCYQSYSTMSITDCREIIGSSKYPNCAYKTTQANKHIIVACEGNPYvpvhfdasv-----<br/> KESRAKKEFORQHMDSDSSPSSSTYCNLMMLLRNMTQGRCKPVNTFVHEPLVDVQNVCFQEKVTCKNGGNCYKSNSSMHIIDCRLINGSRYPNCAYRTSPKERHIIVACEGSPY-----vpvhfdasvedst</p> <p><b>SARST:</b> aliSize=120 (resi) RMSD=6.28 (Å)<br/> ke--TAAKFERQHMDSSSTAAASSNYCNQMMKSRNLTQDRCKPVNTFVHESLADVQAVCSQKNVACKNGGTNCYQSYSTMSITDCREIIGSSKYPNCAYKTTQANKHIIVACEGNPYVPVHFDAS-----v<br/> --keSRAKKEFORQHMDSDSSPSSSTYCNLMMLLRNMTQGRCKPVNTFVHEPLVDVQNVCFQEKVTCKNGGNCYKSNSSMHIIDCRLINGSRYPNCAYRTSPKERHIIVACEGSPYVPVHFDASvedst-</p> <p><b>BLAST:</b> aliSize=100 (resi) iden=69.35% (86/124) simi=80.65% (100/124)<br/> KETAIAKFERQHMDSSSTAAASSNYCNQMMKSRNLTQDRCKPVNTFVHESLADVQAVCSQKNVACKNGGTNCYQSYSTMSITDCREIIGSSKYPNCAYKTTQANKHIIVACEGNPYVPVHFDASV----<br/> KESRAKKEFORQHMDSDSSPSSSTYCNLMMLLRNMTQGRCKPVNTFVHEPLVDVQNVCFQEKVTCKNGGNCYKSNSSMHIIDCRLINGSRYPNCAYRTSPKERHIIVACEGSPYVPVHFDASVedst</p> <p><b>Proposed:</b> aliSize=124 (resi) RMSD=0.88 (Å)<br/> KETAIAKFERQHMDSSSTAAASSNYCNQMMKSRNLTQDRCKPVNTFVHESLADVQAVCSQKNVACKNGGTNCYQSYSTMSITDCREIIGSSKYPNCAYKTTQANKHIIVACEGNPYVPVHFDASV----<br/> KESRAKKEFORQHMDSDSSPSSSTYCNLMMLLRNMTQGRCKPVNTFVHEPLVDVQNVCFQEKVTCKNGGNCYKSNSSMHIIDCRLINGSRYPNCAYRTSPKERHIIVACEGSPYVPVHFDASVedst</p> |
| 325 | <p>1js0A<br/>(124)</p> <hr/> <p>2e0mA<br/>(128)</p> | C | 69.35 | <p><b>TM-align:</b> aliSize=115 (resi) RMSD=1.53 (Å)<br/> KETAIAKFERQHMDSSSTAAASSNYCNQMMKSRNLTQDRCKPVNTFVHESLADVQAVCSQKNVACKNGGTNCYQSYSTMSITDCREIIGSSKYPNCAYKTTQANKHIIVACEGNPYvpvhfdasv-----<br/> KESRAKKEFORQHMDSDSSPSSSLYCNLMMLLRNMTQGRCKPVNTFVHEPLVDVQNVCFQEKVTCKNGGNCYKSNSSMHIIDCRLINGSRYPNCAYRTSPKERHIIVACEGSPY-----vpvhfdasvedst</p> <p><b>SARST:</b> aliSize=121 (resi) RMSD=6.27 (Å)<br/> ke--TAAKFERQHMDSSSTAAASSNYCNQMMKSRNLTQDRCKPVNTFVHESLADVQAVCSQKNVACKNGGTNCYQSYSTMSITDCREIIGSSKYPNCAYKTTQANKHIIVACEGNPYVPVHFDAS-----v<br/> --keSRAKKEFORQHMDSDSSPSSSLYCNLMMLLRNMTQGRCKPVNTFVHEPLVDVQNVCFQEKVTCKNGGNCYKSNSSMHIIDCRLINGSRYPNCAYRTSPKERHIIVACEGSPYVPVHFDASvedst-</p> <p><b>BLAST:</b> aliSize=100 (resi) iden=69.35% (86/124) simi=80.65% (100/124)<br/> KETAIAKFERQHMDSSSTAAASSNYCNQMMKSRNLTQDRCKPVNTFVHESLADVQAVCSQKNVACKNGGTNCYQSYSTMSITDCREIIGSSKYPNCAYKTTQANKHIIVACEGNPYVPVHFDASV----<br/> KESRAKKEFORQHMDSDSSPSSSLYCNLMMLLRNMTQGRCKPVNTFVHEPLVDVQNVCFQEKVTCKNGGNCYKSNSSMHIIDCRLINGSRYPNCAYRTSPKERHIIVACEGSPYVPVHFDASVedst</p> <p><b>Proposed:</b> aliSize=124 (resi) RMSD=0.88 (Å)<br/> KETAIAKFERQHMDSSSTAAASSNYCNQMMKSRNLTQDRCKPVNTFVHESLADVQAVCSQKNVACKNGGTNCYQSYSTMSITDCREIIGSSKYPNCAYKTTQANKHIIVACEGNPYVPVHFDASV----<br/> KESRAKKEFORQHMDSDSSPSSSLYCNLMMLLRNMTQGRCKPVNTFVHEPLVDVQNVCFQEKVTCKNGGNCYKSNSSMHIIDCRLINGSRYPNCAYRTSPKERHIIVACEGSPYVPVHFDASVedst</p> |
| 326 | <p>1js0A<br/>(124)</p> <hr/> <p>2e0oA<br/>(126)</p> | C | 68.55 | <p><b>TM-align:</b> aliSize=113 (resi) RMSD=1.38 (Å)<br/> KETAIAKFERQHMDSSSTAAASSNYCNQMMKSRNLTQDRCKPVNTFVHESLADVQAVCSQKNVACKNGGTNCYQSYSTMSITDCREIIGSSKYPNCAYKTTQANKHIIVACEGNPYvpvhfdasv-----<br/> KESRAKKEFORQHMDSDSSPSSSTYCNQMMRRRNMTQGRCKPVNTFVHEPLLLVQLVCLQEKVTCKNGGNCYKSNSSMHIIDCRLINGSRYPNCAYRTSPKERHIIVACEGSPY-----yvpvhfdasved</p> <p><b>SARST:</b> aliSize=122 (resi) RMSD=6.29 (Å)<br/> k--TAAKFERQHMDSSSTAAASSNYCNQMMKSRNLTQDRCKPVNTFVHESLADVQAVCSQKNVACKNGGTNCYQSYSTMSITDCREIIGSSKYPNCAYKTTQANKHIIVACEGNPYVPVHFDAS---v<br/> -kSRAKKEFORQHMDSDSSPSSSTYCNQMMRRRNMTQGRCKPVNTFVHEPLLLVQLVCLQEKVTCKNGGNCYKSNSSMHIIDCRLINGSRYPNCAYRTSPKERHIIVACEGSPYVPVHFDASved-</p> <p><b>BLAST:</b> aliSize=101 (resi) iden=69.35% (86/124) simi=81.45% (101/124)<br/> KETAIAKFERQHMDSSSTAAASSNYCNQMMKSRNLTQDRCKPVNTFVHESLADVQAVCSQKNVACKNGGTNCYQSYSTMSITDCREIIGSSKYPNCAYKTTQANKHIIVACEGNPYVPVHFDASV--<br/> KESRAKKEFORQHMDSDSSPSSSTYCNQMMRRRNMTQGRCKPVNTFVHEPLLLVQLVCLQEKVTCKNGGNCYKSNSSMHIIDCRLINGSRYPNCAYRTSPKERHIIVACEGSPYVPVHFDASVed</p> <p><b>Proposed:</b> aliSize=123 (resi) RMSD=1.02 (Å)<br/> KETAIAKFERQHMDSSSTAAASSNYCNQMMKSRNLTQDRCKPVNTFVHESLADVQAVCSQKNVACKNGGTNCYQSYSTMSITDCREIIGSSKYPNCAYKTTQANKHIIVACEGNPYVPVHFDASV--<br/> KESRAKKEFORQHMDSDSSPSSSTYCNQMMRRRNMTQGRCKPVNTFVHEPLLLVQLVCLQEKVTCKNGGNCYKSNSSMHIIDCRLINGSRYPNCAYRTSPKERHIIVACEGSPYVPVHFDASVed</p>                 |

|     |                                             |   |       |                                                                                                                                                                                                                                                                                                                                                                                                                                                                                                                                                                                                                                                                                                                                                                                                                                                                                                                                                                                                                                                                                                                                                                                                                                                                                                                                                                                                                             |
|-----|---------------------------------------------|---|-------|-----------------------------------------------------------------------------------------------------------------------------------------------------------------------------------------------------------------------------------------------------------------------------------------------------------------------------------------------------------------------------------------------------------------------------------------------------------------------------------------------------------------------------------------------------------------------------------------------------------------------------------------------------------------------------------------------------------------------------------------------------------------------------------------------------------------------------------------------------------------------------------------------------------------------------------------------------------------------------------------------------------------------------------------------------------------------------------------------------------------------------------------------------------------------------------------------------------------------------------------------------------------------------------------------------------------------------------------------------------------------------------------------------------------------------|
| 327 | <p>1js0A (124)</p> <hr/> <p>2e0oB (125)</p> | C | 69.35 | <p><b>TM-align:</b> aliSize=115 (resi) RMSD=1.66 (Å)<br/> -kETAIAAKFERQHMDSSSTAASSSNYCNOQMKSRNLTkdRCKPVNTFVHESLADVQAVCSQKNVACKNGQTCYQSYSTMSITDCREIGSSKYPNCAYKTTQANKHIIVACEGNPYvpvhfdasv-----<br/> -mKESRAKFKFQROHMDSDSSPSSSSTYCNOQMRNRNMTQGRCKPVNTFVHEPLLVQVQVCFQEKVTCKNGGNCYKSNSSMHI TDCRLINGSRYPNCAYRTSPKERHIIVACEGSPY-----vpvhfdasv</p> <p><b>SARST:</b> aliSize=122 (resi) RMSD=6.30 (Å)<br/> k--ETAIAAKFERQHMDSSSTAASSSNYCNOQMKSRNLTkdRCKPVNTFVHESLADVQAVCSQKNVACKNGQTCYQSYSTMSITDCREIGSSKYPNCAYKTTQANKHIIVACEGNPYVPVHFDA--v<br/> -mKESRAKFKFQROHMDSDSSPSSSSTYCNOQMRNRNMTQGRCKPVNTFVHEPLLVQVQVCFQEKVTCKNGGNCYKSNSSMHI TDCRLINGSRYPNCAYRTSPKERHIIVACEGSPYVPVHFDA--v</p> <p><b>BLAST:</b> aliSize=101 (resi) iden=69.35% (86/124) simi=81.45% (101/124)<br/> -kETAIAAKFERQHMDSSSTAASSSNYCNOQMKSRNLTkdRCKPVNTFVHESLADVQAVCSQKNVACKNGQTCYQSYSTMSITDCREIGSSKYPNCAYKTTQANKHIIVACEGNPYVPVHFDA--v<br/> -mKESRAKFKFQROHMDSDSSPSSSSTYCNOQMRNRNMTQGRCKPVNTFVHEPLLVQVQVCFQEKVTCKNGGNCYKSNSSMHI TDCRLINGSRYPNCAYRTSPKERHIIVACEGSPYVPVHFDA--v</p> <p><b>Proposed:</b> aliSize=124 (resi) RMSD=1.12 (Å)<br/> -kETAIAAKFERQHMDSSSTAASSSNYCNOQMKSRNLTkdRCKPVNTFVHESLADVQAVCSQKNVACKNGQTCYQSYSTMSITDCREIGSSKYPNCAYKTTQANKHIIVACEGNPYVPVHFDA--v<br/> -mKESRAKFKFQROHMDSDSSPSSSSTYCNOQMRNRNMTQGRCKPVNTFVHEPLLVQVQVCFQEKVTCKNGGNCYKSNSSMHI TDCRLINGSRYPNCAYRTSPKERHIIVACEGSPYVPVHFDA--v</p>                                                 |
| 328 | <p>1js0A (124)</p> <hr/> <p>2hkyA (129)</p> | C | 41.94 | <p><b>TM-align:</b> aliSize=105 (resi) RMSD=2.47 (Å)<br/> ---EIAAAKFERQHMDSSSTAASSSNYCNOQMKSRNLTkdRCKPVNTFVHESLADVQAVCSQKNVACKNGQTCYQSYSTMSITDCREIGSSKYPNCAYKTTQANKHIIVACEGNPYvpvhfdasv-----<br/> mkpLgMTSSQWFKIQHMOPSP---Q---ACNSAMK---NINKhtKCKDLNTEFLHEPFSSVAATQTPKIAC-KNgDKNCHOSHGPVSLTMCKLI-SGKYPNCRKYEKRQNSYVVACKPPQK-----kdsqqfhlvpvhldrv1</p> <p><b>SARST:</b> aliSize=113 (resi) RMSD=7.66 (Å)<br/> keta-----AAKFERQHMDSSSTAASSSNYCNOQMKSRNLTkdRCKPVNTFVHESLADVQAVCSQKNVACKNGQTCYQSYSTMSITDCREIGSSKYPNCAYKTTQANKHIIVACEGNP-----YVPVHFDA--v<br/> ---mkpLgMTSSQWFKIQHMOPSPQAC-NSAMKNINKHTK---RCKDLNTEFLHEPFSSVAATQTPKIACKNGDKNCHOSHGPVSLTMCKLI-TSGKYPNCRKYEKRQNSYVVACKPPQKkdsqqfhlvpvhldrv1</p> <p><b>BLAST:</b> aliSize=71 (resi) iden=43.55% (54/124) simi=57.26% (71/124)<br/> ke-----IAAAKFERQHMDSSSTAASSSNYCNOQMKSRNLTkdRCKPVNTFVHESLADVQAVCSQKNVACKNGQTCYQSYSTMSITDCREIGSSKYPNCAYKTTQANKHIIVACEGNPY-----YVPVHFDA--v<br/> ---mkpLgMTSSQWFKIQHMOPSPQAC-NSAMKNINKHTKCKDLNTEFLHEPFSSVAATQTPKIACKNGDKNCHOSHGPVSLTMCKLI-SGKYPNCRKYEKRQNSYVVACKPPQKkdsqqfhlvpvhldrv1</p> <p><b>Proposed:</b> aliSize=112 (resi) RMSD=1.86 (Å)<br/> ---EIAAAKFERQHMDSSSTAASSSNYCNOQMKSRNLTkdRCKPVNTFVHESLADVQAVCSQKNVACKNGQTCYQSYSTMSITDCREIGSSKYPNCAYKTTQANKHIIVACEGNP-----YVPVHFDA--v<br/> mkpLgMTSSQWFKIQHMOPSPQAC-NSAMK---NINKhtKCKDLNTEFLHEPFSSVAATQTPKIAC-KNgDKNCHOSHGPVSLTMCKLI-SGKYPNCRKYEKRQNSYVVACKPPQKkdsqqfhlvpvhldrv1</p> |
| 329 | <p>1js0A (124)</p> <hr/> <p>2k11A (127)</p> | C | 69.35 | <p><b>TM-align:</b> aliSize=113 (resi) RMSD=1.92 (Å)<br/> KETAIAAKFERQHMDSSSTAASSSNYCNOQMKSRNLTkdRCKPVNTFVHESLADVQAVCSQKNVACKNGQTCYQSYSTMSITDCREIGSSKYPNCAYKTTQANKHIIVACEGNPYvpvhfdasv-----<br/> KESRAKFKFQROHMDSDSSPSSSSTYCNOQMRNRNMTQGRCKPVNTFVHEPLVDVQVQVCFQEKVTCKNGGNCYKSNSSMHI TDCRLINGSRYPNCAYRTSPKERHIIVACEGSPY-----yvpvhfdasveds</p> <p><b>SARST:</b> aliSize=121 (resi) RMSD=5.81 (Å)<br/> k-ETAIAAKFERQHMDSSSTAASSSNYCNOQMKSRNLTkdRCKPVNTFVHESLADVQAVCSQKNVACKNGQTCYQSYSTMSITDCREIGSSKYPNCAYKTTQANKHIIVACEGNPYVPVHFDA-----sv<br/> -kESRAKFKFQROHMDSDSSPSSSSTYCNOQMRNRNMTQGRCKPVNTFVHEPLVDVQVQVCFQEKVTCKNGGNCYKSNSSMHI TDCRLINGSRYPNCAYRTSPKERHIIVACEGSPYVPVHFDA--sveds--</p> <p><b>BLAST:</b> aliSize=102 (resi) iden=70.16% (87/124) simi=82.26% (102/124)<br/> KETAIAAKFERQHMDSSSTAASSSNYCNOQMKSRNLTkdRCKPVNTFVHESLADVQAVCSQKNVACKNGQTCYQSYSTMSITDCREIGSSKYPNCAYKTTQANKHIIVACEGNPYVPVHFDA--v<br/> KESRAKFKFQROHMDSDSSPSSSSTYCNOQMRNRNMTQGRCKPVNTFVHEPLVDVQVQVCFQEKVTCKNGGNCYKSNSSMHI TDCRLINGSRYPNCAYRTSPKERHIIVACEGSPYVPVHFDA--v</p> <p><b>Proposed:</b> aliSize=123 (resi) RMSD=1.63 (Å)<br/> k-ETAIAAKFERQHMDSSSTAASSSNYCNOQMKSRNLTkdRCKPVNTFVHESLADVQAVCSQKNVACKNGQTCYQSYSTMSITDCREIGSSKYPNCAYKTTQANKHIIVACEGNPYVPVHFDA--v<br/> -kESRAKFKFQROHMDSDSSPSSSSTYCNOQMRNRNMTQGRCKPVNTFVHEPLVDVQVQVCFQEKVTCKNGGNCYKSNSSMHI TDCRLINGSRYPNCAYRTSPKERHIIVACEGSPYVPVHFDA--v</p>                                        |

|     |                                                     |   |       |                                                                                                                                                                                                                                                                                                                                                                                                                                                                                                                                                                                                                                                                                                                                                                                                                                                                                                                                                                                                                                                                                                                                                                                                                                                                                                                                                                                                                                                                                                                                                                                                                                                                                                                                                                                                                                                                                                                                                                                                                                                                                                                                                                                                                                                                                                                                                                                                                                                                                                                                                                                                                                                                                                        |
|-----|-----------------------------------------------------|---|-------|--------------------------------------------------------------------------------------------------------------------------------------------------------------------------------------------------------------------------------------------------------------------------------------------------------------------------------------------------------------------------------------------------------------------------------------------------------------------------------------------------------------------------------------------------------------------------------------------------------------------------------------------------------------------------------------------------------------------------------------------------------------------------------------------------------------------------------------------------------------------------------------------------------------------------------------------------------------------------------------------------------------------------------------------------------------------------------------------------------------------------------------------------------------------------------------------------------------------------------------------------------------------------------------------------------------------------------------------------------------------------------------------------------------------------------------------------------------------------------------------------------------------------------------------------------------------------------------------------------------------------------------------------------------------------------------------------------------------------------------------------------------------------------------------------------------------------------------------------------------------------------------------------------------------------------------------------------------------------------------------------------------------------------------------------------------------------------------------------------------------------------------------------------------------------------------------------------------------------------------------------------------------------------------------------------------------------------------------------------------------------------------------------------------------------------------------------------------------------------------------------------------------------------------------------------------------------------------------------------------------------------------------------------------------------------------------------------|
| 330 | <p>1js0A<br/>(124)</p> <hr/> <p>2nuiA<br/>(124)</p> | C | 99.19 | <p>TM-align: aliSize=114 (resi) RMSD=1.06 (Å)<br/> KETA<del>AA</del>KFEROHMDSSTSAASSSN<del>Y</del>CN<del>Q</del>MMKSRNLT<del>K</del>DRCKPVNTFVHESLADVOAVCSQKNVACKNGOTNCYOSYSTMSITDCRE<del>T</del>GSSKYPNCAYKTTQANKHIIVACE<del>G</del>NP<del>Y</del>vpvhfdasv-----<br/> KETA<del>AA</del>KFEROHMDSSTSAASSSN<del>Y</del>CN<del>Q</del>MMKSRNLT<del>K</del>DRCKPVNTFVHESLADVOAVCSQKNVACKNGOTNCYOSYSTMSITDCRE<del>T</del>GSSKYPNCAYKTTQANKHIIVACE<del>G</del>NP<del>Y</del>vpvhfdasv-----yvpvhfdasv</p> <p>SARST: aliSize=122 (resi) RMSD=6.25 (Å)<br/> k-<del>E</del>TAAAKFEROHMDSSTSAASSSN<del>Y</del>CN<del>Q</del>MMKSRNLT<del>K</del>DRCKPVNTFVHESLADVOAVCSQKNVACKNGOTNCYOSYSTMSITDCRE<del>T</del>GSSKYPNCAYKTTQANKHIIVACE<del>G</del>NP<del>Y</del>VPVHFDAS<del>V</del>-v<br/> -k<del>E</del>TAAAKFEROHMDSSTSAASSSN<del>Y</del>CN<del>Q</del>MMKSRNLT<del>K</del>DRCKPVNTFVHESLADVOAVCSQKNVACKNGOTNCYOSYSTMSITDCRE<del>T</del>GSSKYPNCAYKTTQANKHIIVACE<del>G</del>NP<del>Y</del>VPVHFDAS<del>V</del>-v-</p> <p>BLAST: aliSize=123 (resi) iden=99.19% (123/124) simi=99.19% (123/124)<br/> KETA<del>AA</del>KFEROHMDSSTSAASSSN<del>Y</del>CN<del>Q</del>MMKSRNLT<del>K</del>DRCKPVNTFVHESLADVOAVCSQKNVACKNGOTNCYOSYSTMSITDCRE<del>T</del>GSSKYPNCAYKTTQANKHIIVACE<del>G</del>NP<del>Y</del>VPVHFDAS<del>V</del><br/> KETA<del>AA</del>KFEROHMDSSTSAASSSN<del>Y</del>CN<del>Q</del>MMKSRNLT<del>K</del>DRCKPVNTFVHESLADVOAVCSQKNVACKNGOTNCYOSYSTMSITDCRE<del>T</del>GSSKYPNCAYKTTQANKHIIVACE<del>G</del>NP<del>Y</del>VPVHFDAS<del>V</del></p> <p>Proposed: aliSize=124 (resi) RMSD=0.59 (Å)<br/> KETA<del>AA</del>KFEROHMDSSTSAASSSN<del>Y</del>CN<del>Q</del>MMKSRNLT<del>K</del>DRCKPVNTFVHESLADVOAVCSQKNVACKNGOTNCYOSYSTMSITDCRE<del>T</del>GSSKYPNCAYKTTQANKHIIVACE<del>G</del>NP<del>Y</del>VPVHFDAS<del>V</del><br/> KETA<del>AA</del>KFEROHMDSSTSAASSSN<del>Y</del>CN<del>Q</del>MMKSRNLT<del>K</del>DRCKPVNTFVHESLADVOAVCSQKNVACKNGOTNCYOSYSTMSITDCRE<del>T</del>GSSKYPNCAYKTTQANKHIIVACE<del>G</del>NP<del>Y</del>VPVHFDAS<del>V</del></p>                                                                                                                                                                                                                                                                                                                                                                                                                                                                                                                                                                                                                                                   |
| 331 | <p>1js0A<br/>(124)</p> <hr/> <p>2op2A<br/>(124)</p> | C | 98.39 | <p>TM-align: aliSize=114 (resi) RMSD=1.21 (Å)<br/> KETA<del>AA</del>KFEROHMDSSTSAASSSN<del>Y</del>CN<del>Q</del>MMKSRNLT<del>K</del>DRCKPVNTFVHESLADVOAVCSQKNVACKNGOTNCYOSYSTMSITDCRE<del>T</del>GSSKYPNCAYKTTQANKHIIVACE<del>G</del>NP<del>Y</del>vpvhfdasv-----<br/> KETA<del>AA</del>KFEROHMDSSTSAASSSN<del>Y</del>CN<del>Q</del>MMKSRNLT<del>K</del>DRCKPVNTFVHESLADVOAVCSQKNVACKNGOTNCYOSYSTMSITDCRE<del>T</del>GSSKYPNCAYKTTQANKHIIVACE<del>G</del>NP<del>Y</del>vpvhfdasv-----yvpvhfdasv</p> <p>SARST: aliSize=122 (resi) RMSD=6.21 (Å)<br/> k-<del>E</del>TAAAKFEROHMDSSTSAASSSN<del>Y</del>CN<del>Q</del>MMKSRNLT<del>K</del>DRCKPVNTFVHESLADVOAVCSQKNVACKNGOTNCYOSYSTMSITDCRE<del>T</del>GSSKYPNCAYKTTQANKHIIVACE<del>G</del>NP<del>Y</del>VPVHFDAS<del>V</del>-v<br/> -k<del>E</del>TAAAKFEROHMDSSTSAASSSN<del>Y</del>CN<del>Q</del>MMKSRNLT<del>K</del>DRCKPVNTFVHESLADVOAVCSQKNVACKNGOTNCYOSYSTMSITDCRE<del>T</del>GSSKYPNCAYKTTQANKHIIVACE<del>G</del>NP<del>Y</del>VPVHFDAS<del>V</del>-v-</p> <p>BLAST: aliSize=122 (resi) iden=98.39% (122/124) simi=98.39% (122/124)<br/> KETA<del>AA</del>KFEROHMDSSTSAASSSN<del>Y</del>CN<del>Q</del>MMKSRNLT<del>K</del>DRCKPVNTFVHESLADVOAVCSQKNVACKNGOTNCYOSYSTMSITDCRE<del>T</del>GSSKYPNCAYKTTQANKHIIVACE<del>G</del>NP<del>Y</del>VPVHFDAS<del>V</del><br/> KETA<del>AA</del>KFEROHMDSSTSAASSSN<del>Y</del>CN<del>Q</del>MMKSRNLT<del>K</del>DRCKPVNTFVHESLADVOAVCSQKNVACKNGOTNCYOSYSTMSITDCRE<del>T</del>GSSKYPNCAYKTTQANKHIIVACE<del>G</del>NP<del>Y</del>VPVHFDAS<del>V</del></p> <p>Proposed: aliSize=124 (resi) RMSD=0.79 (Å)<br/> KETA<del>AA</del>KFEROHMDSSTSAASSSN<del>Y</del>CN<del>Q</del>MMKSRNLT<del>K</del>DRCKPVNTFVHESLADVOAVCSQKNVACKNGOTNCYOSYSTMSITDCRE<del>T</del>GSSKYPNCAYKTTQANKHIIVACE<del>G</del>NP<del>Y</del>VPVHFDAS<del>V</del><br/> KETA<del>AA</del>KFEROHMDSSTSAASSSN<del>Y</del>CN<del>Q</del>MMKSRNLT<del>K</del>DRCKPVNTFVHESLADVOAVCSQKNVACKNGOTNCYOSYSTMSITDCRE<del>T</del>GSSKYPNCAYKTTQANKHIIVACE<del>G</del>NP<del>Y</del>VPVHFDAS<del>V</del></p>                                                                                                                                                                                                                                                                                                                                                                                                                                                                                                                                                                                                                                                   |
| 332 | <p>1js0A<br/>(124)</p> <hr/> <p>2q4gX<br/>(126)</p> | C | 69.35 | <p>TM-align: aliSize=114 (resi) RMSD=1.50 (Å)<br/> k<del>E</del>TAAAKFEROHMDSSTSAASSSN<del>Y</del>CN<del>Q</del>MMKSRNLT<del>K</del>DRCKPVNTFVHESLADVOAVCSQKNVACKNGOTNCYOSYSTMSITDCRE<del>T</del>GSSKYPNCAYKTTQANKHIIVACE<del>G</del>NP<del>Y</del>vpvhfdasv-----<br/> -<del>S</del>RRAK<del>K</del>FQROHMDS<del>D</del>SS<del>S</del>SS<del>S</del>TYC<del>N</del>Q<del>M</del>RR<del>R</del>MT<del>Q</del>GRCKPVNTFVHE<del>P</del>LV<del>D</del>VQ<del>N</del>VC<del>F</del>JE<del>K</del>VTCKNGG<del>G</del>NCYK<del>S</del>NS<del>S</del>MHI<del>T</del>DCRL<del>I</del>NGSRYPNCAYRTSPKERHIIVACE<del>G</del>SP<del>Y</del>vpvhfdasveds-----vpvhfdasveds</p> <p>SARST: aliSize=121 (resi) RMSD=6.30 (Å)<br/> ke-<del>T</del>AAAKFEROHMDSSTSAASSSN<del>Y</del>CN<del>Q</del>MMKSRNLT<del>K</del>DRCKPVNTFVHESLADVOAVCSQKNVACKNGOTNCYOSYSTMSITDCRE<del>T</del>GSSKYPNCAYKTTQANKHIIVACE<del>G</del>NP<del>Y</del>VPVHFDAS<del>V</del>----v<br/> --e<del>S</del>RRAK<del>K</del>FQROHMDS<del>D</del>SS<del>S</del>SS<del>S</del>TYC<del>N</del>Q<del>M</del>RR<del>R</del>MT<del>Q</del>GRCKPVNTFVHE<del>P</del>LV<del>D</del>VQ<del>N</del>VC<del>F</del>JE<del>K</del>VTCKNGG<del>G</del>NCYK<del>S</del>NS<del>S</del>MHI<del>T</del>DCRL<del>I</del>NGSRYPNCAYRTSPKERHIIVACE<del>G</del>SP<del>Y</del>VPVHFDAS<del>V</del>veds-</p> <p>BLAST: aliSize=101 (resi) iden=69.35% (86/124) simi=81.45% (101/124)<br/> k<del>E</del>TAAAKFEROHMDSSTSAASSSN<del>Y</del>CN<del>Q</del>MMKSRNLT<del>K</del>DRCKPVNTFVHESLADVOAVCSQKNVACKNGOTNCYOSYSTMSITDCRE<del>T</del>GSSKYPNCAYKTTQANKHIIVACE<del>G</del>NP<del>Y</del>VPVHFDAS<del>V</del>---<br/> -<del>S</del>RRAK<del>K</del>FQROHMDS<del>D</del>SS<del>S</del>SS<del>S</del>TYC<del>N</del>Q<del>M</del>RR<del>R</del>MT<del>Q</del>GRCKPVNTFVHE<del>P</del>LV<del>D</del>VQ<del>N</del>VC<del>F</del>JE<del>K</del>VTCKNGG<del>G</del>NCYK<del>S</del>NS<del>S</del>MHI<del>T</del>DCRL<del>I</del>NGSRYPNCAYRTSPKERHIIVACE<del>G</del>SP<del>Y</del>VPVHFDAS<del>V</del>eds</p> <p>Proposed: aliSize=123 (resi) RMSD=0.84 (Å)<br/> k<del>E</del>TAAAKFEROHMDSSTSAASSSN<del>Y</del>CN<del>Q</del>MMKSRNLT<del>K</del>DRCKPVNTFVHESLADVOAVCSQKNVACKNGOTNCYOSYSTMSITDCRE<del>T</del>GSSKYPNCAYKTTQANKHIIVACE<del>G</del>NP<del>Y</del>VPVHFDAS<del>V</del>---<br/> -<del>S</del>RRAK<del>K</del>FQROHMDS<del>D</del>SS<del>S</del>SS<del>S</del>TYC<del>N</del>Q<del>M</del>RR<del>R</del>MT<del>Q</del>GRCKPVNTFVHE<del>P</del>LV<del>D</del>VQ<del>N</del>VC<del>F</del>JE<del>K</del>VTCKNGG<del>G</del>NCYK<del>S</del>NS<del>S</del>MHI<del>T</del>DCRL<del>I</del>NGSRYPNCAYRTSPKERHIIVACE<del>G</del>SP<del>Y</del>VPVHFDAS<del>V</del>eds</p> |

|     |                |   |       |                                                                                                                                                                                                                                                                                                                                                                                                                                                                                                                                                                                                                                                                                                                                                                                                                                                                                                                                                                                                                                                                                                                                                                                                                                                                                                                            |
|-----|----------------|---|-------|----------------------------------------------------------------------------------------------------------------------------------------------------------------------------------------------------------------------------------------------------------------------------------------------------------------------------------------------------------------------------------------------------------------------------------------------------------------------------------------------------------------------------------------------------------------------------------------------------------------------------------------------------------------------------------------------------------------------------------------------------------------------------------------------------------------------------------------------------------------------------------------------------------------------------------------------------------------------------------------------------------------------------------------------------------------------------------------------------------------------------------------------------------------------------------------------------------------------------------------------------------------------------------------------------------------------------|
| 333 | 1js0A<br>(124) | C | 99.19 | <p>TM-align: aliSize=114 (resi) RMSD=1.07 (Å)</p> <p>KETAAAKFERQHMDSSSTAASSSNYCQMMKSRNLTKDRCKPVNTFVHESLADVOAVCSQKNVACKNGOTNCYQSYSTMSITDCRETGSSKYPNCAYKTTQANKHIIVACEGNFyvpvhfdasv-----<br/> KETAAAKFERQHMDSSSTAASSSNYCQMMKSRNLTKDRCKPVNTFAHESLADVOAVCSQKNVACKNGOTNCYQSYSTMSITDCRETGSSKYPNCAYKTTQANKHIIVACEGNP-----yvpvhfdasv</p> <p>SARST: aliSize=122 (resi) RMSD=6.23 (Å)</p> <p>k-ETAAAKFERQHMDSSSTAASSSNYCQMMKSRNLTKDRCKPVNTFVHESLADVOAVCSQKNVACKNGOTNCYQSYSTMSITDCRETGSSKYPNCAYKTTQANKHIIVACEGNPYVPVHFDAV-v<br/> -k-ETAAAKFERQHMDSSSTAASSSNYCQMMKSRNLTKDRCKPVNTFAHESLADVOAVCSQKNVACKNGOTNCYQSYSTMSITDCRETGSSKYPNCAYKTTQANKHIIVACEGNPYVPVHFDAVv-</p> <p>BLAST: aliSize=123 (resi) iden=99.19% (123/124) simi=99.19% (123/124)</p> <p>KETAAAKFERQHMDSSSTAASSSNYCQMMKSRNLTKDRCKPVNTFVHESLADVOAVCSQKNVACKNGOTNCYQSYSTMSITDCRETGSSKYPNCAYKTTQANKHIIVACEGNPYVPVHFDAV<br/> KETAAAKFERQHMDSSSTAASSSNYCQMMKSRNLTKDRCKPVNTFAHESLADVOAVCSQKNVACKNGOTNCYQSYSTMSITDCRETGSSKYPNCAYKTTQANKHIIVACEGNPYVPVHFDAV</p> <p>Proposed: aliSize=124 (resi) RMSD=0.62 (Å)</p> <p>KETAAAKFERQHMDSSSTAASSSNYCQMMKSRNLTKDRCKPVNTFVHESLADVOAVCSQKNVACKNGOTNCYQSYSTMSITDCRETGSSKYPNCAYKTTQANKHIIVACEGNPYVPVHFDAV<br/> KETAAAKFERQHMDSSSTAASSSNYCQMMKSRNLTKDRCKPVNTFAHESLADVOAVCSQKNVACKNGOTNCYQSYSTMSITDCRETGSSKYPNCAYKTTQANKHIIVACEGNPYVPVHFDAV</p> |
|     | 3dh6A<br>(124) |   |       |                                                                                                                                                                                                                                                                                                                                                                                                                                                                                                                                                                                                                                                                                                                                                                                                                                                                                                                                                                                                                                                                                                                                                                                                                                                                                                                            |
| 334 | 1js0A<br>(124) | C | 99.19 | <p>TM-align: aliSize=114 (resi) RMSD=1.11 (Å)</p> <p>KETAAAKFERQHMDSSSTAASSSNYCQMMKSRNLTKDRCKPVNTFVHESLADVOAVCSQKNVACKNGOTNCYQSYSTMSITDCRETGSSKYPNCAYKTTQANKHIIVACEGNFyvpvhfdasv-----<br/> KETAAAKFERQHMDSSSTAASSSNYCQMMKSRNLTKDRCKPVNTFVHESLADVOAVCSQKNVACKNGOTNCYQSYSTMSITDCRETGSSKYPNCAYKTTQANKHIIVACEGNP-----yvpvhfdasv</p> <p>SARST: aliSize=122 (resi) RMSD=6.25 (Å)</p> <p>k-ETAAAKFERQHMDSSSTAASSSNYCQMMKSRNLTKDRCKPVNTFVHESLADVOAVCSQKNVACKNGOTNCYQSYSTMSITDCRETGSSKYPNCAYKTTQANKHIIVACEGNPYVPVHFDAV-v<br/> -k-ETAAAKFERQHMDSSSTAASSSNYCQMMKSRNLTKDRCKPVNTFVHESLADVOAVCSQKNVACKNGOTNCYQSYSTMSITDCRETGSSKYPNCAYKTTQANKHIIVACEGNPYVPVHFDAVv-</p> <p>BLAST: aliSize=123 (resi) iden=99.19% (123/124) simi=99.19% (123/124)</p> <p>KETAAAKFERQHMDSSSTAASSSNYCQMMKSRNLTKDRCKPVNTFVHESLADVOAVCSQKNVACKNGOTNCYQSYSTMSITDCRETGSSKYPNCAYKTTQANKHIIVACEGNPYVPVHFDAV<br/> KETAAAKFERQHMDSSSTAASSSNYCQMMKSRNLTKDRCKPVNTFVHESLADVOAVCSQKNVACKNGOTNCYQSYSTMSITDCRETGSSKYPNCAYKTTQANKHIIVACEGNPYVPVHFDAV</p> <p>Proposed: aliSize=124 (resi) RMSD=0.64 (Å)</p> <p>KETAAAKFERQHMDSSSTAASSSNYCQMMKSRNLTKDRCKPVNTFVHESLADVOAVCSQKNVACKNGOTNCYQSYSTMSITDCRETGSSKYPNCAYKTTQANKHIIVACEGNPYVPVHFDAV<br/> KETAAAKFERQHMDSSSTAASSSNYCQMMKSRNLTKDRCKPVNTFVHESLADVOAVCSQKNVACKNGOTNCYQSYSTMSITDCRETGSSKYPNCAYKTTQANKHIIVACEGNPYVPVHFDAV</p> |
|     | 3di7A<br>(124) |   |       |                                                                                                                                                                                                                                                                                                                                                                                                                                                                                                                                                                                                                                                                                                                                                                                                                                                                                                                                                                                                                                                                                                                                                                                                                                                                                                                            |
| 335 | 1js0A<br>(124) | C | 99.19 | <p>TM-align: aliSize=115 (resi) RMSD=1.38 (Å)</p> <p>KETAAAKFERQHMDSSSTAASSSNYCQMMKSRNLTKDRCKPVNTFVHESLADVOAVCSQKNVACKNGOTNCYQSYSTMSITDCRETGSSKYPNCAYKTTQANKHIIVACEGNFyvpvhfdasv-----<br/> KETAAAKFERQHMDSSSTAASSSNYCQMMKSRNLTKDRCKPVNTFVHESLADVOAACQKNVACKNGOTNCYQSYSTMSITDCRETGSSKYPNCAYKTTQANKHIIVACEGNPY-----vpvhfdasv</p> <p>SARST: aliSize=122 (resi) RMSD=6.25 (Å)</p> <p>k-ETAAAKFERQHMDSSSTAASSSNYCQMMKSRNLTKDRCKPVNTFVHESLADVOAVCSQKNVACKNGOTNCYQSYSTMSITDCRETGSSKYPNCAYKTTQANKHIIVACEGNPYVPVHFDAV-v<br/> -k-ETAAAKFERQHMDSSSTAASSSNYCQMMKSRNLTKDRCKPVNTFVHESLADVOAACQKNVACKNGOTNCYQSYSTMSITDCRETGSSKYPNCAYKTTQANKHIIVACEGNPYVPVHFDAVv-</p> <p>BLAST: aliSize=123 (resi) iden=99.19% (123/124) simi=99.19% (123/124)</p> <p>KETAAAKFERQHMDSSSTAASSSNYCQMMKSRNLTKDRCKPVNTFVHESLADVOAVCSQKNVACKNGOTNCYQSYSTMSITDCRETGSSKYPNCAYKTTQANKHIIVACEGNPYVPVHFDAV<br/> KETAAAKFERQHMDSSSTAASSSNYCQMMKSRNLTKDRCKPVNTFVHESLADVOAACQKNVACKNGOTNCYQSYSTMSITDCRETGSSKYPNCAYKTTQANKHIIVACEGNPYVPVHFDAV</p> <p>Proposed: aliSize=124 (resi) RMSD=0.59 (Å)</p> <p>KETAAAKFERQHMDSSSTAASSSNYCQMMKSRNLTKDRCKPVNTFVHESLADVOAVCSQKNVACKNGOTNCYQSYSTMSITDCRETGSSKYPNCAYKTTQANKHIIVACEGNPYVPVHFDAV<br/> KETAAAKFERQHMDSSSTAASSSNYCQMMKSRNLTKDRCKPVNTFVHESLADVOAACQKNVACKNGOTNCYQSYSTMSITDCRETGSSKYPNCAYKTTQANKHIIVACEGNPYVPVHFDAV</p>     |
|     | 3di8A<br>(124) |   |       |                                                                                                                                                                                                                                                                                                                                                                                                                                                                                                                                                                                                                                                                                                                                                                                                                                                                                                                                                                                                                                                                                                                                                                                                                                                                                                                            |



|     |                |   |       |                                                                                                                                                                                                                                                                                                                                                                                                                                                                                                                                                                                                                                                                                                                                                                                                                                                                                                                                                                                                                                                                                                                                                                                                                                                                                                                                                      |
|-----|----------------|---|-------|------------------------------------------------------------------------------------------------------------------------------------------------------------------------------------------------------------------------------------------------------------------------------------------------------------------------------------------------------------------------------------------------------------------------------------------------------------------------------------------------------------------------------------------------------------------------------------------------------------------------------------------------------------------------------------------------------------------------------------------------------------------------------------------------------------------------------------------------------------------------------------------------------------------------------------------------------------------------------------------------------------------------------------------------------------------------------------------------------------------------------------------------------------------------------------------------------------------------------------------------------------------------------------------------------------------------------------------------------|
| 336 | 1js0A<br>(124) | C | 99.19 | <p><b>TM-align: aliSize=114 (resi) RMSD=1.13 (Å)</b><br/>KETAAAKFERQHMDSSSTSAASSSNYNQMMKSRNLTKDRCKPVNTFVHESLADVOAVCSQKNVACKNGOTNCYQSYSTMSITDCRETGSSKYPNCAYKTTQANKHIIVACEGNFyvpvhfdasv-----<br/>KETAAAKFERQHMDSSSTSAASSSNYNQMMKSRNLTKDRCKPVNTFVHESLADVOAVCSQKNVACKNGOTNCYQSYSTMSITDCRETGSSKYPNCAYKTTQANKHIIVACEGNF-----yvpvhfdasv</p> <p><b>SARST: aliSize=121 (resi) RMSD=5.50 (Å)</b><br/>k-ETAAAKFERQHMDSSSTSAASSSNYNQMMKSRNLTKDRCKPVNTFVHESLADVOAVCSQKNVACKNGOTNCYQSYSTMSITDCRETGSSKYPNCAYKTTQANKHIIVACEGNPYVPVHFDAS--sv<br/>-kETAAAKFERQHMDSSSTSAASSSNYNQMMKSRNLTKDRCKPVNTFVHESLADVOAVCSQKNVACKNGOTNCYQSYSTMSITDCRETGSSKYPNCAYKTTQANKHIIVACEGNPYVPVHFDASv--</p> <p><b>BLAST: aliSize=123 (resi) iden=99.19% (123/124) simi=99.19% (123/124)</b><br/>KETAAAKFERQHMDSSSTSAASSSNYNQMMKSRNLTKDRCKPVNTFVHESLADVOAVCSQKNVACKNGOTNCYQSYSTMSITDCRETGSSKYPNCAYKTTQANKHIIVACEGNPYVPVHFDASV<br/>KETAAAKFERQHMDSSSTSAASSSNYNQMMKSRNLTKDRCKPVNTFVHESLADVOAVCSQKNVACKNGOTNCYQSYSTMSITDCRETGSSKYPNCAYKTTQANKHIIVACEGNPYVPVHFDASV</p> <p><b>Proposed: aliSize=124 (resi) RMSD=0.71 (Å)</b><br/>KETAAAKFERQHMDSSSTSAASSSNYNQMMKSRNLTKDRCKPVNTFVHESLADVOAVCSQKNVACKNGOTNCYQSYSTMSITDCRETGSSKYPNCAYKTTQANKHIIVACEGNPYVPVHFDASV<br/>KETAAAKFERQHMDSSSTSAASSSNYNQMMKSRNLTKDRCKPVNTFVHESLADVOAVCSQKNVACKNGOTNCYQSYSTMSITDCRETGSSKYPNCAYKTTQANKHIIVACEGNPYVPVHFDASV</p> |
| 337 | 1js0A<br>(124) | C | 99.19 | <p><b>TM-align: aliSize=115 (resi) RMSD=1.40 (Å)</b><br/>KETAAAKFERQHMDSSSTSAASSSNYNQMMKSRNLTKDRCKPVNTFVHESLADVOAVCSQKNVACKNGOTNCYQSYSTMSITDCRETGSSKYPNCAYKTTQANKHIIVACEGNPYvpvhfdasv-----<br/>KETAAAKFERQHMDSSSTSAASSSNYNQMMKSRNLTKDRCKPVNTFVHESLADVOAVCSQKNVACKNGOTNCYQSYSTMSITDCRETGSSKYPNCAYKTTQANKHIIVACEGNPY-----vpvhfdasv</p> <p><b>SARST: aliSize=121 (resi) RMSD=6.28 (Å)</b><br/>ke--TAAAKFERQHMDSSSTSAASSSNYNQMMKSRNLTKDRCKPVNTFVHESLADVOAVCSQKNVACKNGOTNCYQSYSTMSITDCRETGSSKYPNCAYKTTQANKHIIVACEGNPYVPVHFDAS--v<br/>--keTAAAKFERQHMDSSSTSAASSSNYNQMMKSRNLTKDRCKPVNTFVHESLADVOAVCSQKNVACKNGOTNCYQSYSTMSITDCRETGSSKYPNCAYKTTQANKHIIVACEGNPYVPVHFDASv-</p> <p><b>BLAST: aliSize=123 (resi) iden=99.19% (123/124) simi=99.19% (123/124)</b><br/>KETAAAKFERQHMDSSSTSAASSSNYNQMMKSRNLTKDRCKPVNTFVHESLADVOAVCSQKNVACKNGOTNCYQSYSTMSITDCRETGSSKYPNCAYKTTQANKHIIVACEGNPYVPVHFDASV<br/>KETAAAKFERQHMDSSSTSAASSSNYNQMMKSRNLTKDRCKPVNTFVHESLADVOAVCSQKNVACKNGOTNCYQSYSTMSITDCRETGSSKYPNCAYKTTQANKHIIVACEGNPYVPVHFDASV</p> <p><b>Proposed: aliSize=124 (resi) RMSD=0.63 (Å)</b><br/>KETAAAKFERQHMDSSSTSAASSSNYNQMMKSRNLTKDRCKPVNTFVHESLADVOAVCSQKNVACKNGOTNCYQSYSTMSITDCRETGSSKYPNCAYKTTQANKHIIVACEGNPYVPVHFDASV<br/>KETAAAKFERQHMDSSSTSAASSSNYNQMMKSRNLTKDRCKPVNTFVHESLADVOAVCSQKNVACKNGOTNCYQSYSTMSITDCRETGSSKYPNCAYKTTQANKHIIVACEGNPYVPVHFDASV</p> |
| 338 | 1js0A<br>(124) | C | 99.19 | <p><b>TM-align: aliSize=114 (resi) RMSD=1.08 (Å)</b><br/>KETAAAKFERQHMDSSSTSAASSSNYNQMMKSRNLTKDRCKPVNTFVHESLADVOAVCSQKNVACKNGOTNCYQSYSTMSITDCRETGSSKYPNCAYKTTQANKHIIVACEGNFyvpvhfdasv-----<br/>KETAAAKFERQHMDSSSTSAASSSNYNQMMKSRNLTKDRCKPVNTFVHESLADVOAVCSQKNVACKNGOTNCYQSYSTMSITDCRETGSSKYPNCAYKTTQANKHIIVACEGNF-----yvpvhfdasv</p> <p><b>SARST: aliSize=122 (resi) RMSD=6.23 (Å)</b><br/>k-ETAAAKFERQHMDSSSTSAASSSNYNQMMKSRNLTKDRCKPVNTFVHESLADVOAVCSQKNVACKNGOTNCYQSYSTMSITDCRETGSSKYPNCAYKTTQANKHIIVACEGNPYVPVHFDAS--v<br/>-kETAAAKFERQHMDSSSTSAASSSNYNQMMKSRNLTKDRCKPVNTFVHESLADVOAVCSQKNVACKNGOTNCYQSYSTMSITDCRETGSSKYPNCAYKTTQANKHIIVACEGNPYVPVHFDASv-</p> <p><b>BLAST: aliSize=123 (resi) iden=99.19% (123/124) simi=99.19% (123/124)</b><br/>KETAAAKFERQHMDSSSTSAASSSNYNQMMKSRNLTKDRCKPVNTFVHESLADVOAVCSQKNVACKNGOTNCYQSYSTMSITDCRETGSSKYPNCAYKTTQANKHIIVACEGNPYVPVHFDASV<br/>KETAAAKFERQHMDSSSTSAASSSNYNQMMKSRNLTKDRCKPVNTFVHESLADVOAVCSQKNVACKNGOTNCYQSYSTMSITDCRETGSSKYPNCAYKTTQANKHIIVACEGNPYVPVHFDASV</p> <p><b>Proposed: aliSize=124 (resi) RMSD=0.61 (Å)</b><br/>KETAAAKFERQHMDSSSTSAASSSNYNQMMKSRNLTKDRCKPVNTFVHESLADVOAVCSQKNVACKNGOTNCYQSYSTMSITDCRETGSSKYPNCAYKTTQANKHIIVACEGNPYVPVHFDASV<br/>KETAAAKFERQHMDSSSTSAASSSNYNQMMKSRNLTKDRCKPVNTFVHESLADVOAVCSQKNVACKNGOTNCYQSYSTMSITDCRETGSSKYPNCAYKTTQANKHIIVACEGNPYVPVHFDASV</p>   |

|     |                                                     |   |       |                                                                                                                                                                                                                                                                                                                                                                                                                                                                                                                                                                                                                                                                                                                                                                                                                                                                                                                                                                                                                                                                                                                                                                                                                                                                                                                                                                                                                                                                                                                                                                                                                                                                                                                                                                                                                                                                                            |
|-----|-----------------------------------------------------|---|-------|--------------------------------------------------------------------------------------------------------------------------------------------------------------------------------------------------------------------------------------------------------------------------------------------------------------------------------------------------------------------------------------------------------------------------------------------------------------------------------------------------------------------------------------------------------------------------------------------------------------------------------------------------------------------------------------------------------------------------------------------------------------------------------------------------------------------------------------------------------------------------------------------------------------------------------------------------------------------------------------------------------------------------------------------------------------------------------------------------------------------------------------------------------------------------------------------------------------------------------------------------------------------------------------------------------------------------------------------------------------------------------------------------------------------------------------------------------------------------------------------------------------------------------------------------------------------------------------------------------------------------------------------------------------------------------------------------------------------------------------------------------------------------------------------------------------------------------------------------------------------------------------------|
| 339 | <p>1js0A<br/>(124)</p> <hr/> <p>3rsdA<br/>(124)</p> | C | 99.19 | <p>TM-align: aliSize=114 (resi) RMSD=1.08 (Å)<br/> KETA AAKFERQHMDSSSTAAASSSNYCNO MMKSRNLTKDRCKPVNTFVHESLADVOAVCSQKNVACKNGOTNCYOSYSTMSITDCRETGSSKYPNCAYKTTQANKHIIVACEG N P Y p v h f d a s v -----<br/> KETA AAKFERQHMDSSSTAAASSSNYCNO MMKSRNLTKDRCKPVNTFVHESLADVOAVCSQKNVACKNGOTNCYOSYSTMSITDCRETGSSKYPNCAYKTTQANKHIIVACEG N P Y -----y p v h f n a s v</p> <p>SARST: aliSize=122 (resi) RMSD=6.24 (Å)<br/> k-ETAAAKFERQHMDSSSTAAASSSNYCNO MMKSRNLTKDRCKPVNTFVHESLADVOAVCSQKNVACKNGOTNCYOSYSTMSITDCRETGSSKYPNCAYKTTQANKHIIVACEG N P Y P V P V H F D A S -v<br/> -kETAAAKFERQHMDSSSTAAASSSNYCNO MMKSRNLTKDRCKPVNTFVHESLADVOAVCSQKNVACKNGOTNCYOSYSTMSITDCRETGSSKYPNCAYKTTQANKHIIVACEG N P Y P V P V H F N A S v-</p> <p>BLAST: aliSize=124 (resi) iden=99.19% (123/124) simi=100.00% (124/124)<br/> KETA AAKFERQHMDSSSTAAASSSNYCNO MMKSRNLTKDRCKPVNTFVHESLADVOAVCSQKNVACKNGOTNCYOSYSTMSITDCRETGSSKYPNCAYKTTQANKHIIVACEG N P Y P V P V H F D A S V<br/> KETA AAKFERQHMDSSSTAAASSSNYCNO MMKSRNLTKDRCKPVNTFVHESLADVOAVCSQKNVACKNGOTNCYOSYSTMSITDCRETGSSKYPNCAYKTTQANKHIIVACEG N P Y P V P V H F N A S V</p> <p>Proposed: aliSize=124 (resi) RMSD=0.62 (Å)<br/> KETA AAKFERQHMDSSSTAAASSSNYCNO MMKSRNLTKDRCKPVNTFVHESLADVOAVCSQKNVACKNGOTNCYOSYSTMSITDCRETGSSKYPNCAYKTTQANKHIIVACEG N P Y P V P V H F D A S V<br/> KETA AAKFERQHMDSSSTAAASSSNYCNO MMKSRNLTKDRCKPVNTFVHESLADVOAVCSQKNVACKNGOTNCYOSYSTMSITDCRETGSSKYPNCAYKTTQANKHIIVACEG N P Y P V P V H F N A S V</p>                                                                                                                                                                                                                                                                                                                                                                                                                            |
| 340 | <p>1js0A<br/>(124)</p> <hr/> <p>3rskA<br/>(124)</p> | C | 97.58 | <p>TM-align: aliSize=115 (resi) RMSD=1.34 (Å)<br/> KETA AAKFERQHMDSSSTAAASSSNYCNO MMKSRNLTKDRCKPVNTFVHESLADVOAVCSQKNVACKNGOTNCYOSYSTMSITDCRETGSSKYPNCAYKTTQANKHIIVACEG N P Y p v h f d a s v -----<br/> KETA A A F E A Q H M D S S T A A A S S S N Y C N O M M K S R N L T K D R C K P V N T F V H E S L A D V O A V C S Q K N V A C A N G O T N C Y O S Y S T M S I T D C R E T G S S K Y P N C A Y K T T Q A N K H I I V A C E G N P Y -----v p v h f d a s v</p> <p>SARST: aliSize=122 (resi) RMSD=6.22 (Å)<br/> k-ETAAAKFERQHMDSSSTAAASSSNYCNO MMKSRNLTKDRCKPVNTFVHESLADVOAVCSQKNVACKNGOTNCYOSYSTMSITDCRETGSSKYPNCAYKTTQANKHIIVACEG N P Y P V P V H F D A S -v<br/> -kETAA A F E A Q H M D S S T A A A S S S N Y C N O M M K S R N L T K D R C K P V N T F V H E S L A D V O A V C S Q K N V A C A N G O T N C Y O S Y S T M S I T D C R E T G S S K Y P N C A Y K T T Q A N K H I I V A C E G N P Y P V P V H F D A S v-</p> <p>BLAST: aliSize=121 (resi) iden=97.58% (121/124) simi=97.58% (121/124)<br/> KETA AAKFERQHMDSSSTAAASSSNYCNO MMKSRNLTKDRCKPVNTFVHESLADVOAVCSQKNVACKNGOTNCYOSYSTMSITDCRETGSSKYPNCAYKTTQANKHIIVACEG N P Y P V P V H F D A S V<br/> KETA A A F E A Q H M D S S T A A A S S S N Y C N O M M K S R N L T K D R C K P V N T F V H E S L A D V O A V C S Q K N V A C A N G O T N C Y O S Y S T M S I T D C R E T G S S K Y P N C A Y K T T Q A N K H I I V A C E G N P Y P V P V H F D A S V</p> <p>Proposed: aliSize=124 (resi) RMSD=0.53 (Å)<br/> KETA AAKFERQHMDSSSTAAASSSNYCNO MMKSRNLTKDRCKPVNTFVHESLADVOAVCSQKNVACKNGOTNCYOSYSTMSITDCRETGSSKYPNCAYKTTQANKHIIVACEG N P Y P V P V H F D A S V<br/> KETA A A F E A Q H M D S S T A A A S S S N Y C N O M M K S R N L T K D R C K P V N T F V H E S L A D V O A V C S Q K N V A C A N G O T N C Y O S Y S T M S I T D C R E T G S S K Y P N C A Y K T T Q A N K H I I V A C E G N P Y P V P V H F D A S V</p> |
| 341 | <p>1js0A<br/>(124)</p> <hr/> <p>3rspA<br/>(124)</p> | C | 99.19 | <p>TM-align: aliSize=115 (resi) RMSD=1.41 (Å)<br/> KETA AAKFERQHMDSSSTAAASSSNYCNO MMKSRNLTKDRCKPVNTFVHESLADVOAVCSQKNVACKNGOTNCYOSYSTMSITDCRETGSSKYPNCAYKTTQANKHIIVACEG N P Y p v h f d a s v -----<br/> KETA AAKFERQHMDSSSTAAASSSNYCNO MMKSRNLTKDRCKPVNTFVHESLADVOAVCSQKNVACKNGOTNCYOSYSTMSITDCRETGSSKYPNCAYKTTQANKHIIVACEG N P Y -----v p v h f d a s v</p> <p>SARST: aliSize=122 (resi) RMSD=6.23 (Å)<br/> k-ETAAAKFERQHMDSSSTAAASSSNYCNO MMKSRNLTKDRCKPVNTFVHESLADVOAVCSQKNVACKNGOTNCYOSYSTMSITDCRETGSSKYPNCAYKTTQANKHIIVACEG N P Y P V P V H F D A S -v<br/> -kETAAAKFERQHMDSSSTAAASSSNYCNO MMKSRNLTKDRCKPVNTFVHESLADVOAVCSQKNVACKNGOTNCYOSYSTMSITDCRETGSSKYPNCAYKTTQANKHIIVACEG N P Y P V P V H F D A S v-</p> <p>BLAST: aliSize=123 (resi) iden=99.19% (123/124) simi=99.19% (123/124)<br/> KETA AAKFERQHMDSSSTAAASSSNYCNO MMKSRNLTKDRCKPVNTFVHESLADVOAVCSQKNVACKNGOTNCYOSYSTMSITDCRETGSSKYPNCAYKTTQANKHIIVACEG N P Y P V P V H F D A S V<br/> KETA AAKFERQHMDSSSTAAASSSNYCNO MMKSRNLTKDRCKPVNTFVHESLADVOAVCSQKNVACKNGOTNCYOSYSTMSITDCRETGSSKYPNCAYKTTQANKHIIVACEG N P Y P V P V H F D A S V</p> <p>Proposed: aliSize=124 (resi) RMSD=0.69 (Å)<br/> KETA AAKFERQHMDSSSTAAASSSNYCNO MMKSRNLTKDRCKPVNTFVHESLADVOAVCSQKNVACKNGOTNCYOSYSTMSITDCRETGSSKYPNCAYKTTQANKHIIVACEG N P Y P V P V H F D A S V<br/> KETA AAKFERQHMDSSSTAAASSSNYCNO MMKSRNLTKDRCKPVNTFVHESLADVOAVCSQKNVACKNGOTNCYOSYSTMSITDCRETGSSKYPNCAYKTTQANKHIIVACEG N P Y P V P V H F D A S V</p>                                                                                                                                                                                                                                                                                                                                                                                                                             |

|     |                                               |   |                                                                                                                                                                                                                                                                                                                                                                                                                                                                                                                                                                                                                                                                                                                                                                                                                                                                                                                                                                                                                                                                                                                                                                                                                                                                                                                                                                                                                                                                                                                                                                                                                                                                                                                                                                                                                                                                                   |
|-----|-----------------------------------------------|---|-----------------------------------------------------------------------------------------------------------------------------------------------------------------------------------------------------------------------------------------------------------------------------------------------------------------------------------------------------------------------------------------------------------------------------------------------------------------------------------------------------------------------------------------------------------------------------------------------------------------------------------------------------------------------------------------------------------------------------------------------------------------------------------------------------------------------------------------------------------------------------------------------------------------------------------------------------------------------------------------------------------------------------------------------------------------------------------------------------------------------------------------------------------------------------------------------------------------------------------------------------------------------------------------------------------------------------------------------------------------------------------------------------------------------------------------------------------------------------------------------------------------------------------------------------------------------------------------------------------------------------------------------------------------------------------------------------------------------------------------------------------------------------------------------------------------------------------------------------------------------------------|
| 342 | <p>1js0A<br/>(124)</p> <p>4rsdA<br/>(124)</p> | C | <p>99.19</p> <p><b>TM-align:</b> aliSize=115 (resi) RMSD=1.41 (Å)<br/> KETAAAKFERQHMDSSSTAASSSNYCNOQMMKSRNLTKDRCKPVNTFVHESLADVOAVCSQKNVACKNGOTNCYQSYSTMSITDCRETGSSKYPNCAYKTTQANKHIIVACEGNPYvpvhfdasv-----<br/> KETAAAKFERQHMDSSSTAASSSNYCNOQMMKSRNLTKDRCKPVNTFVHESLADVOAVCSQKNVACKNGOTNCYQSYSTMSITDCRETGSSKYPNCAYKTTQANKHIIVACEGNPY-----vpvhfaasv</p> <p><b>SARST:</b> aliSize=122 (resi) RMSD=6.24 (Å)<br/> k-ETAAAKFERQHMDSSSTAASSSNYCNOQMMKSRNLTKDRCKPVNTFVHESLADVOAVCSQKNVACKNGOTNCYQSYSTMSITDCRETGSSKYPNCAYKTTQANKHIIVACEGNPYVPVHEDAS-v<br/> -kETAAAKFERQHMDSSSTAASSSNYCNOQMMKSRNLTKDRCKPVNTFVHESLADVOAVCSQKNVACKNGOTNCYQSYSTMSITDCRETGSSKYPNCAYKTTQANKHIIVACEGNPYVPVHEDASv-</p> <p><b>BLAST:</b> aliSize=123 (resi) iden=99.19% (123/124) simi=99.19% (123/124)<br/> KETAAAKFERQHMDSSSTAASSSNYCNOQMMKSRNLTKDRCKPVNTFVHESLADVOAVCSQKNVACKNGOTNCYQSYSTMSITDCRETGSSKYPNCAYKTTQANKHIIVACEGNPYVPVHEDASV<br/> KETAAAKFERQHMDSSSTAASSSNYCNOQMMKSRNLTKDRCKPVNTFVHESLADVOAVCSQKNVACKNGOTNCYQSYSTMSITDCRETGSSKYPNCAYKTTQANKHIIVACEGNPYVPVHEDASV</p> <p><b>Proposed:</b> aliSize=124 (resi) RMSD=0.72 (Å)<br/> KETAAAKFERQHMDSSSTAASSSNYCNOQMMKSRNLTKDRCKPVNTFVHESLADVOAVCSQKNVACKNGOTNCYQSYSTMSITDCRETGSSKYPNCAYKTTQANKHIIVACEGNPYVPVHEDASV<br/> KETAAAKFERQHMDSSSTAASSSNYCNOQMMKSRNLTKDRCKPVNTFVHESLADVOAVCSQKNVACKNGOTNCYQSYSTMSITDCRETGSSKYPNCAYKTTQANKHIIVACEGNPYVPVHEDASV</p>                                                                                                                                                                                                                                                                                                                                                                                                                                                                                                    |
| 343 | <p>1lgqA<br/>(112)</p> <p>1qu5A<br/>(182)</p> | C | <p>19.64</p> <p><b>TM-align:</b> aliSize=74 (resi) RMSD=2.63 (Å)<br/> -----MOPWGRILRIGaeg---EPHVLLR--KREWTIGRRRGDLSEFPsNKLVSGDHCRIVVDeKS-----GOVTLEDISTSGTVINKL-----L-----KVVkqTcplqtgdviylvyrkne<br/> eaetreqllhsntenvksskkkgNGRFLTKPDPD---siiQESLEIQqgVNPFFIGRSEDNCKIE-DNRLSRVIGCFIFKK-RHavgksmyespaqgDDIWyCHIGTNSYLNnrmigtkfllqdgDeikiidkknkfvigfveindttglfneglmlQE---Q-----</p> <p>pehnavaylesl-----<br/> -----rvvlkqtaeekdlvkl</p> <p><b>SARST:</b> aliSize=100 (resi) RMSD=15.61 (Å)<br/> mqpwgr-----LRLGA---EEGEPHVLLRKRWTIGRRRGDLSEFPsNKLVSGDHCRIVVDeKS-----LISGDHCRIVVDEKsGOVTLEDISTSGTVINKLVVKKOTCPLOTGIVYLVYRknePEHNAVAYLYES-----<br/> -----eaetreqllhsntenvksskkkgngfrfTLKPLpdsiiQESLEIQqgVNPFFIGRSEDNCKIE-DNRLSRVIGCFIFKKRHAAGKSMYSPAQGL-DDIWyCHIGTNSYLNnrmigtkfllqdgDeikiidkknkfvigfveindttglfneglmlqeqrsvlkqtaeekdlvk</p> <p>--1s<br/> kl--</p> <p><b>BLAST:</b> aliSize=39 (resi) iden=21.43% (24/112) simi=34.82% (39/112)<br/> mqpwgrllrlgaegephvllrkrewt-----IGRRRGDLSEFPsNKLVSGDHCRIVVDeKS-----LISGDHCRIVVDEKsGOVTLEDISTSGTVINKLVVKKOTCPLOTGIVYLVYRknePEHNAVAYLYES-----<br/> -----eaetreqllhsntenvksskkkgngfrfTLKPLpdsiiQESLEIQqgVNPFFIGRSEDNCKIE-DNRLSRVIGCFIFKKRHAAGKSMYSPAQGL-DDIWyCHIGTNSYLNnrmigtkfllqdgDeikiidkknkfvigfveindttglfneglml</p> <p>-----epehnavaylesl<br/> qeqrsvlkqtaeekdlvkl-----</p> <p><b>Proposed:</b> aliSize=104 (resi) RMSD=1.87 (Å)<br/> -----MOPWGRILRIGaeg---AeegpHVLLR--KREWTIGRRRGDLSEFPsNKLVSGDHCRIVVDeKS-----GOVTLEDISTSGTVINKLVVKKOTCPLOTGIVYLVYRknePEHNAVAYLYES-----<br/> eaetreqllhsntenvksskkkgNGRFLTKPDPD---siiQESLEIQqgVNPFFIGRSEDNCKIE-DNRLSRVIGCFIFKK-RHavgksmyespaqgDDIWyCHIGTNSYLNnrmigtkfllqdgDeikiidkknkfvigfveindttglfneglmlqeqrsvlkqtaeekdlvkl</p>                                                                                                                                                             |
| 344 | <p>1lr5A<br/>(160)</p> <p>1dgwA<br/>(178)</p> | C | <p>10.63</p> <p><b>TM-align:</b> aliSize=127 (resi) RMSD=3.04 (Å)<br/> scvrd--SLVRDIsOMPOSSYGIeGLSHITVAGAlNHG-----MKEVEWLOTISPGORTPIHRHSCEEVFTVlKKGTLMGSSsSLkypgaPOEIPFFNTTFSIPVNDPHOVWNSDEHEDLOVVIISR---PPAKIILYDDwsmhta-----AVLkfnf-----<br/> -----nPYLFRS-NKFLTLFKNOHGSLRLLQRFNedTEklenLRDYRLEYCSKNTLLLP--HSDSDLLVLEGAQIIVLVN-PD---RDTYKLDGDAIKQAGTFYLIIPDNNQNRIRKFAITfrrpGTVEDFLLSS-----tkrlpSYL---safsknfl easyds pydeieqtllq</p> <p>----Vwdedcfeak-----<br/> eeqG-----vivkmp</p> <p><b>SARST:</b> aliSize=127 (resi) RMSD=5.55 (Å)<br/> scvrdnsL---VRDISOMP--QSSYGIeGLSHITVA--GALNHGMKEVEWLOTISPGORTPIHRHSCEEVFTVlKKGTLMGSSsSLkypgaPOEIPFFNTTFSIPVNDPHOVWNSDEHEDLOVVIISR---SRPPAKIILYDDwSMPHAAVL-----<br/> -----nnpYLFRSNKFLTLFKNOHGSLRLLQRFNedTEklenLRDYRLEYCSKNTLLLP--HSDSDLLVLEGAQIIVLVNPDG---RDTYKLDGDAIKQAGTFYLIIPDNNQNRIRKFAITfrrpGTVEDFLLSS-----LSSTKRLPSYLSafsknfl easyds pydeieqtllqeeqg</p> <p>-----kpfvwdedcfeak<br/> vivkmp-----</p> <p><b>BLAST:</b> aliSize=11 (resi) iden=5.62% (9/160) simi=6.88% (11/160)<br/> scvrdnslvrdisqmpqssygieglshitvagalnmgmkevevwlqtispgqrtpihrsceevftvlkgkgtllmgssslkypgaqoeipffnttfsipvnd-----PHqvwNSdehEDLOVVI-----<br/> -----nnpylfrsnkfltlfknqhgslrlqrfnedteklenlrdyrvleycskntlllp--HSDSDLLVLEGAQIIVLVNPDG---RDTYKLDGDAIKQAGTFYLIIPDNNQNRIRKFAITfrrpGTVEDFLLSS-----LSSTKRLPSYLSafsknfl easyds pydeieqtllqeeqg</p> <p>-----isrppakiilyddwsmhtaavlkpfvwdedcfeak</p> <p><b>Proposed:</b> aliSize=140 (resi) RMSD=2.32 (Å)<br/> scvrdn--SLVRDIsOMPOS-sYGIeGLSHITVaGAlNH-G-----MKEVEWLOTISPGORTPIHRHSCEEVFTVlKKGTLMGSSsSLkypgaPOEIPFFNTTFSIPVNDPHOVWNSDEHEDLOVVIISR---PPAKIILYDDwSMPHAAVL-----<br/> -----nnpYLFRS-NKFLTLFKNOHGSLRLL-QR--FnEdteklenLRDYRLEYCSKNTLLLP--HSDSDLLVLEGAQIIVLVN-PD---RDTYKLDGDAIKQAGTFYLIIPDNNQNRIRKFAITfrrpGTVEDFLLSS-----LSSTKRLPSYLSafsknfl easyds pydeieqtllqeeqg</p> <p>EDcFEaak<br/> IV-KM--P</p> |

|     |             |   |      |                                                                                                                                                                                                                                                                                                                                                                                                                                                                                                                                                                                                                                                                                                                                                                                                                                                                                                                                                                                                                                                                                                                                                                                                 |
|-----|-------------|---|------|-------------------------------------------------------------------------------------------------------------------------------------------------------------------------------------------------------------------------------------------------------------------------------------------------------------------------------------------------------------------------------------------------------------------------------------------------------------------------------------------------------------------------------------------------------------------------------------------------------------------------------------------------------------------------------------------------------------------------------------------------------------------------------------------------------------------------------------------------------------------------------------------------------------------------------------------------------------------------------------------------------------------------------------------------------------------------------------------------------------------------------------------------------------------------------------------------|
| 345 | 1lr5A (160) | N | 8.13 | <p><b>TM-align:</b> aliSize=103 (resi) RMSD=2.76 (Å)<br/> scvrdnslvrdisqmpqssygieglshltvagaln<del>hgm-----</del>-----KEVEVWLOTISPGORTPIHRH---SCEEVFTVLKIKGTLIMGSS---SLKYPGqPOEIPFFQ--NTTFSIPVNDPQOVWNSDeHEDLOVLVISRPPA--KIFLYD--<br/> -----mmiviktaipdvliilepkvfgdergffesynqqtfeeli<del>grkvtfvQDNHsksknVLRGLFQRgenAQQKLVRCaVLEVFDVAVDIrkEPTFGQWGVNLSaenKRQLWIEGFAIGFVTLSE</del>---YAEFLYKATNYYSPSEGSILW</p> <p>W-S-----MPHTAAVlkfpvwdedcfeak--<br/> NDeAigiewpfsqplpelsakdaaapLDQL-----te</p> <p><b>SARST:</b> aliSize=100 (resi) RMSD=5.31 (Å)<br/> scvrdnslvrdisqmpqssygieglshltvagaln<del>gmkev-----</del>-----EVWLOTISPGORTPIHRHSC---EEVFTVLKIKGTLIMGSS--SLKYPGqPOEIPFF--ONTTFSIPVNDPQOVWNSDehedLOVLVISRPPA---IFL<br/> -----mmiviktaipdvliilepkvfgdergffesynqqtfeeli<del>grkvtfvQDNHsksknVLRGLFQRGenagKLVRCaVLEVFDVAVDIrkESPTFGQWGVNLSaenKRQLWIEGFAIGFVTLSE</del>---YAEFLYKATNYYSPSEGS</p> <p>YdN SMPHTAAVlkfpvwdedcfeak<br/> I-LNDEAIGIEWpfsqplpelsakdaaaplldqalte-----</p>                                                                                                                                                                                                               |
|     | 1dzaA (183) |   |      | <p><b>BLAST:</b> aliSize=17 (resi) iden=5.00% (8/160) simi=10.62% (17/160)<br/> scvrdnslvrdisqmpqssygieglshltvagaln<del>gmkev-----</del>-----EVWLOTISPGORTPIHRHSC---EEVFTVLKIKGTLIMGSS--SLKYPGqPOEIPFF--ONTTFSIPVNDPQOVWNSDehedLOVLVISRPPA---IFL<br/> -----mmiviktaipdvliilepkvfgdergffesynqqtfeeli<del>grkvtfvQDNHsksknVLRGLFQRGenagKLVRCaVLEVFDVAVDIrkESPTFGQWGVNLSaenKRQLWIEGFAIGFVTLSE</del>---YAEFLYKATNYYSPSEGS</p> <p>-----FNTTFSIPVNDPQOVWNSDehedLOVLVISRPPA-----iflyddwsmphaaVlkfpvwdedcfeak<br/> wgvnlsaenkrqlwipiegfhgfvltseyaeFlYKATNYYSPSEGSILW--DEAIGIEWPFSQPLPESLWdaaaplldqalte-----</p> <p><b>Proposed:</b> aliSize=129 (resi) RMSD=2.39 (Å)<br/> SCVRD-<del>---nSLVRDISQMPQSSYGIIE---GLSHIT---vaGALNHGMKE--</del>EVWLOTISPGORTPIHRH---SCEEVFTVLKIKGTLIMGSS---LkyPGqPOEIPFFQ--NTTFSIPVNDPQOVWNSDeHEDLOVLVISRPPA--KIFLYD--DW-S-----MP<br/> MMIVIKtai-PD-VLI--LEPKV-F-GdergFFESynqqt--FEELI<del>GRKvtfvQDNHsksknVLRGLFQRgenAQQKLVRCaVLEVFDVAVDIrkEPTFGQWGVNLSaenKRQLWIEGFAIGFVTLSE</del>---YAEFLYKATNYYSPSEGSILWDeAigiewpfsqplpelsakdaaaplLD<br/> htAAV--lkfpvwdedcfeak<br/> --QLlte-----</p>                                                                                     |
| 346 | 1lr5A (160) | N | 8.13 | <p><b>TM-align:</b> aliSize=102 (resi) RMSD=2.75 (Å)<br/> scvrdnslvrdisqmpqssygieglshltvagaln<del>hgm-----</del>-----EVEVWLOTISPGORTPIHRH---SCEEVFTVLKIKGTLIMGSS---SLKYPGqPOEIPFFQ--NTTFSIPVNDPQOVWNSDehedLOVLVISRPPA--KIFLYD--<br/> -----efriktsldgaiiepevytderygymetfneai<del>fqenglevrfVQDNESMSVRVLRGLFQRekPQGKLVRIKGEIFDVAVDLrknDITYGE-WTGVRlSDenRREIEGFAIGFLALSD</del>---DECI-NYKCTELYHpeYDSGIPW</p> <p>W-S-----MPHTAAVlkfpvwdedcfeak--<br/> DpDigidwplemvddliisekdrnwklRENpyl-----yl</p> <p><b>SARST:</b> aliSize=107 (resi) RMSD=9.60 (Å)<br/> scvrdnslvrdisqm-----POSSYgiEGLSHITVAGALN---HGMKEV---EVWLOTISPGORTPIHRH---CEEVFTVLKIKGTLIMGSSSLKYPGqPOEIPFFQ--NTTFSIPVNDPQOVWNSDehedLOVLVISRPPA--KIFLYD--DW-S-----MP<br/> -----efriktsldgaiiepevyTDER-----YFMEtFNEAI<del>fqenglevrfVQDNESMSVRVLRGLFQRekPQGKLVRIKGEIFDVAVDLrknDITYGE-WTGVRlSDenRREIEGFAIGFLALSD</del>---ECIVNYKCTELYHpeYDSGIPWddpDigidwplemvddliise</p> <p>-----iflyddwsmphaaVlkfpvwdedcfeak<br/> kdrnwklrenpyl-----</p>                                                                                                                                                                                                    |
|     | 1ep0A (183) |   |      | <p><b>BLAST:</b> aliSize=5 (resi) iden=2.50% (4/160) simi=3.12% (5/160)<br/> scvrdnslvrdisqmpqssygieglshltvagaln<del>hgmkev-----</del>-----EVWLOTISPGORTPIHRHSC---EEVFTVLKIKGTLIMGSS--SLKYPGqPOEIPFFQ--NTTFSIPVNDPQOVWNSDehedLOVLVISRPPA--KIFLYD--DW-S-----MP<br/> -----efriktsldgaiiepevyTDER-----YFMEtFNEAI<del>fqenglevrfVQDNESMSVRVLRGLFQRekPQGKLVRIKGEIFDVAVDLrknDITYGE-WTGVRlSDenRREIEGFAIGFLALSD</del>---ECIVNYKCTELYHpeYDSGIPWddpDigidwplemvddliise</p> <p>-----iflyddwsmphaaVlkfpvwdedcfeak<br/> dtygeWtVrlSDenrreffipeghflalsdecivnykctelyhpeYDSGIPWddpDigidwplemvddliisekdrnwklrenpyl-----</p> <p><b>Proposed:</b> aliSize=128 (resi) RMSD=2.30 (Å)<br/> scvrdns-----LVRDisqMPOSS-ygiEGLSHITVAGALNHG---MKEVEVWLOTISPGORTPIHRH---SCEEVFTVLKIKGTLIMGSS---LkyPGqPOEIPFFQ--NTTFSIPVNDPQOVWNSDehedLOVLVISRPPA--KIFLYD--DW-S-----MP<br/> --EFRFIktsldgaIIIE--PEVYtD---RGYFMEtFNEAI<del>fqenglevrfVQDNESMSVRVLRGLFQRekPQGKLVRIKGEIFDVAVDLrknDITYGE-WTGVRlSDenRREIEGFAIGFLALSD</del>---DECI-NYKCTELYHpeYDSGIPWddpDigidwplemvddliisekdrnwklRENpyl</p> <p>HT--aavlkfpvwdedcfeak<br/> enPvyll-----</p>                                                                                          |
| 347 | 1lr5A (160) | N | 4.38 | <p><b>TM-align:</b> aliSize=102 (resi) RMSD=2.68 (Å)<br/> scvrdnslvrdisqmpqssygieglshltvagaln<del>hgm-----</del>-----KEVEVWLOTISPGORTPIHRHSCEEVFTVLKIKGTLIMGSS-S-SLKYPGqPOEIPFFQNTTFSIPVNDPQOVWNSDeHEDLOVLVISRPPA---KIFLYD--<br/> -----nffgkllaarpveaipgmlefdipvhgdnrgwfkenfqkekmlpl<del>gfpsffaeGKLNQNVSFsrkNVLRLGIAEPWDKYSISADgKVLGTWVDIReGETFGN-TYQTVI DASKSIFVIRGVANGFQVLSDFVAYSylLVNDYWalElkpk</del>YAfvnyadsLdikwenleaeavseadenhpflkdvkplrkedi</p> <p>-----SM-PHTAAVlkfpvwdedcfeak-----<br/> kYAfvnyadsLdikwenleaeavseadenhpflkdvkplrkedi-----</p> <p><b>SARST:</b> aliSize=105 (resi) RMSD=9.92 (Å)<br/> scvrdnslvrdisqmpqssyglshltvagaln-----A-NHGM-----KEVEVWLOTISPGORTPIHRHSC---EEVFTVLKIKGTLIMGSS--SLKYPGqPOEIPFFONTTFSIPVNDPQOVWNSDehedLOVLVISRPPA--KIFLYD--DW-S-----MP<br/> -----nffgkllaarpveaipgmlefdipvhgdnrgwfkenfqkekMLPLGfPESffaeGKLNQNVSFsrkNVLRLGIAEPWDKYSISADgKVLGTWVDIReGETFGN-TYQTVI DASKSIFVIRGVANGFQVLSDFVAYSylLVNDYWalElkpkYAfvnyadsLdikwenleaeavseadenhpflkdvkplrkedi</p> <p>-----iflyddwsmphaaVlkfpvwdedcfeak<br/> nleaeavseadenhpflkdvkplrkedi-----</p>                                                                                                           |
|     | 1nxmA (194) |   |      | <p><b>BLAST:</b> aliSize=6 (resi) iden=3.12% (5/160) simi=3.75% (6/160)<br/> scvrdnslvrdisqmpqssygieglshltvagaln<del>hgmkev-----</del>-----EVWLOTISPGORTPIHRHSC---EEVFTVLKIKGTLIMGSS-S-SLKYPGqPOEIPFFONTTFSIPVNDPQOVWNSDehedLOVLVISRPPA--KIFLYD--DW-S-----MP<br/> -----nffgkllaarpveaipgmlefdipvhgdnrgwfkenfqkekMLPLGfPESffaeGKLNQNVSFsrkNVLRLGIAEPWDKYSISADgKVLGTWVDIReGETFGN-TYQTVI DASKSIFVIRGVANGFQVLSDFVAYSylLVNDYWalElkpkYAfvnyadsLdikwenleaeavseadenhpflkdvkplrkedi</p> <p>-----FNTTFSIPVNDPQOVWNSDehedLOVLVISRPPA-----iflyddwsmphaaVlkfpvwdedcfeak<br/> etfgntYqTVIDASKSIFVIRGVANGFQVLSDFVAYSylLVNDYWalElkpkYAfvnyadsLdikwenleaeavseadenhpflkdvkplrkedi-----</p> <p><b>Proposed:</b> aliSize=129 (resi) RMSD=2.45 (Å)<br/> SCVRDNS-----LVRDISQMPQSSYGIIE---GLSHIT---vaGALNHGMKE--<del>-----</del>EVWLOTISPGORTPIHRHSC---EEVFTVLKIKGTLIMGSS-S-SLKYPGqPOEIPFFONTTFSIPVNDPQOVWNSDehedLOVLVISRPPA--KIFLYD--DW-S-----MP<br/> nffgkllaarpveaipgmlefdipvhgdnrgwfkenfqkekMLPLGfPESffaeGKLNQNVSFsrkNVLRLGIAEPWDKYSISADgKVLGTWVDIRegETFGN-TYQTVI DASKSIFVIRGVANGFQVLSDFVAYSylLVNDYWalElkpkYAfvnyadsLdikwenleaeavseadenhpflkdvkplrkedi</p> <p>HT--aavlkfpvwdedcfeak<br/> nhpflkdvkplrkedi-----</p> |

|     |                                |   |                                                                                                                                                                                                                                                                                                                                                                                                                                                                                                                                                                                                                                                                                                                                                                                                                                                                                                                                                                                                                                                                                                                                                                                                                                                                                                                                                                                                                                                                                                                                                                                                                                                                                                                                                                                                                                                                                                                                                                                                                                                                                                                               |
|-----|--------------------------------|---|-------------------------------------------------------------------------------------------------------------------------------------------------------------------------------------------------------------------------------------------------------------------------------------------------------------------------------------------------------------------------------------------------------------------------------------------------------------------------------------------------------------------------------------------------------------------------------------------------------------------------------------------------------------------------------------------------------------------------------------------------------------------------------------------------------------------------------------------------------------------------------------------------------------------------------------------------------------------------------------------------------------------------------------------------------------------------------------------------------------------------------------------------------------------------------------------------------------------------------------------------------------------------------------------------------------------------------------------------------------------------------------------------------------------------------------------------------------------------------------------------------------------------------------------------------------------------------------------------------------------------------------------------------------------------------------------------------------------------------------------------------------------------------------------------------------------------------------------------------------------------------------------------------------------------------------------------------------------------------------------------------------------------------------------------------------------------------------------------------------------------------|
| 348 | 1lr5A (160)<br><br>1wa4A (205) | N | <p>9.38</p> <p><b>TM-align:</b> aliSize=103 (resi) RMSD=2.73 (Å)<br/> scvrdnslvrdisqmpqssygieglshltvagaln<hgm>-----KEVEVWLOTISPGORTPIHRH---SCEEVFTVLKKGTLMGSSSLKY--PGPOEIPFF--NTTFSIPVNDPQOVWNSDeHEDLQVLVITSRPPA--KIFLYD---<br/> -----mqarklavdgaieftprvfaddrglilipyqea<b>fveahggplfrvaQT</b>IHSMSKRGVVRGIIYTVtppGTAKYVYCARGKAMDIVIDIRVGSptfGQWDSVLMdqPRAVYLPVGVGAFVA-L-EDITVFSYMASRSYVtqDELALsal</hgm></p> <p>-----D-DWSPMH--TAAVlkfpfvwdedcfeak-----<br/> dpalglpidigvepivsdrrvAiTLAEARqGGL-----pdyttsqeierrltavpvst</p> <p><b>SARST:</b> aliSize=122 (resi) RMSD=10.37 (Å)<br/> scvrdnslvrdisq-----MPOSSYIegLSHITVAGALN---HG---MKEVEVWLOTISPGORTPIHRHS---CEEVFTVLKKGTLMGSSSLKY--GPOEIPFF--ONTTFSIPVNDPQOVWNSdehEDLQVLVITSRPPAK---IFLYDWSMHTAAV-----<br/> -----mqarklavdgaieftprVFADDR-----LLLPYQEEA<b>fveahggplfrvaQT</b>IHSMSKRGVVRGIHYTVtppGTAKYVYCARGKAMDIVIDIRVGSptfGQWDSVLMdqPRAVYLPVGVGAFVAL---EDITVFSYMASRSYVtqDELAL-SALDIALGLpidigvepivsd</p> <p>-----lkfpfvwdedcfeak<br/> rdrvaitlaeaqrqglpdyttsqeierrltavpvst-----</p> <p><b>BLAST:</b> aliSize=7 (resi) iden=2.50% (4/160) simi=4.38% (7/160)<br/> scvrdnslvrdisqmpqs-----mqarklavdgaieftprvfaddrglilipyqea<b>fveahggplfrva</b>qt ihsmskrvgvrgihytvppgtakyvyargkamdividivrgsptfgqwsvlmdqqdpravylpvgvghafvaldedtvt<b>SyIEGLSHIT</b>-----<br/> -----vagaln<hgmke< hgm="">evwlqtispgqrtpihrsceevftvlkkgkgtllmgssslkyppgqpeipffqnttfsipvndphqvnsdehedlqvlviisrppakiflyddwsmhtaavlkfpfvwdedcfeak<br/> vaitlaeaqrqglpdyttsqeierrltavpvst-----</hgmke<></p> <p><b>Proposed:</b> aliSize=132 (resi) RMSD=2.43 (Å)<br/> scvrdnslvrdisqmpqssygieglshltvagaln<hgm>-----MK-E-VEVWLOTISPGORTPIHRH---SCEEVFTVLKKGTLMGSS-S--LkyPGqPOEIPFF--NTTFSIPVNDPQOVWNSDeHEDLQVLVITSRPPA--KIFLYD---W-----SMP-H<br/> -----MQARKlavdgaIEF--TPRVFA--DDRGLLLPYQEEA<b>fveahggplfrvaQT</b>IHSMSKRGVVRGIIYTVtppGTAKYVYCARGKAMDIVIDIRVGSptf--GQ-WDSVLMdqPRAVYLPVGVGAFVA-L-EDITVFSYMASRSYVtqDELALSalDpaLglpidigvepivsdrrvAITLAEa</hgm></p> <p>T-A-A-----vlfkfpfvwdedcfeak<br/> QrQgLLpdyttsqeierrltavpvst-----</p>                                                                                 |
| 349 | 1lr5A (160)<br><br>2ix1A (196) | N | <p>5.63</p> <p><b>TM-align:</b> aliSize=100 (resi) RMSD=2.50 (Å)<br/> scvrdnslvrdisqmpqssygieglshltvagaln<hgm>-----KEVEVWLOTISPGORTPIHRHSCCEEVFTVLK--GTLTLMGSS---SLkyPGqPOEIPFFONTTFSIPVNDPQOVWNSDeHEDLQVLVITSRPPA--KIFLYD---W-----SMP-H<br/> -----tenffgkllaarpveaipgmlefdipvhgdnrgwfenfqekm<b>lplgfpesffaeGKLQNNVSFSRKNVLRGLAEPWDKYISADGKVLGTWVD</b>lRegeTF--GN-TYQTVIDASKSIFVIRGVANGFOV-L-SDFVAYSYLVDYWAlel</hgm></p> <p>---IFLYD---W-----SMP-HTAAVlkfpfvwdedcfeak-----<br/> elkpkYAFVnyapsLdikwenleaevseadenhpFLKdVKPL-----rkedl</p> <p><b>SARST:</b> aliSize=102 (resi) RMSD=8.06 (Å)<br/> scvrdnslvrdisqmpqssygieglshltvagaln<hgm>-----LSHITVAG---ALN<hgm>-----KEVEVWLOTISPGORTPIHRHSCCEEVFTVLK--GTLTLMGSS--LKYPGqPOEIPFFONTTFSIPVNDPQOVWNSDehedLOVLVITSRPPAK-----<br/> -----tenffgkllaarpveaipgmlefdipvhgdnrgwfenfqekm<b>lplgfpesffaeGKLQNNVSFSRKNVLRGLAEPWDKYISADGKVLGTWVD</b>lRegeTF--GN-TYQTVIDASKSIFVIRGVANGFOVLSDFVAYSYLVDYWAlel</hgm></hgm></p> <p>-----iflyddwsmhtaavlkfpfvwdedcfeak<br/> dikwenleaevseadenhpflkdvkplrkedl-----</p> <p><b>BLAST:</b> aliSize=6 (resi) iden=3.12% (5/160) simi=3.75% (6/160)<br/> scvrdnslvrdisqmpqssygieglshltvagaln<hgmke< hgm="">evwlqtispgqrtpihrsceevftvlkkgkgtllmgssslkyppgqpeip-----ONTTFSIPVNDPQOVWNSDehedLOVLVITSRPPAK-----<br/> -----tenffgkllaarpveaipgmlefdipvhgdnrgwfenfqekm<b>lplgfpesffaeGKLQNNVSFSRKNVLRGLAEPWDKYISADGKVLGTWVD</b>lRegeTF--GN-TYQTVIDASKSIFVIRGVANGFOVLSDFVAYSYLVDYWAlel</hgmke<></p> <p>-----ndphqvnsdehedlqvlviisrppakiflyddwsmhtaavlkfpfvwdedcfeak<br/> egtfngtyqtvidasksvfprgvangfvlsdfvaysylvndywalelkpkYAFVnyapsLdikwenleaevseadenhpflkdvkplrkedl-----</p> <p><b>Proposed:</b> aliSize=131 (resi) RMSD=2.53 (Å)<br/> scvrdnslvrdisqmpqssygieglshltvagaln<hgm>-----MK-E-VEVWLOTISPGORTPIHRHSCCEEVFTVLK--GTLTLMGSS-S-LkyPGqPOEIPFFONTTFSIPVNDPQOVWNSDeHEDLQVLVITSRPPA--KIFLYD---W-----SMP-H<br/> -----tenffgkllaarpveaipgmlefdipvhgdnrgwfenfqekm<b>lplgfpesffaeGKLQNNVSFSRKNVLRGLAEPWDKYISADGKVLGTWVD</b>lRegeTF--GN-TYQTVIDASKSIFVIRGVANGFOVLSDFVAYSYLVDYWAlel</hgm></p> <p>---SMP-HT-----aavlkfpfvwdedcfeak<br/> nhpFLKdVKplrkedl-----</p> |
| 350 | 1lr5A (160)<br><br>2ix1B (195) | N | <p>5.63</p> <p><b>TM-align:</b> aliSize=102 (resi) RMSD=2.65 (Å)<br/> scvrdnslvrdisqmpqssygieglshltvagaln<hgm>-----KEVEVWLOTISPGORTPIHRHSCCEEVFTVLK--GTLTLMGSS-S-SLkyPGqPOEIPFFONTTFSIPVNDPQOVWNSDeHEDLQVLVITSRPPA--KIFLYD---W-----SMP-H<br/> -----enffgkllaarpveaipgmlefdipvhgdnrgwfenfqekm<b>lplgfpesffaeGKLQNNVSFSRKNVLRGLAEPWDKYISADGKVLGTWVD</b>lRegeTF--GN-TYQTVIDASKSIFVIRGVANGFOV-L-SDFVAYSYLVDYWAlel</hgm></p> <p>---IFLYD---W-----SMP-HTAAVlkfpfvwdedcfeak-----<br/> pkYAFVnyapsLdikwenleaevseadenhpFLKdVKPL-----rkedl</p> <p><b>SARST:</b> aliSize=101 (resi) RMSD=10.05 (Å)<br/> scvrdnslvrdisq-----POSSYIegLSHITVAG---ALN<hgm>-----KEVEVWLOTISPGORTPIHRHSCCEEVFTVLK--GTLTLMGSS-S-SLkyPGqPOEIPFFONTTFSIPVNDPQOVWNSDehedLOVLVITSRPPAK-----<br/> -----enffgkllaarpveaipgmlefdipvhgdnrgwfenfqekm<b>lplgfpesffaeGKLQNNVSFSRKNVLRGLAEPWDKYISADGKVLGTWVD</b>lRegeTF--GN-TYQTVIDASKSIFVIRGVANGFOVLSDFVAYSYLVDYWAlel</hgm></p> <p>-----iflyddwsmhtaavlkfpfvwdedcfeak<br/> dikwenleaevseadenhpflkdvkplrkedl-----</p> <p><b>BLAST:</b> aliSize=6 (resi) iden=3.12% (5/160) simi=3.75% (6/160)<br/> scvrdnslvrdisqmpqssygieglshltvagaln<hgmke< hgm="">evwlqtispgqrtpihrsceevftvlkkgkgtllmgssslkyppgqpeip-----ONTTFSIPVNDPQOVWNSDehedLOVLVITSRPPAK-----<br/> -----enffgkllaarpveaipgmlefdipvhgdnrgwfenfqekm<b>lplgfpesffaeGKLQNNVSFSRKNVLRGLAEPWDKYISADGKVLGTWVD</b>lRegeTF--GN-TYQTVIDASKSIFVIRGVANGFOVLSDFVAYSYLVDYWAlel</hgmke<></p> <p>-----ndphqvnsdehedlqvlviisrppakiflyddwsmhtaavlkfpfvwdedcfeak<br/> getfgntytvidasksvfprgvangfvlsdfvaysylvndywalelkpkYAFVnyapsLdikwenleaevseadenhpflkdvkplrkedl-----</p> <p><b>Proposed:</b> aliSize=132 (resi) RMSD=2.58 (Å)<br/> scvrdnslvrdisqmpqssygieglshltvagaln<hgm>-----MK-E-VEVWLOTISPGORTPIHRHSCCEEVFTVLK--GTLTLMGSS-S-SLkyPGqPOEIPFFONTTFSIPVNDPQOVWNSDeHEDLQVLVITSRPPA--KIFLYD---W-----SMP-H<br/> -----enffgkllaarpveaipgmlefdipvhgdnrgwfenfqekm<b>lplgfpesffaeGKLQNNVSFSRKNVLRGLAEPWDKYISADGKVLGTWVD</b>lRegeTF--GN-TYQTVIDASKSIFVIRGVANGFOVLSDFVAYSYLVDYWAlel</hgm></p> <p>---SMPHT-----aavlkfpfvwdedcfeak<br/> pFLKdVKplrkedl-----</p>                                |

|     |                |   |       |                                                                                                                                                                                                                                                                                                                                                                                                                                                                                                                                                                                                                                                                                                                                                                                                                                                                                                                                                                                                                                                                                                                                                                                                                                                                                                                                                                                                                                                                                                                                                                                                                                                                                                                                                                                                                                                                                                                                                                                   |
|-----|----------------|---|-------|-----------------------------------------------------------------------------------------------------------------------------------------------------------------------------------------------------------------------------------------------------------------------------------------------------------------------------------------------------------------------------------------------------------------------------------------------------------------------------------------------------------------------------------------------------------------------------------------------------------------------------------------------------------------------------------------------------------------------------------------------------------------------------------------------------------------------------------------------------------------------------------------------------------------------------------------------------------------------------------------------------------------------------------------------------------------------------------------------------------------------------------------------------------------------------------------------------------------------------------------------------------------------------------------------------------------------------------------------------------------------------------------------------------------------------------------------------------------------------------------------------------------------------------------------------------------------------------------------------------------------------------------------------------------------------------------------------------------------------------------------------------------------------------------------------------------------------------------------------------------------------------------------------------------------------------------------------------------------------------|
| 351 | 1lr5A<br>(160) | N | 3.75  | <p><b>TM-align:</b> aliSize=102 (resi) RMSD=2.66 (Å)<br/> scvrdnslvrdisqmpqssygieglshittvagaln<hgm-----kevevwlotispgortpirhscfevftv lk-kgtlmgss-s-slkypgqpoeipffonttfsipvndphovwnsdehedlqvlviisrppa--kiflyddwsmph-taavlkpfvwdedcfeak-----<="" p=""> <p>-----mtenfkgkllaarpveaipgmlefdipvhgdnrgwkenfqqekmlplgfpesffaeGKLQNNVFSRKNVLRGLAEPWDKYISADGKVLGTWVDLREGETfGNTYQTVIDASKSIFVIRGVANGFQVLSDFVAYSYLVDYDWleLkpkYAFVnyadpsldikwenleeaevseadenhpflkdvkplrkedl</p> <p><b>SARST:</b> aliSize=118 (resi) RMSD=9.88 (Å)<br/> scvrdnslvrdisq-----MPOSSYIEGLSHITVAG--ALN<hgmke-----vevwlotispgortpirhscfevftv lk-kgtlmgssslkyp--gpoeipffonttfsipvndphovwnsdehedlovlviisrppakiflyddwsmph-taavlkpfvwdedcfeak-----<="" p=""> <p>-----mtenfkgkllaarpveaipgmlefdipVHGDNR-----WFKENFQKEKMLPLGFPesffaeGKLQNNVFSRKNVLRGLAEPWDKYISADGKVLGTWVDLREGETfGNTYQTVIDASKSIFVIRGVANGFQVLSDFVAYSYLVDYDW-----ALEL-KPKYAFVnyadpsldikwenleeaevseadenhpflkdvkplrkedl</p> <p><b>BLAST:</b> aliSize=6 (resi) iden=3.12% (5/160) simi=3.75% (6/160)<br/> scvrdnslvrdisqmpqssygieglshittvagaln<hgmkevevwlqtsipgqprtphrshsceevftvlkkgkgtllmgssslkypgqpeip-----eonttfsipv-----< p=""> <p>-----mtenfkgkllaarpveaipgmlefdipvhgdnrgwkenfqqekmlplgfpesffaeGKLqnnvsvsrknvlrglhaepwdkyisvaggkvlgtwvdlndphqvnwshedhdqlvliisrppakiflyddwsmph-taavlkpfvwdedcfeak</p> <p><b>Proposed:</b> aliSize=132 (resi) RMSD=2.81 (Å)<br/> scvrdnslvrdisq-----LVRDisOMPOSSYIEGLSHITVAGALNHGMKEVEVWLOTISPGORTPIRHSCFEVFTV LK-KGTLMGSSSL--kypGqPOEIPFFON-TTFSIPVNDPHOVWNSDeHEDLQVLVIISRPPA--KIFLYddWsmPH-TAavlkpfvwdedcfeak-----</p> <p>-----mtenfkgkllaarpveaipgmlefdipVHGDNR-----WFKENFQKEKMLPLGFPesffaeGKLQNNVFSRKNVLRGLAEPWDKYISADGKVLGTWVDLREGETfGNTYQTVIDASKSIFVIRGVANGFQVLSDFVAYSYLVDYDWleLkpkYAFVnyadpsldikwenleeaevseadenhpflkdvkplrkedl</p> </hgmkevevwlqtsipgqprtphrshsceevftvlkkgkgtllmgssslkypgqpeip-----eonttfsipv-----<></p></hgmke-----vevwlotispgortpirhscfevftv></p></hgm-----kevevwlotispgortpirhscfevftv></p>             |
| 352 | 1lr5A<br>(160) | N | 11.94 | <p><b>TM-align:</b> aliSize=94 (resi) RMSD=2.64 (Å)<br/> scvrdnslvrdisqmpqssygieglshittvagaln<hgm-----kevevwlotispgortpirhscfevftv lk-kgtlmgssslkypgqpoeipffon-ttfsipvndphovwnsdehedlqvlviisrppa--kiflyddwsmph-taavlkpfvwdedcfeak-----<="" p=""> <p>-----enkvinfkkiidsrgslvaieenknipfSIKRVYIFdTKGEEPRGFHAkkLQVLCNGSCRVIDDGN-----I-IQETLDSPaVGLYVGPVAVWEMHDFSSDCVMMVLA--SDYYD-----ETDYIRQYDNFKKYIAKINL</p> <p><b>SARST:</b> aliSize=120 (resi) RMSD=13.33 (Å)<br/> scvrdnslvrdisqm-----POSYYIEGLSHITVAGALNHGMKEVEVWLOTISPGORTPIRHSCFEVFTV LK-KGTLMGSSSLkypGqPOEIPFFONTTFSIPVNDPHOVWNSDeHEDLQVLVIISRPPAKiflyddwsmphTAAVLKFPFVWDEDCFEAAK</p> <p>-----enkvinfkkiidsrgslvaieenknipfSIKRVYIFdTKGEEPRGFHAkkLQVLCNGSCRVIDDGN-----I-IQETLDSPaVGLYVGPVAVWEMHDFSSDCVMMVLA--SDYYD-----ETDYIRQYDNFKKYIAKINL</p> <p><b>BLAST:</b> aliSize=21 (resi) iden=9.70% (13/134) simi=15.67% (21/134)<br/> scvrdnslvrdisqmpqssygieglshittvagaln<hgmkevevwlqtsipgqprtphrshsceevftvlkkgkgtllmgssslkypgqpeip-----eonttfsipvndphovwnsdehedlqvlviisrppakiflyddwsmph-taavlkpfvwdedcfeak-----< p=""> <p>-----enkvinfkkiidsrgslvaieenknipfSIKRVYIFdTKGEEPRGFHAkkLQVLCNGSCRVIDDGN-----I-IQETLDSPaVGLYVGPVAVWEMHDFSSDCVMMVLA--SDYYD-----ETDYIRQYDNFKKYIAKINL</p> <p><b>Proposed:</b> aliSize=118 (resi) RMSD=2.38 (Å)<br/> scvrdnslvrdisqmpqssygieglshittvagaln<hgmkevevwlqtsipgqprtphrshsceevftvlkkgkgtllmgssslkypgqpeip-----eonttfsipvndphovwnsdehedlqvlviisrppa--kiflyddwsmph-taavlkpfvwdedcfeak-----< p=""> <p>-----enkvinfkkiidsrgslvaieenknipfSIKRVYIFdTKGEEPRGFHAkkLQVLCNGSCRVIDDGN-----I-IQETLDSPaVGLYVGPVAVWEMHDFSSDCVMMVLA--SDYYD-----ETDYIRQYDNFKKYIAKINL</p> </hgmkevevwlqtsipgqprtphrshsceevftvlkkgkgtllmgssslkypgqpeip-----eonttfsipvndphovwnsdehedlqvlviisrppa--kiflyddwsmph-taavlkpfvwdedcfeak-----<></p></hgmkevevwlqtsipgqprtphrshsceevftvlkkgkgtllmgssslkypgqpeip-----eonttfsipvndphovwnsdehedlqvlviisrppakiflyddwsmph-taavlkpfvwdedcfeak-----<></p></hgm-----kevevwlotispgortpirhscfevftv></p> |
| 353 | 1lr5A<br>(160) | C | 11.94 | <p><b>TM-align:</b> aliSize=94 (resi) RMSD=2.64 (Å)<br/> scvrdnslvrdisqmpqssygieglshittvagaln<hgm-----kevevwlotispgortpirhscfevftv lk-kgtlmgssslkypgqpoeipffon-ttfsipvndphovwnsdehedlqvlviisrppa--kiflyddwsmph-taavlkpfvwdedcfeak-----<="" p=""> <p>-----enkvinfkkiidsrgslvaieenknipfSIKRVYIFdTKGEEPRGFHAkkLQVLCNGSCRVIDDGN-----I-IQETLDSPaVGLYVGPVAVWEMHDFSSDCVMMVLA--SDYYD-----ETDYIRQYDNFKKYIAKINL</p> <p><b>SARST:</b> aliSize=120 (resi) RMSD=13.33 (Å)<br/> scvrdnslvrdisqm-----POSYYIEGLSHITVAGALNHGMKEVEVWLOTISPGORTPIRHSCFEVFTV LK-KGTLMGSSSLkypGqPOEIPFFONTTFSIPVNDPHOVWNSDeHEDLQVLVIISRPPAKiflyddwsmphTAAVLKFPFVWDEDCFEAAK</p> <p>-----enkvinfkkiidsrgslvaieenknipfSIKRVYIFdTKGEEPRGFHAkkLQVLCNGSCRVIDDGN-----I-IQETLDSPaVGLYVGPVAVWEMHDFSSDCVMMVLA--SDYYD-----ETDYIRQYDNFKKYIAKINL</p> <p><b>BLAST:</b> aliSize=21 (resi) iden=9.70% (13/134) simi=15.67% (21/134)<br/> scvrdnslvrdisqmpqssygieglshittvagaln<hgmkevevwlqtsipgqprtphrshsceevftvlkkgkgtllmgssslkypgqpeip-----eonttfsipvndphovwnsdehedlqvlviisrppakiflyddwsmph-taavlkpfvwdedcfeak-----< p=""> <p>-----enkvinfkkiidsrgslvaieenknipfSIKRVYIFdTKGEEPRGFHAkkLQVLCNGSCRVIDDGN-----I-IQETLDSPaVGLYVGPVAVWEMHDFSSDCVMMVLA--SDYYD-----ETDYIRQYDNFKKYIAKINL</p> <p><b>Proposed:</b> aliSize=94 (resi) RMSD=2.04 (Å)<br/> scvrdnslvrdisqmpqssygieglshittvagaln<hgmkevevwlqtsipgqprtphrshsceevftvlkkgkgtllmgssslkypgqpeip-----eonttfsipvndphovwnsdehedlqvlviisrppa--kiflyddwsmphtaavlkfpfvwdedcfeaak< p=""> <p>-----enkvinfkkiidsrgslvaieenknipfSIKRVYIFdTKGEEPRGFHAkkLQVLCNGSCRVIDDGN-----I-IQETLDSPaVGLYVGPVAVWEMHDFSSDCVMMVLA--SDYYD-----ETDYIRQYDNFKKYIAKINL</p> </hgmkevevwlqtsipgqprtphrshsceevftvlkkgkgtllmgssslkypgqpeip-----eonttfsipvndphovwnsdehedlqvlviisrppa--kiflyddwsmphtaavlkfpfvwdedcfeaak<></p></hgmkevevwlqtsipgqprtphrshsceevftvlkkgkgtllmgssslkypgqpeip-----eonttfsipvndphovwnsdehedlqvlviisrppakiflyddwsmph-taavlkpfvwdedcfeak-----<></p></hgm-----kevevwlotispgortpirhscfevftv></p>          |

|     |                |   |       |                                                                                                                                                                                                                                                                                                                                                                                                                                                                                                                                                                                                                                                                                                                                                                                                                                                                                                                                                                                                                                                                                                                                                                                                                                                                                                                                                                                                                                                                                                                                                                                                                                                                                                                                               |
|-----|----------------|---|-------|-----------------------------------------------------------------------------------------------------------------------------------------------------------------------------------------------------------------------------------------------------------------------------------------------------------------------------------------------------------------------------------------------------------------------------------------------------------------------------------------------------------------------------------------------------------------------------------------------------------------------------------------------------------------------------------------------------------------------------------------------------------------------------------------------------------------------------------------------------------------------------------------------------------------------------------------------------------------------------------------------------------------------------------------------------------------------------------------------------------------------------------------------------------------------------------------------------------------------------------------------------------------------------------------------------------------------------------------------------------------------------------------------------------------------------------------------------------------------------------------------------------------------------------------------------------------------------------------------------------------------------------------------------------------------------------------------------------------------------------------------|
| 354 | 1l5A<br>(160)  | N | 11.03 | <p><b>TM-align: aliSize=95 (resi) RMSD=2.77 (Å)</b></p> <p>scvrdsnslvrdisqmpqssygieglshittvagalnghm-----KQEVWLOT-ISPGRTPHRL-SCHEVFTVKKKGTLLMGSSSLkypGqPOEIPFFONTTFSTIPVNDPFOVWNSDeHEFLQVLIISRP--KIFLYDwsMPH-TAAvlfpfvwdedc<br/> -----menkvinfkiiidsrgslvaeenkniptSIKRVYYIFdTKGEEPRGFNAKLEQVLCVNGSCRVLDDGN-----I-IOEITLDSpaVGLYVGPavwEMHDF-SQCVMMVLA-SYYDetDYLRQ-Y--DNFKKYI-----</p> <p>feaak-----<br/> -----akinle</p> <p><b>SARST: aliSize=93 (resi) RMSD=15.81 (Å)</b></p> <p>scvrdsnslvrdisqmpqssygieglshittvagalnghmkeve-----VWLOTSPG---ORTPIHRLSCHEVFTVKKKGTllmgssslkYPGQPDEIPFFONTTFSTIPVND--PHOVNSDEHedIOVLIISRPpAKIFLYddwSMpHTAAVLKF---PFVWDE-----<br/> -----menkvinfkiiidsrgslvaeenkniptSIKRVYYIFdTKGEEPRGFNA-----HKKLEVLVCLNGSCRVLDDGniIOEITLDSpa--VGLYVGPavwEMHDF-SQCVMMVLasdyYDETDYLRQYdnfkkyyia</p> <p>-----edcfeaak<br/> kinle-----</p> <p><b>BLAST: aliSize=32 (resi) iden=14.71% (20/136) simi=23.53% (32/136)</b></p> <p>scvrdsnslvrdisqmpqssygieglshittvagalnghmkevevwlqtispgrtpihrsceevftvlgkgtllmgssslkypgqp-----OEIIPFFONTTFSTIPVNDPFOVWNSDEHEFLQVLIISRPpAKIFLYD---DWSMPTHAAVLKF--PFVWDE-----<br/> -----menkvinfkiiidsrgslvaeenkniptSIKRVYYIFdTKGEEPRGFNAKLEQVLCVNGSCRVLDDGniIOEITLDSpaVGLYVGPavwEMHDF--SQCVMMVLA-SYYDetDYLRQ-Y--DNFKKYImhdffs</p> <p>-----feaak<br/> vmmvlasdydetdyirqydnfkkyyiakindle-----</p> <p><b>Proposed: aliSize=119 (resi) RMSD=2.39 (Å)</b></p> <p>scvrdsnslvrdisompoSSygiEGLSHITVAGA-LNHGMKQEVWLOT-ISPGRTPHRL-SCHEVFTVKKKGTLLMGSSSLkypgqpOEIIPFFONTTFSTIPVNDPFOVWNSDeHEFLQVLIISRPpAKIFLYDwsMPH-T-----aavlfkpfvwdedcfeaak<br/> -----mENKVIN--FKKII-D-SRGLVA-IEENKNIPTSIKRVYYIFdTKGEEPRGFNAKLEQVLCVNGSCRVLDDGNI-----IOEITLDSpaVGLYVGPavwEMHDFS--SQCVMMVLA-SYYDetDYLRQ-Y--DNFKKyiaKinde-----</p> |
|     | 2paeA<br>(136) |   |       | <p>-----feaak<br/> vmmvlasdydetdyirqydnfkkyyiakindle-----</p>                                                                                                                                                                                                                                                                                                                                                                                                                                                                                                                                                                                                                                                                                                                                                                                                                                                                                                                                                                                                                                                                                                                                                                                                                                                                                                                                                                                                                                                                                                                                                                                                                                                                                 |

|     |                |   |       |                                                                                                                                                                                                                                                                                                                                                                                                                                                                                                                                                                                                                                                                                                                                                                                                                                                                                                                                                                                                                                                                                                                                                                                                                                                                                                                                                                                                                                                                                                                                                                                                                                                                                                                                                   |
|-----|----------------|---|-------|---------------------------------------------------------------------------------------------------------------------------------------------------------------------------------------------------------------------------------------------------------------------------------------------------------------------------------------------------------------------------------------------------------------------------------------------------------------------------------------------------------------------------------------------------------------------------------------------------------------------------------------------------------------------------------------------------------------------------------------------------------------------------------------------------------------------------------------------------------------------------------------------------------------------------------------------------------------------------------------------------------------------------------------------------------------------------------------------------------------------------------------------------------------------------------------------------------------------------------------------------------------------------------------------------------------------------------------------------------------------------------------------------------------------------------------------------------------------------------------------------------------------------------------------------------------------------------------------------------------------------------------------------------------------------------------------------------------------------------------------------|
| 355 | 1l5A<br>(160)  | C | 11.03 | <p><b>TM-align: aliSize=95 (resi) RMSD=2.77 (Å)</b></p> <p>scvrdsnslvrdisqmpqssygieglshittvagalnghm-----KQEVWLOT-ISPGRTPHRL-SCHEVFTVKKKGTLLMGSSSLkypGqPOEIPFFONTTFSTIPVNDPFOVWNSDeHEFLQVLIISRP--KIFLYDwsMPH-TAAvlfpfvwdedc<br/> -----menkvinfkiiidsrgslvaeenkniptSIKRVYYIFdTKGEEPRGFNAKLEQVLCVNGSCRVLDDGN-----I-IOEITLDSpaVGLYVGPavwEMHDF-SQCVMMVLA-SYYDetDYLRQ-Y--DNFKKYI-----</p> <p>feaak-----<br/> -----akinle</p> <p><b>SARST: aliSize=93 (resi) RMSD=15.81 (Å)</b></p> <p>scvrdsnslvrdisqmpqssygieglshittvagalnghmkeve-----VWLOTSPG---ORTPIHRLSCHEVFTVKKKGTllmgssslkYPGQPDEIPFFONTTFSTIPVND--PHOVNSDEHedIOVLIISRPpAKIFLYddwSMpHTAAVLKF---PFVWDE-----<br/> -----menkvinfkiiidsrgslvaeenkniptSIKRVYYIFdTKGEEPRGFNA-----HKKLEVLVCLNGSCRVLDDGniIOEITLDSpa--VGLYVGPavwEMHDF-SQCVMMVLasdyYDETDYLRQYdnfkkyyia</p> <p>-----dcfeaak<br/> kinle-----</p> <p><b>BLAST: aliSize=32 (resi) iden=14.71% (20/136) simi=23.53% (32/136)</b></p> <p>scvrdsnslvrdisqmpqssygieglshittvagalnghmkevevwlqtispgrtpihrsceevftvlgkgtllmgssslkypgqp-----OEIIPFFONTTFSTIPVNDPFOVWNSDEHEFLQVLIISRPpAKIFLYD---DWSMPTHAAVLKF--PFVWDE-----<br/> -----menkvinfkiiidsrgslvaeenkniptSIKRVYYIFdTKGEEPRGFNAKLEQVLCVNGSCRVLDDGniIOEITLDSpaVGLYVGPavwEMHDFS--SQCVMMVLA-SYYDetDYLRQ-Y--DNFKKYImhdffs</p> <p>-----feaak<br/> vmmvlasdydetdyiraydnfkkyyiakindle-----</p> <p><b>Proposed: aliSize=94 (resi) RMSD=2.02 (Å)</b></p> <p>scvrdsnslvrdisqmpqssygieglshittvagalnghmk-----H-VEWLOT-ISPGRTPHRL-SCHEVFTVKKKGTLLMGSSSLkypgqpOEIIPFFONTTFSTIPVNDPFOVWNSDeHEFLQVLIISRPpAKIFLYDwsmpHTAAVLKfVWDE<br/> -----menkvinfkiiidsrgslvaeenkniptSIKRVYYIFdTKGEEPRGFNAKLEQVLCVNGSCRVLDDGNI-----IOEITLDSpaVGLYVGPavwEMHDFS--SQCVMMVLA-SYYDetDYLRQ-----Y</p> <p>CFAAK-----<br/> NKKYIakinle</p> |
|     | 2paeA<br>(136) |   |       | <p>-----feaak<br/> vmmvlasdydetdyiraydnfkkyyiakindle-----</p>                                                                                                                                                                                                                                                                                                                                                                                                                                                                                                                                                                                                                                                                                                                                                                                                                                                                                                                                                                                                                                                                                                                                                                                                                                                                                                                                                                                                                                                                                                                                                                                                                                                                                     |

|     |                |   |       |                                                                                                                                                                                                                                                                                                                                                                                                                                                                                                                                                                                                                                                                                                                                                                                                                                                                                                                                                                                                                                                                                                                                                                                                                                                                                                                                                                                                                                                                                                                                                                                                                                                                                                                                           |
|-----|----------------|---|-------|-------------------------------------------------------------------------------------------------------------------------------------------------------------------------------------------------------------------------------------------------------------------------------------------------------------------------------------------------------------------------------------------------------------------------------------------------------------------------------------------------------------------------------------------------------------------------------------------------------------------------------------------------------------------------------------------------------------------------------------------------------------------------------------------------------------------------------------------------------------------------------------------------------------------------------------------------------------------------------------------------------------------------------------------------------------------------------------------------------------------------------------------------------------------------------------------------------------------------------------------------------------------------------------------------------------------------------------------------------------------------------------------------------------------------------------------------------------------------------------------------------------------------------------------------------------------------------------------------------------------------------------------------------------------------------------------------------------------------------------------|
| 356 | 1l5A<br>(160)  | N | 11.19 | <p><b>TM-align: aliSize=94 (resi) RMSD=2.64 (Å)</b></p> <p>scvrdsnslvrdisqmpqssygieglshittvagalnghm-----KQEVWLOT-ISPGRTPHRL-SCHEVFTVKKKGTLLMGSSSLkypGqPOEIPFFONTTFSTIPVNDPFOVWNSDeHEFLQVLIISRP--KIFLYDwsMPH-TAAvlfpfvwdedcf<br/> -----enkvinfkiiidsrgslvaeenkniptSIKRVYYIFdTKGEEPRGFNAKLEQVLCVNGSCRVLDDGN-----I-IOEITLDSpaVGLYVGPavwEMHDFS--SQCVMMVLA-SYYDetDYLRQ-Y--DNFKKYI-----</p> <p>eaak-----<br/> -----iakinl</p> <p><b>SARST: aliSize=83 (resi) RMSD=3.55 (Å)</b></p> <p>scvrdsnslvrdisqmpqssygieglshittvagalnghmkevevwlqtispgrtpihrsceevftvlgkgtllmgssslkypgqpOEIIPFFONTTFSTIPVNDPFOVWNSDEHEFLQVLIISRPpAKIFLYddwSMpHTAAVLKfVWDE-----iflyddwsmp<br/> -----enkvinfkiiidsrgslvaeenkniptSIKRVYYIFdTKGEEPRGFNAKLEQVLCVNGSCRVLDDGNI-----IOEITLDSpaVGLYVGPavwEMHDFS--SQCVMMVLA-SYYDetDYLRQYdnfkkyyiakindle-----</p> <p>htaavlfkpfvwdedcfeaak</p> <p><b>BLAST: aliSize=32 (resi) iden=14.93% (20/134) simi=23.88% (32/134)</b></p> <p>scvrdsnslvrdisqmpqssygieglshittvagalnghmkevevwlqtispgrtpihrsceevftvlgkgtllmgssslkypgqp-----OEIIPFFONTTFSTIPVNDPFOVWNSDEHEFLQVLIISRPpAKIFLYD---DWSMPTHAAVLKF--PFVWDE-----<br/> -----enkvinfkiiidsrgslvaeenkniptSIKRVYYIFdTKGEEPRGFNAKLEQVLCVNGSCRVLDDGniIOEITLDSpaVGLYVGPavwEMHDFS--SQCVMMVLA-SYYDetDYLRQ-Y--DNFKKYImhdffs</p> <p>-----feaak<br/> vmmvlasdydetdyirqydnfkkyyiakindle-----</p> <p><b>Proposed: aliSize=118 (resi) RMSD=2.41 (Å)</b></p> <p>scvrdsnslvrdisompoSSygiEGLSHITVAGA-LNHGMKQEVWLOT-ISPGRTPHRL-SCHEVFTVKKKGTLLMGSSSLkypgqpOEIIPFFONTTFSTIPVNDPFOVWNSDeHEFLQVLIISRPpAKIFLYDwsMPH-T-----aavlfkpfvwdedcfeaak<br/> -----eN-KVI--NFKKII--DSRGLVA-IEENKNIPTSIKRVYYIFdTKGEEPRGFNAKLEQVLCVNGSCRVLDDGNI-----IOEITLDSpaVGLYVGPavwEMHDFS--SQCVMMVLA-SYYDetDYLRQ-Y--DNFKKyiaKinde-----</p> |
|     | 2paeB<br>(134) |   |       | <p>-----feaak<br/> vmmvlasdydetdyirqydnfkkyyiakindle-----</p>                                                                                                                                                                                                                                                                                                                                                                                                                                                                                                                                                                                                                                                                                                                                                                                                                                                                                                                                                                                                                                                                                                                                                                                                                                                                                                                                                                                                                                                                                                                                                                                                                                                                             |

|     |                                |   |                                                                                                                                                                                                                                                                                                                                                                                                                                                                                                                                                                                                                                                                                                                                                                                                                                                                                                                                                                                                                                                                                                                                                                                                                                                                                                                                                                                                                                                                                                                                                                                                                                                                                                                                                                                                      |
|-----|--------------------------------|---|------------------------------------------------------------------------------------------------------------------------------------------------------------------------------------------------------------------------------------------------------------------------------------------------------------------------------------------------------------------------------------------------------------------------------------------------------------------------------------------------------------------------------------------------------------------------------------------------------------------------------------------------------------------------------------------------------------------------------------------------------------------------------------------------------------------------------------------------------------------------------------------------------------------------------------------------------------------------------------------------------------------------------------------------------------------------------------------------------------------------------------------------------------------------------------------------------------------------------------------------------------------------------------------------------------------------------------------------------------------------------------------------------------------------------------------------------------------------------------------------------------------------------------------------------------------------------------------------------------------------------------------------------------------------------------------------------------------------------------------------------------------------------------------------------|
| 357 | 11r5A (160)<br><br>2paeB (134) | C | <p>11.19</p> <p><b>TM-align:</b> aliSize=94 (resi) RMSD=2.64 (Å)<br/> scvrdnslvrdisqmpqssygieglshittvagalnghm-----KEVEVWLOT-ISP GORTPIHRH-SCHEVFTVKKKGTLLMGSSSLkypGqPDEIPFFON-TTFSIPVNDPFOVWNSDEHEDLOVLV IISRPPA--KIFLYddWsmPH-TAavlkfpfvwde dcf<br/> -----enkvinfkkiidsrgslvaieenknipfSIKRVYYIFdTKGEEPRGFNAKkLQVLCVNGSCRVLDDGNI-----I-IOEITLDSPaVGLYVGPVAVWHEMHDfSSDCVMMVLA SDYYDetDYIRQ--Y-DNFkKY-----</p> <p>eaak-----<br/> ----iakinl</p> <p><b>SARST:</b> aliSize=83 (resi) RMSD=3.55 (Å)<br/> scvrdnslvrdisqmpqssygieglshittvagalnghm-----EVEVWLOTISP GORTPIHRH-SCHEVFTVKKKGTLLMGSSSLkypGqPOEIPFFONTTFSIPVNDPFOVWNSDEHEDLOVLV IISRPPAK-----iflyddwsmP<br/> -----enkvinfkkiidsrgslvaieenknipfsIKRVYYIFdTKGEEPRGFNAKkLQVLCVNGSCRVLDDGNI-----IQEITLDSPaVGLYVGPVAVWHEMHDfSSDCVMMVLA-----SDYYDetdyiraydnfkkyiakinl-----iflyddwsmP<br/> htaavlkfpfvwde dcf eaak</p> <p><b>BLAST:</b> aliSize=32 (resi) iden=14.93% (20/134) simi=23.88% (32/134)<br/> scvrdnslvrdisqmpqssygieglshittvagalnghmkevevwlqtispgrtpihrsceevftvlgkgtllmgssslkypgqp-----OEIPFFONTTFSIPVNDPFOVWNSDEHEDLOVLV IISRPPAKIFLYD---DWSMPHTAAVLKF-PFVWDE-----<br/> -----enkvinfkkiidsrgslvaieenknipfSIKRVYYIFdTKGEEPRGFNAKkLQVLCVNGSCRVLDDGNI-----IQEITLDSPaVGLYVGPVAVWHEMHDfSSDCVMMVLA-----</p> <p>-----feak<br/> vmmvlasdydetdyiraydnfkkyiakinl-----</p> <p><b>Proposed:</b> aliSize=94 (resi) RMSD=2.04 (Å)<br/> scvrdnslvrdisqmpqssygieglshittvagalnghm-----EVEVWLOT-ISP GORTPIHRH-SCHEVFTVKKKGTLLMGSSSLkypGqPDEIPFFON-TTFSIPVNDPFOVWNSDEHEDLOVLV IISRPPA--KIFLYddwsmPhtaavlkfpfvwde dcf<br/> -----enkvinfkkiidsrgslvaieenknipfsIKRVYYIFdTKGEEPRGFNAKkLQVLCVNGSCRVLDDGNI-----I-IOEITLDSPaVGLYVGPVAVWHEMHDfSSDCVMMVLA SDYYDetDYIRQ-----Y-DNFkKY-----</p> <p>EAAK-----<br/> KKYIakinl</p>                                           |
| 358 | 11r5A (160)<br><br>2pakA (135) | N | <p>11.11</p> <p><b>TM-align:</b> aliSize=94 (resi) RMSD=2.59 (Å)<br/> scvrdnslvrdisqmpqssygieglshittvagalnghm-----KEVEVWLOT-ISP GORTPIHRH-SCHEVFTVKKKGTLLMGSSSLkypGqPDEIPFFON-TTFSIPVNDPFOVWNSDEHEDLOVLV IISRPPA--KIFLYddWsmPH-TAavlkfpfvwde dcf<br/> -----enkvinfkkiidsrgslvaieenknipfSIKRVYYIFdTKGEEPRGFNAKkLQVLCVNGSCRVLDDGNI-----I-IOEITLDSPaVGLYVGPVAVWHEMHDfSSDCVMMVLA SDYYDetDYIRQ--Y-DNFkKY-----</p> <p>eaak-----<br/> ----iakinle</p> <p><b>SARST:</b> aliSize=78 (resi) RMSD=3.49 (Å)<br/> scvrdnslvrdisqmpqssygieglshittvagalnghm-----EVEVWLOTISP GORTPIHRH-SCHEVFTVKKKGTLLMGSSSLkypGqPOEIPFFONTTFSIPVNDPFOVWNSDEHEDLOVLV IISRPPAKIFLY-----iisrppakifly<br/> -----enkvinfkkiidsrgslvaieenknipfsIKRVYYIFdTKGEEPRGFNAKkLQVLCVNGSCRVLDDGNI-----IQEITLDSPaVGLYVGPVAVWHEMHDfSSDCVMMVLA SDYYDetdyiraydnfkkyiakinle-----</p> <p>ddwsmPhtaavlkfpfvwde dcf eaak</p> <p><b>BLAST:</b> aliSize=6 (resi) iden=4.44% (6/135) simi=4.44% (6/135)<br/> scvrdnslvrdisqmpqssygieglshittvagalnghmkevevwlqtispgrtpihrsceevftvlgkgtllmgssslkypgqpqepiffqnttfsipvndphqvwnsdehedlqvlviisrppakiflyddwsmPhtaavlkf-----<br/> -----enkvinfkkiidsrgslvaieenknipfSIKRVYYIFdTKGEEPRGFNAKkLQVLCVNGSCRVLDDGNI-----IQEITLDSPaVGLYVGPVAVWHEMHDfSSDCVMMVLA-----</p> <p>-----feak<br/> prgfhanckleqvlvcngscrviiddgniqeiitldspavglyvgPAVWHEMHDfSSDCVmmvlasdydetdyiraydnfkkyiakinle-----</p> <p><b>Proposed:</b> aliSize=118 (resi) RMSD=2.33 (Å)<br/> scvrdnslvrdisqmpqssygieglshittvagalnghmkevevwlqtispgrtpihrsceevftvlgkgtllmgssslkypgqpDEIPFFON-TTFSIPVNDPFOVWNSDEHEDLOVLV IISRPPA--KIFLYddWsmPH-T-----aavlkfpfvwde dcf eaak<br/> -----enKVI--NFKKI--DSRGLVA-IEEnKIPFSIKRVYYIFdTKGEEPRGFNAKkLQVLCVNGSCRVLDDGNI-----I-IOEITLDSPaVGLYVGPVAVWHEMHDfSSDCVMMVLA SDYYDetDYIRQ--Y-DNFkKYiakinle-----</p>                         |
| 359 | 11r5A (160)<br><br>2pakA (135) | C | <p>11.11</p> <p><b>TM-align:</b> aliSize=94 (resi) RMSD=2.59 (Å)<br/> scvrdnslvrdisqmpqssygieglshittvagalnghm-----KEVEVWLOT-ISP GORTPIHRH-SCHEVFTVKKKGTLLMGSSSLkypGqPDEIPFFON-TTFSIPVNDPFOVWNSDEHEDLOVLV IISRPPA--KIFLYddWsmPH-TAavlkfpfvwde dcf<br/> -----enkvinfkkiidsrgslvaieenknipfSIKRVYYIFdTKGEEPRGFNAKkLQVLCVNGSCRVLDDGNI-----I-IOEITLDSPaVGLYVGPVAVWHEMHDfSSDCVMMVLA SDYYDetDYIRQ--Y-DNFkKY-----</p> <p>eaak-----<br/> ----iakinle</p> <p><b>SARST:</b> aliSize=78 (resi) RMSD=3.49 (Å)<br/> scvrdnslvrdisqmpqssygieglshittvagalnghm-----EVEVWLOTISP GORTPIHRH-SCHEVFTVKKKGTLLMGSSSLkypGqPOEIPFFONTTFSIPVNDPFOVWNSDEHEDLOVLV IISRPPAKIFLY-----iisrppakifly<br/> -----enkvinfkkiidsrgslvaieenknipfsIKRVYYIFdTKGEEPRGFNAKkLQVLCVNGSCRVLDDGNI-----IQEITLDSPaVGLYVGPVAVWHEMHDfSSDCVMMVLA SDYYDetdyiraydnfkkyiakinle-----</p> <p>ddwsmPhtaavlkfpfvwde dcf eaak</p> <p><b>BLAST:</b> aliSize=6 (resi) iden=4.44% (6/135) simi=4.44% (6/135)<br/> scvrdnslvrdisqmpqssygieglshittvagalnghmkevevwlqtispgrtpihrsceevftvlgkgtllmgssslkypgqpqepiffqnttfsipvndphqvwnsdehedlqvlviisrppakiflyddwsmPhtaavlkf-----<br/> -----enkvinfkkiidsrgslvaieenknipfSIKRVYYIFdTKGEEPRGFNAKkLQVLCVNGSCRVLDDGNI-----IQEITLDSPaVGLYVGPVAVWHEMHDfSSDCVMMVLA-----</p> <p>-----feak<br/> prgfhanckleqvlvcngscrviiddgniqeiitldspavglyvgPAVWHEMHDfSSDCVmmvlasdydetdyiraydnfkkyiakinle-----</p> <p><b>Proposed:</b> aliSize=94 (resi) RMSD=2.02 (Å)<br/> scvrdnslvrdisqmpqssygieglshittvagalnghm-----EVEVWLOT-ISP GORTPIHRH-SCHEVFTVKKKGTLLMGSSSLkypGqPDEIPFFON-TTFSIPVNDPFOVWNSDEHEDLOVLV IISRPPA--KIFLYddwsmPhtaavlkfpfvwde dcf<br/> -----enkvinfkkiidsrgslvaieenknipfsIKRVYYIFdTKGEEPRGFNAKkLQVLCVNGSCRVLDDGNI-----I-IOEITLDSPaVGLYVGPVAVWHEMHDfSSDCVMMVLA SDYYDetDYIRQ-----Y-DNFkKY-----</p> <p>EAAK-----<br/> KKYIakinle</p> |



|     |                |   |       |                                                                                                                                                                                                                                                                                                                                                                                                                                                                                                                                                                                                                                                                                                                                                                                                                                                                                                                                                                                                                                                                                                                                                                                                                                                                                                                                                                                                                                                                                                                                                                                                                                                                                                                         |
|-----|----------------|---|-------|-------------------------------------------------------------------------------------------------------------------------------------------------------------------------------------------------------------------------------------------------------------------------------------------------------------------------------------------------------------------------------------------------------------------------------------------------------------------------------------------------------------------------------------------------------------------------------------------------------------------------------------------------------------------------------------------------------------------------------------------------------------------------------------------------------------------------------------------------------------------------------------------------------------------------------------------------------------------------------------------------------------------------------------------------------------------------------------------------------------------------------------------------------------------------------------------------------------------------------------------------------------------------------------------------------------------------------------------------------------------------------------------------------------------------------------------------------------------------------------------------------------------------------------------------------------------------------------------------------------------------------------------------------------------------------------------------------------------------|
| 360 | 11r5A<br>(160) | N | 11.19 | <p>TM-align: aliSize=94 (resi) RMSD=2.61 (Å)<br/> scvrdnslvrdisqmpqssygieglshltvagalnghm-----KQVWVWLOT-ISPGRTPITRH-SCHEVFTVKKKGTLLMGSSS1kypGqPDEIPPFON-TTFSIPVNDPQOVWNSDEHEDLOVLIISRPPA--KIFLYddWsmPH-TAavlkpfpwdedcf<br/> -----enkvinfkkiidsrgslvaieenkniPFSIKRVYYIFdTKGEEPRGFANANKLEQLVCLNNGSCRVIDDDGN-----I-IOETLDSPaVGLYVGPVAVWEMHDFS--SDCVMMVLASDYDeDYIRQ--Y-DNFkKY-----</p> <p>eaak-----<br/> ----iakinl</p> <p>SARST: aliSize=122 (resi) RMSD=13.14 (Å)<br/> scvrdnslvrdisq-----MPOSSYIEGLSHITVAGAlnhGMKEVEVWLOTISPGRTPITRHSCHEVFTVKKKGTLLMGSSSLkypGQOPEIPPFONTTFSIPVNDPQOVWNSDEHEDLOVLIISrppakiflyddwsMPHAAVLKfpfVWDEDCFEAA---k<br/> -----enkvinfkKIIDSRSLVAIEENKNIP---FSIKRVYYIFdTKGEEPRGFANANKLEQLVCLNNGSCRVIDDDGN-----IOETLDSPAVGLYVGPVAVWEMHDFS--SDCVMMVLASDY-----YDETDYIRQ---YDNFKKYIKinl-</p> <p>BLAST: aliSize=6 (resi) iden=4.48% (6/134) simi=4.48% (6/134)<br/> scvrdnslvrdisqmpqssygieglshltvagalnghmkevevwlqtispgrtpihrsceevftvlkgkgtllmgssslkypgqpeipffqnttfsipvndphqvnsdehedlqvlviisrppakiflyddwsmphtaavlkf-----enkvinfkkiidsrgslvaieenkniPFSIKRVYYIFdtkgee<br/> -----PFVWDEDC-----feak<br/> prgfhanckleqlvclngscrviddgniqeiltldspavglyvgPAVWEMHDFS--SDCVMMVLASDYdeDYIRQYDNFKKYIAkinl-----</p> <p>Proposed: aliSize=117 (resi) RMSD=2.33 (Å)<br/> scvrdnsl--VRDIsgMPOSSYIEGLSHITVAGA-LNHGMKEVEVWLOT-ISPGRTPITRH-SCHEVFTVKKKGTLLMGSSS-1kypgqPDEIPPFON-TTFSIPVNDPQOVWNSDEHEDLOVLIISRPPA--KIFLYddWsmPH--T-----aavlkfpfwdedcfeak<br/> -----enKVIN--FKKII--DSRGLVA-IEENKIPFSIKRVYYIFdTKGEEPRGFANANKLEQLVCLNNGSCRVIDDDGNi-----IOETLDSPaVGLYVGPVAVWEMHDFS--SDCVMMVLASDYDeDYIRQ--Y-DNFkKYIAkinl-----</p>                                                                                                  |
| 361 | 11r5A<br>(160) | C | 11.19 | <p>TM-align: aliSize=94 (resi) RMSD=2.61 (Å)<br/> scvrdnslvrdisqmpqssygieglshltvagalnghm-----KQVWVWLOT-ISPGRTPITRH-SCHEVFTVKKKGTLLMGSSS1kypGqPDEIPPFON-TTFSIPVNDPQOVWNSDEHEDLOVLIISRPPA--KIFLYddWsmPH-TAavlkpfpwdedcf<br/> -----enkvinfkkiidsrgslvaieenkniPFSIKRVYYIFdTKGEEPRGFANANKLEQLVCLNNGSCRVIDDDGN-----I-IOETLDSPaVGLYVGPVAVWEMHDFS--SDCVMMVLASDYDeDYIRQ--Y-DNFkKY-----</p> <p>eaak-----<br/> ----iakinl</p> <p>SARST: aliSize=122 (resi) RMSD=13.14 (Å)<br/> scvrdnslvrdisq-----MPOSSYIEGLSHITVAGAlnhGMKEVEVWLOTISPGRTPITRHSCHEVFTVKKKGTLLMGSSSLkypGQOPEIPPFONTTFSIPVNDPQOVWNSDEHEDLOVLIISrppakiflyddwsMPHTAAVLKfpfVWDEDCFEAA---k<br/> -----enkvinfkKIIDSRSLVAIEENKNIP---FSIKRVYYIFdTKGEEPRGFANANKLEQLVCLNNGSCRVIDDDGN-----IOETLDSPAVGLYVGPVAVWEMHDFS--SDCVMMVLASDY-----YDETDYIRQ---YDNFKKYIKinl-</p> <p>BLAST: aliSize=6 (resi) iden=4.48% (6/134) simi=4.48% (6/134)<br/> scvrdnslvrdisqmpqssygieglshltvagalnghmkevevwlqtispgrtpihrsceevftvlkgkgtllmgssslkypgqpeipffqnttfsipvndphqvnsdehedlqvlviisrppakiflyddwsmphtaavlkf-----enkvinfkkiidsrgslvaieenkniPFSIKRVYYIFdtkgee<br/> -----PFVWDEDC-----feak<br/> prgfhanckleqlvclngscrviddgniqeiltldspavglyvgPAVWEMHDFS--SDCVMMVLASDYdeDYIRQYDNFKKYIAkinl-----</p> <p>Proposed: aliSize=94 (resi) RMSD=2.04 (Å)<br/> scvrdnslvrdisqmpqssygieglshltvagalnghmk-----EVEVWLOT-ISPGRTPITRH-SCHEVFTVKKKGTLLMGSSS-1kypgqPDEIPPFON-TTFSIPVNDPQOVWNSDEHEDLOVLIISRPPA--KIFLYddwsmphtaavlkfpfwdedcFEAC<br/> -----enkvinfkkiidsrgslvaieenkniPFSIKRVYYIFdTKGEEPRGFANANKLEQLVCLNNGSCRVIDDDGNi-----I-IOETLDSPaVGLYVGPVAVWEMHDFS--SDCVMMVLASDYDeDYIRQ-----YDNFKKYIAkinl</p> <p>EAak-----<br/> KkYIAkinl</p>                                                                          |
| 362 | 11r5A<br>(160) | N | 10.37 | <p>TM-align: aliSize=94 (resi) RMSD=2.59 (Å)<br/> scvrdnslvrdisqmpqssygieglshltvagalnghm-----KQVWVWLOT-ISPGRTPITRH-SCHEVFTVKKKGTLLMGSSS1kypGqPDEIPPFON-TTFSIPVNDPQOVWNSDEHEDLOVLIISRPPA--KIFLYddWsmPH-TAavlkpfpwdedcf<br/> -----enkvinfkkiidsrgslvaieenkniPFSIKRVYYIFdTKGEEPRGFANANKLEQLVCLNNGSCRVIDDDGN-----I-IOETLDSPaVGLYVGPVAVWEMHDFS--SDCVMMVLASDYDeDYIRQ--Y-DNFkKY-----</p> <p>eaak-----<br/> ----iakinle</p> <p>SARST: aliSize=81 (resi) RMSD=5.68 (Å)<br/> scvrdnslvrdisqmpqssygieglshltvagalnghmk-----EVEVWLOTISPGRTPITRHSCHEVFTVKKKGTLLMGSSSLkypGQOPEIPPFONTTFSIPVNDPQOVWNSDEHEDLOVLIIS-----rppakiflyddw<br/> -----enkvinfkkiidsrgslvaieenkniPFSIKRVYYIFdTKGEEPRGFANANKLEQLVCLNNGSCRVIDDDGN-----IOETLDSPAVGLYVGPVAVWEMHDFS--SDCVMMVLASDYdeDYIRQYDNFKKYIAkinle-----</p> <p>smphataavlkfpfwdedcfeak<br/> -----</p> <p>BLAST: aliSize=25 (resi) iden=8.89% (12/135) simi=18.52% (25/135)<br/> scvrdnslvrdisqmpqssygieglshltvagalnghmkevevwlqtispgrtpihrsceevftvlkgkgtllmgssslkypgqpeipffqnttfsipvndphqvnsdehedlqvlviisrppakiflyddwsmphtaavlkf-----enkvinfkkiidsrgslvaieenkniPFSIKRVYYIFdtkgee<br/> -----enkvinfkkiidsrgslvaieenkniPFSIKRVYYIFdTKGEEPRGFANANKLEQLVCLNNGSCRVIDDDGNi-----IOETLDSPaVGLYVGPVAVWEMHDFS--SDCVMMVLASDYdeDYIRQYDNFKKYIAkinle-----</p> <p>sdvmmvlasdydeDYIRQYDNFKKYIAkinle-----</p> <p>Proposed: aliSize=119 (resi) RMSD=2.41 (Å)<br/> scvrdnslvrdisqmpqssygieglshltvagalnghmk-----EVEVWLOT-ISPGRTPITRH-SCHEVFTVKKKGTLLMGSSS-1kypgqPDEIPPFON-TTFSIPVNDPQOVWNSDEHEDLOVLIISRPPA--KIFLYddWsmPH-T-----aavlkfpfwdedcfeak<br/> -----enKVIN--FKKII--DSRGLVA-IEENKIPFSIKRVYYIFdTKGEEPRGFANANKLEQLVCLNNGSCRVIDDDGNi-----I-IOETLDSPaVGLYVGPVAVWEMHDFS--SDCVMMVLASDYDeDYIRQ--Y-DNFkKYIAkinle-----</p> |
| 362 | 2pakB<br>(134) |   |       |                                                                                                                                                                                                                                                                                                                                                                                                                                                                                                                                                                                                                                                                                                                                                                                                                                                                                                                                                                                                                                                                                                                                                                                                                                                                                                                                                                                                                                                                                                                                                                                                                                                                                                                         |

|     |                |   |       |                                                                                                                                                                                                                                                                                                                                                                                                                                                                                                                                                                                                                                                                                                                                                                                                                                                                                                                                                                                                                                                                                                                                                                                                                                                                    |
|-----|----------------|---|-------|--------------------------------------------------------------------------------------------------------------------------------------------------------------------------------------------------------------------------------------------------------------------------------------------------------------------------------------------------------------------------------------------------------------------------------------------------------------------------------------------------------------------------------------------------------------------------------------------------------------------------------------------------------------------------------------------------------------------------------------------------------------------------------------------------------------------------------------------------------------------------------------------------------------------------------------------------------------------------------------------------------------------------------------------------------------------------------------------------------------------------------------------------------------------------------------------------------------------------------------------------------------------|
| 363 | 1l5A<br>(160)  | C | 10.37 | <p><b>TM-align:</b> aliSize=94 (resi) RMSD=2.59 (Å)<br/> scvrdnslvrdisqmpqssygieglshltvagalnghm-----K E V E W L O T - I S P G O R T P I H R H - S C E E F T V I K K G T L L M G S S S l k y p G a P O E I P F F O N - T T F S I P V N D P H O V W N S D e H E D L O V L V I I S R P P A - - K I F L Y d d w s M P H - T A a v l k f p f w d e d c f<br/> -----enkvinfkkiidsrgslvaieenknipfSIKRVYYIFdTKGEEPRGFNANKKLEQVLCVNGSCRVLDDGNI-----I-IQEI TL DSPaVGLYVGPVAVWEMHDFS--SFCVMMVLA SDYYDe tDYIRQ--Y--DNFkKY-----</p> <p>eaak-----<br/> ----iakinle</p> <p><b>SARST:</b> aliSize=81 (resi) RMSD=5.68 (Å)<br/> scvrdnslvrdisqmpqssygieglshltvagalnghm-----E V E W L O T I S P G O R T P I H R H S C E E F T V I K K G T L L M G S S S l k y p G O P O E I P F F O N T T F S I P V N D P H O V W N S D E H E D L O V L V I I S ----- r p p a k i f l y d d w<br/> -----enkvinfkkiidsrgslvaieenknipfS I K R V Y Y I F D T K G E E P R G F N A N K K L E Q V L C V N G S C R V L D D G N I ----- I Q E I T L D S P A V G L Y V G P A V W E M H D F S S D C V M M V L A S D Y d e t d y i r q y d n f k k y i a k i n l e -----</p> <p><b>smph</b>taavlkfpfvwde dcf<br/> -----</p>                                                                                     |
|     | 2pamA<br>(135) |   |       | <p><b>BLAST:</b> aliSize=25 (resi) iden=8.89% (12/135) simi=18.52% (25/135)<br/> scvrdnslvrdisqmpqssygieglshltvagalnghmkevevwlqtispgqrtpihrhsceevftvlkgkgtllmgssslkypgqp-----O E I P F F O N T T F S I - - P V N D P H O V W N S D E H E D I O V L V I I S r P P A K I F L Y D D -----<br/> -----enkvinfkkiidsrgslvaieenknipfS I K R V Y Y I f d T K G E E P R G F N A N K K L E - O V L V C L N - G S C R V I I - D D g n i i q e i t l d s p a v g l y v g p a v w h e m h d f s</p> <p>-----wsmph</p> taavlkfpfvwde dcf<br>-----<br>sdcvmmvlasdydetdyir q y d n f k k y i a k i n l e ----- <p><b>Proposed:</b> aliSize=94 (resi) RMSD=2.01 (Å)<br/> scvrdnslvrdisqmpqssygieglshltvagalnghm-----E V E W L O T - I S P G O R T P I H R H - S C E E F T V I K K G T L L M G S S S - l k y p g q P O E I P F F O N - T T F S I P V N D P H O V W N S D e H E D L O V L V I I S R P P A - - K I F L Y d d w s m p h t a a v l k f p f w d e d c f<br/> -----enkvinfkkiidsrgslvaieenknipfS I K R V Y Y I F D T K G E E P R G F N A N K K L E Q V L C V N G S C R V L D D G N I ----- I Q E I T L D S P a V G L Y V G P A V W E M H D F S - - S F C V M M V L A S D Y Y D e t D Y I R Q - - Y - - D N F k K Y -----</p> <p>E A A K -----<br/> K K Y I a k i n l e</p> |
| 364 | 1l5A<br>(160)  | N | 10.45 | <p><b>TM-align:</b> aliSize=94 (resi) RMSD=2.59 (Å)<br/> scvrdnslvrdisqmpqssygieglshltvagalnghm-----K E V E W L O T - I S P G O R T P I H R H - S C E E F T V I K K G T L L M G S S S l k y p G a P O E I P F F O N - T T F S I P V N D P H O V W N S D e H E D L O V L V I I S R P P A - - K I F L Y d d w s M P H - T A a v l k f p f w d e d c f<br/> -----enkvinfkkiidsrgslvaieenknipfSIKRVYYIFdTKGEEPRGFNANKKLEQVLCVNGSCRVLDDGNI-----I-IQEI TL DSPaVGLYVGPVAVWEMHDFS--SFCVMMVLA SDYYDe tDYIRQ--Y--DNFkKY-----</p> <p>eaak-----<br/> ----iakinl</p> <p><b>SARST:</b> aliSize=90 (resi) RMSD=5.59 (Å)<br/> scvrdnslvrdisqmpqssygieglshltvagalnghm-----E V E W L O T I S P G O R T P I H R H S C E E F T V I K K G T L L M G S S S l k y p G O P O E I P F F O N T T F S I P V N D P H O V W N S D E H E D L O V L V I I S r p p a k i f l y d d w s M P H A A V L K -----<br/> -----enkvinfkkiidsrgslvaieenknipfS I K R V Y Y I F D T K G E E P R G F N A N K K L E Q V L C V N G S C R V L D D G N I ----- I Q E I T L D S P A V G L Y V G P A V W E M H D F S S D C V M M V L A S D Y ----- Y D E I D Y I R Q y d n f k k y i a k i n l</p> <p>fpfvwde dcf<br/> -----</p>                                                                                     |
|     | 2pamB<br>(134) |   |       | <p><b>BLAST:</b> aliSize=25 (resi) iden=8.96% (12/134) simi=18.66% (25/134)<br/> scvrdnslvrdisqmpqssygieglshltvagalnghmkevevwlqtispgqrtpihrhsceevftvlkgkgtllmgssslkypgqp-----O E I P F F O N T T F S I - - P V N D P H O V W N S D E H E D I O V L V I I S r P P A K I F L Y D D -----<br/> -----enkvinfkkiidsrgslvaieenknipfS I K R V Y Y I f d T K G E E P R G F N A N K K L E - O V L V C L N - G S C R V I I - D D g n i i q e i t l d s p a v g l y v g p a v w h e m h d f s</p> <p>-----wsmph</p> taavlkfpfvwde dcf<br>-----<br>sdcvmmvlasdydetdyir q y d n f k k y i a k i n l ----- <p><b>Proposed:</b> aliSize=117 (resi) RMSD=2.30 (Å)<br/> scvrdnsl--VRDIsqMPOSSyglEGLSHITvAGA-LHGMKEVWLOT-ISPGORTPIHRH-SC E E F T V I K K G T L L M G S S S - l k y p g q P O E I P F F O N - T T F S I P V N D P H O V W N S D e H E D L O V L V I I S R P P A - - K I F L Y d d w s M P H - - T - - - - - a a v l k f p f w d e d c f e a a k<br/> -----enkvIN--FKKI--DSRGSLVA-IEENKIPfSIKRVYYIFdTKGEEPRGFNANKKLEQVLCVNGSCRVLDDGNI-----I Q E I T L D S P a V G L Y V G P A V W E M H D F S - - S F C V M M V L A S D Y Y D e t D Y I R Q - - Y - - D N F k K Y i a k i n l -----</p>                                                                                |
| 365 | 1l5A<br>(160)  | C | 10.45 | <p><b>TM-align:</b> aliSize=94 (resi) RMSD=2.59 (Å)<br/> scvrdnslvrdisqmpqssygieglshltvagalnghm-----K E V E W L O T - I S P G O R T P I H R H - S C E E F T V I K K G T L L M G S S S l k y p G a P O E I P F F O N - T T F S I P V N D P H O V W N S D e H E D L O V L V I I S R P P A - - K I F L Y d d w s M P H - T A a v l k f p f w d e d c f<br/> -----enkvinfkkiidsrgslvaieenknipfSIKRVYYIFdTKGEEPRGFNANKKLEQVLCVNGSCRVLDDGNI-----I-IQEI TL DSPaVGLYVGPVAVWEMHDFS--SFCVMMVLA SDYYDe tDYIRQ--Y--DNFkKY-----</p> <p>eaak-----<br/> ----iakinl</p> <p><b>SARST:</b> aliSize=90 (resi) RMSD=5.59 (Å)<br/> scvrdnslvrdisqmpqssygieglshltvagalnghm-----E V E W L O T I S P G O R T P I H R H S C E E F T V I K K G T L L M G S S S l k y p G O P O E I P F F O N T T F S I P V N D P H O V W N S D E H E D L O V L V I I S r p p a k i f l y d d w s M P H T A A V L K -----<br/> -----enkvinfkkiidsrgslvaieenknipfS I K R V Y Y I F D T K G E E P R G F N A N K K L E Q V L C V N G S C R V L D D G N I ----- I Q E I T L D S P A V G L Y V G P A V W E M H D F S S D C V M M V L A S D Y ----- Y D E I D Y I R Q y d n f k k y i a k i n l</p> <p><b>fpfvwde</b> dcf<br/> -----</p>                                                                            |
|     | 2pamB<br>(134) |   |       | <p><b>BLAST:</b> aliSize=25 (resi) iden=8.96% (12/134) simi=18.66% (25/134)<br/> scvrdnslvrdisqmpqssygieglshltvagalnghmkevevwlqtispgqrtpihrhsceevftvlkgkgtllmgssslkypgqp-----O E I P F F O N T T F S I - - P V N D P H O V W N S D E H E D I O V L V I I S r P P A K I F L Y D D -----<br/> -----enkvinfkkiidsrgslvaieenknipfS I K R V Y Y I f d T K G E E P R G F N A N K K L E - O V L V C L N - G S C R V I I - D D g n i i q e i t l d s p a v g l y v g p a v w h e m h d f s</p> <p>-----wsmph</p> taavlkfpfvwde dcf<br>-----<br>sdcvmmvlasdydetdyir q y d n f k k y i a k i n l ----- <p><b>Proposed:</b> aliSize=94 (resi) RMSD=2.00 (Å)<br/> scvrdnslvrdisqmpqssygieglshltvagalnghm-----E V E W L O T - I S P G O R T P I H R H - S C E E F T V I K K G T L L M G S S S - l k y p g q P O E I P F F O N - T T F S I P V N D P H O V W N S D e H E D L O V L V I I S R P P A - - K I F L Y d d w s m p h t a a v l k f p f w d e d c f<br/> -----enkvinfkkiidsrgslvaieenknipfS I K R V Y Y I F D T K G E E P R G F N A N K K L E Q V L C V N G S C R V L D D G N I ----- I Q E I T L D S P a V G L Y V G P A V W E M H D F S - - S F C V M M V L A S D Y Y D e t D Y I R Q - - Y - - D N F k K Y -----</p> <p>E A A K -----<br/> K K Y I a k i n l</p>     |

|     |                                                           |   |       |                                                                                                                                                                                                                                                                                                                                                                                                                                                                                                                                                                                                                                                                                                                                                                                                                                                                                                                                                                                                                                                                                                                                                                                                                                                                                                                                                                                                                                                                                                                                                                                                                                                                                                                                                                                                                                                                                     |
|-----|-----------------------------------------------------------|---|-------|-------------------------------------------------------------------------------------------------------------------------------------------------------------------------------------------------------------------------------------------------------------------------------------------------------------------------------------------------------------------------------------------------------------------------------------------------------------------------------------------------------------------------------------------------------------------------------------------------------------------------------------------------------------------------------------------------------------------------------------------------------------------------------------------------------------------------------------------------------------------------------------------------------------------------------------------------------------------------------------------------------------------------------------------------------------------------------------------------------------------------------------------------------------------------------------------------------------------------------------------------------------------------------------------------------------------------------------------------------------------------------------------------------------------------------------------------------------------------------------------------------------------------------------------------------------------------------------------------------------------------------------------------------------------------------------------------------------------------------------------------------------------------------------------------------------------------------------------------------------------------------------|
| 366 | <p><b>Im1dA (163)</b></p> <hr/> <p><b>li1dD (161)</b></p> | C | 11.18 | <p><b>TM-align:</b> aliSize=124 (resi) RMSD=3.21 (Å)<br/> -----LDFDILndgthrNMKLLIDLKNI FSRQLPKMPKEYIVKLVFD-----H-HESMIVLKN-KOKVIGICFRQYKPOR---ORFAEVAFLAVTANEVVRGYTRMKNFKDHMOKONIEYLLTYADNFAIGYFKKOGFTK---khrmpqekwkgy-LKDYDgggtlmecy<br/> gsmslpdGFYIRRM-----EEGDLEQVTEETLKV---TTVGTITPES---fckLiKYWneatvwndnedkkinQYNPVIIVDKrTETVAATGNIITERKiihelGLCGHIEDIANSKYGGQLKLIIDQLVTIGFDYGCYKIILDCDEKNVKFYEKCGFSNAG-----vEMQIR-----</p> <p>ihpyvdygr-<br/> -----k</p> <p><b>SARST:</b> aliSize=119 (resi) RMSD=7.51 (Å)<br/> 1-----LDFDILNDGTHRNMKLLIDLKNI FSRQLPKMPKEYIVKLVFD-----RHHE--MVILK-----NKOK-VIGICFRQYKPOR---FAEVAFLAVTANEVVRGYTRMKNFKDHMOKONIEYLLTYADNFAIGYFKKOGFTK-----khrmpqekwkgyikdydgg<br/> -gsmlpdgFYIRRMEEGDLEQVTEETLKV---ttvgtitPES---C-----KLKYWNEatvwndnedkkinImqYNPVIIVDKrTETVaATGNIITERKIIHElgLCHIEDIANSKYGGQLKLIIDQLVTIGFDYGCYKIILDCDEKNVKFYEKCGFSNAGvqmqrk-----</p> <p>tlmecyihpyvdygr<br/> -----</p> <p><b>BLAST:</b> aliSize=55 (resi) iden=16.15% (26/161) simi=34.16% (55/161)<br/> 1ldfd-----LNDGTL---HRNMKLLDLKNI FSRQLPKMPKEYIVKLVFD---RHHE--SMVILKN---KOKVIG---IIFrqykpqrfAEVAFLAVTANEVVRGYTRMKNFKDHMOKONIEYLLTYADNFAIGYFKKOGFTK-----khrmpqekwkgyik<br/> -----gsmslpdgfyirrmeeagleqvtetlkv---TTVGTITPESFCKLKYWneatvwndnedkkinImqYNPVIIVDKrTETVAATGNIITERKIIHElgL-----GHIEDIANSKYGGQLKLIIDQLVTIGFDYGCYKIILDCDEKNVKFYEKCGFSNAGvqmqrk-----</p> <p><b>dydgggtlmecyihpyvdygr</b><br/> -----</p> <p><b>Proposed:</b> aliSize=121 (resi) RMSD=2.03 (Å)<br/> -----LDFDILndgthrNMKLLIDLKNI FSRQLPKMPKEYIVKLVFD-----H-HESMIVLKN-KOKVIGICFRQYKPOR---ORFAEVAFLAVTANEVVRGYTRMKNFKDHMOKONIEYLLTYADNFAIGYFKKOGFTK---khrmpqekwkgyikdydggTL<br/> gsmslpdGFYIRRM-----EEGDLEQVTEETLKV---TTVGTITPESfckLiKYWneatvwndnedkkinQYNPVIIVDKrTETVAATGNIITERKiihelGLCGHIEDIANSKYGGQLKLIIDQLVTIGFDYGCYKIILDCDEKNVKFYEKCGFSNAG-----vEMQIR-----</p> <p>MECYIhpyvdygr<br/> QIRK-----</p> |
| 367 | <p><b>Im1dA (163)</b></p> <hr/> <p><b>Imk4A (157)</b></p> | M | 14.01 | <p><b>TM-align:</b> aliSize=132 (resi) RMSD=2.51 (Å)<br/> LDFDILndgthrnmkllldlknifsrqlpkmpkeyivkvlvfd---RHHE--SMVILKNKOKVIGICFRQYKPORFAEVAFLAVTANEVVRGYTRMKNFKDHMOKONIEYLLTYADNFAIGYFKKOGFTK---khrmpqekwkgyikdydgggtlmecyihpyvdygr<br/> HMDIRTIIS-----S-DYEMVTSVLNEWWggRQLK---EKLP--RLffEIQdtSFIITSEH--NSMTFLIGFSQSdPETAYIHSGHPDFRKMQIKQLYDVEIETVKORGCTRVKCVTSpvkVSIAMHTLGFEDIK-----gktvngisvfanYDgpgQDRVLFVKN-----</p> <p><b>SARST:</b> aliSize=112 (resi) RMSD=6.62 (Å)<br/> 1ldfdilndgthrnmkllldlknifsrqlpkmpkeyivkvlvfd---RHHE--SMVILKNKOKVIGICFRQYKPORFAEVAFLAVTANEVVRGYTRMKNFKDHMOKONIEYLLTYADNFAIGYFKKOGFTK---khrmpqekwkgyikdydgggtlmecyihpyvdygr<br/> -----hmdirtitssdyemvtsvlnewwggRQLK---EKLP--RLffEIQdtSFIITSEH--NSMTFLIGFSQSdPETAYIHSGHPDFRKMQIKQLYDVEIETVKORGCTRVKCVTSpvkVSIAMHTLGFEDIKGTGK---TVNGISVFAnydgpqg</p> <p><b>-GTLMECY-ihpyvdygr</b><br/> dRVLVFNi-----</p> <p><b>BLAST:</b> aliSize=47 (resi) iden=14.01% (22/157) simi=29.94% (47/157)<br/> 1ldfdilndgthrnmkllldlknifsrqlpkmpkeyivkvlvfd---RHHE--SMVILKNKOKVIGICFRQYKPORFAEVAFLAVTANEVVRGYTRMKNFKDHMOKONIEYLLTYADNFAIGYFKKOGFTK---khrmpqekwkgyikdydgggtlmecyihpyvdygr<br/> -----hmdirtitssdyemvtsvlnewwggRQLK---EKLP--RLffEIQdtSFIITSEH--NSMTFLIGFSQSdPETAYIHSGHPDFRKMQIKQLYDVEIETVKORGCTRVKCVTSpvkVSIAMHTLGFEDIKGTGK---TVNGISVFAnydgpqg</p> <p><b>gtlmecyihpyvdygr</b><br/> 1-----</p> <p><b>Proposed:</b> aliSize=141 (resi) RMSD=2.36 (Å)<br/> LDFDILndgthrnmkllldlknifsrqlpkmpkeyivkvlvfd---RHHE--SMVILKNKOKVIGICFRQYKPORFAEVAFLAVTANEVVRGYTRMKNFKDHMOKONIEYLLTYADNFAIGYFKKOGFTK---khrmpqekwkgyikdydgggtlmecyihpyvdygr<br/> HMDIRTIIS-----S-DYEMVTSVLNEWWggRQLK---EKLP--RLffEIQdtSFIITSEH--NSMTFLIGFSQSdPETAYIHSGHPDFRKMQIKQLYDVEIETVKORGCTRVKCVTSpvkVSIAMHTLGFEDIKgtktVNGISVFAnydgpqg---RVLFVKN-----</p>                                                                                             |
| 368 | <p><b>Im1dA (163)</b></p> <hr/> <p><b>lqsmA (150)</b></p> | C | 13.33 | <p><b>TM-align:</b> aliSize=128 (resi) RMSD=2.96 (Å)<br/> -LDFDILndgthrNMKLLIDLKNI FSRQLPKMPKEYIVKLVFD-----H-HESMIVLKN-KOKVIGICFRQYKPOR---ORFAEVAFLAVTANEVVRGYTRMKNFKDHMOKONIEYLLTYADNFAIGYFKKOGFTK---khrmpqekwkgyikdydgggtlmecyihpyvdygr<br/> dnITVRFV-----E-NDKEGWQRLWKSQD-FYEVSPDdLDDFNFRGfIdpniKMWAAAVESsSEKIIGMNFNHTTWDfkdkiYINDYDENSRVKAGGKIIOFVYDEADNLGTPSVYWCTDESnrAQLLYVNGYKAPK-----iL-----yK-----rkggy</p> <p><b>SARST:</b> aliSize=136 (resi) RMSD=7.88 (Å)<br/> 1--LDFDILNDGTHRNMKLLIDLKNI FSRQLPKMPKEYIVKLVFD-----H-HESMIVLKN-KOKVIGICFRQYKPOR---ORFAEVAFLAVTANEVVRGYTRMKNFKDHMOKONIEYLLTYADNFAIGYFKKOGFTK---khrmpqekwkgyikdydgggtlmecyihpyvdygr<br/> -dnITVRFVEND---KEGWQRLWKSQD-FYEVSPDdLDDFNFRGfIdpniKMWAAAVESsSEKIIGMNFNHTTWDfkdkiYINDYDENSRVKAGGKIIOFVYDEADNLGTPSVYWCTDESnrAQLLYVNGYKAPK-----iL-----yK-----rkggy</p> <p><b>BLAST:</b> aliSize=32 (resi) iden=12.00% (18/150) simi=21.33% (32/150)<br/> 1ldfdilndgthrnmkllldlknifsrqlpkmpkeyivkvlvfd---RHHE--SMVILKNKOKVIGICFRQYKPORFAEVAFLAVTANEVVRGYTRMKNFKDHMOKONIEYLLTYADNFAIGYFKKOGFTK---khrmpqekwkgyikdydgggtlmecyihpyvdygr<br/> -----dnitvrfvtendkegwqrlwksyqdfyevspddlddfnfrgfidpniKMWAAAVESsSEKIIGMNFNHTTWDfkdkiYINDYDENSRVKAGGKIIOFVYDEADNLGTPSVYWCTDESnrAQLLYVNGYKAPK-----iL-----yK-----rkggy</p> <p><b>-----mpqekwkgyikdydgggtlmecyihpyvdygr</b><br/> 1lyvkvgykpkilykrkgy-----</p> <p><b>Proposed:</b> aliSize=129 (resi) RMSD=2.29 (Å)<br/> -LDFDILndgthrNMKLLIDLKNI FSRQLPKMPKEYIVKLVFD-----H-HESMIVLKN-KOKVIGICFRQYKPOR---ORFAEVAFLAVTANEVVRGYTRMKNFKDHMOKONIEYLLTYADNFAIGYFKKOGFTK---khrmpqekwkgyikdydgggtlmecyihpyvdygr<br/> dnITVRFV-----TENDKEGWQRLWKSQDfyEVSPDdLDDFNFRGfIdpniKMWAAAVESsSEKIIGMNFNHTTWDfkdkiYINDYDENSRVKAGGKIIOFVYDEADNLGTPSVYWCTDESnrAQLLYVNGYKAPK-----iL-----yK-----rkggy</p>                                                                                                 |

|     |                                       |   |                                                                                                                                                                                                                                                                                                                                                                                                                                                                                                                                                                                                                                                                                                                                                                                                                                                                                                                                                                                                                                                                                                                                                                                                                                                                                                                                                                                                                                                                                                                                                                                                                                                                                                                                                                                                                            |
|-----|---------------------------------------|---|----------------------------------------------------------------------------------------------------------------------------------------------------------------------------------------------------------------------------------------------------------------------------------------------------------------------------------------------------------------------------------------------------------------------------------------------------------------------------------------------------------------------------------------------------------------------------------------------------------------------------------------------------------------------------------------------------------------------------------------------------------------------------------------------------------------------------------------------------------------------------------------------------------------------------------------------------------------------------------------------------------------------------------------------------------------------------------------------------------------------------------------------------------------------------------------------------------------------------------------------------------------------------------------------------------------------------------------------------------------------------------------------------------------------------------------------------------------------------------------------------------------------------------------------------------------------------------------------------------------------------------------------------------------------------------------------------------------------------------------------------------------------------------------------------------------------------|
| 369 | <p>1m1dA (163)</p> <p>1qsmB (149)</p> | C | <p>13.42</p> <p>TM-align: aliSize=128 (resi) RMSD=2.99 (Å)<br/> LLDFDILtndgThRNMKLLIDLKNI FSRQLPKMPKEY-TVKLVFD-----H-HESM I LKN-KOKVIGGICFROYK----PORFAEVAFLA TANEORVRYGTRM NKFKDHMOKONIEYLLTYADN-F--AIGYFKKOGFTKEHrmpqekw-Kgyik-Dydggtlmecyihpyvdygr----<br/> NITVRFV-----E-NDKEGWQRWKS YQD-FYEV SFPDdLDFNFGf ldpnIkMWA AAVESsSEKI IGMN FNHMT twdFKDKIYINDYDENSRVKAGKIQFVYDEADLGTPSVYWC TDES NhrQLLYV VGYKAPK-----iL---yK-----rkgy</p> <p>SARST: aliSize=120 (resi) RMSD=4.86 (Å)<br/> 1ldf-DILTNDGTHRNMKLLIDLKNI FSRQLPKMPK---EYIVKLVFDRHH-ESM I LKN--KOKVIGGICFROYKPORF----AEVAF A TANEORVRYGTRM NKFKDHMOKONIEYLLTYADNFAIGYFKK-----qftkehrmpqekwkgyikdydggtlmecyihpyvdygr<br/> -----nITVRFVTENDKEGWQRWKS YQDFYEV SFPdLdDFNFGFRFLDPN I kMWA AAVESsSEKI IGMN FNHMTTWdfkdkiYINDYDENSRVKAGKIQFVYDEADLGTPSVYWC TDES NHR AQLLYVkvgykapkilykrkgy-----</p> <p>BLAST: aliSize=32 (resi) iden=12.08% (18/149) simi=21.48% (32/149)<br/> 1ldfdiltndgthrnmkllidknlfsrqlpkmpkeyivklvfdrhhe-----SMVILKNKOKVIGGICFROYKPO-RFAEVAFLA TANEORVRYGTRM NKFKDHMOKONIEYLLTYADNfaigyfkkqgftKEHR---<br/> -----nITVRFVTENDKEGWQRWKS YQDFYEV SFPdLdDFNFGFRFLDPN I kMWA AAVESsSEKI IGMN FNHMTTWdfkdkiYINDYDENSRVKAGKIQFVYDEADLGTPSVYWC TDES NHR AQLLYVkvgykapkilykrkgy-----SNHRAql</p> <p>-----mpqekwkgyikdydggtlmecyihpyvdygr<br/> lyvkvgykapkilykrkgy-----</p> <p>Proposed: aliSize=129 (resi) RMSD=2.22 (Å)<br/> LLDFDILtndgthrNMKLLIDLKNI FSRQLP--KMPKE--YIV-KLVFD--R--H-HESM I LKN--KOKVIGGICFROYKPO----RFAEVAFLA TANEORVRYGTRM NKFKDHMOKONIEYLLTYADN-F--AIGYFKKOGFTKEhrmpqekwkgyikdydggtLMECYIHPYV-dygr<br/> NITVRFV-----TENDKEGWQRWKS YQDFYEV SFPDdL-DdFNFGFRFLDPN I kMWA AAVESsSEKI IGMN FNH-MT twdFKDKIYINDYDENSRVKAGKIQFVYDEADLGTPSVYWC TDES NhrQLLYV VGYKA-----PKILYKRKGYa----</p>                                                       |
| 370 | <p>1m1dA (163)</p> <p>1qsmD (152)</p> | C | <p>13.16</p> <p>TM-align: aliSize=127 (resi) RMSD=2.88 (Å)<br/> ---LLDFDILtndgThRNMKLLIDLKNI FSRQLPKMPKEY-TVKLVFD-----H-HESM I LKN--KOKVIGGICFROYK----PORFAEVAFLA TANEORVRYGTRM NKFKDHMOKONIEYLLTYADN-F--AIGYFKKOGFTKEHrmpqekw-Kgyik-Dydggtlmecyihpyvdygr----<br/> sedNITVRFV-----E-NDKEGWQRWKS YQD-FYEV SFPDdLDFNFGf ldpnIkMWA AAVESsSEKI IGMN FNHMT twdFKDKIYINDYDENSRVKAGKIQFVYDEADLGTPSVYWC TDES NhrQLLYV VGYKAPK-----iL---yK-----rkgy</p> <p>SARST: aliSize=136 (resi) RMSD=7.79 (Å)<br/> 1ldf----DILTNDGTHRNMKLLIDLKNI FSRQLPKMPKEYIVKLVFD---FDRH--HESM I LKN--KOKVIGGICFROYKPORF----AEVAF A TANEORVRYGTRM NKFKDHMOKONIEYLLTYADNFAIGYFKKqgftkehrmpQEKWkgyiKDYDGGTLMECY--ihpyvdygr<br/> ----sednITVRFVTENDKEGWQRWKS YQDFYEV SFPDdLDFNFGFRFLDPN I kMWA AAVESsSEKI IGMN FNHMTTWdfkdkiYINDYDENSRVKAGKIQFVYDEADLGTPSVYWC TDES NHR AQLLYVkvgykapkiykrkgy-----</p> <p>BLAST: aliSize=32 (resi) iden=11.84% (18/152) simi=21.05% (32/152)<br/> 1ldfdiltndgthrnmkllidknlfsrqlpkmpkeyivklvfdrhhe-----SMVILKNKOKVIGGICFROYKPO-RFAEVAFLA TANEORVRYGTRM NKFKDHMOKONIEYLLTYADNfaigyfkkqgftKEHR<br/> -----sednITVRFVTENDKEGWQRWKS YQDFYEV SFPdLdDFNFGFRFLDPN I kMWA AAVESsSEKI IGMN FNHMTTWdfkdkiYINDYDENSRVKAGKIQFVYDEADLGTPSVYWC TDES NHR AQLLYVkvgykapkiykrkgy-----SNHR</p> <p>-----mpqekwkgyikdydggtlmecyihpyvdygr<br/> aqlllyvkvgykapkiykrkgy-----</p> <p>Proposed: aliSize=129 (resi) RMSD=2.25 (Å)<br/> ---LLDFDILtndgthrNMKLLIDLKNI FSRQLP--KMPKE--YIVKLVFD--R--H-HESM I LKN--KOKVIGGICFROYKPO----ORFAEVAFLA TANEORVRYGTRM NKFKDHMOKONIEYLLTYADN-F--AIGYFKKOGFTkehrmpqekwkgyikdydggtLMECY---ihpyvdygr<br/> sedNITVRFV-----TENDKEGWQRWKS YQDFYEV SFPDdLDFNFGFRFLDPN I kMWA AAVESsSEKI IGMN FNH-MT twdFKDKIYINDYDENSRVKAGKIQFVYDEADLGTPSVYWC TDES NhrQLLYV VGYKAPK-----APKIYKRKGYa-----</p>                                   |
| 371 | <p>1m1dA (163)</p> <p>1s3zB (145)</p> | C | <p>9.66</p> <p>TM-align: aliSize=122 (resi) RMSD=2.48 (Å)<br/> LLDFDILtndgthrM KLLIDLKNI FSRQLPKMPKEYIV-KLVFD--RH--HESM I LKNKOKVIGGICFROYK-----ORFAEVAFLA TANEORVRYGTRM NKFKDHMOKONIEYLLTYADN-F--AIGYFKKOGFTKEHrmpqekwkgyik---Dydggtlmecyihpyvdygr----<br/> -MITROM-----NKTLEHWRGLRKQLWGHDPDAH IADGEEI I QAdhLASF I AMAD-GVALG FADASIRHDyngcdsSPVVFLEGI FVLP SFRORVAKO IAAVQRWGTNKGCREMASDTSpenTisQKVHQALGFEE T-----rviF-----yrkr</p> <p>SARST: aliSize=118 (resi) RMSD=6.01 (Å)<br/> 1ldfdiltndgthrnmkllidknlfsrqlpkmpkeyivklvfdrhheSMVILKNKOKVIGGICFROYKPO----R----FAEVAFLA TANEORVRYGTRM NKFKDHMOKONIEYLLTYADNFA---IGYFKKOGFTkehrmpqekwkgyikdydggtLMECY-ihpyvdygr<br/> -----mdirqmktHEHWRGLRKQLWGHDPDAH IADGEEI I QAdhLASF I AMADG-VALG FADASIR--HdyngcdsSPVVFLEGI FVLP SFRORVAKO IAAVQRWGTNKGCREMASDTSpenTisQKVHQALGFEE T-----E-----VIFYRKRc-----</p> <p>BLAST: aliSize=11 (resi) iden=4.14% (6/145) simi=7.59% (11/145)<br/> 1ldfdiltndgthrnmkllidknlfsrqlpkmpkeyivklvfdrhhesmvilknkqkvigicfrqykpqrfaevafavtaneovrygygtrlmnkfkdh-----MCKONIEYLLTYADNFAIGY-----<br/> -----mdirqmktHEHWRGLRKQLWGHDPDAH IADGEEI I QAdhLASF I AMADG-VALG FADASIR--HdyngcdsSPVVFLEGI FVLP SFRORVAKO IAAVQRWGTNKGCREMASDTSpenTisQKVHQALGFEE T-----E-----VIFYRKRc-----</p> <p>-----fkkqgftkehrmpqekwkgyikdydggtlmecyihpyvdygr<br/> rgvakqliaavqrwgtngcremasdtspenTisQKVHQALGFEE T-----E-----VIFYRKRc-----</p> <p>Proposed: aliSize=130 (resi) RMSD=2.20 (Å)<br/> LLDFDILtndgthrM KLLIDLKNI FSRQLPKMPKEYIVKLVFD--RH--HESM I LKNKOKVIGGICFROYKPO----ORFAEVAFLA TANEORVRYGTRM NKFKDHMOKONIEYLLTYADN-F--AIGYFKKOGFTKEhrmpqekwkgyikdydggtLMECYIHP-yvdygr<br/> -MITROM-----NKTLEHWRGLRKQLWGHDPDAH IADGEEI I QAdhLASF I AMAD-GVALG FADASIR--HdyngcdsSPVVFLEGI FVLP SFRORVAKO IAAVQRWGTNKGCREMASDTSpenTisQKVHQALGFEE T-----E-----RVIFYRKRc-----</p> |

|     |                                             |   |      |                                                                                                                                                                                                                                                                                                                                                                                                                                                                                                                                                                                                                                                                                                                                                                                                                                                                                                                                                                                                                                                                                                                                                                                                                                                                                                                                                                                                                                                                                                                                                                                                                                                                                                                                                                                                                                                                                        |
|-----|---------------------------------------------|---|------|----------------------------------------------------------------------------------------------------------------------------------------------------------------------------------------------------------------------------------------------------------------------------------------------------------------------------------------------------------------------------------------------------------------------------------------------------------------------------------------------------------------------------------------------------------------------------------------------------------------------------------------------------------------------------------------------------------------------------------------------------------------------------------------------------------------------------------------------------------------------------------------------------------------------------------------------------------------------------------------------------------------------------------------------------------------------------------------------------------------------------------------------------------------------------------------------------------------------------------------------------------------------------------------------------------------------------------------------------------------------------------------------------------------------------------------------------------------------------------------------------------------------------------------------------------------------------------------------------------------------------------------------------------------------------------------------------------------------------------------------------------------------------------------------------------------------------------------------------------------------------------------|
| 372 | <p>1m1dA (163)</p> <hr/> <p>1s5kA (153)</p> | C | 8.50 | <p><b>TM-align:</b> aliSize=122 (resi) RMSD=2.53 (Å)<br/> LDFDILtndgthrNMKLLIDLKNI FSROLPKMPEK---YIVKLVFD--RH--HE SMVILKKNKQVIGICFROYKP-----ORFAEVAFLAVTANEQVRG YGTRLMNKFKDHMOKONIEYLLTYADN-F--AIGYFKKQFTKEHrmpqekwkgyik---Dydggtlmecyihpyvdygr-<br/> glvprgshMDIROM-----KTHLEHW RGLRKQLW---GHPdDAH1ADGEEi1QAdhLASF1AMAD-GVAIGFADASIRHdyvngcdsSPVVFLEGI FLPSPFRQGVAKQIAAVQRWGTNKGCREMASDTSPEntiSOKVHQALGFEETe-----rvif-----y</p> <p>----<br/> rkrc</p> <p><b>SARST:</b> aliSize=117 (resi) RMSD=3.26 (Å)<br/> LDFDILtndgthrNMKLLIDLKNI FSROLPKMPEK---YIVKLVFD--RH--HE SMVILKKNKQVIGICFROYkp0----RF-----AEVAF LAVTANEQVRG YGTRLMNKFKDHMOKONIEYLLTYADN-F--AIGYFKKQFT-----kchrmpqekwkgyikdydggtlmecy<br/> -glvprgshMDIROMN-----KTHLEHW RGLRKQLW---GHDDAhladGEEILOADLASFIAMADG-VAIGFADASIR--HdyvngCds spvVLEGI FLPSPFRQGVAKQIAAVQRWGTNKGCREMASDTSPEntiSOKVHQALGFEETe-----rvifyrkr-----</p> <p>ihpyvdygr</p> <p><b>BLAST:</b> aliSize=11 (resi) iden=3.92% (6/153) simi=7.19% (11/153)<br/> l1dfdil tndgthrnmkllidlknifsrqlpkmpkeyivklvfdrhhesmvilknkqkviggicfrqykpqrfaevaf lavtaneqvr gygtrlmnkfkdh-----MOKONIEYLLTYADNFAIGY-----<br/> -----glvprgshmdi rqnkthlehwrgl rklwpgphddahl adgee iLADHLASF1AMADGVAIGFadasirhdyvngcds spv vlegi</p> <p>-----fkkqgftkchrmpqekwkgyikdydggtlmecyihpyvdygr</p> <p>fvlp s frqrgvakqli aavqrwgt nkgcremasdtspe ntisqkvhqal gfee rrvifyrkr-----</p> <p><b>Proposed:</b> aliSize=129 (resi) RMSD=2.16 (Å)<br/> LDFDILtndgthrNMKLLIDLKNI FSROLPKMPEK---YIVKLVFD--RH--HE SMVILKKNKQVIGICFROYKP-----ORFAEVAFLAVTANEQVRG YGTRLMNKFKDHMOKONIEYLLTYAD-NF--AIGYFKKQFTKEHrmpqekwkgyikDydggtLMECYIHP-yvdygr<br/> glvprgshMDIROM-----KTHLEHW RGLRKQLW---GHPdDAHLADGEEi1QAdhLASF1AMAD-GVAIGFADASIR-HdyvngcdsSPVVFLEGI FLPSPFRQGVAKQIAAVQRWGTNKGCREMASDTSPEntiSOKVHQALGFEET-----E-----RVI FYRKRCC-----</p>                                                             |
| 373 | <p>1m1dA (163)</p> <hr/> <p>lufhA (155)</p> | C | 9.68 | <p><b>TM-align:</b> aliSize=126 (resi) RMSD=2.96 (Å)<br/> LDFDILtndgthrNMKLLIDLKNI FSROLPKM-----P--KEYIVKLV--FD-RH--ESMVI LKKNKQVIGICFROYKPO--RFAEVAFLAVTANEQVRG YGTRLMNKFKDHMOKONIEYLLTYADN-F--AIGYFKKQFTKEHrmpqekwkgyikdydggtlmecyihpyvdygr-----<br/> TLMTPM-----QTEEFRSYLTYTTKHYAEKvkagtwlpedaq11SKQVFTDLPrgLETPHHLWSLKLNKEDIVGWLWIHAEPHPQOEAFIYDFGLYEPYRKG YAKQALAAALDQAARSMGTRKSLHVFahNqtARKLYEQTGFQETD-----V-----mskkl</p> <p><b>SARST:</b> aliSize=124 (resi) RMSD=7.33 (Å)<br/> l1dfdil tndgt-----HRNMKLLIDLKNI FSROLPKMPK---YIVKLV-----VFDRH--ESMVI LKKNKQVIGICFROYK--PQRF EAVAF LAVTANEQVRG YGTRLMNKFKDHMOKONIEYLLTYADNFAIGYF-----KQFTKEHrmpqekwkgyikdydgGTLMECY-ihpyv<br/> -----t imltpmqteefrSYLTYTTKHYAEKVKAGT-WLPDAQLskqvftdl1prgLETPLHLWSLKLNKEDIVGWLWIHAEPHPQOEAFIYDFGLYEPYRKG YAKQALAAALDQAARSMGTRKSLHVFahNQTAR1yeQTGFQETD-----E-----DVMVSKKL-----</p> <p>dygr<br/> ----</p> <p><b>BLAST:</b> aliSize=35 (resi) iden=11.61% (18/155) simi=22.58% (35/155)<br/> l1dfdil tndgthrnmkllidlknifsrqlpkmpkeyivklvfd-----t imltpmqteefrsyltyttkhyaeekvkagtwlpedaq11skqvftdl1prgletp-----HESMVI LKKNKQVIGICFROYKPORFAEVAFLAVTANEQVRG--YGTRLMNKFKDHMOKONIEYLL--TYADN-FAIGYFKKQFT<br/> -----t imltpmqteefrsyltyttkhyaeekvkagtwlpedaq11skqvftdl1prgletp-----HHLWSLKLNKEDIVGWLWIHA-EPEHPQOEAFIYDFGLYEPYRKG YAKQALAAALDQAARSMGTRKSLHVFahNQTARKLYEQTGFQETD-----V-----mskkl</p> <p>-----tchrmpqekwkgyikdydggtlmecyihpyvdygr<br/> qtdvmskkl-----</p> <p><b>Proposed:</b> aliSize=129 (resi) RMSD=2.46 (Å)<br/> LDFDILtndgthrNMKLLIDLKNI FSROL-PKM-----P--KEYIVKLV--F--DR--ESMVI LKKNKQVIGICFROYKP-O-RFAEVAFLAVTANEQVRG YGTRLMNKFKDHMOKONIEYLLTYADN-F--AIGYFKKQFTKEHrmpqekwkgyikdydGGTLMECYIhpyvdygr<br/> -tLMLTPM-----QTEEFRSYLTYTTKHYAEKvkagtwlpedaq11SKQVFTDLPrgLETPHHLWSLKLNKEDIVGWLWIHAEPHPQOEAFIYDFGLYEPYRKG YAKQALAAALDQAARSMGTRKSLHVFahNqtARKLYEQTGFQETD-----TDVMVSKKL-----</p> |
| 374 | <p>1m1dA (163)</p> <hr/> <p>lufhB (154)</p> | C | 9.09 | <p><b>TM-align:</b> aliSize=126 (resi) RMSD=2.75 (Å)<br/> LDFDILtndgthrNMKLLIDLKNI FSROL-PKM-----P--KEYIVKLV--F--DRH--ESMVI LKKNKQVIGICFROYKPO--RFAEVAFLAVTANEQVRG YGTRLMNKFKDHMOKONIEYLLTYADN-F--AIGYFKKQFTKEHrmpqekwkgyikdydGgtlmecyihpyvdygr-----<br/> -TLMTPM-----QTEEFRSYLTYTTKHYAEKvkagtwlpedaq11SKQVFTDLPrgLETPHHLWSLKLNKEDIVGWLWIHAEPHPQOEAFIYDFGLYEPYRKG YAKQALAAALDQAARSMGTRKSLHVFahNqtARKLYEQTGFQETD-----V-----skkl</p> <p><b>SARST:</b> aliSize=115 (resi) RMSD=5.73 (Å)<br/> l1dfdil tndgt-----HRNMKLLIDLKNI FSROLPKMPK---YIVKLV-----VFDRH--ESMVI LKKNKQVIGICFROYK--PQRF EAVAF LAVTANEQVRG YGTRLMNKFKDHMOKONIEYLLTYADNFAIGYF-----KQFT-----kchrmpqekwkgyikdydggtlm<br/> -----imltpmqteefrSYLTYTTKHYAEKVKAGT-WLPDAQLskqvftdl1PRGLETPHHLWSLKLNKEDIVGWLWIHAEPHPQOEAFIYDFGLYEPYRKG YAKQALAAALDQAARSMGTRKSLHVFahNQTAR1yeQTGFQETD-----tdvmskkl-----</p> <p>ecyihpyvdygr<br/> -----</p> <p><b>BLAST:</b> aliSize=35 (resi) iden=11.69% (18/154) simi=22.73% (35/154)<br/> l1dfdil tndgthrnmkllidlknifsrqlpkmpkeyivklvfd-----imltpmqteefrsyltyttkhyaeekvkagtwlpedaq11skqvftdl1prgletp-----HESMVI LKKNKQVIGICFROYKPORFAEVAFLAVTANEQVRG--YGTRLMNKFKDHMOKONIEYLL--TYADN-FAIGYFKKQFT<br/> -----imltpmqteefrsyltyttkhyaeekvkagtwlpedaq11skqvftdl1prgletp-----HHLWSLKLNKEDIVGWLWIHA-EPEHPQOEAFIYDFGLYEPYRKG YAKQALAAALDQAARSMGTRKSLHVFahNQTARKLYEQTGFQETD-----V-----skkl</p> <p>-----tchrmpqekwkgyikdydggtlmecyihpyvdygr<br/> qtdvmskkl-----</p> <p><b>Proposed:</b> aliSize=128 (resi) RMSD=2.08 (Å)<br/> LDFDILtndgthrNMKLLIDLKNI FSROL-PKM-----P--KEYIVKLV--F--DR--ESMVI LK--NKQVIGICFROYKP-O-RFAEVAFLAVTANEQVRG YGTRLMNKFKDHMOKONIEYLLTYADN-F--AIGYFKKQFTKEHrmpqekwkgyikdydGGTLMECYIhpyvdygr<br/> -TLMTPM-----QTEEFRSYLTYTTKHYAEKvkagtwlpedaq11SKQVFTDLPrgLETPHHLWSLKLNKED-I-VGWLWIHAEPHPQOEAFIYDFGLYEPYRKG YAKQALAAALDQAARSMGTRKSLHVFahNqtARKLYEQTGFQETD-----TDVMVSKKL-----</p>     |

|     |                                                                   |   |       |                                                                                                                                                                                                                                                                                                                                                                                                                                                                                                                                                                                                                                                                                                                                                                                                                                                                                                                                                                                                                                                                                                                                                                                                                                                                                                                                                                                                                                                                                                                                                                                                                                                                                                                                                                                                                                                                                 |
|-----|-------------------------------------------------------------------|---|-------|---------------------------------------------------------------------------------------------------------------------------------------------------------------------------------------------------------------------------------------------------------------------------------------------------------------------------------------------------------------------------------------------------------------------------------------------------------------------------------------------------------------------------------------------------------------------------------------------------------------------------------------------------------------------------------------------------------------------------------------------------------------------------------------------------------------------------------------------------------------------------------------------------------------------------------------------------------------------------------------------------------------------------------------------------------------------------------------------------------------------------------------------------------------------------------------------------------------------------------------------------------------------------------------------------------------------------------------------------------------------------------------------------------------------------------------------------------------------------------------------------------------------------------------------------------------------------------------------------------------------------------------------------------------------------------------------------------------------------------------------------------------------------------------------------------------------------------------------------------------------------------|
| 375 | <p><b>1m1dA</b><br/>(163)</p> <hr/> <p><b>1vkcA</b><br/>(149)</p> | C | 12.08 | <p><b>TM-align:</b> aliSize=126 (resi) RMSD=2.64 (Å)<br/> LLDFDILtndgthrnmkLLIDLKNTFSRQLP-KM-----P---K---YTVKLVFDRH-EESMVIKKNKOKVIGICFROYK----PORFAEVAFLAVTANEQVRVYTRMNFKDHMOKONIEYLLTYADNFAI--GYFKKOGFTKEhrmpqekwkgyik-DYDggtlmecyihpyvdygr---<br/> EYTIVDGE-----E--YTEEIKLDREISYSFVrfpisyeeYeerHELFESLSQGEKFFVA--NERSELLCHVWICITLdtvdYVkiYIYDIEVVKWARGLIGSALLRKAEEWAKERGAKKIVLRVEIDNpAVKWEERQYKARA-----IIME-----kpi</p> <p><b>SARST:</b> aliSize=120 (resi) RMSD=4.22 (Å)<br/> llidf-DILTNDgthrnmkLLIDLKNTFSRQLP-KM-----P---K---YTVKLVFDRH-EESMVIKKNKOKVIGICFROYK--KPORF--EVAFLAVTANEQVRVYTRMNFKDHMOKONIEYLLTYADNFAI--GYFKKOGFT-----kehrmpqekwkgyikdydggtlmecyihpyvdygr<br/> -----eYTIVDG-----EYIIEEIKLDREISYSFVrfpisyeeYeerHELFESLSQGEKFFVA--NERSELLCHVWICITLdtvdYVkiYIYDIEVVKWARGLIGSALLRKAEEWAKERGAKKIVLRVEIDNpAVKWEERQYKAralimekpi-----</p> <p><b>BLAST:</b> aliSize=52 (resi) iden=14.77% (22/149) simi=34.90% (52/149)<br/> lldfdilndgthrnmkllidknlfsrqlpkmp-----K---YTVKLVFDRH-EESMVIKKNKOKVIG--ICFRqYKPORFAEVAFLAVTANEQVRV--YTRMNFKDHMOKONIE--YLLTYADNFAI--GYFKKOGFTKEHRMPOEK--wkgyi<br/> -----eytivdgeeyieeikkldreisysfvrfpisyeeYeerHELFESLSQGEKFFVA--NERSELLCHVWICIT-LDTVDYVkiYIYdIEVVKWARGLIGSALLRKAEEWAKERGAKKIVLRVEIDNpAVKWEERQYK--KARALIMEKpi-----</p> <p><b>Proposed:</b> aliSize=128 (resi) RMSD=2.10 (Å)<br/> LLDFDILtndgthrnmkLLIDLKNTFSRQLP-KM-----P---K---YTVKLVFDRH-EESMVIKKNKOKVIGICFROYK----ORFAEVAFLAVTANEQVRVYTRMNFKDHMOKONIEYLLTYADNFAI--GYFKKOGFTKEhrmpqekwkgyikdydggtlmecyihpyvdygr<br/> EYTIVDGE-----E--YTEEIKLDREISYSFVrfpisyeeYeerHELFESLSQGEKFFVA--NERSELLCHVWICIT-LdtvdYVkiYIYDIEVVKWARGLIGSALLRKAEEWAKERGAKKIVLRVEIDNpAVKWEERQYK-----RALIMEKPI-----</p>                                                                                                                                                                                     |
| 376 | <p><b>1m1dA</b><br/>(163)</p> <hr/> <p><b>2vxkA</b><br/>(165)</p> | C | 10.43 | <p><b>TM-align:</b> aliSize=125 (resi) RMSD=3.21 (Å)<br/> -----LLDFDIltndgthrnmkLLI-DLKNIFSRQlpkMPKEYI---VKI--VF-DR--H---HESMVIKKNKOKVIGICFROYK----ORFAEVAFLAVTANEQVRVYTRMNFKDHMOKONIEYLLTYADNFAI--GYFKKOGFTKEhrmpqekwkgyi-IKDYDggtlm<br/> entplfspslispdvlavlpadytirp-----CRSDYKrgYLDVLR-V---TTVGDineeqwnsryewIraRsdEYLLVCDGEGRIVGTGSLVVERKfihslgmVGHIEDIAVEKGOQGKKLRLRIQALDYVAEIVGCYKTLDCSEANEIFYICCFKRA-----IEMAHY-----<br/> ecyihpyvdygr-</p> <p><b>SARST:</b> aliSize=93 (resi) RMSD=13.94 (Å)<br/> lldfdilndgthrnm-----KLLIDLKNTFSRQLPK-----MPKeyivklVDRHHESMVILK----NKQkviGICFROYKpqrEevaflavTANEQVRVYTRMNFKDHMOKONIEYLLTYADNFAI--GYFKKOGFT<br/> -----entplfspslispdvlavlpadytirplcrsdykrGYldvrlvtvtdineEQWNSRYEWIARSDeYllvvCDG-----EGRIVGTGSLVVERKfihslgmVGHIEDIAVEKGOQGKKLRLRIQALDYVAEIVGCYKTLDCSEANEIFYICCFKRA-----<br/> -----k-----kehrmpqekwkgyikdydggtlmecyihpyvdygr<br/> rAglemahy-----</p> <p><b>BLAST:</b> aliSize=11 (resi) iden=3.07% (5/163) simi=6.75% (11/163)<br/> lldfdilndgthrnmkllidknlfsrqlpkmpkeyivklvdrhhesmviiknkqkvigg-----ICFROYK--ORFAEVAFLAVTANE-----<br/> -----entplfspslispdvlavlpadytirpLRSDYK--RGYLDVLRVLTTVGDineeqwnsryewIraRsdEYLLVCDGEGRIVGTGSLVVERKfihslgmVGHIEDIAVEKGOQGKKLRLRIQALDYVAEIVGCYKTLDCSEANEIFYICCFKRA-----<br/> -----qvrngytrlmnkfdhmokqnieylltyadnfaigyfkkqgftk-----kehrmpqekwkgyikdydggtlmecyihpyvdygr<br/> vaekvcyktildceanegfyicgfkraAglemahy-----</p> <p><b>Proposed:</b> aliSize=120 (resi) RMSD=1.92 (Å)<br/> -----LLDFDIltndgthrnmkLLI--DLKNIFSRQlpkMPKE-----yivklvF--DR--H---HESMVIKKNKOKVIGICFROYK----ORFAEVAFLAVTANEQVRVYTRMNFKDHMOKONIEYLLTYADNFAI--GYFKKOGFTKEhrmpqekwkgyikdy<br/> entplfspslispdvlavlpadytirp-----CRSD-YkrGYLDVLR-V---TTVGDineeqwns-----RyeWIRaRsdEYLLVCDGEGRIVGTGSLVVERKfihslgmVGHIEDIAVEKGOQGKKLRLRIQALDYVAEIVGCYKTLDCSEANEIFYICCFKRA-----<br/> AgTLMECYI-hpyvdygr<br/> --LEMAHYc-----</p> |
| 377 | <p><b>1mk4A</b><br/>(157)</p> <hr/> <p><b>1s3zB</b><br/>(145)</p> | C | 20.69 | <p><b>TM-align:</b> aliSize=130 (resi) RMSD=2.46 (Å)<br/> hMDIRITITSSDYEMVTSVLNWWggrQLKEK---L--PR-LFFEFHQDTSFTTSEHNSMTGFLIGFQSQS-----DPeTAYIHFSGHPDFRKMQIGKQLYDVFIE TVKQRCGTRVKCVTSFVNKVS IAYITKLGFDIEKgtktvngisVFAnYDGPgqdrvlfvkni--<br/> -MDIRQMNKTHLEHWRGLRK-QL---WPGHPddaHlAdGeEILQADHLASFIAMADGVAIGFADASIRHDyngcdsSP-VVLEGIFVLSFRQRGVAKQLIAAVQRWGNTKCGREMASDTSPEENTISQKVQALGHEETE-----RVI-FYRK-----rc</p> <p><b>SARST:</b> aliSize=125 (resi) RMSD=4.50 (Å)<br/> hm-DIRITITSSDYEMVTSVLNWWggrQLKEK---L--PR-LFFEFHQDTSFTTSEHNSMTGFLIGFQSQS-----SDPETAYIHFSGHPDFRKMQIGKQLYDVFIE TVKQRCGTRVKCVTSFVNKVS IAYITKLGFDIEKGTktvngisvfanYdgpqdrvlfvkni<br/> --mDIRQMNKTHLEHWRGLRKQLPQH-----PDDAHLADGeeilqaHLASFIAMADGVAIGFADASIRHDyngcdsSPVVLEGIFVLSFRQRGVAKQLIAAVQRWGNTKCGREMASDTSPEENTISQKVQALGHEETE-----ERVIFyrkrc-----</p> <p><b>BLAST:</b> aliSize=53 (resi) iden=24.14% (35/145) simi=36.55% (53/145)<br/> hMDIRITITSSDYEMVTSVLNWWggrQLKEK---L--PR-LFFEFHQDTSFTTSEHNSMTGFLIGFQSQS-----SDPETAYIHFSGHPDFRKMQIGKQLYDVFIE TVKQRCGTRVKCVTSFVNKVS IAYITKLGFDIEKGTktvngisvfanYdgpqdrvlfvkni<br/> -MDIRQMNKTHLEHWRGLRKQLPQHddaHlADGEEILQADHL--ASFIAMADGVAIGFADASIRHDyngcdsSPVVLEGIFVLSFRQRGVAKQLIAAVQRWGNTKCGREMASDTSPEENTISQKVQALGHEETE-----ERVIFyrkrc-----</p> <p><b>Proposed:</b> aliSize=130 (resi) RMSD=2.01 (Å)<br/> hMDIRITITSSDYEMVTSVLNWWggrQLKEK---L--PR-LFFEFHQDTSFTTSEHNSMTGFLIGFQSQS-----DPeTAYIHFSGHPDFRKMQIGKQLYDVFIE TVKQRCGTRVKCVTSFVNKVS IAYITKLGFDIEKgtktvngisvfanYdgpqdrvlfvkni--<br/> -MDIRQMNKTHLEHWRGLRK-QL---WPGHPddaHlAdGeEILQAdhLA--SFIAMADGVAIGFADASIRHDyngcdsSP-VVLEGIFVLSFRQRGVAKQLIAAVQRWGNTKCGREMASDTSPEENTISQKVQALGHEETE-----ERVIFyrkrc</p>                                                                                                                                                                                                             |

|     |                                             |   |       |                                                                                                                                                                                                                                                                                                                                                                                                                                                                                                                                                                                                                                                                                                                                                                                                                                                                                                                                                                                                                                                                                                                                                                                                                                                                                                                                                                                                                                                                                                                                                                                                                                                                                                                            |
|-----|---------------------------------------------|---|-------|----------------------------------------------------------------------------------------------------------------------------------------------------------------------------------------------------------------------------------------------------------------------------------------------------------------------------------------------------------------------------------------------------------------------------------------------------------------------------------------------------------------------------------------------------------------------------------------------------------------------------------------------------------------------------------------------------------------------------------------------------------------------------------------------------------------------------------------------------------------------------------------------------------------------------------------------------------------------------------------------------------------------------------------------------------------------------------------------------------------------------------------------------------------------------------------------------------------------------------------------------------------------------------------------------------------------------------------------------------------------------------------------------------------------------------------------------------------------------------------------------------------------------------------------------------------------------------------------------------------------------------------------------------------------------------------------------------------------------|
| 378 | <p>1mk4A (157)</p> <hr/> <p>1s5kA (153)</p> | C | 19.61 | <p><b>TM-align:</b> aliSize=132 (resi) RMSD=2.63 (Å)<br/> -----HMDIRITITSSDYEMVTSVNLNWWggrQLKE---KL--PR-LFFEHFQDTSFITSEHNSMTGFLIGFQSOSD-----PETAYIHFSGVHPDFRKMQIGKQLYDVF IETVKORGC TRVKCVTSPVNVKVS IAYHTKLGFDIEKgtktvngisVFAnydgpqdrvlfvkni--<br/> glvprgsHMDIRQMNKTHLHWRGLRK-QL---WPGHpdDAHlaDGeEILQADHLASFIAMADGVAIGFADASIRHDYvngcdsSPVVFLEGIFVLPSEFRQGVAKOLIAAVQRWGTNKGCREMASDTSPEVTISQKVQALGFEEET-----RVI-FYRK-----rc</p> <p><b>SARST:</b> aliSize=130 (resi) RMSD=5.69 (Å)<br/> h-----MDIRITITSSDYEMVTSVNLNWWggrQLKEKlRRLFFEHFQD-----TSFITSE--HNSMTGFLIGFQSQ-----SDPETAYIHFSGVHPDFRKMQIGKQLYDVF IETVKORGC TRVKCVTSPVNVKVS IAYHTKLGFDIEKGTkTVnGISVFA-nydgpqdrvlfvkni<br/> -glvprgshMDIRQMNKTHLHWRGLRKQLPCH-----PDDAHLADGEEilqadHLASFIAMADGVAIGFADASIRHDYvngcdsSPVVFLEGIFVLPSEFRQGVAKOLIAAVQRWGTNKGCREMASDTSPEVTISQKVQALGF---EETERV-IFYRKrc-----</p> <p><b>BLAST:</b> aliSize=54 (resi) iden=23.53% (36/153) simi=35.29% (54/153)<br/> -----HMDIRITITSSDYEMVTSVNLNWWggrQLKEKlRRLFFEHFQDTSFITSEHNSMTGFLIGFQSOSDPETAYIHFSGVHPDFRKMQIGKQLYDVF IETVKORGC TRVKCVTSPVNVKVS IAYHTKLGFD-----iekgtktvngisvfanydgpqdrvlfvkni<br/> glvprgsHMDIRQMNKTHLHWRGLRKQLPCHpdDAHLADGEEILQADHLA--ASFIAMADGVAIGFAdasIRHDYVNGDSSPVVIEGIFVLPSEFRQGVAKOLIAAVQRWGTNKGCREMASDTSPEVTISQKVQALGFEEETervifykrcc-----</p> <p><b>Proposed:</b> aliSize=128 (resi) RMSD=2.04 (Å)<br/> -----HMDIRITITSSDYEMVTSVNLNWWggrQLKEK---L--PR-LFFEHFQDTSFITSEHNSMTGFLIGFQSOS-----DPeTAYIHFSGVHPDFRKMQIGKQLYDVF IETVKORGC TRVKCVTSPVNVKVS IAYHTKLGFDIEKgtktvngisvfanydgpqdrVLFVKNi---<br/> glvprgsHMDIRQMNKTHLHWRGLRK-QL---WPG-HpdDAHlaDGeEILQADHLA--SFIAMADGVAIGFADASIRHDYvngcdsSP-VVFLEGIFVLPSEFRQGVAKOLIAAVQRWGTNKGCREMASDTSPEVTISQKVQALGFEEET-----RVI-FYRKrc</p> |
| 379 | <p>1mk4A (157)</p> <hr/> <p>lufhA (155)</p> | C | 9.68  | <p><b>TM-align:</b> aliSize=127 (resi) RMSD=3.13 (Å)<br/> HMDIRITITSSDYEMVTSVNLNWWggrQLK-----LP--R-LFFEHFQDTSFITSEHNSMTGFLIGFQSOSDPETAYIHFSGVHPDFRKMQIGKQLYDVF IETVKORGC TRVKCVTSPVNVKVS IAYHTKLGFDIEKgtktvngisVFAnydgpqdrvlfvkni--<br/> TlMLTPMQTEEFRSYLYTt-----KHYAekvkagtwlpedaqllSkqvFTdILPrGLEtPHHLWLSKlNEKDlVGVWlHAEpEHPOQEAfYDFLYEPYRGKYAKALAAALDQAARSMIRKLSLHVFAHQTARKLYEQTGFQET-D-----VVM-----S-----kkl</p> <p><b>SARST:</b> aliSize=109 (resi) RMSD=8.37 (Å)<br/> hmdirtitssd-----YEMVTSVNLNWWGROLKEKlprlffehfQDTSFITSEHNSMTGFLIGFQSOSDPE-TAYIHFSGVHPDFRKMQIGKQLYDVF IETVKORGC TRVKCVTSPVNVKVS IAYHTKLGfdiEKGTKTV----ngisvfanyd<br/> -----imltpmqteefrsyltyttkhyAekvkagtwlpedaqllSKQVFTDLPRLTETPHHH-----WSLKLNEKDlVGVWlHAEPEHPQEAfYDFLYEPYRGKYAKALAAALDQAARSMIRKLSLHVFAHQTARKLYEQT---FQETDVMskkl-----<br/> pgqdrvlfvkni</p> <p><b>BLAST:</b> aliSize=40 (resi) iden=12.90% (20/155) simi=25.81% (40/155)<br/> hmdirtitssdyemvtsvlnnewggrqlkek-----LP--R-LFFEHFQDTSFITSEHNSMTGFLIGFQSOSDPETAYIHFSGVHPDFRKMQIGKQLYDVF IETVKORGC TRVKCVTSPVNVKVS IAYHTKLGfdiEKGTKTV----ngisvfanyd<br/> -----imltpmqteefrsyltyttkhyAekvkagtwlpedaqllSkqvFTdILPrGLEtPHHLWLSKlNEKDlVGVWlHAEPEHPQEAfYDFLYEPYRGKYAKALAAALDQAARSMIRKLSLHVFAHQTARKLYEQTGFQETDVMskkl-----<br/> kgtktvngisvfanydgpqdrvlfvkni</p> <p><b>Proposed:</b> aliSize=125 (resi) RMSD=2.56 (Å)<br/> hm--DIRITITSSDYEMVTSVNLNWWggrQLKE-----LP--RL-LFFEHFQDTSFITSEHNSMTGFLIGFQSOSDPETAYIHFSGVHPDFRKMQIGKQLYDVF IETVKORGC TRVKCVTSPVNVKVS IAYHTKLGfdiEkgtktvngisvfanydgpqdrVLFVKNi<br/> --TlMLTPMQ-TEEFRSYLYTt-----KHYAekvkagtwlpedaqllSkqvFTdILPrGLEtPHH-HLWLSKlNEKDlVGVWlHAEpEHPOQEAfYDFLYEPYRGKYAKALAAALDQAARSMIRKLSLHVFAHQTARKLYEQTGFQET-----DVMskkl</p>             |
| 380 | <p>1mk4A (157)</p> <hr/> <p>lufhB (154)</p> | C | 10.39 | <p><b>TM-align:</b> aliSize=130 (resi) RMSD=3.20 (Å)<br/> HMDIRITITSSDYEMVTSVNLNWWggrQLK-----LP--R-LFFEHFQDTSFITSEHNSMTGFLIGFQSOSDPETAYIHFSGVHPDFRKMQIGKQLYDVF IETVKORGC TRVKCVTSPVNVKVS IAYHTKLGFDIEKgtktvngisVFAnydgpqdrvlfvkni--<br/> -lMLTPMQTEEFRSYLYTtK-H--yAEEvkagtwlpedaqllSkqvFTdILPrGLEtPHHLWLSKlNEKDlVGVWlHAEpEHPOQEAfYDFLYEPYRGKYAKALAAALDQAARSMIRKLSLHVFAHQTARKLYEQTGFQET-D-----V-VM----SK-----kl</p> <p><b>SARST:</b> aliSize=109 (resi) RMSD=8.25 (Å)<br/> hmdirtitssd-----YEMVTSVNLNWWGROLKEKlprlffehfQDTSFITSEHNSMTGFLIGFQSOSDPE-TAYIHFSGVHPDFRKMQIGKQLYDVF IETVKORGC TRVKCVTSPVNVKVS IAYHTKLGfdiEKGTKTV----ngisvfanyd<br/> -----imltpmqteefrsyltyttkhyAekvkagtwlpedaqllSKQVFTDLPRLTETPHHH-----WSLKLNEKDlVGVWlHAEPEHPQEAfYDFLYEPYRGKYAKALAAALDQAARSMIRKLSLHVFAHQTARKLYEQT---FQETDVMskkl-----<br/> pgqdrvlfvkni</p> <p><b>BLAST:</b> aliSize=40 (resi) iden=12.99% (20/154) simi=25.97% (40/154)<br/> hmdirtitssdyemvtsvlnnewggrqlkek-----LP--R-LFFEHFQDTSFITSEHNSMTGFLIGFQSOSDPETAYIHFSGVHPDFRKMQIGKQLYDVF IETVKORGC TRVKCVTSPVNVKVS IAYHTKLGfdiEKGTKTV----ngisvfanyd<br/> -----imltpmqteefrsyltyttkhyAekvkagtwlpedaqllSkqvFTdILPrGLEtPHH-HLWLSKlNEKDlVGVWlHAEPEHPQEAfYDFLYEPYRGKYAKALAAALDQAARSMIRKLSLHVFAHQTARKLYEQTGFQETDVMskkl-----<br/> gtktvngisvfanydgpqdrvlfvkni</p> <p><b>Proposed:</b> aliSize=127 (resi) RMSD=2.51 (Å)<br/> HMDIRITITSSDYEMVTSVNLNWWggrQLK-----LP--R-LFFEHFQDTSFITSEHNSMTGFLIGFQSOSDPETAYIHFSGVHPDFRKMQIGKQLYDVF IETVKORGC TRVKCVTSPVNVKVS IAYHTKLGfdiEkgtktvngisvfanydgpqdrVLFVKNi<br/> -lMLTPMQTEEFRSYLYTtK-----HYAekvkagtwlpedaqllSkqvFTdILPrGLEtPHH-HLWLSKlNEKDlVGVWlHAEpEHPOQEAfYDFLYEPYRGKYAKALAAALDQAARSMIRKLSLHVFAHQTARKLYEQTGFQET-----DVMskkl</p>                     |

|     |                                             |   |       |                                                                                                                                                                                                                                                                                                                                                                                                                                                                                                                                                                                                                                                                                                                                                                                                                                                                                                                                                                                                                                                                                                                                                                                                                                                                                                                                                                                                                                                                                                                                                                                                                                                                                                                                                                                                               |
|-----|---------------------------------------------|---|-------|---------------------------------------------------------------------------------------------------------------------------------------------------------------------------------------------------------------------------------------------------------------------------------------------------------------------------------------------------------------------------------------------------------------------------------------------------------------------------------------------------------------------------------------------------------------------------------------------------------------------------------------------------------------------------------------------------------------------------------------------------------------------------------------------------------------------------------------------------------------------------------------------------------------------------------------------------------------------------------------------------------------------------------------------------------------------------------------------------------------------------------------------------------------------------------------------------------------------------------------------------------------------------------------------------------------------------------------------------------------------------------------------------------------------------------------------------------------------------------------------------------------------------------------------------------------------------------------------------------------------------------------------------------------------------------------------------------------------------------------------------------------------------------------------------------------|
| 381 | <p>1mk4A (157)</p> <hr/> <p>1z4eA (150)</p> | C | 18.67 | <p><b>TM-align:</b> aliSize=134 (resi) RMSD=2.82 (Å)<br/> HMDIRTISSYEMVTSVLNEwGGROLKEK-----L--PR-LFFEHFODTSFITSEHNSMTGFLIGFQSQSD---PETAYIHFSGVHPDFRKMQIGKOLYDVFIEETVKORGCTRVKCVTSPVNKVSIAHYHTKLGFDI EKgktvngisvFanYDGPgqdrvlfvkni-<br/> VVTIREATEGLEQMVHMLAD-DVLGRKRERYekplpvsYvrAFKEIKKDKNNELIVACNGEEIVGMLQVTFTPYLtyqgSWRRTIEGVRTISAAARGGIGSOLVCWATERAKERGCHLIQLTTDKORPDALRFYEQLGFKASH-----EG--LKM-----f</p> <p><b>SARST:</b> aliSize=129 (resi) RMSD=6.83 (Å)<br/> h-MDIRTISSYEMV-----TSLVNEWGGROLKEKLPRLFFEHFO-----DTSFITS--EHSMTGFLIGFQSQSDPETAYIHFS--GVHPDFRKMQIGKOLYDVFIEETVKORGCTRVKCVTSPVNKVSIAHYHTKLGFDi EKgktvngisvfanydgpqdrvlfvkni--i<br/> -hVTIREATEGLEQMVHMLAD-DVLGRKRERYEKPL-----VSVYVRAFKKIKKDKNNELIVACNGEEIVGMLQVTFTPYLTYQGSWRATIEGVRTISAAARGGIGSOLVCWATERAKERGCHLIQLTTDKORPDALRFYEQLGFKASH-----EG--LKM-----EGLKMHf-</p> <p><b>BLAST:</b> aliSize=63 (resi) iden=26.67% (40/150) simi=42.00% (63/150)<br/> HMDIRTISSYEMVTSVLNEwGGROLKEK-----L--PR-LFFEHFODTSFITSEHNSMTGFLIGFQSQSDPETAYIHFSGVHPDFRKMQIGKOLYDVFIEETVKORGCTRVKCVTSPVNKVSIAHYHTKLGFDI EKGTK---tvngisvfanydgpqdrvlfvkni<br/> VVTIREATEGLEQMVHMLAD-DVLGRKRERYEKPL-----VSVYVRAFKKIKKDKNNELIVACNGEEIVGMLQVTFTPYLTYQGSWRATIEGVRTISAAARGGIGSOLVCWATERAKERGCHLIQLTTDKORPDALRFYEQLGFKASHHEGLKMHf-----</p> <p><b>Proposed:</b> aliSize=131 (resi) RMSD=2.26 (Å)<br/> HMDIRTISSYEMVTSVLNEwGGROLKEK-----L--PR-LFFEHFODTSFITSEHNSMTGFLIGFQSQSD---PETAYIHFSGVHPDFRKMQIGKOLYDVFIEETVKORGCTRVKCVTSPVNKVSIAHYHTKLGFDI EKgktvngisvfanydgpqdrvlfvkni<br/> VVTIREATEGLEQMVHMLAD-DVLGRKRERYekplpvsYvrAFKEIKKDKNNELIVACNGEEIVGMLQVTFTPYLtyqgSWRRTIEGVRTISAAARGGIGSOLVCWATERAKERGCHLIQLTTDKORPDALRFYEQLGFKASH-----EG--LKM-----HEGLKMHf-</p>                                                                                                            |
| 382 | <p>1mk4A (157)</p> <hr/> <p>2d4pA (130)</p> | C | 13.85 | <p><b>TM-align:</b> aliSize=122 (resi) RMSD=2.61 (Å)<br/> hMDIRTISSYEMVTSVLNEwGGROLKEKLPRLFFEHFO-----DTSFITSEHNSMTGFLIGFQSQSD---PETAYIHFSGVHPDFRKMQIGKOLYDVFIEETVKORGCTRVKCVTSPVNKVSIAHYHTKLGFDI EKgktvngisvFanYDGPgqdrvlfvkni--<br/> -mRFRPFTEELDRNLRLAG-----K--RPVSLGALRFfARTGHSEFLAEEGEPMGALAQAQVWQgeATVTVTRIEGR-----SVEALRGILRAVVKSAAYDAVYVEVALHLD-PERKELEEALKAEGFAIGPLV-----LA--VRVLG-----sr</p> <p><b>SARST:</b> aliSize=125 (resi) RMSD=4.02 (Å)<br/> hm-DIRTISSYEMVTSVLNEwGGROLKEKLPRLFFEHFO-----DTSFITSEHNSMTGFLIGFQSQSDPETAYIHFSGVHPDFRKMQIGKOLYDVFIEETVKORGCTRVKCVTSPVNKVSIAHYHTKLGFDi EKgktvngisvfanYDGP-gqdrvlfvkni<br/> --mRFRPFTEELDRNLRLAG-----K--RPVSLGALRFfARTGHSEFLAEEGEPMGALAQAQVWQgeATVTVTRIEGR-----RS--VEALRGILRAVVKSAAYDAVYVEVALHLD-PERKELEEALKAEGFAIGPLV-----LAVR--LGSr-----</p> <p><b>BLAST:</b> aliSize=20 (resi) iden=12.31% (16/130) simi=15.38% (20/130)<br/> hMDIRTISSYEMVTSVLNEwGGROLKEKLPRLFFEHFO-----DTSFITSEHNSMTGFLIGFQSQSDPETAYIHFSGVHPDFRKMQIGKOLYDVFIEETVKORGCTRVKCVTSPVNKVSIAHYHTKLGFDI EKgktvngisvfanYDGP-gqdrvlfvkni<br/> -mRFRPFTEELDRNLRLAG-----K--RPVSLGALRFfARTGHSEFLAEEGEPMGALAQAQVWQgeATVTVTRIEGR-----RS--VEALRGILRAVVKSAAYDAVYVEVALHLD-PERKELEEALKAEGFAIGPLV-----LAVR--LGSr-----</p> <p>vnkvsiahyhtklgfdiekgtktvngisvfanydgpqdrvlfvkni</p> <p><b>Proposed:</b> aliSize=122 (resi) RMSD=2.25 (Å)<br/> hMDIRTISSYEMVTSVLNEwGGROLKEKLPRLFFEHFO-----DTSFITSEHNSMTGFLIGFQSQSD---PETAYIHFSGVHPDFRKMQIGKOLYDVFIEETVKORGCTRVKCVTSPVNKVSIAHYHTKLGFDI EKgktvngisvfanYDGP-gqdrvlfvkni<br/> -mRFRPFTEELDRNLRLAG-----K--RPVSLGALRFfARTGHSEFLAEEGEPMGALAQAQVWQgeATVTVTRIEGR-----SVEALRGILRAVVKSAAYDAVYVEVALHLD-PERKELEEALKAEGFAIGPLV-----LV--LA-----VRVLGSR</p>                                                                                                             |
| 383 | <p>1mk4A (157)</p> <hr/> <p>2g3tA (169)</p> | C | 13.38 | <p><b>TM-align:</b> aliSize=134 (resi) RMSD=2.85 (Å)<br/> HMDIRTISSYEMVTSVLNEwGGROLKEKLPRLFFEHFO-----DTSFITSEHNSMTGFLIGFQSQSD---PETAYIHFSGVHPDFRKMQIGKOLYDVFIEETVKORGCTRVKCVTSPVNKVSIAHYHTKLGFDI EKgktvngisvFanYDGPgqdrvlfvkni-----<br/> KFVIRPATAAACSDILRLIKELAKYEMEEOVILTEKDLLEDGfGehpFYHCLVAEVPKehwtpghSIVGAMYYFTY-pwiGKLLYLEDFFMSSYRGGFGLSEILKNLSQVAMRCRSSMHFLVAEWNEPSINFYKRRASDLSsEEG-----WR-LFKI-----dkeyllkmatee</p> <p><b>SARST:</b> aliSize=124 (resi) RMSD=4.62 (Å)<br/> h-MDIRTISSYEMVTSVLNEwGGROLKEKLPRLFFEHFO-----DTSFITSEHNSMTGFLIGFQSQSDPETAYIHFSGVHPDFRKMQIGKOLYDVFIEETVKORGCTRVKCVTSPVNKVSIAHYHTKLGFDI EKgktvngisvfanydgpqdrvlfvkni<br/> -kFVIRPATAAACSDILRLIKELAKYEMEEOVILTEKDLLEDGfGehpFYHCLVAEVPKehwtpghSIVGAMYYFTY-pwiGKLLYLEDFFMSSYRGGFGLSEILKNLSQVAMRCRSSMHFLVAEWNEPSINFYKRRASDLSsEEGwrlfkidkeyllkmatee-----</p> <p>pgqdrvlfvkni</p> <p><b>BLAST:</b> aliSize=36 (resi) iden=10.83% (17/157) simi=22.93% (36/157)<br/> hmdirtitssyemvtsvlnewggrolkeklprlffehfodtsfi-----SMTGFLIGFQSQSDPETAYIHFSGVHPDFRKMQIGKOLYDVFIEETVKORGCTRVKCVTSPVNKVSIAHYHTKLGFDI EKgktvngisvfanYDGP-gqdrvlfvkni<br/> -----kfvirpataadcsdilrlikelakyeemeoqviltekdllledgfgehpfyhclvaevpkehwpghSIVGAMYYFTY-pwiGKLLYLEDFFMSSYRGGFGLSEILKNLSQVAMRCRSSMHFLVAEWNEPSINFYKRRASDLSsEEGwrlfkidkeyllkmatee-----</p> <p>L-----fdiekgtktvngisvfanydgpqdrvlfvkni<br/> R-----saseegwrlfkidkeyllkmatee-----</p> <p><b>Proposed:</b> aliSize=137 (resi) RMSD=2.50 (Å)<br/> HMDIRTISSYEMVTSVLNEwGGROLKEKLPRLFFEHFO-----DTSFITSEHNSMTGFLIGFQSQSD---PETAYIHFSGVHPDFRKMQIGKOLYDVFIEETVKORGCTRVKCVTSPVNKVSIAHYHTKLGFDI EKgktvngisvfanYDGP-gqdrvlfvkni<br/> KFVIRPATAAACSDILRLIKELAKYEMEEOVILTEKDLLEDGfGehpFYHCLVAEVPKehwtpghSIVGAMYYFTY-pwiGKLLYLEDFFMSSYRGGFGLSEILKNLSQVAMRCRSSMHFLVAEWNEPSINFYKRRASDLSsEEGwrlfkidkeyllkmatee-----</p> |



|     |                                                                   |   |       |                                                                                                                                                                                                                                                                                                                                                                                                                                                                                                                                                                                                                                                                                                                                                                                                                                                                                                                                                                                                                                                                                                                                                                                                                                                                                                                                                                                                                                                                                                                                                                                                                                                                                                                                                                                                                                                                                                                                                                                 |
|-----|-------------------------------------------------------------------|---|-------|---------------------------------------------------------------------------------------------------------------------------------------------------------------------------------------------------------------------------------------------------------------------------------------------------------------------------------------------------------------------------------------------------------------------------------------------------------------------------------------------------------------------------------------------------------------------------------------------------------------------------------------------------------------------------------------------------------------------------------------------------------------------------------------------------------------------------------------------------------------------------------------------------------------------------------------------------------------------------------------------------------------------------------------------------------------------------------------------------------------------------------------------------------------------------------------------------------------------------------------------------------------------------------------------------------------------------------------------------------------------------------------------------------------------------------------------------------------------------------------------------------------------------------------------------------------------------------------------------------------------------------------------------------------------------------------------------------------------------------------------------------------------------------------------------------------------------------------------------------------------------------------------------------------------------------------------------------------------------------|
| 384 | <p><b>1mk4A</b><br/>(157)</p> <hr/> <p><b>2jevA</b><br/>(169)</p> | C | 13.38 | <p><b>TM-align:</b> aliSize=135 (resi) RMSD=2.97 (Å)<br/>       -HMDIRITITSSDYEMVTSVLNFW-WGGROLKEK1pRLFFEHFQDTSFITSEHN-----SMTGFLIGFOSQSD---PETAYIHFGSHHPDFRKMQIGKOLYDVFIEITVKORGCITRVKCVTSPVNVKVSIAVHTKLGFDIE--KGTktvngisvFAnYDGPgqdrvlfvkni-----<br/>       akFVLRPATAAACSDILRLRLIKELAKYEYEMEEQVILTEKDLLEDGFgehPfyHCLVAEVPKehwtpeghSIVGFIAMYYFTY-ypwiGKLLYLEDFFVMSDYRGGIGSEILKLNLSQVAMRCRCSSMHFLVAEWEPSINFYKRRASDLSsEEG-----WR-LFKI-----dkeyllkmate</p> <p><b>SARST:</b> aliSize=124 (resi) RMSD=4.49 (Å)<br/>       h--MDIRITITSSDYEMVTSVLNFW-WGGROLKEK1pRLFFEHFQDTSFITSEHN-----SMTGFLIGFOSQSD---PETAYIHFGSHHPDFRKMQIGKOLYDVFIEITVKORGCITRVKCVTSPVNVKVSIAVHTKLGFDIE-----ekgtktvngisvfyanydg<br/>       -akFVLRPATAAACSDILRLRLIKELAKYEYEMEEQVILTEKDLLEDGFgehPfyHCLVAEVPKehwtpeghSIVGFIAMYYFTY-ypwiGKLLYLEDFFVMSDYRGGIGSEILKLNLSQVAMRCRCSSMHFLVAEWEPSINFYKRRASDLSsEEGwrlfkidkeyllkmate-----<br/>       pgqdrvlfvkni</p> <p><b>BLAST:</b> aliSize=36 (resi) iden=10.83% (17/157) simi=22.93% (36/157)<br/>       hmdirtitssdyemvtsvlnewggrlkeklprlffehfqtstfi-----SMTGFLIGFOSQSD---PETAYIHFGSHHPDFRKMQIGKOLYDVFIEITVKORGCITRVKCVTSPVNVKVSIAVHTKLGFDIE-----ekgtktvngisvfyanydgpgqdrvlfvkni<br/>       -----akfvirpataadcsdilrlikelakyeymeeqviltedkllledgfgehpfyhclvaevpkehwtpeghsivgfiamyyftypwiGKLLYLEDFFVMSDYRGGIGSEILKLNLSQVAMRCRCSSMHFLVAEWEPSINFYKRRASDLSsEEGwrlfkidkeyllkmate-----<br/>       KL-----fdi ekgtktvngisvfyanydgpgqdrvlfvkni<br/>       RRasdl sseegwrlfkidkeyllkmate-----</p> <p><b>Proposed:</b> aliSize=129 (resi) RMSD=2.23 (Å)<br/>       -HMDIRITITSSDYEMVTSVLNFW-WGGROLKEK1pRLFFEHFQDTSFITSEHN-----SMTGFLIGFOSQSD---PETAYIHFGSHHPDFRKMQIGKOLYDVFIEITVKORGCITRVKCVTSPVNVKVSIAVHTKLGFDIE--KGTktvngisvfyanydgpgqdrvlfvkni--<br/>       akFVLRPATAAACSDILRLRLIKELAKYEYEMEEQVILTEKDLLEDGFgehPfyHCLVAEVPKehwtpeghSIVGFIAMYYFTY-ypwiGKLLYLEDFFVMSDYRGGIGSEILKLNLSQVAMRCRCSSMHFLVAEWEPSINFYKRRASDLSsEEG-----WR-LFKIDKey<br/>       -----<br/>       llkmate</p> |
| 385 | <p><b>1mk4A</b><br/>(157)</p> <hr/> <p><b>2vbqA</b><br/>(147)</p> | C | 20.41 | <p><b>TM-align:</b> aliSize=132 (resi) RMSD=2.75 (Å)<br/>       -HMDIRITITSSDYEMVTSVLNFW-WGGROLKEK1pRLFFEHFQDTSFITSEHN-----SMTGFLIGFOSQSD---PETAYIHFGSHHPDFRKMQIGKOLYDVFIEITVKORGCITRVKCVTSPVNVKVSIAVHTKLGFDIEKgtktvngisvFANYdGPgqdrvlfvkni--<br/>       sHMDIRQMNKTHLHWRGLRKQLPCHPDDAHLADGEEILQADHLASFAMADGVAIGFADASIRHdyvngcdsSPVVVLEGFIFLPSFRQGVAKOLIAAVQVWGTNKGCREMASDTSPEENTISQKVQALGFEETE-----RVIFYRK-----rc</p> <p><b>SARST:</b> aliSize=126 (resi) RMSD=4.47 (Å)<br/>       h--MDIRITITSSDYEMVTSVLNFW-WGGROLKEK1pRLFFEHFQDTSFITSEHN-----SMTGFLIGFOSQSD---PETAYIHFGSHHPDFRKMQIGKOLYDVFIEITVKORGCITRVKCVTSPVNVKVSIAVHTKLGFDIEKGTktvngisvfyanydgpgqdrvlfvkni<br/>       -shMDIRQMNKTHLHWRGLRKQLPCHPDDAHLADGEEILQADHLASFAMADGVAIGFADASIRHdyvngcdsSPVVVLEGFIFLPSFRQGVAKOLIAAVQVWGTNKGCREMASDTSPEENTISQKVQALGFEETE-----RVIFYRKrc-----</p> <p><b>BLAST:</b> aliSize=54 (resi) iden=24.49% (36/147) simi=36.73% (54/147)<br/>       -HMDIRITITSSDYEMVTSVLNFW-WGGROLKEK1pRLFFEHFQDTSFITSEHN-----SMTGFLIGFOSQSD---PETAYIHFGSHHPDFRKMQIGKOLYDVFIEITVKORGCITRVKCVTSPVNVKVSIAVHTKLGFDIE-----iekgktktvngisvfyanydgpgqdrvlfvkni<br/>       sHMDIRQMNKTHLHWRGLRKQLPCHPDDAHLADGEEILQADHLASFAMADGVAIGFADASIRHdyvngcdsSPVVVLEGFIFLPSFRQGVAKOLIAAVQVWGTNKGCREMASDTSPEENTISQKVQALGFEETE-----RVIFYRKrc-----</p> <p><b>Proposed:</b> aliSize=128 (resi) RMSD=2.16 (Å)<br/>       -HMDIRITITSSDYEMVTSVLNFW-WGGROLKEK1pRLFFEHFQDTSFITSEHN-----SMTGFLIGFOSQSD---PETAYIHFGSHHPDFRKMQIGKOLYDVFIEITVKORGCITRVKCVTSPVNVKVSIAVHTKLGFDIEKgtktvngisvfyanydgpgqdrvlfvkni--<br/>       sHMDIRQMNKTHLHWRGLRKQLPCHPDDAHLADGEEILQADHLASFAMADGVAIGFADASIRHdyvngcdsSPVVVLEGFIFLPSFRQGVAKOLIAAVQVWGTNKGCREMASDTSPEENTISQKVQALGFEETE-----RVIFYRKrc-----</p>                                                                                                                                                                                                                                                       |
| 386 | <p><b>1mk4A</b><br/>(157)</p> <hr/> <p><b>2vbqB</b><br/>(144)</p> | C | 19.44 | <p><b>TM-align:</b> aliSize=130 (resi) RMSD=2.58 (Å)<br/>       hmdirtitssdyemvtsvlnfw-wggrolkek1pRLFFEHFQDTSFITSEHN-----SMTGFLIGFOSQSD---PETAYIHFGSHHPDFRKMQIGKOLYDVFIEITVKORGCITRVKCVTSPVNVKVSIAVHTKLGFDIEKgtktvngisvFAnYDGPgqdrvlfvkni--<br/>       --DIRQMNKTHLHWRGLRKQLPCHPDDAHLADGEEILQADHLASFAMADGVAIGFADASIRHdyvngcdsSPVVVLEGFIFLPSFRQGVAKOLIAAVQVWGTNKGCREMASDTSPEENTISQKVQALGFEETE-----RVIFYRK-----rc</p> <p><b>SARST:</b> aliSize=127 (resi) RMSD=4.44 (Å)<br/>       hmdirtitssdyemvtsvlnfw-wggrolkek1pRLFFEHFQDTSFITSEHN-----SMTGFLIGFOSQSD---PETAYIHFGSHHPDFRKMQIGKOLYDVFIEITVKORGCITRVKCVTSPVNVKVSIAVHTKLGFDIEKGTktvngisvfyanydgpgqdrvlfvkni<br/>       ---DIRQMNKTHLHWRGLRKQLPCHPDDAHLADGEEILQADHLASFAMADGVAIGFADASIRHdyvngcdsSPVVVLEGFIFLPSFRQGVAKOLIAAVQVWGTNKGCREMASDTSPEENTISQKVQALGFEETE-----RVIFYRKrc-----</p> <p><b>BLAST:</b> aliSize=52 (resi) iden=23.61% (34/144) simi=36.11% (52/144)<br/>       hmdirtitssdyemvtsvlnfw-wggrolkek1pRLFFEHFQDTSFITSEHN-----SMTGFLIGFOSQSD---PETAYIHFGSHHPDFRKMQIGKOLYDVFIEITVKORGCITRVKCVTSPVNVKVSIAVHTKLGFDIE-----iekgktktvngisvfyanydgpgqdrvlfvkni<br/>       --DIRQMNKTHLHWRGLRKQLPCHPDDAHLADGEEILQADHLASFAMADGVAIGFADASIRHdyvngcdsSPVVVLEGFIFLPSFRQGVAKOLIAAVQVWGTNKGCREMASDTSPEENTISQKVQALGFEETE-----RVIFYRKrc-----</p> <p><b>Proposed:</b> aliSize=127 (resi) RMSD=2.09 (Å)<br/>       hmdirtitssdyemvtsvlnfw-wggrolkek1pRLFFEHFQDTSFITSEHN-----SMTGFLIGFOSQSD---PETAYIHFGSHHPDFRKMQIGKOLYDVFIEITVKORGCITRVKCVTSPVNVKVSIAVHTKLGFDIEKgtktvngisvfyanydgpgqdrvlfvkni--<br/>       --DIRQMNKTHLHWRGLRKQLPCHPDDAHLADGEEILQADHLASFAMADGVAIGFADASIRHdyvngcdsSPVVVLEGFIFLPSFRQGVAKOLIAAVQVWGTNKGCREMASDTSPEENTISQKVQALGFEETE-----RVIFYRKrc-----</p>                                                                                                                                                                                                                                                                    |

|     |                                                           |   |       |                                                                                                                                                                                                                                                                                                                                                                                                                                                                                                                                                                                                                                                                                                                                                                                                                                                                                                                                                                                                                                                                                                                                                                                                                                                                                                                                                                                                                                                                                                                                                                                                                                                                                                                                                                     |
|-----|-----------------------------------------------------------|---|-------|---------------------------------------------------------------------------------------------------------------------------------------------------------------------------------------------------------------------------------------------------------------------------------------------------------------------------------------------------------------------------------------------------------------------------------------------------------------------------------------------------------------------------------------------------------------------------------------------------------------------------------------------------------------------------------------------------------------------------------------------------------------------------------------------------------------------------------------------------------------------------------------------------------------------------------------------------------------------------------------------------------------------------------------------------------------------------------------------------------------------------------------------------------------------------------------------------------------------------------------------------------------------------------------------------------------------------------------------------------------------------------------------------------------------------------------------------------------------------------------------------------------------------------------------------------------------------------------------------------------------------------------------------------------------------------------------------------------------------------------------------------------------|
| 387 | <p><b>lobpA (158)</b></p> <hr/> <p><b>1cj5A (162)</b></p> | C | 14.56 | <p><b>TM-align:</b> aliSize=121 (resi) RMSD=3.37 (Å)<br/> qeee-----AEQNLSLSPRTVYIGSTNPEKI-OENGFRTYFRELVFDDKkTVDYFYSVKRDGKWKVHVKATKODD-GTYVA-YEGONVFKIVSLSR-THVAHNI-VdkhGOT--TEL TGLFV-KLNvededlekfwkltedkgidkknvvnf-----<br/> ----ayvtqtmKGLDIQKVAITVYSLAMAASDI SLLDQSAFLRVVVEELKPTP-G-DLEILLQKWENDECAQKKIIEETKiPAVFKI-DALNE-KVLVLDTDYKYL LFCME-S---AEPeQSLVCOCLVRTP-----evddealekfdkalkalpnhirlsfntq</p> <p>NedHPHpe<br/> EE--QCHI-</p> <p><b>SARST:</b> aliSize=118 (resi) RMSD=5.19 (Å)<br/> qe----EEAQNLSLSPRTVYIGSTNPEKIOE-NGFPRTYFRELVFDDKkTVDYFYSVKRDGKWKVHVKATKOD-DGTYVA-YEGONVFKIVSLSR-THVAHNI--VDKHGOTTTELGT-----L FV-KL-----nvededlekfwkltedkgidkknvvn<br/> ----ayvtqTMKGLDIQKVAITVYSLAMAASDI SLLDQSAFLRVVVEELKPTP-G-DLEILLQKWENDECAQKKIIEETKiPAVFKI-DALNE-KVLVLDTDYKYL LFCME-SaEPEQSLVCOCLVRtpevddalekfdkalkalpnhirlsfntqleeqch-----</p> <p>flenedhphpe<br/> -----</p> <p><b>BLAST:</b> aliSize=54 (resi) iden=15.82% (25/158) simi=34.18% (54/158)<br/> qeeaeq-----NLSELSPRTVYIGSTNPEKIO-ENGFRTYFRELVFDDKkTVDYFYSVKRDGKWKVHVKATKOD-DGTYVA-YEGONVFKIVSLSR-THVAHNI-VDKHGOTTTELGT-FV-KLNVEDDLEKFWK-----l tedkgidkknvvnflenedh<br/> ----ayvtqtmkgldIQKVAITVYSLAMAASDI SLLDQSAFLRVVVEELKPTP-G-DLEILLQKWENDECAQKKIIEETKiPAVFKI-DALNE-KVLVLDTDYKYL LFCME-SaEPEQSLVCOCLVRTPEDDALKALPnhirlsfntqleeqch-----</p> <p>phpe<br/> -----</p> <p><b>Proposed:</b> aliSize=140 (resi) RMSD=2.77 (Å)<br/> qeee-----A-eQnLSLSPRTVYIGSTNPEKIO-ENGFRTYFRELVFDDKkTVDYFYSVKRDGKWKVHVKATKOD-dG-TYVA-YEGONVFKIVSLSR-THVAHNI-VdkhGOT--TEL TGLFV-K-LNVEDDLEKFWKLTEDKGI DkKNVNFL-E----nedHPHpe<br/> ----ayvtqtmkgldIQKVAITVYSLAMAASDI SLLDQSAFLRVVVEELKPT-PE-DLEILLQKWENDECAQKKIIEETKiPAVFKI-DALNE-KVLVLDTDYKYL LFCME-S---AEPeQSLVCOCLVRtp-EVDDALKALPnhirlsfntqleeqch-----CHI--</p> |
| 388 | <p><b>lobpA (158)</b></p> <hr/> <p><b>ldv9A (162)</b></p> | C | 15.19 | <p><b>TM-align:</b> aliSize=120 (resi) RMSD=2.92 (Å)<br/> qeee-----AEQNLSLSPRTVYIGSTNPEKIOE-NGFPRTYFRELVFDDKkTVDYFYSVKRDGKWKVHVKATKODD-GTYVA-YEGONVFKIVSLSR-THVAHNI-VdkhGOT--TEL TGLFV-KLNvededlekfwkltedkgidkknvvnflened-----<br/> ----ayvtqtmKGLDIQKVAITVYSLAMAASDI SLLDQSAFLRVVVEELKPT-PE-DLEILLQKWENDECAQKKIIEETKiPAVFKI-DALNE-KVLVLDTDYKYL LFCME-Sa--EPeQSLVCOCLVRTP-----evddealekfdkalkalpnhirlsfn</p> <p>----HPHPE-<br/> ptqlEEQChi</p> <p><b>SARST:</b> aliSize=124 (resi) RMSD=11.51 (Å)<br/> qeeaeqnls-----ELSPRTVYIGSTNPEKIO-ENGFRTYFRELVFDDKkTVDYFYSVKRDGKWKVHVKATKOD-DGTYVA-YEGONVFKIVSLSR-THVAHNI--VDKHGOTTTELGT-FV-KLNVEDDLEKFWKLTEDK-----gidkknvvnflene<br/> ----ayvtqtmkgldIQKVAITVYSLAMAASDI SLLDQSAFLRVVVEELKPT-PE-DLEILLQKWENDECAQKKIIEETKiPAVFKI-DALNE-KVLVLDTDYKYL LFCME-SaEPEQSLVCOCLVRTPEDDALKALPnhirlsfntqleeqchi-----</p> <p>dhphpe<br/> -----</p> <p><b>BLAST:</b> aliSize=54 (resi) iden=15.82% (25/158) simi=34.18% (54/158)<br/> qeeaeq-----NLSELSPRTVYIGSTNPEKIO-ENGFRTYFRELVFDDKkTVDYFYSVKRDGKWKVHVKATKOD-DGTYVA-YEGONVFKIVSLSR-THVAHNI-VDKHGOTTTELGT-FV-KLNVEDDLEKFWK-----l tedkgidkknvvnflened<br/> ----ayvtqtmkgldIQKVAITVYSLAMAASDI SLLDQSAFLRVVVEELKPTP-G-DLEILLQKWENDECAQKKIIEETKiPAVFKI-DALNE-KVLVLDTDYKYL LFCME-SaEPEQSLVCOCLVRTPEDDALKALPnhirlsfntqleeqchi-----</p> <p>hphpe<br/> -----</p> <p><b>Proposed:</b> aliSize=142 (resi) RMSD=2.11 (Å)<br/> qeee-----AEQNLSLSPRTVYIGSTNPEKIOE-NGFPRTYFRELVFDDKkTVDYFYSVKR--dgKWKVHVKATKODD-GTYVA-YEGONVFKIVSLSR-THVAHNI--VdkhGOT--TEL TGLFV-K-LNVEDDLEKFWKLTEDKGI DkKNVNFL-EN---edhPHPE<br/> ----ayvtqtmkgldIQKVAITVYSLAMAASDI SLLDQSAFLRVVVEELKPT-PE-DLEILLQKWENDECAQKKIIEETKiPAVFKI-DALNE-KVLVLDTDYKYL LFCME-Sa----EpeQSLVCOCLVRtpevddALKALPnhirlsfntqleeqch-----QCHI</p>      |
| 389 | <p><b>lobpA (158)</b></p> <hr/> <p><b>lpboA (157)</b></p> | N | 91.72 | <p><b>TM-align:</b> aliSize=147 (resi) RMSD=0.99 (Å)<br/> qeeaeq-----NLSELSPWRTVYIGSTNPEKIQENGFRTYFRELVFDDKkTVDYFYSVKRDGKWKVHVKATKODDGTYYADYEGONVFKIVSLSRTHLVAHNI-VDKHGOTTTEL TGLFV-KLNVEDDLEKFWKLTEDKGI DkKNVNFL-EN---EDhphpe<br/> -----aqeeaeqNLSELSPWRTVYIGSTNPEKIQENGFRTYFRELVFDDKkTVDYFYSVKRDGKWKVHVKATKODDGTYYADYEGONVFKIVSLSRTHLVAHNI-VDKHGOTTTEL TGLFV-KLNVEDDLEKFWKLTEDKGI DkKNVNFL-EN---EDhphpe</p> <p><b>SARST:</b> aliSize=147 (resi) RMSD=4.00 (Å)<br/> qe---EEAQNLSLSPWRTVYIGSTNPEKIQENGFRTYFRELVFDDKkTVDYFYSVKRDGKWKVHVKATKODDGTYYADYEGONVFKIVSLSRTHLVAHNI-VDKHGOTTTEL TGLFV-KLNVEDDLEKFWKLTEDKGI DkKNVNFL-----enedhphpe<br/> --aqeEEAQNLSLSPWRTVYIGSTNPEKIQENGFRTYFRELVFDDKkTVDYFYSVKRDGKWKVHVKATKODDGTYYADYEGONVFKIVSLSRTHLVAHNI-VDKHGOTTTEL TGLFV-KLNVEDDLEKFWKLTEDKGI DkKNVNFL-enedhph-----</p> <p><b>BLAST:</b> aliSize=155 (resi) iden=98.73% (155/157) simi=98.73% (155/157)<br/> - QEEAEQNLSLSPWRTVYIGSTNPEKIQENGFRTYFRELVFDDKkTVDYFYSVKRDGKWKVHVKATKODDGTYYADYEGONVFKIVSLSRTHLVAHNI-VDKHGOTTTEL TGLFV-KLNVEDDLEKFWKLTEDKGI DkKNVNFL-ENEDHphpe<br/> a QEEAEQNLSLSPWRTVYIGSTNPEKIQENGFRTYFRELVFDDKkTVDYFYSVKRDGKWKVHVKATKODDGTYYADYEGONVFKIVSLSRTHLVAHNI-VDKHGOTTTEL TGLFV-KLNVEDDLEKFWKLTEDKGI DkKNVNFL-ENEDHphpe</p> <p><b>Proposed:</b> aliSize=153 (resi) RMSD=0.81 (Å)<br/> QEEAEQNLSLSPWRTVYIGSTNPEKIQENGFRTYFRELVFDDKkTVDYFYSVKRDGKWKVHVKATKODDGTYYADYEGONVFKIVSLSRTHLVAHNI-VDKHGOTTTEL TGLFV-KLNVEDDLEKFWKLTEDKGI DkKNVNFL-EN---EDhphpe<br/> AQEEAEQNLSLSPWRTVYIGSTNPEKIQENGFRTYFRELVFDDKkTVDYFYSVKRDGKWKVHVKATKODDGTYYADYEGONVFKIVSLSRTHLVAHNI-VDKHGOTTTEL TGLFV-KLNVEDDLEKFWKLTEDKGI DkKNVNFL-enedhph-----</p>                                                                                                                      |

|     |             |   |       |                                                                                                                                                                                                                                                                                                                                                                                                                                                                                                                                                                                                                                                                                                                                                                                                                                                                                                                                                                                                                                                                                                                                                                                                                                                                                                                                                                                                                                                                                                                                                                                                                                                                                                                                                                                                                                                                                                                                                                                             |
|-----|-------------|---|-------|---------------------------------------------------------------------------------------------------------------------------------------------------------------------------------------------------------------------------------------------------------------------------------------------------------------------------------------------------------------------------------------------------------------------------------------------------------------------------------------------------------------------------------------------------------------------------------------------------------------------------------------------------------------------------------------------------------------------------------------------------------------------------------------------------------------------------------------------------------------------------------------------------------------------------------------------------------------------------------------------------------------------------------------------------------------------------------------------------------------------------------------------------------------------------------------------------------------------------------------------------------------------------------------------------------------------------------------------------------------------------------------------------------------------------------------------------------------------------------------------------------------------------------------------------------------------------------------------------------------------------------------------------------------------------------------------------------------------------------------------------------------------------------------------------------------------------------------------------------------------------------------------------------------------------------------------------------------------------------------------|
| 390 | lobpA (158) | C | 7.59  | <p><b>TM-align:</b> aliSize=119 (resi) RMSD=3.64 (Å)<br/> qeee-----AEONLSELGSPRTVYIGSTNPEKIOENgpfrTYFrELVFDDEKGTVDYFYSVKRDGKWKNVHVKATKODDG-TVYADY-----EGONVFKIVSLSRTHLVAHININVDKHGOTTEITGLFVKLNvededlekfwkltedkqidkknvvn-----<br/> ----actknaiaqtgFNKDKYFNGDVVYVTDYLDLEDDVPKR---YCAA-LAAGTASGKLEALYHYDPKTDQTFYDSELQVESLgkYtanfkkvdkngnvkvavtagNYTITVMYADSSALIITCLHKGNAAGDLYAVLNrnkDAAAGDKVKSavsaaat</p> <p>-----FLNEdhphpe-----<br/> lefskfstkenncaYDNDSD-----lkslltk</p> <p><b>SARST:</b> aliSize=121 (resi) RMSD=16.09 (Å)<br/> qeeaeqnlselfsgpwrtvvyigstnpeki-----ENG----PF--RTYFRELVFdEKG----TVDFYFSVKRDGKWKNVHVKATKqDDGTYVAIY-----EGONVFKIVSLSRTHLVAHININVDKHGOTTEITGLFV---KLNVEDEDLEKFWklteD<br/> -----actknaiaqtgFNkdkyFNgdVWVYVTDYLD-LPPDvpkrYCAALAAAGTASGKLEALYHYDP-KTQDTFYVselqveslgkYtanfkkvdkngnvkvavtagNYTITVMYADSSALIITCLHKGNAAGDLYAVLNrnkDAAAGDKVKSAVS----A</p> <p>KGIDKKNVNFLEEDHPH-----pe<br/> ATLEFSKFIStkENNCAyDnds lkslltk--</p> <p><b>BLAST:</b> aliSize=19 (resi) iden=8.86% (14/158) simi=12.03% (19/158)<br/> qeeaeqnlselfsgpwrtvvyigstnpekiqengpfrtyfrELVfddekgtvdfyfsvkrdGkwknvhvkat-----ODDGTVAIYEGINVKINSLSRTHLVAHNIIN---VDKHL-----<br/> -----actknaiaqtgfnkdkyfngdvwyvtdyldlepddvpkrycaalaagtasgKLEALHYDPKTDQTFYDSELQVESLgkYtanfkkvdkngnvkvavtagNYTITVMYADSSALIITCLHKGNAAGDLYAVLNrnkDAAAGDKVKSAVS----A</p> <p>-----qteltglfvkInvededlekfwkltedkqidkknvvnflenedhphpe<br/> htclhkgkaagdlyavlnrnkdaaagdkvksavsaaatlefskfstkenncaYDnds lkslltk-----</p> <p><b>Proposed:</b> aliSize=132 (resi) RMSD=2.38 (Å)<br/> qeeae-----ONL-SGLSGPRTVYIGSTNPEKIOENgpfrTYFrELVFD--dEgTVDFYFSVK--rdGKWKNVHVKATKODDG-TVYADY-----eGONVFKIVSLSRTHLVAHININVDKHGOTTEITGLFVKLNVEdeDLEKFWKLTEDKGI DKKNVNFLEEN--<br/> -----actknaiaqtgfnKDKYFN-GDVVYVTDYLDLEDDVPKR---YCAA-LAGTas-GK-LKEALYHYDPK--TQDTFYDSELQVESLgkYtanfkkvdkngnvkvavtagNYTITVMYADSSALIITCLHKGNAAGDLYAVLNrnkDAA--AGDKVKSAVSAAATLEFSKFIStkENNc</p> <p>-----edhphpe<br/> aydnds lkslltkh-----</p>                           |
| 391 | lobpA (158) | C | 6.96  | <p><b>TM-align:</b> aliSize=119 (resi) RMSD=3.91 (Å)<br/> qeee-----AEONLSELGSPRTVYIGSTNPEKIOENgpfrTYFrELVFDDEKGTVDYFYSVKRDGKWKNVHVKATKODDG-TVYADY-E-----GONVFKIVSLSRTHLVAHININVDKHGOTTEITGLFVKLNvededlekfwkltedkqidkknvvn-----<br/> ----mkctknaiaqtgFNKDKYFNGDVVYVTDYLDLEDDVPKR---YCAA-LAAGTASGKLEALYCYDPKTDQTFYDSELQEESpGkYtanfkkvdkngnvkvavtagNYTITVMYADSSALIITCLHKGKDLGDLYAVLNrnkDAAAGDKVKSAVSAAATLEFSKFIStkENNc</p> <p>-----FLNEdhphpe-----<br/> slkfsdfistkdnkceYDNVS-----lkslltk</p> <p><b>SARST:</b> aliSize=142 (resi) RMSD=16.23 (Å)<br/> qeeaeqnl-----SELGSPRTVYIGSTNPEKIOENgpfrTYFrELVFD-----PFRTYFRELVFDEKGTVDYFYSVKRDGKW-NVHVKATKODDITY-VADYEONVF-KIVSLSRTHLVAHININVDKHGOTTEITGLFVKLNVEdeDLEKFWklteDKGIDKKNVNFLEEDHPH-<br/> -----mkctknaiaqtgfnkdkyfngdvwyvtdyldleddvpkrYcaalaagtasGKLEALYCYDPKTDQTFYDSELQEESpGkYtanfkkvdkngnvkvavtagNYTITVMYADSSALIITCLHKGKDLGDLYAVLNrnkDAAAGDKVKSAVSAAATLEFSKFIStkENNc</p> <p>-----pe<br/> vslkslltk--</p> <p><b>BLAST:</b> aliSize=5 (resi) iden=3.16% (5/158) simi=3.16% (5/158)<br/> qeeaeqnlselfsgpwrtvvyigstnpekiqengpfrtyfrELVfddekgtvdfyfsvkrdGkwknvhvkatkqd-----GTYADY-----<br/> -----mkctknaiaqtgfnkdkyfngdvwyvtdyldlepddvpkrycaalaagtasgkLKEALYCYDPKTDQTFYDSELQEESpGkYtanfkkvdkngnvkvavtagNYTITVMYADSSALIITCLHKGKDLGDLYAVLNrnkDAAAGDKVKSAVSAAATLEFSKFIStkENNc</p> <p>-----egqnvfkivslsrthlvahninvdkhgqteltglfvkInvededlekfwkltedkqidkknvvnflenedhphpe<br/> salihtclhkgkdlgdlyavlnrnkdnagdkvkgavtaaslkfsdfistkdnkceYDnds lkslltk-----</p> <p><b>Proposed:</b> aliSize=129 (resi) RMSD=2.55 (Å)<br/> qeee-----AEONLSEL-S-GPRTVYIGSTNPEKIOENgpfrTYFrELVFD--deEgTVDFYFSVK--rdG-KWKNVHVKATKODDG-TVYADY-----eGONVFKIVSLSRTHLVAHININVDKHGOTTEITGLFVKLNVEdeDLEKFWKLTEDKGI DKKNVNFLEEN--<br/> ----mkctknaiaqtgFNKDKYFNGDVVYVTDYLDLEDDVPKR---YCAA-LAAGTasg--L-KEALYCYDPK--TQDTFYDSELQEE-SPGkYtanfkkvdkngnvkvavtagNYTITVMYADSSALIITCLHKGKDLGDLYAVLNrnkDAA--AGDKVKSAVSAAATLEFSKFIStkENNc</p> <p>-----edhphpe<br/> DnkceYDnds lkslltkh-----</p> |
| 392 | 1q2yA (140) | C | 12.14 | <p><b>TM-align:</b> aliSize=122 (resi) RMSD=2.41 (Å)<br/> KAVIAKNEEOKDAFYVREEVFvkeqNPAAEEI DELE-N---E--SEHIVVYDGEKPVAGRWRMKD-----GYGKERICVTKSHRSAGVGGIIMKALEKAAADGASGFILNAO--TQ-AVPFYKKHGYRVLSEkefldaGiphlqmmkd----<br/> mDIRQMN-KTHLEHWRLRKQLWP---GHPDDAHLADGeeilqA---DHLASFIAMADGVAIFADASIRHdyvngcdssPVVFLGIFVLPSPFRQGVAKQLIAVQRWGTNKC CREMASDTSpenTisQKVHQALGFEETERVIF-----yrkrC</p> <p><b>SARST:</b> aliSize=119 (resi) RMSD=6.00 (Å)<br/> m-KAVIAKNEEOKDAFYVREEVFvkeqNPAAEEI DELE-N---E--SEHIVVYDGEKPVAGRWRMKDGYGKLeRI-----CYLTKSHRSAGVGGIIMKALEKAAADGASGFILNAO--TQ-AVPFYKKHGYRVLSEkefldaGiphlOMMS--d<br/> -mDIRQMN-KTHLEHWRLRKQLWP---GHPDDAHLADGeeilqA---DHLASFIAMADGVAIFADASIRHdyvngcdssPVVFLGIFVLPSPFRQGVAKQLIAVQRWGTNKC CREMASDTSpenTisQKVHQALGFEETERVIF-----RVI FYRrc-</p> <p><b>BLAST:</b> aliSize=34 (resi) iden=14.29% (20/140) simi=24.29% (34/140)<br/> mkaviakneeokdafyvreevfveqnpvae-----mdirqmknkthlehwrlrkqlwghpddahladgEEIDELNESEHIVVYDGEKPVAGRWRMKDGI---G-----KLERICVTKSHRSAGVGGIIMKALEKAAADGASGFILNAO--TQ-AVPFYKKHGYRVLSEkefldaGiphlOMMS--d<br/> -----vpfykhhgyrvlsekefldaGiphlqmmkd</p> <p><b>Proposed:</b> aliSize=125 (resi) RMSD=2.02 (Å)<br/> KAVIAKNEEOKDAFYVREEVFvkeqNPAAEEI DELE-N---E--SEHIVVYDGEKPVAGRWRMKD-----GYGKERICVTKSHRSAGVGGIIMKALEKAAADGASGFILNAO--TQ-AVPFYKKHGYRVLSEkefldaGIPHLOM-mkd<br/> mDIRQMN-KTHLEHWRLRKQLWP---GHPDDAHLADGeeilqA---DHLASFIAMADGVAIFADASIRHdyvngcdssPVVFLGIFVLPSPFRQGVAKQLIAVQRWGTNKC CREMASDTSpenTisQKVHQALGFEETERVIF-----RVI FYRrc-</p>                                                                                                                                                                                                                                                                                                                                                                                                                                                                                    |
|     | 1s3zB (145) |   |       |                                                                                                                                                                                                                                                                                                                                                                                                                                                                                                                                                                                                                                                                                                                                                                                                                                                                                                                                                                                                                                                                                                                                                                                                                                                                                                                                                                                                                                                                                                                                                                                                                                                                                                                                                                                                                                                                                                                                                                                             |

|     |                                             |   |       |                                                                                                                                                                                                                                                                                                                                                                                                                                                                                                                                                                                                                                                                                                                                                                                                                                                                                                                                                                                                                                     |
|-----|---------------------------------------------|---|-------|-------------------------------------------------------------------------------------------------------------------------------------------------------------------------------------------------------------------------------------------------------------------------------------------------------------------------------------------------------------------------------------------------------------------------------------------------------------------------------------------------------------------------------------------------------------------------------------------------------------------------------------------------------------------------------------------------------------------------------------------------------------------------------------------------------------------------------------------------------------------------------------------------------------------------------------------------------------------------------------------------------------------------------------|
| 393 | <p>1q2yA (140)</p> <hr/> <p>2o28A (182)</p> | C | 15.71 | <p><b>TM-align:</b> aliSize=121 (resi) RMSD=3.18 (Å)<br/> pdetpmdpsllkevdsqntatfspaispthpgeglvrlrplctadlnrgffkvlglqletgvspeqfmsfehmksgdyvvtvedvtlgqivaatliahkfihscaKRVRVDDVVSDECGKQLKLLSTLTLSSKLNCKYKITLCLPQNGFYKFGYTSSENYMCRRF</p> <p><b>SARST:</b> aliSize=109 (resi) RMSD=7.47 (Å)<br/> m-pdetpmdpsllkevdsqntatfspaispthpgeglvrlrplctadlnrgffkvlglqletgvspeqfmsfehmksgdyvvtvedvtlgqivaatliahkfihscaKRVRVDDVVSDECGKQLKLLSTLTLSSKLNCKYKITLCLPQNGFYKFGYTSSENYMCRRF</p> <p><b>BLAST:</b> aliSize=29 (resi) iden=12.86% (18/140) simi=20.71% (29/140)<br/> mkaviakneeqlkdafyvreevfveqnpaeecidelenehivvydgekpvagrwrmkdgy-pdetpmdpsllkevdsqntatfspaispthpgeglvrlrplctadlnrgffkvlglqletgvspeqfmsfehmksgdyvvtvedvtlgqivaatliahkfihscaKRVRVDDVVSDECGKQLKLLSTLTLSSKLNCKYKITLCLPQNGFYKFGYTSSENYMCRRF</p> <p><b>Proposed:</b> aliSize=117 (resi) RMSD=2.20 (Å)<br/> pdetpmdpsllkevdsqntatfspaispthpgeglvrlrplctadlnrgffkvlglqletgvspeqfmsfehmksgdyvvtvedvtlgqivaatliahkfihscaKRVRVDDVVSDECGKQLKLLSTLTLSSKLNCKYKITLCLPQNGFYKFGYTSSENYMCRRF</p> |
| 394 | <p>1q2yA (140)</p> <hr/> <p>2vbqB (144)</p> | C | 12.14 | <p><b>TM-align:</b> aliSize=122 (resi) RMSD=2.55 (Å)<br/> mkAVIAkNEEQIKD-AFYVREEVfVkeqnpAEeEDEL-EN-E--SEHIVVYDGEKPVAGRWRMKD-----GYGKLERICVLSKSHRSAGVGGIIMKALEKAAADGASGFIILNAO--TOAVPFYKHHYRVLSEKEFLdagiphlqmmkd----</p> <p><b>SARST:</b> aliSize=90 (resi) RMSD=5.48 (Å)<br/> mkaviakneeqlkdafyvreevfveqnpaeecidelenehivvydgekpvagrwrmkd-----GYGKLERICVLSKSHRSAGVGGIIMKALEKAAADGASGFIILNAO--TOAVPFYKHHYRVLSEKEFLdagiphlqmmkd-----</p> <p><b>BLAST:</b> aliSize=34 (resi) iden=14.29% (20/140) simi=24.29% (34/140)<br/> mkaviakneeqlkdafyvreevfveqnpaeecidelenehivvydgekpvagrwrmkdgy-pdetpmdpsllkevdsqntatfspaispthpgeglvrlrplctadlnrgffkvlglqletgvspeqfmsfehmksgdyvvtvedvtlgqivaatliahkfihscaKRVRVDDVVSDECGKQLKLLSTLTLSSKLNCKYKITLCLPQNGFYKFGYTSSENYMCRRF</p> <p><b>Proposed:</b> aliSize=124 (resi) RMSD=2.02 (Å)<br/> mkAVIAkNEEQIKD-AFYVREEVfVkeqnpAEeEDEL-EN-E--SEHIVVYDGEKPVAGRWRMKD-----GYGKLERICVLSKSHRSAGVGGIIMKALEKAAADGASGFIILNAO--TOAVPFYKHHYRVLSEKEFLdagiphlqmmkd-----</p>                                             |
| 395 | <p>1q2yA (140)</p> <hr/> <p>2vxkA (165)</p> | C | 18.57 | <p><b>TM-align:</b> aliSize=120 (resi) RMSD=2.89 (Å)<br/> entplfspdliavlpadytirplcrsdYkrgYLDLRLVLT---TVGDI-neeqwnsryewIraSdeYLLVVCDEGRIVGTSLVVERKfihsIgmVCHIEDIAEKGOQKGLLRITQALDYVAEKVCYKTLDCSEANEGEYICCFKRAGLEMAHY-----</p> <p><b>SARST:</b> aliSize=107 (resi) RMSD=6.12 (Å)<br/> mkavi-entplfspdliavlpadytirplcrsdYkrgYLDLRLVLT---TVGDI-neeqwnsryewIraSdeYLLVVCDEGRIVGTSLVVERKfihsIgmVCHIEDIAEKGOQKGLLRITQALDYVAEKVCYKTLDCSEANEGEYICCFKRAGLEMAHY-----</p> <p><b>BLAST:</b> aliSize=39 (resi) iden=17.86% (25/140) simi=27.86% (39/140)<br/> mkaviakneeqlkdafyvreevfveqnpaeecidelenehivvydgekpvagrwrmkdgy-pdetpmdpsllkevdsqntatfspaispthpgeglvrlrplctadlnrgffkvlglqletgvspeqfmsfehmksgdyvvtvedvtlgqivaatliahkfihscaKRVRVDDVVSDECGKQLKLLSTLTLSSKLNCKYKITLCLPQNGFYKFGYTSSENYMCRRF</p> <p><b>Proposed:</b> aliSize=115 (resi) RMSD=2.00 (Å)<br/> entplfspdliavlpadytirplcrsdYkrgYLDLRLVLT---TVGDI-neeqwnsryewIraSdeYLLVVCDEGRIVGTSLVVERKfihsIgmVCHIEDIAEKGOQKGLLRITQALDYVAEKVCYKTLDCSEANEGEYICCFKRAGLEMAHY-----</p>                  |

|     |                |   |       |                                                                                                                                                                                                                                                                                                                                                                                                                                                                                                                                                                                                                                                                                                                                                                                                                                                                                                                                                                                                                                                                                                                                                                                                                                                                                                                                                                                                                                                                                                                                                                                                                                                                                                                                                                                                                    |
|-----|----------------|---|-------|--------------------------------------------------------------------------------------------------------------------------------------------------------------------------------------------------------------------------------------------------------------------------------------------------------------------------------------------------------------------------------------------------------------------------------------------------------------------------------------------------------------------------------------------------------------------------------------------------------------------------------------------------------------------------------------------------------------------------------------------------------------------------------------------------------------------------------------------------------------------------------------------------------------------------------------------------------------------------------------------------------------------------------------------------------------------------------------------------------------------------------------------------------------------------------------------------------------------------------------------------------------------------------------------------------------------------------------------------------------------------------------------------------------------------------------------------------------------------------------------------------------------------------------------------------------------------------------------------------------------------------------------------------------------------------------------------------------------------------------------------------------------------------------------------------------------|
| 396 | 1s60A<br>(152) | C | 13.82 | <p>TM-align: aliSize=132 (resi) RMSD=2.09 (Å)<br/>lvprgshDIROMNKT--HLEHWRGTRKOLWPG--HPDdAHLADGEEITLQADHLASFIAMADGVAITGFADASIRHDYVngcdsSPVVFEGIFLPSFRORGVAKOIIAAVORWGTNKCREMASDTSPE--N-----TISOKVHOALCFEETERVLFYRkr-----<br/>-----GIRSEFDdRNNpvLKDQLSDLRLTWPEEYGDSSAAEEVEEM-NPERIAVAVDQDELVGTGIIPOYGD-----ITGWEHPLVWESRRKNOIGTRLVNYLEKEVASRGGITTYLGGDDLdhtltsqtdlyehtfdkvasiqnlreHPYEFYKLYKIVGVLpnangwkdpiw</p> <p>-----<br/>maktiiprps</p> <p>SARST: aliSize=108 (resi) RMSD=3.30 (Å)<br/>lvprgshMDIROMNKT--HLEHWRGTRKOLWPG--HPDdAHLADGEEITLQADHLASFIAMADGVAITGFADASIRHDYVNGCDSSPVVflegifLPSFRORGVAKOIIAAVORWGTNKCREMASDTS-----<br/>-----mIIESEFDdRNNPVKdqLSDLRLTWPEEYGDSSAAEEVEEM-NPERIAVAVDQDELVGTGII-----POYIIT--GWEHPLVWESRRKNOIGTRLVNYLEKEVASRGGITTYLGGDDLdhtltsqtdlyehtfdkvasiqnlreHPYEFYKLYKIVGVLpnangwkdpiw</p> <p>-----pentisqkvhqaalgeeterVIFYRkr<br/>iiprps-----</p> <p>BLAST: aliSize=56 (resi) iden=18.42% (28/152) simi=36.84% (56/152)<br/>lvprgshmdiRqmkthlehwrg-----KLRKOLWPGHPDdAHLADGEEITLQADHLASFIAMADGVAITGFADASIRHDYVNGCDSSPVVflegifLPSFRORGVAKOIIAAVORWGTNKCREM-----ASTSPENTISOKVHOALCFEETERVLFYR-----<br/>-----miisefdRNNpvLkdqLSDLRLTWPEEYGDSSAAEEVEEMNPERIAVAVDQDELVGTGII-----ITWELHPLV-----ESSRRKNOIGTRLVNYLEKEVASRGGITTYLGGDDLdhtltsqtdlyehtfdkvasiqnlreHPYEFYKLYKIVGVLpnangwkdpiw</p> <p>-----rc<br/>pnangwkdpiwaktiiprps-----</p> <p>Proposed: aliSize=135 (resi) RMSD=1.73 (Å)<br/>lvprgshDIROMNKT--HLEHWRGTRKOLWPG--HPDdAHLADGEEITLQADHLASFIAMADGVAITGFADASIRHDYVngcdsS-PVVVFEGIFLPSFRORGVAKOIIAAVORWGTNKCREMASDTSPE--N-----TISOKVHOALCFEETERVLFYR-----<br/>-----GIRSEFDdRNNpvLKDQLSDLRLTWPEEYGDSSAAEEVEEM-NPERIAVAVDQDELVGTGIIPOYGD-----GITGWEHPLVWESRRKNOIGTRLVNYLEKEVASRGGITTYLGGDDLdhtltsqtdlyehtfdkvasiqnlreHPYEFYKLYKIVGVLpnangwkdpiwMAK</p> <p>K-RC-----c<br/>TilPrpsa-</p> |
|     | 1b87A<br>(181) |   |       |                                                                                                                                                                                                                                                                                                                                                                                                                                                                                                                                                                                                                                                                                                                                                                                                                                                                                                                                                                                                                                                                                                                                                                                                                                                                                                                                                                                                                                                                                                                                                                                                                                                                                                                                                                                                                    |

|     |                |   |      |                                                                                                                                                                                                                                                                                                                                                                                                                                                                                                                                                                                                                                                                                                                                                                                                                                                                                                                                                                                                                                                                                                                                                                                                                                                                                                                                                                                                                                                                                                                                                                                                                             |
|-----|----------------|---|------|-----------------------------------------------------------------------------------------------------------------------------------------------------------------------------------------------------------------------------------------------------------------------------------------------------------------------------------------------------------------------------------------------------------------------------------------------------------------------------------------------------------------------------------------------------------------------------------------------------------------------------------------------------------------------------------------------------------------------------------------------------------------------------------------------------------------------------------------------------------------------------------------------------------------------------------------------------------------------------------------------------------------------------------------------------------------------------------------------------------------------------------------------------------------------------------------------------------------------------------------------------------------------------------------------------------------------------------------------------------------------------------------------------------------------------------------------------------------------------------------------------------------------------------------------------------------------------------------------------------------------------|
| 397 | 1s60A<br>(152) | C | 8.82 | <p>TM-align: aliSize=122 (resi) RMSD=2.93 (Å)<br/>lvprgSHMDIROMN--K-THEHWRGTRKOLWPG--GHPDdAHLA--DGEETLQADHLASFIAMADGVAITGFADASIRHDYVngcdsDSSPVVLEGIFLPSFRORGVAKOIIAAVORWGTNKCREMASDTSpENTIsakv-----HQalGfeeteerviFYRkr-----<br/>-----GIRTRCRLGpdQvKSMRAALDIFGRDFGDVATYSQHOPdsYLGNLRSKTFIALAFDQEA VVGCALAAVYVLPKFEQ-----eQPRSEIYIDLAVSGEHRROGITATAINLLKHEANALGAYVIYVQAD-YGD-----dpavalyt--KL-----</p> <p>SARST: aliSize=107 (resi) RMSD=3.37 (Å)<br/>lvprgs-HMDIROMNKT--HLEHWRGTRKOLWPG--GHPDdAHLA--DGEETLQADHLASFIAMADGVAITGFADASIRHDYVngcdsSPVVFLEGIFLPSFRORGVAKOIIAAVORWGTNKCREMAS-----<br/>-----gIRTRCRLGPDQVKSMAALdlfgrefgdvatYSQHOPD-----SDYLGNLRSKTFIALAFDQEA VVGCALAAVYVLPKFEQ---PRSEIYIDLAVSGEHRROGITATAINLLKHEANALGAYVIYVQADYgddpavalYtk-----dtspentisqkvhqaalgeeteerviFYRkr-----</p> <p>BLAST: aliSize=9 (resi) iden=5.93% (8/136) simi=6.67% (9/136)<br/>lvprgshmdiRqmkthlehwrglrkqlwpgHPDdahladgeeilqadhlasfiAmadgvaigfadasirhdYVngcds-----<br/>-----giirtcrlgpdqvkSMRAALdlfgrefgdvatysqhQpdsdylgnllrsktfialaafDQEA VVGCALAAVYVLPKFEQprseiyidlavsgehrroGITATAINLLKHEANALGAYVIYVQADYgddpavalYtk-----</p> <p>-----rgvakqliaavqrgwtnkgcremasdtspentisqkvhqaalgeeteerviFYRkr<br/>gayviyVQADYgddpavalYtk-----</p> <p>Proposed: aliSize=120 (resi) RMSD=2.14 (Å)<br/>lvprgSHMDIROMN--KT--HLEHWRGTRKOLWPG--GHPDdAHLA--DGEETLQADHLASFIAMADGVAITGFADASIRHD-----YVngcdsSPVVFLEGIFLPSFRORGVAKOIIAAVORWGTNKCREMASDT--spentisakvhaalefeETE--RVIFYR--krcc<br/>-----GIRTRCRLGpdQvKSMRAALDIFGRDFGDVATYSQHOPdsYLGNLRSKTFIALAFDQEA VVGCALAAVYVLPKFEQ-----RSEIYIDLAVSGEHRROGITATAINLLKHEANALGAYVIYVQADY-----GDDpavalYtklC-----</p> |
|     | 1bo4B<br>(136) |   |      |                                                                                                                                                                                                                                                                                                                                                                                                                                                                                                                                                                                                                                                                                                                                                                                                                                                                                                                                                                                                                                                                                                                                                                                                                                                                                                                                                                                                                                                                                                                                                                                                                             |

|     |                |   |       |                                                                                                                                                                                                                                                                                                                                                                                                                                                                                                                                                                                                                                                                                                                                                                                                                                                                                                                                                                                                                                                                                                                                                                                                                                                                                                                                                                                                                                                                                                                                                                                                                                                                                                                                 |
|-----|----------------|---|-------|---------------------------------------------------------------------------------------------------------------------------------------------------------------------------------------------------------------------------------------------------------------------------------------------------------------------------------------------------------------------------------------------------------------------------------------------------------------------------------------------------------------------------------------------------------------------------------------------------------------------------------------------------------------------------------------------------------------------------------------------------------------------------------------------------------------------------------------------------------------------------------------------------------------------------------------------------------------------------------------------------------------------------------------------------------------------------------------------------------------------------------------------------------------------------------------------------------------------------------------------------------------------------------------------------------------------------------------------------------------------------------------------------------------------------------------------------------------------------------------------------------------------------------------------------------------------------------------------------------------------------------------------------------------------------------------------------------------------------------|
| 398 | 1s60A<br>(152) | C | 13.16 | <p>TM-align: aliSize=134 (resi) RMSD=2.83 (Å)<br/>lvprg---SHMDIROMNKT--HLEHWRGTRKOLWPG--GHPDdAHLADGEEITLQADHLASFIAMADGVAITGFADASIRHDYVngcds-----SPVVFEGIFLPSFRORGVAKOIIAAVO--RWGTNKGCREMASDTSPenTiSOKVHOALCFEETERVIFYRkr-----<br/>-----htlpANEFRCCLTPEDAAGVFEIEREAFISVSGNC--pLNIDEVQHFTLCPELSGLWVVEGRVAFIIGSLWDEERL---tqeslahrprGHSALHALAHRSEFRQOKGSLWRYLHVGAQPAVRAVLMCED--A-LVPFYQRFGHPAGPCATV---vgs1tftemhcs1</p> <p>SARST: aliSize=137 (resi) RMSD=6.70 (Å)<br/>lvprgsh---MDIROMNKT--HLEHWRGTRKOLWPG--GHPDdAHLADGEEITLQADHLASFIAMADGVAITGFADASIRHDYVN-----GCDSSPVVflegifLPSFRORGVAKOIIAAVORWGTN-KGCREMASDTSPEntiSOKVHOALCFEETERVIFYRKR-c<br/>-----htlpANEFRCCLTPEDAAGVFEIEREAFISVSGNCPLN--LDEVQHFTLCPELSGLWVVEGRVAFIIGSLWDEERL---tqeslahrprGHSALHALAHRSEFRQOKGSLWRYLHVGAQPAVRAVLMCEDA---LVPFYQRFGHPagpcaivgs1TFTEMHCS1-</p> <p>BLAST: aliSize=11 (resi) iden=5.26% (8/152) simi=7.24% (11/152)<br/>lvprgshmdiRqmkthlehwrglrkqlwpgHPDdahladgeeilqadhlasfiAmadgvaigfadasirhdYVngcdsSPVVF-----<br/>-----htlpANEFRCCLTPEDAAGVFEIEREAFISVSGNCPLNdevqhftlcpelSLGWVVEGRVAFIIGSLWDEERL---tqeslahrprGHSALHALAHRSEFRQOKGSLWRYLHVGAQPAVRAVLMCEDA---LVPFYQRFGHPagpcaivgs1TFTEMHCS1-</p> <p>AKOIT-----aavqrgwtnkgcremasdtspentisqkvhqaalgeeteerviFYRkr<br/>GSVLLwrylhhvgaqpavrravlmcedalvpfyqrfgHPagpcaivgs1tftemhcs1</p> <p>Proposed: aliSize=134 (resi) RMSD=2.25 (Å)<br/>lvprgs---HMDIROMNKT--HLEHWRGTRKOLWPG--GHPDdAHLADGEEITLQADHLASFIAMADGVAITGFADASIRHDYVN-----gcdsSPVVFEGIFLPSFRORGVAKOIIAAVORWGT-NKGCREMASDTSPenTiSOKVHOALCFEETERVIFYRKR-c<br/>-----htlpANEFRCCLTPEDAAGVFEIEREAFISVSGNCPLN--LDEVQHFTLCPELSLGWVVEGRVAFIIGSLWDEERL---tqeslahrpr---GHSALHALAHRSEFRQOKGSLWRYLHVGAQPAVRAVLMCED--A-LVPFYQRFGHPagpcaivgs1TFTEMHCS1-</p> |
|     | 1kuxA<br>(166) |   |       |                                                                                                                                                                                                                                                                                                                                                                                                                                                                                                                                                                                                                                                                                                                                                                                                                                                                                                                                                                                                                                                                                                                                                                                                                                                                                                                                                                                                                                                                                                                                                                                                                                                                                                                                 |

|     |                                       |   |                                                                                                                                                                                                                                                                                                                                                                                                                                                                                                                                                                                                                                                                                                                                                                                                                                                                                                                                                                                                                                                                                                                                                                                                                                                                                                                                                                                                                                                                                                                                                                                                                                                                                                                                                                                                                                                                 |
|-----|---------------------------------------|---|-----------------------------------------------------------------------------------------------------------------------------------------------------------------------------------------------------------------------------------------------------------------------------------------------------------------------------------------------------------------------------------------------------------------------------------------------------------------------------------------------------------------------------------------------------------------------------------------------------------------------------------------------------------------------------------------------------------------------------------------------------------------------------------------------------------------------------------------------------------------------------------------------------------------------------------------------------------------------------------------------------------------------------------------------------------------------------------------------------------------------------------------------------------------------------------------------------------------------------------------------------------------------------------------------------------------------------------------------------------------------------------------------------------------------------------------------------------------------------------------------------------------------------------------------------------------------------------------------------------------------------------------------------------------------------------------------------------------------------------------------------------------------------------------------------------------------------------------------------------------|
| 399 | <p>1s60A (152)</p> <p>110cA (166)</p> | C | <p>11.84</p> <p><b>TM-align:</b> aliSize=134 (resi) RMSD=2.83 (Å)<br/> lvprgsh---SHMDIROMNKTGLEHWRGLRKLQWP---GHPdd-AHLDAGEEITLQADHLASFIAMADGVAIGADASTIRHDYVNgcds-----SPVVFLEGIFLPSFRORGVAKOIAAVO-RWTKNGCREMASDTSPenTiSOKVHQAIGFEEtERVIYRkr-----<br/> -----htlpANEFRCCLTPEDAAGVFEIEREAFISvsGNC--pLNDEVOHFLTLCPELSLGFVVEGRVAFIIGSLWDEERL-----tqeslaIhrprGHSAHHALAHRSEFRQCKGSLWRYLHVGAQPAVRAVLMCED--A-LVPFFRFGFHP-AGPCAIV--vgsIftfemhcsI</p> <p><b>SARST:</b> aliSize=140 (resi) RMSD=6.66 (Å)<br/> lvprgsh---MDIROMNKTGLEHWRGLRKLQWP---LWPHDPAHLADAGEEITLQADHLASFIAMADGVAIGADASTIRHDYV-----GCDSSPVVFLLEGIFLPSFRORGVAKOIAAVORWGTNKG-CREMASDTSPenTiSOKVHQAIGFEE-----TERVIYRKR-c<br/> -----htlpANEFRCCLTPEDAAGVFEIEREafISVSINCPNLDEVOHFLTLCPELSLGFVVEGRVAFIIGSLWDEERL-----tqeslaIHRPRGHSAHHALAHRSEFRQCKGSLWRYLHVGAQPAVRAVLMCEDAL---VPPFRFGFHPagpcAivvgsITfTEMHCS1-</p> <p><b>BLAST:</b> aliSize=11 (resi) iden=5.26% (8/152) simi=7.24% (11/152)<br/> lvprgshmdiromnktglehwrgrklqwpghpddahladgeeitlqadhlasdfiamadgvaigfadasihrdyvngcdsspvvf-----htlpANEFRCCLTPEDAAGVFEIEREAFISVSGNCPNLDEVOHFLTLCPELSLGFVVEGRVAFIIGSLWDEERL-----tqeslaIhrprGHSAHHALAHRSEFRQCKGSLWRYLHVGAQPAVRAVLMCEDAL---VPPFRFGFHPagpcAivvgsITfTEMHCS1-</p> <p><b>Proposed:</b> aliSize=133 (resi) RMSD=2.29 (Å)<br/> lvprgsh---HMDIROMNKTGLEHWRGLRKLQWP---GH---pdahLDAGEEITLQADHLASFIAMADGVAIGADASTIRHDYV-----gcdsSPVVFLEGIFLPSFRORGVAKOIAAVORWGT-NKGCREMASDTSPenTiSOKVHQAIGFEEtERVI-----YRKR-----<br/> -----htlpANEFRCCLTPEDAAGVFEIEREAFISvsGNCpL---NDEVOHFLTLCPELSLGFVVEGRVAFIIGSLWDEERL-----tqeslaIhrpr---GHSAHHALAHRSEFRQCKGSLWRYLHVGAQPAVRAVLMCED--A-LVPFFRFGFHPAGPCAivvgsITfTEMHCS1-</p>                                                                                                                                                                                                      |
| 400 | <p>1s60A (152)</p> <p>1n71A (180)</p> | C | <p>13.82</p> <p><b>TM-align:</b> aliSize=132 (resi) RMSD=2.08 (Å)<br/> lvprgshDROM-NKT--HLEHWRGLRKLQWP-G-HPDPAHLADAGEEITLQADHLASFIAMADGVAIGADASTIRHDYVngcdsSPVVFLEGIFLPSFRORGVAKOIAAVORWGTNKGCREMASDTS---EN-----TISOKVHOALGFEETERVI-FYkr-----<br/> -----IIFSEFDRNNpvLKDQLSDLRLTVEEYGDSSAEVEEM-NPERIAVAVDQDELVGI-GAIPOYGIT-----ITGWEHPLVNESRRKNOIGTRVNYLEKEVASRGITTYLGDdldhgTtIsqtdlyehtfdkvasiqnlrehpyefyeklgykiVGLPnAN---gwdkpdIw</p> <p>maktiiprd</p> <p><b>SARST:</b> aliSize=104 (resi) RMSD=3.52 (Å)<br/> lvprgshDROMNKTGLEHWRGLRKLQWP---KOLWpghpDPAHLADAGEEITLQADHLASFIAMADGVAIGAdASTIRHDYVngcdsspVVFLEGIFLPSFRORGVAKOIAAVORWGTNKGCREMASDTS-----<br/> -----mIIFSEFDRNNpvLKDQLSDLRLTVEEYGDSSAEVEEM-NPERIAVAVDQDELVGI-GAIPOYGIT-----GWEHPLVNESRRKNOIGTRVNYLEKEVASRGITTYLGDdldhgTtIsqtdlyehtfdkvasiqnlrehpyefyeklgykiVGLPnANGWdkpdIw</p> <p>-----pentisqkvhqualgfeetervifyrkr-----<br/> maktiiprd</p> <p><b>BLAST:</b> aliSize=56 (resi) iden=18.42% (28/152) simi=36.84% (56/152)<br/> lvprgshmdiromnktglehwrgrklqwpghpddahladgeeitlqadhlasdfiamadgvaigfadasihrdyvngcdsspvvflegiflpsfrorgvakoiiaavorwgtnkcremasdts---en-----tisokvhoalgfeetervi-----fyrkr-----<br/> -----miisefdrnnpvlkdqsdrltveeygdssaeveem-nperiaavaVDQDELVGI-GAIPOYGIT-----ITWELHPLVNESRRKNOIGTRVNYLEKEVASRGITTYLGDdldhgTtIsqtdlyehtfdkvasiqnlrehpyefyeklgykiVGLPnANGWdkpdIw</p> <p>-----rc<br/> pnangwkdpiwmaktiiprd--</p> <p><b>Proposed:</b> aliSize=135 (resi) RMSD=1.76 (Å)<br/> lvprgshDROM-NKT--HLEHWRGLRKLQWP-G-HPDPAHLADAGEEITLQADHLASFIAMADGVAIGADASTIRHDYVngcdsS-PVVFLEGIFLPSFRORGVAKOIAAVORWGTNKGCREMASDTS---EN-----TISOKVHOALGFEETERVI-----FYKR-----<br/> -----IIFSEFDRNNpvLKDQLSDLRLTVEEYGDSSAEVEEM-NPERIAVAVDQDELVGI-GAIPOYGIT-----GITGWEHPLVNESRRKNOIGTRVNYLEKEVASRGITTYLGDdldhgTtIsqtdlyehtfdkvasiqnlrehpyefyeklgykiVGLPnANGWdkpdIwMAK</p> <p>C-----c<br/> Tiiprdc-</p> |
| 401 | <p>1s60A (152)</p> <p>1n71B (179)</p> | C | <p>13.82</p> <p><b>TM-align:</b> aliSize=132 (resi) RMSD=2.13 (Å)<br/> lvprgshDROM-NKT--HLEHWRGLRKLQWP-G-HPDPAHLADAGEEITLQADHLASFIAMADGVAIGADASTIRHDYVngcdsSPVVFLEGIFLPSFRORGVAKOIAAVORWGTNKGCREMASDTS---EN-----TISOKVHOALGFEETERVI-FYkr-----<br/> -----IIFSEFDRNNpvLKDQLSDLRLTVEEYGDSSAEVEEM-NPERIAVAVDQDELVGI-GAIPOYGIT-----ITGWEHPLVNESRRKNOIGTRVNYLEKEVASRGITTYLGDdldhgTtIsqtdlyehtfdkvasiqnlrehpyefyeklgykiVGLPnAN---gwdkpdIw</p> <p>maktiiprd</p> <p><b>SARST:</b> aliSize=105 (resi) RMSD=3.41 (Å)<br/> lvprgshDROMNKTGLEHWRGLRKLQWPghpDD---AHLADAGEEITLQADHLASFIAMADGVAIGAdASTIRHDYVngcdsspVVFLEGIFLPSFRORGVAKOIAAVORWGTNKGCREMASDTS-----<br/> -----mIIFSEFDRNNpvLKDQLSDLRLTVEEYGDSSAEVEEM-NPERIAVAVDQDELVGI-GAIPOYGIT-----GWEHPLVNESRRKNOIGTRVNYLEKEVASRGITTYLGDdldhgTtIsqtdlyehtfdkvasiqnlrehpyefyeklgykiVGLPnANGWdkpdIw</p> <p>-----pentisqkvhqualgfeetervifyrkr-----<br/> aktiiprd</p> <p><b>BLAST:</b> aliSize=56 (resi) iden=18.42% (28/152) simi=36.84% (56/152)<br/> lvprgshmdiromnktglehwrgrklqwpghpddahladgeeitlqadhlasdfiamadgvaigfadasihrdyvngcdsspvvflegiflpsfrorgvakoiiaavorwgtnkcremasdts---en-----tisokvhoalgfeetervi-----fyrkr-----<br/> -----miisefdrnnpvlkdqsdrltveeygdssaeveem-nperiaavaVDQDELVGI-GAIPOYGIT-----ITWELHPLVNESRRKNOIGTRVNYLEKEVASRGITTYLGDdldhgTtIsqtdlyehtfdkvasiqnlrehpyefyeklgykiVGLPnANGWdkpdIw</p> <p>-----rc<br/> pnangwkdpiwmaktiiprd--</p> <p><b>Proposed:</b> aliSize=135 (resi) RMSD=1.84 (Å)<br/> lvprgshDROM-NKT--HLEHWRGLRKLQWP-G-HPDPAHLADAGEEITLQADHLASFIAMADGVAIGADASTIRHDYVngcdsS-PVVFLEGIFLPSFRORGVAKOIAAVORWGTNKGCREMASDTS---EN-----TISOKVHOALGFEETERVI-----FYKR-----<br/> -----IIFSEFDRNNpvLKDQLSDLRLTVEEYGDSSAEVEEM-NPERIAVAVDQDELVGI-GAIPOYGIT-----GITGWEHPLVNESRRKNOIGTRVNYLEKEVASRGITTYLGDdldhgTtIsqtdlyehtfdkvasiqnlrehpyefyeklgykiVGLPnANGWdkpdIwMAK</p> <p>-----c<br/> tiiprdc-</p>        |

|     |             |   |       |                                                                                                                                                                                                                                                                                                                                                                                                                                                                                                                                                                                                                                                                                                                                                                                                                                                                                                                                                                                                                                                                                                                                                                                                                                                                                                                                                                                                                                                                                                                                                                                                                                                                                                                                                                                                                                                                                                                                                                                                          |
|-----|-------------|---|-------|----------------------------------------------------------------------------------------------------------------------------------------------------------------------------------------------------------------------------------------------------------------------------------------------------------------------------------------------------------------------------------------------------------------------------------------------------------------------------------------------------------------------------------------------------------------------------------------------------------------------------------------------------------------------------------------------------------------------------------------------------------------------------------------------------------------------------------------------------------------------------------------------------------------------------------------------------------------------------------------------------------------------------------------------------------------------------------------------------------------------------------------------------------------------------------------------------------------------------------------------------------------------------------------------------------------------------------------------------------------------------------------------------------------------------------------------------------------------------------------------------------------------------------------------------------------------------------------------------------------------------------------------------------------------------------------------------------------------------------------------------------------------------------------------------------------------------------------------------------------------------------------------------------------------------------------------------------------------------------------------------------|
| 402 | 1s60A (152) | C | 7.89  | <p><b>TM-align:</b> aliSize=124 (resi) RMSD=3.02 (Å)<br/> lvprgshmdiromn---K-TLHEHWGRGIRKOLW---GHPDDAHLADGEEI lqAdhLASFIAMAD-GVAIGFADASIRHdyvngcdsSPVVFLEGIIFVLPSPFRORVAKOLI AAVORWGTNKGCREMASDTSPEntiSOKVHOALGFEETR-----RVIFyrkrc-----<br/> -----LDFDILTndgThrNMKLLIDLKNIFSRQLPKMKEY-IVKLVF-DR--H--HESMVLKKNKQKVICGICFRQYKP-----QRFAEVAFLAVTANEQVRYGTRLMNFKDHMOKONIEYLLTYADN--F-AIGYFKKQGTKEHrmpqekwkyikDYDG----gtlmecyihpyvdg</p> <p><b>SARST:</b> aliSize=115 (resi) RMSD=6.35 (Å)<br/> lvprgshmdirqmknkth-----LHWGRGIRKOLW---GHPDDAHLADGEEI lqAdhLASFIAMAD-GVAIGFADASIR--HdyvngcdsSPVVFLEGIIFVLPSPFRORVAKOLI AAVORWGTNKGCREMASDTSPEntiSOKVHOALGFEETR-----RVIFyrkrc-----<br/> -----ldfdiltndgthrmnkllidLKNIFSRQLPKM-----KEYIVKLVFDRHESMVLKKNKQKVICGICFRQYKPQ---RF----AEVAFLAVTANEQVRYGTRLMNFKDHMOKONIEYLLTYADN--F-AIGYFKKQGTKEHrmpqekwkyikdydgGLMECYi</p> <p>-----c<br/> hpyvdg-</p> <p><b>BLAST:</b> aliSize=11 (resi) iden=3.95% (6/152) simi=7.24% (11/152)<br/> lvprgshmdirqmknkthlehwgrlqkqwpghpddahladgee-----LDADHLASFIAMADGVAIGF-----<br/> -----ldfdiltndgthrmnkllidLKNIFSRQLPKMKEYIVKLVFDRHESMVLKKNKQKVICGICFRQYKQRFAEVAFLAVTANEQVRYGTRLMNFKDHMOKONIEYLLTYADN--F-AIGYFKKQGTKEHrmpqekwkyikdydg</p> <p>-----adasirhdyvngcdsSPVVFLEGIIFVLPSPFRORVAKOLI AAVORWGTNKGCREMASDTSPEntisqkvhqlgfeetervifyrkrc<br/> glmeciypvydg-----</p> <p><b>Proposed:</b> aliSize=129 (resi) RMSD=2.40 (Å)<br/> lvprgshmdiromn---KT-HLEHWGRGIRKOLW---GHPDDAHLADGEEI lqAdhLASFIAMAD-GVAIGFADASIR-HdyvngcdsSPVVFLEGIIFVLPSPFRORVAKOLI AAVORWGTNKGCREMASDTSPEntiSOKVHOALGFEETR-----RVIFyrkrc-----c<br/> -----LDFDILTndgthrNMKLLIDLKNIFSRQLPKMKEY-IVKLVFDR--RH--HESMVLKKNKQKVICGICFRQYKP-----QRFAEVAFLAVTANEQVRYGTRLMNFKDHMOKONIEYLLTYADN--F-AIGYFKKQGTKEHrmpqekwkyikdydgGLMECYiHPvydgc-</p>                                                                                                                                                                                                                            |
| 403 | 1s60A (152) | C | 11.84 | <p><b>TM-align:</b> aliSize=136 (resi) RMSD=2.64 (Å)<br/> lvprg-----SHMDIROMNKTLEHWGRGIRK--O---GHPDD--AHLADGEEILOA--D-HLASFIAMADGVAIGFADASIRHdyvngcdsSPVVFLEGIIFVLPSPFRORVAKOLI AAVORWGT-NKGCREMASDTSPEntiSOKVHOALGFEETERVIFyrkrc-----<br/> -----veiiipvsITLELRAADESVPALHQLVknkawlqqsldwPQYVTSqeETRKHVQGNILLhqRgYAKMYLIFCQNEMLVLSFNAIPEP-----INKAAYI-GYWLDESFGQGLMSLSLOALMTHYARRGDIRRFVVKCRVDNQAASNAARRNHFTLEGCMKqAE---yIngdyhdvnmmyariida</p> <p><b>SARST:</b> aliSize=129 (resi) RMSD=3.97 (Å)<br/> lvprgs-----HMDIROMNKTLEHWGRGIRK--O---GHPDD--AHLADGEEILOA--D-HLASFIAMADGVAIGFADASIRHdyvngcdsSPVVFLEGIIFVLPSPFRORVAKOLI AAVORWGTNKGCREMASDTSPEntiSOKVHOALGFEETERVIFyrkrc-----<br/> -----veiiipvsITLELRAADESVPALHQLVknkawlqqsldwPQYVTSqeETRKHVQGNILLhqRgYAKMYLIFCQNEMLVLSFNAIPEP-----FNAIepinkAAYI-GYWLDESFGQGLMSLSLOALMTHYARRGDIRRFVVKCRVDNQAASNAARRNHFTLEGCMKqAeyIngdyhdvnmmyar</p> <p>----fyrkrc<br/> iida-----</p> <p><b>BLAST:</b> aliSize=7 (resi) iden=3.95% (6/152) simi=4.61% (7/152)<br/> lvprgshmdirqmknkthlehwgrlqkqwpghpddahladgeeilqadhlasfiamadgvaigfadasirhdyvngcdsSPVVFLEGIIFVLPSPFRORVAKOLI AAVORWGT-NKGCREMASDTSPEntisqkvhqlgfeetervifyrkrc<br/> -----veiiipvsttlelraadeshvpalhqlvknkawlqqsldwPQYVTSqeETRKHVQGNILLhqRgYAKMYLIFCQNEMLVLSFNAIPEP-----veiiipvsttlelraadeshvpalhqlvknkawlqqsldwPQYVTSqeETRKHVQGNILLhqRgYAKMYLIFCQNEMLVLSFNAIPEP-----ORVAKOLI AAV-----<br/> -----gywldesfgqgimsqslqalmthyarrgdirrfvkrvdnqasnavarrnhftlegcmkqaeayIngdyhdvnmmyariida-----rwgtngcremasdtspentisqkvhqlgfeetervifyrkrc</p> <p><b>Proposed:</b> aliSize=137 (resi) RMSD=2.18 (Å)<br/> lvprgs-----HMDIROMNKTLEHWGRGIRK--O---GHPDD--AHLADGEEILOA--D-HLASFIAMADGVAIGFADASIRHdyvngcdsSPVVFLEGIIFVLPSPFRORVAKOLI AAVORWGT-NKGCREMASDTSPEntiSOKVHOALGFEETERVIFyrkrc-----<br/> -----veiiipvsITLELRAADESVPALHQLVknkawlqqsldwPQYVTSqeETRKHVQGNILLhqRgYAKMYLIFCQNEMLVLSFNAIPEP-----NKAAAYI-GYWLDESFGQGLMSLSLOALMTHYARRGDIRRFVVKCRVDNQAASNAARRNHFTLEGCMKqAeyIngdyhdvnmmyariida</p> <p>---c<br/> dac-</p> |
| 404 | 1s60A (152) | C | 11.84 | <p><b>TM-align:</b> aliSize=136 (resi) RMSD=2.63 (Å)<br/> lvprg-----SHMDIROMNKTLEHWGRGIRK--O---GHPDD--AHLADGEEILOA--D-HLASFIAMADGVAIGFADASIRHdyvngcdsSPVVFLEGIIFVLPSPFRORVAKOLI AAVORWGT-NKGCREMASDTSPEntiSOKVHOALGFEETERVIFyrkrc-----<br/> -----eiiipvsITLELRAADESVPALHQLVknkawlqqsldwPQYVTSqeETRKHVQGNILLhqRgYAKMYLIFCQNEMLVLSFNAIPEP-----INKAAYI-GYWLDESFGQGLMSLSLOALMTHYARRGDIRRFVVKCRVDNQAASNAARRNHFTLEGCMKqAE---yIngdyhdvnmmyariidad</p> <p><b>SARST:</b> aliSize=127 (resi) RMSD=3.94 (Å)<br/> lvprgs-----HMDIROMNKTLEHWGRGIRK--O---GHPDD--AHLADGEEILOA--D-HLASFIAMADGVAIGFADASIRHdyvngcdsSPVVFLEGIIFVLPSPFRORVAKOLI AAVORWGTNKGCREMASDTSPEntiSOKVHOALGFEETERVIFyrkrc-----<br/> -----eiiipvsttlelraadeshvpalhqlvknkawlqqsldwPQYVTSqeETRKHVQGNILLhqRgYAKMYLIFCQNEMLVLSFNAIPEP-----FNAIepinkAAYI-GYWLDESFGQGLMSLSLOALMTHYARRGDIRRFVVKCRVDNQAASNAARRNHFTLEGCMKqAeyIngdyhdvnmmyar</p> <p>-----fyrkrc<br/> riidad-----</p> <p><b>BLAST:</b> aliSize=7 (resi) iden=3.95% (6/152) simi=4.61% (7/152)<br/> lvprgshmdirqmknkthlehwgrlqkqwpghpddahladgeeilqadhlasfiamadgvaigfadasirhdyvngcdsSPVVFLEGIIFVLPSPFRORVAKOLI AAVORWGT-NKGCREMASDTSPEntisqkvhqlgfeetervifyrkrc<br/> -----eiiipvsttlelraadeshvpalhqlvknkawlqqsldwPQYVTSqeETRKHVQGNILLhqRgYAKMYLIFCQNEMLVLSFNAIPEP-----veiiipvsttlelraadeshvpalhqlvknkawlqqsldwPQYVTSqeETRKHVQGNILLhqRgYAKMYLIFCQNEMLVLSFNAIPEP-----ORVAKOLI AAV-----<br/> -----ywl desfgqgimsqslqalmthyarrgdirrfvkrvdnqasnavarrnhftlegcmkqaeayIngdyhdvnmmyariidad-----</p> <p><b>Proposed:</b> aliSize=137 (resi) RMSD=2.19 (Å)<br/> lvprgs-----HMDIROMNKTLEHWGRGIRK--O---GHPDD--AHLADGEEILOA--D-HLASFIAMADGVAIGFADASIRHdyvngcdsSPVVFLEGIIFVLPSPFRORVAKOLI AAVORWGT-NKGCREMASDTSPEntiSOKVHOALGFEETERVIFyrkrc-----<br/> -----eiiipvsttlelraadeshvpalhqlvknkawlqqsldwPQYVTSqeETRKHVQGNILLhqRgYAKMYLIFCQNEMLVLSFNAIPEP-----NKAAAYI-GYWLDESFGQGLMSLSLOALMTHYARRGDIRRFVVKCRVDNQAASNAARRNHFTLEGCMKqAeyIngdyhdvnmmyariida</p> <p>---c<br/> adc-</p>                                        |

|     |                                       |   |                                                                                                                                                                                                                                                                                                                                                                                                                                                                                                                                                                                                                                                                                                                                                                                                                                                                                                                                                                                                                                                                                                                                                                                                                                                                                                                                                                                                                                                                                                                                                                                                                                                                       |
|-----|---------------------------------------|---|-----------------------------------------------------------------------------------------------------------------------------------------------------------------------------------------------------------------------------------------------------------------------------------------------------------------------------------------------------------------------------------------------------------------------------------------------------------------------------------------------------------------------------------------------------------------------------------------------------------------------------------------------------------------------------------------------------------------------------------------------------------------------------------------------------------------------------------------------------------------------------------------------------------------------------------------------------------------------------------------------------------------------------------------------------------------------------------------------------------------------------------------------------------------------------------------------------------------------------------------------------------------------------------------------------------------------------------------------------------------------------------------------------------------------------------------------------------------------------------------------------------------------------------------------------------------------------------------------------------------------------------------------------------------------|
| 405 | <p>1s60A (152)</p> <p>1wzB (157)</p>  | C | <p>11.18</p> <p><b>TM-align:</b> aliSize=136 (resi) RMSD=2.63 (Å)<br/> lvprgsHMDROM-NKT--HFEHWRLRKOLW--P--G--HPDAHLADGEEILOAdHL-ASFIAMADGVAIGFADAS-IRHDYVngCdSSPVFLEGIFFLPSFRORVAKOLI AAVORWGTNkGCREMASDTSPEntISOKVHOALGFEETERVIFyrkr-----<br/> -----EIKLEKlKLDkkaNELIDVYMSGYegLeeYggGRYARNYIKWCWKK-ASdGFVAVKVGDKIVGFI VCDkDFWFSKY--E-GRVGAIHFEVVDKKIQGKIGRKLITCLDFLGK-YNDTIELWVGEKYGAMNLYEKFGH-KKVGKSGI---wvrmiqrnl</p> <p><b>SARST:</b> aliSize=139 (resi) RMSD=6.23 (Å)<br/> lvprgshmdrom-nkt--hfehwrlrkolw--p--g--hpdahladgeeiloadhlasfiamadgvaigfadasi rhdyvngcdsspvflegifflpsfrorvakoli aavorwgtngcremasdtspe ntisokvhoal gfeete---rvi fyrkr--c<br/> -----eikleklkldkkaNELIDVYMSGYegLeeYgggrdyARNYIKWCWKKASD-GFVAVKVGDKIVGFI VCDkDFWFSKYEGRTVGAIHFEVVDKKIQGKIGRKLITCLDFLGK-YNDTIELWVGEKYGAMNLYEKFGH-KKVGKSGIwvrmiqrnl</p> <p><b>BLAST:</b> aliSize=37 (resi) iden=14.47% (22/152) simi=24.34% (37/152)<br/> lvprgshmdi rqnkthlehwrlrkqlwpghpddahladgeeilqadhlasfiamadgvaigfadasi rhdyvngcdsspvflegifflpsfrorvakoli aavorwgtngcremasdtspe ntisokvhoal gfeete---rvi fyrkr--c<br/> -----eikleklkldkkaNELIDVYMSGYegLeeYgggrdyARNYIKWCWKKASD-GFVAVKVGDKIVGFI VCDkDFWFSKYEGRTVGAIHFEVVDKKIQGKIGRKLITCLDFLGK-YNDTIELWVGEKYGAMNLYEKFGH-KKVGKSGIwvrmiqrnl</p> <p><b>Proposed:</b> aliSize=139 (resi) RMSD=2.36 (Å)<br/> lvprgsHMDROM-NKT--HFEHWRLRKOLW-PG--H--PDVAHLADGEEILOAdHL-ASFIAMADGVAIGFADAS-IRHDYVngC-dsSPVVFLEGIFFLPSFRORVAKOLI AAVORWGTNkGCREMASDTSPEntISOKVHOALGFEETERVIFyrkr--c<br/> -----EIKLEKlKLDkkaNELIDVYMSGYegLeeYggGRYARNYIKWCWKK-ASdGFVAVKVGDKIVGFI VCDkDFWFSKY--Eg--RIVGAIHFEVVDKKIQGKIGRKLITCLDFLGK-YNDTIELWVGEKYGAMNLYEKFGH-KKVGKSGIwvrmiqrnl</p> |
| 406 | <p>1s60A (152)</p> <p>1y9wA (140)</p> | N | <p>11.43</p> <p><b>TM-align:</b> aliSize=90 (resi) RMSD=2.32 (Å)<br/> lvprgshmdi rqnkthlehwrlrkqlwpghpddahladgeeilq-----ADHLASFIAMADG-VAIGFADASTRHdyvngcdssPVVLEGIFFLPSFRORVAKOLI AAVORWGTNkGCREMASDTSPEntISOKVHOALGFEETERVIFyrkr-----<br/> -----mymkhiengtriegeyiknkviqynmsiltdevkqpmEEVSLVVKNEegKIFGVTGTMYF-----YHLHIDFLWDESVVHDYGSOLLHEIEGIAKEKGCRLILLDF-SF-QAPEFYKHHYREYGVEdH-----p</p> <p>kgshqhfekrl</p> <p><b>SARST:</b> aliSize=102 (resi) RMSD=7.21 (Å)<br/> lvprgshmdi rqnkthlehwrlrkqlwpghp-----DDAHLADGEEILO--ADH-----LASFIAMA-DVAIGFADASTRHdyvngcdsspvflegifflpsfrorvakoli aavorwgtngcremasdtspe ntisokvhoal gfeete---rvi fyrkr--c<br/> -----mymkhiengtriegEYIKNKVIOYNMSILTDevkqpmEEVSLVVKNEegKIFGVTGTMYF---YH-----LHIDFLWDESVVHDYGSOLLHEIEGIAKEKGCRLILLDF-SF-QAPEFYKHHYREYGVEdhpkghsqhfekrl-----</p> <p><b>BLAST:</b> aliSize=20 (resi) iden=7.86% (11/140) simi=14.29% (20/140)<br/> lvprgshmdi rqnkthlehwrlrkqlwpghpddahladgeeilqadhlasfiamadgvaigfadasi rhdyvngcdsspvvf-----mymkhiengtriegeyiknkviqynmsiltdevkqpmEEVSLVVKNEegkifgvtgtmyfhlhIDFLWDESVVHDYGSOLLHEIEGIAKEKGCRLILLDFsf</p> <p>-----spentisqkvhalgfeetervifyrkr<br/> fqapefykhhgyreygvvedhpkghsqhfekrl-----</p> <p><b>Proposed:</b> aliSize=113 (resi) RMSD=1.95 (Å)<br/> lvprgshmdi rqnkthlehwrlrkqlwpghpddahladgeeilqadhlasfiamadg--VAIGFADASTRHdyvngcdssPVVLEGIFFLPSFRORVAKOLI AAVORWGTNkGCREMASDTSPEntISOKVHOALGFEETERVIFyrkr--c<br/> -----M--YMKHIengtrie-----GEYIKNKVIOYNMSILTDevkq-PM-----EEVSLVVKNEegKIFGVTGTMYF-----YHLHIDFLWDESVVHDYGSOLLHEIEGIAKEKGCRLILLDF-SF-QAPEFYKHHYREYGVEdhpkghsqhfekrl-----</p>                                                                         |
| 407 | <p>1s60A (152)</p> <p>1y9wA (140)</p> | C | <p>12.86</p> <p><b>TM-align:</b> aliSize=90 (resi) RMSD=2.32 (Å)<br/> lvprgshmdi rqnkthlehwrlrkqlwpghpddahladgeeilq-----ADHLASFIAMADG-VAIGFADASTRHdyvngcdssPVVLEGIFFLPSFRORVAKOLI AAVORWGTNkGCREMASDTSPEntISOKVHOALGFEETERVIFyrkr-----<br/> -----mymkhiengtriegeyiknkviqynmsiltdevkqpmEEVSLVVKNEegKIFGVTGTMYF-----YHLHIDFLWDESVVHDYGSOLLHEIEGIAKEKGCRLILLDF-SF-QAPEFYKHHYREYGVEdH-----p</p> <p>kgshqhfekrl</p> <p><b>SARST:</b> aliSize=102 (resi) RMSD=7.21 (Å)<br/> lvprgshmdi rqnkthlehwrlrkqlwpghp-----DDAHLADGEEILO--ADH-----LASFIAMA-DVAIGFADASTRHdyvngcdsspvflegifflpsfrorvakoli aavorwgtngcremasdtspe ntisokvhoal gfeete---rvi fyrkr--c<br/> -----mymkhiengtriegEYIKNKVIOYNMSILTDevkqpmEEVSLVVKNEegKIFGVTGTMYF---YH-----LHIDFLWDESVVHDYGSOLLHEIEGIAKEKGCRLILLDF-SF-QAPEFYKHHYREYGVEdhpkghsqhfekrl-----</p> <p><b>BLAST:</b> aliSize=20 (resi) iden=7.86% (11/140) simi=14.29% (20/140)<br/> lvprgshmdi rqnkthlehwrlrkqlwpghpddahladgeeilqadhlasfiamadgvaigfadasi rhdyvngcdsspvvf-----mymkhiengtriegeyiknkviqynmsiltdevkqpmEEVSLVVKNEegkifgvtgtmyfhlhIDFLWDESVVHDYGSOLLHEIEGIAKEKGCRLILLDFsf</p> <p>-----spentisqkvhalgfeete rvi fyrkr<br/> fqapefykhhgyreygvvedhpkghsqhfekrl-----</p> <p><b>Proposed:</b> aliSize=93 (resi) RMSD=1.50 (Å)<br/> lvprgshmdi rqnkthlehwrlrkqlwpghpddahladgeeilq-----DHLASFIAMADG--VAIGFADASTRHdyvngcdssPVVLEGIFFLPSFRORVAKOLI AAVORWGTNkGCREMASDTSPEntISOKVHOALGFEETERVIFyrkr--c<br/> -----mymkhiengtriegeyiknkviqynmsiltdevkqpmEEVSLVVKNEegKIFGVTGTMYF-----YHLHIDFLWDESVVHDYGSOLLHEIEGIAKEKGCRLILLDF-SF-QAPEFYKHHYREYGVEdhpkgh</p> <p>-VIFYRKRCC<br/> SQHFEEKRL-</p>                                                            |



|     |                                             |   |       |                                                                                                                                                                                                                                                                                                                                                                                                                                                                                                                                                                                                                                                                                                                                                                                                                                                                                                                                                                                                                                                                                                                                                                                                                                                                                                                                                                                                                                                                                                                                                                                                                                                                                                                                                                                                                                                                                                                                  |
|-----|---------------------------------------------|---|-------|----------------------------------------------------------------------------------------------------------------------------------------------------------------------------------------------------------------------------------------------------------------------------------------------------------------------------------------------------------------------------------------------------------------------------------------------------------------------------------------------------------------------------------------------------------------------------------------------------------------------------------------------------------------------------------------------------------------------------------------------------------------------------------------------------------------------------------------------------------------------------------------------------------------------------------------------------------------------------------------------------------------------------------------------------------------------------------------------------------------------------------------------------------------------------------------------------------------------------------------------------------------------------------------------------------------------------------------------------------------------------------------------------------------------------------------------------------------------------------------------------------------------------------------------------------------------------------------------------------------------------------------------------------------------------------------------------------------------------------------------------------------------------------------------------------------------------------------------------------------------------------------------------------------------------------|
| 408 | <p>1s60A (152)</p> <hr/> <p>1yx0A (151)</p> | C | 11.92 | <p><b>TM-align:</b> aliSize=122 (resi) RMSD=3.24 (Å)<br/> lvprgshMDIROMNKtHLEHWRGLRKOLWP-----G-HPddAHl-ADgeEIqAdhLASFIIMADGVAIGFADASIRHdyvngcdsSPVVFLEGI FVLP-SFRqRQVAKOLIAAVORWGTNKC CREMASDTSPE--NTISOKVHOALGFEE TERV--IFYrkrc-----<br/> -----MHKIDDL-TGROVVSIVNEHLHsmt lmsppesiHaLG--LE-kLR--GP--E--ITFWSWEGDELAGCGALKELD-----TRHGETKSMRTSAsHLR-KGVAKQVLQHIIEEAEKRCYERLSLETGSMASFEFARKLYESFGFOYCEPFadyGE----dpsvfmtkkl</p> <p><b>SARST:</b> aliSize=97 (resi) RMSD=9.91 (Å)<br/> lvp-----RGSMDIRqmnkthlehwgrlkrqlwpghpddahladgeeilqadhlasfiIMADGVAIGFADASIRHdyvNGCDSSPVVfLeGIFVLPFRORGVAKOLIAAVORWGTNKC CREMASDTS--PENTISOKVHOALGFEE-----<br/> ---mhikiddltgrqvsvlnehlsmt lmsppesiha gl eklrGPEITFWS-----WEGDELAGCGALK-----ELDTRHGEIK--SMRTSAsHLRQVAKQVLQHIIEEAEKRCYERLSLETGsmASFEFARKLYESFGFOYcepfa</p> <p>TERV---IFYRKR--c<br/> DYGEDp nSVFMTkkl-</p> <p><b>BLAST:</b> aliSize=56 (resi) iden=19.87% (30/151) simi=37.09% (56/151)<br/> lvprgshmdi-----ROMNKtHLEHWRGLRKOLWP-----G-HPddAHl-ADgeEIqAdhLASFIIMADGVAIGFADASIRHdyvNGCDSSpvvflegifvlpFRORGVAKOLIAAVORWGTNKC CREMASDTSPE--NTISOKVHOALGFEE T-----rvi fykrcc<br/> -----mhikiddltgrqvsvlnehlsmt lmsppesiha gl eklrGPEITFWSWEGDELAGCGALKELD-----TRHGETKSMRTSAsHLR-KGVAKQVLQHIIEEAEKRCYERLSLETGSMASFEFARKLYESFGFOYCEPFadygedpsvfmtkkl-----</p> <p><b>Proposed:</b> aliSize=121 (resi) RMSD=2.48 (Å)<br/> lvprgshMDIROMNKtHLEHWRGLRKOLWP-----G-HPddAHl-ADgeEIqAdhLASFIIMADGVAIGFADASIRHdyvngcdsSPVVFLEGI FVLP-SFRqRQVAKOLIAAVORWGTNKC CREMASDTSPE--NTISOKVHOALGFEE T-----E-RVIIFYRKRCC<br/> -----MHKIDDL-TGROVVSIVNEHLHsmt lmsppesihaLg--L--EkL-RG--P--E--ITFWSWEGDELAGCGALKELD-----TRHGETKSMRTSAsHLR-KGVAKQVLQHIIEEAEKRCYERLSLETGSMASFEFARKLYESFGFOYCEPFadygeDpNSVMTKkl-</p>                                                                                                                                                                                            |
| 409 | <p>1s60A (152)</p> <hr/> <p>2cntA (151)</p> | C | 14.57 | <p><b>TM-align:</b> aliSize=127 (resi) RMSD=2.30 (Å)<br/> lvprgshMDIROMNKtHLEHWRGLRKOLWP-----G-HPddAHl-ADgeEIqAdhLASFIIMADGVAIGFADASIRHdyvngcdsSPVVFLEGI FVLP-SFRqRQVAKOLIAAVORWGTNKC CREMASDTSPE--NTISOKVHOALGFEE TERVI-FYrkrc-----<br/> -----MNTISLSTIDLPAAWQIEORaHaFPWSE--KTFFG--NQ-GE-RYLNKLTADDRMAAFITQVVL-----DEATFNIAADDFORRGLGRMLEHLIDELETRCVVTLWLEVRASNAAIALYESLGFNEATIRRaYY---ptaqghedaaimalpismklh</p> <p><b>SARST:</b> aliSize=126 (resi) RMSD=2.52 (Å)<br/> lvprgshMDIROMNKtHLEHWRGLRKOLWP-----G-HPddAHl-ADgeEIqAdhLASFIIMADGVAIGFADASIRHdyvngcdsSPVVFLEGI FVLP-SFRqRQVAKOLIAAVORWGTNKC CREMASDTSPE--NTISOKVHOALGFEE TERVI-----fykrcc<br/> -----mNTISLSTIDLPAAWQIEORaHaFPWSE--KTFFG--NQ-GE-RYLNKLTADDRMAAFITQVVL-----LDEATFNIAADDFORRGLGRMLEHLIDELETRCVVTLWLEVRASNAAIALYESLGFNEATIRRaYY---ptaqghedaaimalpismklh-----</p> <p><b>BLAST:</b> aliSize=43 (resi) iden=15.89% (24/151) simi=28.48% (43/151)<br/> lvprgshmdi rqnkthlehwgrlkrqlwpghpddahladgeeil-----ADHLSFIAMADGVAIGFADASIRHdyvngcdsSPVVFleGIFVLP-SFRqRQVAKOLIA-AVORWGTNKC CREMASDTSPE--NTISOKVHOALGFEE-TERVI-FY-----<br/> -----mntisilsttdlpaaqieqrhafpws ek t f f g n GERYLNKLTADDRMAAFITQVVL-----EATLFNIAADDFORRGLGRMLEHLIDELETRCVVTLWLEVRASNAAIALYESLGFNEATIRRaYY---ptaqghedaaimalpismklh-----</p> <p>-----rkrcc<br/> hedaiimalpismklh-----</p> <p><b>Proposed:</b> aliSize=130 (resi) RMSD=1.91 (Å)<br/> lvprgshMDIROMNKtHLEHWRGLRKOLWP-----G-HPddAHl-ADgeEIqAdhLASFIAMADGVAIGFADASIRHdyvngcdsSPVVFLEGI FVLP-SFRqRQVAKOLIAAVORWGTNKC CREMASDTSPE--NTISOKVHOALGFEE TERVI-----IFYRKRCC-----c<br/> -----MNTISLSTIDLPAAWQIEORaHaFPWSE--KTFFG--NQ-GE-RYLNKLTADDRMAAFITQVVL-----DEATFNIAADDFORRGLGRMLEHLIDELETRCVVTLWLEVRASNAAIALYESLGFNEATIRRaYY---ptaqghedaaimalpismklh-----</p>                                                                                                                                                                          |
| 410 | <p>1s60A (152)</p> <hr/> <p>2j8mA (171)</p> | C | 17.76 | <p><b>TM-align:</b> aliSize=136 (resi) RMSD=2.57 (Å)<br/> lvprgshMDIROMNKtHLEHWRGLRKOLWP-----GHDDahLADGEEILOaDHLASFIAMADGVAIGFADASIRHdyvngc-DSSPVVfLeGIFVLP-SFRqRQVAKOLIAAVORWGTNKC CREMASDTSPE--NTISOKVHOALGFEE TERVI-FYrkrc-----<br/> -----SASIRDAGVADLPGILAIYNDAGvntaiwneTIVV-LANRQAWFDARARQGYPILVASDAAGEVLYASYGDWRPF-----eGFRGTVEH-SVYVRDDQKGLGVOLLOALIERARAOQLHVVAAIESGNAASIGLHRRLGFEISGOMPqVQKfgwldl t f m q l n d p t r s a p</p> <p><b>SARST:</b> aliSize=133 (resi) RMSD=4.05 (Å)<br/> lvprgshMDIROMNKtHLEHWRGLRKOLWP-----QLW--PGHPDDAHLADGEEILOaDHLASFIAMADGVAIGFADASIRHdyvngc---DSSPVVfLeGIFVLP-SFRqRQVAKOLIAAVORWGTNKC CREMASDTSPE--NTISOKVHOALGFEE TERVI--FYR-----krcc<br/> -----SASIRDAGVADLPGILAIYNDAGvntaiwneTPVDLANRQAWFDARARQGYPILVASDAAGEVLYASYGDWRPF-----DWRPFegfrGTVEH---SVYVRDDQKGLGVOLLOALIERARAOQLHVVAAIESGNAASIGLHRRLGFEISGOMPqVQKfgwldl t f m q l n d p t r s a p</p> <p><b>BLAST:</b> aliSize=25 (resi) iden=9.87% (15/152) simi=16.45% (25/152)<br/> lvprgshmdi rqnkthlehwgrlkrqlwpghpddahladgeeilqadhlasfi amadgvaigfadasirhdyvngcdsspvvfleg-----sasi rdagvadlpgilaiyndavgn t aiwne t p v d l a n r q a w f d a r a r q g y p i l v a s d a a g e v l y a s y g d w r p f e g f r g t v e h s VYVRDDQKGLGVOLLOALIERARAOQLHVVAAIESGNAASIGLHRRLGFEISGOMPqVQKfgwldl t f m q l n d p t r s a p</p> <p>AIVORWGTNKC CREMASDTSPE--NTISOKVHOALGFEE-----eterVIIFYRKRCC<br/> QALIERARAOQLHVVAAIESGNAASIGLHRRLGFEISGOMPqVQKfgwldl t f m q l n d p t r s a p</p> <p><b>Proposed:</b> aliSize=137 (resi) RMSD=2.06 (Å)<br/> lvprgshMDIROMNKtHLEHWRGLRKOLWP-----GHDDahLADGEEILOaDHLASFIAMADGVAIGFADASIRHdyvngcdsSPVVFleGIFVLP-SFRqRQVAKOLIAAVORWGTNKC CREMASDTSPE--NTISOKVHOALGFEE TERVI-----IFYRKRCC-----c<br/> -----SASIRDAGVADLPGILAIYNDAGvntaiwneTIVV-LANRQAWFDARARQGYPILVASDAAGEVLYASYGDWRPFegf-----RGTVEH-SVYVRDDQKGLGVOLLOALIERARAOQLHVVAAIESGNAASIGLHRRLGFEISGOMPqVQKfgwldl t f m q l n d p t r s a p</p> |

|     |                                               |   |                                                                                                                                                                                                                                                                                                                                                                                                                                                                                                                                                                                                                                                                                                                                                                                                                                                                                                                                                                                                                                                                                                                                                                                                                                                                                                                                                                                                                                                                                                                                                                                                                                                                                                                                                                                           |
|-----|-----------------------------------------------|---|-------------------------------------------------------------------------------------------------------------------------------------------------------------------------------------------------------------------------------------------------------------------------------------------------------------------------------------------------------------------------------------------------------------------------------------------------------------------------------------------------------------------------------------------------------------------------------------------------------------------------------------------------------------------------------------------------------------------------------------------------------------------------------------------------------------------------------------------------------------------------------------------------------------------------------------------------------------------------------------------------------------------------------------------------------------------------------------------------------------------------------------------------------------------------------------------------------------------------------------------------------------------------------------------------------------------------------------------------------------------------------------------------------------------------------------------------------------------------------------------------------------------------------------------------------------------------------------------------------------------------------------------------------------------------------------------------------------------------------------------------------------------------------------------|
| 411 | <p>1s60A<br/>(152)</p> <p>2j8mB<br/>(170)</p> | C | <p>15.79</p> <p><b>TM-align:</b> aliSize=134 (resi) RMSD=2.47 (Å)<br/> lvprgshMDIROMNKTHLEHWRGLRKOLWP-----GHPD-DAHLADGEEI1QADHLASFIAMADGVAIGFADASIRH-D-YVngcdsSPVFLFEGIFLPSFRQGVAKOLIAAVQVORWGTNKCRESASDTSPEntiSOKVHOALGFEEETERVI-FYrkrc-----<br/> -----ASIRDAGVADLPGILAIYNDAVGnttaiwneTPVLIANROWFDAR-AROGYPILVASDAAGEVLYASYGDWRpFeGF-----RGTVEH-SVYVRDDQKGLGVOLLQALITERARAOCLHVMVAATIESGNAASIGLHRRLGFEISGOMPqVG- - - - qkfgrowldlftmqnlndptrsap</p> <p><b>SARST:</b> aliSize=132 (resi) RMSD=4.06 (Å)<br/> lvprgshMDIROMNKTHLEHWRGLRKOLWP-----QLW---PGHPDDAHLADGEEILOaDHLASFIAMA-DVAIGFADASIRhdYVNGC---DSSPVvflEGIFLPSFRQGVAKOLIAAVQVORWGTNKCRESASDTSPEntiSOKVHOALGFEEETERVI-FYR-----krc<br/> -----ASIRDAGVADLPGILAIYNDavgnTATwneTPVDLANROWFDARAR-QGYPILVASDAAGEVLYASYG---DWRPFegfrGTVEH---SVYVRDDQKGLGVOLLQALITERARAOCLHVMVAATIESGNAASIGLHRRLGFEISGOMPqvGQKfgrowldlftmqnlndptrsap---</p> <p><b>BLAST:</b> aliSize=25 (resi) iden=9.87% (15/152) simi=16.45% (25/152)<br/> lvprgshmdi rqnkthlehwgrl rklwpghpddahl adgee i lqadhl asfi amadgvaigfadas i rhdyvngcds spvfl eg-<br/> -----sirdagvadlpgilaiyndavgn t aiwne t pvdlanrqawf darar qgypilvasdaagev lgyasygdwrpfe gfrgtvehs IFVLPSPFRQGVAKOLIA<br/> VORWGTNKCRESASDTSPEntiSOKVHOALGFEE-----eterVifyrkrc<br/> LITERARAOCLHVMVAATIESGNAASIGLHRRLGFEISGOMPqvGQKfgrowldlftmqnlndptrsap-----</p> <p><b>Proposed:</b> aliSize=137 (resi) RMSD=2.11 (Å)<br/> lvprgshMDIROMNKTHLEHWRGLRKOLWP-----GHPD-DAHLADGEEI1QADHLASFIAMADGVAIGFADASIR---HDYvngcdsSPVFLFEGIFLPSFRQGVAKOLIAAVQVORWGTNKCRESASDTSPEntiSOKVHOALGFEEETERV-----VFYRKRC-----c<br/> -----ASIRDAGVADLPGILAIYNDAVGnttaiwneTPVLIANROWFDAR-AROGYPILVASDAAGEVLYASYGDWRpFeGF-----RGTVEH-SVYVRDDQKGLGVOLLQALITERARAOCLHVMVAATIESGNAASIGLHRRLGFEISGOMPqvGQKfgrowldlftmqnlndptrsap-</p> |
| 412 | <p>1s60A<br/>(152)</p> <p>2j8nA<br/>(169)</p> | C | <p>16.45</p> <p><b>TM-align:</b> aliSize=133 (resi) RMSD=2.40 (Å)<br/> lvprgshMDIROMNKTHLEHWRGLRKOLWP-----GHPD-DAHLADGEEI1QADHLASFIAMADGVAIGFADASIRH-D-YVngcdsSPVFLFEGIFLPSFRQGVAKOLIAAVQVORWGTNKCRESASDTSPEntiSOKVHOALGFEEETERVI-FYrkrc-----<br/> -----SIRDAGVADLPGILAIYNDAVGnttaiwneTPVLIANROWFDAR-AROGYPILVASDAAGEVLYASYGDWRpFeGF-----RGTVEH-SVYVRDDQKGLGVOLLQALITERARAOCLHVMVAATIESGNAASIGLHRRLGFEISGOMPqVG- - - - qkfgrowldlftmqnlndptrsap</p> <p><b>SARST:</b> aliSize=136 (resi) RMSD=4.01 (Å)<br/> lvprgshMDIROMNKTHLEHWRGLRKOLWP-----QLW---PGHPDDAHLADGEEILOaDHLASFIAMA-DVAIGFADASIRhdYVNGCDSPPVFLFEGIFLPSFRQGVAKOLIAAVQVORWGTNKCRESASDTSPEntiSOKVHOALGFEEETERVIFYRK-----rc<br/> -----SIRDAGVADLPGILAIYNDavgnTATwneTPVDLANROWFDARAR-QGYPILVASDAAGEVLYASYG---DWRPFEGFRGTVEHSVYVRDDQKGLGVOLLQALITERARAOCLHVMVAATIESGNAASIGLHRRLGFEISGOMPQVQKfgrowldlftmqnlndptrsap--</p> <p><b>BLAST:</b> aliSize=25 (resi) iden=9.87% (15/152) simi=16.45% (25/152)<br/> lvprgshmdi rqnkthlehwgrl rklwpghpddahl adgee i lqadhl asfi amadgvaigfadas i rhdyvngcds spvfl eg-<br/> -----sirdagvadlpgilaiyndavgn t aiwne t pvdlanrqawf darar qgypilvasdaagev lgyasygdwrpfe gfrgtvehs IFVLPSPFRQGVAKOLIA<br/> VORWGTNKCRESASDTSPEntiSOKVHOALGFEE-----eteVifyrkrc<br/> LITERARAOCLHVMVAATIESGNAASIGLHRRLGFEISGOMPqvGQKfgrowldlftmqnlndptrsap-----</p> <p><b>Proposed:</b> aliSize=136 (resi) RMSD=2.05 (Å)<br/> lvprgshMDIROMNKTHLEHWRGLRKOLWP-----GHPD-DAHLADGEEI1QADHLASFIAMADGVAIGFADASIR---HDYvngcdsSPVFLFEGIFLPSFRQGVAKOLIAAVQVORWGTNKCRESASDTSPEntiSOKVHOALGFEEETERV-----VFYRKRC-----c<br/> -----SIRDAGVADLPGILAIYNDAVGnttaiwneTPVLIANROWFDAR-AROGYPILVASDAAGEVLYASYGDWRpFeGF-----RGTVEH-SVYVRDDQKGLGVOLLQALITERARAOCLHVMVAATIESGNAASIGLHRRLGFEISGOMPqvGQKfgrowldlftmqnlndptrsap-</p>              |
| 413 | <p>1s60A<br/>(152)</p> <p>2jdcA<br/>(145)</p> | C | <p>15.17</p> <p><b>TM-align:</b> aliSize=130 (resi) RMSD=2.63 (Å)<br/> lvprgshMDIROMNKthLEhWRGLRKQ-LWGHDDAHLADGEEI1QADHLASFIAMADVAIGFADASIRHDYVNGCDSSPVVFLFEGIFVLPSPFRQGVAKOLIAAVQVORWGTNKCRESASDTSPEntiSOKVHOALGFEEETERVIFYrkrc-----<br/> -----IEVKPINA--ED-TYELRHRIRLNQPIEAC-MFE-SD-LLRGAFHLGGYGGKLSIASFHQA-EHSE-LOGQKQYQ-RGMATIEGYREQKAGSSLIKHAEELRKRADLLWCNART-S--ASGYKKLGFSEQGEVFDT---ppvgphilmykrit</p> <p><b>SARST:</b> aliSize=127 (resi) RMSD=4.72 (Å)<br/> lvprgshMDIROMNKTHLEHWRGLRKOLWP---GHPDDahladgee i lQADHLASFIAMADVAIGFADASIRHDYVNGCDSSPVVFLFEGIFVLPSPFRQGVAKOLIAAVQVORWGTNKCRESASDTSPEntiSOKVHOALGFEEETERVIFYRKRC-----c<br/> -----IEVKPINAEDTYELRHRILRNQPIEACMFES-----DLLRGAFHLGGYGGKLSIASFHQAHSSELQKQYQLRG--MATIEGYREQKAGSSLIKHAEELRKRADLLWCNARTSASGYK---KLGFSH--QGEVFDTPpvgphilmykrit-</p> <p><b>BLAST:</b> aliSize=46 (resi) iden=18.62% (27/145) simi=31.72% (46/145)<br/> lvprgshmdi rqnkthlehwrg-----RRKQ-LWGHDDAHLADGEEILOaDHLASFIAMADVAIGFADASIRHDYVNGCDSSPVVFLFEGIFVLPSPFRQGVAKOLIAAVQVORWGTNKCRESASDTSPEntiSOKVHOALGFEEETERV-----ifyrkrc<br/> -----ievkpinaedtyelrhrilrnqpieacmfesdlrgafhlGGYGG---KLSIASFHQAHSSELQKQYQ---RGMATIEGYREQKAGSSLIKHAEELRKRADLLWCNA---RTSASGYKKLGFSEQGEVfdtppvgphilmykrit-----</p> <p><b>Proposed:</b> aliSize=133 (resi) RMSD=2.19 (Å)<br/> lvprgshMDIROMNKthLEhWRGLRKQ-LWGHDDAHLADGEEI1QADHLASFIAMADVAIGFADASIRHDYVNGCDSSPVVFLFEGIFVLPSPFRQGVAKOLIAAVQVORWGTNKCRESASDTSPEntiSOKVHOALGFEEETERV-----VFYRKRC---c<br/> -----IEVKPINA--ED-TYELRHRIRLNQPIEAC-MF--SD-LLRGAFHLGGYGGKLSIASFHQAHS-E-LOGQKQYQ-RGMATIEGYREQKAGSSLIKHAEELRKRADLLWCNART-S--ASGYKKLGFSEQGEVfdtppvgPHILMYKRitc-</p>                                                                                                                                              |

|     |             |   |       |                                                                                                                                                                                                                                                                                                                                                                                                                                                                                                                                                                                                                                                                                                                                                                                                                                                                                                                                                                                                                                                                                                                                                                                                                                                                                                                                                                                                                                                                                                                                                                                                                                                                                                                                                                                                                                                                                                                                                                                                                                                                      |
|-----|-------------|---|-------|----------------------------------------------------------------------------------------------------------------------------------------------------------------------------------------------------------------------------------------------------------------------------------------------------------------------------------------------------------------------------------------------------------------------------------------------------------------------------------------------------------------------------------------------------------------------------------------------------------------------------------------------------------------------------------------------------------------------------------------------------------------------------------------------------------------------------------------------------------------------------------------------------------------------------------------------------------------------------------------------------------------------------------------------------------------------------------------------------------------------------------------------------------------------------------------------------------------------------------------------------------------------------------------------------------------------------------------------------------------------------------------------------------------------------------------------------------------------------------------------------------------------------------------------------------------------------------------------------------------------------------------------------------------------------------------------------------------------------------------------------------------------------------------------------------------------------------------------------------------------------------------------------------------------------------------------------------------------------------------------------------------------------------------------------------------------|
| 414 | 1s60A (152) | N | 10.53 | <p>TM-align: aliSize=130 (resi) RMSD=3.16 (Å)<br/> lvprgs-----HMDIROMNktHLEHWRLR--K---QL---WpG----HPDDAHLADGeEIlqAdHLASFIAMADGVAIGFADASIrhDyvngcdSSPVVfLEIIFVLPFRORGVAKOLIAAVORWGT-NKGCRESASDTSPE NTISOKVHOALGFETERVIFYKrc-----<br/> -----mwafperfeGRHVLEPLAALPAFLrhYdpeVYrflsRAVapteeALRAHLEGLL-GE--P-GRVNWAILFGKEVAIRISVIAPE-----EHAKLEIGTMLFKPWGSPANKEAKYL LRHAFEV LRAERVQFKVDLRNERSORALEALGAVREGVLRkNR-----lpdgafRDDVV</p> <p>ysvlkeewpgvkarlearlygasgnp</p> <p>SARST: aliSize=138 (resi) RMSD=4.84 (Å)<br/> lvpr-----SHMDIROMNktHLEHWRLR---GLRkOLWpGHPDdHLAGDGEIIOADHLASFIAMADGVAIGFADASIRhdYV--NGcdSSPVVfLEIIFVLPFRORGVAKOLIAAV--ORWGTNKGCREMASDTSPE NTISOKVHOALGFETERVIFYKrc-----<br/> -----mwafperfeGRHVLEPLAALPAFLrhYdPEVYRFLSRAVapteeALRHLHLEGLGEPGRVNWAILFGKEVAIRISVIA---PEpEHA--KLEL-----TMLFKPWGSPANKEAKYL LRHAFEV LRAERVQFKVDLRNERSORALEALGAVREGVLRK NRRLpdgafRDDVVysvlkeewpgvkarlearlygasgnp</p> <p>-----c<br/> gvkarlearlygasgnp-</p> <p>BLAST: aliSize=23 (resi) iden=8.55% (13/152) simi=15.13% (23/152)<br/> lvpr-----SHMDIROMNktHLEHWRLR---GLRkOLWpGHPDdHLAGDGEIIOADHLASFIAMADGVAIGFADASIRhdYV--NGcdSSPVVfLEIIFVLPFRORGVAKOLIAAV--ORWGTNKGCREMASDTSPE NTISOKVHOALGFETERVIFYKrc-----<br/> -----mwafperfeGRHVLEPLAALPAFLrhYdPEVYRFLSRAVapteeALRHLHLEGLGEPGRVNWAILFGKEVAIRISVIA---PEpEHA--KLEL-----TMLFKPWGSPANKEAKYL LRHAFEV LRAERVQFKVDLRNERSORALEALGAVREGVLRK NRRLpdgafRDDVVysvlkeewpgvkarlearlygasgnp</p> <p>-----amadgvaigfadasirhdYvngcdsspVvfLEIIFVLPFRORGVAKOLIAAVORWGTNKGCREMASDTSPE NTISOKVHOALGFETERVIFYKrc-----<br/> arlygasgnp</p> <p>Proposed: aliSize=128 (resi) RMSD=2.43 (Å)<br/> l---VPLGSHM-DIROMNktHLEHWRLR---GLRkOLWpGHPDdHLAGDGEIIOADHLASFIAMADGVAIGFADASIRhdYV--NGcdSSPVVfLEIIFVLPFRORGVAKOLIAAVORWGT-NKGCRESASDTSPE NTISOKVHOALGFETERVIFYKrc-----<br/> -----mwafperfeGRHVLEPLAALPAFLrhYdPEVYRFLSRAVapteeALRAHLEGLL-GEp---GRVNWAILFGKEVAIRISVIAPE-----HAKLEIGTMLFKPWGSPANKEAKYL LRHAFEV LRAERVQFKVDLRNERSORALEALGAVREGVLRK NRRLpdgafRDDVVysvlkeewpgvkarlearlygasgnp</p> <p>-----rkrcc<br/> vlkeewpgvkarlearlygasgnp-----</p> |
| 415 | 1s60A (152) | C | 7.89  | <p>TM-align: aliSize=124 (resi) RMSD=3.15 (Å)<br/> lvprg--SHMDIROMN--K-TLHLEHWRLRkOLW----GHpdd--AH1-ADGeEIlqadhLASFIAMADG-VATGFADASIRHDYvngcdsspVVFLEGITFIFLPSFRORGVAKOLIAAVORWGTNKGCRMASDTSPE NTISOKVHOALGFEE-ET-E-R--VIF-YRkrc-----<br/> -----mkGLLDFDILTndgThRNMkLLIDkNIFsrqlpkmPK-----yIvK-lVFD-RH----HESMVILKkQVIGGICFRQYKPO-----RFAEVAFLATANEQVRYGTRMnkFKDHMQKONI-YLLTYA--DNFAIGYFKKQGftkEhRmpQekWkgYIkdYdggtImecyihpyv</p> <p>----<br/> dygn</p> <p>SARST: aliSize=119 (resi) RMSD=5.04 (Å)<br/> lvprgshmd---IROMNktHLEHWRLR---KOLWpGHpddHLAGDGEIIOADHLASFIAMADGVAIGFADASIRHDYvngcdsspVVFLEGITFIFLPSFRORGVAKOLIAAVORWGTNKGCRMASDTSPE NTISOKVHOALGFEE-ET-E-R--VIF-YRkrc-----<br/> -----mkgllDFDILTNDGTHRNMkLLIDkNIFsrqlpkmPK-----KEYIVKLVFDRHESMVILKkQVIGGICFRQYKPO-----RFAEVAFLATANEQVRYGTRMnkFKDHMQKONI-YLLTYA--DNFAIGYFKKQGftkEhRmpQekWkgYIkdYdggtImecyihpyvdygn---</p> <p>rvifyrkrcc</p> <p>BLAST: aliSize=11 (resi) iden=3.95% (6/152) simi=7.24% (11/152)<br/> lvprgshmdirqmktHLEHWRLRkqlwpgHPDdHLAGDGEIIOADHLASFIAMADG-VATGFADASIRHDYvngcdsspVVFLEGITFIFLPSFRORGVAKOLIAAVORWGTNKGCRMASDTSPE NTISOKVHOALGFEE-ET-E-R--VIF-YRkrc-----<br/> -----mkgllDFDILTNDGTHRNMkLLIDkNIFsrqlpkmPK-----yIvK-lVFD-RH----HESMVILKkQVIGGICFRQYKPO-----RFAEVAFLATANEQVRYGTRMnkFKDHMQKONI-YLLTYA--DNFAIGYFKKQGftkEhRmpQekWkgYIkdYdggtImecyihpyvdygn---</p> <p>-----adasirhdYvngcdsspVvfLEIIFVLPFRORGVAKOLIAAVORWGTNKGCRMASDTSPE NTISOKVHOALGFETERVIFYKrc-----<br/> dydggtImecyihpyvdygn-----</p> <p>Proposed: aliSize=120 (resi) RMSD=2.37 (Å)<br/> lvprgshmd---HMDIROMN--K-TLHLEHWRLRkOLW----WpGHpddah---lAd-geEIlqadhLASFIAMADGVAIGFADASIRHDYvngcdsspVVFLEGITFIFLPSFRORGVAKOLIAAVORWGTNKGCRMASDTSPE NTISOKVHOALGFEE-ET-E-R--VIF-YRkrc-----<br/> -----mkgllDFDILTNDGTHRNMkLLIDkNIFsrqlpkmPK-----eyi---Vklv-Fd--RH----HESMVILKkQVIGGICFRQYKPO-----RFAEVAFLATANEQVRYGTRMnkFKDHMQKONI-YLLTYA--DNFAIGYFKKQGftkEhRmpQekWkgYIkdYdggtImecyihpyvdygn---</p> <p>RC-----c<br/> HPydygnc-</p>                                                                                          |
| 416 | 1s7fA (181) | C | 10.18 | <p>TM-align: aliSize=142 (resi) RMSD=3.37 (Å)<br/> glvprgshmvEiIPVstTLELRAdESHVPALHOVlkNKAWLQOSldwP TsqeETRHVVOGNILlHORGyakMYLIFCON-----EMAVLSFNAIEP--INNAAYIG-YWLDESFOGQIMSOS-IA-MTHYAR-GDIRRFVTKCRVDNOASNAVARRHFTLEG--MKQAEYIngdyhDvnm<br/> -----KfVIRPATA-ADCSDILRLIKELAKYEYME--EQVI--LHKDLEDGFG-EHPFYHCLVAEPVkehwtpeghSIVGFAMYFTYDpwGKLLYledFFVMSDYRFGIGSEIKNSQVAM-CRCSMHLVAEWEPSINFYKRRGASDLsseeqwr-LFK</p> <p>yarii-----<br/> -----idkeyllkmat</p> <p>SARST: aliSize=128 (resi) RMSD=4.67 (Å)<br/> glvprgshmvEiIPVstTLELRAdESHVPALHOVlkNKAWLQOSldwP TsqeetrkhvqGNIHORG---YAKMYLIFC-----ONE-MAVLS--SnaIEPINKAAYI--GYWLDESFOGQIMSOS-IA-MTHYAR-GDIRRFVTKCRVDNOASNAVARRHFTL-----<br/> -----kFVIRPATAADCSDILRLIKELAKYEYMEEQVILT-----EKDLEDGFGehpFYHCLVAEPVkehwtpeghSIVGFAMYFTYDpwGKLLYledFFVMSDYRFGIGSEIKNSQVAM-CR-CSSMHLVAEWEPSINFYKRRGASDLsseeqwrIfkidkey</p> <p>-----eCmkqaeyIngdyhDvnmYarii<br/> llkmat-----</p> <p>BLAST: aliSize=29 (resi) iden=9.58% (16/167) simi=17.37% (29/167)<br/> glvprgshmvEiIPVstTLELRAdeshvpalhqlvlnkawLqQslDwP TsqeetrkhvqgnilHQrgyakmylIFCNemagVLSfnaI-----E-INKAAYI-GYWLDESFOGQIMSOS-IA-MTHYAR-GDIRRFVTKCRVDNOASNAVARRHFTLEG--MKQAEYIngdyhDvnm<br/> -----KfVIRPATAADCSDILRLIKELAKYEYMEEQVILT-----EKDLEDGFGehpFYHCLVAEPVkehwtpeghSIVGFAMYFTYDpwGKLLYledFFVMSDYRFGIGSEIKNSQVAM-CRCSMHLVAEWEPSINFYKRRGASDLsseeqwrIfkidkey</p> <p>ORQIMSOS-IA-MTHYAR-GDIRRFVTKCRVDNOASNAVARRHFTLEG--MKQAEYIngdyhDvnmYarii<br/> RFFGIGSEIKNSQVAM-CRCSMHLVAEWEPSINFYKRRGASDLsseeqwrIfkidkeyllkmat-----</p> <p>Proposed: aliSize=140 (resi) RMSD=2.84 (Å)<br/> glvprgshmvEiIPVstTLELRAdESHVPALHOVlkNKAWLQOSldwP TsqeETRHVVOGNILlHORGyakMYLIFCON-----EMAVLSFNAIE---piNNAAYIG-YWLDESFOGQIMSOS-IA-MTHYAR-GDIRRFVTKCRVDNOASNAVARRHFTLEG--MKQAEYIngdyhDvnm<br/> -----KfVIRPATAADCSDILRLIKELAKYEYMEEQVILT-----VI--LHKDLEDGFGehpFYHCLVAEPVkehwtpeghSIVGFAMYFTYDpwGKLLYledFFVMSDYRFGIGSEIKNSQVAM-CRCSMHLVAEWEPSINFYKRRGASDLsseeqwr-----W-----</p> <p>edYHDVNM---YAR--Ii<br/> --RLFKIDkeyLLkmat-</p>                                                             |

|     |                                               |   |       |                                                                                                                                                                                                                                                                                                                                                                                                                                                                                                                                                                                                                                                                                                                                                                                                                                                                                                                                                                                                                                                                                                                                                                                                                                                                                                                                                                                                                                                                                                                                                                                                                                                                                                                                                                                                                                                                                                                                                                                                                                                                                                                                                            |
|-----|-----------------------------------------------|---|-------|------------------------------------------------------------------------------------------------------------------------------------------------------------------------------------------------------------------------------------------------------------------------------------------------------------------------------------------------------------------------------------------------------------------------------------------------------------------------------------------------------------------------------------------------------------------------------------------------------------------------------------------------------------------------------------------------------------------------------------------------------------------------------------------------------------------------------------------------------------------------------------------------------------------------------------------------------------------------------------------------------------------------------------------------------------------------------------------------------------------------------------------------------------------------------------------------------------------------------------------------------------------------------------------------------------------------------------------------------------------------------------------------------------------------------------------------------------------------------------------------------------------------------------------------------------------------------------------------------------------------------------------------------------------------------------------------------------------------------------------------------------------------------------------------------------------------------------------------------------------------------------------------------------------------------------------------------------------------------------------------------------------------------------------------------------------------------------------------------------------------------------------------------------|
| 417 | <p>1s7fA<br/>(181)</p> <p>2fe7B<br/>(166)</p> | N | 10.24 | <p>TM-align: aliSize=143 (resi) RMSD=3.28 (Å)<br/> glvprgshmvveipvs-----TLELRAdESHVPALHOLVlknkAWLOOSLdWPTsqEETRKHVOGNIllhORGYAKMYLIFCONEMA VLSNAIEP---INKAAIG-YWLDESFOGQIMSOSOA MTHYARRGdIRRFVlKCRVDNOASNAVARRNHFTLEGCmKQAEYlNgdyhdvnm<br/> -----enlyfqghMLEIRPVPADAEQILAFIIELDYERAR-hEVV--TDVEGIRRSLEA--EGSPTRALMCLSEGRPIYAVFYYSYStwLGRNGI LEdLYVTPEYRQVAGRRLREAREAVAND-CGLEWSVLDWQPAIDFY SIGALPQDEWVRYRL-----</p> <p>arii-----<br/> ----dgealrkmae</p> <p>SARST: aliSize=146 (resi) RMSD=7.40 (Å)<br/> glvprgs---HMVEIIPvsstLELRAdESHVPALHOLVlknkAWLOOSLDWPTsqeetrkhvOGNILLHOR--YAKMYLIFCONEMA VLSNAIEPINKAAYI---GYWLDDESFOGQIMSOSOA MTHYARRGdIRRFVlKCRVDNOASNAVARRNHFTL--GCmKqaEYLN-----gd<br/> -----enlyfQGHMTLEIRPVPADAEQILAFIIELDYERARHEVVD-----VEGIRRSLEA--EGSPTRALMCLSEGRPIYAVFYYSYStwLGRNGI LEdLYVTPEYRQVAGRRLREAREAVAND-CGLEWSVLDWQPAIDFY SIGALPQdWVRY--RLDGealrkmae--</p> <p>yhdvnmarii</p> <p>BLAST: aliSize=47 (resi) iden=18.67% (31/166) simi=28.31% (47/166)<br/> glvprgshmvveipvs-----TLELRAdeshVPALHOLVlknkAWLOOSLDWPTsqEETRKHVOGNIllhORGYAKMYLIFCONEMA VLSNAIEP---INKAAIG-YWLDESFOGQIMSOSOA MTHYARRGdIRRFVlKCRVDNOASNAVARRNHFTLEGCmKQAEYlNgdyhdvnm<br/> -----enlyfqghMLEIRPVPADAEQILAFIIELDYERARHEVVD-----VEGIRRSLEA--EGSPTRALMCLSEGRPIYAVFYYSYStwLGRNGI LEdLYVTPEYRQVAGRRLREAREAVAND-CGLEWSVLDWQPAIDFY SIGALPQdWVRY--RLDGealrkmae--</p> <p>-----gdrrfvikcrvdnqasnavarrnhftlegcmkqaeylNgdyhdvnmarii<br/> ryrldgealrkmae-----</p> <p>Proposed: aliSize=143 (resi) RMSD=2.61 (Å)<br/> glvprg-SHMVEIIPvsstLELRAdESHVPALHOLVlknkAWLOOSLDWPTsqeETRKHVOGNIllhOR-gYAKMYLIFCONEMA VLSNAIEP---pINKAAIG-YWLDESFOGQIMSOSOA MTHYARRGdIRRFVlKCRVDNOASNAVARRNHFTLEGCmKqaEYlNgdyhdvnm<br/> -----enlyfQGHMTLEIRPVPADAEQILAFIIELDYERARhe----VVT--DVEGIRRSLEA--EGS-PTRALMCLSEGRPIYAVFYYSYStwLGRNGI LEdLYVTPEYRQVAGRRLREAREAV-ANDCGLEWSVLDWQPAIDFY SIGALPQDEWV-RYrldgealrkmae--</p> <p>ngdyhdvnmarii</p>                                                                                                                                                                                                                                                   |
| 418 | <p>1s7fA<br/>(181)</p> <p>2fe7B<br/>(166)</p> | C | 10.84 | <p>TM-align: aliSize=143 (resi) RMSD=3.28 (Å)<br/> glvprgshmvveipvs-----TLELRAdESHVPALHOLVlknkAWLOOSLdWPTsqEETRKHVOGNIllhORGYAKMYLIFCONEMA VLSNAIEP---INKAAIG-YWLDESFOGQIMSOSOA MTHYARRGdIRRFVlKCRVDNOASNAVARRNHFTLEGCmKQAEYlNgdyhdvnm<br/> -----enlyfqghMLEIRPVPADAEQILAFIIELDYERAR-hEVV--TDVEGIRRSLEA--EGSPTRALMCLSEGRPIYAVFYYSYStwLGRNGI LEdLYVTPEYRQVAGRRLREAREAVAND-CGLEWSVLDWQPAIDFY SIGALPQDEWVRYRL-----</p> <p>arii-----<br/> ----dgealrkmae</p> <p>SARST: aliSize=146 (resi) RMSD=7.40 (Å)<br/> glvprgs---HMVEIIPvsstLELRAdESHVPALHOLVlknkAWLOOSLDWPTsqeetrkhvOGNILLHOR--YAKMYLIFCONEMA VLSNAIEPINKAAYI---GYWLDDESFOGQIMSOSOA MTHYARRGdIRRFVlKCRVDNOASNAVARRNHFTL--GCmKqaEYLN-----gd<br/> -----enlyfQGHMTLEIRPVPADAEQILAFIIELDYERARHEVVD-----VEGIRRSLEA--EGSPTRALMCLSEGRPIYAVFYYSYStwLGRNGI LEdLYVTPEYRQVAGRRLREAREAVAND-CGLEWSVLDWQPAIDFY SIGALPQdWVRY--RLDGealrkmae--</p> <p>yhdvnmarii</p> <p>BLAST: aliSize=47 (resi) iden=18.67% (31/166) simi=28.31% (47/166)<br/> glvprgshmvveipvs-----TLELRAdeshVPALHOLVlknkAWLOOSLDWPTsqEETRKHVOGNIllhORGYAKMYLIFCONEMA VLSNAIEP---INKAAIG-YWLDESFOGQIMSOSOA MTHYARRGdIRRFVlKCRVDNOASNAVARRNHFTLEGCmKQAEYlNgdyhdvnm<br/> -----enlyfqghMLEIRPVPADAEQILAFIIELDYERARHEVVD-----VEGIRRSLEA--EGSPTRALMCLSEGRPIYAVFYYSYStwLGRNGI LEdLYVTPEYRQVAGRRLREAREAVAND-CGLEWSVLDWQPAIDFY SIGALPQdWVRY--RLDGealrkmae--</p> <p>-----gdrrfvikcrvdnqasnavarrnhftlegcmkqaeylNgdyhdvnmarii<br/> ryrldgealrkmae-----</p> <p>Proposed: aliSize=139 (resi) RMSD=2.52 (Å)<br/> glvprgshmvveipvs-----TLELRAdESHVPALHOLVlknkAWLOOSLDWPTsqeETRKHVOGNIllhOR-gYAKMYLIFCONEMA VLSNAIEP---pINKAAIG-YWLDESFOGQIMSOSOA MTHYARRGdIRRFVlKCRVDNOASNAVARRNHFTLEGCmKqaEYlNgdyhdvnm<br/> -----enlyfqghMLEIRPVPADAEQILAFIIELDYERARhe----VVT--DVEGIRRSLEA--EGS-PTRALMCLSEGRPIYAVFYYSYStwLGRNGI LEdLYVTPEYRQVAGRRLREAREAV-ANDCGLEWSVLDWQPAIDFY SIGALPQD-----</p> <p>hDVMNARI---I-----<br/> EWVRRLDgealrkmae</p>                                                                                                                                                                                                                                      |
| 419 | <p>1s7fA<br/>(181)</p> <p>2g3tA<br/>(169)</p> | C | 11.24 | <p>TM-align: aliSize=142 (resi) RMSD=3.39 (Å)<br/> glvprgshmvveipvsTLELRAdESHVPALHOLVlknkAWLOOSLDWPTsqEETRKHVOGNIllhORGYAKMYLIFCONEMA VLSNAIEP---INKAAIG-YWLDESFOGQIMSOSOA MTHYARRGdIRRFVlKCRVDNOASNAVARRNHFTLEGCmKQAEYlNgdyhdvnm<br/> -----KFVIRPATA-ADCSIDLRLIKELAKYEYME--EQVI--LEKDLLEDGFG-EPHYHCLVAEVPKehwtpghSIVGFAMYFYTYDpwGGLLYLEdFFVMSDYRFGGSEIKNSQVAM--RCRCSSMHFLVAEWNEPSINFYKRRGASDLSseegwR-LFK-----</p> <p>yarii-----<br/> ----idkeyllkmatee</p> <p>SARST: aliSize=136 (resi) RMSD=6.14 (Å)<br/> glvprgshmvveipvsTLELRAdESHVPALHOLVlknkAWLOOSLDWPTsqeetrkhvOGNILLHOR--YAKMYLIFCONEMA VLSNAIEPINKAAYI---GYWLDDESFOGQIMSOSOA MTHYARRGdIRRFVlKCRVDNOASNAVARRNHFTLEGCmKqaEYlNgdyhdvnm<br/> -----kFVIRPATA-ADCSIDLRLIKELAKYEYMEEQVILT-----EKDLEDGFGehpFYHCLVAEVPkehwtPEHGSIVGFAMYFYTYDpwGGLLYLEdFFVMSDYRFGGSEIKNSQVAM--RCRCSSMHFLVAEWNEPSINFYKRRGASDLSseegwR-----</p> <p>edYhdvnmYARI-----i<br/> -----FKIDkeyllkmatee-</p> <p>BLAST: aliSize=29 (resi) iden=9.47% (16/169) simi=17.16% (29/169)<br/> glvprgshmvveipvsTLELRAdeshvpalhqlvknkawlqslwdwptsqeetrkhvqgnillhrgyakmylifconemagvlsfnai-----E--INKAAIG-YWLDESFOGQIMSOSOA MTHYARRGdIRRFVlKCRVDNOASNAVARRNHFTLEGCmKQAEYlNgdyhdvnm<br/> -----kfvirpataadcsdilrlikelakyeymeeqviltekdllledgfghepFYHCLVAEVPkehwtpeghsivgfamyfTyDpwGGLLYLEdFFVMSDYRFGGSEIKNSQVAM--RCRCSSMHFLVAEWNEPSINFYKRRGASDLSseegwR-----</p> <p>-----nhftlegcmkqaeylNgdyhdvnmarii<br/> -----E--INKAAIG-YWLDESFOGQIMSOSOA MTHYARRGdIRRFVlKCRVDNOASNAVARRNHFTLEGCmKQAEYlNgdyhdvnm<br/> -----kfvirpataadcsdilrlikelakyeymeeqviltekdllledgfghepFYHCLVAEVPkehwtpeghsivgfamyfTyDpwGGLLYLEdFFVMSDYRFGGSEIKNSQVAM--RCRCSSMHFLVAEWNEPSINFYKRRGASDLSseegwR-----</p> <p>Proposed: aliSize=140 (resi) RMSD=2.70 (Å)<br/> glvprgshmvveipvsTLELRAdESHVPALHOLVlknkAWLOOSLDWPTsqeETRKHVOGNIllhORGYAKMYLIFCONEMA VLSNAIEP---pINKAAIG-YWLDESFOGQIMSOSOA MTHYARRGdIRRFVlKCRVDNOASNAVARRNHFTLEGCmKqaEYlNgdyhdvnm<br/> -----kfvirpATA-ADCSIDLRLIKELAKYEYMEeq-----VI--LEKDLLEDGFGehpFYHCLVAEVPkehwtpeghSIVGFAMYFYTYDpwGGLLYLEdFFVMSDYRFGGSEIKNSQVAM--RCRCSSMHFLVAEWNEPSINFYKRRGASDLSseegwR-----</p> <p>GDYHDVNM---A-R--II-<br/> EGWRLFKIdkeLLkmaTee</p> |

|     |                                                     |   |       |                                                                                                                                                                                                                                                                                                                                                                                                                                                                                                                                                                                                                                                                                                                                                                                                                                                                                                                                                                                                                                                                                                                                                                                                                                                                                                                                                                                                                                                                                                                                                                                                                                                                                                                                                                                                                                                                                                     |
|-----|-----------------------------------------------------|---|-------|-----------------------------------------------------------------------------------------------------------------------------------------------------------------------------------------------------------------------------------------------------------------------------------------------------------------------------------------------------------------------------------------------------------------------------------------------------------------------------------------------------------------------------------------------------------------------------------------------------------------------------------------------------------------------------------------------------------------------------------------------------------------------------------------------------------------------------------------------------------------------------------------------------------------------------------------------------------------------------------------------------------------------------------------------------------------------------------------------------------------------------------------------------------------------------------------------------------------------------------------------------------------------------------------------------------------------------------------------------------------------------------------------------------------------------------------------------------------------------------------------------------------------------------------------------------------------------------------------------------------------------------------------------------------------------------------------------------------------------------------------------------------------------------------------------------------------------------------------------------------------------------------------------|
| 420 | <p>1s7fA<br/>(181)</p> <hr/> <p>2jevA<br/>(169)</p> | C | 11.24 | <p><b>TM-align:</b> aliSize=143 (resi) RMSD=3.55 (Å)<br/> glvprgshmeiipvsttLELRAdESHVPALHOVLKNAWLOOSLDWPTSQEERKHVQGNILLhORGYAKMYLIFCON-----EMAVLSFNALIEP--INAAAYIG-YWLDESFOGOGTMSOSAOAMTHYARFGDIRRFVTKCRVDNOASNAVARRNHFTLEGC--MKaAEYIngdyhdvnm<br/> -----AKFVIRPATA-ADCSIDLRLIKELAKYEYME--EQVI--LTKDLEDGFG-EHPFYHCLVAEVPKehwtpgehSIVGFAMYFYFTYDpwGALLYLeDFFVMSDYRFGIGSEIKNSQVAM-CRCSMHLVAEWNEPSINFYKRRGASDLsSeegwrLfk-----</p> <p>yarii-----<br/> -----idkeyllkmate</p> <p><b>SARST:</b> aliSize=129 (resi) RMSD=4.68 (Å)<br/> glvprgshmeiipvsttLELRAdESHVPALHOVLKNAWLOOSLDWPTSQEERKHVQGNILLhORG---YAKMYLIFC-----ONE-MAIVL--SInAIEFINKAAYI--GYWLDESFOGOGTMSOSAOAMTHYARFGDIRRFVTKCRVDNOASNAVARRNHFTLE-----<br/> -----akFVIRPATA-ADCSIDLRLIKE-LAKYEYMEEQVILT-----KDLLEDGFGehpFYHCLVAEVPkehwtpeghSIVGFAMYFYFTYDpwGALLYLeDFFVMSDYRFGIGSEIKNSQVAM-CR-CSSMHLVAEWNEPSINFYKRRGASDLsSeegwrLfkidke</p> <p>-----gcmkqaeyIngdyhdvnmarii<br/> yilkmate-----</p> <p><b>BLAST:</b> aliSize=29 (resi) iden=9.47% (16/169) simi=17.16% (29/169)<br/> glvprgshmeiipvsttLELRAdESHVPALHQLVlknkawlqslDwptSQEERKHVQGNILLhrgyakmylifcnemagvlsfnai-----EINAAAYI-GYWLDES<br/> -----akfvirpataadcsdilrlikelakyeymeeqviltekdllEdgfghepFYHCLVAEVPkehwtpeghsivgfamyftyDwGALLYLeDFFVMSD<br/> FOGOGTMSOSAOAMTHYARFGDIRRFVTKCRVDNOASNAVARRNHFTLE-----nhftleGcmkqaeyIngdyhdvnmarii<br/> YRFGIGSEIKNSQVAM-CRCSMHLVAEWNEPSINFYKRRGASDLsSeegwrLfkidkeyllkmate-----</p> <p><b>Proposed:</b> aliSize=142 (resi) RMSD=2.88 (Å)<br/> glvprgshmeiipvsttLELRAdESHVPALHOVLKNAWLOOSLDWPTSQEERKHVQGNILLhORGYAKMYLIFCON-----EMAVLSFNALIEP--INAAAYIG-YWLDESFOGOGTMSOSAOAMTHYARFGDIRRFVTKCRVDNOASNAVARRNHFTLEGC--cmkaevlN<br/> -----akFVIRPATA-ADCSIDLRLIKELAKYEYMEeq-----VI--LTKDLEDGFGehpFYHCLVAEVPkehwtpeghSIVGFAMYFYFTYDpwGALLYLeDFFVMSDYRFGIGSEIKNSQVAM-CRCSMHLVAEWNEPSINFYKRRGASDLsSe-----E<br/> GDYHDVNM--A-R--II<br/> GWRLFKTDkeLlkmaTE</p> |
| 421 | <p>1sjvA<br/>(102)</p> <hr/> <p>1dqH<br/>(123)</p>  | C | 62.75 | <p><b>TM-align:</b> aliSize=90 (resi) RMSD=1.88 (Å)<br/> -----G-GGLVQAGEESLKLSCAA---S--GGFMGYROAPGKQRELVAITNSRfITNADFKGRFTISRDNAKKIVYLEMNSLEPEDTAVYYCYTHYFRSyywgggtqvtvss-----<br/> vqlvesgGGLVQPGSLRLSCAASgftfsSYAHVVRQAPGKGLFWAVISSDgNKYITDSVKGRFTISRDNKNTLYLQMSLRTEDTAVFYCARgnppYSSGwGGDYWGQGMVTVSS</p> <p><b>SARST:</b> aliSize=98 (resi) RMSD=14.71 (Å)<br/> gg-----GLVQAGEESLKLSCAASG---GFMGYROAPGKQRELVAITNSRfITNADFKGRFTISRDNAKKIVYLEMNSLEPEDTAVYYCYTHYFRSY-----WGQGTQVTV--ss<br/> --vqlvesggGGLVQPGSLRLSCAASgftfsSYAHVVRQAPGKGLFWAVISSDgNKYITDSVKGRFTISRDNKNTLYLQMSLRTEDTAVFYCARgnppYSSGwGGDYWGQGMVTVSS--</p> <p><b>BLAST:</b> aliSize=79 (resi) iden=67.65% (69/102) simi=77.45% (79/102)<br/> -----GGLVQAGEESLKLSCAASG---GFMGYROAPGKQRELVAITNSRfITNADFKGRFTISRDNAKKIVYLEMNSLEPEDTAVYYCYTHYFRSyywgggtqvtvss-----YTHYFRSyywgggtqvtvss<br/> vqlvesGGLVQPGSLRLSCAASgftfsSYAHVVRQAPGKGLFWAVISSDgNKYITDSVKGRFTISRDNKNTLYLQMSLRTEDTAVFYCARgnppYSSGwGGDYWGQGMVTVSS</p> <p><b>Proposed:</b> aliSize=102 (resi) RMSD=1.65 (Å)<br/> -----G-GGLVQAGEESLKLSCAA---S--GGFMGYROAPGKQRELVAITNSRfITNADFKGRFTISRDNAKKIVYLEMNSLEPEDTAVYYCYTHYFRSyywgggtqvtvss-----YTHYFRSyywgggtqvtvss<br/> pvqlvesgGGLVQPGSLRLSCAASgftfsSYAHVVRQAPGKGLFWAVISSDgNKYITDSVKGRFTISRDNKNTLYLQMSLRTEDTAVFYCARgnppYSSGwGGDYWGQGMVTVSS</p>                                                                                                                                                                                                                                                                                                                                                                                                                                                                                                                                                                                          |
| 422 | <p>1sjvA<br/>(102)</p> <hr/> <p>1f2xK<br/>(126)</p> | C | 69.61 | <p><b>TM-align:</b> aliSize=88 (resi) RMSD=1.65 (Å)<br/> -----G-GGLVQAGEESLKLSCAA---S--GGFMGYROAPGKQRELVAITNSRfITNADFKGRFTISRDNAKKIVYLEMNSLEPEDTAVYYCYTHYFRSyywgggtqvtvss-----<br/> qvlvesgGGLVQPGSLRLSCAASgftfsSYAHVVRQAPGKGLFWAVISSDgNKYITDSVKGRFTISRDNKNTLYLQMSLRTEDTAVFYCARgnppYSSGwGGDYWGQGMVTVSS</p> <p><b>SARST:</b> aliSize=99 (resi) RMSD=16.12 (Å)<br/> g-----GGLVQAGEESLKLSCAASG---GFMGYROAPGKQRELVAITNSRfITNADFKGRFTISRDNAKKIVYLEMNSLEPEDTAVYYCYTHYFRSyywgggtqvtvss-----YTHYFRSyywgggtqvtvss<br/> -qvlvesggGGLVQPGSLRLSCAASgftfsSYAHVVRQAPGKGLFWAVISSDgNKYITDSVKGRFTISRDNKNTLYLQMSLRTEDTAVFYCARgnppYSSGwGGDYWGQGMVTVSS--</p> <p><b>BLAST:</b> aliSize=82 (resi) iden=73.53% (75/102) simi=80.39% (82/102)<br/> -----GGLVQAGEESLKLSCAASG---GFMGYROAPGKQRELVAITNSRfITNADFKGRFTISRDNAKKIVYLEMNSLEPEDTAVYYCYTHYFRSyywgggtqvtvss-----YTHYFRSyywgggtqvtvss<br/> qvlvesGGLVQPGSLRLSCAASgftfsSYAHVVRQAPGKGLFWAVISSDgNKYITDSVKGRFTISRDNKNTLYLQMSLRTEDTAVFYCARgnppYSSGwGGDYWGQGMVTVSS</p> <p><b>Proposed:</b> aliSize=100 (resi) RMSD=1.34 (Å)<br/> g-----GGLVQAGEESLKLSCAA---S--GGFMGYROAPGKQRELVAITNSRfITNADFKGRFTISRDNAKKIVYLEMNSLEPEDTAVYYCYTHYFRSyywgggtqvtvss-----YTHYFRSyywgggtqvtvss<br/> -qvlvesggGGLVQPGSLRLSCAASgftfsSYAHVVRQAPGKGLFWAVISSDgNKYITDSVKGRFTISRDNKNTLYLQMSLRTEDTAVFYCARgnppYSSGwGGDYWGQGMVTVSS</p>                                                                                                                                                                                                                                                                                                                                                                                                                                                                                                                                                                        |

|     |                                             |   |       |                                                                                                                                                                                                                                                                                                                                                                                                                                                                                                                                                                                                                                                                                                                                                                                                                                                                                                                                                                                                                                                                                                                                                                                                                                                                                                                                                                           |
|-----|---------------------------------------------|---|-------|---------------------------------------------------------------------------------------------------------------------------------------------------------------------------------------------------------------------------------------------------------------------------------------------------------------------------------------------------------------------------------------------------------------------------------------------------------------------------------------------------------------------------------------------------------------------------------------------------------------------------------------------------------------------------------------------------------------------------------------------------------------------------------------------------------------------------------------------------------------------------------------------------------------------------------------------------------------------------------------------------------------------------------------------------------------------------------------------------------------------------------------------------------------------------------------------------------------------------------------------------------------------------------------------------------------------------------------------------------------------------|
| 423 | <p>lsjvA (102)</p> <hr/> <p>lf2xL (126)</p> | C | 69.61 | <p><b>TM-align:</b> aliSize=88 (resi) RMSD=1.55 (Å)<br/> -----G-GGLVQAGEESLKLSCAA---S--GGFMGWYRQAPGKQRELVATINSR--ITINADFKVGRFTISRDNAKKTVYLEMNSLEPEDTAVYYCYTHYFRS--ywgqgtqvtvss-----<br/> vqlvesgGGSVQAGGSLRLSCAASgyTvsTYCMGWFROAPGKEREVATILG--ISTYYGDSVKGRFTISQDNAKNTVYLQMNLSKPEDTAIYYCAGSTVA-----stgwcsrlrpydyhrgggtqvtvssr</p> <p><b>SARST:</b> aliSize=99 (resi) RMSD=16.15 (Å)<br/> g-----GGLVQAGEESLKLSCAASG---GFMGWYRQAPGKQRELVATINSR--ITINADFKVGRFTISRDNAKKTVYLEMNSLEPEDTAVYYCYTHYFRS-----WGGTQVTVS--s<br/> -vqlvesgGGSVQAGGSLRLSCAASgyTvsTYCMGWFROAPGKEREVATILG--ISTYYGDSVKGRFTISQDNAKNTVYLQMNLSKPEDTAIYYCAGSTVASTgwcsrlrpydyhRGGTQVTVSsr</p> <p><b>BLAST:</b> aliSize=82 (resi) iden=73.53% (75/102) simi=80.39% (82/102)<br/> -----GGGLVQAGEESLKLSCAASG---GFMGWYRQAPGKQRELVATINSR--ITINADFKVGRFTISRDNAKKTVYLEMNSLEPEDTAVYYCYTHYFRS-----YTHYFRS--WGGTQVTVSS--<br/> vqlvesGGSVQAGGSLRLSCAASgyTvsTYCMGWFROAPGKEREVATILG--ISTYYGDSVKGRFTISQDNAKNTVYLQMNLSKPEDTAIYYCAGstvasrgwcsrlrpydyhRGGTQVTVSSr</p> <p><b>Proposed:</b> aliSize=101 (resi) RMSD=1.43 (Å)<br/> -----G-GGLVQAGEESLKLSCAA---S--GGFMGWYRQAPGKQRELVATINSR--ITINADFKVGRFTISRDNAKKTVYLEMNSLEPEDTAVYYCYTHYF-----RS--WGGTQVTVSS--<br/> vqlvesgGGSVQAGGSLRLSCAASgyTvsTYCMGWFROAPGKEREVATILG--ISTYYGDSVKGRFTISQDNAKNTVYLQMNLSKPEDTAIYYCAGSTVASTgwcsrlrpydyhRGGTQVTVSSr</p>                                  |
| 424 | <p>lsjvA (102)</p> <hr/> <p>li3vA (129)</p> | C | 67.65 | <p><b>TM-align:</b> aliSize=88 (resi) RMSD=1.48 (Å)<br/> -----G-GGLVQAGEESLKLSCAA---S--GGFMGWYRQAPGKQRELVATINSR-----GITINADFKVGRFTISRDNAKKTVYLEMNSLEPEDTAVYYCYTHYFRS--ywgqgtqvtvss-----<br/> qvqlqeSgGGLVQAGDSLKLSCAASgdsiGTYVIIGWFRQAPGKERIYLATIGRNlvgpsdfYTRYADSVKGRFAVSRDNAKNTVNLQMNLSKPEDTAVYYCAAKTT-----twggndpnnwnywgqgtqvtvss</p> <p><b>SARST:</b> aliSize=98 (resi) RMSD=14.83 (Å)<br/> gg-----GLVQAGEESLKLSCA---ASGGFMGWYRQAPGKQRELVATINSR---RGIT--NYADFKVGRFTISRDNAKKTVYLEMNSLEPEDTAVYYCYTHYFRS-----YWGQGTQVTVS--ss<br/> --qvqlqesggGLVQAGDSLKLSCAASgdsiGTYVIIGWFRQAPGKERIYLATIGRNlvgpsdfYTRYADSVKGRFAVSRDNAKNTVNLQMNLSKPEDTAVYYCAAKTTTWggndpnnwnYWGQGTQVTVS--ss</p> <p><b>BLAST:</b> aliSize=84 (resi) iden=73.53% (75/102) simi=82.35% (84/102)<br/> -----GGGLVQAGEESLKLSCAASG---GFMGWYRQAPGKQRELVATINSR-----GITINADFKVGRFTISRDNAKKTVYLEMNSLEPEDTAVYYCYTHYFR-----SYWGQGTQVTVSS<br/> qvqlqesGGGLVQAGDSLKLSCAASgdsiGTYVIIGWFRQAPGKERIYLATIGRNlvgpsdfYTRYADSVKGRFAVSRDNAKNTVNLQMNLSKPEDTAVYYCAAKTTTWggndpnnwnYWGQGTQVTVSS</p> <p><b>Proposed:</b> aliSize=101 (resi) RMSD=1.50 (Å)<br/> -----G-GGLVQAGEESLKLSCAA---S--GGFMGWYRQAPGKQRELVATINSR-----GITINADFKVGRFTISRDNAKKTVYLEMNSLEPEDTAVYYCYTHYF-----RSYWGQGTQVTVSS<br/> qvqlqeSgGGLVQAGDSLKLSCAASgdsiGTYVIIGWFRQAPGKERIYLATIGRNlvgpsdfYTRYADSVKGRFAVSRDNAKNTVNLQMNLSKPEDTAVYYCAAK-TtwggndpnnwnYWGQGTQVTVSS</p> |
| 425 | <p>lsjvA (102)</p> <hr/> <p>li8kB (119)</p> | C | 57.84 | <p><b>TM-align:</b> aliSize=89 (resi) RMSD=1.59 (Å)<br/> -----G-GGLVQAGEESLKLSCAA---S--GGFMGWYRQAPGKQRELVATINSR--ITINADFKVGRFTISRDNAKKTVYLEMNSLEPEDTAVYYCYTHYFRS--ywgqgtqvtvss-----<br/> qvklqqsGGLVKPAAASLKLSCVTSgftfrKFGMSVVRQTSDCLEWVASISTGyNYYSDNVKGRFTISRDNAKNTLYLQMNLSKSEDTALYYCTRYSSTSyamdywgqgttvtvs</p> <p><b>SARST:</b> aliSize=99 (resi) RMSD=14.75 (Å)<br/> g-----GGLVQAGEESLKLSCA---AASG---GFMGWYRQAPGKQRELVATINSR--ITINADFKVGRFTISRDNAKKTVYLEMNSLEPEDTAVYYCYTHYFRS-----WGGTQVTVS--ss<br/> -qvklqqsGGLVKPAAASLKLSCVTSgftfrKFGMSVVRQTSDCLEWVASISTGyNYYSDNVKGRFTISRDNAKNTLYLQMNLSKSEDTALYYCTRYSSTSyamdyWGGTQVTVS--</p> <p><b>BLAST:</b> aliSize=77 (resi) iden=64.71% (66/102) simi=75.49% (77/102)<br/> -----GGGLVQAGEESLKLSCAASG---GFMGWYRQAPGKQRELVATINSR--ITINADFKVGRFTISRDNAKKTVYLEMNSLEPEDTAVYYCYTHYFRS-----YTHYFRS--WGGTQVTVSS<br/> qvklqqsGGGLVKPAAASLKLSCVTSgftfrKFGMSVVRQTSDCLEWVASISTGyNYYSDNVKGRFTISRDNAKNTLYLQMNLSKSEDTALYYCTRgYsSTSYAMDYWGQGTQVTVS-</p> <p><b>Proposed:</b> aliSize=100 (resi) RMSD=1.63 (Å)<br/> -----G-GGLVQAGEESLKLSCAA---S--GGFMGWYRQAPGKQRELVATINSR--ITINADFKVGRFTISRDNAKKTVYLEMNSLEPEDTAVYYCYTHYF--F-RS--YWGQGTQVTVSS<br/> qvklqqsGGLVKPAAASLKLSCVTSgftfrKFGMSVVRQTSDCLEWVASISTGyNYYSDNVKGRFTISRDNAKNTLYLQMNLSKSEDTALYYCTRgy-SstSyAmDYWGQGTQVTVS-</p>                                                                      |

|     |                                                     |   |       |                                                                                                                                                                                                                                                                                                                                                                                                                                                                                                                                                                                                                                                                                                                                                                                                                                                                                                                                                                                                                                                                                                                                                                                                                                                            |
|-----|-----------------------------------------------------|---|-------|------------------------------------------------------------------------------------------------------------------------------------------------------------------------------------------------------------------------------------------------------------------------------------------------------------------------------------------------------------------------------------------------------------------------------------------------------------------------------------------------------------------------------------------------------------------------------------------------------------------------------------------------------------------------------------------------------------------------------------------------------------------------------------------------------------------------------------------------------------------------------------------------------------------------------------------------------------------------------------------------------------------------------------------------------------------------------------------------------------------------------------------------------------------------------------------------------------------------------------------------------------|
| 426 | <p>lsjvA<br/>(102)</p> <hr/> <p>lic4H<br/>(114)</p> | C | 40.20 | <p><b>TM-align:</b> aliSize=87 (resi) RMSD=1.75 (Å)<br/> -----G-GGLVQAGESLKLSCAA-----SG--GFMGYRQAFPGKQRELVATINSRITINADLVKGRFTSRDPAKKTIVLEMSLEPEDTAVVYCYTHYfrsywgggtqvtvss-----<br/> dvqlqeSgPSLVKPSQTLSTTCSVTgdSItSAYWSWIRKFFGNRLIYMGVYSYSSTYINPSLKSRISTRDTSKNQYLDLNSVTTEDTATYYCANWD-----gdYwgggtlvtvsaa</p> <p><b>SARST:</b> aliSize=81 (resi) RMSD=1.95 (Å)<br/> ggg-----LVQAGESLKLSCAASG-----GFMGYRQAFPGKQRELVATINSRITINADLVKGRFTSRDPAKKTIVLEMSLEPEDTAVVYCY-----thyfrsywgggtqvtvss<br/> ---dvqlqesgpsLVKPSQTLSTTCSVTgdsitsAYWSWIRKFFGNRLIYMGVYSYSSTYINPSLKSRISTRDTSKNQYLDLNSVTTEDTATYYCANWDgdYwgggtlvtvsaa-----</p> <p><b>BLAST:</b> aliSize=64 (resi) iden=41.18% (42/102) simi=62.75% (64/102)<br/> -----GGLVQAGESLKLSCAASG-----GFMGYRQAFPGKQRELVATINSRITINADLVKGRFTSRDPAKKTIVLEMSLEPEDTAVVYCYTHYFRSYWGGGTQVTVSS-<br/> dvqlqesGPSLVKPSQTLSTTCSVTgdsitsAYWSWIRKFFGNRLIYMGVYSYSSTYINPSLKSRISTRDTSKNQYLDLNSVTTEDTATYYCANWDGDYWGQGTLVTVSAA</p> <p><b>Proposed:</b> aliSize=100 (resi) RMSD=1.71 (Å)<br/> -----G-GGLVQAGESLKLSCAA-----SG--GFMGYRQAFPGKQRELVATINSRITINADLVKGRFTSRDPAKKTIVLEMSLEPEDTAVVYCYT-hyFRSYWGGGTQVTVSS-<br/> dvqlqeSgPSLVKPSQTLSTTCSVTgdSItSAYWSWIRKFFGNRLIYMGVYSYSSTYINPSLKSRISTRDTSKNQYLDLNSVTTEDTATYYCANw--DGDYWGQGTLVTVSAA</p>    |
| 427 | <p>lsjvA<br/>(102)</p> <hr/> <p>lic5H<br/>(114)</p> | C | 40.20 | <p><b>TM-align:</b> aliSize=87 (resi) RMSD=1.71 (Å)<br/> -----G-GGLVQAGESLKLSCAA-----SGGFMGYRQAFPGKQRELVATINSRITINADLVKGRFTSRDPAKKTIVLEMSLEPEDTAVVYCYTHYfrsywgggtqvtvss-----<br/> dvqlqeSgPSLVKPSQTLSTTCSVTgdsiTSDYWSWIRKFFGNRLIYMGVYSYSSTYINPSLKSRISTRDTSKNQYLDLNSVTTEDTATYYCANWA-----gdYwgggtlvtvsaa</p> <p><b>SARST:</b> aliSize=93 (resi) RMSD=16.21 (Å)<br/> ggg-----LVQAGESLKLSCAASGF-----MGYRQAFPGKQRELVATINSRITINADLVKGRFTSRDPAKKTIVLEMSLEPEDTAVVYCYthyFRS----YWGQGTQVTVSS--s<br/> ---dvqlqesgpsLVKPSQTLSTTCSVTDSi t sdyWSWIRKFFGNRLIYMGVYSYSSTYINPSLKSRISTRDTSKNQYLDLNSVTTEDTATY-----YCANwagdyWGQGTLVTVSaa-</p> <p><b>BLAST:</b> aliSize=64 (resi) iden=41.18% (42/102) simi=62.75% (64/102)<br/> -----GGLVQAGESLKLSCAASG-----FMGYRQAFPGKQRELVATINSRITINADLVKGRFTSRDPAKKTIVLEMSLEPEDTAVVYCYTHYFRSYWGGGTQVTVSS-<br/> dvqlqesGPSLVKPSQTLSTTCSVTgdsi t sdyWSWIRKFFGNRLIYMGVYSYSSTYINPSLKSRISTRDTSKNQYLDLNSVTTEDTATYYCANWAGDYWGQGTLVTVSAA</p> <p><b>Proposed:</b> aliSize=100 (resi) RMSD=1.66 (Å)<br/> -----G-GGLVQAGESLKLSCAA-----SGGFMGYRQAFPGKQRELVATINSRITINADLVKGRFTSRDPAKKTIVLEMSLEPEDTAVVYCYT-hyFRSYWGGGTQVTVSS-<br/> dvqlqeSgPSLVKPSQTLSTTCSVTgdsi t sdyWSWIRKFFGNRLIYMGVYSYSSTYINPSLKSRISTRDTSKNQYLDLNSVTTEDTATYYCANw--AGDYWGQGTLVTVSAA</p> |
| 428 | <p>lsjvA<br/>(102)</p> <hr/> <p>lic7H<br/>(114)</p> | C | 39.22 | <p><b>TM-align:</b> aliSize=88 (resi) RMSD=1.93 (Å)<br/> -----G-GGLVQAGESLKLSCAA-----SGGFMGYRQAFPGKQRELVATINSRITINADLVKGRFTSRDPAKKTIVLEMSLEPEDTAVVYCYTHYFRsywgggtqvtvss-----<br/> dvqlqeSgPSLVKPSQTLSTTCSVTgdsiTSAYWSWIRKFFGNRLIYMGVYSYSSTYINPSLKSRISTRDTSKNQYLDLNSVTTEDTATYYCANWAG-----dywgggtlvtvsaa</p> <p><b>SARST:</b> aliSize=93 (resi) RMSD=16.19 (Å)<br/> ggg-----LVQAGESLKLSCAASGF-----MGYRQAFPGKQRELVATINSRITINADLVKGRFTSRDPAKKTIVLEMSLEPEDTAVVYCYthyFRS----YWGQGTQVTVSS--s<br/> ---dvqlqesgpsLVKPSQTLSTTCSVTDSi t sayWSWIRKFFGNRLIYMGVYSYSSTYINPSLKSRISTRDTSKNQYLDLNSVTTEDTATY-----YCANwagdyWGQGTLVTVSaa-</p> <p><b>BLAST:</b> aliSize=64 (resi) iden=41.18% (42/102) simi=62.75% (64/102)<br/> -----GGLVQAGESLKLSCAASG-----GFMGYRQAFPGKQRELVATINSRITINADLVKGRFTSRDPAKKTIVLEMSLEPEDTAVVYCYTHYFRSYWGGGTQVTVSS-<br/> dvqlqesGPSLVKPSQTLSTTCSVTgdsi t sayWSWIRKFFGNRLIYMGVYSYSSTYINPSLKSRISTRDTSKNQYLDLNSVTTEDTATYYCANWAGDYWGQGTLVTVSAA</p> <p><b>Proposed:</b> aliSize=100 (resi) RMSD=1.63 (Å)<br/> -----G-GGLVQAGESLKLSCAA-----SGGFMGYRQAFPGKQRELVATINSRITINADLVKGRFTSRDPAKKTIVLEMSLEPEDTAVVYCYT-hyFRSYWGGGTQVTVSS-<br/> dvqlqeSgPSLVKPSQTLSTTCSVTgdsiTSAYWSWIRKFFGNRLIYMGVYSYSSTYINPSLKSRISTRDTSKNQYLDLNSVTTEDTATYYCANw--AGDYWGQGTLVTVSAA</p>  |

|     |                                                          |   |       |                                                                                                                                                                                                                                                                                                                                                                                                                                                                                                                                                                                                                                                                                                                                                                                                                                                                                                                                                                                                                                                                                                                                                                                                                                                                                                                                                                                                                                                                                                                                                                   |
|-----|----------------------------------------------------------|---|-------|-------------------------------------------------------------------------------------------------------------------------------------------------------------------------------------------------------------------------------------------------------------------------------------------------------------------------------------------------------------------------------------------------------------------------------------------------------------------------------------------------------------------------------------------------------------------------------------------------------------------------------------------------------------------------------------------------------------------------------------------------------------------------------------------------------------------------------------------------------------------------------------------------------------------------------------------------------------------------------------------------------------------------------------------------------------------------------------------------------------------------------------------------------------------------------------------------------------------------------------------------------------------------------------------------------------------------------------------------------------------------------------------------------------------------------------------------------------------------------------------------------------------------------------------------------------------|
| 429 | <p><b>IsvA (102)</b></p> <hr/> <p><b>IjhlH (116)</b></p> | C | 41.18 | <p><b>TM-align:</b> aliSize=89 (resi) RMSD=1.77 (Å)<br/> -----GGGLVQAGEESLKLSCAA----S--GGFMGYRQAPGKQRELVAITINS-RGITNYADFVKGRFTISRDNAKKIVYLEMNSLEPEDTAVYYCYTHYFRS<sup>hyfrs</sup>ywgggtqvtvss-----<br/> qvqlqasGAELVRPAA<sup>ASV</sup>KLSCA<sup>KAS</sup>gyTfiSYWINVVKR<sup>FG</sup>GLEWIGNIYPSDSYINYNQKFDKAILTVKSSSTAYMQLSSPTSEDSAVYYCTR<sup>DDNY</sup>-----gamdywgggtttvtv</p> <p><b>SARST:</b> aliSize=83 (resi) RMSD=2.03 (Å)<br/> gg-----GLVQAGEESLKLSCAAASG-----GFMGYRQAPGKQRELVAITINSR-GITNYADFVKGRFTISRDNAKKIVYLEMNSLEPEDTAVYYCYT-----hyfrs<sup>hyfrs</sup>ywgggtqvtvss<br/> --qvqlqasgaELVRPAA<sup>ASV</sup>KLSCA<sup>KAS</sup>gyTfisyWINVVKR<sup>FG</sup>GLEWIGNIYPSdSYINYNQKFDKAILTVKSSSTA<sup>MQLS</sup>PTSEDSAVYYCTR<sup>ddnygamd</sup>ywgggtttvtv-----</p> <p><b>BLAST:</b> aliSize=62 (resi) iden=44.12% (45/102) simi=60.78% (62/102)<br/> -----GGGLVQAGEESLKLSCAAASG-----FMGYRQAPGKQRELVAITINS-RGITNYADFVKGRFTISRDNAKKIVYLEMNSLEPEDTAVYYCY--THY-FRS<sup>YWGQGTQVTV</sup>ss<br/> qvqlqasGAELVRPAA<sup>ASV</sup>KLSCA<sup>KAS</sup>gyTfisyWINVVKR<sup>FG</sup>GLEWIGNIYpSDSYINYNQKFDKAILTVKSSSTAYMQLSSPTSEDSAVYYCTR<sup>DDNY</sup>gAM<sup>DYWGQGTITVT</sup>--</p> <p><b>Proposed:</b> aliSize=100 (resi) RMSD=1.65 (Å)<br/> -----GGGLVQAGEESLKLSCAA----S--GGFMGYRQAPGKQRELVAITINS-RGITNYADFVKGRFTISRDNAKKIVYLEMNSLEPEDTAVYYCYTH--YFRS<sup>YWGQGTQVTV</sup>ss<br/> qvqlqasGAELVRPAA<sup>ASV</sup>KLSCA<sup>KAS</sup>gyTfiSYWINVVKR<sup>FG</sup>GLEWIGNIYPSDSYINYNQKFDKAILTVKSSSTAYMQLSSPTSEDSAVYYCTR<sup>DDnYGAM</sup>DYWGQGTITVT--</p>              |
| 430 | <p><b>IsvA (102)</b></p> <hr/> <p><b>IjtoA (132)</b></p> | C | 72.55 | <p><b>TM-align:</b> aliSize=89 (resi) RMSD=1.71 (Å)<br/> -----GGGLVQAGEESLKLSCAA----SGGFMGYRQAPGKQRELVAITINS-RGITNYADFVKGRFTISRDNAKKIVYLEMNSLEPEDTAVYYCYTHYFRS<sup>YWGQGTQVTVSS</sup>-----<br/> vqlqasGGGSVQAGGSLRLSCAAsgytiGPYCMGWFRQAPGKERE<sup>GVA</sup>AINMGGGITTYADSVKGRFTISQDNAKNTVYLLMNSLEPEDTAIYYCAADSTIY<sup>asyyecghl</sup>stgggyd<sup>swgggtqvtvss</sup></p> <p><b>SARST:</b> aliSize=100 (resi) RMSD=16.11 (Å)<br/> g-----GGLVQAGEESLKLSCA---ASGDF--MGWYRQAPGKQRELVAITINSR-GITNYADFVKGRFTISRDNAKKIVYLEMNSLEPEDTAVYYCYTHYFRS<sup>YWGQGTQVTVSS</sup>-s<br/> -vqlqasgGGSVQAGGSLRLSCAasgYTIIPycMGWFRQAPGKERE<sup>GVA</sup>AINMGGGITTYADSVKGRFTISQDNAKNTVYLLMNSLEPEDTAIYYCAADSTIY<sup>asyyecghl</sup>stgggyd<sup>SWGQGTQVTVSS</sup>-s</p> <p><b>BLAST:</b> aliSize=87 (resi) iden=79.41% (81/102) simi=85.29% (87/102)<br/> -----GGGLVQAGEESLKLSCAAASG-----FMGYRQAPGKQRELVAITINS-RGITNYADFVKGRFTISRDNAKKIVYLEMNSLEPEDTAVYYC-----YTHYFR<sup>SY</sup>-----WGQGTQVTVSS<br/> vqlqasGGGSVQAGGSLRLSCAAsgytiGpyCMGWFRQAPGKERE<sup>GVA</sup>AINmGGGITTYADSVKGRFTISQDNAKNTVYLLMNSLEPEDTAIYYCAadstiYASYYE<sup>cgghl</sup>stgGy<sup>gdswgggtqvtvss</sup></p> <p><b>Proposed:</b> aliSize=101 (resi) RMSD=1.34 (Å)<br/> g-----GGLVQAGEESLKLSCA---SGGFMGYRQAPGKQRELVAITINS-RGITNYADFVKGRFTISRDNAKKIVYLEMNSLEPEDTAVYYCYTHYF<sup>RS</sup>-----RS-Y<sup>WGQGTQVTVSS</sup><br/> -vqlqasgGGSVQAGGSLRLSCAAsgytiGPYCMGWFRQAPGKERE<sup>GVA</sup>AINMGGGITTYADSVKGRFTISQDNAKNTVYLLMNSLEPEDTAIYYCAADSTIY<sup>asyyecghl</sup>stgggy<sup>GyDswgggtqvtvss</sup></p>                  |
| 431 | <p><b>IsvA (102)</b></p> <hr/> <p><b>IjtpA (135)</b></p> | C | 72.55 | <p><b>TM-align:</b> aliSize=90 (resi) RMSD=1.63 (Å)<br/> -----GGGLVQAGEESLKLSCAA----SGGFMGYRQAPGKQRELVAITINS-RGITNYADFVKGRFTISRDNAKKIVYLEMNSLEPEDTAVYYCYTHYFRS<sup>YWGQGTQVTVSS</sup>-----<br/> dvqlqasGGGSVQAGGSLRLSCAAsgytiGPYCMGWFRQAPGKERE<sup>GVA</sup>AINmGGGITTYADSVKGRFTISQDNAKNTVYLLMNSLEPEDTAIYYCAADSTIY<sup>asyyecghl</sup>stgggyd<sup>swgggtqvtvssrr</sup></p> <p><b>SARST:</b> aliSize=85 (resi) RMSD=1.74 (Å)<br/> g-----GGLVQAGEESLKLSCA---ASGDF--MGWYRQAPGKQRELVAITINS-RGITNYADFVKGRFTISRDNAKKIVYLEMNSLEPEDTAVYYCYTH-----yfrs<sup>ywgggtqvtvss</sup><br/> -dvqlqasgGGSVQAGGSLRLSCAasgYTIIPycMGWFRQAPGKERE<sup>GVA</sup>AINMGGGITTYADSVKGRFTISQDNAKNTVYLLMNSLEPEDTAIYYCAADs<sup>tiasyyecghl</sup>stgggyd<sup>swgggtqvtvssrr</sup>-----</p> <p><b>BLAST:</b> aliSize=87 (resi) iden=79.41% (81/102) simi=85.29% (87/102)<br/> -----GGGLVQAGEESLKLSCAAASG-----FMGYRQAPGKQRELVAITINS-RGITNYADFVKGRFTISRDNAKKIVYLEMNSLEPEDTAVYYC-----YTHYFR<sup>SY</sup>-----WGQGTQVTVSS<br/> dvqlqasGGGSVQAGGSLRLSCAAsgytiGpyCMGWFRQAPGKERE<sup>GVA</sup>AINmGGGITTYADSVKGRFTISQDNAKNTVYLLMNSLEPEDTAIYYCAadstiYASYYE<sup>cgghl</sup>stgGy<sup>gdswgggtqvtvssrr</sup></p> <p><b>Proposed:</b> aliSize=101 (resi) RMSD=1.13 (Å)<br/> g-----GGLVQAGEESLKLSCA---SGGFMGYRQAPGKQRELVAITINS-RGITNYADFVKGRFTISRDNAKKIVYLEMNSLEPEDTAVYYCYTHYF<sup>RS</sup>-----R-SY<sup>WGQGTQVTVSS</sup>--<br/> -dvqlqasgGGSVQAGGSLRLSCAAsgytiGPYCMGWFRQAPGKERE<sup>GVA</sup>AINMGGGITTYADSVKGRFTISQDNAKNTVYLLMNSLEPEDTAIYYCAADSTIY<sup>asyyecghl</sup>stgggy<sup>GyDswgggtqvtvssrr</sup></p> |



|     |                                               |   |       |                                                                                                                                                                                                                                                                                                                                                                                                                                                                                                                                                                                                                                                                                                                                                                                                                                                                                                                                                                                                                                                                                                                                                                                                                                                                                                                                                                           |
|-----|-----------------------------------------------|---|-------|---------------------------------------------------------------------------------------------------------------------------------------------------------------------------------------------------------------------------------------------------------------------------------------------------------------------------------------------------------------------------------------------------------------------------------------------------------------------------------------------------------------------------------------------------------------------------------------------------------------------------------------------------------------------------------------------------------------------------------------------------------------------------------------------------------------------------------------------------------------------------------------------------------------------------------------------------------------------------------------------------------------------------------------------------------------------------------------------------------------------------------------------------------------------------------------------------------------------------------------------------------------------------------------------------------------------------------------------------------------------------|
| 432 | <p>lsjvA<br/>(102)</p> <p>ljtpB<br/>(133)</p> | C | 73.53 | <p><b>TM-align:</b> aliSize=91 (resi) RMSD=1.84 (Å)<br/> -----G-GGLVQAGEESLKLSCAA-----S-GFMGWYRQAPGKQRELVAITINS-RGITNYADFVKGRFTISRDNAKKTVYLEMNSLEPEDTAVYYCYTHYFRSYwgqgtqvtvss-----<br/> dvqlqaSgGGSVQAGGSLRLSCAASgytItpYCMGWFRQAPGKEREVAAINMGGITTYADSVKGRFTISQDNAKNTVYLLMNSLEPEDTAIYYCAADSTIYA-----syyecghglstgggydswgqgtqvtvss</p> <p><b>SARST:</b> aliSize=85 (resi) RMSD=1.76 (Å)<br/> g-----GGLVQAGEESLKLSCAAS-----G-FM--MGWYRQAPGKQRELVAITINS-RGITNYADFVKGRFTISRDNAKKTVYLEMNSLEPEDTAVYYCYTH-----yfrsywgqgtqvtvss<br/> -dvqlqasgGGSVQAGGSLRLSCAASgytItpYCMGWFRQAPGKEREVAAINMGGITTYADSVKGRFTISQDNAKNTVYLLMNSLEPEDTAIYYCAADStiyasyecghglstgggydswgqgtqvtvss-----</p> <p><b>BLAST:</b> aliSize=87 (resi) iden=79.41% (81/102) simi=85.29% (87/102)<br/> -----GGGLVQAGEESLKLSCAASG-----G--FMGWYRQAPGKQRELVAITINS-RGITNYADFVKGRFTISRDNAKKTVYLEMNSLEPEDTAVYYCY-----YTHYFR-----SY-----WGQGTQVTVSS<br/> dvqlqasGGGSVQAGGSLRLSCAASgytItpYCMGWFRQAPGKEREVAAINMGGITTYADSVKGRFTISQDNAKNTVYLLMNSLEPEDTAIYYCAADStiYASYEcghglstgggydsWGQGTQVTVSS</p> <p><b>Proposed:</b> aliSize=101 (resi) RMSD=1.13 (Å)<br/> g-----GGLVQAGEESLKLSCAA-----S-GFMGWYRQAPGKQRELVAITINS-RGITNYADFVKGRFTISRDNAKKTVYLEMNSLEPEDTAVYYCYTHYF-----R-SYWGQGTQVTVSS<br/> -dvqlqasgGGSVQAGGSLRLSCAASgytItpYCMGWFRQAPGKEREVAAINMGGITTYADSVKGRFTISQDNAKNTVYLLMNSLEPEDTAIYYCAADSTiyasyecghglstgggydsWGQGTQVTVSS</p> |
| 433 | <p>lsjvA<br/>(102)</p> <p>lkxqE<br/>(120)</p> | C | 66.67 | <p><b>TM-align:</b> aliSize=88 (resi) RMSD=1.70 (Å)<br/> -----G-GGLVQAGEESLKLSCAA-----S-GGFMGWYRQAPGKQRELVAITINS-RGITNYADFVKGRFTISRDNAKKTVYLEMNSLEPEDTAVYYCYTHYFRsywgqgtqvtvss-----<br/> qvqlveSgGGSVQAGGSLRLSCAASstYTDTVGWFRQAPGKEREVAAIYRRTTYTYSADSVKGRFTLSQDNNTVYLLQMSLKPEDTIGIYYCATGNS-----vrlaswegyfywgqgtqvtvss</p> <p><b>SARST:</b> aliSize=99 (resi) RMSD=14.70 (Å)<br/> g-----GGLVQAGEESLKLSCAASGGF--MGWYRQAPGKQRELVAITINS-RGITNYADFVKGRFTISRDNAKKTVYLEMNSLEPEDTAVYYCYTHYFRS-----YWGQGTQVTV--ss<br/> -qvqlvesgGGSVQAGGSLRLSCAASTYTdtVGVFRQAPGKEREVAAIYRRTTYTYSADSVKGRFTLSQDNNTVYLLQMSLKPEDTIGIYYCATGNSVrlaswegyfyWGQGTQVTV--ss--</p> <p><b>BLAST:</b> aliSize=81 (resi) iden=71.57% (73/102) simi=79.41% (81/102)<br/> -----GGGLVQAGEESLKLSCAASG--GFMGWYRQAPGKQRELVAITINS-RGITNYADFVKGRFTISRDNAKKTVYLEMNSLEPEDTAVYYCY-----HYFRsyWGQGTQVTVSS<br/> qvqlvesGGGSVQAGGSLRLSCAASTYtDTVGVFRQAPGKEREVAAIYRRTTYTYSADSVKGRFTLSQDNNTVYLLQMSLKPEDTIGIYYCATGnsvrlasweGYF--YWGQGTQVTVSS</p> <p><b>Proposed:</b> aliSize=100 (resi) RMSD=1.43 (Å)<br/> g-----GGLVQAGEESLKLSCAA-----S-GGFMGWYRQAPGKQRELVAITINS-RGITNYADFVKGRFTISRDNAKKTVYLEMNSLEPEDTAVYYCYHyF-----RS-YWGQGTQVTVSS<br/> -qvqlvesgGGSVQAGGSLRLSCAASstYTDTVGVFRQAPGKEREVAAIYRRTTYTYSADSVKGRFTLSQDNNTVYLLQMSLKPEDTIGIYYCATG-NsvrlasweGYfyWGQGTQVTVSS</p>                                                             |
| 434 | <p>lsjvA<br/>(102)</p> <p>lmvfA<br/>(126)</p> | C | 68.63 | <p><b>TM-align:</b> aliSize=89 (resi) RMSD=1.41 (Å)<br/> -----G-GGLVQAGEESLKLSCAA-----S-GGFMGWYRQAPGKQRELVAITINS-RGITNYADFVKGRFTISRDNAKKTVYLEMNSLEPEDTAVYYCYTHYFRsywgqgtqvtvss-----<br/> qvqlveSgGGSVQAGGSLRLSCAASgftYsRKYMGWFRQAPGKEREVAAIFIdNGNTIYADSVKGRFTISQDNAKNTVYLLQMSLKPEDTAMYYCAASSRW-----mdysaltakaynswgqgtqvtvss</p> <p><b>SARST:</b> aliSize=99 (resi) RMSD=16.00 (Å)<br/> gg-----GLVQAGEESLKLSCA-----ASGGFMGWYRQAPGKQRELVAITINS-RGITNYADFVKGRFTISRDNAKKTVYLEMNSLEPEDTAVYYCYTHYF-----RSYWGQGTQVTVS--s<br/> --qvqlvesggGGSVQAGGSLRLSCAASgftYsRKYMGWFRQAPGKEREVAAIFIdNGNTIYADSVKGRFTISQDNAKNTVYLLQMSLKPEDTAMYYCAASSRwmdysaltakaynswgqgtqvtvss--</p> <p><b>BLAST:</b> aliSize=87 (resi) iden=73.53% (75/102) simi=85.29% (87/102)<br/> -----GGGLVQAGEESLKLSCAASG-----GFMGWYRQAPGKQRELVAITINS-RGITNYADFVKGRFTISRDNAKKTVYLEMNSLEPEDTAVYYCY-----YTHY-----FRSY--WGQGTQVTVSS<br/> qvqlvesGGGSVQAGGSLRLSCAASgftysRKYMGWFRQAPGKEREVAAIFIdNGNTIYADSVKGRFTISQDNAKNTVYLLQMSLKPEDTAMYYCAASSrWMDYsAltakAYnsWGQGTQVTVSS</p> <p><b>Proposed:</b> aliSize=101 (resi) RMSD=1.12 (Å)<br/> g-----GGLVQAGEESLKLSCAA-----S-GGFMGWYRQAPGKQRELVAITINS-RGITNYADFVKGRFTISRDNAKKTVYLEMNSLEPEDTAVYYCYTHYF-----RSYWGQGTQVTVSS<br/> -qvqlvesgGGSVQAGGSLRLSCAASgftYsRKYMGWFRQAPGKEREVAAIFIdNGNTIYADSVKGRFTISQDNAKNTVYLLQMSLKPEDTAMYYCAASSRwmdysaltakAYnsWGQGTQVTVSS</p>                       |

|     |             |   |       |                                                                                                                                                                                                                                                                                                                                                                                                                                                                                                                                                                                                                                                                                                                                                                                                                                                                                                                                                                                                     |
|-----|-------------|---|-------|-----------------------------------------------------------------------------------------------------------------------------------------------------------------------------------------------------------------------------------------------------------------------------------------------------------------------------------------------------------------------------------------------------------------------------------------------------------------------------------------------------------------------------------------------------------------------------------------------------------------------------------------------------------------------------------------------------------------------------------------------------------------------------------------------------------------------------------------------------------------------------------------------------------------------------------------------------------------------------------------------------|
| 435 | IsjvA (102) | C | 44.12 | <p><b>TM-align:</b> aliSize=89 (resi) RMSD=1.78 (Å)</p> <pre> -----GGGLVQAGEESLKLSCAA---S--GGFVGVYRQAPGKQRELVAITN-SRGITNYADFVKGRFTISRQNAKKTIVYLEMNSLEPEDTAVVYCYTHYFRsywgqgtqvtvss----- evqlqqsPELKKPGETVKISCKATnyAftDYSVHVKQAPGGDLKYVWVntETDEPTFADDFKGRFAFSLDTSTSAFLQINNKNEDTATYFVRDRHD-----ygeiftywgqgttvtvsa </pre>                                                                                                                                                                                                                                                                                                                                                                                                                                                                                                                                                                                                                                                                               |
|     | In4xH (120) |   |       | <p><b>SARST:</b> aliSize=84 (resi) RMSD=2.10 (Å)</p> <pre> gg-----GLVQAGEESLKLSCAASG-----GFVGVYRQAPGKQRELVAITNS-RGITNYADFVKGRFTISRQNAKKTIVYLEMNSLEPEDTAVVYCYTH-----yfrsywgqgtqvtvss --evqlqqsGPELKKPGETVKISCKATnyAftDYSVHVKQAPGGDLKYVWVntETDEPTFADDFKGRFAFSLDTSTSAFLQINNKNEDTATYFVRDrhdygeiftywgqgttvtvsa----- </pre> <p><b>BLAST:</b> aliSize=66 (resi) iden=47.06% (48/102) simi=64.71% (66/102)</p> <pre> -----GGGLVQAGEESLKLSCAASG-GF-----GVYRQAPGKQRELVAITNSR-GITNYADFVKGRFTISRQNAKKTIVYLEMNSLEPEDTAVVYCY-----YTHYFRSYWGOGTQVTVSS evqlqqsGPELKKPGETVKISCKATnyAftdysVHVKQAPGGDLKYVWVntETDEPTFADDFKGRFAFSLDTSTSAFLQINNKNEDTATYFvrdrhdYGEIF-TYWGOGTQVTVSA </pre> <p><b>Proposed:</b> aliSize=102 (resi) RMSD=1.55 (Å)</p> <pre> -----GGGLVQAGEESLKLSCAA---S--GGFVGVYRQAPGKQRELVAITN-SRGITNYADFVKGRFTISRQNAKKTIVYLEMNSLEPEDTAVVYCYTHYF---RS-YWGOGTQVTVSS evqlqqsPELKKPGETVKISCKATnyAftDYSVHVKQAPGGDLKYVWVntETDEPTFADDFKGRFAFSLDTSTSAFLQINNKNEDTATYFVRDRHdygeIFtYWGOGTQVTVSA </pre>                 |
| 436 | IsjvA (102) | C | 35.29 | <p><b>TM-align:</b> aliSize=89 (resi) RMSD=1.77 (Å)</p> <pre> -----GGGLVQAGEESLKLSCAA---S--GGFVGVYRQAPGKQRELVAITN-SRGITNYADFVKGRFTISRQNAKKTIVYLEMNSLEPEDTAVVYCYTHYFRsywgqgtqvtvss----- evqlqqsPELKKPGETVKISCKATnyAftDYSVHVKQAPGGDLKYVWVntETDEPTFADDFKGRFAFSLDTSTSAFLQINNKNEDTATYFVRDRHD-----ygeiftywgqgttvtvss </pre>                                                                                                                                                                                                                                                                                                                                                                                                                                                                                                                                                                                                                                                                               |
|     | In4xI (119) |   |       | <p><b>SARST:</b> aliSize=76 (resi) RMSD=16.51 (Å)</p> <pre> gg-----GLVQAGEESLKLSCAASGG-----FVGVYRQAPGKQRELVAITNSRGItnyadvfk-----RFTISRQNAKKTIVYLEMNSLEPEDTAVVYCYTH-----YFRSYWGOGTQVTV--ss --evqlqqsGPELKKPGETVKISCKATnyAftDYSVHVKQAPG-----gdlkyvgwintetdeptfaddfkgRFAFSLDTSTSAFLQINNKNEDTATYFVRDrhdygeIIFTYWGOGTQVTV-- </pre> <p><b>BLAST:</b> aliSize=65 (resi) iden=47.06% (48/102) simi=63.73% (65/102)</p> <pre> -----GGGLVQAGEESLKLSCAASG-GF-----GVYRQAPGKQRELVAITNSR-GITNYADFVKGRFTISRQNAKKTIVYLEMNSLEPEDTAVVYCY-----YTHYFRSYWGOGTQVTVSS evqlqqsGPELKKPGETVKISCKATnyAftdysVHVKQAPGGDLKYVWVntETDEPTFADDFKGRFAFSLDTSTSAFLQINNKNEDTATYFvrdrhdYGEIF-TYWGOGTQVTV-- </pre> <p><b>Proposed:</b> aliSize=102 (resi) RMSD=1.72 (Å)</p> <pre> -----GGGLVQAGEESLKLSCAA---S--GGFVGVYRQAPGKQRELVAITN-SRGITNYADFVKGRFTISRQNAKKTIVYLEMNSLEPEDTAVVYCYTHYF---RSYWGOGTQVTVSS evqlqqsPELKKPGETVKISCKATnyAftDYSVHVKQAPGGDLKYVWVntETDEPTFADDFKGRFAFSLDTSTSAFLQINNKNEDTATYFVRDRHdygeIFTYWGOGTQVTVSS </pre>          |
| 437 | IsjvA (102) | C | 41.18 | <p><b>TM-align:</b> aliSize=89 (resi) RMSD=1.80 (Å)</p> <pre> -----GGGLVQAGEESLKLSCAA---S--GGFVGVYRQAPGKQRELVAITN-SRGITNYADFVKGRFTISRQNAKKTIVYLEMNSLEPEDTAVVYCYTHYFRsywgqgtqvtvss----- qvqlqqsGAELVKPAAASVRMSCKASgyTftNYNYVVKVSPGQGLEWIGIFYPNGDTSNQKFKDKALTLAKSSNTAYMQLSSLTSEDSAVVYCARSGGS-----yrydggfdywgqgttvtvss </pre>                                                                                                                                                                                                                                                                                                                                                                                                                                                                                                                                                                                                                                                                          |
|     | InmcH (122) |   |       | <p><b>SARST:</b> aliSize=83 (resi) RMSD=5.64 (Å)</p> <pre> gg-----GLVQAGEESLKLSCAASG-----FVGVYRQAPGKQRELVAITNSRGItnyadvfk-----RFTISRQNAKKTIVYLEMNSLEPEDTAVVYCYTH-----hyfrsywgqgtqvtvss --qvqlqqsGAELVKPAAASVRMSCKASgyTftNYNYVVKVSPGQGLEWIGIFYPNGDTSNQKFKDKALTLAKSSNTAYMQLSSLTSEDSAVVYCARsggsyrydggfdywgqgttvtvss----- </pre> <p><b>BLAST:</b> aliSize=65 (resi) iden=46.08% (47/102) simi=63.73% (65/102)</p> <pre> -----GGGLVQAGEESLKLSCAASG-GF-----GVYRQAPGKQRELVAITN-SRGITNYADFVKGRFTISRQNAKKTIVYLEMNSLEPEDTAVVYCY-----YTHYFRSYWGOGTQVTVSS qvqlqqsGAELVKPAAASVRMSCKASgyTftnynYVVKVSPGQGLEWIGIFYPNGDTSNQKFKDKALTLAKSSNTAYMQLSSLTSEDSAVVYCARsggsyrydGGFDYWGOGTQVTVSS </pre> <p><b>Proposed:</b> aliSize=102 (resi) RMSD=1.69 (Å)</p> <pre> -----GGGLVQAGEESLKLSCAA---S--GGFVGVYRQAPGKQRELVAITN-SRGITNYADFVKGRFTISRQNAKKTIVYLEMNSLEPEDTAVVYCYTH-Y-----FRS-YWGOGTQVTVSS qvqlqqsGAELVKPAAASVRMSCKASgyTftNYNYVVKVSPGQGLEWIGIFYPNGDTSNQKFKDKALTLAKSSNTAYMQLSSLTSEDSAVVYCARSGsrydGGFDYWGOGTQVTVSS </pre> |

|     |                                             |   |       |                                                                                                                                                                                                                                                                                                                                                                                                                                                                                                                                                                                                                                                                                                                                                                                                                                                                                                                                                                                                                                                                                                                                                                                                                                                                                                                                                                                                                                                                                                                                                                                                                                                                                                                                                                                                                                     |
|-----|---------------------------------------------|---|-------|-------------------------------------------------------------------------------------------------------------------------------------------------------------------------------------------------------------------------------------------------------------------------------------------------------------------------------------------------------------------------------------------------------------------------------------------------------------------------------------------------------------------------------------------------------------------------------------------------------------------------------------------------------------------------------------------------------------------------------------------------------------------------------------------------------------------------------------------------------------------------------------------------------------------------------------------------------------------------------------------------------------------------------------------------------------------------------------------------------------------------------------------------------------------------------------------------------------------------------------------------------------------------------------------------------------------------------------------------------------------------------------------------------------------------------------------------------------------------------------------------------------------------------------------------------------------------------------------------------------------------------------------------------------------------------------------------------------------------------------------------------------------------------------------------------------------------------------|
| 438 | <p>IsjvA (102)</p> <hr/> <p>InqbA (232)</p> | C | 26.47 | <p><b>TM-align:</b> aliSize=89 (resi) RMSD=1.60 (Å)<br/> -----GGGLVQAGESLKLSCAA---S---GGFMGYRQAPGKQRELVAATNSRRIINADYFKGRFTISRDNAKKTVYLEMNSLEPEDTAVYYCYTHYFRSYWGGTQVTVSS-----<br/> vqlqqsGAEVAKPCAIVKLSCKISgyTftSYWHVVKQRGRGLWIGRIDpNSGTKNEKFAASKALTLVDPKSSAYMQLSSITSEDSAVYYCARYDYI-----gssyfydwggtvtvssdieltqtplslpvsldqasiscrsssqsvhsngntylewylqkpgqspklliykvsnrfgsvpdrfsgs</p> <p>rfgsvpdrfsgsgsgtdftlkisrveadlgvyycfqgshvpytfgggtkleikr</p> <p><b>SARST:</b> aliSize=97 (resi) RMSD=18.32 (Å)<br/> gg-GLVOA-----ESLKLSCA---AASG---GFMGYRQAPGKQRELVAATNSRRIINADYFKGRFTISRDNAKKTVYLEMNSLEPEDTAVYYCY-----THYFRSYWGGTQVTVSS-----<br/> --qLQSSGaelvkpGASVKLSCkaSGYTftsYWHVVKQRGRGLWIGRIDpNSGTKNEKFAASKALTLVDPKSSAYMQLSSITSEDSAVYYCARYdygssyfydwgqGITVTVSSDIELTQVTVSSdieltqtplslpvsldqasiscrsssqsvhsngntylewylqkpgqspklliykvsnrfgsvpdrfsgs</p> <p>-----vss<br/> gsgtdftlkisrveadlgvyycfqgshvpytfgggtkleikr---</p> <p><b>BLAST:</b> aliSize=68 (resi) iden=50.00% (51/102) simi=66.67% (68/102)<br/> -----GGGLVQAGESLKLSCAA---S---GFMGYRQAPGKQRELVAATNSRRIINADYFKGRFTISRDNAKKTVYLEMNSLEPEDTAVYYCY-----THYFRSYWGGTQVTVSS-----<br/> qllqqsGAEVAKPCAIVKLSCKISgyTftsYWHVVKQRGRGLWIGRIDpNSGTKNEKFAASKALTLVDPKSSAYMQLSSITSEDSAVYYCARYDYI-----gssyfydwgqGITVTVSSdieltqtplslpvsldqasiscrsssqsvhsngntylewylqkpgqspklliykvsnrfgsvpdrfsgs</p> <p>-----vss<br/> sgtdftlkisrveadlgvyycfqgshvpytfgggtkleikr---</p> <p><b>Proposed:</b> aliSize=96 (resi) RMSD=1.89 (Å)<br/> vqlqqsGAEVAKPCAIVKLSCKISgyTftsYWHVVKQRGRGLWIGRIDpNSGTKNEKFAASKALTLVDPKSSAYMQLSSITSEDSAVYYCARYdygssyfydwgqGITVTVSSDIELTQVTVSSdieltqtplslpvsldqasiscrsssqsvhsngntylewylqkpgqspklliykvsnrfgsvpdrfsgs</p> <p>GGGLVQAGESLKLSCAA---S---GFMGYRQAPGKQRELVAATNSRRIINADYFKGRFTISRDNAKKTVYLEMNSLEPEDTAVYYCYTHYFRSYWGGTQVTVSS<br/> SGSGG---TDFTLKISRVEADLGYYCFQgshvpytfgggtkleikr</p> |
| 439 | <p>IsjvA (102)</p> <hr/> <p>Iri8A (124)</p> | C | 67.65 | <p><b>TM-align:</b> aliSize=89 (resi) RMSD=1.76 (Å)<br/> -----G-GGLVQAGESLKLSCAA---S---GFMGYRQAPGKQRELVAATNSRRIINADYFKGRFTISRDNAKKTVYLEMNSLEPEDTAVYYCYTHYFRSYWGGTQVTVSS-----<br/> vqlvesgGGSVQAGGSLRLSCAVsgykDRnYCMGWFRAPGKEREgVAVIDSSRTAYADSVKGRFTISRDLDTAYLQMNLSKPEDTAMYYCAAGWSS-----lgscgtnrnrnywgggtqvtvss</p> <p><b>SARST:</b> aliSize=100 (resi) RMSD=16.27 (Å)<br/> g-----GGLVQAGESLKLSCAA---S---GFMGYRQAPGKQRELVAATNSRRIINADYFKGRFTISRDNAKKTVYLEMNSLEPEDTAVYYCYTHYFRSYWGGTQVTVSS-----<br/> -vqlvesgGGSVQAGGSLRLSCAVsgykDRnYCMGWFRAPGKEREgVAVIDSSRTAYADSVKGRFTISRDLDTAYLQMNLSKPEDTAMYYCAAGWSSlgscgtnrnrnywgggtqvtvss</p> <p><b>BLAST:</b> aliSize=85 (resi) iden=72.55% (74/102) simi=83.33% (85/102)<br/> -----G-GGLVQAGESLKLSCAA---S---GFMGYRQAPGKQRELVAATNSRRIINADYFKGRFTISRDNAKKTVYLEMNSLEPEDTAVYYCYTHYFRSYWGGTQVTVSS-----<br/> vqlvesgGGSVQAGGSLRLSCAVsgykDRnYCMGWFRAPGKEREgVAVIDSSRTAYADSVKGRFTISRDLDTAYLQMNLSKPEDTAMYYCAAGWSSlgscgtnrnrnywgggtqvtvss</p> <p><b>Proposed:</b> aliSize=100 (resi) RMSD=1.35 (Å)<br/> g-----GGLVQAGESLKLSCAA---S---GFMGYRQAPGKQRELVAATNSRRIINADYFKGRFTISRDNAKKTVYLEMNSLEPEDTAVYYCYTHYFRSYWGGTQVTVSS-----<br/> -vqlvesgGGSVQAGGSLRLSCAVsgykDRnYCMGWFRAPGKEREgVAVIDSSRTAYADSVKGRFTISRDLDTAYLQMNLSKPEDTAMYYCAAGWSSlgscgtnrnrnywgggtqvtvss</p>                                                                                                                                                                                                                                                                                                                                                                                                                                                                                                                                               |
| 440 | <p>IsjvA (102)</p> <hr/> <p>It2jA (116)</p> | C | 62.75 | <p><b>TM-align:</b> aliSize=86 (resi) RMSD=1.32 (Å)<br/> -----G-GGLVQAGESLKLSCAA---S---GGFMGYRQAPGKQRELVAATNSRRIINADYFKGRFTISRDNAKKTVYLEMNSLEPEDTAVYYCYTHYFRSYWGGTQVTVSS-----<br/> qvqlqesgGGLVQPGSLRLSCAAsgftfsNSASVVRQAPGKGLEWSSISGSGNTYSASVVKGRFTISRDNAKNSLYLQMNLSRAEDTAVYYCARD-----wygmdvwggtvtvss</p> <p><b>SARST:</b> aliSize=100 (resi) RMSD=16.79 (Å)<br/> g-----GGLVQAGESLKLSCAA---S---GFMGYRQAPGKQRELVAATNSRRIINADYFKGRFTISRDNAKKTVYLEMNSLEPEDTAVYYCYTHYFRSYWGGTQVTVSS-----<br/> -qvqlqesgGGLVQPGSLRLSCAAsgftfsNSASVVRQAPGKGLEWSSISGSGNTYSASVVKGRFTISRDNAKNSLYLQMNLSRAEDTAVYYCARDwygmdvwggtvtvss</p> <p><b>BLAST:</b> aliSize=77 (resi) iden=66.67% (68/102) simi=75.49% (77/102)<br/> -----G-GGLVQAGESLKLSCAA---S---GFMGYRQAPGKQRELVAATNSRRIINADYFKGRFTISRDNAKKTVYLEMNSLEPEDTAVYYCYTHYFRSYWGGTQVTVSS-----<br/> qvqlqesgGGLVQPGSLRLSCAAsgftfsNSASVVRQAPGKGLEWSSISGSGNTYSASVVKGRFTISRDNAKNSLYLQMNLSRAEDTAVYYCARDwygmdvwggtvtvss</p> <p><b>Proposed:</b> aliSize=99 (resi) RMSD=1.54 (Å)<br/> -----G-GGLVQAGESLKLSCAA---S---GFMGYRQAPGKQRELVAATNSRRIINADYFKGRFTISRDNAKKTVYLEMNSLEPEDTAVYYCYTHYFRSYWGGTQVTVSS-----<br/> qvqlqesgGGLVQPGSLRLSCAAsgftfsNSASVVRQAPGKGLEWSSISGSGNTYSASVVKGRFTISRDNAKNSLYLQMNLSRAEDTAVYYCARDwygmdvwggtvtvss</p>                                                                                                                                                                                                                                                                                                                                                                                                                                                                                                                                                                                   |

|     |                                             |   |       |                                                                                                                                                                                                                                                                                                                                                                                                                                                                                                                                                                                                                                                                                                                                                                                                                                                                                                                                                                                                                                                                                                                                                                                                                                                                                                                                                           |
|-----|---------------------------------------------|---|-------|-----------------------------------------------------------------------------------------------------------------------------------------------------------------------------------------------------------------------------------------------------------------------------------------------------------------------------------------------------------------------------------------------------------------------------------------------------------------------------------------------------------------------------------------------------------------------------------------------------------------------------------------------------------------------------------------------------------------------------------------------------------------------------------------------------------------------------------------------------------------------------------------------------------------------------------------------------------------------------------------------------------------------------------------------------------------------------------------------------------------------------------------------------------------------------------------------------------------------------------------------------------------------------------------------------------------------------------------------------------|
| 441 | <p>lsjvA (102)</p> <hr/> <p>luacH (114)</p> | C | 41.18 | <p><b>TM-align:</b> aliSize=87 (resi) RMSD=1.73 (Å)<br/> -----G-GGLVQAGESLKLSCAA----S--GGFMGYRQAPGKQRELVAITIN-SRRIITNYADFKGRFTISRDNAKKTVYLEMNSLEPEDTAVYYCYTHYFRS ywgqgtqvtvss-----<br/> dvqlqesgPSLVKPSQTLSTTCSVTgdSittSDYWSWIRKFFGNRL EYMGYVSSFFSIFNPSLKSRISTRDTSKNQYLLDLNSVTTEDTATYYCANWD-----gd ywgqgtlvtvsaa</p> <p><b>SARST:</b> aliSize=81 (resi) RMSD=2.43 (Å)<br/> ggg-----LVQAGESLKLSCAASGF----MGVYRQAPGKQRELVAITIN-SRRIITNYADFKGRFTISRDNAKKTVYLEMNSLEPEDTAVYYCY-----thyfrs ywgqgtqvtvss<br/> ---dvqlqesgpsLVKPSQTLSTTCSVTDSittSDYWSWIRKFFGNRL EYMGYVSSFFSIFNPSLKSRISTRDTSKNQYLLDLNSVTTEDTATYYCANWDgd ywgqgtlvtvsaa-----</p> <p><b>BLAST:</b> aliSize=65 (resi) iden=42.16% (43/102) simi=63.73% (65/102)<br/> -----GGGLVQAGESLKLSCAASG----FMGYRQAPGKQRELVAITIN-SRRIITNYADFKGRFTISRDNAKKTVYLEMNSLEPEDTAVYYCYTHYFRS YWGQGTQVTVSS-<br/> dvqlqesGPSLVKPSQTLSTTCSVTDSittSDYWSWIRKFFGNRL EYMGYVSSFFSIFNPSLKSRISTRDTSKNQYLLDLNSVTTEDTATYYC-A NWDGDYWGQGT LVTVSAa</p> <p><b>Proposed:</b> aliSize=99 (resi) RMSD=1.56 (Å)<br/> g-----GGLVQAGESLKLSCAA----S--GGFMGYRQAPGKQRELVAITIN-SRRIITNYADFKGRFTISRDNAKKTVYLEMNSLEPEDTAVYYCYT-hyFRSYWGQGTQVTVSS-<br/> -dvqlqesgPSLVKPSQTLSTTCSVTgdSittSDYWSWIRKFFGNRL EYMGYVSSFFSIFNPSLKSRISTRDTSKNQYLLDLNSVTTEDTATYYCANw--DGDYWGQGT LVTVSAa</p>                                                                     |
| 442 | <p>lsjvA (102)</p> <hr/> <p>lwt5A (115)</p> | C | 38.24 | <p><b>TM-align:</b> aliSize=89 (resi) RMSD=1.73 (Å)<br/> -----GGGLVQAGESLKLSCAA----S--GGFMGYRQAPGKQRELVAITIN-SRRIITNYADFKGRFTISRDNAKKTVYLEMNSLEPEDTAVYYCYTHYFRS ywgqgtqvtvss-----<br/> qvqlvqsGAEVKPPASVVKVSKASgyTftSYWHVVRQAPGQGLEWWMGN YpGSGGNYAEKFNRRVIMTRDTSISTAYMELSR LRSDDTAVYYCARSGGP-----yffdywgqgtlvt</p> <p><b>SARST:</b> aliSize=96 (resi) RMSD=11.88 (Å)<br/> gg-----GLVQAGESLKLSCAASG----GGFMGYRQAPGKQRELVAITIN-SRRIITNYADFKGRFTISRDNAKKTVYLEMNSLEPEDTAVYYCYTH---YFRSYWGQGTQV-tvss<br/> --qvqlvqsGAEVKPPASVVKVSKASgyTftSYWHVVRQAPGQGLEWWMGN YpGSGGNYAEKFNRRVIMTRDTSISTAYMELSR LRSDDTAVYYCARSGgpYFFDYWGQGT LVT---</p> <p><b>BLAST:</b> aliSize=64 (resi) iden=48.04% (49/102) simi=62.75% (64/102)<br/> -----GGGLVQAGESLKLSCAASG----FMGYRQAPGKQRELVAITIN-SRRIITNYADFKGRFTISRDNAKKTVYLEMNSLEPEDTAVYYCYTH---YFRSYWGQGTQVtvss<br/> qvqlvqsGAEVKPPASVVKVSKASgyTftSYWHVVRQAPGQGLEWWMGN YpGSGGNYAEKFNRRVIMTRDTSISTAYMELSR LRSDDTAVYYCARSGgpYFFDYWGQGT LVT---</p> <p><b>Proposed:</b> aliSize=101 (resi) RMSD=1.71 (Å)<br/> -----GGGLVQAGESLKLSCAA----S--GGFMGYRQAPGKQRELVAITIN-SRRIITNYADFKGRFTISRDNAKKTVYLEMNSLEPEDTAVYYCYTHYFRSYWGQGTQVTVSS<br/> qvqlvqsGAEVKPPASVVKVSKASgyTftSYWHVVRQAPGQGLEWWMGN YpGSGGNYAEKFNRRVIMTRDTSISTAYMELSR LRSDDTAVYYCARSGg-PYFFDYWGQGT LVT</p>                                                                         |
| 443 | <p>lsjvA (102)</p> <hr/> <p>lxfpA (131)</p> | C | 61.76 | <p><b>TM-align:</b> aliSize=90 (resi) RMSD=1.69 (Å)<br/> -----G-GGLVQAGESLKLSCAA----S--GGFMGYRQAPGKQRELVAITIN-SRRIITNYADFKGRFTISRDNAKKTVYLEMNSLEPEDTAVYYCYTHYFRS ywgqgtqvtvss-----<br/> vqlqasgGGSVQAGSLRLSCAASgytiGPYCMGWFRQAPGKERE GVAAINSGGISTYADSVKGRFTISRDNAKKTVYLEMNSLEPEDTAVYYCAADSTIY-----asyecghl stgggydswgqgtqvtvs</p> <p><b>SARST:</b> aliSize=99 (resi) RMSD=14.63 (Å)<br/> g-----GGLVQAGESLKLSCAASG----FMGYRQAPGKQRELVAITIN-SRRIITNYADFKGRFTISRDNAKKTVYLEMNSLEPEDTAVYYCYTHYFRS-----YWGQGTQVTV-ss<br/> -vqlqasgGGSVQAGSLRLSCAASgytiGPYCMGWFRQAPGKERE GVAAINSGGISTYADSVKGRFTISRDNAKKTVYLEMNSLEPEDTAVYYCAADSTIYasyecghl stgggydSWGQGTQVTV-ss</p> <p><b>BLAST:</b> aliSize=86 (resi) iden=78.43% (80/102) simi=84.31% (86/102)<br/> -----GGGLVQAGESLKLSCAASG----FMGYRQAPGKQRELVAITIN-SRRIITNYADFKGRFTISRDNAKKTVYLEMNSLEPEDTAVYYCY-----YTHYFR-----SY-----WGQGTQVTV-ss<br/> vqlqasGGSVQAGSLRLSCAASgytiGPYCMGWFRQAPGKERE GVAAINSGGISTYADSVKGRFTISRDNAKKTVYLEMNSLEPEDTAVYYCAADSTIYASYEEcghl stgggydSWGQGTQVTV-ss</p> <p><b>Proposed:</b> aliSize=101 (resi) RMSD=1.45 (Å)<br/> g-----GGLVQAGESLKLSCAA----S--GGFMGYRQAPGKQRELVAITIN-SRRIITNYADFKGRFTISRDNAKKTVYLEMNSLEPEDTAVYYCYTHYF-----RSYWGQGTQVTVSS<br/> -vqlqasgGGSVQAGSLRLSCAASgytiGPYCMGWFRQAPGKERE GVAAINSGGISTYADSVKGRFTISRDNAKKTVYLEMNSLEPEDTAVYYCAADSTIYASYEEcghl stgggydSWGQGTQVTVSS</p> |

|     |                                             |   |       |                                                                                                                                                                                                                                                                                                                                                                                                                                                                                                                                                                                                                                                                                                                                                                                                                                                                                                                                                                                                                                                                                                                                                                                                                                                                                                                                                          |
|-----|---------------------------------------------|---|-------|----------------------------------------------------------------------------------------------------------------------------------------------------------------------------------------------------------------------------------------------------------------------------------------------------------------------------------------------------------------------------------------------------------------------------------------------------------------------------------------------------------------------------------------------------------------------------------------------------------------------------------------------------------------------------------------------------------------------------------------------------------------------------------------------------------------------------------------------------------------------------------------------------------------------------------------------------------------------------------------------------------------------------------------------------------------------------------------------------------------------------------------------------------------------------------------------------------------------------------------------------------------------------------------------------------------------------------------------------------|
| 444 | <p>IsjvA (102)</p> <hr/> <p>IzmyA (132)</p> | C | 69.61 | <p><b>TM-align:</b> aliSize=90 (resi) RMSD=1.90 (Å)<br/> -----GGLVQAGESLKLSCAA-----SGGFMGWYRQAPGKQRELVAITIN-SRGIITNYADFVKGRFTISRDNAKKTVYLEMNSLEPEDTAVYYCYTHYFRS ywgggtqvtvss-----<br/> vqlvesGGGSVQAGSLRLSCTASgytiGPYCMGWFRQAPGGEREAVAAINMGGITTYADSVKGRFTISRDNAKNTVTLQMSLKPEDTAMYCAAADSTIY-----asyyecghglstgggydswgggtqvtvss</p> <p><b>SARST:</b> aliSize=85 (resi) RMSD=4.26 (Å)<br/> g-----GGLVQAGESLKLSCAAS---GTF--MGWYRQAPGKQRELVAITINS-RGITNYADFVKGRFTISRDNAKKTVYLEMNSLEPEDTAVYYCYTH-----yfrsywgggtqvtvss<br/> -vqlvesgGGSVQAGSLRLSCTASgytiGPYCMGWFRQAPGGEREAVAAINMGGITTYADSVKGRFTISRDNAKNTVTLQMSLKPEDTAMYCAAADSTIYASYEecghglstgggydswgggtqvtvss-----</p> <p><b>BLAST:</b> aliSize=85 (resi) iden=76.47% (78/102) simi=83.33% (85/102)<br/> -----GGLVQAGESLKLSCAASC-----GFMGWYRQAPGKQRELVAITINSRGIITNYADFVKGRFTISRDNAKKTVYLEMNSLEPEDTAVYYC-----YTHYFR-----SY----WGGGTQVTVSS<br/> vqlvesGGGSVQAGSLRLSCTASgytiGPYCMGWFRQAPGGEREAVAAINMGGITTYADSVKGRFTISRDNAKNTVTLQMSLKPEDTAMYCAAADSTIYASYEecghglstgggydswgggtqvtvss</p> <p><b>Proposed:</b> aliSize=101 (resi) RMSD=1.43 (Å)<br/> g-----GGLVQAGESLKLSCAA-----SGGFMGWYRQAPGKQRELVAITINSRGIITNYADFVKGRFTISRDNAKKTVYLEMNSLEPEDTAVYYCYTHYF-----RS-YWGGGTQVTVSS<br/> -vqlvesgGGSVQAGSLRLSCTASgytiGPYCMGWFRQAPGGEREAVAAINMGGITTYADSVKGRFTISRDNAKNTVTLQMSLKPEDTAMYCAAADSTIYASYEecghglstgggydswgggtqvtvss</p> |
| 445 | <p>IsjvA (102)</p> <hr/> <p>Izv5A (119)</p> | C | 69.61 | <p><b>TM-align:</b> aliSize=88 (resi) RMSD=1.67 (Å)<br/> -----G-GGLVQAGESLKLSCAA---SG--GFMGWYRQAPGKQRELVAITINSRGIITNY-ADFVKGRFTISRDNAKKTVYLEMNSLEPEDTAVYYCYTHYFRS ywgggtqvtvss-----<br/> vqlvesgGGSVQAGESLRLSCAASgyTYknYCIIGWFRQAPGKDRGAVVFINSDGITYADSVKGRFTISRDNAKNTVYLQMSLKPEDTASYCAAGYR-----nyggcatrywgggtqvtvss</p> <p><b>SARST:</b> aliSize=98 (resi) RMSD=14.69 (Å)<br/> gg-----GGLVQAGESLKLSCAAS---AASGGF--MGWYRQAPGKQRELVAITINSRGIITNY-ADFVKGRFTISRDNAKKTVYLEMNSLEPEDTAVYYCYTHY-----FRSYWGGGTQVTVS--ss<br/> --vqlvesggGGSVQAGESLRLSCAASgyTYknYcIGWFRQAPGKDRGAVVFINSDGITYADSVKGRFTISRDNAKNTVYLQMSLKPEDTASYCAAGYRnyggcATR YWGGGTQVTVS--</p> <p><b>BLAST:</b> aliSize=87 (resi) iden=76.47% (78/102) simi=85.29% (87/102)<br/> -----GGLVQAGESLKLSCAASC-----GFMGWYRQAPGKQRELVAITINSRGIITNYADFVKGRFTISRDNAKKTVYLEMNSLEPEDTAVYYC-----YTHYFR---SYWGGGTQVTVSS<br/> vqlvesGGGSVQAGESLRLSCAASgyTYknYcIGWFRQAPGKDRGAVVFINSDGITYADSVKGRFTISRDNAKNTVYLQMSLKPEDTASYCAAGYRNYGQcatRYWGGGTQVTVS--</p> <p><b>Proposed:</b> aliSize=100 (resi) RMSD=1.54 (Å)<br/> -----G-GGLVQAGESLKLSCAA---SG--GFMGWYRQAPGKQRELVAITINSRGIITNY-ADFVKGRFTISRDNAKKTVYLEMNSLEPEDTAVYYCYTHYF-----RS-YWGGGTQVTVSS<br/> vqlvesgGGSVQAGESLRLSCAASgyTYknYcIGWFRQAPGKDRGAVVFINSDGITYADSVKGRFTISRDNAKNTVYLQMSLKPEDTASYCAAGYRnyggcATR YWGGGTQVTVS--</p>                                        |
| 446 | <p>IsjvA (102)</p> <hr/> <p>IzvhA (124)</p> | C | 64.71 | <p><b>TM-align:</b> aliSize=89 (resi) RMSD=1.45 (Å)<br/> -----G-GGLVQAGESLKLSCAA---S-GGFMGWYRQAPGKQRELVAITINSRGIITNYADFVKGRFTISRDNAKKTVYLEMNSLEPEDTAVYYCYTHYFRS ywgggtqvtvss-----<br/> dvqlvesgGGSVQAGSLRLSCAASgyiAsINYLGWFRQAPGKEREAVAVSPAGGTPYADSVKGRFTVSLDNAENTVYLLQMSLKPEDTALYYCAAARQG-----wyiplnsygn ywgggtqvtvss</p> <p><b>SARST:</b> aliSize=99 (resi) RMSD=14.47 (Å)<br/> g-----GGLVQAGESLKLSCAAS-----GGFMGWYRQAPGKQRELVAITINSRGIITNYADFVKGRFTISRDNAKKTVYLEMNSLEPEDTAVYYCYTHYF-----RSYWGGGTQVTVS--ss<br/> -dvqlvesgGGSVQAGSLRLSCAASgyiAsINYLGWFRQAPGKEREAVAVSPAGGTPYADSVKGRFTVSLDNAENTVYLLQMSLKPEDTALYYCAAARQgwyiplnsygn YWGGGTQVTVS--</p> <p><b>BLAST:</b> aliSize=85 (resi) iden=70.59% (72/102) simi=83.33% (85/102)<br/> -----GGLVQAGESLKLSCAASC-----GFMGWYRQAPGKQRELVAITINSRGIITNYADFVKGRFTISRDNAKKTVYLEMNSLEPEDTAVYYC-----Y---THYFRSYWGGGTQVTVSS<br/> dvqlvesGGGSVQAGSLRLSCAASgyiAsINYLGWFRQAPGKEREAVAVSPAGGTPYADSVKGRFTVSLDNAENTVYLLQMSLKPEDTALYYCAAARQgwyiplnsygn YWGGGTQVTVS--</p> <p><b>Proposed:</b> aliSize=100 (resi) RMSD=1.22 (Å)<br/> g-----GGLVQAGESLKLSCAA---S-GGFMGWYRQAPGKQRELVAITINSRGIITNYADFVKGRFTISRDNAKKTVYLEMNSLEPEDTAVYYCYTHYF-----RS-YWGGGTQVTVSS<br/> -dvqlvesgGGSVQAGSLRLSCAASgyiAsINYLGWFRQAPGKEREAVAVSPAGGTPYADSVKGRFTVSLDNAENTVYLLQMSLKPEDTALYYCAAARQgwyiplnsygn YWGGGTQVTVS--</p>                              |

|     |                                             |   |       |                                                                                                                                                                                                                                                                                                                                                                                                                                                                                                                                                                                                                                                                                                                                                                                                                                                                                                                                                                                                                                                                                                                                                                                                                                                                                                                                              |
|-----|---------------------------------------------|---|-------|----------------------------------------------------------------------------------------------------------------------------------------------------------------------------------------------------------------------------------------------------------------------------------------------------------------------------------------------------------------------------------------------------------------------------------------------------------------------------------------------------------------------------------------------------------------------------------------------------------------------------------------------------------------------------------------------------------------------------------------------------------------------------------------------------------------------------------------------------------------------------------------------------------------------------------------------------------------------------------------------------------------------------------------------------------------------------------------------------------------------------------------------------------------------------------------------------------------------------------------------------------------------------------------------------------------------------------------------|
| 447 | <p>1sjvA (102)</p> <hr/> <p>1zvyA (125)</p> | C | 52.94 | <p><b>TM-align:</b> aliSize=89 (resi) RMSD=1.45 (Å)<br/> -----G-GGLVQAGEESLKLSCAA-----GGFNGWYRQAPGKQRELVAITIN-SRGIITNADFVKGRFTISRDNAKKTVYLEMNSLEPEDTAVVYCYTHYFRSsywgggtqvtvss-----<br/> dvqlvesgGGSVOAGGSLRLSCAASgsstdsIEYNTWFRQAPGKAREGVAALYtHTGNTYITDSVKGRFTISQKAKNMAYLRMDSVKS EDTAIYTCGATRKYVpvrfaIdqssydywgggtqvtv</p> <p><b>SARST:</b> aliSize=98 (resi) RMSD=12.78 (Å)<br/> g-----GGLVQAGEESLKLSCAAS-----GGFNGWYRQAPGKQRELVAITINSRGIITNADFVKGRFTISRDNAKKTVYLEMNSLEPEDTAVVYCYTHYFRS-----YWGQGTQVTI--vss<br/> -vqlvesgGGSVOAGGSLRLSCAASgsstdsIEYNTWFRQAPGKAREGVAALYTHtGNTYITDSVKGRFTISQKAKNMAYLRMDSVKS EDTAIYTCGATRKYVpvrfaIdqssydywgggtqvtv---</p> <p><b>BLAST:</b> aliSize=76 (resi) iden=63.73% (65/102) simi=74.51% (76/102)<br/> -----GGGLVQAGEESLKLSCAASG-----FMGWYRQAPGKQRELVAITINSRGIITNADFVKGRFTISRDNAKKTVYLEMNSLEPEDTAVVYCYTHYFRS---R-----SYWGQGTQVTI--ss<br/> vqlvesGGSVOAGGSLRLSCAASGstsdieYNTWFRQAPGKAREGVAALYTHtGNTYITDSVKGRFTISQKAKNMAYLRMDSVKS EDTAIYTCGATRKYVpvrfaIdqssydywgggtqvtv---</p> <p><b>Proposed:</b> aliSize=100 (resi) RMSD=1.41 (Å)<br/> g-----GGLVQAGEESLKLSCAA-----GGFNGWYRQAPGKQRELVAITIN-SRGIITNADFVKGRFTISRDNAKKTVYLEMNSLEPEDTAVVYCYTHYFRS-----YWGQGTQVTI--SS<br/> -dvqlvesgGGSVOAGGSLRLSCAASgsstdsIEYNTWFRQAPGKAREGVAALYtHTGNTYITDSVKGRFTISQKAKNMAYLRMDSVKS EDTAIYTCGATR-KYvprfaIdqssyDYWGQGTQVTI</p> |
| 448 | <p>1sjvA (102)</p> <hr/> <p>2bseD (122)</p> | C | 64.71 | <p><b>TM-align:</b> aliSize=88 (resi) RMSD=1.66 (Å)<br/> -----GGGLVQAGEESLKLSCAA---S---GFMGWYRQAPGKQRELVAITIN-SRGIITNADFVKGRFTISRDNAKKTVYLEMNSLEPEDTAVVYCYTHYFRSsywgggtqvtvss-----<br/> vqlqesGGGLVQAGGSLRLSCTASrRtgsnWCMGWFRQLAGKEPELVVALNfdYDMTYADSVKGRFTVSRD SGKNTVYLQMSLKPEDTAIYYCAARSG-----gfssnrelydgwgggtqvtvss</p> <p><b>SARST:</b> aliSize=99 (resi) RMSD=14.67 (Å)<br/> g-----GGLVQAGEESLKLSCAASG-----GFMGWYRQAPGKQRELVAITIN-SRGIITNADFVKGRFTISRDNAKKTVYLEMNSLEPEDTAVVYCYTHYFRS-----YWGQGTQVTI--ss<br/> -vqlqesgGGLVQAGGSLRLSCTASrRtgsnWCMGWFRQLAGKEPELVVALNfdYDMTYADSVKGRFTVSRD SGKNTVYLQMSLKPEDTAIYYCAARSGGfssnrelydGWGQGTQVTI--ss--</p> <p><b>BLAST:</b> aliSize=81 (resi) iden=69.61% (71/102) simi=79.41% (81/102)<br/> -----GGGLVQAGEESLKLSCAAS---G---FMGWYRQAPGKQRELVAITIN-SRGIITNADFVKGRFTISRDNAKKTVYLEMNSLEPEDTAVVYCYTHYFRS---Y---WGQGTQVTI--SS<br/> vqlqesGGGLVQAGGSLRLSCTASrrtgsnWCMGWFRQLAGKEPELVVALNfdYDMTYADSVKGRFTVSRD SGKNTVYLQMSLKPEDTAIYYCAARSGGfssnrelydGWGQGTQVTI--SS</p> <p><b>Proposed:</b> aliSize=101 (resi) RMSD=1.47 (Å)<br/> g-----GGLVQAGEESLKLSCAA---S---GFMGWYRQAPGKQRELVAITIN-SRGIITNADFVKGRFTISRDNAKKTVYLEMNSLEPEDTAVVYCYTHYFRS-----RS-YWGQGTQVTI--SS<br/> -vqlqesgGGLVQAGGSLRLSCTASrRtgsnWCMGWFRQLAGKEPELVVALNfdYDMTYADSVKGRFTVSRD SGKNTVYLQMSLKPEDTAIYYCAARSGGfssnreLYdGWGQGTQVTI--SS</p>        |
| 449 | <p>1sjvA (102)</p> <hr/> <p>2dqhH (114)</p> | C | 39.22 | <p><b>TM-align:</b> aliSize=88 (resi) RMSD=1.99 (Å)<br/> -----G-GGLVQAGESLKLSCAA-----S---GGFMGWYRQAPGKQRELVAITINSRGIITNADFVKGRFTISRDNAKKTVYLEMNSLEPEDTAVVYCYTHYFRSsywgggtqvtvss-----<br/> dvqlqesgPSSLVKPQSQTLSITCSVTgdsitSDfWSWIRKFFGNRLIYMGYVYSYSSTIYNPSLKSRIISITRDTSKNQYLDLNSVTTEDTATYYCANWDG-----dywgggtlvtvsaa</p> <p><b>SARST:</b> aliSize=93 (resi) RMSD=16.19 (Å)<br/> ggg-----LVQAGESLKLSCAASG---GF---MGWYRQAPGKQRELVAITINSRGIITNADFVKGRFTISRDNAKKTVYLEMNSLEPEDTAVVYCYTHYFRS-----YWGQGTQVTI--ss<br/> ---dvqlqesgpsLVKPSQTLSTITCSVTGDSitdfWSWIRKFFGNRLIYMGYVYSYSSTIYNPSLKSRIISITRDTSKNQYLDLNSVTTEDTATY-----YCANwdgdYWGQGTQVTI--ssaa-</p> <p><b>BLAST:</b> aliSize=64 (resi) iden=42.16% (43/102) simi=62.75% (64/102)<br/> -----GGGLVQAGESLKLSCAASG-----FMGWYRQAPGKQRELVAITINSRGIITNADFVKGRFTISRDNAKKTVYLEMNSLEPEDTAVVYCYTHYFRSYWGQGTQVTI--SS<br/> dvqlqesgPSSLVKPQSQTLSITCSVTGDSitdfWSWIRKFFGNRLIYMGYVYSYSSTIYNPSLKSRIISITRDTSKNQYLDLNSVTTEDTATYYCANWDGDYWGQGTQVTI--SSAa</p> <p><b>Proposed:</b> aliSize=99 (resi) RMSD=1.60 (Å)<br/> -----GGGLVQAGESLKLSCAA---S---GGFMGWYRQAPGKQRELVAITINSRGIITNADFVKGRFTISRDNAKKTVYLEMNSLEPEDTAVVYCYTHYFRSYWGQGTQVTI--SS<br/> dvqlqesgPSSLVKPQSQTLSITCSVTgdsitSDfWSWIRKFFGNRLIYMGYVYSYSSTIYNPSLKSRIISITRDTSKNQYLDLNSVTTEDTATYYCANW-DGDYWGQGTQVTI--SSAa</p>                                        |

|     |                                                     |   |       |                                                                                                                                                                                                                                                                                                                                                                                                                                                                                                                                                                                                                                                                                                                                                                                                                                                                                                                                                                                                                                                                                                                                                                                                                                                             |
|-----|-----------------------------------------------------|---|-------|-------------------------------------------------------------------------------------------------------------------------------------------------------------------------------------------------------------------------------------------------------------------------------------------------------------------------------------------------------------------------------------------------------------------------------------------------------------------------------------------------------------------------------------------------------------------------------------------------------------------------------------------------------------------------------------------------------------------------------------------------------------------------------------------------------------------------------------------------------------------------------------------------------------------------------------------------------------------------------------------------------------------------------------------------------------------------------------------------------------------------------------------------------------------------------------------------------------------------------------------------------------|
| 450 | <p>1sjvA<br/>(102)</p> <hr/> <p>2dqdH<br/>(114)</p> | C | 40.20 | <p><b>TM-align:</b> aliSize=88 (resi) RMSD=1.99 (Å)<br/> -----G-GGLVQAGESKLSIAA---S--GGFMGYRQAFGKQRELVAITNSRITINADLVKGRFTSRDPAKKTIVLEMNPLEPDTAVVYCYTHYFRsywgqgtqvtvss-----<br/> dvqlqesgPSLVKPSQTLSTTCSVTgdSittSDYWSWIRKFFGNRLIYMGFVYSYSTYNNPSLKSRISTRDTSKNQYLDLNSVTTEDTATYYCANWDG-----dywgqgtlvtvsaa</p> <p><b>SARST:</b> aliSize=93 (resi) RMSD=16.17 (Å)<br/> ggg-----LVQAGESKLSIAASGF----MGVYRQAFGKQRELVAITNSRITINADLVKGRFTSRDPAKKTIVLEMNPLEPDTAVVYCYTHYFRS----YWGQGTQVTVS--s<br/> ---dvqlqesgpsLVKPSQTLSTTCSVTDSittSDYWSWIRKFFGNRLIYMGFVYSYSTYNNPSLKSRISTRDTSKNQYLDLNSVTTEDTATY-----YCANwdgdYWGQGTQVTVSaa-</p> <p><b>BLAST:</b> aliSize=64 (resi) iden=41.18% (42/102) simi=62.75% (64/102)<br/> -----GGLVQAGESKLSIAASG----FMGYRQAFGKQRELVAITNSRITINADLVKGRFTSRDPAKKTIVLEMNPLEPDTAVVYCYTHYFRSYWGQGTQVTVSS-<br/> dvqlqesGPSLVKPSQTLSTTCSVTDSittSDYWSWIRKFFGNRLIYMGFVYSYSTYNNPSLKSRISTRDTSKNQYLDLNSVTTEDTATYYCANWDG--YWGQGTQVTVSAA</p> <p><b>Proposed:</b> aliSize=99 (resi) RMSD=1.56 (Å)<br/> g-----GGLVQAGESKLSIAA---S--GGFMGYRQAFGKQRELVAITNSRITINADLVKGRFTSRDPAKKTIVLEMNPLEPDTAVVYCYT-hyFRSYWGQGTQVTVSS-<br/> -dvqlqesgPSLVKPSQTLSTTCSVTgdSittSDYWSWIRKFFGNRLIYMGFVYSYSTYNNPSLKSRISTRDTSKNQYLDLNSVTTEDTATYYCANw--DGDYWGQGTQVTVSAA</p>               |
| 451 | <p>1sjvA<br/>(102)</p> <hr/> <p>2dqeH<br/>(114)</p> | C | 38.24 | <p><b>TM-align:</b> aliSize=88 (resi) RMSD=1.99 (Å)<br/> -----G-GGLVQAGESKLSIAA---S--GGFMGYRQAFGKQRELVAITNSRITINADLVKGRFTSRDPAKKTIVLEMNPLEPDTAVVYCYTHYFRsywgqgtqvtvss-----<br/> dvqlqesgPSLVKPSQTLSTTCSVTgdSittSDYWSWIRKFFGNRLIYMGVVSASSTYNNPSLKSRISTRDTSKNQYLDLNSVTTEDTATYYCANWDG-----dywgqgtlvtvsaa</p> <p><b>SARST:</b> aliSize=93 (resi) RMSD=16.17 (Å)<br/> ggg-----LVQAGESKLSIAASGF----MGVYRQAFGKQRELVAITNSRITINADLVKGRFTSRDPAKKTIVLEMNPLEPDTAVVYCYTHYFRS----YWGQGTQVTVS--s<br/> ---dvqlqesgpsLVKPSQTLSTTCSVTDSittSDYWSWIRKFFGNRLIYMGVVSASSTYNNPSLKSRISTRDTSKNQYLDLNSVTTEDTATY-----YCANwdgdYWGQGTQVTVSaa-</p> <p><b>BLAST:</b> aliSize=65 (resi) iden=41.18% (42/102) simi=63.73% (65/102)<br/> -----GGLVQAGESKLSIAASG----FMGYRQAFGKQRELVAITNSRITINADLVKGRFTSRDPAKKTIVLEMNPLEPDTAVVYCYTHYFRSYWGQGTQVTVSS-<br/> dvqlqesGPSLVKPSQTLSTTCSVTDSittSDYWSWIRKFFGNRLIYMGVVSASSTYNNPSLKSRISTRDTSKNQYLDLNSVTTEDTATYYCANWDG--YWGQGTQVTVSAA</p> <p><b>Proposed:</b> aliSize=99 (resi) RMSD=1.61 (Å)<br/> -----GGLVQaGESKLSIAA---S--GGFMGYRQAFGKQRELVAITNSRITINADLVKGRFTSRDPAKKTIVLEMNPLEPDTAVVYCYT-hyFRSYWGQGTQVTVSS-<br/> dvqlqesgPSLVKPSQTLSTTCSVTgdSittSDYWSWIRKFFGNRLIYMGVVSASSTYNNPSLKSRISTRDTSKNQYLDLNSVTTEDTATYYCANw--DGDYWGQGTQVTVSAA</p>                 |
| 452 | <p>1sjvA<br/>(102)</p> <hr/> <p>2dqfB<br/>(114)</p> | C | 40.20 | <p><b>TM-align:</b> aliSize=88 (resi) RMSD=1.99 (Å)<br/> -----G-GGLVQAGESKLSIAA---S--GGFMGYRQAFGKQRELVAITNSRITINADLVKGRFTSRDPAKKTIVLEMNPLEPDTAVVYCYT-HYFRsywgqgtqvtvss-----<br/> dvqlqesgPSLVKPSQTLSTTCSVTgdSittSDAWSWIRKFFGNRLIYMGVVSASSTYNNPSLKSRISTRDTSKNQYLDLNSVTTEDTATYYCANwDGD-----ywqgtlvtvsaa</p> <p><b>SARST:</b> aliSize=71 (resi) RMSD=16.72 (Å)<br/> ggg-----LVQAGESKLSIAASGF----GFMGYRQAFGKQRELVAITNS-----RGitnyadvkgrftisrdnakkTVLEMNPLEPDTAVVYCYthyFRS----YWGQGTQVTV---ss<br/> ---dvqlqesgpsLVKPSQTLSTTCSVTDSittSDAWSWIRKFFGNRLIYMGVVSASgstynpslksrisitrdtsKN-----QYLDLNSVTTEDTATY-----CANwdgdYWGQGTQVTVSaa--</p> <p><b>BLAST:</b> aliSize=65 (resi) iden=41.18% (42/102) simi=63.73% (65/102)<br/> -----GGLVQAGESKLSIAASGFM----GMYRQAFGKQRELVAITNSRITINADLVKGRFTSRDPAKKTIVLEMNPLEPDTAVVYCYTHYFRSYWGQGTQVTVSS-<br/> dvqlqesGPSLVKPSQTLSTTCSVTDSittSDAWSWIRKFFGNRLIYMGVVSASSTYNNPSLKSRISTRDTSKNQYLDLNSVTTEDTATYYCANWDG--YWGQGTQVTVSAA</p> <p><b>Proposed:</b> aliSize=99 (resi) RMSD=1.56 (Å)<br/> g-----GGLVQAGESKLSIAA---S--GGFMGYRQAFGKQRELVAITNSRITINADLVKGRFTSRDPAKKTIVLEMNPLEPDTAVVYCYT-hyFRSYWGQGTQVTVSS-<br/> -dvqlqesgPSLVKPSQTLSTTCSVTgdSittSDAWSWIRKFFGNRLIYMGVVSASSTYNNPSLKSRISTRDTSKNQYLDLNSVTTEDTATYYCANw--DGDYWGQGTQVTVSAA</p> |

|     |                                             |   |       |                                                                                                                                                                                                                                                                                                                                                                                                                                                                                                                                                                                                                                                                                                                                                                                                                                                                                                                                                                                                                                                                                                                                                                                                                                                           |
|-----|---------------------------------------------|---|-------|-----------------------------------------------------------------------------------------------------------------------------------------------------------------------------------------------------------------------------------------------------------------------------------------------------------------------------------------------------------------------------------------------------------------------------------------------------------------------------------------------------------------------------------------------------------------------------------------------------------------------------------------------------------------------------------------------------------------------------------------------------------------------------------------------------------------------------------------------------------------------------------------------------------------------------------------------------------------------------------------------------------------------------------------------------------------------------------------------------------------------------------------------------------------------------------------------------------------------------------------------------------|
| 453 | <p>1sjvA (102)</p> <hr/> <p>2dqgH (114)</p> | C | 41.18 | <p><b>TM-align:</b> aliSize=88 (resi) RMSD=1.99 (Å)<br/> -----G-GGLVQAGESLKLSCAA---S--GGFMGYRQAFPGKQRELVAITNSRITINADLVKGRFTSRDPAKKTIVLEMNLSLEPEDTAVVYCYTHYFRsywgggtqvtvss-----<br/> dvqlqesgPslVKPSQTLSTTCsvTgdSItSDYWSWIRKFFGNRLIYMGYVSFSSTYINPSLKSRISTRDTSKNQYLDLNSVTTEDTATYYCANWGDG-----dywgggtlvtvsaa</p> <p><b>SARST:</b> aliSize=93 (resi) RMSD=16.20 (Å)<br/> ggg-----LVQAGESLKLSCAASGF----MGVYRQAFPGKQRELVAITNSRITINADLVKGRFTSRDPAKKTIVLEMNLSLEPEDTAVVYcythyFRS----YWGQGIQVTVS--s<br/> ---dvqlqesgpsLVKPSQTLSTTCsvTDSItSDYWSWIRKFFGNRLIYMGYVSFSSTYINPSLKSRISTRDTSKNQYLDLNSVTTEDTATYY-----CANWdgdYWGQGITVTVSaa-</p> <p><b>BLAST:</b> aliSize=64 (resi) iden=41.18% (42/102) simi=62.75% (64/102)<br/> -----GGLVQAGESLKLSCAASG----FMGYRQAFPGKQRELVAITNSRITINADLVKGRFTSRDPAKKTIVLEMNLSLEPEDTAVVYCYTHYFRSYWGQGIQVTVSS-<br/> dvqlqesgPslVKPSQTLSTTCsvTDSItSDYWSWIRKFFGNRLIYMGYVSFSSTYINPSLKSRISTRDTSKNQYLDLNSVTTEDTATYYC-ANWGDGYWGQGITVTVSAA</p> <p><b>Proposed:</b> aliSize=100 (resi) RMSD=1.69 (Å)<br/> -----GGLVQAGESLKLSCAA---S--GGFMGYRQAFPGKQRELVAITNSRITINADLVKGRFTSRDPAKKTIVLEMNLSLEPEDTAVVYCYT-hyFRSYWGQGIQVTVSS-<br/> dvqlqesgPslVKPSQTLSTTCsvTgdSItSDYWSWIRKFFGNRLIYMGYVSFSSTYINPSLKSRISTRDTSKNQYLDLNSVTTEDTATYYCANw--DGDYWGQGITVTVSaa</p> |
| 454 | <p>1sjvA (102)</p> <hr/> <p>2dqhH (114)</p> | C | 38.24 | <p><b>TM-align:</b> aliSize=88 (resi) RMSD=2.02 (Å)<br/> -----G-GGLVQAGESLKLSCAA---S--GGFMGYRQAFPGKQRELVAITNSRITINADLVKGRFTSRDPAKKTIVLEMNLSLEPEDTAVVYCYT-HYFRsywgggtqvtvss-----<br/> dvqlqesgPslVKPSQTLSTTCsvTgdSItSDYWSWIRKFFGNRLIYMGYVSYSSTAINPSLKSRISTRDTSKNQYLDLNSVTTEDTATYYCANwDGD-----ywgggtlvtvsaa</p> <p><b>SARST:</b> aliSize=93 (resi) RMSD=16.17 (Å)<br/> ggg-----LVQAGESLKLSCAASGF----MGVYRQAFPGKQRELVAITNSRITINADLVKGRFTSRDPAKKTIVLEMNLSLEPEDTAVVYcythyFRS----YWGQGIQVTVS--s<br/> ---dvqlqesgpsLVKPSQTLSTTCsvTDSItSDYWSWIRKFFGNRLIYMGYVSYSSTAINPSLKSRISTRDTSKNQYLDLNSVTTEDTATYY-----CANWdgdYWGQGITVTVSaa-</p> <p><b>BLAST:</b> aliSize=64 (resi) iden=41.18% (42/102) simi=62.75% (64/102)<br/> -----GGLVQAGESLKLSCAASG----FMGYRQAFPGKQRELVAITNSRITINADLVKGRFTSRDPAKKTIVLEMNLSLEPEDTAVVYCYTHYFRSYWGQGIQVTVSS-<br/> dvqlqesgPslVKPSQTLSTTCsvTDSItSDYWSWIRKFFGNRLIYMGYVSYSSTAINPSLKSRISTRDTSKNQYLDLNSVTTEDTATYYC-ANWGDGYWGQGITVTVSAA</p> <p><b>Proposed:</b> aliSize=99 (resi) RMSD=1.62 (Å)<br/> -----GGLVQaGESLKLSCAA---S--GGFMGYRQAFPGKQRELVAITNSRITINADLVKGRFTSRDPAKKTIVLEMNLSLEPEDTAVVYCYT-hyFRSYWGQGIQVTVSS-<br/> dvqlqesgPslVKP-SQTLSTTCsvTgdSItSDYWSWIRKFFGNRLIYMGYVSYSSTAINPSLKSRISTRDTSKNQYLDLNSVTTEDTATYYCANw-DGDYWGQGITVTVSAA</p>  |
| 455 | <p>1sjvA (102)</p> <hr/> <p>2dqjH (114)</p> | C | 38.24 | <p><b>TM-align:</b> aliSize=88 (resi) RMSD=1.98 (Å)<br/> -----G-GGLVQAGESLKLSCAA---S--GGFMGYRQAFPGKQRELVAITNSRITINADLVKGRFTSRDPAKKTIVLEMNLSLEPEDTAVVYCYTHYFRsywgggtqvtvss-----<br/> dvqlqesgPslVKPSQTLSTTCsvTgdSItSDYWSWIRKFFGNRLIYMGYVSYSSTYINPSLKSRISTRDTSKNQYLDLNSVTTEDTATYYCANWGDG-----dywgggtlvtvsaa</p> <p><b>SARST:</b> aliSize=93 (resi) RMSD=16.18 (Å)<br/> ggg-----LVQAGESLKLSCAASGF----MGVYRQAFPGKQRELVAITNSRITINADLVKGRFTSRDPAKKTIVLEMNLSLEPEDTAVYcythyFRS----YWGQGIQVTVS--s<br/> ---dvqlqesgpsLVKPSQTLSTTCsvTDSItSDYWSWIRKFFGNRLIYMGYVSYSSTYINPSLKSRISTRDTSKNQYLDLNSVTTEDTATYY-----YCANWdgdYWGQGITVTVSaa-</p> <p><b>BLAST:</b> aliSize=64 (resi) iden=41.18% (42/102) simi=62.75% (64/102)<br/> -----GGLVQAGESLKLSCAASG----FMGYRQAFPGKQRELVAITNSRITINADLVKGRFTSRDPAKKTIVLEMNLSLEPEDTAVVYCYTHYFRSYWGQGIQVTVSS-<br/> dvqlqesgPslVKPSQTLSTTCsvTDSItSDYWSWIRKFFGNRLIYMGYVSYSSTYINPSLKSRISTRDTSKNQYLDLNSVTTEDTATYYC-ANWGDGYWGQGITVTVSAA</p> <p><b>Proposed:</b> aliSize=99 (resi) RMSD=1.60 (Å)<br/> -----GGLVQaGESLKLSCAA---S--GGFMGYRQAFPGKQRELVAITNSRITINADLVKGRFTSRDPAKKTIVLEMNLSLEPEDTAVVYCYT-hyFRSYWGQGIQVTVSS-<br/> dvqlqesgPslVKP-SQTLSTTCsvTgdSItSDYWSWIRKFFGNRLIYMGYVSYSSTYINPSLKSRISTRDTSKNQYLDLNSVTTEDTATYYCANw-DGDYWGQGITVTVSAA</p>  |



|     |                                             |   |       |                                                                                                                                                                                                                                                                                                                                                                                                                                                                                                                                                                                                                                                                                                                                                                                                                                                                                                                                                                                                                                                                                                                                                                                                                                                                                                                                                                                                                                             |
|-----|---------------------------------------------|---|-------|---------------------------------------------------------------------------------------------------------------------------------------------------------------------------------------------------------------------------------------------------------------------------------------------------------------------------------------------------------------------------------------------------------------------------------------------------------------------------------------------------------------------------------------------------------------------------------------------------------------------------------------------------------------------------------------------------------------------------------------------------------------------------------------------------------------------------------------------------------------------------------------------------------------------------------------------------------------------------------------------------------------------------------------------------------------------------------------------------------------------------------------------------------------------------------------------------------------------------------------------------------------------------------------------------------------------------------------------------------------------------------------------------------------------------------------------|
| 456 | <p>lsjvA (102)</p> <hr/> <p>2yssB (113)</p> | C | 41.18 | <p><b>TM-align:</b> aliSize=88 (resi) RMSD=1.98 (Å)<br/> -----G-GGLVQAGESLKLSCAA-----SGGFMGYRQAPGKQRELVAITNSRITINADFKGRFTISRDNAKKTVYLEMNSLEPEDTAVYYCYTHYFRsywggtqvtvss-----<br/> qvqlqeSgPGLMKPSETLSITCSVsgdsiRSDYWSIRKPKGLEIYGYVSYSTYNNPSLKSRTLSVDTSKNRFSLKLSVTAADTAVYYCARWDG-----dywgqgilvtvss</p> <p><b>SARST:</b> aliSize=93 (resi) RMSD=16.18 (Å)<br/> ggg-----LVQAGESLKLSCAA-----AASG---GFMGYRQAPGKQRELVAITNSRITINADFKGRFTISRDNAKKTVYLEMNSLEPEDTAVYYCYTHYFRS----YWGQGTQVTVSS-s<br/> ---qvqlqesgpgLMPSETLSITCSVsgdsiRSDYWSIRKPKGLEIYGYVSYSTYNNPSLKSRTLSVDTSKNRFSLKLSVTAADTAVYY-----YCARwdgdYWGQILVTVSS-</p> <p><b>BLAST:</b> aliSize=61 (resi) iden=44.12% (45/102) simi=59.80% (61/102)<br/> -----GGLVQAGESLKLSCAA-----FMGYRQAPGKQRELVAITNSRITINADFKGRFTISRDNAKKTVYLEMNSLEPEDTAVYYCYTHYFRSYWGQGTQVTVSS<br/> qvqlqesGGLVQAGESLKLSCAA-----FMGYRQAPGKQRELVAITNSRITINADFKGRFTISRDNAKKTVYLEMNSLEPEDTAVYYCYTHYFRSYWGQGTQVTVSS</p> <p><b>Proposed:</b> aliSize=100 (resi) RMSD=1.71 (Å)<br/> -----G-GGLVQAGESLKLSCAA-----SGGFMGYRQAPGKQRELVAITNSRITINADFKGRFTISRDNAKKTVYLEMNSLEPEDTAVYYCYT-hyFRSYWGQGTQVTVSS<br/> qvqlqeSgPGLMKPSETLSITCSVsgdsiRSDYWSIRKPKGLEIYGYVSYSTYNNPSLKSRTLSVDTSKNRFSLKLSVTAADTAVYYCARw--DGDYWGQILVTVSS</p>                                                                                                                                                                                                            |
| 457 | <p>lsjvA (102)</p> <hr/> <p>3cx5J (127)</p> | C | 45.10 | <p><b>TM-align:</b> aliSize=90 (resi) RMSD=2.02 (Å)<br/> -----G-GGLVQAGESLKLSCAA-----SGGFMGYRQAPGKQRELVAITNSRITINADFKGRFTISRDNAKKTVYLEMNSLEPEDTAVYYCYTHYFRSYwggtqvtvss-----<br/> evklqeSgAGLVQPSQSLSTCSVtgysitSGYYWNWIRLFPGNKLEWGYISNVGDNNYNSPKDRLSITRDTSKNQFFLKLNSVTTEDTATYYCARSEYY-----vtgyamywggttvtvssawrhp</p> <p><b>SARST:</b> aliSize=86 (resi) RMSD=2.00 (Å)<br/> ggg-----LVQAGESLKLSCAA-----ASGFMGYRQAPGKQRELVAITNSRITINADFKGRFTISRDNAKKTVYLEMNSLEPEDTAVYYCYTHYFR-----sywggtqvtvss<br/> ---evklqesgagLVQPSQSLSTCSVtgysitSGYYWNWIRLFPGNKLEWGYISNVGDNNYNSPKDRLSITRDTSKNQFFLKLNSVTTEDTATYYCARSEYYsvtgyamywggttvtvssawrhp-----</p> <p><b>BLAST:</b> aliSize=67 (resi) iden=50.00% (51/102) simi=65.69% (67/102)<br/> -----GGLVQAGESLKLSCAA-----GFMGYRQAPGKQRELVAITNSRITINADFKGRFTISRDNAKKTVYLEMNSLEPEDTAVYYCY-----Y--THYFRSYWGQGTQVTVSS<br/> evklqesGAGLVQPSQSLSTCSVtgysitSGYYWNWIRLFPGNKLEWGYISNVGDNNYNSPKDRLSITRDTSKNQFFLKLNSVTTEDTATYYCARseyYsvtgyamywggttvtvssawrhp</p> <p><b>Proposed:</b> aliSize=101 (resi) RMSD=1.61 (Å)<br/> g-----GGLVQAGESLKLSCAA-----SGGFMGYRQAPGKQRELVAITNSRITINADFKGRFTISRDNAKKTVYLEMNSLEPEDTAVYYCYT----HYF-RSY-WGQGTQVTVSS<br/> -evklqesgAGLVQPSQSLSTCSVtgysitSGYYWNWIRLFPGNKLEWGYISNVGDNNYNSPKDRLSITRDTSKNQFFLKLNSVTTEDTATYYCARseyYsvtgyamywggttvtvssawrhp</p>                                                                                                                                         |
| 458 | <p>lsndA (129)</p> <hr/> <p>lnsnS (138)</p> | C | 99.22 | <p><b>TM-align:</b> aliSize=111 (resi) RMSD=1.66 (Å)<br/> ---HKEPATL IKAIDGDTVKLMYKGQPMFRLLVDTPETKHPKKGVEKYGPEASAFKKMVENAKKIEVEFDKGQRTDKYGRGLAYIADGKMVNEALVROGLAKVAYTH-----EQhlrkseaqakkeklniws-----<br/> tkkHKEPATL IKAIDGDTVKLMYKGQPMFRLLVDTPETKHPKKGVEKYGPEASAFKKMVENAKKIEVEFDKGQRTDKYGRGLAYIADGKMVNEALVROGLAKVAYVYkpnntHEQhlrkseaqakkeklniws-----</p> <p><b>SARST:</b> aliSize=126 (resi) RMSD=9.35 (Å)<br/> l----HKEPATL IKAIDGDTVKLMYKGQPMFRLLVDTPETKHPKKGVEKYGPEASAFKKMVENAKKIEVEFDKGQRTDKYGRGLAYIADGKMVNEALVROGLAKVAYT-----HEQHLRKSEAQAKKEKLNl--ws<br/> -tkklHKEPATL IKAIDGDTVKLMYKGQPMFRLLVDTPETKHPKKGVEKYGPEASAFKKMVENAKKIEVEFDKGQRTDKYGRGLAYIADGKMVNEALVROGLAKVAYVYkpnntHEQHLRKSEAQAKKEKLNlws--</p> <p><b>BLAST:</b> aliSize=129 (resi) iden=100.00% (129/129) simi=100.00% (129/129)<br/> ---HKEPATL IKAIDGDTVKLMYKGQPMFRLLVDTPETKHPKKGVEKYGPEASAFKKMVENAKKIEVEFDKGQRTDKYGRGLAYIADGKMVNEALVROGLAKVAY-----THEQHLRKSEAQAKKEKLNlWS<br/> tkkHKEPATL IKAIDGDTVKLMYKGQPMFRLLVDTPETKHPKKGVEKYGPEASAFKKMVENAKKIEVEFDKGQRTDKYGRGLAYIADGKMVNEALVROGLAKVAYVYkpnntHEQHLRKSEAQAKKEKLNlWS</p> <p><b>Proposed:</b> aliSize=129 (resi) RMSD=1.07 (Å)<br/> ---HKEPATL IKAIDGDTVKLMYKGQPMFRLLVDTPETKHPKKGVEKYGPEASAFKKMVENAKKIEVEFDKGQRTDKYGRGLAYIADGKMVNEALVROGLAKVAYT-----HEQHLRKSEAQAKKEKLNlWS<br/> tkkHKEPATL IKAIDGDTVKLMYKGQPMFRLLVDTPETKHPKKGVEKYGPEASAFKKMVENAKKIEVEFDKGQRTDKYGRGLAYIADGKMVNEALVROGLAKVAYVYkpnntHEQHLRKSEAQAKKEKLNlWS</p> |

|     |                                                           |   |       |                                                                                                                                                                                                                                                                                                                                                                                                                                                                                                                                                                                                                                                                                                                                                                                                                                                                                                                                                                                                                                                                                                                                                                                                                                                                                                                                                                                                                                                                                                                                                                                                                                                                                                                                                                                                                                                                                                                                                      |
|-----|-----------------------------------------------------------|---|-------|------------------------------------------------------------------------------------------------------------------------------------------------------------------------------------------------------------------------------------------------------------------------------------------------------------------------------------------------------------------------------------------------------------------------------------------------------------------------------------------------------------------------------------------------------------------------------------------------------------------------------------------------------------------------------------------------------------------------------------------------------------------------------------------------------------------------------------------------------------------------------------------------------------------------------------------------------------------------------------------------------------------------------------------------------------------------------------------------------------------------------------------------------------------------------------------------------------------------------------------------------------------------------------------------------------------------------------------------------------------------------------------------------------------------------------------------------------------------------------------------------------------------------------------------------------------------------------------------------------------------------------------------------------------------------------------------------------------------------------------------------------------------------------------------------------------------------------------------------------------------------------------------------------------------------------------------------|
| 459 | <p><b>ItiyA (157)</b></p> <hr/> <p><b>2a8nA (130)</b></p> | C | 30.00 | <p><b>TM-align:</b> aliSize=109 (resi) RMSD=1.92 (Å)<br/>       -NHETFLKRAVTLACEGVNAGIGGFGAVIVKDGAI AEGONNVITTSNDPTAHAEVTAIRKACKVLGAYO-DDCI IYTSCEPC-P-CLGAIYWARPKAVFYAAEHTdaaeafDDSFf---YKe-I dkaeertipfyqvtltehlsfqawrnfankeyl-----L-----<br/>       aERTHEMELALVEARSAGERD-EVIGAVLMLDRVILARSGNRTRELNDVTAHAETIAVIRMAEALQOERIPGADLVYTLLEPCtMAAAISFARIRRLYGAQDP-----KGG--avesGv-rF-----fsqptchhapdvysg</p> <p><b>SARST:</b> aliSize=99 (resi) RMSD=1.11 (Å)<br/>       n--HETFLKRAVTLACEGVNAGIGGFGAVIVKDGAI AEGONNVITTSNDPTAHAEVTAIRKACKVLGAYO-DDCI IYTSCEPC-P-CLGAIYWARPKAVFYAAEHT-----htdaaeagfddsfiykeidkaeertipfyqvtltehlsfqawrnfankeyl<br/>       -acERTHEMELALVEARSAGERD-EVIGAVLMLDRVILARSGNRTRELNDVTAHAETIAVIRMAEALQOERIPGADLVYTLLEPCtMAAAISFARIRRLYGAQDPkkgavesvrrffsqptchhapdvysg-----</p> <p><b>BLAST:</b> aliSize=51 (resi) iden=30.00% (39/130) simi=39.23% (51/130)<br/>       nhetflkravtlacegvnagigg-----FGAVIVKDGAI AEGONNVITTSNDPTAHAEVTAIRKACKVLGAYO-DDCI IYTSCEPC-P-CLGAIYWARPKAVFYAAEHT--DAAEAG-----fddsfiykeidkaeertipfyqvtltehlsfqawrnfankeyl<br/>       -----aerthfmealvearsagerdevFGAVIVKDGAI AEGONNVITTSNDPTAHAEVTAIRKACKVLGAYO-DDCI IYTSCEPC-P-CLGAIYWARPKAVFYAAEHT--DAAEAG-----fddsfiykeidkaeertipfyqvtltehlsfqawrnfankeyl<br/>       -----</p> <p><b>Proposed:</b> aliSize=119 (resi) RMSD=1.53 (Å)<br/>       MNHETFLKRAVTLACEGVNAGIGGFGAVIVKDGAI AEGONNVITTSNDPTAHAEVTAIRKACKVLGAYO-DDCI IYTSCEPC-P-CLGAIYWARPKAVFYAAEHTdaaeafDDSFf---YKEIdK-PAEertIPFYO-----vtltehlsfqawrnfankeyl<br/>       AERTHEMELALVEARSAGERD-EVIGAVLMLDRVILARSGNRTRELNDVTAHAETIAVIRMAEALQOERIPGADLVYTLLEPCtMAAAISFARIRRLYGAQDP-----PKGGaveSGVR-FfSQP---TCHhapdvysg-----</p>                                                                                                                                                                                                                                                                      |
| 460 | <p><b>ItiyA (157)</b></p> <hr/> <p><b>2b3jD (150)</b></p> | C | 29.33 | <p><b>TM-align:</b> aliSize=109 (resi) RMSD=2.05 (Å)<br/>       -NHETFLKRAVTLACEGVNAGIGGFGAVIVKDGAI AEGONNVITTSNDPTAHAEVTAIRKACKVLGAYO-DDCI IYTSCEPC-P-CLGAIYWARPKAVFYAAEHTdaaeafDDSFf---YKe-I dkaeertipfyqvtltehlsnfqawrnfankeyl-----<br/>       -NDIYMTLAIEEKAAQL-LGEVIGAITKDEVLARAHNLRLELQOPTAHAEHIAERAAKVLGWSWREGTLVYTLLEPCVMCAITVMSIPRIVYGADDP-----KGGC--sgsLM-nL-----lqsnfnhrai vdkgvlkeacstlltffk</p> <p>nrank</p> <p><b>SARST:</b> aliSize=107 (resi) RMSD=3.36 (Å)<br/>       n--HETFLKRAVTLACEGVNAGIGGFGAVIVKDGAI AEGONNVITTSNDPTAHAEVTAIRKACKVLGAYO-DDCI IYTSCEPC-P-CLGAIYWARPKAVFYAAEHTDAAEAG-----fddsfiykeidkaeertipfyqvtltehlsnfqawrnfankeyl<br/>       -ndiymTLAIEEKAAQL-LGEVIGAITKDEVLARAHNLRLELQOPTAHAEHIAERAAKVLGWSWREGTLVYTLLEPCVMCAITVMSIPRIVYGADDPKGGCSGslmnlqsnfnhrai vdkgvlkeacstlltffklnrank-----</p> <p><b>BLAST:</b> aliSize=55 (resi) iden=28.67% (43/150) simi=36.67% (55/150)<br/>       nhetflkra-----VTLACEGVNAGIGGFGAVIVKDGAI AEGONNVITTSNDPTAHAEVTAIRKACKVLGAYO-DDCI IYTSCEPC-P-CLGAIYWARPKAVFYAAEHT-----htdaaeagfddsfiykeidkaeertipfyqvtltehlsnfqawrnfankeyl<br/>       -----ndiymTLAIEEKAAQL-LGEVIGAITKDEVLARAHNLRLELQOPTAHAEHIAERAAKVLGWSWREGTLVYTLLEPCVMCAITVMSIPRIVYGADDPKGGCSGslmnlqsnfnhrai vdkgvlkeacstlltffklnrank-----</p> <p>vtltehlsnfqawrnfankeyl</p> <p><b>Proposed:</b> aliSize=134 (resi) RMSD=1.71 (Å)<br/>       m--HETFLKRAVTLACEGVNAGIGGFGAVIVKDGAI AEGONNVITTSNDPTAHAEVTAIRKACKVLGAYO-DDCI IYTSCEPC-P-CLGAIYWARPKAVFYAAEHT-----tdaeafddsfiykeIdkP-AEER-T-IPFYOVTLTEHLSPFQAWRNFA-NKK---eyl<br/>       -NDIYMTLAIEEKAAQL-LGEVIGAITKDEVLARAHNLRLELQOPTAHAEHIAERAAKVLGWSWREGTLVYTLLEPCVMCAITVMSIPRIVYGADDPKGGCSGsl-----M--NlQSNfnHRAI vdkgvlkeacstlltffklnrank-----</p>                                                                                                                                                                                                                            |
| 461 | <p><b>ItiyA (157)</b></p> <hr/> <p><b>2g84B (182)</b></p> | C | 27.39 | <p><b>TM-align:</b> aliSize=116 (resi) RMSD=1.36 (Å)<br/>       -----NHETFLKRAVTLACEGVNAGIGGFGAVIVK--DGAI AEGONNVITTSNDPTAHAEVTAIRKACKVLGAYO-ID----DII IYTSCEPC-P-CLGAIYWARPKAVFYAAEHTDAAEAGfDDSFfYkeIdKnaeertipfyqvtltehlsnfqawrnfankeyl-----<br/>       ghmdalhighlppflvqanneprvlaAPARMGYVLEVRANIA-D-GGPFAAVFErdSGLLAACTNRVPGRCSSAAHAEILALSQAQKIDTHDIsadglpAEIVTSAEPVmcFGAVISGVRSLVCAARSDVEAIGFDEG-PR--PE-----n</p> <p>wmggleargitvtgllrdaacallreynac</p> <p><b>SARST:</b> aliSize=118 (resi) RMSD=4.16 (Å)<br/>       n--HETFLKRAVTLACEGVNAGIGGFGAVIVK--DGAI AEGONNVITTSNDPTAHAEVTAIRKACKVLGAYO-ID----DII IYTSCEPC-P-CLGAIYWARPKAVFYAAEHTDAAEAGfDD-----SFIYKEID-----kpaeer<br/>       -ghmdalhighlppflvqanneprvlaAPARMGYVLEVRANIA-D-GGPFAAVFErdSGLLAACTNRVPGRCSSAAHAEILALSQAQKIDTHDIsadglpAEIVTSAEPVmcFGAVISGVRSLVCAARSDVEAIGFDEgprpenWGGLEARGitvtgllrdaacallreynac-----</p> <p>tipfyqvtltehlsnfqawrnfankeyl</p> <p><b>BLAST:</b> aliSize=48 (resi) iden=23.23% (36/157) simi=30.97% (48/157)<br/>       nhetflkravtlacegvn-----ghmdalhighlppflvqanneprvlaapearmgyvlelvraniAGIRGPEGAVIVK--DGAI AEGONNVITTSNDPTAHAEVTAIRKACKVLGAYO-ID----DII IYTSCEPC-P-CLGAIYWARPKAVFYAAEHTDAAEAGfDD-----KACKvlgaylddci IYTSCEPC-P-CLGAIYWARPKAVFYAAEHTDAAEAGfDD-----SFIYKEIDKPAE--ERTIPFYOVTLTEHLSPFQAWRNFA-N<br/>       -----ghmdalhighlppflvqanneprvlaapearmgyvlelvraniAGIRGPEGAVIVK--DGAI AEGONNVITTSNDPTAHAEVTAIRKACKVLGAYO-ID----DII IYTSCEPC-P-CLGAIYWARPKAVFYAAEHTDAAEAGfDD-----KACKvlgaylddci IYTSCEPC-P-CLGAIYWARPKAVFYAAEHTDAAEAGfDD-----SFIYKEIDKPAE--ERTIPFYOVTLTEHLSPFQAWRNFA-N<br/>       -----sfiykeidkaeertipfyqvtltehlsnfqawrnfankeyl</p> <p>vtvtgllrdaacallreynac</p> <p><b>Proposed:</b> aliSize=144 (resi) RMSD=1.59 (Å)<br/>       ghmdalhighlppflvqanneprvlaAPARMGYVLEVRANIA-D-GGPFAAVFErdSGLLAACTNRVPGRCSSAAHAEILALSQAQKIDTHDIsadglpAEIVTSAEPVmcFGAVISGVRSLVCAARSDVEAIGFDEgpr-----PENWmgLEARGITVTTGL-LRDAACALLREYNAC<br/>       kkeyl</p> |

|     |                                                     |   |       |                                                                                                                                                                                                                                                                                                                                                                                                                                                                                                                                                                                                                                                                                                                                                                                                                                                                                                                                                                                                                                                                                                                                                                                                                                                                                                                                                                                                                                                                                                                                                                                                                                                                                                                                                                                                                      |
|-----|-----------------------------------------------------|---|-------|----------------------------------------------------------------------------------------------------------------------------------------------------------------------------------------------------------------------------------------------------------------------------------------------------------------------------------------------------------------------------------------------------------------------------------------------------------------------------------------------------------------------------------------------------------------------------------------------------------------------------------------------------------------------------------------------------------------------------------------------------------------------------------------------------------------------------------------------------------------------------------------------------------------------------------------------------------------------------------------------------------------------------------------------------------------------------------------------------------------------------------------------------------------------------------------------------------------------------------------------------------------------------------------------------------------------------------------------------------------------------------------------------------------------------------------------------------------------------------------------------------------------------------------------------------------------------------------------------------------------------------------------------------------------------------------------------------------------------------------------------------------------------------------------------------------------|
| 462 | <p><b>ItiyA (157)</b></p> <p><b>2hvvA (143)</b></p> | C | 18.88 | <p><b>TM-align:</b> aliSize=101 (resi) RMSD=2.74 (Å)<br/> --NHETFLKRAVTLACEGVnagIG--GPFAGAVIKVDGAELEONNV---TTS-----N-----DPTAHAEVTAIRKACVLAyQLDDCIIYTSCEPCP-LGAIYWARPKAVFAAEHTdaaeafddSfiYKEIdkpaertipfyqvtltehlspfqawrnfankkeyl-----<br/> 1sWODYFMANELISKRS---TCnrAYVGAVLVKNNRLATCYNGGvadtdNCddvghEmedghcIRVVAEMNALIQCAKE-GI-SANNTEIYVTHFPCInTKALLOAGVVKITNTAYR-----I--HP-F-----aielmtqkeveyvqh</p> <p>-----<br/> dvprvkl</p> <p><b>SARST:</b> aliSize=106 (resi) RMSD=7.49 (Å)<br/> nhet--FLKRAVTLACEGVnagIG--GPFAGAVIKVDGAELEONNV---VTTS-----NDPTAH-AEVTAIRKAQKVLAYQLDDCIIYTSCEPCP-LGAIYWARPKAVFAAE-----HTDAAEAGFD-----dsfiykeidkpaertipfyqvtltehlspfqawrnfankkeyl<br/> ----1sWODYFMANELISKRSTCnrAYVGAVLVKNNRLATCYNGGvadtdnCDDVghemedGHCIRTVHAEMNALIQCAKEGI-SANNTEIYVTHFPCINTKALLOAGVVKITNTAYrihfaELMTQKEVEYvqhdvprvkl-----</p> <p><b>BLAST:</b> aliSize=50 (resi) iden=20.98% (30/143) simi=34.97% (50/143)<br/> nhetflkravtlacegvnagiggpl-----sWODYFMANELISKRSTCnrAYVGAVLVKNNRLATCYNGGvadtdNCddvghEmedghcIRVVAEMNALIQCAKEGI-SANNTEIYVTHFPCINTKALLOAGVVKITNTAYRIH--P--IELMTQKEVEYvqhdvprvkl<br/> -----1swqdyfmanaelskrstcnrayvGAVIKVDGAELEONNVTTSNPTahaevtairkakVLAyQLDDCIIYTSCEPCP-LGAIYWARPKAVFAAEHTDAAEAGFDSDSfiYKEIDKPAERTIpfVOVTLTEHlsPqAWRNFAK-K-EYL-----</p> <p><b>Proposed:</b> aliSize=112 (resi) RMSD=1.97 (Å)<br/> -MNHETFLKRAVTLACEGVnagIG--GPFAGAVIKVDGAELEONNV---TT-----sNDptAHAEVTAIRKACVLAyQLDDCIIYTSCEPCP-LGAIYWARPKAVFAAEHTdaaeafddSfiYKEIDKPAERTI-----pfyqvtltehlspfqawrnfankkeyl<br/> 1sWODYFMANELISKRS---TCnrAYVGAVLVKNNRLATCYNGGvadtdNCddvghEmedghcIRVVAEMNALIQCAKEGILS--ANNTEIYVTHFPCINTKALLOAGVVKITNTAY-----RIHPFAELMTQKE--VEYvqhdvprvkl-----</p>                                                                                                                                        |
| 463 | <p><b>lu6mA (189)</b></p> <p><b>lvkA (149)</b></p>  | C | 20.81 | <p><b>TM-align:</b> aliSize=135 (resi) RMSD=3.06 (Å)<br/> -SLIRSATKEDGOAARVVLVILKDMEL-PILEIV-seeqMid--LLae--AtaYpTYRy---y-ORILYEHA-GEVAIIAVGYPAEdekiideplrevfkkhgladvrlfieceeTL--PN-EWLDTSVDERFRGMGIGSKLDALPEVAKASKOALGINVDFDNpGARKLYASKCFK-DVTTMTISghlynmqkeve-<br/> eYTVVDGEE-YIEEKKIDREISYSFVRFPISYEY---E--rhEE--lfe--S-LLS-q--eHKFFALNERSELLGHVWICITL-----DTvdYVkiAIIYDIEVVKWARGLGIGSALRKAEWAKERAKKIVRVEIDN-PVWWEERYARALMEKPI</p> <p><b>SARST:</b> aliSize=135 (resi) RMSD=6.08 (Å)<br/> s-LIRSATKEDGOAARVVLVILKdmeIPILEEVs-----EOMIDLAEATAYptyrygyqRILVYEH---AGVVAIIAVGYPAEdekiideplrevfkkhgladvrlfieceeTLpNEWLDTSVDERFRGMGIGSKLDALPEVAKASKOALGINVDFDNpGARKLYASKCFK-DVTTMTISghlynmqkeve-<br/> -eYTVVDGEE-YIEEKKIDREISYSFVRFPISYEY---E--rhEE--lfe--S-LLS-q--eHKFFALNERSELLGHVWICITL-----ITLDTVDYVK-IAIYDIEVVKWARGLGIGSALRKAEWAKERAKKIVRVEIDN-PVWWEERYARALMEKPI</p> <p><b>BLAST:</b> aliSize=33 (resi) iden=16.78% (25/149) simi=22.15% (33/149)<br/> slirsatkedgqaiarlvlvilkdmelpileevseeqmidllaeatayptyrygyqRILVYEH---AGVVAIIAVGYPAEdekiideplrevfkkhgladvrlfieceeTLpNEWLDTSVDERFRGMGIGSKLDALPEVAKASKOALGINVDFDNpGARKLYASKCFK-DVTTMTISghlynmqkeve-<br/> -----eYTVVDGEE-YIEEKKIDREISYSFVRFPISYEY---E--rhEE--lfe--S-LLS-q--eHKFFALNERSELLGHVWICITL-----ITLDTVDYVK-IAIYDIEVVKWARGLGIGSALRKAEWAKERAKKIVRVEIDN-PVWWEERYARALMEKPI</p> <p><b>Proposed:</b> aliSize=131 (resi) RMSD=2.42 (Å)<br/> -SLIRSATKEDGOAARVVLVILKDMEL-PILEIV-seeqMid--LLae--AtaYpTYRy---y-ORILYEHA-GEVAIIAVGYPAEdekiideplrevfkkhgladvrlfieceeTLpNEWLDTSVDERFRGMGIGSKLDALPEVAKASKOALGINVDFDNpGARKLYASKCFK-DVTTMTISghlynmqkeve-<br/> eYTVVDGEE-YIEEKKIDREISYSFVRFPISYEY---E--rhEE--lfe--S-LLS-q--eHKFFALNERSELLGHVWICITL-----ITLDTVDYVK-IAIYDIEVVKWARGLGIGSALRKAEWAKERAKKIVRVEIDN-PVWWEERYARALMEKPI</p> <p><b>TMISghlynmqkeve</b><br/> ALMEKPI</p> |
| 464 | <p><b>lu6mA (189)</b></p> <p><b>2d4pA (130)</b></p> | C | 16.15 | <p><b>TM-align:</b> aliSize=119 (resi) RMSD=2.84 (Å)<br/> SLIRSATKEDGOAARVVLVILKdmeIPILEEVsEOMIDLAEATAYptyryGYOR--ILVYEHAGVVAIIAVGYPAEdekiideplrevfkkhgladvrlfieceeTLpNEWLDTSVDERFRGMGIGSKLDALPEVAKASKOALGINVDFDNpGARKLYASKCFK-DVTTMTISghlynmqkeve-<br/> MRFPPFEEDLDRLNRLA-GKR-----PV--SL-GALR--F--FARTghSFLAEEGEPMCFALAQAQVW-----QgeaTTLVTRLEG---RSVEALRGLRAVVKSYDAGVYEVALHLD--PERKELEEBALKAEFGAIGPLVLAARVLSR</p> <p><b>SARST:</b> aliSize=121 (resi) RMSD=6.46 (Å)<br/> s-LIRSATKEDGOAARVVLVILKdmeIPILEEVsEOMIDLAEATAYptyryGYOR--ILVYEHAGVVAIIAVGYPAEdekiideplrevfkkhgladvrlfieceeTLpNEWLDTSVDERFRGMGIGSKLDALPEVAKASKOALGINVDFDNpGARKLYASKCFK-DVTTMTISghlynmqkeve-<br/> -mRFPFEEDLDRLNRLA-GKR-----PV--SL-GALR--F--FARTghSFLAEEGEPMCFALAQAQVW-----QgeaTTLVTRLEG---RSVEALRGLRAVVKSYDAGVYEVALHLD--PERKELEEBALKAEFGAIGPLVLAARVLSR</p> <p><b>BLAST:</b> aliSize=26 (resi) iden=10.00% (13/130) simi=20.00% (26/130)<br/> slirsatkedgqaiarlvlvilkdmelpileevseeqmidllaeatayptyrygyqRILVYEHAGVVAIIAVGYPAEdekiideplrevfkkhgladvrlfieceeTLpNEWLDTSVDERFRGMGIGSKLDALPEVAKASKOALGINVDFDNpGARKLYASKCFK-DVTTMTISghlynmqkeve-<br/> -----mRFPFEEDLDRLNRLA-GKR-----PV--SL-GALR--F--FARTghSFLAEEGEPMCFALAQAQVW-----QgeaTTLVTRLEG---RSVEALRGLRAVVKSYDAGVYEVALHLD--PERKELEEBALKAEFGAIGPLVLAARVLSR</p> <p><b>Proposed:</b> aliSize=121 (resi) RMSD=2.53 (Å)<br/> SLIRSATKEDGOAARVVLVILKdmeIPILEEVsEOMIDLAEATAYptyryGYOR--ILVYEHAGVVAIIAVGYPAEdekiideplrevfkkhgladvrlfieceeTLpNEWLDTSVDERFRGMGIGSKLDALPEVAKASKOALGINVDFDNpGARKLYASKCFK-DVTTMTISghlynmqkeve-<br/> MRFPPFEEDLDRLNRLA-GKR-----PV--SL-GALR--F--FARTghSFLAEEGEPMCFALAQAQVW-----QgeaTTLVTRLEG---RSVEALRGLRAVVKSYDAGVYEVALHLD--PERKELEEBALKAEFGAIGPLVLAARVLSR</p> <p><b>NHMQkeve</b><br/> LGSR----</p>                                                                          |

|     |                                             |   |                                                                                                                                                                                                                                                                                                                                                                                                                                                                                                                                                                                                                                                                                                                                                                                                                                                                                                                                                                                                                                                                                                                                                                                                                                                                                                                                                                                                                                                                                                                                                                                                                                                                                                                                                                                                                                                                                                                                                                                               |
|-----|---------------------------------------------|---|-----------------------------------------------------------------------------------------------------------------------------------------------------------------------------------------------------------------------------------------------------------------------------------------------------------------------------------------------------------------------------------------------------------------------------------------------------------------------------------------------------------------------------------------------------------------------------------------------------------------------------------------------------------------------------------------------------------------------------------------------------------------------------------------------------------------------------------------------------------------------------------------------------------------------------------------------------------------------------------------------------------------------------------------------------------------------------------------------------------------------------------------------------------------------------------------------------------------------------------------------------------------------------------------------------------------------------------------------------------------------------------------------------------------------------------------------------------------------------------------------------------------------------------------------------------------------------------------------------------------------------------------------------------------------------------------------------------------------------------------------------------------------------------------------------------------------------------------------------------------------------------------------------------------------------------------------------------------------------------------------|
| 465 | <p>1u6mA (189)</p> <hr/> <p>2f5iA (167)</p> | C | <p>21.56</p> <p><b>TM-align:</b> aliSize=133 (resi) RMSD=2.53 (Å)<br/> -<b>S</b>LSATKEGOAARLVVIL-D-<b>M</b>LpLLeevseeqmidLAEATAY-P---TYRygyqRIIYHAG-----EVAGIIVGPAEdekiideplrevfkkhglaedvrlfieet---LPNEWYDTISVDERFRMGIGSKLDAPEVAKASGKOALGLNDFDNGARKLYASKFKDVF---<br/> kFVIRPATAACSDLLRIKELAYEYME-Q---V---I---TEKDLEdGfgehPFY---HCLVAVPKehwtpEGHSIVGFAMYFTY-----dpwIGKLLYLEDFMMSDYRGFGIGSEIKNSQVAMRCRCSSMHFLAEWNEPSINFKRRGASDL</p> <p><b>TT--MTISgh</b>lynhmqkeve-----<br/> <b>S</b>SecgWRLR-----kidkeyllkmat</p> <p><b>SARST:</b> aliSize=135 (resi) RMSD=6.09 (Å)<br/> s---LRSATKEGOAARLVVILDMELPILEEVSFEOMIDLaeatayPTYRYGYORIIYH-----AIE-VAGIIVGPAEdekiideplrevfkkhglaedvrlfIEEETlpneWYDTISVDERFRMGIGSKLDAPEVAKASGKOALGLNDFDNGARKLYASKFKD-----<br/> -kfVIRPATAACSDLLRIKELAYEYMEEQVILT-KDLED-----GFGHPFYHCLVAVPKehwtpEGHSIVGFAMYFTY-----TYDPWIGK---L---LEDFMMSDYRGFGIGSEIKNSQVAMRCRCSSMHFLAEWNEPSINFKRRGASDLsseeqwrIF</p> <p>-----vttmtisghlynhmqkev<br/> kidkeyllkmat-----</p> <p><b>BLAST:</b> aliSize=71 (resi) iden=27.54% (46/167) simi=42.51% (71/167)<br/> s---LRSATKEGOAARLVVILdmlpileVSEECM-----DLAEATA-YPTyrygyqRIIYHAGvagiavGYPADKIDeplrevfkkhglaedvRLIEEETLPNEWYDTISVDERFRMGIGSKLDAPEVAKASGKOALG-NVDFDNGARKLYASKFKDVT-----<br/> -kfVIRPATAACSDLLRIKELAYEYMEEQVILtekDLLEDGFGHPFY---HCLVAVPK-----HWTPGHSIV-----GFA---MYYTYDPWIGKLLYLEDFMMSDYRGFGIGSEIKNSQVAMRCRCSSMHFLAEWNEPSINFKRRGASDLSSeegwrIFkI</p> <p>-----mtisghlynhmqkev<br/> dkeyllkmat-----</p> <p><b>Proposed:</b> aliSize=137 (resi) RMSD=2.04 (Å)<br/> -<b>S</b>LSATKEGOAARLVVIL-D-<b>M</b>LpLLeevseeqmidLAEATA-YP---TYRygyqRIIYHAG-----EVAGIIVGPAEdekiideplrevfkkhglaedvrlfieetLP---NEWYDTISVDERFRMGIGSKLDAPEVAKASGKOALGLNDFDNGARKLYASKFKDVF---<br/> kFVIRPATAACSDLLRIKELAYEYME-Qv-----I---TEKDLEdGfgehPFY---HCLVAVPKehwtpEGHSIVGFAMYFTY-----DpwIGKLLYLEDFMMSDYRGFGIGSEIKNSQVAMRCRCSSMHFLAEWNEPSINFKRRGAS</p> <p><b>hvtmtIS--GHLYNHMOKEV</b>-----<br/> <b>D</b>-----DLSS-EEGWRLFKIDKylkmat</p>                        |
| 466 | <p>1u6mA (189)</p> <hr/> <p>2g3tB (168)</p> | C | <p>22.02</p> <p><b>TM-align:</b> aliSize=133 (resi) RMSD=2.50 (Å)<br/> -<b>S</b>LSATKEGOAARLVVIL-D-<b>M</b>LpLLeevseeqmidLAEATAY-P---TYRygyqRIIYHAG-----EVAGIIVGPAEdekiideplrevfkkhglaedvrlfieet---LPNEWYDTISVDERFRMGIGSKLDAPEVAKASGKOALGLNDFDNGARKLYASKFKDVF---<br/> kFVIRPATAACSDLLRIKELAYEYMEQ-V---I---TEKDLEdGfgehPFY---HCLVAVPKehwtpEGHSIVGFAMYFTY-----dpwIGKLLYLEDFMMSDYRGFGIGSEIKNSQVAMRCRCSSMHFLAEWNEPSINFKRRGASDL</p> <p><b>T---TMTISgh</b>lynhmqkeve-----<br/> <b>S</b>SecgWRLFK-----idkeyllkmate</p> <p><b>SARST:</b> aliSize=132 (resi) RMSD=6.20 (Å)<br/> s---LRSATKEGOAARLVVILkDMELPI---LEEVSseeqmidLAEATAYPTyrygyqRIIYHAGvagiavGYPADKIDeplrevfkkhglaedvRLIEEETLPNEWYDTISVDERFRMGIGSKLDAPEVAKASGKOALG-NVDFDNGARKLYASKFKDVT-----<br/> -kfVIRPATAACSDLLRIKEL--AKYEYMEeqVILT-----EKDLEDG--FGEHPFYHCLVAVPKehwtpEGHSIVGFAMYFTY-----FTYDPWIGK---L---LEDFMMSDYRGFGIGSEIKNSQVAMRCRCSSMHFLAEWNEPSINFKRRGASDLsseeqwrIFkI</p> <p>-----vttmtisghlynhmqkev<br/> rIfkidkeyllkmate-----</p> <p><b>BLAST:</b> aliSize=71 (resi) iden=27.38% (46/168) simi=42.26% (71/168)<br/> s---LRSATKEGOAARLVVILdmlpileVSEECM-----DLAEATA-YPTyrygyqRIIYHAGvagiavGYPADKIDeplrevfkkhglaedvRLIEEETLPNEWYDTISVDERFRMGIGSKLDAPEVAKASGKOALG-NVDFDNGARKLYASKFKDVT-----<br/> -kfVIRPATAACSDLLRIKELAYEYMEEQVILtekDLLEDGFGHPFY---HCLVAVPK-----HWTPGHSIV-----GFA---MYYTYDPWIGKLLYLEDFMMSDYRGFGIGSEIKNSQVAMRCRCSSMHFLAEWNEPSINFKRRGASDLSSeegwrIFkI</p> <p>-----mtisghlynhmqkev<br/> dkeyllkmate-----</p> <p><b>Proposed:</b> aliSize=138 (resi) RMSD=2.00 (Å)<br/> -<b>S</b>LSATKEGOAARLVVIL-D-<b>M</b>LpLLeevseeqmidLAEATA-YP---TYRygyqRIIYHAG-----EVAGIIVGPAEdekiideplrevfkkhglaedvrlfieetLP---NEWYDTISVDERFRMGIGSKLDAPEVAKASGKOALGLNDFDNGARKLYASKFKDVF---<br/> kFVIRPATAACSDLLRIKELAYEYME-Qv-----I---TEKDLEdGfgehPFY---HCLVAVPKehwtpEGHSIVGFAMYFTY-----DpwIGKLLYLEDFMMSDYRGFGIGSEIKNSQVAMRCRCSSMHFLAEWNEPSINFKRRGAS</p> <p><b>D-vttMTISGHLYNHMOKEV</b>-----<br/> <b>D</b>-----SS--EEGWRLFKIDKylkmate</p>             |
| 467 | <p>1u6mA (189)</p> <hr/> <p>2jevA (169)</p> | C | <p>20.71</p> <p><b>TM-align:</b> aliSize=133 (resi) RMSD=2.56 (Å)<br/> -<b>S</b>LSATKEGOAARLVVIL-D-<b>M</b>LpLLeevseeqmidLAEATAY-P---TYRygyqRIIYHAG-----EVAGIIVGPAEdekiideplrevfkkhglaedvrlfieet---LPNEWYDTISVDERFRMGIGSKLDAPEVAKASGKOALGLNDFDNGARKLYASKFKDVF---<br/> akFVIRPATAACSDLLRIKELAYEYME-Qv-----I---TEKDLEdGfgehPFY---HCLVAVPKehwtpEGHSIVGFAMYFTY-----dpwIGKLLYLEDFMMSDYRGFGIGSEIKNSQVAMRCRCSSMHFLAEWNEPSINFKRRGASDL</p> <p><b>VT--MTISgh</b>lynhmqkeve-----<br/> <b>L</b>SSecgWRLR-----kidkeyllkmate</p> <p><b>SARST:</b> aliSize=131 (resi) RMSD=6.15 (Å)<br/> s---LRSATKEGOAARLVVILkDMELPIL---EEVSseeqmidLAEATAYPTyrygyqRIIYHAGvagiavGYPADKIDeplrevfkkhglaedvRLIEEETLPNEWYDTISVDERFRMGIGSKLDAPEVAKASGKOALGLNDFDNGARKLYASKFKDVF---<br/> -akfVIRPATAACSDLLRIKEL--AKYEYMEeqVILT-----EKDLEDG--FGEHP--FYHCLVAevpkewtpEGHSIVGFAMYFTY-----FTYDPWIGK---L---LEDFMMSDYRGFGIGSEIKNSQVAMRCRCSSMHFLAEWNEPSINFKRRGASDLsseeqwrIFkI</p> <p>-----tmtisghlynhmqkev<br/> egwrIfkidkeyllkmate-----</p> <p><b>BLAST:</b> aliSize=71 (resi) iden=27.22% (46/169) simi=42.01% (71/169)<br/> s---LRSATKEGOAARLVVILdmlpileVSEECM-----DLAEATA-YPTyrygyqRIIYHAGvagiavGYPADKIDeplrevfkkhglaedvRLIEEETLPNEWYDTISVDERFRMGIGSKLDAPEVAKASGKOALG-NVDFDNGARKLYASKFKDVT-----<br/> -akfVIRPATAACSDLLRIKELAYEYMEEQVILtekDLLEDGFGHPFY---HCLVAVPK-----HWTPGHSIV-----GFA---MYYTYDPWIGKLLYLEDFMMSDYRGFGIGSEIKNSQVAMRCRCSSMHFLAEWNEPSINFKRRGASDLSSeegwrIFkI</p> <p>-----mtisghlynhmqkev<br/> idkeyllkmate-----</p> <p><b>Proposed:</b> aliSize=136 (resi) RMSD=2.07 (Å)<br/> -<b>S</b>LSATKEGOAARLVVIL-D-<b>M</b>LpLLeevseeqmidLAEATA-YP---TYRygyqRIIYHAG-----EVAGIIVGPAEdekiideplrevfkkhglaedvrlfieetLP---NEWYDTISVDERFRMGIGSKLDAPEVAKASGKOALGLNDFDNGARKLYASKFKDVF---<br/> akFVIRPATAACSDLLRIKELAYEYME-Qv-----I---TEKDLEdGfgehPFY---HCLVAVPKehwtpEGHSIVGFAMYFTY-----DpwIGKLLYLEDFMMSDYRGFGIGSEIKNSQVAMRCRCSSMHFLAEWNEPSINFKRRGAS</p> <p><b>-kdvttMTISGHLYNHMOKEV</b>-----<br/> <b>sd</b>-----LSs--EEGWRLFKIDkeyllkmate</p> |

|     |                |   |       |                                                                                                                                                                                                                                                                                                                                                                                                                                                                                                                                                                                                                                                                                                                                                                                                                                                                                                                                                                                                                                                                                                                                                                                                                                                                                                                                                                                                                                                             |
|-----|----------------|---|-------|-------------------------------------------------------------------------------------------------------------------------------------------------------------------------------------------------------------------------------------------------------------------------------------------------------------------------------------------------------------------------------------------------------------------------------------------------------------------------------------------------------------------------------------------------------------------------------------------------------------------------------------------------------------------------------------------------------------------------------------------------------------------------------------------------------------------------------------------------------------------------------------------------------------------------------------------------------------------------------------------------------------------------------------------------------------------------------------------------------------------------------------------------------------------------------------------------------------------------------------------------------------------------------------------------------------------------------------------------------------------------------------------------------------------------------------------------------------|
| 468 | 1v9yA<br>(103) | N | 15.53 | <p><b>TM-align:</b> aliSize=96 (resi) RMSD=2.10 (Å)<br/> g-----I-FF---PaLEQNMMGAVLINENDEVMFFNPAAEKLWYKREEVIGNNID--MLIPrdLRPA-HPEYIRHNRE-----RLEQLEKkDGSKIWTRFALS<sup>SV</sup>SAegKVY<sup>L</sup>LALVRD-<br/> -mehvafgsedientLaKMDdgQLDGLAFGAIQLDGDGNILQYNAEEDITSRDPKQVIGKNFFkdVAPC--TDSPeFYGKFKEGVAsgnlntmfEYTFDY-QMTPKVKVHMKKALS--GDSYWFVKRv</p> <p><b>SARST:</b> aliSize=86 (resi) RMSD=13.30 (Å)<br/> gif-----FPALEQNMMGAVLINENDEVMFFNPAAEKLWYKREEVIGNNI-----DMLIPrdLRPAHP<sup>EYI</sup>rhnrerelqlekK<sup>D</sup>SKIWTRFALS<sup>SKV</sup>SAEGKVY<sup>YL</sup>LALV-----rd<br/> ---mehvafgsedientlakmdDGQLDGLAFGAIQLDGDGNILQYNAEEDITSRDPKQVIGKNFFkdvaPCTDSPEFYGKFKEGV-----AS<sup>LN</sup>LNLMFEYTFDYQMTPTKVKVHMKKalsgdsywwfvkrv--</p> <p><b>BLAST:</b> aliSize=26 (resi) iden=13.59% (14/103) simi=25.24% (26/103)<br/> giffpaLeqnm-----GAVLINENDEVMFFNPAAEKLWYKREEVIGNNIDmliPRdLRPA--HPEY-----irhnrerelqlekKdgskiwtrfalskvsaeqkvyylalvrd<br/> -----mehvafgsedientlakmdggldglafGAIQLDGDGNILQYNAEEDITSRDPKQVIGKNFF----KDVAPCtdSP<sup>EY</sup>fygkfkgevasgnlntmfeytfdyqmtptkvkvhmkkalsgdsywwfvkrv-----</p> <p><b>Proposed:</b> aliSize=99 (resi) RMSD=1.95 (Å)<br/> -----GIFFPA---LEQNMMGAVLINENDEVMFFNPAAEKLWYKREEVIGNNID-MLIPrdLRPA-HPEYIRHNRE-----RLEQLEKkDGSKIWTRFALS<sup>SKV</sup>SAegKVY<sup>L</sup>LALVRD-h<br/> mehvafgsedientLaKMDdgQLDGLAFGAIQLDGDGNILQYNAEEDITSRDPKQVIGKNFFkdVAPC--TDSPeFYGKFKEGVAsgnlntmfEYTFDY-QMTPKVKVHMKKALS--GDSYWFVKRv-</p> |
| 469 | 1v9yA<br>(103) | N | 15.53 | <p><b>TM-align:</b> aliSize=97 (resi) RMSD=2.04 (Å)<br/> g-----IFF-PALEQNMMGAVLINENDEVMFFNPAAEKLWYKREEVIGNNID--MLIPrdLRPA-HPEYIRHNRE-----RLEQLEKkDGSKIWTRFALS<sup>SKV</sup>SAegKVY<sup>L</sup>LALVRD-<br/> -vafgsedientLaKMDdgQLDGLAFGAIQLDGDGNILQYNAEEDITSRDPKQVIGKNFFkdVAPC--TDSPeFYGKFKEGVAsgnlntmfEYTFDY-QMTPKVKVHMKKALS--GDSYWFVKRv</p> <p><b>SARST:</b> aliSize=86 (resi) RMSD=13.32 (Å)<br/> gif-----FPALEQNMMGAVLINENDEVMFFNPAAEKLWYKREEVIGNNI-----DMLIPrdLRPAHP<sup>EYI</sup>rhnrerelqlekK<sup>D</sup>SKIWTRFALS<sup>SKV</sup>SAEGKVY<sup>YL</sup>LALV-----rd<br/> ---vafgsedientlakmdDGQLDGLAFGAIQLDGDGNILQYNAEEDITSRDPKQVIGKNFFkdvaPCTDSPEFYGKFKEGV-----AS<sup>LN</sup>LNLMFEYTFDYQMTPTKVKVHMKKalsgdsywwfvkrv--</p> <p><b>BLAST:</b> aliSize=26 (resi) iden=12.62% (13/103) simi=25.24% (26/103)<br/> giffpaLeqnm-----GAVLINENDEVMFFNPAAEKLWYKREEVIGNNIDmliPRdLRPA--HPEY-----irhnrerelqlekKdgskiwtrfalskvsaeqkvyylalvrd<br/> -----vafgsedientlakmdggldglafGAIQLDGDGNILQYNAEEDITSRDPKQVIGKNFF----KDVAPCtdSP<sup>EY</sup>fygkfkgevasgnlntmfeytfdyqmtptkvkvhmkkalsgdsywwfvkrv-----</p> <p><b>Proposed:</b> aliSize=99 (resi) RMSD=2.05 (Å)<br/> GI-----F--FP-----LEQNMMGAVLINENDEVMFFNPAAEKLWYKREEVIGNNID-MLIPrdLRPA-HPEYIRHNRE-----RLEQLEKkDGSKIWTRFALS<sup>SKV</sup>SAegKVY<sup>L</sup>LALVRD-h<br/> VafgsedientLaKMDdgQLDGLAFGAIQLDGDGNILQYNAEEDITSRDPKQVIGKNFFkdVAPC--TDSPeFYGKFKEGVAsgnlntmfEYTFDY-QMTPKVKVHMKKALS--GDSYWFVKRv-</p>            |
| 470 | 1v9yA<br>(103) | N | 15.53 | <p><b>TM-align:</b> aliSize=97 (resi) RMSD=2.07 (Å)<br/> g-----IFF-PALEQNMMGAVLINENDEVMFFNPAAEKLWYKREEVIGNNID--MLIPrdLRPA-HPEYIRHNRE-----RLEQLEKkDGSKIWTRFALS<sup>SKV</sup>SAegKVY<sup>L</sup>LALVRD-<br/> -vafgsedientLaKMDdgQLDGLAFGAIQLDGDGNILQYNAEEDITSRDPKQVIGKNFFkdVAPC--TDSPeFYGKFKEGVAsgnlntmfEYTFDY-QMTPKVKVHMKKALS--GDSYWFVKRv</p> <p><b>SARST:</b> aliSize=86 (resi) RMSD=13.30 (Å)<br/> gif-----FPALEQNMMGAVLINENDEVMFFNPAAEKLWYKREEVIGNNI-----DMLIPrdLRPAHP<sup>EYI</sup>rhnrerelqlekK<sup>D</sup>SKIWTRFALS<sup>SKV</sup>SAEGKVY<sup>YL</sup>LALV-----rd<br/> ---vafgsedientlakmdDGQLDGLAFGAIQLDGDGNILQYNAEEDITSRDPKQVIGKNFFkdvaPCTDSPEFYGKFKEGV-----AS<sup>LN</sup>LNLMFEYTFDYQMTPTKVKVHMKKalsgdsywwfvkrv--</p> <p><b>BLAST:</b> aliSize=25 (resi) iden=11.65% (12/103) simi=24.27% (25/103)<br/> giffpaLeqnm-----GAVLINENDEVMFFNPAAEKLWYKREEVIGNNIDmliPRdLRPA--HPEY-----irhnrerelqlekKdgskiwtrfalskvsaeqkvyylalvrd<br/> -----vafgsedientlakmdggldglafGAIQLDGDGNILQYNAEEDITSRDPKQVIGKNFF----KDVAPCtdSP<sup>EY</sup>fygkfkgevasgnlntmfeytfdyqmtptkvkvhmkkalsgdsywwfvkrv-----</p> <p><b>Proposed:</b> aliSize=99 (resi) RMSD=2.04 (Å)<br/> G-----IFFP-A-----LEQNMMGAVLINENDEVMFFNPAAEKLWYKREEVIGNNID-MLIPrdLRPA-HPEYIRHNRE-----RLEQLEKkDGSKIWTRFALS<sup>SKV</sup>SAegKVY<sup>L</sup>LALVRD-h<br/> VafgsedientLaKMDdgQLDGLAFGAIQLDGDGNILQYNAEEDITSRDPKQVIGKNFFkdVAPC--TDSPeFYGKFKEGVAsgnlntmfEYTFDY-QMTPKVKVHMKKALS--GDSYWFVKRv-</p>            |

|     |                                             |   |       |                                                                                                                                                                                                                                                                                                                                                                                                                                                                                                                                                                                                                                                                                                                                                                                                                                                                                                                                                                                                                                                                                                                                                                                                                                                                                                                                                       |
|-----|---------------------------------------------|---|-------|-------------------------------------------------------------------------------------------------------------------------------------------------------------------------------------------------------------------------------------------------------------------------------------------------------------------------------------------------------------------------------------------------------------------------------------------------------------------------------------------------------------------------------------------------------------------------------------------------------------------------------------------------------------------------------------------------------------------------------------------------------------------------------------------------------------------------------------------------------------------------------------------------------------------------------------------------------------------------------------------------------------------------------------------------------------------------------------------------------------------------------------------------------------------------------------------------------------------------------------------------------------------------------------------------------------------------------------------------------|
| 471 | <p>1v9yA (103)</p> <hr/> <p>lgsxA (122)</p> | N | 13.59 | <p><b>TM-align:</b> aliSize=97 (resi) RMSD=2.12 (Å)<br/> g-----IFF-PALEQNMMGAVLINENDEVMFFNPAAEKLWGYKREEVIGNNID--MLIPrdLRPA-HPEYIRHNRE-----RELQLEKkDGSKIWTRFALSKVSAegKvYyLALVRD-<br/> -vafgsedientlAkmdDgQLDGLAFGAIQLDGDGNILQYNAAESDITSRDPKQVIGKNFFkdVAPC--TDSPEFYGKFKEGVASgnIntmFYYTFDY-QMTPKVKVHMKKALS--GDSYVWFVKRv</p> <p><b>SARST:</b> aliSize=99 (resi) RMSD=4.85 (Å)<br/> gif-----FPALEQNMMGAVLINENDEVMFFNPAAEKLWGYKREEVIGNNI-----DMLIPrdLRPAHPEYIRHNRERELQLEKkDGSKIWTRFALSKVSAegKvYyLALVR--d<br/> ---vafgsedientlAkmdDGQLDGLAFGAIQLDGDGNILQYNAAESDITSRDPKQVIGKNFFkdvaPCTDSPEFYGKFKEGVASGNLNTMFEYTFYQMTPTKVKVHMKKALSgDSYVWFVKrv-</p> <p><b>BLAST:</b> aliSize=25 (resi) iden=11.65% (12/103) simi=24.27% (25/103)<br/> giffpaLeqnm-----GAVLINENDEVMFFNPAAEKLWGYKREEVIGNNIDmliPrdLRPA--HPEY-----irhnreRelqlekkDgskIwtrfalskvsAegkvYyLalvrd<br/> -----vafgsedientlAkmdDgQLDGLAFGAIQLDGDGNILQYNAAESDITSRDPKQVIGKNFF----KDVAPCtdSPEFYgkfkegvasgnIntmfeytdyqmtptkvkvhmkalsgdsywwfvkrv-----</p> <p><b>Proposed:</b> aliSize=99 (resi) RMSD=2.06 (Å)<br/> GI-----F-FPA-----LEQNMMGAVLINENDEVMFFNPAAEKLWGYKREEVIGNNID-MLIPrdLRPA-HPEYIRHNRE-----RELQLEKkDGSKIWTRFALSKVSAegKvYyLALVRD-h<br/> VafgsedientlAkmdDgQLDGLAFGAIQLDGDGNILQYNAAESDITSRDPKQVIGKNFFkdVAPC-TDSPEFYGKFKEGVASgnIntmFYYTFDYQMTPTKVKVHMKKALS--GDSYVWFVKRv-</p>                           |
| 472 | <p>1v9yA (103)</p> <hr/> <p>lmzuB (114)</p> | N | 13.59 | <p><b>TM-align:</b> aliSize=98 (resi) RMSD=2.32 (Å)<br/> ---G--IFF-PALEQNMMGAVLINENDEVMFFNPAAEKLWGYKREEVIGNNID--MLIPrdLRPA-HPEYIRHNRE-----RELQLEKkDGSKIWTRFALSKVSAegKvYyLALVRD<br/> irgTidGmgTAEFDALPVGAIQVDGSGVIHRYNRTESRISCRIPERVIGRNFfteVAPC--TNIPaFSGRFMDGVTsgtldarDFDFVDF-QMAPVRVQIRMQAGV--PDRYWI FVRK</p> <p><b>SARST:</b> aliSize=97 (resi) RMSD=3.81 (Å)<br/> gif-----FPALEQNMMGAVLINENDEVMFFNPAAEKLWGYKREEVIGNNIDMLIPrdLRPAHPEYIRHNRE-----ELQLEKkDGSKIWTRFALSKVSAegkvYyLALVRD<br/> ---irgtidGmgTAEFDALPVGAIQVDGSGVIHRYNRTESRISCRIPERVIGRNFfteVAPCTniPAFSGRFMDGVTsgtldarDFDFVDFQMAPVRVQIRMQAGVPD---RYWIFVRK</p> <p><b>BLAST:</b> aliSize=18 (resi) iden=9.71% (10/103) simi=17.48% (18/103)<br/> giffpaLeqnm-----MGAVLINENDEVMFFNPAAEKLWGYKREEVIGNNI-----idmliprdlrpahpeyirhnreRelqlekkDgskIwtrfalskvsAegkvYyLalvrd<br/> -----irgtidGmgTAEFDALPVGAIQVDGSGVIHRYNRTESRISCRIPERVIGRNFftevapctnipafsgrfmdgvtsgtldarDFDFVDFQMAPVRVQIRMQAGVPdrywifvrk-----</p> <p><b>Proposed:</b> aliSize=98 (resi) RMSD=1.92 (Å)<br/> --GIFFP---ALEQNMMGAVLINENDEVMFFNPAAEKLWGYKREEVIGNNID--MLIPrdLRPA-HPEYIRHNRE-----RELQLEKkDGSKIWTRFALSKVSAegKvYyLALVRDh<br/> irgTidGmgTAEFDALPVGAIQVDGSGVIHRYNRTESRISCRIPERVIGRNFfteVAPC--TNIPaFSGRFMDGVTsgtldarDFDFVDF-QMAPVRVQIRMQAGV--PDRYWI FVRK-</p>                                                                     |
| 473 | <p>1v9yA (103)</p> <hr/> <p>lot6A (125)</p> | N | 14.56 | <p><b>TM-align:</b> aliSize=96 (resi) RMSD=2.05 (Å)<br/> g-I-----FF---PaLEQNMMGAVLINENDEVMFFNPAAEKLWGYKREEVIGNNID--MLIPrdLRPA-HPEYIRHNRE-----RELQLEKkDGSKIWTRFALSKVSAegKvYyLALVRD-<br/> -mEhVafgsedientlAkmdDgQLDGLAFGAIQLDGDGNILQYNAAQGDITSRDPKQVIGKNFFkdVAPC--TDSPEFYGKFKEGVASgnIntmFYYTFDY-QMTPKVKVHMKKALSg--DSYVWFVKRv</p> <p><b>SARST:</b> aliSize=86 (resi) RMSD=13.34 (Å)<br/> gif-----FPALEQNMMGAVLINENDEVMFFNPAAEKLWGYKREEVIGNNI-----DMLIPrdLRPAHPEYIRHNRERELQLEKkDGSKIWTRFALSKVSAegKvYyLALV-----rd<br/> ---mehVafgsedientlAkmdDgQLDGLAFGAIQLDGDGNILQYNAAQGDITSRDPKQVIGKNFFkdvaPCTDSPEFYGKFKEGV-----ASGNLNTMFEYTFDYQMTPTKVKVHMKKALSgdsywwfvkrv--</p> <p><b>BLAST:</b> aliSize=26 (resi) iden=12.62% (13/103) simi=25.24% (26/103)<br/> giffpaLeqnm-----GAVLINENDEVMFFNPAAEKLWGYKREEVIGNNIDmliPrdLRPA--HPEY-----irhnreRelqlekkDgskIwtrfalskvsAegkvYyLalvrd<br/> -----mehVafgsedientlAkmdDgQLDGLAFGAIQLDGDGNILQYNAAQGDITSRDPKQVIGKNFF----KDVAPCtdSPEFYgkfkegvasgnIntmfeytdyqmtptkvkvhmkalsgdsywwfvkrv-----</p> <p><b>Proposed:</b> aliSize=99 (resi) RMSD=2.03 (Å)<br/> ---G-----IFFPA---LEQNMMGAVLINENDEVMFFNPAAEKLWGYKREEVIGNNID-MLIPrdLRPA-HPEYIRHNRE-----RELQLEKkDGSKIWTRFALSKVSAegKvYyLALVRD-h<br/> mehVafgsedientlAkmdDgQLDGLAFGAIQLDGDGNILQYNAAQGDITSRDPKQVIGKNFFkdVAPC-TDSPEFYGKFKEGVASgnIntmFYYTFDYQMTPTKVKVHMKKALS--GDSYVWFVKRv-</p> |

|     |                                                     |   |       |                                                                                                                                                                                                                                                                                                                                                                                                                                                                                                                                                                                                                                                                                                                                                                                                                                                                                                                                                                                                                                                                                                                                                                                                                                                                                                                                                  |
|-----|-----------------------------------------------------|---|-------|--------------------------------------------------------------------------------------------------------------------------------------------------------------------------------------------------------------------------------------------------------------------------------------------------------------------------------------------------------------------------------------------------------------------------------------------------------------------------------------------------------------------------------------------------------------------------------------------------------------------------------------------------------------------------------------------------------------------------------------------------------------------------------------------------------------------------------------------------------------------------------------------------------------------------------------------------------------------------------------------------------------------------------------------------------------------------------------------------------------------------------------------------------------------------------------------------------------------------------------------------------------------------------------------------------------------------------------------------|
| 474 | <p>1v9yA<br/>(103)</p> <hr/> <p>1uguA<br/>(122)</p> | N | 14.56 | <p><b>TM-align:</b> aliSize=97 (resi) RMSD=2.07 (Å)<br/> g-----IFF-PALEQNMMGAVLINENDEVMFFNPAAEKLWYKREEVIGNNID--MLIPrdLRPA-HPEYIRHNRE-----RELQLEKKGSKIWTRFALSKVSAEgKvYLLALVRD-<br/> -vafgsedientlakMDdGQLDGLAFGAIQLDGDGNILQYNAAQGDITGRDPKQVIGKNFFkdVAPC--TDSPEFYGKFKEGVAsgnIntmFYYTFDYQM-TPTKVKVHMKKALS-G-D-SYVWFVKRv</p> <p><b>SARST:</b> aliSize=97 (resi) RMSD=5.09 (Å)<br/> gif-----FPALAEQNMMGAVLINENDEVMFFNPAAEKLWYKREEVIGNNI-----DMLIPRDLRPAHPEYIRHNRERELQLEKKGSKIWTRFALSKVSA--EGKVVYLLAL--vrd<br/> ---vafgsedientlakmdDGQLDGLAFGAIQLDGDGNILQYNAAQGDITGRDPKQVIGKNFFkdvaPCTDSPEFYGKFKEGVASGNLNTMFEYTFDYQMTPTKVKVHMKKALS-GDSYVWFVKRv---</p> <p><b>BLAST:</b> aliSize=26 (resi) iden=12.62% (13/103) simi=25.24% (26/103)<br/> giffpaieqnm-----GAVLINENDEVMFFNPAAEKLWYKREEVIGNNIDmliprdLRPA--HPEY-----i rhnre relqlekkdgskiwtrfalskvs aegkvyyllalvrd<br/> -----vafgsedientlakmdgdgldglafGAIQLDGDGNILQYNAAQGDITGRDPKQVIGKNFF----KDVAPCtdSPEFYgkfkegvasgnIntmfeytfdyqmtptkvkvhmkkalsgdsywfvkrv-----</p> <p><b>Proposed:</b> aliSize=99 (resi) RMSD=2.05 (Å)<br/> -----GT-FFP--ALEQNMMGAVLINENDEVMFFNPAAEKLWYKREEVIGNNID-MLIPrdLRPA-HPEYIRHNRE-----RELQLEKKGSKIWTRFALSKVSAegKVYLLALVRD-h<br/> vafgsedientLaKMDdGQLDGLAFGAIQLDGDGNILQYNAAQGDITGRDPKQVIGKNFFkdVAPC-TDSPEFYGKFKEGVAsgnIntmFYYTFDYQM-TPTKVKVHMKKALS--GDSYVWFVKRv-</p>                |
| 475 | <p>1v9yA<br/>(103)</p> <hr/> <p>2d01A<br/>(124)</p> | N | 15.53 | <p><b>TM-align:</b> aliSize=97 (resi) RMSD=2.07 (Å)<br/> g-----IFF-PALEQNMMGAVLINENDEVMFFNPAAEKLWYKREEVIGNNID--MLIPrdLRPA-HPEYIRHNRE-----RELQLEKKGSKIWTRFALSKVSAEgKvYLLALVRD-<br/> -ehvafgsedientlakMDdGQLDGLAFGAIQLDGDGNILQYNAAQGDITGRDPKQVIGKNFFkdVAPC--TDSPEFYGKFKEGVAsgnIntmFYYTFDYQM-TPTKVKVHMKKALS-G-D-SYVWFVKRv</p> <p><b>SARST:</b> aliSize=95 (resi) RMSD=4.91 (Å)<br/> gif-----FPALAEQNMMGAVLINENDEVMFFNPAAEKLWYKREEVIGNNI-----DMLIPRDLrpAHPEYIRHNRERELQLEKKGSKIWTRFALSKVSAEGKVYLLAL--vrd<br/> ---ehvafgsedientlakmdDGQLDGLAFGAIQLDGDGNILQYNAAQGDITGRDPKQVIGKNFFkdvaPCTDSPEFYGKFKEGVASGNLNTMFEYTFDYQMTPTKVKVHMKKALS-GDSYVWFVKRv---</p> <p><b>BLAST:</b> aliSize=26 (resi) iden=12.62% (13/103) simi=25.24% (26/103)<br/> giffpaieqnm-----GAVLINENDEVMFFNPAAEKLWYKREEVIGNNIDmliprdLRPA--HPEY-----i rhnre relqlekkdgskiwtrfalskvs aegkvyyllalvrd<br/> -----ehvafgsedientlakmdgdgldglafGAIQLDGDGNILQYNAAQGDITGRDPKQVIGKNFF----KDVAPCtdSPEFYgkfkegvasgnIntmfeytfdyqmtptkvkvhmkkalsgdsywfvkrv-----</p> <p><b>Proposed:</b> aliSize=99 (resi) RMSD=1.99 (Å)<br/> -----GTFPPA-----LEQNMMGAVLINENDEVMFFNPAAEKLWYKREEVIGNNID-MLIPrdLRPA-HPEYIRHNRE-----RELQLEKKGSKIWTRFALSKVSAegKVYLLALVRD-h<br/> ehvafgsedientLaKMDdGQLDGLAFGAIQLDGDGNILQYNAAQGDITGRDPKQVIGKNFFkdVAPC-TDSPEFYGKFKEGVAsgnIntmFYYTFDYQM-TPTKVKVHMKKALS--GDSYVWFVKRv-</p>         |
| 476 | <p>1v9yA<br/>(103)</p> <hr/> <p>2qj7A<br/>(123)</p> | N | 15.53 | <p><b>TM-align:</b> aliSize=97 (resi) RMSD=2.12 (Å)<br/> g-----IFF-PALEQNMMGAVLINENDEVMFFNPAAEKLWYKREEVIGNNID--MLIPrdLRPA-HPEYIRHNRE-----RELQLEKKGSKIWTRFALSKVSAEgKvYLLALVRD-<br/> -hvafgsedientlakMDdGQLDGLAFGAIQLDGDGNILQYNAAQGDITGRDPKQVIGKNFFkdVAPC--TDSPEFYGKFKEGVAsgnIntmFYYTFDYQM-TPTKVKVHMKKALS-G-D-SYVWFVKRv</p> <p><b>SARST:</b> aliSize=86 (resi) RMSD=13.33 (Å)<br/> gif-----FPALAEQNMMGAVLINENDEVMFFNPAAEKLWYKREEVIGNNI-----DMLIPRDLRPAHPEYIRHNRERELQLEKKGSKIWTRFALSKVSAEGKVYLLALV-----rd<br/> ---hvafgsedientlakmdDGQLDGLAFGAIQLDGDGNILQYNAAQGDITGRDPKQVIGKNFFkdvaPCTDSPEFYGKFKEGV-----ASGNLNTMFEYTFDYQMTPTKVKVHMKKALS-GDSYVWFVKRv---</p> <p><b>BLAST:</b> aliSize=26 (resi) iden=12.62% (13/103) simi=25.24% (26/103)<br/> giffpaieqnm-----GAVLINENDEVMFFNPAAEKLWYKREEVIGNNIDmliprdLRPA--HPEY-----i rhnre relqlekkdgskiwtrfalskvs aegkvyyllalvrd<br/> -----hvafgsedientlakmdgdgldglafGAIQLDGDGNILQYNAAQGDITGRDPKQVIGKNFF----KDVAPCtdSPEFYgkfkegvasgnIntmfeytfdyqmtptkvkvhmkkalsgdsywfvkrv-----</p> <p><b>Proposed:</b> aliSize=99 (resi) RMSD=2.14 (Å)<br/> -G-----IFF--P-----ALEQNMMGAVLINENDEVMFFNPAAEKLWYKREEVIGNNID-MLIPrdLRPA-HPEYIRHNRE-----RELQLEKKGSKIWTRFALSKVSAegKVYLLALVRD-h<br/> hvafgsedientLaKMDdGQLDGLAFGAIQLDGDGNILQYNAAQGDITGRDPKQVIGKNFFkdVAPC-TDSPEFYGKFKEGVAsgnIntmFYYTFDYQM-TPTKVKVHMKKALS--GDSYVWFVKRv-</p> |

|     |                                       |   |       |                                                                                                                                                                                                                                                                                                                                                                                                                                                                                                                                                                                                                                                                                                                                                                                                                                                                                                                                                                                                                                                                                                                                                                                                                                                                                                                                                                                                                                                                                                                                                                                                                                                                                                                                                                       |
|-----|---------------------------------------|---|-------|-----------------------------------------------------------------------------------------------------------------------------------------------------------------------------------------------------------------------------------------------------------------------------------------------------------------------------------------------------------------------------------------------------------------------------------------------------------------------------------------------------------------------------------------------------------------------------------------------------------------------------------------------------------------------------------------------------------------------------------------------------------------------------------------------------------------------------------------------------------------------------------------------------------------------------------------------------------------------------------------------------------------------------------------------------------------------------------------------------------------------------------------------------------------------------------------------------------------------------------------------------------------------------------------------------------------------------------------------------------------------------------------------------------------------------------------------------------------------------------------------------------------------------------------------------------------------------------------------------------------------------------------------------------------------------------------------------------------------------------------------------------------------|
| 477 | <p>1v9yA (103)</p> <p>3phyA (125)</p> | N | 15.53 | <p><b>TM-align:</b> aliSize=96 (resi) RMSD=2.48 (Å)<br/> g-----IF---FP--AEQNMMGAVLINENDEVMFFNPAEKLWYKREEVIGNNI-D-MLIPrdLRPA-HPeY-IRHNRE-----RQLQLEKKDGSKIWTRFALSIVSAEgKvYLLALVRD-<br/> -mehvafgsedientlAkMddgQLDGLAFGAIQLDGDGNILQYNAEGDITGRDPKQVIGKNFfKdVAPC--TDSPeFY-GkFKEGVAsgnlntmFYTFDY-QMTPTKVKVHMKKALSg-D-SWVFKRv</p> <p><b>SARST:</b> aliSize=60 (resi) RMSD=10.93 (Å)<br/> giffpaIe-----QNMMAVLIENDEVMFFNPA-----EKLWYKreevignnidmliprdlrpahpeyirhrnRELOLEKKDGSKIWRFALSIVSA-----EGKVVYLLAL--vrd<br/> -----mehvafgsedientlAkMddgQLDGLAFGAIQLDGDGNILQYNAEGDITGRDPKQVIGKNFfKdVAPC--TDSPeFYGkFKEGVAsgnlntmFYTFDY-QMTPTKVKVHMKKALSgDSYVWVFKrv---</p> <p><b>BLAST:</b> aliSize=26 (resi) iden=12.62% (13/103) simi=25.24% (26/103)<br/> giffpaIeqnm-----GAVLINENDEVMFFNPAEKLWYKREEVIGNNIDmliprdLRPA--HPEY-----irhnrelqlekkdgskiwtrfalskvsaegekvyllalvrd<br/> -----mehvafgsedientlAkMddgQLDGLAFGAIQLDGDGNILQYNAEGDITGRDPKQVIGKNFfKdVAPC--TDSPeFYGkFKEGVAsgnlntmFYTFDY-QMTPTKVKVHMKKALSgdsywwfvkrv-----</p> <p><b>Proposed:</b> aliSize=99 (resi) RMSD=2.29 (Å)<br/> -----G-IFPPA-----AEQNMMGAVLINENDEVMFFNPAEKLWYKREEVIGNNID-MLIPrdLRPA-HPeYIRHNRE-----RQLQLEKKDGSKIWTRFALSIVSAEgKvYLLALVRD-h<br/> mehvafgsEdIENTLAKMDDGQLDGLAFGAIQLDGDGNILQYNAEGDITGRDPKQVIGKNFfKdVAPC--TDSPeFYGkFKEGVAsgnlntmFYTFDY-QMTPTKVKVHMKKALSg-D-SWVFKRv-</p>                                                                                                                                                                                                                                                                                                                                                                                                                                |
| 478 | <p>1wk4A (174)</p> <p>1s3zB (145)</p> | C | 16.55 | <p><b>TM-align:</b> aliSize=137 (resi) RMSD=1.99 (Å)<br/> VRIRRAGLEDIPGVARVLVDtWratyrgvveafLeLSYEGOAEERWAORIKTptWPGRLFVAESESFEVVGFVAFGPD-RASG-FPGY-TAEIWAIVYVLPWORKLGRALFHEGARLLOAEYGR-LVWVLKENPKGRGFYEHGGVLLGERFIElggaklwevaygfdlgghk-----<br/> MDIRQMNKTHIEHWRGLRKQL-----P-CHPDDAHLADGEEILQA--DHLASFIAMAD-GVAIGFADASIRhDYVNgCDSSpVVFEGIFVLPFSFRQRVAKQIAAVQWGTNKCCEMASDTSPENTISQKVHQAIGFEETERVIFyrkr-----rkr</p> <p><b>SARST:</b> aliSize=136 (resi) RMSD=3.06 (Å)<br/> v-RIIRAGLEDIPGVARVLVDtWratyrgvveafLeLSYEGOAEERWAORIKTPTWpGRFVAESESFEVVGFVAFGPDRAsgFPYTAE----WAIYVLPWORKLGRALFHEGARLLOAEYGR-LVWVLKENPKGRGFYEHGGVLLGERFIElggaklwevaygfdlgghk<br/> -mDIRQMNKTHIEHWRGLRKQL-----WP---CHPDDAHLADGEEILQADHL--ASFIAMAD-GVAIGFADASIRHD-YVNgCDSSpVVFEGIFVLPFSFRQRVAKQIAAVQWGTNKCCEMASDTSPENTISQKVHQAIGFEETERVIFyrkr-----rkr</p> <p><b>BLAST:</b> aliSize=40 (resi) iden=14.48% (21/145) simi=27.59% (40/145)<br/> vrirragledlpgvarvlvdtwratyrgvveafleglsyegqaerwaqrktpwpgrl-----FVAESESFEVVGFVAFGPD-RASG-FPGY-TAEIWAIVYVLPWORKLGRALFHEGARLLOAEYGR-LVWVLKENPKGRGFYEHGGVLLGERFIElggaklwevaygfdlgghk<br/> -----mdirqmknthlehwgrlkrqlwpghpdahladgeeilqadhlafIAMAD-GVAIGFADASIRhDYVNgCDSSpVVFEGIFVLPFSFRQRVAKQIAAVQWGTNKCCEMASDTSPENTISQKVHQAIGFEETERVIFyrkr-----rkr</p> <p><b>Proposed:</b> aliSize=142 (resi) RMSD=1.85 (Å)<br/> VRIRRAGLEDIPGVARVLVDtWratyrgvveafLeLSYEGOAEERWAORIKTptWPGRLFVAESESFEVVGFVAFGPD-RASG-FPGY-TAEIWAIVYVLPWORKLGRALFHEGARLLOAEYGR-LVWVLKENPKGRGFYEHGGVLLGERFIElggaklwevaygfdlgghk<br/> MDIRQMNKTHIEHWRGLRKQL-----G--HPDDAHLADGEEILQA--DHLASFIAMAD-GVAIGFADASIRhDYVNgCDSSpVVFEGIFVLPFSFRQRVAKQIAAVQWGTNKCCEMASDTSPENTISQKVHQAIGFEETERVIFyrkr-----rkr</p>                                                                                       |
| 479 | <p>1wk4A (174)</p> <p>1ufhA (155)</p> | C | 10.32 | <p><b>TM-align:</b> aliSize=142 (resi) RMSD=3.86 (Å)<br/> VRI-RRAGLEDIPGVARVLVDtWra-TYRGV---PEA-FLEGLSye-GOAEERWAORIKTptWPGRLFVAESESFEVVGFVAFGPD-RASG-FPGY-TAEIWAIVYVLPWORKLGRALFHEGARLLOAEYGR-LVWVLKENPKGRGFYEHGGVLLGERFIElggaklwevaygfdlgghk--<br/> TIMTPMQTEFRSYLTYTKHYAEKVKAGTWLPEDAQLLSK--qVFTDLLPRGLEI--PHHHLWSLKLNEKDIVGWLWIHAE-----pehQQEAFIYDFGLYEPYRGGYAKQALALDQAARSMIRKLSLHVFAHNQTARKLYEQTQFQETDVMMSKkl-----sk-----kl</p> <p><b>SARST:</b> aliSize=135 (resi) RMSD=5.30 (Å)<br/> vrirrag-----LEDIPGVARVLVDtWratyrgvveafLeLSYEGOAEERWAORIKTPTWpGRFVAESESFEVVGFVAFGPDRA--SGFpgytELWAIYVLPWORKLGRALFHEGARLLOAEYGR-LVWVLKENPKGRGFYEHGGVLLGERFIElggaklwevaygfdlgghk<br/> -----timltpmqteeFRSYLTYTKHYAEKVKAGTWLPEDA---QLLSKQVFTDL--LRgletPHHHLWSLKLNEKDIVGWLWIHAEPEhpQE---AFIYDFGLYEPYRGGYAKQALALDQAARSMIRKLSLHVFAHNQTARKLYEQTQFQETDVMMSKkl-----sk-----kl</p> <p><b>BLAST:</b> aliSize=24 (resi) iden=9.68% (15/155) simi=15.48% (24/155)<br/> vrirragledlpgvarvlvdtwratyrgvveafleglsyegqaerwaqrktpwpgrlfvaesesevvgfaafgpdrasgfpgytaelwaiyvlpwqrkglgralfh-----GARRLLOAEYGR-LVWVLKENPKGRGFYEHGGVLLGERFIElggaklwevaygfdlgghk<br/> -----timltpmqteeFRSYLTYTKHYAEKVKAGTWLPEDAQLLSKQVFTDL--LRgletPHHHLWSLKLNEKDIVGWLWIHAEPEhpQE---AFIYDFGLYEPYRGGYAKQALALDQAARSMIRKLSLHVFAHNQTARKLYEQTQFQETDVMMSKkl-----sk-----kl</p> <p><b>Proposed:</b> aliSize=137 (resi) RMSD=2.96 (Å)<br/> v-RI-RRAGLEDIPGVARVLVDtWra-TYRGV---PEAFLEG-LS--yegQaeR--WAORIKTptWPGRLFVAE---SESgeVVGFAAFGP---D-rasgfpGYTELWAIYVLPWORKLGRALFHEGARLLOAEYGR-LVWVLKENPKGRGFYEHGGVLLGERFIElggaklwevaygfdlgghk<br/> -tIMTPMQTEFRSYLTYTKHYAE---EKVKAGTWLPEDAQLLSKQV---F--TdlPRGLEI--PHHHLWSLKLNEKDIVGWLWIHAEPEhp-----QQEAFIYDFGLYEPYRGGYAKQALALDQAARSMIRKLSLHVFAHNQTARKLYEQTQFQETDVMMSKkl-----sk-----kl</p> |



|     |                |   |       |                                                                                                                                                                                                                                                                                                                                                                                                                                                                                                                                                                                                                                                                                                                                                                                                                                                                                                                                                                                                                                                                                                                                                                                                                                                                                                                                                                                                                                                                                                                                                                                                                                                                                                                                                                                                                                                                                                                                 |
|-----|----------------|---|-------|---------------------------------------------------------------------------------------------------------------------------------------------------------------------------------------------------------------------------------------------------------------------------------------------------------------------------------------------------------------------------------------------------------------------------------------------------------------------------------------------------------------------------------------------------------------------------------------------------------------------------------------------------------------------------------------------------------------------------------------------------------------------------------------------------------------------------------------------------------------------------------------------------------------------------------------------------------------------------------------------------------------------------------------------------------------------------------------------------------------------------------------------------------------------------------------------------------------------------------------------------------------------------------------------------------------------------------------------------------------------------------------------------------------------------------------------------------------------------------------------------------------------------------------------------------------------------------------------------------------------------------------------------------------------------------------------------------------------------------------------------------------------------------------------------------------------------------------------------------------------------------------------------------------------------------|
| 480 | 1wk4A<br>(174) | C | 16.92 | <p><b>TM-align:</b> aliSize=124 (resi) RMSD=2.89 (Å)<br/> VRIRRAGLELPGVARVLDtwratYRgVvPeaflegLSyEGOARWAORLkTPTWPGRFLVFAESesGfVVGFAAFGPDRAsgf-PGYTAELWAIVLPTwOrkGLGRAIFHEGARLLOAEYGR-LVWVWLNPKGRGFYEHLCGV-L-GEREIElGGakIwevaygfdlgghkw-<br/> MRFRPFTEEDLDRNLKLAG-----K--R-P--VSLGALRFFA---RTGHSFLAEEG-E-PMGFALAQAVW--Q-gEATVVLVTRIEGR---SV-EALRGLRAVVKSAIDAVYEvALHLDPEERkeLEALKAEFAIGpVLAVRVLGS-----r</p> <p><b>SARST:</b> aliSize=121 (resi) RMSD=5.34 (Å)<br/> v--RIRRAGLELPGVARVLDtwratYRgVvPeaflegLSyEGOARWAORLkTPTWPGRFLVFAESesGfVVGFAAFGPDRAsgf-PGYTAELWAIVLPTwOrkGLGRAIFHEGARLLOAEYGR-LVWVWLNPKGRGFYEHLCGV-L-GEREIElGGakIwevaygfdlgghkw<br/> -mMRFRPFTEEDLDRNLKLAG-----LA--KR-----VSLGALRFFART-----GHSFLAEEG-E-PMGFALAQAVWQ--EATT-VLVTRIEGRSVE-----ALRGLRAVVKSAIDAVYEvALHLDPEERkeLEALKAEFAIGpVLAVRVLGS-----r</p> <p><b>BLAST:</b> aliSize=35 (resi) iden=20.00% (26/130) simi=26.92% (35/130)<br/> vriirragledlpgvarvlvtwratyrgvpeafleg-----SYEGOARWAORLkTPTWPGRFLVFAESesGfVVGFAAFGPDRAsgf-PGYTAELWAIVLPTwOrkGLGRAIFHEGARLLOAEYGR-LVWVWLNPKGRGFYEHLCGV-L-GEREIElGGakIwevaygfdlgghkw<br/> -----mrfrpfteedldrnlr lagkrpvs lgal rffartghsf LAECEE-PMGFALAQAVWQ--EATT-VLVTRIEGRSVE---ALRGLRAVVKSAIDAVYEvALHLDPEERkeLEALKAEFAIGpVLAVRVLGS-----lqaegyrlvwlkenpk<br/> grgyehlpgvllgereieIlggakiwevaygfdlgghkw</p> <p><b>Proposed:</b> aliSize=123 (resi) RMSD=2.25 (Å)<br/> VRIRRAGLELPGVARVLDtwratYRgVvPeaflegLSyEGOARWAORLkTPTWPGRFLVFAESesGfVVGFAAFGPDRAsgf-PGYTAELWAIVLPTwOrkGLGRAIFHEGARLLOAEYGR-LVWVWLNPKGRGFYEHLCGV-L-GEREIElGGakIwevaygfdlgghkw<br/> MRFRPFTEEDLDRNLKLAG-----K--RP--VSLGALRFFA---RTGHSFLAEEG-E-PMGFALAQAVW----QgeATVVLVTRIEGR---SV-EALRGLRAVVKSAIDAVYEvALHLDPEERkeLEALKAEFAIGpVLAVRVLGS-----RVLGSR-----</p>                                                                                                                                                                                              |
| 481 | 1wk4A<br>(174) | C | 14.97 | <p><b>TM-align:</b> aliSize=142 (resi) RMSD=2.47 (Å)<br/> VRIRRAGLELPGVARVLDtwratYRgVvPeaflegLSyEGOARWAORLkTPTWPGRFLVFAESesGfVVGFAAFGPDRAsgf-PGYTAELWAIVLPTwOrkGLGRAIFHEGARLLOAEYGR-LVWVWLNPKGRGFYEHLCGV-L-GEREIElGGakIwevaygfdlgghkw-<br/> kFVIRPATAACSDILRLIKELAK-YE--YME--E--QVI--LLEKDLLEDGFGHPFYHCLVAEVpkEHWtpeghSIVGFAMYFTY--DPWIGKLLYEDFFMSDYRGFIISEILKNSQVAMRCRCSsmHFLAEWNEPSINEKRRASDLSseeGwrlfkikeyl kmat-----idk<br/> -----<br/> eyllkmat</p> <p><b>SARST:</b> aliSize=130 (resi) RMSD=3.93 (Å)<br/> v--RIRRAGLELPGVARVLDtwratYRgVvPeaflegLSyEGOARWAORLkTPTWPGRFLVFAESesGfVVGFAAFGPDRAsgf-PGYTAELWAIVLPTwOrkGLGRAIFHEGARLLOAEYGR-LVWVWLNPKGRGFYEHLCGV-L-GEREIElGGakIwevaygfdlgghkw<br/> -kfVIRPATAACSDILRLIKELAK-YE--YME--E--QVI--LLEKDLLEDGFGHPFYHCLVAEVpkEHWtpeghSIVGFAMYFTY--DPWIGKLLYEDFFMSDYRGFIISEILKNSQVAMRCRCSsmHFLAEWNEPSINEKRRASDLSseeGwrlfkikeyl kmat-----lgerieie<br/> Ilggakiwevaygfdlgghkw</p> <p><b>BLAST:</b> aliSize=56 (resi) iden=17.96% (30/167) simi=33.53% (56/167)<br/> vriirragledlpgvarvlvtwratyrgvpeafleg-----SYEGOARWAORLkTPTWPGRFLVFAESesGfVVGFAAFGPDRAsgf-PGYTAELWAIVLPTwOrkGLGRAIFHEGARLLOAEYGR-LVWVWLNPKGRGFYEHLCGV-L-GEREIElGGakIwevaygfdlgghkw<br/> --kfvirpataacsdilrlikelak-ye--yme--e--qvi--llekdll ledgfg hppfy hclvaevpk ehwtpegh s ivgf amyfty dpwi --- gk lly edff msdyrgf ii seil knl sqv amrcrcs sm hfl vae w ne ps in e krr a sd ls see g wrl f ki key l kmat ----- l gg h kw</p> <p><b>Proposed:</b> aliSize=152 (resi) RMSD=2.17 (Å)<br/> VRIRRAGLELPGVARVLDtwratYRgVvPeaflegLSyEGOARWAORLkTPTWPGRFLVFAESesGfVVGFAAFGPDRAsgf-PGYTAELWAIVLPTwOrkGLGRAIFHEGARLLOAEYGR-LVWVWLNPKGRGFYEHLCGV-L-GEREIElGGakIwevaygfdlgghkw<br/> kFVIRPATAACSDILRLIKELAK-YE--YME--E--QVI--LLEKDLLEDGFGHPFYHCLVAEVpkEHWtpeghSIVGFAMYFTY--DPWIGKLLYEDFFMSDYRGFIISEILKNSQVAMRCRCSsmHFLAEWNEPSINEKRRASDLSseeGwrlfkikeyl kmat-----lgerieie<br/> Ilggakiwevaygfdlgghkw</p>                          |
| 482 | 1wk4A<br>(174) | C | 24.10 | <p><b>TM-align:</b> aliSize=141 (resi) RMSD=2.54 (Å)<br/> VRIRRAGLELPGVARVLDtwratYRgVvPeaflegLSyEGOARWAORLkTPTWPGRFLVFAESesGfVVGFAAFGPDRAsgf-PGYTAELWAIVLPTwOrkGLGRAIFHEGARLLOAEYGR-LVWVWLNPKGRGFYEHLCGV-L-GEREIElGGakIwevaygfdlgghkw-<br/> enlyfghmtLEIRPVPAAEQILAFIIEAD-LAD-YE--A---RHEVV--TDVEGIRRSIFAEG-SPTALMCLSE--RPIIYAVFYSY--STWLGgrNGIYEDLYTIEYRGVAGRRRLRELAEAVANDCRLEWSDWNQPAIDYRSIGALPQDewvryrldgealrkmae-----ldg<br/> -----<br/> ealrkmae</p> <p><b>SARST:</b> aliSize=133 (resi) RMSD=3.59 (Å)<br/> v--RIRRAGLELPGVARVLDtwratYRgVvPeaflegLSyEGOARWAORLkTPTWPGRFLVFAESesGfVVGFAAFGPDRAsgf-PGYTAELWAIVLPTwOrkGLGRAIFHEGARLLOAEYGR-LVWVWLNPKGRGFYEHLCGV-L-GEREIElGGakIwevaygfdlgghkw<br/> -enlyfghmtLEIRPVPAAEQILAFIIEAD-LAD-YE--A---RHEVV--TDVEGIRRSIFAEG-SPTALMCLSE--RPIIYAVFYSY--STWLGgrNGIYEDLYTIEYRGVAGRRRLRELAEAVANDCRLEWSDWNQPAIDYRSIGALPQDewvryrldgealrkmae-----lgerieie<br/> klwevaygfdlgghkw</p> <p><b>BLAST:</b> aliSize=47 (resi) iden=21.08% (35/166) simi=28.31% (47/166)<br/> vriirragledlpgvarvlvtwratyrgvpeafleglsyegqaerwaorktptwgrflvfaesessgfvvgfaafgpdraSGFPYTAELWAIVLPTWOrkGLGRAIFHEGARLLOAEYGR-LVWVWLNPKGRGFYEHLCGV-L-GEREIElGGakIwevaygfdlgghkw<br/> -----enlyfghmtleirpavpadaeqilafiieladyerarhevvtvegirrsifaegsPTALMCLSE--RPIIYAVFYSYSTWLGgrNGIYEDLYTIEYRGVAGRRRLRELAEAVANDCRLEWSDWNQPAIDYRSIGALPQDewvryrldgealrkmae-----lgerieie<br/> PKGRGFYEHLCGVLLGE-REIElGGakIwevaygfdlgghkw<br/> QPAIDYRSIGALPQDewvryrldgealrkmae-----</p> <p><b>Proposed:</b> aliSize=148 (resi) RMSD=2.13 (Å)<br/> VRIRRAGLELPGVARVLDtwratYRgVvPeaflegLSyEGOARWAORLkTPTWPGRFLVFAESesGfVVGFAAFGPDRAsgf-PGYTAELWAIVLPTwOrkGLGRAIFHEGARLLOAEYGR-LVWVWLNPKGRGFYEHLCGV-L-GEREIElGGakIwevaygfdlgghkw<br/> enlyfghmtLEIRPVPAAEQILAFIIEAD-LAD-YE--A---RHEVV--TDVEGIRRSIFAEG-SPTALMCLSE--RPIIYAVFYSY--STWLGgrNGIYEDLYTIEYRGVAGRRRLRELAEAVANDCRLEWSDWNQPAIDYRSIGALPQDewvryrldgealrkmae-----lgerieie<br/> klwevaygfdlgghkw</p> |
|     | 2f7B<br>(166)  |   |       |                                                                                                                                                                                                                                                                                                                                                                                                                                                                                                                                                                                                                                                                                                                                                                                                                                                                                                                                                                                                                                                                                                                                                                                                                                                                                                                                                                                                                                                                                                                                                                                                                                                                                                                                                                                                                                                                                                                                 |

|     |                                |   |                                                                                                                                                                                                                                                                                                                                                                                                                                                                                                                                                                                                                                                                                                                                                                                                                                                                                                                                                                                                                                                                                                                                                                                                                                                                                                                                                                                                                                                                                                                                                                                                                                                                                                                                                                                                                                                                                                                                                  |
|-----|--------------------------------|---|--------------------------------------------------------------------------------------------------------------------------------------------------------------------------------------------------------------------------------------------------------------------------------------------------------------------------------------------------------------------------------------------------------------------------------------------------------------------------------------------------------------------------------------------------------------------------------------------------------------------------------------------------------------------------------------------------------------------------------------------------------------------------------------------------------------------------------------------------------------------------------------------------------------------------------------------------------------------------------------------------------------------------------------------------------------------------------------------------------------------------------------------------------------------------------------------------------------------------------------------------------------------------------------------------------------------------------------------------------------------------------------------------------------------------------------------------------------------------------------------------------------------------------------------------------------------------------------------------------------------------------------------------------------------------------------------------------------------------------------------------------------------------------------------------------------------------------------------------------------------------------------------------------------------------------------------------|
| 483 | 1wk4A (174)<br><br>2g3tA (169) | C | 13.61<br><br><p><b>TM-align:</b> aliSize=142 (resi) RMSD=2.46 (Å)<br/> -VRTRRNGLELPGVARVLDVTRAtYRgvVPeaFleGLSYeGOAERWAORLKTPTWPGRFLVAESES--G-----EYVGFAAFgPDRasGFPG-YTAEIWAITYLPTWORKILRALFHEGARLLOAEGYGR-LVWVWLNPKGRGFYEHLGVLG-----EREIEIlggaklwevaygfdlgghkw---<br/> kFVLRPATAACSDILRLIKELAKY-EY--ME--E--QVI--LTEKDLEEDGFGEHPFYHCLVAEVPKehWtpeghSIVGFAMYFYTY--DPWIGKLLYEDFFVMSDYRGFITSEILKNLSQVAMRCRCSSmHFLAEWNEPSINFKRRASDLSscegWRLFK-----idk</p> <p>-----<br/> eyllkmatee</p> <p><b>SARST:</b> aliSize=133 (resi) RMSD=4.08 (Å)<br/> v--RTRRNGLELPGVARVLDVTRAtYRgvVPeaFleGLSYeGOAERWAORLKTPTWPGRFLVAESES--G-----EYVGFAAFgPDRasGFPG-YTAEIWAITYLPTWORKILRALFHEGARLLOAEGYGR-LVWVWLNPKGRGFYEHLGVLG-----EREIEIlggaklwevaygfdlgghkw<br/> -kfVLRPATAACSDILRLIKELAKY-EY--MEEQV-----I--TEKDLEEDGF-----GEHPFYHCLVAEVPKehWtpeghSIVGFAMYFYTYDPWIGKLYEDFFVMSDYRGFITSEILKNLSQVAMRCRCSSmHFLAEWNEPSINFKRRASDLSscegwrIfkidkeyllkmatee-----iereiel</p> <p><b>ggaklwevaygfdlgghkw</b></p> <p><b>BLAST:</b> aliSize=56 (resi) iden=17.75% (30/169) simi=33.14% (56/169)<br/> vr---RTRRNGLELPGVARVLDVTRAtYRgvVPeaFleGLSYeGOAERWAORLKTPTWPGRFLVAESES--G-----EYVGFAAFgPDRasGFPG-YTAEIWAITYLPTWORKILRALFHEGARLLOAEGYGR-LVWVWLNPKGRGFYEHLGVLG-----EREIEIlggaklwevaygfdlgghkw<br/> --kfVLRPATAACSDILRLIKELAKY-EY--MEEQV-----I--TEKDLEEDGF-----GEHPFYHCLVAEVPKehWtpeghSIVGFAMYFYTYDPWIGKLYEDFFVMSDYRGFITSEILKNLSQVAMRCRCSSmHFLAEWNEPSINFKRRASDLSscegwrIfkidkeyllkmatee-----idk</p> <p>fdlgghkw</p> <p><b>Proposed:</b> aliSize=154 (resi) RMSD=2.30 (Å)<br/> -VRTRRNGLELPGVARVLDVTRAtYRgvVPeaFleGLSYeGOAERWAORLKTPTWPGRFLVAESES--G-----EYVGFAAFgPDRasGF-PG-YTAEIWAITYLPTWORKILRALFHEGARLLOAEGYGR-LVWVWLNPKGRGFYEHLGVLG-----EREIEIlggaklwevaygfdlgghkw<br/> kFVLRPATAACSDILRLIKELAKY-EY--M--E--QVI--LTEKDLEEDGFGEHPFYHCLVAEVPKehWtpeghSIVGFAMYFYTY--DpWIGKLLYEDFFVMSDYRGFITSEILKNLSQVAMRCRCSSmHFLAEWNEPSINFKRRASDLS---S--EEGWRLFKIDkeyLLkMA--TEE</p>                     |
| 484 | 1wk4A (174)<br><br>2g3tB (168) | C | 13.69<br><br><p><b>TM-align:</b> aliSize=142 (resi) RMSD=2.41 (Å)<br/> -VRTRRNGLELPGVARVLDVTRAtYRgvVPeaFleGLSYeGOAERWAORLKTPTWPGRFLVAESES--G-----EYVGFAAFgPDRasGFPG-YTAEIWAITYLPTWORKILRALFHEGARLLOAEGYGR-LVWVWLNPKGRGFYEHLGVLG-----EREIEIlggaklwevaygfdlgghkw---<br/> kFVLRPATAACSDILRLIKELAKY-EY--ME--E--QVI--LTEKDLEEDGFGEHPFYHCLVAEVPKehWtpeghSIVGFAMYFYTY--DPWIGKLLYEDFFVMSDYRGFITSEILKNLSQVAMRCRCSSmHFLAEWNEPSINFKRRASDLSscegWRLFK-----idk</p> <p>-----<br/> eyllkmate</p> <p><b>SARST:</b> aliSize=132 (resi) RMSD=4.06 (Å)<br/> v--RTRRNGLELPGVARVLDVTRAtYRgvVPeaFleGLSYeGOAERWAORLKTPTWPGRFLVAESES--G-----EYVGFAAFgPDRasGFPG-YTAEIWAITYLPTWORKILRALFHEGARLLOAEGYGR-LVWVWLNPKGRGFYEHLGVLG-----EREIEIlggaklwevaygfdlgghkw<br/> -kfVLRPATAACSDILRLIKELAKY-EY--MEEQV-----I--TEKDLEEDGF-----GEHPFYHCLVAEVPKehWtpeghSIVGFAMYFYTYDPWIGKLYEDFFVMSDYRGFITSEILKNLSQVAMRCRCSSmHFLAEWNEPSINFKRRASDLSscegwrIfkidkeyllkmatee-----iereiel</p> <p><b>ggaklwevaygfdlgghkw</b></p> <p><b>BLAST:</b> aliSize=56 (resi) iden=17.86% (30/168) simi=33.33% (56/168)<br/> vr---RTRRNGLELPGVARVLDVTRAtYRgvVPeaFleGLSYeGOAERWAORLKTPTWPGRFLVAESES--G-----EYVGFAAFgPDRasGFPG-YTAEIWAITYLPTWORKILRALFHEGARLLOAEGYGR-LVWVWLNPKGRGFYEHLGVLG-----EREIEIlggaklwevaygfdlgghkw<br/> --kfVLRPATAACSDILRLIKELAKY-EY--MEEQV-----I--TEKDLEEDGF-----GEHPFYHCLVAEVPKehWtpeghSIVGFAMYFYTYDPWIGKLYEDFFVMSDYRGFITSEILKNLSQVAMRCRCSSmHFLAEWNEPSINFKRRASDLSscegwrIfkidkeyllkmatee-----idk</p> <p>dlgghkw</p> <p><b>Proposed:</b> aliSize=152 (resi) RMSD=2.22 (Å)<br/> -VRTRRNGLELPGVARVLDVTRAtYRgvVPeaFleGLSYeGOAERWAORLKTPTW-pGRFLVAESES--G-----EYVGFAAFgPDRasGF-PG-YTAEIWAITYLPTWORKILRALFHEGARLLOAEGYGR-LVWVWLNPKGRGFYEHLGVLG-----EREIEIlggaklwevaygfdlgghkw<br/> kFVLRPATAACSDILRLIKELAKY-EY--M--E--QVI--LTEKDLEEDGFGEHPf-YHCLVAEVPKehWtpeghSIVGFAMYFYTY--DpWIGKLLYEDFFVMSDYRGFITSEILKNLSQVAMRCRCSSmHFLAEWNEPSINFKRRASDLS---S--EEGWRLFKIDkeyLLkMA--T-E</p>                     |
| 485 | 1wk4A (174)<br><br>2jevA (169) | C | 14.79<br><br><p><b>TM-align:</b> aliSize=142 (resi) RMSD=2.52 (Å)<br/> --VRTRRNGLELPGVARVLDVTRAtYRgvVPeaFleGLSYeGOAERWAORLKTPTWPGRFLVAESES--G-----EYVGFAAFgPDRasGFPG-YTAEIWAITYLPTWORKILRALFHEGARLLOAEGYGR-LVWVWLNPKGRGFYEHLGVLG-----EREIEIlggaklwevaygfdlgghkw--<br/> akFVLRPATAACSDILRLIKELAKY-EY--ME--E--QVI--LTEKDLEEDGFGEHPFYHCLVAEVPKehWtpeghSIVGFAMYFYTY--DPWIGKLLYEDFFVMSDYRGFITSEILKNLSQVAMRCRCSSmHFLAEWNEPSINFKRRASDLSscegWRLFK-----idk</p> <p>-----<br/> keyllkmate</p> <p><b>SARST:</b> aliSize=133 (resi) RMSD=4.93 (Å)<br/> v--RTRRNGLELPGVARVLDVTRAtYRgvVPeaFleGLSYeGOAERWAORLKTPTWPGRFLVAESES--G-----EYVGFAAFgPDRasGFPG-YTAEIWAITYLPTWORKILRALFHEGARLLOAEGYGR-LVWVWLNPKGRGFYEHLGVLG-----EREIEIlggaklwevaygfdlgghkw<br/> -akFVLRPATAACSDILRLIKELAKY-EY--MEEQV-----I--TEKDLEEDGF-----GEHPFYHCLVAEVPKehWtpeghSIVGFAMYFYTYDPWIGKLYLEDF-----FVMSDYRGFITSEILKNLSQVAMRCRCSSmHFLAEWNEPSINFKRRASDLSscegwrIfkidkeyllkmatee-----iereiel</p> <p><b>ggaklwevaygfdlgghkw</b></p> <p><b>BLAST:</b> aliSize=56 (resi) iden=17.75% (30/169) simi=33.14% (56/169)<br/> vr---RTRRNGLELPGVARVLDVTRAtYRgvVPeaFleGLSYeGOAERWAORLKTPTWPGRFLVAESES--G-----EYVGFAAFgPDRasGFPG-YTAEIWAITYLPTWORKILRALFHEGARLLOAEGYGR-LVWVWLNPKGRGFYEHLGVLG-----EREIEIlggaklwevaygfdlgghkw<br/> --akFVLRPATAACSDILRLIKELAKY-EY--MEEQV-----I--TEKDLEEDGF-----GEHPFYHCLVAEVPKehWtpeghSIVGFAMYFYTYDPWIGKLYLEDF-----FVMSDYRGFITSEILKNLSQVAMRCRCSSmHFLAEWNEPSINFKRRASDLSscegwrIfkidkeyllkmatee-----idk</p> <p>fdlgghkw</p> <p><b>Proposed:</b> aliSize=152 (resi) RMSD=2.21 (Å)<br/> --VRTRRNGLELPGVARVLDVTRAtYRgvVPeaFleGLSYeGOAERWAORLKTPTW-pGRFLVAESES--G-----EYVGFAAFgPDRasGF-PG-YTAEIWAITYLPTWORKILRALFHEGARLLOAEGYGR-LVWVWLNPKGRGFYEHLGVLG-----EREIEIlggaklwevaygfdlgghkw<br/> akFVLRPATAACSDILRLIKELAKY-EY--M--E--QVI--LTEKDLEEDGFGEHPf-YHCLVAEVPKehWtpeghSIVGFAMYFYTY--DpWIGKLLYEDFFVMSDYRGFITSEILKNLSQVAMRCRCSSmHFLAEWNEPSINFKRRASDLS---S-----EEGWRLFKID-KEYllkMate</p> |

|     |                                               |   |       |                                                                                                                                                                                                                                                                                                                                                                                                                                                                                                                                                                                                                                                                                                                                                                                                                                                                                                                                                                                                                                                                                                                                                                                                                                                                                                                                                                                                                                                                                                                                                                                                                              |
|-----|-----------------------------------------------|---|-------|------------------------------------------------------------------------------------------------------------------------------------------------------------------------------------------------------------------------------------------------------------------------------------------------------------------------------------------------------------------------------------------------------------------------------------------------------------------------------------------------------------------------------------------------------------------------------------------------------------------------------------------------------------------------------------------------------------------------------------------------------------------------------------------------------------------------------------------------------------------------------------------------------------------------------------------------------------------------------------------------------------------------------------------------------------------------------------------------------------------------------------------------------------------------------------------------------------------------------------------------------------------------------------------------------------------------------------------------------------------------------------------------------------------------------------------------------------------------------------------------------------------------------------------------------------------------------------------------------------------------------|
| 486 | <p>1wk4A<br/>(174)</p> <p>2vbqA<br/>(147)</p> | C | 17.01 | <p><b>TM-align:</b> aliSize=137 (resi) RMSD=2.14 (Å)<br/> --VRTFRAGLEDIPGVARVLVDIWratyrgvvpeafLeLSyEGQAERWAORLKTpWPGRLVVAESEsEVVGFPAFGPD-RASG-FPGY-TAEWAIYVLPWORKLGRAIFHEGARLLOAEYGR-LVWVLEPKGRGFYEHGCVLLGEREIEIggaklwevaygfdlgghkw----<br/> shMDIRQMNKTHIEHWRGLRKQLV-----P-HP-DDAHLADGEEILQA-DHLASFIAMAD-GVAIGFADASIRhDYVNgCDSSpVVFEGIFVLPFRQRQVAKQIAAVQWGTNKCRESASDTSPENTISQKVHQAIGFEETERVIFY-----rkrc</p> <p><b>SARST:</b> aliSize=136 (resi) RMSD=4.58 (Å)<br/> v---RFRAGLEDIPGVARVLVDIWratyrgvvPEAFlegLSyEGQAERWAORLKTPTWPGRLVVAESEsEVVGFPAFGPDRAsgFPYTAE----WAIYVLPWORKLGRAIFHEGARLLOAEYGR-LVWVLEPKGRGFYEHGCVLLGEREIEIggaklwevaygfdlgghkw<br/> -shMDIRQMNKTHIEHWRGLR-----KQLWPGHDDAH---LADGEI-----LQADHLASFIAMADGVAIGFADASIRHD-YVNCDSspvVfEGIFVLPFRQRQVAKQIAAVQWGTNKCRESASDTSPENTISQKVHQAIGFEETERVIFYRkr-----</p> <p><b>BLAST:</b> aliSize=40 (resi) iden=14.29% (21/147) simi=27.21% (40/147)<br/> vriirragledlpgvarvlvdtwratyrgvvpeafleglsyegqaerwaqrkktptwpgrl-----shmdirqmnkthlehwrglrkqlwpghpddahladgeeilqadhlasFVAESEsEVVGFPAFGPDRAsgFPYTAE----WAIYVLPWORKLGRAIFHEGARLLOAEYGR-LVWVLEPKGRGFYEHGCVLLGEREIEIggaklwevaygfdlgghkw<br/> -----gvlgereieIggaklwevaygfdlgghkw<br/> QALGfeetervifyrkr-----</p> <p><b>Proposed:</b> aliSize=142 (resi) RMSD=2.01 (Å)<br/> --VRTFRAGLEDIPGVARVLVDIWratyrgvvpeafLeLSyEGQAERWAORLKTpWPGRLVVAESEsEVVGFPAFGPD-RASG-FPGY-TAEWAIYVLPWORKLGRAIFHEGARLLOAEYGR-LVWVLEPKGRGFYEHGCVLLGEREIEIggaklwevaygfdlgghkw<br/> shMDIRQMNKTHIEHWRGLRKQLV-----P-HPDDAHLADGEEILQA---DHLASFIAMAD-GVAIGFADASIRhDYVNgCDSSpVVFEGIFVLPFRQRQVAKQIAAVQWGTNKCRESASDTSPENTISQKVHQAIGFEETERVIFYRKR-----KRC</p> |
| 487 | <p>1wk4A<br/>(174)</p> <p>2vbqB<br/>(144)</p> | C | 16.67 | <p><b>TM-align:</b> aliSize=136 (resi) RMSD=2.03 (Å)<br/> vRFRAGLEDIPGVARVLVDIWratyrgvvpeafLeLSyEGQAERWAORLKTpWPGRLVVAESEsEVVGFPAFGPD-RASG-FPGY-TAEWAIYVLPWORKLGRAIFHEGARLLOAEYGR-LVWVLEPKGRGFYEHGCVLLGEREIEIggaklwevaygfdlgghkw----<br/> -DIRQMNKTHIEHWRGLRKQLV-----P-HP-DDAHLADGEEILQA-DHLASFIAMAD-GVAIGFADASIRhDYVNgCDSSpVVFEGIFVLPFRQRQVAKQIAAVQWGTNKCRESASDTSPENTISQKVHQAIGFEETERVIFY-----rkrc</p> <p><b>SARST:</b> aliSize=135 (resi) RMSD=3.12 (Å)<br/> vRFRAGLEDIPGVARVLVDIWratyrgvvPEAFlegLSyEGQAERWAORLKTPTWPGRLVVAESEsEVVGFPAFGPDRAsgFPYTAE----WAIYVLPWORKLGRAIFHEGARLLOAEYGR-LVWVLEPKGRGFYEHGCVLLGEREIEIggaklwevaygfdlgghkw<br/> --dIRQMNKTHIEHWRGLRKQLV-----WPG---HPDDAHLADGEEILQADHL--ASFIAMAD-GVAIGFADASIRHD-YVNCDSspvVfEGIFVLPFRQRQVAKQIAAVQWGTNKCRESASDTSPENTISQKVHQAIGFEETERVIFYRkr-----</p> <p><b>BLAST:</b> aliSize=40 (resi) iden=14.58% (21/144) simi=27.78% (40/144)<br/> vriirragledlpgvarvlvdtwratyrgvvpeafleglsyegqaerwaqrkktptwpgrl-----diirqmnkthlehwrglrkqlwpghpddahladgeeilqadhlasFVAESEsEVVGFPAFGPDRAsgFPYTAE----WAIYVLPWORKLGRAIFHEGARLLOAEYGR-LVWVLEPKGRGFYEHGCVLLGEREIEIggaklwevaygfdlgghkw<br/> -----gvlgereieIggaklwevaygfdlgghkw<br/> feetervifyrkr-----</p> <p><b>Proposed:</b> aliSize=141 (resi) RMSD=1.86 (Å)<br/> vRFRAGLEDIPGVARVLVDIWratyrgvvpeafLeLSyEGQAERWAORLKTpWPGRLVVAESEsEVVGFPAFGPD-RASG-FPGYTA-EWAIYVLPWORKLGRAIFHEGARLLOAEYGR-LVWVLEPKGRGFYEHGCVLLGEREIEIggaklwevaygfdlgghkw<br/> -DIRQMNKTHIEHWRGLRKQLV-----G---HPDDAHLADGEEILQA---DHLASFIAMAD-GVAIGFADASIRhDYVNgCDSSpVVFEGIFVLPFRQRQVAKQIAAVQWGTNKCRESASDTSPENTISQKVHQAIGFEETERVIFYRKR-----</p>                      |
| 488 | <p>1wwaX<br/>(105)</p> <p>2dm2A<br/>(110)</p> | N | 18.10 | <p><b>TM-align:</b> aliSize=82 (resi) RMSD=2.37 (Å)<br/> vsfpasvqlhtavc-----MHHWCIPFSVDCQAFSLRFLFNGLSVLNE-TSFIETEFLEPaanevrHGCRRLNQPfHVNNNGNYLLAANFFQASASIMAAfMDNPFefn-----<br/> -----gssgsgapffemklkhykifegmpvtftcrVACNKKPKIYFKDKQISPKSDHYTIQRDL-----GTCSLHTTASLLDDGNYSIMAANPQRISCTGRMLVQAVNS--gpssg</p> <p><b>SARST:</b> aliSize=91 (resi) RMSD=13.32 (Å)<br/> vsf-----PASV---QLHTAVEMHHWCIPFSVDCQAFSLRFLFNGLSVLNE-TSFIETEFLEPaanevrHGCRRLNQPfHVNNNGNYLLAANFFQASASIMAA---FMDN----pfefn<br/> ---gssgsgAPPFemklkhykifegmpvtftcrVACNKKPKIYFKDKQISPKSDHYTIQRDL-----TCSLHTTASLLDDGNYSIMAANPQRISCTGRMLVqavNSgpssg-----</p> <p><b>BLAST:</b> aliSize=36 (resi) iden=20.95% (22/105) simi=34.29% (36/105)<br/> vsfpasvqlhtavemhhwcipfs-----VDCQAFSLRFLFNGLSVLNETSFIETEFLEPaanevrhgC-RRLNQPfHVNNNGNYLLAANFFQASAS-----imaafmdnPFefn<br/> -----gssgsgapffemklkhykifegmpvtftcrVACNKKPKIYFKDKQISPKSDHYTIQRDL-----GTCSLHTTASLLDDGNYSIMAANPQRISCTgrlmvqavnsgpsg-----</p> <p><b>Proposed:</b> aliSize=90 (resi) RMSD=1.94 (Å)<br/> v---SFP-ASVQ--LHTAVEMHHWCIPFSVDCQAFSLRFLFNGLSVLNE-TSFIETEFLEPaanevrHGCRRLNQPfHVNNNGNYLLAANFFQASASIMAAfMDN--P----fefn<br/> -gssGSSgAPPFemklkhykifegmp--VFTFTCRVACNKKPKIYFKDKQISPKSDHYTIQRDL-----GTCSLHTTASLLDDGNYSIMAANPQRISCTGRMLVQAVNSgpssg----</p>                                                                                                                                                                                                                                                                                                                                                    |

|     |                                               |   |       |                                                                                                                                                                                                                                                                                                                                                                                                                                                                                                                                                                                                                                                                                                                                                                                                                                                                                                                                                                                                                                                                                                                                                                                                                                                                                                                                                                                                                                                                                                                                                                                                                                                                                                                                                                                           |
|-----|-----------------------------------------------|---|-------|-------------------------------------------------------------------------------------------------------------------------------------------------------------------------------------------------------------------------------------------------------------------------------------------------------------------------------------------------------------------------------------------------------------------------------------------------------------------------------------------------------------------------------------------------------------------------------------------------------------------------------------------------------------------------------------------------------------------------------------------------------------------------------------------------------------------------------------------------------------------------------------------------------------------------------------------------------------------------------------------------------------------------------------------------------------------------------------------------------------------------------------------------------------------------------------------------------------------------------------------------------------------------------------------------------------------------------------------------------------------------------------------------------------------------------------------------------------------------------------------------------------------------------------------------------------------------------------------------------------------------------------------------------------------------------------------------------------------------------------------------------------------------------------------|
| 489 | <p>1wwaX<br/>(105)</p> <p>2i26O<br/>(117)</p> | N | 9.52  | <p><b>TM-align:</b> aliSize=82 (resi) RMSD=2.49 (Å)<br/> vsfpasvqlhtav-----MHHCIPFSVD--GQPAPSLRWLFN-----GVLNETSFIFTEFLPaanetVRHGCLRLNQP HVNNGNYTLAANP-----FG--Q-ASA-SIMAAfMDNPFefn---<br/> -----rvdqtpqtitketGESLTINCVLRdsNCALSSTY YRKKsgstnEESISKGGRYVETVNSG-----SKSFSLRINDLVEDSGTYRCKPESRygsydaeCAalNdQYGGTVVT-VNAAA---hhh</p> <p><b>SARST:</b> aliSize=78 (resi) RMSD=13.44 (Å)<br/> v---SFASVQLHTAVEMHHCIPF--VDGQPAPSLRWLFN-----SVLNETSFIFTEFLPaanetVRHGCLRLNQP HVNNGNYTLAANP-----pfgqasasimaa fmdn p f e f n<br/> -rvdQTQTITKETGESLTINCVLRdsNCALSSTY YRKKsgstnEESISKGGRYVETVN---SGSKSFSLRINDLVEDSGTYRCKPESRygsydaeCaalndqygggtvvtvnaaahhh-----</p> <p><b>BLAST:</b> aliSize=27 (resi) iden=17.14% (18/105) simi=25.71% (27/105)<br/> vsfpasvqlhtavemhwcipfsvdgqapapslrwlfn-----GVLNETSFIFTEFLPaanetVRHGCLRLNQP HVNNGNYTLAANPFGQASASIMAAfMDNPFefn-----npfefn<br/> -----rvdqtpqtitketgesltincvlrdsncalsstywyrrksgstnEESISKGGRYVETVNSGSKSFSLRINDLVEDSGTYRCKPESRygsydaeCaalNdQYGGTVVT-VNAAA---hhh-----</p> <p><b>Proposed:</b> aliSize=92 (resi) RMSD=2.18 (Å)<br/> vsfPAsVQ-LHTAVEMHHCIPFSV--DGQPAPSLRWLFN-----GVLNETSFIFTEFL-ePaanetVRHGCLRLNQP HVNNGNYTLAANP-----FG--Q-ASASIMAAfMDnPF----efn<br/> ---RVDQTpQTITKETGESLTINCVLRdsNCALSSTY YRKKsgstnEESISKGGRYVETVNs-G-----SKSFSLRINDLVEDSGTYRCKPESRygsydaeCAalNdQYGGTVVTN-AAahhh---</p>                                                                                                                                                                                                                                                                                                                                                                                                                                                 |
| 490 | <p>1wwaX<br/>(105)</p> <p>2i26P<br/>(114)</p> | N | 8.57  | <p><b>TM-align:</b> aliSize=74 (resi) RMSD=3.86 (Å)<br/> vsfpasvqlhta vem-----HHWCIPFSVDG-----Q-PAPSLRWLFnG--S--VLNETsf--IFTEFLPaANETVRHGCLRLNqPthvNNGNYTLAAN-----PFGQASASIMAAfMDNpfe fn<br/> -----rvdqtpqtitketGESLTINCVLRdsncalSsTYWYRKK--Sg--tnEESIS--kgGRYVET-VNSGSKSFSLRIND--L---TVEDSGTYRCKpes rygsydaeCaalNdQYGGTVVTN-AA-----</p> <p><b>SARST:</b> aliSize=78 (resi) RMSD=13.35 (Å)<br/> v---SFASVQLHT-AVEMHHCIPF--VDGQPAPSLRWLFN-----SVLNETSFIFTEFLPaanetvrHGCLRLNQP HVNNGNYTLAANP-----pfgqasasimaa fmdn p f e f n<br/> -rvdQTQTITKETGESLTINCVLRdsNCALSSTY YRKKsgstnEESISKGGRYVETVNSGSK-----SFSLRINDLVEDSGTYRCKPESRygsydaeCaalndqygggtvvtvnaaa-----</p> <p><b>BLAST:</b> aliSize=27 (resi) iden=17.14% (18/105) simi=25.71% (27/105)<br/> vsfpasvqlhta vemhwcipfsvdgqapapslrwlfn-----GVLNETSFIFTEFLPaanetVRHGCLRLNQP HVNNGNYTLAANPFGQASASIMAAfMDNPFefn-----npfefn<br/> -----rvdqtpqtitketgesltincvlrdsncalsstywyrrksgstnEESISKGGRYVETVNSGSKSFSLRINDLVEDSGTYRCKPESRygsydaeCaalNdQYGGTVVT-VNAAA-----</p> <p><b>Proposed:</b> aliSize=90 (resi) RMSD=2.23 (Å)<br/> vSFPAS-VQLHTAVem-hhWCIPFSV--DGQPAPSLRWLFN-----GVLNETSFIFTEFL-ePaanetVRHGCLRLNQP HVNNGNYTLAANP-----FG-Q-ASA-SIMAAfMDnPF-efn<br/> -RVDQTpQTITKET-Ges--LITINCVLRdsNCALSSTY YRKKsgstnEESISKGGRYVETVNs-G-----SKSFSLRINDLVEDSGTYRCKPESRygsydaeCAalNdQYGGTVVT-VN-AAa---</p>                                                                                                                                                                                                                                                                                                                                                                                                                                              |
| 491 | <p>1wwbX<br/>(103)</p> <p>lhngA<br/>(175)</p> | N | 10.68 | <p><b>TM-align:</b> aliSize=76 (resi) RMSD=2.45 (Å)<br/> vhfaptitflespts-----DHHWCIPF--TVKGNPKPALOWFYNGAILN-----E-SKYICTKHvtnhteyHFCOLDNPTHMNNDYTLIAKNEY-GK-DEKQISAHFMGwp-----Gid-----<br/> -----dsgtvwgalgGINLInpnFQMTDDIDEVRERGSTLVAefkrkmpfLkSGAFEILA-----NDKIKLNRDSDTYNVTYVYSTNgTriLNALDLRILE--mvs k p m i y e c s n a t l t c e v l e g T --d v e l k l y q g k e h l r s l r q k t m s y q w t n l r a p f c k a v n r v s</p> <p>-----<br/> qesemevvnpe</p> <p><b>SARST:</b> aliSize=81 (resi) RMSD=17.35 (Å)<br/> vhfaptitflespts-----DHHWCIPFTVKGNPKPALOWFY--NGAILN-SKYIC-TKTHVTHNTYHGC---OLDNPTHMNNDYTLIAKNEYGKDEKQISahfm<br/> -----dsgtvwgalgGINLInpnfQMTDDIDEVRERGSTlvaefkrkmpfLksgafeilangdikiknltrdsgtyntvystngtriLNKALDLRILEM-VSKPMIYWEcsNATLTCVLEGTdVELKLYQKHLRSrqtTMSYQWTNLRAPFKCKVNRVVSQSESEMEV-----</p> <p>GWPG-id<br/> VNCPe--</p> <p><b>BLAST:</b> aliSize=23 (resi) iden=10.68% (11/103) simi=22.33% (23/103)<br/> vhfaptitflesptsdhwcipftvkgnpkpa-----LOWFYNGAILN-SKYICTKHVTHNTY--HFCOLDNPTHMNNDYTLIAKNEY-----<br/> -----dsgtvwgalgGINLInpnfQMTDDIDEVRERGSTLVAefkrkmpfLkSGAFEILANDKIKLNRDSDTYNVTYVYSTNtrinkaldlrilemvs k p m i y e c s n a t l t c e v l e g t d v e l k l y q g k e h l r s l r q k t m s y q w t n l r a p f c k a</p> <p>-----kdekqisahfmwpggid<br/> vnrvsqesemevvnpe-----</p> <p><b>Proposed:</b> aliSize=84 (resi) RMSD=2.15 (Å)<br/> vhfaptitflesptsdhwcipf--TVKGNPKPALOWFYNGAILN-----E-SKYICTKHvtnhteyHFCOLDNPTHMNNDYTLIAKNEY-GK-DEKQISAHFMG-----w<br/> --DSGTV-WGA-LG--GINLInpnFQMTDDIDEVRERGSTLVAefkrkmpfLkSGAFEILA-----N-DKIKLNRDSDTYNVTYVYSTNgTriLNALDLRILEmvs k p m i y e c s n a t l t c e v l e g t d v e l k l y q g k e h l r s l r q k t m s y q w t n l r a p f c k a v n r v s q e s e m e v v n p e -<br/> pgid<br/> -----</p> |

|     |                                               |   |       |                                                                                                                                                                                                                                                                                                                                                                                                                                                                                                                                                                                                                                                                                                                                                                                                                                                                                                                                                                                                                                                                                                                                                                                                                                                                                                                                     |
|-----|-----------------------------------------------|---|-------|-------------------------------------------------------------------------------------------------------------------------------------------------------------------------------------------------------------------------------------------------------------------------------------------------------------------------------------------------------------------------------------------------------------------------------------------------------------------------------------------------------------------------------------------------------------------------------------------------------------------------------------------------------------------------------------------------------------------------------------------------------------------------------------------------------------------------------------------------------------------------------------------------------------------------------------------------------------------------------------------------------------------------------------------------------------------------------------------------------------------------------------------------------------------------------------------------------------------------------------------------------------------------------------------------------------------------------------|
| 492 | <p>1wwbX<br/>(103)</p> <p>lie5A<br/>(107)</p> | N | 13.59 | <p><b>TM-align:</b> aliSize=78 (resi) RMSD=2.40 (Å)<br/> vhfaptitflespt-----SDHWCIPFTVKGNPKPALQWFYNGAILN---ESKYICTKIhvtnthtEYHGCQLDNPHTMNGDYTLIAKNEYKDEKQISAHfMGWpGid<br/> -----gkdiqivnvppsvrarqstmnatanLSQSVTLACDADCFPEPTMTITKDEPIEQEDNEEKYSFNY-----DGSELIKKVDKSDEAEICIAENKAGEODATHLK-VFA-K--</p> <p><b>SARST:</b> aliSize=78 (resi) RMSD=16.18 (Å)<br/> vhfaptit-----FLESPTSDHWCIPFTVKGNPKPALQWFYNGAILNesKYIctkihvTNHTEYHGC---QLDNPHTMNGDYTLIAKNEYKDEKQISA-----hfmwpgid<br/> -----gkdiqivNVNPSVRArqs tmnatanlsqSVTLACDADCFPEPTMTITKDEPIEQED---NEEKYSFNYdgselIKKVDKSDEAEICIAENKAGEODATHLkvfak-----</p> <p><b>BLAST:</b> aliSize=29 (resi) iden=17.48% (18/103) simi=28.16% (29/103)<br/> vhfaptitflesptsdhwcipftvk-----GNPKPALQWFYNGAILN---ESKYictkihvtnhtEYHGCQLDNPHTMNGDYTLIAKNEYKDEKQI-----sahfmwpgid<br/> -----gkdiqivnvppsvrarqstmnatanlsqsvtlacdadcFPEPTMTITKDEPIEQEDNEEKY-----SFNYDGSelIKKVDKSDEAEICIAENKAGEODATHLkvfak-----</p> <p><b>Proposed:</b> aliSize=90 (resi) RMSD=2.04 (Å)<br/> --V-----HFAPITtFL-ESPTSD---HWCIPFTVKGNPKPALQWFYNGAILN---ESKYICTKIhvtnthtEYHGCQLDNPHTMNGDYTLIAKNEYKDEKQISAHfMGW-pgid<br/> gkDiqivNVNPSV-RARQSTMNAtanlsqSVTLACDADCFPEPTMTITKDEPIEQEDNEEKYSFNY-----DGSELIKKVDKSDEAEICIAENKAGEODATHLK-VFAK----</p>                                                                                   |
| 493 | <p>1wwbX<br/>(103)</p> <p>1kxqE<br/>(120)</p> | N | 9.71  | <p><b>TM-align:</b> aliSize=77 (resi) RMSD=2.40 (Å)<br/> vhfaptitflespts-----DHHWCIPFTVKGNPKPALQWFYNGAILN-----E---SKYICTKIHVtnthtEYHGCQLDNPHTMNGDYTLIAKNEY-----GKDEK-QISAHfMGWpGid<br/> -----qvqlvesgggsvqaggsLSLSCAAsTY--TDTVGRQapgkeregVAaiyrrtgytySadsvKGRFTLSQDNN---KNTVYLQMNLSLKPEDTGIYCATGNS-vrlaswegYFYWGqGTQVT-VS-S---</p> <p><b>SARST:</b> aliSize=81 (resi) RMSD=17.34 (Å)<br/> v--HFAPITtFLESPTSDHWCIPFTVKGNPKPALQWFYNGAILNesKYICTKIHVtnthtEYHGCQLDNPHTMNGDYTLIAKNEY-----neykdekqisahfmwpgid<br/> -qvQLVESGGGSVQAgGSLSLSCAAsTY--TDTVGRQapgkeregVAaiyrrtgytySADSvKGRFTLSQDNNKNTVYLQMNLSLKPEDTGIYCATGNSvrlaswegyfywqgtqvtvss-----</p> <p><b>BLAST:</b> aliSize=8 (resi) iden=6.80% (7/103) simi=7.77% (8/103)<br/> vhfaptitflesptsdhhwc-----PFTVKGNPKPALQWFYNGAILN-----ailneskyictkihvtnhteyhgclqldnphmngdytliakneygkde<br/> -----qvqlvesgggsvqaggsLSLSCAAsTY--TDTVGRQapgkeregVAaiyrrtgytySadsvKGRFTLSQDNNKNTVYLQMNLSLKPEDTGIYCATGNSvrlaswegyfywqgtqvtvss-----</p> <p>kqisahfmwpgid<br/> -----</p> <p><b>Proposed:</b> aliSize=88 (resi) RMSD=2.06 (Å)<br/> vhfaptitflesptsdhhwc-----PFTVKGNPKPALQWFYNGAILN-----E---SKYICTKIHVtnthtEYHGCQLDNPHTMNGDYTLIAKNEY-----eykdekqisahfmwpgid<br/> -qvQLVESGGGSVQAgGSLSLSCAAsTY--TDTVGRQapgkeregVAaiyrrtgytySadsvKGRFTLSQDNNKNTVYLQMNLSLKPEDTGIYCATGNSvrlaswegyfywqgtqvtvss-----</p> |
| 494 | <p>1wwbX<br/>(103)</p> <p>1sq2N<br/>(112)</p> | N | 7.77  | <p><b>TM-align:</b> aliSize=79 (resi) RMSD=2.55 (Å)<br/> vhfaptitflespts-----DHHWCIPFTVKGNPKPALQWFYNGAILNESKYICTKIhvtnthtEYHGCQLDNPHTMNGDYTLIAKNEY-----YKDEK-QISAHfMGWpGid<br/> -----rvdqtpsvtketgesLTINCVLRdAsYALGSTCWRKKSgegneEESISKGGRYVETV--NSG-SKFSLRINDLVEDGTYRCGLGVaggycdyalcssRYAECGdGTAVTVN-----</p> <p><b>SARST:</b> aliSize=84 (resi) RMSD=8.09 (Å)<br/> vhfaptit-----FLESPTSDHWCIPFTVKGNPKPALQWFYNGAILNESKYICTKIhvtnthtEYHGCQLDNPHTMNGDYTLIAKNEY-----EYKDEK-QISAH-fmwpgid<br/> -----rvdqtpsvtketgesLTINCVLRdAsYALGSTCWRKKSgegneEESISKGGRYVETV--NSG-SKFSLRINDLVEDGTYRCGLGVaggycdyalcssRYAECGdGTAVTVN-----</p> <p><b>BLAST:</b> aliSize=2 (resi) iden=1.94% (2/103) simi=1.94% (2/103)<br/> vhfaptitflesptsdhhwcipftvkgnpkpalqwfynghail-----rvdqtpsvtketgesLTINCVLRdAsYALGSTCWRKKSgegneEESISKGGRYVETV--NSG-SKFSLRINDLVEDGTYRCGLGVaggycdyalcssRYAECGdGTAVTVN-----skyictkihvtnhteyhgclqldnphmngdytli<br/> -----akneygkdekqisahfmwpgid</p> <p><b>Proposed:</b> aliSize=87 (resi) RMSD=2.29 (Å)<br/> vhfaptitflesptsdhhwc-----PFTVKGNPKPALQWFYNGAILNESKYICTKIhvtnthtEYHGCQLDNPHTMNGDYTLIAKNEY-----eykdekqisahfmwpgid<br/> -rvdqtpsvtketgesLTINCVLRdAsYALGSTCWRKKSgegneEESISKGGRYVETV--NSG-SKFSLRINDLVEDGTYRCGLGVaggycdyalcssRYAECGdGTAVTVN-----</p>                                                                           |

|     |                                                     |   |       |                                                                                                                                                                                                                                                                                                                                                                                                                                                                                                                                                                                                                                                                                                                                                                                                                                                                                                                                                                                                                                                                                                                                                                                                                                                                                                                                                                                                                                                                                                                                                                                                                                                                                                               |
|-----|-----------------------------------------------------|---|-------|---------------------------------------------------------------------------------------------------------------------------------------------------------------------------------------------------------------------------------------------------------------------------------------------------------------------------------------------------------------------------------------------------------------------------------------------------------------------------------------------------------------------------------------------------------------------------------------------------------------------------------------------------------------------------------------------------------------------------------------------------------------------------------------------------------------------------------------------------------------------------------------------------------------------------------------------------------------------------------------------------------------------------------------------------------------------------------------------------------------------------------------------------------------------------------------------------------------------------------------------------------------------------------------------------------------------------------------------------------------------------------------------------------------------------------------------------------------------------------------------------------------------------------------------------------------------------------------------------------------------------------------------------------------------------------------------------------------|
| 495 | <p>1wwbX<br/>(103)</p> <hr/> <p>2aw2A<br/>(110)</p> | N | 13.59 | <p><b>TM-align:</b> aliSize=84 (resi) RMSD=2.54 (Å)<br/> vhfaptitflespts-----DHHWCIPFTVKG-NPKPALQWFY---GAILNESkyICTKIHVtNHtEYHGCLDNPthmngdyTLIAKNEYGKDEK-QISAHfMGW-PGId---<br/> -----cdvqlyikrqsehsilaGDPFELECPVYcANRPHVTWCKLNgTTCVKLED-R-QISWKEEKN-ISFFILHFEVPLPNDNGSRCSANFQSNLIESHSTTLyVTDVkhHH-hhh</p> <p><b>SARST:</b> aliSize=90 (resi) RMSD=12.71 (Å)<br/> vhf-----APTITFLESPTSDDHWCIPFTVKG-NPKPALQWFY---GAILNESkyICTKIHVtNHtEYHGCLDNPthmngdyTLIAKNEYGKDEKQISA-----hfmwpgid<br/> ---cdvqlyiKROSEHSILAGDPFELECPVYcANRPHVTWCKLNgTTCVKLEDROT-SW-KEEKNISSFFILHFEVPLPNDNGSRCSANFQSNLIESHSTTLyvtDvkhhhhhh-----</p> <p><b>BLAST:</b> aliSize=15 (resi) iden=7.77% (8/103) simi=14.56% (15/103)<br/> vhfaptitflesptsdhhwcipftvkgnpkpalqwfynGAILNESKYICTKIHVtNHtEYHGCLDNPthmngdyTLIAKNEYGKDEKQISA-----hfmwpgid<br/> -----cdvqlyikrqsehsilaGDPFELECPVYcANRPHVTWCKLNgTTCVKLEDROT-SW-KEEKNISSFFILHFEVPLPNDNGSRCSANFQSNLIESHSTTLyvtDvkhhhhhh-----</p> <p><b>Proposed:</b> aliSize=97 (resi) RMSD=2.25 (Å)<br/> VHFAPTIT--FLESPTSDDHWCIPFTVKG-NPKPALQWFY---GAILNESkyICTKIHVtNHtEYHGCLDNPthmngdyTLIAKNEYGKDEK-QISAHfMGW--PG----id<br/> CDVQLYIKRqSEHSILAGDPFELECPVYcANRPHVTWCKLNgTTCVKLED-R-QISWKEEKN-ISFFILHFEVPLPNDNGSRCSANFQSNLIESHSTTLy-VTDVkhHHhhhh--</p>                                                                                                                                                                                                                                                                                                                                                                                                                                                         |
| 496 | <p>1wwbX<br/>(103)</p> <hr/> <p>2aw2X<br/>(107)</p> | N | 13.59 | <p><b>TM-align:</b> aliSize=81 (resi) RMSD=2.27 (Å)<br/> vhfaptitflespts-----DHHWCIPFTVKG-NPKPALQWFY---GAILNESkyICTKIHVtNHtEYHGCLDNPthmngdyTLIAKNEYGKDEK-QISAHfMGWPgid----<br/> -----cdvqlyikrqsehsilaGDPFELECPVYcANRPHVTWCKLNgTTCVKLED--RQISWKEEKN-ISFFILHFEVPLPNDNGSRCSANFQSNLIESHSTTLyVTDV---khh</p> <p><b>SARST:</b> aliSize=64 (resi) RMSD=9.47 (Å)<br/> vhfaptitflesptsdhhwcip-FVKG-NPKPALQWFYNGAILNESKYICTKIHVtNHtEYHGCLDNPthmngdyTLIAKNEYGKDEKQISA-----hfmwpgid<br/> -----cdVQLYIKROSEHSILAGDPFELECPVYcANRPHVTWCKLNgTTCVKLEDROT-SW-KEEKNISSFFILHFEVPLPNDNGSRCSANFQSNLIESHSTTLyvtDvkhhhh-----</p> <p><b>BLAST:</b> aliSize=15 (resi) iden=7.77% (8/103) simi=14.56% (15/103)<br/> vhfaptitflesptsdhhwcipftvkgnpkpalqwfynGAILNESKYICTKIHVtNHtEYHGCLDNPthmngdyTLIAKNEYGKDEKQISA-----hfmwpgid<br/> -----cdvqlyikrqsehsilaGDPFELECPVYcANRPHVTWCKLNgTTCVKLEDROT-SW-KEEKNISSFFILHFEVPLPNDNGSRCSANFQSNLIESHSTTLyvtDvkhhhh-----</p> <p><b>Proposed:</b> aliSize=95 (resi) RMSD=2.14 (Å)<br/> VHFAPTIT--FLESPTSDDHWCIPFTVKG-NPKPALQWFY---GAILNESkyICTKIHVtNHtEYHGCLDNPthmngdyTLIAKNEYGKDEK-QISAHfMGWP----gid<br/> CDVQLYIKRqSEHSILAGDPFELECPVYcANRPHVTWCKLNgTTCVKLED--RQISWKEEKN-ISFFILHFEVPLPNDNGSRCSANFQSNLIESHSTTLy-VTDVkhHHhh--</p>                                                                                                                                                                                                                                                                                                                                                                                                                                                                         |
| 497 | <p>1wwbX<br/>(103)</p> <hr/> <p>2cdeA<br/>(192)</p> | N | 6.80  | <p><b>TM-align:</b> aliSize=84 (resi) RMSD=2.49 (Å)<br/> vhfaptitflespts-----DHHWCIPFTVKG-NPKPALQWFY---GAILNESkyICTKIHVtNHtEYHGCLDNPthmngdyTLIAKNEYGKDEK-QISAHfMGW-PGId---P<br/> -----nqveqspqslillegkncTLQcnytvspfnlRyKQdgrGVPVSLTImtfsentksNGRYTATL-DAD-TKOSSLHTASQLSDSASYICVVSdrgstlGRlyfgrgtqlTWVWPDlQkdpavyqlrdskssdksvclftdfdsqtnvsqskdsdvyitdktvldmrsmdfk<br/> GID-----<br/> SNsawasnksdfacanafnn</p> <p><b>SARST:</b> aliSize=85 (resi) RMSD=12.79 (Å)<br/> vhfaptitflesptsd-HHWWCIPFTVKG-NPKPALQWFY---GAILNESkyICTKIHVtNHtEYHGCLDNPthmngdyTLIAKNEYGKDEKQISA-----hfmwpgid<br/> -----nQVEQSPQSLIILEGKNC TLQcnytvspfnlRyKQdgrGVPVSLTImtfsentksNGRYTATL-DAD-TKOSSLHTASQLSDSASYICVVSdrgstlGRlyfgrgtqlTWVWPDlQkdpavyqlrdskssdksvclftdfdsqtnvsqskdsdvyitdktvldmrsmdfksns</p> <p>-----id<br/> avawsnksdfacanafnn--</p> <p><b>BLAST:</b> aliSize=17 (resi) iden=11.65% (12/103) simi=16.50% (17/103)<br/> vhfaptitflesptsd-HHWWCIPFTVKG-NPKPALQWFY---GAILNESkyICTKIHVtNHtEYHGCLDNPthmngdyTLIAKNEYGKDEKQISA-----hfmwpgid<br/> -----nqveqspqslillegkncTLQcnytvspfnlRyKQdgrGVPVSLTImtfsentksNGRYTATL-DAD-TKOSSLHTASQLSDSASYICVVSdrgstlGRlyfgrgtqlTWVWPDlQkdpavyqlrdskssdksvclftdfdsqtnvsqskdsdvyitdktvldmrsmdfksnsavaw</p> <p>-----gclqldnpthmngdyTLIAKNEYGKDEKQISA-----hfmwpgid<br/> snksdfacanafnn-----</p> <p><b>Proposed:</b> aliSize=97 (resi) RMSD=2.42 (Å)<br/> VHFAPTITFLESPTSd-HHWWCIPFTVKG-NPKPALQWFY---GAILNESkyICTKIHVtNHtEYHGCLDNPthmngdyTLIAKNEYGKDEKQISA-----hfmwpgid<br/> -NQVEQSPQSLIILEGKNC TLQcnytvspfnlRyKQdgrGVPVSLTImtfsentksNGRYTATL-DAD-TKOSSLHTASQLSDSASYICVVSdrgstlGRlyfgrgtqlTWVWPDlQkdpavyqlrdskssdksvclftdfdsqtnvsqskdsdvyitdktvldmrsmdfksnsavawsnksdf<br/> -----<br/> acanafnn</p> |

|     |             |   |       |                                                                                                                                                                                                                                                                                                                                                                                                                                                                                                                                                                                                                                                                                                                                                                                                                                                                                                                                                                                                                                                                                                                                                                                                                                                                                                                                                                                                                           |
|-----|-------------|---|-------|---------------------------------------------------------------------------------------------------------------------------------------------------------------------------------------------------------------------------------------------------------------------------------------------------------------------------------------------------------------------------------------------------------------------------------------------------------------------------------------------------------------------------------------------------------------------------------------------------------------------------------------------------------------------------------------------------------------------------------------------------------------------------------------------------------------------------------------------------------------------------------------------------------------------------------------------------------------------------------------------------------------------------------------------------------------------------------------------------------------------------------------------------------------------------------------------------------------------------------------------------------------------------------------------------------------------------------------------------------------------------------------------------------------------------|
| 498 | 1wwbX (103) | N | 6.80  | <p><b>TM-align:</b> aliSize=83 (resi) RMSD=2.56 (Å)<br/> vhfaptitflespts-----DHHWCIPFTV--KGNPKPALOWFYN-----GAILNESKYICTKihVTNhtEYHGCQLDNPThMNNCDYTLIAKNE-----YG--K-DEKQISAHFMGwPGId<br/> -----rvdqtpqitike<b>tGESL</b>TINCVLrdSNCALSSTYRKRksgstnEESI<b>SKGGRYVETV</b>-NS-G-SKSFSLRINDLIVEDSSTIRCKPESRygsydaeCAalNdQYGGGTVVTVN-AAA-</p> <p><b>SARST:</b> aliSize=75 (resi) RMSD=16.28 (Å)<br/> v---HFAPITITFLESPTS<b>DHHWCIP</b>-----FTVKGKPKPALOWFYngaILNESKYICTKihVTNhtEYHGCQLDNPThMNNCDYTLIAKNE-----eygkdekqisahfmwpgid<br/> -rvdQTPQITITKET<b>GESL</b>TINCVLRdsncalssTYWRKKS<b>SGSTNEE</b>---SISKGGRYVETV--<b>VNSGS</b>-KSFSLRINDLIVEDSSTIRCKPESRygsydaeCaalndqygggtvvtvnaa-----</p> <p><b>BLAST:</b> aliSize=24 (resi) iden=10.68% (11/103) simi=23.30% (24/103)<br/> vhfaptitflespts<b>dhhw</b>cipftvkgnpkpalq-----FYNGAILNESKYI--CTKIHVTNHTEYHGCQLDNPThMNNCDYTLIAKNE<b>YKDEKQISA</b>-----hfmwpgid<br/> -----rvdqtpqitike<b>tgesl</b>tincvlrdsncalssTYWRKKS<b>SGSTNEE</b>SISKGGRYVETV<b>SGSKSFS</b>LRINDLIVEDSSTIRCKPESR<b>YGSYDAECA</b>alndqygggtvvtvnaa-----</p> <p><b>Proposed:</b> aliSize=93 (resi) RMSD=2.21 (Å)<br/> vhfAPITITFLESPTS<b>dh-hwCIPFTV</b>--KGNPKPALOWFYN-----GAILNESKYICTKihVTNhtEYHGCQLDNPThMNNCDYTLIAKNE-----YG--K-DEKQISAHFMGwPG-id<br/> ---RVDQTPQITITKET<b>GESL</b>TINCVLRdsncalssTYWRKKS<b>SGSTNEE</b>SISKGGRYVETV<b>NSGS</b>-KSFSLRINDLIVEDSSTIRCKPESRygsydaeCAalNdQYGGGTVVTVN-AAA--</p> |
| 499 | 1wwbX (103) | N | 10.68 | <p><b>TM-align:</b> aliSize=81 (resi) RMSD=2.44 (Å)<br/> vhfaptitflespts-----DHHWCIPFTV--KGNPKPALOWFYN-----GAILNESKYICTKihVTNhtEYHGCQLDNPThMNNCDYTLIAKNE--YKDEK-QISAHFMGwPGId<br/> -----esvltpqpsas<b>gtpGORVT</b>SCIGSaTDiGSNSVIVYQQVpgkaPKLIyyndlLpsgvDRFSASKS-G---TSASLAISGLESEDEADYCAW<b>W</b>NDsIDEPGFggGTLT-VLGQPK-</p> <p><b>SARST:</b> aliSize=89 (resi) RMSD=15.69 (Å)<br/> v---HFAPITITFLESPTS<b>DHHWCIP</b>FTV--KGNPKPALOWFYNG--AILNESKYICTKihVTNhtEYHGCQLDNPThMNNCDYTLIAKNE--YKDE--KQISAH-----fmwpgid<br/> -esvlTQP<b>SASGTPGORVT</b>SCIGSaTDiGSNSVIVYQQVpgkaPKLIyyndlLpsgvDRFSASKS--KSGT---SASLAISGLESEDEADYCAW<b>W</b>NDsIDEPGFggGTLT<b>V</b>lgqpk-----</p> <p><b>BLAST:</b> aliSize=5 (resi) iden=4.85% (5/103) simi=4.85% (5/103)<br/> vhfaptitflespts<b>dhhw</b>cipftvkgnpkpalq-----FYNGAILNESKYI--CTKIHVTNHTEYHGCQLDNPThMNNCDYTLIAKNE<b>YKDEKQISA</b>-----hfmwpgid<br/> -----esvltpqpsas<b>gtpGORVT</b>SCIGSaTDiGSNSVIVYQQVpgkaPKLIyyndlLpsgvDRFSASKS-G---TSASLAISGLESEDEADYCAW<b>W</b>NDsIDEPGFggGTLT<b>V</b>lgqpk-----</p> <p>eygkdekqisahfmwpgid<br/> -----</p> <p><b>Proposed:</b> aliSize=91 (resi) RMSD=2.24 (Å)<br/> vh--FAPITITFLESPTS<b>dh-hwCIPFTV</b>--KGNPKPALOWFYNG--AILNESKYICTKihVTNhtEYHGCQLDNPThMNNCDYTLIAKNE--YKDEK-QISAHFMGwPGid<br/> --esVLTQP<b>SASGTPGORVT</b>SCIGSaTDiGSNSVIVYQQVpgkaPKLIyyndlLpsgvDRFSASKS-G---TSASLAISGLESEDEADYCAW<b>W</b>NDsIDEPGFggGTLT<b>V</b>lgqpk--</p>  |
| 500 | 1wwbX (103) | N | 8.74  | <p><b>TM-align:</b> aliSize=79 (resi) RMSD=2.14 (Å)<br/> vhfaptitflespts-----DHHWCIPFTV--KGNPKPALOWFYN-----GAILNESKYICTKihVTNhtEYHGCQLDNPThMNNCDYTLIAKNE--YKDEK-QISAHFMGwPGid<br/> -----awwdqprtiti<b>ketGESL</b>TINCVLrdHsCGLSSTTWYRTqlgsInEKTISIGGRYDETVDKG--SKSFSLRISDLRVEDSSTIRCKQADYSPscysyspsleSAVEGaGTVLT-VK----</p> <p><b>SARST:</b> aliSize=77 (resi) RMSD=13.18 (Å)<br/> v---HFAPITITFLESPTS<b>dh-hwCIPFTV</b>--KGNPKPALOWFYNG--AILNESKYICTKihVTNhtEYHGCQLDNPThMNNCDYTLIAKNE--YKDEK-QISAHFMGwPGid<br/> -awwdQTPR<b>ITKETGESL</b>TINCVLrdHsCGLSSTTWYRTqlgsInEKTISIGGRYDETVDKGSKS--FSLRISDLRVEDSSTIRCKQADYSPscysyspslesavegagtvltvk-----</p> <p><b>BLAST:</b> aliSize=8 (resi) iden=4.85% (5/103) simi=7.77% (8/103)<br/> vhfaptitflespts<b>dhhw</b>cipftvkgnpkpalqfyngaILNESKYICTKihVTNhtEYHGCQLDNPThMNNCDYTLIAKNE<b>YKDEKQISA</b>-----hfmwpgid<br/> -----awwdqprtiti<b>ketgesl</b>tincvlrdhscglsssttwy<b>RTQLGS</b>tNEK<b>TS</b>IGGRYDETVDKGSK<b>S</b>FLRISDLRVEDSSTIRCKQADYSPscysyspslesavegagtvltvk-----</p> <p>--ahfmwpgid<br/> vk-----</p> <p><b>Proposed:</b> aliSize=90 (resi) RMSD=2.15 (Å)<br/> vhFAPITITFLESPTS<b>dh-hwCIPFTV</b>--KGNPKPALOWFYNG--GAILNESKYICTKihVTNhtEYHGCQLDNPThMNNCDYTLIAKNE--YKDEK-QISAHFMGwPGid<br/> -AWVDQTPR<b>ITKETGESL</b>TINCVLrdHsCGLSSTTWYRTqlgsInEKTISIGGRYDETVDKG--SKSFSLRISDLRVEDSSTIRCKQADYSPscysyspsleSAVEGaGTVLT-VK-----</p>                                        |

|     |                                                     |   |       |                                                                                                                                                                                                                                                                                                                                                                                                                                                                                                                                                                                                                                                                                                                                                                                                                                                                                                                                                                                                                                                                                                                                                                                                                                                                                                                                                                                                                                                                                                                                                                                                                                                                                                                                                                                                                                                                                                                                     |
|-----|-----------------------------------------------------|---|-------|-------------------------------------------------------------------------------------------------------------------------------------------------------------------------------------------------------------------------------------------------------------------------------------------------------------------------------------------------------------------------------------------------------------------------------------------------------------------------------------------------------------------------------------------------------------------------------------------------------------------------------------------------------------------------------------------------------------------------------------------------------------------------------------------------------------------------------------------------------------------------------------------------------------------------------------------------------------------------------------------------------------------------------------------------------------------------------------------------------------------------------------------------------------------------------------------------------------------------------------------------------------------------------------------------------------------------------------------------------------------------------------------------------------------------------------------------------------------------------------------------------------------------------------------------------------------------------------------------------------------------------------------------------------------------------------------------------------------------------------------------------------------------------------------------------------------------------------------------------------------------------------------------------------------------------------|
| 501 | <p>1wwbX<br/>(103)</p> <hr/> <p>3darA<br/>(99)</p>  | N | 16.16 | <p><b>TM-align:</b> aliSize=75 (resi) RMSD=2.08 (Å)<br/> vhfaptitflespts-----DHFWCIPFTVKGNPKALQWFYNGAILNES---KYICTKIHVtnhteyGCLQDNPTHMNGDYTLIAKNEYGKDEKQISAHfMGwpgid<br/> -----krapywntekmekrlhavpaANTVKFRCPAGGNPMTMRWLKNGKEFKQEHRIIGGYKVRNQ-----HWSIMESVVPSDKNYTCVVENEYGSINHXYHLD-VV-----</p> <p><b>SARST:</b> aliSize=87 (resi) RMSD=15.88 (Å)<br/> vh-FAPTITIF-----LESPTSDFHWCIPTVKGNPKALQWFYNGAILN--ESKYICTKIHVtNtEyhGCLQDNPTHMNGDYTLIAKNEYGKDEKQISAH--fmgwpgid<br/> --kRAPHYWNtekmekrLHAVPAANTVKFRCPAGGNPMTMRWLKNGKEFKQEHRIIGGYKVRN--QHW---SIIIMESVVPSDKNYTCVVENEYGSINHXYHLDVv-----</p> <p><b>BLAST:</b> aliSize=29 (resi) iden=19.19% (19/99) simi=29.29% (29/99)<br/> vhfaptitflesptsDHFwcipftvk-----GNPKALQWFYNGAILNESKYICTKIHVtNhteyGCLQDNPTHMNGDYTLIAKNEYG-----kdekqisahfmgwpgid<br/> -----krapywntekmekrlhavpaantvkfrcpagGNPMTMRWLKNGKEFKQEHRI--GGYKVRNQ-----HWSIMESVVPSDKNYTCVVENEYGSinhxyhldv-----</p> <p><b>Proposed:</b> aliSize=88 (resi) RMSD=2.00 (Å)<br/> v-HFAPT--IT-FLE-SPTSDF--HWCIPTVKGNPKALQWFYNGAILNES---KYICTKIHVtnhteyGCLQDNPTHMNGDYTLIAKNEYGKDEKQISAHfMGwpgid<br/> -kRAPHYWNtekmekrLHAVPAANTVKFRCPAGGNPMTMRWLKNGKEFK--QehriGGYKVRNQ-----HWSIMESVVPSDKNYTCVVENEYGSINHXYHLD-VV-----</p>                                                                                                                                                                                                                                                                                                                                                                                                                                                                                                                                                                                                                                                                                                                   |
| 502 | <p>1wwcA<br/>(105)</p> <hr/> <p>1a6wL<br/>(109)</p> | N | 5.71  | <p><b>TM-align:</b> aliSize=76 (resi) RMSD=2.50 (Å)<br/> tvyypprvvsllepelr-----LEHCFEFVVR--GNPPPTLHNLHN-----GOP-----RESKI IHVEYYQegeiSEGCLFNKPTHYNNGN TLI AKNPLGT ANO-TINGHFLKefpvd<br/> -----avvtqesal t t spg ET VTL TCRSS Tgav TTSNYANWVQEKpdhIFTG i ggt n n r a p g V P A - R F S G S L I G --- N K A A I T I T G A Q T E D E A I F C A L W Y S N H W F G g G T K L T V L E -----</p> <p><b>SARST:</b> aliSize=82 (resi) RMSD=12.06 (Å)<br/> tvyypprvv-----SLLEPELRLEHCFEFVVRG--NPPTLHNLHN-----EFVVRG--NPPTLHNLHN-----GOP-----RESKI IHVEYYQegeiSEGCLFNKPTHYNNGN TLI AKNPLGT ANO---TINGHFLKefpvd<br/> -----avvtqesal t t spg ET VTL TCRSS Tgav t t s n y A N W V Q E K D H L F T G I G G T N N R A P G V P A R F S G S L I G --- I G N --- K A A I T I T G A Q T E D E A I F C A L W Y S N H W F G g g t K L T V L e -----</p> <p><b>BLAST:</b> aliSize=2 (resi) iden=1.90% (2/105) simi=1.90% (2/105)<br/> tvyypprvvsllepelrlehciefvvrngppptlhwlhngqplreski ihveyyqegeisegclfnkpthynnngntliaknplgtanqtinghflkefpv-----avvtqesal t t spg e t v t l t c r s s t g a v t t s n y a n w v q e k p d h l f t g i g g t n n r a p g v p a r f s g s l i g n k a a l t i t g a q t e d e a i y<br/> -----<br/> fcalwysnhwvfgggtklvle</p> <p><b>Proposed:</b> aliSize=89 (resi) RMSD=2.31 (Å)<br/> tvYYPPRVVSLLEPELRLEHCFEFVVRG-----npPPTLHNLHN-----GOP-----R--ESKI IHVEYYQegeiSEGCLFNKPTHYNNGN TLI AKNPLGT ANO-TINGHFLKefpvd<br/> --AVVTQESAL t t spg ET VTL TCRSS Tgav t t - S N Y A N W V Q E K P D H I F T G I G G T N N R A P G V P A R F S G S L I G --- N K A A I T I T G A Q T E D E A I F C A L W Y S N H W F G g G T K L T V L E -----</p>                                                                                                                                                                                                                                                                                    |
| 503 | <p>1wwcA<br/>(105)</p> <hr/> <p>lhxmA<br/>(206)</p> | N | 4.76  | <p><b>TM-align:</b> aliSize=62 (resi) RMSD=3.39 (Å)<br/> tvyypprvvsllepelr-----LHCFEFVVRGnpPTLHNLHNgqpl--RESKI IH-V<br/> -----aieivpehqtvpsvsgvatlrscmkgeaignyinywrktqntmtfiyrekdigyggfkdnfqgdidiaknlavlkilapserdegssycacdtlmgggytdkligkgrvtveprsqhtkpsvfmkngtnvacLVKEFY--KDIRINIVS-----skk--ITEFDp</p> <p>EYYQEG--EISEGCLFNKPTHYNNGN TLI AKNPLGT ANO-TINGHFLKefpvd---<br/> AIVIS-psGKYNAVKLG--YEDS SVTCSVOHD---NKTVHST-----dfe</p> <p><b>SARST:</b> aliSize=91 (resi) RMSD=14.68 (Å)<br/> -aieivpehqtvpsvsgvatlrscmkgeaignyinywrktqntmtfiyrekdigyggfkdnfqgdidiaknlavlkilapserdegssycacdtlmgggytdkligkgrvtveprsqhtkpsvfmkngtnvacLVKEFY--KDIRINIVS-----skk--ITEFDp<br/> -----VYPPR-----VVSLEPELRLEHCFEFVVRG--NPPTLHNLHNGO---PLRESKI IHVEYYQEGEIS-EGCLFNKPTHYNNGN TLI AKN---PLG<br/> TANOTIN-----ghflkefpvd<br/> VTCSVOHdnktvhs t d f e -----</p> <p><b>BLAST:</b> aliSize=25 (resi) iden=12.38% (13/105) simi=23.81% (25/105)<br/> tvyypprvvsllepelrlehciefvvrngppptlhwlhngqplreski ihveyyqegeisegclfnkpthynnngntliaknplgtanqtinghflkefpv-----avvtqesal t t spg e t v t l t c r s s t g a v t t s n y a n w v q e k p d h l f t g i g g t n n r a p g v p a r f s g s l i g n k a a l t i t g a q t e d e a i y<br/> -----aieivpehqtvpsvsgvatlrscmkgeaignyinywrktqntmtfiyrekdigyggfkdnfqgdidiaknlavlkilapserdegssycacdtlmgggytdkligkgrvtveprsqhtkpsvfmkngtnvacLVKEFY--KDIRINIVS-----skk--ITEFDp<br/> -----nytliaknplgtanqtinghflkefpvd<br/> gkynavklgkyedsnsvtcsvqhdnktvhs t d f e -----</p> <p><b>Proposed:</b> aliSize=96 (resi) RMSD=2.45 (Å)<br/> tvYYPPRVVSLLEPELRLEHCFEFVVRG--NPPTLHNLHN-----GOP-----R--ESKI IHVEYYQegeiSEGCLFNKPTHYNNGN TLI AKN-----PL-GTANO-TINGHFLK-----EP-----FP-----<br/> --AIEIVPEHQTVPSVSGVATLRCSMKGEAIG--NYINWYRKtqntMTFIyrekdigyggfkdnfqgdidiaknlavlkilapserdegssycacdtlmgggytdkligkgrvtveprsqhtkpsvfmkngtnvacLVKEFY--KDIRINIVS-----skk--ITEFDp<br/> -----vde<br/> dsvtcsvqhdnktvhs t d f e -----</p> |



|     |                                             |   |       |                                                                                                                                                                                                                                                                                                                                                                                                                                                                                                                                                                                                                                                                                                                                                                                                                                                                                                                                                                                                                                                                                                                                                                                                                                                                                                                                                                                                                                 |
|-----|---------------------------------------------|---|-------|---------------------------------------------------------------------------------------------------------------------------------------------------------------------------------------------------------------------------------------------------------------------------------------------------------------------------------------------------------------------------------------------------------------------------------------------------------------------------------------------------------------------------------------------------------------------------------------------------------------------------------------------------------------------------------------------------------------------------------------------------------------------------------------------------------------------------------------------------------------------------------------------------------------------------------------------------------------------------------------------------------------------------------------------------------------------------------------------------------------------------------------------------------------------------------------------------------------------------------------------------------------------------------------------------------------------------------------------------------------------------------------------------------------------------------|
| 504 | <p>1wwcA (105)</p> <hr/> <p>1sq2N (112)</p> | N | 10.48 | <p><b>TM-align:</b> aliSize=78 (resi) RMSD=2.45 (Å)<br/> tvyypprvvs leepelr-----LEHCIEFVVRG-NPPPTLHHLHN-----GOPLRESKIIHVEYYOEGEISEGCLFNKPTHYNNNGNYTLIAKNP-----LGTANQ-TINGHfLkEpfpvde<br/> -----rvdqtprrsvtketESLTLNCLRdAsYALGSTCWRKKSgegnEESI SKGGRYVETV-NSG-SKSFSLRI NDLI VEDGGTYRCGLGVAggycdyalcssRYAECGdGTAVT-VN-----</p> <p><b>SARST:</b> aliSize=84 (resi) RMSD=8.30 (Å)<br/> tvyypprvv-----SLEEP-ELRLEHCIEFVVRG-NPPPTLHHLHN-----OPLRESKIIHVEYYOEGEISEGCLFNKPTHYNNNGNYTLIAKN-----PLGTAN-QINGH-fLkEpfpvde<br/> -----rvdqtprrsvtketESLTLNCLRdAsYALGSTCWRKKSgegnEESI SKGGRYVETV-NSGSKSFSRLRI NDLI VEDGGTYRCGLGVAggycdyalcssRYAECGdGTAVTn-----</p> <p><b>BLAST:</b> aliSize=9 (resi) iden=5.71% (6/105) simi=8.57% (9/105)<br/> tvyypprvvs leepelr-----LEHCIEFVVRG-NPPPTLHHLHN-----GOPLRESKIIHVEYYOEGEISEGCLFNKPTHYNNNGNYTLIAKNP-----LGTANQ-TINGHfLkEpfpvde<br/> -----rvdqtprrsvtketESLTLNCLRdAsYALGSTCWRKKSgegnEESI SKGGRYVETV-NSGSKSFSRLRI NDLI VEDGGTYRCGLGVAggycdyalcssRYAECGdGTAVTn-----efvvrngnpptlhwhlhnqplreskiihveyyqgeisegclfnkpthynngnytliaknplgtanqtingh<br/> fLkEpfpvde<br/> -----</p> <p><b>Proposed:</b> aliSize=89 (resi) RMSD=2.11 (Å)<br/> tvyypprvvs leepelr-----LEHCIEFVVRG-NPPPTLHHLHN-----GOPLRESKIIHVEYYOEGEISEGCLFNKPTHYNNNGNYTLIAKN-----pLGTANQTINGHFLK Epfpvde<br/> -----RVDQTPrrsvtketESLTLNCLRdAsYALGSTCWRKKSgegnEESI SKGGRYVETV-NSG-SKSFSLRI NDLI VEDGGTYRCGLGVAggycdyalcssRYAECGdGTAVTn-----</p> |
| 505 | <p>1wwcA (105)</p> <hr/> <p>2aw2A (110)</p> | N | 13.33 | <p><b>TM-align:</b> aliSize=78 (resi) RMSD=2.48 (Å)<br/> tvyypprvvs leepelr-----LEHCIEFVVRG-NPPPTLHHLHN-----GOPLRESKIIHVEYYOEGEISEGCLFNKPTHYNNNGNYTLIAKNPLGTANQ-TINGHFLK E--Pfpvde-----<br/> -----cdvqliykrqsehsilagDPFELECPVKYcANRHVTWCKLngt tCVKLEDR---QTSWKEE-kNLSFFIHFEPVLPNDNGSIRCSANFQSNLIESHSTTLVTD-vkH-----hHHHH</p> <p><b>SARST:</b> aliSize=90 (resi) RMSD=7.64 (Å)<br/> tvyypprvv-----SLEPELRL EHCIEFVVRG-NPPPTLHHLHN-----QPLRESKIIHVEYYOEGEISEGCLFNKPTHYNNNGNYTLIAKNPLGTANQTINGHFLKE-----pfpvde<br/> -----cdvqliykrqsehsilagDPFELECPVKYcANRHVTWCKLNGTTCVKLEDRQTSWKEEKNLSFFIHFEPVLPNDNGSIRCSANFQSNLIESHSTTLVTDvkhhhhhh-----</p> <p><b>BLAST:</b> aliSize=19 (resi) iden=11.43% (12/105) simi=18.10% (19/105)<br/> tvyypprvvs leepelr-----LEHCIEFVVRG-NPPPTLHHLHN-----GOPLRESKIIHVEYYOEGEISEGCLFNKPTHYNNNGNYTLIAKNPLGTANQ-TINGHFLK E--Pfpvde-----<br/> -----cdvqliykrqsehsilagDPFELECPVKYcANRHVTWCKLNGTTCVKLEDRQTSWKEEKNLSFFIHFEPVLPNDNGSIRCSANFQSNLIESHSTTLVTDvkhhhhhh-----tliaknplgtanqtinghflkepfpvde</p> <p><b>Proposed:</b> aliSize=91 (resi) RMSD=2.18 (Å)<br/> TVYYpPRVVS-SLEPELRL EHCIEFVVRG-NPPPTLHHLHN-----GOPLRESKIIHVEYYOEGEISEGCLFNKPTHYNNNGNYTLIAKNPLGTANQ-TINGHFLK E-----epfpvde<br/> CDVQ-LYIKrgSEHSILAGDPFELECPVKYcANRHVTWCKLngt tCVKLEDR---QTSWKEEkn---LSFFIHFEPVLPNDNGSIRCSANFQSNLIESHSTTLVTDvkhhhhhh-----</p>                                                                                     |
| 506 | <p>1wwcA (105)</p> <hr/> <p>2dkuA (103)</p> | N | 9.71  | <p><b>TM-align:</b> aliSize=71 (resi) RMSD=1.90 (Å)<br/> tvyypprvvs leepelr-----LEHCIEFVVRG-NPPPTLHHLHN-----GOPLRESKIIHVEYYOEGEISEGCLFNKPTHYNNNGNYTLIAKNplgtANQTINGHFLK Epfpvde-----<br/> -----gssgsgancf teel tnlqveekGTAVFTCKTEH---AAAVTVRKGLLELRASGKHQPSQ-EG--L-TLRITISALEKADSDTYTCDIG---QAQSRQQLLVQG-----rrsgpssg</p> <p><b>SARST:</b> aliSize=80 (resi) RMSD=11.84 (Å)<br/> tvyypprvvs leepelr-----LEHCIEFVVRG-NPPPTLHHLHN-----GOPLRESKIIHVEYYOEGEISEGCLFNKPTHYNNNGNYTLIAKNPLGTANQTINGH-----fLkEpfpvde<br/> -----gssgsgancf teel tnlqveekGTAVFTCKTEH---AAAVTVRKGLLELRASGKHQPSQ-EG--L-TLRITISALEKADSDTYTCDIG---QAQSRQQLLVQgrrsgpssg-----</p> <p><b>BLAST:</b> aliSize=4 (resi) iden=2.91% (3/103) simi=3.88% (4/103)<br/> tvyypprvvs leepelr-----LEHCIEFVVRG-NPPPTLHHLHN-----GOPLRESKIIHVEYYOEGEISEGCLFNKPTHYNNNGNYTLIAKNplgtANQTINGHFLK Epfpvde-----<br/> -----gssgsgancf teel tnlqveekGTAVFTCKTEH---AAAVTVRKGLLELRASGKHQPSQ-EG--L-TLRITISALEKADSDTYTCDIG---QAQSRQQLLVQgrrsgpssg-----skiihveyyqgeisegclfnkpthynngnytliaknplgtanqti<br/> nghflkepfpvde<br/> -----</p> <p><b>Proposed:</b> aliSize=88 (resi) RMSD=1.98 (Å)<br/> TVYYpPRVVS-SLEPELRL EHCIEFVVRG-NPPPTLHHLHN-----GOPLRESKIIHVEYYOEGEISEGCLFNKPTHYNNNGNYTLIAKNplgtANQTINGHFLK E-----epfpvde<br/> gssGSSGANCFT EELTNLQveekGTAVFTCKTEH---AAAVTVRKGLLELRASGKHQPSQ-EG--L-TLRITISALEKADSDTYTCDIG---QAQSRQQLLVQgrrsgpssg-----</p>                                     |

|     |                                             |   |       |                                                                                                                                                                                                                                                                                                                                                                                                                                                                                                                                                                                                                                                                                                                                                                                                                                                                                                                                                                                                                                                                                                                                                                                                                                                                        |
|-----|---------------------------------------------|---|-------|------------------------------------------------------------------------------------------------------------------------------------------------------------------------------------------------------------------------------------------------------------------------------------------------------------------------------------------------------------------------------------------------------------------------------------------------------------------------------------------------------------------------------------------------------------------------------------------------------------------------------------------------------------------------------------------------------------------------------------------------------------------------------------------------------------------------------------------------------------------------------------------------------------------------------------------------------------------------------------------------------------------------------------------------------------------------------------------------------------------------------------------------------------------------------------------------------------------------------------------------------------------------|
| 507 | <p>1wwcA (105)</p> <hr/> <p>2rheA (114)</p> | N | 10.48 | <p><b>TM-align:</b> aliSize=81 (resi) RMSD=2.62 (Å)<br/> tvyypprvvs leepelr-----LHCIEFVVRGNP--PPTLHLHNGOPLRESKI IHVEYyQEGEISEGCLFNKPTHYNNNGNYTLIAKNP--LGTANQ-TINGHFLKEFPVDE<br/> -----esvltqppsasgtpgqrvtsictgsatdigsnsviwyqqvpgkapklliyndllpsgvsdrfsasksgt--T-SASLAISGLESEDEADYCAWVNDsIDEPGFgGtKLTvLGqpk-----</p> <p><b>SARST:</b> aliSize=76 (resi) RMSD=15.97 (Å)<br/> tv--YPPRVVSLLEELRLHCIEFVVRGNP--PPTLHLHNGOPLRESKI IHVEYyQEGEISEGCLFNKPTHYNNNGNYTLIAknplgtanqtinghflke-----pfpvde<br/> --esvltqppSASGTPGQRV1-1SCTIGSaTdigsnsviwyqqvpgkapklliyndllpsgvsdrfsasksgt--T-SASLAISGLESEDEADYCAWVNDsIDEPGFgGtKLTvLGqpk-----</p> <p><b>BLAST:</b> aliSize=5 (resi) iden=3.81% (4/105) simi=4.76% (5/105)<br/> tvyypprvv-----esvltqppsasgtpgqrvtsictgsatdigsnsviwyqqvpgkapklliyndllpsgvsdrfsasksgt--T-SASLAISGLESEDEADYCAWVNDsIDEPGFgGtKLTvLGqpk-----eirlchciefvvrngnpptlhwhngqplreskiihveyyqegeisegcllfnkpthynnngnytlia<br/> knplgtanqtinghflkefpvde</p> <p><b>Proposed:</b> aliSize=91 (resi) RMSD=2.31 (Å)<br/> tv--YPPRVVSLLEELRLHCIEFVVRGNP--PPTLHLHNGOPLRESKI IHVEYyQEGEISEGCLFNKPTHYNNNGNYTLIAKNP--LGTANQ-TINGHFLKEFPVDE<br/> --eSVLTQPPSASGTPGQRV1-RVT1SCTIGSaTdigsnsviwyqqvpgkapklliyndllpsgvsdrfsasksgt--T-SASLAISGLESEDEADYCAWVNDsIDEPGFgGtKLTvLGqpk-----</p> |
| 508 | <p>1wwcA (105)</p> <hr/> <p>2yuvA (100)</p> | N | 12.00 | <p><b>TM-align:</b> aliSize=72 (resi) RMSD=2.01 (Å)<br/> tvyypprvvs leepelr-----LHCIEFVVRGNPPTLHLHNGOPLRESKI IHVEYyQEGEISEGCLFNKPTHYNNNGNYTLIAKnpLGTANQTINGHFLKEFPVDE<br/> -----gssgsgaafakildpayqvdkgGRVRFVVELADPKLEVKYKNGQEI RPS TKYIFEH-KG--CORIFINNCQMTDDSEYVITAG--DEKCS TELFVRS-----gpssg</p> <p><b>SARST:</b> aliSize=77 (resi) RMSD=10.34 (Å)<br/> tvyypprvvs-----LEELRLHCIEFVVRGNPPTLHLHNGOPLRESKI IHVEYyQEGEISEGCLFNKPTHYNNNGNYTLIAknplGTANQTINGH-----flkefpvde<br/> -----gssgsgaafaKILDPAyQVDKGGRVRFVVELADPKLEVKYKNGQEI RPS TKYIFEH-KG--CORIFINNCQMTDDSEYVITAG--DEKCS TELFVRS-----gpssg</p> <p><b>BLAST:</b> aliSize=26 (resi) iden=16.00% (16/100) simi=26.00% (26/100)<br/> tvyypprvvs leepelrhc-----IEFVVRGNPPTLHLHNGOPLRESKiihVEYyQEGEISEGCLFNKPTHYNNNGNYTLIA-----knplgtanqtinghflkefpvde<br/> -----gssgsgaafakildpayqvdkgGRVRFVVELADPKLEVKYKNGQEI RPS TKYIFEH-KG--CORIFINNCQMTDDSEYVITAG--DEKCS TELFVRS-----gpssg</p> <p><b>Proposed:</b> aliSize=86 (resi) RMSD=2.02 (Å)<br/> tv----YP-PRVVSLEELRLHCIEFVVRGNPPTLHLHNGOPLRESKI IHVEYyQEGEISEGCLFNKPTHYNNNGNYTLIAKnpLGTANQTINGHFLK-----epfpvde<br/> ---gssgSSgAAFAKIIDPAYQVDKGGRVRFVVELADPKLEVKYKNGQEI RPS TKYIFEH-KG--CORIFINNCQMTDDSEYVITAG--DEKCS TELFVRS-----gpssg</p>                               |
| 509 | <p>1wwcA (105)</p> <hr/> <p>2ywyA (113)</p> | N | 8.57  | <p><b>TM-align:</b> aliSize=80 (resi) RMSD=2.31 (Å)<br/> tvyypprvvs leepelr-----LHCIEFVVRGNPPTLHLHNGOPLRESKI IHVEYyQEGEISEGCLFNKPTHYNNNGNYTLIAKNP-----LGTANQTINGHFLKEFPVDE<br/> -----awdqtrsvtketgesltincalknaaddLERTDYRTt lgs tneqKISIGGRYVETV-NKG-SKSFSLRIRDLRVEDSGTKCGYFsdamsnysypIPGEGAGTVLTVKAA-----a</p> <p><b>SARST:</b> aliSize=90 (resi) RMSD=12.69 (Å)<br/> tv--YPPRVVSLLEELRLHCIEFVVRGNPPTLHLHNGOPLRESKI IHVEYyQEGEISEGCLFNKPTHYNNNGNYTLIAKN-----PLGTANQTI-----NGH--flkefpvde<br/> --AVDQTPRSVTKETGESLTINCALKNAADDLERTDYRTt lgs tneqKISIGGRYVETV-NKGSKSFSLRIRDLRVEDSGTKCGYFsdamsnysypIPGEGAGTVLTVKAA-----</p> <p><b>BLAST:</b> aliSize=10 (resi) iden=6.67% (7/105) simi=9.52% (10/105)<br/> awdqtrsvtketgesltincalknaaddLERTDYRTt lgs tneqKISIGGRYVETV-NKGSKSFSLRIRDLRVEDSGTKCGYFsdamsnysypIPGEGAGTVLTVKAA-----hciefvvrngnpptlhwhngqplreskiihveyyqegeisegcllfnkpthynnngnytliaknplgtanqtinghfl<br/> lkefpvde</p> <p><b>Proposed:</b> aliSize=91 (resi) RMSD=1.94 (Å)<br/> tvYPPRVVSLLEELRLHCIEFVVRGNPPP-TLHLHNGOPLRESKI IHVEYyQEGEISEGCLFNKPTHYNNNGNYTLIAKNP-----LGTANQ-TINGHFLK-epfpvde<br/> ---AVDQTPRSVTKETGESLTINCALKNAADDLERTDYRTt lgs tneqKISIGGRYVETV-NKG-SKSFSLRIRDLRVEDSGTKCGYFsdamsnysypIPGEGAGTVLTVKAA-----</p>                                  |

|     |                                       |   |       |                                                                                                                                                                                                                                                                                                                                                                                                                                                                                                                                                                                                                                                                                                                                                                                                                                                                                                                                                                                                                                                                                                                                                                                                                                                                                                                                                                                                                                                                                                                                                                                                                                                                                                                                                                                                                                                                |
|-----|---------------------------------------|---|-------|----------------------------------------------------------------------------------------------------------------------------------------------------------------------------------------------------------------------------------------------------------------------------------------------------------------------------------------------------------------------------------------------------------------------------------------------------------------------------------------------------------------------------------------------------------------------------------------------------------------------------------------------------------------------------------------------------------------------------------------------------------------------------------------------------------------------------------------------------------------------------------------------------------------------------------------------------------------------------------------------------------------------------------------------------------------------------------------------------------------------------------------------------------------------------------------------------------------------------------------------------------------------------------------------------------------------------------------------------------------------------------------------------------------------------------------------------------------------------------------------------------------------------------------------------------------------------------------------------------------------------------------------------------------------------------------------------------------------------------------------------------------------------------------------------------------------------------------------------------------|
| 510 | <p>1wwcA (105)</p> <p>2ywwA (111)</p> | N | 8.57  | <p><b>TM-align:</b> aliSize=78 (resi) RMSD=2.02 (Å)<br/>       tvyypprvvsleepel-----LHCHVVR-GNPPP-TLHHLHN-----GOPLRESKI IHVEYyOEFELSEGCLFNKPTHYNNNYTLIAKNPL-----GTANQ-TINGHfLkefpvde<br/>       -----awwdqtprtitketESLTKVLDKHSGLSSTTYRTqlgstneKTIISIGGRYDETV-DKGSKFSRISDLRVEDSITKCOADYSPscysysleSAVEGaGTVLTVK-----</p> <p><b>SARST:</b> aliSize=91 (resi) RMSD=12.76 (Å)<br/>       tv-YYPPrVVSLEEP--ELRLEHCHVVRGNPPP-TLHHLHN-----OPLRESKI IHVEYyOEFELSEGCLFNKPTHYNNNYTLIAKNPL-----GTANOT---INGH--flkefpvde<br/>       --aWVDQTPRTITKEtESLTKVLDKHSGLSSTTYRTQlsgstneKTIISIGGRYDETV-DKGSKFSRISDLRVEDSITKCOADYSPscysysLESAGEgagTVLTVK-----</p> <p><b>BLAST:</b> aliSize=8 (resi) iden=4.76% (5/105) simi=7.62% (8/105)<br/>       tvyypp-----PRVVSLEPEELRLEHCHVLDKHSGLSSTTYRTqlgstneKTIISIGGRYDETV-DKGSKFSRISDLRVEDSITKCOADYSPscysysleSAVEgagTVLTVK-----efvvrngnpptlhwhngqplreskiihveyyqegeisegcllfnkpthynnngnytliaknplgtanqtinghf<br/>       -----awwdqtprtitketESLTKVLDKHSGLSSTTYRTqlgstneKTIISIGGRYDETV-DKGSKFSRISDLRVEDSITKCOADYSPscysysleSAVEgagTVLTVK-----<br/>       lkefpvde<br/>       -----</p> <p><b>Proposed:</b> aliSize=91 (resi) RMSD=1.93 (Å)<br/>       tvyYPPRVVS-LEEP-ELR-LEHCHVVR-GNPPP-TLHHLHN-----GOPLRESKI IHVEYyOEFELSEGCLFNKPTHYNNNYTLIAKNPL-----GTANQ-TINGHFLkefpvde<br/>       ---AWVDQTPRTITKEtESLTKVLDKHSGLSSTTYRTqlgstneKTIISIGGRYDETV-DKGSKFSRISDLRVEDSITKCOADYSPscysysleSAVEGaGTVLTVK-----</p>                                                                                                                                                                                                                                                                                                                                                                                                                                    |
| 511 | <p>1wwrA (154)</p> <p>1wkqB (155)</p> | C | 29.87 | <p><b>TM-align:</b> aliSize=111 (resi) RMSD=2.07 (Å)<br/>       gshmgKLYLVALREAKRAFEK-EVIVGAIIVKEEELISKAHNSVEELKDPATAHAEMLAKEACRRNTKYEGEELYVTLEPCIMCSYALVLSRIEKVIFSLDK---K---HGgvSVFn-Identlnhrvkweyvpleeasellseffkklrnnii-----<br/>       ----NHITELRAVTLACEGVNAGIGGFAGAVLVKDGALAEQONNVTTSNDPTAHAEVTAIRKACKVAGAYQDDITLYTSCPCPCPLGAIYWARPKAFYAEHTdaaeAGFDDSFYKEIDKPAEERT-----IPFYQVTITHLSPFQAWRnfankkey-----<br/>       -----<br/>       nfankkey</p> <p><b>SARST:</b> aliSize=136 (resi) RMSD=15.57 (Å)<br/>       gshmg-KLYLVALREAKRAFEK-EVIVGAIIVKEEELISKAHNSVEELKDPATAHAEMLAKEACRRNTKYEGEELYVTLEPCIMCSYALVLSRIEKVIFSLDK---KHGGVSVV----FNILDEPTlnhrVKWEYYPLEASELSEFF-----kklrnnii<br/>       ----nhITELRAVTLACEGVNAGIGGFAGAVLVKDGALAEQONNVTTSNDPTAHAEVTAIRKACKVAGAYQDDITLYTSCPCPCPLGAIYWARPKAFYAEHTdaaeAGFDDSFYKEIDKPAEERT-----IPFYQVTITHLSPFQAWRnfankkey-----</p> <p><b>BLAST:</b> aliSize=80 (resi) iden=35.06% (54/154) simi=51.95% (80/154)<br/>       gshmgk--LYLVALREAKRAFEK-EVIVGAIIVKEEELISKAHNSVEELKDPATAHAEMLAKEACRRNTKYEGEELYVTLEPCIMCSYALVLSRIEKVIFSLDK---LDKKGgvSVV----VFNILDEPTlnhrVKWEYYPLEASELSEFFKCLR-----nii<br/>       ----nhITELRAVTLACEGVNAGIGGFAGAVLVKDGALAEQONNVTTSNDPTAHAEVTAIRKACKVAGAYQDDITLYTSCPCPCPLGAIYWARPKAFYAEHTdaaeAGFDDSFYKEIDKPAEERTI---PFYQV-TLTHLSPFQAWRnfankkey---</p> <p><b>Proposed:</b> aliSize=133 (resi) RMSD=1.56 (Å)<br/>       gshmgKLYLVALREAKRAFEK-EVIVGAIIVKEEELISKAHNSVEELKDPATAHAEMLAKEACRRNTKYEGEELYVTLEPCIMCSYALVLSRIEKVIFSLDK---KHGGVSVVFNIL-DePTlnhrVKWEYYPLEASELSEFFKCLR-nii<br/>       ----NHITELRAVTLACEGVNAGIGGFAGAVLVKDGALAEQONNVTTSNDPTAHAEVTAIRKACKVAGAYQDDITLYTSCPCPCPLGAIYWARPKAFYAEHTdaaeagfddsfyke-----IDKPAeEr-----TIPFYQVTITHLSPFQAWRNF--AKkey-</p>                                                                                                                                     |
| 512 | <p>1wwrA (154)</p> <p>3b8fB (142)</p> | C | 14.08 | <p><b>TM-align:</b> aliSize=107 (resi) RMSD=3.23 (Å)<br/>       gshmgKEYFLKVALREAKRAFEKGeVPVGAIVKGEELISKAHNSVEELKDPATAHAEMLAKEACRRlnTkyLeGCELYVT-----EPCIMCSYALVSR-IEKVIIFsALdkkhggv-----Vsvf---NILDEPTL---N--Hrvkweypleeasellseffkklrnnii-----<br/>       --LNI EQLYDVKQLIEQRYPN-DWGAAIRVEDTITYSVAP-DVINasTEL-CMETGAILLEAHKFKQ-K--K-VTHSIClarenehse lkvISPCGVCQERFYWGPEVQCAI-TN-----akqdi i f k l k e l q p y h w t e a y h d e m v k e w s t r</p> <p><b>SARST:</b> aliSize=100 (resi) RMSD=6.31 (Å)<br/>       gshmgk--EYFLKVALREAKRAFEKGeVPVGAIVK--EELISKAHNSVEELKDPATAH-AEMLAKEACRRlnTYLEGCELYVT-----EPCIMCSYALVSRIEKVIIFsALDKKHG-----gvsvfnilddeptlnhrvkweypleeasellseffkkl<br/>       -----lnIEQLYDVKQLIEQRYPN-DWGAAIRVEDTITYSVAP---VINASTEICMETGAILLEAHKFKQVTHSIClarenehse lkvISPCGVCQERFYWGPEVQCA-ITNAKQDi i f k p l k e l q p y h w t e a y h d e m v k e w s t r</p> <p>l r n n i i<br/>       -----</p> <p><b>BLAST:</b> aliSize=26 (resi) iden=14.79% (21/142) simi=18.31% (26/142)<br/>       gshmgkeyflkvalreakrafekgevpvg-----AVKGEELISKAHNSVEELKDPATAHAEMLAKEACRRlnTYLEGCELYVT-----EPCIMCSYALVSR-IEKVIIFsALDKKHG-----vlsriekvifsaldkk<br/>       -----lnieqlydvkqliEQRYPN-DWGAAIRVEDTITYSVAP-DVINASTELC-METGAILLEAHKFKQVTHSIClarenehse lkvISPCGVCQERFYWGPEVQCAInakqdi i f k p l k e l q p y h w t e a y h d e m v k e w s t r</p> <p>hggvsvfnilddeptlnhrvkweypleeasellseffkklrnnii<br/>       -----</p> <p><b>Proposed:</b> aliSize=114 (resi) RMSD=2.80 (Å)<br/>       gshmgKEYFLKVALREAKRAFEKGeVPVGAIVKGEELISKAHNSVEELKDPATAHAEMLAKEACRRlnTkyLeGCELYVT-----EPCIMCSYALVSR-IEKVIIFsALdkkhggvsvfnilddeptL-----nhrvkweYYPLeEASELSEFFKCLR-nii<br/>       --LNI EQLYDVKQLIEQRYPN-DWGAAIRVEDTITYSVAP---DVInasTEL-CMETGAILLEAHKFKQ-VTHSIClarenehse lkvISPCGVCQERFYWGPEVQCA-----ITNAKQDi i f k p l k e l q p y h w t e a y h d e m v k e w s t r</p> |

|     |                                       |   |       |                                                                                                                                                                                                                                                                                                                                                                                                                                                                                                                                                                                                                                                                                                                                                                                                                                                                                                                                                                                                                                                                                                                                                                                                                                                                                                                                                                                                                                                                                                                                                                                                                                                                                                      |
|-----|---------------------------------------|---|-------|------------------------------------------------------------------------------------------------------------------------------------------------------------------------------------------------------------------------------------------------------------------------------------------------------------------------------------------------------------------------------------------------------------------------------------------------------------------------------------------------------------------------------------------------------------------------------------------------------------------------------------------------------------------------------------------------------------------------------------------------------------------------------------------------------------------------------------------------------------------------------------------------------------------------------------------------------------------------------------------------------------------------------------------------------------------------------------------------------------------------------------------------------------------------------------------------------------------------------------------------------------------------------------------------------------------------------------------------------------------------------------------------------------------------------------------------------------------------------------------------------------------------------------------------------------------------------------------------------------------------------------------------------------------------------------------------------|
| 513 | <p>1wwrA (154)</p> <p>3b8fC (140)</p> | C | 14.29 | <p><b>TM-align:</b> aliSize=106 (resi) RMSD=3.28 (Å)<br/> gshMGKEFLKALREAKRAFEKGEVPGVATIVKGEIISKAHNSVEELK--DPTaHAMLAKKACRRlntkyLEGCFLYVT-----EPCIMCSYAVISRI--EKVIFsALDkkggv-----Vsvf---NILDEPTLN-----HRvkweyypleasellseffkklrnnii-----<br/> ---NI EQQLYDVKQLIEQRYPN-DWGAARVVDGTIYTSVAP-DVINasTEL-CMTGALFAHKFQ----KkVTHSIClarenehsekvLSPGVCQERLF-YWGpeVQCAI-TNA-----kqdiifk---plkELQPYHWTayhdeMV-----kewst</p> <p><b>SARST:</b> aliSize=92 (resi) RMSD=7.44 (Å)<br/> gshmgk-EYFLKVALREAKRAFEKGEVPGVATIVKGEIISKAHNSVEELKDPtah-AEMLAIKEACRRlntkyLEGCFLYVT-----EPCIMCSYAVISRI--EKVIFsALDkkggvsvfnideptlnhrvkweyypleasell<br/> -----nIEQQLYDVKQLIEQRYPN-DWGAARVVDGTIYTSVAPD---VINASTEICMETGAILFAHKFQKVTHTSICARENehselkvLSPGVCQERLFYWGpeVQCAInAKQDIIFKplkelqpyhwtayhdeMVkewst-----<br/> seffkklrnnii</p> <p><b>BLAST:</b> aliSize=26 (resi) iden=15.00% (21/140) simi=18.57% (26/140)<br/> gshmgkeyflkvalreakrafekgevpvg-----nIEQQLYDVKQLIEQRYPN-DWGAARVVDGTIYTSVAPD---VINASTEICMETGAILFAHKFQKVTHTSICARENehselkvLSPGVCQERLFYWGpeVQCAInAKQDIIFKplkelqpyhwtayhdeMVkewst-----vlsriekvifsaldkkkg<br/> -----nieqqlYdvkqliEQrypnDwGaaARVVDGTIYTSVAPD---VINASTEICMETGAILFAHKFQKVTHTSIClarenehsekvLSPGVCQERLFYWGpeVQCAInakqdiifkplkelqpyhwtayhdeMVkewst-----<br/> vsvfnideptlnhrvkweyypleasellseffkklrnnii</p> <p><b>Proposed:</b> aliSize=114 (resi) RMSD=2.88 (Å)<br/> gshMGKEFLKALREAKRAFEKGEVPGVATIVKGEIISKAHNSVEELK--DPTaHAMLAKKACRRlntkyLEGCFLYVT-----EPCIMCSYAVISRI--EKVIFsALDkkggvsvfnideptlnhrvkweyypleasellseffkklrnnii<br/> ---NI EQQLYDVKQLIEQRYPN-DWGAARVVDGTIYTSVAPD---VINASTEICMETGAILFAHKFQKVTHTSICARENehselkvLSPGVCQERLFYWGpeVQCAInAKQDIIFKplkelqpyhwtayhdeMVkewst-----QPYH-WTEAYHDEMVEWS-T--</p> |
| 514 | <p>1wwzA (157)</p> <p>lqsmA (150)</p> | C | 18.00 | <p><b>TM-align:</b> aliSize=135 (resi) RMSD=2.80 (Å)<br/> mDEIKIEKLKIDkkALNELIDVYMSGYEGLeYgGEGrdYARNYIKWCWKASDGFVAKV---GDKIVGFTVCDkDWFSkyEGR-IVGALHEFVVDKKFQGGKIGRKLITCLDFLG-YNDTIELWVGKKNYGAMNLYEFKFK-VGKSgiwrmikrq----<br/> --DNITVRFVTE-N--DKEGWQRLWKSQDFY---VS---FPDdLDDFNFRGfLdpnIKM-WAAVAVEssSEKIIIGMNFN-NHMTT-WDFkDKIY--INDLYVDENSRVKGAGKLIQFVYDEADLGTSPSVYWCDESnhRAQLLYVVGyApKIlyk-----rkgy</p> <p><b>SARST:</b> aliSize=132 (resi) RMSD=6.39 (Å)<br/> mdeikieklkld-----KALNELIDVYMSGYEGLeYgGEGrdYARNYIKWCWKASDGFVAKV---GDKIVGFTVCDkDWFSkyEGRIVGALHEFVVDKKFQGGKIGRKLITCLDFLG-YNDTIELWVGKKNYGAMNLYEFKFK-VGKSgiwrmikrq<br/> -----dnitvrfvtendKEGWQRLWKSQDFY---VS---FPDdLDDFNFRGfLdpnIKM-WAAVAVEssSEKIIIGMNFN-NHMTT-WDFkDKIY--INDLYVDENSRVKGAGKLIQFVYDEADLGTSPSVYWCDESnhRAQLLYVVGyApKIlyk-----<br/> VGYApKIlykrygy</p> <p><b>BLAST:</b> aliSize=61 (resi) iden=26.67% (40/150) simi=40.67% (61/150)<br/> mDEIKIEKLKIDkkALNELIDVYMSGYEGLeYgGEGrdYARNYIKWCWKASDGFVAKV---GDKIVGFTVCDkDWFSkyEGRIVGALHEFVVDKKFQGGKIGRKLITCLDFLG-YNDTIELWVGKKNYGAMNLYEFKFK-VGKSgiwrmikrq<br/> --DNITVRFVTE-N--DKEGWQRLWKSQDFY---VS---FPDdLDDFNFRGfLdpnIKM-WAAVAVEssSEKIIIGMNFN-NHMTT-WDFkDKIY--INDLYVDENSRVKGAGKLIQFVYDEADLGTSPSVYWCDESnhRAQLLYVVGyApKIlykrygy-----</p> <p><b>Proposed:</b> aliSize=137 (resi) RMSD=2.54 (Å)<br/> md-EIKIEKLKIDkkALNELIDVYMSGYEGLeYgGEGrdYARNYIKWCWKASDGFVAKV---GDKIVGFTVCDkDWFSkyEGR-IVGALHEFVVDKKFQGGKIGRKLITCLDFLG-YNDTIELWVGKKNYGAMNLYEFKFK-VGKSgiwrmikrq<br/> --dnITVRFVTE-N--DKEGWQRLWKSQDFY---VS---FPDdLDDFNFRGfLdpnIKM-WAAVAVEssSEKIIIGMNFN-NHMTT-WDFkDKIY--INDLYVDENSRVKGAGKLIQFVYDEADLGTSPSVYWCDESnhRAQLLYVVGyApKIlykrygya-----</p>                                         |
| 515 | <p>1wwzA (157)</p> <p>lqsmB (149)</p> | C | 19.46 | <p><b>TM-align:</b> aliSize=137 (resi) RMSD=2.85 (Å)<br/> mDEIKIEKLKIDkkALNELIDVYMSGYEGLeYgGEGrdYARNYIKWCWKASDGFVAKV---GDKIVGFTVCDkDWFSkyEGR-IVGALHEFVVDKKFQGGKIGRKLITCLDFLG-YNDTIELWVGKKNYGAMNLYEFKFK-VGKSgiwrmikrq----<br/> --DNITVRFVTE-N--DKEGWQRLWKSQDFY---VS---FPDdLDDFNFRGfLdpnIKM-WAAVAVEssSEKIIIGMNFN-NHMTT-WDFkDKIY--INDLYVDENSRVKGAGKLIQFVYDEADLGTSPSVYWCDESnhRAQLLYVVGyApKIlyk-----rkgy</p> <p><b>SARST:</b> aliSize=131 (resi) RMSD=6.49 (Å)<br/> mdeikieklkld-----KALNELIDVYMSGYEGLeYgGEGrdYARNYIKWCWKASDGFVAKV---GDKIVGFTVCDkDWFSkyEGRIVGALHEFVVDKKFQGGKIGRKLITCLDFLG-YNDTIELWVGKKNYGAMNLYEFKFK-VGKSgiwrmikrq<br/> -----nitvrfvtendKEGWQRLWKSQDFY---VS---FPDdLDDFNFRGfLdpnIKM-WAAVAVEssSEKIIIGMNFN-NHMTT-WDFkDKIY--INDLYVDENSRVKGAGKLIQFVYDEADLGTSPSVYWCDESnhRAQLLYVVGyApKIlykrygy-----<br/> VGYApKIlykrygy</p> <p><b>BLAST:</b> aliSize=60 (resi) iden=26.17% (39/149) simi=40.27% (60/149)<br/> mdeIKIEKLKIDkkALNELIDVYMSGYEGLeYgGEGrdYARNYIKWCWKASDGFVAKV---GDKIVGFTVCDkDWFSkyEGR-IVGALHEFVVDKKFQGGKIGRKLITCLDFLG-YNDTIELWVGKKNYGAMNLYEFKFK-VGKSgiwrmikrq<br/> ---dnITVRFVTE-N--DKEGWQRLWKSQDFY---VS---FPDdLDDFNFRGfLdpnIKM-WAAVAVEssSEKIIIGMNFN-NHMTT-WDFkDKIY--INDLYVDENSRVKGAGKLIQFVYDEADLGTSPSVYWCDESnhRAQLLYVVGyApKIlykrygy-----</p> <p><b>Proposed:</b> aliSize=140 (resi) RMSD=2.74 (Å)<br/> md-EIKIEKLKIDkkALNELIDVYMSGYEGLeYgGEGrdYARNYIKWCWKASDGFVAKV---GDKIVGFTVCDkDWFSkyEGR-IVGALHEFVVDKKFQGGKIGRKLITCLDFLG-YNDTIELWVGKKNYGAMNLYEFKFK-VGKSgiwrmikrq<br/> --dnITVRFVTE-N--DKEGWQRLWKSQDFY---VS---FPDdLDDFNFRGfLdpnIKM-WAAVAVEssSEKIIIGMNFN-NHMTT-WDFkDKIY--INDLYVDENSRVKGAGKLIQFVYDEADLGTSPSVYWCDESnhRAQLLYVVGyApKIlykrygya-----</p>                                    |

|     |                                                     |   |       |                                                                                                                                                                                                                                                                                                                                                                                                                                                                                                                                                                                                                                                                                                                                                                                                                                                                                                                                                                                                                                                                                                                                                                                                                                                                                                                                                                                                                                                                                                                                                                                                                                                                                                     |
|-----|-----------------------------------------------------|---|-------|-----------------------------------------------------------------------------------------------------------------------------------------------------------------------------------------------------------------------------------------------------------------------------------------------------------------------------------------------------------------------------------------------------------------------------------------------------------------------------------------------------------------------------------------------------------------------------------------------------------------------------------------------------------------------------------------------------------------------------------------------------------------------------------------------------------------------------------------------------------------------------------------------------------------------------------------------------------------------------------------------------------------------------------------------------------------------------------------------------------------------------------------------------------------------------------------------------------------------------------------------------------------------------------------------------------------------------------------------------------------------------------------------------------------------------------------------------------------------------------------------------------------------------------------------------------------------------------------------------------------------------------------------------------------------------------------------------|
| 516 | <p><b>1wwzA (157)</b></p> <p><b>1qsmD (152)</b></p> | C | 19.74 | <p><b>TM-align: aliSize=139 (resi) RMSD=2.84 (Å)</b><br/> M-DEIKIEKLkK1DkKALNELIDVYMSGYEGLeygGEGRYARNYIKWCW-K--KASdGFFVAKV--GDKIVGFI VCDkDWFsKyEGR-IVGAIHEFVVDKKFOGKIGRKLITCLDFLGK-YNDTIELWVGEKNYGAMNLYEKFGFK-VGKSGIwvrmiqrq----<br/> SeNITVRFV-T-E-NDKEGWQRLWKSYODFYF---VSFPDLDDFNFRFLDpnIKM-WAAAVEssSEKIIIGMNFN-NHMIT-WDFkDKIYINDLYVDENSRVKGAGKLIQFVYDEADKIGTPSVYWCTDESNRHQLLVVVGKApKILYK-----rkgy</p> <p><b>SARST: aliSize=139 (resi) RMSD=5.25 (Å)</b><br/> mde----KIEKLkK1DkKALNELIDVYMSGYEGLeygGEGRYARNYIKWCWKAASDGFVAKV---GDKIVGFI VCDkDWFsKYEGRIVGAIHEFVVDKKFOGKIGRKLITCLDFLGK-YNDTIELWVGEKNYGAMNLYEKfgfkVgKSGIWRMI----krq<br/> ---sednITVRFV---TENDKEGWQRLWKSYQ---DFYEVSFPLDDFNFRFLDpnIKMWA--VAvesSEKIIIGMNFN-NHMITWDFKDIYINDLYVDENSRVKGAGKLIQFVYDEADKLGTPSVYWCTDESNRHQLLVV---VGYKAPKILYkrqgy---</p> <p><b>BLAST: aliSize=61 (resi) iden=26.32% (40/152) simi=40.13% (61/152)</b><br/> m--DEIKIEKLKkLdKkALNELIDVYMSGYEGL---GEEYgGEGRYARNYIKWCWKAASdGfVAKVGDKIVGFI VCDKDFs-KYEGRIVGAIHEFVVDKKFOGKIGRKLITCLDFLGKYNDTIELWVGEKNYGAMNLYEKFGFK-----kvgksgIwvrmiqrq<br/> -seNITVRFVTENDKEGWQRLWKSQODFYFvsfpdLDDFNFRFLDpnIKMWA--VA--VESSEKIIIGMNFN-NHMITWDFKDIYINDLYVDENSRVKGAGKLIQFVYDEADKIGTPSVYWCTDESNRHQLLVVVGKApkilykrqgy-----</p> <p><b>Proposed: aliSize=142 (resi) RMSD=2.68 (Å)</b><br/> M-DEIKIEKLkK1DkKALNELIDVYMSGYEGLeygGEGRYARNYIKWCW-K--KASdGFFVAKV--GDKIVGFI VCDkDWFsKyEGR--IVGAIHEFVVDKKFOGKIGRKLITCLDFLGK-YNDTIELWVGEKNYGAMNLYEKFGFKVgKSGIWRMIKRQ--a<br/> SeNITVRFV-T-E-NDKEGWQRLWKSYODFYF---SFPDLDDFNFRFLDpnIKMWA--AA--VAvesSEKIIIGMNFN-NHMIT--TWDFkDKIYINDLYVDENSRVKGAGKLIQFVYDEADKIGTPSVYWCTDESNRHQLLVVVGK---APKILYKRKGya-</p>                                                |
| 517 | <p><b>1wwzA (157)</b></p> <p><b>1s3zB (145)</b></p> | C | 12.41 | <p><b>TM-align: aliSize=135 (resi) RMSD=2.78 (Å)</b><br/> mdeIKIEKLkK1DkKALNELIDVYMSGYEGLeygGEGRYARNYIKWCW-KKASDGFVAKVGDKIVGFI VCDkDWFsK-Y--EGRI VGIHEFVVDKKFOGKIGRKLITCLDFLGK-YNDTIELWVGEKNYGAMNLYEKFGFKVgKSGIwvrmiqrq----<br/> ---MDIRQMN--T--HIEHWRGLRKQ-L-----WPGHPDAHLADGEEILQADHLASITAMADGVAIGFADAS-IRHDYvNgcDSSPVVLEGI FLPSELRORVAKQLIAAVQRWGTnkGCREMASDTSPEITISQKVHQUALGFEETERVIF-----yrkrcc</p> <p><b>SARST: aliSize=140 (resi) RMSD=5.62 (Å)</b><br/> mdei-KIEKLkK1DkKALNELIDVYMSGYEGLeygGEGRYARNYIKWCWKAASDGFVAKVGDKIVGFI V--CDKDFsKYEGRI VGIHEFVVDKKFOGKIGRKLITCLDFLGK-YNDTIELWVGEKNYGAMNLYEKFGFKVgKsgIWRMIKR-q<br/> ---mDIRQM--NKT--HIEHWRGLRKQL-----WPGHPDAHLADGEEILQADHLASITAMADGVAIGFADASIRHDYVNGDSSPVVLEGI FLPSELRORVAKQLIAAVQRWGTnkGCREMASDTSPEITISQKVHQUALGFEETERVIF--VIFYRKRc-</p> <p><b>BLAST: aliSize=37 (resi) iden=15.17% (22/145) simi=25.52% (37/145)</b><br/> mdeikieklkklldkkaInelidvymsgyegleeyggEGRYARNYIKWCWKAASD-----GFFVAKV-GDKIVGFI VCDKDFsKYEGRI VGIHEFVVDKKFOGKIGRKLITCLDFLGK-YNDTIELWVGEKNYGAMNLYEKFGFKVgKsgIWRMIKR-q<br/> -----mdirqmKthlehwrglrqkqwpghpdahladgeeilqadhlasiamadgvaigfadasirhdYvngcDSSPVVLEGI FLPSELRORVAKQLIAAVQRWGTnkGCREMASDTSPEITISQKVHQUALGFEETERVIF--VIFYRKRc-<br/> MNLVYKFGFKK-----vkgksgIwvrmiqrq<br/> QKVHQUALGFEETERVIFyrkrcc-----</p> <p><b>Proposed: aliSize=140 (resi) RMSD=2.44 (Å)</b><br/> mdeIKIEKLkK1DkKALNELIDVYMSGYEGLeygGEGRYARNYIKWCWKAASDGFVAKVGDKIVGFI VCDkDWFsKY---EGRI VGIHEFVVDKKFOGKIGRKLITCLDFLGK-YNDTIELWVGEKNYGAMNLYEKFGFKVgKsgIWRMIKRQ-a<br/> ---MDIRQM-NKT--HIEHWRGLRKQL--P---GHPDAHLADGEEILQADHLASITAMADGVAIGFADAS-IRHDYvngcDSSPVVLEGI FLPSELRORVAKQLIAAVQRWGTnkGCREMASDTSPEITISQKVHQUALGFEETERVIFYRKRc-</p> |
| 518 | <p><b>1wwzA (157)</b></p> <p><b>1z4eA (150)</b></p> | C | 17.33 | <p><b>TM-align: aliSize=138 (resi) RMSD=3.10 (Å)</b><br/> mdeIKIEKLkK1DkKALNELIDVYMSGYEGLeygGEGRYARNYIKWCW-K--KASdGFFVAKVGDKIVGFI VCDKDFsKY-EGRI VGIHEFVVDKKFOGKIGRKLITCLDFLGK-YNDTIELWVGEKNYGAMNLYEKFGFK-VGKSGIwvrmiqrq--<br/> --HVTIREA-T-E-GDIEQMVHMLAD-D-VGR-KRERYekp1PVSYVRAFKEIKdKnNE--LIVACNGEEIVGMLQVTFPTYLT-yQSWRATIEGVRTHSAARQGIQSOLVCWAIERAKERGCHLQITTDKORPDALRFYQLGFKASHEGLKM-----hf</p> <p><b>SARST: aliSize=132 (resi) RMSD=5.46 (Å)</b><br/> mdeikieklkklldkkaIn-----ELIDVYMSGYEGLeygGEGRYARNYIKWCWKAASDGFVAKVGDKIVGFI VCDkDWFsKYEGRI VGIHEFVVDKKFOGKIGRKLITCLDFLGKYNDTIELWVGEKNYGAMNLYEKFGFKVgKsgIWRMIKR-q<br/> -----hvtireategdLEQMVHMLADDVGRKRERYEKPLPVSYVRAFKEIKdKNNELIVACNGEEIVGMLQVTFPTYLT-yQSWRATIEGVRTHSAARQGIQSOLVCWAIERAKERGCHLQITTDKORPDALRFYQLGFKASHEGLKMhf-</p> <p><b>BLAST: aliSize=46 (resi) iden=17.33% (26/150) simi=30.67% (46/150)</b><br/> mdeikieklkklldkkaInelidvymsgyegleeyggEGRYARNYIKWCWKAASDGFVAKVGDKIVGFI VCDKDFsKYEGRI VGIHEFVVDKKFOGKIGRKLITCLDFLGKYN-DTIELWVGEKNYGAMNLYEKFGFK-----<br/> -----hvtireategdleqmvhmladdvgrkreryekplpvsVYRAF-KEIKdKNNELIVACNGEEIVGMLQVTFPTYLT-yQSWRATIEGVRTHSAARQGIQSOLVCWAIERAKERGCHLQITTDKORPDALRFYQLGFKASHEGLKMhf-<br/> -kvgksgIwvrmiqrq<br/> f-----</p> <p><b>Proposed: aliSize=136 (resi) RMSD=2.32 (Å)</b><br/> mdeIKIEKLkK1DkKALNELIDVYMSGYEGLeygGEGRYARNYIKWCW-K--KASdGFFVAKVGDKIVGFI VCDkDWFs-kyeG--R-IVGAIHEFVVDKKFOGKIGRKLITCLDFLGK-YNDTIELWVGEKNYGAMNLYEKFGFKVgKsgIWRMIKRQa<br/> --HVTIREA--TE-GDIEQMVHMLAD-D-VGRK--RERYekp1PVSYVRAFKEIKdKnNE--LIVACNGEEIVGMLQVTFPTYLT---TyqGswRATIEGVRTHSAARQGIQSOLVCWAIERAKERGCHLQITTDKORPDALRFYQLGFKAS--S-HEGLKMHF-</p>                                                      |

|     |                                             |   |       |                                                                                                                                                                                                                                                                                                                                                                                                                                                                                                                                                                                                                                                                                                                                                                                                                                                                                                                                                                                                                                                                                                                                                                                                                                                                                                                                                                                                                                                                                                                                                                                                                                                                                                                                                                                                                                                           |
|-----|---------------------------------------------|---|-------|-----------------------------------------------------------------------------------------------------------------------------------------------------------------------------------------------------------------------------------------------------------------------------------------------------------------------------------------------------------------------------------------------------------------------------------------------------------------------------------------------------------------------------------------------------------------------------------------------------------------------------------------------------------------------------------------------------------------------------------------------------------------------------------------------------------------------------------------------------------------------------------------------------------------------------------------------------------------------------------------------------------------------------------------------------------------------------------------------------------------------------------------------------------------------------------------------------------------------------------------------------------------------------------------------------------------------------------------------------------------------------------------------------------------------------------------------------------------------------------------------------------------------------------------------------------------------------------------------------------------------------------------------------------------------------------------------------------------------------------------------------------------------------------------------------------------------------------------------------------|
| 519 | <p>1wwzA (157)</p> <hr/> <p>2g3tA (169)</p> | C | 15.29 | <p><b>TM-align:</b> aliSize=136 (resi) RMSD=2.80 (Å)<br/> mdETKLEKLLKIDkkALNELIDVYMSGYEGLEEEyGGRDYArNy-IK-WCW---KKASdgFFVAKVGD-----KIVGFIVCDkDWFSkyEGRIVGAITHEVVDKKFOCKGIGRKLITCLDFLGK-YNDTIELWVGEKLYGAMNLYEKFVFKKVG---KSGIwrmikrq-----<br/> --KFVLRPATA-A--DCSDILRLIKELAKYEYM--EQVIL-TE-kDLIEDGfgehPFYH--CLVAEVPKehwtpeghSIVGFHMY-FTYDPWIGKLLYLEDVFMMSDYRCFGIGSEIKNLSQVAMRCSSMHFLAFAWNEPSINFYKRRASDLSseegWRLF-----kidkeyllkmat</p> <p><b>SARST:</b> aliSize=121 (resi) RMSD=4.90 (Å)<br/> mdeikielkkld-----KKALNELIDVYMSGYEGLEEEyGGRDYArNyIKWCWKKASDGFFVAKVGD-----KIVGFIVCDkDWFSkyEIVGAITHEVVDKKFOCKGIGRKLITCLDFLGKYN-DTIELWVGEKLYGAMNLYEKFVFKK-----<br/> -----kfvirpataadCSIDLRLIKELAKYEYMEEQVILT-----EKDLEDFGGEHPfyhclvaEVPKEHwtpeghSIVGFHMY-FTYDPWI--KLLYLEDVFMMSDYRCFGIGSEIKNLSQVAMRCrCSSMHFLAFAWNEPSINFYKRRASDLSseegwrlfkidkeyllkmat</p> <p>--gksGIwrmikrq<br/> ee-----</p> <p><b>BLAST:</b> aliSize=45 (resi) iden=14.65% (23/157) simi=28.66% (45/157)<br/> mdeikielkkldkkaalnelidvymsgyegleeyggegrdyarnyikwcwkksdgffvakv-----DKIVGFIVcdkdWFSKTE---RIVgAITHEVVDKKFOCKGIGRKLITCLDFLGKYN-DTIELWVGEKLYGAMNLYEKFVFKK-----<br/> -----kfvirpataadcsdilrlikelakeyemeeqviltekdllledgfgehpfyhclvaevpkewtpeghSIVGFHMY-FTYDPWI--KLLYLEDVFMMSDYRCFGIGSEIKNLSQVAMRCrCSSMHFLAFAWNEPSINFYKRRASDLSseegwrlfkidkeyllkmat</p> <p>ELWVGEKLYGAMNLYEKFVFKKVGKSGIwrmikrq-----<br/> HFLAFAWNEPSINFYKRRASDLSSEEGWRLFidkeyllkmat</p> <p><b>Proposed:</b> aliSize=140 (resi) RMSD=2.31 (Å)<br/> mdETKLEKLLKIDkkALNELIDVYMSGYEGLEEEyGGRDYArNyIKWCW---KKASdgFFVAKVGD-----KIVGFIVCDkDWFSkyEG-RIVGAITHEVVDKKFOCKGIGRKLITCLDFLGK-YNDTIELWVGEKLYGAMNLYEKFVFKKVGKSG-IWVRMIKRO-----a<br/> --KFVLRPATA-TAA--DCSDILRLIKELAKYEYM--EQVIL-TEkd--LledG-fgehPFYH--CLVAEVPKehwtpeghSIVGFHMY-FTYD--PWIGKLLYLEDVFMMSDYRCFGIGSEIKNLSQVAMRCrCSSMHFLAFAWNEPSINFYKRRASDLS-SEEGWRLFkIDkeyllkmat</p> |
| 520 | <p>1wx7A (106)</p> <hr/> <p>1wx8A (96)</p>  | N | 35.42 | <p><b>TM-align:</b> aliSize=81 (resi) RMSD=2.01 (Å)<br/> gssgssgspapV-----QDPHLIKVTKPKKEDFSVTDCTIQQLKEETSQRFKAHPDQLVLIAGKILKDPSSAACVVRDGLVHLLIKRQ--H-RAmgnecpasgpgssg<br/> -----gssgssgvsgrEPPSSRIIRVSVKTPQDCHFLAENSNVRRFKQISKYLHCNADRLVLIFTGKILRQDILSORGILDCSTVHVVRSHsgPsSG-----</p> <p><b>SARST:</b> aliSize=86 (resi) RMSD=6.15 (Å)<br/> gs-----SGSSGSPAPVQDPHLIKVTKPKKEDFSVTDCTIQQLKEETSQRFKAHPDQLVLIAGKILKDPSSAACVVRDGLVHLLIKRQHRAmgnecpasgpgssg<br/> --gssgssgVSGREPSSRIIRVSVKTPQDCHFLAENSNVRRFKQISKYLHCNADRLVLIFTGKILRQDILSORGILDCSTVHVVRSHsgPsSG-----</p> <p><b>BLAST:</b> aliSize=67 (resi) iden=48.96% (47/96) simi=69.79% (67/96)<br/> GSSGSSGSPAPVQDPHLIKVTKPKKEDFSVTDCTIQQLKEETSQRFKAHPDQLVLIAGKILKDPSSAACVVRDGLVHLLIKRQHRAmgnecpasgpgssg<br/> GSSGSSGVSREPSSRIIRVSVKTPQDCHFLAENSNVRRFKQISKYLHCNADRLVLIFTGKILRQDILSORGILDCSTVHVVRSHsgPsSG-----</p> <p><b>Proposed:</b> aliSize=93 (resi) RMSD=1.93 (Å)<br/> -GSSGSSGSPAPVQDPHLIKVTKPKKEDFSVTDCTIQQLKEETSQRFKAHPDQLVLIAGKILKDPSSAACVVRDGLVHLLIKRQHR--Amgnecpasgpgssg<br/> gSSGSSG-VSGREPSSRIIRVSVKTPQDCHFLAENSNVRRFKQISKYLHCNADRLVLIFTGKILRQDILSORGILDCSTVHVVRSHsgPsSG-----</p>                                                                                                                                                                                                                                                                                                                                                                                                                                                                                                                                                                                                                                                                                                               |
| 521 | <p>lyghA (164)</p> <hr/> <p>li1dD (161)</p> | C | 11.18 | <p><b>TM-align:</b> aliSize=125 (resi) RMSD=3.45 (Å)<br/> -----KTEFRVvndntkenMMVTGLKNIFOKOLPKmpKEYIA--RLV--Y--DR-----SHLSMAVIR-PLTVGGITYPFD-----KREFAEIVFCALISSTEVRGYAHMNHKDYVRNtSNIKYFLTYADNYAIGYFKQGFTEitldksiwgylmqs<br/> gmslpdGFYIRME-----EGDIEQVTETLKVLTtVGTITPESFckLikyWneatvwndnedkkinqNPIVVDRTETAATGNIIEBKIiHELGLCGHEDIvNSKYGGQLKLIIDQVTIGFD-YGCKIILDCDEKNVKFYEACGFSNAG-----vEMQIR-----</p> <p>mlpriyld-<br/> -----k</p> <p><b>SARST:</b> aliSize=110 (resi) RMSD=6.63 (Å)<br/> kiefrvnnndntkenmmv-----TGLKNIFOKO--LPKMPKEYIARIV-----YDRSHLSMAVIRKPLTVGGITYPFDKREFAEIVFCALISSTEVRGYAHMNHKDYVRNtSNIKYFLTYADNYAIGYFKQGFTEitldksiw<br/> -----gmslpdgyfirmeegdlEQVTETLKVLTtVGTITPESFckLikyWneatvwnDNEKKIINqNPMVVDKRTETAATGNIIEBKIiHELGLCGHEDIvNSKYGGQLKLIIDQVTIGFDY-GCYKIILDCDEKNVKFYEACGFSNAGvemqirk-----</p> <p>mgykdyegtlmqcsmprilyd<br/> -----</p> <p><b>BLAST:</b> aliSize=42 (resi) iden=15.53% (25/161) simi=26.09% (42/161)<br/> kiefrvnn-----DNTKINMMVTGLKNIFOKOLPKmpKEYIARIVYDRSHLSMAVIRKPLTVGGITYPFDKREFAEIVFCALISSTEVRGYAHMNHKDYVRNtSNIKYFLTYADNYAIGYFKQGFTEitldksiw<br/> -----gmslpdgyfirmeegdlEQVTETLKVLTtVGTITPESFckLikyWneatvwnDNEKKIINqNPMVVDKRTETAATGNIIEBKIiHELGLCGHEDIvNSKYGGQLKLIIDQVTIGFDY-GCYKIILDCDEKNVKFYEACGFSNAGvemqirk-----</p> <p>ksiwgyikdyegtlmqcsmprilyd<br/> -----</p> <p><b>Proposed:</b> aliSize=122 (resi) RMSD=2.43 (Å)<br/> -----KTEFRVvndntkenMMVTGLKNIFOKOLPKmpKEYIARIVYDRSHLSMAVIRKPLTVGGITYPFDKREFAEIVFCALISSTEVRGYAHMNHKDYVRNtSNIKYFLTYADNYAIGYFKQGFTEitldksiwgyikdyegtlmqcsmprilyd<br/> gmslpdGFYIRME-----EGDIEQVTETLKVLTtVGTITPESFckLikyWneatvwndnedkkinqNPIVVDRTETAATGNIIEBKIiHELGLCGHEDIvNSKYGGQLKLIIDQVTIGFDY-GCYKIILDCDEKNVKFYEACGFSNAGvemqirk-----</p> <p>MOCSMLpriyld<br/> EMQIRK-----</p>                                                                                                        |

|     |                                             |   |       |                                                                                                                                                                                                                                                                                                                                                                                                                                                                                                                                                                                                                                                                                                                                                                                                                                                                                                                                                                                                                                                                                                                       |
|-----|---------------------------------------------|---|-------|-----------------------------------------------------------------------------------------------------------------------------------------------------------------------------------------------------------------------------------------------------------------------------------------------------------------------------------------------------------------------------------------------------------------------------------------------------------------------------------------------------------------------------------------------------------------------------------------------------------------------------------------------------------------------------------------------------------------------------------------------------------------------------------------------------------------------------------------------------------------------------------------------------------------------------------------------------------------------------------------------------------------------------------------------------------------------------------------------------------------------|
| 522 | <p>lyghA (164)</p> <hr/> <p>ls3zB (145)</p> | C | 8.28  | <p><b>TM-align:</b> aliSize=123 (resi) RMSD=2.69 (Å)<br/> kIEFRVvndntkeMMVITGLKNIFOKOLPKMPKYYIA-RLVYD--RS--HLMAVIRKPIITVVIGITYRPFDK-----REFAEIVFCAISSTEORVRYGAHLMNHLKDYVRnTSNIKYFLTYAD-NY--AIGYFKKQGHFKKEitldksiwmgyik--DYeggtlmqcsmlpriyld----</p> <p><b>SARST:</b> aliSize=107 (resi) RMSD=3.37 (Å)<br/> kiefrvvndntkenmmv-----TGLKNIFOKOLPKMPK---YIARLVYDRSHLSMAVIRKpLTVVIGITYRPFdkR---E----FAEIVFCAISSTEORVRYGAHLMNHLKDYVRnTSNIKYFLTYADNYA---IGYFKKQGHFK---keitldksiwmgyikdyeggtlm-----</p> <p><b>BLAST:</b> aliSize=14 (resi) iden=6.21% (9/145) simi=9.66% (14/145)<br/> kiefrvvndntkenmmvltglknifqkqlpkmpkeyiarlvdrshlsmavirkpltvvggityrpfdkrefaeivfcaisssteqrvgyahlm-----fkkqgftkYVRNTSNIKYFLTYADNYAIGY-----</p> <p><b>Proposed:</b> aliSize=130 (resi) RMSD=2.33 (Å)<br/> kIEFRVvndntkeMMVITGLKNIFOKOLPKMPKYYIA-RLVYD--RS--HLMAVIRKPIITVVIGITYRPFDK-----REFAEIVFCAISSTEORVRYGAHLMNHLKDYVRnTSNIKYFLTYAD-NY--AIGYFKKQGHFKKEitldksiwmgyikdyeggtlmqcsmlPri-ryld-----</p>                                                                                                                                         |
| 523 | <p>lyghA (164)</p> <hr/> <p>ls5kA (153)</p> | C | 7.19  | <p><b>TM-align:</b> aliSize=123 (resi) RMSD=2.77 (Å)<br/> glvprgshMDITQ-----KTHIEHWRLRKLQW---GHPdDAH1ADGEEilQadhLASFIAMADG-VAIGFADASIRHdyvngcdsSPVVFLEGI FVLP SFRORGVAKQIIAAVQRWGT-NKGCREMASDTSpenTiSQKVHQALGFEET-----rvIFy-----</p> <p><b>SARST:</b> aliSize=117 (resi) RMSD=3.93 (Å)<br/> k-----IEFRVvndntkenMMVITGLKNIFOKOLPKMPK---KEYIARLVYDRSHLSMAVIRKpLTVVIGITYR---PFdkRE----FAEIVFCAISSTEORVRYGAHLMNHLKDYVRnTSNIKYFLTYADNYAIG---YFKKQGHFK---keitldksiwmgyikdyeggtlmqcsmlpriyld-----</p> <p><b>BLAST:</b> aliSize=14 (resi) iden=5.88% (9/153) simi=9.15% (14/153)<br/> kiefrvvndntkenmmvltglknifqkqlpkmpkeyiarlvdrshlsmavirkpltvvggityrpfdkrefaeivfcaisssteqrvgyahlm-----fkkqgftkYVRNTSNIKYFLTYADNYAIGY-----</p> <p><b>Proposed:</b> aliSize=129 (resi) RMSD=2.32 (Å)<br/> glvprgshMDITQ-----KTHIEHWRLRKLQW---GHPdDAHLADGEEilQadhLASFIAMADG-VAIGFADASIR-HdyvngcdsSPVVFLEGI FVLP SFRORGVAKQIIAAVQRWGT-NKGCREMASDTSpenTiSQKVHQALGFEET-----ERVIFYRKR-Cc-----</p>                                                                                                                                                  |
| 524 | <p>lyghA (164)</p> <hr/> <p>lufhA (155)</p> | C | 10.97 | <p><b>TM-align:</b> aliSize=125 (resi) RMSD=2.85 (Å)<br/> kIEFRVvndntkeMMVITGLKNIFOKOLPK-M-----P--KE-YIARLV--YD-RS--LSMAVI-RKPIITVVIGITYRPFDKR--EFAEIVFCAISSTEORVRYGAHLMNHLKDYVRnTSNIKYFLTYADN-Y--AIGYFKKQGHFKKEitldksiwmgyikdyeggtlmqcsmlpriyld-----</p> <p><b>SARST:</b> aliSize=128 (resi) RMSD=9.95 (Å)<br/> kiefrvvndnt-----KENMMVITGLKNIFOKOLPKMPKYYIARLV-----YDRSHLSMAVIRK---PLTVVIGITYRPFd--KREFAEIVFCAISSTEORVRYGAHLMNHLKDYVRnTSNIKYFLTYADNYAIGYFKKQGHFKKEitldksiwmgyikdyeggtlmqcsmlpriyld-----</p> <p><b>BLAST:</b> aliSize=25 (resi) iden=9.03% (14/155) simi=16.13% (25/155)<br/> kiefrvvndntkenmmvltglknifqkqlpkmpkeyiarlvdrshlsmavirkpltvvggityrpfdkrefaeivfcaiss-----tIMLTPM-----QTEEFRSYLYTTIKHYAEKvkgatwlpedaqlLSKqVfTdlprGLETPHHHLWSLkInEKDlVGLWlWlHAEPEHPqQEAfYDFGLYEPYRKGAKQALAAQAAARS-MGIRKLSLHVFAhNqtARKLYEQTGFEET-----vVM-----</p> <p><b>Proposed:</b> aliSize=128 (resi) RMSD=2.41 (Å)<br/> kIEFRVvndntkeMMVITGLKNIFOKOLPK-M-----P--KE-YIARLV--Y--Y--DRSLSMAVI-RKPIITVVIGITYRPFDKR--EFAEIVFCAISSTEORVRYGAHLMNHLKDYVRnTSNIKYFLTYADN-Y--AIGYFKKQGHFKKEitldksiwmgyikdyeggtlmqcsmlPriyld-----</p> |

|     |                                             |   |       |                                                                                                                                                                                                                                                                                                                                                                                                                                                                                                                                                                                                                                                                                                                                                                                                                                                                                                                                                                                                                                                                                                                                                                                                                                                                                                                                                                                                                                                                                                                                                                                                                                                                                                                                                                                                                                                                                                                   |
|-----|---------------------------------------------|---|-------|-------------------------------------------------------------------------------------------------------------------------------------------------------------------------------------------------------------------------------------------------------------------------------------------------------------------------------------------------------------------------------------------------------------------------------------------------------------------------------------------------------------------------------------------------------------------------------------------------------------------------------------------------------------------------------------------------------------------------------------------------------------------------------------------------------------------------------------------------------------------------------------------------------------------------------------------------------------------------------------------------------------------------------------------------------------------------------------------------------------------------------------------------------------------------------------------------------------------------------------------------------------------------------------------------------------------------------------------------------------------------------------------------------------------------------------------------------------------------------------------------------------------------------------------------------------------------------------------------------------------------------------------------------------------------------------------------------------------------------------------------------------------------------------------------------------------------------------------------------------------------------------------------------------------|
| 525 | <p>lyghA (164)</p> <hr/> <p>lufhB (154)</p> | C | 11.04 | <p><b>TM-align:</b> aliSize=125 (resi) RMSD=2.66 (Å)<br/> kIEFRVvndntkenMMVLTGLKNIFOKLPK-M-----PKKEYIARIV--YD-RS-LSMAVIR-KPITVVGITIRPFDKR--EFAEIVFCATSSSTEQVRGYGAHLMNHKDYVRNtSNIKYFLTYADN-Y--IGYFKKQFTKEITldksiwmgikdyEGGtImqcsmlpriyld---<br/> -MLTPM-----QTEEFRSYLTYTTHYAEeKvkagtwlpedaqllSKQVFTdLprGlEtpHHLWLSLKLnEK-DIVGWLWIHAEPHPqQEAFFYDFGLYEPYRGGYAKQALAA-DQAARS-MGRKLSLHVFAhNqtRKLQEQTGQETD-----V-VM-----skkl</p> <p><b>SARST:</b> aliSize=116 (resi) RMSD=5.59 (Å)<br/> kiefrvvndnt-----KENMMVLTGLKNIFOKLPKMPKEYIARIV-----YDRSHLSMAVIRK---PLTVVGITIRPFDP--KREFAEIVFCATSSSTEQVRGYGAHLMNHKDYVRNtSNIKYFLTYADNYAIGY---FKKQFT-----keITldksiwmgikdyEGGtIm<br/> -----imltpmqteefRSYLTYTTHYAEeKvkagtwlpedaqllSkqvftdlprGLEtPHHHLWLSLKLnEKDlVGLWLIHAEPHPqQEAFFYDFGLYEPYRGGYAKQALAA-DQAARS-MGRKLSLHVFAhNQTarklYEQTGQETdvmskkl-----</p> <p>qcsmlpriyld<br/> -----</p> <p><b>BLAST:</b> aliSize=25 (resi) iden=9.09% (14/154) simi=16.23% (25/154)<br/> kiefrvvndntkenmmvltglknifqkqlpkmpkeyiarlvdrshlsmavirkpltvvggityrpfdkrefaeivfaiss-----imltpmqteefrsyltytthyaeeKvkagtwlpedaqllskqvftdlprgletphhhlwslklnekdivglwihaepehpqqaefiydfglyEYVRC--GAH<br/> -----PYRCKGAKO</p> <p>LMNHKDYVRNtSNIKYFLTYADNYAIGYFKKQFTKEITldksiwmgikdyEGGtImqcsmlpriyld<br/> ALAA-DQAARSMGIRLSLHVFAhNQTARKLYEQTGQETDVMSSKLL-----</p> <p><b>Proposed:</b> aliSize=129 (resi) RMSD=2.25 (Å)<br/> kIEFRVvndntkenMMVLTGLKNIFOKLPK-M-----PKKEYIARIV--Y--DRS-LSMAVIR-KPITVVGITIRPFDKR--EFAEIVFCATSSSTEQVRGYGAHLMNHKDYVRNtSNIKYFLTYADN-Y--IGYFKKQFTKEITldksiwmgikdyEGGtLMQCSMLPRIYLD<br/> -MLTPM-----QTEEFRSYLTYTTHYAEeKvkagtwlpedaqllSKQVFTdLprGlEtpHHLWLSLKLnEK-DIVGWLWIHAEPHPqQEAFFYDFGLYEPYRGGYAKQALAA-DQAARSMGIRKLSLHVFAhNqtRKLQEQTGQETD-----TDV-VSSKLL-----</p>                                                                                                                                                                            |
| 526 | <p>lyghA (164)</p> <hr/> <p>2d4pA (130)</p> | C | 7.69  | <p><b>TM-align:</b> aliSize=117 (resi) RMSD=3.34 (Å)<br/> kIEFRVvndntkenMMVLTGLKNIFOKLPKMPKEYIARLVYDRS--H-LSMAVIRKpLTVVGITIRPFDP--KREFAEIVFCAISsteQVRGYGAHLMNHKDYVRNtSNIKYFLTYADNYA--IGY-FKKO-GFTKEITldksiw-MgyiKDYEGGtImqcsmlpriyld---<br/> -MRFRPF-----TEEDLDRINRLA-G--K--RP-VSLGALRFFarTgHSFLAEEG-EEPMGFALAQAVWqgeATTVLVTRIEGR---S-VEALRGLRAVVKSAID-AGVYEVALHLPERKELEealkaegFALGPV-----IA---VRVL-----gsr</p> <p><b>SARST:</b> aliSize=100 (resi) RMSD=4.69 (Å)<br/> kiefrvvndntkenmmvltgl-----KNIFOKLPKMPKEYIARLVYDRSHLSMAVIRKpLTVVGITIRPFDKR--EFAEIVFCAISsteQVRGYGAHLMNHKDYVRNtSNIKYFLTYADNYAIGYFK---KQFTK-----eitldksiwmgikdyEGGtImqcsmlpri<br/> -----mrfprfteedLDRINRLAGRRvsLGALRFFARTGHSLAEE---GEEPMGFALAQAVWQGEATTVLVTRIEGR---SVEALRGLRAVVKSAIDAGVYEVALHLPERKELEealkaegFALGPVlavrvlgsr-----</p> <p>ryld<br/> -----</p> <p><b>BLAST:</b> aliSize=8 (resi) iden=3.08% (4/130) simi=6.15% (8/130)<br/> kiefrvvndntkenmmvltglknifqkqlpkmpkey---mrfprfteedldrlnrlagkrpvslgalrffartghsflaegeepmgfalqavwqgeattvlvtriegrsvéalrgllravvksaiaGVYEVALHLDperkelealkaegfalgpVlavrvlgsr-----<br/> -----aissteqvrGYGAHLMNHKDYVRNtSNIKYFLTYADNYAIGYFKKQFTKEITldksiwmgikdyEGGtImqcsmlpriyld</p> <p><b>Proposed:</b> aliSize=119 (resi) RMSD=2.58 (Å)<br/> kIEFRVvndntkenMMVLTGLKNIFOKLPKMPKEYIARLVYDR-SH-LSMAVIRKpLTVVGITIRPFDKR---EFAEIVFCAISsteQVRGYGAHLMNHKDYVRNtSNIKYFLTYADNYAIG-YF--KQ-O-GFTKEITldksiwmgikdyEGGtLMQCSMLPRIYLD<br/> -MRFRPF-----TEEDLDRINRLA-G--K-R-P--VSLGALRFFARTGHSLAEEG-EEPMGFALAQAV-WQgeATTVLVTRIEGR---S-VEALRGLRAVVKSAID-AGVYEVALHLPER-KeLEealkaegFALGPV-----VLAVRVIGSR-----</p>                                                                                                                                                                                                                                                                                                                  |
| 527 | <p>lyghA (164)</p> <hr/> <p>2f5iA (167)</p> | C | 9.15  | <p><b>TM-align:</b> aliSize=132 (resi) RMSD=3.21 (Å)<br/> kIEFRVvndntkenMMVLTGLKNIFOKLPKMPKEYIARLVYDRS--SHLSMAVIRKpLTVVGITIRPFDP--EFAEIVFCATSSSTEQVRGYGAHLMNHKDYVRNtSNIKYFLTYADNYA--IGYFKKQFTKEITldksiw-MgyiKDYEGGtImqcsmlpriyld---<br/> -KFVIRPAT---A-ADCSIDLRLIKELAYEYMEEQVI-LT-ekDLLeGfgehpFYHCLVAEVPKehwtpegHSIVGFAMYFTYDpwIGKLLYLEDFFVMSDYRGFIISEILKNLSQVAMR-CRCSMHFLVAeWNepSINFYRRRASDLS--seEG---W--RLFK-----id</p> <p>keyllkmat<br/> -----</p> <p><b>SARST:</b> aliSize=138 (resi) RMSD=7.00 (Å)<br/> kIEFRVvndntkenMMVLTGLKNIFOKLPKMPKEYIARLVYDRS--SHLSMAVIRKpLTVVGITIRPFDP--FDKRE-EFAEIVFCATSSSTEQVRGYGAHLMNHKDYVRNtSNIKYFLTYADNYAIGYF---KQFTKEITldksiwmgikdyEGGtLMQCSMLPRIYLD<br/> ---kFVIRPATAADCSIDLRLIKELAKYEMEEQVILTEKDLLEDGFGFhpFYHCLVAEVPKehwtpegHSIVGFAMYFTYDpwIGKLLYLEDFFVMSDYRGFIISEILKNLSQVAMR-CRCSMHFLVAEWNepSINFYRRRASDLS-----EEGWRFKIdkeyllkmat-----</p> <p><b>BLAST:</b> aliSize=42 (resi) iden=12.20% (20/164) simi=25.61% (42/164)<br/> kiefrvvndntkenmmvltglknifqkqlpkmpkeyiarlvdrshlsmavirkpltvvggikfvirpataadcsdilrlikelakyeemeeqviltedkllledgfgfhpfyhclvaevpkehwtpeghsigvfyf---YRPH-DREFAEIVFCATSSSTEQVRGYGAHLMNHKDYVRNtSNIKYFLTYADNYAIGYF---KQFTKEITldksiwmgikdyEGGtLMQCSMLPRIYLD<br/> -----kfyf---YRPH-DREFAEIVFCATSSSTEQVRGYGAHLMNHKDYVRNtSNIKYFLTYADNYAIGYF---KQFTKEITldksiwmgikdyEGGtLMQCSMLPRIYLD</p> <p>ITYADNYAIGYFKKQFTKEITldksiwmgikdyEGGtImqcsmlpriyld<br/> VAEWepSINFYRRR-ASDLSSEEG-WRLFKIDKeyllkmat-----</p> <p><b>Proposed:</b> aliSize=136 (resi) RMSD=2.36 (Å)<br/> kIEFRVvndntkenMMVLTGLKNIFOKLPKMPKEYIARLVYDRS--SHLSMAVIRKpLTVVGITIRPFDP--FDKRE-EFAEIVFCATSSSTEQVRGYGAHLMNHKDYVRNtSNIKYFLTYADNYAIGYF---KQFTKEITldksiwmgikdyEGGtLMQCSMLPRIYLD<br/> -KFVIRPAT---A-ADCSIDLRLIKELAYEYMEEQV--ILtekd--LLeGfgehpFYHCLVAEVPKehwtpegHSIVGFAMYFTYDpwIGKLLYLEDFFVMSDYRGFIISEILKNLSQVAMR-CRCSMHFLVAeWNepSINFYRRRASDLS-----EEGWRFKIDKeyllkmat-----</p> <p>R-YLd<br/> KmAT-</p> |



|     |                                       |   |                                                                                                                                                                                                                                                                                                                                                                                                                                                                                                                                                                                                                                                                                                                                                                                                                                                                                                                                                                                                                                                                                                                                                                                                                                                                                                                                                                                                                                                                                                                                                                                                                                                                                                                                                                                                                                                                                                                                              |
|-----|---------------------------------------|---|----------------------------------------------------------------------------------------------------------------------------------------------------------------------------------------------------------------------------------------------------------------------------------------------------------------------------------------------------------------------------------------------------------------------------------------------------------------------------------------------------------------------------------------------------------------------------------------------------------------------------------------------------------------------------------------------------------------------------------------------------------------------------------------------------------------------------------------------------------------------------------------------------------------------------------------------------------------------------------------------------------------------------------------------------------------------------------------------------------------------------------------------------------------------------------------------------------------------------------------------------------------------------------------------------------------------------------------------------------------------------------------------------------------------------------------------------------------------------------------------------------------------------------------------------------------------------------------------------------------------------------------------------------------------------------------------------------------------------------------------------------------------------------------------------------------------------------------------------------------------------------------------------------------------------------------------|
| 528 | <p>1yghA (164)</p> <p>2g3tA (169)</p> | C | <p>10.37</p> <p>TM-align: aliSize=132 (resi) RMSD=3.22 (Å)<br/> KIEFRVNNdnTKENMMVLTGKNI FOKLPKMPKEYiARl--VY--DR----SHLSMAVIRKP-----LTVVGGITRPFDK---REFAEIVFCAISSTEQVRGYAHLMNHKDYVRNtSNIKYFLTYAD-NY--AIGYFKKOFKKEITL--DKSiwMgyIKDYeggtlmqcsmlpriryld--<br/> KFVIRPAT---A-ADCSIDLRLIKELAYEYMEEQVI-LT-ekDLLeGfgehpfYHCLVAEVPKehwtpegHSIVGFAMFYFTYDpwIGKLLYLEDFVMSDYRGFITSEILKNLSQVAMR-CRCSSMHFLVAeWNepSINFYRRRASDLS--seEG--W--RLFK-----id</p> <p>keyllkmatee</p> <p>SARST: aliSize=128 (resi) RMSD=7.32 (Å)<br/> kiefrvvnndntke-----NMMVLTGKNI FOKLPKMPKEYiARlVYDR--SHLSMAVIRKPLT-----VVGGITRPF--FDKREFAEIVFCAISSTEQVRGYAHLMNHKDYVRNtSNIKYFLTYADNYAIGYFK---KOFKKEITLDKSiwmevikdYEGGTLMOCSS-----<br/> -----kfvirpataadCSIDLRLIKELAYEYMEEQVI L TEKDLLEDGfGehpfYHCLVAEVPKehwtpegHSIVGFAMFYFTYDpwIGKLLYLEDFVMSDYRGFITSEILKNLSQVAMR-CRCSSMHFLVAEWNepSINFYRRRAS-----DLSS-----EEGWRFLKIDkeyll</p> <p>-----mlpriryld<br/> kmatee-----</p> <p>BLAST: aliSize=42 (resi) iden=12.20% (20/164) simi=25.61% (42/164)<br/> kiefrvvnndntkenmmvltglnkfqqkpkmpkeyiarlvdrshlsmavirkpltvvggi-----TYRPF-DKREFAEIVFCAISSTEQVRGYAHLMNHKDYVRNtSNIKYFLTYADNYAIGYFKKOFKKEITL--DKSiwMgyIKDYeggtlmqcsmlpriryld<br/> -----kfvirpataadcsdilrlikelakyeymeeqviltkdllledgfhclvaevpkehwtpegHSIVGFAMFYFTYDpwIGKLLYLEDFVMSDYRGFITSEILKNLSQVAMR-CRCSSMHFLVAEWNepSINFYRRRASDLS--seEG--W--RLFK-----id</p> <p>ITYADNY-AIGYFKKOFKKEITLDKSiwMgyIKDYeggtlmqcsmlpriryld<br/> VAEWepSINFYRRRASDLSSSEEG-WRLFKIDKeyllkmatee-----</p> <p>Proposed: aliSize=137 (resi) RMSD=2.48 (Å)<br/> KIEFRVNNdnTKENMMVLTGKNI FOKLPKMPKEYiARl--VY--DR----SHLSMAVIRKP-----LTVVGGITRPFDK---REFAEIVFCAISSTEQVRGYAHLMNHKDYVRNtSNIKYFLTYAD-NY--AIGYFKKOFKKEITL--DKSiwMgyIKDYeggtlmqcsmlpriryld<br/> KFVIRPAT---A-ADCSIDLRLIKELAYEYMEEQVI--LTekd--LLeGfgehpfYHCLVAEVPKehwtpegHSIVGFAMFYFTYDpwIGKLLYLEDFVMSDYRGFITSEILKNLSQVAMR-CRCSSMHFLVAeWNepSINFYRRRASD-----LsEEGW-RLFKIDKeyllkm</p> <p>RIRYld<br/> ATEE--</p> |
| 529 | <p>1yghA (164)</p> <p>2g3tB (168)</p> | C | <p>9.15</p> <p>TM-align: aliSize=132 (resi) RMSD=3.22 (Å)<br/> KIEFRVNNdnTKENMMVLTGKNI FOKLPKMPKEYiARl--VY--DR----SHLSMAVIRKP-----LTVVGGITRPFDK---REFAEIVFCAISSTEQVRGYAHLMNHKDYVRNtSNIKYFLTYAD-NY--AIGYFKKOFKKEITL--DKSiwMgyIKDYeggtlmqcsmlpriryld--<br/> KFVIRPAT---A-ADCSIDLRLIKELAYEYMEEQVI-LT-ekDLLeGfgehpfYHCLVAEVPKehwtpegHSIVGFAMFYFTYDpwIGKLLYLEDFVMSDYRGFITSEILKNLSQVAMR-CRCSSMHFLVAeWNepSINFYRRRASDLS--seEG--W--RLFK-----id</p> <p>keyllkmatee</p> <p>SARST: aliSize=136 (resi) RMSD=6.64 (Å)<br/> kiefrvvnndntkenmmvltglnkfqqkpkmpkeyiarlvdrshlsmavirkpltvvggi-----TYRPF-DKREFAEIVFCAISSTEQVRGYAHLMNHKDYVRNtSNIKYFLTYADNYAIGYFKKOFKKEITL--DKSiwMgyIKDYeggtlmqcsmlpriryld<br/> -----kfvirpataadCSIDLRLIKELAYEYMEEQVI L TEKDLLEDGfGehpfYHCLVAEVPKehwtpegHSIVGFAMFYFTYDpwIGKLLYLEDFVMSDYRGFITSEILKNLSQVAMR-CRCSSMHFLVAEWNepSINFYRRRAS-----DLSS-----EEGWRFLKIDkeyllkmatee-----</p> <p>riryld<br/> -----</p> <p>BLAST: aliSize=42 (resi) iden=12.20% (20/164) simi=25.61% (42/164)<br/> kiefrvvnndntkenmmvltglnkfqqkpkmpkeyiarlvdrshlsmavirkpltvvggi-----TYRPF-DKREFAEIVFCAISSTEQVRGYAHLMNHKDYVRNtSNIKYFLTYADNYAIGYFKKOFKKEITL--DKSiwMgyIKDYeggtlmqcsmlpriryld<br/> -----kfvirpataadcsdilrlikelakyeymeeqviltkdllledgfhclvaevpkehwtpegHSIVGFAMFYFTYDpwIGKLLYLEDFVMSDYRGFITSEILKNLSQVAMR-CRCSSMHFLVAEWNepSINFYRRRASDLS--seEG--W--RLFK-----id</p> <p>ITYADNY-AIGYFKKOFKKEITLDKSiwMgyIKDYeggtlmqcsmlpriryld<br/> VAEWepSINFYRRRASDLSSSEEG-WRLFKIDKeyllkmatee-----</p> <p>Proposed: aliSize=136 (resi) RMSD=2.35 (Å)<br/> KIEFRVNNdnTKENMMVLTGKNI FOKLPKMPKEYiARl--VY--DR----SHLSMAVIRKP-----LTVVGGITRPFDK---REFAEIVFCAISSTEQVRGYAHLMNHKDYVRNtSNIKYFLTYAD-NY--AIGYFKKOFKKEITL--DKSiwMgyIKDYeggtlmqcsmlpriryld<br/> KFVIRPAT---A-ADCSIDLRLIKELAYEYMEEQVI--LTekd--LLeGfgehpfYHCLVAEVPKehwtpegHSIVGFAMFYFTYDpwIGKLLYLEDFVMSDYRGFITSEILKNLSQVAMR-CRCSSMHFLVAeWNepSINFYRRRASD-----LsEEGW-RLFKIDKeyll</p> <p>R-YL-d<br/> kmATE-</p>               |
| 530 | <p>1yghA (164)</p> <p>2o28B (180)</p> | C | <p>10.37</p> <p>TM-align: aliSize=126 (resi) RMSD=3.39 (Å)<br/> pdetpmfdpsllkevdsqntatfspaispthpgeGLVLRPL-----CTAD-LnrFFKVLGQLTE--TGVSspeQF-mkSfEhmKksgdYVTVVEDVTIGQIVATA-LIIEHkFIHScAKRGRVEDVVVSDCRGQLKLLSTLTLLSKK-LCYKITLECLPQNVGFYKGFYVSE-----<br/> wmgylkDYeggtlmqcsmlpriryld-<br/> -----nYMCRR-----f</p> <p>SARST: aliSize=109 (resi) RMSD=9.32 (Å)<br/> kiefrvvnndntkenmmvltglnkfqqkpkmpkeyiarlvdrshlsmavirkpltvvggi-----NNDNTKENMMVLTGKNI FOKLPKMPKEYiARlVYDR--SHLSMAVIRKPLT-----VVGGITRPF--FDKREFAEIVFCAISSTEQVRGYAHLMNHKDYVRNtSNIKYFLTYADNYAIGYFKKOFKKEITL--DKSiwMgyIKDYeggtlmqcsmlpriryld<br/> -----pdetpmfdpsllkevdsqntatfspaispthpgeGLVLRPLCTAD-LnrFFKVLGQLTE--TGVSspeQF-mkSfEhmKksgdYVTVVEDVTIGQIVATA-LIIEHkFIHScAKRGRVEDVVVSDCRGQLKLLSTLTLLSKK-LCYKITLECLPQNVGFYKGFYVSE-----</p> <p>QFKEITLdkSiwmgikdyeggtlmqcsmlpriryld<br/> FYV-----VSEENymcrrf-----</p> <p>BLAST: aliSize=20 (resi) iden=7.32% (12/164) simi=12.20% (20/164)<br/> kiefrvvnndntkenmmvltglnkfqqkpkmpkeyiarlvdr-----SHLSMAVIRKPLTVVGGITRPFDK---REFAEIVFCAISSTEQVRGYAHLMNHKDYVRNtSNIKYFLTYADNYAIGYFKKOFKKEITL--DKSiwMgyIKDYeggtlmqcsmlpriryld<br/> -----pdetpmfdpsllkevdsqntatfspaispthpgeGLVLRPLCTAD-LnrFFKVLGQLTE--TGVSspeQF-mkSfEhmKksgdYVTVVEDVTIGQIVATA-LIIEHkFIHScAKRGRVEDVVVSDCRGQLKLLSTLTLLSKK-LCYKITLECLPQNVGFYKGFYVSE-----</p> <p>-----rntsnikyfltyadnyaigyfkqgftkEITLdkSiwmgikdyeggtlmqcsmlpriryld<br/> skklncykitleclpqnvgfykkgfytvseenymcrrf-----</p> <p>Proposed: aliSize=123 (resi) RMSD=2.43 (Å)<br/> pdetpmfdpsllkevdsqntatfspaispthpgeGLVLRPL-----CTAD-LnrFFKVLGQLTE--ETGv--Vspeq--FmkSfEhmKksgdYVTVVEDVTIGQIVATA-LIIEHkFIHScAKRGRVEDVVVSDCRGQLKLLSTLTLLSKK-LCYKITLECLPQNVGFYKGFYVSE-----<br/> dkSiwmgikdyeggtlmqcsmlpriryld<br/> -----EENYMCRRf-----</p>                                                                                                                                                                                     |

|     |                                                     |   |       |                                                                                                                                                                                                                                                                                                                                                                                                                                                                                                                                                                                                                                                                                                                                                                                                                                                                                                                                                                                                                                                                                                                                                                                                                                                                   |
|-----|-----------------------------------------------------|---|-------|-------------------------------------------------------------------------------------------------------------------------------------------------------------------------------------------------------------------------------------------------------------------------------------------------------------------------------------------------------------------------------------------------------------------------------------------------------------------------------------------------------------------------------------------------------------------------------------------------------------------------------------------------------------------------------------------------------------------------------------------------------------------------------------------------------------------------------------------------------------------------------------------------------------------------------------------------------------------------------------------------------------------------------------------------------------------------------------------------------------------------------------------------------------------------------------------------------------------------------------------------------------------|
| 531 | <p>1yghA<br/>(164)</p> <hr/> <p>2vbqB<br/>(144)</p> | C | 8.33  | <p><b>TM-align:</b> aliSize=122 (resi) RMSD=2.72 (Å)<br/> kiefrvvnndntkeMMVITGLKNI FOKQLKMPKEYIARLVYDR--S--HL S MAVIRKpLTVVIGITYRPFDK-----REFAEIVFCATISSTEQVRGYGAH MNHLKDYVRnTSNIKYFLTYAD-NY--AIGYFKKQGFTEitldksiwmgyik---DYeggtlmqcsmlpriyld----</p> <p><b>SARST:</b> aliSize=109 (resi) RMSD=4.19 (Å)<br/> kiefrvvnndntkenmmv-----ITGLKNI FOKQLKMPKEYIARLVYDR--S--HL S MAVIRKpLTVVIGITYRPFDK-----REFAEIVFCATISSTEQVRGYGAH MNHLKDYVRnTSNIKYFLTYADNYAIGYFKKQGFTEitldksiwmgyikdyeggtlmqcsmlpriyld-----</p> <p><b>BLAST:</b> aliSize=14 (resi) iden=6.25% (9/144) simi=9.72% (14/144)<br/> kiefrvvnndntkenmmvltglknifqkqlpkmpkeyiarlvdrshlsmavirkpltvvggityrpfdkrefaeivfcaissseqvrgyahlm-----di r qm k t h l e h w r g l r k q l w p g h p d d a h l a d g e e i l q a d h l a s f a m a d - g v a i c f a d a s i r h d y n g c d s s p v v f l e g i f v l p s f r o r g v a k o l i a a v q r w g t - n k g c r e m a s d t s p e n t i s o k v h q a l g f e e t e ----- r v i f y ----- r k r c -----</p> <p><b>Proposed:</b> aliSize=129 (resi) RMSD=2.37 (Å)<br/> kiefrvvnndntkeMMVITGLKNI FOKQLKMPKEYIARLVYDR--RS--HL S MAVIRKpLTVVIGITYRPFDK-----REFAEIVFCATISSTEQVRGYGAH MNHLKDYVRnTSNIKYFLTYAD-NY--AIGYFKKQGFTEitldksiwmgyikdyeggtlmqcsmlpriyld-----</p> |
| 532 | <p>1yghA<br/>(164)</p> <hr/> <p>2vxkA<br/>(165)</p> | C | 10.37 | <p><b>TM-align:</b> aliSize=124 (resi) RMSD=3.22 (Å)<br/> entplfspslispdvlavlpadytirplcrsdykrlydvlrvltvgdineeqwnsryewirarsdeyylldvcdgegrivgtgslvverkfihslgmvgheidiavekgoqgkklrlriqaldyvaekv-gcyktildcseaneifyicgckrag-----temahy-----</p> <p><b>SARST:</b> aliSize=108 (resi) RMSD=9.62 (Å)<br/> entplfspslispdvlavlpadytirplcrsdykrlydvlrvltvgdineeqwnsryewirarsdeyylldvcdgegrivgtgslvverkfihslgmvgheidiavekgoqgkklrlriqaldyvaekv-gcyktildcseaneifyicgckrag-----</p> <p><b>BLAST:</b> aliSize=25 (resi) iden=8.54% (14/164) simi=15.24% (25/164)<br/> entplfspslispdvlavlpadytirplcrsdykrlydvlrvltvgdineeqwnsryewirarsdeyylldvcdgegrivgtgslvverkfihslgmvgheidiavekgoqgkklrlriqaldyvaekv-gcyktildcseaneifyicgckrag-----</p> <p><b>Proposed:</b> aliSize=121 (resi) RMSD=2.28 (Å)<br/> entplfspslispdvlavlpadytirplcrsdykrlydvlrvltvgdineeqwnsryewirarsdeyylldvcdgegrivgtgslvverkfihslgmvgheidiavekgoqgkklrlriqaldyvaekv-gcyktildcseaneifyicgckrag-----</p>                                                                                                                                                                                                                                                                                                        |
| 533 | <p>1yk3A<br/>(198)</p> <hr/> <p>1s3zB<br/>(145)</p> | C | 12.41 | <p><b>TM-align:</b> aliSize=141 (resi) RMSD=2.91 (Å)<br/> addalvrlarerfdlpdqvrllarppvpslepPYGLRVAQLTDA MLAEWMNRphAAawEYdWPASRWROHLNAOEgTYSLPLIGSWHCTDGYLELYWAAKdliSHYYDADPYDLG--HAAIaDL SKVnRGFGPLLPRIASVFANEPRIIMFPDHRNTATRRLCEWACKFLGHEdITNrm</p> <p><b>SARST:</b> aliSize=139 (resi) RMSD=7.35 (Å)<br/> addalvrlarerfdlpdqvrllarppvpslepPYGLRVAQLTDA MLAEWMNRphAAawEYdWPASRWROHLNAOEgTYSLPLIGSWHCTDGYLELYWAAKdliSHYYDADPYDLG--HAAIaDL SKVnRGFGPLLPRIASVFANEPRIIMFPDHRNTATRRLCEWACKFLGHEdITNrm</p> <p><b>BLAST:</b> aliSize=48 (resi) iden=18.62% (27/145) simi=33.10% (48/145)<br/> addalvrlarerfdlpdqvrllarppvpslepPYGLRVAQLTDA MLAEWMNRphAAawEYdWPASRWROHLNAOEgTYSLPLIGSWHCTDGYLELYWAAKdliSHYYDADPYDLG--HAAIaDL SKVnRGFGPLLPRIASVFANEPRIIMFPDHRNTATRRLCEWACKFLGHEdITNrm</p> <p><b>Proposed:</b> aliSize=142 (resi) RMSD=2.61 (Å)<br/> addalvrlarerfdlpdqvrllarppvpslepPYGLRVAQLTDA MLAEWMNRphAAawEYdWPASRWROHLNAOEgTYSLPLIGSWHCTDGYLELYWAAKdliSHYYDADPYDLG--HAAIaDL SKVnRGFGPLLPRIASVFANEPRIIMFPDHRNTATRRLCEWACKFLGHEdITNrm</p>                                                                                                                                                                                                                              |

|     |                                             |   |       |                                                                                                                                                                                                                                                                                                                                                                                                                                                                                                                                                                                                                                                                                                                                                                                                                                                                                                                                                                                                                                                                                                                                                                                                                                                                                                                                                                                                                                                                                                                                                                                                                                                                                                                                                                                                                                                                                                                           |
|-----|---------------------------------------------|---|-------|---------------------------------------------------------------------------------------------------------------------------------------------------------------------------------------------------------------------------------------------------------------------------------------------------------------------------------------------------------------------------------------------------------------------------------------------------------------------------------------------------------------------------------------------------------------------------------------------------------------------------------------------------------------------------------------------------------------------------------------------------------------------------------------------------------------------------------------------------------------------------------------------------------------------------------------------------------------------------------------------------------------------------------------------------------------------------------------------------------------------------------------------------------------------------------------------------------------------------------------------------------------------------------------------------------------------------------------------------------------------------------------------------------------------------------------------------------------------------------------------------------------------------------------------------------------------------------------------------------------------------------------------------------------------------------------------------------------------------------------------------------------------------------------------------------------------------------------------------------------------------------------------------------------------------|
| 534 | <p>1yk3A (198)</p> <hr/> <p>1s5kA (153)</p> | C | 13.07 | <p><b>TM-align:</b> aliSize=141 (resi) RMSD=2.70 (Å)<br/> addalvrlarerfdldpqvrrlarppvpsl---EP-P-YGLRVAQLTDAeMLAEWMNRphaaawEYDWASRWROHLNAOEGTYSLPLIGSWHTDGYLELYWAAKdliSHYYDADPYDLG-HAAIaDLKVNrGFgplLPRIVASVFAN-EP-RCRRIMFDPHRNTATRRICEWA-CKFLGE<br/> -----glvprGSHMDIROMNKTTHLE-HWRGLRKO-----WPGHDDAHLADGEEIQADHLASFIAMADVAIFADASIRHD---YVNGCDSSPVVFLGIFV-LPSFR--QR--GVAKQLIAAVQRWgTnkGCREMASITSPENIISQKVHQAALFEETER</p> <p>HDTNrmalyaleapt---<br/> VIFYR-----krc</p> <p><b>SARST:</b> aliSize=141 (resi) RMSD=7.38 (Å)<br/> addalvrlarerfdldpqvrrlarppvpslep---PYGLRVAQLTDAeMLaeWMNRPHAAAWYDWASRWROHLNAOEGTYSLPLIGSWHTDGYLELYWAAKdliSHYYDADPYDLGLHAAIA---DLKVNRFgplLPRIVASVFANEP-RCRRIMFDPHRNTATRRICEWA-CKF1<br/> -----glvprgshMDIROMNKTTHLEHW-----RGQRKQLWPGHDDAHLADGEEIQADHLASFIAMADVAIFADASI-----RHDYVNGCDSSPVVFLGIFVLPFRQV--AKQLIAAVQRWGTNKGCREMASITSPENIISQKVHQAALFEE-</p> <p>gehdtiNRRMALVALE-apt<br/> -----TERVIFYRKRc---</p> <p><b>BLAST:</b> aliSize=48 (resi) iden=17.65% (27/153) simi=31.37% (48/153)<br/> addalvrlarerfdldpqvrrlarppvpsleppyglrvaqltdaemlaew-----NRPPIAAa-----EYDWASRWROHLNAOEGTYSLPLIGSWHTDGYLELYWAAKdliSHYYDADPYDLG-HAAIaDLKVNRFgplLPRIVASVFANEP-RCRRIMFDPHRNTATRRICEWA-CKFLGE<br/> -----glvprgshMDIROMNKTTHLEHW-----RGQRKQLWPGHDDAHLADGEEIQADHLASFIAMADVAIFADASIRHD---YVNGCDSSPVVFLGIFVLPFRQV--AKQLIAAVQRWGTNKGCREMASITSPENIISQKVHQAALFEE-</p> <p>CEWA-----ckflgehdtiNRRMALVALE-apt<br/> HQALfeeterviFYRKRc-----</p> <p><b>Proposed:</b> aliSize=145 (resi) RMSD=2.58 (Å)<br/> addalvrlarerfdldpqvrrlarppvpsl---EP-P-YGLRVAQLTDAeMLAEWMNRphaaawEYDWASRWROHLNAOEGTYSLPLIGSWHTDGYLELYWAAKdliSHYYDADPYDLG-HAAIaDLKVNrGFgplLPRIVASVFAN-EP-RCRRIMFDPHRNTATRRICEWA-CKFLGEH<br/> -----glvprGSHMDIROMNKTTHLE-HWRGLRKO-----WPGHDDAHLADGEEIQADHLASFIAMADVAIFADASIRHD---YVNGCDSSPVVFLGIFV-LPSFR--QR--GVAKQLIAAVQRWgTnkGCREMASITSPENIISQKVHQAALFEETERV</p> <p>DTNRRMALVALE-apt<br/> VIFYRKRc-----</p> |
| 535 | <p>1yk3A (198)</p> <hr/> <p>2vbqB (144)</p> | C | 13.19 | <p><b>TM-align:</b> aliSize=138 (resi) RMSD=2.76 (Å)<br/> addalvrlarerfdldpqvrrlarppvpsleppyGLRVAQLTDAeMLAEWMNRphAAAWYDWASRWROHLNAOEGTYSLPLIGSWHTDGYLELYWAAKdliSHYYDADPYDLG-HAAIaDLKVNrGFgplLPRIVASVFAN-EP-RCRRIMFDPHRNTATRRICEWA-CKFLGEHDTN<br/> -----DIROMNKTTHLE-HWRGLRKO-----WPGHDDAHLADGEEIQADHLASFIAMADVAIFADASIRHD---YVNGCDSSPVVFLGIFV-LPSFR--QR--GVAKQLIAAVQRWgTnkGCREMASITSPENIISQKVHQAALFEETERVIFYR-</p> <p>rmalyaleapt---<br/> -----krc</p> <p><b>SARST:</b> aliSize=138 (resi) RMSD=7.42 (Å)<br/> addalvrlarerfdldpqvrrlarppvpsleppyg-LVAQLTDAeMLaeWMNRPHAAAWYDWASRWROHLNAOEGTYSLPLIGSWHTDGYLELYWAAKdliSHYYDADPYDLGLHAAIA---DLKVNRFgplLPRIVASVFANEP-RCRRIMFDPHRNTATRRICEWA-CKFLGEHdt<br/> -----DIROMNKTTHLEHW-----RGQRKQLWPGHDDAHLADGEEIQADHLASFIAMADVAIFADASI-----RHDYVNGCDSSPVVFLGIFVLPFRQV--AKQLIAAVQRWGTN--KGCREMASITSPENIISQKVHQAALFEE-----</p> <p>NRRMALVALE-apt<br/> TERVIFYRKRc---</p> <p><b>BLAST:</b> aliSize=48 (resi) iden=18.75% (27/144) simi=33.33% (48/144)<br/> addalvrlarerfdldpqvrrlarppvpsleppyglrvaqltdaemlaew-----NRPPIAAa-----EYDWASRWROHLNAOEGTYSLPLIGSWHTDGYLELYWAAKdliSHYYDADPYDLG-HAAIaDLKVNRFgplLPRIVASVFANEP-RCRRIMFDPHRNTATRRICEWA-CKFLGEHDTN<br/> -----diromnktthlehw-----rgqrkqlwpgHDDAHLADGEEIQADHLASFIAMADVAIFADASIRHD---YVNGCDSSPVVFLGIFVLPFRQV--AKQLIAAVQRWGTN--KGCREMASITSPENIISQKVHQAALFEETERVIFYR-</p> <p>-----ckflgehdtiNRRMALVALE-apt<br/> ervifyrkr-----</p> <p><b>Proposed:</b> aliSize=141 (resi) RMSD=2.60 (Å)<br/> addalvrlarerfdldpqvrrlarppvpsleppyGLRVAQLTDAeMLAEWMNRphAAAWYDWASRWROHLNAOEGTYSLPLIGSWHTDGYLELYWAAKdliSHYYDADPYDLG-HAAIaDLKVNrGFgplLPRIVASVFAN-EP-RCRRIMFDPHRNTATRRICEWA-CKFLGEHDTN<br/> -----DIROMNKTTHLE-HWRGLRKO-----WPGHDDAHLADGEEIQADHLASFIAMADVAIFADASIRHD---YVNGCDSSPVVFLGIFV-LPSFR--QR--GVAKQLIAAVQRWgTnkGCREMASITSPENIISQKVHQAALFEETERVIFYR-</p> <p>RMALVALE-apt<br/> KRC-----</p>                                                   |
| 536 | <p>1yr0A (163)</p> <hr/> <p>1s3zB (145)</p> | C | 16.55 | <p><b>TM-align:</b> aliSize=133 (resi) RMSD=2.51 (Å)<br/> sVELRDATVDDISGIEIYNDAVVnttaiwnEVVVLENRKDWFAAARTSRGFPVIVAILDCKVAGYSYGDWRADF-----GYRHTREH-SVYHKDARGHGIGRRLQALIDHAGGNDVHVLIAAIEAENTASIRLHESLGRVVGFSFevgtkfgwldlTelkl----<br/> -MDIRQMNKTHLEHWRLRKLQ-----GHPDdaHLADGEEILQADHLASFIAMADVAIFADASIRHDY-vngcdSSPVVFLGIFVLPFRQV--AKQLIAAVQRWGTNKGCREMASITSPENIISQKVHQAALFEETERVIFYR-----rkr</p> <p><b>SARST:</b> aliSize=132 (resi) RMSD=4.12 (Å)<br/> sv-ELRDATVDDISGIEIYNDAVVnttaiwNEVVdLENRKDWFAAARTSRGFPVIVAILDCKVAGYSYGDWRADF-----DWRADFgyrHTREH-----SVYHKDARGHGIGRRLQALIDHAGGNDVHVLIAAIEAENTASIRLHESLGRVVGFSFevgtkfgwldlTelkl<br/> --mDIRQMNKTHLEHWRLRKLQ-----GHPDdaHLADGEEILQADHLASFIAMADVAIFADASIRHDY-vngcdSSPVVFLGIFVLPFRQV--AKQLIAAVQRWGTNKGCREMASITSPENIISQKVHQAALFEETERVIFYRKRc-----</p> <p><b>BLAST:</b> aliSize=39 (resi) iden=16.55% (24/145) simi=26.90% (39/145)<br/> svelrdatvddlsgieiyndavvnttaiwnevvvdenrkdwfaartsrgfpvi-----VAILDCKVAGYSYGDWRADF-----DWRADFgyrHTREH-----SVYHKDARGHGIGRRLQALIDHAGGNDVHVLIAAIEAENTASIRLHESLGRVVGFSFevgtkfgwldlTelkl<br/> -----mdiromnktthlehwrlrklqwpghpddahladgeeilqadhlasfiAMADVAIFADASIRHDY-vngcdSSPVVFLGIFVLPFRQV--AKQLIAAVQRWGTNKGCREMASITSPENIISQKVHQAALFEETERVIFYRKRc-----</p> <p>-----fs-<br/> vifyrkr-----</p> <p><b>Proposed:</b> aliSize=137 (resi) RMSD=2.04 (Å)<br/> sVELRDATVDDISGIEIYNDAVVnttaiwnEVVVLENRKDWFAAARTSRGFPVIVAILDCKVAGYSYGDWRADF-----RHTREH-SVYHKDARGHGIGRRLQALIDHAGGNDVHVLIAAIEAENTASIRLHESLGRVVGFSFevgtkfgwldlTelkl<br/> -MDIRQMNKTHLEHWRLRKLQ-----GHPDdaHLADGEEILQADHLASFIAMADVAIFADASIRHDY-vngcdSSPVVFLGIFVLPFRQV--AKQLIAAVQRWGTNKGCREMASITSPENIISQKVHQAALFEETERVIFYRKRc-----</p>                                                                                                                                                                                                                                                      |

|     |                                       |   |                                                                                                                                                                                                                                                                                                                                                                                                                                                                                                                                                                                                                                                                                                                                                                                                                                                                                                                                                                                                                                                                                                                                                                                                                                                                                                                                                                                                                                                                                                                                                                                                                                                                                                                                                                                                                                                                                                                                                                                            |
|-----|---------------------------------------|---|--------------------------------------------------------------------------------------------------------------------------------------------------------------------------------------------------------------------------------------------------------------------------------------------------------------------------------------------------------------------------------------------------------------------------------------------------------------------------------------------------------------------------------------------------------------------------------------------------------------------------------------------------------------------------------------------------------------------------------------------------------------------------------------------------------------------------------------------------------------------------------------------------------------------------------------------------------------------------------------------------------------------------------------------------------------------------------------------------------------------------------------------------------------------------------------------------------------------------------------------------------------------------------------------------------------------------------------------------------------------------------------------------------------------------------------------------------------------------------------------------------------------------------------------------------------------------------------------------------------------------------------------------------------------------------------------------------------------------------------------------------------------------------------------------------------------------------------------------------------------------------------------------------------------------------------------------------------------------------------------|
| 537 | <p>1yr0A (163)</p> <p>1s5kA (153)</p> | C | <p>16.99</p> <p><b>TM-align:</b> aliSize=133 (resi) RMSD=2.43 (Å)<br/> -----SVELRDAIVDDLSGI-EIYNDAVvnttaiwnEVVV--LENRKDWFAARTSRGFPVIVAILDQKVAIYASYGDWRAFDG-----YRHTREH-SVYVHKDARGHGIGKRL-QALIDHAGGNDVHVLIAAIEAENTASIRLHESLGRVVGFRFSEVGTkfgrwldltcelkl-----<br/> glvprgshMDIRQMNKTHLHWRGLRKQLWP-----GHPDahHLADGEEILO--ADHLASFIAMADGVAITGFADASIRHDY--vngcdSSPVVFLGIFVLPSPFRQVAKOLIaVQRWGTNKGCREMASDTSPENTISQKVHQAALGFEETERVI-FY-----rkrc</p> <p><b>SARST:</b> aliSize=137 (resi) RMSD=4.08 (Å)<br/> s-----VELRDAIVDDLSGI-EIYNDAVvnttaiwnEVVV--LENRKDWFAARTSRGFPVIVAILDQKVAIYASYGDWRAFDG-----YRHTREH-SVYVHKDARGHGIGKRL-QALIDHAGGNDVHVLIAAIEAENTASIRLHESLGRVVGFRFSEVGT--kfgrwldltcelkl<br/> -glvprgshMDIRQMNKTHLHWRGLRK-----QLW---PGHPDahHLADGEEILOaDHLASFIAMADGVAITGFADASIRHDYVNGCDSSPVVFLGIFVLPSPFRQVAKOLIaVQRWGTNKGCREMASDTSPENTISQKVHQAALGFEETERVIIFYRKRc-----</p> <p><b>BLAST:</b> aliSize=39 (resi) iden=15.69% (24/153) simi=25.49% (39/153)<br/> sveldratvddlsgeiyndavvnttaiwnevvvdlenrkdwfaartsrgfpvi-----VAI LDGKVAIYASYG---DW-RAFVGYRHTREHSVYVHKDARGHGIGKRL-QALIDHAGGNDVHVLIAAIEAENTASIRLHESLGRVVGFRFSEVGTkfgrwldltcelkl<br/> -----glvprgshmdi r qm n k t h l e h w r g l r k q l w p g h p d a h l a d g e e i l q a d h l a s f i a m a d g v a i t g f a d a s i r h d y v n g c d s s p v v f l e g i f v l p s p f r q v a k o l i a v q r w g t n k g c r e m a s d t s p e n t i s q k v h q a l g f e e t e r v i f y r k r c -----</p> <p>SLGFRVVG-----fs evgtkfgrwldltcelkl<br/> ALGFEETERVI ifyrkr-----</p> <p><b>Proposed:</b> aliSize=137 (resi) RMSD=2.02 (Å)<br/> -----SVELRDAIVDDLSGIMEIYNDAVvnttaiwnEVVV--LENRKDWFAARTSRGFPVIVAILDQKVAIYASYGDWRAFDG-----RHTREH-SVYVHKDARGHGIGKRL-QALIDHAGGNDVHVLIAAIEAENTASIRLHESLGRVVGFRFSEVGTkfgrwldltcelkl<br/> glvprgshMDIRQMNKTHLHWRGLRKQLWP-----GHPDahHLADGEEILO--ADHLASFIAMADGVAITGFADASIR-HD--vngcdsSPVVFLGIFVLPSPFRQVAKOLIaVQRWGTNKGCREMASDTSPENTISQKVHQAALGFEETERVI-----IFYRKRcC</p>                                     |
| 538 | <p>1yr0A (163)</p> <p>1z4eA (150)</p> | C | <p>19.33</p> <p><b>TM-align:</b> aliSize=139 (resi) RMSD=3.00 (Å)<br/> SVELRDAIVDDLSGI-EIYNDAVvnttaiwneVVV--DLENRKDWFAARTSRGFPVIVAILDQKVAIYASYGDWraFDGY--RHTREHS-VYVHKDARGHGIGKRL-QALIDHAGGNDVHVLIAAIEAENTASIRLHESLGRVVGFRFSEVGTkfgrwldltcelkl-<br/> HVTIREATEGDLEQmVHMLADD--VL--GRKRERYekLPVSYVRAFKEIKKDKnNELIVACNGEEIVGMLQVTF--PYLTYqgSWRATIEgvrTHSAARGQIGSQVcWALERAKERGCHLIQLTTDKORPDALRFYEQLGFKASHEGL-KMH-----f</p> <p><b>SARST:</b> aliSize=137 (resi) RMSD=4.59 (Å)<br/> s-VELRDAIVDDLSGIEIYND---AVVNTtaiwneVVV--DLENRKDWFAARTSRGFPVIVAILDQKVAIYASYGDWRAFDG--RHTREHSVY---VHKDARGHGIGKRL-QALIDHAGGNDVHVLIAAIEAENTASIRLHESLGRVVGFRFSEVGTkfgrwldltcelkl<br/> -hVTIREATEGDLEQmVHMLADDvLGRKRERYEKLPVSYVRAFKEIKKDKNNEIIVACNGEEIVGMLQVTF--TPYLTYQGSWRATIEgvrTHSAARGQIGSQVcWALERAKERGCHLIQLTTDKORPDALRFYEQLGFKASHEGLkmhf-----</p> <p><b>BLAST:</b> aliSize=63 (resi) iden=22.67% (34/150) simi=42.00% (63/150)<br/> s-VELRDAIVDDLSGIEIYND---AVVNTtaiwneVVV--DLENRKDWFAARTSRGFPVIVAILDQKVAIYASYGDWRAFDG--RHTREHSVYVHKDARGHGIGKRL-QALIDHAGGNDVHVLIAAIEAENTASIRLHESLGRVVGFRFSEVGTkfgrwldltcelkl<br/> -hVTIREATEGDLEQmVHMLADDvLGRKRERYEKLPVSYVRAFKEIKKDKNNEIIVACNGEEIVGMLQVTF--TPYLTYQGSWRATIEgvrTHSAARGQIGSQVcWALERAKERGCHLIQLTTDKORPDALRFYEQLGFKASHEGLkmhf-----</p> <p><b>Proposed:</b> aliSize=136 (resi) RMSD=2.05 (Å)<br/> SVELRDAIVDDLSGIMEIYNDAVvnttaiwneVVV--DLENRKDWFAARTSRGFPVIVAILDQKVAIYASYGDWrafdgYR-----HTREHS-VYVHKDARGHGIGKRL-QALIDHAGGNDVHVLIAAIEAENTASIRLHESLGRVVGFRFSEVGTkfgrwldltcelkl<br/> HVTIREATEGDLEQmVHMLADD--VL--Gr-KRERYekLPVSYVRAFKEIKKDKNNEIIVACNGEEIVGMLQVTF-----TPyltyqgsWRATIEgvrTHSAARGQIGSQVcWALERAKERGCHLIQLTTDKORPDALRFYEQLGFKAS--H-----EGLKMHF-</p>                                                                                                                                                                                                                                                                                                        |
| 539 | <p>1yr0A (163)</p> <p>2f5iA (167)</p> | C | <p>16.56</p> <p><b>TM-align:</b> aliSize=140 (resi) RMSD=3.00 (Å)<br/> SVELRDAIVDDLSGI-EIYNDAVvnttaiwneVVV--VDLENRKDWFAARTSRGFPVIVAILDQKVAIYASYGDWraFDG--YRHTREH-SVYVHKDARGHGIGKRL-QALIDHAGGNDVHVLIAAIEAENTASIRLHESLGRVVGFRFSEVGTkfgrwldltcelkl-----<br/> KFVIRPATAAACSDFLRLIKELAKYKEY--MEEQiLTKDLLEDGFG-EHPFYHCLVAEVPkehwtpeghSIVGFAMFYFT--YDpwIGKLLYLeDFVMSYRQFGIGSEILKNSQVAMRCRCSSMHFLVAEWNEPSINFYKRRASDLSsseeGwrlfkikeyllkmat-----</p> <p><b>SARST:</b> aliSize=127 (resi) RMSD=4.30 (Å)<br/> sv-ELRDAIVDDLSGIEIYNDVAVNTTtaiwneVVV--VDLENRKDWFAARTSRGFPVIVAILDQKVAIYASYGDWRAFDG--YRHTREH-SVYVHKDARGHGIGKRL-QALIDHAGGNDVHVLIAAIEAENTASIRLHESLGRVVGFRFSEVGTkfgrwldltcelkl<br/> --kfVIRPATAAACSDFLRLIKELAKYKEYMEEQVILT-----EKDLLEDGFGehpfyhCLVAEVPkehwtpeghSIVGFAMFYFT--TYDpwIGKLLYLeDFVMSYRQFGIGSEILKNSQVAMRCRCSSMHFLVAEWNEPSINFYKRRASDLSsseeGwrlfkikeyllkmat-----</p> <p><b>BLAST:</b> aliSize=33 (resi) iden=12.50% (20/163) simi=20.62% (33/163)<br/> sveldratvddlsgeiyndavvnttaiwnevvvdlenrkdwfaartsrgfpvivaieldgk-----VAGYASIGDWRADFYG--RHTREHSVYVHKDARGHGIGKRL-QALIDHAGGNDVHVLIAAIEAENTASIRLHESLGRVVGFRFSEVGTkfgrwldltcelkl<br/> -----kfvirpataadcsdilrlikelakyeymeeqvilttekdllldgfghep f y h c l v a e v p k e h w t p e g h s i v g f a m f y f t y d p w i g k l l y l e d f f m s y r q f g i g s e i l k n s q v a m r c r c s s m h f l v a e w n e p s i n f y k r r a s d l s s e e g w r l f k i k e y l l k m a t -----</p> <p>aaieAENTASIRLHESL-----frvvgfrfsevgtkfgrwldltcelkl<br/> A---EWNEPSINFYKRRASDLSsseeGwrlfkikeyllkmat-----</p> <p><b>Proposed:</b> aliSize=145 (resi) RMSD=2.22 (Å)<br/> SVELRDAIVDDLSGIMEIYNDAVvnttaiwneVVV--VDLENRKDWFA---ARTsrgFPVIVAILDQKVAIYASYGDWrafdGY--RHTREH-SVYVHKDARGHGIGKRL-QALIDHAGGNDVHVLIAAIEAENTASIRLHESLGRVVGFRFSEVGTkfgrwldltcelkl<br/> KFVIRPATAAACSDFLRLIKELAKYKEY--MEEQiLTKDLLEDGFGehpPF---YHCLVAEVPkehwtpeghSIVGFAMFYFT--YDpwIGKLLYLeDFVMSYRQFGIGSEILKNSQVAMRCRCSSMHFLVAEWNEPSINFYKRRASDLSsseeGwrlfkikeyllkmat-----</p> |

|     |                                                     |   |       |                                                                                                                                                                                                                                                                                                                                                                                                                                                                                                                                                                                                                                                                                                                                                                                                                                                                                                                                                                                                                                                                                                               |
|-----|-----------------------------------------------------|---|-------|---------------------------------------------------------------------------------------------------------------------------------------------------------------------------------------------------------------------------------------------------------------------------------------------------------------------------------------------------------------------------------------------------------------------------------------------------------------------------------------------------------------------------------------------------------------------------------------------------------------------------------------------------------------------------------------------------------------------------------------------------------------------------------------------------------------------------------------------------------------------------------------------------------------------------------------------------------------------------------------------------------------------------------------------------------------------------------------------------------------|
| 540 | <p>1yr0A<br/>(163)</p> <hr/> <p>2g3tA<br/>(169)</p> | C | 16.56 | <p>TM-align: aliSize=141 (resi) RMSD=3.11 (Å)<br/> SVELRDATVDDLSGI-EIYNDVAVNNTaIWNVVDLENRKDWFAArTSRGFPVIVAIL--DG----KVAIYASYGDWraFfG-YRHTREH-SVYVHKDARGHGIGKRL-OALIDHAGGNDVHVLIAAEAEENTASIRLHESLGRVVG--FSEVgTkfgRwldltcelkl-----kidkeyllkmatee</p> <p>SARST: aliSize=128 (resi) RMSD=4.15 (Å)<br/> sv--ELRDATVDDLSGI-EIYNDVAVNNTaIWNVVDLENRKDWFAArTSRGFPVIVAIL--DG----KVAIYASYGDWraFfG-YRHTREH-SVYVHKDARGHGIGKRL-OALIDHAGGNDVHVLIAAEAEENTASIRLHESLGRVVG--FSEVgTkfgRwldltcelkl-----grfsevgtkfg</p> <p>rwldltcelkl</p> <p>BLAST: aliSize=33 (resi) iden=12.50% (20/163) simi=20.62% (33/163)<br/> sveldatvddlsgieiyndavvnttaiwnevvvdlenrkdwfaartsrgfpvivailldgk-----VAGYASIGdWRAFDGY--RHTREHSVYVHKDARGHGIGKRL-OALIDHAGGNDVHVLIAAEAEENTASIRLHESLGRVVG--FSEVgTkfgRwldltcelkl-----grfsevgtkfg</p> <p>faieAEENTASIRLHESLGRVVG--FSEVgTkfgRwldltcelkl</p> <p>Proposed: aliSize=144 (resi) RMSD=2.21 (Å)<br/> SVELRDATVDDLSGI-EIYNDVAVNNTaIWNVVDLENRKDWFAArTSRGFPVIVAIL--DG----KVAIYASYGDWraFfG-YRHTREH-SVYVHKDARGHGIGKRLMOALIDHAGGNDVHVLIAAEAEENTASIRLHESLGRVVG--FSEVgTkfgRwldltcelkl-----M-EL--KL-</p>               |
| 541 | <p>1yr0A<br/>(163)</p> <hr/> <p>2g3tB<br/>(168)</p> | C | 15.95 | <p>TM-align: aliSize=141 (resi) RMSD=3.04 (Å)<br/> SVELRDATVDDLSGI-EIYNDVAVNNTaIWNVVDLENRKDWFAArTSRGFPVIVAILDG-----KVAIYASYGDWraFfG-YRHTREH-SVYVHKDARGHGIGKRL-OALIDHAGGNDVHVLIAAEAEENTASIRLHESLGRVVG--FSEVgTkfgRwldltcelkl-----kidkeyllkmatee</p> <p>SARST: aliSize=131 (resi) RMSD=4.05 (Å)<br/> sv--ELRDATVDDLSGI-EIYNDVAVNNTaIWNVVDLENRKDWFAArTSRGFPVIVAILDG-----KVAIYASYGDWraFfG-YRHTREH-SVYVHKDARGHGIGKRLMOALIDHAGGNDVHVLIAAEAEENTASIRLHESLGRVVG--FSEVgTkfgRwldltcelkl-----grfsevgtkfgRwldltcelkl</p> <p>lcelkl</p> <p>BLAST: aliSize=33 (resi) iden=12.50% (20/163) simi=20.62% (33/163)<br/> sveldatvddlsgieiyndavvnttaiwnevvvdlenrkdwfaartsrgfpvivailldgk-----VAGYASIGdWRAFDGY--RHTREHSVYVHKDARGHGIGKRL-OALIDHAGGNDVHVLIAAEAEENTASIRLHESLGRVVG--FSEVgTkfgRwldltcelkl-----grfsevgtkfgRwldltcelkl</p> <p>faieAEENTASIRLHESLGRVVG--FSEVgTkfgRwldltcelkl</p> <p>Proposed: aliSize=144 (resi) RMSD=2.11 (Å)<br/> SVELRDATVDDLSGI-EIYNDVAVNNTaIWNVVDLENRKDWFAArTSRGFPVIVAILDG-----KVAIYASYGDWraFfG-YRHTREH-SVYVHKDARGHGIGKRLMOALIDHAGGNDVHVLIAAEAEENTASIRLHESLGRVVG--FSEVgTkfgRwldltcelkl-----ME-L--KL-</p> |
| 542 | <p>1yr0A<br/>(163)</p> <hr/> <p>2vbqA<br/>(147)</p> | C | 17.01 | <p>TM-align: aliSize=133 (resi) RMSD=2.46 (Å)<br/> S-VELRDATVDDLSGI-EIYNDVAVNNTaIWNVVDLENRKDWFAArTSRGFPVIVAILDGKVAIYASYGDWraFfG----YRHTREH-SVYVHKDARGHGIGKRL-OALIDHAGGNDVHVLIAAEAEENTASIRLHESLGRVVG--FSEVgTkfgRwldltcelkl-----rkrc</p> <p>SARST: aliSize=137 (resi) RMSD=4.23 (Å)<br/> s--VELRDATVDDLSGI-EIYNDVAVNNTaIWNVVDLENRKDWFAArTSRGFPVIVAILDGKVAIYASYGDWraFfG----YRHTREH-SVYVHKDARGHGIGKRL-OALIDHAGGNDVHVLIAAEAEENTASIRLHESLGRVVG--FSEVgTkfgRwldltcelkl</p> <p>BLAST: aliSize=39 (resi) iden=16.33% (24/147) simi=26.53% (39/147)<br/> sveldatvddlsgieiyndavvnttaiwnevvvdlenrkdwfaartsrgfpvivailldgk-----VAILDGKVAIYASYGDWraFfG----YRHTREH-SVYVHKDARGHGIGKRLMOALIDHAGGNDVHVLIAAEAEENTASIRLHESLGRVVG--FSEVgTkfgRwldltcelkl-----IFYRKRc</p> <p>VGR-----fsEvgtkfgRwldltcelkl</p> <p>Proposed: aliSize=138 (resi) RMSD=2.13 (Å)<br/> S-VELRDATVDDLSGI-EIYNDVAVNNTaIWNVVDLENRKDWFAArTSRGFPVIVAILDGKVAIYASYGDWraFfG----YRHTREH-SVYVHKDARGHGIGKRLMOALIDHAGGNDVHVLIAAEAEENTASIRLHESLGRVVG--FSEVgTkfgRwldltcelkl-----IFYRKRc</p>                                                                                |

|     |                                |   |       |                                                                                                                                                                                                                                                                                                                                                                                                                                                                                                                                                                                                                                                                                                                                                                                                                                                                                                                                                                                                                                                                                                                                                                                                                                                                                                                                                                                                                                                                                                                                                                                                                                                                                                                                                                                                           |
|-----|--------------------------------|---|-------|-----------------------------------------------------------------------------------------------------------------------------------------------------------------------------------------------------------------------------------------------------------------------------------------------------------------------------------------------------------------------------------------------------------------------------------------------------------------------------------------------------------------------------------------------------------------------------------------------------------------------------------------------------------------------------------------------------------------------------------------------------------------------------------------------------------------------------------------------------------------------------------------------------------------------------------------------------------------------------------------------------------------------------------------------------------------------------------------------------------------------------------------------------------------------------------------------------------------------------------------------------------------------------------------------------------------------------------------------------------------------------------------------------------------------------------------------------------------------------------------------------------------------------------------------------------------------------------------------------------------------------------------------------------------------------------------------------------------------------------------------------------------------------------------------------------|
| 543 | 1yr0A (163)<br><br>2vxkA (165) | C | 14.72 | <p><b>TM-align:</b> aliSize=132 (resi) RMSD=2.57 (Å)<br/>-----S-VELRDATVDLS-GI-ETIYNDAVVnttaiwneVVD-LNRKDWFAARTS-G-FPVIIVAIL-DKVAIYASYGDWraFDGY---RHTREHS-VYVHDARHGIGKRL-OALIDHGGNDVHVLAAIEAENTasIRLHESLGRVVRFS---evgtkfgrowthltdcelkl-<br/>entplfspslispdvlavlpadyTIRPLCRSDYKRYLDVLRVLT-----VGDInEQWNSRYEWIRAsDeYLLVCDgEGRIVTGLVVE--RKFHsIGMVGHIEdIAVEGQOKKLLIQAIDYVEKVGCKYKTLDCSEAN--EGFYIKCGFKRAGLEMAHY-----y</p> <p><b>SARST:</b> aliSize=132 (resi) RMSD=3.82 (Å)<br/>s-----VELRDATVDLSGIEIYNDAVVnttaiwneVVD-LNRKDWFAARTS-RGFPVIVAIL-DKVAIYASYGDWraFDGYRHTREHSV---YVHDARHGIGKRL-OALIDHGGNDVHVLAAIEAENTasIRLHESLGRVVRFS---evgtkfgrowthltdcelkl-<br/>-entplfspslispdvlavlpadyTIRPLCRSDYKRYLDVLRVLT-----RVLTTVGDIENEQWNSRYEWIRAsDEYYLLVVCdGEGRIVTGLVVE-ERKFHSLGMVGHIEdIAVEGQOKKLLIQAIDYVEKVGCKYKTLDCSEAN--EGFYIKCGFKRAGLEManyy-----</p> <p><b>BLAST:</b> aliSize=42 (resi) iden=14.38% (23/163) simi=26.25% (42/163)<br/>sveldatvddlsgieiyndavvnttaiwnevvvdlenrkdwaarts-----entplfspslispdvlavlpadytirplcrsdykRQFPVIVAILDgkVAGYASYGDWraFDGYRHTREHSVYVHDARHGIGKRL-OALIDHGGNDVHVLAAIEAENTasIRLHESLGRVVRFS---evgtkfgrowthltdcelkl-<br/>-----entplfspslispdvlavlpadytirplcrsdykRQFPVIVAILDgkVAGYASYGDWraFDGYRHTREHSVYVHDARHGIGKRL-OALIDHGGNDVHVLAAIEAENTasIRLHESLGRVVRFS---evgtkfgrowthltdcelkl-<br/>-----rwldltcelkl<br/>ktildseanegyikcgfkraglemahyy-----</p> <p><b>Proposed:</b> aliSize=134 (resi) RMSD=2.32 (Å)<br/>-----S-VELRDATVDLS-GI-METIYNDAVVnttaiwneVVD-LNRKDWFAARTS-G-FPVIIVAIL-DKVAIYASYGDWraFDGY---RHTREHS-VYVHDARHGIGKRLMOALIDHGGNDVHVLAAIEAENTasIRLHESLGRVVRFS---evgtkfgrowthltdcelkl-<br/>entplfspslispdvlavlpadyTIRPLCRSDYKRYLDVLRVLT-----VGDInEQWNSRYEWIRAsDeYLLVCDgEGRIVTGLVVE--RKFHsIGMVGHIEdIAVEGQOKKLLIQAIDYVEKVGCKYKTLDCSEAN--EGFYIKCGFKRAGLEMAHY-Yc-----<br/>melkl<br/>-----</p> |
| 544 | 1yvoA (169)<br><br>1z4eA (150) | C | 18.67 | <p><b>TM-align:</b> aliSize=138 (resi) RMSD=2.74 (Å)<br/>--STRDAGVADLPGILATYNDAVGNTTAIWNETPV---DLANROAWFDTRAROG-YPILVASDAAGVLYASYGDWRPFEGF---RGTVEHS-VYVRDDORCKGLVOLLOALIERARAOGLHV-VAAIESGNAASIGLHRRIGFEISGPOVQgkfgrowthltdfqlndptrsap-<br/>hvtTREATEGLEQMVHMLADD--VL--GRKRERYekpLPVSYVRAFKI IKDKKNELIVACNG-EEIVGMLQVTF--PYLTyqgSWRATIEgVTHSAARGOGISOLVCWATERAKERCHLIQLITDKQRPDALRFYEQLGFKASHHEGLKMH-----f</p> <p><b>SARST:</b> aliSize=136 (resi) RMSD=4.37 (Å)<br/>s---STRDAGVADLPGILATYNDAVGNTTAIWNETPV---DLANROAWFDTRAROGYPILVASDAAGVLYASYGDWRPFEGFRGTVEHSVY---VRDDORCKGLVOLLOALIERARAOGLHVVA-AIESGNAASIGLHRRIGFEISG-----qpqvqkfgrowthltdfqlndptrsap<br/>-hvtTREATEGLEQMVHMLADDLGRKRERYEKLPVSYVRAFKI IKDKKNELIVACNG-EEIVGMLQVTF--PYLTyqgSWRATIEgVTHSAARGOGISOLVCWATERAKERCHLIQLITDKQRPDALRFYEQLGFKASHHEglkmhf-----</p> <p><b>BLAST:</b> aliSize=63 (resi) iden=21.33% (32/150) simi=42.00% (63/150)<br/>--STRDAGVADLPGILATYNDAVGNTTAIWNETPV---DLANROAWFDTRAROGYPILVASDAAGVLYASYGDWRPFEGFRGTVEHSVYVYVRDDORCKGLVOLLOALIERARAOGLHVVA-AIESGNAASIGLHRRIGFEISG-----rrlgfeisgqpqvqkfg<br/>hvtTREATEGLEQMVHMLADDLGRKRERYEKLPVSYVRAFKI IKDKKNELIVACNG-EEIVGMLQVTF--PYLTyqgSWRATIEgVTHSAARGOGISOLVCWATERAKERCHLIQLITDKQRPDALRFYEQLGFKASHHEglkmhf-----<br/>rwldltfqlndptrsap<br/>-----</p> <p><b>Proposed:</b> aliSize=136 (resi) RMSD=1.92 (Å)<br/>--STRDAGVADLPGILATYNDAVGNTTAIWNETPV---DLANROAWFDTRAROG-YPILVASDAAGVLYASYGDWRPFEGF---RGTVEHS-VYVRDDORCKGLVOLLOALIERARAOGLHVVA-AIESGNAASIGLHRRIGFEISGmpqvqkfgrowthltdfqlndptrsap<br/>hvtTREATEGLEQMVHMLADD--VL--Gr--KRERYekpLPVSYVRAFKI IKDKKNELIVACNG-EEIVGMLQVTF--PYLTyqgSWRATIEgVTHSAARGOGISOLVCWATERAKERCHLIQLITDKQRPDALRFYEQLGFKASHHE-----EGLKMH-----</p>                                                                                                |
| 545 | 1yvoA (169)<br><br>2f5iA (167) | C | 17.96 | <p><b>TM-align:</b> aliSize=139 (resi) RMSD=2.93 (Å)<br/>--STRDAGVADLPGILATYNDAVGNTTAIWNETPV---DLANROAWFDTRAROG-YPILVASDAAGVLYASYGDWRPFEGFRGTVEHS-VYVRDDORCKGLVOLLOALIERARAOGLHV-VAAIESGNAASIGLHRRIGFEISGPOVQgkfgrowthltdfqlndptrsap-<br/>kfvTPITAACSDLRLIKELAKYEY--MEEQVILTTEKDLLEDGFGEHPFHCLVAEVPKEHWTPegHSIVGFMYFT--YDPWIGKLLYLEDFEYMSYKGFITGSEIKNSQVAMRCRCSSMHFLVAEWNEPSINFYKRCASDLSseegwrlfkidkeyllkmat-----kidkeyll</p> <p>----<br/>kmat</p> <p><b>SARST:</b> aliSize=128 (resi) RMSD=3.88 (Å)<br/>s---STRDAGVADLPGILATYNDAVGNTTAIWNETPV---DLANROAWFDTRAROG-YPILVASDAAGVLYASYGDWRPFEGFRGTVEHS-VYVRDDORCKGLVOLLOALIERARAOGLHVVA-AIESGNAASIGLHRRIGFEISG-----sqpqvqkfgrowthltdfqlndptrsap<br/>-kfvTPITAACSDLRLIKELAKYEY--MEEQVILTTEKDLLEDGFGEHPFHCLVAEVPKEHWTPegHSIVGFMYFT--YDPWIGKLLYLEDFEYMSYKGFITGSEIKNSQVAMRCRCSSMHFLVAEWNEPSINFYKRCASDLSseegwrlfkidkeyllkmat-----</p> <p><b>BLAST:</b> aliSize=59 (resi) iden=22.89% (38/167) simi=35.54% (59/167)<br/>s---STRDAGVADLPGILATYNDAVGNTTAIWNETPV---DLANROAWFDTRAROG-YPILVASDAAGVLYASYGDWRPFEGFRGTVEHS-VYVRDDORCKGLVOLLOALIERARAOGLHVVA-AIESGNAASIGLHRRIGFEISG-----feisqpqvqkfgrowthltdfqlndptrsap<br/>-kfvTPITAACSDLRLIKELAKYEY--MEEQVILTTEKDLLEDGFGEHPFHCLVAEVPKEHWTPegHSIVGFMYFT--YDPWIGKLLYLEDFEYMSYKGFITGSEIKNSQVAMRCRCSSMHFLVAEWNEPSINFYKRCASDLSseegwrlfkidkeyllkmat-----</p> <p><b>Proposed:</b> aliSize=147 (resi) RMSD=2.35 (Å)<br/>--STRDAGVADLPGILATYNDAVGNTTAIWNETPV---DLANROAWFDTRAROG-YPILVASDAAGVLYASYGDWRPFEGFRGTVEHS-VYVRDDORCKGLVOLLOALIERARAOGLHVVA-AIESGNAASIGLHRRIGFEISGmpqvqkfgrowthltdfqlndptrsap<br/>kfvTPITAACSDLRLIKELAKYEY--MEEQVILTTEKDLLEDGFGEHPFHCLVAEVPKEHWTPegHSIVGFMYFT--YDPWIGKLLYLEDFEYMSYKGFITGSEIKNSQVAMRCRCSSMHFLVAEWNEPSINFYKRCASDLS-----SEGWRLKIDKEYILKmat---</p>                                              |

|     |                                             |   |       |                                                                                                                                                                                                                                                                                                                                                                                                                                                                                                                                                                                                                                                                                                                                                                                                                                                                                                                                                                                                                                                                                                                                                                                                                                                                                                                                                                                                                                                                                                                                                                                                                                                                                                                                                                                                                                                                                                                                            |
|-----|---------------------------------------------|---|-------|--------------------------------------------------------------------------------------------------------------------------------------------------------------------------------------------------------------------------------------------------------------------------------------------------------------------------------------------------------------------------------------------------------------------------------------------------------------------------------------------------------------------------------------------------------------------------------------------------------------------------------------------------------------------------------------------------------------------------------------------------------------------------------------------------------------------------------------------------------------------------------------------------------------------------------------------------------------------------------------------------------------------------------------------------------------------------------------------------------------------------------------------------------------------------------------------------------------------------------------------------------------------------------------------------------------------------------------------------------------------------------------------------------------------------------------------------------------------------------------------------------------------------------------------------------------------------------------------------------------------------------------------------------------------------------------------------------------------------------------------------------------------------------------------------------------------------------------------------------------------------------------------------------------------------------------------|
| 546 | <p>1yvoA (169)</p> <hr/> <p>2fe7B (166)</p> | C | 18.07 | <p>TM-align: aliSize=139 (resi) RMSD=3.03 (Å)<br/> s---S---RDAGVADLPG---LAAYNDVAVGNTTATWNETP-VDLANROAWFDT-rAROGYPI-VASDAA-----GVLGYASVGDWRpFEG--FRGTVEH-SVYVRDORCKLIVOLVLAIERARAOGLHV-VAAIESGNAASIGLHRLRFEISGPOVGGqkfgwrldltfqlndptrsap-----ridgealrkmae<br/> enlyfqghmtLEIRPVPAAAEQILAFIIEELADYERARHEVVTIVVEGIRRSLEFA-EGSPTRALMCLSE--GRPIGYAVFFYSY--STWlGRNGIYLEDLYVTPEYRCVGAARRLRELAREAVANDCGRLWVSLDWNQPAIDFYRSIHALPODEWVRY-----</p> <p>SARST: aliSize=130 (resi) RMSD=4.26 (Å)<br/> s---S---RDAGVADLPG---LAAYNDVAVGNTTATWNETP-VDLANROAWFDT-rAROGYPI-VASDAA-----GVLGYASVGDWRpFEGFRGTVEH--SVYVRDORCKLIVOLVLAIERARAOGLHVVA-AIESGNAASIGLHRLRFEI-----s---gppqvqkfgwrldlt<br/> -enlyfqghmtLEIRPVPAAAEQILAFIIEELADYERARHEVVTIVVEGIRRSLEFA-EGSPTRALMCLSE--GRPIGYAVFFYSY--STWlGRNGIYLEDLYVTPEYRCVGAARRLRELAREAVANDCGRLWVSLDWNQPAIDFYRSIHALPODEWVRY-----ridgealrkmae-----<br/> fqlndptrsap<br/> -----</p> <p>BLAST: aliSize=62 (resi) iden=25.30% (42/166) simi=37.35% (62/166)<br/> s---S---RDAGVADLPG---LAAYNDVAVGNTTATWNETP-VDLANROAWFDT-rAROGYPI-VASDAA-----GVLGYASVGDWRpFEGFRGTVEH-SVYVRDORCKLIVOLVLAIERARAOGLHVVA-AIESGNAASIGLHRLRFEISGPOVGGqkfgwrldltfqlndptrsap-----ridgealrkmae<br/> -enlyfqghmtLEIRPVPAAAEQILAFIIEELADYERARHEVVTIVVEGIRRSLEFA-EGSPTRALMCLSE--GRPIGYAVFFYSY--STWlGRNGIYLEDLYVTPEYRCVGAARRLRELAREAVANDCGRLWVSLDWNQPAIDFYRSIHALPODEWVRY-----ridgealrkmae-----<br/> dltfqlndptrsap<br/> -----</p> <p>Proposed: aliSize=146 (resi) RMSD=2.38 (Å)<br/> ---S---RDAGVADLPG---LAAYNDVAVGNTTATWNETP-VDLANROAWFDT-rAROGYPI-VASDAA-----GVLGYASVGDWRpFEGFRGTVEH-SVYVRDORCKLIVOLVLAIERARAOGLHVVA-AIESGNAASIGLHRLRFEISGPOVGGqkfgwrldltfqlndptrsap-----ridgealrkmae<br/> enlyfqghmtLEIRPVPAAAEQILAFIIEELADYERARHEVVTIVVEGIRRSLEFA-EGSPTRALMCLSE--GRPIGYAVFFYSY--STWlGRNGIYLEDLYVTPEYRCVGAARRLRELAREAVANDCGRLWVSLDWNQPAIDFYRSIHALPODEWVRY-----ridgealrkmae-----</p>                                                                      |
| 547 | <p>1yvoA (169)</p> <hr/> <p>2g3tB (168)</p> | C | 18.45 | <p>TM-align: aliSize=139 (resi) RMSD=2.91 (Å)<br/> ---S---RDAGVADLPG---LAAYNDVAVGNTTATWNETP-VDLANROAWFDT-rAROGYPI-VASDAA-----GVLGYASVGDWRpFEGFRGTVEH-SVYVRDORCKLIVOLVLAIERARAOGLHV-VAAIESGNAASIGLHRLRFEISGPOVGGqkfgwrldltfqlndptrsap-----ridgealrkmae<br/> kfv---P---TAAACSD---LRLIKELAKYEY--MEEQVILTEKDLELDGFG-EHPFHCLVAEVPKehwtpEGHSIVGFAMFYFTY-D-PwIGKLLYLEDFVMSYRQFICSEILKN---SOVAMRCRCSSMhFLVAEWNEPSINFYKRRASDLSSegwrlf-----kidkeyll<br/> -----<br/> kmate</p> <p>SARST: aliSize=128 (resi) RMSD=3.91 (Å)<br/> s---S---RDAGVADLPG---LAAYNDVAVGNTTATWNETP-VDLANROAWFDT-rAROGYPI-VASDAA-----GVLGYASVGDWRpFEGFRGTVEH-SVYVRDORCKLIVOLVLAIERARAOGLHVVA-AIESGNAASIGLHRLRFEISGPOVGGqkfgwrldltfqlndptrsap-----ridgealrkmae<br/> -kfv---P---TAAACSD---LRLIKELAKYEY--MEEQVILTEKDLELDGFG-EHPFHCLVAEVPKehwtpEGHSIVGFAMFYFTY-D-PwIGKLLYLEDFVMSYRQFICSEILKN---SOVAMRCRCSSMhFLVAEWNEPSINFYKRRASDLSSegwrlf-----kidkeyllkmate-----<br/> ldltfqlndptrsap<br/> -----</p> <p>BLAST: aliSize=59 (resi) iden=22.89% (38/168) simi=35.54% (59/168)<br/> s---S---RDAGVADLPG---LAAYNDVAVGNTTATWNETP-VDLANROAWFDT-rAROGYPI-VASDAA-----GVLGYASVGDWRpFEGFRGTVEH-SVYVRDORCKLIVOLVLAIERARAOGLHVVA-AIESGNAASIGLHRLRFEISGPOVGGqkfgwrldltfqlndptrsap-----ridgealrkmae<br/> -kfv---P---TAAACSD---LRLIKELAKYEY--MEEQVILTEKDLELDGFG-EHPFHCLVAEVPKehwtpEGHSIVGFAMFYFTY-D-PwIGKLLYLEDFVMSYRQFICSEILKN---SOVAMRCRCSSMhFLVAEWNEPSINFYKRRASDLSSegwrlf-----kidkeyllkmate-----<br/> wldltfqlndptrsap<br/> -----</p> <p>Proposed: aliSize=149 (resi) RMSD=2.34 (Å)<br/> ---S---RDAGVADLPG---LAAYNDVAVGNTTATWNETP-VDLANROAWFDT-rAROGYPI-VASDAA-----GVLGYASVGDWRpFEGFRGTVEH-SVYVRDORCKLIVOLVLAIERARAOGLHVVA-AIESGNAASIGLHRLRFEISGPOVGGqkfgwrldltfqlndptrsap-----ridgealrkmae<br/> kfv---P---TAAACSD---LRLIKELAKYEY--MEEQVILTEKDLELDGFG-EHPFHCLVAEVPKehwtpEGHSIVGFAMFYFTY-D-PwIGKLLYLEDFVMSYRQFICSEILKN---SOVAMRCRCSSMhFLVAEWNEPSINFYKRRASDLSSegwrlf-----kidkeyllkmate-----</p>      |
| 548 | <p>1yvoA (169)</p> <hr/> <p>2jevA (169)</p> | C | 17.75 | <p>TM-align: aliSize=139 (resi) RMSD=3.01 (Å)<br/> ---S---RDAGVADLPG---LAAYNDVAVGNTTATWNETP-VDLANROAWFDT-rAROGYPI-VASDAA-----GVLGYASVGDWRpFEGFRGTVEH-SVYVRDORCKLIVOLVLAIERARAOGLHV-VAAIESGNAASIGLHRLRFEISGPOVGGqkfgwrldltfqlndptrsap-----ridgealrkmae<br/> akfv---P---TAAACSD---LRLIKELAKYEY--MEEQVILTEKDLELDGFG-EHPFHCLVAEVPKehwtpEGHSIVGFAMFYFTY-D-PwIGKLLYLEDFVMSYRQFICSEILKN---SOVAMRCRCSSMhFLVAEWNEPSINFYKRRASDLSSegwrlf-----kidkeyll<br/> -----<br/> lkmate</p> <p>SARST: aliSize=129 (resi) RMSD=3.71 (Å)<br/> s---S---RDAGVADLPG---LAAYNDVAVGNTTATWNETP-VDLANROAWFDT-rAROGYPI-VASDAA-----GVLGYASVGDWRpFEGFRGTVEH-SVYVRDORCKLIVOLVLAIERARAOGLHVVA-AIESGNAASIGLHRLRFEISGPOVGGqkfgwrldltfqlndptrsap-----ridgealrkmae<br/> -akfv---P---TAAACSD---LRLIKELAKYEY--MEEQVILTEKDLELDGFG-EHPFHCLVAEVPKehwtpEGHSIVGFAMFYFTY-D-PwIGKLLYLEDFVMSYRQFICSEILKN---SOVAMRCRCSSMhFLVAEWNEPSINFYKRRASDLSSegwrlf-----kidkeyllkmate-----<br/> ldltfqlndptrsap<br/> -----</p> <p>BLAST: aliSize=59 (resi) iden=22.89% (38/169) simi=35.54% (59/169)<br/> s---S---RDAGVADLPG---LAAYNDVAVGNTTATWNETP-VDLANROAWFDT-rAROGYPI-VASDAA-----GVLGYASVGDWRpFEGFRGTVEH-SVYVRDORCKLIVOLVLAIERARAOGLHVVA-AIESGNAASIGLHRLRFEISGPOVGGqkfgwrldltfqlndptrsap-----ridgealrkmae<br/> -akfv---P---TAAACSD---LRLIKELAKYEY--MEEQVILTEKDLELDGFG-EHPFHCLVAEVPKehwtpEGHSIVGFAMFYFTY-D-PwIGKLLYLEDFVMSYRQFICSEILKN---SOVAMRCRCSSMhFLVAEWNEPSINFYKRRASDLSSegwrlf-----kidkeyllkmate-----<br/> rwdltfqlndptrsap<br/> -----</p> <p>Proposed: aliSize=147 (resi) RMSD=2.30 (Å)<br/> ---S---RDAGVADLPG---LAAYNDVAVGNTTATWNETP-VDLANROAWFDT-rAROGYPI-VASDAA-----GVLGYASVGDWRpFEGFRGTVEH-SVYVRDORCKLIVOLVLAIERARAOGLHVVA-AIESGNAASIGLHRLRFEISGPOVGGqkfgwrldltfqlndptrsap-----ridgealrkmae<br/> akfv---P---TAAACSD---LRLIKELAKYEY--MEEQVILTEKDLELDGFG-EHPFHCLVAEVPKehwtpEGHSIVGFAMFYFTY-D-PwIGKLLYLEDFVMSYRQFICSEILKN---SOVAMRCRCSSMhFLVAEWNEPSINFYKRRASDLSSegwrlf-----kidkeyllkmate-----</p> |

|     |                |   |       |                                                                                                                                                                                                                                                                                                                                                                                                                                                                                                                                                                                                                                                                                                                                                                                                                                                                                                                                                                                                                                                                                                                                                                                                                                   |
|-----|----------------|---|-------|-----------------------------------------------------------------------------------------------------------------------------------------------------------------------------------------------------------------------------------------------------------------------------------------------------------------------------------------------------------------------------------------------------------------------------------------------------------------------------------------------------------------------------------------------------------------------------------------------------------------------------------------------------------------------------------------------------------------------------------------------------------------------------------------------------------------------------------------------------------------------------------------------------------------------------------------------------------------------------------------------------------------------------------------------------------------------------------------------------------------------------------------------------------------------------------------------------------------------------------|
| 549 | IyvsA<br>(108) | N | 22.11 | <p><b>TM-align:</b> aliSize=63 (resi) RMSD=2.60 (Å)<br/> vintfdgvadylqtyhklpdnyitkseaqalgwvaskgnladvap-----GKSI--GGDI--SNREGKLPKSGRTWRADINYS-SGFRNSDRILYSSDW-LIYKTTDHYQTFTKR---<br/> -----vsgtvclsalppeatdtlnliaSDGPFpysqDGVVFNRESVLPQSYGYHYEYTVITPgARTGTRRIITGEATqEDYITGDHYATFSLIdqtc</p> <p><b>SARST:</b> aliSize=68 (resi) RMSD=13.18 (Å)<br/> vintfdgvadylqtyhklpdnyit-----KSEAQLGWVA-SKGNladvapgksigGDI--SNREGKLPKSG--RTWREADI-NYTS--GfrnSDRILYSSD-WLIYKTTDHYQTFTK-----ir<br/> -----vsgtvclsalppeatdTLNLIASDGPFpysQD-----GVVFNRESVLPQSYGYHYEYTVITPgARTGTRRIITGEATQEDYITGDHYATFSLIdqtc--</p> <p><b>BLAST:</b> aliSize=30 (resi) iden=22.11% (21/95) simi=31.58% (30/95)<br/> vintfdgvadylqtyhklpdnyitkseaqalgwvaskgnladvapgksig-----GDI--SNREGKLPKSGRTWRADINYS-SGFRN--SDRILYS-SDWLIYKTTDHYQTFTKI-----r<br/> -----vsgtvclsalppeatdtlnliaSDGPFpysqDGVVFNRESVLPQSYGYHYEYTV-ITPgARTGTRRIITGeATQEDYITGDHYATFSLIdqtc-</p> <p><b>Proposed:</b> aliSize=82 (resi) RMSD=2.48 (Å)<br/> viNtfdgvadylqtyhklpdNYITK--SeaQalgWVAS--KGN-LADVAPGKS---iGGDI--SNREGKLPKSG--gRTWREADINYS-SGFRNSDRILYSSDW-LIYKTTDHYQTFTKR---<br/> --V-----SGTVCLIS--A---LPPEaTdtlnLIASDGPFpysqDGVVFNRESVLPQSY-GYHYEYTVITPgARTGTRRIITGEATqEDYITGDHYATFSLIdqtc</p>  |
| 550 | IyvsA<br>(108) | N | 20.83 | <p><b>TM-align:</b> aliSize=63 (resi) RMSD=2.42 (Å)<br/> vintfdgvadylqtyhklpdnyitkseaqalgwvaskgnladvap-----GKSI--GGDI--SNREGKLPKSGRTWRADINYS-SGFRNSDRILYSSDW-LIYKTTDHYQTFTKR---<br/> -----dvsgtvclsalppeatdtlnliaSDGPFpysqDGVVFNRESVLPQSYGYHYEYTVITPgARTGTRRIITGEATqEDYITGDHYATFSLIdqtc</p> <p><b>SARST:</b> aliSize=75 (resi) RMSD=16.61 (Å)<br/> vintf-----DGVADYIQTTHKLPDnyitkseaqalgwvaSKgnladvapgksIGGDI--SNREGKLPKSG--KSGRTWREADINYS-SGFRNSDRILYSS-DWLIYKTTDHYQTFTK-----ir<br/> -----dvsgtvclsalppeATDTLNLIASDGPFp-----YS-----QDGVVFNRESVLPQSYGYHYEYTVITPgARTGTRRIITGeATQEDYITGDHYATFSLIdqtc--</p> <p><b>BLAST:</b> aliSize=30 (resi) iden=22.92% (22/96) simi=31.25% (30/96)<br/> vintfdgvadylqtyhklpdnyitkseaqalgwvaskgnladvapgksig-----GDI--SNREGKLPKSGRTWRADINYS-SGFRN--SDRILYS-SDWLIYKTTDHYQTFTKI-----r<br/> -----dvsgtvclsalppeatdtlnliaSDGPFpysqDGVVFNRESVLPQSYGYHYEYTV-ITPgARTGTRRIITGeATQEDYITGDHYATFSLIdqtc-</p> <p><b>Proposed:</b> aliSize=80 (resi) RMSD=2.42 (Å)<br/> viNtfdgvadylqtyhklpdNYITK--EAQalgWVAS--KGNiADVA-----pgksigGDI--SNREGKLPKSGRTWRADINYS-SGFRNSDRILYSSDW-LIYKTTDHYQTFTKR---<br/> -DV-----SGTVCLISALP--PEATdtlnLIASDGPFpysqDGVVFNRESVLPQSYGYHYEYTVITPgARTGTRRIITGEATqEDYITGDHYATFSLIdqtc</p> |
| 551 | IyvsA<br>(108) | N | 20.83 | <p><b>TM-align:</b> aliSize=63 (resi) RMSD=2.40 (Å)<br/> vintfdgvadylqtyhklpdnyitkseaqalgwvaskgnladvap-----GKS--IGGDI--SNREGKLPKSGRTWRADINYS-SGFRNSDRILYSSDW-LIYKTTDHYQTFTKR---<br/> -----dvsgtvclsalppeatdtlnliaSDGPFpysqDGVVFNRESVLPQSYGYHYEYTVITPgARTGTRRIICGEATqEDYITGDHYATFSLIdqtc</p> <p><b>SARST:</b> aliSize=71 (resi) RMSD=12.90 (Å)<br/> vintfdgvadylqtyhklpdnyit-----KSEAQLGWVaskGNLadvapgksigGDI--SNREGKLPKSG--RTWREADINYS-SGFRNSDRILYSSD-WLIYKTTDHYQTFTK-----ir<br/> -----dvsgtvclsalppeatdTLNLIASDGPF--PYSQ-----DGVVFNRESVLPQSYGYHYEYTVIT-PGARTGTRRIICGEATQEDYITGDHYATFSLIdqtc--</p> <p><b>BLAST:</b> aliSize=30 (resi) iden=22.92% (22/96) simi=31.25% (30/96)<br/> vintfdgvadylqtyhklpdnyitkseaqalgwvaskgnladvapgksig-----GDI--SNREGKLPKSGRTWRADINYS-SGFRN--SDRILYS-SDWLIYKTTDHYQTFTKI-----r<br/> -----dvsgtvclsalppeatdtlnliaSDGPFpysqDGVVFNRESVLPQSYGYHYEYTV-ITPgARTGTRRIICGeATQEDYITGDHYATFSLIdqtc-</p> <p><b>Proposed:</b> aliSize=80 (resi) RMSD=2.16 (Å)<br/> viNtfdgvadylqtyhklpdNYITK--EAQalgWV--AS--KGNiADVA-----pgksigGDI--SNREGKLPKSG--RTWRADINYS-SGFRNSDRILYSSDW-LIYKTTDHYQTFTKR---<br/> -DV-----SGTVCLISALP--PPEaTdtlnLIASDGPFpysqDGVVFNRESVLPQSYGYHYEYTVITPgARTGTRRIICGEATqEDYITGDHYATFSLIdqtc</p>  |
|     | IgmPA<br>(96)  |   |       |                                                                                                                                                                                                                                                                                                                                                                                                                                                                                                                                                                                                                                                                                                                                                                                                                                                                                                                                                                                                                                                                                                                                                                                                                                   |



|     |                                             |   |       |                                                                                                                                                                                                                                                                                                                                                                                                                                                                                                                                                                                                                                                                                                                                                                                                                                                                                                                                                                                                                                                                                                                                                                                                                                                                                                               |
|-----|---------------------------------------------|---|-------|---------------------------------------------------------------------------------------------------------------------------------------------------------------------------------------------------------------------------------------------------------------------------------------------------------------------------------------------------------------------------------------------------------------------------------------------------------------------------------------------------------------------------------------------------------------------------------------------------------------------------------------------------------------------------------------------------------------------------------------------------------------------------------------------------------------------------------------------------------------------------------------------------------------------------------------------------------------------------------------------------------------------------------------------------------------------------------------------------------------------------------------------------------------------------------------------------------------------------------------------------------------------------------------------------------------|
| 552 | <p>lyvsA (108)</p> <hr/> <p>li70A (96)</p>  | N | 22.92 | <p><b>TM-align:</b> aliSize=63 (resi) RMSD=2.38 (Å)<br/> vintfdgvadylqtyhklpdnyi tkseaqalgwvaskgnladvap-----GKS-IGGDI FSNREGKLPgkSgRTWREADInYT-SGFRNSDRILYSSDW-LIYKTTDHYQTFtkR---<br/> -----dvsgtvclsalppeatdtlnliasdgpFPYsQDGVVFQNRRESVLPtQSYGYHEHYTVITPgARTGTRRIITGEATqEDFYIGDHFATFSLIIdqtc</p> <p><b>SARST:</b> aliSize=71 (resi) RMSD=12.76 (Å)<br/> vintfdgvadylqtyhklpdnyi t-----KSEAQALGWvaSKGNLadvapgks iGGDI FSNREGKLPgkSg-RTWREADInYTSGFRNSDRILYSSDW-LIYKTTDHYQTFtk-----ir<br/> -----dvsgtvclsalppeatdtlnliasdgpFPYsQDGVVFQNRRESVLPtQSYGYHEHYTVIT-PGARTGTRRIITGEATqEDFYIGDHFATFSLIIdqtc--</p> <p><b>BLAST:</b> aliSize=30 (resi) iden=21.88% (21/96) simi=31.25% (30/96)<br/> vintfdgvadylqtyhklpdnyi tkseaqalgwvaskgnladvapgks iG-----GGDI FSNREGKLPgkSgRTWREADInYTSGFRN--SDRILYS-SDWLIYKTTDHYQTFtkI-----r<br/> -----dvsgtvclsalppeatdtlnliasdgpfpysqDGVVFQNRRESVLPtQSYGYHEHYTV-ITPgARTrgTRRIITGEATQEDFYIGDHFATFSLIIdqtc-</p> <p><b>Proposed:</b> aliSize=82 (resi) RMSD=2.33 (Å)<br/> vINtfdgvadylqtyhklpDNYITKSEAQALgWV-ASKgN--LaDVAPgKS----iGGDI FSNREGKLPgkSg-RTWREADInYT-SGFRNSDRILYSSDW-LIYKTTDHYQTFtkR---<br/> -DV-----SGTVCLS-AL--PPeATD-TInL-IASD-GPfpysq-DGVVFQNRRESVLPtQ-SyGYHEHYTVITPgARTGTRRIITGEATqEDFYIGDHFATFSLIIdqtc</p>                                                          |
| 553 | <p>lyvsA (108)</p> <hr/> <p>li8vA (96)</p>  | N | 19.79 | <p><b>TM-align:</b> aliSize=63 (resi) RMSD=2.39 (Å)<br/> vintfdgvadylqtyhklpdnyi tkseaqalgwvaskgnladvap-----GKS-IGGDI FSNREGKLPgkSgRTWREADInYT-SGFRNSDRILYSSDW-LIYKTTDHYQTFtkR---<br/> -----dvsgtvclsalppeatdtlnliasdgpFPYsQDGVVFQNRRESVLPtQSYGYHEHYTVITPgARTGTRRIITGEATqEDFYIGDHFATFSLIIdqtc</p> <p><b>SARST:</b> aliSize=71 (resi) RMSD=12.77 (Å)<br/> vintfdgvadylqtyhklpdnyi t-----KSEAQALGWvaSKGNLadvapgks iGGDI FSNREGKLPgkSg-RTWREADInYTSGFRNSDRILYSSDW-LIYKTTDHYQTFtk-----ir<br/> -----dvsgtvclsalppeatdtlnliasdgpFPYsQDGVVFQNRRESVLPtQSYGYHEHYTVIT-PGARTGTRRIITGEATqEDFYIGDHFATFSLIIdqtc--</p> <p><b>BLAST:</b> aliSize=30 (resi) iden=21.88% (21/96) simi=31.25% (30/96)<br/> vintfdgvadylqtyhklpdnyi tkseaqalgwvaskgnladvapgks iG-----GGDI FSNREGKLPgkSgRTWREADInYTSGFRN--SDRILYS-SDWLIYKTTDHYQTFtkI-----r<br/> -----dvsgtvclsalppeatdtlnliasdgpfpysqDGVVFQNRRESVLPtQSYGYHEHYTV-ITPgARTrgTRRIITGEATQEDFYIGDHFATFSLIIdqtc-</p> <p><b>Proposed:</b> aliSize=81 (resi) RMSD=2.27 (Å)<br/> vINtfdgvadylqtyhklpdNYITK--seaqalgwVASKGN-LADVAP---GKSI---GGDI FSNREGKLPgkSg-RTWREADInYT-SGFRNSDRILYSSDW-LIYKTTDHYQTFtkR---<br/> -DV-----SGTVCLS-----ALPPEATDTInLiasdGFPYsQDGVVFQNRRESVLPtQ-SyGYHEHYTVITPgARTGTRRIITGEATqEDFYIGDHFATFSLIIdqtc</p>                                                           |
| 554 | <p>lyvsA (108)</p> <hr/> <p>llovA (104)</p> | N | 11.54 | <p><b>TM-align:</b> aliSize=57 (resi) RMSD=2.88 (Å)<br/> vintfdgvadylqtyhklpdnyi tkseaqal gwvaskgnladvap-----KS--IGGDI FSNREGKLPgkSgRTWREADIn-----YTSFRNSDRILYSSDWLI-YKTtDh-----YQTFtkir<br/> -----acdycgsncysssdvstaqaagyklhedGETVGSnSYPHKYNNEGDFDfSVS-SPYYAWPLsSgdvYSGSPGADRvVFNENNQLaGVI-ThtgasgmnFVEct---</p> <p><b>SARST:</b> aliSize=80 (resi) RMSD=17.21 (Å)<br/> vintfdgvadylqtyh---KLPDNYIT-KSEA-----QALGWVASKGNladvapGKSIggdIFSNREGKLPgkSgRTWREADIn-----YTSFRNSDRILYSSDWLI-YKTtDh--YQTFtk--ir<br/> -----acdycGSNCYSsSDVStaqaagyklhedGETVGSN-----SYPH---KYNNEGDFDfSVSPYYAWPLsSgdvYSGSPGADRvVFNENNQLaGVIHTGasGNNFVEct--</p> <p><b>BLAST:</b> aliSize=24 (resi) iden=17.31% (18/104) simi=23.08% (24/104)<br/> vintf-----FDgVADYLQTYHKLDPDNYITK--EAQALGW-VASKGNladvapGKSIggdIFSNREGKLPg-----ksgrtwreadinytsgrnsdrilyssdwliykttdhyqtfkir<br/> -----acdycgsncysssdvstaqaagyklhedGETVGSNSYPHKYNNEGDFDfSVSPYYAWPLlSSG---DVYSGGSPGADRvVFNENNQLaGVI-Thtgasgmnfvect-----</p> <p><b>Proposed:</b> aliSize=79 (resi) RMSD=2.84 (Å)<br/> vint-----FDgVADYLqtyhKLP-DNYIT-KSEAQALGWVASKGN-ladvapgks iGGDI FSNREGKLPgkSgRTWREADIn-----YTSFRNSDRILYSSDWLI-YKTtDh-----YQTFtkir<br/> ----acdycgsNC-Y--S-----SSDvSTAQAaGYKLhedGETVG-SNs-----YPHKYNNEGDFDfSVS--SPYYAWPLsSgdvYSGSPGADRvVFNENNQLaGVI-ThtgasgmnFVEct---</p> |

|     |                                                          |   |       |                                                                                                                                                                                                                                                                                                                                                                                                                                                                                                                                                                                                                                                                                                                                                                                                                                                                                                                                                                                                                                                                                                                                                                                                                                          |
|-----|----------------------------------------------------------|---|-------|------------------------------------------------------------------------------------------------------------------------------------------------------------------------------------------------------------------------------------------------------------------------------------------------------------------------------------------------------------------------------------------------------------------------------------------------------------------------------------------------------------------------------------------------------------------------------------------------------------------------------------------------------------------------------------------------------------------------------------------------------------------------------------------------------------------------------------------------------------------------------------------------------------------------------------------------------------------------------------------------------------------------------------------------------------------------------------------------------------------------------------------------------------------------------------------------------------------------------------------|
| 555 | <p><b>lyvsA (108)</b></p> <hr/> <p><b>lmgA (97)</b></p>  | N | 22.68 | <p><b>TM-align: aliSize=63 (resi) RMSD=2.41 (Å)</b><br/> vintfdgvadylqtyhklpdnyitkseaqalgwvaskgnladvap-----GKSI--GDIIFSNRECKLPGKSGRTWREADINYT-SGFNSDRILYSSDW-LIKITDHYQTFKIR---<br/> -----vkavgrvcysalpsqahdtldlidgegPPYsqDGVVFQNRRECLPAHSTGYHYEYTVITPgSPTRGARRIITGQOQEDYIADHYASRRVdfac</p> <p><b>SARST: aliSize=69 (resi) RMSD=13.09 (Å)</b><br/> vintfdgvadylqtyhklpdnyit-----KSEAQALGWvaSKGNLAdvapgksIGDIIFSNRECKLPGKSG--RTWREADI-NYTS--frnSDRILYSSD-WLIKIDHYQTFK-----ir<br/> -----vkavgrvcysalpsqahdtLDLIDEGG--PPYSQ-----DGVVFQNRRECLPAHStGyHEYTVITpGSPTrg---ARRIITGQOQEDYIADHYASRRVdfac--</p> <p><b>BLAST: aliSize=30 (resi) iden=22.68% (22/97) simi=30.93% (30/97)</b><br/> vintfdgvadylqtyhklpdnyitkseaqalgwvaskgnladvapgksig-----GDIIFSNRECKLPGKSGRTWREADINYSIF--RNSDRILYSSDWL-IKIDHYQTFK-----r<br/> -----vkavgrvcysalpsqahdtldlidgegpfysqDGVVFQNRRECLPAHSTGYHYEYTV-ITpGSptRGARRIITGQOQEDYIADHYASRRVdfac-</p> <p><b>Proposed: aliSize=84 (resi) RMSD=2.43 (Å)</b><br/> -VINtfdgvadylqtyhklpdNYITKSeaQalgWVAS-KGN-LADVAPgKS-----iGDIIFSNRECKLPGKSGRTWREADINYT-SGFNSDRILYSSDW-LIKITDHYQTFKIR---<br/> vkAV-----GRVCYS--A---LPSQaHDTIDLIDEG-GPfpysq-DGVVFQNRRECLPAHStGYHYEYTVITPgSPTRGARRIITGQOQEDYIADHYASRRVdfac</p>                |
| 556 | <p><b>lyvsA (108)</b></p> <hr/> <p><b>lmgwA (99)</b></p> | N | 22.22 | <p><b>TM-align: aliSize=63 (resi) RMSD=2.47 (Å)</b><br/> vintfdgvadylqtyhklpdnyitkseaqalgwvaskgnladvap-----GKSI--GDIIFSNRECKLPGKSGRTWREADINYT-SGFNSDRILYSSDW-LIKITDHYQTFKIR---<br/> -----asvkavgrvcysalpsqahdtldlidgegPPYsqDGVVFQNRRECLPAHSTGYHYEYTVITPgSPTRGARRIITGQOQEDYIADHYASRRVdfac</p> <p><b>SARST: aliSize=69 (resi) RMSD=13.13 (Å)</b><br/> vintfdgvadylqtyhklpdnyit-----KSEAQALGWvaskGNLAdvapgksIGDIIFSNRECKLPGKSG--RTWREADI-NYTS--frnSDRILYSSD-WLIKIDHYQTFK-----ir<br/> -----asvkavgrvcysalpsqahdtLDLIDEGGPF--PYSQ-----DGVVFQNRRECLPAHStGyHEYTVITpGSPTrg---ARRIITGQOQEDYIADHYASRRVdfac--</p> <p><b>BLAST: aliSize=30 (resi) iden=22.22% (22/99) simi=30.30% (30/99)</b><br/> vintfdgvadylqtyhklpdnyitkseaqalgwvaskgnladvapgksig-----GDIIFSNRECKLPGKSGRTWREADINYSIF--RNSDRILYSSDWL-IKIDHYQTFK-----r<br/> -----asvkavgrvcysalpsqahdtldlidgegpfysqDGVVFQNRRECLPAHSTGYHYEYTV-ITpGSptRGARRIITGQOQEDYIADHYASRRVdfac-</p> <p><b>Proposed: aliSize=84 (resi) RMSD=2.43 (Å)</b><br/> vintfdgva-DYLqtyhklpdnYITKSeaQalgWVAS-KGN-LADVAPgKS-----iGDIIFSNRECKLPGKSGRTWREADINYT-SGFNSDRILYSSDW-LIKITDHYQTFKIR---<br/> -----aSVK---AV---GRVCYS--A---LPSQaHDTIDLIDEG-GPfpysq-DGVVFQNRRECLPAHStGYHYEYTVITPgSPTRGARRIITGQOQEDYIADHYASRRVdfac</p> |
| 557 | <p><b>lyvsA (108)</b></p> <hr/> <p><b>lpylA (96)</b></p> | N | 20.83 | <p><b>TM-align: aliSize=63 (resi) RMSD=2.34 (Å)</b><br/> vintfdgvadylqtyhklpdnyitkseaqalgwvaskgnladvap-----GKSI--GDIIFSNRECKLPGKSGRTWREADINYT-SGFNSDRILYSSDWL-IKIDHYQTFKIR---<br/> -----dpaladvcrtklpsqaqdtlaliakngPYPYnrDGVVFENRESRLPKKNGYHYEFTVVPgSNDRGTRRVVTGGYGEQWSPDHYATFOELDprc</p> <p><b>SARST: aliSize=71 (resi) RMSD=12.85 (Å)</b><br/> vintfdgvadylqtyhklpdnyit-----KSEAQALGWvaSKGNLAdvapgksIGDIIFSNRECKLPGKSG--RTWREADINyTSGFNSDRILYSSDWL-IKIDHYQTFK-----ir<br/> -----paladvcrtklpsqaqdtLALIakng--PYPYnr-----DGVVFENRESRLPKKNGyHEFTVVP-GSNDRGTRRVVTGGYGEQWSPDHYATFOELDprc--</p> <p><b>BLAST: aliSize=46 (resi) iden=34.74% (33/96) simi=48.42% (46/96)</b><br/> vintfdg--VALYLQTYhklpdnyitkSEAQALGWvaSKGNLAdvapgksIGDIIFSNRECKLPGKSGRTWREADINYSIF--RNSDRILYSSDWL-IKIDHYQTFK-----r<br/> -----paLADVCRt--KLF-----SQAQDTLALIAKNGPY---PYNR-DGVVFENRESRLPKKNGYHYEFTV-VITpSndRGTRRVVTGGYGEQWSPDHYATFOELDprc-</p> <p><b>Proposed: aliSize=82 (resi) RMSD=2.19 (Å)</b><br/> vintfdGVadylqtyhklPdNYITKSEAqALG-WVAS-KGNladv-----apgksIGDIIFSNRECKLPGKSGRTWREADINYT-SGFNSDRILYSSDWL-IKIDHYQTFKIR---<br/> -----LPA-----L-ADVCRtKL--PSQAQDTIALI--Akngpypyr-----DGVVFENRESRLPKKNGYHYEFTVVPgSNDRGTRRVVTGGYGEQWSPDHYATFOELDprc</p>            |

|     |                                                                  |   |       |                                                                                                                                                                                                                                                                                                                                                                                                                                                                                                                                                                                                                                                                                                                                                                                                                                                                                                                                                                                                                                                                                                                                                                                                                                           |
|-----|------------------------------------------------------------------|---|-------|-------------------------------------------------------------------------------------------------------------------------------------------------------------------------------------------------------------------------------------------------------------------------------------------------------------------------------------------------------------------------------------------------------------------------------------------------------------------------------------------------------------------------------------------------------------------------------------------------------------------------------------------------------------------------------------------------------------------------------------------------------------------------------------------------------------------------------------------------------------------------------------------------------------------------------------------------------------------------------------------------------------------------------------------------------------------------------------------------------------------------------------------------------------------------------------------------------------------------------------------|
| 558 | <p><b>lyvsA</b><br/>(108)</p> <hr/> <p><b>lt2iA</b><br/>(96)</p> | N | 22.92 | <p><b>TM-align:</b> aliSize=63 (resi) RMSD=2.48 (Å)<br/> vintfdgvadylqtyhklpdnyi tkseaqlgwaskgnladvap-----GKSI--GDI FSNREGKLPKSGRTWREADINYT-SGFRNSDRILYSSDW-LIKITDHYQITFKIR---<br/> -----dvsgtvclsalppeatdtlnliasdgpPPYsqDGVVFQNRRESVLPQSYGYHYEYTVITPgARTGTRRIITGEAtQEDYITGDHYATFSLIDqtc</p> <p><b>SARST:</b> aliSize=81 (resi) RMSD=18.10 (Å)<br/> vintfdgvadylqt--YHKLPDNYIT----KSEAQALGWVASKGNLADVAPGKSiGDI FSNREGKLPKSG--RTWREADINYSGFRNSDRILYSSDW-LIKITDHYQITFK-----ir<br/> -----dvSGTVCLSALPPEATDTLNLIASDGPFPYSQ-----DGVVFQNRRESVLPQSYGYHYEYTVIT-PGARTGTRRIITGEAtQEDYITGDHYATFSLIDqtc--</p> <p><b>BLAST:</b> aliSize=30 (resi) iden=23.96% (23/96) simi=31.25% (30/96)<br/> vintfdgvadylqtyhklpdnyi tkseaqlgwaskgnladvapgksig-----GDI FSNREGKLPKSGRTWREADINYSGFRN--SDRILYSSDWLI-KITDHYQITFKI-----r<br/> -----dvsgtvclsalppeatdtlnliasdgpfpysqDGVVFQNRRESVLPQSYGYHYEYTV-ITPgARTrgTRRIITGEAtQEDYITGDHYATFSLIDqtc-</p> <p><b>Proposed:</b> aliSize=84 (resi) RMSD=2.53 (Å)<br/> vIntfdgvadylqtyhklpDNYITKSeAQalGWVASKGN-LADVAPGKS-----iGDI FSNREGKLPKSG--RTWREADINYSGFRNSDRILYSSDW-LIKITDHYQITFKIR---<br/> -DV-----SGTVCLS--L---PPEATDTLNLIASD-GPfpysq-DGVVFQNRRESVLPQ-SyGYYHYEYTVITPgARTGTRRIITGEAtQEDYITGDHYATFSLIDqtc</p>           |
| 559 | <p><b>lyvsA</b><br/>(108)</p> <hr/> <p><b>luciA</b><br/>(96)</p> | N | 21.88 | <p><b>TM-align:</b> aliSize=63 (resi) RMSD=2.40 (Å)<br/> vintfdgvadylqtyhklpdnyi tkseaqlgwaskgnladvap-----GKSI--GDI FSNREGKLPKSGRTWREADINYT-SGFRNSDRILYSSDW-LIKITDHYQITFKIR---<br/> -----dtsgtvclsalppeatdtlnliasdgpPPYsqDGVVFQNRRESVLPQSYGYHYEYTVITPgARTGTRRIITGEAtQEDYITGDHYATFSLIDqtc</p> <p><b>SARST:</b> aliSize=83 (resi) RMSD=16.99 (Å)<br/> vintfdgvadylqt--YHKLPDNYITKSEAQALGWVASKGNLADVAPGKS---IGDI FSNREGKLPKSG--RTWREADINYSGFRNSDRILYSSDW-LIKITDHYQITFK-----ir<br/> -----dtSGTVCLSALPPEATDTLNLIASDGPFPYSQDGVVFQNRRESVLPQSYGYHYEYTVIT-PGARTGTRRIITGEAtQEDYITGDHYATFSLIDqtc--</p> <p><b>BLAST:</b> aliSize=30 (resi) iden=22.92% (22/96) simi=31.25% (30/96)<br/> vintfdgvadylqtyhklpdnyi tkseaqlgwaskgnladvapgksig-----GDI FSNREGKLPKSGRTWREADINYSGFRN--SDRILYS-SDWLI-KITDHYQITFKI-----r<br/> -----dtsgtvclsalppeatdtlnliasdgpfpysqDGVVFQNRRESVLPQSYGYHYEYTV-ITPgARTrgTRRIITGeATQEDYITGDHYATFSLIDqtc-</p> <p><b>Proposed:</b> aliSize=81 (resi) RMSD=2.27 (Å)<br/> vIntfdgvadylqtyhklpDNYITKSeAQalGWV-AS--KqNIADVA-----pgksigDI FSNREGKLPKSGRTWREADINYSGFRNSDRILYSSDW-LIKITDHYQITFKIR---<br/> -DI-----SGTVCLSAL---PPEATDTLN-L-IASDgpfpysq-----DGVVFQNRRESVLPQSYGYHYEYTVITPgARTGTRRIITGEAtQEDYITGDHYATFSLIDqtc</p>              |
| 560 | <p><b>lyvsA</b><br/>(108)</p> <hr/> <p><b>lucjA</b><br/>(96)</p> | N | 20.83 | <p><b>TM-align:</b> aliSize=63 (resi) RMSD=2.49 (Å)<br/> vintfdgvadylqtyhklpdnyi tkseaqlgwaskgnladvap-----GKSI--GDI FSNREGKLPKSGRTWREADINYT-SGFRNSDRILYSSDW-LIKITDHYQITFKIR---<br/> -----dvsgtvclsalppeatdtlnliasdgpPPYsqDGVVFQNRRESVLPQSYGYHYEYTVITPgARTGTRRIITGEAtQEDYITGDHYATFSLIDqtc</p> <p><b>SARST:</b> aliSize=79 (resi) RMSD=18.30 (Å)<br/> vintfdgvadylqt--YHKLPDNYIT----KSEAQALGWVASKGNLADVAPGKSiGDI FSNREGKLPKSG--RTWREADI-NYTS--GfrnSDRILYSSDW-LIKITDHYQITFK-----ir<br/> -----dvSGTVCLSALPPEATDTLNLIASDGPFPYSQ-----DGVVFQNRRESVLPQSYGYHYEYTVITPgARTGTRRIITGEAtQEDYITGDHYATFSLIDqtc--</p> <p><b>BLAST:</b> aliSize=29 (resi) iden=22.92% (22/96) simi=30.21% (29/96)<br/> vintfdgvadylqtyhklpdnyi tkseaqlgwaskgnladvapgksig-----GDI FSNREGKLPKSGRTWREADINYSGFRN--SDRILYS-SDWLI-KITDHYQITFKI-----r<br/> -----dvsgtvclsalppeatdtlnliasdgpfpysqDGVVFQNRRESVLPQSYGYHYEYTV-ITPgARTrgTRRIITGeATQEDYITGDHYATFSLIDqtc-</p> <p><b>Proposed:</b> aliSize=80 (resi) RMSD=2.13 (Å)<br/> vIntfdgvadylqtyhklpDNYITKSeAQalGWV-AS--KqNIADVAP-----gksigDI FSNREGKLPKSG--RTWREADINYSGFRNSDRILYSSDW-LIKITDHYQITFKIR---<br/> -DV-----SGTVCLSAL---PPEATDTLN-L-IASDgpfpysq-----DGVVFQNRRESVLPQ-SyGYYHYEYTVITPgARTGTRRIITGEAtQEDYITGDHYATFSLIDqtc</p> |

|     |                                             |   |       |                                                                                                                                                                                                                                                                                                                                                                                                                                                                                                                                                                                                                                                                                                                                                                                                                                                                                                                                                                                                                                                                                                                                                                                                                                                                                                                                                                                                                                                                                                                                                                                                                                                                                                                                                             |
|-----|---------------------------------------------|---|-------|-------------------------------------------------------------------------------------------------------------------------------------------------------------------------------------------------------------------------------------------------------------------------------------------------------------------------------------------------------------------------------------------------------------------------------------------------------------------------------------------------------------------------------------------------------------------------------------------------------------------------------------------------------------------------------------------------------------------------------------------------------------------------------------------------------------------------------------------------------------------------------------------------------------------------------------------------------------------------------------------------------------------------------------------------------------------------------------------------------------------------------------------------------------------------------------------------------------------------------------------------------------------------------------------------------------------------------------------------------------------------------------------------------------------------------------------------------------------------------------------------------------------------------------------------------------------------------------------------------------------------------------------------------------------------------------------------------------------------------------------------------------|
| 561 | <p>lyvsA (108)</p> <hr/> <p>luckA (96)</p>  | N | 21.88 | <p><b>TM-align:</b> aliSize=63 (resi) RMSD=2.38 (Å)<br/> vintfdgvadylqtyhklpdnyi tkseaqalgwaskgnladvap-----GKSI-GDI-SNREGKLPKSGRTWREADINYT-SGFRNSDRILYSSDW-LIKITDHYQITFKIR---<br/> -----dvsgtvclsalppeatdtlnliasdgpPPYsqDGVVFQNRSTLPTQSYGYHEYTVITPgARTGTRRIITGEATqEDYITGDHYATFSLIdqtc</p> <p><b>SARST:</b> aliSize=83 (resi) RMSD=17.06 (Å)<br/> vintfdgvadylqt--YHKLPDNYITKSEAQAQlgwaskgnLADVAPGKS---IGCDI-SNREGKLPK-S-RTWREADINYSGFRNSDRILYSSD-WLIKIKITDHYQITFK-----ir<br/> -----dvSGTVCLSAALPPEATDT-----NLIASDGPFPysQDGVVFQNRSTLPTQsYyYHEYTVIT-PGARTGTRRIITGEATQEDYITGDHYATFSLIdqtc--</p> <p><b>BLAST:</b> aliSize=30 (resi) iden=22.92% (22/96) simi=31.25% (30/96)<br/> vintfdgvadylqtyhklpdnyi tkseaqalgwaskgnladvapgksig-----GDI-SNREGKLPKSGRTWREADINYSGFRN--SDRILYS-SDWLIKIKITDHYQITFKI-----r<br/> -----dvsgtvclsalppeatdtlnliasdgpfpysqDGVVFQNRSTLPTQSYGYHEYTV-ITPgARTrgTRRIITGEATQEDYITGDHYATFSLIdqtc-</p> <p><b>Proposed:</b> aliSize=83 (resi) RMSD=2.36 (Å)<br/> vINtfdgvadylqtyhklpdNYITK-SeaQalgWVAS-KGN-LADVAPGKS-----iGCDI-SNREGKLPKSGRTWREADINYT-SGFRNSDRILYSSDW-LIKITDHYQITFKIR---<br/> -DV-----SGTVCLSA--A--LPPEaTDTINLIASD-GPfpysq-DGVVFQNRSTLPTQSYGYHEYTVITPgARTGTRRIITGEATqEDYITGDHYATFSLIdqtc</p>                                                                                                                                                                                                                                                                                                                                                                                                                                                                                                                                   |
| 562 | <p>lyvsA (108)</p> <hr/> <p>lynvX (96)</p>  | N | 21.88 | <p><b>TM-align:</b> aliSize=62 (resi) RMSD=2.48 (Å)<br/> vintfdgvadylqtyhklpdnyi tkseaqalgwaskgnladvap-----GKSI-GDI-SNREGKLPKSGRTWREADINYT-SGFRNSDRILYSSDW-LIKITDHYQITFKIR---<br/> -----dvsgtvclsalppeatdtlnliasdgpPPYsqDGVVFQNRSTLPTQSYGYHEYTVITPgARTGTRRIITGEATqEDYITGDHYATFSLIdktc</p> <p><b>SARST:</b> aliSize=71 (resi) RMSD=12.94 (Å)<br/> vintfdgvadylqtyhklpdnyi t-----KSEAQALGWVAskGNLadvapgksigGDI-SNREGKLPK-S-RTWREADINYSGFRNSDRILY-SSDWLIKIKITDHYQITFK-----ir<br/> -----dvsgtvclsalppeatdTLNLIASDGPFP--PYSQ-----DGVVFQNRSTLPTQSYyYHEYTVIT-PGARTGTRRIITGEATQEDYITGDHYATFSLIdktc--</p> <p><b>BLAST:</b> aliSize=30 (resi) iden=22.92% (22/96) simi=31.25% (30/96)<br/> vintfdgvadylqtyhklpdnyi tkseaqalgwaskgnladvapgksig-----GDI-SNREGKLPKSGRTWREADINYSGFRN--SDRILYS-SDWLIKIKITDHYQITFKI-----r<br/> -----dvsgtvclsalppeatdtlnliasdgpfpysqDGVVFQNRSTLPTQSYGYHEYTV-ITPgARTrgTRRIITGEATQEDYITGDHYATFSLIdktc-</p> <p><b>Proposed:</b> aliSize=81 (resi) RMSD=2.37 (Å)<br/> vINtfdgvadylqtyhklPDnYITKSEAQalGWVA-S-KGNladvA-----pgksiGDI-SNREGKLPKSGRTWREADINYT-SGFRNSDRILYSSDW-LIKITDHYQITFKIR---<br/> -DV-----SG-TVCLSAALP--PEATdTLNLI--ASDgpfpysq-----DGVVFQNRSTLPTQSY-GYHEYTVITPgARTGTRRIITGEATqEDYITGDHYATFSLIdktc</p>                                                                                                                                                                                                                                                                                                                                                                                                                                                                                                                            |
| 563 | <p>lz3aA (156)</p> <hr/> <p>lwkqB (155)</p> | C | 26.45 | <p><b>TM-align:</b> aliSize=111 (resi) RMSD=2.14 (Å)<br/> sevefSHEYWMRHALTLAKRAWDER-EVEVAVLHNNRVTGEGWNRPIGRHDPATAHAHIMALROGGLVMONRIIDATLYVTLEPCVNCAGAMIHSRIGRIVFGARDAKTGAAG-----K-----TGAaSLMd-VIhhpgmnhrveitegiladecaallsdffrmrreik-----<br/> -----NHEFTLKRAVTLACEGVNAGIGGPFSAVINKDGAITAEQNNVTTSNDEPTAHAEVTAIRKACKVLGALQDLCILYTSCEPCPCLGAIYWARPKAFYAAEHtdaaeagfddsfiykeIDKPAEERTIP--FYQVTLTEHLSPFQWRnfankkey-----dkpaertipfyqvtltehlsfpqa</p> <p>-----<br/> wrnfankkey</p> <p><b>SARST:</b> aliSize=136 (resi) RMSD=14.81 (Å)<br/> sevefSHEYWMRHALTLAKRAWDER-EVEVAVLHNNRVTGEGWNRPIGRHDPATAHAHIMALROGGLVMONRIIDATLYVTLEPCVNCAGAMIHSRIGRIVFGARDAKTGAAG-----SLMDVLIHHPGMnhRVEITEGILADECAALL-----sdffrmrreik<br/> -----NHEFTLKRAVTLACEGVNAGIGGPFSAVINKDGAITAEQNNVTTSNDEPTAHAEVTAIRKACKVLGALQDLCILYTSCEPCPCLGAIYWARPKAFYAAEHtdAAEAGfddsfiykeIDKPAEERTIP--FYQVTLTEHLSPFQWRnfankkey-----</p> <p><b>BLAST:</b> aliSize=61 (resi) iden=27.10% (42/155) simi=39.35% (61/155)<br/> sevefSHEYWMRHALTLAKRAWDER-EVEVAVLHNNRVTGEGWNRPIGRHDPATAHAHIMALROGGLVMONRIIDATLYVTLEPCVNCAGAMIHSRIGRIVFGARDAKTGAAG-----sldvllhpgmnhrveitegiladecaall<br/> -----NHEFTLKRAVTLACEGVNAGIGGPFSAVINKDGAITAEQNNVTTSNDEPTAHAEVTAIRKACKVLGALQDLCILYTSCEPCPCLGAIYWARPKAFYAAEHtdAAEAGfddsfiykeidkpaertipfyqvtltehlsfpqawrnfankkey-----</p> <p>sdffrmrreik<br/> -----</p> <p><b>Proposed:</b> aliSize=134 (resi) RMSD=1.70 (Å)<br/> sevefSHEYWMRHALTLAKRAWDER-EVEVAVLHNNRVTGEGWNRPIGRHDPATAHAHIMALROGGLVMONRIIDATLYVTLEPCVNCAGAMIHSRIGRIVFGARDAKTGAAG-----ktgaagslmdV--LHhPeMNHrVEITEGILADECAALLSDFRMR--qeik<br/> -----NHEFTLKRAVTLACEGVNAGIGGPFSAVINKDGAITAEQNNVTTSNDEPTAHAEVTAIRKACKVLGALQDLCILYTSCEPCPCLGAIYWARPKAFYAAEHtdaaeagfddsfiyke-----IdkPAE-E-RTIPFYQVTLTEHLSPFQAWRN--ANKKey----</p> |

|     |                                                                   |   |       |                                                                                                                                                                                                                                                                                                                                                                                                                                                                                                                                                                                                                                                                                                                                                                                                                                                                                                                                                                                                                                                                                                                                                                                                                                                                                                                                                                                                                                                                                                                                                                                                                                                                                                                                                                                                                                                                                                                                                                    |
|-----|-------------------------------------------------------------------|---|-------|--------------------------------------------------------------------------------------------------------------------------------------------------------------------------------------------------------------------------------------------------------------------------------------------------------------------------------------------------------------------------------------------------------------------------------------------------------------------------------------------------------------------------------------------------------------------------------------------------------------------------------------------------------------------------------------------------------------------------------------------------------------------------------------------------------------------------------------------------------------------------------------------------------------------------------------------------------------------------------------------------------------------------------------------------------------------------------------------------------------------------------------------------------------------------------------------------------------------------------------------------------------------------------------------------------------------------------------------------------------------------------------------------------------------------------------------------------------------------------------------------------------------------------------------------------------------------------------------------------------------------------------------------------------------------------------------------------------------------------------------------------------------------------------------------------------------------------------------------------------------------------------------------------------------------------------------------------------------|
| 564 | <p><b>1z4rA</b><br/>(163)</p> <hr/> <p><b>1qsmD</b><br/>(152)</p> | C | 14.47 | <p><b>TM-align:</b> aliSize=130 (resi) RMSD=3.20 (Å)<br/> s--GI EFHVI Gns ltpkanr RVLLWLVG IONVFS HQ LPRMPKEY--IARLVDP----K-HKTLALIK--DGRVIGGICRMFP---TOGFTFVFCATTSNEOVKGYTHMNLKEYHIHNILYFLTYADH-Y--IGYFKOGFSKDIKvpksry--LgyikDYEgatlmecelnpr--<br/> --sedNITVRFVT-----E-NDKEGWQRWKSQYD-FYEV SFPdLDDFN-GRfldpnIkMWA AVAVEssSEKIIGMNFNHMtwdFKDKIYNLDYDENSRVKGAGKIQFVYDEADLGTSPSVYWCTDhSnhRQQLLYVNVGYKAPK-----iIY----KRR-----gy</p> <p><b>SARST:</b> aliSize=110 (resi) RMSD=4.14 (Å)<br/> sgie fhvignsltpkanrr-----VLLLVGLONVFSHQLPRM-----KEYIARLVFDPK--HKTALALIK--DGRVIGGICRMFP--OGF---TEVFCATTSNEOVKGYTHMNLKEYHIHNILYFLTYADH-YAIGYFKO-----gfskdikvpksrylgvik<br/> -----sednitvrfvtendKEGQRLWKSQYDFYEVSFddIDDFNFRFLDNIkMWA AVAVEssSEKIIGMNFNHMtwdFKdkIYNLDYDENSRVKGAGKIQFVYDEADLGTSPSVYWCTDhSNHRAQLLYvkvgykpkilyrkyg-----</p> <p><b>dyc</b>gatlmecelnpr<br/> -----</p> <p><b>BLAST:</b> aliSize=17 (resi) iden=6.58% (10/152) simi=11.18% (17/152)<br/> sgie fhvignsltpkanrrvllwlvglqnvfshqlprmpkeyiarlvfdpkhktlalikdgrviggicrfmftqgfteivfcav-----TTSNEOVKGYgTHLMNLKEYHIHNILYFLTYADH-----<br/> -----sednitvrfvtendkegwqrlwksyqdfyevsfddlddfnfrfldpnikmwaavaveSSSEKIIGMNFNHTTDFDKIYNLDYDENSRVKGAGK-----</p> <p>-----yaigyfkkqgfskdikvpksrylgvikdycgatlmecelnpr<br/> liqfvdeadklgtpsvywctdesnhraqllykvgykpkilyrkyg-----</p> <p><b>Proposed:</b> aliSize=129 (resi) RMSD=2.19 (Å)<br/> sg---IEFHVI Gns ltpkanrrVLLWLVIIONVFSHQLPRM-----YIARLVFD--P--K-HKTLALIK--DGRVIGGICRMFP--TO----GFTEVFCATTSNEOVKGYTHMNLKEYHIHNILYFLTYADH-Y--IGYFKOGFSKDIKvpksrylvikdvEGATMECEL--npra<br/> --sedNITVRFV-----TENDKEWQRLWKSQYDFYEV SFPdLDDFNFRFLDpnlkMWA AVAVEssSEKIIGMNFNHT--MTwdfkDKIYNLDYDENSRVKGAGKIQFVYDEADLGTSPSVYWCTDhSnhRQQLLYVNVGYK-----APKIYKRGYg-----</p>                                                                                                                                                                                                                |
| 565 | <p><b>1znpA</b><br/>(140)</p> <hr/> <p><b>1ep0A</b><br/>(183)</p> | N | 10.71 | <p><b>TM-align:</b> aliSize=99 (resi) RMSD=2.19 (Å)<br/> dsaqaiirelglephpeggyfhqfrdkaggers-----HSTAIYYLLEKGVRSWHVRVT--DAVEVWHYYAgAPIALHLSOD-----GRVOTFTGPAIlegEPPOVIVPANCWOSAESLGFDTLNGCTVSPGFAFSSFVAE--GWSFG<br/> -----efrfiktsldgaiiepevytderyfmetfneai foenglevrfVQDNESMSVRGLRGLFQREkPQGLVVRVIR-GEFDVAVDLrknsdtYGTWGVRS--DENRR--EFFIEGFAHGFLALSDECIINYKCTELYHPEYDSGIWDDDD</p> <p>-----<br/> igidwplemvdlliisekdrnwklrenpvyll</p> <p><b>SARST:</b> aliSize=118 (resi) RMSD=10.34 (Å)<br/> dsaqaiirelg-----LEPHPEGIFYHOTFRDKAGGERGHST-----AIYYLLEKGVRSWHVRVT--AVEVWHYYAgAPIALHLS-----ODGRVOTFTGPAIlegEPPOVIVPANCWOSAESLGFDTLNGCTVSPGFAFSSFVAE-----<br/> -----efrfiktsldgaiiepevytderyfmetfneai foenglevrfVQDNESMSVRGLRGLFQREkPQGLVVRVIR-GEFDVAVDLrknsDTYGTWGVRS--DENRR--EFFIEGFAHGFLALSDECIINYKCTELYHPEYDSGIWDDDPdigidwplemvdlliisekdrnwklrenp</p> <p>-----gwsfg<br/> lrenpvyll-----</p> <p><b>BLAST:</b> aliSize=19 (resi) iden=7.97% (11/140) simi=13.77% (19/140)<br/> dsaqaiirelg-----OAI RLEGL EPHpeggyfhqfrdkaggersHSTAIYYLLEK-----<br/> -----efrfiktsldgaiiepevytderyfmetfneai foenglevrfVQDNESMSVRGLRGLFQREkPQGLVVRVIR-GEFDVAVDLrknsdtYGTWGVRS--DENRR--EFFIEGFAHGFLALSDECIINYKCTELYHPEYDSGIWDDDPdigidwplemvdlliisekdrnwklrenp</p> <p>---gvrshwhrvtdavevwhyyagapialhlsqdgrevqftlgpailegerpqvivpancwqsaeslgdftlvgtvspgfafssfvaepgwsfg<br/> vyl</p> <p><b>Proposed:</b> aliSize=116 (resi) RMSD=2.22 (Å)<br/> dsaqaiirelg-----ELGLEPHPEGIFYHOTFRDKAGGERGHST-----AIYYLLEKGVRSWHVRVT--DAVEVWHYYAgAPIALHLSOD-----GRVOTFTGPAIlegEPPOVIVPANCWOSAESLGFDTLNGCTVSPGFAFSSFVAE--GWSFG-----<br/> -----efrfiktsldgaiiepevytderyfmetfneai foenglevrfVQDNESMSVRGLRGLFQREkPQGLVVRVIR-GEFDVAVDLrknsdtYGTWGVRS--DENRR--EFFIEGFAHGFLALSDECIINYKCTELYHPEYDSGIWDDDPdigidwplemvdlliisekdrnwklrenpvyll</p> <p>-----<br/> sekdrnwklrenpvyll</p>                                                                                                                                     |
| 566 | <p><b>1znpA</b><br/>(140)</p> <hr/> <p><b>1pm7A</b><br/>(199)</p> | N | 8.57  | <p><b>TM-align:</b> aliSize=100 (resi) RMSD=2.28 (Å)<br/> dsaqaiirelglephpeggyfhqfrdkaggers-----GHSTAIYYLLEKGVRSWHVRVT--DAVEVWHYYAgAPIALHLSOD-----GRVOTFTGPAIlegEPPOVIVPANCWOSAESLGFDTLNGCTVSPGFAFSSFVAE--AEPGWS-<br/> -----mkareldvpgaweitptihvdsrglffewltdhgfracfaghsLDVRQVNCSSVSSAGVLRGLFAQlppSOAKYVTCVS-GSVFDVVVDIregspTFGRWDSVLDQD--RRTIYSEGLAHGFLAQNSTMYLCSAEYNPQREHTICATDPT</p> <p>PG-----<br/> LAvdwlvdgaapslsdrdaaapsfedvrasgllprweqtqrfigem</p> <p><b>SARST:</b> aliSize=108 (resi) RMSD=14.84 (Å)<br/> dsaqaiirelg-----LEPHPEGIFYHOTFRDKA-----KAGGERGHSTAIYYLLEKGVRSWHVRVT--DAVEVWHYYAgAPIALHLS-----ODGRVOTFTGPAILE-----EPPOVIVPANCWOSAESLGFDTLNGCTV-----<br/> -----mkareldvpgaweitptihvdsrglffewltdhgfracfaghsLDVRQVNCSSVSSAGVLRGLFAQlppSOAKYVTCVS-GSVFDVVVDIregspTFGRWDSVLDQD--RRTIYSEGLAHGFLAQNSTMYLCSAEYNPQREHTICatdptlavdwlvdgaapslsdrdaaapsfed</p> <p>-----vspgfafssfvaepgwsfg<br/> vrasgllprweqtqrfigem-----</p> <p><b>BLAST:</b> aliSize=23 (resi) iden=10.14% (14/140) simi=16.67% (23/140)<br/> dsaqaiirelglephpeggyfhqfrdkaggersghs-----HSTAIYYLLEKGVRSWHVRVT--DAVEVWHYYAgAPIALHLSOD-----GRVOTFTGPAILE-----EPPOVIVPANCWOSAESLGFDTLNGCTV-----<br/> -----mkareldvpgaweitptihvdsrglffewltdhgfracfaghsLDVRQVNCSSVSSAGVLRGLFAQlppSOAKYVTCVS-GSVFDVVVDIregspTFGRWDSVLDQD--RRTIYSEGLAHGFLAQNSTMYLCSAEYNPQREHTICatdptlavdwlvdgaapslsdrdaaapsfed</p> <p>-----erpqvivanpwqsaeslgdftlvgtvspgfafssfvaepgwsfg<br/> ticatdptlavdwlvdgaapslsdrdaaapsfedvrasgllprweqtqrfigem-----</p> <p><b>Proposed:</b> aliSize=118 (resi) RMSD=2.23 (Å)<br/> dsaqaiirelg-----LEPHPEGIFYHOTFRDKA-----gERG-----HSTAIYYLLEKGVRSWHVRVT--DAVEVWHYYAgAPIALHLSOD-----GRVOTFTGPAIlegEPPOVIVPANCWOSAESLGFDTLNGCTVSPGFAFSSFVAE--AEPGWSFG-----<br/> -----mkareldvpgaweitptihvdsrglffewltdhgfracfaghsLDVRQVNCSSVSSAGVLRGLFAQlppSOAKYVTCVS-GSVFDVVVDIregspTFGRWDSVLDQD--RRTIYSEGLAHGFLAQNSTMYLCSAEYNPQREHTICATDPTlavdwlvdgaapsls</p> <p>-----<br/> drdaaapsfedvrasgllprweqtqrfigem</p> |

|     |                                       |   |      |                                                                                                                                                                                                                                                                                                                                                                                                                                                                                                                                                                                                                                                                                                                                                                                                                                                                                                                                                                                                                                                                                                                                                                                                                                                                                                                                                                                                                                                                                                                                                                                                                                                                                                                                                                                                                                                                                                                                             |
|-----|---------------------------------------|---|------|---------------------------------------------------------------------------------------------------------------------------------------------------------------------------------------------------------------------------------------------------------------------------------------------------------------------------------------------------------------------------------------------------------------------------------------------------------------------------------------------------------------------------------------------------------------------------------------------------------------------------------------------------------------------------------------------------------------------------------------------------------------------------------------------------------------------------------------------------------------------------------------------------------------------------------------------------------------------------------------------------------------------------------------------------------------------------------------------------------------------------------------------------------------------------------------------------------------------------------------------------------------------------------------------------------------------------------------------------------------------------------------------------------------------------------------------------------------------------------------------------------------------------------------------------------------------------------------------------------------------------------------------------------------------------------------------------------------------------------------------------------------------------------------------------------------------------------------------------------------------------------------------------------------------------------------------|
| 567 | <p>1znpA (140)</p> <p>2ixcA (198)</p> | N | 8.57 | <p><b>TM-align:</b> aliSize=100 (resi) RMSD=2.25 (Å)<br/> dsaqaiirelglephpeggyfhtfrdkagger-----GHSTAIYYLLEKGVRSWHRVTD--DAVEVWHYYAgAPIALHLSOD-----GREVOTFTLGPAILegEPpVIVPANCWOSAESLGDFTLVGCTVSPGFVAFSSFVAEPGWS-<br/> -----mkareldvpgaweiipthvdsrglffewltdhgfrafaghsLDVRQVNCSSAGVLRGLIFAQlppSQAKYVTCVSGSVFDVVVDIregspTFGRWDSVLDQD---RRTIYSEGLAHGFLAQNSTMYLCAEYNPQREHTICATDPT</p> <p>PG-----<br/> LAvdwpdvdaapslsdrdaaapsfedvrasgllprweqtqrfige</p> <p><b>SARST:</b> aliSize=112 (resi) RMSD=10.31 (Å)<br/> ds-----AOALIRELGLPEHPeggyfhtfrdkaggerghsTAIYYLLEKGVRSWHRVTD--DAVEVWHYYAgAPIALHLSOD-----ODGREVOTFTLGPAILegEPpVIVPANCWOSAESLGDFTLVGCTVSPGFVAFSSFVAEP-----WS-<br/> -----mkareldvpgaweiipthvdsrglffewltdhgfrafaghsLD-----VRQ-----VNCSSAGVLRGLIFAQlppSQAKYVTCVSGSVFDVVVDIregspTFGRWDSVLDQD---DRRTIYSEGLAHGFLAQNSTMYLCAEYNPQREHTICATDPTlavdwpdvAA</p> <p>-----g<br/> slsdrdaaapsfedvrasgllprweqtqrfige-</p> <p><b>BLAST:</b> aliSize=23 (resi) iden=10.14% (14/140) simi=16.67% (23/140)<br/> dsaqaiirelglephpeggyfhtfrdkaggerghs-----TAIYYLLEKGVRSWHRVTD--DAVEVWHYYAgAPIALHLSODGREVOTFTLGPAILegEPpVIVPANCWOSAESLGDFTLVGCTVSPGFVAFSSFVAEP-----WS-<br/> -----mkareldvpgaweiipthvdsrglffewltdhgfrafaghsLD-----H-SLDVROVNCSSAGVLRGLIFAQlppSQAKYVTCVSGSVFDVVVDIregspTFGRWDSVLDQD---DRRTIYSEGLAHGFLAQNSTMYLCAEYNPQREHTICATDPTlavdwpdvAA</p> <p>-----erpqvivpancwsaeslgdftlvgtvsgpfafssfvaepgwsppg<br/> ticatdptlavdwpdvdaapslsdrdaaapsfedvrasgllprweqtqrfige-----</p> <p><b>Proposed:</b> aliSize=118 (resi) RMSD=2.21 (Å)<br/> dmsaqa-----LR-----LIR-----elglephpeggyfhtfrdkaggerghsTAIYYLLEKGVRSWHRVTD--DAVEVWHYYAgAPIALHLSOD-----GREVOTFTLGPAILegEPpVIVPANCWOSAESLGDFTLVGCTVSPGFVAFSSFVAEPGWS-<br/> -----mkareldvpgaweiipthvdsrglffewltdhgfrafaghsLD-----VRQ-----VNCSSAGVLRGLIFAQlppSQAKYVTCVSGSVFDVVVDIregspTFGRWDSVLDQD---DRRTIYSEGLAHGFLAQNSTMYLCAEYNPQREHTICATDPTlavdwpdvdaapsls</p> <p>-----g<br/> drdaaapsfedvrasgllprweqtqrfige</p> |
| 568 | <p>1znpA (140)</p> <p>2ixhA (184)</p> | N | 6.43 | <p><b>TM-align:</b> aliSize=100 (resi) RMSD=2.43 (Å)<br/> dsaqaiirelglephpeggyfhtfrdkagger-----GHSTAIYYLLEKGVRSWHRVTD--DAVEVWHYYAgAPIALHLSOD-----GREVOTFTLGPAILegEPpVIVPANCWOSAESLGDFTLVGCTVSPGFVAFSSFVAEPGWS-<br/> -----smamkatrlaipdvilfeprvfgddrgffesynqrafecaghpvsfvQDNHSRSARGVLRGLIFAQlppSQAKYVTCVSGSVFDVVVDIregspTFGRWDSVLDQD---DRRTIYSEGLAHGFLAQNSTMYLCAEYNPQREHTICATDPTlavdwpdvdaapsls</p> <p>--P-----G-----<br/> pelkidwplqdapllsekdrqgkafadacfp</p> <p><b>SARST:</b> aliSize=105 (resi) RMSD=16.14 (Å)<br/> ds-----AOALIRELGLPEHPeggyfhtfrdkaggerghsTAIYYLLEKGVRSWHRVTD--DAVEVWHYYAgAPIALHLSOD-----GREVOTFTLGPAILegEPpVIVPANCWOSAESLGDFTLVGCTVSPGFVAFSSFVAEP-----WS-<br/> -----smamkatrlaipdvilfeprvfgddrgffesynqrafecaghpvsfvQDNHSRSARGVLRGLIFAQlppSQAKYVTCVSGSVFDVVVDIregspTFGRWDSVLDQD---DRRTIYSEGLAHGFLAQNSTMYLCAEYNPQREHTICATDPTlavdwpdvdaapsls</p> <p>-----gwsppg<br/> dapllsekdrqgkafadacfp-----</p> <p><b>BLAST:</b> aliSize=14 (resi) iden=6.52% (9/140) simi=10.14% (14/140)<br/> dsaqaiirelglephpeggyfhtfrdkaggerghsTAIYYLLEKGVRSWHRVTD--DAVEVWHYYAgAPIALHLSOD-----GREVOTFTLGPAILegEPpVIVPANCWOSAESLGDFTLVGCTVSPGFVAFSSFVAEP-----WS-<br/> -----smamkatrlaipdvilfeprvfgddrgffesynqrafecaghpvsfvQDNHSRSARGVLRGLIFAQlppSQAKYVTCVSGSVFDVVVDIregspTFGRWDSVLDQD---DRRTIYSEGLAHGFLAQNSTMYLCAEYNPQREHTICATDPTlavdwpdvdaapsls</p> <p>-----staiyyllekgvrshwhrvtdavevwhyagapialhlsqdgrevqftlgpaillegerpqiivpancwsaeslgdftlvgtvsgpfafssfvaepgwsppg<br/> dadacfp-----</p> <p><b>Proposed:</b> aliSize=117 (resi) RMSD=2.24 (Å)<br/> dmsaqa-----LR-----LIR-----elglephpeggyfhtfrdkaggerghsTAIYYLLEKGVRSWHRVTD--DAVEVWHYYAgAPIALHLSOD-----GREVOTFTLGPAILegEPpVIVPANCWOSAESLGDFTLVGCTVSPGFVAFSSFVAEP-----WS-<br/> -----smamkatrlaipdvilfeprvfgddrgffesynqrafecaghpvsfvQDNHSRSARGVLRGLIFAQlppSQAKYVTCVSGSVFDVVVDIregspTFGRWDSVLDQD---DRRTIYSEGLAHGFLAQNSTMYLCAEYNPQREHTICATDPTlavdwpdvdaapsls</p> <p>-----g<br/> sekdrqgkafadacfp</p>   |
| 569 | <p>1znpA (140)</p> <p>2paeb (134)</p> | N | 7.46 | <p><b>TM-align:</b> aliSize=96 (resi) RMSD=3.00 (Å)<br/> dsaqaiirelglephpeggyfhtfrdkagger-----GHSTAIYYLLEKGVRSWHRVTD--DAVEVWHYYAgAPIALHLSOD-----GREVOTFTLGPAILegEPpVIVPANCWOSAESLGDFTLVGCTVSPGFVAFSSFVAEPGWS-<br/> -----enkvinfkkiidsrgslvAieenknipfsIKRVYIIFdTKGEEPRGFNAHKKLEQLVCLNG-SCRVIDDGNITIEITLDSP-----AVGLYGPVAVHEMHDFSSDCVMVLAASDYDETDYIRQYDNFK-kyiakinl</p> <p><b>SARST:</b> aliSize=100 (resi) RMSD=8.88 (Å)<br/> dsaqaiirelglephpeggyfhtfrdkaggerghsTAIYYLLEKGVRSWHRVTD--DAVEVWHYYAgAPIALHLSOD-----GREVOTFTLGPAILegEPpVIVPANCWOSAESLGDFTLVGCTVSPGFVAFSSFVAEP-----WS-<br/> -----enkvinfkkiidsrgslvAieenknipfsIKRVYIIFdTKGEEPRGFNAHKKLEQLVCLNG-SCRVIDDGNITIEITLDSP-----AVGLYGPVAVHEMHDFSSDCVMVLAASDYDETDYIRQYDNFK-kyiakinl</p> <p><b>BLAST:</b> aliSize=9 (resi) iden=5.22% (7/134) simi=6.72% (9/134)<br/> dsaqaiirelglephpeggyfhtfrdkaggerghsTAIYYLLEKGVRSWHRVTD--DAVEVWHYYAgAPIALHLSOD-----GREVOTFTLGPAILegEPpVIVPANCWOSAESLGDFTLVGCTVSPGFVAFSSFVAEP-----WS-<br/> -----enkvinfkkiidsrgslvAieenknipfsIKRVYIIFdTKGEEPRGFNAHKKLEQLVCLNG-SCRVIDDGNITIEITLDSP-----AVGLYGPVAVHEMHDFSSDCVMVLAASDYDETDYIRQYDNFK-kyiakinl</p> <p>-----legerpqiivpancwsaeslgdftlvgtvsgpfafssfvaepgwsppg<br/> tdyirqydnfkkyiakinl-----</p> <p><b>Proposed:</b> aliSize=107 (resi) RMSD=2.23 (Å)<br/> dmsaqa-----LR-----LIR-----elglephpeggyfhtfrdkaggerghsTAIYYLLEKGVRSWHRVTD--DAVEVWHYYAgAPIALHLSOD-----GREVOTFTLGPAILegEPpVIVPANCWOSAESLGDFTLVGCTVSPGFVAFSSFVAEP-----WS-<br/> -----enkvinfkkiidsrgslvAieenknipfsIKRVYIIFdTKGEEPRGFNAHKKLEQLVCLNG-SCRVIDDGNITIEITLDSP-----AVGLYGPVAVHEMHDFSSDCVMVLAASDYDETDYIRQYDNFK-kyiakinl</p>                                                                                                                                                                                                                                                                                                                        |

|     |                                                           |   |       |                                                                                                                                                                                                                                                                                                                                                                                                                                                                                                                                                                                                                                                                                                                                                                                                                                                                                                                                                                                                                                                                                                                                                                                                                                                                                                                                                                                                                                                                                                                                                                                                                                                                                              |
|-----|-----------------------------------------------------------|---|-------|----------------------------------------------------------------------------------------------------------------------------------------------------------------------------------------------------------------------------------------------------------------------------------------------------------------------------------------------------------------------------------------------------------------------------------------------------------------------------------------------------------------------------------------------------------------------------------------------------------------------------------------------------------------------------------------------------------------------------------------------------------------------------------------------------------------------------------------------------------------------------------------------------------------------------------------------------------------------------------------------------------------------------------------------------------------------------------------------------------------------------------------------------------------------------------------------------------------------------------------------------------------------------------------------------------------------------------------------------------------------------------------------------------------------------------------------------------------------------------------------------------------------------------------------------------------------------------------------------------------------------------------------------------------------------------------------|
| 570 | <p><b>1zvnA (99)</b></p> <hr/> <p><b>2h7wA (108)</b></p>  | N | 7.07  | <p><b>TM-align:</b> aliSize=77 (resi) RMSD=3.65 (Å)<br/>       sgw----VWNOFFVLEEyTtdPlyVGKlHsdmDrgdGSI-KYILSGEG--AGI-----VFTIDDT-----TGDTHAIQRLDReerSOYTLRAQALdrtr-GRpme----PESEFI IKIQD-<br/>       ---hkvtkAHNGATLTVA--VGE--EVEIQLP--N---PTTgFAWYFEG-gtKESpnesmfTVENKYFppdskllgaggTEHFHVTVKAAAG---THAVNLT YMR----pWT---gpshDSERFIVYLKAn</p> <p><b>SARST:</b> aliSize=60 (resi) RMSD=9.00 (Å)<br/>       sgwvffvleey-----TGDPLLYVGLHSDmDRgdgsikYILSGEGAgivftiddttgdihAIQRLDREerSOYTLRAQALDRRtGRPMEPESFI IKI-----qd<br/>       -----hkvtkahngatltvAVGELVEIQLPNSPT-T-----FAWYFEG-----TKESPNES--MFTVENKYFPPDS-KLLGAGGTTEHFHVTVkaagthavnltymrpwtgpshdserfi vylkan--</p> <p><b>BLAST:</b> aliSize=11 (resi) iden=7.07% (7/99) simi=11.11% (11/99)<br/>       sgwvffvleeytgdtdplyvgklhdsmdrg-----DGSIKYILSGEGVFTIDDT-----dihaiqrldreersqytlraqaldrtrgrmpesefiikiqd<br/>       -----hkvtkahngatltvAVGELVEIQLPNSPT-Tfawyfeegtkespnesmf tvenkyfppdskllgaggtehfhvtvkaagthavnltymrpwtgpshdserfi vylkan-----</p> <p><b>Proposed:</b> aliSize=79 (resi) RMSD=3.18 (Å)<br/>       SGWV---WNOFFVLEEyTtdPlyVGKlHsdmDRgdGS--IKYILS-----geGAGI--VFTIDDT-----TGDTHAIQRLDReeRsQYTLRAQALD-rrtGR--mPESEFI IKIQD<br/>       HKVTkAHNGATLTVA--VGE--EVEIQLP--SN--PTTgFAWYFEGgtke--SPNEsmFTVENKYfppdskllgaggTEHFHVTVKAA---G-THAVNLT YMRp---WTgsh-DSERFIVYLKAN</p>                                                                                                                                                                                                                                                                                                                                                     |
| 571 | <p><b>2b3jA (151)</b></p> <hr/> <p><b>1wkqA (158)</b></p> | C | 29.80 | <p><b>TM-align:</b> aliSize=112 (resi) RMSD=2.22 (Å)<br/>       m--TNDIYMTLATEEKKAAQ-LGEVIGAIITKIDEVIARAHLREILOOPTAHAEHIATERNAKVLGSRWEGTITLYVTLEPCVMCACTIVMSRIPRIVYGADDP--K----GGCsgSLMn-Llaasnfhrai vdkvkeacstllttffknlran-----<br/>       -hamNHETLKRNVTLCEGVNAGIGGPFGAVIVKGAIAEGONNVTISNDPTAHAEVTVIRKACKVLGAYQDDIILYTSCEPCPCLGAIYWARPKAFYAAEHtdaaeagfddsfiykeidkpaertipfyqvtlteh spfqawrn</p> <p>fankkey</p> <p><b>SARST:</b> aliSize=99 (resi) RMSD=0.97 (Å)<br/>       mtndiyf-----MTLATEEKKAAQ-LGEVIGAIITKIDEVIARAHLREILOOPTAHAEHIATERNAKVLGSRWEGTITLYVTLEPCVMCACTIVMSRIPRIVYGADDP-----kkgcsgslmnlqqsnfhraivdkg<br/>       ---hamNHETLKRNVTLCEGVNAGIGGPFGAVIVKGAIAEGONNVTISNDPTAHAEVTVIRKACKVLGAYQDDIILYTSCEPCPCLGAIYWARPKAFYAAEHtdaaeagfddsfiykeidkpaertipfyqvtlteh spfqawrnfankkey-----</p> <p>v keacstllttffknlran</p> <p><b>BLAST:</b> aliSize=56 (resi) iden=29.14% (44/151) simi=37.09% (56/151)<br/>       mtndiyf-----MTLATEEKKAAQ-LGEVIGAIITKIDEVIARAHLREILOOPTAHAEHIATERNAKVLGSRWEGTITLYVTLEPCVMCACTIVMSRIPRIVYGADDP-----kkgcsgslmnlqqsnfhr<br/>       ---hamNHETLKRNVTLCEGVNAGIGGPFGAVIVKGAIAEGONNVTISNDPTAHAEVTVIRKACKVLGAYQDDIILYTSCEPCPCLGAIYWARPKAFYAAEHtdaaeagfddsfiykeidkpaertipfyqvtlteh spfqawrnfankkey-----</p> <p>aivdkgv keacstllttffknlran</p> <p><b>Proposed:</b> aliSize=136 (resi) RMSD=1.84 (Å)<br/>       m--TNDIYMTLATEEKKAAQ-LGEVIGAIITKIDEVIARAHLREILOOPTAHAEHIATERNAKVLGSRWEGTITLYVTLEPCVMCACTIVMSRIPRIVYGADDP-----kkgcsgslm--NlOOSnFnHRAIVDKGVLKEACSTLLTTFKnlR--an<br/>       -hamNHETLKRNVTLCEGVNAGIGGPFGAVIVKGAIAEGONNVTISNDPTAHAEVTVIRKACKVLGAYQDDIILYTSCEPCPCLGAIYWARPKAFYAAEHtdaaeagfddsfiyke-----IdkP-AEER-T-IPFYQVTLTEHLSPFQAWRN--AKKkey--</p> |
| 572 | <p><b>2bswA (145)</b></p> <hr/> <p><b>1vkcA (149)</b></p> | C | 13.79 | <p><b>TM-align:</b> aliSize=129 (resi) RMSD=2.37 (Å)<br/>       -IEVKPIN--AEDTYELRHRILRP-----N--QPIEAC--FESDLLRGAFHLGGYYGG-KLISIASFHQAEHSEIQGQYQYQLRG-ATLEGYREQAGSSIKHAEELRKRGDLLWCNART-S--SGYKKLGFSEQGEVFDTP-pvgphilykrit-<br/>       eYTIVDGEeyIEIKKLDREISYSfvrfpisYeeYEErHeelFESLLSQGEHKFFVALNERSLGHVWICITLDTV-DYVIAIYIDIEVVKWARGLIGSALLRKAEEWAKERGAKKIVLVEIdnPAVKWEEERYKARALIMEKP-----i</p> <p><b>SARST:</b> aliSize=126 (resi) RMSD=4.23 (Å)<br/>       ie-VKPINAEEDTYELRHRIL-----RNQPIEA-----CFESDLLRGAFHLGGYY-GGKLISIASFHQAEHSE--LQgqKQQLRGATLEGYREQAGSSIKHAEELRKRGDLLWCNART--S--SGYKKLGFSEQGEVFDTP-pvgphilykrit<br/>       --eYTIVDGEeyIEIKKLDREISYSfvrfpisYeeYEErHeelFESLLSQGEHKFFVALNERSLGHVWICITLDTVdyVK--IAIYIDIEVVKWARGLIGSALLRKAEEWAKERGAKKIVLVEIdnPAVKWEEERYKARALIMEKPi-----</p> <p><b>BLAST:</b> aliSize=58 (resi) iden=21.83% (31/145) simi=40.85% (58/145)<br/>       ievk-----PINAEDTYELRHRILRP-----RNQPIEA-----CFESDLLRGAFHLGGYY-GGKLISIASFHQAEHSELQgqKQQLRGATLEGYREQAGSSIKHAEELRKRGD--LWCNARTS--SGYKKLGFSEQGEVFDTP-pvgphilykrit<br/>       ----eytivdgeeieeikkl dreisysfvrfpisYeeYEErHeelFESLLSQGEHKFFVALNERSLGHVWICITLDTVdyVKI--IAIYIDIEVVKWARGLIGSALLRKAEEWAKERGAKKIVLVEIdnPAVKWEEERYKARALIMEKPi-----</p> <p><b>Proposed:</b> aliSize=132 (resi) RMSD=1.95 (Å)<br/>       -IEVKPIN--AEDTYELRHRILRP-----N--QPIEAC--MFESDLLRGAFHLGGYYGG-KLISIASFHQAEHSEIQGQYQYQLRGMATLEGYREQAGSSIKHAEELRKRGDLLWCNART-S--SGYKKLGFSEQGEVfdtppvgphilykrit-<br/>       eYTIVDGEeyIEIKKLDREISYSfvrfpisYeeYEErHeelFESLLSQGEHKFFVALNERSLGHVWICITLDTV-DYVIAIYIDIEVVKWARGLIGSALLRKAEEWAKERGAKKIVLVEIdnPAVKWEEERYKARALIMEKPi-----</p>                                                             |

|     |             |   |       |                                                                                                                                                                                                                                                                                                                                                                                                                                                                                                                                                                                                                                                                                                                                                                                                                                                                                                                                                             |
|-----|-------------|---|-------|-------------------------------------------------------------------------------------------------------------------------------------------------------------------------------------------------------------------------------------------------------------------------------------------------------------------------------------------------------------------------------------------------------------------------------------------------------------------------------------------------------------------------------------------------------------------------------------------------------------------------------------------------------------------------------------------------------------------------------------------------------------------------------------------------------------------------------------------------------------------------------------------------------------------------------------------------------------|
| 573 | 2bswA (145) | C | 14.48 | <p><b>TM-align:</b> aliSize=128 (resi) RMSD=2.60 (Å)<br/>           --EVKPIA--ED-TYELRHRIRRNQIEAC--FE--SD-LLRGAFHLGGYYGKLSIASFHQAEHS-E-LOGQKQYQIRG-ATLEGYREQKAGSSLTKHAEELRKRKADLLWCNART-S--ASGYKKLGFSQGEVFDTPpvvghilykrit----</p> <p><b>SARST:</b> aliSize=125 (resi) RMSD=4.28 (Å)<br/>           i---EVKPIAEDTYELRHRIRRNQIEAC-----TEACFSDLLRGAFHLGGYYGKLSIASFH----QAEHSELQgkQOYQLRGATLEGYREQKAGSSLTKHAEELRKRKADLLWCNAR---SASGYKKLGFSQGEVFDT----ppvghilykrit</p> <p><b>BLAST:</b> aliSize=44 (resi) iden=19.01% (27/145) simi=30.99% (44/145)<br/>           ievkpinaedtye-----LRHRIRRNQIEACF--ESDLLRGAFHLGGYYG---KLSIASFHQAEHSELQ---QKQYQIRGA-TLEGYREQKAGSSLTKHAEELRKRKADLLWCNA---R--SASGYKKLGFSQGEV-----fdtpvghilykrit</p> <p><b>Proposed:</b> aliSize=131 (resi) RMSD=2.05 (Å)<br/>           --EVKPIA--aED-TYELRHRIRRNQIEAC-MF--esDL--LRGAFHLGGYYGKLSIASFHQAEHS-E-LOGQKQYQIRGMATLEGYREQKAGSSLTKHAEELRKRKADLLWCNART-S--ASGYKKLGFSQGEVfdtpvghilykrit</p> |
|     | 2vbqA (147) |   |       | <p><b>Proposed:</b> aliSize=131 (resi) RMSD=2.05 (Å)<br/>           --EVKPIA--aED-TYELRHRIRRNQIEAC-MF--esDL--LRGAFHLGGYYGKLSIASFHQAEHS-E-LOGQKQYQIRGMATLEGYREQKAGSSLTKHAEELRKRKADLLWCNART-S--ASGYKKLGFSQGEVfdtpvghilykrit</p>                                                                                                                                                                                                                                                                                                                                                                                                                                                                                                                                                                                                                                                                                                                               |
| 574 | 2bswA (145) | C | 15.28 | <p><b>TM-align:</b> aliSize=127 (resi) RMSD=2.53 (Å)<br/>           iEVKPIA--ED-TYELRHRIRRNQIEAC--FE--SD-LLRGAFHLGGYYGKLSIASFHQAEHSE-LOGQKQYQIRG-ATLEGYREQKAGSSLTKHAEELRKRKADLLWCNART-S--ASGYKKLGFSQGEVFDTPpvvghilykrit----</p> <p><b>SARST:</b> aliSize=125 (resi) RMSD=3.94 (Å)<br/>           ie-VKPIAEDTYELRHRIRRNQIEAC-----TEACFSDLLRGAFHLGGYYGKLSIASFH----QAEHSELQgkQOYQLRGATLEGYREQKAGSSLTKHAEELRKRKADLLWCNAR---SASGYKKLGFSQGEVFDT----ppvghilykrit</p> <p><b>BLAST:</b> aliSize=44 (resi) iden=19.01% (27/144) simi=30.99% (44/144)<br/>           ievkpinaedtye-----LRHRIRRNQIEACF--ESDLLRGAFHLGGYYG---KLSIASFHQAEHSELQ---QKQYQIRGA-TLEGYREQKAGSSLTKHAEELRKRKADLLWCNA---R--SASGYKKLGFSQGEV-----fdtpvghilykrit</p> <p><b>Proposed:</b> aliSize=132 (resi) RMSD=2.15 (Å)<br/>           iEVKPIA--ED-TYELRHRIRRNQIEAC-MF--esDL--LRGAFHLGGYYGKLSIASFHQAEHS-E-LOGQKQYQIRGMATLEGYREQKAGSSLTKHAEELRKRKADLLWCNART-S--ASGYKKLGFSQGEVfdtpvghilykrit</p>       |
|     | 2vbqB (144) |   |       | <p><b>Proposed:</b> aliSize=132 (resi) RMSD=2.15 (Å)<br/>           iEVKPIA--ED-TYELRHRIRRNQIEAC-MF--esDL--LRGAFHLGGYYGKLSIASFHQAEHS-E-LOGQKQYQIRGMATLEGYREQKAGSSLTKHAEELRKRKADLLWCNART-S--ASGYKKLGFSQGEVfdtpvghilykrit</p>                                                                                                                                                                                                                                                                                                                                                                                                                                                                                                                                                                                                                                                                                                                                 |
| 575 | 2c49A (299) | M | 17.39 | <p><b>TM-align:</b> aliSize=265 (resi) RMSD=3.61 (Å)<br/>           g-KM-E-KITCVHTAEDYELRHRIRRNQIEAC--FE--SD-LLRGAFHLGGYYGKLSIASFHQAEHS-E-LOGQKQYQIRG-ATLEGYREQKAGSSLTKHAEELRKRKADLLWCNART-S--ASGYKKLGFSQGEVFDTPpvvghilykrit----</p> <p><b>SARST:</b> aliSize=213 (resi) RMSD=5.30 (Å)<br/>           gkmekitevghtalgyiifvekpepntsiqipsa-----svrenilfgmgnp11disavvdkdfldkyslkpndqilaedkhkeIfde</p> <p><b>BLAST:</b> aliSize=113 (resi) iden=22.07% (66/299) simi=37.79% (113/299)<br/>           gkmekitevghtalgyiifvekpepntsiqipsa-----svrenilfgmgnp11disavvdkdfldkyslkpndqilaedkhkeIfde</p> <p><b>Proposed:</b> aliSize=255 (resi) RMSD=2.31 (Å)<br/>           gkm-E-KITCVHTAEDYELRHRIRRNQIEAC--FE--SD-LLRGAFHLGGYYGKLSIASFHQAEHS-E-LOGQKQYQIRG-ATLEGYREQKAGSSLTKHAEELRKRKADLLWCNART-S--ASGYKKLGFSQGEVFDTPpvvghilykrit----</p>                                                                                                                           |
|     | 2i6bB (326) |   |       | <p><b>Proposed:</b> aliSize=255 (resi) RMSD=2.31 (Å)<br/>           gkm-E-KITCVHTAEDYELRHRIRRNQIEAC--FE--SD-LLRGAFHLGGYYGKLSIASFHQAEHS-E-LOGQKQYQIRG-ATLEGYREQKAGSSLTKHAEELRKRKADLLWCNART-S--ASGYKKLGFSQGEVFDTPpvvghilykrit----</p>                                                                                                                                                                                                                                                                                                                                                                                                                                                                                                                                                                                                                                                                                                                         |



|     |                                       |   |                                                                                                                                                                                                                                                                                                                                                                                                                                                                                                                                                                                                                                                                                                                                                                                                                                                                                                                                                                                           |
|-----|---------------------------------------|---|-------------------------------------------------------------------------------------------------------------------------------------------------------------------------------------------------------------------------------------------------------------------------------------------------------------------------------------------------------------------------------------------------------------------------------------------------------------------------------------------------------------------------------------------------------------------------------------------------------------------------------------------------------------------------------------------------------------------------------------------------------------------------------------------------------------------------------------------------------------------------------------------------------------------------------------------------------------------------------------------|
| 576 | <p>2cnmA (151)</p> <p>1s3zB (145)</p> | C | <p>14.48</p> <p><b>TM-align:</b> aliSize=127 (resi) RMSD=2.16 (Å)<br/> mNTISLSTDPAAWQTEORAHAFPWSEKTF--G--NQ-GE-RYLNKLTADDRMAAFAITOVVL-----DEATFNIAVDPDFORRCLGRMLEHLIDELETRVVTLWLEVRASNAAAIALYESLGFNEATI<b>RRNYyptagghc</b>daiimalpismklh----</p> <p><b>SARST:</b> aliSize=121 (resi) RMSD=3.02 (Å)<br/> mn-TISLSTDPAAWQTEORAHAFPWSEKTF--G--NQ-GE-RYLNKLTADDRMAAFAITOVVL-----DEA---TFNIAVDPDFORRCLGRMLEHLIDELETRVVTLWLEVRASNAAAIALYESLGFNEATI<b>RR----</b>nyyptagghedaiimalpismklh</p> <p><b>BLAST:</b> aliSize=43 (resi) iden=16.55% (24/145) simi=29.66% (43/145)<br/> mntisilsttdlpaawqieqrahaipwsektffgn-----GGERYLNKLTADDRMAAFAITOVVL-----EATL---NTAIVDPDFORRCLGRMLEHLIDELETRVVTLWLEVRASNAAAIALYESLGFNEATI<b>RRNY--</b>ptagghedaiimalpismklh</p> <p><b>Proposed:</b> aliSize=131 (resi) RMSD=1.88 (Å)<br/> mNTISLSTDPAAWQTEORAHAFPWSEKTF--G--NQ-GE-RYLNKLTADDRMAAFAITOVVL-----DEATFNIAVDPDFORRCLGRMLEHLIDELETRVVTLWLEVRASNAAAIALYESLGFNEATI<b>Rrnyyptagghc</b>DAIIMAL-pismklh</p>     |
| 577 | <p>2cnmA (151)</p> <p>2vbqA (147)</p> | C | <p>13.61</p> <p><b>TM-align:</b> aliSize=128 (resi) RMSD=2.31 (Å)<br/> -MNTISLSTDPAAWQTEORAHAFPWSEKTF--G--NQ-GE-RYLNKLTADDRMAAFAITOVVL-----DEATFNIAVDPDFORRCLGRMLEHLIDELETRVVTLWLEVRASNAAAIALYESLGFNEATI<b>RRNYyptagghc</b>daiimalpismklh----</p> <p><b>SARST:</b> aliSize=122 (resi) RMSD=3.26 (Å)<br/> m--NTISLSTDPAAWQTEORAHAF--WS-----EKTFFGngGERYLNKLTADDRMAAFAITOVV-----LDEA---TFNIAVDPDFORRCLGRMLEHLIDELETRVVTLWLEVRASNAAAIALYESLGFNEATI<b>RR----</b>nyyptagghedaiimalpismklh</p> <p><b>BLAST:</b> aliSize=43 (resi) iden=16.33% (24/147) simi=29.25% (43/147)<br/> mntisilsttdlpaawqieqrahaipwsektffgn-----GGERYLNKLTADDRMAAFAITOVVL-----EATL---NTAIVDPDFORRCLGRMLEHLIDELETRVVTLWLEVRASNAAAIALYESLGFNEATI<b>RRNY--</b>ptagghedaiimalpismklh</p> <p><b>Proposed:</b> aliSize=131 (resi) RMSD=2.00 (Å)<br/> -MNTISLSTDPAAWQTEORAHAFPWSEKTF--G--NQ-GE-RYLNKLTADDRMAAFAITOVVL-----DEATFNIAVDPDFORRCLGRMLEHLIDELETRVVTLWLEVRASNAAAIALYESLGFNEATI<b>Rrnyyptagghc</b>DAIIMAL-pismklh</p> |
| 578 | <p>2cswA (145)</p> <p>1j4kA (158)</p> | C | <p>13.79</p> <p><b>TM-align:</b> aliSize=109 (resi) RMSD=2.55 (Å)<br/> gssgsgvtgdrAGSWCRRVGM--SAGWLLLEDGCEVTVGRFGVTVOLVskicPLMISRNHCVLKONPE-----GOWTMDNkSLNGVWNRARLEPLRVYSIHOGYIOLGVPLENKEnAEYEYE<b>TEEDwetivnc</b>lspksgpssg-----</p> <p><b>SARST:</b> aliSize=95 (resi) RMSD=9.39 (Å)<br/> gssgsgvtgdr--AGGRSWCLRR-VGMSAGWLLLEDGCEVTVGRFGVTVOLVskicPLM-----ISRN--HCVLKONPEGOWT--IMDNkSLNGVWNRARLEPLRVYSIHOGYIOLGVPLENKEnAEYEYE<b>TEEDwetivnc</b>lspksgpssg-----</p> <p><b>BLAST:</b> aliSize=50 (resi) iden=15.86% (23/145) simi=34.48% (50/145)<br/> gssgsgvtgdraggrswclrrvmsagwll-----LLEDGCEVTVGRFGVTVOLVskicPLMISRNHCVLKONPE-----GOWTMDNkSLNGVWNRARLEPLRVYSIHOGYIOLGVPLENKEnAEYEYE<b>TEEDwetivnc</b>lspksgpssg-----</p> <p><b>Proposed:</b> aliSize=120 (resi) RMSD=2.22 (Å)<br/> gssgsgvtgdrAGSWCRRVGM--SAGWLLLEDGCEVTVGRFGVTVOLVskicPLMISRNHCVLKONPE-----GOWTMDNkSLNGVWNRARLEPLRVYSIHOGYIOLGVPLENKEnAEYEYE<b>TEEDwetivnc</b>lspksgpssg-----</p>                                   |

|     |                                       |   |       |                                                                                                                                                                                                                                                                                                                                                                                                                                                                                                                                                                                                                                                                                                                                                                                                                                                                                                                                                                                                                                                                                                                                                                                                                                                                                                                                                                                                                                                                                                                                                                                                                                                                                                                                                                                                                                                                                                                                                                                                                                                                                                                                                                                                                                                                                                                                                                                                                                                                                                                                                                                                                                                                                                                               |
|-----|---------------------------------------|---|-------|-------------------------------------------------------------------------------------------------------------------------------------------------------------------------------------------------------------------------------------------------------------------------------------------------------------------------------------------------------------------------------------------------------------------------------------------------------------------------------------------------------------------------------------------------------------------------------------------------------------------------------------------------------------------------------------------------------------------------------------------------------------------------------------------------------------------------------------------------------------------------------------------------------------------------------------------------------------------------------------------------------------------------------------------------------------------------------------------------------------------------------------------------------------------------------------------------------------------------------------------------------------------------------------------------------------------------------------------------------------------------------------------------------------------------------------------------------------------------------------------------------------------------------------------------------------------------------------------------------------------------------------------------------------------------------------------------------------------------------------------------------------------------------------------------------------------------------------------------------------------------------------------------------------------------------------------------------------------------------------------------------------------------------------------------------------------------------------------------------------------------------------------------------------------------------------------------------------------------------------------------------------------------------------------------------------------------------------------------------------------------------------------------------------------------------------------------------------------------------------------------------------------------------------------------------------------------------------------------------------------------------------------------------------------------------------------------------------------------------|
| 579 | <p>2cu2A (335)</p> <p>1vpaA (221)</p> | M | 18.55 | <p><b>TM-align:</b> aliSize=207 (resi) RMSD=3.08 (Å)<br/> - MKTYALVMAGGRGERLWp1SRedRKPPEPLfECKTLLATLRLAPLVPPTLLAVRRDOEAARPYADG--I-RLLLEpLGrDTAGALLGVAEALGGAERLVLPAADHYVgdDeaYREALATMEEAEGFVVALGRPTRPETeygyirlgpreyawyrgegfvekPSY---AEaLEYiRK<br/> hHMNVILLAAKGERMS--EN--VPKQLEI-EGRMFFYPSTFLKSEAIDGVVIVTRREWFVEKRVFhekVIGIVEG-GD-TRSOSRSALFELEFSPSYVLDHDSARPF--L--RKKHVSEVRRRTGAATIAKNSDAL-----VRVendrIE-YIP-RK</p> <p>YVWNGGVFAFAPATMAELFRrhlpShhealerllagasleevyaglpkISIDY-GVMEAE-RVRVLLRFPWDDGNWRAERVFSQDphenvv-Lgegrhvaldtfgcvvyadrgvvatlgvsglvvakvgdevlvvpkdwarevrevvkrlea---<br/> VYRILTPOAFSYEILKKAHE---N-G-----G-EWAdtEPVQLGVKIALVE-DPLCFKTFKEDLARI-----aR-----ew</p> <p><b>SARST:</b> aliSize=166 (resi) RMSD=11.05 (Å)<br/> m--KTYALVMAGGRGERLWp1SRedRKPPEPLfECKTLLATLRLAPLVPPE--RTLLAVRRDOEAARPYAD--GIRLLLEpLRDTAGALLGVAEALGGAERLVLPAADHYVGDDEAYREALATMLEAEGFVVALGRPTRPETEYGYIRL----GPREGAWRGEGFVEKPSYAEALEYI<br/> --hHMNVILLAAKGERMS--EN--VPKQLEI-EGRMFFYPSTFLKSEAIDGVVIVTRREWFVEKRVFhekVIGIVEG-GD-TRSOSRSALFELEFSPSYVLDHDSARPF--L--RKKHVSEVRRRTGAATIAKNSDAL-----ALVRVendrIEYIPRKGVVILTPOAFSYEILKKAH</p> <p>RKYY-----wnggvafapatmaelfrhrhlpshhealerllagasleevyaglpkisiidygvmekaervrvlgrfpwddvgnwralervfsqphenvvlggrhvaldtfgcvvyadrgvvatlgvsglvvakvgdevlvvpkdware<br/> ENGEwaddtepvqklgvkialvegdpfcfkvtfkedelariiarew</p> <p>vrevvkrlea<br/> -----</p> <p><b>BLAST:</b> aliSize=104 (resi) iden=26.70% (59/221) simi=47.06% (104/221)<br/> mky-----ALVMAGGRGERLWp1SRedRKPPEPLfECKTLLATLRLAPLVPPTLLAVRRDOEAARPYADGTRLLLEpLRDTAGALLGVAEALGGAERLVLPAADHYVGDDEAYREALATMLEAEGFVVALGRPTRPETEYGYIRLGPREGAWRGEGFVEKPSYAEALEYIRK<br/> ----hHMNVILLAAKGERMS--EN--VPKQLEI-EGRMFFYPSTFLKSEAIDGVVIVTRREWFVEKRVFhekVIGIVEG-GD-TRSOSRSALFELEFSPSYVLDHDSARPF--L--RKKHVSEVRRRTGAATIAKNSDAL-----ILTPQ-AFSYEILKKA</p> <p>GYVwNGGVFAFapatmaelfrhrhlpSHHEALERLAGASLEevyaglpkISIDYGVMEAE-RVRVLLRFPWDDGNWRAERVFSQDphenvvlggrhvaldtfgcvvyadrgvvatlgvsglvvakvgdevlvvpkdwarevrevvkrlea<br/> AHE--NGGEWA-----DDT-EPVQKLGVKIALVE-DLFCFKVTFKEDLARI-----aR-----ew</p> <p><b>Proposed:</b> aliSize=205 (resi) RMSD=2.39 (Å)<br/> - MKTYALVMAGGRGERLWp1SRedRKPPEPLfECKTLLATLRLAPLVPPE--RTLLAVRRDOEAARPYADG--I-RLLLEpLGrDTAGALLGVAEALGGAERLVLPAADHYVgdDeaYREALATMEEAEGFVVALGRPTRPETEYGYIRLGPREGAWRGEGFVEKPSYAEALEYIRK<br/> hHMNVILLAAKGERMS--EN--VPKQLEI-EGRMFFYPSTFLKSEAIDGVVIVTRREWFVEKRVFhekVIGIVEG-GD-TRSOSRSALFELEFSPSYVLDHDSARPF--L--RKKHVSEVRRRTGAATIAKNSDAL-----ALVRVEND-----IYIPR-----KQVY</p> <p>WNGGVFAFAPATMAELFRrhlpShhealerllagasleevyaglpkISIDY-GVMEAE-RVRVLLRFPWDDGNWRAERVFSQDphenvvlggrhvaldtfgcvvyadrgvvatlgvsglvvakvgdevlvvpkdwarevrevvkrlea<br/> RILTPOAFSYEILKKAHE---NG-----G-EWAdtEPVQLGVKIALVE-DPLCFKTFKEDLARIiarew-----</p> |
| 580 | <p>2cu2A (335)</p> <p>1vpaB (220)</p> | M | 16.82 | <p><b>TM-align:</b> aliSize=207 (resi) RMSD=3.09 (Å)<br/> - MKTYALVMAGGRGERLWp1SRedRKPPEPLfECKTLLATLRLAPLVPPTLLAVRRDOEAARPYADG--I-RLLLEpLGrDTAGALLGVAEALGGAERLVLPAADHYVgdDeaYREALATMEEAEGFVVALGRPTRPETeygyirlgpreyawyrgegfvekPS---YAEAIEYiRK<br/> hHMNVILLAAKGERMS--EN--VPKQLEI-EGRMFFYPSTFLKSEAIDGVVIVTRREWFVEKRVFhekVIGIVEG-GD-TRSOSRSALFELEFSPSYVLDHDSARPF--L--RKKHVSEVRRRTGAATIAKNSDALV-----RVendrIEYI-PR--KQ</p> <p>YVWNGGVFAFAPATMAELFRrhlpShhealerllagasleevyaglpkISIDY-GVMEAE-RVRVLLRFPWDDGNWRAERVFSQDphenvv-Lgegrhvaldtfgcvvyadrgvvatlgvsglvvakvgdevlvvpkdwarevrevvkrlea--<br/> VYRILTPOAFSYEILKKAHE---NG-----G-EWAdtEPVQLGVKIALVE-DPLCFKTFKEDLARI-----aR-----ew</p> <p><b>SARST:</b> aliSize=176 (resi) RMSD=9.63 (Å)<br/> mk-TYALVMAG--GRGERLWp1SRedRKPPEPLfECKTLLATLRLAPLVPPE--RTLLAVRRDOEAARPYADG--ADGIRLLEpLRDTAGAVLlgVAEALGGAERLVLPAADHYVGDDEAYREALATMLEAEGFVVALGRPTRPETEYGYIRLGPREGAWRGEGFVEKPSYAEALEYIRK<br/> --hHMNVILLAAKGERMS--EN--VPKQLEI-EGRMFFYPSTFLKSEAIDGVVIVTRREWFVEKRVFhekVIGIVEG-GD-TRSOSRSALFELEFSPSYVLDHDSARPF--L--RKKHVSEVRRRTGAATIAKNSDALV-----DAVRVENDR-----IYIP-----RK</p> <p>YVWNGGVFAFAPATMAELFRrhlpSHHEALERLAGASLEevyaglpkISIDYGVMEAE-RVRVLLRFPWDDGNWRAERVFSQDphenvvlggrhvaldtfgcvvyadrgvvatlgvsglvvakvgdevlvvpkdwarevrevvkrlea<br/> VYRILTPOAFSYEILKKAHENggewadd-----TEPVQKLGVKIALVE-DLFCFKVTFKEDLARIiarew-----</p> <p><b>BLAST:</b> aliSize=104 (resi) iden=26.82% (59/220) simi=47.27% (104/220)<br/> mky-----ALVMAGGRGERLWp1SRedRKPPEPLfECKTLLATLRLAPLVPPTLLAVRRDOEAARPYADGTRLLLEpLRDTAGAVLlgVAEALGGAERLVLPAADHYVGDDEAYREALATMLEAEGFVVALGRPTRPETEYGYIRLGPREGAWRGEGFVEKPSYAEALEYIRK<br/> ----hHMNVILLAAKGERMS--EN--VPKQLEI-EGRMFFYPSTFLKSEAIDGVVIVTRREWFVEKRVFhekVIGIVEG-GD-TRSOSRSALFELEFSPSYVLDHDSARPF--L--RKKHVSEVRRRTGAATIAKNSDALV-----ILTPQ-AFSYEILKKA</p> <p>GYVwNGGVFAFapatmaelfrhrhlpSHHEALERLAGASLEevyaglpkISIDYGVMEAE-RVRVLLRFPWDDGNWRAERVFSQDphenvvlggrhvaldtfgcvvyadrgvvatlgvsglvvakvgdevlvvpkdwarevrevvkrlea<br/> AHE--NGGEWA-----DDT-EPVQKLGVKIALVE-DLFCFKVTFKEDLARI-----aR-----ew</p> <p><b>Proposed:</b> aliSize=204 (resi) RMSD=2.44 (Å)<br/> - MKTYALVMAGGRGERLWp1SRedRKPPEPLfECKTLLATLRLAPLVPPE--RTLLAVRRDOEAARPYADG--I-RLLLEpLRDTAGALLGVAEALGGAERLVLPAADHYVGDDEAYREALATMLEAEGFVVALGRPTRPETEYGYIRLGPREGAWRGEGFVEKPSYAEALEYIRK<br/> hHMNVILLAAKGERMS--EN--VPKQLEI-EGRMFFYPSTFLKSEAIDGVVIVTRREWFVEKRVFhekVIGIVEG-GD-TRSOSRSALFELEFSPSYVLDHDSARPF--L--RKKHVSEVRRRTGAATIAKNSDALV-----ALVRVEND-----DAI-EYIP-----RKQVY</p> <p>WNGGVFAFAPATMAELFRrhlpShhealerllagasleevyaglpkISIDY-GVMEAE-RVRVLLRFPWDDGNWRAERVFSQDphenvvlggrhvaldtfgcvvyadrgvvatlgvsglvvakvgdevlvvpkdwarevrevvkrlea<br/> RILTPOAFSYEILKKAHE---N-G-----G-EWAdtEPVQLGVKIALVE-DPLCFKTFKEDLARIiarew-----</p>  |
| 581 | <p>2e3dA (286)</p> <p>liniA (225)</p> | M | 15.11 | <p><b>TM-align:</b> aliSize=208 (resi) RMSD=2.74 (Å)<br/> NTKVKKAVIVAGLITRPLPatkaIKEMPLVDKPLIOYVNECIAGITETLVTHSSKNSIENH-FDTsfeleamlerqlldevqsiCpvhVTMOQRQIAKGLGHAVLCAHPVVD-EPVAIILPDVILDeyesdlsqNDLAEMIIRRFDEIGHSOIMVEPVADVTAygVVDCKGVELPAGESV<br/> THLDVCAVFAAGFRNQT--B-CPQYISIGNOTILEHSIHALLHPRVKRVIAISPGRSRAQLPLAN-----H--POITV-DG--D-ERADSLAGLKAAGdaQWVLDHDAARPLCHL---Q--DRLALLALSETSRGTGLAAPPVrdTMKR-----</p> <p>pmvgvvek-----PKADVAPSNIIVGRYVLSA-DIWPLAK--TPPEIQ-L-TDAIDMLIEKETVEAYHMKGKSHDCGNKLGYSQFVEYgiRhntlgtefkawleem<br/> -----aepgknaiaHTVDRNGLWHALTPOFPprelhdCLTRANEgATITDeASALEYCGFHPQLVEGRADNIKVTRPEDLALAEFYL--T-----</p> <p><b>SARST:</b> aliSize=212 (resi) RMSD=9.00 (Å)<br/> nt--KVKKAVIVAGLITRPLPatkaIKEMPLVDKPLIOYVNECIAGITETLVTHSSKNSIENH-FDTsfeleamlerqlldevqsiCpvhVTMOQRQIAKGLGHAVLCAHPVVD-EPVAIILPDVILDeyesdlsqNDLAEMIIRRFDEIGHSOIMVEPVADVTAygVVDCKGVELPAGESV<br/> --thLDVCAVFAAGFRNQT--B-CPQYISIGNOTILEHSIHALLHPRVKRVIAISPGRSRAQLPLAN-----H--POITV-DG--D-ERADSLAGLKAAGdaQWVLDHDAARPLCHL---Q--DRLALLALSETSRGTGLAAPPVrdTMKR-----EPGN</p> <p>PMVGvvekadvAPSNIIVGRYVLSA-DIWPLAK--TPPEIQ-L-TDAIDMLIEKETVEAYHMKGKSHDCGNKLGYSQFVEYgiRhntlgtefkawleem<br/> AHTV-----DRNGLWHALTPOFPprelhdCLTRANEgATITDeASALEYCGFHPQLVEGRADNIKVTRPEDLALAEFYL--T-----</p> <p><b>BLAST:</b> aliSize=70 (resi) iden=18.67% (42/225) simi=31.11% (70/225)<br/> ntkvvk-----ALVAVAGLITRPLPatkaIKEMPLVDKPLIOYVNECIAGITETLVTHSSKNSIENH-FDTsfeleamlerqlldevqsiCpvhVTMOQRQIAKGLGHAVLCAHPVVD-EPVAIILPDVILDeyesdlsqNDLAEMIIRRFDEIGHSOIMVEPVADVTAygVVDCKGVELPAGESV<br/> ----thLDVCAVFAAGFRNQT--B-CPQYISIGNOTILEHSIHALLHPRVKRVIAISPGRSRAQLPLAN-----H--POITV-DG--D-ERADSLAGLKAAGdaQWVLDHDAARPLCHL---Q--DRLALLALSETSRGTGLAAPPVrdTMKR-----aepgknaiaHTV</p> <p>-----vtaygvvdckgvelapagesvpmvgvvekadvapsniivgrylvlsadiwplaktpeiqltdaidmlieketveayhmkgkshdcgnklygymqafveygirhntlgtefkawleem<br/> rnglwhaltpqfprelhdcltrainegatiideasaleycghpqlvegradnikvtrpedlalaefytl-----</p> <p>em<br/> --</p> <p><b>Proposed:</b> aliSize=216 (resi) RMSD=2.47 (Å)<br/> NTKVKKAVIVAGLITRPLPatkaIKEMPLVDKPLIOYVNECIAGITETLVTHSSKNSIENH-FDTsfeleamlerqlldevqsiCpvhVTMOQRQIAKGLGHAVLCAHPVVD-EPVAIILPDVILDeyesdlsqNDLAEMIIRRFDEIGHSOIMVEPVADVTAygVVDCKGVELPAGESV<br/> THLDVCAVFAAGFRNQT--B-CPQYISIGNOTILEHSIHALLHPRVKRVIAISPGRSRAQLPLAN-----H--POITV-DG--D-ERADSLAGLKAAGdaQWVLDHDAARPLCHL---Q--DRLALLALSETSRGTGLAAPPVrdTMKR-----A-</p> <p>PMVGvvekadvAPSNIIVGRYVLSA-DIWPLAK--TPPEIQ-L-TDAIDMLIEKETVEAYHMKGKSHDCGNKLGYSQFVEYgiRhntlgtefkawleem<br/> AHTV-----TVDRNGLWHALTPOFPprelhdCLTRANEgATITDeASALEYCGFHPQLVEGRADNIKVTRPEDLALAEFYL--T-----</p>                                                                                                                 |

|     |                |   |       |                                                                                                                                                                                                                                                                                                                                                                                                                                                                                                                                                                                                                                                                                                                                                                                                                                                                                                                                                                                                                                                                                                                                                                                                                                                                                                                                                                                                                                                                                                                                                                                                                                                                                                                                                                                                                                                                                                                                                                                                                                                                                                                                                                                                                                                                                                                                                                                                                                                                                                                                                                                                                                                                                                                                                                                                                               |
|-----|----------------|---|-------|-------------------------------------------------------------------------------------------------------------------------------------------------------------------------------------------------------------------------------------------------------------------------------------------------------------------------------------------------------------------------------------------------------------------------------------------------------------------------------------------------------------------------------------------------------------------------------------------------------------------------------------------------------------------------------------------------------------------------------------------------------------------------------------------------------------------------------------------------------------------------------------------------------------------------------------------------------------------------------------------------------------------------------------------------------------------------------------------------------------------------------------------------------------------------------------------------------------------------------------------------------------------------------------------------------------------------------------------------------------------------------------------------------------------------------------------------------------------------------------------------------------------------------------------------------------------------------------------------------------------------------------------------------------------------------------------------------------------------------------------------------------------------------------------------------------------------------------------------------------------------------------------------------------------------------------------------------------------------------------------------------------------------------------------------------------------------------------------------------------------------------------------------------------------------------------------------------------------------------------------------------------------------------------------------------------------------------------------------------------------------------------------------------------------------------------------------------------------------------------------------------------------------------------------------------------------------------------------------------------------------------------------------------------------------------------------------------------------------------------------------------------------------------------------------------------------------------|
| 582 | 2e3dA<br>(286) | M | 14.48 | <p><b>TM-align:</b> aliSize=207 (resi) RMSD=2.67 (Å)<br/>           NTKVKKVTPVAGLITRMIPATkaIKEMPLVDKPIIOVYVNECTAAG-TETIILVTHSSKN-SIENHFDTsfleamlerqlldevqsiCpPHVTIMQROIIAkGLGHAMLCAPVVG--DE-PAAILPDVILDeysdLSqDNLAEIMI RRFDeTGHsQIMVEPV-ADVTAygvvdckgvelapge<br/>           HHMN-VAILLAACKIERNSENV---PKQFETIEGRMFEPLSTFLKSEAIDGVIIVRREWFVVEKRVF-----H--EKVLGIVEG--D-TRSQSRSLEFLekfSPsYLLHDSARPFLL----RK-KHVSEVLRAR-ETGAATLALKNSDALVR-----</p> <p>svpmvgvvek-----PKADvAPSNLAIVGRYVLS-ADIWPLLAkTPpIO-LDAIDMIEKETVEAYHMKGKSHDCGNLGYMOAFVEYGiRHNtlgtfkwleem<br/>           -----vendrIEYTP-RKGVYRILTPOAFsyEILKKAHENGg--EWaddTEPVOKI-G-VKIALVEGDPLCFKVTfEDLELARIAR-EWE-----</p> <p><b>SARST:</b> aliSize=209 (resi) RMSD=7.50 (Å)<br/>           ntkvk----KIVIPVAGLITRMIPATkaIKEMPLVDKPIIOVYVNECTA-AGTETIILVTHSSKNSTENHFDTSFleamlerqlldevqsiCpPHvtimqVROGLAKGLGHAMLCAPVVG---GDEPAAAILPDVILdeYESDLSQdnLAEMI RRFDeTGHsQIMVEPVADvtaYGVVDCKGVELAP<br/>           -----hhmvVAILLAACKIERNSENV---PKQFETIEGRMFEPLSTFLKSEAIDGVIIVRREWFVVEKRVFHEK-----VL-----GIVEGGDTRsQSRSLEFLekfSPSYLLHDSAR----PFLRKKH--VSEVLRAR-ETGAATLALKNSD---ALVRVENDRIEYI</p> <p>GESVPMVGvvekpkadvapsnlaivgrYVLSADWPLLA---KTPPEiqltDAIDMIEKETVEAYHMKGKSHDCGNLGYMOAFVEYGiRHNtlgtfkwleem<br/>           PRKGVYRILTPOAFsyEILKKAHENGg--EWaddTEPVOKI-G-VKIALVEGDPLCFKVTfEDLELARIAREWE-----</p> <p><b>BLAST:</b> aliSize=30 (resi) iden=6.79% (15/221) simi=13.57% (30/221)<br/>           ntkvkk-----KIVIPVAGLITRMIPATkaIKEMPLVDKPIIOVYVNECTA-AGTETIILVTHSSKNSTENHFDTSFleamlerqlldevqsiCpPHvtimqVROGLAKGLGHAMLCAPVVG---GDEPAAAILPDVILdeYESDLSQdnLAEMI RRFDeTGHsQIMVEPVADvtaYGVVDCKGVELAP<br/>           -----hhmvVAILLAACKIERNSENV---PKQFETIEGRMFEPLSTFLKSEAIDGVIIVRREWFVVEKRVFHEK-----VL-----GIVEGGDTRsQSRSLEFLekfSPSYLLHDSAR----PFLRKKH--VSEVLRAR-ETGAATLALKNSD---ALVRVENDRIEYI</p> <p>tepvqklgkialvegdplcfkvtfkdlelariiarewe-----hssknsienhfdtsfeamlerqlldevqsiCpPHvtimqVROGLAKGLGHAMLCAPVVG---GDEPAAAILPDVILdeYESDLSQdnLAEMI RRFDeTGHsQIMVEPVADvtaYGVVDCKGVELAPsvpmvgvvekpkadvapsnlaiv<br/>           gryvlsadiwpllaktppeiqltdaidmlieketveayhmkgkshdcgnlgymaqfveygirhntlgtefkawleem</p> <p><b>Proposed:</b> aliSize=212 (resi) RMSD=2.35 (Å)<br/>           NTKVKKVTPVAGLITRMIPATkaIKEMPLVDKPIIOVYVNECTAAG-TETIILVTHSSKN-SIENHFDTsfleamlerqlldevqsiCpPHVTIMQROIIAkGLGHAMLCAPVVG--DE-PAAILPDVILDeysdLSqDNLAEIMI RRFDeTGHsQIMVEPVADvtaYGVVDCKGVELAPges<br/>           HHMN-VAILLAACKIERNSENV---PKQFETIEGRMFEPLSTFLKSEAIDGVIIVRREWFVVEKRVF-----H--EKVLGIVEG--D-TRSQSRSLEFLekfSPsYLLHDSARPFLL----RK-KHVSEVLRAR-ETGAATLALKNSD---SDALVRVE-N-----</p> <p>VPMVGVVekpkadvapsnlaivgrYVLSADWPLLA---KTPPEiqltDAIDMIEKETVEAYHMKG-KSHDCGNLGYMOAFVEYGiRHNtlgtfkwleem<br/>           DRIEYTP-----RKGVYRILTPOAFsyEILKKAHENGg--EWaddTEPVOKI-G-VKIALVEG-DpLFCFKVTfEDLELARIAR-EWE-----</p> |
|     | 1vpaA<br>(221) |   |       |                                                                                                                                                                                                                                                                                                                                                                                                                                                                                                                                                                                                                                                                                                                                                                                                                                                                                                                                                                                                                                                                                                                                                                                                                                                                                                                                                                                                                                                                                                                                                                                                                                                                                                                                                                                                                                                                                                                                                                                                                                                                                                                                                                                                                                                                                                                                                                                                                                                                                                                                                                                                                                                                                                                                                                                                                               |
| 583 | 2f5gA<br>(130) | C | 5.38  | <p><b>TM-align:</b> aliSize=83 (resi) RMSD=3.00 (Å)<br/>           elkstrhtkyCNYHFVWIPKhrRnTIVNEIAEYTKVELKSTAEELCEIiAEVMPDHIHLFVNCPPRYAPsYLANYFKGksArliikfpqlnkgKLWTRSYFV-ATAGNVsSevikkyieeqwrkege-----<br/>           -----GHLRLIYLSCAT-D--G-SYPDLRDIMAKSEVNNLRDITG-M-CYGNMFLQTLQEGDROKVS-ETYARILK--D-----PRHH-SAEIvEFKAIEE-----rtfinwsmrlvqlgemdsdtirrlrkyspaatfqrsmtaeqcfrflkelydmsqg</p> <p><b>SARST:</b> aliSize=98 (resi) RMSD=12.20 (Å)<br/>           elkstrhtk--YLCNHFVWIPKhrRnTIVNEIAEYTKVELKSTAEELCEIiAEVMPDHIHLFVNCPPRYapsylanYFKGSARLILKRFOLNKG-KLWTRSY-----FVAAGNVsSEVIKkyIEE-----qwrkege<br/>           -----gHLRLIYLSCATD-----G-SYPDLRDIMAKSEVNNLRDITG-M-CYGNMFLQTLQEGD-----ROVSETYARILDRHHSAAIEVEFKAIERTfinwsmRLVQLGEMSDTIRRLRLKyspaatfqrsmtaeqcfrflkelydmsqg-----</p> <p><b>BLAST:</b> aliSize=23 (resi) iden=10.77% (14/130) simi=17.69% (23/130)<br/>           elkstrhtkylcnyhfvwipkhrnrtlvn-----EIAEYTKVELKSTAEELCEIiAEVMPDHIHLFVNCPPRYAPsYLANYFKGKSARLILKRF-----qlnkgklwtrsyfva<br/>           -----gHLRLIYLSCATDglsypdlrdimaksevnlnrdigtgmcyngmflqtlqlegrqKVS-ETYARILDRPHH-SAEIvEFKAIEERT--FINWSMRLVQ--LGEMSDTIRRLRLKyspaatfqrsmtaeqcfrflkelydmsqg-----</p> <p>tagnvsssevikkyieeqwrkege<br/>           -----</p> <p><b>Proposed:</b> aliSize=94 (resi) RMSD=2.62 (Å)<br/>           elkstrhtkyCNYHFVWIPKhrRnTIVNEIAEYTKVELKSTAEELCEIiAEVMPDHIHLFVNCPPRYAPsYLANYFKGksArliikfpqlnkgKLWTRSYFVAT-----agnvsEvIKKYIEEOWKEG-----E-----<br/>           -----GHLRLIYLSCAT-D--G-SYPDLRDIMAKSEVNNLRDITG-M-CYGNMFLQTLQEGDROKVS-ETYARILK--D-----PRHHSAAIEVEFKAIERTfinwsmrlvqlg-----E-MSDTIRRLRLKyspaatfqrsmtaeqcfrflkelydmsqg</p>                                                                                                                                                                                                                                                                                                                                                                                                                                                                                                                                                                                                                                                                                                                                                                                                                                                                                                                                                                                                                                                                                                                                                                                  |
|     | 1x0pE<br>(141) |   |       |                                                                                                                                                                                                                                                                                                                                                                                                                                                                                                                                                                                                                                                                                                                                                                                                                                                                                                                                                                                                                                                                                                                                                                                                                                                                                                                                                                                                                                                                                                                                                                                                                                                                                                                                                                                                                                                                                                                                                                                                                                                                                                                                                                                                                                                                                                                                                                                                                                                                                                                                                                                                                                                                                                                                                                                                                               |
| 584 | 2fckA<br>(174) | C | 11.24 | <p><b>TM-align:</b> aliSize=141 (resi) RMSD=3.54 (Å)<br/>           tpdfqivtORLQLRLITAdEAeELVOCIRQS-OTLHOWVDFWsqeAEFOFIQ-ATRLnwVKAeAYGFGVFEROT-----OTLVGVAINEFYHT-FN-A-SGYWIGDR-YORQYCKEATAIILFCFeLELTRLEIVCDPENVPsQALALRCGANREOL----APNRFLVAGEpkagivfslip-<br/>           -----kFVIRPATAADCS-DILRLIKELAKYEYMEEQVI---LTkdLLeDGFg--EHP-FVHCLVAVPKehwtpgehSIVGFAMYFTYDPWIGKLIYLEDFFVMSdYRGFIISSEIKNSQVAM--RCRCSSMHFLVAEWEPsINFYKRGASDLSseegWRLF-K-IDK-----</p> <p>yllkmatee</p> <p><b>SARST:</b> aliSize=127 (resi) RMSD=6.13 (Å)<br/>           tpdfqivtqr-LQLRLITAdEAeELVOCIRQSOTLHOWVDFWsqeAEFOFIQ-ATRLnwVKAeAYGFGVFEROTLVGVAIN-----EFYHTFNASL-----GYWIGDRYORQYCKEATAIILFCFeLELTRLEIVCDPENVPsQALALRCGANRE-----<br/>           -----kFVIRPATAADCS-DILRLIKELAKYEYME-EQVIItEKDLLE-----DGfgehpfyHCLVAEVPKEHWPECHSIVgfamyyfTYDPWIGKLIYLEDFFVMSdYRGFIISSEIKNSQVAM--RCRCSSMHFLVAEWEPsINFYKRGASDLSseegWRLFkideyllkmatee</p> <p>qlapnrflvagepkagivfslip<br/>           -----</p> <p><b>BLAST:</b> aliSize=34 (resi) iden=11.24% (19/169) simi=20.12% (34/169)<br/>           tpdfqivtqrlqlrlitadeaeelvcqirqsqtlhqwvdfwsqaeafiqatrlnwvkaeaygfgvferqtq-----kfvirpataadcsdilrlikelakyeymeeqviltekdllledgfggehpfyhclvaevpkehwtpegh-----TLVGVAINEFYHTFNASL-----YWIIGDRYORQYCKEATAIILFCFeLELTRLEIVCDPENVPsQALALRCGANREOL----APNRFLVAGEpkagivfslip<br/>           -----kfvirpataadcsdilrlikelakyeymeeqviltekdllledgfggehpfyhclvaevpkehwtpeghSIVGFAM--YFTYDPWIGKLIYLEDFFVMSdYRGFIISSEIKNSQVAM--RCRCSSMHFLVAEWEPsINFYKRGASDLSseegWRLFkideyllkmatee</p> <p>reqlapnrflvagepkagivfslip<br/>           -----</p> <p><b>Proposed:</b> aliSize=143 (resi) RMSD=3.06 (Å)<br/>           mtpdfqivtq-RLQLRLITAdEAeELVOCIRQS-OTL--HO-wvdfwsqeAE-OFIOATRL-NwVKAeAYGFGVFEROT-----OTLVGVAINEFYHT-FNMA-SGYWIGDR-YORQYCKEATAIILFCFeLELTRLEIVCDPENVPsQALALRCGANREOL----APNRFLVAGEpkagivfslip<br/>           -----kFVIRPATA-ADCS-DILRLIKELAKYEYMEEQ--VI---LTkdLLeDGFgGeHP----FVHCLVAVPKehwtpgehSIVGFAMYFTYD-PwIGKLIYLEDFFVMSdYRGFIISSEIKNSQVAM--RCRCSSMHFLVAEWEPsINFYKRGASDLSseegWRLFkideyllkmatee</p> <p>-IV--FSLip<br/>           lLkmaTEE--</p>                                                                                                                                                                                                                                                                                                                                                                                                                                                                                                                                                                                                                                                                                                              |
|     | 2g3tA<br>(169) |   |       |                                                                                                                                                                                                                                                                                                                                                                                                                                                                                                                                                                                                                                                                                                                                                                                                                                                                                                                                                                                                                                                                                                                                                                                                                                                                                                                                                                                                                                                                                                                                                                                                                                                                                                                                                                                                                                                                                                                                                                                                                                                                                                                                                                                                                                                                                                                                                                                                                                                                                                                                                                                                                                                                                                                                                                                                                               |

|     |                                               |   |       |                                                                                                                                                                                                                                                                                                                                                                                                                                                                                                                                                                                                                                                                                                                                                                                                                                                                                                                                                                                                                                                                                                                                                                                                                                                                                                                                                                                                                                                                                                                                                                                                                                                                                                                                                                                                                                                                                                             |
|-----|-----------------------------------------------|---|-------|-------------------------------------------------------------------------------------------------------------------------------------------------------------------------------------------------------------------------------------------------------------------------------------------------------------------------------------------------------------------------------------------------------------------------------------------------------------------------------------------------------------------------------------------------------------------------------------------------------------------------------------------------------------------------------------------------------------------------------------------------------------------------------------------------------------------------------------------------------------------------------------------------------------------------------------------------------------------------------------------------------------------------------------------------------------------------------------------------------------------------------------------------------------------------------------------------------------------------------------------------------------------------------------------------------------------------------------------------------------------------------------------------------------------------------------------------------------------------------------------------------------------------------------------------------------------------------------------------------------------------------------------------------------------------------------------------------------------------------------------------------------------------------------------------------------------------------------------------------------------------------------------------------------|
| 585 | <p>2fckA<br/>(174)</p> <p>2jevA<br/>(169)</p> | C | 9.47  | <p><b>TM-align:</b> aliSize=143 (resi) RMSD=3.73 (Å)<br/> tpdfqivt-ORLQRLITAEAEELVOCIRROS-OTLHOWVDWFSQOEAEQFIQATRLNWVKAeA-GFGF-FROT-----OTLVGVAINEFYHT-FN-A-S-GYWIGDR-YORQYKKA-TA1-ILFCFe-LELTRLEIVCDPEVPSOALALcGANREQL----APNRfLYAGEpkagi vfs slip-<br/> -----akFVIRPATAAACS-DILRLKELaKYEYMEEQVI--LTKDLLEDGFG--EHP-FHCLAAVPEKehwtpeghSIVGFAMYFTYDPWIGKLIY-EDFFVMSdVRGFICSI-I-KN-SQVAM-RCRCSSMHFLVAEWNEPSINFYK-RGASDLSseegwRLF-KIDKE-----y</p> <p>llkmate</p> <p><b>SARST:</b> aliSize=126 (resi) RMSD=6.80 (Å)<br/> tpdfqivtqr--LQLRLITAEAEELVOCIRROSqt-HOWVDWFS-----QqaeqfiqATRLNWVKAeA----AYGFGVFEROTQLVVAINEFY-----HTFNASL---GYWIGDRYORQYKKA-TA1-ILFCFe-LELTRLEIVCDPEVPSOALALcGANRE-----<br/> -----akFVIRPATAADCSDILRLKELaKYEYMEEQVILTE-----KDLLEDGFGGhpfyHCLVAEVPKEHWPEHSHVVG-AmyyftydPWIGKLIYleDFFVMSdVRGFICSI-I-KN-SQVAM-RCRCSSMHFLVAEWNEPSINFYK-RGASDLSseegwrlfkidkeyllkmat</p> <p>-qlapnrflyagepkagivfs slip<br/> e-----</p> <p><b>BLAST:</b> aliSize=34 (resi) iden=11.24% (19/169) simi=20.12% (34/169)<br/> tpdfqivtqrlqlrlitadeaeelvcirqsqt lhwvdfwsqaeqfiqatrlnwvkaeaygfgvferqtq-----TLQVAINeFYHFNASL-----YWIGDRYORQYKKA-TA1-ILF<br/> -----akfvirpataadcsdilrlikelakyeymeeqviltekdlldegfgehpfyhclvaevpkehwtpeghSIVGFAM--YFTYDPWIGKLIYledFFVMSdVRGFICSI-I-KN-SQV<br/> CFe-LELTRLEIVCDPEVPSOALALcGAN-----reqlapnrflyagepkagivfs slip<br/> AM-RCRCSSMHFLVAEWNEPSINFYKRGASdlssseegwrlfkidkeyllkmate-----</p> <p><b>Proposed:</b> aliSize=141 (resi) RMSD=3.04 (Å)<br/> mtpdfqivt--ORLQRL--ITAE-AeEL-VqCI-RqsqTLHO-wvDFsqqEaeQFIQATRLNW-V-KAEAYGFGF-FROT--T-----OTLVgMVAINEFYHT--FNMASGYWIG-DRYORQYKKA-TA1-ILFCFe-LELTRLEIVCDPEVPSOALALcGANREQL---APNR-fLYagEPK<br/> -----akFVIRPATAaDC-SDiL-RIK-ELak---YEYMe-EQV---I--LTKDLLEDGfGeHPFYHCL-VAVPEKehWtpeghSIVG-FAMYFTYDPWiGKLIY-EDFFVMSdVRGFICSI-I-KN-SQVAM-RCRCSSMHFLVAEWNEPSINFYK-RGASDLSseeQWRLF-KI--DKE<br/> --AGI-Vfslip<br/> yilKMaTE----</p> |
| 586 | <p>2fiaA<br/>(157)</p> <p>lufhB<br/>(154)</p> | C | 14.94 | <p><b>TM-align:</b> aliSize=136 (resi) RMSD=3.22 (Å)<br/> MKTRVADEK-LPMI-QFLTeVKAY-MDvv-GIT-Q-----TK-DYP-SQG-DIOEDITK--KRYYLV--HEmF-SMATFCMFOO--DFVWLKR-FATSPN-IAKGYGSLLFHELEKRAVWE-RRKMYAOTNHT-NHRMIRFF-SKGF-TKIHESlqmnrldfgsfylyvkele--<br/> IMLTPMQTE-FRSY-TYTT-KHY-aEE--kVKAgTwpedaQILSKqVFTdLLPRGLEtpHHLWSLkInEK-DIVGWLWIHAPEHPqQEAFIYDGLYEPYRGKGYAKQALAA-DOA-RSM-IRKLSLHVFAHQTARKLYEQTGEQETDVVM-----SK-----kl</p> <p><b>SARST:</b> aliSize=122 (resi) RMSD=5.29 (Å)<br/> mki rvadekelpm-----LLOFLTevKAYMDVVG-iTQWTKDypsOGDIOEDITK-----KRLYLLVHE--EMF-SMATFCMFOO--DFVWLKR-FATSPN-IAKGYGSLLFHELEKRAVWE-RRKMYAOTNHT-NHRMIRFF-SKGF-TKIHESLQ--mnrldfgsfylyvkele<br/> -----imltpmqteefrsyLYTTTKHYAEEKVKAG--TVLPE--DAQLLSKQVFTdLLprgletpHHLWSLkInEK-DIVGWLWIHAPEHPqQEAFIYDGLYEPYRGKGYAKQALAA-DOA-RSM-IRKLSLHVFAHQTARKLYEQTGEQETDVVMskkl-----</p> <p><b>BLAST:</b> aliSize=25 (resi) iden=10.39% (16/154) simi=16.23% (25/154)<br/> mki rvadekelpmi lqfltevkaymdvvgitqwtkdypsagdiqedittkrlyllvheemifsmatfcme-----imltpmqteefrsyltytkhyaeekvkagtwlpedaql lskqvftdLLprgletpHHLWSLkInEK-DIVGWLWIHAPEHPqQEAFIYDGLYEPYRGKGYAKQALAA-DOA-RSM<br/> RRKMYAOTNHT-NHRMIRFF-SKGF-----tkihESlqmnrldfgsfylyvkele<br/> IRKLSLHVFAHQTARKLYEQTGEQETDVVMskkl-----</p> <p><b>Proposed:</b> aliSize=131 (resi) RMSD=2.43 (Å)<br/> MKTRVADEK-LPMI-QFLTeVKAYMDVVG-iTQWTKDypsOGDIOEDITK--KRYYLV--HEmF-SMATFCMFOO--DFVWLKR-FATSPN-IAKGYGSLLFHELEKRAVWE-RRKMYAOTNHT-NHRMIRFF-SKGF-TKIHESlqmnrlLdFgsfylyvkele<br/> IMLTPMQTE-FRSY-TYTTk--HYa---E---EkvKAgTwpeda-QILSKqVFTdLLPRGLEtpHHLWSLkInEK-DIVGWLWIHAPEHPqQEAFIYDGLYEPYRGKGYAKQALAA-DOA-RSM-IRKLSLHVFAHQTARKLYEQTGEQETDVVM-----V-M-SKkl-----</p>                                                                                                                                                                                                                                    |
| 587 | <p>2fl4A<br/>(147)</p> <p>lqsmD<br/>(152)</p> | N | 12.24 | <p><b>TM-align:</b> aliSize=112 (resi) RMSD=3.08 (Å)<br/> gmeihfekvtsdnrkavenl-----Vfa-EqqAFIESMAENLKESDQF-----PEWESAGIYDG--NOLIGYAMYGRWOD-----GRVWLDRLFIQRFQGGYYKAACRLLMLKLIIEKYQNKLYLSVYDTSSAIRLYQQLGFVFNGLDNGermvewthq---<br/> -----sednitrfrvtendkegwrlwksyD--YE--VS-FPDDLDFNFRGLDpnIKMWA-AVAVESsEKIIGMINFFNHMTtwdfkdKIYINDLYVDENSRVKCAAGKLIQFVYDEADK-LGTPSVWCTDES-NHRAQLYVKVGYKAPKIlykrkgy-----kgy</p> <p><b>SARST:</b> aliSize=120 (resi) RMSD=11.19 (Å)<br/> gmei-----HFEEKVSDNRKAVENlqvfaeQAFIESMA-----ENLKESDQFPEW-ESAGIYDG--NOLIGYAMYGRWODG-----RVWLDRLFIQRFQGGYYKAACRLLMLKLIIEKYQNKLYLSVYDTSSAIRLYQQLGFVFN-----geldtngermvewthq<br/> -----sednitrfrvtendkegwrlwksyD--YE--VS-FPDDLDFNFRGLDpnIKMWA-AVAVESsEKIIGMINFFNHMTtwdfkdKIYINDLYVDENSRVKCAAGKLIQFVYDEADK-LGTPSVWCTDES-NHRAQLYVKVGYKAPKIlykrkgy-----</p> <p><b>BLAST:</b> aliSize=61 (resi) iden=17.01% (25/147) simi=41.50% (61/147)<br/> gmeihfek-----VSDNRKAVENlqvfaeQAFIESMA-----ENLKESDQFPEW-ESAGIYDG--NOLIGYAMYGRWODG-----RVWLDRLFIQRFQGGYYKAACRLLMLKLIIEKYQNKLYLSVYDTSSAIRLYQQLGFVFN-----vfgeldtngermvewthq<br/> -----sednitrfrvtendkegwrlwksyD--YE--VS-FPDDLDFNFRGLDpnIKMWA-AVAVESsEKIIGMINFFNHMTtwdfkdKIYINDLYVDENSRVKCAAGKLIQFVYDEADK-LGTPSVWCTDES-NHRAQLYVKVGYKAPKIlykrkgy-----</p> <p><b>Proposed:</b> aliSize=127 (resi) RMSD=2.33 (Å)<br/> -GMEHFEEKVSDNRKAVENlqvfaeQAFIESMA-----ENLKESDQFPEW-ESAGIYDG--NOLIGYAMYGRWODG-----GRVWLDRLFIQRFQGGYYKAACRLLMLKLIIEKYQNKLYLSVYDTSSAIRLYQQLGFVFNGLDNGermvewthq<br/> sEDNITVRFRVTENDKEGWRLWksyD--YE--VS-FPDDLDFNFRGLDpnIKMWA-AVAVESsEKIIGMINFFNHMTtwdfkdKIYINDLYVDENSRVKCAAGKLIQFVYDEADK-LGTPSVWCTDES-NHRAQLYVKVGYKAPKIlykrkgya-----</p>                                                                                                                                                                                                                                                 |

|     |                                             |   |       |                                                                                                                                                                                                                                                                                                                                                                                                                                                                                                                                                                                                                                                                                                                                                                                                                                                                                                                                                                                                                                                                                                                                                                                                                                                                                                                                                                                                                                                                                                                                                                                                                                                                                                                   |
|-----|---------------------------------------------|---|-------|-------------------------------------------------------------------------------------------------------------------------------------------------------------------------------------------------------------------------------------------------------------------------------------------------------------------------------------------------------------------------------------------------------------------------------------------------------------------------------------------------------------------------------------------------------------------------------------------------------------------------------------------------------------------------------------------------------------------------------------------------------------------------------------------------------------------------------------------------------------------------------------------------------------------------------------------------------------------------------------------------------------------------------------------------------------------------------------------------------------------------------------------------------------------------------------------------------------------------------------------------------------------------------------------------------------------------------------------------------------------------------------------------------------------------------------------------------------------------------------------------------------------------------------------------------------------------------------------------------------------------------------------------------------------------------------------------------------------|
| 588 | <p>2fl4A (147)</p> <hr/> <p>lqsmD (152)</p> | C | 9.52  | <p><b>TM-align:</b> aliSize=112 (resi) RMSD=3.08 (Å)<br/> gmeihfekvtsdnrkavenl-----VFa-fqqAFIESMAENLKESDQF----PEWESAGIYDG--NOLICYAMYGRWOD----GRVWLDRLIDORFOGQGYKAACRLMLKLIeKqTNKLYLSVYDTNSSAIRLYQQLgFVFNGLDtnGermwethq---<br/> -----sednitvrfvtendkegwqrllwksyDF-y--VS-FPDDLDFNFRGfIdpnIKMWAAVAVESssEKIIGMINFFNHMTtwdfkDKIYINDLYVDENSRVKCAAGKLIQFVYDEADK-LGTPSVWCTDES HRAQLYVKV-GYKAPKIYKR-----kgy</p> <p><b>SARST:</b> aliSize=120 (resi) RMSD=11.19 (Å)<br/> gmei----HFEEKVSDNRKAVENlqvfaeQQAfIESMA-----ENLKESDQFPEW-ESAGIYDG--NOLICYAMYGRWODG----RVWLDRLIDORFOGQGYKAACRLMLKLIeKqTNKLYLSVYDTNSSAIRLYQQLGFVN-----geLdtngermewthq<br/> ----sednitVRFVTENDKEGWQR-----LWKSyQDFYevsfpddldDFNFRGFLDpIkMWAAVAVESssEKIIGMINFFNHMTtwdfkdKIYINDLYVDENSRVKCAAGKLIQFVYDEADKLG-TPSVWCTDES HRAQLYVKVGYKAPKIlykrkgy-----</p> <p><b>BLAST:</b> aliSize=61 (resi) iden=17.01% (25/147) simi=41.50% (61/147)<br/> gmeihfek-----VSDNRKAVENlqvFAEQQAfIESMAENLKESD--QF--PE--ESAGIYDGNQ-LICYAMY----GRVWLDRLIDORFOGQGYKAACRLMLKLIeKqTNKLYLSVYDTNSSAIRLYQQLGF-----vfngelDtngermewthq<br/> -----sednitvrfvtendkegwqrllwksyQDFYevsFPDDLDFNFRGfIdpIkMWAAVAVESSEKIGMINFFnhmTtwdfkDKIYINDLYVDENSRVKCAAGKLIQFVYDE-ADLGTTPSVWCTDES HRAQLYVKVGYkAPKIlykrkgy-----</p> <p><b>Proposed:</b> aliSize=109 (resi) RMSD=2.29 (Å)<br/> gmeihfekvtsdnrkavenlqvfaeqqaf-----I-eSM-----AENLKESDQF----PEWESAGIYDG--NOLICYAMYGRWOD----GRVWLDRLIDORFOGQGYKAACRLMLKLIeKqTNKLYLSVYDTNSSAIRLYQQLGFVFNGLDtnGERVM-ewthq<br/> -----sednitvrfvtendkegwqrllwksyqdfyevsfpDDLDFNFRGfIdpnIKMWAAVAVESssEKIIGMINFFNHMTtwdfkDKIYINDLYVDENSRVKCAAGKLIQFVYDEADK-LGTPSVWCTDES HRAQLYVKVGYKAPKIlykrkgy-----</p>                                                                  |
| 589 | <p>2fl4A (147)</p> <hr/> <p>lufhA (155)</p> | N | 14.97 | <p><b>TM-align:</b> aliSize=110 (resi) RMSD=3.21 (Å)<br/> gmeihfekvtsd-----NRKAVENlqvfaeqqafi-----Esm--AE-NLKESDQFPEWESAGIYDGN-OLICYAMYGRWODG--RVWLDRLIDORFOGQGYKAACRLMLKLIeKqTNKLYLSVYDTNSSAIRLYQQLGFVNGLDtnGERmewthq---<br/> -----timltpmqteefrsyltyttkhyaeekVKAGTWLP-----edaqllsk--qvFTdLPRGLETPHHHLWSLKLNEkDIVGWLWIHAEPeHppqEAFIYDGLYEPYRCKGYAKQALAA-DQAARSMG-IRKLSLHFAHNOTARKLYEITGEQET-DV---VM-----skkl</p> <p><b>SARST:</b> aliSize=108 (resi) RMSD=4.21 (Å)<br/> gmeihfekvtsdnrkavenlqvfaeq-----QAFTIESMAENLKES--DOFPEWESAGIYDGNOLICYAMYGR---WODGRVWLDRLIDORFOGQGYKAACRLMLKLIeKqTNKLYLSVYDTNSSAIRLYQQLGFVNGLDtnGERmewthq<br/> -----timltpmqteefrsyltyttkhyaeekvkagtwlpedaQLLSKQVFTDLLPrgLETPHHHLWSLKLNEkDIVGWLWIHAEPeHPQOEAFIYDGLYEPYRCKGYAKQALAA-DQAARSMG-IRKLSLHFAHNOTARKLYEITGEQETDVMskkl-----<br/> wthq<br/> ----</p> <p><b>BLAST:</b> aliSize=54 (resi) iden=19.05% (28/147) simi=36.73% (54/147)<br/> gmeihfekvtsdnrkav-----NLFVFAEQQAfIESMAENLKESDQFPEWESAGIYDGNOLICYAMYGRWODGRVWLDRLI-----ORFOGQGYKAACRLMLKLIeKqTNKLYLSVYDTNSSAIRLYQQLGF-----vfngeldtnger<br/> -----timltpmqteefrsyltyttkhyaeekvkagtwlpedaQLLSKQVFTDLLPrgLETPHHHLWSLKLNEkDIVGWLWIHAEPeHPQOEAFIYDGLYEPYRCKGYAKQALAA-DQAARSMG-IRKLSLHFAHNOTARKLYEITGEQETDVMskkl-----<br/> vmewthq<br/> -----</p> <p><b>Proposed:</b> aliSize=126 (resi) RMSD=2.47 (Å)<br/> GmEIHFEKVSdNRKAVENLQ-VF--AFO-----Q-----afIeSMAENLKES--E-sDOFPEWESAGIYDGN-OLICYAMYGRWODGRVWLDRLI-----ORFOGQGYKAACRLMLKLIeKqTNKLYLSVYDTNSSAIRLYQQLGFVNGLDtnGERmewthq<br/> T-IMLTPMQTE-EFRSYLTYTtkhyaEekvkagtwlpedaql-Ls-KOVFT-DIIPrg-LETPHHHLWSLKLNEkDIVGWLWIHAEPe-HppqOEAFIYDGLYEPYRCKGYAKQALAA-DQAARSMG-IRKLSLHFAHNOTARKLYEITGEQET-DV---Vmskkl-----</p>                  |
| 590 | <p>2fl4A (147)</p> <hr/> <p>lufhA (155)</p> | C | 14.97 | <p><b>TM-align:</b> aliSize=110 (resi) RMSD=3.21 (Å)<br/> gmeihfekvtsd-----NRKAVENlqvfaeqqafi-----Esm--AE-NLKESDQFPEWESAGIYDGN-OLICYAMYGRWODG--RVWLDRLIDORFOGQGYKAACRLMLKLIeKqTNKLYLSVYDTNSSAIRLYQQLGFVNGLDtnGERmewthq---<br/> -----timltpmqteefrsyltyttkhyaeekVKAGTWLP-----edaqllsk--qvFTdLPRGLETPHHHLWSLKLNEkDIVGWLWIHAEPeHppqEAFIYDGLYEPYRCKGYAKQALAA-DQAARSMG-IRKLSLHFAHNOTARKLYEITGEQET-DV---VM-----skkl</p> <p><b>SARST:</b> aliSize=108 (resi) RMSD=4.21 (Å)<br/> gmeihfekvtsdnrkavenlqvfaeq-----QAFTIESMAENLKES--DOFPEWESAGIYDGNOLICYAMYGR---WODGRVWLDRLIDORFOGQGYKAACRLMLKLIeKqTNKLYLSVYDTNSSAIRLYQQLGFVNGLDtnGERmewthq<br/> -----timltpmqteefrsyltyttkhyaeekvkagtwlpedaQLLSKQVFTDLLPrgLETPHHHLWSLKLNEkDIVGWLWIHAEPeHPQOEAFIYDGLYEPYRCKGYAKQALAA-DQAARSMG-IRKLSLHFAHNOTARKLYEITGEQETDVMskkl-----<br/> wthq<br/> ----</p> <p><b>BLAST:</b> aliSize=54 (resi) iden=19.05% (28/147) simi=36.73% (54/147)<br/> gmeihfekvtsdnrkav-----NLFVFAEQQAfIESMAENLKESDQFPEWESAGIYDGNOLICYAMYGRWODGRVWLDRLI-----ORFOGQGYKAACRLMLKLIeKqTNKLYLSVYDTNSSAIRLYQQLGF-----vfngeldtnger<br/> -----timltpmqteefrsyltyttkhyaeekvkagtwlpedaQLLSKQVFTDLLPrgLETPHHHLWSLKLNEkDIVGWLWIHAEPeHPQOEAFIYDGLYEPYRCKGYAKQALAA-DQAARSMG-IRKLSLHFAHNOTARKLYEITGEQETDVMskkl-----<br/> vmewthq<br/> -----</p> <p><b>Proposed:</b> aliSize=105 (resi) RMSD=1.80 (Å)<br/> gmeihfekvtsdn-----R--KA-V-enL-----qvfaeqqafiesmaen---lke--SDQFPEWESAGIYDGN-OLICYAMYGRWODGRVWLDRLI-----ORFOGQGYKAACRLMLKLIeKqTNKLYLSVYDTNSSAIRLYQQLGFVNGLDtnGER<br/> -----timltpmqteefrsyltyttkhyaeekvkagtwlpedaql-ls-kvft-DIIPrg-LETPHHHLWSLKLNEkDIVGWLWIHAEPe-HppqOEAFIYDGLYEPYRCKGYAKQALAA-DQAARSMG-IRKLSLHFAHNOTARKLYEITGEQET-DV-----DV<br/> VMEWTHq<br/> VMSKKL-</p> |

|     |                                                     |   |       |                                                                                                                                                                                                                                                                                                                                                                                                                                                                                                                                                                                                                                                                                                                                                                                                                                                                                                                                                                                                                                                                                                                                                                                                                                                                                                                                                                                                                                                                                                                                                                                                                                                                                                |
|-----|-----------------------------------------------------|---|-------|------------------------------------------------------------------------------------------------------------------------------------------------------------------------------------------------------------------------------------------------------------------------------------------------------------------------------------------------------------------------------------------------------------------------------------------------------------------------------------------------------------------------------------------------------------------------------------------------------------------------------------------------------------------------------------------------------------------------------------------------------------------------------------------------------------------------------------------------------------------------------------------------------------------------------------------------------------------------------------------------------------------------------------------------------------------------------------------------------------------------------------------------------------------------------------------------------------------------------------------------------------------------------------------------------------------------------------------------------------------------------------------------------------------------------------------------------------------------------------------------------------------------------------------------------------------------------------------------------------------------------------------------------------------------------------------------|
| 591 | <p>2fl4A<br/>(147)</p> <hr/> <p>lufhB<br/>(154)</p> | N | 14.29 | <p><b>TM-align:</b> aliSize=113 (resi) RMSD=3.39 (Å)<br/> gmeihfekvtsd-----N-RKAVeNLOvfa--EqqAfi--ESm-AE-NLKESDOFPEWESAGTYDG-NOLICYAMYGRWODG---RVWLDRLIDORFOCOGYGAA-CRLMLKLIKLYqTNKLYSYDTSSAIRLYOOLGFVFNgELdtnGermewthq----<br/> -----imltpmqteefrsyltyttkhyaeekVkaGTW-LPE---daQ--L--lsKQ-vFTdLLPRGLETPHHHLWSLKLNeKDIVGWLWIHAEPeHpqqEAFIYDGLYEPYRCKGYAKQALAA-DQAARSMG-IRKLSLHFAHNOTARKLYEQTGFQET-DV---VM-----skkl</p> <p><b>SARST:</b> aliSize=125 (resi) RMSD=11.41 (Å)<br/> gmei-HFEKVTSDNRKAVENlqvfaEQOAFLESMA-----ENLKESDOFPE-----WESAGIYDGNOLICYAMYGRWOD---GRVWLDRLIDORFOCOGYGAA-CRLMLKLIKLYqTNKLYSYDTSSAIRLYOOLGFVFNGLD-----tngervmewthq<br/> ----iMLTPMOTEEFRSYLT-----YTTKHyaEEKvkagtwlpedaqlISKQVFTDLLPRGLETPHHHLWSLKLNeKDIVGWLWIHAEPeHpqqEAFIYDGLYEPYRCKGYAKQALAA-DQAA-RSMGIRKLSLHFAHNOTARKLYEQTGFQETDVMskkl-----</p> <p><b>BLAST:</b> aliSize=54 (resi) iden=19.05% (28/147) simi=36.73% (54/147)<br/> gmeihfekvtsdnrkav-----NLOVFAEQaAIESMAENLKESDOFPEWESAGTYDG-NOLICYAMYGRWODGRVWLDRLID---ORFOCOGYGAA-CRLMLKLIKLYqTNKLYSYDTSSAIRLYOOLGF-----vfgeldtngerv<br/> -----imltpmqteefrsyltyttkhyaeekvkagtwlpEDAQLLSKQ-VFTDLLPRGLETPHHHLWSLKLNeKDIVGWLWIHAEPeHPQEAFTYDfglyEPYRCKGYAKQALAA-D-QAARSMGIRKLSLHFAHNOTARKLYEQTGFqetdvmskkl-----<br/> mewthq<br/> -----</p> <p><b>Proposed:</b> aliSize=127 (resi) RMSD=2.56 (Å)<br/> gMEIHFEKVTSDNRKAVENLQ-VF--AQO---Q---aF---TESMAENLK--E--sDOFPEWESAGTYDG-NOLICYAMYGRW---OD-GRVWLDRLIDORFOCOGYGAA-CRLMLKLIKLYqTNKLYSYDTSSAIRLYOOLGFVFNgELdtnG-----ermewthq<br/> -iMLTPMOTEEFRSYLT-----YTTKHyaEEKvkagtwlpedaqlLSKQVFT-DIIPrg-LETTPHHHLWSLKLNeKDIVGWLWIHAEPeHPQEAFTYDGLYEPYRCKGYAKQALAA-DQAARSMG-IRKLSLHFAHNOTARKLYEQTGFQET-DV---Vmskkl-----</p> |
| 592 | <p>2fl4A<br/>(147)</p> <hr/> <p>lufhB<br/>(154)</p> | C | 13.61 | <p><b>TM-align:</b> aliSize=113 (resi) RMSD=3.39 (Å)<br/> gmeihfekvtsd-----N-RKAVeNLOvfa--EqqAfi--ESm-AE-NLKESDOFPEWESAGTYDG-NOLICYAMYGRWODG---RVWLDRLIDORFOCOGYGAA-CRLMLKLIKLYqTNKLYSYDTSSAIRLYOOLGFVFNgELdtnGermewthq----<br/> -----imltpmqteefrsyltyttkhyaeekVkaGTW-LPE---daQ--L--lsKQ-vFTdLLPRGLETPHHHLWSLKLNeKDIVGWLWIHAEPeHpqqEAFIYDGLYEPYRCKGYAKQALAA-DQAARSMG-IRKLSLHFAHNOTARKLYEQTGFQET-DV---VM-----skkl</p> <p><b>SARST:</b> aliSize=125 (resi) RMSD=11.41 (Å)<br/> gmei-HFEKVTSDNRKAVENlqvfaEQOAFLESMA-----ENLKESDOFPE-----WESAGIYDGNOLICYAMYGRWOD---GRVWLDRLIDORFOCOGYGAA-CRLMLKLIKLYqTNKLYSYDTSSAIRLYOOLGFVFNGLD-----tngervmewthq<br/> ----iMLTPMOTEEFRSYLT-----YTTKHyaEEKvkagtwlpedaqlISKQVFTDLLPRGLETPHHHLWSLKLNeKDIVGWLWIHAEPeHpqqEAFIYDGLYEPYRCKGYAKQALAA-DQAA-RSMGIRKLSLHFAHNOTARKLYEQTGFQETDVMskkl-----</p> <p><b>BLAST:</b> aliSize=54 (resi) iden=19.05% (28/147) simi=36.73% (54/147)<br/> gmeihfekvtsdnrkav-----NLOVFAEQaAIESMAENLKESDOFPEWESAGTYDG-NOLICYAMYGRWODGRVWLDRLID---ORFOCOGYGAA-CRLMLKLIKLYqTNKLYSYDTSSAIRLYOOLGF-----vIngeldtngerv<br/> -----imltpmqteefrsyltyttkhyaeekvkagtwlpEDAQLLSKQ-VFTDLLPRGLETPHHHLWSLKLNeKDIVGWLWIHAEPeHPQEAFTYDfglyEPYRCKGYAKQALAA-D-QAARSMGIRKLSLHFAHNOTARKLYEQTGFqetdvmskkl-----<br/> mewthq<br/> -----</p> <p><b>Proposed:</b> aliSize=108 (resi) RMSD=2.14 (Å)<br/> gmeihfekvtsdnr-----KAVE---nL---qvfaeqqafieS---maE--N1KESDOFPEWESAGTYDG-NOLICYAMYGRW---OD-GRVWLDRLIDORFOCOGYGAA-CRLMLKLIKLYqTNKLYSYDTSSAIRLYOOLGFVIngeldtngervMEWTHQ-<br/> -----imltpmqteefrsyltyttkhyaeekVkaGTWlpedaqls-----KqvftDIL-PRGLETPHHHLWSLKLNeKDIVGWLWIHAEPeHPQEAFTYDGLYEPYRCKGYAKQALAA-DQAARSMG-IRKLSLHFAHNOTARKLYEQTGFQETDVMskkl-----</p>       |
| 593 | <p>2fl4A<br/>(147)</p> <hr/> <p>lvkaA<br/>(149)</p> | N | 11.56 | <p><b>TM-align:</b> aliSize=113 (resi) RMSD=3.19 (Å)<br/> gmeihfekvtsdnrkav-----ENLOVfa--EOQAFIESMAENLKESDOFPEWESAGTYDG--NOLICYAMYGRWQ---D-GRVWLDRLIDORFOCOGYGAAACLLMLKLIKLYqTNKLYSYDTSSAIRLYOOLGFVFNgELdtnGermewthq---<br/> -----eytvdgeeyieeikkldreisySvRFP--SYEEYBERH-BELFESLLSQ-GEHKFFVALNerSELLGHVWICITLdtvdYvKIAYIYDIEVVKWARGLGISALLKAEWAKER-GAKKIVRVEIDNP-AVKWWEERYKAR-AL--IME-----kpi</p> <p><b>SARST:</b> aliSize=128 (resi) RMSD=11.52 (Å)<br/> gmei-HFEKVTSDNRKAV-----ENLOVFAEQOAFIESMAENLKESDOFPEWESAGIYDGNOLICYAMYGRWODG---RVWLDRLIDORFOCOGYGAAACLLMLKLIKLYqTNKLYSYDTSSAIRLYOOLGFVFNGLD-----dtngervmewthq<br/> ----eYITVDGEEYIEEIKldreisySvRFPISYEEYBERHEELFESLLSQGKHKFFVALNerSELLGHVWICITLdtvdyvKIAYIYDIEVVKWARGLGISALLKAEWAKER-GAKKIVRVEIDNP-AVKWWEERYKARALImekpi-----</p> <p><b>BLAST:</b> aliSize=33 (resi) iden=11.56% (17/147) simi=22.45% (33/147)<br/> gmeihfekvtsdnrkavenlqvfaeqqafiesmaenlkESDqfpwesagiYDgnqIgyamygrwqd-----eytvdgeeyieeikkldreisySvRFPISYEEYBERHEELFESllsqgehkfvalnersellGHVWICITLdtvdyvKIAYIYDIEVVKWARGLGISALLKAEWAKER-GAKKIVRVEIDNP-AVKWWEERYKAR-AL--IME-----<br/> SYDTSSAIRLYOOLGF-----vfgeldtngervmewthq<br/> RVEIDNP-AVKWWEERYKARALImekpi-----</p> <p><b>Proposed:</b> aliSize=121 (resi) RMSD=2.56 (Å)<br/> GMEIHFEKVTSDNRKAVENLQ-VFAF--OQafI-----eS---maen-1KESDOFPEWESAGTYDG--NOLICYAMYGRWQ---D-GRVWLDRLIDORFOCOGYGAAACLLMLKLIKLYqTNKLYSYDTSSAIRLYOOLGFVFNgELdtnG-----ermewthq<br/> EYITVDGEE---YIEEIK-KLdreisySvRFPISYEEYBERHEE---Lf-ESLLSQ-GEHKFFVALNerSELLGHVWICITLdtvdyvKIAYIYDIEVVKWARGLGISALLKAEWAKER-GAKKIVRVEIDNP-AVKWWEERYKAR-AL--IME-----</p>                                                                                        |

|     |                                               |   |       |                                                                                                                                                                                                                                                                                                                                                                                                                                                                                                                                                                                                                                                                                                                                                                                                                                                                                                                                                                                                                                                                                                                                                                                                                                                                                                                                                                                                                                                                                                                                                                            |
|-----|-----------------------------------------------|---|-------|----------------------------------------------------------------------------------------------------------------------------------------------------------------------------------------------------------------------------------------------------------------------------------------------------------------------------------------------------------------------------------------------------------------------------------------------------------------------------------------------------------------------------------------------------------------------------------------------------------------------------------------------------------------------------------------------------------------------------------------------------------------------------------------------------------------------------------------------------------------------------------------------------------------------------------------------------------------------------------------------------------------------------------------------------------------------------------------------------------------------------------------------------------------------------------------------------------------------------------------------------------------------------------------------------------------------------------------------------------------------------------------------------------------------------------------------------------------------------------------------------------------------------------------------------------------------------|
| 594 | <p>2f14A<br/>(147)</p> <p>1vkcA<br/>(149)</p> | C | 12.93 | <p><b>TM-align:</b> aliSize=113 (resi) RMSD=3.19 (Å)<br/> gmeihfekvtsdnrkav-----ENLOVFAEQOAFIE-SMAENLKESDOPPEWESAGIYDGNOLIGYAMYGRWOD-----D-GRVWLDLDRFLIDORFOGOCYKAAACRLMLKLIeKYOTNKLYISVYDTNSSLIRLYOOLGFVFNgeLdtnGERvmewthq---<br/> -----eytividgeeyieeikkldreisySFVRFPISYEEYERHEELFESLLSQ-GEHKFFVALNerSELGHVWICITLdtvdyvkiAYIYDIEVVKWARGLIGSALLKAEWAKER-GAKKIVRVEIDNP-AVKWYEERIKAR-AL--IME-----kpi</p> <p><b>SARST:</b> aliSize=128 (resi) RMSD=11.52 (Å)<br/> gmei-HFEKVTSDNRKAV-----ENLOVFAEQOAFIE-SMAENLKESDOPPEWESAGIYDGNOLIGYAMYGRWOD-----RVWLDLDRFLIDORFOGOCYKAAACRLMLKLIeKYOTNKLYISVYDTNSSLIRLYOOLGFVFNgeLdtnGERvmewthq<br/> -----eYITVDGEEYIEEIKKLDREISYFVRFPISYEEYERHEELFESLLSQ-GEHKFFVALNerSELGHVWICITLdtvdyvkiAYIYDIEVVKWARGLIGSALLKAEWAKER-GAKKIVRVEIDNP-AVKWYEERIKARALIMEkpi-----</p> <p><b>BLAST:</b> aliSize=33 (resi) iden=11.56% (17/147) simi=22.45% (33/147)<br/> gmeihfekvtsdnrkavenlqvfaeqqafiesmaenlkesdqfpewesagi ydgnqligyamygrwqd-----eytividgeeyieeikkldreisyfvrfpisyeyeerheelfesllsqgehkffvalnersellGRVWLDLDRFLIDORFOGOCYKAAACRLMLKLIeKYOTNKLYISVYDTNSSLIRLYOOLGFVFNgeLdtnGERvmewthq<br/> -----RVEIDNP-AVKWYEERIKARALIMEkpi-----</p> <p><b>Proposed:</b> aliSize=110 (resi) RMSD=2.38 (Å)<br/> gmeihfekvtsdnrkave-----NLOVFAEQOAFIE-SMAENLKESDOPPEWESAGIYDGNOLIGYAMYGRWOD-----D-GRVWLDLDRFLIDORFOGOCYKAAACRLMLKLIeKYOTNKLYISVYDTNSSLIRLYOOLGFVFNgeLdtnGERVMWTHQ<br/> -----eytividgeeyieeikkldreisyFVRFPISYEEYERHEELFESLLSQ-GEHKFFVALNerSELGHVWICITLdtvdyvkiAYIYDIEVVKWARGLIGSALLKAEWAKER-GAKKIVRVEIDNP-AVKWYEERIKAR-AL--IME-----RALIMEKPI-</p> |
| 595 | <p>2f14A<br/>(147)</p> <p>1z4eA<br/>(150)</p> | N | 14.29 | <p><b>TM-align:</b> aliSize=117 (resi) RMSD=2.96 (Å)<br/> gmeihfekvtsdnrkave-----NLOVFAEQOAFIE-SMAENLKESDOPPEWESAGIYDGNOLIGYAMYGRWOD-----D-GRVWLDLDRFLIDORFOGOCYKAAACRLMLKLIeKYOTNKLYISVYDTNSSLIRLYOOLGFVFNgeLdtnGERvmewthq---<br/> -----hvtireategdleqmvhmladdvLGRKRERYEK-pLPvSYVRAFKEIKKDKNNLIVACNGEEIVGMLQVTFPTY1tyqgsWRATIEGVRTHSAARGOCIGSQLVCWATERAK-ERGCHLIQITTDKQRPDALRFNEOLGFKASHHEGL-KM-----hf</p> <p><b>SARST:</b> aliSize=128 (resi) RMSD=11.20 (Å)<br/> gmei-HFEKVTSDN-----RKAVENLqvfaeqqafiesmaenlkesdqfpewesagi ydgnqligyamygrwod-----RVWLDLDRFLIDORFOGOCYKAAACRLMLKLIeKYOTNKLYISVYDTNSSLIRLYOOLGFVFNgeLdtnGERVMWTHQ<br/> -----hvtireategdleqmvhmladdvLGRKReryekplpvsyvrafKEIKKDKNNLIVACNGEEIVGMLQVTFPTY1tyqgsWRATIEGVRTHSAARGOCIGSQLVCWATERAK-ERG-CHLIQITTDKQRPDALRFNEOLGFKASHHEGL-KMhf-----</p> <p><b>BLAST:</b> aliSize=31 (resi) iden=14.29% (21/147) simi=21.09% (31/147)<br/> gmeihfekvtsdnrkavenlqvfaeqqafiesmaenlkesdqfpewesagi ydgnqligyamygrwod-----hvtireategdleqmvhmladdvLGRKReryekplpvsyvrafKEIKKDKNNLIVACNGEEIVGMLQVTFPTY1tyqgsWRATIEGVRTHSAARGOCIGSQLVCWATERAK-ERG-CHLIQITTDKQRPDALRFNEOLGFKASHHEGL-KMhf-----</p> <p><b>Proposed:</b> aliSize=127 (resi) RMSD=2.49 (Å)<br/> GMEIHFEKVTSDNRKAVENLQVFAEQOAFIESMAENLKESDOPPEWESAGIYDGNOLIGYAMYGRWOD-----D-GRVWLDLDRFLIDORFOGOCYKAAACRLMLKLIeKYOTNKLYISVYDTNSSLIRLYOOLGFVFNgeLdtnGERVMWTHQ<br/> HVTIREATEGDLQVFAEQOAFIESMAENLKESDOPPEWESAGIYDGNOLIGYAMYGRWOD-----D-GRVWLDLDRFLIDORFOGOCYKAAACRLMLKLIeKYOTNKLYISVYDTNSSLIRLYOOLGFVFNgeLdtnGERVMWTHQ</p>                                            |
| 596 | <p>2f14A<br/>(147)</p> <p>1z4eA<br/>(150)</p> | C | 12.93 | <p><b>TM-align:</b> aliSize=117 (resi) RMSD=2.96 (Å)<br/> gmeihfekvtsdnrkave-----NLOVFAEQOAFIE-SMAENLKESDOPPEWESAGIYDGNOLIGYAMYGRWOD-----D-GRVWLDLDRFLIDORFOGOCYKAAACRLMLKLIeKYOTNKLYISVYDTNSSLIRLYOOLGFVFNgeLdtnGERvmewthq---<br/> -----hvtireategdleqmvhmladdvLGRKRERYEK-pLPvSYVRAFKEIKKDKNNLIVACNGEEIVGMLQVTFPTY1tyqgsWRATIEGVRTHSAARGOCIGSQLVCWATERAK-ERGCHLIQITTDKQRPDALRFNEOLGFKASHHEGL-KM-----hf</p> <p><b>SARST:</b> aliSize=128 (resi) RMSD=11.20 (Å)<br/> gmei-HFEKVTSDN-----RKAVENLqvfaeqqafiesmaenlkesdqfpewesagi ydgnqligyamygrwod-----RVWLDLDRFLIDORFOGOCYKAAACRLMLKLIeKYOTNKLYISVYDTNSSLIRLYOOLGFVFNgeLdtnGERVMWTHQ<br/> -----hvtireategdleqmvhmladdvLGRKReryekplpvsyvrafKEIKKDKNNLIVACNGEEIVGMLQVTFPTY1tyqgsWRATIEGVRTHSAARGOCIGSQLVCWATERAK-ERG-CHLIQITTDKQRPDALRFNEOLGFKASHHEGL-KMhf-----</p> <p><b>BLAST:</b> aliSize=31 (resi) iden=14.29% (21/147) simi=21.09% (31/147)<br/> gmeihfekvtsdnrkavenlqvfaeqqafiesmaenlkesdqfpewesagi ydgnqligyamygrwod-----hvtireategdleqmvhmladdvLGRKReryekplpvsyvrafKEIKKDKNNLIVACNGEEIVGMLQVTFPTY1tyqgsWRATIEGVRTHSAARGOCIGSQLVCWATERAK-ERG-CHLIQITTDKQRPDALRFNEOLGFKASHHEGL-KMhf-----</p> <p><b>Proposed:</b> aliSize=115 (resi) RMSD=2.37 (Å)<br/> gmeihfekvtsdnrkave-----NLOVFAEQOAFIESMAENLKESDOPPEWESAGIYDGNOLIGYAMYGRWOD-----D-GRVWLDLDRFLIDORFOGOCYKAAACRLMLKLIeKYOTNKLYISVYDTNSSLIRLYOOLGFVFNgeLdtnGERVMWTHQ<br/> -----hvtireategdleqmvhmladdvLGRKReryekplpvsyvrafKEIKKDKNNLIVACNGEEIVGMLQVTFPTY1tyqgsWRATIEGVRTHSAARGOCIGSQLVCWATERAK-ERGCHLIQITTDKQRPDALRFNEOLGFKASHHEGL-KMhf-----</p>                       |

|     |                |   |       |                                                                                                                                                                                                                                                                                                                                                                                                                                                                                                                                                                                                                                                                                                                                                                                                                                                                                                                                                                                                                                                                                                                                                                                                                                                                                                                                                                                                                            |
|-----|----------------|---|-------|----------------------------------------------------------------------------------------------------------------------------------------------------------------------------------------------------------------------------------------------------------------------------------------------------------------------------------------------------------------------------------------------------------------------------------------------------------------------------------------------------------------------------------------------------------------------------------------------------------------------------------------------------------------------------------------------------------------------------------------------------------------------------------------------------------------------------------------------------------------------------------------------------------------------------------------------------------------------------------------------------------------------------------------------------------------------------------------------------------------------------------------------------------------------------------------------------------------------------------------------------------------------------------------------------------------------------------------------------------------------------------------------------------------------------|
| 597 | 2fyxA<br>(130) | C | 33.08 | <p><b>TM-align:</b> aliSize=110 (resi) RMSD=1.47 (Å)<br/> ---MKKGRGYVYKLEYHLI WATKYRHQVLDDEVADGLKDI LRDIATQNGLELVALEVMPDYVHLLGATPOHVPDFVKALKGASARRMFSAPHLK-QPhwGGnLWNPSCYVLTVSehtraqiqqyienqhaa-----<br/> avLYSNHNVVY SCKYHIVWCPKYRRKVLVGAEMRLEKEIQEVAKELRVEI IEMQTDKDHIIHADIDSFVGMKFKTAKGRSSILRQENHLKTKL--PT-LWTNSCFISTVGG-----gaplnvkvqyienqgn</p> <p><b>SARST:</b> aliSize=109 (resi) RMSD=2.13 (Å)<br/> m----KGRGYVYKLEYHLI WATKYRHQVLDDEVADGLKDI LRDIATQNGLELVALEVMPDYVHLLGATPOHVPDFVKALKGASARRMFSAPHLKqPhwGGnLWNPSCYVLTVS-----ehtraqiqqyienqhaa<br/> -avLYSNHNVVY SCKYHIVWCPKYRRKVLVGAEMRLEKEIQEVAKELRVEI IEMQTDKDHIIHADIDSFVGMKFKTAKGRSSILRQENHLKTKL--KTKLPTLWNTNSCFISTVGGaplnvkvqyienqgn-----</p> <p><b>BLAST:</b> aliSize=68 (resi) iden=33.08% (43/130) simi=52.31% (68/130)<br/> m----KGRGYVYKLEYHLI WATKYRHQVLDDEVADGLKDI LRDIATQNGLELVALEVMPDYVHLLGATPOHVPDFVKALKGASARRMFSAPHLKQPhwGGnLWNPSCYVLTVSEHTRAQIQOYIENQ--haa<br/> -avLYSNHNVVY SCKYHIVWCPKYRRKVLVGAEMRLEKEIQEVAKELRVEI IEMQTDKDHIIHADIDSFVGMKFKTAKGRSSILRQENHLKTKL--PTLWNTNSCFISTVGGAPLNVVKOYIENQqn---</p> <p><b>Proposed:</b> aliSize=127 (resi) RMSD=1.51 (Å)<br/> ---MKKGRGYVYKLEYHLI WATKYRHQVLDDEVADGLKDI LRDIATQNGLELVALEVMPDYVHLLGATPOHVPDFVKALKGASARRMFSAPHLKQPhwGGnLWNPSCYVLTVSEHTRAQIQOYIENQHaa<br/> avLYSNHNVVY SCKYHIVWCPKYRRKVLVGAEMRLEKEIQEVAKELRVEI IEMQTDKDHIIHADIDSFVGMKFKTAKGRSSILRQENHLKTKL-LPT-LWTNSCFISTVGGAPLNVVKOYIENQqn-</p> |
|     | 2a6mA<br>(130) |   |       |                                                                                                                                                                                                                                                                                                                                                                                                                                                                                                                                                                                                                                                                                                                                                                                                                                                                                                                                                                                                                                                                                                                                                                                                                                                                                                                                                                                                                            |
| 598 | 2fyxA<br>(130) | C | 40.00 | <p><b>TM-align:</b> aliSize=111 (resi) RMSD=1.68 (Å)<br/> --MKKGRGYVYKLEYHLI WATKYRHQVLDDEVADGLKDI LRDIATQNGLELVALEVMPDYVHLLGATPOHVPDFVKALKGASARRMFSAPHLK-QPhwGGnLWNPSCYVLTVSehtraqiqqyienqhaa-----<br/> meYKSTRHAKL LCNVHFVWIPKYRRKVL TGEVAEYTKVEVLR TLAELLCFVLALEVMPDHIHLFVNCPPRYAPSYLANFYKGSARLILKKQELKST--NCKLWTRSYFVSTSG-----nvssetikkyieeqwa</p> <p><b>SARST:</b> aliSize=123 (resi) RMSD=9.86 (Å)<br/> m---KGRGYVYKLEYHLI WATKYRHQVLDDEVADGLKDI LRDIATQNGLELVALEVMPDYVHLLGATPOHVPDFVKALKGASARRMFSAPHLKqPhwGGnLWNPSCYVLTVSEHTRAQIQOYIEN---qhaa<br/> -meyKSTRHAKL LCNVHFVWIPKYRRKVL TGEVAEYTKVEVLR TLAELLCFVLALEVMPDHIHLFVNCPPRYAPSYLANFYKGSARLILKKQELKST--KKSTNGKI WTRSYFVSTSGNVSETIKKYIEEqa----</p> <p><b>BLAST:</b> aliSize=73 (resi) iden=40.77% (53/130) simi=56.15% (73/130)<br/> m---KGRGYVYKLEYHLI WATKYRHQVLDDEVADGLKDI LRDIATQNGLELVALEVMPDYVHLLGATPOHVPDFVKALKGASARRMFSAPHLKQPhwGGnLWNPSCYVLTVSEHTRAQIQOYIENHaa<br/> -meyKSTRHAKL LCNVHFVWIPKYRRKVL TGEVAEYTKVEVLR TLAELLCFVLALEVMPDHIHLFVNCPPRYA-PSYLANFYKGSARLILKKQELKST--NCKLWTRSYFVSTSGNVSETIKKYIEEqa-</p> <p><b>Proposed:</b> aliSize=127 (resi) RMSD=1.68 (Å)<br/> --MKKGRGYVYKLEYHLI WATKYRHQVLDDEVADGLKDI LRDIATQNGLELVALEVMPDYVHLLGATPOHVPDFVKALKGASARRMFSAPHLKQPhwGGnLWNPSCYVLT-VSeHTRAQIQOYIENQHaa<br/> meYKSTRHAKL LCNVHFVWIPKYRRKVL TGEVAEYTKVEVLR TLAELLCFVLALEVMPDHIHLFVNCPPRYAPSYLANFYKGSARLILKKQELKST--NCKLWTRSYFVSTSGNVSETIKKYIEEqa-</p> |
|     | 2ec2A<br>(130) |   |       |                                                                                                                                                                                                                                                                                                                                                                                                                                                                                                                                                                                                                                                                                                                                                                                                                                                                                                                                                                                                                                                                                                                                                                                                                                                                                                                                                                                                                            |
| 599 | 2fyxA<br>(130) | C | 34.13 | <p><b>TM-align:</b> aliSize=112 (resi) RMSD=1.71 (Å)<br/> -MKKGRGYVYKLEYHLI WATKYRHQVLDDEVADGLKDI LRDIATQNGLELVALEVMPDYVHLLGATPOHVPDFVKALKGASARRMFSAPHLKQPhwGGnLWNPSCYVLTVSehtraqiqqyienqhaa-----<br/> 1YKSNHNVVY SCKYHIVWCPKYRRKVLVGAEMRLEKEIQEVAKELRVEI IEMQTDKDHIIHADIDSFVGMKFKTAKGRSSILRQENHLKTKL--KTKLPTLWNTNSCFISTVGG-----aplnvkvqyienq</p> <p><b>SARST:</b> aliSize=115 (resi) RMSD=7.72 (Å)<br/> m---KGRGYVYKLEYHLI WATKYRHQVLDDEVADGLKDI LRDIATQNGLELVALEVMPDYVHLLGATPOHVPDFVKALKGASARRMFSAPHLKqPhwGGnLWNPSCYVLTVS----EHTRAQIQOYIENqhaa<br/> -lyKSNHNVVY SCKYHIVWCPKYRRKVLVGAEMRLEKEIQEVAKELRVEI IEMQTDKDHIIHADIDSFVGMKFKTAKGRSSILRQENHLKTKL--KTKLPTLWNTNSCFISTVGGaplnvkvqyienq-----</p> <p><b>BLAST:</b> aliSize=68 (resi) iden=34.13% (43/126) simi=53.97% (68/126)<br/> m---KGRGYVYKLEYHLI WATKYRHQVLDDEVADGLKDI LRDIATQNGLELVALEVMPDYVHLLGATPOHVPDFVKALKGASARRMFSAPHLKQPhwGGnLWNPSCYVLTVSEHTRAQIQOYIENqhaa<br/> -lyKSNHNVVY SCKYHIVWCPKYRRKVLVGAEMRLEKEIQEVAKELRVEI IEMQTDKDHIIHADIDSFVGMKFKTAKGRSSILRQENHLKTKL--PTLWNTNSCFISTVGGAPLNVVKOYIENQ---</p> <p><b>Proposed:</b> aliSize=125 (resi) RMSD=1.42 (Å)<br/> -MKKGRGYVYKLEYHLI WATKYRHQVLDDEVADGLKDI LRDIATQNGLELVALEVMPDYVHLLGATPOHVPDFVKALKGASARRMFSAPHLKQPhwGGnLWNPSCYVLTVSEHTRAQIQOYIENQHaa<br/> 1YKSNHNVVY SCKYHIVWCPKYRRKVLVGAEMRLEKEIQEVAKELRVEI IEMQTDKDHIIHADIDSFVGMKFKTAKGRSSILRQENHLKTKL--KTKLPTLWNTNSCFISTVGGAPLNVVKOYIENQ---</p>              |
|     | 2vhgA<br>(126) |   |       |                                                                                                                                                                                                                                                                                                                                                                                                                                                                                                                                                                                                                                                                                                                                                                                                                                                                                                                                                                                                                                                                                                                                                                                                                                                                                                                                                                                                                            |



|     |                                               |   |       |                                                                                                                                                                                                                                                                                                                                                                                                                                                                                                                                                                                                                                                                                                                                                                                                                                                                                                                                                                                                                                                                                                                                                                                                                                                                                                                                                                                                                                                                                           |
|-----|-----------------------------------------------|---|-------|-------------------------------------------------------------------------------------------------------------------------------------------------------------------------------------------------------------------------------------------------------------------------------------------------------------------------------------------------------------------------------------------------------------------------------------------------------------------------------------------------------------------------------------------------------------------------------------------------------------------------------------------------------------------------------------------------------------------------------------------------------------------------------------------------------------------------------------------------------------------------------------------------------------------------------------------------------------------------------------------------------------------------------------------------------------------------------------------------------------------------------------------------------------------------------------------------------------------------------------------------------------------------------------------------------------------------------------------------------------------------------------------------------------------------------------------------------------------------------------------|
| 600 | <p>2fyxA<br/>(130)</p> <p>2vihA<br/>(151)</p> | C | 30.00 | <p><b>TM-align:</b> aliSize=112 (resi) RMSD=1.72 (Å)<br/> --MKGRGYVKLEYHLI WATKYRHQVLVDEADGKDLRDIATQNGLELVALEVMPDYVHLLGATPOHVIPDFVVALKGAASARRMFSAPHLKQPhWGGnLNPSYCVLTVS-Ehtraqiqyienqhaa-----<br/> v1YKSNHNVVY SCKYHIVWCPKYRRKVLVGAEMRKEIIOEVAKELRVEIIEMOTDKDHIHILADIDSFVGMKFIKTAKGRSSRIILROEENHLTK-LPT-LWTNSCFISTVGGaP-----lnvkvqyienqnsnrpkqkekwsyvdnlqtka1</p> <p><b>SARST:</b> aliSize=122 (resi) RMSD=7.62 (Å)<br/> m---KGRGYVKLEYHLI WATKYRHQVLVDEADGKDLRDIATQNGLELVALEVMPDYVHLLGATPOHVIPDFVVALKGAASARRMFSAPHLKqPhWGGNLNPSYCVLTVSEHTRAQIQQYIEN-----qhaa<br/> -vlyKSNHNVVY SCKYHIVWCPKYRRKVLVGAEMRKEIIOEVAKELRVEIIEMOTDKDHIHILADIDSFVGMKFIKTAKGRSSRIILROEENHLTK-LPT-LWTNSCFISTVGGAPLNVVKQYIENqnsnrpkqkekwsyvdnlqtka1----</p> <p><b>BLAST:</b> aliSize=68 (resi) iden=33.08% (43/130) simi=52.31% (68/130)<br/> m---KGRGYVKLEYHLI WATKYRHQVLVDEADGKDLRDIATQNGLELVALEVMPDYVHLLGATPOHVIPDFVVALKGAASARRMFSAPHLKQPhwgNLPNSYCVLTVSEHTRAQIQQYIENQ-----haa<br/> -vlyKSNHNVVY SCKYHIVWCPKYRRKVLVGAEMRKEIIOEVAKELRVEIIEMOTDKDHIHILADIDSFVGMKFIKTAKGRSSRIILROEENHLTKL--PTLWNSCFISTVGGAPLNVVKQYIENqnsnrpkqkekwsyvdnlqtka1---</p> <p><b>Proposed:</b> aliSize=126 (resi) RMSD=1.54 (Å)<br/> --MKGRGYVKLEYHLI WATKYRHQVLVDEADGKDLRDIATQNGLELVALEVMPDYVHLLGATPOHVIPDFVVALKGAASARRMFSAPHLKQPhWGGnLNPSYCVLTVS-EHTRAQIQQYIENQH-----aa<br/> v1YKSNHNVVY SCKYHIVWCPKYRRKVLVGAEMRKEIIOEVAKELRVEIIEMOTDKDHIHILADIDSFVGMKFIKTAKGRSSRIILROEENHLTK-LPT-LWTNSCFISTVGGAPLNVVKQYIENQnsnrpkqkekwsyvdnlqtka1--</p> |
| 601 | <p>2fyxA<br/>(130)</p> <p>2vihB<br/>(129)</p> | C | 33.33 | <p><b>TM-align:</b> aliSize=112 (resi) RMSD=1.70 (Å)<br/> --MKGRGYVKLEYHLI WATKYRHQVLVDEADGKDLRDIATQNGLELVALEVMPDYVHLLGATPOHVIPDFVVALKGAASARRMFSAPHLKQPhWGGnLNPSYCVLTVS-Ehtraqiqyienqhaa-----<br/> v1YKSNHNVVY SCKYHIVWCPKYRRKVLVGAEMRKEIIOEVAKELRVEIIEMOTDKDHIHILADIDSFVGMKFIKTAKGRSSRIILROEENHLTK-LPT-LWTNSCFISTVGGaP-----lnvkvqyienqqn</p> <p><b>SARST:</b> aliSize=122 (resi) RMSD=7.64 (Å)<br/> m---KGRGYVKLEYHLI WATKYRHQVLVDEADGKDLRDIATQNGLELVALEVMPDYVHLLGATPOHVIPDFVVALKGAASARRMFSAPHLKqPhWGGNLNPSYCVLTVSEHTRAQIQQYIEN-----qhaa<br/> -vlyKSNHNVVY SCKYHIVWCPKYRRKVLVGAEMRKEIIOEVAKELRVEIIEMOTDKDHIHILADIDSFVGMKFIKTAKGRSSRIILROEENHLTK-LPT-LWTNSCFISTVGGAPLNVVKQYIENqqn----</p> <p><b>BLAST:</b> aliSize=68 (resi) iden=33.33% (43/129) simi=52.71% (68/129)<br/> m---KGRGYVKLEYHLI WATKYRHQVLVDEADGKDLRDIATQNGLELVALEVMPDYVHLLGATPOHVIPDFVVALKGAASARRMFSAPHLKQPhwgNLPNSYCVLTVSEHTRAQIQQYIENQ-----haa<br/> -vlyKSNHNVVY SCKYHIVWCPKYRRKVLVGAEMRKEIIOEVAKELRVEIIEMOTDKDHIHILADIDSFVGMKFIKTAKGRSSRIILROEENHLTKL--PTLWNSCFISTVGGAPLNVVKQYIENqqn---</p> <p><b>Proposed:</b> aliSize=125 (resi) RMSD=1.51 (Å)<br/> --MKGRGYVKLEYHLI WATKYRHQVLVDEADGKDLRDIATQNGLELVALEVMPDYVHLLGATPOHVIPDFVVALKGAASARRMFSAPHLKQPhWGGnLNPSYCVLTV-SEHTRAQIQQYIENQH-aa<br/> v1YKSNHNVVY SCKYHIVWCPKYRRKVLVGAEMRKEIIOEVAKELRVEIIEMOTDKDHIHILADIDSFVGMKFIKTAKGRSSRIILROEENHLTK-LPT-LWTNSCFISTVgG-APLNVVKQYIENQn--</p>                                                                                     |
| 602 | <p>2fyxA<br/>(130)</p> <p>2vjvA<br/>(125)</p> | C | 33.60 | <p><b>TM-align:</b> aliSize=111 (resi) RMSD=1.66 (Å)<br/> MKRG-RGYVKLEYHLI WATKYRHQVLVDEADGKDLRDIATQNGLELVALEVMPDYVHLLGATPOHVIPDFVVALKGAASARRMFSAPHLKQPhWGGnLNPSYCVLTVSehtraqiqyienqhaa-----<br/> LYKSNHNVVY SCKYHIVWCPKYRRKVLVGAEMRKEIIOEVAKELRVEIIEMOTDKDHIHILADIDSFVGMKFIKTAKGRSSRIILROEENHLTK-LPT-LWTNSCFISTVgG-----gaplnvkvqyien</p> <p><b>SARST:</b> aliSize=110 (resi) RMSD=2.47 (Å)<br/> m---KGRGYVKLEYHLI WATKYRHQVLVDEADGKDLRDIATQNGLELVALEVMPDYVHLLGATPOHVIPDFVVALKGAASARRMFSAPHLKqPhWGGNLNPSYCVLTVSE-----htraqiqyienqhaa<br/> -lyKSNHNVVY SCKYHIVWCPKYRRKVLVGAEMRKEIIOEVAKELRVEIIEMOTDKDHIHILADIDSFVGMKFIKTAKGRSSRIILROEENHLTK-LPT-LWTNSCFISTVGGAPlnvkvqyien-----</p> <p><b>BLAST:</b> aliSize=67 (resi) iden=33.60% (42/125) simi=53.60% (67/125)<br/> m---KGRGYVKLEYHLI WATKYRHQVLVDEADGKDLRDIATQNGLELVALEVMPDYVHLLGATPOHVIPDFVVALKGAASARRMFSAPHLKQPhwgNLPNSYCVLTVSEHTRAQIQQYIENqhaa<br/> -lyKSNHNVVY SCKYHIVWCPKYRRKVLVGAEMRKEIIOEVAKELRVEIIEMOTDKDHIHILADIDSFVGMKFIKTAKGRSSRIILROEENHLTKL--PTLWNSCFISTVGGAPLNVVKQYIEN-----</p> <p><b>Proposed:</b> aliSize=122 (resi) RMSD=1.58 (Å)<br/> --MKGRGYVKLEYHLI WATKYRHQVLVDEADGKDLRDIATQNGLELVALEVMPDYVHLLGATPOHVIPDFVVALKGAASARRMFSAPHLKQPhWGGnLNPSYCVLTV--SehTRAQIQQYIENqhaa<br/> 1YKSNHNVVY SCKYHIVWCPKYRRKVLVGAEMRKEIIOEVAKELRVEIIEMOTDKDHIHILADIDSFVGMKFIKTAKGRSSRIILROEENHLTK-LPT-LWTNSCFISTVggA--PLNVVKQYIEN-----</p>                                                                                                   |

|     |                                                                                                          |   |                                                                                                                                                                                                                                                                                                                                                                                                                                                                                                                                                                                                                                                                                                                                                                                                                                                                                                                                                                                                                                                                                                                                                                                                                                                                                                                                                                                                                                                                                                                                                                                                                                                                                                                                                                                                                                                                                                                                                                                                                                                                                                                                                                                                                              |
|-----|----------------------------------------------------------------------------------------------------------|---|------------------------------------------------------------------------------------------------------------------------------------------------------------------------------------------------------------------------------------------------------------------------------------------------------------------------------------------------------------------------------------------------------------------------------------------------------------------------------------------------------------------------------------------------------------------------------------------------------------------------------------------------------------------------------------------------------------------------------------------------------------------------------------------------------------------------------------------------------------------------------------------------------------------------------------------------------------------------------------------------------------------------------------------------------------------------------------------------------------------------------------------------------------------------------------------------------------------------------------------------------------------------------------------------------------------------------------------------------------------------------------------------------------------------------------------------------------------------------------------------------------------------------------------------------------------------------------------------------------------------------------------------------------------------------------------------------------------------------------------------------------------------------------------------------------------------------------------------------------------------------------------------------------------------------------------------------------------------------------------------------------------------------------------------------------------------------------------------------------------------------------------------------------------------------------------------------------------------------|
| 603 | <p data-bbox="163 226 252 300">2g84A<br/>(189)</p> <p data-bbox="163 548 252 621">1wkqA<br/>(158)</p>    | C | <p data-bbox="468 136 2878 262"> <b>TM-align:</b> aliSize=120 (resi) RMSD=1.70 (Å)<br/>           mndalhiglpplvqanneprVLAAPFARMGYVLEVRANIAADGGPFAAVFrdSLLLIAATNRVPGRCSSAAHAHILALSLQAKIDTHDLSadglpAEVITSAEPCVMCFGAVISGVRSLVCAARSDDVEAIGFDE--GPR-PENwmggleargitvttellrdaacallreynacnviwn<br/>           -----HAMNHITFLKRAVTACEGVNIGIGPFGAVIVK--DAIIEEQNNITTSNDPTAHAEVTAIRKCKVIGAYQLD-----DIIYTSCEPCPMLGAIYARPkAVFYAAEHTAAEAAGFDDsfIYkeID-----<br/>           arc-----<br/>           ---kpaeertipfyqvtltehlsfpqawrnfankey         </p> <p data-bbox="468 283 2878 409"> <b>SARST:</b> aliSize=121 (resi) RMSD=5.79 (Å)<br/>           mndalhiglpplvqanneprvlaa---PARMGYVLEVRANIAADGGPFAAVFrdSLLLIAATNRVPGRCSSAAHAHILALSLQAKIDTHDLSadGLpacELVITSAEPCVMCFGAVISGVRSLVCAARSDDVEAIGFdegprpENWMGGLFARGIT-----<br/>           -----hamnhITFLKRAVTACEGVNIGIGPFGAVIVK--DAIIEEQNNITTSNDPTAHAEVTAIRKCKVIGAYQLD-----DC---IYTSCEPCPMLGAIYARPkAVFYAAEHTAAEAAGFDDsfIYkeIDKPaeertipfyqvtltehlsfpqawrn<br/>           -----vttgllrdaacallreynacnviwnarc<br/>           fankey-----         </p> <p data-bbox="468 430 2878 556"> <b>BLAST:</b> aliSize=53 (resi) iden=25.95% (41/158) simi=33.54% (53/158)<br/>           mndalhiglpplvqanneprvlaapearmgyvlelvrani-----ADGGPFAAVFrdSLLLIAATNRVPGRCSSAAHAHILALSLQAKIDthdLSADGLpacELVITSAEPCVMCFGAVISGVRSLVCAARSDDVEAIGFDE-----<br/>           -----hamnhITFLKRAVTACEGVNIGIGPFGAVIVK--DAIIEEQNNITTSNDPTAHAEVTAIRKCKVIGAYQLD-----DIIYTSCEPCPMLGAIYARPkAVFYAAEHTAAEAAGFDDsfIYkeIDkpaeertipfyqvtlteh<br/>           -----gprpenwmggleargitvtgllrdaacallreynacnviwnarc<br/>           lspfawrnfankey-----         </p> <p data-bbox="468 577 2878 703"> <b>Proposed:</b> aliSize=145 (resi) RMSD=1.44 (Å)<br/>           mndalhiglpplvqanneprvl--AAPARMGYVLEVRANIAADGGPFAAVFrdSLLLIAATNRVPGRCSSAAHAHILALSLQAKIDTHDLSadglpAEVITSAEPCVMCFGAVISGVRSLVCAARSDDVEAIGFDE-----gprPENWMGGLFARGITVTTGLrDAACALREYNACn<br/>           -----hamnhITFLKRAVTACEGVNIGIGPFGAVIVK--DAIIEEQNNITTSNDPTAHAEVTAIRKCKVIGAYQLD-----DIIYTSCEPCPMLGAIYARPkAVFYAAEHTAAEAAGFDDsfIYke---IDKPAE--RT--PFYQVT--TEHLSPFQAWRNf-<br/>           GV----iynarc<br/>           ANkkey-----         </p>                                     |
| 604 | <p data-bbox="163 873 252 947">2gbzA<br/>(179)</p> <p data-bbox="163 1194 252 1268">2pljB<br/>(171)</p>  | C | <p data-bbox="468 787 2878 913"> <b>TM-align:</b> aliSize=132 (resi) RMSD=3.21 (Å)<br/>           ndrLWIDLEMIGLTDRLSIEATIVTDAQ1NVLAAGPELAIAHSLITLEAMdewnRNOHRrsgLW-ORVLDsqVTHAOEAOTVAFLGwirAgASPmCGNSICORRFHROMS--R-ERyfhYRNLDVSTIKEL-ARRwa----PA-VASGFAKSSAhtalsdvrdsidelrhrvrafmetlge<br/>           --TFVLDFTTGLDPOVDEIEIGAVKIQGG-QIVDYHTLTKPS-REISRK---SSEITG---ITqEMLENK-RSIEEVLPEFLGL-----E-DIIVAHNANFYRFLRLWIKkvmgLDW--ERPYPITLALAKSLKLR-syldsvVEKLGPFRRH-----<br/>           -----<br/>           hralddarvtaqvflrfvemmkkeghh         </p> <p data-bbox="468 934 2878 1060"> <b>SARST:</b> aliSize=148 (resi) RMSD=13.11 (Å)<br/>           ndrLWIDLEMIGLTDRLSIEATIVTDAQ1NVLAAGPELAIAHSLITLEAMdewnRNOHRrsgLwq--RVLDSOVTHAOEAOTVAFLGwirAgASPmCGNSICORRFHRO-----MSRLERYFHYNLDVSTIKELARRwapavaSGFAKSSAHTALSDVRDSIDEIRHYROF<br/>           ---TFVLDFTTGLDPOVDEIEIGAVKIQGG-QIVDYHTLTKPSRE-ISR---KSSIEITG---ITqEMLENKRSTIEEVLPEFLGL-----EDSIIVAHNANFYRFLRLWIKkvmgldwerpyidTlALAKSLLKRSYSLDSVVEK-----GLGPFRRHRALDDARVTAQVFLRFVEMM<br/>           M-----gtlge<br/>           Kkeghh-----         </p> <p data-bbox="468 1081 2878 1207"> <b>BLAST:</b> aliSize=38 (resi) iden=15.79% (27/171) simi=22.22% (38/171)<br/>           ndrliw----LIDLEMIGLTDRLSIEATI-VTDAQL---NVLAAGPELAIAHSLITLEAMdewnRNOHRrsgLWORV----DSQVTHAOEAOTVAFLGwir-----agaspmcgnsi<br/>           ----TFVLDFTTGLDPOVDEIEIGAVKIQGG-QIVDYHTLTKPSRE-ISR---KSSIEITG---ITqEMLENKRSTIEEVLPEFLGL-----EDSIIVAHNANFYRFLRLWIKkvmgldwerpyidTlAlaksllkrsyslsvveklglgprhrhralddarvtaqvflrfvemmkkeghh-----<br/>           cqdrrflhrqmsrleryfhyrnlDvstikelarrwapavasgfakssahalsdvrdsidelrhrqfmgtlge         </p> <p data-bbox="468 1228 2878 1354"> <b>Proposed:</b> aliSize=134 (resi) RMSD=2.07 (Å)<br/>           ndrLWIDLEMIGLTDRLSIEATIVTDAQ1NVLAAGPELAIAHSLITLEAMdewnRNOHRrsgLW-ORVLDsqVTHAOEAOTVAFLGwirAgASPmCGNSICORRFHROMS----R-1ERYfhYRNLDVST-----ikelarrwapavasgfakssah<br/>           --TFVLDFTTGLDPOVDEIEIGAVKIQGG-QIVDYHTLTKPSRE-ISR---KSSIEITG---ITqEMLENK-RSIEEVLPEFLGL-----E-DIIVAHNANFYRFLRLWIKkvmgLD-WE--R-PYIITLAlaksllkrsyslsvveklglgprhrhra-----<br/>           IALSDIRDSIDELRHYROFMGTIGG-<br/>           DDARVTAQVFLRFVEMMKKEG-HHh         </p> |
| 605 | <p data-bbox="163 1528 252 1602">2gtvX<br/>(104)</p> <p data-bbox="163 1850 252 1923">1ecmA<br/>(91)</p> | N | <p data-bbox="468 1480 2878 1606"> <b>TM-align:</b> aliSize=77 (resi) RMSD=1.79 (Å)<br/>           mieklaeirkkideidnkilkarw-----PW--AE--KL--IAERNSLAKDAEINQLGPIINDPEREKYTYDRIRKCKEHNVDENIGIKIFORLIEHNKALIKOYEEtLeh<br/>           -----npllaireKIsalDekLLa1LAERRELAVEGKALLSHRVRIDRERDLERLITGAAHLLAHYITRLFOLIIEDSVLTQALQO-H--         </p> <p data-bbox="468 1627 2878 1753"> <b>SARST:</b> aliSize=85 (resi) RMSD=9.85 (Å)<br/>           mie---KLAERKKIDEIDNKILkarpwack1IAERNSLAKDAEINQLGPIINDPEREKYTYDRIRKCKEHNVDENIGIKIFORLIEHNKALIKOY---eetleh<br/>           ---nplLALREKISALDEKLLA-----LAERRELAVEGKALLSHRVRIDRERDLERLITGAAHLLAHYITRLFOLIIEDSVLTQALqqh-----         </p> <p data-bbox="468 1774 2878 1900"> <b>BLAST:</b> aliSize=53 (resi) iden=32.97% (30/91) simi=58.24% (53/91)<br/>           miek---AEIRKKIDEIDNKILkarpwack1IAERNSLAKDAEINQLGPIINDPEREKYTYDRIRKCKEHNVDENIGIKIFORLIEHNKALIKOYEE-tleh<br/>           ----nplLALREKISALDEKLLA-----LLAERRELAVEGKALLSHRVRIDRERDLERLITGAAHLLAHYITRLFOLIIEDSVLTQALQO-H----         </p> <p data-bbox="468 1921 2878 2047"> <b>Proposed:</b> aliSize=91 (resi) RMSD=1.20 (Å)<br/>           mieKLAERKKIDEIDNKILkarpwAek1IAERNSLAKDAEINQLGPIINDPEREKYTYDRIRKCKEHNVDENIGIKIFORLIEHNKALIKOYEEtLeh<br/>           --NPLALREKISALDEKLLA-----L--LAERRELAVEGKALLSHRVRIDRERDLERLITGAAHLLAHYITRLFOLIIEDSVLTQALQO-H--         </p>                                                                                                                                                                                                                                                                                                                                                                                                                                                                                                                                                                                                                                                                                                                                                                                                                                                  |

|     |                                                     |   |       |                                                                                                                                                                                                                                                                                                                                                                                                                                                                                                                                                                                                                                                                                                                                                                                                                                                                                                                                                                                                                                                                                                                                                                                                                                                                                                                                                                                                                                                                                                                                                                                                                                                                                                                                                                                                                                                          |
|-----|-----------------------------------------------------|---|-------|----------------------------------------------------------------------------------------------------------------------------------------------------------------------------------------------------------------------------------------------------------------------------------------------------------------------------------------------------------------------------------------------------------------------------------------------------------------------------------------------------------------------------------------------------------------------------------------------------------------------------------------------------------------------------------------------------------------------------------------------------------------------------------------------------------------------------------------------------------------------------------------------------------------------------------------------------------------------------------------------------------------------------------------------------------------------------------------------------------------------------------------------------------------------------------------------------------------------------------------------------------------------------------------------------------------------------------------------------------------------------------------------------------------------------------------------------------------------------------------------------------------------------------------------------------------------------------------------------------------------------------------------------------------------------------------------------------------------------------------------------------------------------------------------------------------------------------------------------------|
| 606 | <p>2gtvX<br/>(104)</p> <hr/> <p>lecmB<br/>(95)</p>  | N | 27.37 | <p><b>TM-align:</b> aliSize=80 (resi) RMSD=2.09 (Å)<br/> mieklaeirrkideidnkil <b>karw</b>-----PW--AE--KL--IAERNSLAKDVAEIKNQLGIPINDPEREKYTYDRIRKLCCKEHNVDENIGIKIFORLIEHNKALOKOYLEET--EH-<br/> -----pLlAlreKIsaLDekLLa<b>LAERRELA</b>VEVGKALLSHRPVRIDRERDRLERLITGGAHHLDAHITRFLQLIIEDSVLTQALQOHNkin</p> <p><b>SARST:</b> aliSize=90 (resi) RMSD=9.63 (Å)<br/> mie--KLAEIRKKIDEIDNKIL<b>karwpwaekli</b>AERNSLAKDVAEIKNQLGIPINDPEREKYTYDRIRKLCCKEHNVDENIGIKIFORLIEHNKALOKOYLEET---h<br/> ---pLLALREKISALDEKLLA<b>LAERRELA</b>VEVGKALLSHRPVRIDRERDRLERLITGGAHHLDAHITRFLQLIIEDSVLTQALQOHNkin-</p> <p><b>BLAST:</b> aliSize=54 (resi) iden=32.63% (31/95) simi=56.84% (54/95)<br/> mieklAEIRKKIDEIDNKIL<b>karwpwaekli</b>AERNSLAKDVAEIKNQLGIPINDPEREKYTYDRIRKLCCKEHNVDENIGIKIFORLIEHNKALOKOYLEET----eh<br/> ----pLLALREKISALDEKLLA<b>LAERRELA</b>VEVGKALLSHRPVRIDRERDRLERLITGGAHHLDAHITRFLQLIIEDSVLTQALQOHNkin--</p> <p><b>Proposed:</b> aliSize=93 (resi) RMSD=1.47 (Å)<br/> mieKLAERKKIDEIDNKIL<b>karwpwaekli</b>AERNSLAKDVAEIKNQLGIPINDPEREKYTYDRIRKLCCKEHNVDENIGIKIFORLIEHNKALOKOYLEET--EH--<br/> --PLALREKISALDEKLLA<b>LAERRELA</b>VEVGKALLSHRPVRIDRERDRLERLITGGAHHLDAHITRFLQLIIEDSVLTQALQOHNkin</p>                                                                                                                                                                                                                                                                                                                                                                                                                                                                                                                                                                                                                                                        |
| 607 | <p>2gtvX<br/>(104)</p> <hr/> <p>2h9dD<br/>(100)</p> | N | 16.00 | <p><b>TM-align:</b> aliSize=77 (resi) RMSD=2.26 (Å)<br/> mieklaeirrkideidnkil <b>karw</b>-----PW--AE--KL--IAERNSLAKDVAEIKNQLGIPINDPEREKYTYDRIRKLCCKEHNVDENIGIKIFORLIEHNKALOKOYLEET--LEh<br/> -----mktpedctgladireAldrIDIdI<b>VqalGRMDYVKAASRFKAS</b>---eAAIPAPERVAAMLPERARWAEENGLDAPFVEGLFAQIHWYIAEQIKYWRQrGA-</p> <p><b>SARST:</b> aliSize=83 (resi) RMSD=9.13 (Å)<br/> mieklAEIRKKIDEIDNKIL<b>karwpwaekli</b>AERNSLAKDVAEIKNQLGIPINDPEREKYTYDRIRKLCCKEHNVDENIGIKIFORLIEHNKALOKOYLEET----leh<br/> ----mktpedctglADIREADRIDLD<b>VQALGRMDYVKAASRFKaseaA</b>IPAPERVAAMLPERARWAEENGLDAPFVEGLFAQIHWYIAEQIKYWRQrGA---</p> <p><b>BLAST:</b> aliSize=44 (resi) iden=26.00% (26/100) simi=44.00% (44/100)<br/> mieklAEIRKKIDEIDNKIL<b>karwpwaekli</b>AERNSLAKDVAEIKNQLGIPINDPEREKYTYDRIRKLCCKEHNVDENIGIKIFORLIEHNKALOKOYLEET----leh<br/> ----mktpedctglADIREADRIDLD<b>VQA</b>-----LGRRMDYVKAASRFKaseaAIPAPERVAAMLPERARWAEENGLDAPFVEGLFAQIHWYIAEQIKYWRQrGA---</p> <p><b>Proposed:</b> aliSize=89 (resi) RMSD=1.69 (Å)<br/> mie-----KLAEIRKKIDEIDNKIL<b>karwpWA-ekli</b>AERNSLAKDVAEIKNqIqI--PINDPEREKYTYDRIRKLCCKEHNVDENIGIKIFORLIEHNKALOKOYLEET--LEh<br/> ---mktpedcTGLADIREADRIDLD<b>IV</b>---QA1---GRRMDYVKAASRFKaseaAIPAPERVAAMLPERARWAEENGLDAPFVEGLFAQIHWYIAEQIKYWRQrGA-</p>                                                                                                                                                                                                                                                                                                                                                                                                                                                                                                                                                                                 |
| 608 | <p>2i79A<br/>(171)</p> <hr/> <p>2fe7B<br/>(166)</p> | C | 19.28 | <p><b>TM-align:</b> aliSize=145 (resi) RMSD=3.16 (Å)<br/> -----MEYELIRENEPKDAELVAFLNRVSLDTFTSIDGDGILLTSHEMEIFLNKQASSDNOITLLAFLNCKIAIVNITADqRKR--VHIGDIFIVIGKRYWNNLCSLIEEAIWQNSGiLRRLOLTVQTRNOAVHLYOKHGFVIEGSOERG<b>ayieeg</b>kfidvylmgkli-----<br/> enlyfqGHMTIEIRPVVADAEQILAFIIEELAD-YER---ARHEVVTDVIGIRRSFAEGSPTRALMCLSECRPIYAVFYFYSYSTWLGNGIYEdLYVTPEIRGVACRRRLRELAREAVAND-CGRLEWSVLDWNQPAIDFIRSIALPQDEWVRY-----rldgealrkmae-----</p> <p><b>SARST:</b> aliSize=133 (resi) RMSD=4.71 (Å)<br/> m-----EYELIRENEPKDAELVAFLNRVSLDTFTSIDGDGILLTSHEMEIFLNKQASSDNOITLLAFLNCKIAIVNITADQQRKR--VHIGDIFIVIGKRYWNNLCSLIEEAIWQNSGiLRRLOLTVQTRNOAVHLYOKHGFVIEGSOERG<b>ayieeg</b>kfidvylmgkli-----<br/> -enlyfqGHMTIEIRPVVADAEQILAFIIEELADYERarHEVVTIV-----EGIRRSFAEGSPTRALMCLSECRPIYAVFYFYSYSTWLGNGIYEdLYVTPEIRGVACRRRLRELAREAVAND-CGRLEWSVLDWNQPAIDFIRSIALPQDEWVRY-----<br/> <b>eg</b>kfidvylmgkli</p> <p><b>BLAST:</b> aliSize=61 (resi) iden=22.29% (37/166) simi=36.75% (61/166)<br/> meyer-----LIRENEPKDAELVAFLNRVSLDTFTSIDGDGILLTSHEMEIFLNKQASSDNOITLLAFLNCKIAIVNITADQQRKR--VHIGDIFIVIGKRYWNNLCSLIEEAIWQNSGiLRRLOLTVQTRNOAVHLYOKHGFVIEGSOERG<b>ayieeg</b>kfidvylmgkli-----<br/> ----enlyfqGHMTIEIRPVVADAEQILAFIIEELADYERarHEVVTIV-----EGIRRSFAEGSPTRALMCLSECRPIYAVFYFYSYSTWLGNGIYEdLYVTPEIRGVACRRRLRELAREAVAND-CGRLEWSVLDWNQPAIDFIRSIALPQDEWVRY-----<br/> <b>ayieeg</b>kfidvylmgkli</p> <p><b>Proposed:</b> aliSize=144 (resi) RMSD=2.32 (Å)<br/> -----MEYELIRENEPKDAELVAFLNRVSLDTFTSIDGDGILLTSHEMEIFLNK-qAS-SdnQITLLAFLNCKIAIVNITADqqrkrV-----rHIGDIFIVIGKRYWNNLCSLIEEAIWQNSGiLRRLOLTVQTRNOAVHLYOKHGFVIEG--<b>saereayieeg</b>EGKFI---VY--LMg<br/> enlyfqGHMTIEIRPVVADAEQILAFIIEELADYER---ARHEVVTDVIGIRRSFAEGSPTRALMCLSECRPIYAVFYFYS---Ystwlgr-NGIYEdLYVTPEIRGVACRRRLRELAREAVAND-CGRLEWSVLDWNQPAIDFIRSIALPQDEWVRY-----VRYRLDgealRkmae-<br/> klia<br/> ----</p> |

|     |             |   |       |                                                                                                                                                                                                                                                                                                                                                                                                                                                                                                                                                                                                                                                                                                                                                                                                                                                                                                                                                                                                                                                                                                                                                                                                                                                                                                                                                                                                                                                                                                                                                                                                                                                                                                                                                                                                                    |
|-----|-------------|---|-------|--------------------------------------------------------------------------------------------------------------------------------------------------------------------------------------------------------------------------------------------------------------------------------------------------------------------------------------------------------------------------------------------------------------------------------------------------------------------------------------------------------------------------------------------------------------------------------------------------------------------------------------------------------------------------------------------------------------------------------------------------------------------------------------------------------------------------------------------------------------------------------------------------------------------------------------------------------------------------------------------------------------------------------------------------------------------------------------------------------------------------------------------------------------------------------------------------------------------------------------------------------------------------------------------------------------------------------------------------------------------------------------------------------------------------------------------------------------------------------------------------------------------------------------------------------------------------------------------------------------------------------------------------------------------------------------------------------------------------------------------------------------------------------------------------------------------|
| 609 | 2i9sA (97)  | C | 6.19  | <p><b>TM-align:</b> aliSize=77 (resi) RMSD=2.84 (Å)</p> <p>gpgkpesiLMTkKgKtLMMFVTVSGNptEKeteEITSLWQGS�fnANYDQRFIVG--SDRAIFMLRDGSIYAWElKDFIVSQ-----DRCAEVTLEQmypgk-----<br/> -----AEGDT-LI-SVDYEIfgkv--QGV--FfRKYTAEGK-KLGLVGWVQNTdqGTVOGQLOGPASKVRHMqEWLETKgspksHIDRASfHNEK-----vIvklDytdfqiVk</p> <p><b>SARST:</b> aliSize=73 (resi) RMSD=5.63 (Å)</p> <p>gpgkpesiLkmt--KKGKTLMMFVTVSGNPTEKETEEIISLWQGSIFnANYDQRFIVGSDRAIFMLRDGSIYAWElKDFIVSQDRCAEVTL-----eQmypgk<br/> -----aeGDTLISVDYEIfgkV--KVGvFFRKYTAEGK---LGLVGWVQNTDQGTVOGQLOGPASKVRHMqEWLETKGSPKSHIdrasfhnekvIvklDytdfqiVk-----</p> <p><b>BLAST:</b> aliSize=8 (resi) iden=6.19% (6/97) simi=8.25% (8/97)</p> <p>gpgkpesiLkmtkkgkLlmmfvTVsgnpteketeEITSWQGSIFnanydvqrFivgs-----DRAlfMLRDGSIYAWElKDFIVSQDRCAEVTLEQmypgk<br/> -----aegdtliSvdYEIfgkvqgvffRkytAegkklglvgwvqntdqgtvqglqgpaskvrhmqewleTKgspkshiDRASfHNEKVIvklDYtdfQIvK-----</p> <p><b>Proposed:</b> aliSize=80 (resi) RMSD=2.43 (Å)</p> <p>gpgkpesiLkmtKkGktLMMFVTVSGNptekETE-EITSLWQGSIFnANYDQRFIVGS--DRAIFMLRDGSIYAWElKDFIVSQ-----DRCAEVTLEQ-----QM-YPG-K-<br/> -----AEG--D-TL-LSVDYEIfgk-----VQGVFFRKYTAEGK-K-LGLVGWVQNTdqGTVOGQLOGPASKVRHMqEWLETKgspkshIDRASfHNEKVIvklDYtdfQIvK</p>                                                                                                                                                                                                                                                                                                                                                                                                                                                                                                                                                                                                        |
|     | 2acyA (98)  |   |       |                                                                                                                                                                                                                                                                                                                                                                                                                                                                                                                                                                                                                                                                                                                                                                                                                                                                                                                                                                                                                                                                                                                                                                                                                                                                                                                                                                                                                                                                                                                                                                                                                                                                                                                                                                                                                    |
| 610 | 2jevA (169) | C | 15.92 | <p><b>TM-align:</b> aliSize=137 (resi) RMSD=3.03 (Å)</p> <p>akFVIRPA-TAA--DCSDILRLIKELAKYEYME--OVILTEKDLEDFGfgehPFYH--CLVAEVPKehwtpeghSIVGFAMYY-FTYDP-WIGKLLYLEDFMMSDYRCFETIGSEIKNLSOVAMRCRCSSMHFLVAWNEPSTNFYKRRASDLSseeWRIFkidkeyllkmate-----<br/> -EIKTEKkLkLdkALNELIDVYMSGYEGLE-EGgeGRDYARNYIKWCW---KkASdgFFvAKvGD-----KIVGFIVCDkDWFSkyEGRIvGAiHEVVDKkFOCKGIGRKLITCLDFLGK-YNDTIELWGEKNYGAMNLYEKFFKKVg----KSGI-----wrmikrqnl</p> <p><b>SARST:</b> aliSize=108 (resi) RMSD=6.56 (Å)</p> <p>akfvirpat-----AADCSILRLIKELAKyemeeqviltEKDLEDFGfgehpfyhCLVAEVPkEHWtpEghSIVGFAMYY-FTYDPWIG--KLLYLEDFMMSDYRCFETIGSEIKnLSOVAMRCRCSSMHFLVAWNEPSTNFYKRRASD-----<br/> -----eikiekllkldkkaNelidvymSGyegleeyGGEGRDYARNYIKWC-----WKKASDG-----FFvAKvG--DK-----LVGFIVCDkDWFSkyEGRIvGAiHEVVDKkFOCKGIGRKLITCLDFLGKYNdtIELWGEKNYGAMNLYEKFFKKVgksgIwvrm</p> <p>-----sseeGwrlfkiDkeyllkmate<br/> ikrqnl-----</p> <p><b>BLAST:</b> aliSize=45 (resi) iden=14.65% (23/157) simi=28.66% (45/157)</p> <p>akfvirpataadcsdilrlikelakyeemeeqviltEKdlledfgehpfyhclvaeVpkEhwtpE-----eikiekllkldkkaNelidvymSGyegleeyggeGRDYARNYIKWCWkKASdgFFvAKvG-----HSIVGFAM-----YYFTDpwiKLL-YLED-FMMSDYRCFETIGSEIKNLSOVAMRCRCSSMH<br/> -----DKLVGFIVCDkDWFSkyEGRIvGAiHEVVDKkFOCKGIGRKLITCLDFLGKYN-DTIE</p> <p>FLVAWNEPSTNFYKRRASDLSSEEGR-LFN-----idkeyllkmate<br/> LWGEKNYGAMNLYEKFFKKVgKSGIwvrmikrqnl-----</p> <p><b>Proposed:</b> aliSize=138 (resi) RMSD=2.31 (Å)</p> <p>akFVIRPA-TAA--DCSDILRLIKELAKYE-eymEQ--V-IL-TekD--Lied-GfgehPFYH--CLVAEVPKehwtpeghSIVGFAMYY-FTYDP--WIGKLLYLEDFMMSDYRCFETIGSEIKNLSOVAMRCRCSSMHFLVAWNEPSTNFYKRRASDLS--seeGwrlfkiDKE-yllkmate<br/> -EIKTEKkLkLdkALNELIDVYMSGYEG1---EGgeGRDYAR--Nyik--WcW---KkASdgFFvAKvGD-----KIVGFIVCDkDWFSkyEGRIvGAiHEVVDKkFOCKGIGRKLITCLDFLGK-YNDTIELWGEKNYGAMNLYEKFFKKVgks-GIwvrmikrqnlA-----</p> |
|     | 1wwzB (157) |   |       |                                                                                                                                                                                                                                                                                                                                                                                                                                                                                                                                                                                                                                                                                                                                                                                                                                                                                                                                                                                                                                                                                                                                                                                                                                                                                                                                                                                                                                                                                                                                                                                                                                                                                                                                                                                                                    |
| 611 | 2jevA (169) | C | 18.34 | <p><b>TM-align:</b> aliSize=142 (resi) RMSD=3.09 (Å)</p> <p>akFVIRPATAADCSDIIRLIKELAKYEY--MEEOVILTEKDLEDFGfGfEHPPHCLVAEVPKehwtpeghSIVGFAMYYFT--YDPwIGKLLYLEDFMMSDYRCFETIGSEIKNLSOVAMRCRCSSMHFLVAWNEPSTNFYKRRASDLSseeGwrlfkiDkeyllkmate-----<br/> --ASIRDAGVADLPGLAAYNDAGNTTainW-TP-VDLANRQAWFDaRARQGPIVASDAA-----GEVLGYASGDWRPFGF-FRGTVEH-SVYRDRDQKGLVQLQAIEIRAQGLHVVAAIESGNAASIGLHRLFEISGQ--MPQVG-----qkgrwldltfmqnl</p> <p>dptersap</p> <p><b>SARST:</b> aliSize=134 (resi) RMSD=3.86 (Å)</p> <p>akfvirpataadcsdilrlikelakye-ymEEOVILTEKDLEDFGfGfEHPPHCLVAEVPkEhwtpEghSIVGFAMYY-FTYDPWIGKLLYLEDFMMSDYRCFETIGSEIKNLSOVAMRCRCSSMHFLVAWNEPSTNFYKRRASD-----sseeGwrlfkiDkeyllkmate<br/> ---ASIRDAGVADLPGLAAYNDAGNTTainWNETPVDLANRQAWFDaRARQGYPIVAS-----DAAE-VLGYASGDWRPFEGFRGTVEH-SVYRDRDQKGLVQLQAIEIRAQGLHVVAAIESGNAASIGLHRLFEISGmpqvqkfgwldltfmqnlDptersap-----</p> <p>lfkiDkeyllkmate<br/> -----</p> <p><b>BLAST:</b> aliSize=60 (resi) iden=23.08% (39/169) simi=35.50% (60/169)</p> <p>akfvirpataadcsdilrlikelakye---ymEEOVILTEKDLEDFGfGfEHPPHCLVAEVPkEhwtpEghSIVGFAMYY-FTYDPWIGKLLYLEDFMMSDYRCFETIGSEIKNLSOVAMRCRCSSMHFLVAWNEPSTNFYKRRASD-----asd<br/> -----ASIRDAGVADLPGLAAYNDAGNTTainWNETPVDLANRQAWFDARARQGYPIVAS-----SDAAGEVLGYASGDWRPFEGFRGTVEH-SVYRDRDQKGLVQLQAIEIRAQGLHVVAAIESGNAASIGLHRLFEISGmpqvqkfgwldltfmqnlDptersap-----</p> <p>sseeGwrlfkiDkeyllkmate<br/> -----</p> <p><b>Proposed:</b> aliSize=148 (resi) RMSD=2.29 (Å)</p> <p>akFVIRPATAADCSDIIRLIKELAKYEY---MEEOVILTEKDLEDFGfGfEHPPHCLVAEVPK-ehwtpeghSIVGFAMYYFT--YDPwiGKLLYLEDFMMSDYRCFETIGSEIKNLSOVAMRCRCSSMHFLVAWNEPSTNFYKRRASDLS--seeGwrlfkiDKEYLLkMATE<br/> --ASIRDAGVADLPGLAAYNDAGNTTainW-TP-VDLANRQAWFD--A-RarqyPIVASDAAg-----EVLYASGDWRPFGF--RGTVEH-SVYRDRDQKGLVQLQAIEIRAQGLHVVAAIESGNAASIGLHRLFEISGmpQVgkfgwldltfmqnlDPTER-SAP</p>     |
|     | 2j8mB (170) |   |       |                                                                                                                                                                                                                                                                                                                                                                                                                                                                                                                                                                                                                                                                                                                                                                                                                                                                                                                                                                                                                                                                                                                                                                                                                                                                                                                                                                                                                                                                                                                                                                                                                                                                                                                                                                                                                    |

|     |                                                                                                                         |   |       |                                                                                                                                                                                                                                                                                                                                                                                                                                                                                                                                                                                                                                                                                                                                                                                                                                                                                                                                                                                                                                                                                                                                                                                                                                                                                                                                                                                                                                                                                                                                                                                                                                                                                                                                                                                   |
|-----|-------------------------------------------------------------------------------------------------------------------------|---|-------|-----------------------------------------------------------------------------------------------------------------------------------------------------------------------------------------------------------------------------------------------------------------------------------------------------------------------------------------------------------------------------------------------------------------------------------------------------------------------------------------------------------------------------------------------------------------------------------------------------------------------------------------------------------------------------------------------------------------------------------------------------------------------------------------------------------------------------------------------------------------------------------------------------------------------------------------------------------------------------------------------------------------------------------------------------------------------------------------------------------------------------------------------------------------------------------------------------------------------------------------------------------------------------------------------------------------------------------------------------------------------------------------------------------------------------------------------------------------------------------------------------------------------------------------------------------------------------------------------------------------------------------------------------------------------------------------------------------------------------------------------------------------------------------|
| 612 | <div data-bbox="163 226 252 304">2jevA<br/>(169)</div> <hr/> <div data-bbox="163 546 252 623">2j8nA<br/>(169)</div>     | C | 18.34 | <p>TM-align: aliSize=141 (resi) RMSD=3.04 (Å)<br/> akfvLRPATAACSDLRRLIKELAKYEY--MEEQVILTEKDLLEDGFG--EHPFHCVAEVPKehwtpeghSIVGFMYFYTY--DPWIGKLIYLeDFFVMSYRGEFIISEIKNISOVMRCRCSSHFLVAEWNEPSINFYKRRASDLSSdeGWRIFkidkeyllkmate-----<br/> ---SRDAGVADLPGLAAYNDVAGNTTaitWNETPVDLANRQAWFDARARQGPIVASDAA-----GEVLCYASGDWRpfEG-FRGTVEH-SVYVRDQQRKQLVQLQAIIERARAQGLHVVAATIESGNAASIGLHRRLFEISGQ--MPQVG-----qkfgwrldlftmqlnl</p> <p>-----<br/> dptrsap</p> <p>SARST: aliSize=130 (resi) RMSD=3.40 (Å)<br/> akfvLRPATAACSDLRRLIKELAKYEY--MEEQVILTEKDLLEDGFG--EHPFHCVAEVPKehwtpeghSIVGFMYFYTY--DPWIGKLIYLeDFFVMSYRGEFIISEIKNISOVMRCRCSSHFLVAEWNEPSINFYKRRASDL-----ssee<br/> ---SRDAGVADLPGLAAYNDVAGNTTaitWNETPVDLANRQAWFDARARQGPIVASDAA-----GEVLCYASGDWRPFEGFRGTVEH-SVYVRDQQRKQLVQLQAIIERARAQGLHVVAATIESGNAASIGLHRRLFEISgmpqvgqkfgwrldlftmqlnldptrsap-----</p> <p>gwrllkidkeyllkmate<br/> -----</p> <p>BLAST: aliSize=60 (resi) iden=23.08% (39/169) simi=35.50% (60/169)<br/> akfvLRPATAACSDLRRLIKELAKYEY--MEEQVILTEKDLLEDGFG--EHPFHCVAEVPKehwtpeghSIVGFMYFYTY--DPWIGKLIYLeDFFVMSYRGEFIISEIKNISOVMRCRCSSHFLVAEWNEPSINFYKRRASDL-----ssee<br/> ---SRDAGVADLPGLAAYNDVAGNTTaitWNETPVDLANRQAWFDARARQGPIVASDAA-----GEVLCYASGDWRPFEGFRGTVEH-SVYVRDQQRKQLVQLQAIIERARAQGLHVVAATIESGNAASIGLHRRLFEISgmpqvgqkfgwrldlftmqlnldptrsap-----</p> <p>segwrllkidkeyllkmate<br/> -----</p> <p>Proposed: aliSize=147 (resi) RMSD=2.25 (Å)<br/> akfvLRPATAACSDLRRLIKELAKYEY--MEEQVILTEKDLLEDGFG--EHPFHCVAEVPKehwtpeghSIVGFMYFYTY--DPWIGKLIYLeDFFVMSYRGEFIISEIKNISOVMRCRCSSHFLVAEWNEPSINFYKRRASDLSSdeGWRIFkidkeyllkmate-----<br/> ---SRDAGVADLPGLAAYNDVAGNTTaitWNETPVDLANRQAWFDARARQGPIVASDAA-----GEVLCYASGDWRpfEG-FRGTVEH-SVYVRDQQRKQLVQLQAIIERARAQGLHVVAATIESGNAASIGLHRRLFEISGmp-QVGqkfgwrldlftmqlnldptrsap-----</p> |
| 613 | <div data-bbox="163 871 252 949">2ob0A<br/>(154)</div> <hr/> <div data-bbox="163 1190 252 1268">1s3zB<br/>(145)</div>   | C | 11.03 | <p>TM-align: aliSize=130 (resi) RMSD=2.35 (Å)<br/> skgsrTELGDVTPHNIKQLKRINQVIFVSY--N-DKFKYKDVLEVGE-LAKLAYFNDAVAVCCRVDISQ-----NQKRLYI-TLGCAPYRRLIGTKLNHVLNICEKDGTFDNIYLHVQISNESASIDFYRKFGEFIIITKKNYkriepadahlqknl----<br/> -----MDIRQMNKTHLEHWRGIRKQLWGHPPdAhLADGEEILQADhLASFIAMADGVAIGFADASIRhDyvngcdSSPVVFLGIFVPSFRQRCVAKQIIAAVQRWGT-NKGCRESMASDTSPEPTISQKVHQUALGFEETRVIFY-----rkrcc</p> <p>SARST: aliSize=126 (resi) RMSD=3.05 (Å)<br/> skgsriELGDVTPHNIKQLKRINQVIFVSYNDFYKIV-----LEVGE-LAKLAYFNDAVAVCCRVDISQ-----NQKRLYITLGCAPYRRLIGTKLNHVLNICEKDGTFDNIYLHVQISNESASIDFYRKFGEFIIITKK-----nykriepadahlqknl<br/> -----MDIRQMNKTHLEHWRGIRKQLWGHPPdAhLAHGeelQADhLASFIAMADGVAIGFADASIRhDyvngcdSSPVVFLGIFVPSFRQRCVAKQIIAAVQRWGT-NKGCRESMASDTSPEPTISQKVHQUALGFEETRVIFyrkrcc-----</p> <p>BLAST: aliSize=62 (resi) iden=18.62% (27/145) simi=42.76% (62/145)<br/> skgsrTELGDVTPHNIKQLKRINQVIFVSYNDFYKIV-----LEVGE-LAKLAYFNDAVAVCCRVDISQ-----NQKRLYITLGCAPYRRLIGTKLNHVLNICEKDGTFDNIYLHVQISNESASIDFYRKFGEFIIITKKNYKR-iepadahlqknl<br/> -----MDIRQMNKTHLEHWRGIRKQLWGHPPdAhLAHGeelQADhLASFIAMADGVAIGFADASIRhDyvngcdSSPVVFLGIFVPSFRQRCVAKQIIAAVQRWGT-NKGCRESMASDTSPEPTISQKVHQUALGFEETRVIFYKRCC-----</p> <p>Proposed: aliSize=132 (resi) RMSD=1.87 (Å)<br/> skgsrTELGDVTPHNIKQLKRINQVIFVSY--N-DKFKYKDVLEVGE-LAKLAYFNDAVAVCCRVDISQ-----NQKRLYITLGCAPYRRLIGTKLNHVLNICEKDGTFDNIYLHVQISNESASIDFYRKFGEFIIITKKNYkriepadahlqknl--a<br/> -----MDIRQMNKTHLEHWRGIRKQLWGHPPdAhLADGEEILQADhLASFIAMADGVAIGFADASIRhDyvngcdSSPVVFLGIFVPSFRQRCVAKQIIAAVQRWGT-NKGCRESMASDTSPEPTISQKVHQUALGFEETRVIFYKRCC-----</p>                                                                                                                                                                                                |
| 614 | <div data-bbox="163 1522 252 1600">2ob0A<br/>(154)</div> <hr/> <div data-bbox="163 1841 252 1919">1s5kA<br/>(153)</div> | C | 10.46 | <p>TM-align: aliSize=135 (resi) RMSD=2.66 (Å)<br/> ---SKSRIELGDVTPHNIKQLKRINQVIFVSY--N-DKFKYKDVLEVGE-LAKLAYFNDAVAVCCRVDISQ-----NQKRLYI-TLGCAPYRRLIGTKLNHVLNICEKDGTFDNIYLHVQISNESASIDFYRKFGEFIIITKKNYkriepadahlqknl----<br/> glvPRGSHMDIRQMNKTHLEHWRGIRKQLWGHPPdAhLADGEEILQADhLASFIAMADGVAIGFADASIRhDyvngcdSSPVVFLGIFVPSFRQRCVAKQIIAAVQRWGT-NKGCRESMASDTSPEPTISQKVHQUALGFEETRVIFY-----rkrcc</p> <p>SARST: aliSize=133 (resi) RMSD=3.45 (Å)<br/> s---KGSRIELGDVTPHNIKQLKRINQVIFVSYNDFYKIVL--EVGELAK--LAYFNDAVAVCCRVD--HSNQ---KRLYITLGCAPYRRLIGTKLNHVLNICEKDGTFDNIYLHVQISNESASIDFYRKFGEFIIITKK-----nykriepadahlqknl<br/> -glvPRGSHMDIRQMNKTHLEHWRGIRKQLWGHPPdAhLAHGeelQADhLASFIAMADGVAIGFADASIRhDyvngcdSSPVVFLGIFVPSFRQRCVAKQIIAAVQRWGT-NKGCRESMASDTSPEPTISQKVHQUALGFEETRVIFyrkrcc-----</p> <p>BLAST: aliSize=65 (resi) iden=19.08% (29/153) simi=42.76% (65/153)<br/> s---KGSRIELGDVTPHNIKQLKRINQVIFVSYNDFYKIVL--EVGELAK--LAYFNDAVAVCCRVD--HSNQ---KRLYITLGCAPYRRLIGTKLNHVLNICEKDGTFDNIYLHVQISNESASIDFYRKFGEFIIITKKNYKR-iepadahlqknl<br/> -glvPRGSHMDIRQMNKTHLEHWRGIRKQLWGHPPdAhLAHGeelQADhLASFIAMADGVAIGFADASIRhDyvngcdSSPVVFLGIFVPSFRQRCVAKQIIAAVQRWGT-NKGCRESMASDTSPEPTISQKVHQUALGFEETRVIFYKRCC-----</p> <p>Proposed: aliSize=136 (resi) RMSD=2.00 (Å)<br/> s---KGSRIELGDVTPHNIKQLKRINQVIFVSY--N-DKFKYKDVLEVGE-LAKLAYFNDAVAVCCRVDISQ-----NQKRLYITLGCAPYRRLIGTKLNHVLNICEKDGTFDNIYLHVQISNESASIDFYRKFGEFIIITKKnykriepadahlqknl-a<br/> -glvPRGSHMDIRQMNKTHLEHWRGIRKQLWGHPPdAhLADGEEILQADhLASFIAMADGVAIGFADASIRhDyvngcdSSPVVFLGIFVPSFRQRCVAKQIIAAVQRWGT-NKGCRESMASDTSPEPTISQKVHQUALGFEETRVIFYKRCC-----</p>                                                                                                                                                                             |

|     |                                                     |   |                                                                                                                                                                                                                                                                                                                                                                                                                                                                                                                                                                                                                                                                                                                                                                                                                                                                                                                                                                                                                                                                                                                                                                                                                                                                                                                                                                                                                                                                                                                                                                                                                                                                                                                                                                                                                                                                                                                                                                                                                                                                                                                                                                                                                                                                                                                                                                                                                                                                                                                                                                                                                                                                                                                   |
|-----|-----------------------------------------------------|---|-------------------------------------------------------------------------------------------------------------------------------------------------------------------------------------------------------------------------------------------------------------------------------------------------------------------------------------------------------------------------------------------------------------------------------------------------------------------------------------------------------------------------------------------------------------------------------------------------------------------------------------------------------------------------------------------------------------------------------------------------------------------------------------------------------------------------------------------------------------------------------------------------------------------------------------------------------------------------------------------------------------------------------------------------------------------------------------------------------------------------------------------------------------------------------------------------------------------------------------------------------------------------------------------------------------------------------------------------------------------------------------------------------------------------------------------------------------------------------------------------------------------------------------------------------------------------------------------------------------------------------------------------------------------------------------------------------------------------------------------------------------------------------------------------------------------------------------------------------------------------------------------------------------------------------------------------------------------------------------------------------------------------------------------------------------------------------------------------------------------------------------------------------------------------------------------------------------------------------------------------------------------------------------------------------------------------------------------------------------------------------------------------------------------------------------------------------------------------------------------------------------------------------------------------------------------------------------------------------------------------------------------------------------------------------------------------------------------|
| 615 | <p><b>2ob0A (154)</b></p> <p><b>2vbqA (147)</b></p> | C | <p>11.56</p> <p><b>TM-align:</b> aliSize=132 (resi) RMSD=2.52 (Å)<br/>       skgSRIELGDVTPHNIKQLKRINQVIFVSY--N-DKFKYKDVLEVG-ELAKLAFYNDIIVGAVCCRVD--SQ-----NQKRLYI-TLGCAPYRRLIGTKLNHVLNICEKDgTFDNIYLHVQISNESAIIDFYRKFGEIITKKNYkriepadahv qknl----<br/>       ---SHMDIROMNKTHLEHWGRKQLWGHPDdAhLADGEEIQADhLASFIAMADGVVIGFADASIRhDYvngcdSSPVVFLGFIIVLPSFQRQVAKQIIAAVQRWGTNK-GCREMASDTSPEPTISQKVHQALGFEETERVIFY-----rkrC</p> <p><b>SARST:</b> aliSize=129 (resi) RMSD=3.53 (Å)<br/>       skgsr--TELGDVTPHNIKQLKRINQVIFVSYN--DKFYKDVLEVGELAKLA--YFNDAVAVCCRVD--HSQN----QKRLYITLGCAPYRRLIGTKLNHVLNICEKDgTFDNIYLHVQISNESAIIDFYRKFGEIITK-----nyykriepadahv qknl<br/>       -----shMDIROMNKTHLEHWGRKQLWGHPDdaHLADGEEILOADHLASFIAMADGVVIGFADASIRhDYvngcdSSPVVFLGFIIVLPSFQRQVAKQIIAAVQRWGTNKGCCREMASDTSPEPTISQKVHQALGFEETERVIFYrkrC-----</p> <p><b>BLAST:</b> aliSize=63 (resi) iden=19.05% (28/147) simi=42.86% (63/147)<br/>       skgSRIELGDVTPHNIKQLKRINQVIFVSYNDFYK-----VLEVGELAK-LAFYNDIIVGAVCCRVD--SQ-----NQKRLYITLGCAPYRRLIGTKLNHVLNICEKDgTFDNIYLHVQISNESAIIDFYRKFGEIITKKNYKR-icepadahv qknl<br/>       ---SHMDIROMNKTHLEHWGRKQLWGHPDDAHLADGEEILOADHLASFIAMADGVVIGFADASIRhDYvngcdSSPVVFLGFIIVLPSFQRQVAKQIIAAVQRWGTNKGCCREMASDTSPEPTISQKVHQALGFEETERVIFYRKRc-----</p> <p><b>Proposed:</b> aliSize=134 (resi) RMSD=2.06 (Å)<br/>       skgSRIELGDVTPHNIKQLKRINQVIFVSY--YNDKFKYKDVLE--VgeLAKLAFYNDIIVGAVCCRVD--SQ-----nQKRLYITLGCAPYRRLIGTKLNHVLNICEKDgTFDNIYLHVQISNESAIIDFYRKFGEIITkknnyykriepadaHVLQKNL-a<br/>       ---SHMDIROMNKTHLEHWGRKQLWGHPDDAHLADGEEIQadhL--ASFIAMADGVVIGFADASIRhDYvngcds-SPVVFLGFIIVLPSFQRQVAKQIIAAVQRWGTNK-GCREMASDTSPEPTISQKVHQALGFEETRV-----VIFYRKRc-</p>                                                                                                                                                                                                                                                                                                                                                                                                                                                                                                                                                                                                                                                                                                                                                                                                                                                                                                                                                                                                                                  |
| 616 | <p><b>2pa4A (294)</b></p> <p><b>li52A (225)</b></p> | M | <p>15.11</p> <p><b>TM-align:</b> aliSize=208 (resi) RMSD=3.05 (Å)<br/>       --VKTIVVPAAGLITNPLPAtktvPKELIPVVDTPGIELIAAEAAELG-ATRLAITANKAGVLAHFERSseleetlmergktdqveiiirraADIKAVPTQdKP1GLGHAAGLAESVLDIdEDVAAMLPDDLVPPTGVMERMAOVRAEFGGSVLCVVEVSEADVSKygifeiadtkdsdvkkg<br/>       h1DVCAYPAAGFRRMQ-T-E-CPKOYSIGNQTILHSVHALLAHPPrKRVVVAISGDSRFAQLPLA-----NH-PQITVVDG-GD-ERADSVLAGLKAAG-AQWVLDHAARPCQHODDLARLLALSETSRGTGILNAPVSDTMKR-----</p> <p>mvekpA-----IEDAPS-RLAATGRYLLD-RKIFDARLI--TPGAggeLQLTADLLIdEgHPVHIHOGKRHDLGNFGGYIPCVDFGLshpvygaqlkdaikqilaheaa<br/>       -----aepgknaiAHTVDRngLWHLTPOFFPrELLHDCITAlneGAT1---TDEASALEYC--G-FHPQLVEGRADN1KVTRPEDLALFEYlTR-----</p> <p><b>SARST:</b> aliSize=207 (resi) RMSD=9.59 (Å)<br/>       vk----TVVPAAGLITNPLPAtktvPKELIPVVDTPGIELIAAEAAELG-ATRLAITANKAGVLAHFERSseleetlmerKTQDVeIIRRAAD-LIKAMPVTOQKPLGLGHVGLVESV1ddEDVAAMLPDDLVPPTGVMERMAOVRAE-----FQGSVLCVvevseadvskYGIIFEIADTKDS<br/>       --h1dvCAVPAAGFRRMQTE---CPKOYSIGNQTILHSVHALLAHPPrKRVVVAIS-----PDSRFA--QLPLNHPQITVVDGG-ERADSVLAGLKAAG--AQWVLDHAARPC--LHODDLARLLALSetsrTGILNAPV-----RDTMKRAIPGKNAT</p> <p>DVKKVGmvEKPaidapsRLAATGRYLLD-RKIFDALRR-----IPGAggeLqLtdAIDLIDEHPVHIHOGKRHDLGNFGGYIPCVDF--glshpvygaqlkdaikqilaheaa<br/>       AHTVDR---NGI-----WHLTPOFFPrELLHDCITAlneGAT1---TDEASALEYC--G-FHPQLVEGRADN1KVTRPEDLALFEYlTR-----</p> <p><b>BLAST:</b> aliSize=64 (resi) iden=16.44% (37/225) simi=28.44% (64/225)<br/>       vktv-----VPAAGLITNPLPAtktvPKELIPVVDTPGIELIAAEAAELG-ATRLAITANKAGVLAHFERSseleetlmerKTQDVeIIRRAAD-LIKAMPVTOQKPLGLGHVGLVESV1ddEDVAAMLPDDLVPPTGVMERMAOVRAEFGGSVLCVVEVSEADVSKYGIIFEIADTKDS<br/>       ---h1dvCAVPAAGFRRMQTE---CPKOYSIGNQTILHSVHALLAHPPrKRVVVAISGDSRFAQLPLANHPQITVVDGG--DE--PADSVLAGLKAAG-AQWVLDHAARPC--LHODDLARLLALSETSRGTGILNAPVSDTMKR-----RDTMKRAIPGKNAT</p> <p>cltralnegatiideasaleyegfhpqlvegradnikvtrpedlalaefyltr-----cavevseadvskygifeiadtkdsdvkkgmvekpaidapsllaatgrylldrkifdalrriitpgaggelqLtdaidllidegHPVHIHOGKRHDLGNFGGYIPacvdfglshpvygaqlkdaikqilaheaa</p> <p>aa<br/>       --</p> <p><b>Proposed:</b> aliSize=216 (resi) RMSD=2.27 (Å)<br/>       --VKTIVVPAAGLITNPLPAtktvPKELIPVVDTPGIELIAAEAAELG-ATRLAITANKAGVLAHFERSseleetlmergktdqveiiirraADIKAVPTQdKP1GLGHAAGLAESVLDIdEDVAAMLPDDLVPPTGVMERMAOVRAEFGGSVLCVVEVSEADVSKYGIIFEIADTKDS<br/>       h1DVCAYPAAGFRRMQ-T-E-CPKOYSIGNQTILHSVHALLAHPPrKRVVVAISGDSRFAQLPLA-----NH-PQITVVDG-GD-ERADSVLAGLKAAG-AQWVLDHAARPCQHODDLARLLALSETSRGTGILNAPV-----RDTMKRAIPGK-----NAIA</p> <p>GMVEKPAidapsRLAATGRYLLD-RKIFDARLI--TPGAggeLQLTADLLIdEgHPVHIHOGKRHDLGNFGGYIPCVDFGLshpvygaqlkdaikqilaheaa<br/>       HTVDRNG-----LWHLTPOFFPrELLHDCITAlneGAT1---TDEASALEYC--G-FHPQLVEGRADN1KVTRPEDLALFEYlTR-----</p> |
| 617 | <p><b>2pa7A (135)</b></p> <p><b>lj3qa (187)</b></p> | N | <p>15.56</p> <p><b>TM-align:</b> aliSize=95 (resi) RMSD=3.04 (Å)<br/>       enkvinfkkiidsrgslvaiecnknipf-----SIKRVYVIFDTKGE-----EPRGFHAKK--KLEQVLCVNCSCRVIDD-GNIIOEITLDSPaVGLVYGFVAVWEMHDFS-SDCVMVVASDYDeTD<br/>       -----mkykepfvgkldfetgiiENAKKSVRRLsdmkyfideeawkkmveegdpvvevyvayieeQeKeGDLNfATTVLYPKvgnefFMTKGYSKIDRAEYFALKKGGMLQTPeGEARFEMEPG-TIIVVPPYWAHRTINTGdKPFIFLALYPADAG--H</p> <p>YIROQ--DNKkyiakinle-----<br/>       DYGTIaeKGS-----kivveengkvvkdnpk</p> <p><b>SARST:</b> aliSize=89 (resi) RMSD=7.13 (Å)<br/>       enkvinfkkiids-----RGSILVAIENENKNIpfSikRVYVIFDTKGE-----EPRGFHAKK--KLEQVLCVNCSCRVIDD-GNIIOEITLDSPaVGLVYGFVAVWEMHDFS-SDCVMVLA-----<br/>       -----mkykepfvgkldfetgiiENAKKSVRRLsdmkyfideeawkkmveegdpvVEVYVAYieeQeKeGDLNfATTVLYPKvgnefFMTKGYSKIDRAEYFALKKGGMLQTPeGEARFEMEPG-TIIVVPPYWAHRTINTGdKPFIFLALypadagdygtiaekgfs</p> <p>-----sdydetdyirqydnfkkyiakinle<br/>       kivveengkvvkdnpk-----</p> <p><b>BLAST:</b> aliSize=21 (resi) iden=8.15% (11/135) simi=15.56% (21/135)<br/>       mkykepfvgkldfetgiiENAKKSVRRLsdmkyfideeawkkmveegdpvVEVYVAYieeQeKeGDLNfATTVLYPKvgnefFMTKGYSKIDRAEYFALKKGGMLQTPeGEARFEMEPG-TIIVVPPYWAHRTINTGdKPFIFLALypadagdygtiaekgfskiivveengkvvkdnpk--- fha<br/>       hkkleqvlvcngscrviiddgniiqeitldspavglygpavwhemhdfssdcvmmvlasdydetdyirqydnfkkyiakinle</p> <p><b>Proposed:</b> aliSize=113 (resi) RMSD=2.42 (Å)<br/>       e-----NKI-----IFNIIID-----SRGSLVAIENENKNIpfSikRVYVIFDTKGE-----EPRGFHAKK--LEQVLCVNCSCRVIDDGN-IOEITLDSPaVGLVYGFVAVWEMHDFS-SDCVMVVASDY-yDetDYIROQ--D-----<br/>       -mkykepfvgkldfetgiiENAKKSVRRLsdmkyfideeawkkmveegdpVVEVYVAYieeQeKe-----GDLNfATTVLYPKvgnefFMTKGYSKIDRAEYFALKKGGMLQTPeGEARFEMEPG-TIIVVPPYWAHRTINTGdKPFIFLALYPADAG--HDYGTIaeKgfskivveengk<br/>       -----nfkkyiakinle<br/>       vvkdnPk-----</p>                                                                                                                                                                                                                                                                                                                                                                                                                                                                                                                                                                                                                                                                                                                                                                                                                                                                                                          |

|     |                            |   |       |                                                                                                                                                                                                                                                                                                                                                                                                                                                                                                                                                                                                                                                                                                                                                                                                                                                                                                                                                                                                                                                                                                                                                                                                                                                                                                                                                                                                                                                                                                                                                                                                                                                                                                                                                                                                                                                        |
|-----|----------------------------|---|-------|--------------------------------------------------------------------------------------------------------------------------------------------------------------------------------------------------------------------------------------------------------------------------------------------------------------------------------------------------------------------------------------------------------------------------------------------------------------------------------------------------------------------------------------------------------------------------------------------------------------------------------------------------------------------------------------------------------------------------------------------------------------------------------------------------------------------------------------------------------------------------------------------------------------------------------------------------------------------------------------------------------------------------------------------------------------------------------------------------------------------------------------------------------------------------------------------------------------------------------------------------------------------------------------------------------------------------------------------------------------------------------------------------------------------------------------------------------------------------------------------------------------------------------------------------------------------------------------------------------------------------------------------------------------------------------------------------------------------------------------------------------------------------------------------------------------------------------------------------------|
| 618 | 2pa7A (135)<br>1j3rB (185) | N | 15.56 | <p><b>TM-align:</b> aliSize=96 (resi) RMSD=3.05 (Å)<br/>enkvnfkkidsrgslvaieenknip-----FSIKRVYIYFDTKGE-----EPRGFHAKK--LEOLVCLNNGSCRVIIDGNIIOEITLDSpaVGLYVGFVAVWEMHDFS-SDCVMMVLSADYYDeTDYIR<br/>-----ykepfgvkldfetgii enakksvrrlsdmkgyfideeawkkmveegdpvvyevyaveeekEGDLNFATTVLYPKvgnefFMTKGFHAKKIDRAEYFAFKKGGMLQTPGEARFIEMEPG-TIVVPPYWARTRINTGDKPFIFLAIPADAG--HDYG</p> <p>OY-DNFkkyiakindle-----<br/>TlaEKGF-----skivveengkvvkdnpk</p> <p><b>SARST:</b> aliSize=95 (resi) RMSD=7.21 (Å)<br/>enkvnfkkids-----RGSLSVAIENKNIPESIKRVYIYFDTKGE-----EPP--RGFHA--HKKLEOLVCLNNGSCRVIIDGNIIOEITLDSpaVGLYVGFVAVWEMHDFS-SDCVMMVLA-----<br/>-----ykepfgvkldfetgii enakksvrrlsdmkgyfideeawkkmveegdpvvyEVYVIEQEEKEGDLNFATTVLYPGKVINfFmTKGFHAKKIDRAEYFAFKKGGMLQTPGEARFIEMEPGTIVVPPYWARTRINTGDKPFIFLALypadaghdtygiaekgfskivveeng<br/>-----sdydetdyirqydnfkkyiakindle<br/>kvvkdnpk</p> <p><b>BLAST:</b> aliSize=21 (resi) iden=8.15% (11/135) simi=15.56% (21/135)<br/>-----nkvnfkkids-----RGSLSVAIENKNIPESIKRVYIYFDTKGE-----EPRGFHAKK--LEOLVCLNNGSCRVIIDGNIIOEITLDSpaVGLYVGFVAVWEMHDFS-SDCVMMVLSADYYDeTDYIR-----fhahk<br/>-----ykepfgvkldfetgii ENAKKSVRRLSMKYFIDEAWKMKVVEGDPVVEVYVIEQEEKEGDLNFATTVLYPGKVINfFmTKGFHAKKIDRAEYFAFKKGGMLQTPGEARFIEMEPGTIVVPPYWARTRINTGDKPFIFLALypadaghdtygiaekgfskivveengkvvkdnpk-----<br/>kleqvlvclngscrviiddgniqeitledspavglyvgpavwhemhdssfscvmmvlasdydetdyirqydnfkkyiakindle</p> <p><b>Proposed:</b> aliSize=113 (resi) RMSD=2.37 (Å)<br/>e-----NKV-----INFKIID-----SRGSLVAIEN--knipfSIKRVYIYFDTKGE-----EPRGFHAKK--LEOLVCLNNGSCRVIIDGNIIOEITLDSpaVGLYVGFVAVWEMHDFS-SDCVMMVLSADY-yDetDYIROY--D-----<br/>-----ykepfgvkldfetgii ENAKKSVRRLSdmkgyfideeawkkmveegdpvvyEVYVIEQEEke-----GDLNFATTVLYPKvgnefFMTKGFHAKKIDRAEYFAFKKGGMLQTPGEARFIEMEPG-TIVVPPYWARTRINTGDKPFIFLAIPADAG--G--HDYGTIaeKgfskivveengkvv<br/>-----nfkkyiakindle<br/>kdnpk</p> |
| 619 | 2pa7A (135)<br>1qxrA (187) | N | 14.07 | <p><b>TM-align:</b> aliSize=95 (resi) RMSD=3.01 (Å)<br/>enkvnfkkidsrgslvaieenknip-----FSIKRVYIYFDTKGE-----EPRGFHAKK--LEOLVCLNNGSCRVIIDGNIIOEITLDSpaVGLYVGFVAVWEMHDFS-SDCVMMVLSADYYDeTDYIR<br/>-----mykepfgvkldfetgii egakksvrrlsdmegyfvderawkelvekedpvvyevyaveeekEGDLNFATTVLYPKvgkefFMTKGFHAKKIDRAEYFAFKKGGMLQTPEGDAKWISMEPG-TVVVPPYWARTRVNIgDgEPFIFLAIPADAG--HDY</p> <p>ROY-DNFkkyiakindle-----<br/>GTlaEKG-----fskivieengekvvdnprw</p> <p><b>SARST:</b> aliSize=102 (resi) RMSD=8.78 (Å)<br/>enkvnfkkids-----RGSLSVAIENKNIPESIKRVYIYFDTKGeEPRGFHAKK--KLEOLVCLNNGSCRVIID--DGNIOEITLdsAVGLYVGFVAVWEMHDFS-SDCVMMVLSADYYDeTDYIR-----<br/>-----mykepfgvkldfetgii egakksvrrlsdmegyfvderawkelvekedpvvyEVYVIEQEEKEGDLNFATTVLYPGKVGKEF--FMTKGFHAKKIDRAEYFAFKKGGMLQTPEGDAKWISMEPG-TVVVPPYWARTRVNIgDgEPFIFLAIPADAGHDYgtiaekgfskiv<br/>-----qydnfkkyiakindle<br/>ieengekvvdnprw</p> <p><b>BLAST:</b> aliSize=29 (resi) iden=14.07% (19/135) simi=21.48% (29/135)<br/>enkvnfkkidsrgslvaieenknipfsikrvyvi-----DfKGEeprgFAHKKLEOLVCLNNGSCRVIID--DGNIOEITLdsAVGLYVGFVAVW-----<br/>-----mykepfgvkldfetgii egakksvrrlsdmegyfvderawkelvekedpvvyevyaveeekEGDLNFATTVLYPGKVGKEF--FMTKGFHAKKIDRAEYFAFKKGGMLQTPEGDAKWISMEPG-TVVVPPYWARTRVNIgDgEPFIFLAIPADAGHDYgtiaekgfskiv<br/>-----hemhdssfscvmmvlasdydetdyirqydnfkkyiakindle<br/>flaiypadaghdtygiaekgfskivieengekvvdnprw</p> <p><b>Proposed:</b> aliSize=113 (resi) RMSD=2.43 (Å)<br/>e-----NKV-----INFKIID-----SRGSLVAIEN--knipfSIKRVYIYFDTKGE-----EPRGFHAKK--LEOLVCLNNGSCRVIIDGNIIOEITLDSpaVGLYVGFVAVWEMHDFS-SDCVMMVLSADY-yDetDYIROY--D-----<br/>-----mykepfgvkldfetgii EGAKKSVRRLSdmegyfvderawkelvekedpvvyEVYVIEQEEke-----GDLNFATTVLYPKvgkefFMTKGFHAKKIDRAEYFAFKKGGMLQTPEGDAKWISMEPG-TVVVPPYWARTRVNIgDgEPFIFLAIPADAG--G--HDYGTIaeKgfskivieengekv<br/>-----nfkkyiakindle<br/>vvdnprw</p>                                 |
| 620 | 2pa7A (135)<br>1zvfA (176) | C | 10.37 | <p><b>TM-align:</b> aliSize=89 (resi) RMSD=2.84 (Å)<br/>enkvnfkkidsrgslvaieenknipfs-----IKRYYIFdTKGeEPRGFHAKKLEOLVCLNNGSCRVIIDGNI-----IOEITLDSpaVGLYVGFVAVWEMHDfSSDCVMMVLSADYYDe--TDYIROY-----D--NFkkyiakindle-----<br/>-----amfnttpinidkwkenegllkppvnnyclhkgGFTMIVG-GPN--RTDY--INP--TPEWfYQKKGSMllkVVDETdaepKFIDIINEG-DSYLLPGNPPSPV-RFADTGIIVE-QDRP-ggENDKIRWycshcrqvvhes-----elqmdl</p> <p>gtqvkaieldfendvekrctfhcktlnyarpq</p> <p><b>SARST:</b> aliSize=88 (resi) RMSD=5.71 (Å)<br/>enkvnfkkidsrgslvaieenkn-----IPFSIKRVYIYFDTKGEEPFGFAHKKLEOLVCLNNGSCRVIIDGNI---IOEITLDSpaVGLYVGFVAVWEMHDfssdcvmmvlasdydetdy-----<br/>-----amfnttpinidkwkenegllkppvnnyclhkgGFTVMIV--GPN--RTDYHINPTPEWfYQKKGSMllkVVDETdaepKFIDIINEGDSYLLPGNPPSPV---ADTVGIIVEQDRPggEndkiRWycshcrqvvheselqmdlgtqvkaieldfendve<br/>-----irqydnfkkyiakindle<br/>krctfhcktlnyarpq</p> <p><b>BLAST:</b> aliSize=9 (resi) iden=4.44% (6/135) simi=6.67% (9/135)<br/>enkvnfkkidsrgslvaieenknipfsikrvyifdtkgeepfgfahkkleovlclngscrviiddg-----NIIOEITLDSpaVGLYVGFVAVWEMHDfSSDCVMMVLSADYYDe--etDYIRD-----YDNEKK<br/>-----amfnttpinidkwkenegllkppvnnyclhkggFTMIVG-GP--NEntDYHIN--PTPEWfYQKKGSMllkVVDETdaepKFIDIINEG-DSYLLPGNPPSPV-RFADTGIIVE-QDRP-ggEndkiRWycshcrqvvheselqmdlGTQVVE<br/>-----ILDDGNIIOEITLDSpaVGLYVGFVAVWEMHDfSSDCVMMVLSADYYDe--etDYIRD-----YDNEKK<br/>RWycshcrqvvheselqMDLGTQVKAIIdfendvekrctfhcktlnyarpq</p> <p><b>Proposed:</b> aliSize=95 (resi) RMSD=1.88 (Å)<br/>enkvnfkkidsrgslvaieenknipfsi-----KRYYIFdTKGeEPF-GF-AHKKLEOLVCLNNGSCRVIIDG--NIIOEITLDSpaVGLYVGFVAVWEMHDfSSDCVMMVLSADYYDe--etDYIRD-----YDNEKK<br/>-----amfnttpinidkwkenegllkppvnnyclhkggFTMIVG-GP--NEntDYHIN--PTPEWfYQKKGSMllkVVDETdaepKFIDIINEG-DSYLLPGNPPSPV-RFADTGIIVE-QDRP-ggEndkiRWycshcrqvvheselqmdlGTQVVE<br/>YAKINLE-----<br/>ALDFENDvekrctfhcktlnyarpq</p>                                        |

|     |             |   |       |                                                                                                                                                                                                                                                                                                                                                                                                                                                                                                                                                                                                                                                                                                                                                                                                                                                                                                                                                                                                                                                                                                                                                                                                                                             |
|-----|-------------|---|-------|---------------------------------------------------------------------------------------------------------------------------------------------------------------------------------------------------------------------------------------------------------------------------------------------------------------------------------------------------------------------------------------------------------------------------------------------------------------------------------------------------------------------------------------------------------------------------------------------------------------------------------------------------------------------------------------------------------------------------------------------------------------------------------------------------------------------------------------------------------------------------------------------------------------------------------------------------------------------------------------------------------------------------------------------------------------------------------------------------------------------------------------------------------------------------------------------------------------------------------------------|
| 621 | 2pa7A (135) | N | 13.33 | <p><b>TM-align:</b> aliSize=108 (resi) RMSD=3.26 (Å)<br/>enkvinf--K...idsrgSLV--A--LE--E-----N-KNIPf-----S--IKRVYYIFdTKGEEPRGFAA...KLEOVVC...N...SCRVI...DDGN-----IIOEITLDSPaVGLYVGPA-VWEMHDFS--SDCVMMV...ASDYYEtDYIROY---DNFkky</p> <p><b>SARST:</b> aliSize=95 (resi) RMSD=13.94 (Å)<br/>enkvinfk...idsrgslva...ieenknipfsik...rvyyifdtkgeepRGFhah...KLEOVVC...N...SCRVI...DDGN...IOEITLDSPaVGLYVGPAVWEMHDFS...SDCVMMV...LAS-----</p> <p><b>BLAST:</b> aliSize=22 (resi) iden=9.63% (13/135) simi=16.30% (22/135)<br/>enkvinfk...idsrgslva...ieenknipfsik...rvyyifdtkgeepRGFhah...KLEOVVC...N...SCRVI...DDGN...IOEITLDSPaVGLYVGPAVWEMHDFS...SDCVMMV...LAS-----</p> <p><b>Proposed:</b> aliSize=116 (resi) RMSD=2.52 (Å)<br/>ellkprtladlirilhelhfagdevnveevqavleayesnpaewalyAKF...QRYRYRN...LVDQ...GNgkFNLMILC-WGEGHGSSIDTDSHCFLK...L...OGNLKETF...FWPDKKSNEI-KKSERT...RENQCA...INDS...IGL...RVENV...shTEPA...SLH...Y...PPFF...T--CHAFDQrtGHk...vmt</p>                                                                                                                                                                                                                                                                                    |
| 622 | 2pa7A (135) | N | 13.33 | <p><b>TM-align:</b> aliSize=95 (resi) RMSD=3.06 (Å)<br/>enkvinfk...idsrgslva...ieenknip-----E...S...IKRVYYIFDTK...E-----EPRGFA...K...-LEO...L...C...N...SCRVI...DDGN-I...O...E...ITLDS...PaVGLYVGPAVWEMHDFS-SDCVMMV...LASDYYDeDY</p> <p><b>SARST:</b> aliSize=98 (resi) RMSD=8.54 (Å)<br/>enkvinfk...ids...mmypef...gskivieengekvvdnprw</p> <p><b>BLAST:</b> aliSize=29 (resi) iden=14.07% (19/135) simi=21.48% (29/135)<br/>enkvinfk...idsrgslva...ieenknipfsik...rvyyifdtkgeepRGFhah...KLEOVVC...N...SCRVI...DDGN...IOEITLDS...PaVGLYVGPAVWEMHDFS...SDCVMMV...LASDYYDeDY</p> <p><b>Proposed:</b> aliSize=113 (resi) RMSD=2.49 (Å)<br/>e...NKVI...ID...SRGSLVA...IEEN-knipfS--IKRVYYIFDTK...E-----EPRGFA...K...-LEO...L...C...N...SCRVI...DDGN-I...O...E...ITLDS...PaVGLYVGPAVWEMHDFS-SDCVMMV...LASDYYDeDY</p>                                                                                                                                                                                                                                                                                                                                                                                                                             |
| 623 | 2pc1A (173) | C | 15.86 | <p><b>TM-align:</b> aliSize=133 (resi) RMSD=2.67 (Å)<br/>nlyfqG...RLAFPNEIDOI-L...IEEARaeiaktgsdqWQkedGY-PNRNDI...DDTLN--GYAWVGI...E...L...ATYA...V...IDG...EEvYdaIyegkW...H...N...HRYLTFHR...IAISNO...FRGLAOTFLOGLIEGHK---GPDFRC...THEKNVT...OHILNK...GYOYCGK...P...LDGvrlay...k...ikek---</p> <p><b>SARST:</b> aliSize=129 (resi) RMSD=6.86 (Å)<br/>nlyfqgq...RLAFPNEIDOI...L...IEEARaeiaktgsdqWQkedGY-PNRNDI...DDTLN--GYAWVGI...E...L...ATYA...V...IDG...EEvYdaIyegkW...H...N...HRYLTFHR...IAISNO...FRGLAOTFLOGLIEGHK---GPDFRC...THEKNVT...OHILNK...GYOYCGK...P...LDGvrlay...k...ikek---</p> <p><b>BLAST:</b> aliSize=66 (resi) iden=23.45% (34/145) simi=45.52% (66/145)<br/>nlyfqgq...irlafpneidqillieeara...E...AK...GSD...NO...E...D...Y...PNRNDI...DDTLN--GYAWVGI...E...L...ATYA...V...IDG...EEvYdaIyegkW...H...N...HRYLTFHR...IAISNO...FRGLAOTFLOGLIEGHK---GPDFRC...THEKNVT...OHILNK...GYOYCGK...P...LDGvrlay...k...ikek---</p> <p><b>Proposed:</b> aliSize=137 (resi) RMSD=2.23 (Å)<br/>nlyfqg...RLAFPNEIDOI...L...IEEARaeiaktgsdqWQkedG--yPNRNDI...DDTLN--GYAWVGI...E...L...ATYA...V...IDG...EEvYdaIyegkW...H...N...HRYLTFHR...IAISNO...FRGLAOTFLOGLIEGHK---GPDFRC...THEKNVT...OHILNK...GYOYCGK...P...LDGvrlay...k...ikek---</p> |



|     |                                                     |   |       |                                                                                                                                                                                                                                                                                                                                                                                                                                                                                                                                                                                                                                                                                                                                                                                                                                                                                                                                                                                                                                                                                                                                                                                                                                                                                                                                                                                                                                                                                                                                                                                                                                                                                                                                                                                                   |
|-----|-----------------------------------------------------|---|-------|---------------------------------------------------------------------------------------------------------------------------------------------------------------------------------------------------------------------------------------------------------------------------------------------------------------------------------------------------------------------------------------------------------------------------------------------------------------------------------------------------------------------------------------------------------------------------------------------------------------------------------------------------------------------------------------------------------------------------------------------------------------------------------------------------------------------------------------------------------------------------------------------------------------------------------------------------------------------------------------------------------------------------------------------------------------------------------------------------------------------------------------------------------------------------------------------------------------------------------------------------------------------------------------------------------------------------------------------------------------------------------------------------------------------------------------------------------------------------------------------------------------------------------------------------------------------------------------------------------------------------------------------------------------------------------------------------------------------------------------------------------------------------------------------------|
| 624 | <p>2pc1A<br/>(173)</p> <hr/> <p>2d4pA<br/>(130)</p> | C | 8.46  | <p><b>TM-align:</b> aliSize=115 (resi) RMSD=2.66 (Å)<br/> nlyfqGOTRLAFPNEIDQILLIEEArAeiaktgsdqwkedgyPNRNdiDDTLN--GY--AWVGIIDG-LATYAAVIDGHEEvydaiyegkwlhdNHRYLTFHRIAISnqfRgRGLAOTFLOGLIEGHK---GPDFRCDTHEKNVT-OHINKLYOY--CGKVPDgvrLAYqkikek---<br/> -----MRFRPFTEEDLRLNRAG--K-----RPVS--LGALRFFaRTghSFLAEIGEPMGFALAQAQVWQ-----GEATTVLVTRIEGR--S-VEALRGLRAVVKSAYdagVYEVALHLDPERKEIEEALKAEGFALgpLVLAIVRL-----gsr</p> <p><b>SARST:</b> aliSize=113 (resi) RMSD=6.00 (Å)<br/> nlyfqgq---IRLAFPNEIDQILLIEEArAeiaktgsdqwkedgyPNRNdiDDTLN--GY--AWVGIIDG-LATYAAVIDGHEEvydaiyEGKwLhdnhryLTFHRIAISNOFRgrGLAOTFLOGLIEGHK---GPDFRCDTHEKNVTOHILNLGYOYCG-----kvpldgvrLAYqkikek<br/> -----mrFRPFTEEDLRLNRAG--K-----PVSLGALRFFARTghSFLAEIGEPMGFALAQAQVWQ-----GEA-----TIVLVTRIEGRSV--EALRGLRAVVKSAYdagVYEVALHLDPERKEIEEALKAEGFALgpLVLAIVRLgsr-----</p> <p><b>BLAST:</b> aliSize=6 (resi) iden=4.62% (6/130) simi=4.62% (6/130)<br/> nlyfqgqirlafpneidqillieeArAeiaktgsdqwkedgyPNRNdiDDTLN--GY--AWVGIIDG-LATYAAVIDGHEEvydaiyegkwlhdnhryLTFHRIAISnqfRgRGLAOTFLOGLIEGHK---GPDFRCDTHEKNVT-OHINKLYOY--CGKVPDgvrLAYqkikek<br/> -----MRFRPFTEEDLRLNRAG--K-----RPVS--LGALRFFaRTghSFLAEIGEPMGFALAQAQVWQ-----GEA-----TIVLVTRIEGRSV--EALRGLRAVVKSAYdagVYEVALHLDPERKEIEEALKAEGFALgpLVLAIVRLgsr-----</p> <p><b>Proposed:</b> aliSize=119 (resi) RMSD=2.11 (Å)<br/> nlyfqGOTRLAFPNEIDQILLIEEArAeiaktgsdqwkedgyPNRNdiDDTLN--GY--AWVGIIDG-LATYAAVIDGHEEvydaiyegkwlhdNH--RYLTFHRIAISnqfRgRGLAOTFLOGLIEGHK---GPDFRCDTHEKNVTMOHINKLYOY--CGKVPDgvrLAYqkikek<br/> -----MRFRPFTEEDLRLNRAG--K-----RPVS--LGALRFFaRTghSFLAEIGEPMGFALAQAQVWQ-----GGeATTVLVTRIEGR--S-VEALRGLRAVVKSAYdagVYEVALHLDPERKEIEEALKAEGFALgpLVLAIVRLGSR-----</p>                                                                                                         |
| 625 | <p>2pc1A<br/>(173)</p> <hr/> <p>2vbqA<br/>(147)</p> | C | 14.97 | <p><b>TM-align:</b> aliSize=134 (resi) RMSD=2.89 (Å)<br/> nlyf-OGOTRLAFPNEIDQILLIEEArAeiaktgsdqwkedgyPNRNdiDDTLN--GY--AWVGIIDG-LATYAAVIDGHEEvydaiyegkwlhdNHRYLTFHRIAISNOFRgrGLAOTFLOGLIEGHK---GPDFRCDTHEKNVT-OHINKLYOYCGVPLDgvrLAYqkikek---<br/> -----sHMDTRQMNKTHLEHWrgLRKQLWP-----G--HPDdAHLAGEEILQAdhLASFIAMADGVAIGFADASIRHDY-V--N---G-CSSPVPVFLGIFVLPSPFRQGVAKQLIAAVQRWgTnkgCREMASDTSPEntISQKVHQAALCFEETERVITfYR-----krc</p> <p><b>SARST:</b> aliSize=129 (resi) RMSD=7.07 (Å)<br/> nlyfqgq---IRLAFPNEIDQILLIEEArAeiaktgsDOWOKEGypnRNDIIDDTLN--GY--AWVGIIDG-LATYAAVIDGHEEvydAI-----EGKwLhdnhryLTFHRIAISNOFRgrGLAOTFLOGLIEGHKGP---DFRCDTHEKNVT-OHINKLYOYCGVPLDgvrLAYqkikek<br/> -----shmdTRQMNKTHLEHWrgLRKQLWP-----WPGHPDdAHLAGEEILQAdhLASFIAMADGVAIGFADASIRHDY-V--N---HDVngcDSSP-----VVFLEGIIFVLPSPFRQGVAKQLIAAVQRWgTnkgCREMASDTSPEntISQKVHQAALCFEETERVITfYR-----RVIYR-----</p> <p><b>BLAST:</b> aliSize=66 (resi) iden=23.13% (34/147) simi=44.90% (66/147)<br/> nlyfqgqirlafpneidqillieeArAeiaktgsDOWOKEGypnRNDIIDDTLN--GY--AWVGIIDG-LATYAAVIDGHEEvydAI-----EGKwLhdnhryLTFHRIAISNOFRgrGLAOTFLOGLIEGHKGP---DFRCDTHEKNVT-OHINKLYOYCGVPLDgvrLAYqkikek<br/> -----shmdTRQMNKTHLEHWrgLRKQLWP-----WPGHPDdAHLAGEEILQAdhLASFIAMADGVAIGFADASIRHDY-V--N---HDVngcDSSP-----VVFLEGIIFVLPSPFRQGVAKQLIAAVQRWgTnkgCREMASDTSPEntISQKVHQAALCFEETERVITfYR-----RVIYR-----</p> <p><b>Proposed:</b> aliSize=137 (resi) RMSD=2.39 (Å)<br/> nlyfqGOTRLAFPNEIDQILLIEEArAeiaktgsdqwkedgyPNRNdiDDTLN--GY--AWVGIIDG-LATYAAVIDGHEEvydaiyegkwlhdNHRYLTFHRIAISNOFRgrGLAOTFLOGLIEGHK---GPDFRCDTHEKNVTMOHINKLYOYCGVPLDgvrLAYqkikek<br/> -----sHMDTRQMNKTHLEHWrgLRKQLWP-----G--HPDdAHLAGEEILQAdhLASFIAMADGVAIGFADASIRHDY-V--N---G-CSSPVPVFLGIFVLPSPFRQGVAKQLIAAVQRWgTnkgCREMASDTSPEntISQKVHQAALCFEETERVITfYR-----YRRC-----</p> |
| 626 | <p>2pd7A<br/>(149)</p> <hr/> <p>2gj3B<br/>(119)</p> | N | 23.53 | <p><b>TM-align:</b> aliSize=105 (resi) RMSD=2.02 (Å)<br/> mhtlyapgy---DIMGyliqimnrPnpqvelgvp-DT--S-CALILCDLkqkDTPVYASEAFLYMTGYSNAEVLGRNCRFLQSPDgmvkpksTRKYVDSNTINTMRKAIIDRNAEVOVEVNFKKNQORFVNFITMIPVRDeTG--YRYSMGFQCE----<br/> -----ellpeIFRQTVehAP-----qTvehApIASITDL---KANILYANRAFRRTITGYGSEVVLGKNEISLNSN-----G-TTPRLVYQALWGRLAQKPPWSGVLNRRKDKTLYLAELTVAPVNLN--EagTIYYLGMHRDtsel</p> <p><b>SARST:</b> aliSize=109 (resi) RMSD=4.90 (Å)<br/> mhtlyapgydim---GYLIQIMNRPnpqvelgvpdtscALILCDLkqkDTPVYASEAFLYMTGYSNAEVLGRNCRFLQSPDgmvkpksTRKYVDSNTINTMRKAIIDRNAEVOVEVNFKKNQORFVNFITMIPVRDeTG--YRYSMGFQCE----e<br/> -----ellpeIFRQTVehAP-----IASITDL---KANILYANRAFRRTITGYGSEVVLGKNEISLNSN-----SNGTTPRLVYQALWGRLAQKPPWSGVLNRRKDKTLYLAELTVAPVNLN--EagTIYYLGMHRDtsel</p> <p><b>BLAST:</b> aliSize=58 (resi) iden=30.25% (36/119) simi=48.74% (58/119)<br/> mhtlyapgydimgyliqimnrPnpqvelgvpdtscALILCDLkqkDTPVYASEAFLYMTGYSNAEVLGRNCRFLQSPDgmvkpksTRKYVDSNTINTMRKAIIDRNAEVOVEVNFKKNQORFVNFITMIPVRDeTG--YRYSMGFQCE----fqce<br/> -----ellpeifrgtVEHAP-----IASITDL---KANILYANRAFRRTITGYGSEVVLGKNEISLNSN-----G-TTPRLVYQALWGRLAQKPPWSGVLNRRKDKTLYLAELTVAPVNLN--EagTIYYLGMHRDtsel</p> <p><b>Proposed:</b> aliSize=114 (resi) RMSD=1.52 (Å)<br/> mhtlyapgyDIMGYLIQIMNRPnpqvelgvpdtscALILCDLkqkDTPVYASEAFLYMTGYSNAEVLGRNCRFLQSPDgmvkpksTRKYVDSNTINTMRKAIIDRNAEVOVEVNFKKNQORFVNFITMIPVRDeTG--YRYSMGFQCE----<br/> -----ELLPEIFRQTVehAP-----IASITDL---KANILYANRAFRRTITGYGSEVVLGKNEISLNSN-----G-TTPRLVYQALWGRLAQKPPWSGVLNRRKDKTLYLAELTVAPVNLN--EagTIYYLGMHRDtsel</p>                                                                                                                                                                                                                                                   |

|     |                                               |   |       |                                                                                                                                                                                                                                                                                                                                                                                                                                                                                                                                                                                                                                                                                                                                                                                                                                                                                                                                                                                                                                                                                                                                                                                                                                                                                                                                                                                                                                                                                                                                                                                                                                                                                                                                                                                       |
|-----|-----------------------------------------------|---|-------|---------------------------------------------------------------------------------------------------------------------------------------------------------------------------------------------------------------------------------------------------------------------------------------------------------------------------------------------------------------------------------------------------------------------------------------------------------------------------------------------------------------------------------------------------------------------------------------------------------------------------------------------------------------------------------------------------------------------------------------------------------------------------------------------------------------------------------------------------------------------------------------------------------------------------------------------------------------------------------------------------------------------------------------------------------------------------------------------------------------------------------------------------------------------------------------------------------------------------------------------------------------------------------------------------------------------------------------------------------------------------------------------------------------------------------------------------------------------------------------------------------------------------------------------------------------------------------------------------------------------------------------------------------------------------------------------------------------------------------------------------------------------------------------|
| 627 | <p>2pd7A<br/>(149)</p> <p>2z6cA<br/>(121)</p> | N | 30.58 | <p><b>TM-align:</b> aliSize=104 (resi) RMSD=1.77 (Å)<br/> mhtlyapggymingyliqimnrpnqpvelgpvdt-----SCALILCLKQKTPITVYASEAFlyMTGYSNAEVLGRNCRFLQSPdgmvkpkstrKYVDSNTINTMRKAI DRNAEVQVEVVNFKNQQRVNFLLMI PVRDET EYRYSMCFQC-----<br/> -----vsedlkda lsfqqt fVVSATKPYPI MYASAGFNMTGYTSKEVVGRCRFLQ-----SGTDAELAKI RETLAAGNNYCGRILNYKDKTSEWNLTIAP IKDESKVLKFIGMVevskht</p> <p><b>SARST:</b> aliSize=113 (resi) RMSD=9.23 (Å)<br/> mhtlyapggyming--YLQIMNRpnqpVELGPVdtscAl ILCLKQKTPITVYASEAFlyMTGYSNAEVLGRNCRFLQSPDgmvkpkstrkyVDSNTINTMRKAI DRNAEVQVEVVNFKNQQRVNFLLMI PVRDET EYRYSMCFQC-----e<br/> -----vsEDLKDAL S-----TFQQT F-----VVSATKPYPI MYASAGFNMTGYTSKEVVGRCRFLQSGS-----TDAELAKI RETLAAGNNYCGRILNYKDKTSEWNLTIAP IKDESKVLKFIGMVevskht-</p> <p><b>BLAST:</b> aliSize=63 (resi) iden=33.06% (40/121) simi=52.07% (63/121)<br/> mhtlyapggymingyliqimnrpnqpvelgpvdtscAl-----ILCLKQKTPITVYASEAFlyMTGYSNAEVLGRNCRFLQSPdgmvkpkstrkyVDSNTINTMRKAI DRNAEVQVEVVNFKNQQRVNFLLMI PVRDET EYRYSMCFQC-----<br/> -----vsedlkda lsfqqt fVVSATKPYPI MYASAGFNMTGYTSKEVVGRCRFLQSGS-----TDAELAKI RETLAAGNNYCGRILNYKDKTSEWNLTIAP IKDESKVLKFIGMVevskht</p> <p><b>Proposed:</b> aliSize=115 (resi) RMSD=1.57 (Å)<br/> mhtlyapggYdIMGYLQIMnRpnPqVELgpvdtscALILCLKQKTPITVYASEAFlyMTGYSNAEVLGRNCRFLQSPdgmvkpkstrKYVDSNTINTMRKAI DRNAEVQVEVVNFKNQQRVNFLLMI PVRDET EYRYSMCFQC-----<br/> -----V-SEDLKDALS-T--F-QQ-----TFVVSATKPYPI MYASAGFNMTGYTSKEVVGRCRFLQSGS-----SGTDAELAKI RETLAAGNNYCGRILNYKDKTSEWNLTIAP IKDESKVLKFIGMVevskht</p>                                                                                                                                                                                                                                                                                    |
| 628 | <p>2pieA<br/>(132)</p> <p>lj4kA<br/>(158)</p> | C | 15.15 | <p><b>TM-align:</b> aliSize=109 (resi) RMSD=2.71 (Å)<br/> gahMagrSWCRRVGM--SAGW LLEDG-C-EVTVGRGFGVTYOLVSKicplMI SRNHCVLKNPE-----GOWTMDNkSLGVLNRARLEPLRVYSIHOGDYIQLGVPLENKENAEYEYEVT EEDwetivpcls pkn-----<br/> --GN--GRFLT KPLPDSiIQESIEIQQVnPPFiGRSEDCNCKIEDNRLSRVHCFIFKKRHavgksmyespaqgDDI WYCHTGT VSYLNNRMIQGTKFLLQDGEIKI IWDKNNK-FV-IGFKVEIND-----t g l f n e g l g m l q e q r v l k q t a e k d l v k k l</p> <p><b>SARST:</b> aliSize=108 (resi) RMSD=13.81 (Å)<br/> gahmaggr-----SWCRRVGM SAGW LLEDG--CEVTVGRGFGVTYOLVSKicplMI SRNHCVLKNPEGOWTI DNKSLN VVWLNRRARLEP--LRVYSIHOGDYIQLGVPLENKENAEYEY-----EVT EEDwetivpcls pkn-----<br/> -----gngrfLTLKPLPDSiIQESIEIQQgVnPPFiGRSEDCNCKIEDNRLSRVHCFIFKKRHAVGKSYESPAGLDDI WYCHTgtN VSYLNNRMIQGTKFLLQDGEIKI IWDknnkfVIGFKVEINDt g l f n e g l g m l q e q r v l k q t a e k d l v k k l-----</p> <p><b>BLAST:</b> aliSize=50 (resi) iden=17.42% (23/132) simi=37.88% (50/132)<br/> gahmaggrswclrrvgsagwl-----LLEDGCYIVT--RG--EVTYOLVSKICPLMISRNVHCVL--KNPEGOWTMDN--KSLNGV-----LNRRARLEPLRVYSIHOGDYIQLGVPLENKENAEYEYVTE-----edwetivpcls pkn<br/> -----gngrfLTLKPLPDSiIQESIEIQQVnPPFiGRSEDCNCKIEDNRLSRVHCFIFKHAVGK-SMYESpaqGLDDI WychtgtNvsyLNNRMIQGTKFLLQDGEIKI IWDKNNK-FVIGFKVEINDt g l f n e g l g m l q e q r v l k q t a e k d l v k k l-----</p> <p>lspkn<br/> -----</p> <p><b>Proposed:</b> aliSize=112 (resi) RMSD=2.01 (Å)<br/> gahMagr--rSWCRRVGM--msAGW LLEDG-C-EVTVGRGFGVTYOLVSKicPIMI SRNHCVLKNPE-----GOWTMDNkSLGVLNRARLEPLRVYSIHOGDYIQLGVPLENKENAEYEYVTE-----edWETIYPCls pkn<br/> ---G--nGr-FLT KPLPDSiIQESIEIQQVnPPFiGRSEDCNCKIEDNRLSRVHCFIFKKRHavgksmyespaqgDDI WYCHTGT VSYLNNRMIQGTKFLLQDGEIKI IWDKNNK--FVIGFKVEINDt g l f n e g l g m l q e q r v l k q t a e EEDL VKK-----</p>                                      |
| 629 | <p>2pr1A<br/>(152)</p> <p>lqsmA<br/>(150)</p> | C | 9.33  | <p><b>TM-align:</b> aliSize=123 (resi) RMSD=2.90 (Å)<br/> M-TKVERLLI--YKTLLEEFKFKFY-----GIQELSMLEELQDNIiENDSTSpfyGIYFG--DKLVARMSLYOVNGKSNpyfdnRODYLELWKLELPGYONRYGRALVEFAKS-FK---MPTRTNPR-MK--SAEFWNMNFKTVEYdmarDKGedplIwhpdmr----<br/> DnITRFVTENdkEGWQRLWkSYQdfyevSFPDDLDDFN-----G--rFLdpnikMWA AVAVESSSEK IIGMINFFNHMTT-----WDFKIKIYINDIY DENSRVKGAGKLIQFVYDeADKlgTPSVYWCTDeSNHRAQLLYVVGKAPK I-----LYK-----rkgy</p> <p><b>SARST:</b> aliSize=122 (resi) RMSD=8.84 (Å)<br/> mtkverllin-----YKTLLEEFKFKFYGIQELSMLEELQDNIiENDSTSpfyGIYFG--DKLVARMSLYOVNGKSNpyfdnRODYLELWKLELPGYONRYGRALVEFAKSPFKM-PTRTNPRMKS AEFWNMNFKTVEYdmarDKgeDPLIWHPD--mr<br/> -----dnitrvftendkegwqrlwSYQDFYEV-SFPDDLDDFNFRFLDP-NIKMWA--AVAVESSSEK IIGMINFFNHMTT-----FKDKIYINDIY DENSRVKGAGKLIQFVYDEADKLGTPSVYWCTDESNHRAQLLYVVGKAPK I-----KLYKRKGY---</p> <p><b>BLAST:</b> aliSize=9 (resi) iden=4.00% (6/150) simi=6.00% (9/150)<br/> mtkverllinyktleefkfkfygiqelsmleelqdni iendstspfygiyfgdklvarmslyqvnngksnpyfdnrqdyelwklevlpgyqnrgralvefaksfkmpirtnprmkSAEFwnkmnfk-----YKDMARDKGEDPLIWHPDM-----<br/> -----dnitrvftendkegwqrlwSYQDFYEV-SFPDDLDDFNFRFLDP-NIKMWA--AVAVESSSEK IIGMINFFNHMTT-----WDFKIKIYINDIY DENSRVKGAGKLIQFVYDeADKlgTPSVYWCTDeSNHRAQLLYVVGKAPK I-----LYKRKGY-----</p> <p>kiigminffnhmttwdfkdkiyindlydensrvkgagkLIQFVYdeADKlgTPSVYWCTdeSNHRAQLLYVVGKAPK Ilykrkgy-</p> <p><b>Proposed:</b> aliSize=119 (resi) RMSD=2.24 (Å)<br/> M-TKVERLLIYKTLLEEFKFKFY-----GIQELSMLEELQDNIiENDSTSpfyGIYFG--DKLVARMSLYOVNGKSNpyfdnRODYLELWKLELPGYONRYGRALVEFAKS-FK---MPTRTNPR-MK--SAEFWNMNFKTVEYdmarDKgedplIWHPDM--drc<br/> DnITRFVTEN--DKEGWQRLWkSYQdfyevsFP--DDLDD-Fnfr-----FLdpnikMWA AVAVESSSEK IIGMINFFNHMTT-----WDFKIKIYINDIY DENSRVKGAGKLIQFVYDeADKlgTPSVYWCTDeSNHRAQLLYVVGKAPK I-----LYKRKGYa-----</p> |

|     |                                                     |   |       |                                                                                                                                                                                                                                                                                                                                                                                                                                                                                                                                                                                                                                                                                                                                                                                                                                                                                                                                                                                                                                                                                                                                                                                                                                                                                                                                                                                                                                                                                                                                                                                                                                                                                                                                                                                                                      |
|-----|-----------------------------------------------------|---|-------|----------------------------------------------------------------------------------------------------------------------------------------------------------------------------------------------------------------------------------------------------------------------------------------------------------------------------------------------------------------------------------------------------------------------------------------------------------------------------------------------------------------------------------------------------------------------------------------------------------------------------------------------------------------------------------------------------------------------------------------------------------------------------------------------------------------------------------------------------------------------------------------------------------------------------------------------------------------------------------------------------------------------------------------------------------------------------------------------------------------------------------------------------------------------------------------------------------------------------------------------------------------------------------------------------------------------------------------------------------------------------------------------------------------------------------------------------------------------------------------------------------------------------------------------------------------------------------------------------------------------------------------------------------------------------------------------------------------------------------------------------------------------------------------------------------------------|
| 630 | <p>2pr1A<br/>(152)</p> <hr/> <p>1qsmB<br/>(149)</p> | C | 10.07 | <p><b>TM-align:</b> aliSize=123 (resi) RMSD=2.91 (Å)<br/> MTKVERLLIN-YKTLLEEFKFKKEY-GIQELSMLEELQDNIEND-STSPFYGIYFGDKLVARMSLYOVNGKSNPYFDNR-ODYLELWKEVLPGYONRCYGRAVEFAKS-FK---MPTRTNPR-MK-SAEFWNMNFKTVKYdmarDKGedpliwhpmdr----<br/> NITVRFVTENDKEGWORLWQSYQDFYEVSPDDLDLDFNF-----G--rFLDpnikMWAAVAVESSSEKILGMINFFNHMTT-----WDFKIKIYINDIYDENSRVKAGGKLIQFVYDEADKlgtPSVYWCTDeSNhrAQLLYVVGYPKAPKII-----LYK-----rkg</p> <p><b>SARST:</b> aliSize=103 (resi) RMSD=6.44 (Å)<br/> mtkverllin-----YKTLLEEFKFKKEYGQELSMLEELQDNIENDSTSPFYGIYFGDKLVARMSLYOVNGKSNPYFDNR-ODYLELWKEVLPGYONRCYGRAVEFAKS-FK---MPTRTNPRMKSaeFWNM-----nfktvkydmarkgedpl<br/> -----nitvrfvtendkegwqrLWKSQDFYEVSPDDLDLDFNFGRFLDPN-----IKMWAAVAVESSSEKILGMINFFNHMTT-----FKIKIYINDIYDENSRVKAGGKLIQFVYDEADKlgtPSVYWCTDeSN---HRAQLlyvkvgypkiiylkrkgy-----</p> <p>iwhpmdr<br/> -----</p> <p><b>BLAST:</b> aliSize=9 (resi) iden=4.03% (6/149) simi=6.04% (9/149)<br/> mtkverllinyktleefkfkkeygiqelsmleelqdniendstspfygiyfgdklvarmslyqvnngksnpyfdnrqylelwklevlpgyqrgyralvefaksfkmpirtnprksaeFWNMnfk-----KYDMARDKGEDPLIHPDMD-----<br/> -----nitvrfvtendkegwqrlWKSQDFYEVSPDDLDLDFNFGRFLDPN-----IKMWAAVAVESSSEKILGMINFFNHMTT-----WDFKIKIYINDIYDENSRVKAGGKLIQFVYDEADKlgtPSVYWCTDeSNhrAQLLYVVGYPKAPKII-----LYK-----rkg</p> <p>-----r<br/> iigminffnhmttwdfkdkiiyndlyvdensrvkgaggkLIQFVYDEADKlgtpsvywctdesnhraqlllyvkvgypkiiylkrkgy-</p> <p><b>Proposed:</b> aliSize=122 (resi) RMSD=2.41 (Å)<br/> MTKVERLLIN-YKTLLEEFKFKKEY-GIQELSMLEELQDNIENDSTSPFYGIYFGDKLVARMSLYOVNGKSNPYFDNR-ODYLELWKEVLPGYONRCYGRAVEFAKS-FK---MPTRTNPRM-K-SAEFWNMNFKTVKYdmarkgedPLIHPDMD-drc<br/> NITVRFVTENDKEGWORLWQSYQDFYEVSPDDLDLDFNF-----FLDpnikMWAAVAVESSSEKILGMINFFNHMTT-----WDFKIKIYINDIYDENSRVKAGGKLIQFVYDEADKlgtPSVYWCTDeSNhrAQLLYVVGYPKAPKII-----LYKRGY-----</p>                        |
| 631 | <p>2pr1A<br/>(152)</p> <hr/> <p>1qsmD<br/>(152)</p> | C | 9.21  | <p><b>TM-align:</b> aliSize=123 (resi) RMSD=2.92 (Å)<br/> ---MTKVERLLIN-YKTLLEEFKFKKEY-GIQELSMLEELQDNIEND-STSPFYGIYFGDKLVARMSLYOVNGKSNPYFDNR-ODYLELWKEVLPGYONRCYGRAVEFAKS-FK---MPTRTNPR--MK-SAEFWNMNFKTVKYdmarDKGedpliwhpmdr----<br/> sedNITVRFVTENDKEGWORLWQSYQDFYEVSPDDLDLDFNF-----G--rFLDpnikMWAAVAVESSSEKILGMINFFNHMTT-----WDFKIKIYINDIYDENSRVKAGGKLIQFVYDEADKlgtPSVYWCTDeSNhrAQLLYVVGYPKAPKII-----LYK-----rkg</p> <p><b>SARST:</b> aliSize=121 (resi) RMSD=8.76 (Å)<br/> mtkverllin-----YKTLLEEFKFKKEYGQELSMLEELQDNIENDSTSPFYGIYFGDKLVARMSLYOVNGKSNPYFDNR-ODYLELWKEVLPGYONRCYGRAVEFAKS-FK---YGRALVEFAKSFKM-PIRTNPRMKSaeFWNMNFKTVKYdmarkgedPLIHPDMD-mdr<br/> -----sednitvrfvtendkegwqrlWKSQDFYEVSPDDLDLDFNFGRFLDPN-----IKMWAAVAVESSSEKILGMINFFNHMTT-----KIKIYINDIYDENSRVKAGGKLIQFVYDEADKlgtPSVYWCTDeSNhrAQLLYVVGYPKAPKII-----LYKRGY-----</p> <p><b>BLAST:</b> aliSize=9 (resi) iden=3.95% (6/152) simi=5.92% (9/152)<br/> mtkverllinyktleefkfkkeygiqelsmleelqdniendstspfygiyfgdklvarmslyqvnngksnpyfdnrqylelwklevlpgyqrgyralvefaksfkmpirtnprksaeFWNMnfk-----KYDMARDKGEDPLIHPDMD-----<br/> -----sednitvrfvtendkegwqrlWKSQDFYEVSPDDLDLDFNFGRFLDPN-----IKMWAAVAVESSSEKILGMINFFNHMTT-----WDFKIKIYINDIYDENSRVKAGGKLIQFVYDEADKlgtPSVYWCTDeSNhrAQLLYVVGYPKAPKII-----LYKRGY-----</p> <p>-----r<br/> sekiigminffnhmttwdfkdkiiyndlyvdensrvkgaggkLIQFVYDEADKlgtpsvywctdesnhraqlllyvkvgypkiiylkrkgy-</p> <p><b>Proposed:</b> aliSize=119 (resi) RMSD=2.18 (Å)<br/> ---MTKVERLLIN-YKTLLEEFKFKKEY-GIQELSMLEELQDNIENDSTSPFYGIYFGDKLVARMSLYOVNGKSNPYFDNR-ODYLELWKEVLPGYONRCYGRAVEFAKS-FK---MPTRTNPR-MK-SAEFWNMNFKTVKYdmarkgedPLIHPDMD-dmdrc<br/> sedNITVRFVTENDKEGWORLWQSYQDFYEVSPDDLDLDFNF-----G--rFLDpnikMWAAVAVESSSEKILGMINFFNHMTT-----WDFKIKIYINDIYDENSRVKAGGKLIQFVYDEADKlgtPSVYWCTDeSNhrAQLLYVVGYPKAPKII-----LYKRGY-----</p> |
| 632 | <p>2pr1A<br/>(152)</p> <hr/> <p>1s3zB<br/>(145)</p> | C | 8.97  | <p><b>TM-align:</b> aliSize=126 (resi) RMSD=2.94 (Å)<br/> mTKVERLLIN-YKTLLEEFKFKKEY-GIQELSMLEELQDNIEND-STSPFYGIYFGDKLVARMSLYOVNGKSNPYFDNR-ODYLELWKEVLPGYONRCYGRAVEFAKS-FK---M-PIRTNPR--MKS-AEFWNMNFKTVKYdmarDKGedpliwhpmdr----<br/> -MDIRQMNKThLEHWRGLRQLWPGHPDDAHLADG-----eILQadhLASFAMADGVAIGFADASIRHD-YVNGCD-SSPVVFLGIFVLPFRQGVAKQIIAAVQRwGTnkgCrEMASDTSpeNTIsQKVHqALGHEETE-----VIFY-----rkr</p> <p><b>SARST:</b> aliSize=123 (resi) RMSD=7.28 (Å)<br/> mtkverllin-----YKTLLEEFKFKKEYGQELSMLEELQDNIENDSTSPFYGIYFGDKLVARMSLYOVNGKSNPYFDNR-ODYLELWKEVLPGYONRCYGRAVEFAKS-FK---SFKM-PIRTNPRMKSaeFWNM-----MNFKTVKYdmarkgedPLIHPDMD-dmdrc<br/> -----mdirqmknkthLEHWRGLRQLWPGHPDDAHLADG-----LQAHLA-SFAMADGVAIGFADASIRHD-YVNGCDSSPVVFLGIFVLPFRQGVAKQIIAAVQRwGTnkgCrEMASDTSpeNTIsQKVHqALGHEETE-----RVIFYRKRc-----</p> <p><b>BLAST:</b> aliSize=10 (resi) iden=3.45% (5/145) simi=6.90% (10/145)<br/> mtkverllinyktleefkfkkeygiqelsmleelqdniendstspfygiyfgdklvarmslyqvnngksnpyfdnrqylelwklevlpgyqrgyralvefaksfkmpirtnprksaeFWNMnfk-----KYDMARDKGEDPLIHPDMD-----<br/> -----mdirqmknkthLEHWRGLRQLWPGHPDDAHLADG-----LQAHLA-SFAMADGVAIGFADASIRHD-YVNGCDSSPVVFLGIFVLPFRQGVAKQIIAAVQRwGTnkgCrEMASDTSpeNTIsQKVHqALGHEETE-----RVIFYRKRc-----</p> <p>-----qrgyralvefaksfkmpirtnprksaeFWNMnfk-----KYDMARDKGEDPLIHPDMD-----<br/> asdtspentisqkvhqaLgfeeteRVIFYRKRc</p> <p><b>Proposed:</b> aliSize=125 (resi) RMSD=2.28 (Å)<br/> mTKVERLLIN-YKTLLEEFKFKKEY-GIQELSMLEELQDNIENDSTSPFYGIYFGDKLVARMSLYOVNGKSNPYFDNR-ODYLELWKEVLPGYONRCYGRAVEFAKS-FK---M-PIRTNPR--MKS-AEFWNMNFKTVKYdmarkgedPLIHPDMD-dmdrc<br/> -MDIRQMNKThLEHWRGLRQLWPGHPDDAHLADG-----eILQadhLASFAMADGVAIGFADASIRHD-YVNGCD-SSPVVFLGIFVLPFRQGVAKQIIAAVQRwGTnkgCrEMASDTSpeNTIsQKVHqALGHEETE-----RVIFYRKRc-----</p>                                                            |

|     |                                       |   |       |                                                                                                                                                                                                                                                                                                                                                                                                                                                                                                                                                                                                                                                                                                                                                                                                                                                                                                                                                                                                                                                                                                                                                                                                                                                                                                                                                                                                                                                                                                                                                                                                                                                                                                                                                                                                                                              |
|-----|---------------------------------------|---|-------|----------------------------------------------------------------------------------------------------------------------------------------------------------------------------------------------------------------------------------------------------------------------------------------------------------------------------------------------------------------------------------------------------------------------------------------------------------------------------------------------------------------------------------------------------------------------------------------------------------------------------------------------------------------------------------------------------------------------------------------------------------------------------------------------------------------------------------------------------------------------------------------------------------------------------------------------------------------------------------------------------------------------------------------------------------------------------------------------------------------------------------------------------------------------------------------------------------------------------------------------------------------------------------------------------------------------------------------------------------------------------------------------------------------------------------------------------------------------------------------------------------------------------------------------------------------------------------------------------------------------------------------------------------------------------------------------------------------------------------------------------------------------------------------------------------------------------------------------|
| 633 | <p>2pr1A (152)</p> <p>1s5kA (153)</p> | C | 8.55  | <p><b>TM-align:</b> aliSize=127 (resi) RMSD=3.05 (Å)<br/> -----M--TKVERLLINyKTLLEEFKKF--KEYG--IOELSMLEELqdniieEnd-ST---SPFYGIYFGDKLVARMSLYOVNGKSNPYFDNRDYELWKLLEVLPGYONRGYGRALVEFAKS-FK---M-PTRTNPR--MKS-AEFWNKMNFKTKYdmarDKGEDpliwhpdmr----<br/> glvprGshMDIROMNKT--HLEHWRLRkQLWpGHPDDAHLADG-----E--eILqadhLASFIAMADGVAIGFADASIRHD-YVNGC--SSPVVFEGIFVLPSPFRQGVAKQIAAVQRWGTnkgCrEMASDTSpeNTIsQKVHQAALGFEETFR-----VIFY-----rkrC</p> <p><b>SARST:</b> aliSize=129 (resi) RMSD=7.73 (Å)<br/> mtk-----VERLLINyKTLLEEFKKF--KEYG--IOELSMLEELqdniieEnd-ST---SPFYGIYFGDKLVARMSLYOVNGKSNPYFDNRDYELWKLLEVLPGYONRGYGRALVEFAKS-FK---M-PTRTNPR--MKS-AEFWNKMNFKTKYdmarDKGEDPLIWHP-----dmdr<br/> -----glvprgshMDIROMNKT--HLEHWRLRkQLWpGHPDDAHLADG-----E--LQAHLA-SFIAMADGVAIGFADASIRHDYVNGC-DSSPVVFEGIFVLPSPFRQGVAKQIAAVQRWGTNKGCrEMASDTSPENTISQKV-----HQALGFEETFRVIFYrkrC----</p> <p><b>BLAST:</b> aliSize=14 (resi) iden=5.26% (8/152) simi=9.21% (14/152)<br/> mtkverllinyktleefkkfkeygiqelsmleelqdniieendstspfygiyfgdklvarmslyqvnqgknsnp-----YFDNRD---DYELWKL---LEVLPGY-----<br/> -----glvprgsHMDIROMNKT--HLEHWRLRkQLWpGHPDDAHLADG-----E--eILqadhLASFIAMADGVAIGFADASIRHDYVNGCDSSPVVFEGIFVLPSPFRQGVAKQIAAVQRWGTNKGCrEMASDTSPENTISQKVHQAALGFEETFRVIFYrkrC-----<br/> -----qnrqygralvefaksfkmpirtnprmkSAEFWNKMNFKTKYdmarDKGEDPLIWHPdmr<br/> masdtspentisqkvhqlgfeetFRVIFYrkrC-----</p> <p><b>Proposed:</b> aliSize=125 (resi) RMSD=2.28 (Å)<br/> -----M--TKVERLLINyKTLLEEFKKF--KEYG--IOELSMLEELqdniieEndST---SPFYGIYFGDKLVARMSLYOVNGKSNPYFDNRDYELWKLLEVLPGYONRGYGRALVEFAKS-FK---M-PTRTNPR--MKS-AEFWNKMNFKTKYdmarDKGEDPLIWHPD-mdrC<br/> glvprGshMDIROMNKT--HLEHWRLRkQLWpGHPDDAHLADG-----E--eILqadhLASFIAMADGVAIGFADASIRHD-YVNGC--SSPVVFEGIFVLPSPFRQGVAKQIAAVQRWGTnkgCrEMASDTSpeNTIsQKVHQAALGFEETFR-----RVIYRKRCC-----</p>                                     |
| 634 | <p>2pr1A (152)</p> <p>1ufhA (155)</p> | C | 5.26  | <p><b>TM-align:</b> aliSize=116 (resi) RMSD=3.31 (Å)<br/> MTKVERLLINyKTLLEEF--KKF--KEY-----GI--OELSMLEELqdniieEnds--TSPFYGIYFGDKLVARMSLYOVNGKSNPYFDNRDYELWKLLEVLPGYONRGYGRALVEFAKS-FK---M-PTRTNPRM--K--SAEFWNKMNFKTKYdmarDKGEDpliwhpdmr----<br/> TIMLTPMQ-T--EFRSYITYTtkHYAeekvkgatwlpedaqllSkqvFTDLL-PRG-----L---tpHHHLWLSKLnEKDILGWLWIHAEPHP-----QEAIFYDFGLYEPYRGKGYAKQALAAALDQaARsmgiRKLShVFAhNqtARKLYEQTGFOETI-D-----V-VM-----skkl</p> <p><b>SARST:</b> aliSize=115 (resi) RMSD=8.25 (Å)<br/> mtkverllin-----KTLLEEFKK--FKFYGIYELSMLEELODNIIEndSTSPFYGIYFGDKLVARMSLYOVNGKSNPYFDNRDYELWKLLEVLPGYONRGYGRALVEFAKS-FK---M-PTRTNPRM--K--SAEFWNKMNFKTKYdmarDKGEDPLIWHPD-----<br/> -----timltpmqteefrsyltyttkhYAEKVKAGtWLP--DAQLLSKQVFTDLL-PRGLEIPHHHLWLSKLnEKDILGWLWIHAEPHP-----AEPEHPQEAIFYD-FGLYEPYRGKGYAKQALAAALDQaARSMGIrKLShVFAHNQTARKLYeqTGFQETDVVmskkl-----</p> <p><b>BLAST:</b> aliSize=8 (resi) iden=2.63% (4/152) simi=5.26% (8/152)<br/> mtkverllinyktleefkkf-----KEYGTOELSM-----leelqdniieendst<br/> -----timltpmqteefrsyltyttkhyaekvkgatwlpedaqllskqvftdllprgletphhhlwslklnekdivgwlihaepHPqeaifydfglyepyrkgqyakaalaaaldqaarSMGIrKLShVFAHNqtarklyeqtGFQETDVVmskkl-----<br/> pfygiyfgdklvarmslyqvnqgknsnpfdnrqylelwklevlpgyqnrqygralvefaksfkmpirtnprmkSAEFWNKMNFKTKYdmarDKGEDpliwhpdmr</p> <p><b>Proposed:</b> aliSize=113 (resi) RMSD=2.42 (Å)<br/> MTKVERLLINyKTLLEEF--KKF--KEY-----YGIQEL--S-MleelqdniieendSTSPFYGIYFGDKLVARMSLYOVNGKSNPYFDNRDYELWKLLEVLPGYONRGYGRALVEFAKS-FK---M-PTRTNPRM--K--SAEFWNKMNFKTKYdmarDKGEDPLIWHP<br/> TIMLTPMQ-T--EFRSYITYTtkHYAeekvkgatwlpedaqllSkqvFTDlPrG-----LEtphhHLWLSKLnEKDILGWLWIHAEPHP-----QEAIFYDFGLYEPYRGKGYAKQALAAALDQaARsmgiRKLShVFAHNqtARKLYEQTGFOETI-----DVVMSKkl<br/> Dmdrc<br/> L----</p>                                                                                           |
| 635 | <p>2pr1A (152)</p> <p>1z4eA (150)</p> | C | 11.33 | <p><b>TM-align:</b> aliSize=122 (resi) RMSD=2.78 (Å)<br/> MTKVERLLINyKTLLEEFKKF--K--E--YGIQ-----EELSMLEELqdniieEnd--ST---SPFYGIYFGDKLVARMSLYOVNGKSNPYFDNRDYELWKLLEVLPGYONRGYGRALVEFAKS-FK---M-PTRTNPRM--K--SAEFWNKMNFKTKYdmarDKGEDpliwhpdmr----<br/> HVTIREATEG--DLEQMVHMLADVDLGrkrRER-yekplPVSIVRAF-----K--eiKkdknNELIVACNDEEIVGMLOVTFTPYL--T--YQGSWRATIEGVRTHSAARGQIISQLVCAIERakERGCHLIQLTtdkqRpdALRFYEQLGFKASHE-----G-LK-----mhf</p> <p><b>SARST:</b> aliSize=110 (resi) RMSD=5.49 (Å)<br/> mtkverllin-----YKTLLEEFKKFKE-----YGIQEL--S-MleelqdniieendstspFYGIYFGDKLVARMSLYOVNGKSNPYFDNRDYELWKLLEVLPGYONRGYGRALVEFAKS-FK---M-PTRTNPRM--K--SAEFWNKMNFKTKYdmarDKGEDPLIWHPD-----<br/> -----hvtireategdLEQMVHMLADVDLGrkrRER-yekplPVSIVRAF--K--eiKkdknNELIVACNDEEIVGMLOVTFTPYL--T--YQGSWRATIEGVRTHSAARGQIISQLVCAIERakERGCHLIQLTtdkqRpdALRFYEQLGFKASHEgklmhf-----</p> <p><b>BLAST:</b> aliSize=14 (resi) iden=5.33% (8/150) simi=9.33% (14/150)<br/> mtkverllinyktleefkkfkeygiqelsmleelqdniieendstspfygiyfgdklvarmslyqvnqgknsnpfdnrqylelwklevlpgyqnrqygralvefaksfkmpirtnprmkSAEFWNKMNFKTKYdmarDKGEDPLIWHPD-----<br/> -----hvtireategdLEQMVHMLADVDLGrkrRER-yekplPVSIVRAF--K--eiKkdknNELIVACNDEEIVGMLOVTFTPYL--T--YQGSWRATIEGVRTHSAARGQIISQLVCAIERakERGCHLIQLTtdkqRpdALRFYEQLGFKASHEgklmhf-----<br/> -----mpirtnprmkSAEFWNKMNFKTKYdmarDKGEDPLIWHPdmr<br/> cwaierakergchliqlttdkqRpdALRFYEQLGFKASHEgklmhf-----</p> <p><b>Proposed:</b> aliSize=118 (resi) RMSD=1.87 (Å)<br/> MTKVERLLINyKTLLEEFKKF--K--E--Y-----YGIQEL--S-MleelqdniieendstSPFYGIYFGDKLVARMSLYOVNGKSNPYFDNRDYELWKLLEVLPGYONRGYGRALVEFAKS-FK---M-PTRTNPRM--K--SAEFWNKMNFKTKYdmarDKGEDPLIWHPDmdrc<br/> HVTIREATEG--DLEQMVHMLADVDLGrkrRER-yekplPVSIVRAF--K--eiKkdknNELIVACNDEEIVGMLOVTFTPYL--T--YQGSWRATIEGVRTHSAARGQIISQLVCAIERakERGCHLIQLTtdkqRpdALRFYEQLGFKASHE-----HEGKMHF-----</p> |

|     |   |       |                                                                                                                                                                                                                                                                                                                                                                                                                                                                                                                                                                                                                                                                                                                                                                                                                                                                                                                                                                                                                                                                                                                                                                                                                                                                                                                                                                                                                                                                                                                                                                                                                                                                                                                                                                                                                           |
|-----|---|-------|---------------------------------------------------------------------------------------------------------------------------------------------------------------------------------------------------------------------------------------------------------------------------------------------------------------------------------------------------------------------------------------------------------------------------------------------------------------------------------------------------------------------------------------------------------------------------------------------------------------------------------------------------------------------------------------------------------------------------------------------------------------------------------------------------------------------------------------------------------------------------------------------------------------------------------------------------------------------------------------------------------------------------------------------------------------------------------------------------------------------------------------------------------------------------------------------------------------------------------------------------------------------------------------------------------------------------------------------------------------------------------------------------------------------------------------------------------------------------------------------------------------------------------------------------------------------------------------------------------------------------------------------------------------------------------------------------------------------------------------------------------------------------------------------------------------------------|
| 636 | C | 10.53 | <p><b>TM-align:</b> aliSize=126 (resi) RMSD=3.14 (Å)<br/> MTKVERLLIN-YKT-EEFKFKF--YGIqELSMLEE-qdNiin-DST---SPFYGIYFG-----DKLVARMSLYOVNGKsnpyfdNRODYIEWKLELPGYONRYRALVEFAKS-FK---M-PIRTNPR-MK--SAEWNKMNFKTV--KYDmarDKGEDpliwhpmdr-----<br/> KFVIRPATAAdCSDiRLIKELAkYymEEQ-VILTEKD1--L--dGFgehpfYHCLVAEVPkehwtpegHSIVGFAMYFTYDP-----WIGKLYEDFFMSDRGFGIASEILKNSQvAMrcrCsSMHFLVAeWNePSINYKRRGASDLsEEG---WRLF-----kidkeyllkmat</p> <p><b>SARST:</b> aliSize=121 (resi) RMSD=7.60 (Å)<br/> mtkverllin-----YKTL-EEFKFKF-----EYGIOEISMLEEODNIENDSTSpfYGIYFG--DKL-----VARMSLYOVNGKsnpyfdnRODYIEWKLELPGYONRYRALVEFAKSFKM-PIRTNPRMKSAAEFWNKMNFKTVKYDMARDKGEDPLIWH-----<br/> -----kfvirpataadcsdiRLIKELAYEYmeeqVILTEKD1LE---DGFGEHPFYHC--LVAEVPkeHWTpeghsiVGFAMYFTYDPW-----IGKLYEDFFMSDRGFGIigseILKNISQVMRCRCsSMHFLVAEWNepsINYKRRGASD---LSSSEGWRLFkIDkeyllk</p> <p>---pdmdr<br/> mat-----</p> <p><b>BLAST:</b> aliSize=60 (resi) iden=21.05% (32/152) simi=39.47% (60/152)<br/> mtkverllinyktleefkfkfkeyg-----OELSMLELODNI--NISTSPFYIY-IGDKVARM--SLYOVNKS---NPYFDNRODYI-EWKLE---VLPGYONRYRALVEFAKSFKPIR-TNPRMKSAAEFWNKMNFKTV--MNF--KTVKYDMARDKG-----<br/> -----kfvirpataadcsdiRLIKELAKYymEEQVILTEKD1LEDGFGEHPFYHCLVAEVPkeHWTPEGHsiVGFAMYFTYDPWIGKLYEDFFMSDRGFGIASEILKNSQVAMRCRCsSMHFLVAEWNepsINYKRRGASDLSSSEGWRLFkIDkeyllkmat</p> <p>---edpliwhpmdr<br/> at-----</p> <p><b>Proposed:</b> aliSize=129 (resi) RMSD=2.47 (Å)<br/> MTKVERLLI--NYKT-EEFKFKF--YGIqELSMLEE-qdNiin-ndST---SPFYGIYFG---G---DKLVARMSLYOVNGKsnpyfdNRODYIEWKLELPGYONRYRALVEFAKS-FK---M-PIRTNPR-MK--SAEWNKMNFKTV--KYDmarDKGEDPLIWHPMDR-----c<br/> KFVIRPATAAdCSDiRLIKELAkYymeeq-V---ILTEKD1-----d--GFgehpfYHCLVAEVPkehwtpegHSIVGFAMYFTYDP-----WIGKLYEDFFMSDRGFGIASEILKNSQvAMrcrCsSMHFLVAeWNePSINYKRRGASDLsEEG---GWRLFkIDKEYLLkmat</p>                              |
| 637 | C | 10.53 | <p><b>TM-align:</b> aliSize=126 (resi) RMSD=3.14 (Å)<br/> MTKVERLLIN-YKT-EEFKFKF--YGIqELSMLEE-qdNiin-DS---T-SPFYGIYFG-----DKLVARMSLYOVNGKsnpyfdNRODYIEWKLELPGYONRYRALVEFAKSF-K---M-PIRTNPR--MK--SAEWNKMNFKTV--KYDmarDKGEDpliwhpmdr-----<br/> KFVIRPATAAdCSDiRLIKELAkYymEEQ-VILTEKD1--L--dGFgehpfYHCLVAEVPkehwtpegHSIVGFAMYFTYDP-----WIGKLYEDFFMSDRGFGIASEILKNSQvAMrcrCsSMHFLVAeWNePSINYKRRGASDLsEEG---WRLF-----kidkeyllk</p> <p>----<br/> matee</p> <p><b>SARST:</b> aliSize=120 (resi) RMSD=6.77 (Å)<br/> mtkverllin-----YKTL-EEFKFKFKEYG---IOEISMLEEODNIENDSTSpfYGIYFG--DKL-----VARMSLYOVNGKsnpyfdnRODYIEWKLELPGYONRYRALVEFAKS----FKM-PIRTNPRMKSAAEFWNKMNFKTVKYDMARDKGEDPLIWH-----<br/> -----kfvirpataadcsdiRLIKELAYEYMEEqvILTEKD1L---EDGFGEHPFYHC--LVAEVPkeHWTpeghsiVGFAMYFTYDPW-----IGKLYEDFFMSDRGFGIASEILKNSQvAMRCRCsSMHFLVAEWNepsINYKRRGASD---LSSSEGWRLFkIDkeyllk</p> <p>----hpmdr<br/> matee-----</p> <p><b>BLAST:</b> aliSize=60 (resi) iden=21.05% (32/152) simi=39.47% (60/152)<br/> mtkverllinyktleefkfkfkeyg-----OELSMLELODNI--NISTSPFYIY-IGDKVARM--SLYOVNKS---NPYFDNRODYI-EWKLE---VLPGYONRYRALVEFAKSFKPIR-TNPRMKSAAEFWNKMNFKTV--MNF--KTVKYDMARDKG-----<br/> -----kfvirpataadcsdiRLIKELAKYymEEQVILTEKD1LEDGFGEHPFYHCLVAEVPkeHWTPEGHsiVGFAMYFTYDPWIGKLYEDFFMSDRGFGIASEILKNSQVAMRCRCsSMHFLVAEWNepsINYKRRGASDLSSSEGWRLFkIDkeyllkmat</p> <p>---edpliwhpmdr<br/> atee-----</p> <p><b>Proposed:</b> aliSize=130 (resi) RMSD=2.63 (Å)<br/> MTKVERLLI--NYKT-EEFKFKF--YGIqELSMLEE-qdNiin-ndST---SPFYGIYFG-----DKLVARMSLYOVNGKsnpyfdNRODYIEWKLELPGYONRYRALVEFAKS-FK---M-PIRTNPR-MK--SAEWNKMNFKTV--KYDmarDKGEDPLIWH---H-PMDR---c<br/> KFVIRPATAAdCSDiRLIKELAkYymee-QV---ILTEKD1-----d--GFgehpfYHCLVAEVPkehwtpegHSIVGFAMYFTYDP-----WIGKLYEDFFMSDRGFGIASEILKNSQvAMrcrCsSMHFLVAeWNePSINYKRRGASDLsEEG---WRLFkIDKEYLLkmat</p> |
| 638 | C | 9.87  | <p><b>TM-align:</b> aliSize=127 (resi) RMSD=3.22 (Å)<br/> -MTKVERLLIN-YKT-EEFKFKF--YGIqELSMLEE-qdNiin-DST---SPFYGIYFG-----DKLVARMSLYOVNGKsnpyfdNRODYIEWKLELPGYONRYRALVEFAKS-FK---M-PIRTNPR--M-KSAEWNKMNFKTV--KYDmarDKGEDpliwhpmdr-----<br/> akFVIRPATAAdCSDiRLIKELAkYymEEQ-VILTEKD1--L--dGFgehpfYHCLVAEVPkehwtpegHSIVGFAMYFTYDP-----WIGKLYEDFFMSDRGFGIASEILKNSQvAMrcrCsSMHFLVAeWNePSINYKRRGASDLsEEG---WRLF-----kidkeyllk</p> <p>----<br/> mate</p> <p><b>SARST:</b> aliSize=125 (resi) RMSD=17.64 (Å)<br/> mtkverllinyktleefkfkfkeygIQELSMLELODNIENDSTSpfYGIYFG-----DKLVARMSLYOVNGKsnpyfdNRODYIELWKLE-----VLPGYONRYRALVEFAKSFKM-PIRTNPRMKSAAEFWNKMNFKTVKYDMARDKGEDPLIWH-----<br/> ---akFVIRPATAAdCSDiRLIKELAKYymEEQVILTEKD1LE---EKdlledgfgEHPFYHCLVAEVPkeHWTPEGHsiVGFAMYFTYDPWIGKLYEDFFMSDRGFGIASEILKNSQVAMRCRCsSMHFLVAEWNepsINYKRRGASDLSSSEGWRLFkIDkeyllkmat</p> <p>hpmdr<br/> -----</p> <p><b>BLAST:</b> aliSize=60 (resi) iden=21.05% (32/152) simi=39.47% (60/152)<br/> mtkverllinyktleefkfkfkeyg-----OELSMLELODNI--NISTSPFYIY-IGDKVARM--SLYOVNKS---NPYFDNRODYI-EWKLE---VLPGYONRYRALVEFAKSFKPIR-TNPRMKSAAEFWNKMNFKTV--MNF--KTVKYDMARDKG-----<br/> -----akfvirpataadcsdiRLIKELAKYymEEQVILTEKD1LEDGFGEHPFYHCLVAEVPkeHWTPEGHsiVGFAMYFTYDPWIGKLYEDFFMSDRGFGIASEILKNSQVAMRCRCsSMHFLVAEWNepsINYKRRGASDLSSSEGWRLFkIDkeyllkmat</p> <p>---edpliwhpmdr<br/> mate-----</p> <p><b>Proposed:</b> aliSize=130 (resi) RMSD=2.56 (Å)<br/> -MTKVERLLI--NYKT-EEFKFKF--YGIqELSMLEE-qdNiin-ndST---SPFYGIYFG-----DKLVARMSLYOVNGKsnpyfdNRODYIEWKLELPGYONRYRALVEFAKS-FK---M-PIRTNPR-MK--SAEWNKMNFKTV--KYDmarDKGEDPLIWHPMDR-----c<br/> akFVIRPATAAdCSDiRLIKELAkYymee-QV---ILTEKD1-----d--GFgehpfYHCLVAEVPkehwtpegHSIVGFAMYFTYDP-----WIGKLYEDFFMSDRGFGIASEILKNSQvAMrcrCsSMHFLVAeWNePSINYKRRGASDLsEEG---WRLFkIDKEYLLkmat</p>                    |

|     |                |   |      |                                                                                                                                                                                                                                                                                                                                                                                                                                                                                                                                                                                                                                                                                                                                                                                                                                                                                                                                                                                                                                                                                                                                                                                                                                                                                                                                                                                                                                                                                                                                                                                                                                                                                                                                                                                                                                 |
|-----|----------------|---|------|---------------------------------------------------------------------------------------------------------------------------------------------------------------------------------------------------------------------------------------------------------------------------------------------------------------------------------------------------------------------------------------------------------------------------------------------------------------------------------------------------------------------------------------------------------------------------------------------------------------------------------------------------------------------------------------------------------------------------------------------------------------------------------------------------------------------------------------------------------------------------------------------------------------------------------------------------------------------------------------------------------------------------------------------------------------------------------------------------------------------------------------------------------------------------------------------------------------------------------------------------------------------------------------------------------------------------------------------------------------------------------------------------------------------------------------------------------------------------------------------------------------------------------------------------------------------------------------------------------------------------------------------------------------------------------------------------------------------------------------------------------------------------------------------------------------------------------|
| 639 | 2pr1A<br>(152) | C | 8.55 | <p>TM-align: aliSize=127 (resi) RMSD=3.35 (Å)<br/>pdetpmdpsllkevdsqntatfspaispHPgeglVLRPCTAdLNR-GFVVLgQLTETGVVPEQFM-KS--f--hMKksgdYYVTVEDvTlGQIVATATIIIEHKFI-----HScAKRGRVEDVVSDCECRGKQLGKL LSTLTLs kInCykITLECLPQNVGYKFGYTVSEEN---YM</p> <p>GEdpliwphdmdr---<br/>CR-----rfik</p> <p>SARST: aliSize=114 (resi) RMSD=5.70 (Å)<br/>mtkverlliny-----KTLEEFKKFKE--YGIOELSMLELqdnIIEndSTSpFYGIYFG--GDKLVARMSLYOVngksNPYFDNRDYLWLELPGYONRGYGRAVEFAKS---FKM-PIRTNPRMKSAEFWNKMNFKTV<br/>-----pdetpmdpsllkevdsqntatfspaispHPgeglVLRPCTAdLNR-GFVVLgQLTETGVVPEQFM-KS--f--hMKksgdYYVTVEDvTlGQIVATATIIIEHKFI-----HScAKRGRVEDVVSDCECRGKQLGKL LSTLTLs kInCykITLECLPQNVGYKFGYTVS</p> <p>KY-----dmarkgedpliwphdmdr<br/>EEnymcrrfrik-----</p> <p>BLAST: aliSize=20 (resi) iden=7.89% (12/152) simi=13.16% (20/152)<br/>mtkverllinyktleefkfkkeygiqelsmleelqdniiendstspfygiyfgdklvarmslyqvnngksnpyfdnrqdyelwklelpgyq-----NRGYGRAVEFAKSFKmpIRTNPRMKSAEFWNKMNFKTVKDM-----<br/>-----pdetpmdpsllkevdsqntatfspaispHPgeglVLRPCTAdLNR-GFVVLgQLTETGVVPEQFM-KS--f--hMKksgdYYVTVEDvTlGQIVATATIIIEHKFI-----HScAKRGRVEDVVSDCECRGKQLGKL LSTLTLs kInCykITLECLPQNVGYKFGYTVS</p> <p>-----ardkgedpliwphdmdr<br/>atatliiehkfihscakgrvedvvsdecrqkqlgkllistltskklncykitleclpqnvgfykkfgytvseEnymcrrfrik-----</p> <p>Proposed: aliSize=124 (resi) RMSD=2.32 (Å)<br/>pdetpmdpsllkevdsqntatfspaispHPgeglVLRPCTAdLNR-GFVVLgQLTE--Tgv--VS-PEQf---Mks---FehMkksgdYyVTVEDvTlGQIVATATIIIEHKFI-----HScAKRGRVEDVVSDCECRGKQLGKL LSTLTLs kInCykITLECLPQNVGYKFGYTVSE</p> <p>YdmarkgedPLIWHPDM-drc<br/>E-----NYMCRRFLKc---</p>                                                                                                                                                                                                                                                         |
|     | 2o28A<br>(182) |   |      | <p>TM-align: aliSize=127 (resi) RMSD=3.36 (Å)<br/>pdetpmdpsllkevdsqntatfspaispHPgeglVLRPCTAdLNR-GFVVLgQLTETGVVPEQFM-KS--f--hMKksgdYYVTVEDvTlGQIVATATIIIEHKFI-----HScAKRGRVEDVVSDCECRGKQLGKL LSTLTLs kInCykITLECLPQNVGYKFGYTVSEEN---YM</p> <p>GEdpliwphdmdr--<br/>CR-----rf</p> <p>SARST: aliSize=120 (resi) RMSD=7.62 (Å)<br/>mtkverlliny-----KTLEEFKKFKE--YGIOELSMLELQDNIIIEndSTSpFYGIYFG--GDKLVARMSLYOVngksNPYFDNRDYLWLELPGYONRGYGRAVEFAKSFKM-PIRTNPRMKSAEFWNKMNFKTV<br/>-----pdetpmdpsllkevdsqntatfspaispHPgeglVLRPCTAdLNR-GFVVLgQLTE--Tgv--VS-PEQf---Mks---FehMkksgdYyVTVEDvTlGQIVATATIIIEHKFI-----HScAKRGRVEDVVSDCECRGKQLGKL LSTLTLs kInCykITLECLPQNVGYKFGYTVS</p> <p>KYdmarkgedPLIWHP-dmdr<br/>E-----NYMCRRf---</p> <p>BLAST: aliSize=20 (resi) iden=7.89% (12/152) simi=13.16% (20/152)<br/>mtkverllinyktleefkfkkeygiqelsmleelqdniiendstspfygiyfgdklvarmslyqvnngksnpyfdnrqdyelwklelpgyq-----NRGYGRAVEFAKSFKmpIRTNPRMKSAEFWNKMNFKTVKDM-----<br/>-----pdetpmdpsllkevdsqntatfspaispHPgeglVLRPCTAdLNR-GFVVLgQLTETGVVPEQFM-KS--f--hMKksgdYYVTVEDvTlGQIVATATIIIEHKFI-----HScAKRGRVEDVVSDCECRGKQLGKL LSTLTLs kInCykITLECLPQNVGYKFGYTVS</p> <p>-----ardkgedpliwphdmdr<br/>atatliiehkfihscakgrvedvvsdecrqkqlgkllistltskklncykitleclpqnvgfykkfgytvseEnymcrrfrik-----</p> <p>Proposed: aliSize=122 (resi) RMSD=2.36 (Å)<br/>pdetpmdpsllkevdsqntatfspaispHPgeglVLRPCTAdLNR-GFVVLgQLTE--Tgv--VS-PEQf---Mks---FehMkksgdYyVTVEDvTlGQIVATATIIIEHKFI-----HScAKRGRVEDVVSDCECRGKQLGKL LSTLTLs kInCykITLECLPQNVGYKFGYTVSE</p> <p>YdmarkgedPLIWHPD-mdrc<br/>E-----NYMCRRfC---</p>                                                                                                                                                                                                                                                             |
| 641 | 2pr1A<br>(152) | C | 9.03 | <p>TM-align: aliSize=124 (resi) RMSD=2.88 (Å)<br/>mtKVERLLINyKTLIEEFKKF-KEY--GIqELSMLELqdniiend-ST---SPFYGIYFGDKLVARMSLYOVNgkSNPYFDNRDYLWLELPGYONRGYGRAVEFAKS-FK---M-PIRTNPR--MKS-AEFWNKMNFKTVKYdmarDKGEdpliwphdmdr---<br/>--DIRQMNKT-HLEHWRGLRkQLWpgHP-DDAHLADG-----E--eILqadhLASFIAMADGVAIGFADASIRHD-YVNGCD--SSPVVFLGIFVLPsFRQRGVAKQIAAVQRwGtnkgCrEMASDTSpeNTIsQKVHqALGFEETER-----VIFY-----rkrcc</p> <p>SARST: aliSize=121 (resi) RMSD=8.71 (Å)<br/>mtkverlliny-----YKTLIEEFKKFKEYGIOELSMLELQDNIIIEndSTSpFYGIYFGDKLVARMSLYOVngksNPYFDNRDYLWLELPGYONRGYGRAVEFAKSFKM-PIRTNPRMKSAEFWNKMNFKTVKYdMARDKGEDPLIWHP-----dmdr<br/>-----dirqmktHLEHWRGLRkQLWpgHPDDAHLADG--EiLQADH--LAS--FIAMADGVAIGFADASIR--HDYVNGCDSSPVVFLGIFVLPsFRQRGVAKQIAAVQRwGtnkgCrEMASDTSpeNTIsQKVHqALGFEETER-----VIFY-----rkrcc</p> <p>BLAST: aliSize=10 (resi) iden=3.47% (5/144) simi=6.94% (10/144)<br/>mtkverllinyktleefkfkkeygiqelsmleelqdniiendstspfygiyfgdklvarmslyqvnngksnpyfdnrqdyelwklelpgyq-----YKTLIEEFKKFKEYGIOELSMLELQDNIIIEndSTSpFYGIYFGDKLVARMSLYOVngksNPYFDNRDYLWLELPGYONRGYGRAVEFAKSFKM-PIRTNPRMKSAEFWNKMNFKTVKYdMARDKGEDPLIWHP-----dmdr<br/>-----dirqmktHLEHWRGLRkQLWpgHPDDAHLADG--EiLQADH--LAS--FIAMADGVAIGFADASIR--HDYVNGCDSSPVVFLGIFVLPsFRQRGVAKQIAAVQRwGtnkgCrEMASDTSpeNTIsQKVHqALGFEETER-----VIFY-----rkrcc</p> <p>-----qnrgygralvefaksfkmpirtnprmkSAEFWNKMNFKTVKYdmarkgedpliwphdmdr<br/>sdtspentisqkvhqalqfeetervifyrkrcc-----</p> <p>Proposed: aliSize=124 (resi) RMSD=2.27 (Å)<br/>mtKVERLLINyKTLIEEFKKF-KEY--GI--QELSMLELqdniiendst---SPFYGIYFGDKLVARMSLYOVNgkSNPYFDNRDYLWLELPGYONRGYGRAVEFAKS-FK---M-PIRTNPR--MKS-AEFWNKMNFKTVKYdmarkgedPLIWHPDM-drc<br/>--DIRQMNKT--HLEHWRGLRkQLWpgHPDDAHLADG--Ei-----LqadhLASFIAMADGVAIGFADASIRHD-YVNGCD--SSPVVFLGIFVLPsFRQRGVAKQIAAVQRwGtnkgCrEMASDTSpeNTIsQKVHqALGFEETER-----VIFY-----rkrcc</p> |
|     | 2vbqB<br>(144) |   |      |                                                                                                                                                                                                                                                                                                                                                                                                                                                                                                                                                                                                                                                                                                                                                                                                                                                                                                                                                                                                                                                                                                                                                                                                                                                                                                                                                                                                                                                                                                                                                                                                                                                                                                                                                                                                                                 |

|     |   |       |                                                                                                                                                                                                                                                                                                                                                                                                                                                                                                                                                                                                                                                                                                                                                                                                                                                                                                                                                                                                                                                                                                                                                                                                                                                                                                                                                                                                                                                                                                                                                                                                                                                                                                                                                                                                                                                                                                                                                                             |
|-----|---|-------|-----------------------------------------------------------------------------------------------------------------------------------------------------------------------------------------------------------------------------------------------------------------------------------------------------------------------------------------------------------------------------------------------------------------------------------------------------------------------------------------------------------------------------------------------------------------------------------------------------------------------------------------------------------------------------------------------------------------------------------------------------------------------------------------------------------------------------------------------------------------------------------------------------------------------------------------------------------------------------------------------------------------------------------------------------------------------------------------------------------------------------------------------------------------------------------------------------------------------------------------------------------------------------------------------------------------------------------------------------------------------------------------------------------------------------------------------------------------------------------------------------------------------------------------------------------------------------------------------------------------------------------------------------------------------------------------------------------------------------------------------------------------------------------------------------------------------------------------------------------------------------------------------------------------------------------------------------------------------------|
| 642 | C | 10.53 | <p><b>TM-align:</b> aliSize=127 (resi) RMSD=3.35 (Å)<br/>entplf s p s l i s p d v l a v l p a d y t i r p l c r s d y k r g y l d v l r v l t t v g d i n e e q w n s r y e w i r a r s d e y l l v v c d g e g r i v g t g s l v v e r k f i h s l g m v g h i e d i a v e k q g k k l g l r i i q a l d y v a e k v g c y k t i l d c s e a n e g y i c g f r a g l e m a h y y</p> <p><b>SARST:</b> aliSize=94 (resi) RMSD=6.73 (Å)<br/>mtkverllin-----YK-TLEEFKFKFKYGiqlsmleelqdniendstspFYGIYFD-KLVARMSLYOVNgksnPYFDNRQDYELWKLELPYINRGYRALVEFAKSF-K---M-PIRTNPRMKSAEFWNMNFKTKYDmarDKGE dpl i whp d m d r -----entplf s p s l i s p d v l a v l p a d y t i r p l c r s d y k r g y l d v l r v l t t v g d i n e e q w n s r y e w i r a r s d e y l l v v c d g e g r i v g t g s l v v e r k f i h s l g m v g h i e d i a v e k q g k k l g l r i i q a l d y v a e k v g c y k t i l d c s e a n e g y i c g f r a g l e m a h y y</p> <p><b>BLAST:</b> aliSize=8 (resi) iden=3.95% (6/152) simi=5.26% (8/152)<br/>mtkverllinyktleefkfkkeygiqlsmleelqdniendstspfygiyfgdklvarmslyqvnngksnpyfdnrqdyelwklvlpgyqnrqyralvefaksfkmpirtnprmsae-----entplf s p s l i s p d v l a v l p a d y t i r p l c r s d y k r g y l d v l r v l t t v g d i n e e q w n s r y e w i r a r s d e y l l v v c d g e g r i v g t g s l v v e r k f i h s l g m v g h i e d i a v e k q g k k l g l r i i q a l d y v a e k v g c y k t i l d c s e a n e g y i c g f r a g l e m a h y y</p> <p><b>Proposed:</b> aliSize=121 (resi) RMSD=2.34 (Å)<br/>entplf s p s l i s p d v l a v l p a d y t i r p l c r s d y k r g y l d v l r v l t t v g d i n e e q w n s r y e w i r a r s d e y l l v v c d g e g r i v g t g s l v v e r k f i h s l g m v g h i e d i a v e k q g k k l g l r i i q a l d y v a e k v g c y k t i l d c s e a n e g y i c g f r a g l e m a h y y</p> <p>HP-dmdrc<br/>Yc-----</p>                                                                         |
| 643 | C | 12.26 | <p><b>TM-align:</b> aliSize=131 (resi) RMSD=3.36 (Å)<br/>dsVTI RLmtehDLAMLYEWLNRS-HI-VE--W-----WG-GEEar--Pila---Dvq--EOYLPsvLAqeSVTPYIAM-NG-EPIIYAOSYVALGsgdgwweeTDPGVRGIDLSIANaSQLGKG--LGTKLVRALVELLFNDPEVTIOTDPSPSLRAIRCYEKAIFEROGTVTtpdGpavymvqtr<br/>-TIM-TP---QTEEFRSYLYTtkHyAekVkagtwlPEDAQL--lsk---qvft--dlLPRGLE-TP--HHHLWSLKNKDIVGWLWIHAEPH-----HPQAEAFYDF-GL-YEPYRgkgYAKQALALDQAARSMG-IRLRLSLHVFHQTARKLYEQTGFQEDVVM---S</p> <p>qafe---<br/>---kkl</p> <p><b>SARST:</b> aliSize=121 (resi) RMSD=11.08 (Å)<br/>dsVTI RLmtehDLAMLYEWLNRS-HI-VE--W-----WG-GEEar--Pila---Dvq--EOYLPsvLAqeSVTPYIAM-NG-EPIIYAOSYVALGsgdgwweeTDPGVRGIDLSIANaSQLGKG--LGTKLVRALVELLFNDPEVTIOTDPSPSLRAIRCYEKAIFEROGTVTtpdGpavymvqtr<br/>-TIM-TP---QTEEFRSYLYTtkHyAekVkagtwlPEDAQL--lsk---qvft--dlLPRGLE-TP--HHHLWSLKNKDIVGWLWIHAEPH-----HPQAEAFYDF-GL-YEPYRgkgYAKQALALDQAARSMG-IRLRLSLHVFHQTARKLYEQTGFQEDVVM---S</p> <p>P--AYIVOT-rqafe<br/>FqtdVMSKKI-----</p> <p><b>BLAST:</b> aliSize=29 (resi) iden=12.90% (20/155) simi=18.71% (29/155)<br/>dsvtlrImtehdlamlyewlnrshivevwggeeartladvqeqlpsvlaqesvtpyiamlNgepiyaqsyvalgsdg-----EETDpGVRGIDLSIANaSQLGKG--LGTKLVRALVELLFNDPEVTIOTDPSPSLRAIRCYEKAIFEROGTVTtpdGpavymvqtrqafe<br/>-tImtpmqteefrsyltyttkhyAekvkagtwlpedaql lskqvftdl lprgletphhlwslklnekdivGWLWIHAEPH-QQAEAFYDF-GL-YEPYRgkgYAKQALALDQAARSMG-IRLRLSLHVFHQTARKLYEQTGFQEDVVM---S</p> <p>RALVELLFNDPEVTIOTDPSPSLRAIRCYEKAIFEROGTVTtpdGpavymvqtrqafe<br/>ALDQAA-RSMGIRLRLSLHVFHQTARKLYEQTGFQEDVVMskkl-----</p> <p><b>Proposed:</b> aliSize=128 (resi) RMSD=2.56 (Å)<br/>dsVTI RLmtehDLAMLYEWLNRS-HI-VE--W-----WG-GEEar--Pila---Dvq--EOYLPsvLAqeSVTPYIAM-NG-EPIIYAOSYVALGsgdgwweeTDPGVRGIDLSIANaSQLGKG--LGTKLVRALVELLFNDPEVTIOTDPSPSLRAIRCYEKAIFEROGTVTtpdGpavymvqtrqafe<br/>-TIM-TP---QTEEFRSYLYTtkHyAekVkagtwlPEDAQL lskqvftdl lprgletphhlwslklnekdivGWLWIHAEPH-----HPQAEAFYDF-GL-YEPYRgkgYAKQALALDQAARSMG-IRLRLSLHVFHQTARKLYEQTGFQEDVVM---S</p> <p>YMVotrqafe<br/>MSK-----L--</p> |
| 644 | C | 12.75 | <p><b>TM-align:</b> aliSize=138 (resi) RMSD=3.40 (Å)<br/>DSVTI RLmtehDLAMLYEWLNRS-HI-VE--W-----WG-GEEar--Pila---Dvq--EOYLPsvLAqeSVTPYIAM-NG-EPIIYAOSYVALGsgdgwweeTDPGVRGIDLSIANaSQLGKG--LGTKLVRALVELLFNDPEVTIOTDPSPSLRAIRCYEKAIFEROGTVTtpdGpavymvqtrqafe<br/>EYTIVDGEE-YIE-EIKKLDREIsYsfvrfpisyeyeer--rHEELFES--L-SQGEHKFFVALnerSELLGHVVICIT-----DTVDYV-KIAYYDI-EV--VKWARglgCSALLRKAEWAKER-GAKKVLVRVEIDNP-VKWEER-GYKAR-ALI--ME-----kpi</p> <p><b>SARST:</b> aliSize=122 (resi) RMSD=11.29 (Å)<br/>dsvTLRLMtehDLAMLYEWLNRS-HI-VE--W-----WG-GEEar--Pila---Dvq--EOYLPsvLAqeSVTPYIAM-NG-EPIIYAOSYVALGsgdgwweeTDPGVRGIDLSIANaSQLGKG--LGTKLVRALVELLFNDPEVTIOTDPSPSLRAIRCYEKAIFEROGTVTtpdGpavymvqtrqafe<br/>---eYTIVDGEE-YIE-EIKKLDREIsYsfvrfpisyeyeer--rHEELFES--L-SQGEHKFFVALnerSELLGHVVICIT-----DTVDYV-KIAYYDI-EV--VKWARglgCSALLRKAEWAKER-GAKKVLVRVEIDNP-VKWEER-GYKAR-ALI--ME-----kpi</p> <p>VOT-rqafe<br/>EKPI-----</p> <p><b>BLAST:</b> aliSize=24 (resi) iden=8.72% (13/149) simi=16.11% (24/149)<br/>dsvtlrImtehdlamlyewlnrshivevwggeeartladvqeqlpsvlaqesvtpyiamlNgepiyaqsyvalgsdgwweeTDPGVRGIDLSIANaSQLGKG--LGTKLVRALVELLFNDPEVTIOTDPSPSLRAIRCYEKAIFEROGTVTtpdGpavymvqtrqafe<br/>-----EYTIVDGEE-YIE-EIKKLDREIsYsfvrfpisyeyeerheelfesllsqgehkffvalnersellghvvicitldtdvykiayiy</p> <p>dievkwargLGTCSALLRKAEWA-KERGAKKVLVRVEIDNP-VKWEER-GYKARALIMEKPI-----</p> <p><b>Proposed:</b> aliSize=138 (resi) RMSD=3.09 (Å)<br/>DSVTI RLmtehDLAMLYEWLNRS-HI-VE--W-----WG-GEEar--Pila---Dvq--EOYLPsvLAqeSVTPYIAM-NG-EPIIYAOSYVALGsgdgwweeTDPGVRGIDLSIANaSQLGKG--LGTKLVRALVELLFNDPEVTIOTDPSPSLRAIRCYEKAIFEROGTVTtpdGpavymvqtrqafe<br/>EYTIVDGEE-YIE-EIKKLDREIsYsfvrfpisyeyeer--rHEELFES--L-SQGEHKFFVALnerSELLGHVVICIT-----DTVDYV-KIAYYDI-EV--VKWARglgCSALLRKAEWAKER-GAKKVLVRVEIDNP-VKWEER-GYKARALIMEKPI-----</p>                                                                                                                                                                        |

|     |                                               |   |       |                                                                                                                                                                                                                                                                                                                                                                                                                                                                                                                                                                                                                                                                                                                                                                                                                                                                                                                                                                                                                                                                                                                                                                                                                                                                                                                                                                                                                                                                                                                                                                                                                                                                                                                                                |
|-----|-----------------------------------------------|---|-------|------------------------------------------------------------------------------------------------------------------------------------------------------------------------------------------------------------------------------------------------------------------------------------------------------------------------------------------------------------------------------------------------------------------------------------------------------------------------------------------------------------------------------------------------------------------------------------------------------------------------------------------------------------------------------------------------------------------------------------------------------------------------------------------------------------------------------------------------------------------------------------------------------------------------------------------------------------------------------------------------------------------------------------------------------------------------------------------------------------------------------------------------------------------------------------------------------------------------------------------------------------------------------------------------------------------------------------------------------------------------------------------------------------------------------------------------------------------------------------------------------------------------------------------------------------------------------------------------------------------------------------------------------------------------------------------------------------------------------------------------|
| 645 | <p>2pr8A<br/>(173)</p> <p>2vbqA<br/>(147)</p> | C | 14.29 | <p><b>TM-align: aliSize=139 (resi) RMSD=3.24 (Å)</b><br/>       DSVTLRLNTEHDAMLYEWLNRSHIvewwggEeaRPTIaDVOEAYL--PSVlAoEsvTPYtAmLNGEPtGyOSYVALGsgdGwEEETDPGRIDLS1ANasOLGKGLGtKLVRAVEL-LF--NDPEVTKIOTDPSFSLRAIRCYEKAFFROGTVtTPDgpaVymvqtrqafe---SHMDIQRNKNKTHLEHWRGLRKLQWLP-----GHP-DD--AHLADGeeiLQ--AD-HLASFTAMADQVAIGFADASIRHD----YVNGCDSSPVFLEGI-FV--LPSFRQR-GVAKQLAAVQRWgTNKGCREMASITSPENTISQKVHQUALGFETERVIFYR-----krcc</p> <p><b>SARST: aliSize=140 (resi) RMSD=7.02 (Å)</b><br/>       d-SVTLRLNTEHDAMLYEWLNRSHIvewwggEeaRPTIADVOEAYLPSVLAQESVTPYtAmLNGEPtGyOSYVALGSGDGWEEETDPGRIDLS1ANASQlGKGLGtKLVRAVELLFDNDPEVTKIOTDPSFSLRAIRCYEKAFFROGTVtTPDgpaVYMVOT-rqafe-sHMDIQRNKNKTHLEHWRGLRKLQWLP-----GHPDDAHLADG-EEIQAQDLHASFAMADQVAIGFADAS--LRHDYVNGCDSS--PVPVLEGI-fvIPSFQRGR-----VAQLIAVQRWGTNKGCREMASITSPENTISQKVHQUALGFETERVIFYRKR-----</p> <p><b>BLAST: aliSize=66 (resi) iden=23.81% (35/147) simi=44.90% (66/147)</b><br/>       dsvtlrlmtehdlamlyew-----LNRSITVE-----GHEARPTIADVOEAYLPSVLAQESVTPYtAmLNGEPtGyOSYVALGSGDGWEEETDPGRIDLS1ANASQlGKGLGtKLVRAVELLFDNDPEVTKIOTDPSFSLRAIRCYEKAFF-----rqgtvttpdgpa<br/>       -----shmdirqMKNKTHLEHWRGLRKLQWLP-----GHPDDAHLADGEE-----IQADHLASFAMADQVAIGFADASIRHDYVNGC-----DSSFPVfLEGI-FV--LPSFRQR-GVAKQLIAVQRWGTNKGCREMASITSPENTISQKVHQUALGFETERVIFYRKR-----vymvqtrqafe</p> <p><b>Proposed: aliSize=139 (resi) RMSD=2.78 (Å)</b><br/>       DSVTLRLNTEHDAMLYEWLNRSHIvewwggEeaRPTIADVOEAYLPSVLAQESVTPYtAmLNGEPtGyOSYVALGsgdGwEEETDPGRIDLS1ANASQlGKGLG-tKLVRAVELLFN--DP-EVTKIOTDPSFSLRAIRCYEKAFFROGTVtTPDgpaVYMVOTRqaFE-SHMDIQRNKNKTHLEHWRGLRKLQWLP-----H-PDD--AHLADGeeiLQAD--HLASFAMADQVAIGFADASIRHD----YVngCDSSPVFLEGI-FV--LPSFRQR-GVAKQLIAVQRWgTNKGCREMASITSPENTISQKVHQUALGFETERVIFYRKR-----</p> |
| 646 | <p>2qlrA<br/>(425)</p> <p>lahxA<br/>(396)</p> | N | 13.38 | <p><b>TM-align: aliSize=331 (resi) RMSD=3.06 (Å)</b><br/>       mnyarfitaasaarntpirtmtdilsrgpkmslsgglpnpnmpfkTavi-----mfenitaapadpigliadlfraderpgkiniglyydetgkipvLTSVKAEOYLLE-NEIT-KLGLDTPHFGRCTQELFGK-GSALINDK---RARTAOPLFGTGAIRVAADFLAKntSVKRrWVSNrSW</p> <p><b>SARST: aliSize=340 (resi) RMSD=13.08 (Å)</b><br/>       mnyarfitaasaarntpirtmtdilsrgpkmslsgglpnpnmpfkTavi-----mfenitaapadpigliadlfraderpgkiniglyydetgkipvLTSVKAEOYLLE-NEIT-KLGLDTPHFGRCTQELFGK-GSALINDK---RARTAOPLFGTGAIRVAADFLAKntSVKRrWVSNrSW</p> <p><b>BLAST: aliSize=83 (resi) iden=10.86% (43/396) simi=20.96% (83/396)</b><br/>       mnyarfitaasaarntpirtmtdilsrgpkmslsgglpnpnmpfkTavi-----mfenitaapadpigliadlfraderpgkiniglyydetgkipvLTSVKAEOYLLE-NEIT-KLGLDTPHFGRCTQELFGK-GSALINDK---RARTAOPLFGTGAIRVAADFLAKntSVKRrWVSNrSW</p> <p><b>Proposed: aliSize=354 (resi) RMSD=2.63 (Å)</b><br/>       mnyarfitaasaarntpirtmtdilsrgpkmslsgglpnpnmpfkTavi-----mfenitaapadpigliadlfraderpgkiniglyydetgkipvLTSVKAEOYLLE-NEIT-KLGLDTPHFGRCTQELFGK-GSALINDK---RARTAOPLFGTGAIRVAADFLAKntSVKRrWVSNrSW</p>                                                                                                                                                                                                                                                                                                                                                                                                                                                                                                                                                                                                                                                                          |
| 647 | <p>2qlrA<br/>(425)</p> <p>1aiaA<br/>(396)</p> | N | 13.89 | <p><b>TM-align: aliSize=332 (resi) RMSD=3.20 (Å)</b><br/>       mnyarfitaasaarntpirtmtdilsrgpkmslsgglpnpnmpfkTavi-----mfenitaapadpigliadlfraderpgkiniglyydetgkipvLTSVKAEOYLLE-NEIT-KLGLDTPHFGRCTQELFGK-GSALINDK---RARTAOPLFGTGAIRVAADFLAKntSVKRrWVSNrSW</p> <p><b>SARST: aliSize=328 (resi) RMSD=11.64 (Å)</b><br/>       mnyarfitaasaarntpirtmtdilsrgpkmslsgglpnpnmpfkTavi-----mfenitaapadpigliadlfraderpgkiniglyydetgkipvLTSVKAEOYLLE-NEIT-KLGLDTPHFGRCTQELFGK-GSALINDK---RARTAOPLFGTGAIRVAADFLAKntSVKRrWVSNrSW</p> <p><b>BLAST: aliSize=31 (resi) iden=5.81% (23/396) simi=7.83% (31/396)</b><br/>       mnyarfitaasaarntpirtmtdilsrgpkmslsgglpnpnmpfkTavi-----mfenitaapadpigliadlfraderpgkiniglyydetgkipvLTSVKAEOYLLE-NEIT-KLGLDTPHFGRCTQELFGK-GSALINDK---RARTAOPLFGTGAIRVAADFLAKntSVKRrWVSNrSW</p> <p><b>Proposed: aliSize=356 (resi) RMSD=2.71 (Å)</b><br/>       mnyarfitaasaarntpirtmtdilsrgpkmslsgglpnpnmpfkTavi-----mfenitaapadpigliadlfraderpgkiniglyydetgkipvLTSVKAEOYLLE-NEIT-KLGLDTPHFGRCTQELFGK-GSALINDK---RARTAOPLFGTGAIRVAADFLAKntSVKRrWVSNrSW</p>                                                                                                                                                                                                                                                                                                                                                                                                                                                                                                                                                                                                                                                                            |



|     |             |   |       |                                                                                                                                                                                                                                                                                                                                                                                                                                                                                                                                                                                                                                                                                                                                                                                                                                                                                                                        |
|-----|-------------|---|-------|------------------------------------------------------------------------------------------------------------------------------------------------------------------------------------------------------------------------------------------------------------------------------------------------------------------------------------------------------------------------------------------------------------------------------------------------------------------------------------------------------------------------------------------------------------------------------------------------------------------------------------------------------------------------------------------------------------------------------------------------------------------------------------------------------------------------------------------------------------------------------------------------------------------------|
| 648 | 2qlrA (425) | N | 12.63 | <p><b>TM-align:</b> aliSize=331 (resi) <b>RMSD=3.13 (Å)</b><br/>mnyarfi taasaarnpspirtmtidilsrgpkmslsgaglpnnpmpfkTavi<br/>-----mfeni taapadpigi adlfraderpgkinigivykdetgktpVLSVKKAEQYLLLE-NETT-KNLGIDIEFGRCTOELFGK-<br/>-----SALNDR-----RARTAOEFGTGA RVAADFLAKNtSVKR WWSN-SH</p> <p><b>SARST:</b> aliSize=336 (resi) <b>RMSD=12.82 (Å)</b><br/>mnyarfi taas-aARNPSPIRTMTDILSRGPKMSLSAGIPNPFKtavi<br/>-----mfeni taapadpigi adlfraderpgkinigivykdetgktpVLSVKKAEQYLLLE-NETT-KNLGIDIEFGRCTOELFGK-<br/>-----SALNDR-----RARTAOEFGTGA RVAADFLAKNtSVKR WWSN-SH</p> <p><b>BLAST:</b> aliSize=31 (resi) <b>iden=5.81% (23/396)</b> <b>simi=7.83% (31/396)</b><br/>mnyarf-----Yarf-----SRGPK-SM-AGIPNPFKtavi<br/>-----mfeni taas-aARNPSPIRTMTDILSRGPKMSLSAGIPNPFKtavi<br/>-----mfeni taapadpigi adlfraderpgkinigivykdetgktpVLSVKKAEQYLLLE-NETT-KNLGIDIEFGRCTOELFGK-<br/>-----SALNDR-----RARTAOEFGTGA RVAADFLAKNtSVKR WWSN-SH</p> |
|     | larhA (396) |   |       | <p><b>Proposed:</b> aliSize=355 (resi) <b>RMSD=2.72 (Å)</b><br/>mnyarfi taas-aARNPSPIRTMTDILSRGPKMSLSAGIPNPFKtavi<br/>-----mfeni taapadpigi adlfraderpgkinigivykdetgktpVLSVKKAEQYLLLE-NETT-KNLGIDIEFGRCTOELFGK-<br/>-----SALNDR-----RARTAOEFGTGA RVAADFLAKNtSVKR WWSN-SH</p>                                                                                                                                                                                                                                                                                                                                                                                                                                                                                                                                                                                                                                           |

|     |             |   |       |                                                                                                                                                                                                                                                                                                                                                                                                                                                                                                                                                                                                                                                                                                                                                                                                                                                                                                                        |
|-----|-------------|---|-------|------------------------------------------------------------------------------------------------------------------------------------------------------------------------------------------------------------------------------------------------------------------------------------------------------------------------------------------------------------------------------------------------------------------------------------------------------------------------------------------------------------------------------------------------------------------------------------------------------------------------------------------------------------------------------------------------------------------------------------------------------------------------------------------------------------------------------------------------------------------------------------------------------------------------|
| 649 | 2qlrA (425) | N | 12.88 | <p><b>TM-align:</b> aliSize=331 (resi) <b>RMSD=3.05 (Å)</b><br/>mnyarfi taasaarnpspirtmtidilsrgpkmslsgaglpnnpmpfkTavi<br/>-----mfeni taapadpigi adlfraderpgkinigivykdetgktpVLSVKKAEQYLLLE-NETT-KNLGIDIEFGRCTOELFGK-<br/>-----SALNDR-----RARTAOEFGTGA RVAADFLAKNtSVKR WWSN-SH</p> <p><b>SARST:</b> aliSize=346 (resi) <b>RMSD=14.51 (Å)</b><br/>mnyarfi taas-aARNPSPIRTMTDILSRGPKMSLSAGIPNPFKtavi<br/>-----mfeni taapadpigi adlfraderpgkinigivykdetgktpVLSVKKAEQYLLLE-NETT-KNLGIDIEFGRCTOELFGK-<br/>-----SALNDR-----RARTAOEFGTGA RVAADFLAKNtSVKR WWSN-SH</p> <p><b>BLAST:</b> aliSize=31 (resi) <b>iden=5.81% (23/396)</b> <b>simi=7.83% (31/396)</b><br/>mnyarf-----Yarf-----SRGPK-SM-AGIPNPFKtavi<br/>-----mfeni taas-aARNPSPIRTMTDILSRGPKMSLSAGIPNPFKtavi<br/>-----mfeni taapadpigi adlfraderpgkinigivykdetgktpVLSVKKAEQYLLLE-NETT-KNLGIDIEFGRCTOELFGK-<br/>-----SALNDR-----RARTAOEFGTGA RVAADFLAKNtSVKR WWSN-SH</p> |
|     | lariA (396) |   |       | <p><b>Proposed:</b> aliSize=353 (resi) <b>RMSD=2.61 (Å)</b><br/>mnyarfi taas-aARNPSPIRTMTDILSRGPKMSLSAGIPNPFKtavi<br/>-----mfeni taapadpigi adlfraderpgkinigivykdetgktpVLSVKKAEQYLLLE-NETT-KNLGIDIEFGRCTOELFGK-<br/>-----SALNDR-----RARTAOEFGTGA RVAADFLAKNtSVKR WWSN-SH</p>                                                                                                                                                                                                                                                                                                                                                                                                                                                                                                                                                                                                                                           |

|     |             |   |       |                                                                                                                                                                                                                                                                                                                                                                                                                                                                                                                                                                                                                                                                                                                                                                                                                                                                                                                        |
|-----|-------------|---|-------|------------------------------------------------------------------------------------------------------------------------------------------------------------------------------------------------------------------------------------------------------------------------------------------------------------------------------------------------------------------------------------------------------------------------------------------------------------------------------------------------------------------------------------------------------------------------------------------------------------------------------------------------------------------------------------------------------------------------------------------------------------------------------------------------------------------------------------------------------------------------------------------------------------------------|
| 650 | 2qlrA (425) | N | 13.38 | <p><b>TM-align:</b> aliSize=331 (resi) <b>RMSD=3.16 (Å)</b><br/>mnyarfi taasaarnpspirtmtidilsrgpkmslsgaglpnnpmpfkTavi<br/>-----mfeni taapadpigi adlfraderpgkinigivykdetgktpVLSVKKAEQYLLLE-NETT-KNLGIDIEFGRCTOELFGK-<br/>-----SALNDR-----RARTAOEFGTGA RVAADFLAKNtSVKR WWSN-SH</p> <p><b>SARST:</b> aliSize=348 (resi) <b>RMSD=14.77 (Å)</b><br/>mnyarfi taas-aARNPSPIRTMTDILSRGPKMSLSAGIPNPFKtavi<br/>-----mfeni taapadpigi adlfraderpgkinigivykdetgktpVLSVKKAEQYLLLE-NETT-KNLGIDIEFGRCTOELFGK-<br/>-----SALNDR-----RARTAOEFGTGA RVAADFLAKNtSVKR WWSN-SH</p> <p><b>BLAST:</b> aliSize=31 (resi) <b>iden=5.81% (23/396)</b> <b>simi=7.83% (31/396)</b><br/>mnyarf-----Yarf-----SRGPK-SM-AGIPNPFKtavi<br/>-----mfeni taas-aARNPSPIRTMTDILSRGPKMSLSAGIPNPFKtavi<br/>-----mfeni taapadpigi adlfraderpgkinigivykdetgktpVLSVKKAEQYLLLE-NETT-KNLGIDIEFGRCTOELFGK-<br/>-----SALNDR-----RARTAOEFGTGA RVAADFLAKNtSVKR WWSN-SH</p> |
|     | larsA (396) |   |       | <p><b>Proposed:</b> aliSize=354 (resi) <b>RMSD=2.67 (Å)</b><br/>mnyarfi taas-aARNPSPIRTMTDILSRGPKMSLSAGIPNPFKtavi<br/>-----mfeni taapadpigi adlfraderpgkinigivykdetgktpVLSVKKAEQYLLLE-NETT-KNLGIDIEFGRCTOELFGK-<br/>-----SALNDR-----RARTAOEFGTGA RVAADFLAKNtSVKR WWSN-SH</p>                                                                                                                                                                                                                                                                                                                                                                                                                                                                                                                                                                                                                                           |

|     |             |   |       |                                                                                                                                                                                                                                                                                                                                                                                                                                                                                                                                                                                                                                    |
|-----|-------------|---|-------|------------------------------------------------------------------------------------------------------------------------------------------------------------------------------------------------------------------------------------------------------------------------------------------------------------------------------------------------------------------------------------------------------------------------------------------------------------------------------------------------------------------------------------------------------------------------------------------------------------------------------------|
| 651 | 2qlrA (425) | N | 12.88 | <p><b>TM-align:</b> aliSize=332 (resi) RMSD=3.22 (Å)<br/>mnyarfttaasaarnpspirtmtidilsrgpkmsislaglgnpmmpfktavt-----TVENKRTLOFGEMMKRALQSPSAHPLLSWLKOLIKLHNPPTIHYPPSgqMDLGVSSOOGCKVFMITINPGDIDDFAYS</p> <p><b>SARST:</b> aliSize=311 (resi) RMSD=5.67 (Å)<br/>mnyarfttaasaarnpspirtmtidilsrgpkmsislaglgnpmmpfktavt-----TVENKRTLOFGEMMKRALQSPSAHPLLSWLKOLIKLHNPPTIHYPPSgqMDLGVSSOOGCKVFMITINPGDIDDFAYS</p> <p><b>BLAST:</b> aliSize=311 (resi) iden=5.81% (23/396) simi=7.83% (31/396)<br/>mnyarfttaasaarnpspirtmtidilsrgpkmsislaglgnpmmpfktavt-----TVENKRTLOFGEMMKRALQSPSAHPLLSWLKOLIKLHNPPTIHYPPSgqMDLGVSSOOGCKVFMITINPGDIDDFAYS</p> |
|     | 1asfA (396) |   |       | <p><b>Proposed:</b> aliSize=358 (resi) RMSD=2.78 (Å)<br/>mnyarfttaasaarnpspirtmtidilsrgpkmsislaglgnpmmpfktavt-----TVENKRTLOFGEMMKRALQSPSAHPLLSWLKOLIKLHNPPTIHYPPSgqMDLGVSSOOGCKVFMITINPGDIDDFAYS</p>                                                                                                                                                                                                                                                                                                                                                                                                                               |

|     |             |   |       |                                                                                                                                                                                                                                                                                                                                                                                                                                                                                                                                                                                                                                                                                    |
|-----|-------------|---|-------|------------------------------------------------------------------------------------------------------------------------------------------------------------------------------------------------------------------------------------------------------------------------------------------------------------------------------------------------------------------------------------------------------------------------------------------------------------------------------------------------------------------------------------------------------------------------------------------------------------------------------------------------------------------------------------|
| 652 | 2qlrA (425) | N | 20.68 | <p><b>TM-align:</b> aliSize=331 (resi) RMSD=2.39 (Å)<br/>mnyarfttaasaarnpspirtmtidilsrgpkmsislaglgnpmmpfktavt-----mrglsrrvqamkpsatvavnakalelrrqgvdvltatagepfdtpehvkEaARRAL-AQG-KTKIAAPGIGPELREALAEKFRRENGL-SVT-----PEETIIVVGKIAFNLQAALDQDEIVLSYVWYSY</p> <p><b>SARST:</b> aliSize=329 (resi) RMSD=6.24 (Å)<br/>mnyarfttaasaarnpspirtmtidilsrgpkmsislaglgnpmmpfktavt-----AVITVENKRTLOFGEMMKRALQSPSAHPLLSWLKOLIKLHNPPTIHYPPSgqMDLGVSSOOGCKVFMITINPGDIDDFAYS</p> <p><b>BLAST:</b> aliSize=167 (resi) iden=25.92% (99/382) simi=43.72% (167/382)<br/>mnyarfttaasaarnpspirtmtidilsrgpkmsislaglgnpmmpfktavt-----FEMMKRALQSPSAHPLLSWLKOLIKLHNPPTIHYPPSgqMDLGVSSOOGCKVFMITINPGDIDDFAYS</p> |
|     | 1b5oA (382) |   |       | <p><b>Proposed:</b> aliSize=359 (resi) RMSD=2.10 (Å)<br/>mnyarfttaasaarnpspirtmtidilsrgpkmsislaglgnpmmpfktavt-----LTAAGP-P-DFTDPEhvkEaARRAL-AQG-KTKIAAPGIGPELREALAEKFRRENGL-SVT-----TpeETIIVVGKIAFNLQAALDQDEIVLSYVWYSY</p>                                                                                                                                                                                                                                                                                                                                                                                                                                                         |

|     |             |   |       |                                                                                                                                                                                                                                                                                                                                                                                                                                                                                                                                                                                                                                                                               |
|-----|-------------|---|-------|-------------------------------------------------------------------------------------------------------------------------------------------------------------------------------------------------------------------------------------------------------------------------------------------------------------------------------------------------------------------------------------------------------------------------------------------------------------------------------------------------------------------------------------------------------------------------------------------------------------------------------------------------------------------------------|
| 653 | 2qlrA (425) | N | 20.42 | <p><b>TM-align:</b> aliSize=331 (resi) RMSD=2.39 (Å)<br/>mnyarfttaasaarnpspirtmtidilsrgpkmsislaglgnpmmpfktavt-----mrglsrrvqamkpsatvavnakalelrrqgvdvltatagepfdtpehvkEaARRAL-AQG-KTKIAAPGIGPELREALAEKFRRENGL-SVT-----PEETIIVVGKIAFNLQAALDQDEIVLSYVWYSY</p> <p><b>SARST:</b> aliSize=330 (resi) RMSD=4.92 (Å)<br/>mnyarfttaasaarnpspirtmtidilsrgpkmsislaglgnpmmpfktavt-----FNCKTLOFGEMMKRALQSPSAHPLLSWLKOLIKLHNPPTIHYPPSgqMDLGVSSOOGCKVFMITINPGDIDDFAYS</p> <p><b>BLAST:</b> aliSize=168 (resi) iden=25.92% (99/382) simi=43.98% (168/382)<br/>mnyarfttaasaarnpspirtmtidilsrgpkmsislaglgnpmmpfktavt-----FEMMKRALQSPSAHPLLSWLKOLIKLHNPPTIHYPPSgqMDLGVSSOOGCKVFMITINPGDIDDFAYS</p> |
|     | 1bkgA (382) |   |       | <p><b>Proposed:</b> aliSize=361 (resi) RMSD=2.00 (Å)<br/>mnyarfttaasaarnpspirtmtidilsrgpkmsislaglgnpmmpfktavt-----AVITVENKRTLOFGEMMKRALQSPSAHPLLSWLKOLIKLHNPPTIHYPPSgqMDLGVSSOOGCKVFMITINPGDIDDFAYS</p>                                                                                                                                                                                                                                                                                                                                                                                                                                                                       |

|     |                                                                                                           |   |       |                                                                                                                                                                                                                                                                                                                                                                                                                                                                                                                                                                                                                                                                                                                                                                                                                                                                                                                                                                                                                                                                                                                                                                                                                                                                                                                                                                                                                                                                                                                                                                                                                                                                                                                                                                                                                                                                                                                                                                                                                                                                                                                                                                                                                                                                                                                                    |
|-----|-----------------------------------------------------------------------------------------------------------|---|-------|------------------------------------------------------------------------------------------------------------------------------------------------------------------------------------------------------------------------------------------------------------------------------------------------------------------------------------------------------------------------------------------------------------------------------------------------------------------------------------------------------------------------------------------------------------------------------------------------------------------------------------------------------------------------------------------------------------------------------------------------------------------------------------------------------------------------------------------------------------------------------------------------------------------------------------------------------------------------------------------------------------------------------------------------------------------------------------------------------------------------------------------------------------------------------------------------------------------------------------------------------------------------------------------------------------------------------------------------------------------------------------------------------------------------------------------------------------------------------------------------------------------------------------------------------------------------------------------------------------------------------------------------------------------------------------------------------------------------------------------------------------------------------------------------------------------------------------------------------------------------------------------------------------------------------------------------------------------------------------------------------------------------------------------------------------------------------------------------------------------------------------------------------------------------------------------------------------------------------------------------------------------------------------------------------------------------------------|
| 654 | <div data-bbox="163 226 252 304">2qlrA (425)</div> <div data-bbox="163 550 252 627">1g4vA (396)</div>     | N | 12.63 | <p><b>TM-align: aliSize=331 (resi) RMSD=3.18 (Å)</b></p> <pre> mnyarfi taasaarnspirtmtidilsrgpkmsislaglgnpmnmpfktaiv-----mfeni taapadp1gladi fraaderpkinigivykedetgkpvLTSVKkaeQVLE-NEIT-KN LGIDITFEGRCTOELFGK-GSALNDK----RARTAQHPGTGGA RVAADFLAKntSVKRWVSNLWSP ----- SGLTOSHP-LGCNLIIVAS---ESGIVpSRDI-SRWKpedaknpqkNTpkfLTVVPGNNSLSRKKETVYARKYDFITE DPVYFQFNKfrvPTLSMDV-DGVRIRAD---FSTLSSGELTFLGP-----K-PLIFERVILHVOVSTLHSTFNOLMISQIHFWG-FEGMAH PNKSVNSaGLEVREYAYVYaenhTLDFAINSNEA-----QAGDVLFHGCCHAITDPIEIQWOTLACSVEKGWPLIFFAOGFARGLEEdaEGLRAFaAaMHKELVSSYSKNFGLYNEVACLVaadsetvdRAFESOMKAAIRANYSNPAGASVAVATISNDAIRAIWEQELTDMRQIORMROLFVNTLQEKGANRDFSPiKONNSFSGL----TTEOVLRLREEFVYAVAS-----GLNVNAGMIDNAPLCEAIVAVL----  VDRVLDVYSNOKDAITAADKWLtGLAEWH-VPAAGHVIKkgindVTEEKAVKMMLMpgnafyvdsapsyLRSFSSASFCQDVAFOVIAOIkesl ELTDMRQIORMROLFVNTLQEKGANRDFSPiKONNSFSGL----TTEOVLRLREEFVYAVAS-----GLNVNAGMIDNAPLCEAIVAVL----  SARST: aliSize=351 (resi) RMSD=14.86 (Å)</pre> <p><b>BLAST: aliSize=31 (resi) iden=5.81% (23/396) simi=7.83% (31/396)</b></p> <p>l fhgchaptgidptleqwtlaqlsvekgwlp1fdfaqgfargleedaeglrafaamhke1vassysknfglynervgactlvaadsetvdrafsqmkaairansnppahgasvatilsndalraiqeqltdmrqirrmqlfvntlqekganrdfsfiikqngmfsfglkeqvrlreef</p> <p>gvyavasgrvnvagtmaplceaiav1-----l1swkqlqiklhnptihyppsqqmldcvtsqsqqglckvfemiinpgdnvl1depaystlqslhplgenci invadesgipds1rdi1srwkpedaknpqkntpkflytpngnptgns1tserkkeiye1arkydf1iiedppyyflqfnk1</p> <p>rvptflsmdvgrviradsfsiissglrigfltgpkpliervilhiqvtlhpstfnqlmsqllheggeegfmahdvrdvfydnqkdalaaadkwltglawhvpagmflwkvkgingvkeleekavkmgvlmpgnafyvdsapsyprasfssapeqmdvafvqlaqlikes1</p> <p><b>Proposed: aliSize=353 (resi) RMSD=2.66 (Å)</b></p> <pre> mm-YARfi taasa-aKnPSRRTMTIDISRGPKMSISAGLGNP-----mfeni taapadp1gladi fraaderpkinigivykedetgkpvLTSVKkaeQVLE-NEIT-KN LGIDITFEGRCTOELFGK-GSALNDK----RARTAQHPGTGGA RVAADFLAKntsV-KRWVSNLWSPNHKSVNSaGLEVREYAYVYaenhT-L ----- IVpSRDI-LSR-wkpedaknpqkNTpkfLTVVPGNNSLSRKKETVYARKYDFITE DPVYFQFNKfrvPTLSMDV-DGVRIRAD---FSTLSSGELTFLGP-----K-PLIFERVILHVOVSTLHSTFNOLMISQIHFWG-FEGMAH VDRVLDVYSNOKDAITAADKWLtGLAEWH-VPAAGHVIKkgindVTEEKAVKMMLMpgnafyvdsapsyLRSFSSASFCQDVAFOVIAOIkesl LGLaFVH-VPAAGHVIKkgindVTEEKAVKMMLMpgnafyvdsapsyLRSFSSASFCQDVAFOVIAOIkesl GANR-DFsfiIKONNSFSGL----TTEOVLRLREEFVYAVAS-----GLNVNAGMIDNAPLCEAIVAVL----</pre>  |
| 655 | <div data-bbox="163 890 252 968">2qlrA (425)</div> <div data-bbox="163 1192 252 1270">1g4xA (396)</div>   | N | 13.13 | <p><b>TM-align: aliSize=332 (resi) RMSD=3.29 (Å)</b></p> <pre> mnyarfi taasaarnspirtmtidilsrgpkmsislaglgnpmnmpfktaiv-----mfeni taapadp1gladi fraaderpkinigivykedetgkpvLTSVKkaeQVLE-NEIT-KN LGIDITFEGRCTOELFGK-GSALNDK----RARTAQHPGTGGA RVAADFLAKntSVKRWVSNLWSP ----- SGLTOSHP-LGCNLIIVAS---ESGIVpSRDI-SRWKpedaknpqkNTpkfLTVVPGNNSLSRKKETVYARKYDFITE DPVYFQFNKfrvPTLSMDV-DGVRIRAD---FSTLSSGELTFLGP-----K-PLIFERVILHVOVSTLHSTFNOLMISQIHFWG-FEGMAH PNKSVNSaGLEVREYAYVYaenhTLDFAINSNEA-----QAGDVLFHGCCHAITDPIEIQWOTLACSVEKGWPLIFFAOGFARGLEEdaEGLRAFaAaMHKELVSSYSKNFGLYNEVACLVaadsetvdRAFESOMKAAIRANYSNPAGASVAVATISNDAIRAIWEQELTDMRQIORMROLFVNTLQEKGANRDFSPiKONNSFSGL----TTEOVLRLREEFVYAVAS-----GLNVNAGMIDNAPLCEAIVAVL----  VDRVLDVYSNOKDAITAADKWLtGLAEWH-VPAAGHVIKkgindVTEEKAVKMMLMpgnafyvdsapsyLRSFSSASFCQDVAFOVIAOIkesl ELTDMRQIORMROLFVNTLQEKGANRDFSPiKONNSFSGL----TTEOVLRLREEFVYAVAS-----GLNVNAGMIDNAPLCEAIVAVL----  SARST: aliSize=335 (resi) RMSD=14.07 (Å)</pre> <p><b>BLAST: aliSize=31 (resi) iden=5.81% (23/396) simi=7.83% (31/396)</b></p> <p>l fhgchaptgidptleqwtlaqlsvekgwlp1fdfaqgfargleedaeglrafaamhke1vassysknfglynervgactlvaadsetvdrafsqmkaairansnppahgasvatilsndalraiqeqltdmrqirrmqlfvntlqekganrdfsfiikqngmfsfglkeqvrlreef</p> <p>gvyavasgrvnvagtmaplceaiav1-----l1swkqlqiklhnptihyppsqqmldcvtsqsqqglckvfemiinpgdnvl1depaystlqslhplgenci invadesgipds1rdi1srwkpedaknpqkntpkflytpngnptgns1tserkkeiye1arkydf1iiedppyyflqfnk1</p> <p>rvptflsmdvgrviradsfsiissglrigfltgpkpliervilhiqvtlhpstfnqlmsqllheggeegfmahdvrdvfydnqkdalaaadkwltglawhvpagmflwkvkgingvkeleekavkmgvlmpgnafyvdsapsyprasfssapeqmdvafvqlaqlikes1</p> <p><b>Proposed: aliSize=352 (resi) RMSD=2.68 (Å)</b></p> <pre> mm-YARfi taasa-aKnPSRRTMTIDISRGPKMSISAGLGNP-----mfeni taapadp1gladi fraaderpkinigivykedetgkpvLTSVKkaeQVLE-NEIT-KN LGIDITFEGRCTOELFGK-GSALNDK----RARTAQHPGTGGA RVAADFLAKntsV-KRWVSNLWSPNHKSVNSaGLEVREYAYVYaenhT-L ----- IVpSRDI-LSR-wkpedaknpqkNTpkfLTVVPGNNSLSRKKETVYARKYDFITE DPVYFQFNKfrvPTLSMDV-DGVRIRAD---FSTLSSGELTFLGP-----K-PLIFERVILHVOVSTLHSTFNOLMISQIHFWG-FEGMAH VDRVLDVYSNOKDAITAADKWLtGLAEWH-VPAAGHVIKkgindVTEEKAVKMMLMpgnafyvdsapsyLRSFSSASFCQDVAFOVIAOIkesl LGLaFVH-VPAAGHVIKkgindVTEEKAVKMMLMpgnafyvdsapsyLRSFSSASFCQDVAFOVIAOIkesl GANR-DFsfiIKONNSFSGL----TTEOVLRLREEFVYAVAS-----GLNVNAGMIDNAPLCEAIVAVL----</pre>  |
| 656 | <div data-bbox="163 1520 252 1598">2qlrA (425)</div> <div data-bbox="163 1822 252 1900">1g7wA (396)</div> | N | 13.89 | <p><b>TM-align: aliSize=332 (resi) RMSD=3.27 (Å)</b></p> <pre> mnyarfi taasaarnspirtmtidilsrgpkmsislaglgnpmnmpfktaiv-----mfeni taapadp1gladi fraaderpkinigivykedetgkpvLTSVKkaeQVLE-NEIT-KN LGIDITFEGRCTOELFGK-GSALNDK----RARTAQHPGTGGA RVAADFLAKntSVKRWVSNLWSP ----- SGLTOSHP-LGCNLIIVAS---ESGIVpSRDI-SRWKpedaknpqkNTpkfLTVVPGNNSLSRKKETVYARKYDFITE DPVYFQFNKfrvPTLSMDV-DGVRIRAD---FSTLSSGELTFLGP-----K-PLIFERVILHVOVSTLHSTFNOLMISQIHFWG-FEGMAH PNKSVNSaGLEVREYAYVYaenhTLDFAINSNEA-----QAGDVLFHGCCHAITDPIEIQWOTLACSVEKGWPLIFFAOGFARGLEEdaEGLRAFaAaMHKELVSSYSKNFGLYNEVACLVaadsetvdRAFESOMKAAIRANYSNPAGASVAVATISNDAIRAIWEQELTDMRQIORMROLFVNTLQEKGANRDFSPiKONNSFSGL----TTEOVLRLREEFVYAVAS-----GLNVNAGMIDNAPLCEAIVAVL----  VDRVLDVYSNOKDAITAADKWLtGLAEWH-VPAAGHVIKkgindVTEEKAVKMMLMpgnafyvdsapsyLRSFSSASFCQDVAFOVIAOIkesl ELTDMRQIORMROLFVNTLQEKGANRDFSPiKONNSFSGL----TTEOVLRLREEFVYAVAS-----GLNVNAGMIDNAPLCEAIVAVL----  SARST: aliSize=330 (resi) RMSD=12.17 (Å)</pre> <p><b>BLAST: aliSize=31 (resi) iden=5.81% (23/396) simi=7.83% (31/396)</b></p> <p>l fhgchaptgidptleqwtlaqlsvekgwlp1fdfaqgfargleedaeglrafaamhke1vassysknfglynervgactlvaadsetvdrafsqmkaairansnppahgasvatilsndalraiqeqltdmrqirrmqlfvntlqekganrdfsfiikqngmfsfglkeqvrlreef</p> <p>gvyavasgrvnvagtmaplceaiav1-----l1swkqlqiklhnptihyppsqqmldcvtsqsqqglckvfemiinpgdnvl1depaystlqslhplgenci invadesgipds1rdi1srwkpedaknpqkntpkflytpngnptgns1tserkkeiye1arkydf1iiedppyyflqfnk1</p> <p>rvptflsmdvgrviradsfsiissglrigfltgpkpliervilhiqvtlhpstfnqlmsqllheggeegfmahdvrdvfydnqkdalaaadkwltglawhvpagmflwkvkgingvkeleekavkmgvlmpgnafyvdsapsyprasfssapeqmdvafvqlaqlikes1</p> <p><b>Proposed: aliSize=350 (resi) RMSD=2.77 (Å)</b></p> <pre> mm-YARfi taasa-aKnPSRRTMTIDISRGPKMSISAGLGNP-----mfeni taapadp1gladi fraaderpkinigivykedetgkpvLTSVKkaeQVLE-NEIT-KN LGIDITFEGRCTOELFGK-GSALNDK----RARTAQHPGTGGA RVAADFLAKntsV-KRWVSNLWSPNHKSVNSaGLEVREYAYVYaenhT-L ----- EAGIVpSRDI-SRWKpedaknpqkNTpkfLTVVPGNNSLSRKKETVYARKYDFITE DPVYFQFNKfrvPTLSMDV-DGVRIRAD---FSTLSSGELTFLGP-----K-PLIFERVILHVOVSTLHSTFNOLMISQIHFWG-FEGMAH VDRVLDVYSNOKDAITAADKWLtGLAEWH-VPAAGHVIKkgindVTEEKAVKMMLMpgnafyvdsapsyLRSFSSASFCQDVAFOVIAOIkesl LGLaFVH-VPAAGHVIKkgindVTEEKAVKMMLMpgnafyvdsapsyLRSFSSASFCQDVAFOVIAOIkesl GANR-DFsfiIKONNSFSGL----TTEOVLRLREEFVYAVAS-----GLNVNAGMIDNAPLCEAIVAVL----</pre> |



|     |             |   |       |                                                                                                                                                                                                                                                                                                                                                                                                                                                                                                                                                        |
|-----|-------------|---|-------|--------------------------------------------------------------------------------------------------------------------------------------------------------------------------------------------------------------------------------------------------------------------------------------------------------------------------------------------------------------------------------------------------------------------------------------------------------------------------------------------------------------------------------------------------------|
| 660 | 2qlrA (425) | N | 13.84 | <p><b>TM-align: aliSize=309 (resi) RMSD=3.17 (Å)</b><br/>mnyarfitaasaarnspirtmtidilsrgpksmslaglppnmfptktavi-----VengKTIQfgeemkralQSPSaGIPeLlSWLKOiKlHnptIhyppsqgMDLVSISOCCKVFFMIIN--NPGDNLDFAYSTLQSLHPL-LGCNIINVAS--ESGIvpsRDL--SRWkpedaknpqkNTPKfLYTPVNGNPTNSLTSRrKKELYEARKYDFLIEDEYFQFNKFRVPTLMSVDVGRVIRADSF--I--SSGLLITFLGP-----K-PLIFRVILHVOVSTLHSTFNOLMISQIFHWG-EGFMAHVDRVIDFYSNOKDAILAAADKWITglawhVPAAGMFWIKVgIndvKEL-TEFKA-VKMG-VLMLPGAFY--vdssapSPYASFSS-ASPFMDVFOVLA-likesl<br/>S-AvK--S1WD-QgTLIRDOQKQPsl-----GCRITVGTIEESORVIDARAE--V--</p> |
|     | lijiA (354) |   |       | <p><b>SARST: aliSize=339 (resi) RMSD=12.41 (Å)</b><br/>mnyarfitaasaarnspirtmtidilsrgpksmslaglppnmfptktavi-----VengKTIQfgeemkralQSPSaGIPeLlSWLKOiKlHnptIhyppsqgMDLVSISOCCKVFFMIIN--NPGDNLDFAYSTLQSLHPL-LGCNIINVAS--ESGIvpsRDL--SRWkpedaknpqkNTPKfLYTPVNGNPTNSLTSRrKKELYEARKYDFLIEDEYFQFNKFRVPTLMSVDVGRVIRADSF--I--SSGLLITFLGP-----K-PLIFRVILHVOVSTLHSTFNOLMISQIFHWG-EGFMAHVDRVIDFYSNOKDAILAAADKWITglawhVPAAGMFWIKVgIndvKEL-TEFKA-VKMG-VLMLPGAFY--vdssapSPYASFSS-ASPFMDVFOVLA-likesl<br/>S-AvK--S1WD-QgTLIRDOQKQPsl-----GCRITVGTIEESORVIDARAE--V--</p>   |

|     |             |   |       |                                                                                                                                                                                                                                                                                                                                                                                                                                                                                                                                                      |
|-----|-------------|---|-------|------------------------------------------------------------------------------------------------------------------------------------------------------------------------------------------------------------------------------------------------------------------------------------------------------------------------------------------------------------------------------------------------------------------------------------------------------------------------------------------------------------------------------------------------------|
| 661 | 2qlrA (425) | N | 13.38 | <p><b>TM-align: aliSize=332 (resi) RMSD=3.26 (Å)</b><br/>mnyarfitaasaarnspirtmtidilsrgpksmslaglppnmfptktavi-----mfenitaapadpigliadlfraderpgkinligfykdeigtktptLTSVKAEOYLLENETTKN LGIDLIEFGRCTOEELFGK-GSAL-NDK-----RARTAOPIGTGARVAADFLAKntSVKRWWSNLSWPNHKSVENSaGLEVREYAYYaenHTLDF--LAINSN-EA-----QAGDVLPHGCCCHLIDPFLQWOTLAQSVKGMPLIFAFQGFARGLLEDAEGRAFAMHKELVSSYKNgLYNERVACLVaadsetvDRAFOSMKAARANYSNPAHGASVATLISNDALRAIWEQELTDMRQRIORMROLFVNTLOEKANDPSPFIKONMSESGI-----TK--OVLRLREEFYAVAS--GNVAGMIDNAPLCEAIVAVI-----</p>                               |
|     | lix6A (396) |   |       | <p><b>SARST: aliSize=329 (resi) RMSD=12.51 (Å)</b><br/>mnyarfitaasaarnspirtmtidilsrgpksmslaglppnmfptktavi-----VengKTIQfgeemkralQSPSaGIPeLlSWLKOiKlHnptIhyppsqgMDLVSISOCCKVFFMIIN--NPGDNLDFAYSTLQSLHPL-LGCNIINVAS--ESGIvpsRDL--SRWkpedaknpqkNTPKfLYTPVNGNPTNSLTSRrKKELYEARKYDFLIEDEYFQFNKFRVPTLMSVDVGRVIRADSF--I--SSGLLITFLGP-----K-PLIFRVILHVOVSTLHSTFNOLMISQIFHWG-EGFMAHVDRVIDFYSNOKDAILAAADKWITglawhVPAAGMFWIKVgIndvKEL-TEFKA-VKMG-VLMLPGAFY--vdssapSPYASFSS-ASPFMDVFOVLA-likesl<br/>S-AvK--S1WD-QgTLIRDOQKQPsl-----GCRITVGTIEESORVIDARAE--V--</p> |

|     |             |   |       |                                                                                                                                                                                                                                                                                                                                                                                                                                                                                                                                                      |
|-----|-------------|---|-------|------------------------------------------------------------------------------------------------------------------------------------------------------------------------------------------------------------------------------------------------------------------------------------------------------------------------------------------------------------------------------------------------------------------------------------------------------------------------------------------------------------------------------------------------------|
| 662 | 2qlrA (425) | N | 13.13 | <p><b>TM-align: aliSize=332 (resi) RMSD=3.28 (Å)</b><br/>mnyarfitaasaarnspirtmtidilsrgpksmslaglppnmfptktavi-----mfenitaapadpigliadlfraderpgkinligfykdeigtktptLTSVKAEOYLLENETTKN LGIDLIEFGRCTOEELFGK-GSAL-NDK-----RARTAOPIGTGARVAADFLAKntSVKRWWSNLSWPNHKSVENSaGLEVREYAYYaenHTLDF--LAINSN-EA-----QAGDVLPHGCCCHLIDPFLQWOTLAQSVKGMPLIFAFQGFARGLLEDAEGRAFAMHKELVSSYKNgLYNERVACLVaadsetvDRAFOSMKAARANYSNPAHGASVATLISNDALRAIWEQELTDMRQRIORMROLFVNTLOEKANDPSPFIKONMSESGI-----TK--OVLRLREEFYAVAS--GNVAGMIDNAPLCEAIVAVI-----</p>                               |
|     | lix8A (396) |   |       | <p><b>SARST: aliSize=334 (resi) RMSD=12.27 (Å)</b><br/>mnyarfitaasaarnspirtmtidilsrgpksmslaglppnmfptktavi-----VengKTIQfgeemkralQSPSaGIPeLlSWLKOiKlHnptIhyppsqgMDLVSISOCCKVFFMIIN--NPGDNLDFAYSTLQSLHPL-LGCNIINVAS--ESGIvpsRDL--SRWkpedaknpqkNTPKfLYTPVNGNPTNSLTSRrKKELYEARKYDFLIEDEYFQFNKFRVPTLMSVDVGRVIRADSF--I--SSGLLITFLGP-----K-PLIFRVILHVOVSTLHSTFNOLMISQIFHWG-EGFMAHVDRVIDFYSNOKDAILAAADKWITglawhVPAAGMFWIKVgIndvKEL-TEFKA-VKMG-VLMLPGAFY--vdssapSPYASFSS-ASPFMDVFOVLA-likesl<br/>S-AvK--S1WD-QgTLIRDOQKQPsl-----GCRITVGTIEESORVIDARAE--V--</p> |

|     |                                                                                                           |         |                                                                                                                                                                                                                                                                                                                                                                                                                                                                                                                                                                                                                                                                                                                                                                                                                                                                                                                                                                                                                                                                                                                                                                                                                                                                                                                                                                                                                                                                                                                                                                                                      |
|-----|-----------------------------------------------------------------------------------------------------------|---------|------------------------------------------------------------------------------------------------------------------------------------------------------------------------------------------------------------------------------------------------------------------------------------------------------------------------------------------------------------------------------------------------------------------------------------------------------------------------------------------------------------------------------------------------------------------------------------------------------------------------------------------------------------------------------------------------------------------------------------------------------------------------------------------------------------------------------------------------------------------------------------------------------------------------------------------------------------------------------------------------------------------------------------------------------------------------------------------------------------------------------------------------------------------------------------------------------------------------------------------------------------------------------------------------------------------------------------------------------------------------------------------------------------------------------------------------------------------------------------------------------------------------------------------------------------------------------------------------------|
| 663 | <div data-bbox="172 226 243 298">2qlrA (425)</div> <div data-bbox="172 550 243 621">1j32A (388)</div>     | N 16.49 | <p><b>TM-align:</b> aliSize=336 (resi) RMSD=2.55 (Å)<br/> mnyarfi taasaarnpspirtmt dilsrgpkmsislagglpnpmfptkavi <b>TVENGKTI-OFGEAMMKRA</b>LOVSPSAIPFLSWKLOIKLHNpPTIHyppsqgMDLCSOGLCKVEMINPNDNLIDFAVSGTLOSTHPLGCNIINVASDE--SG--TVYDLSI<br/> -----mkiarvesvpsmtliidakakamkaegidvcsfsagepdlnfPKHIVEAA<b>KAAL-EOG-K</b>TRIGAGGERREALAKLORDNGL--CYG-----ADNLTINNGKSTFNLMMLAMERDEIIPAFWVSYTP</p> <p><b>SARST:</b> aliSize=361 (resi) RMSD=12.87 (Å)<br/> mnyarfi taasaarnpspirtmt dilsrgpkmsislagglpnpmfptkavi <b>TVENGKTI-OFGEAMMKRA</b>LOVSPSAIPFLSWKLOIKLHNpPTIHyppsqgMDLCSOGLCKVEMINPNDNLIDFAVSGTLOSTHPLGCNIINVASDE--SG--TVYDLSI<br/> -----mkiarvesvpsmtliidakakamkaegidvcsfsagepdlnfPKHIVEAA<b>KAAL-EOG-K</b>TRIGAGGERREALAKLORDNGL--CYG-----ADNLTINNGKSTFNLMMLAMERDEIIPAFWVSYTP</p> <p><b>BLAST:</b> aliSize=165 (resi) iden=24.74% (96/388) simi=42.53% (165/388)<br/> mnyarfi taasaarnpspirtmt dilsrgpkmsislagglpnpmfptkavi <b>TVENGKTI-OFGEAMMKRA</b>LOVSPSAIPFLSWKLOIKLHNpPTIHyppsqgMDLCSOGLCKVEMINPNDNLIDFAVSGTLOSTHPLGCNIINVASDE--SG--TVYDLSI<br/> -----mkiarvesvpsmtliidakakamkaegidvcsfsagepdlnfPKHIVEAA<b>KAAL-EOG-K</b>TRIGAGGERREALAKLORDNGL--CYG-----ADNLTINNGKSTFNLMMLAMERDEIIPAFWVSYTP</p> <p><b>Proposed:</b> aliSize=366 (resi) RMSD=2.07 (Å)<br/> mnyarfi taasaarnpspirtmt dilsrgpkmsislagglpnpmfptkavi <b>TVENGKTI-OFGEAMMKRA</b>LOVSPSAIPFLSWKLOIKLHNpPTIHyppsqgMDLCSOGLCKVEMINPNDNLIDFAVSGTLOSTHPLGCNIINVASDE--SG--TVYDLSI<br/> -----mkiarvesvpsmtliidakakamkaegidvcsfsagepdlnfPKHIVEAA<b>KAAL-EOG-K</b>TRIGAGGERREALAKLORDNGL--CYG-----ADNLTINNGKSTFNLMMLAMERDEIIPAFWVSYTP</p>  |
| 664 | <div data-bbox="172 875 243 947">2qlrA (425)</div> <div data-bbox="172 1194 243 1266">1o4sA (375)</div>   | N 18.67 | <p><b>TM-align:</b> aliSize=327 (resi) RMSD=2.59 (Å)<br/> mnyarfi taasaarnpspirtmt dilsrgpkmsislagglpnpmfptkavi <b>TVENGKTI-OFGEAMMKRA</b>LOVSPSAIPFLSWKLOIKLHNpPTIHyppsqgMDLCSOGLCKVEMINPNDNLIDFAVSGTLOSTHPLGCNIINVASDE--SG--TVYDLSI<br/> -----mkiarvesvpsmtliidakakamkaegidvcsfsagepdlnfPKHIVEAA<b>KAAL-EOG-K</b>TRIGAGGERREALAKLORDNGL--CYG-----ADNLTINNGKSTFNLMMLAMERDEIIPAFWVSYTP</p> <p><b>SARST:</b> aliSize=351 (resi) RMSD=12.84 (Å)<br/> mnyarfi taasaarnpspirtmt dilsrgpkmsislagglpnpmfptkavi <b>TVENGKTI-OFGEAMMKRA</b>LOVSPSAIPFLSWKLOIKLHNpPTIHyppsqgMDLCSOGLCKVEMINPNDNLIDFAVSGTLOSTHPLGCNIINVASDE--SG--TVYDLSI<br/> -----mkiarvesvpsmtliidakakamkaegidvcsfsagepdlnfPKHIVEAA<b>KAAL-EOG-K</b>TRIGAGGERREALAKLORDNGL--CYG-----ADNLTINNGKSTFNLMMLAMERDEIIPAFWVSYTP</p> <p><b>BLAST:</b> aliSize=176 (resi) iden=27.20% (102/375) simi=46.93% (176/375)<br/> mnyarfi taasaarnpspirtmt dilsrgpkmsislagglpnpmfptkavi <b>TVENGKTI-OFGEAMMKRA</b>LOVSPSAIPFLSWKLOIKLHNpPTIHyppsqgMDLCSOGLCKVEMINPNDNLIDFAVSGTLOSTHPLGCNIINVASDE--SG--TVYDLSI<br/> -----mkiarvesvpsmtliidakakamkaegidvcsfsagepdlnfPKHIVEAA<b>KAAL-EOG-K</b>TRIGAGGERREALAKLORDNGL--CYG-----ADNLTINNGKSTFNLMMLAMERDEIIPAFWVSYTP</p> <p><b>Proposed:</b> aliSize=345 (resi) RMSD=2.07 (Å)<br/> mnyarfi taasaarnpspirtmt dilsrgpkmsislagglpnpmfptkavi <b>TVENGKTI-OFGEAMMKRA</b>LOVSPSAIPFLSWKLOIKLHNpPTIHyppsqgMDLCSOGLCKVEMINPNDNLIDFAVSGTLOSTHPLGCNIINVASDE--SG--TVYDLSI<br/> -----mkiarvesvpsmtliidakakamkaegidvcsfsagepdlnfPKHIVEAA<b>KAAL-EOG-K</b>TRIGAGGERREALAKLORDNGL--CYG-----ADNLTINNGKSTFNLMMLAMERDEIIPAFWVSYTP</p> |
| 665 | <div data-bbox="172 1526 243 1598">2qlrA (425)</div> <div data-bbox="172 1845 243 1917">1qirA (396)</div> | N 12.63 | <p><b>TM-align:</b> aliSize=331 (resi) RMSD=3.09 (Å)<br/> mnyarfi taasaarnpspirtmt dilsrgpkmsislagglpnpmfptkavi <b>TVENGKTI-OFGEAMMKRA</b>LOVSPSAIPFLSWKLOIKLHNpPTIHyppsqgMDLCSOGLCKVEMINPNDNLIDFAVSGTLOSTHPLGCNIINVASDE--SG--TVYDLSI<br/> -----mkiarvesvpsmtliidakakamkaegidvcsfsagepdlnfPKHIVEAA<b>KAAL-EOG-K</b>TRIGAGGERREALAKLORDNGL--CYG-----ADNLTINNGKSTFNLMMLAMERDEIIPAFWVSYTP</p> <p><b>SARST:</b> aliSize=331 (resi) RMSD=12.50 (Å)<br/> mnyarfi taasaarnpspirtmt dilsrgpkmsislagglpnpmfptkavi <b>TVENGKTI-OFGEAMMKRA</b>LOVSPSAIPFLSWKLOIKLHNpPTIHyppsqgMDLCSOGLCKVEMINPNDNLIDFAVSGTLOSTHPLGCNIINVASDE--SG--TVYDLSI<br/> -----mkiarvesvpsmtliidakakamkaegidvcsfsagepdlnfPKHIVEAA<b>KAAL-EOG-K</b>TRIGAGGERREALAKLORDNGL--CYG-----ADNLTINNGKSTFNLMMLAMERDEIIPAFWVSYTP</p> <p><b>BLAST:</b> aliSize=31 (resi) iden=5.81% (23/396) simi=7.83% (31/396)<br/> mnyarfi taasaarnpspirtmt dilsrgpkmsislagglpnpmfptkavi <b>TVENGKTI-OFGEAMMKRA</b>LOVSPSAIPFLSWKLOIKLHNpPTIHyppsqgMDLCSOGLCKVEMINPNDNLIDFAVSGTLOSTHPLGCNIINVASDE--SG--TVYDLSI<br/> -----mkiarvesvpsmtliidakakamkaegidvcsfsagepdlnfPKHIVEAA<b>KAAL-EOG-K</b>TRIGAGGERREALAKLORDNGL--CYG-----ADNLTINNGKSTFNLMMLAMERDEIIPAFWVSYTP</p> <p><b>Proposed:</b> aliSize=355 (resi) RMSD=2.66 (Å)<br/> mnyarfi taasaarnpspirtmt dilsrgpkmsislagglpnpmfptkavi <b>TVENGKTI-OFGEAMMKRA</b>LOVSPSAIPFLSWKLOIKLHNpPTIHyppsqgMDLCSOGLCKVEMINPNDNLIDFAVSGTLOSTHPLGCNIINVASDE--SG--TVYDLSI<br/> -----mkiarvesvpsmtliidakakamkaegidvcsfsagepdlnfPKHIVEAA<b>KAAL-EOG-K</b>TRIGAGGERREALAKLORDNGL--CYG-----ADNLTINNGKSTFNLMMLAMERDEIIPAFWVSYTP</p>      |

|     |                                                                                              |   |       |                                                                                                                                                                                                                                                                                                                                                                                                                                                                                                                                                                                                                                                                                                                                                                                                                                                                                                                                                                                                                                                                                                                                                                                                                                                                                                                                                                                                                                                                                                                                                                                                                                                                                                                                                                                                                                                                                                                                                                                   |
|-----|----------------------------------------------------------------------------------------------|---|-------|-----------------------------------------------------------------------------------------------------------------------------------------------------------------------------------------------------------------------------------------------------------------------------------------------------------------------------------------------------------------------------------------------------------------------------------------------------------------------------------------------------------------------------------------------------------------------------------------------------------------------------------------------------------------------------------------------------------------------------------------------------------------------------------------------------------------------------------------------------------------------------------------------------------------------------------------------------------------------------------------------------------------------------------------------------------------------------------------------------------------------------------------------------------------------------------------------------------------------------------------------------------------------------------------------------------------------------------------------------------------------------------------------------------------------------------------------------------------------------------------------------------------------------------------------------------------------------------------------------------------------------------------------------------------------------------------------------------------------------------------------------------------------------------------------------------------------------------------------------------------------------------------------------------------------------------------------------------------------------------|
| 666 | <div style="text-align: center;"> <p>2qlrA<br/>(425)</p> <hr/> <p>1spaA<br/>(396)</p> </div> | N | 12.88 | <p><b>TM-align: aliSize=332 (resi) RMSD=3.23 (Å)</b><br/> mnyarfitaasaarncspirtmtidilsrgpksmsislagglnnmpfktavi-----ITVnGKTIQFGeeMKRALQSPSaGIPGIIISWIKOIQIKhNpPTiHyppsgqMDLVIISOOGLCKVFEMIIInpdnVITDEAAGTLOSLHP--LGCNIINVASIdessIpdSLrdLsRWpedaknpknTPKfITVTPNGNPTNSIstSRKKEIYELARKYDFLIEDEDFLFIOFKFRVPTIISMDVGRVIRADSIIS--SSGLIIFITGPKPIERVILHIQVstIhPST---FNQILMISOLHewGeeGFMAHVDRVIDFYSNQKDAIAADKWTGLAEHWHPVPAAGMFWTKgINDVTEKAVKMGVLMlPgnafyvdsapsylIASFSASASPEQMDVAFQVIAqlikes1</p> <p><b>SARST: aliSize=333 (resi) RMSD=12.19 (Å)</b><br/> mnyarfitaasaarncspirtmtidilsrgpksmsislagglnnmpfktavi-----ITVnGKTIQFGeeMKRALQSPSaGIPGIIISWIKOIQIKhNpPTiHyppsgqMDLVIISOOGLCKVFEMIIInpdnVITDEAAGTLOSLHP--LGCNIINVASIdessIpdSLrdLsRWpedaknpknTPKfITVTPNGNPTNSIstSRKKEIYELARKYDFLIEDEDFLFIOFKFRVPTIISMDVGRVIRADSIIS--SSGLIIFITGPKPIERVILHIQVstIhPST---FNQILMISOLHewGeeGFMAHVDRVIDFYSNQKDAIAADKWTGLAEHWHPVPAAGMFWTKgINDVTEKAVKMGVLMlPgnafyvdsapsylIASFSASASPEQMDVAFQVIAqlikes1</p> <p><b>BLAST: aliSize=311 (resi) iden=5.81% (23/396) simi=7.83% (31/396)</b><br/> mnyarfitaasaarncspirtmtidilsrgpksmsislagglnnmpfktavi-----ITVnGKTIQFGeeMKRALQSPSaGIPGIIISWIKOIQIKhNpPTiHyppsgqMDLVIISOOGLCKVFEMIIInpdnVITDEAAGTLOSLHP--LGCNIINVASIdessIpdSLrdLsRWpedaknpknTPKfITVTPNGNPTNSIstSRKKEIYELARKYDFLIEDEDFLFIOFKFRVPTIISMDVGRVIRADSIIS--SSGLIIFITGPKPIERVILHIQVstIhPST---FNQILMISOLHewGeeGFMAHVDRVIDFYSNQKDAIAADKWTGLAEHWHPVPAAGMFWTKgINDVTEKAVKMGVLMlPgnafyvdsapsylIASFSASASPEQMDVAFQVIAqlikes1</p> <p><b>Proposed: aliSize=352 (resi) RMSD=2.64 (Å)</b><br/> mnyarfitaasaarncspirtmtidilsrgpksmsislagglnnmpfktavi-----ITVnGKTIQFGeeMKRALQSPSaGIPGIIISWIKOIQIKhNpPTiHyppsgqMDLVIISOOGLCKVFEMIIInpdnVITDEAAGTLOSLHP--LGCNIINVASIdessIpdSLrdLsRWpedaknpknTPKfITVTPNGNPTNSIstSRKKEIYELARKYDFLIEDEDFLFIOFKFRVPTIISMDVGRVIRADSIIS--SSGLIIFITGPKPIERVILHIQVstIhPST---FNQILMISOLHewGeeGFMAHVDRVIDFYSNQKDAIAADKWTGLAEHWHPVPAAGMFWTKgINDVTEKAVKMGVLMlPgnafyvdsapsylIASFSASASPEQMDVAFQVIAqlikes1</p>  |
| 667 | <div style="text-align: center;"> <p>2qlrA<br/>(425)</p> <hr/> <p>1uu1C<br/>(335)</p> </div> | N | 11.64 | <p><b>TM-align: aliSize=296 (resi) RMSD=3.20 (Å)</b><br/> mnyarfitaasaarncspirtmtidilsrgpksmsislagglnnmpfktavi-----ITVnGKTIQFGeeMKRALQSPSaGIPGIIISWIKOIQIKhNpPTiHyppsgqMDLVIISOOGLCKVFEMIIInpdnVITDEAAGTLOSLHP--LGCNIINVASIdessIpdSLrdLsRWpedaknpknTPKfITVTPNGNPTNSIstSRKKEIYELARKYDFLIEDEDFLFIOFKFRVPTIISMDVGRVIRADSIIS--SSGLIIFITGPKPIERVILHIQVstIhPST---FNQILMISOLHewGeeGFMAHVDRVIDFYSNQKDAIAADKWTGLAEHWHPVPAAGMFWTKgINDVTEKAVKMGVLMlPgnafyvdsapsylIASFSASASPEQMDVAFQVIAqlikes1</p> <p><b>SARST: aliSize=311 (resi) RMSD=12.05 (Å)</b><br/> mnyarfitaasaarncspirtmtidilsrgpksmsislagglnnmpfktavi-----ITVnGKTIQFGeeMKRALQSPSaGIPGIIISWIKOIQIKhNpPTiHyppsgqMDLVIISOOGLCKVFEMIIInpdnVITDEAAGTLOSLHP--LGCNIINVASIdessIpdSLrdLsRWpedaknpknTPKfITVTPNGNPTNSIstSRKKEIYELARKYDFLIEDEDFLFIOFKFRVPTIISMDVGRVIRADSIIS--SSGLIIFITGPKPIERVILHIQVstIhPST---FNQILMISOLHewGeeGFMAHVDRVIDFYSNQKDAIAADKWTGLAEHWHPVPAAGMFWTKgINDVTEKAVKMGVLMlPgnafyvdsapsylIASFSASASPEQMDVAFQVIAqlikes1</p> <p><b>BLAST: aliSize=61 (resi) iden=10.15% (34/335) simi=18.21% (61/335)</b><br/> mnyarfitaasaarncspirtmtidilsrgpksmsislagglnnmpfktavi-----ITVnGKTIQFGeeMKRALQSPSaGIPGIIISWIKOIQIKhNpPTiHyppsgqMDLVIISOOGLCKVFEMIIInpdnVITDEAAGTLOSLHP--LGCNIINVASIdessIpdSLrdLsRWpedaknpknTPKfITVTPNGNPTNSIstSRKKEIYELARKYDFLIEDEDFLFIOFKFRVPTIISMDVGRVIRADSIIS--SSGLIIFITGPKPIERVILHIQVstIhPST---FNQILMISOLHewGeeGFMAHVDRVIDFYSNQKDAIAADKWTGLAEHWHPVPAAGMFWTKgINDVTEKAVKMGVLMlPgnafyvdsapsylIASFSASASPEQMDVAFQVIAqlikes1</p> <p><b>Proposed: aliSize=312 (resi) RMSD=2.72 (Å)</b><br/> mnyarfitaasaarncspirtmtidilsrgpksmsislagglnnmpfktavi-----ITVnGKTIQFGeeMKRALQSPSaGIPGIIISWIKOIQIKhNpPTiHyppsgqMDLVIISOOGLCKVFEMIIInpdnVITDEAAGTLOSLHP--LGCNIINVASIdessIpdSLrdLsRWpedaknpknTPKfITVTPNGNPTNSIstSRKKEIYELARKYDFLIEDEDFLFIOFKFRVPTIISMDVGRVIRADSIIS--SSGLIIFITGPKPIERVILHIQVstIhPST---FNQILMISOLHewGeeGFMAHVDRVIDFYSNQKDAIAADKWTGLAEHWHPVPAAGMFWTKgINDVTEKAVKMGVLMlPgnafyvdsapsylIASFSASASPEQMDVAFQVIAqlikes1</p> |
| 668 | <div style="text-align: center;"> <p>2qlrA<br/>(425)</p> <hr/> <p>1uu2A<br/>(321)</p> </div> | N | 12.77 | <p><b>TM-align: aliSize=294 (resi) RMSD=3.10 (Å)</b><br/> mnyarfitaasaarncspirtmtidilsrgpksmsislagglnnmpfktavi-----ITVnGKTIQFGeeMKRALQSPSaGIPGIIISWIKOIQIKhNpPTiHyppsgqMDLVIISOOGLCKVFEMIIInpdnVITDEAAGTLOSLHP--LGCNIINVASIdessIpdSLrdLsRWpedaknpknTPKfITVTPNGNPTNSIstSRKKEIYELARKYDFLIEDEDFLFIOFKFRVPTIISMDVGRVIRADSIIS--SSGLIIFITGPKPIERVILHIQVstIhPST---FNQILMISOLHewGeeGFMAHVDRVIDFYSNQKDAIAADKWTGLAEHWHPVPAAGMFWTKgINDVTEKAVKMGVLMlPgnafyvdsapsylIASFSASASPEQMDVAFQVIAqlikes1</p> <p><b>SARST: aliSize=307 (resi) RMSD=11.21 (Å)</b><br/> mnyarfitaasaarncspirtmtidilsrgpksmsislagglnnmpfktavi-----ITVnGKTIQFGeeMKRALQSPSaGIPGIIISWIKOIQIKhNpPTiHyppsgqMDLVIISOOGLCKVFEMIIInpdnVITDEAAGTLOSLHP--LGCNIINVASIdessIpdSLrdLsRWpedaknpknTPKfITVTPNGNPTNSIstSRKKEIYELARKYDFLIEDEDFLFIOFKFRVPTIISMDVGRVIRADSIIS--SSGLIIFITGPKPIERVILHIQVstIhPST---FNQILMISOLHewGeeGFMAHVDRVIDFYSNQKDAIAADKWTGLAEHWHPVPAAGMFWTKgINDVTEKAVKMGVLMlPgnafyvdsapsylIASFSASASPEQMDVAFQVIAqlikes1</p> <p><b>BLAST: aliSize=61 (resi) iden=10.59% (34/321) simi=19.00% (61/321)</b><br/> mnyarfitaasaarncspirtmtidilsrgpksmsislagglnnmpfktavi-----ITVnGKTIQFGeeMKRALQSPSaGIPGIIISWIKOIQIKhNpPTiHyppsgqMDLVIISOOGLCKVFEMIIInpdnVITDEAAGTLOSLHP--LGCNIINVASIdessIpdSLrdLsRWpedaknpknTPKfITVTPNGNPTNSIstSRKKEIYELARKYDFLIEDEDFLFIOFKFRVPTIISMDVGRVIRADSIIS--SSGLIIFITGPKPIERVILHIQVstIhPST---FNQILMISOLHewGeeGFMAHVDRVIDFYSNQKDAIAADKWTGLAEHWHPVPAAGMFWTKgINDVTEKAVKMGVLMlPgnafyvdsapsylIASFSASASPEQMDVAFQVIAqlikes1</p> <p><b>Proposed: aliSize=299 (resi) RMSD=2.58 (Å)</b><br/> mnyarfitaasaarncspirtmtidilsrgpksmsislagglnnmpfktavi-----ITVnGKTIQFGeeMKRALQSPSaGIPGIIISWIKOIQIKhNpPTiHyppsgqMDLVIISOOGLCKVFEMIIInpdnVITDEAAGTLOSLHP--LGCNIINVASIdessIpdSLrdLsRWpedaknpknTPKfITVTPNGNPTNSIstSRKKEIYELARKYDFLIEDEDFLFIOFKFRVPTIISMDVGRVIRADSIIS--SSGLIIFITGPKPIERVILHIQVstIhPST---FNQILMISOLHewGeeGFMAHVDRVIDFYSNQKDAIAADKWTGLAEHWHPVPAAGMFWTKgINDVTEKAVKMGVLMlPgnafyvdsapsylIASFSASASPEQMDVAFQVIAqlikes1</p> |





|     |                                |   |       |                                                                                                                                                                                                                                                                                                                                                                                                                                                                                                                                                                                                                                                                                                                                                                                                                                                                                                                                                                                                                                                                                                                                                                                                                                                                                                                                                                                                                                                                                                                                                                                                                                                                                                                                                                                                                                                                                                                                                                                                                                                                                                                                                                                                                                                                                                                                                                                                                                                                                                                                                                                                                                                                                                                                                                                                                                                                                                                                                                                                                                                                                                                                                                                                                                                                                                                                                                                                                                                                                                                                                                                                                                                                                                                                                                                                                                                                                                                                                                      |
|-----|--------------------------------|---|-------|----------------------------------------------------------------------------------------------------------------------------------------------------------------------------------------------------------------------------------------------------------------------------------------------------------------------------------------------------------------------------------------------------------------------------------------------------------------------------------------------------------------------------------------------------------------------------------------------------------------------------------------------------------------------------------------------------------------------------------------------------------------------------------------------------------------------------------------------------------------------------------------------------------------------------------------------------------------------------------------------------------------------------------------------------------------------------------------------------------------------------------------------------------------------------------------------------------------------------------------------------------------------------------------------------------------------------------------------------------------------------------------------------------------------------------------------------------------------------------------------------------------------------------------------------------------------------------------------------------------------------------------------------------------------------------------------------------------------------------------------------------------------------------------------------------------------------------------------------------------------------------------------------------------------------------------------------------------------------------------------------------------------------------------------------------------------------------------------------------------------------------------------------------------------------------------------------------------------------------------------------------------------------------------------------------------------------------------------------------------------------------------------------------------------------------------------------------------------------------------------------------------------------------------------------------------------------------------------------------------------------------------------------------------------------------------------------------------------------------------------------------------------------------------------------------------------------------------------------------------------------------------------------------------------------------------------------------------------------------------------------------------------------------------------------------------------------------------------------------------------------------------------------------------------------------------------------------------------------------------------------------------------------------------------------------------------------------------------------------------------------------------------------------------------------------------------------------------------------------------------------------------------------------------------------------------------------------------------------------------------------------------------------------------------------------------------------------------------------------------------------------------------------------------------------------------------------------------------------------------------------------------------------------------------------------------------------------------------|
| 672 | 2qlrA (425)<br><br>1yaaA (412) | N | 10.44 | <p><b>TM-align:</b> aliSize=335 (resi) RMSD=2.96 (Å)<br/>mnyarfi taasaarnpsirtmdilsrgpkmsislagl pnpnmfpk tavi -----TVPN-CK-TIOGEPMMKRAL SPSA I P I L SWL K O I K L h N P P T I H Y P p s q g M D L C V T S G S O O G C K V F F M I I - - N P G D N I I D F A Y S G T I O S T H P L G C N I I N V A S D --- F S G I V P S R D I L S R W K P E D A K N P K N T P K F I Y T V P N G N P N S I S R K K E Y F L A R K Y D F I L T E D P Y F I F O F N K F R V P T L S M D V - - D - G R I R A D S - - - F S I S S L I I F E L G P - - - - - K P L I F R V I L H O V S T L H S T F N O L M T S O L H E W G E F G M A H V D R I D F Y S N O K D A I I A A A D K W I T G L A E W H V P A A G M F L W K V K g i n d V K F I T F E K A V K M G L M I P g n a f y d s s a p s p y L A S F S S A S P E O M D V A F O V I A O I T K E S L</p> <p><b>SARST:</b> aliSize=334 (resi) RMSD=16.58 (Å)<br/>mnyarfi taasaarnpsirtmdilsrgpkmsislagl pnpnmfpk tavi tveNGKI IQGEEEMKRA -----LQ SPSA I P I L SWL K O I K L h n p p t I H Y P P - S O G M D L C V T S G S O O G C K V F F M I - - I N P G D N I I D F A Y S G T I O S T H P L G C N I I N V A S D --- E S G I V P S R D I L S R W K P E D A K N P K N T P K F I Y T V P N G N P N S I S R K K E Y F L A R K Y D F I L T E D P Y F I F O F N K F R V P T L S M D V - - D - G R V I R A D S - - - F S I S S L I I F E L G P - - - - - K P L I F R V I L H O V S T L H S T F N O L M T S O L H E W G E E G E M A H V D R I D F Y S N O K D A I I A A A D K W I T G L A E W H V P A A G M F L W K V K g i n d V K F I T F E K A V K M G L M I P g n a f y d s s a p s p y L A S F S S A S P E O M D V A F O V I A O I T K E S L</p> <p><b>BLAST:</b> aliSize=85 (resi) iden=13.35% (55/412) simi=20.63% (85/412)<br/>mnyarfi taasaarnpsirtmdilsrgpkmsislagl pnpnmfpk tavi tvengki iqigeemkral qyspsagi p e l l s w l k q l i k i h n p p t i h y p p s q g m d l c v t s g s q g l c k v f e m i n p g d n v l d e p a y s g t l q s l h p l g c n i i n v a s d e s g i v p d s l r d i l s r w k p e d a k n p k n t</p> <p>pkf lytvpng -----satlfnnielppdalfgikqrygdqratk v d l g i g a y r d d n g k p w l p s v k a a e k l i h n d s s y n h e y l g i t g l p s i t s n a a k i i f g t q s d a l q e d r v i s v q s l s g t g a l h i s a k f f s k f p d k l v y l s k p t w a n h m a i f e n g q l k t a t y p y w a n e t k s l d i n g f i n a i q k a p e g s i f v -----N N S L S R K K E Y F L A R K Y D F I L T E D P Y F I F O F N K F R P T I S M D V D G R V I R A D S - - - F S I S S L I I F E L G P - - - - - K P L I F R V I L H O V S T L H S T F N O L M T S O L H E W G E G F M A H V D R I D F Y S N O K D A I I A A D K W I T G L A E W H V P A A G M F L W K V K g i n d V K F I T F E K A V K M G L M I P g n a f y d s s a p s p y L A S F S S A S P E O M D V A F O V I A O I T K E S L</p> <p><b>Proposed:</b> aliSize=359 (resi) RMSD=2.59 (Å)<br/>mnyarfi taasaarnpsirtmdilsrgpkmsislagl pnpnmfpk tavi tveNGKI IQGEEEMKRA -----LQ SPSA I P I L SWL K O I K L h N P P T I H Y P p s q g M D L C V T S G S O O G C K V F F M I I - - N P G D N I I D F A Y S G T I O S T H P L G C N I I N V A S D --- F S G I V P S R D I L S R W K P E D A K N P K N T P K F I Y T V P N G N P N S I S R K K E Y F L A R K Y D F I L T E D P Y F I F O F N K F R V P T L S M D V - - D - G R I R A D S - - - F S I S S L I I F E L G P - - - - - K P L I F R V I L H O V S T L H S T F N O L M T S O L H E W G E F G M A H V D R I D F Y S N O K D A I I A A A D K W I T G L A E W H V P A A G M F L W K V K g i n d V K F I T F E K A V K M G L M I P g n a f y d s s a p s p y L A S F S S A S P E O M D V A F O V I A O I T K E S L</p>                                                                                                                                                                                                                                                                   |
| 673 | 2qlrA (425)<br><br>1yooA (396) | N | 12.63 | <p><b>TM-align:</b> aliSize=331 (resi) RMSD=3.09 (Å)<br/>mnyarfi taasaarnpsirtmdilsrgpkmsislagl pnpnmfpk tavi -----mfenit tapadp i g l a d l f r a d e r p g k i d i g m v y n d e t e k t p v l t s v k k a e o y l l e - n e t t - k n l g i d i e f e r g r c t o e l f c g - g s a l i n d k - - - R A K T A Q P F G T G A R V A A D F L A k n t s V - - R R W S N S W P N H K S V E N S A G L E V R E Y A Y Y a e n h T L D F - - - D A I N S N E A - - - - - Q A G D V L F H G C C H N P I D P L L O W Q L A Q S V E K G W P L F P A Q G F A R G L E E D a E G L R A F A A M H K E L I V S Y S Y K N F g L Y N E V A C L V a a d s e t V D R A F S O M K A A R N Y S S P A H G A S V V A T I S N D A I R A I W E Q E L T D M R Q R I O R M R O L F V N T L O E K G A N R D F S F T I K O N G M F F F - - - G L T S O V L R L R E E F G Y A V A S -----G L N V A G M I D N L A P L C E A I V A V I i ----</p> <p><b>SARST:</b> aliSize=330 (resi) RMSD=9.04 (Å)<br/>mnyarfi taasaarnpsirtmdilsrgpkmsislagl pnpnmfpk tavi tveNGKI IQGEEEMKRA -----LQ SPSA I P I L SWL K O I K L h n p p t I H Y P P - S O G M D L C V T S G S O O G C K V F F M I - - I N P G D N I I D F A Y S G T I O S T H P L G C N I I N V A S D --- F S G I V P S R D I L S R W K P E D A K N P K N T P K F I Y T V P N G N P N S I S R K K E Y F L A R K Y D F I L T E D P Y F I F O F N K F R V P T L S M D V - - D - G R V I R A D S - - - F S I S S L I I F E L G P - - - - - K P L I F R V I L H O V S T L H S T F N O L M T S O L H E W G E F G M A H V D R I D F Y S N O K D A I I A A A D K W I T G L A E W H V P A A G M F L W K V K g i n d V K F I T F E K A V K M G L M I P g n a f y d s s a p s p y L A S F S S A S P E O M D V A F O V I A O I T K E S L</p> <p><b>BLAST:</b> aliSize=42 (resi) iden=7.07% (28/396) simi=10.61% (42/396)<br/>mnyarfi taasaarnpsirtmdilsrgpkmsislagl pnpnmfpk tavi tvengki iqigeemkral qyspsagi p e l l s w l k q l i k i h n p p t i h y p p s q g m d l c v t s g s q g l c k v f e m i n p g d n v l d e p a y s g t l q s l h p l g c n i i n v a s d e s g i v p d s l r d i l s r w k p e d a k n p k n t</p> <p>pkf lytvpng -----mfenit tapadp i l g l a d l f r a d e r p g k i d i g m v y n d e t e k t p v l t s v k k a e o y l l e n e t t k n y G D G I F e g r C T E L L K G S A I N K R A T A O T P G T - - - G A R V A a d - - - K N T S V K R W S N S W P N H K S V N S a g l e v r e y a y d a e n h l d f a l i n s i n e a a g a d v l i f h g c c h n p t i d p t l e q w t l a q l s v e k g w p l f d f a y q f a r g l e e d a e g l r a f a a m h k e l i v a s s y s k n f g l y n e r v g a c t l v a a d s e t v d r a f s o m k a a i r v n y s s p a h g a s v v a t i i g n d a l r a i w e q e l t d m r q r i q r m r q l f v n t l q e k g a n r d f s f t i k q n g m f f g g l t k e q v i r l r e e f g -----q l m i s q l l h e w g e e g f m a h v d r i d f y s n g k d a i l a a a d k w l t g l a e w h v p a a g m f l w i k v k g i n d v k l i e e k a v k m g l m l p g n a f y d s s a p s p y l r a s f s s a s p e q m d v a f v l a q l i k e s l</p> <p><b>Proposed:</b> aliSize=355 (resi) RMSD=2.70 (Å)<br/>mnyarfi taasaarnpsirtmdilsrgpkmsislagl pnpnmfpk tavi tveNGKI IQGEEEMKRA -----LQ SPSA I P I L SWL K O I K L h N P P T I H Y P p s q g M D L C V T S G S O O G C K V F F M I I - - N P G D N I I D F A Y S G T I O S T H P L G C N I I N V A S D --- F S G I V P S R D I L S R W K P E D A K N P K N T P K F I Y T V P N G N P N S I S R K K E Y F L A R K Y D F I L T E D P Y F I F O F N K F R V P T L S M D V - - D - G R V I R A D S - - - F S I S S L I I F E L G P - - - - - K P L I F R V I L H O V S T L H S T F N O L M T S O L H E W G E F G M A H V D R I D F Y S N O K D A I I A A A D K W I T G L A E W H V P A A G M F L W K V K g i n d V K F I T F E K A V K M G L M I P g n a f y d s s a p s p y L A S F S S A S P E O M D V A F O V I A O I T K E S L</p> |
| 674 | 2qlrA (425)<br><br>2d5yA (396) | N | 12.63 | <p><b>TM-align:</b> aliSize=331 (resi) RMSD=3.08 (Å)<br/>mnyarfi taasaarnpsirtmdilsrgpkmsislagl pnpnmfpk tavi -----mfenit tapadp i g l a d l f r a d e r p g k i n l g i g y k d e t e k t p v l t s v k k a e o y l l e - n e t t - k n l g i d i e f e r g r c t o e l f c g - g s a l i n d k - - - R A K T A Q P F G T G A R V A A D F L A k n t s V - - R R W S N S W P N H K S V E N S A G L E V R E Y A Y Y a e n h T L D F - - - D A I N S N E A - - - - - Q A G D V L F H G C C H N P I D P L L O W Q L A Q S V E K G W P L F P A Q G F A R G L E E D a E G L R A F A A M H K E L I V S Y S Y K N F g L Y N E V A C L V a a d s e t V D R A F S O M K A A R N Y S S P A H G A S V V A T I S N D A I R A I W E Q E L T D M R Q R I O R M R O L F V N T L O E K G A N R D F S F T I K O N G M F F F - - - G L T S O V L R L R E E F G Y A V A S -----G L N V A G M I D N L A P L C E A I V A V I i ----</p> <p><b>SARST:</b> aliSize=337 (resi) RMSD=12.15 (Å)<br/>mnyarfi taasaarnpsirtmdilsrgpkmsislagl pnpnmfpk tavi tveNGKI IQGEEEMKRA -----LQ SPSA I P I L SWL K O I K L h n p p t I H Y P P - S O G M D L C V T S G S O O G C K V F F M I - - I N P G D N I I D F A Y S G T I O S T H P L G C N I I N V A S D --- F S G I V P S R D I L S R W K P E D A K N P K N T P K F I Y T V P N G N P N S I S R K K E Y F L A R K Y D F I L T E D P Y F I F O F N K F R V P T L S M D V - - D - G R V I R A D S - - - F S I S S L I I F E L G P - - - - - K P L I F R V I L H O V S T L H S T F N O L M T S O L H E W G E F G M A H V D R I D F Y S N O K D A I I A A A D K W I T G L A E W H V P A A G M F L W K V K g i n d V K F I T F E K A V K M G L M I P g n a f y d s s a p s p y L A S F S S A S P E O M D V A F O V I A O I T K E S L</p> <p><b>BLAST:</b> aliSize=42 (resi) iden=7.07% (28/396) simi=10.61% (42/396)<br/>mnyarfi taasaarnpsirtmdilsrgpkmsislagl pnpnmfpk tavi tvengki iqigeemkral qyspsagi p e l l s w l k q l i k i h n p p t i h y p p s q g m d l c v t s g s q g l c k v f e m i n p g d n v l d e p a y s g t l q s l h p l g c n i i n v a s d e s g i v p d s l r d i l s r w k p e d a k n p k n t</p> <p>pkf -----mfenit tapadp i l g l a d l f r a d e r p g k i n l g i g y k d e t e k t p v l t s v k k a e o y l l e n e t t k n y G D G I F e g r C T E L L K G S A I N K R A T A O T P G T - - - G A R V A a d - - - K N T S V K R W S N S W P N H K S V N S a g l e v r e y a y d a e n h l d f a l i n s i n e a a g a d v l i f h g c c h n p t i d p t l e q w t l a q l s v e k g w p l f d f a y q f a r g l e e d a e g l r a f a a m h k e l i v a s s y s k n f g l y n e r v g a c t l v a a d s e t v d r a f s o m k a a i r v n y s s p a h g a s v v a t i i s n d a l r a i w e q e l t d m r q r i q r m r q l f v n t l q e k g a n r d f s f t i k q n g m f f g g l t k e q v i r l r e e f g y v a -----q l m i s q l l h e w g e e g f m a h v d r i d f y s n g k d a i l a a a d k w l t g l a e w h v p a a g m f l w i k v k g i n d v k l i e e k a v k m g l m l p g n a f y d s s a p s p y l r a s f s s a s p e q m d v a f v l a q l i k e s l</p> <p><b>Proposed:</b> aliSize=355 (resi) RMSD=2.67 (Å)<br/>mnyarfi taasaarnpsirtmdilsrgpkmsislagl pnpnmfpk tavi tveNGKI IQGEEEMKRA -----LQ SPSA I P I L SWL K O I K L h N P P T I H Y P p s q g M D L C V T S G S O O G C K V F F M I I - - N P G D N I I D F A Y S G T I O S T H P L G C N I I N V A S D --- F S G I V P S R D I L S R W K P E D A K N P K N T P K F I Y T V P N G N P N S I S R K K E Y F L A R K Y D F I L T E D P Y F I F O F N K F R V P T L S M D V - - D - G R V I R A D S - - - F S I S S L I I F E L G P - - - - - K P L I F R V I L H O V S T L H S T F N O L M T S O L H E W G E F G M A H V D R I D F Y S N O K D A I I A A A D K W I T G L A E W H V P A A G M F L W K V K g i n d V K F I T F E K A V K M G L M I P g n a f y d s s a p s p y L A S F S S A S P E O M D V A F O V I A O I T K E S L</p>  |



|     |                |   |       |                                                                                                                                                                                                                                                                                                                                                                                                                                                                                                                                                                                                                                                                                                                                                                                                                                                                                                                                                                                                                                                                                                                                                                                                                                                                                                                                                                                                                                                                                                                                                                                                                                                                                                                                                                                                                                                                                                                                                                                                                                                                                                                                                                                                                                                                                                                                                                                                                                                                                                                                                                                                                                                                                                                                                                                                                                                                                                                                                                                                                                                                                                                                                                                                                                                                                                                                                                                                                                                                                                                                                                                                                                                                                                                                                                                                                                                                                                                                                                                                                                                                                                                                                                                                                                                                                                                                                                                                                                                                                                                                                                                                                                                                                                                                                                                                                                                                                                                                                                                                                                                                                                                                                                                                                                                                                                                                                                                                                                                                                                                                                                                                                                                                                                                                                                                                                                                                                                                                                                                                                                                                                                                                                                                                                                                                                                                                                                                                                                                                                                                                                                                                                                                                                                                                                                                                                                                                                                                                                                                                                                                                                                                                                                                                                                                                                                                                                                                                                                                                                                                                                                                                                                                                                                                                                                                                                                                                                                                                                                                                                                                                                                                                                                                                                                                                                                                                                                                                                                                                                                                                                                                                                                                                                                                                                                                                                                                                                                                                                                                                                                                                                                                                                                                                                                                                                                                                                                                                                                                                                                                                                                                                                                                                                                                                                                                                                                                                                                                                                                                                                                                                                                                                                                                                                                                                                                                                                                                                                                                                                                                                                                                                                                                                                                                                                                                                                                                                                                                                                                                                                                                                                                                                                                                                                                                                                                                                                                                                                                                                                                                                                                                                                                                                                                                                                                                                                                                                                                                                                                                                                                                                                                                                                                                                                                                                                                                                   |
|-----|----------------|---|-------|-----------------------------------------------------------------------------------------------------------------------------------------------------------------------------------------------------------------------------------------------------------------------------------------------------------------------------------------------------------------------------------------------------------------------------------------------------------------------------------------------------------------------------------------------------------------------------------------------------------------------------------------------------------------------------------------------------------------------------------------------------------------------------------------------------------------------------------------------------------------------------------------------------------------------------------------------------------------------------------------------------------------------------------------------------------------------------------------------------------------------------------------------------------------------------------------------------------------------------------------------------------------------------------------------------------------------------------------------------------------------------------------------------------------------------------------------------------------------------------------------------------------------------------------------------------------------------------------------------------------------------------------------------------------------------------------------------------------------------------------------------------------------------------------------------------------------------------------------------------------------------------------------------------------------------------------------------------------------------------------------------------------------------------------------------------------------------------------------------------------------------------------------------------------------------------------------------------------------------------------------------------------------------------------------------------------------------------------------------------------------------------------------------------------------------------------------------------------------------------------------------------------------------------------------------------------------------------------------------------------------------------------------------------------------------------------------------------------------------------------------------------------------------------------------------------------------------------------------------------------------------------------------------------------------------------------------------------------------------------------------------------------------------------------------------------------------------------------------------------------------------------------------------------------------------------------------------------------------------------------------------------------------------------------------------------------------------------------------------------------------------------------------------------------------------------------------------------------------------------------------------------------------------------------------------------------------------------------------------------------------------------------------------------------------------------------------------------------------------------------------------------------------------------------------------------------------------------------------------------------------------------------------------------------------------------------------------------------------------------------------------------------------------------------------------------------------------------------------------------------------------------------------------------------------------------------------------------------------------------------------------------------------------------------------------------------------------------------------------------------------------------------------------------------------------------------------------------------------------------------------------------------------------------------------------------------------------------------------------------------------------------------------------------------------------------------------------------------------------------------------------------------------------------------------------------------------------------------------------------------------------------------------------------------------------------------------------------------------------------------------------------------------------------------------------------------------------------------------------------------------------------------------------------------------------------------------------------------------------------------------------------------------------------------------------------------------------------------------------------------------------------------------------------------------------------------------------------------------------------------------------------------------------------------------------------------------------------------------------------------------------------------------------------------------------------------------------------------------------------------------------------------------------------------------------------------------------------------------------------------------------------------------------------------------------------------------------------------------------------------------------------------------------------------------------------------------------------------------------------------------------------------------------------------------------------------------------------------------------------------------------------------------------------------------------------------------------------------------------------------------------------------------------------------------------------------------------------------------------------------------------------------------------------------------------------------------------------------------------------------------------------------------------------------------------------------------------------------------------------------------------------------------------------------------------------------------------------------------------------------------------------------------------------------------------------------------------------------------------------------------------------------------------------------------------------------------------------------------------------------------------------------------------------------------------------------------------------------------------------------------------------------------------------------------------------------------------------------------------------------------------------------------------------------------------------------------------------------------------------------------------------------------------------------------------------------------------------------------------------------------------------------------------------------------------------------------------------------------------------------------------------------------------------------------------------------------------------------------------------------------------------------------------------------------------------------------------------------------------------------------------------------------------------------------------------------------------------------------------------------------------------------------------------------------------------------------------------------------------------------------------------------------------------------------------------------------------------------------------------------------------------------------------------------------------------------------------------------------------------------------------------------------------------------------------------------------------------------------------------------------------------------------------------------------------------------------------------------------------------------------------------------------------------------------------------------------------------------------------------------------------------------------------------------------------------------------------------------------------------------------------------------------------------------------------------------------------------------------------------------------------------------------------------------------------------------------------------------------------------------------------------------------------------------------------------------------------------------------------------------------------------------------------------------------------------------------------------------------------------------------------------------------------------------------------------------------------------------------------------------------------------------------------------------------------------------------------------------------------------------------------------------------------------------------------------------------------------------------------------------------------------------------------------------------------------------------------------------------------------------------------------------------------------------------------------------------------------------------------------------------------------------------------------------------------------------------------------------------------------------------------------------------------------------------------------------------------------------------------------------------------------------------------------------------------------------------------------------------------------------------------------------------------------------------------------------------------------------------------------------------------------------------------------------------------------------------------------------------------------------------------------------------------------------------------------------------------------------------------------------------------------------------------------------------------------------------------------------------------------------------------------------------------------------------------------------------------------------------------------------------------------------------------------------------------------------------------------------------------------------------------------------------------------------------------------------------------------------------------------------------------------------------------------------------------------------------------------------------------------------------------------------------------------------------------------------------------------------------------------------------------------------------------------------------------------------------------------------------------------------------------------------------------------------------------------------------------------------------------------------------------------------------------------------------------------------------------------------------------------------------------------------------------------------------------------------------------------------------------------------------------------------------------------------------------------------------------------------------------------------------------------------------------------------------------------------------------------|
| 678 | 2qlrA<br>(425) | N | 17.47 | <p><b>TM-align:</b> aliSize=333 (resi) RMSD=2.76 (Å)</p> <p>mnyarfitaasaarnspirmttdilsrgpksmsi <b>l</b>agglpnpnmfpfktavi <b>l</b>idlsigs <b>l</b>d <b>l</b>ppPEAPLKALAEALND <b>l</b>pt <b>l</b>tyg <b>l</b>ckl <b>l</b>sc <b>l</b>tl <b>l</b>pf <b>l</b>EEAARWYEGRYGV <b>l</b>g <b>l</b>d <b>l</b>rre <b>l</b>ALAL <b>l</b>ISGEH <b>l</b>AHL <b>l</b>LALTE <b>l</b>E <b>l</b>L <b>l</b>L <b>l</b>PL <b>l</b>PV <b>l</b>PSYFGAARVAS <b>l</b>RL <b>l</b>TEL <b>l</b>PL <b>l</b>R <b>l</b>D <b>l</b>GL <b>l</b>AD <b>l</b>L <b>l</b>K <b>l</b>AV <b>l</b>--P <b>l</b>EG <b>l</b>W <b>l</b>-R <b>l</b>-----E <b>l</b>A <b>l</b>V <b>l</b>LL <b>l</b>NP <b>l</b>- <b>l</b>NP <b>l</b>AV <b>l</b>AD <b>l</b>W <b>l</b>GY <b>l</b>FE <b>l</b>AL <b>l</b>G <b>l</b>A <b>l</b>R <b>l</b>H <b>l</b>G <b>l</b>L <b>l</b>W <b>l</b>L <b>l</b>H <b>l</b>N <b>l</b>P <b>l</b>V <b>l</b>D <b>l</b>Q <b>l</b>Y <b>l</b>EG <b>l</b>-E <b>l</b>A <b>l</b>S <b>l</b>P <b>l</b>A <b>l</b>L <b>l</b>P <b>l</b>G <b>l</b>A <b>l</b>K <b>l</b>E <b>l</b>N <b>l</b>V <b>l</b>L <b>l</b>A <b>l</b>F <b>l</b>L <b>l</b>E <b>l</b>A <b>l</b>L <b>l</b>E <b>l</b>R <b>l</b>V <b>l</b>K <b>l</b>G <b>l</b>I <b>l</b>D <b>l</b>F <b>l</b>N <b>l</b>O <b>l</b>Y <b>l</b>A <b>l</b>G <b>l</b>V <b>l</b>L <b>l</b>R <b>l</b>G <b>l</b>V <b>l</b>E <b>l</b>A <b>l</b>--K <b>l</b>-----T <b>l</b>P <b>l</b>K <b>l</b>E <b>l</b>V <b>l</b>R <b>l</b>G <b>l</b>Y <b>l</b>A <b>l</b>R <b>l</b>R <b>l</b>E <b>l</b>R <b>l</b>A <b>l</b>L <b>l</b>G <b>l</b>M <b>l</b>A <b>l</b>E <b>l</b>L <b>l</b>K <b>l</b>---G</p> <p><b>SARST:</b> aliSize=326 (resi) RMSD=5.38 (Å)</p> <p>mnyarfitaasaarnspirmttdilsrgpksmsi <b>l</b>agglpnpnmfpfktavi <b>l</b>v <b>l</b>----- <b>l</b>FN <b>l</b>GT <b>l</b>I <b>l</b>O <b>l</b>F <b>l</b>GF <b>l</b>EM <b>l</b>K <b>l</b>R <b>l</b>----- <b>l</b>AL <b>l</b>O <b>l</b>S <b>l</b>P <b>l</b>S <b>l</b>A <b>l</b>G <b>l</b>I <b>l</b>P <b>l</b>E <b>l</b> <b>l</b>SW <b>l</b>L <b>l</b>K <b>l</b>O <b>l</b>L <b>l</b>O <b>l</b>I <b>l</b>K <b>l</b>L <b>l</b>HN <b>l</b>P <b>l</b>pt <b>l</b>i <b>l</b>h <b>l</b>yp <b>l</b>sq <b>l</b>q <b>l</b>g <b>l</b>md <b>l</b>LC <b>l</b>VT <b>l</b>S <b>l</b>SO <b>l</b>O <b>l</b>G <b>l</b>CK <b>l</b>V <b>l</b>F <b>l</b>EM <b>l</b>I <b>l</b>N <b>l</b>G <b>l</b>N <b>l</b>V <b>l</b>D <b>l</b>EP <b>l</b> <b>l</b>SG <b>l</b>T <b>l</b>OS <b>l</b>L <b>l</b>H <b>l</b>PL <b>l</b>GC <b>l</b>NI <b>l</b>IN <b>l</b>V <b>l</b>AS <b>l</b>D <b>l</b>- <b>l</b>FS <b>l</b>G <b>l</b>IV <b>l</b>PD <b>l</b>SI <b>l</b>rd <b>l</b>II <b>l</b>SR <b>l</b>WK <b>l</b>Pe <b>l</b>D <b>l</b>AK <b>l</b>np <b>l</b>q <b>l</b>kn <b>l</b>TP <b>l</b>E <b>l</b>Y <b>l</b>TV <b>l</b>P <b>l</b>NG <b>l</b>N <b>l</b>NP <b>l</b>T <b>l</b>NS <b>l</b>LT <b>l</b>S <b>l</b>ER <b>l</b>KK <b>l</b>I <b>l</b>Y <b>l</b>E <b>l</b>AR <b>l</b>Y <b>l</b>D <b>l</b>FL <b>l</b>I <b>l</b>E <b>l</b>D <b>l</b>D <b>l</b>Y <b>l</b>F <b>l</b>LO <b>l</b>FK <b>l</b>FR <b>l</b>V <b>l</b>TF <b>l</b>S <b>l</b>M <b>l</b>D <b>l</b>V <b>l</b>D <b>l</b>- <b>l</b>GR <b>l</b>IR <b>l</b>AD <b>l</b>S <b>l</b>- <b>l</b>II <b>l</b>- <b>l</b>SS <b>l</b>RI <b>l</b>R <b>l</b>I <b>l</b>EL <b>l</b>T <b>l</b>PK <b>l</b>PL <b>l</b>E <b>l</b>V <b>l</b>IL <b>l</b>HI <b>l</b>O <b>l</b>ST <b>l</b>I <b>l</b>HP <b>l</b>ST <b>l</b>FN <b>l</b>OL <b>l</b>I <b>l</b>S <b>l</b>OL <b>l</b>He <b>l</b>w <b>l</b>ge <b>l</b>e <b>l</b>GF <b>l</b>MA <b>l</b>H <b>l</b>DR <b>l</b>VD <b>l</b>F <b>l</b>SN <b>l</b>OK <b>l</b>D <b>l</b>AI <b>l</b>A <b>l</b>A <b>l</b>D <b>l</b>kw <b>l</b>I <b>l</b>T <b>l</b>e <b>l</b>AF <b>l</b>WH <b>l</b>V <b>l</b>A <b>l</b>G <b>l</b>GF <b>l</b>I <b>l</b>K <b>l</b>VK <b>l</b>G <b>l</b>I <b>l</b>N <b>l</b>D <b>l</b>K <b>l</b>VE <b>l</b>L <b>l</b>E <b>l</b>E <b>l</b>A <b>l</b>K <b>l</b>M <b>l</b>G <b>l</b>V <b>l</b>L <b>l</b>M <b>l</b>L <b>l</b>P <b>l</b>NA <b>l</b>Y <b>l</b>V <b>l</b>D <b>l</b>SS <b>l</b>AP <b>l</b>SP <b>l</b>YL <b>l</b>AS <b>l</b>FS <b>l</b>S <b>l</b>ASP <b>l</b>OM <b>l</b>D <b>l</b>V <b>l</b>FO <b>l</b>V <b>l</b>A <b>l</b>OL <b>l</b>I <b>l</b>K <b>l</b>ES <b>l</b>1 <b>l</b>----- <b>l</b>V <b>l</b>L <b>l</b>S <b>l</b>LL <b>l</b>P <b>l</b>R <b>l</b>I <b>l</b>Y <b>l</b>L <b>l</b>GR <b>l</b>L <b>l</b>PE <b>l</b>GV <b>l</b>D <b>l</b>L <b>l</b>ER <b>l</b>VAL <b>l</b>A <b>l</b>GR <b>l</b>G <b>l</b>- <b>l</b>P <b>l</b>- <b>l</b>G <b>l</b>G <b>l</b>K <b>l</b>F <b>l</b>V <b>l</b>I <b>l</b>A <b>l</b>L <b>l</b>- <b>l</b>VR <b>l</b>PL <b>l</b>ELLE <b>l</b>AK <b>l</b>R <b>l</b>I <b>l</b>REAL <b>l</b>----</p> <p><b>BLAST:</b> aliSize=123 (resi) iden=20.97% (78/372) simi=33.06% (123/372)</p> <p>mnyarfitaasaarnspirmttdilsrgpksmsi <b>l</b>agglpnpnmfpfktav <b>l</b>lv <b>l</b>eng <b>l</b>kt <b>l</b>io <b>l</b>fg <b>l</b>cc <b>l</b>em <b>l</b>kr <b>l</b>al <b>l</b>q <b>l</b>ys <b>l</b>ps <b>l</b>ag <b>l</b>ipe <b>l</b>ll <b>l</b>sw <b>l</b>k <b>l</b>ql <b>l</b>q <b>l</b>ik <b>l</b>lh <b>l</b>np <b>l</b>pt <b>l</b>ih <b>l</b>yp <b>l</b>sq <b>l</b>q <b>l</b>md <b>l</b>lc <b>l</b>vt <b>l</b>s <b>l</b>----- <b>l</b>v <b>l</b>p <b>l</b>e <b>l</b>p <b>l</b>s <b>l</b>v <b>l</b> <b>l</b>vd <b>l</b>ea <b>l</b>rk <b>l</b>ra <b>l</b>er <b>l</b>g <b>l</b>v <b>l</b> <b>l</b>id <b>l</b>l <b>l</b>s <b>l</b>g <b>l</b>s <b>l</b> <b>l</b>d <b>l</b>l <b>l</b>pp <b>l</b>pe <b>l</b>ap <b>l</b>l <b>l</b>ka <b>l</b>la <b>l</b>e <b>l</b>al <b>l</b>nd <b>l</b>pt <b>l</b>ty <b>l</b>g <b>l</b>cl <b>l</b>sc <b>l</b>tl <b>l</b>pf <b>l</b>l <b>l</b>ee <b>l</b>aa <b>l</b>r <b>l</b>w <b>l</b>yg <b>l</b>----- <b>l</b>SO <b>l</b>O <b>l</b>G <b>l</b>CK <b>l</b>V <b>l</b>F <b>l</b>EM <b>l</b>I <b>l</b>N <b>l</b>G <b>l</b>N <b>l</b>V <b>l</b>D <b>l</b>EP <b>l</b> <b>l</b>SG <b>l</b>T <b>l</b>OS <b>l</b>L <b>l</b>H <b>l</b>PL <b>l</b>GC <b>l</b>NI <b>l</b>IN <b>l</b>V <b>l</b>AS <b>l</b>D <b>l</b>- <b>l</b>FS <b>l</b>G <b>l</b>IV <b>l</b>PD <b>l</b>SI <b>l</b>rd <b>l</b>II <b>l</b>SR <b>l</b>WK <b>l</b>Pe <b>l</b>D <b>l</b>AK <b>l</b>np <b>l</b>q <b>l</b>kn <b>l</b>TP <b>l</b>E <b>l</b>Y <b>l</b>TV <b>l</b>P <b>l</b>NG <b>l</b>N <b>l</b>NP <b>l</b>T <b>l</b>NS <b>l</b>LT <b>l</b>S <b>l</b>ER <b>l</b>KK <b>l</b>I <b>l</b>Y <b>l</b>E <b>l</b>AR <b>l</b>Y <b>l</b>D <b>l</b>FL <b>l</b>I <b>l</b>E <b>l</b>D <b>l</b>D <b>l</b>Y <b>l</b>F <b>l</b>LO <b>l</b>FK <b>l</b>FR <b>l</b>V <b>l</b>TF <b>l</b>S <b>l</b>M <b>l</b>- <b>l</b>D <b>l</b>V <b>l</b>D <b>l</b>- <b>l</b>GR <b>l</b>IR <b>l</b>AD <b>l</b>S <b>l</b>- <b>l</b>II <b>l</b>- <b>l</b>SS <b>l</b>RI <b>l</b>R <b>l</b>I <b>l</b>EL <b>l</b>T <b>l</b>PK <b>l</b>PL <b>l</b>E <b>l</b>V <b>l</b>IL <b>l</b>HI <b>l</b>O <b>l</b>ST <b>l</b>I <b>l</b>HP <b>l</b>ST <b>l</b>FN <b>l</b>OL <b>l</b>I <b>l</b>S <b>l</b>OL <b>l</b>He <b>l</b>w <b>l</b>ge <b>l</b>e <b>l</b>GF <b>l</b>MA <b>l</b>H <b>l</b>DR <b>l</b>VD <b>l</b>F <b>l</b>SN <b>l</b>OK <b>l</b>D <b>l</b>AI <b>l</b>A <b>l</b>A <b>l</b>D <b>l</b>kw <b>l</b>I <b>l</b>T <b>l</b>e <b>l</b>AF <b>l</b>WH <b>l</b>V <b>l</b>A <b>l</b>G <b>l</b>GF <b>l</b>I <b>l</b>K <b>l</b>VK <b>l</b>G <b>l</b>I <b>l</b>N <b>l</b>D <b>l</b>K <b>l</b>VE <b>l</b>L <b>l</b>E <b>l</b>E <b>l</b>A <b>l</b>K <b>l</b>M <b>l</b>G <b>l</b>V <b>l</b>L <b>l</b>M <b>l</b>L <b>l</b>P <b>l</b>NA <b>l</b>Y <b>l</b>V <b>l</b>D <b>l</b>SS <b>l</b>AP <b>l</b>SP <b>l</b>YL <b>l</b>AS <b>l</b>FS <b>l</b>S <b>l</b>ASP <b>l</b>OM <b>l</b>D <b>l</b>V <b>l</b>FO <b>l</b>V <b>l</b>A <b>l</b>OL <b>l</b>I <b>l</b>K <b>l</b>ES <b>l</b>1 <b>l</b>----- <b>l</b>V <b>l</b>L <b>l</b>S <b>l</b>LL <b>l</b>P <b>l</b>R <b>l</b>I <b>l</b>Y <b>l</b>L <b>l</b>GR <b>l</b>L <b>l</b>PE <b>l</b>GV <b>l</b>D <b>l</b>L <b>l</b>ER <b>l</b>VAL <b>l</b>A <b>l</b>GR <b>l</b>G <b>l</b>- <b>l</b>P <b>l</b>- <b>l</b>G <b>l</b>G <b>l</b>K <b>l</b>F <b>l</b>V <b>l</b>I <b>l</b>A <b>l</b>L <b>l</b>- <b>l</b>VR <b>l</b>PL <b>l</b>ELLE <b>l</b>AK <b>l</b>R <b>l</b>I <b>l</b>REAL <b>l</b>----- <b>l</b>PG <b>l</b>g <b>l</b>g <b>l</b>k <b>l</b>f <b>l</b>v <b>l</b>ri <b>l</b>al <b>l</b>vr <b>l</b>pl <b>l</b>e <b>l</b>ll <b>l</b>ea <b>l</b>kr <b>l</b>ire <b>l</b>al <b>l</b>----- <b>l</b>v <b>l</b>yd <b>l</b>s <b>l</b>ap <b>l</b>sp <b>l</b>yl <b>l</b>ra <b>l</b>s <b>l</b>f <b>l</b>ss <b>l</b>ap <b>l</b>q <b>l</b>md <b>l</b>v <b>l</b>aq <b>l</b>l <b>l</b>q <b>l</b>l <b>l</b>es <b>l</b>1</p> <p><b>Proposed:</b> aliSize=349 (resi) RMSD=2.13 (Å)</p> <p>mnyarfitaasaarnspirmttdilsrgpksmsi <b>l</b>agglpnpnmfpfktav <b>l</b>lv <b>l</b>eng <b>l</b>kt <b>l</b>io <b>l</b>fg <b>l</b>cc <b>l</b>em <b>l</b>kr <b>l</b>al <b>l</b>q <b>l</b>ys <b>l</b>ps <b>l</b>ag <b>l</b>ipe <b>l</b>ll <b>l</b>sw <b>l</b>k <b>l</b>ql <b>l</b>q <b>l</b>ik <b>l</b>lh <b>l</b>np <b>l</b>pt <b>l</b>ih <b>l</b>yp <b>l</b>sq <b>l</b>q <b>l</b>md <b>l</b>lc <b>l</b>vt <b>l</b>s <b>l</b>----- <b>l</b>v <b>l</b>p <b>l</b>e <b>l</b>p <b>l</b>s <b>l</b>v <b>l</b> <b>l</b>vd <b>l</b>ea <b>l</b>rk <b>l</b>ra <b>l</b>er <b>l</b>g <b>l</b>v <b>l</b> <b>l</b>id <b>l</b>l <b>l</b>s <b>l</b>g <b>l</b>s <b>l</b> <b>l</b>d <b>l</b>l <b>l</b>pp <b>l</b>pe <b>l</b>ap <b>l</b>l <b>l</b>ka <b>l</b>la <b>l</b>e <b>l</b>al <b>l</b>nd <b>l</b>pt <b>l</b>ty <b>l</b>g <b>l</b>cl <b>l</b>sc <b>l</b>tl <b>l</b>pf <b>l</b>l <b>l</b>ee <b>l</b>aa <b>l</b>r <b>l</b>w <b>l</b>yg <b>l</b>----- <b>l</b>SO <b>l</b>O <b>l</b>G <b>l</b>CK <b>l</b>V <b>l</b>F <b>l</b>EM <b>l</b>I <b>l</b>N <b>l</b>G <b>l</b>N <b>l</b>V <b>l</b>D <b>l</b>EP <b>l</b> <b>l</b>SG <b>l</b>T <b>l</b>OS <b>l</b>L <b>l</b>H <b>l</b>PL <b>l</b>GC <b>l</b>NI <b>l</b>IN <b>l</b>V <b>l</b>AS <b>l</b>D <b>l</b>- <b>l</b>FS <b>l</b>G <b>l</b>IV <b>l</b>PD <b>l</b>SI <b>l</b>rd <b>l</b>II <b>l</b>SR <b>l</b>WK <b>l</b>Pe <b>l</b>D <b>l</b>AK <b>l</b>np <b>l</b>q <b>l</b>kn <b>l</b>TP <b>l</b>E <b>l</b>Y <b>l</b>TV <b>l</b>P <b>l</b>NG <b>l</b>N <b>l</b>NP <b>l</b>T <b>l</b>NS <b>l</b>LT <b>l</b>S <b>l</b>ER <b>l</b>KK <b>l</b>I <b>l</b>Y <b>l</b>E <b>l</b>AR <b>l</b>Y <b>l</b>D <b>l</b>FL <b>l</b>I <b>l</b>E <b>l</b>D <b>l</b>D <b>l</b>Y <b>l</b>F <b>l</b>LO <b>l</b>FK <b>l</b>FR <b>l</b>V <b>l</b>TF <b>l</b>S <b>l</b>M <b>l</b>- <b>l</b>D <b>l</b>V <b>l</b>D <b>l</b>- <b>l</b>GR <b>l</b>IR <b>l</b>AD <b>l</b>S <b>l</b>- <b>l</b>II <b>l</b>- <b>l</b>SS <b>l</b>RI <b>l</b>R <b>l</b>I <b>l</b>EL <b>l</b>T <b>l</b>PK <b>l</b>PL <b>l</b>E <b>l</b>V <b>l</b>IL <b>l</b>HI <b>l</b>O <b>l</b>ST <b>l</b>I <b>l</b>HP <b>l</b>ST <b>l</b>FN <b>l</b>OL <b>l</b>I <b>l</b>S <b>l</b>OL <b>l</b>He <b>l</b>w <b>l</b>ge <b>l</b>e <b>l</b>GF <b>l</b>MA <b>l</b>H <b>l</b>DR <b>l</b>VD <b>l</b>F <b>l</b>SN <b>l</b>OK <b>l</b>D <b>l</b>AI <b>l</b>A <b>l</b>A <b>l</b>D <b>l</b>kw <b>l</b>I <b>l</b>T <b>l</b>e <b>l</b>AF <b>l</b>WH <b>l</b>V <b>l</b>A <b>l</b>G <b>l</b>GF <b>l</b>I <b>l</b>K <b>l</b>VK <b>l</b>G <b>l</b>I <b>l</b>N <b>l</b>D <b>l</b>K <b>l</b>VE <b>l</b>L <b>l</b>E <b>l</b>E <b>l</b>A <b>l</b>K <b>l</b>M <b>l</b>G <b>l</b>V <b>l</b>L <b>l</b>M <b>l</b>L <b>l</b>P <b>l</b>NA <b>l</b>Y <b>l</b>V <b>l</b>D <b>l</b>SS <b>l</b>AP <b>l</b>SP <b>l</b>YL <b>l</b>AS <b>l</b>FS <b>l</b>S <b>l</b>ASP <b>l</b>OM <b>l</b>D <b>l</b>V <b>l</b>FO <b>l</b>V <b>l</b>A <b>l</b>OL <b>l</b>I <b>l</b>K <b>l</b>ES <b>l</b>1 <b>l</b>----- <b>l</b>V <b>l</b>L <b>l</b>S <b>l</b>LL <b>l</b>P <b>l</b>R <b>l</b>I <b>l</b>Y <b>l</b>L <b>l</b>GR <b>l</b>L <b>l</b>PE <b>l</b>GV <b>l</b>D <b>l</b>L <b>l</b>ER <b>l</b>VAL <b>l</b>A <b>l</b>GR <b>l</b>G <b>l</b>- <b>l</b>P <b>l</b>- <b>l</b>G <b>l</b>G <b>l</b>K <b>l</b>F <b>l</b>V <b>l</b>I <b>l</b>A <b>l</b>L <b>l</b>- <b>l</b>VR <b>l</b>PL <b>l</b>ELLE <b>l</b>AK <b>l</b>R <b>l</b>I <b>l</b>REAL <b>l</b>----- <b>l</b>PG <b>l</b>g <b>l</b>g <b>l</b>k <b>l</b>f <b>l</b>v <b>l</b>ri <b>l</b>al <b>l</b>vr <b>l</b>pl <b>l</b>e <b>l</b>ll <b>l</b>ea <b>l</b>kr <b>l</b>ire <b>l</b>al <b>l</b>----- <b>l</b>v <b>l</b>yd <b>l</b>s <b>l</b>ap <b>l</b>sp <b>l</b>yl <b>l</b>ra <b>l</b>s <b>l</b>f <b>l</b>ss <b>l</b>ap <b>l</b>q <b>l</b>md <b>l</b>v <b>l</b>aq <b>l</b>l <b>l</b>q <b>l</b>l <b>l</b>es <b>l</b>1</p> |
|     | 2douA<br>(372) |   |       |                                                                                                                                                                                                                                                                                                                                                                                                                                                                                                                                                                                                                                                                                                                                                                                                                                                                                                                                                                                                                                                                                                                                                                                                                                                                                                                                                                                                                                                                                                                                                                                                                                                                                                                                                                                                                                                                                                                                                                                                                                                                                                                                                                                                                                                                                                                                                                                                                                                                                                                                                                                                                                                                                                                                                                                                                                                                                                                                                                                                                                                                                                                                                                                                                                                                                                                                                                                                                                                                                                                                                                                                                                                                                                                                                                                                                                                                                                                                                                                                                                                                                                                                                                                                                                                                                                                                                                                                                                                                                                                                                                                                                                                                                                                                                                                                                                                                                                                                                                                                                                                                                                                                                                                                                                                                                                                                                                                                                                                                                                                                                                                                                                                                                                                                                                                                                                                                                                                                                                                                                                                                                                                                                                                                                                                                                                                                                                                                                                                                                                                                                                                                                                                                                                                                                                                                                                                                                                                                                                                                                                                                                                                                                                                                                                                                                                                                                                                                                                                                                                                                                                                                                                                                                                                                                                                                                                                                                                                                                                                                                                                                                                                                                                                                                                                                                                                                                                                                                                                                                                                                                                                                                                                                                                                                                                                                                                                                                                                                                                                                                                                                                                                                                                                                                                                                                                                                                                                                                                                                                                                                                                                                                                                                                                                                                                                                                                                                                                                                                                                                                                                                                                                                                                                                                                                                                                                                                                                                                                                                                                                                                                                                                                                                                                                                                                                                                                                                                                                                                                                                                                                                                                                                                                                                                                                                                                                                                                                                                                                                                                                                                                                                                                                                                                                                                                                                                                                                                                                                                                                                                                                                                                                                                                                                                                                                                                                                   |

|     |                |   |       |                                                                                                                                                                                                                                                                                                                                                                                                                                                                                                                                                                                                                                                                                                                                                                                                                                                                                                                                                                                                                                                                                                                                                                                                                                                                                                                                                                                                                                                                                                                                                                                                                                                                                                                                                                                                                                                                                                                                                                                                                                                                                                                                                                                                                                                                                                                                                                                                                                                                                                                                                                                                                                                                                                                                                                                                                                                                                                                                                                                                                                                                                                                                                                                                                                                                                                                                                                                                                                                                                                                                                                                                                                                                                                                                                                                                                                                                                                                                                                                                                                                                                                                                                                                                                                                                                                                                                                                                                                                                                                                                                                                                                                                                                                                                                                                                                                                                                                                                                                                                                                                                                                                                                                                                                                                                                                                                                                                                                                                                                                                                                                        |
|-----|----------------|---|-------|------------------------------------------------------------------------------------------------------------------------------------------------------------------------------------------------------------------------------------------------------------------------------------------------------------------------------------------------------------------------------------------------------------------------------------------------------------------------------------------------------------------------------------------------------------------------------------------------------------------------------------------------------------------------------------------------------------------------------------------------------------------------------------------------------------------------------------------------------------------------------------------------------------------------------------------------------------------------------------------------------------------------------------------------------------------------------------------------------------------------------------------------------------------------------------------------------------------------------------------------------------------------------------------------------------------------------------------------------------------------------------------------------------------------------------------------------------------------------------------------------------------------------------------------------------------------------------------------------------------------------------------------------------------------------------------------------------------------------------------------------------------------------------------------------------------------------------------------------------------------------------------------------------------------------------------------------------------------------------------------------------------------------------------------------------------------------------------------------------------------------------------------------------------------------------------------------------------------------------------------------------------------------------------------------------------------------------------------------------------------------------------------------------------------------------------------------------------------------------------------------------------------------------------------------------------------------------------------------------------------------------------------------------------------------------------------------------------------------------------------------------------------------------------------------------------------------------------------------------------------------------------------------------------------------------------------------------------------------------------------------------------------------------------------------------------------------------------------------------------------------------------------------------------------------------------------------------------------------------------------------------------------------------------------------------------------------------------------------------------------------------------------------------------------------------------------------------------------------------------------------------------------------------------------------------------------------------------------------------------------------------------------------------------------------------------------------------------------------------------------------------------------------------------------------------------------------------------------------------------------------------------------------------------------------------------------------------------------------------------------------------------------------------------------------------------------------------------------------------------------------------------------------------------------------------------------------------------------------------------------------------------------------------------------------------------------------------------------------------------------------------------------------------------------------------------------------------------------------------------------------------------------------------------------------------------------------------------------------------------------------------------------------------------------------------------------------------------------------------------------------------------------------------------------------------------------------------------------------------------------------------------------------------------------------------------------------------------------------------------------------------------------------------------------------------------------------------------------------------------------------------------------------------------------------------------------------------------------------------------------------------------------------------------------------------------------------------------------------------------------------------------------------------------------------------------------------------------------------------------------------------------------------------------------------------------------|
| 679 | 2qlrA<br>(425) | N | 17.66 | <p><b>TM-align:</b> aliSize=333 (resi) RMSD=2.76 (Å)</p> <p>mnyarfitaasaarnspirmttdilsrgpksmsi <b>l</b>agglpnpnmfpfktavi <b>l</b>----- <b>l</b>sv <b>l</b>lv <b>l</b>vd <b>l</b>ea <b>l</b>rk <b>l</b>ra <b>l</b>er <b>l</b>g <b>l</b>v <b>l</b> <b>l</b>id <b>l</b>l <b>l</b>s <b>l</b>g <b>l</b>s <b>l</b> <b>l</b>d <b>l</b>l <b>l</b>pp <b>l</b>pe <b>l</b>ap <b>l</b>l <b>l</b>ka <b>l</b>la <b>l</b>e <b>l</b>al <b>l</b>nd <b>l</b>pt <b>l</b>ty <b>l</b>g <b>l</b>cl <b>l</b>sc <b>l</b>tl <b>l</b>pf <b>l</b>l <b>l</b>ee <b>l</b>aa <b>l</b>r <b>l</b>w <b>l</b>yg <b>l</b>----- <b>l</b>SO <b>l</b>O <b>l</b>G <b>l</b>CK <b>l</b>V <b>l</b>F <b>l</b>EM <b>l</b>I <b>l</b>N <b>l</b>G <b>l</b>N <b>l</b>V <b>l</b>D <b>l</b>EP <b>l</b> <b>l</b>SG <b>l</b>T <b>l</b>OS <b>l</b>L <b>l</b>H <b>l</b>PL <b>l</b>GC <b>l</b>NI <b>l</b>IN <b>l</b>V <b>l</b>AS <b>l</b>D <b>l</b>- <b>l</b>FS <b>l</b>G <b>l</b>IV <b>l</b>PD <b>l</b>SI <b>l</b>rd <b>l</b>II <b>l</b>SR <b>l</b>WK <b>l</b>Pe <b>l</b>D <b>l</b>AK <b>l</b>np <b>l</b>q <b>l</b>kn <b>l</b>TP <b>l</b>E <b>l</b>Y <b>l</b>TV <b>l</b>P <b>l</b>NG <b>l</b>N <b>l</b>NP <b>l</b>T <b>l</b>NS <b>l</b>LT <b>l</b>S <b>l</b>ER <b>l</b>KK <b>l</b>I <b>l</b>Y <b>l</b>E <b>l</b>AR <b>l</b>Y <b>l</b>D <b>l</b>FL <b>l</b>I <b>l</b>E <b>l</b>D <b>l</b>D <b>l</b>Y <b>l</b>F <b>l</b>LO <b>l</b>FK <b>l</b>FR <b>l</b>V <b>l</b>TF <b>l</b>S <b>l</b>M <b>l</b>- <b>l</b>D <b>l</b>V <b>l</b>D <b>l</b>- <b>l</b>GR <b>l</b>IR <b>l</b>AD <b>l</b>S <b>l</b>- <b>l</b>II <b>l</b>- <b>l</b>SS <b>l</b>RI <b>l</b>R <b>l</b>I <b>l</b>EL <b>l</b>T <b>l</b>PK <b>l</b>PL <b>l</b>E <b>l</b>V <b>l</b>IL <b>l</b>HI <b>l</b>O <b>l</b>ST <b>l</b>I <b>l</b>HP <b>l</b>ST <b>l</b>FN <b>l</b>OL <b>l</b>I <b>l</b>S <b>l</b>OL <b>l</b>He <b>l</b>w <b>l</b>ge <b>l</b>e <b>l</b>GF <b>l</b>MA <b>l</b>H <b>l</b>DR <b>l</b>VD <b>l</b>F <b>l</b>SN <b>l</b>OK <b>l</b>D <b>l</b>AI <b>l</b>A <b>l</b>A <b>l</b>D <b>l</b>kw <b>l</b>I <b>l</b>T <b>l</b>e <b>l</b>AF <b>l</b>WH <b>l</b>V <b>l</b>A <b>l</b>G <b>l</b>GF <b>l</b>I <b>l</b>K <b>l</b>VK <b>l</b>G <b>l</b>I <b>l</b>N <b>l</b>D <b>l</b>K <b>l</b>VE <b>l</b>L <b>l</b>E <b>l</b>E <b>l</b>A <b>l</b>K <b>l</b>M <b>l</b>G <b>l</b>V <b>l</b>L <b>l</b>M <b>l</b>L <b>l</b>P <b>l</b>NA <b>l</b>Y <b>l</b>V <b>l</b>D <b>l</b>SS <b>l</b>AP <b>l</b>SP <b>l</b>YL <b>l</b>AS <b>l</b>FS <b>l</b>S <b>l</b>ASP <b>l</b>OM <b>l</b>D <b>l</b>V <b>l</b>FO <b>l</b>V <b>l</b>A <b>l</b>OL <b>l</b>I <b>l</b>K <b>l</b>ES <b>l</b>1 <b>l</b>----- <b>l</b>V <b>l</b>L <b>l</b>S <b>l</b>LL <b>l</b>P <b>l</b>R <b>l</b>I <b>l</b>Y <b>l</b>L <b>l</b>GR <b>l</b>L <b>l</b>PE <b>l</b>GV <b>l</b>D <b>l</b>L <b>l</b>ER <b>l</b>VAL <b>l</b>A <b>l</b>GR <b>l</b>G <b>l</b>- <b>l</b>P <b>l</b>- <b>l</b>G <b>l</b>G <b>l</b>K <b>l</b>F <b>l</b>V <b>l</b>I <b>l</b>A <b>l</b>L <b>l</b>- <b>l</b>VR <b>l</b>PL <b>l</b>ELLE <b>l</b>AK <b>l</b>R <b>l</b>I <b>l</b>REAL <b>l</b>----</p> <p><b>SARST:</b> aliSize=311 (resi) RMSD=4.04 (Å)</p> <p>mnyarfitaasaarnspirmttdilsrgpksmsi <b>l</b>agglpnpnmfpfktavi <b>l</b>eng <b>l</b>kt <b>l</b>io <b>l</b>fg <b>l</b>cc <b>l</b>em <b>l</b>kr <b>l</b>----- <b>l</b>AL <b>l</b>O <b>l</b>S <b>l</b>P <b>l</b>S <b>l</b>A <b>l</b>G <b>l</b>I <b>l</b>P <b>l</b>E <b>l</b> <b>l</b>SW <b>l</b>L <b>l</b>K <b>l</b>O <b>l</b>L <b>l</b>O <b>l</b>I <b>l</b>K <b>l</b>L <b>l</b>HN <b>l</b>P <b>l</b>pt <b>l</b>i <b>l</b>h <b>l</b>yp <b>l</b>sq <b>l</b>q <b>l</b>g <b>l</b>md <b>l</b>LC <b>l</b>VT <b>l</b>S <b>l</b>SO <b>l</b>O <b>l</b>G <b>l</b>CK <b>l</b>V <b>l</b>F <b>l</b>EM <b>l</b>I <b>l</b>N <b>l</b>G <b>l</b>N <b>l</b>V <b>l</b>D <b>l</b>EP <b>l</b> <b>l</b>SG <b>l</b>T <b>l</b>OS <b>l</b>L <b>l</b>H <b>l</b>PL <b>l</b>GC <b>l</b>NI <b>l</b>IN <b>l</b>V <b>l</b>AS <b>l</b>D <b>l</b>- <b>l</b>FS <b>l</b>G <b>l</b>IV <b>l</b>PD <b>l</b>SI <b>l</b>rd <b>l</b>II <b>l</b>SR <b>l</b>WK <b>l</b>Pe <b>l</b>D <b>l</b>AK <b>l</b>np <b>l</b>q <b>l</b>kn <b>l</b>TP <b>l</b>E <b>l</b>Y <b>l</b>TV <b>l</b>P <b>l</b>NG <b>l</b>N <b>l</b>NP <b>l</b>T <b>l</b>NS <b>l</b>LT <b>l</b>S <b>l</b>ER <b>l</b>KK <b>l</b>I <b>l</b>Y <b>l</b>E <b>l</b>AR <b>l</b>Y <b>l</b>D <b>l</b>FL <b>l</b>I <b>l</b>E <b>l</b>D <b>l</b>D <b>l</b>Y <b>l</b>F <b>l</b>LO <b>l</b>FK <b>l</b>FR <b>l</b>V <b>l</b>TF <b>l</b>S <b>l</b>M <b>l</b>- <b>l</b>D <b>l</b>V <b>l</b>D <b>l</b>- <b>l</b>GR <b>l</b>IR <b>l</b>AD <b>l</b>S <b>l</b>- <b>l</b>II <b>l</b>- <b>l</b>SS <b>l</b>RI <b>l</b>R <b>l</b>I <b>l</b>EL <b>l</b>T <b>l</b>PK <b>l</b>PL <b>l</b>E <b>l</b>V <b>l</b>IL <b>l</b>HI <b>l</b>O <b>l</b>ST <b>l</b>I <b>l</b>HP <b>l</b>ST <b>l</b>FN <b>l</b>OL <b>l</b>I <b>l</b>S <b>l</b>OL <b>l</b>He <b>l</b>w <b>l</b>ge <b>l</b>e <b>l</b>GF <b>l</b>MA <b>l</b>H <b>l</b>DR <b>l</b>VD <b>l</b>F <b>l</b>SN <b>l</b>OK <b>l</b>D <b>l</b>AI <b>l</b>A <b>l</b>A <b>l</b>D <b>l</b>kw <b>l</b>I <b>l</b>T <b>l</b>e <b>l</b>AF <b>l</b>WH <b>l</b>V <b>l</b>A <b>l</b>G <b>l</b>GF <b>l</b>I <b>l</b>K <b>l</b>VK <b>l</b>G <b>l</b>I <b>l</b>N <b>l</b>D <b>l</b>K <b>l</b>VE <b>l</b>L <b>l</b>E <b>l</b>E <b>l</b>A <b>l</b>K <b>l</b>M <b>l</b>G <b>l</b>V <b>l</b>L <b>l</b>M <b>l</b>L <b>l</b>P <b>l</b>NA <b>l</b>Y <b>l</b>V <b>l</b>D <b>l</b>SS <b>l</b>AP <b>l</b>SP <b>l</b>YL <b>l</b>AS <b>l</b>FS <b>l</b>S <b>l</b>ASP <b>l</b>OM <b>l</b>D <b>l</b>V <b>l</b>FO <b>l</b>V <b>l</b>A <b>l</b>OL <b>l</b>I <b>l</b>K <b>l</b></p> |
|-----|----------------|---|-------|------------------------------------------------------------------------------------------------------------------------------------------------------------------------------------------------------------------------------------------------------------------------------------------------------------------------------------------------------------------------------------------------------------------------------------------------------------------------------------------------------------------------------------------------------------------------------------------------------------------------------------------------------------------------------------------------------------------------------------------------------------------------------------------------------------------------------------------------------------------------------------------------------------------------------------------------------------------------------------------------------------------------------------------------------------------------------------------------------------------------------------------------------------------------------------------------------------------------------------------------------------------------------------------------------------------------------------------------------------------------------------------------------------------------------------------------------------------------------------------------------------------------------------------------------------------------------------------------------------------------------------------------------------------------------------------------------------------------------------------------------------------------------------------------------------------------------------------------------------------------------------------------------------------------------------------------------------------------------------------------------------------------------------------------------------------------------------------------------------------------------------------------------------------------------------------------------------------------------------------------------------------------------------------------------------------------------------------------------------------------------------------------------------------------------------------------------------------------------------------------------------------------------------------------------------------------------------------------------------------------------------------------------------------------------------------------------------------------------------------------------------------------------------------------------------------------------------------------------------------------------------------------------------------------------------------------------------------------------------------------------------------------------------------------------------------------------------------------------------------------------------------------------------------------------------------------------------------------------------------------------------------------------------------------------------------------------------------------------------------------------------------------------------------------------------------------------------------------------------------------------------------------------------------------------------------------------------------------------------------------------------------------------------------------------------------------------------------------------------------------------------------------------------------------------------------------------------------------------------------------------------------------------------------------------------------------------------------------------------------------------------------------------------------------------------------------------------------------------------------------------------------------------------------------------------------------------------------------------------------------------------------------------------------------------------------------------------------------------------------------------------------------------------------------------------------------------------------------------------------------------------------------------------------------------------------------------------------------------------------------------------------------------------------------------------------------------------------------------------------------------------------------------------------------------------------------------------------------------------------------------------------------------------------------------------------------------------------------------------------------------------------------------------------------------------------------------------------------------------------------------------------------------------------------------------------------------------------------------------------------------------------------------------------------------------------------------------------------------------------------------------------------------------------------------------------------------------------------------------------------------------------------------------------------------------------------|

|     |                                       |   |       |                                                                                                                                                                                                                                                                                                                                                                                                                                                                                                                                                                                                                                                                                                                                                                                                                                                                                                                                                                                                                                                                                                                                                                                                                                                                                                                                                                                                                                                                                                                                                                                                                                                                                                                                                                                                                                                                                                                                                                                                                                                                                                                                                                                                                                                                                                                                                                                                                                                                                                                                                                                                                                                                                                                                                                                                                                                                                                                                                                                                                                                                                                                                                                                                                                                                                                                                                                                                                      |
|-----|---------------------------------------|---|-------|----------------------------------------------------------------------------------------------------------------------------------------------------------------------------------------------------------------------------------------------------------------------------------------------------------------------------------------------------------------------------------------------------------------------------------------------------------------------------------------------------------------------------------------------------------------------------------------------------------------------------------------------------------------------------------------------------------------------------------------------------------------------------------------------------------------------------------------------------------------------------------------------------------------------------------------------------------------------------------------------------------------------------------------------------------------------------------------------------------------------------------------------------------------------------------------------------------------------------------------------------------------------------------------------------------------------------------------------------------------------------------------------------------------------------------------------------------------------------------------------------------------------------------------------------------------------------------------------------------------------------------------------------------------------------------------------------------------------------------------------------------------------------------------------------------------------------------------------------------------------------------------------------------------------------------------------------------------------------------------------------------------------------------------------------------------------------------------------------------------------------------------------------------------------------------------------------------------------------------------------------------------------------------------------------------------------------------------------------------------------------------------------------------------------------------------------------------------------------------------------------------------------------------------------------------------------------------------------------------------------------------------------------------------------------------------------------------------------------------------------------------------------------------------------------------------------------------------------------------------------------------------------------------------------------------------------------------------------------------------------------------------------------------------------------------------------------------------------------------------------------------------------------------------------------------------------------------------------------------------------------------------------------------------------------------------------------------------------------------------------------------------------------------------------|
| 681 | <p>2qlrA (425)</p> <p>2egyB (394)</p> | N | 26.65 | <p><b>TM-align: aliSize=341 (resi) RMSD=2.05 (Å)</b><br/> mnyarfitaasaarnpspirmttdilsrgpkmsmlagglpnpnmfipktav-----LTVEn-GKTIOEGEEMKRALQVNSAIPESLWIKOLOIkhPptIhyppsqqMDI CVTSSOOG CKFFMIINP DNIDEAS<br/> -----kplswseafgkgagriqastirelkl1qrpg1lsfagglpapelIpkEEA-aEAAARILREKGEVLOYSTTEYAPRAFVAEWIG----V-R-----PEEVLITISQOAJDLGKVFLEDESPVLEASMAIAAFRLQPRFLTYPAGEPDLIAEEVK</p> <p>SITLISLHPLCNITINASDSSIVPISRDIISWkpedaknpqkntPKITIVNGNPTNSLTSERKFTIYFIARKYDFIITIDPPIYFQNKFRVTFISMD--VDGRRADSES-LISGRIEGLTGPKPLIFRVLHIIVSTIPSTFNLMISQHeWgeeeMAHVDRIIDFSNO<br/> MAIAAFRLQPRFLTYPAGEPDLIAEEVK-----RRELIISFQNPGLTPLPARRLLQMMERGLVYVVEDAAREIYGEARLSLFELAREAGYPGVYLGFSKVLSPRVAVAHPEALOKLVOAKGADITPMLNOMLVEHK-E---SERLERVRRVREK</p> <p>KNITIAAKWITGLAFWHVAAGMIIKVKGINDKVEIcFKVKMGLMIFNAIYVDSAPSYPYAFSSASPFQMDVAFQVIAOLIIES-L<br/> AQMHLIREVPKEVRYTRKGMVVMELPKGLSAEGIFRRLEENAFVGGPFANGGGENTRLSYATLDRGIAEGVRRGRALGLIA</p> <p><b>SARST: aliSize=375 (resi) RMSD=13.60 (Å)</b><br/> m--NYARFITAAASAARNPSPIRMTDLSRGPKSMISIAAGLNNMPEKTAviIvenektiofEEMKRA-----LOVPSAIPESLWIKOLqiklhnpptIHYPSOgqmdI CVTSSOOG CKFFMIINP DNIDEASITLISLHPLCNITINASDSSIVPISRDIISWk<br/> -kpISWSEAFGKGAGRI--QASTIRELKLTO--GILSFAGGLAELPK-----EAAEAAARILrekevaLOYSTTEYAPRAFVAEWIG----V-R-----PEEVLITISQOAJDLGKVFLEDESPVLEASMAIAAFRLQPRFLTYPAGEPDLIAEEVK</p> <p>WkpedaknpqkntPKITIVNGNPTNSLTSERKFTIYFIARKYDFIITIDPPIYFQNKFRVTFISMD--VDGRRADSES-LISGRIEGLTGPKPLIFRVLHIIVSTIPSTFNLMISQHeWgeeeMAHVDRIIDFSNO<br/> ER-----RRELIISFQNPGLTPLPARRLLQMMERGLVYVVEDAAREIYGEARLSLFELAREAGYPGVYLGFSKVLSPRVAVAHPEALOKLVOAKGADITPMLNOMLVEHK-E---SERLERVRRVREK</p> <p>DVKITIEFKVKMGLMIFNAIYVDSAPSYPYAFSSASPFQMDVAFQVIAOLIIES-L<br/> LSAAGLFRRLLEENAFVGGPFANGGGENTRLSYATLDRGIAEGVRRGRALGLIA</p> <p><b>BLAST: aliSize=203 (resi) iden=29.19% (115/394) simi=51.52% (203/394)</b><br/> mnyarfitaasaarnp-----PFTIMTDLISRGPKSMISIAAGLNNMPEKTAviIvenektiofEEMKRAALQVNSAIPESLWIKOLOIkhnpptIHYPSOgqmdI CVTSSOOG CKFFMIINP DNIDEASITLISLHPLCNITINASDSSIVPISR<br/> -----kplswseafgkgagriqastirelkl1qrpg1lsfagglpapelIpkEEA-aEAAARIL-REKGEVLOYSTTEYAPRAFVAEWIG----V-R-----PEEVLITISQOAJDLGKVFLEDESPVLEASMAIAAFRLQPRFLTYPAGEPDLIAEEVK</p> <p>DITISWkpedaknpqkntPKITIVNGNPTNSLTSERKFTIYFIARKYDFIITIDPPIYFQNKFRVTFISMD--VDGRRADSES-LISGRIEGLTGPKPLIFRVLHIIVSTIPSTFNLMISQHeWgeeeMAHVDRIIDFSNO<br/> EVKKE-----RRELIISFQNPGLTPLPARRLLQMMERGLVYVVEDAAREIYGEARLSLFELAREAGYPGVYLGFSKVLSPRVAVAHPEALOKLVOAKGADITPMLNOMLVEHK-E---SERLERVRRVREK</p> <p>V--ITNDVKITIEFKVKMGLMIFNAIYVDSAPSYPYAFSSASPFQMDVAFQVIAOLIIES-L<br/> LpKLS--AGLFRRLLEENAFVGGPFANGGGENTRLSYATLDRGIAEGVRRGRALGLIA</p> <p><b>Proposed: aliSize=379 (resi) RMSD=1.78 (Å)</b><br/> --MNYARFITAAASAARNPSPIRMTDLSRGPKSMISIAAGLNNMPEKTAviIvenektiofEEMKRAALQVNSAIPESLWIKOLOIkhnpptIHYPSOgqmdI CVTSSOOG CKFFMIINP DNIDEASITLISLHPLCNITINASDSSIVPISRDIISWk<br/> kpLSWSEAFGKGAGRIQAST--RELKLTO--GILSFAGGLAELPK-----EAAARIL-REKGEVLOYSTTEYAPRAFVAEWIG----V-R-----RpeEVLITISQOAJDLGKVFLEDESPVLEASMAIAAFRLQPRFLTYPAGEPDLIAEEVK</p> <p>pedaknpqkntPKITIVNGNPTNSLTSERKFTIYFIARKYDFIITIDPPIYFQNKFRVTFISMD--VDGRRADSES-LISGRIEGLTGPKPLIFRVLHIIVSTIPSTFNLMISQHeWgeeeMAHVDRIIDFSNO<br/> ER-----RRELIISFQNPGLTPLPARRLLQMMERGLVYVVEDAAREIYGEARLSLFELAREAGYPGVYLGFSKVLSPRVAVAHPEALOKLVOAKGADITPMLNOMLVEHK-E---SERLERVRRVREK</p> <p>KeIcFKVKMGLMIFNAIYVDSAPSYPYAFSSASPFQMDVAFQVIAOLIIES-L<br/> EGIFRRLEENAFVGGPFANGGGENTRLSYATLDRGIAEGVRRGRALGLIA</p> |
| 682 | <p>2qlrA (425)</p> <p>2egyC (396)</p> | N | 27.27 | <p><b>TM-align: aliSize=341 (resi) RMSD=2.09 (Å)</b><br/> mnyarfitaasaarnpspirmttdilsrgpkmsmlagglpnpnmfipktav-----LTVEn-GKTIOEGEEMKRALQVNSAIPESLWIKOLOIkhPptIhyppsqqMDI CVTSSOOG CKFFMIINP DNIDEAS<br/> -----kplswseafgkgagriqastirelkl1qrpg1lsfagglpapelIpkEEA-aEAAARILREKGEVLOYSTTEYAPRAFVAEWIG----V-R-----PEEVLITISQOAJDLGKVFLEDESPVLEASMAIAAFRLQPRFLTYPAGEPDLIAEEVK</p> <p>SITLISLHPLCNITINASDSSIVPISRDIISWkpedaknpqkntPKITIVNGNPTNSLTSERKFTIYFIARKYDFIITIDPPIYFQNKFRVTFISMD--VDGRRADSES-LISGRIEGLTGPKPLIFRVLHIIVSTIPSTFNLMISQHeWgeeeMAHVDRIIDFSNO<br/> MAIAAFRLQPRFLTYPAGEPDLIAEEVK-----RRELIISFQNPGLTPLPARRLLQMMERGLVYVVEDAAREIYGEARLSLFELAREAGYPGVYLGFSKVLSPRVAVAHPEALOKLVOAKGADITPMLNOMLVEHK-E---SERLERVRRVREK</p> <p>KNITIAAKWITGLAFWHVAAGMIIKVKGINDKVEIcFKVKMGLMIFNAIYVDSAPSYPYAFSSASPFQMDVAFQVIAOLIIES-L<br/> AQMHLIREVPKEVRYTRKGMVVMELPKGLSAEGIFRRLEENAFVGGPFANGGGENTRLSYATLDRGIAEGVRRGRALGLIA</p> <p><b>SARST: aliSize=369 (resi) RMSD=12.83 (Å)</b><br/> m--NYARFITAAASAARNPSPIRMTDLSRGPKSMISIAAGLNNMPEKTAviIvenektiofEEMKRA-----LOVPSAIPESLWIKOLqiklhnpptIHYPSOgqmdI CVTSSOOG CKFFMIINP DNIDEASITLISLHPLCNITINASDSSIVPISRDIISWk<br/> -kpISWSEAFGKGAGRIQAST--RELKLTO--GILSFAGGLAELPK-----EAAEAAARILrekevaLOYSTTEYAPRAFVAEWIG----V-R-----PEEVLITISQOAJDLGKVFLEDESPVLEASMAIAAFRLQPRFLTYPAGEPDLIAEEVK</p> <p>WkpedaknpqkntPKITIVNGNPTNSLTSERKFTIYFIARKYDFIITIDPPIYFQNKFRVTFISMD--VDGRRADSES-LISGRIEGLTGPKPLIFRVLHIIVSTIPSTFNLMISQHeWgeeeMAHVDRIIDFSNO<br/> ER-----RRELIISFQNPGLTPLPARRLLQMMERGLVYVVEDAAREIYGEARLSLFELAREAGYPGVYLGFSKVLSPRVAVAHPEALOKLVOAKGADITPMLNOMLVEHK-E---SERLERVRRVREK</p> <p>KeINDVKITIEFKVKMGLMIFNAIYVDSAPSYPYAFSSASPFQMDVAFQVIAOLIIES-L<br/> PKLSAAGLFRRLLEENAFVGGPFANGGGENTRLSYATLDRGIAEGVRRGRALGLIA</p> <p><b>BLAST: aliSize=203 (resi) iden=29.04% (115/396) simi=51.26% (203/396)</b><br/> mnyarfitaasaarnp-----PFTIMTDLISRGPKSMISIAAGLNNMPEKTAviIvenektiofEEMKRAALQVNSAIPESLWIKOLOIkhnpptIHYPSOgqmdI CVTSSOOG CKFFMIINP DNIDEASITLISLHPLCNITINASDSSIVPISR<br/> -----kplswseafgkgagriqastirelkl1qrpg1lsfagglpapelIpkEEA-aEAAARIL-REKGEVLOYSTTEYAPRAFVAEWIG----V-R-----PEEVLITISQOAJDLGKVFLEDESPVLEASMAIAAFRLQPRFLTYPAGEPDLIAEEVK</p> <p>DITISWkpedaknpqkntPKITIVNGNPTNSLTSERKFTIYFIARKYDFIITIDPPIYFQNKFRVTFISMD--VDGRRADSES-LISGRIEGLTGPKPLIFRVLHIIVSTIPSTFNLMISQHeWgeeeMAHVDRIIDFSNO<br/> EVKKE-----RRELIISFQNPGLTPLPARRLLQMMERGLVYVVEDAAREIYGEARLSLFELAREAGYPGVYLGFSKVLSPRVAVAHPEALOKLVOAKGADITPMLNOMLVEHK-E---SERLERVRRVREK</p> <p>V--ITNDVKITIEFKVKMGLMIFNAIYVDSAPSYPYAFSSASPFQMDVAFQVIAOLIIES-L<br/> LpKLS--AGLFRRLLEENAFVGGPFANGGGENTRLSYATLDRGIAEGVRRGRALGLIA</p> <p><b>Proposed: aliSize=383 (resi) RMSD=1.78 (Å)</b><br/> --MNYARFITAAASAARNPSPIRMTDLSRGPKSMISIAAGLNNMPEKTAviIvenektiofEEMKRAALQVNSAIPESLWIKOLOIkhnpptIHYPSOgqmdI CVTSSOOG CKFFMIINP DNIDEASITLISLHPLCNITINASDSSIVPISRDIISWk<br/> kpLSWSEAFGKGAGRIQAST--RELKLTO--GILSFAGGLAELPK-----EAAARIL-REKGEVLOYSTTEYAPRAFVAEWIG----V-R-----PEEVLITISQOAJDLGKVFLEDESPVLEASMAIAAFRLQPRFLTYPAGEPDLIAEEVK</p> <p>knqkntPKITIVNGNPTNSLTSERKFTIYFIARKYDFIITIDPPIYFQNKFRVTFISMD--VDGRRADSES-LISGRIEGLTGPKPLIFRVLHIIVSTIPSTFNLMISQHeWgeeeMAHVDRIIDFSNO<br/> ER-----RRELIISFQNPGLTPLPARRLLQMMERGLVYVVEDAAREIYGEARLSLFELAREAGYPGVYLGFSKVLSPRVAVAHPEALOKLVOAKGADITPMLNOMLVEHK-E---SERLERVRRVREK</p> <p>eFKVKMGLMIFNAIYVDSAPSYPYAFSSASPFQMDVAFQVIAOLIIES-L<br/> RRLEENAFVGGPFANGGGENTRLSYATLDRGIAEGVRRGRALGLIA</p>         |
| 683 | <p>2qlrA (425)</p> <p>2egyD (391)</p> | N | 27.37 | <p><b>TM-align: aliSize=341 (resi) RMSD=2.05 (Å)</b><br/> mnyarfitaasaarnpspirmttdilsrgpkmsmlagglpnpnmfipktav-----LTVEn-GKTIOEGEEMKRALQVNSAIPESLWIKOLOIkhPptIhyppsqqMDI CVTSSOOG CKFFMIINP DNIDEAS<br/> -----kplswseafgkgagriqastirelkl1qrpg1lsfagglpapelIpkEEA-aEAAARILREKGEVLOYSTTEYAPRAFVAEWIG----V-R-----PEEVLITISQOAJDLGKVFLEDESPVLEASMAIAAFRLQPRFLTYPAGEPDLIAEEVK</p> <p>SITLISLHPLCNITINASDSSIVPISRDIISWkpedaknpqkntPKITIVNGNPTNSLTSERKFTIYFIARKYDFIITIDPPIYFQNKFRVTFISMD--VDGRRADSES-LISGRIEGLTGPKPLIFRVLHIIVSTIPSTFNLMISQHeWgeeeMAHVDRIIDFSNO<br/> MAIAAFRLQPRFLTYPAGEPDLIAEEVK-----RRELIISFQNPGLTPLPARRLLQMMERGLVYVVEDAAREIYGEARLSLFELAREAGYPGVYLGFSKVLSPRVAVAHPEALOKLVOAKGADITPMLNOMLVEHK-E---SERLERVRRVREK</p> <p>KNITIAAKWITGLAFWHVAAGMIIKVKGINDKVEIcFKVKMGLMIFNAIYVDSAPSYPYAFSSASPFQMDVAFQVIAOLIIES-L<br/> AQMHLIREVPKEVRYTRKGMVVMELPKGLSAEGIFRRLEENAFVGGPFANGGGENTRLSYATLDRGIAEGVRRGRALGLIA</p> <p><b>SARST: aliSize=372 (resi) RMSD=13.61 (Å)</b><br/> m--NYARFITAAASAARNPSPIRMTDLSRGPKSMISIAAGLNNMPEKTAviIvenektiofEEMKRA-----LOVPSAIPESLWIKOLOIkhnpptIHYPSOgqmdI CVTSSOOG CKFFMIINP DNIDEASITLISLHPLCNITINASDSSIVPISRDIISWk<br/> -kpISWSEAFGKGAGRIQAST--RELKLTO--GILSFAGGLAELPK-----EAAEAAARILrekevaLOYSTTEYAPRAFVAEWIG----V-R-----PEEVLITISQOAJDLGKVFLEDESPVLEASMAIAAFRLQPRFLTYPAGEPDLIAEEVK</p> <p>WkpedaknpqkntPKITIVNGNPTNSLTSERKFTIYFIARKYDFIITIDPPIYFQNKFRVTFISMD--VDGRRADSES-LISGRIEGLTGPKPLIFRVLHIIVSTIPSTFNLMISQHeWgeeeMAHVDRIIDFSNO<br/> ER-----RRELIISFQNPGLTPLPARRLLQMMERGLVYVVEDAAREIYGEARLSLFELAREAGYPGVYLGFSKVLSPRVAVAHPEALOKLVOAKGADITPMLNOMLVEHK-E---SERLERVRRVREK</p> <p>DVKITIEFKVKMGLMIFNAIYVDSAPSYPYAFSSASPFQMDVAFQVIAOLIIES-L<br/> LSAAGLFRRLLEENAFVGGPFANGGGENTRLSYATLDRGIAEGVRRGRALGLIA</p> <p><b>BLAST: aliSize=203 (resi) iden=29.41% (115/391) simi=51.92% (203/391)</b><br/> mnyarfitaasaarnp-----PFTIMTDLISRGPKSMISIAAGLNNMPEKTAviIvenektiofEEMKRAALQVNSAIPESLWIKOLOIkhnpptIHYPSOgqmdI CVTSSOOG CKFFMIINP DNIDEASITLISLHPLCNITINASDSSIVPISR<br/> -----kplswseafgkgagriqastirelkl1qrpg1lsfagglpapelIpkEEA-aEAAARIL-REKGEVLOYSTTEYAPRAFVAEWIG----V-R-----PEEVLITISQOAJDLGKVFLEDESPVLEASMAIAAFRLQPRFLTYPAGEPDLIAEEVK</p> <p>SITISWkpedaknpqkntPKITIVNGNPTNSLTSERKFTIYFIARKYDFIITIDPPIYFQNKFRVTFISMD--VDGRRADSES-LISGRIEGLTGPKPLIFRVLHIIVSTIPSTFNLMISQHeWgeeeMAHVDRIIDFSNO<br/> KKE-----RRELIISFQNPGLTPLPARRLLQMMERGLVYVVEDAAREIYGEARLSLFELAREAGYPGVYLGFSKVLSPRVAVAHPEALOKLVOAKGADITPMLNOMLVEHK-E---SERLERVRRVREK</p> <p>V--ITNDVKITIEFKVKMGLMIFNAIYVDSAPSYPYAFSSASPFQMDVAFQVIAOLIIES-L<br/> LpKLS--AGLFRRLLEENAFVGGPFANGGGENTRLSYATLDRGIAEGVRRGRALGLIA</p> <p><b>Proposed: aliSize=376 (resi) RMSD=1.67 (Å)</b><br/> --MNYARFITAAASAARNPSPIRMTDLSRGPKSMISIAAGLNNMPEKTAviIvenektiofEEMKRAALQVNSAIPESLWIKOLOIkhnpptIHYPSOgqmdI CVTSSOOG CKFFMIINP DNIDEASITLISLHPLCNITINASDSSIVPISRDIISWk<br/> -kpISWSEAFGKGAGRIQAST--RELKLTO--GILSFAGGLAELPK-----EAAARIL-REKGEVLOYSTTEYAPRAFVAEWIG----V-R-----RpeEVLITISQOAJDLGKVFLEDESPVLEASMAIAAFRLQPRFLTYPAGEPDLIAEEVK</p> <p>pedaknpqkntPKITIVNGNPTNSLTSERKFTIYFIARKYDFIITIDPPIYFQNKFRVTFISMD--VDGRRADSES-LISGRIEGLTGPKPLIFRVLHIIVSTIPSTFNLMISQHeWgeeeMAHVDRIIDFSNO<br/> ER-----RRELIISFQNPGLTPLPARRLLQMMERGLVYVVEDAAREIYGEARLSLFELAREAGYPGVYLGFSKVLSPRVAVAHPEALOKLVOAKGADITPMLNOMLVEHK-E---SERLERVRRVREK</p> <p>KeIcFKVKMGLMIFNAIYVDSAPSYPYAFSSASPFQMDVAFQVIAOLIIES-L<br/> EGIFRRLEENAFVGGPFANGGGENTRLSYATLDRGIAEGVRRGRALGLIA</p>    |

684

N

11.64

**TM-align:** aliSize=295 (resi) RMSD=3.14 (Å)

mnyarfitaasaarnpspirtmtidilsrgpksmslaglppnmpfktav-----IIVENKTKIQFGEMMKRALQVSPSAGIPILSWIKOLOIKLhNpPtIhyppsqgqmdICVTSISOOQCKVFEMINPDGNIIDFPAIS  
-----hmnpdliaakrayyetekrdktylaInenppfpedL-----VDEVFRRLNSDALKRITD-SPDETEKLSYL-DT-DF--LS-----KNVSGNADEITVMMLEFD--R-SVFFPITS-CYRIFAKAVGAKF

NINVASesGIVpdSLrdITsRkpedaknpqkTPKFIYVPEngnNTSLTSERKKEIYEIARKYDFIIEDEPFIYFNKFRVPTFSMDVDGRVIRADSP--IISSSGLRIEITGPKPLIERVLIHOVSTHPSTFNLMISOLHewgEGMAHVDRVIDYSNOKDAIAADKWTGLAFWHVPAagMIVKVKGINdvkLIEFVAVGSLMIENAVYDSSAPSPYIASPSSASPQMDVAFQVlaQlikes1  
LEVPILTK--LRI--PE--VN-V-----EGDVFIPNP--SNPCHVFE--EREK--ERILK--TGAFVALIEAVHEH-----GESY-VDFLKKYEVLAVIRTEKAFSAAOVIVYVASEKFDAYNRVRLP--FNVSYSIMFAKVA--D--HR-EIFERTKIVIEERERIKSLRE-MG

glaFHWVPAagMIVKVKGINdvkLIEFVAVGSLMIENAVYDSSAPSPYIASPSSASPQMDVAFQVlaQlikes1  
---YRITDSR--NIVVFM--EKEE--RL--HLRTRN--AVRSFR-----E-GVITIIGKRENDMILRELE--F----

**SARST:** aliSize=293 (resi) RMSD=6.62 (Å)

mnyarfitaasaarnpspirtmtidilsrgpksmslaglppnmpfktavIIVENKTKIQFGEMMKRALQVSPSAGIPILSWIKOLOIKLhNpPtIhyppsqgqmdICVTSISOOQCKVFEMINPDGNIIDFPAIS  
-----hmnpdliaakrayyetekrdktylaInenppfpedL-----VDEVFRRLNSDALKRITD-SPDETEKLSYL-DT-DF--LSKNN-----VSGNADEITVMMLEFDRS----VFFPITS-CYRIFAKAVGAKF

NINVASesGIVpdSLrdITsRkpedaknpqkTPKFIYVPEngnNTSLTSERKKEIYEIARKYDFIIEDEPFIYFNKFRVPTFSMDVDGRVIRADSP--IISSSGLRIEITGPKPLIERVLIHOVSTHPSTFNLMISOLHewgEGMAHVDRVIDYSNOKDAIAADKWTGLAFWHVPAagMIVKVKGINdvkLIEFVAVGSLMIENAVYDSSAPSPYIASPSSASPQMDVAFQVlaQlikes1  
KFLYPLTKDLRI-----PEVN-----VGGDVFIPNP--SNPCHVFE--EREK--ERILK--TGAFVALIEAVHEH-----GESYVDLKKYEVLAIVRTEKAFSAAOVIVYVASEKFDAYNRVRLP--FNVSYSIMFAKVA--D--HR-EIFERTKIVIEERERIKSLRE-MG

glaFHWVPAagMIVKVKGINdvkLIEFVAVGSLMIENAVYDSSAPSPYIASPSSASPQMDVAFQVlaQlikes1  
---NITDSR--NIVVFM--EKEE--RL--HLRTRN--AVRSFR-----E-GVITIIGKRENDMILRELE--F----

**BLAST:** aliSize=61 (resi) iden=10.15% (34/335) simi=18.21% (61/335)

mnyarfitaasaarnpspirtmtidilsrgpksmslaglppnmpfktavIIVENKTKIQFGEMMKRALQVSPSAGIPILSWIKOLOIKLhNpPtIhyppsqgqmdICVTSISOOQCKVFEMINPDGNIIDFPAIS  
-----hmnpdliaakrayyetekrdktylaInenppfpedL-----VDEVFRRLNSDALKRITD-SPDETEKLSYL-DT-DF--LSKNN-----VSGNADEITVMMLEFDRS----VFFPITS-CYRIFAKAVGAKF

rayyetekrdktylaInenppfpedL-----VDEVFRRLNSDALKRITD-SPDETEKLSYL-DT-DF--LSKNN-----VSGNADEITVMMLEFDRS----VFFPITS-CYRIFAKAVGAKF  
KFLYPLTKDLRI-----PEVN-----VGGDVFIPNP--SNPCHVFE--EREK--ERILK--TGAFVALIEAVHEH-----GESYVDLKKYEVLAIVRTEKAFSAAOVIVYVASEKFDAYNRVRLP--FNVSYSIMFAKVA--D--HR-EIFERTKIVIEERERIKSLRE-MG

GRVADSLTSISGLRIEITGPKPLIERVLIHOVSTHPSTFNLMISOLHewgEGMAHVDRVIDYSNOKDAIAADKWTGLAFWHVPAagMIVKVKGINdvkLIEFVAVGSLMIENAVYDSSAPSPYIASPSSASPQMDVAFQVlaQlikes1  
LA--KTIKAFSLAAGVIVYVASEKFDAYNRVRLP--FNVSYSIMFAKVA--D--HR-EIFERTKIVIEERERIKSLRE-MG

vpaagmflwkvkgindvkeleekavkmgvlmpgnafyvdssapsylrasfssaspegmdvafvqlalikes1  
E-K--EK--RL--HLRTRN--AVRSFR-----E-GVITIIGKRENDMILRELE--F----

**Proposed:** aliSize=312 (resi) RMSD=2.69 (Å)

mnyarfitaasaarnpspirtmtidilsrgpksmslaglppnmpfktavIIVENKTKIQFGEMMKRALQVSPSAGIPILSWIKOLOIKLhNpPtIhyppsqgqmdICVTSISOOQCKVFEMINPDGNIIDFPAIS  
-----hmnpdliaakrayyetekrdktylaInenppfpedL-----VDEVFRRLNSDALKRITD-SPDETEKLSYL-DT-DF--LSKNN-----VSGNADEITVMMLEFDRS----VFFPITS-CYRIFAKAVGAKF

wkpedaknpqkTPKFIYVPEngnNTSLTSERKKEIYEIARKYDFIIEDEPFIYFNKFRVPTFSMDVDGRVIRADSP--IISSSGLRIEITGPKPLIERVLIHOVSTHPSTFNLMISOLHewgEGMAHVDRVIDYSNOKDAIAADKWTGLAFWHVPAagMIVKVKGINdvkLIEFVAVGSLMIENAVYDSSAPSPYIASPSSASPQMDVAFQVlaQlikes1  
VegDVVFIIPNP--SNPCHVFE--EREK--ERILK--TGAFVALIEAVHEH-----GESY-VDFLKKYEVLAVIRTEKAFSAAOVIVYVASEKFDAYNRVRLP--FNVSYSIMFAKVA--D--HR-EIFERTKIVIEERERIKSLRE-MG

Indvkeleekavkmgv----LMPGNafyvdssapsylrasfssaspegmdvafvqlalikes1  
E-K--EK--RL--HLRTRN--AVRSFR-----E-GVITIIGKRENDMILRELE--F----

685

N

25.63

**TM-align:** aliSize=341 (resi) RMSD=2.12 (Å)

mnyarfitaasaarnpspirtmtidilsrgpksmslaglppnmpfktav-----IIVENKTKIQFGEMMKRALQVSPSAGIPILSWIKOLOIKLhNpPtIhyppsqgqmdICVTSISOOQCKVFEMINPDGNIIDFPAIS  
-----hmnpdliaakrayyetekrdktylaInenppfpedL-----VDEVFRRLNSDALKRITD-SPDETEKLSYL-DT-DF--LSKNN-----VSGNADEITVMMLEFDRS----VFFPITS-CYRIFAKAVGAKF

TLISLHPLI--CNIN--AS--IIVP--SRDII--SRWkpedaknpqkTPKFIYVPEngnNTSLTSERKKEIYEIARKYDFIIEDEPFIYFNKFRVPTFSMDVDGRVIRADSP--IISSSGLRIEITGPKPLIERVLIHOVSTHPSTFNLMISOLHewgEGMAHVDRVIDYSNOKDAIAADKWTGLAFWHVPAagMIVKVKGINdvkLIEFVAVGSLMIENAVYDSSAPSPYIASPSSASPQMDVAFQVlaQlikes1  
ATIAFRLOIPRFLTPAGEPDLIAEEVKER-----RRL--L--IISFONPTGLTPLPARRLLQVMMERGLVVDVDAAREYVGEALISLFEALAReaGYPGVYLSKSVLSPGLVA--VAHAPEALQKLQAKGAD--TPMLNMLVHE--K-E--SERLEARRVREKAO

TLAFWHVPAagMIVKVKGINdvkLIEFVAVGSLMIENAVYDSSAPSPYIASPSSASPQMDVAFQVlaQlikes1  
MFLDREPKEVRYTRKGMVMMELPKGLSAGER--R--LEEN--AFV--GPFANG--GGENT--L--SYATLDreGIAEGVRRRGRALKGLLALV

**SARST:** aliSize=350 (resi) RMSD=11.60 (Å)

mnyarfitaasaarnpspirtmtidilsrgpksmslaglppnmpfktavIIVENKTKIQFGEMMKRALQVSPSAGIPILSWIKOLOIKLhNpPtIhyppsqgqmdICVTSISOOQCKVFEMINPDGNIIDFPAIS  
-----hmnpdliaakrayyetekrdktylaInenppfpedL-----VDEVFRRLNSDALKRITD-SPDETEKLSYL-DT-DF--LSKNN-----VSGNADEITVMMLEFDRS----VFFPITS-CYRIFAKAVGAKF

TLAFWHVPAagMIVKVKGINdvkLIEFVAVGSLMIENAVYDSSAPSPYIASPSSASPQMDVAFQVlaQlikes1  
EVRVTRKGMVMMELPKGLSAGER--R--LEEN--AFV--GPFANG--GGENT--L--SYATLDreGIAEGVRRRGRALKGLLALV

**BLAST:** aliSize=203 (resi) iden=29.19% (115/394) simi=51.52% (203/394)

mnyarfitaasaarnpspirtmtidilsrgpksmslaglppnmpfktavIIVENKTKIQFGEMMKRALQVSPSAGIPILSWIKOLOIKLhNpPtIhyppsqgqmdICVTSISOOQCKVFEMINPDGNIIDFPAIS  
-----hmnpdliaakrayyetekrdktylaInenppfpedL-----VDEVFRRLNSDALKRITD-SPDETEKLSYL-DT-DF--LSKNN-----VSGNADEITVMMLEFDRS----VFFPITS-CYRIFAKAVGAKF

TLAFWHVPAagMIVKVKGINdvkLIEFVAVGSLMIENAVYDSSAPSPYIASPSSASPQMDVAFQVlaQlikes1  
KLS--AGLFRRLLEEN--AFV--GPFANG--GGENT--L--SYATLDreGIAEGVRRRGRALKGLLALV

**Proposed:** aliSize=381 (resi) RMSD=1.90 (Å)

mnyarfitaasaarnpspirtmtidilsrgpksmslaglppnmpfktavIIVENKTKIQFGEMMKRALQVSPSAGIPILSWIKOLOIKLhNpPtIhyppsqgqmdICVTSISOOQCKVFEMINPDGNIIDFPAIS  
-----hmnpdliaakrayyetekrdktylaInenppfpedL-----VDEVFRRLNSDALKRITD-SPDETEKLSYL-DT-DF--LSKNN-----VSGNADEITVMMLEFDRS----VFFPITS-CYRIFAKAVGAKF

TLAFWHVPAagMIVKVKGINdvkLIEFVAVGSLMIENAVYDSSAPSPYIASPSSASPQMDVAFQVlaQlikes1  
KLS--AGLFRRLLEEN--AFV--GPFANG--GGENT--L--SYATLDreGIAEGVRRRGRALKGLLALV

686

N

28.15

**TM-align:** aliSize=352 (resi) RMSD=2.63 (Å)

mnyarfitaasaarnpspirtmtidilsrgpksmslaglppnmpfktav-----IIVENKTKIQFGEMMKRALQVSPSAGIPILSWIKOLOIKLhNpPtIhyppsqgqmdICVTSISOOQCKVFEMINPDGNIIDFPAIS  
-----hmnpdliaakrayyetekrdktylaInenppfpedL-----VDEVFRRLNSDALKRITD-SPDETEKLSYL-DT-DF--LSKNN-----VSGNADEITVMMLEFDRS----VFFPITS-CYRIFAKAVGAKF

GSN--OSIHP--CNIN--AS--IIVP--SRDII--SRWkpedaknpqkTPKFIYVPEngnNTSLTSERKKEIYEIARKYDFIIEDEPFIYFNKFRVPTFSMDVDGRVIRADSP--IISSSGLRIEITGPKPLIERVLIHOVSTHPSTFNLMISOLHewgEGMAHVDRVIDYSNOKDAIAADKWTGLAFWHVPAagMIVKVKGINdvkLIEFVAVGSLMIENAVYDSSAPSPYIASPSSASPQMDVAFQVlaQlikes1  
S--IN--LAFEOQAKEGP--VND--MRV--LEEKIKEL--A--K--GOKV--LI--IITON--MTSM--R--AL--I--SYL--I--TAN--MRYE--G--D--VPLKAL--N--R--V--GTL--K--I--G--T--R--I--G--W--I--A--E--G--E--I--L--K--L--M--O--K--P--D--I--C--A--P--A--S--Y--A--L--E--Y--K--R--G--Y--E--K--V--H--L--E--G--A--L--G--K--E

OKAI--AAADKW--TGL--WHVPAagMIVKVKGINdvkLIEFVAVGSLMIENAVYDSSAPSPYIASPSSASPQMDVAFQVlaQlikes1  
KRIM--R--LENH--LPN--EFTK--I--G--M--V--M--F--P--E--G--A--G--I--S--F--A--N--L--M--E--R--E--N--V--V--V--V--K--P--E--T--B--S--G--N--A--I--L--N--R--P--K--E--I--P--I--G--I--K--K--A--K--Y--E--K--F

**SARST:** aliSize=355 (resi) RMSD=8.93 (Å)

mnyarfitaasaarnpspirtmtidilsrgpksmslaglppnmpfktavIIVENKTKIQFGEMMKRALQVSPSAGIPILSWIKOLOIKLhNpPtIhyppsqgqmdICVTSISOOQCKVFEMINPDGNIIDFPAIS  
-----hmnpdliaakrayyetekrdktylaInenppfpedL-----VDEVFRRLNSDALKRITD-SPDETEKLSYL-DT-DF--LSKNN-----VSGNADEITVMMLEFDRS----VFFPITS-CYRIFAKAVGAKF

TLAFWHVPAagMIVKVKGINdvkLIEFVAVGSLMIENAVYDSSAPSPYIASPSSASPQMDVAFQVlaQlikes1  
MRE--E--V--V--V--V--K--P--E--T--B--S--G--N--A--I--L--N--R--P--K--E--I--P--I--G--I--K--K--A--K--Y--E--K--F

**BLAST:** aliSize=227 (resi) iden=32.84% (133/405) simi=56.05% (227/405)

mnyarfitaasaarnpspirtmtidilsrgpksmslaglppnmpfktavIIVENKTKIQFGEMMKRALQVSPSAGIPILSWIKOLOIKLhNpPtIhyppsqgqmdICVTSISOOQCKVFEMINPDGNIIDFPAIS  
-----hmnpdliaakrayyetekrdktylaInenppfpedL-----VDEVFRRLNSDALKRITD-SPDETEKLSYL-DT-DF--LSKNN-----VSGNADEITVMMLEFDRS----VFFPITS-CYRIFAKAVGAKF

TLAFWHVPAagMIVKVKGINdvkLIEFVAVGSLMIENAVYDSSAPSPYIASPSSASPQMDVAFQVlaQlikes1  
MRE--E--V--V--V--V--K--P--E--T--B--S--G--N--A--I--L--N--R--P--K--E--I--P--I--G--I--K--K--A--K--Y--E--K--F

**Proposed:** aliSize=385 (resi) RMSD=2.04 (Å)

mnyarfitaasaarnpspirtmtidilsrgpksmslaglppnmpfktavIIVENKTKIQFGEMMKRALQVSPSAGIPILSWIKOLOIKLhNpPtIhyppsqgqmdICVTSISOOQCKVFEMINPDGNIIDFPAIS  
-----hmnpdliaakrayyetekrdktylaInenppfpedL-----VDEVFRRLNSDALKRITD-SPDETEKLSYL-DT-DF--LSKNN-----VSGNADEITVMMLEFDRS----VFFPITS-CYRIFAKAVGAKF

TLAFWHVPAagMIVKVKGINdvkLIEFVAVGSLMIENAVYDSSAPSPYIASPSSASPQMDVAFQVlaQlikes1  
MRE--E--V--V--V--V--K--P--E--T--B--S--G--N--A--I--L--N--R--P--K--E--I--P--I--G--I--K--K--A--K--Y--E--K--F



|     |                                       |   |                                                                                                                                                                                                                                                                                                                                                                                                                                                                                                                                                                                                                                                                                                                                                                                                                                                                                                                                                                                                                                                                                                                                                                                                                                                                                                                                                                                                                                                                                                                                                                                                                                                                        |
|-----|---------------------------------------|---|------------------------------------------------------------------------------------------------------------------------------------------------------------------------------------------------------------------------------------------------------------------------------------------------------------------------------------------------------------------------------------------------------------------------------------------------------------------------------------------------------------------------------------------------------------------------------------------------------------------------------------------------------------------------------------------------------------------------------------------------------------------------------------------------------------------------------------------------------------------------------------------------------------------------------------------------------------------------------------------------------------------------------------------------------------------------------------------------------------------------------------------------------------------------------------------------------------------------------------------------------------------------------------------------------------------------------------------------------------------------------------------------------------------------------------------------------------------------------------------------------------------------------------------------------------------------------------------------------------------------------------------------------------------------|
| 690 | <p>2r7hA (157)</p> <p>1s3zB (145)</p> | C | <p>18.62</p> <p><b>TM-align:</b> aliSize=134 (resi) RMSD=2.41 (Å)<br/> avaFRROVLPQDALLVRRVVEsTgFFTPPEADVAQELVDHhHACGYHFVFATEDDAGYCYGPTPA-----TEGTYDYWIAVAPHROHSLGRALLAEVVDVRLTGGLLFAETSgIRKYAPTRRFYERAGFSAEAVLKafYRagddkiiyrleva---<br/> -MDIRQMNK-THLEHWGLRKLQ-LWP-GHPDdAHLADGEEILQADHLASFIAMAGVAIGFADASIRHDYvngcdSSPVVFEGLFVLSFRQRVAKQLIAAQRWGTNKCCEMASDTSPE--NTISOKVHQALGHEETERVI-FYR-----krc</p> <p><b>SARST:</b> aliSize=130 (resi) RMSD=3.89 (Å)<br/> avaFRROVLPQDALLVRRVVESTGFFTPPEADVAQELVDHhHACGYHFVFATEDDAGYCYG-----PTPA--TEGTYDYWIAVAPHROHSLGRALLAEVVDVRLTGGLLFAETSgIRKYAPTRRFYERAGFSAEAVLK-----afyragddkiiyrleva<br/> ---mDIRQMNKTHLEHWGLRKLQWpGHPDdAHLADGEEILQADHLASFIAMAGVAIGFADASIRHDYvngcdSSPVVFEGLFVLSFRQRVAKQLIAAQRWGTNKCCEMASDTS--PENTISOKVHQALGHEETERVI-FYRkrc-----</p> <p><b>BLAST:</b> aliSize=54 (resi) iden=22.76% (33/145) simi=37.24% (54/145)<br/> avafrqqvlpqdallvrrvestgiff-----PEADVVAQELVDHhHACGYHFVFATEDDDAGI--AG-YGTPATGtydlywIAVAPHROHSLGRALLAEVVDVRLTGGLLFAETSgIRKYAPTRRFYERAGFSAEAVLKafYR--agddkiiy<br/> -----mDirqmnkthlehwgrlqklwpghPDDAHLAdgEELQADHLasfiAMADVAIGFADASIRHDYvngcdSSPVVFEGLFVLSFRQRVAKQLIAAQRWGTNKCCEMASDTS--PENTISOKVHQALGHEETERVI--FYRkrc-----<br/> rleva<br/> -----</p> <p><b>Proposed:</b> aliSize=138 (resi) RMSD=2.17 (Å)<br/> avaFRROVLPQDALLVRRVVEsTgFFTPPEADVAQELVDHhHACGYHFVFATEDDMAGYCYGPTPA-----TEGTYDYWIAVAPHROHSLGRALLAEVVDVRLTGGLLFAETSgIRKYAPTRRFYERAGFSAEAVLkafyragddkiiYRLEV-a<br/> -MDIRQMNK-THLEHWGLRKLQ-LWP-GHPDdAHLADGEEILQADHLASFIAMAGVAIGFADASIRHDYvngcdSSPVVFEGLFVLSFRQRVAKQLIAAQRWGTNKCCEMASDTSPE--NTISOKVHQALGHEETERVI-----FYRKRCC-</p>                                                 |
| 691 | <p>2r7hA (157)</p> <p>1s5kA (153)</p> | C | <p>15.69</p> <p><b>TM-align:</b> aliSize=136 (resi) RMSD=2.57 (Å)<br/> -----AVAFRRQVLPQDALLVRRVVEsTgFFTPPEADVAQELVDHhHACGYHFVFATEDDAGYCYGPTPA-----TEGTYDYWIAVAPHROHSLGRALLAEVVDVRLTGGLLFAETSgIRKYAPTRRFYERAGFSAEAVLKafYRagddkiiyrleva---<br/> glvprgshMDIRQMNK-THLEHWGLRKLQ-LWPGHPDdAHLADGEEILQADHLASFIAMAGVAIGFADASIRHDYvngcdSSPVVFEGLFVLSFRQRVAKQLIAAQRWGTNKCCEMASDTSPE--NTISOKVHQALGHEETERVI-FYR-----krc</p> <p><b>SARST:</b> aliSize=130 (resi) RMSD=3.81 (Å)<br/> av-----AFRRQVLPQDALLVRRVVESTGFFTPPEADVAQELVDHhHACGYHFVFATEDDAGYCYG-----PTPA--TEGTYDYWIAVAPHROHSLGRALLAEVVDVRLTGGLLFAETSgIRKYAPTRRFYERAGFSAEAVLK-----afyragddkiiyrleva<br/> --glvprgshMDIRQMNKTHLEHWGLRKLQWpGHPDdAHLADGEEILQADHLASFIAMAGVAIGFADASIRHDYvngcdSSPVVFEGLFVLSFRQRVAKQLIAAQRWGTNKCCEMASDTSPE--NTISOKVHQALGHEETERVI-FYRkrc-----</p> <p><b>BLAST:</b> aliSize=54 (resi) iden=21.57% (33/153) simi=35.29% (54/153)<br/> avafrqqvlpqdallvrrvestgiff-----PEADVVAQELVDHhHACGYHFVFATEDDDAGI--AG-YGTPATGtydlywIAVAPHROHSLGRALLAEVVDVRLTGGLLFAETSgIRKYAPTRRFYERAGFSAEAVLKafYR--<br/> -----glvprgshMDIRQMNKthlehwgrlqklwpghPDDAHLAdgEELQADHLasfiAMADVAIGFADASIRHDYvngcdSSPVVFEGLFVLSFRQRVAKQLIAAQRWGTNKCCEMASDTS--PENTISOKVHQALGHEETERVI--FYRkrc-----<br/> agddkiiyrleva<br/> -----</p> <p><b>Proposed:</b> aliSize=138 (resi) RMSD=2.20 (Å)<br/> -----AVAFRRQVLPQDALLVRRVVEsTgFFTPPEADVAQELVDHhHACGYHFVFATEDDMAGYCYGPTPA-----TEGTYDYWIAVAPHROHSLGRALLAEVVDVRLTGGLLFAETSgIRKYAPTRRFYERAGFSAEAVLKafyragddkiiYRLEV-a<br/> glvprgshMDIRQMNK-THLEHWGLRKLQ-LWPGHPDdAHLADGEEILQADHLASFIAMAGVAIGFADASIRHDYvngcdSSPVVFEGLFVLSFRQRVAKQLIAAQRWGTNKCCEMASDTSPE--NTISOKVHQALGHEETERVI-FYR-----RKRCC-----</p> |
| 692 | <p>2r7hA (157)</p> <p>1ufhA (155)</p> | C | <p>12.26</p> <p><b>TM-align:</b> aliSize=135 (resi) RMSD=3.49 (Å)<br/> AVAFRRQVLPQDALLVRRVVEsTgFFTPPEADVAQELVDHhHACGYHFVFATEDDAGYCYGPTPA-----TEGTYDYWIAVAPHROHSLGRALLAEVVDVRLTGGLLFAETSgIRKYAPTRRFYERAGFSAEAVLKafYRagddkiiyrleva-<br/> TlMLTPMQTEEFRSYLYTYT--KHyaEekvkagtwlpedaAQILSKQVFTDLPRLGLETPHHLWSLKLNEKIVWLIHAEpEHpQOEAFIDFGLYEPYRKGQYAKQALALDQAAASMGTRKLSLHVFA--HNQTARKLYEQTGFQETDV-VM---SKK-----1</p> <p><b>SARST:</b> aliSize=126 (resi) RMSD=5.82 (Å)<br/> avafrqqvlpqdallvrrvestgiffTPPEADVAQELVDHhHAC-----GYHFVFATEDDDA--YACYGPTPAT-EGTYDYWIAVAPHROHSLGRALLAEVVDVRLTGGLLFAETSgIRKYAPTRRFYERAGFSAEAVL-----kafyragddkiiyrleva<br/> -----timltpmqteefrsylTYTtkHYAEKVKAGTWLPEDAQLLSKQVFTDLPRLGletpHHHLWSLKLNEKIVWLIHAEpEHpQOEAFIDFGLYEPYRKGQYAKQALALDQAAASMGTRKLSLHVFA--FAHNQTARKLYEQTGFQETDVVmskkl-----</p> <p><b>BLAST:</b> aliSize=50 (resi) iden=21.94% (34/155) simi=32.26% (50/155)<br/> avafrqqvlpqdallvrrvestgiffTPPEADVAQELVDHhHAC-----YHFVFA--T-PAEG-TYD--YwiavAPHROHSLGRALLAEVVDVRLTGGLLFAETSgIRKYAPTRRFYERAGFSAEAVL-----kafy<br/> -----timltpmqteefrsylTYTtkHYAEKVKAGTWLPEDAQLLSKQVFTDLPRLGletpHHHLWSLKLNEKIVWLIHAEpEHpQOEAFIDFGLYEPYRKGQYAKQALALDQAAASMGTRKLSLHVFA--FAHNQTARKLYEQTGFQETDVVmskkl-----<br/> agddkiiyrleva<br/> -----</p> <p><b>Proposed:</b> aliSize=127 (resi) RMSD=2.52 (Å)<br/> avAFRRQVLPQDALLVRRVVEsTgFFTPPEADVAQELVDHhHACGYHFVFATEDDMAGYACYGPTPAT-EGTYDYWIAVAPHROHSLGRALLAEVVDVRLTGGLLFAETSgIRKYAPTRRFYERAGFSAEAVLkafyragddkiiYRLEV-a<br/> --tIMLTPMQTEEFRSYTYTtkHYAEKVKAGTWLPEDAQLLSKQVFTDLPRLGletpHHHLWSLKLNEKIVWLIHAEpEHpQOEAFIDFGLYEPYRKGQYAKQALALDQAAASMGTRKLSLHVFA--FAHNQTARKLYEQTGFQETDV-----VMSKKL--</p>             |

|     |                                       |   |                                                                                                                                                                                                                                                                                                                                                                                                                                                                                                                                                                                                                                                                                                                                                                                                                                                                                                                                                                                                                                                                                                                                                                                                                                                                                                                                                                                                                                                                                                                                                                                                                                                                         |
|-----|---------------------------------------|---|-------------------------------------------------------------------------------------------------------------------------------------------------------------------------------------------------------------------------------------------------------------------------------------------------------------------------------------------------------------------------------------------------------------------------------------------------------------------------------------------------------------------------------------------------------------------------------------------------------------------------------------------------------------------------------------------------------------------------------------------------------------------------------------------------------------------------------------------------------------------------------------------------------------------------------------------------------------------------------------------------------------------------------------------------------------------------------------------------------------------------------------------------------------------------------------------------------------------------------------------------------------------------------------------------------------------------------------------------------------------------------------------------------------------------------------------------------------------------------------------------------------------------------------------------------------------------------------------------------------------------------------------------------------------------|
| 693 | <p>2r7hA (157)</p> <p>lufhB (154)</p> | C | <p>12.99</p> <p><b>TM-align:</b> aliSize=135 (resi) RMSD=3.13 (Å)<br/> a-VAFRRqVLPDALLVRRVVEstgFFTP-----E-EADVAQE-LVDEHLHACGYHFVFATE--DDAGYACYGPT-PATEGTYDLYWIAVAPHROHSLGRALLAEVVDVRLTGGRLFAETSGIRKYAPTRRFYERAGFSAEAVLKAFYAGDdkiiyrleva---<br/> -IMLTP-MQTEEFRSYLTYT--KHYAEEKvkagtwlpedaQLLSKQVFTD-LPRGLETPHHLWLSLKLnek-IVGWLWIHAEPHQEAFIDFGLYEPYRGGYAKQALALDQAAASMIIRKSLHVFA--HNQTARKLYEQTGFQETDVMV---SKK-----1</p> <p><b>SARST:</b> aliSize=126 (resi) RMSD=5.82 (Å)<br/> avafrrqvl-----PODALLVRRVVEST--FFTPPEADVAQELVDEHLHAC-----GYHFVFATEDDDAG-YACYGPTPATE--GTYDLYWIAVAPHROHSLGRALLAEVVDVRLTGGRLFAETSGIRKYAPTRRFYERAGFSAEAVL---kafyragddkiiyrleva<br/> -----imltpmqteefrsylTYTtkHYAEKVKAFTWLPEDAQLLSKQVFTD-LPRGLETPHHLWLSLKLnekIvGWLWIHAEPHQEAFIDFGLYEPYRGGYAKQALALDQAAASMIIRKSLHVFA--FAHNQTARKLYEQTGFQETDVMVmskkl-----</p> <p><b>BLAST:</b> aliSize=50 (resi) iden=22.08% (34/154) simi=32.47% (50/154)<br/> avafrrqvlpqdallvrrvest-----FFTPPEADVAQELVDEHLHAC-----YHFVFA--TEDDAGYACYG--T-ATSG-TYD--GywiavAPHQhSLGRALLAEVVDVRLTGGRLFAETSGIRKYAPTRRFYERAGFSAEAVL---kafyragddkiiyrleva<br/> -----imltpmqteefrsyltytthyaeeekvkaFTWLPEDAQLLSKQVFTD-LPRGLETPHHLWS1k1NEK-IVGWLWIHAEPHQEAFIDFGLYEPYRGGYAKQALALDQAAASMIIRKSLHVFAHNQTA--RKLVEQTGFQETDVMVmskkl-----</p> <p><b>Proposed:</b> aliSize=131 (resi) RMSD=2.45 (Å)<br/> a-VAFRRqVLPDALLVRRVVEstgFFTP-----PE-EaD-VaQE--L-vdHmHACGYHFVFATE--DDAGYACYGPT-PATEGTYDLYWIAVAPHROHSLGRALLAEVVDVRLTGGRLFAETSGIRKYAPTRRFYERAGFSAEAVLKAFYAGDdkiiyrleva<br/> -IMLTP-MQTEEFRSYLTYT--KHYAEEKvkagtwlpedaQLLSKQVFTD-LPRGLETPHHLWLSLKLnek-IVGWLWIHAEPHQEAFIDFGLYEPYRGGYAKQALALDQAAASMIIRKSLHVFA--HNQTARKLYEQTGFQETDVMVmskkl-----</p> |
| 694 | <p>2r7hA (157)</p> <p>2fe7B (166)</p> | C | <p>15.92</p> <p><b>TM-align:</b> aliSize=138 (resi) RMSD=2.80 (Å)<br/> -----AVAFRRqVLPDALLVRRVVEST-GFF--TPPEADVAQELVDEHLHACGYHFVFATEDDDAGYACYGPTPATE--EGTYDLYWIAVAPHROHSLGRALLAEVVDVRLTGGRLFAETSGIRKYAPTRRFYERAGFSAEAVLKAFYAGDdkiiyrleva-----<br/> enlyfqghmTLEIRP-AVPAEAQELAFITELadyEraRHVVTDVEGIRRSLEAEGSPTRALMCLSEGRPIGYAVFFYSYStwlgRNGIYEDLYTPEYRGVAGRRRLRELAREAVANDCGREWSVLD-W-NQPAIDFYSICALPQDEWVRYR-----ldgealrkmae</p> <p><b>SARST:</b> aliSize=124 (resi) RMSD=4.48 (Å)<br/> a-----VAFRROVLPDALLVRRVVE-----STGFFTPPEADVAQELVDEHLHACGYHFVFATEDDDAGYACYGPTPATE--EGTYDLYWIAVAPHROHSLGRALLAEVVDVRLTGGRLFAETSGIRKYAPTRRFYERAGFSAEAVLKAFYAGDdkiiyrleva<br/> -enlyfqghmTLEIRP-AVPAEAQELAFITELadyEraRHVVTDVEGIRRSLEAEGSPTRALMCLSEGRPIGYAVFFYSYStwlgRNGIYEDLYTPEYRGVAGRRRLRELAREAVANDCGREWSVLD-W-NQPAIDFYSICALPQDEWVRYRldgealrkmae-----</p> <p><b>BLAST:</b> aliSize=33 (resi) iden=18.06% (28/157) simi=21.29% (33/157)<br/> avafrrqvlpqdallvrrvestgfftpeadvaqelvdhhlhac-----enlyfqghmTLEIRP-AVPAEAQELAFITELadyEraRHVVTDVEGIRRSLEAEGSPTRALMCLSEGRPIGYAVFFYSYStwlgRNGIYEDLYTPEYRGVAGRRRLRELAREAVANDCGREWSVLD-W-NQPAIDFYSICALPQDEWVRYRldgealrkmae-----</p> <p><b>Proposed:</b> aliSize=142 (resi) RMSD=2.19 (Å)<br/> -----AVAFRRqVLPDALLVRRVVEST-GFF-TPPEADVAQELVDEHLHACGYHFVFATEDDDAGYACYGPTPATE--EGTYDLYWIAVAPHROHSLGRALLAEVVDVRLTGGRLFAETSGIRKYAPTRRFYERAGFSAEAVLKAFYAGDdkiiyrleva<br/> enlyfqghmTLEIRP-AVPAEAQELAFITELadyEraRHVVTDVEGIRRSLEAEGSPTRALMCLSEGRPIGYAVFFYSYStwlgRNGIYEDLYTPEYRGVAGRRRLRELAREAVANDCGREWSVLD-W-NQPAIDFYSICALPQDEWVRYRldgealrkmae-----</p>                                                                                                   |
| 695 | <p>2r7hA (157)</p> <p>2vbqA (147)</p> | C | <p>16.33</p> <p><b>TM-align:</b> aliSize=136 (resi) RMSD=2.64 (Å)<br/> -AVAFRRqVLPDALLVRRVVEST--FFTPPEADVAQELVDEHLHACGYHFVFATEDDDAGYACYGPTPATE--EGTYDLYWIAVAPHROHSLGRALLAEVVDVRLTGGRLFAETSGIRKYAPTRRFYERAGFSAEAVLKAFYAGDdkiiyrleva---<br/> sHMDIRQMNKTHL-EHWGRLRQ--LWPGHPDHAHLADGEEITLQADHLASFIAMAGVATGFADASIRHDyngcdSSPVVFEGLFVLSFRQRVAKQITAAVQRWGTNKCCEMASDTSPE--NTISQKVHQAALGFEETERVITFY-----krc</p> <p><b>SARST:</b> aliSize=131 (resi) RMSD=3.70 (Å)<br/> a-VAFRROVLPDALLVRRVVEST--FFTPPEADVAQELVDEHLHACGYHFVFATEDDDAGYACYGPTPATE--EGTYDLYWIAVAPHROHSLGRALLAEVVDVRLTGGRLFAETSGIRKYAPTRRFYERAGFSAEAVLKAFYAGDdkiiyrleva<br/> -sHMDIRQMNKTHL-EHWGRLRQ--LWPGHPDHAHLADGEEITLQADHLASFIAMAGVATGFADASIRHDyngcdSSPVVFEGLFVLSFRQRVAKQITAAVQRWGTNKCCEMASDTSPE--PENTISQKVHQAALGFEETERVITFY-----krc</p> <p><b>BLAST:</b> aliSize=54 (resi) iden=22.45% (33/147) simi=36.73% (54/147)<br/> avafrrqvlpqdallvrrvestgfft-----shmdiRQMNKTHL-EHWGRLRQ--LWPGHPDHAHLADGEEITLQADHLASFIAMAGVATGFADASIRHDyngcdSSPVVFEGLFVLSFRQRVAKQITAAVQRWGTNKCCEMASDTSPE--PENTISQKVHQAALGFEETERVITFY-----krc</p> <p><b>Proposed:</b> aliSize=138 (resi) RMSD=2.27 (Å)<br/> -AVAFRRqVLPDALLVRRVVEST--FFTPPEADVAQELVDEHLHACGYHFVFATEDDDAGYACYGPTPATE--EGTYDLYWIAVAPHROHSLGRALLAEVVDVRLTGGRLFAETSGIRKYAPTRRFYERAGFSAEAVLKAFYAGDdkiiyrleva<br/> sHMDIRQMNKTHL-EHWGRLRQ--LWPGHPDHAHLADGEEITLQADHLASFIAMAGVATGFADASIRHDyngcdSSPVVFEGLFVLSFRQRVAKQITAAVQRWGTNKCCEMASDTSPE--PENTISQKVHQAALGFEETERVITFY-----krc</p>                                                                                                                                                                                               |



|     |                                               |   |       |                                                                                                                                                                                                                                                                                                                                                                                                                                                                                                                                                                                                                                                                                                                                                                                                                                                                                                                                                                                                                                                                                                                                                                                                                                                                                                                                                                                                                                                                                                                                                                                                                                         |
|-----|-----------------------------------------------|---|-------|-----------------------------------------------------------------------------------------------------------------------------------------------------------------------------------------------------------------------------------------------------------------------------------------------------------------------------------------------------------------------------------------------------------------------------------------------------------------------------------------------------------------------------------------------------------------------------------------------------------------------------------------------------------------------------------------------------------------------------------------------------------------------------------------------------------------------------------------------------------------------------------------------------------------------------------------------------------------------------------------------------------------------------------------------------------------------------------------------------------------------------------------------------------------------------------------------------------------------------------------------------------------------------------------------------------------------------------------------------------------------------------------------------------------------------------------------------------------------------------------------------------------------------------------------------------------------------------------------------------------------------------------|
| 696 | <p>2r7hA<br/>(157)</p> <p>2vbqB<br/>(144)</p> | C | 16.67 | <p><b>TM-align:</b> aliSize=133 (resi) RMSD=2.43 (Å)<br/> avAFRRVLPDALLVRRVVEsTgFFTPPEADVAQELVDHhHhCGYHFVFAEDDDAGYCYGPTPA-----TEGTYDYLWIAAAPHROHSLGRALEAVHDVRLTGRLLFAETSgIrKYAPTRRFYERAGFSAEAVLKafYRagddkiIyrleVa---<br/> --DIRQMNK-TLHEHWGLRKLQ-LWP-GHPDdAHLADGEEILQADHLASFIAMAGVAIGFADASIRHDYvngcdSSPVVFEGLFVLSFRQRVAKQIIAAVQRWGTNKCCEMASDTSPE--NTISQKVHQALGFEETERVI-FYR-----krc</p> <p><b>SARST:</b> aliSize=127 (resi) RMSD=3.80 (Å)<br/> avafrr---VLPDALLVRRVVESTGF-FTPPEADVAQELVDHhHhCGYHFVFAEDDDAGYCYG-----PTPA--TEGTYDYLWIAAAPHROHSLGRALEAVHDVRLTGRLLFAETSgIrKYAPTRRFYERAGFSAEAVLK-----afyragddkiIyrleVa<br/> -----dirQMNKTHLEHWGLRKLQ-LWP-GHPDdAHLADGEEILQADHLASFIAMAGVAIGFADASIRHDYvngcdSSPVVFEGLFVLSFRQRVAKQIIAAVQRWGTNKCCEMASDTSPE--NTISQKVHQALGFEETERVI-fyrkrc-----</p> <p><b>BLAST:</b> aliSize=54 (resi) iden=22.92% (33/144) simi=37.50% (54/144)<br/> avafrrqvlpqdallvrrvestgiff-----TEEDVVA--OELVD-ETH--HhCGYHFVFAEDDDAGYCYG-----AG-YGPTPATGtydlywIAAAPHROHSLGRALEAVHDVRLTGRLLFAETSgIrKYAPTRRFYERAGFSAEAVLKafYR---agddkiIyr<br/> -----dirqmnkthlehwgrlqkqwpghPDDHLAGDEEILQADHLASFIAMAGVAIGFADASIRHDYvngcdSSPVVFEGLFVLSFRQRVAKQIIAAVQRWGTNKCCEMASDTSPE--NTISQKVHQALGFEETERVI--FYRkrc-----<br/> leva<br/> ----</p> <p><b>Proposed:</b> aliSize=137 (resi) RMSD=2.20 (Å)<br/> avAFRRVLPDALLVRRVVEsTgFFTPPEADVAQELVDHhHhCGYHFVFAEDDDAGYCYGPTPA-----TEGTYDYLWIAAAPHROHSLGRALEAVHDVRLTGRLLFAETSgIrKYAPTRRFYERAGFSAEAVLKafyragddKIYRLEVa<br/> --DIRQMNK-TLHEHWGLRKLQ-LWP-GHPDdAHLADGEEILQADHLASFIAMAGVAIGFADASIRHDYvngcdSSPVVFEGLFVLSFRQRVAKQIIAAVQRWGTNKCCEMASDTSPE--NTISQKVHQALGFEETERVI-----IFYRKRc--</p>                 |
| 697 | <p>2rbbA<br/>(129)</p> <p>ljc5D<br/>(145)</p> | C | 12.40 | <p><b>TM-align:</b> aliSize=63 (resi) RMSD=2.95 (Å)<br/> nadlsyvniftrdivasafyqOVFGFqeiiesirspifrgldt-----GKScigfnahEayelqlaqfsetsgi-----KELLNFDVtkeAVDKLVPVAIAAATLIK-AYETYYHWYQAVL<br/> -----EDLFI-----cidhvayacpdadeaskyyqetfgwhelhrenpeqgvveimmapaaklteHMT-----qyvmapIndestvakwlakhnragLHHMAWRV---DIDAVSATLRERVQLLYDEKLGTTGGRINFM</p> <p>L--DPERNVFRINNVL--<br/> HpkSGKGVLIELTOYPkn</p> <p><b>SARST:</b> aliSize=116 (resi) RMSD=12.78 (Å)<br/> na-----DLSY-NIFTR-IVAMSAFYQOVFCFOEIESiRSP-----IFRGLDTG-----KSCIGFNH-----AHAYELOLOAFSETSGIKFLNFDVtkeAVDKLVPVAIAAATLIK-AYETYYHWYQAVLDPD--RNVFRINNV---1<br/> --edlficIDHAYACPaDEASKYQETFCWHELHthreeNPEQGV-VEIMMAPaaklteHMTQVQVmapIndestvakwlakhnragLH---HMAWRVDDIDAV---SATLRERVQLLYDEKLGTTGGRINFMHPKsgkGVLIELTOYPkn-</p> <p><b>BLAST:</b> aliSize=13 (resi) iden=6.35% (8/129) simi=10.32% (13/129)<br/> nadlsyvniftrdiv-----ASAFYQOVFCFOEIESIRSP-----IFRGLDTG-----KSCIGFNH-----AHAYELOLOAFSETSGIKFLNFDVtkeAVDKLVPVAIAAATLIK-AYETYYHWYQAVLDPD--RNVFRINNV---1<br/> --edlficIDHAYACPaDEASKYQETFCWHELHthreeNPEQGV-VEIMMAPaaklteHMTQVQVmapIndestvakwlakhnragLH---HMAWRVDDIDAV---SATLRERVQLLYDEKLGTTGGRINFMHPKsgkGVLIELTOYPkn-<br/> sgikflnfdvdtkeavdklvpvaiaagatlkapetyyhwyqavlldpernvfrinnvl<br/> -----</p> <p><b>Proposed:</b> aliSize=107 (resi) RMSD=1.86 (Å)<br/> -NMA-DLSY-NIFTR-IVAMSAFYQOVFCFOEIESiRSP-----IFRGLDTG-----KSCIGFNH-----AHAYELOLOAFSETSGIKFLNFDVtkeAVDKLVPVAIAAATLIK-AYETYYHWYQAVLDPD--RNVFRINNV---1<br/> edlficIDHAYACPaDEASKYQETFCWHELHthreeNPEQGV-VEIMMAPaaklteHMTQVQVmapIndestvakwlakhnragLH---HMAWRVDDIDAV---SATLRERVQLLYDEKLGTTGGRINFMHPKsgkGVLIELTOYPkn</p>      |
| 698 | <p>2vi7A<br/>(163)</p> <p>lqsmD<br/>(152)</p> | C | 17.11 | <p><b>TM-align:</b> aliSize=140 (resi) RMSD=3.30 (Å)<br/> ---TIRLERYSRHVECLTAYNDPAVARQVLOMPYOSVEORRKRHSDDDRLLILVALH--OGDVTCASLEOPRIR-R-SHSGSfGmGVAWA--WOGKVCVSRLLGELLIIADnWMNLRRVELTVYTDNAPALAYRFFETEgemrdyavrdgrfvdvysmarlrr---<br/> sednITVRFVTENDKEGWQRWKS--YQDFYEVSPDLDLDFNFRFLDPNIKMWAAVAVESSSEKILGMINFFNMTTWDFKDIYINDLYdenSRVKGAGGKIQFVYDEAD-KLGTSPSYWCTDESNRHQLYVVKVYKAPKILYKR-----kgy</p> <p><b>SARST:</b> aliSize=139 (resi) RMSD=4.93 (Å)<br/> t---TIRLERYSRHVECLTAYNDPAVARQVLOMPYOSVEORRKRHSDDDRLLILVALH--OGDVTCASLEOPRIR-R-SHSGSfGmGVAWA--WOGKVCVSRLLGELLIIADnWMNLRRVELTVYTDNAPALAYRFFETEgemrdyavrdgrfvdvysmarlrr---<br/> --sednITVRFVTENDKEGWQRWKS--YQDFYEVSPDLDLDFNFRFLDPNIKMWAAVAVESSSEKILGMINFFNMTTWDFKDIYINDLYdenSRVKGAGGKIQFVYDEAD-KLGTSPSYWCTDESNRHQLYVVKVYKAPKILYKR-----kgy</p> <p><b>BLAST:</b> aliSize=24 (resi) iden=10.53% (16/152) simi=15.79% (24/152)<br/> tirle ryserhvegltal yndpavarqvlompysveqrrkrhdsddrllilvalhagdvgisaseqhpri rrrshsgsigmgvavawqg-----sednitrvtendkegwqrlwksyqdfyevsfpddlddfnfrfldpnikmwaavavesssekiigminffnhmttwdfkdi yindlydensrv<br/> VCSRLGELLIIADN-----M--NLRVVEITVYTD--NAPALAYRFFETEgemrdyavrdgrfvdvysmarlrr<br/> GAGGKIQFVYDEADKlgtpsvyCTdeSNHRAQLVVKVYKAPKILYKR--GY-----</p> <p><b>Proposed:</b> aliSize=135 (resi) RMSD=2.40 (Å)<br/> ---TIRLERYSRHVECLTAYNDPAVARQVLOMPYOSVEORRKRHSDDDRLLILVALH--OGDVTCASLEOPRIR-R-SHSGSfGmGVAWA--WOGKVCVSRLLGELLIIADnWMNLRRVELTVYTDNAPALAYRFFETEgemrdyavrdgrfvdvysmarlrr---<br/> sednITVRFVTENDKEGWQRWKS--YQDFYEVSPDLDLDFNFRFLDPNIKMWAAVAVESSSEKILGMINFFNMTTWDFKDIYINDLYdenSRVKGAGGKIQFVYDEAD-KLGTSPSYWCTDESNRHQLYVVKVYKAPKILYKR-----kgy</p> |

|     |                                       |   |                                                                                                                                                                                                                                                                                                                                                                                                                                                                                                                                                                                                                                                                                                                                                                                                                                                                                                                                                                                                                                                                                                                                                                                                                                                                                                                                                                                                                                                                                                                                                                                                                                                                                                                                                                                         |
|-----|---------------------------------------|---|-----------------------------------------------------------------------------------------------------------------------------------------------------------------------------------------------------------------------------------------------------------------------------------------------------------------------------------------------------------------------------------------------------------------------------------------------------------------------------------------------------------------------------------------------------------------------------------------------------------------------------------------------------------------------------------------------------------------------------------------------------------------------------------------------------------------------------------------------------------------------------------------------------------------------------------------------------------------------------------------------------------------------------------------------------------------------------------------------------------------------------------------------------------------------------------------------------------------------------------------------------------------------------------------------------------------------------------------------------------------------------------------------------------------------------------------------------------------------------------------------------------------------------------------------------------------------------------------------------------------------------------------------------------------------------------------------------------------------------------------------------------------------------------------|
| 699 | <p>2vi7A (163)</p> <p>1s5kA (153)</p> | C | <p>15.03</p> <p>TM-align: aliSize=135 (resi) RMSD=2.82 (Å)<br/> -----TIRLERYSERHVEGLTALYNDpavarqvlqmpyosveORRKRRLHDS-DDRLLIILVALHOVDVIGSASLEOHPRIR---RSHSGSIGMVAVA--WOGKVGSRILGELLDIADnWMNLRVELTYTDNAPALALYRKFGEFETEGEMRDYavrdgrfvdvysmarlrr-----<br/> glvprgshMDIROMNKTILHWRGIRKQ---L---WPGHPD-DAHLADGEEIILQADHLASFIAMADVAIGFADASIRHDYVngcdSPVVFLF-LFVLPsFRQRGAKOLIAAVQRWGT-NKGCREMASDTSPEPTISQKVHQAALGFEETERVIFVY-----rkrcc</p> <p>SARST: aliSize=133 (resi) RMSD=3.36 (Å)<br/> t-----TIRLERYSERHVEGLTALYNDpavarqvlqmpyosveORRKRRLHDS-DDRLLIILVALHOVDVIGSASLEOHPRIRRS-HSG--SIGMVA--AWOGKVGSRILGELLDIADnWMNLRVELTYTDNAPALALYRKFGEFETEGEMR-----dyavrdgrfvdvysmarlrr<br/> -glvprgshMDIROMNKTILHWRGIRKQ---L---WPGHPD-DAHLADGEEIILQADHLASFIAMADVAIGFADASIRHDYVngcdSPVVFLF-LFVLPsFRQRGAKOLIAAVQRWGT-NKGCREMASDTSPEPTISQKVHQAALGFEETERVIFVYrkrcc-----</p> <p>BLAST: aliSize=48 (resi) iden=18.30% (28/153) simi=31.37% (48/153)<br/> tirleryserhvegltalypavraqvlqmpyqsveqr-----RRRHHSSD-DDRLLIILVALHOVDVIGSASLEOHPRIRSHSGSI-----GMGVAWOGKVGSRILGELLDIADnWMNLRVELTYTDNAPALALYRKFGEFET-----<br/> -----glvprgshMDIROMNKTILHWRGIRKQ---L---WPGHPD-DAHLADGEEIILQADHLASFIAMADVAIGFADASIRHDYVngcdSPVVFLF-LFVLPsFRQRGAKOLIAAVQRWGT-NKGCREMASDTSPEPTISQKVHQAALGFEETERVIFVYrkrcc-----</p> <p>---gmrdivavrdgrfvdvysmarlrr<br/> krcc-----</p> <p>Proposed: aliSize=137 (resi) RMSD=2.27 (Å)<br/> -----TIRLERYSERHVEGLTALYNDpavarqvlqmpyosveORRKRRLHDS-DDRLLIILVALHOVDVIGSASLEOHPRIR---RSHSGSIGMVAVA--WOGKVGSRILGELLDIADnWMNLRVELTYTDNAPALALYRKFGEFETEGEMRDYavrdgrfvdvysmarlrr<br/> glvprgshMDIROMNKTILHWRGIRKQ---L---WPGHPD-DAHLADGEEIILQADHLASFIAMADVAIGFADASIRHDYVngcdSPVVFLF-LFVLPsFRQRGAKOLIAAVQRWGT-NKGCREMASDTSPEPTISQKVHQAALGFEETERVIFVYrkrcc-----</p>                                             |
| 700 | <p>2vi7A (163)</p> <p>2fe7B (166)</p> | C | <p>20.86</p> <p>TM-align: aliSize=140 (resi) RMSD=3.08 (Å)<br/> -----TIRLERYSERHVEGLTALYNDpavarOVLO-MPYOSVEORRKRRLHSDDDRLLIILVALHOVDVIGSASLEOHPRIR--RSHSGSIGMVAVAW--OQKVGSRILGELLDIADnWMNLRVELTYTDNAPALALYRKFGEFETEGEMRDYavrdgrfvdvysmarlrr-----<br/> enlyfqghmtLEIRPAVPADAEQILAFIIE--LADYERARhEVVTDVEGIRRSFAEGSP-PTRALMCLSEGRPIGYAVFFYS-YSTWlGRNGIYLE-DLYTPeyRQVGAARLRLAREAV-ANDCGRLWSLDWQPAIDFYRSICALPQDEWVRYR-----ldgealrkmae</p> <p>SARST: aliSize=135 (resi) RMSD=3.20 (Å)<br/> t-----TIRLERYSERHVEGLTALYNDpavarOVLO-MPYOSVEORRKRRLHSDDDRLLIILVALHOVDVIGSASLEOHPRIRSHSGSIGMVAVAW--OQKVGSRILGELLDIADnWMNLRVELTYTDNAPALALYRKFGEFET-----egmrdivavrdgrfvdvysma<br/> -enlyfqghmtLEIRPAVPADAEQILAFIIE--LADYERARhEVVTDVEGIRRSFAEGSP-PTRALMCLSEGRPIGYAVFFYSYSTWlGRNGIYLE-DLYTPeyRQVGAARLRLAREAVAN-DCGRLWSLDWQPAIDFYRSICALPQDEWVRYRldgealrkmae-----</p> <p>rlrr<br/> ----</p> <p>BLAST: aliSize=32 (resi) iden=14.11% (23/163) simi=19.63% (32/163)<br/> tirleryserhvegltalypavraqvlqmpyqsveqrkrhlhdsddrllililvalhagdvigsasleqhpriirshsgsigmg-----enlyfqghmtleirpavpadaeqilafiieladyerarhevvtdegiirslfaegsptalmclsegrpigavffysystwlgngiyledlyVAWOGKVG<br/> -----SRILGELL-DIADnWMNLRVELTYTDNAPALALYRKFGEFETEGEMRDYAVRDG-----fvdvysmarlrr<br/> -----RRLRLAREAVAN-DCGRLWSLDWQPAIDFYRSICALPQDEWVRYRL-Dgealrkmae-----</p> <p>Proposed: aliSize=138 (resi) RMSD=2.29 (Å)<br/> -----TIRLERYSERHVEGLTALYNDpavarOVLO-MPYOSVEORRKRRLHSDDDRLLIILVALHOVDVIGSASLEOHPRIR--RSHSGSIGMVAVAW--OQKVGSRILGELLDIADnWMNLRVELTYTDNAPALALYRKFGEFETEG--emrdvavrdGRFVDVYS-----marlrr<br/> enlyfqghmtLEIRPAVPADAEQILAFIIE--LADYERARhEVVTDVEGIRRSFAEGSP-PTRALMCLSEGRPIGYAVFFYS-Y-STWlGRNGIYLE-DLYTPeyRQVGAARLRLAREAV-ANDCGRLWSLDWQPAIDFYRSICALPQDEW-----VRRLDGEalrkmae-----</p>                                         |
| 701 | <p>2vi7A (163)</p> <p>2g3tA (169)</p> | C | <p>11.66</p> <p>TM-align: aliSize=141 (resi) RMSD=3.26 (Å)<br/> -----TIRLERYSERHVEGLTALYND--PavarOVLO-MPYOSVEORRKRRLHSDDDRLLIILVALHO-----GDVIGSASLEOHPRIRRS-HSGSIGMVAVAW--OQKVGSRILGELLDIADnWMNLRVELTYTDNAPALALYRKFGEFETEG--MRDYavrdgrfvdvysmarlrr-----<br/> KfVIRPATAADCSDLRLIKELAKYEYMEEQVILTEKDLLEDGFGEHP-FYHCLVAEVPkehwtpegHSIVGFAMYFTYDPWIGKLLYLE-DFFVMSdyRCFTIGSEILKNISOVAM-RCRCSSMHFLAEWNEPSINFKRRASDLSseegwrlfkidkeyllkmatee</p> <p>SARST: aliSize=128 (resi) RMSD=6.19 (Å)<br/> ti--RLERYSERHVEGLTALYNDPVAROVLO-MPYOSVEORRKRRLHSDDDRLLIILVALH-----OQD-VIGSASLEOHprirrrshSGSIGMVAVAW-----OQKVGSRILGELLDIADnWMNLRVELTYTDNAPALALYRKFGEFETE-----gmrdivavrd<br/> --kfvIRPATAADCSDLRLIKELAKYEYMEEQVILTEKDLLEDGFGEHPFYHCLVAEVPkehwtpegHSIVGFAMYFTYDPWIGKLLYLE-DFFVMSdyRCFTIGSEILKNISOVAM-RCRCSSMHFLAEWNEPSINFKRRASDLSseegwrlfkidkeyllkmatee-----</p> <p>grfvdvysmarlrr<br/> -----</p> <p>BLAST: aliSize=12 (resi) iden=3.68% (6/163) simi=7.36% (12/163)<br/> tirleryserhvegltalypavraqvlqmpyqsveqrkrhlhdsddrllililvalhagdvigsasleqhpriirshsgsigmgvavawqgkvgvsgllgelladiadnwmnlrrvelt-----kfvirpataadcsdiirlikelakyeymeeqviltekdllledgfgehpfyhclvaevpkehwtpegshivg<br/> -----VTDNAPALALYRKFGEFET-----gmrdivavrdgrfvdvysmarlrr<br/> famyyftypwigkllYLEDFFVMSDYRCFTIGSEILKNISOVAM-RCRCSSMHFLAEWNEPSINFKRRASDLSseegwrlfkidkeyllkmatee-----</p> <p>Proposed: aliSize=143 (resi) RMSD=2.51 (Å)<br/> -----TIRLERYSERHVEGLTALYND-PAVAR--qvlqMPY-OSVEORRKRRLHSDDDRLLIILVALHO-----GDVIGSASLEOHpr-iR-RSHSGSIGMVAVAW--OQKVGSRILGELLDIADnWMNLRVELTYTDNAPALALYRKFGEFETEG--emrdvavrdGRFVDVYS---MA-R-LR--r<br/> KfVIRPATAADCSDLRLIKELAKYEYme---EQVILTEKDLLEDGFGEHPf--YHCLVAEVPkehwtpegHSIVGFAMYFTYDPWIGKLLYLE-DFFVMSdyRCFTIGSEILKNISOVAM-RCRCSSMHFLAEWNEPSINFKRRASDLSseegwrlfkidkeyllkmatee-----</p> |

|     |                                                     |   |       |                                                                                                                                                                                                                                                                                                                                                                                                                                                                                                                                                                                                                                                                                                                                                                                                                                                                                                                                                                                                                                                                                                                                                                                                                                                                                                                                                                                                                                                                                                                                                                                                                                                                                                                                                                                                                                                                                                                                                                                                                                                                                                                                                                                                                                                                                                                                                                                                                                                                       |
|-----|-----------------------------------------------------|---|-------|-----------------------------------------------------------------------------------------------------------------------------------------------------------------------------------------------------------------------------------------------------------------------------------------------------------------------------------------------------------------------------------------------------------------------------------------------------------------------------------------------------------------------------------------------------------------------------------------------------------------------------------------------------------------------------------------------------------------------------------------------------------------------------------------------------------------------------------------------------------------------------------------------------------------------------------------------------------------------------------------------------------------------------------------------------------------------------------------------------------------------------------------------------------------------------------------------------------------------------------------------------------------------------------------------------------------------------------------------------------------------------------------------------------------------------------------------------------------------------------------------------------------------------------------------------------------------------------------------------------------------------------------------------------------------------------------------------------------------------------------------------------------------------------------------------------------------------------------------------------------------------------------------------------------------------------------------------------------------------------------------------------------------------------------------------------------------------------------------------------------------------------------------------------------------------------------------------------------------------------------------------------------------------------------------------------------------------------------------------------------------------------------------------------------------------------------------------------------------|
| 702 | <p>2vi7A<br/>(163)</p> <hr/> <p>2vxkA<br/>(165)</p> | C | 19.02 | <p><b>TM-align:</b> aliSize=134 (resi) RMSD=2.25 (Å)<br/> entplf s p s l i s p d v l a v l p a D Y T I R P L C R S D Y K r g Y L D V L R --- V L T --- T V G D I N e c W N S R Y E W I r A R s E Y Y L L V V C D g E G R I V T G S L V V E R K F I h s L G M V g H I E - D I A V E k g Q G K K L G L R I I Q A L D Y V A E - K V G C Y K T I D C S E A N --- E G F Y I C G F K R A G L E M - A H Y ---</p> <p>lrr-<br/>---y</p> <p><b>SARST:</b> aliSize=133 (resi) RMSD=5.35 (Å)<br/> t-----I R L E R Y S E R H V E - L T A L Y N d p a V A R q v l q M P Y O S V - - - - - V E O R R K R L H D S d d R L L I L V A L H - O G D V I S A S I E O H P R I R R S H S G S - I G M G V A V - - A W G K G V G S R L L G E L D I A D n W M N L R R V E I T V Y T D n a P A L A L Y R F F E T E G e m r d y a v r d g r f v d v y S M A<br/> -entplf s p s l i s p d v l a v l p a d Y T I R P L C R S D - - - - - Y K R G Y L D V L R L I T V G D I n e e q w N S R Y E W I R A R S - - - D E Y Y L L V V C D g E G R I V T G S L V V E R K F I H S L G M V g H I E D I A V E k G Q G K K L G L R I I Q A L D Y V A E K - V G C Y K T I D C S E - - - A N E G F Y I C G F K R A G - - - - - L E M A</p> <p>R L - r r<br/>H y - -</p> <p><b>BLAST:</b> aliSize=43 (resi) iden=15.95% (26/163) simi=26.38% (43/163)<br/> t i r l e r y s e r h v e g l t a l y n d p a v a r q v l q m p y s v e q r r k r l h d s d - - - - - D R L I L V A L H O G D V I S A S I E O H P R I r r S H S - S I G M G V A V A W G K G V G S R L L G E L L D I A D N W M N L R R V E I T V Y T<br/> -----entplf s p s l i s p d v l a v l p a d y t i r p l c r s d y k r g y l d v l r v l t t v g d i n e e q w n s r y e w i r a r s E Y Y L V V C D G E G R I V T G S L V V E R K F - - I H S L G M V G H I E D I A V E K G Q G K K L G L R I I Q A L D Y V A E K V G C Y K T I L D</p> <p>D N A P A L A L Y R F F E T E G - E M R D Y - a v r d g r f v d v y s m a r l r r<br/> C S E A N E G F Y I C G F K R A G I E M A H Y - - - - -</p> <p><b>Proposed:</b> aliSize=134 (resi) RMSD=1.85 (Å)<br/> entplf s p s l i s p d v l a v l p a D Y T I R P L C R S D Y K r g Y L D V L R --- V L T --- T V G D I N e c W N S R Y E W I r A R s E Y Y L L V V C D g E G R I V T G S L V V E R K F I h s L G M V g H I E - D I A V E k g Q G K K L G L R I I Q A L D Y V A E - K V G C Y K T I D C S E A N - - - E G F Y I C G F K R A G - - - - - L E M A H Y</p> <p>R - l r r<br/>Y c - -</p> |
| 703 | <p>5croA<br/>(61)</p> <hr/> <p>1d1mB<br/>(65)</p>   | C | 91.80 | <p><b>TM-align:</b> aliSize=59 (resi) RMSD=1.51 (Å)<br/> M E Q R I T L K D Y A M R F G Q T K T A K D L G V Y Q S A I N K A I H A G R K I F L T I N A D G S V Y A E E V K P F P S n - - - - -<br/> M E Q R I T L K D Y A M R F G Q T K T A K D L G V Y Q S A I N K A I H A G R K I F L T I N A D G S V Y A E E V K D G E - - v k p w p s</p> <p><b>SARST:</b> aliSize=55 (resi) RMSD=0.75 (Å)<br/> m - E Q R I T L K D Y A M R F G Q T K T A K D L G V Y Q S A I N K A I H A G R K I F L T I N A D G S V Y A E E V K - - - - - p f p s<br/> - m E Q R I T L K D Y A M R F G Q T K T A K D L G V Y Q S A I N K A I H A G R K I F L T I N A D G S V Y A E E V K d g e v k p w p s - - - -</p> <p><b>BLAST:</b> aliSize=60 (resi) iden=98.33% (59/61) simi=100.00% (60/61)<br/> M E Q R I T L K D Y A M R F G Q T K T A K D L G V Y Q S A I N K A I H A G R K I F L T I N A D G S V Y A E E - - - - - E V K P F P S<br/> M E Q R I T L K D Y A M R F G Q T K T A K D L G V Y Q S A I N K A I H A G R K I F L T I N A D G S V Y A E E v k d g e v k p w p s</p> <p><b>Proposed:</b> aliSize=61 (resi) RMSD=0.93 (Å)<br/> M E Q R I T L K D Y A M R F G Q T K T A K D L G V Y Q S A I N K A I H A G R K I F L T I N A D G S V Y A E E V K - - - - P F P S N<br/> M E Q R I T L K D Y A M R F G Q T K T A K D L G V Y Q S A I N K A I H A G R K I F L T I N A D G S V Y A E E V K d g e v k p w p s</p>                                                                                                                                                                                                                                                                                                                                                                                                                                                                                                                                                                                                                                                                                                                                                                                                                                                                                                                                                                                                                                                                      |
| 704 | <p>5croA<br/>(61)</p> <hr/> <p>2cw1A<br/>(65)</p>   | C | 19.67 | <p><b>TM-align:</b> aliSize=52 (resi) RMSD=2.21 (Å)<br/> m e q - - R I T - L L D Y A M R F G Q T K T A K D - L g V Y S A I N K A I H A G R K I F L T I N A D G S V Y A E E V K p f p s n - - - - -<br/> - - - m r K K L d L K K F V E D K N E Y A A R A I G - L S K L I E E V L K R L P V Y V E T N K D N I K V Y I T Q d g i t q p f p p</p> <p><b>SARST:</b> aliSize=54 (resi) RMSD=2.48 (Å)<br/> m e - - Q R I T L K D Y A M R F G Q T K T A K D L G V Y Q S A I N K A I H A G R K I F L T I N A D G S V Y A E E V K - - - - - p f p s<br/> - - m r K K L d L K K F V E D K N E Y A A R A L G L S K L I E E V L K R L P V Y V E T N K D N I K V Y I T Q d g i t q p f p p - - - -</p> <p><b>BLAST:</b> aliSize=32 (resi) iden=30.00% (18/61) simi=53.33% (32/61)<br/> M E Q R I T L K D Y A M R F G Q T K T A K D L G V Y Q S A I N K A I H A G R K I F L T I N A D G S - - - V A E E - - - V K P F P - s<br/> M R K K L d L K K F V E D K N E Y A A R A L G L S K L I E E V L K R L P V Y V E T N K D N I k v y I T Q d g i T Q P F P p -</p> <p><b>Proposed:</b> aliSize=58 (resi) RMSD=2.03 (Å)<br/> m e q - - R I T - L L D Y A M R F G Q T K T A K D L G V Y Q S A I N K A I H A G R K I F L T I N A D G S V Y A E E - - - - V K P F P S N<br/> - - - m r K K L d L K K F V E D K N E Y A A R A L G L S K L I E E V L K R L P V Y V E T N K D N I K V Y I T q d g i T Q P F P P</p>                                                                                                                                                                                                                                                                                                                                                                                                                                                                                                                                                                                                                                                                                                                                                                                                                                                                                                                                                                                                                                                                           |

|     |                                                     |   |       |                                                                                                                                                                                                                                                                                                                                                                                                                                                                                                                                                                                                                                                                                                                                                                                                                                                                                                                                                                                                                                                                                                                                                                                                                                                                                                                                                                                                                                                                                                                                                                                                                                                                                                                                       |
|-----|-----------------------------------------------------|---|-------|---------------------------------------------------------------------------------------------------------------------------------------------------------------------------------------------------------------------------------------------------------------------------------------------------------------------------------------------------------------------------------------------------------------------------------------------------------------------------------------------------------------------------------------------------------------------------------------------------------------------------------------------------------------------------------------------------------------------------------------------------------------------------------------------------------------------------------------------------------------------------------------------------------------------------------------------------------------------------------------------------------------------------------------------------------------------------------------------------------------------------------------------------------------------------------------------------------------------------------------------------------------------------------------------------------------------------------------------------------------------------------------------------------------------------------------------------------------------------------------------------------------------------------------------------------------------------------------------------------------------------------------------------------------------------------------------------------------------------------------|
| 705 | <p>5croA<br/>(61)</p> <hr/> <p>2orcA<br/>(71)</p>   | C | 93.44 | <p><b>TM-align:</b> aliSize=58 (resi) RMSD=1.68 (Å)<br/> MEQRI TLKDYAMRFGQTKTAKDLGVYQSA INKA IHAGRK IFLT INADGSVYAEV VKPFpsn-----<br/> MEQRI TLKDYAMRFGQTKTAKDLGVYQSA INKA IHAGRK IFLT INADGSVYAEV VKDG---ev kpfpsnkktta</p> <p><b>SARST:</b> aliSize=50 (resi) RMSD=1.19 (Å)<br/> meqri-----TLKDYAMRFGQTKTAKDLGVYQSA INKA IHAGRK IFLT INADGSVYAEV-----kpfps<br/> -----meqri TLKDYAMRFGQTKTAKDLGVYQSA INKA IHAGRK IFLT INADGSVYAEV VKdgev kpfpsnkktta-----</p> <p><b>BLAST:</b> aliSize=60 (resi) iden=100.00% (60/61) simi=100.00% (60/61)<br/> MEQRI TLKDYAMRFGQTKTAKDLGVYQSA INKA IHAGRK IFLT INADGSVYAEV VK-----PFPS-----<br/> MEQRI TLKDYAMRFGQTKTAKDLGVYQSA INKA IHAGRK IFLT INADGSVYAEV VKdgev kPFPSnkktta</p> <p><b>Proposed:</b> aliSize=61 (resi) RMSD=1.49 (Å)<br/> MEQRI TLKDYAMRFGQTKTAKDLGVYQSA INKA IHAGRK IFLT INADGSVYAEV-----KPFPSN-----<br/> MEQRI TLKDYAMRFGQTKTAKDLGVYQSA INKA IHAGRK IFLT INADGSVYAEV VKdgev kPFPSNKktta</p>                                                                                                                                                                                                                                                                                                                                                                                                                                                                                                                                                                                                                                                                                                                                                                                    |
| 706 | <p>lgheA<br/>(170)</p> <hr/> <p>lqsmD<br/>(152)</p> | C | 13.16 | <p><b>TM-align:</b> aliSize=135 (resi) RMSD=2.63 (Å)<br/> -----AQLRRVtaeSFaHYRHGLAOLLFETVHGgASvgFadLDQqAYAWCDGLKADT-A-AGSLLWVA---EDdNVLASAOLSLCOKP-NGLNRAEVOKI-VLPSARGRLGROL-DEVEOVVHKRGLLHLDTEAGS-VAEAFYSALaYTRV-GEIPGycatpdgrlhptaiyfktl---<br/> sedniTVRFV---TE-NDKEWQRLWKSQD-FYE--V--SF-P-DDLDLDFNFGRFIDpNIKMWAAVAVessSE-KIIGMINFNHMTTWDFKDKIYINDLYDENSRVKGAGKLIQFYDEADLGTSPVYWCIDESHRAQLLYVKV-GYKAPKIYKR-----kgy</p> <p><b>SARST:</b> aliSize=133 (resi) RMSD=4.63 (Å)<br/> a-----AQLRRVtaeSFaHYRHGLAOLLFETVHGgASvgFadLDQqAYAWCDGLKADT-A-AGSLLWVA---DDNVLASAOLSLCOKP-NGLNRAEV--OKI-VLPSARGRLGROL-DEVEOVVHKRGLLHLDTEAGSVAEAFYSALaytrVCELPG-----ycatpdgrlhptaiyfktl<br/> -sedniTVRFV---TE-NDKEWQRLWKSQD-FYE--V--SF-P-DDLDLDFNFGRFIDpNIKMWAAVAVessSEKIIGMINFNHMTTWDFKDKIYINDLYDENSRVKGAGKLIQFYDEADLGTSPVYWCIDESHRAQLLYVKV---VYKAPKIYKR-----kgy</p> <p><b>BLAST:</b> aliSize=5 (resi) iden=3.29% (5/152) simi=3.29% (5/152)<br/> aqlrrvtaesfahyrhglqallfetvhggasvgfadldqqayawcdglkadiaagsllwvvaeddnvlasaqlslcqqknglnra-----<br/> -----sednitrvtendkegwqrlwksyqdfyevsfpddlddfnfgfldpnikmwaavavesssekiigminfnhmttwdfdkkiyindlydensrvkgaggkl</p> <p>-----VOKI-VLPS-----argrglgrqldeveqvavkhkrghlhdteagsvaeafysalaytrvgeIPGycatpdgrlhptaiyfktl<br/> iqfvydEADKLGTPsvywcidesnhraqllvkvgykaKIYKR-----</p> <p><b>Proposed:</b> aliSize=137 (resi) RMSD=2.04 (Å)<br/> -----AQLRRVtaeSFaHYRHGLAOLLFETVHGgASvgFadLDQqAYAWCDGLKADT-A-AGSLLWVA---DdNVLASAOLSLCqKpNg---LNRAEVOKI-VLPSARGRLGROL-DEVEOVVHKRGLLHLDTEAGS-VAEAFYSALaYTRVgELPGyCATPdG-rlhptaiyfktla<br/> sedniTVRFV---TE-NDKEWQRLWKSQD-F-Y--EV--Sf---P-DDLDLDFNFGRFIDpNIKMWAAVAVessSE-KIIGMINFNH-M--TtwdfKDKIYINDLYDENSRVKGAGKLIQFYDEADLGTSPVYWCIDESHRAQLLYVKV---VYKAPKIYKR-----kgy</p> |
| 707 | <p>lk53A<br/>(72)</p> <hr/> <p>2hj1A<br/>(77)</p>   | C | 8.33  | <p><b>TM-align:</b> aliSize=49 (resi) RMSD=2.39 (Å)<br/> mhhhhhhamEEVTKANLIaNAStQTAEfKGTf-EKaT-SEYA--YADTLKkdNGE---WTVDVADKgytlnikfag-----<br/> -----nQINIEIAYA--PERYYLKSfQVDEgIT-VQT-ITqSGILSQFP-EIDlstNKIGIFSR-----pikltdvlkegdrieiyrpll</p> <p><b>SARST:</b> aliSize=60 (resi) RMSD=9.10 (Å)<br/> mhhhhhhamEEVTKANLIaNAStQTAEfKGTf-EKaT-SEYA--YADTLKkdNGE---WTVDVADKgytlnikfag-----<br/> -----nQINIEIAYA--PERYYLKSfQVdegIT-VQT-ITQSGILSQFP-EIDlstNKIGIFSRpikltdvlkegdrieiyrpll--</p> <p><b>BLAST:</b> aliSize=9 (resi) iden=6.94% (5/72) simi=12.50% (9/72)<br/> mhhhhhhamEEVTKANLIaNAStQTAEfKGTfEkatse-----AYAYADTLKkdNGEWTVD-----vADKgytlnikfag<br/> -----nqinieiaYAFPERYYLKS--fQVdegitvqtaitqsgilsqfpeidlstnkigifsrpikltdvlkegdrieiyrpll-----</p> <p><b>Proposed:</b> aliSize=60 (resi) RMSD=2.36 (Å)<br/> mhhhhhhamEEVTKANLIaNAStQTAEfKGTfEkatse-----AYAYADTLKkdNGE---WTVDVAD-----KGY-TLNIFKfag-<br/> -----nQINIEIAYA--PERYYLKSfQVDEgIT-VQT-ITqSGILSQFP-EIDlstNKIGIFSRpikltdvlkegdrieiyrpll</p>                                                                                                                                                                                                                                                                                                                                                                                                                                                                                                                                                                                                                                                                                                                                |

|     |                                                     |                 |                                                                                                                                                                                                                                                                                                                                                                                                                                                                                                                                                                                                                                                                                                                                                                                                                                                                                                                                                                                                                                                                                                                                                                                                                                                                                                                                                                            |
|-----|-----------------------------------------------------|-----------------|----------------------------------------------------------------------------------------------------------------------------------------------------------------------------------------------------------------------------------------------------------------------------------------------------------------------------------------------------------------------------------------------------------------------------------------------------------------------------------------------------------------------------------------------------------------------------------------------------------------------------------------------------------------------------------------------------------------------------------------------------------------------------------------------------------------------------------------------------------------------------------------------------------------------------------------------------------------------------------------------------------------------------------------------------------------------------------------------------------------------------------------------------------------------------------------------------------------------------------------------------------------------------------------------------------------------------------------------------------------------------|
| 708 | <p>2c5jA<br/>(82)</p> <hr/> <p>1mi7R<br/>(103)</p>  | N<br><br>3.66   | <p><b>TM-align:</b> aliSize=56 (resi)      RMSD=2.53 (Å)<br/> dpfqvkvkdtkeqln-----RInn--Yitrhntae--EEIQDILKDVEETIVDLDRSIVVMKRDENEDVSGREAQVKNIKQQLDALKIRF--D-----<br/> -----qqspysaamaeqrhqewlrfvdl1knayqnd1hlp--1IN-----1mLTPDEREALGTRVRIVEELLRGEISQRELKNELGAGIATITRGSNSLKAA-PVe1Rqwleev11</p> <p><b>SARST:</b> aliSize=80 (resi)      RMSD=9.26 (Å)<br/> d-----PFQVVKDTKEQLNRIN---NYITRHNTAEEETQDIKDVVEETIVDLDRSIVVMKRDENEDVSGREAQVKNIKQQL---DALKLRF----d<br/> -qqspysaamaeQRHQEWLRFVDLKNAYqnd1hlp1n1m1--TPDEREALGTRVRIVEELLRGEISQRELKNELGAGIATITRGSNSLKaaPvELRQWLEEv11-</p> <p><b>BLAST:</b> aliSize=19 (resi)      iden=10.98% (9/82)      simi=23.17% (19/82)<br/> dpfqvkvkdtkeqlnrinnyitrhntaeeeiq-----DILKDVVEETIVDLDRSIVVMKRDENEDVSGREAQVKNIKQQL-----kqqldalklrfd<br/> -----qqspysaamaeqrhqewlrfvdl1knayqnd1hlp1n1m1--TPDEREALGTRVRIVEELLRGEISQRELKNELGAGIATITRGSNSLKaaPvELRQWLEEv11-----</p> <p><b>Proposed:</b> aliSize=77 (resi)      RMSD=1.64 (Å)<br/> --DPFQVVKDTKEQLNRINNYITRHNTA-----eeEQDILKDVVEETIVDLDRSIVVMKRDENEDVSGREAQVKNIKQQLDALKL-rfD-----<br/> qqSPYSAAMAEQRHQEWLRFVDLKNAYQnd1hlp1n1m1--TPDEREALGTRVRIVEELLRGEISQRELKNELGAGIATITRGSNSLKAAp--Ve1Rqwleev11</p>                                                                                                                                                                                       |
| 709 | <p>1pucA<br/>(101)</p> <hr/> <p>1qb3A<br/>(113)</p> | C<br><br>71.29  | <p><b>TM-align:</b> aliSize=86 (resi)      RMSD=1.91 (Å)<br/> sksgv---PRLTASERERLEPFIIDQIHYSPRYADDEYRHYVMLPKAMLKAIPTDYFNPEITGTLRIIQEEWRGLGITQSLGWEMVEHVpephi-----LLFkrekd-----<br/> -----hafqgKLTDOERARVLEFQDSIHYSPRYSDNYEYRHYVMLPKAMLKVIPSDFNSSEVGTLRILITDEWRGLGITQSLGWEHTECHapephiLLF-----krplnyeaelraataaaq</p> <p><b>SARST:</b> aliSize=96 (resi)      RMSD=5.89 (Å)<br/> sksgv---PRLTASERERLEPFIIDQIHYSPRYADDEYRHYVMLPKAMLKAIPTDYFNPEITGTLRIIQEEWRGLGITQSLGWEMVEHVPEPHILLFKRE-----kd<br/> ---hafqgKLTDOERARVLEFQDSIHYSPRYSDNYEYRHYVMLPKAMLKVIPSDFNSSEVGTLRILITDEWRGLGITQSLGWEHTECHAPEPHILLFKRPlnyeaelraataaaq---</p> <p><b>BLAST:</b> aliSize=76 (resi)      iden=71.29% (72/101)      simi=75.25% (76/101)<br/> sksgvp-----PRLTASERERLEPFIIDQIHYSPRYADDEYRHYVMLPKAMLKAIPTDYFNPEITGTLRIIQEEWRGLGITQSLGWEMVEHVPEPHILLFKR-----ekd<br/> -----hafqgKLTDOERARVLEFQDSIHYSPRYSDNYEYRHYVMLPKAMLKVIPSDFNSSEVGTLRILITDEWRGLGITQSLGWEHTECHAPEPHILLFKRPlnyeaelraataaaq---</p> <p><b>Proposed:</b> aliSize=96 (resi)      RMSD=0.73 (Å)<br/> sksgv---PRLTASERERLEPFIIDQIHYSPRYADDEYRHYVMLPKAMLKAIPTDYFNPEITGTLRIIQEEWRGLGITQSLGWEMVEHVPEPHILLFKREKD-----<br/> -----hafqgKLTDOERARVLEFQDSIHYSPRYSDNYEYRHYVMLPKAMLKVIPSDFNSSEVGTLRILITDEWRGLGITQSLGWEHTECHAPEPHILLFKRPlnyeaelraataaaq</p>                                                                                            |
| 710 | <p>3bcoA<br/>(124)</p> <hr/> <p>3bcmA<br/>(119)</p> | N<br><br>100.00 | <p><b>TM-align:</b> aliSize=103 (resi)      RMSD=0.35 (Å)<br/> kesaaakferqhmdsgnsass-----SSNYCNQMMCCRKMTQGKCKPVNTFVHESLADVKAVCSQKKVTCKDGQTNQYQSKSTMRTDCRETGSSKYPNCAKYTTQVEKHIIVACGGKPSVPVHFDASV<br/> -----kesaaakferqhmdsgnsSSNYCNQMMCCRKMTQGKCKPVNTFVHESLADVKAVCSQKKVTCKDGQTNQYQSKSTMRTDCRETGSSKYPNCAKYTTQVEKHIIVACGGKPSVPVHFDASV</p> <p><b>SARST:</b> aliSize=117 (resi)      RMSD=9.47 (Å)<br/> k-ESAAAKFERQHMDSGnsassSSNYCNQMMCCRKMTQGKCKPVNTFVHESLADVKAVCSQKKVTCKDGQTNQYQSKSTMRTDCRETGSSKYPNCAKYTTQVEKHIIVACGGKPSVPVHFDAS-v<br/> -kESAAAKFERQHMDSGS-----SSNYCNQMMCCRKMTQGKCKPVNTFVHESLADVKAVCSQKKVTCKDGQTNQYQSKSTMRTDCRETGSSKYPNCAKYTTQVEKHIIVACGGKPSVPVHFDASv-</p> <p><b>BLAST:</b> aliSize=119 (resi)      iden=100.00% (119/119)      simi=100.00% (119/119)<br/> KESAAAKFERQHMDSGnsassSSNYCNQMMCCRKMTQGKCKPVNTFVHESLADVKAVCSQKKVTCKDGQTNQYQSKSTMRTDCRETGSSKYPNCAKYTTQVEKHIIVACGGKPSVPVHFDASV<br/> KESAAAKFERQHMDSG-----SSNYCNQMMCCRKMTQGKCKPVNTFVHESLADVKAVCSQKKVTCKDGQTNQYQSKSTMRTDCRETGSSKYPNCAKYTTQVEKHIIVACGGKPSVPVHFDASV</p> <p><b>Proposed:</b> aliSize=119 (resi)      RMSD=0.33 (Å)<br/> KESAAAKFERQHMDSGnsassSSNYCNQMMCCRKMTQGKCKPVNTFVHESLADVKAVCSQKKVTCKDGQTNQYQSKSTMRTDCRETGSSKYPNCAKYTTQVEKHIIVACGGKPSVPVHFDASV<br/> KESAAAKFERQHMDSG-----SSNYCNQMMCCRKMTQGKCKPVNTFVHESLADVKAVCSQKKVTCKDGQTNQYQSKSTMRTDCRETGSSKYPNCAKYTTQVEKHIIVACGGKPSVPVHFDASV</p> |

|     |                                                     |   |       |                                                                                                                                                                                                                                                                                                                                                                                                                                                                                                                                                                                                                                                                                                                                                                                                                                                                                                                                                                                                                                                                                                                                                                                                                                                                                                                                                                                                |
|-----|-----------------------------------------------------|---|-------|------------------------------------------------------------------------------------------------------------------------------------------------------------------------------------------------------------------------------------------------------------------------------------------------------------------------------------------------------------------------------------------------------------------------------------------------------------------------------------------------------------------------------------------------------------------------------------------------------------------------------------------------------------------------------------------------------------------------------------------------------------------------------------------------------------------------------------------------------------------------------------------------------------------------------------------------------------------------------------------------------------------------------------------------------------------------------------------------------------------------------------------------------------------------------------------------------------------------------------------------------------------------------------------------------------------------------------------------------------------------------------------------|
| 711 | <p>3bcoA<br/>(124)</p> <hr/> <p>ljs0A<br/>(124)</p> | N | 74.19 | <p><b>TM-align:</b> aliSize=95 (resi) RMSD=1.56 (Å)<br/> kesaaakferqhmdsgnsas-----SSSNYCNQMMCCRKMTQGKCKPVNTFVHESLADVKAVCSQKKVTCKDGTNCYQSKSTMRIIDCRETGSSSKYPNCAYKTTQVEKHIIVACGGKPSVPVHFDASV-----<br/> -----ketaakferqhmdsstsaSSSNYCNQMMKSRNLTCKDRCKPVNTFVHESLADVQAVCSQKNVACKNGOTNCYQSYSTMSIIDCRETGSSSKYPNCAYKTTQANKHIIIVACEGNYVPVHFDASV-----</p> <p><b>SARST:</b> aliSize=118 (resi) RMSD=11.07 (Å)<br/> k-ESAAAKFERQHMDsgnsASSS-----SNYCNQMMCCRKMTQGKCKPVNTFVHESLADVKAVCSQKKVTCKDGTNCYQSKSTMRIIDCRETGSSSKYPNCAYKTTQVEKHIIVACGGKPSVPVHFDASV-v<br/> -kETAAAKFERQHMD----SSTSaassSNYCNQMMKSRNLTCKDRCKPVNTFVHESLADVQAVCSQKNVACKNGOTNCYQSYSTMSIIDCRETGSSSKYPNCAYKTTQANKHIIIVACEGNYVPVHFDASV-v</p> <p><b>BLAST:</b> aliSize=109 (resi) iden=82.26% (102/124) simi=87.90% (109/124)<br/> KESAAAKFERQHMDSGNSASSSNYCNQMMCCRKMTQGKCKPVNTFVHESLADVKAVCSQKKVTCKDGTNCYQSKSTMRIIDCRETGSSSKYPNCAYKTTQVEKHIIVACGGKPSVPVHFDASV<br/> KETAAAKFERQHMDSSTSAASSSNYCNQMMKSRNLTCKDRCKPVNTFVHESLADVQAVCSQKNVACKNGOTNCYQSYSTMSIIDCRETGSSSKYPNCAYKTTQANKHIIIVACEGNYVPVHFDASV</p> <p><b>Proposed:</b> aliSize=113 (resi) RMSD=0.93 (Å)<br/> KESAAAKFERQHMDSGNSASSSNYCNQMMCCRKMTQGKCKPVNTFVHESLADVKAVCSQKKVTCKDGTNCYQSKSTMRIIDCRETGSSSKYPNCAYKTTQVEKHIIVACGGK-----psvpvhfdasv<br/> KETAAAKFERQHMDSSTSAASSSNYCNQMMKSRNLTCKDRCKPVNTFVHESLADVQAVCSQKNVACKNGOTNCYQSYSTMSIIDCRETGSSSKYPNCAYKTTQANKHIIIVACEGNYpyvpvhfdasv-----</p> |
| 712 | <p>3bcoA<br/>(124)</p> <hr/> <p>ljs0A<br/>(124)</p> | C | 69.35 | <p><b>TM-align:</b> aliSize=95 (resi) RMSD=1.56 (Å)<br/> kesaaakferqhmdsgnsas-----SSSNYCNQMMCCRKMTQGKCKPVNTFVHESLADVKAVCSQKKVTCKDGTNCYQSKSTMRIIDCRETGSSSKYPNCAYKTTQVEKHIIVACGGKPSVPVHFDASV-----<br/> -----ketaakferqhmdsstsaSSSNYCNQMMKSRNLTCKDRCKPVNTFVHESLADVQAVCSQKNVACKNGOTNCYQSYSTMSIIDCRETGSSSKYPNCAYKTTQANKHIIIVACEGNYVPVHFDASV-----</p> <p><b>SARST:</b> aliSize=118 (resi) RMSD=11.07 (Å)<br/> k-ESAAAKFERQHMDsgnsASSS-----SNYCNQMMCCRKMTQGKCKPVNTFVHESLADVKAVCSQKKVTCKDGTNCYQSKSTMRIIDCRETGSSSKYPNCAYKTTQVEKHIIVACGGKPSVPVHFDASV-v<br/> -kETAAAKFERQHMD----SSTSaassSNYCNQMMKSRNLTCKDRCKPVNTFVHESLADVQAVCSQKNVACKNGOTNCYQSYSTMSIIDCRETGSSSKYPNCAYKTTQANKHIIIVACEGNYVPVHFDASV-v</p> <p><b>BLAST:</b> aliSize=109 (resi) iden=82.26% (102/124) simi=87.90% (109/124)<br/> KESAAAKFERQHMDSGNSASSSNYCNQMMCCRKMTQGKCKPVNTFVHESLADVKAVCSQKKVTCKDGTNCYQSKSTMRIIDCRETGSSSKYPNCAYKTTQVEKHIIVACGGKPSVPVHFDASV<br/> KETAAAKFERQHMDSSTSAASSSNYCNQMMKSRNLTCKDRCKPVNTFVHESLADVQAVCSQKNVACKNGOTNCYQSYSTMSIIDCRETGSSSKYPNCAYKTTQANKHIIIVACEGNYVPVHFDASV</p> <p><b>Proposed:</b> aliSize=104 (resi) RMSD=0.83 (Å)<br/> kesaaakferqhmdsgnsas-----SSSNYCNQMMCCRKMTQGKCKPVNTFVHESLADVKAVCSQKKVTCKDGTNCYQSKSTMRIIDCRETGSSSKYPNCAYKTTQVEKHIIVACGGKPSVPVHFDASV<br/> -----ketaakferqhmdsstsaSSSNYCNQMMKSRNLTCKDRCKPVNTFVHESLADVQAVCSQKNVACKNGOTNCYQSYSTMSIIDCRETGSSSKYPNCAYKTTQANKHIIIVACEGNYVPVHFDASV</p>    |
| 713 | <p>3bcoA<br/>(124)</p> <hr/> <p>lr3mB<br/>(122)</p> | N | 96.72 | <p><b>TM-align:</b> aliSize=104 (resi) RMSD=0.99 (Å)<br/> kesaaakferqhmdsgnsas-----SSSNYCNQMMCCRKMTQGKCKPVNTFVHESLADVKAVCSQKKVTCKDGTNCYQSKSTMRIIDCRETGSSSKYPNCAYKTTQVEKHIIVACGGKPSVPVHFDASV<br/> -----kesaaakferqhmdsgnsPSNYCNLMCCRKMTQGKCKPVNTFVHESLADVKAVCSQKKVTCKNGOTNCYQSKSTMRIIDCRETGSSSKYPNCAYKTTQVEKHIIVACGGKPSVPVHFDASV</p> <p><b>SARST:</b> aliSize=120 (resi) RMSD=9.52 (Å)<br/> k-ESAAAKFERQHMDSGNSASSSNYCNQMMCCRKMTQGKCKPVNTFVHESLADVKAVCSQKKVTCKDGTNCYQSKSTMRIIDCRETGSSSKYPNCAYKTTQVEKHIIVACGGKPSVPVHFDASV-v<br/> -kESAAAKFERQHMDSG--NSPSSNYCNLMCCRKMTQGKCKPVNTFVHESLADVKAVCSQKKVTCKNGOTNCYQSKSTMRIIDCRETGSSSKYPNCAYKTTQVEKHIIVACGGKPSVPVHFDASV-v</p> <p><b>BLAST:</b> aliSize=120 (resi) iden=97.54% (119/122) simi=98.36% (120/122)<br/> KESAAAKFERQHMDSGNSASSSNYCNQMMCCRKMTQGKCKPVNTFVHESLADVKAVCSQKKVTCKDGTNCYQSKSTMRIIDCRETGSSSKYPNCAYKTTQVEKHIIVACGGKPSVPVHFDASV<br/> KESAAAKFERQHMDSGNSPSS--NYCNLMCCRKMTQGKCKPVNTFVHESLADVKAVCSQKKVTCKNGOTNCYQSKSTMRIIDCRETGSSSKYPNCAYKTTQVEKHIIVACGGKPSVPVHFDASV</p> <p><b>Proposed:</b> aliSize=122 (resi) RMSD=0.55 (Å)<br/> KESAAAKFERQHMDSGNSASSSNYCNQMMCCRKMTQGKCKPVNTFVHESLADVKAVCSQKKVTCKDGTNCYQSKSTMRIIDCRETGSSSKYPNCAYKTTQVEKHIIVACGGKPSVPVHFDASV<br/> KESAAAKFERQHMDSGN-SP-SSNYCNLMCCRKMTQGKCKPVNTFVHESLADVKAVCSQKKVTCKNGOTNCYQSKSTMRIIDCRETGSSSKYPNCAYKTTQVEKHIIVACGGKPSVPVHFDASV</p>                                          |

|     |                                                     |   |       |                                                                                                                                                                                                                                                                                                                                                                                                                                                                                                                                                                                                                                                                                                                                                                                                                                                                                                                                                                                                                                                                                                                                                                                                                                                                                                                                          |
|-----|-----------------------------------------------------|---|-------|------------------------------------------------------------------------------------------------------------------------------------------------------------------------------------------------------------------------------------------------------------------------------------------------------------------------------------------------------------------------------------------------------------------------------------------------------------------------------------------------------------------------------------------------------------------------------------------------------------------------------------------------------------------------------------------------------------------------------------------------------------------------------------------------------------------------------------------------------------------------------------------------------------------------------------------------------------------------------------------------------------------------------------------------------------------------------------------------------------------------------------------------------------------------------------------------------------------------------------------------------------------------------------------------------------------------------------------|
| 714 | <p>3bcoA<br/>(124)</p> <hr/> <p>1a2wA<br/>(124)</p> | N | 82.26 | <p>TM-align: aliSize=104 (resi) RMSD=0.72 (Å)<br/> kesaaakferqhmdsgnsas-----SSSNYCNQMMCCRKMTQGKCKPVNTFVHESLADVKAVCSQKKVTCKDGTNICYQSKSTMRIIDCRETGSSKYPNCAYKTTQVEKHIIVACGGKPSVPVHFDASV<br/> -----ketaaakferqhmdsstaaSSSNYCNQMMKSRNLIKDRCKPVNTFVHESLADVQAVCSQKNVACKNGOTNICYQSYSTMSITDCRETGSSKYPNCAYKTTQANKHIIVACEINPYVPVHFDASV</p> <p>SARST: aliSize=120 (resi) RMSD=12.05 (Å)<br/> k-ESAAAKFERQHMDsgNSASSS--SNYCNQMMCCRKMTQGKCKPVNTFVHESLADVKAVCSQKKVTCKDGTNICYQSKSTMRIIDCRETGSSKYPNCAYKTTQVEKHIIVACGGKPSVPVHFDASV--v<br/> -kETAAAKFERQHMD--SSTSAASSSNYCNQMMKSRNLIKDRCKPVNTFVHESLADVQAVCSQKNVACKNGOTNICYQSYSTMSITDCRETGSSKYPNCAYKTTQANKHIIVACEINPYVPVHFDASVv-</p> <p>BLAST: aliSize=109 (resi) iden=82.26% (102/124) simi=87.90% (109/124)<br/> KESAAAKFERQHMDSGNSASSSNYCNQMMCCRKMTQGKCKPVNTFVHESLADVKAVCSQKKVTCKDGTNICYQSKSTMRIIDCRETGSSKYPNCAYKTTQVEKHIIVACGGKPSVPVHFDASV<br/> KETAAAKFERQHMDSSTSAASSSNYCNQMMKSRNLIKDRCKPVNTFVHESLADVQAVCSQKNVACKNGOTNICYQSYSTMSITDCRETGSSKYPNCAYKTTQANKHIIVACEINPYVPVHFDASV</p> <p>Proposed: aliSize=124 (resi) RMSD=1.01 (Å)<br/> KESAAAKFERQHMDSGNSASSSNYCNQMMCCRKMTQGKCKPVNTFVHESLADVKAVCSQKKVTCKDGTNICYQSKSTMRIIDCRETGSSKYPNCAYKTTQVEKHIIVACGGKPSVPVHFDASV<br/> KETAAAKFERQHMDSSTSAASSSNYCNQMMKSRNLIKDRCKPVNTFVHESLADVQAVCSQKNVACKNGOTNICYQSYSTMSITDCRETGSSKYPNCAYKTTQANKHIIVACEINPYVPVHFDASV</p>   |
| 715 | <p>3bcoA<br/>(124)</p> <hr/> <p>1h8xA<br/>(125)</p> | N | 74.19 | <p>TM-align: aliSize=104 (resi) RMSD=1.40 (Å)<br/> kesaaakferqhmdsgnsas-----SSSNYCNQMMCCRKMTQGKCKPVNTFVHESLADVKAVCSQKKVTCKDGTNICYQSKSTMRIIDCRETGSSKYPNCAYKTTQVEKHIIVACGGKPSVPVHFDASV--v<br/> -----kesaaakferqhmdsgnspSSSYCNQMMRRRNMTQGRCKPVNTFVHEPLVDVQNVCFQEKVTCKNGGNCYKSNSSMHIIDCRLINGSRYPNCAYRTSOKERHIIVACEINPYVPVHFDASVve</p> <p>SARST: aliSize=120 (resi) RMSD=11.51 (Å)<br/> k-ESAAAKFERQHMD--SGNSASSSNYCNQMMCCRKMTQGKCKPVNTFVHESLADVKAVCSQKKVTCKDGTNICYQSKSTMRIIDCRETGSSKYPNCAYKTTQVEKHIIVACGGKPSVPVHFDASV--v<br/> -kESAAAKFERQHMDsgNSPSSSYCNQMMRRRNMTQGRCKPVNTFVHEPLVDVQNVCFQEKVTCKNGGNCYKSNSSMHIIDCRLINGSRYPNCAYRTSOKERHIIVACEINPYVPVHFDASVve-</p> <p>BLAST: aliSize=105 (resi) iden=76.61% (95/124) simi=84.68% (105/124)<br/> KESAAAKFERQHMDSGNSASSSNYCNQMMCCRKMTQGKCKPVNTFVHESLADVKAVCSQKKVTCKDGTNICYQSKSTMRIIDCRETGSSKYPNCAYKTTQVEKHIIVACGGKPSVPVHFDASV--v<br/> KESAAAKFERQHMDSGNSPSSSYCNQMMRRRNMTQGRCKPVNTFVHEPLVDVQNVCFQEKVTCKNGGNCYKSNSSMHIIDCRLINGSRYPNCAYRTSOKERHIIVACEINPYVPVHFDASVve</p> <p>Proposed: aliSize=123 (resi) RMSD=1.09 (Å)<br/> KESAAAKFERQHMDSGNSASSSNYCNQMMCCRKMTQGKCKPVNTFVHESLADVKAVCSQKKVTCKDGTNICYQSKSTMRIIDCRETGSSKYPNCAYKTTQVEKHIIVACGGKPSVPVHFDASV--v<br/> KESAAAKFERQHMDSGNSPSSSYCNQMMRRRNMTQGRCKPVNTFVHEPLVDVQNVCFQEKVTCKNGGNCYKSNSSMHIIDCRLINGSRYPNCAYRTSOKERHIIVACEINPYVPVHFDASVve</p>      |
| 716 | <p>1a2wA<br/>(124)</p> <hr/> <p>11baA<br/>(124)</p> | N | 80.65 | <p>TM-align: aliSize=104 (resi) RMSD=0.77 (Å)<br/> ketaaakferqhmdsstaa-----SSSNYCNQMMKSRNLIKDRCKPVNTFVHESLADVQAVCSQKNVACKNGOTNICYQSYSTMSITDCRETGSSKYPNCAYKTTQANKHIIVACEINPYVPVHFDASV<br/> -----kesaaakferqhmdsgnspSSSNYCNQMMCCRKMTQGKCKPVNTFVHESLADVKAVCSQKKVTCKNGOTNICYQSKSTMRIIDCRETGSSKYPNCAYKTTQVEKHIIVACGGKPSVPVHFDASV</p> <p>SARST: aliSize=121 (resi) RMSD=12.23 (Å)<br/> k-ETAAAKFERQHMDSSTSAASS--SNYCNQMMKSRNLIKDRCKPVNTFVHESLADVQAVCSQKNVACKNGOTNICYQSYSTMSITDCRETGSSKYPNCAYKTTQANKHIIVACEINPYVPVHFDASV--v<br/> -kESAAAKFERQHMD--SGNSPSSSNYCNQMMCCRKMTQGKCKPVNTFVHESLADVKAVCSQKKVTCKNGOTNICYQSKSTMRIIDCRETGSSKYPNCAYKTTQVEKHIIVACGGKPSVPVHFDASVv-</p> <p>BLAST: aliSize=107 (resi) iden=81.45% (101/124) simi=86.29% (107/124)<br/> KETAAAKFERQHMDSSTSAASSSNYCNQMMKSRNLIKDRCKPVNTFVHESLADVQAVCSQKNVACKNGOTNICYQSYSTMSITDCRETGSSKYPNCAYKTTQANKHIIVACEINPYVPVHFDASV<br/> KESAAAKFERQHMDSGNSPSSSNYCNQMMCCRKMTQGKCKPVNTFVHESLADVKAVCSQKKVTCKNGOTNICYQSKSTMRIIDCRETGSSKYPNCAYKTTQVEKHIIVACGGKPSVPVHFDASV</p> <p>Proposed: aliSize=123 (resi) RMSD=0.86 (Å)<br/> KETAAAKFERQHMDSSTSAASSSNYCNQMMKSRNLIKDRCKPVNTFVHESLADVQAVCSQKNVACKNGOTNICYQSYSTMSITDCRETGSSKYPNCAYKTTQANKHIIVACEINPYVPVHFDASV<br/> KESAAAKFERQHMDSGNSPSSSNYCNQMMCCRKMTQGKCKPVNTFVHESLADVKAVCSQKKVTCKNGOTNICYQSKSTMRIIDCRETGSSKYPNCAYKTTQVEKHIIVACGGKPSVPVHFDASV</p> |

|     |             |   |       |                                                                                                                                                                                                                                                                                                                                                                                                                                                                                                                                                                                                                                                                                                                                                                                                                                                                                                                                                                                                                                                                                                                                                                                                                                                                                                                                                                                                                                                                                                                                                                                                                                                                                                                                                                                                                                                                                                                                                                                                                                                                                                                                                                                                                                                                                                                                                                                                                                                                                                                                                                                                                                                                                                                                                                                                               |
|-----|-------------|---|-------|---------------------------------------------------------------------------------------------------------------------------------------------------------------------------------------------------------------------------------------------------------------------------------------------------------------------------------------------------------------------------------------------------------------------------------------------------------------------------------------------------------------------------------------------------------------------------------------------------------------------------------------------------------------------------------------------------------------------------------------------------------------------------------------------------------------------------------------------------------------------------------------------------------------------------------------------------------------------------------------------------------------------------------------------------------------------------------------------------------------------------------------------------------------------------------------------------------------------------------------------------------------------------------------------------------------------------------------------------------------------------------------------------------------------------------------------------------------------------------------------------------------------------------------------------------------------------------------------------------------------------------------------------------------------------------------------------------------------------------------------------------------------------------------------------------------------------------------------------------------------------------------------------------------------------------------------------------------------------------------------------------------------------------------------------------------------------------------------------------------------------------------------------------------------------------------------------------------------------------------------------------------------------------------------------------------------------------------------------------------------------------------------------------------------------------------------------------------------------------------------------------------------------------------------------------------------------------------------------------------------------------------------------------------------------------------------------------------------------------------------------------------------------------------------------------------|
| 717 | 3b8iA (283) | C | 26.15 | <p><b>TM-align: aliSize=249 (resi) RMSD=2.12 (Å)</b><br/> ra-ShHeLRAMr-AALDSSRCYHTASVDFPMSrRIADLFEFCGIIGSVASLQVAAAPDFALILSEFVEOATRIGRVARLPIVADADHICYN-ALNVMRTVVELERAGIAALITIEDITLPAQ-FGPKSTDLICVEFGVGKIRAALAEARVDEPALTIIARTN-AELIDVDVAVIORTLAYOEAGADGICLVC<br/> --sLS-PGKAfr-NAITKENPLQIVGTINANHLLAQRAYQAIYISGGVAAGSGLPDLGISLDDVLDIIRIRTDICSPLLVDADIIFGSSAFNARTVKSIMKAGAGLHIEDQVGAKRcGHPNKAIVSKEMMDRIAAVDAKTDFDFVMARTDLaVEGLDAAIIRAQAYVEAGAEMLFPE</p> <p>GVRDFAHLEAIAEHLHIPLMLVTY---NPqRDDARLARLGRVVVNGHAAYFAIKATYDCLREERGAvasdlTASELskkvtfneevqawardyvevk-----<br/> AITELMYRQFDVAOVVILANITefgATfTTDELRSAHVAALYPLSAFRMNRAAEHVYNVLRQEG-----tqksvidtmqtrnelysesinyyqeekldnlfa</p> <p><b>SARST: aliSize=271 (resi) RMSD=11.39 (Å)</b><br/> rashh---ELRAMFRALDSSRCYHTASVDFPMSrRIADLFEFCGIIGSVASLQVAAAPDFALILSEFVEOATRIGRVARLPIVADADHICYN-ALNVMRTVVELERAGIAALITIEDITLPAQ- ---AOFGrksTDLICVEFGVGKIRAALAEARVDEPALTIIARTN-AEL-IDVDVAVIORTLAYOEAGADGICLVC<br/> -----s1hSPGKAfr-NAITKENPLQIVGTINANHLLAQRAYQAIYISGGVAAGSGLPDLGISLDDVLDIIRIRTDICSPLLVDADIIFGSSAFNARTVKSIMKAGAGLHIEDQVGAKrcgHRPN---KAIVSKEMMDRIAAVDAKTDFDFVMARTDLaVEGLDAAIIRAQAYVEAGAEMLFPE</p> <p>DGTCLVGVRDFAHLFAIAEHLHIPLML-VYGNPOLR-DDARLARLGRVVV---NGHAAYFAIKATYDCLREERGA---VASDLTASELSKKYTFPEEYOAWARDY---mevk<br/> EMLFPEAITELMYRQFDVAOVVILANITefGATPLfTTDELRSAHVAALYpLSAFRAMNRAAEHVYNVLRQEGtqksVIDTMQTRNELYESINYQYQEKLDNLfa----</p> <p><b>BLAST: aliSize=144 (resi) iden=30.63% (87/283) simi=50.70% (144/283)</b><br/> rashHeLRAMr-AALDSSRCYHTASVDFPMSrRIADLFEFCGIIGSVASLQVAAAPDFALILSEFVEOATRIGRVARLPIVADADHICYN-ALNVMRTVVELERAGIAALITIEDITLPAQ-FGPKSTDLICVEFGVGKIRAALAEARVDEPALTIIARTN-AELID-VDAVVIORTLAYOEAGADGICLVC<br/> --sLSPGKAfr-NAITKENPLQIVGTINANHLLAQRAYQAIYISGGVAAGSGLPDLGISLDDVLDIIRIRTDICSPLLVDADIIFGSSAFNARTVKSIMKAGAGLHIEDQVGAKRCghPnKAIIVSKEMMDRIAAVDAKTDFDFVMARTDLaVEGLDAAIIRAQAYVEAGAEMLFPE</p> <p>GVRDFAHLEAIAEHLHIPLM--LVTYINPOL---RDDARLARLGRVV-VNGHAAYFAIKATYDCREER---RGAVASDLTASELSKKYTFPEEYO-----awardyvevk<br/> AITELMYRQFDVAOVVILanITefGATPlftTELSELVAALYpLSAFRAMNRAAEHVYNVLRQEGtqksVIDTMQTRNELYESINY-YYQEKldnlfa-----</p> <p><b>Proposed: aliSize=268 (resi) RMSD=1.91 (Å)</b><br/> ra--ShHeLRAMr-AALDSSRCYHTASVDFPMSrRIADLFEFCGIIGSVASLQVAAAPDFALILSEFVEOATRIGRVARLPIVADADHICYN-ALNVMRTVVELERAGIAALITIEDITLPAQ- ---FGrKSTDLICVEFGVGKIRAALAEARVDEPALTIIARTN-AELIDVDVAVIORTLAYOEAGADG<br/> --s1H-S-PGKAfr-NAITKENPLQIVGTINANHLLAQRAYQAIYISGGVAAGSGLPDLGISLDDVLDIIRIRTDICSPLLVDADIIFGSSAFNARTVKSIMKAGAGLHIEDQV-GNkrcgHR-PNKAIVSKEMMDRIAAVDAKTDFDFVMARTDLaVEGLDAAIIRAQAYVEAGAEM</p> <p>ICLVGVRDFAHLFAIAEHLHIPLMLVTY---NPqRDDARLARLGRVVVNGHAAYFAIKATYDCLREERGA---avasdlTASELSKkyTFPEEYQAWARDYM--V-K---<br/> LPPEAITELMYRQFDVAOVVILANITefgATfTTDELRSAHVAALYPLSAFRMNRAAEHVYNVLRQegtg-----KVIDTM--QTRNELYESINYQYQEKLDnlfa</p> |
|     | 1oqfA (290) |   |       |                                                                                                                                                                                                                                                                                                                                                                                                                                                                                                                                                                                                                                                                                                                                                                                                                                                                                                                                                                                                                                                                                                                                                                                                                                                                                                                                                                                                                                                                                                                                                                                                                                                                                                                                                                                                                                                                                                                                                                                                                                                                                                                                                                                                                                                                                                                                                                                                                                                                                                                                                                                                                                                                                                                                                                                                               |

|     |             |   |       |                                                                                                                                                                                                                                                                                                                                                                                                                                                                                                                                                                                                                                                                                                                                                                                                                                                                                                                                                                                                                                                                                                                                                                                                                                                                                                                                                                                                                                                                                                                                                                                                                                                                                                                                                                                                                                                                                                                                                                                                                                                                                                                                                                                                                                                                                                                                                                                                                                                                                                                                                                                                                                                                                                                                |
|-----|-------------|---|-------|--------------------------------------------------------------------------------------------------------------------------------------------------------------------------------------------------------------------------------------------------------------------------------------------------------------------------------------------------------------------------------------------------------------------------------------------------------------------------------------------------------------------------------------------------------------------------------------------------------------------------------------------------------------------------------------------------------------------------------------------------------------------------------------------------------------------------------------------------------------------------------------------------------------------------------------------------------------------------------------------------------------------------------------------------------------------------------------------------------------------------------------------------------------------------------------------------------------------------------------------------------------------------------------------------------------------------------------------------------------------------------------------------------------------------------------------------------------------------------------------------------------------------------------------------------------------------------------------------------------------------------------------------------------------------------------------------------------------------------------------------------------------------------------------------------------------------------------------------------------------------------------------------------------------------------------------------------------------------------------------------------------------------------------------------------------------------------------------------------------------------------------------------------------------------------------------------------------------------------------------------------------------------------------------------------------------------------------------------------------------------------------------------------------------------------------------------------------------------------------------------------------------------------------------------------------------------------------------------------------------------------------------------------------------------------------------------------------------------------|
| 718 | 3b8iA (283) | C | 25.83 | <p><b>TM-align: aliSize=238 (resi) RMSD=1.99 (Å)</b><br/> rashHeLRAMr-AALDSSRCYHTASVDFPMSrRIADLFEFCGIIGSVASLQVAAAPDFALILSEFVEOATRIGRVARLPIVADADHICYN-ALNVMRTVVELERAGIAALITIEDITLPAQ-FGPKSTDLICVEFGVGKIRAALAEARVDEPALTIIARTN-AELIDVDVAVIORTLAYOEAGADGICLVC<br/> --sLSPGKAfr-NAITKENPLQIVGAINANHLLAQRAYQAIYISGGVAAGSGLPDLGISLDDVLDIIRIRTDICPFLVDADIIFGSSAFNARTVKSIAKAGAAALHIEDQV-----AIVSKEMMDRIAAVDAKTDFDFVMARTDLaVEGLEALDRAQAYVDAGADMLFPEAI</p> <p>RDFAHLEAIAEHLHIPLMLVTY---NPqRDDARLARLGRVVVNGHAAYFAIKATYDCLREERGAvasdlTASELskkvtfneevqawardyvevk-----<br/> TELSMYRRFDVAOVVILANITefgATPlfTTDELRSAHVAALYPLSAFRMNRAAEKVYTVLRQEG-----tqknvidimqtrnelysesinyyqfeekl</p> <p><b>SARST: aliSize=260 (resi) RMSD=9.31 (Å)</b><br/> rashh-ELRAMFRALDSSRCYHTASVDFPMSrRIADLFEFCGIIGSVASLQVAAAPDFALILSEFVEOATRIGRVARLPIVADADHICYN-ALNVMRTVVELERAGIAALITIEDITLPAQ-FGPKSTDLICVEFGVGKIRAALAEARVDEPALTIIARTN-AE-LIDVDVAVIORTLAYOEAGADGICLVG<br/> -----sPGKAfr-NAITKENPLQIVGAINANHLLAQRAYQAIYISGGVAAGSGLPDLGISLDDVLDIIRIRTDICPFLVDADIIFGSSAFNARTVKSIAKAGAAALHIEDQ-----VAIVSKEMMDRIAAVDAKTDFDFVMARTDLaVEGLEALDRAQAYVDAGADMLFPEAI</p> <p>VRFDAHLFAIAEHLHIPLMLVTY-GNPOLR-DDARLARLGRVVVNGHAAYFAIKATYDCLREER---GA---VASDLTASELSKKYTFPEEYQAW-ardymevk<br/> ITELSMYRRFDVAOVVILANITefGATPlfTTDELRSAHVAALYPLSAFRMNRAAEKVYTVLRQEGtqknVIDIMQTRNELYESINYQFEKl-----</p> <p><b>BLAST: aliSize=135 (resi) iden=31.00% (84/271) simi=49.82% (135/271)</b><br/> rashhelram-----RALDSSRCYHTASVDFPMSrRIADLFEFCGIIGSVASLQVAAAPDFALILSEFVEOATRIGRVARLPIVADADHICYN-ALNVMRTVVELERAGIAALITIEDITLPAQ-FGPKSTDLICVEFGVGKIRAALAEARVDEPALTIIARTN-AELID-VDAVVIORTLAYOEAGADGICLVG<br/> -----sPQAfr-NAITKENPLQIVGAINANHLLAQRAYQAIYISGGVAAGSGLPDLGISLDDVLDIIRIRTDICPFLVDADIIFGSSAFNARTVKSIAKAGAAALHIEDQ-----IVSKEMMDRIAAVDAKTDFDFVMARTDLaVEGLEALDRAQAYVDAGADM</p> <p>ICLVGVRDFAHLFAIAEHLHIPLM--LVTYINPOL---RDDARLARLGRVV-VNGHAAYFAIKATYDCREER---RGAVASDLTASELSK---YTFPEE-yqawardyvevk<br/> LPPEAITELSMYRRFDVAOVVILanITefGATPlfTDELSELVAALYpLSAFRAMNRAAEKVYTVLRQEGtqKNVIDIMQTRNELYESINYQFEKl-----</p> <p><b>Proposed: aliSize=255 (resi) RMSD=1.63 (Å)</b><br/> rashHeLRAMr-AALDSSRCYHTASVDFPMSrRIADLFEFCGIIGSVASLQVAAAPDFALILSEFVEOATRIGRVARLPIVADADHICYN-ALNVMRTVVELERAGIAALITIEDITLPAQ-FGPKSTDLICVEFGVGKIRAALAEARVDEPALTIIARTN-AELIDVDVAVIORTLAYOEAGADGICLVC<br/> --sLSPGKAfr-NAITKENPLQIVGAINANHLLAQRAYQAIYISGGVAAGSGLPDLGISLDDVLDIIRIRTDICPFLVDADIIFGSSAFNARTVKSIAKAGAAALHIEDQ-----AIVSKEMMDRIAAVDAKTDFDFVMARTDLaVEGLEALDRAQAYVDAGADMLFPEAI</p> <p>GVRDFAHLEAIAEHLHIPLMLVTY---NPqLRR-DDARLARLGRVVVNGHAAYFAIKATYDCLREERGA---avasdlTASELSKkyTFPEEYQAWARDYMVX-<br/> AITELSMYRRFDVAOVVILANITefgatPL-FTTDELRSAL-HVAALYPLSAFRMNRAAEKVYTVLRQegtg-----KNVIDIM-QTRNELYESINYQFEKl</p> |
|     | 1o5qA (271) |   |       |                                                                                                                                                                                                                                                                                                                                                                                                                                                                                                                                                                                                                                                                                                                                                                                                                                                                                                                                                                                                                                                                                                                                                                                                                                                                                                                                                                                                                                                                                                                                                                                                                                                                                                                                                                                                                                                                                                                                                                                                                                                                                                                                                                                                                                                                                                                                                                                                                                                                                                                                                                                                                                                                                                                                |

|     |             |   |       |                                                                                                                                                                                                                                                                                                                                                                                                                                                                                                                                                                                                                                                                                                                                                                                                                                                                                                                                                                                                                                                                                                                                                                                                                                                                                                                                                                                                                                                                                                                                                                                                                                                                                                                                                                                                                                                                                                                                                                                                                                                                                                                                                                                                                                                                                                                                                                                                                                                                                                                                                                                                                                                                                                                                                                                                                                       |
|-----|-------------|---|-------|---------------------------------------------------------------------------------------------------------------------------------------------------------------------------------------------------------------------------------------------------------------------------------------------------------------------------------------------------------------------------------------------------------------------------------------------------------------------------------------------------------------------------------------------------------------------------------------------------------------------------------------------------------------------------------------------------------------------------------------------------------------------------------------------------------------------------------------------------------------------------------------------------------------------------------------------------------------------------------------------------------------------------------------------------------------------------------------------------------------------------------------------------------------------------------------------------------------------------------------------------------------------------------------------------------------------------------------------------------------------------------------------------------------------------------------------------------------------------------------------------------------------------------------------------------------------------------------------------------------------------------------------------------------------------------------------------------------------------------------------------------------------------------------------------------------------------------------------------------------------------------------------------------------------------------------------------------------------------------------------------------------------------------------------------------------------------------------------------------------------------------------------------------------------------------------------------------------------------------------------------------------------------------------------------------------------------------------------------------------------------------------------------------------------------------------------------------------------------------------------------------------------------------------------------------------------------------------------------------------------------------------------------------------------------------------------------------------------------------------------------------------------------------------------------------------------------------------|
| 719 | 3b8iA (283) | C | 23.67 | <p><b>TM-align: aliSize=244 (resi) RMSD=2.47 (Å)</b><br/> rashHeLRAMr-AALDSSRCYHTASVDFPMSrRIADLFEFCGIIGSVASLQVAAAPDFALILSEFVEOATRIGRVARLPIVADADHICYN-ALNVMRTVVELERAGIAALITIEDITLPAQ-FGPKSTDLICVEFGVGKIRAALAEARVDEPALTIIARTN-AELIDVDVAVIORTLAYOEAGADGICLVC<br/> ---K--TTmhrLIEEHGSVLMMPG-QVALSAVVEKTGHAAFVSYSVSAAAMGLPDLGISLDDVLDIIRIRTDICPFLVDADIIFGSSAFNARTVKSIAKAGAGLHIEDQV-----cghmRGKAVVPAEHALKIAAREAIGSDFFLVARTDaRAPHGLEGIRANLYKEAGADATFV</p> <p>VGVRDFAHLFAIAEHLHIPLMLVTY---NPqRDDARLARLGRVVVNGHAAYFAIKATYDCLREERGAvasdlTASELskkvtfneevqawardyvevk-----<br/> EAPANVDELKEVSATKGLRANMIeggkTPHTPEEFKEMFHLIAHSLTAVYATARALVNIMKILKEG-----ttrddlqmatfsefnelisleswemeskfk</p> <p><b>SARST: aliSize=271 (resi) RMSD=11.18 (Å)</b><br/> rashhelr--AMFRALDSSRCYHTASVDFPMSrRIADLFEFCGIIGSVASLQVAAAPDFALILSEFVEOATRIGRVARLPIVADADHICYN-ALNVMRTVVELERAGIAALITIEDITLPAQ-FGPKSTDLICVEFGVGKIRAALAEARVDEPALTIIARTN-AE-ELIDVDVAVIORTLAYOEAGADGICLVC<br/> -----ktmhrLIEEHGSVLMMPG-QVALSAVVEKTGHAAFVSYSVSAAAMGLPDLGISLDDVLDIIRIRTDICPFLVDADIIFGSSAFNARTVKSIAKAGAGLHIEDQ-----cghmRGKAVVPAEHALKIAAREAIGSDFFLVARTDaRAPHGLEGIRANLYKEAGADATFV</p> <p>VGVRDFAHLFAIAEHLHIPLMLVT-YNPO-QRDDARLARLGRVVV---NGHAAYFAIKATYDCLREERGAVASD---LTASELSKKYTFPEEYOAWARDY-vevk<br/> EAPANVDELKEVSATKGLRANMIeggkTPHTPEEFKEMFHLIAHSLTAVYATARALVNIMKILKEGtTRDDLdQMATFSEFNELISLESWEMESKfk---</p> <p><b>BLAST: aliSize=120 (resi) iden=27.46% (78/283) simi=42.25% (120/283)</b><br/> rashhelramfralldssrcyhtas-----ALDSSRCYHTASVDFPMSrRIADLFEFCGIIGSVASLQVAAAPDFALILSEFVEOATRIGRVARLPIVADADHICYN-ALNVMRTVVELERAGIAALITIEDITLPAQ-FGPKSTDLICVEFGVGKIRAALAEARVDEPALTIIARTN-AEL-IDVDVAVIORTLAYOEAGADGICLVC<br/> -----ktmhrLIEEHGSVLMMPG-QVALSAVVEKTGHAAFVSYSVSAAAMGLPDLGISLDDVLDIIRIRTDICPFLVDADIIFGSSAFNARTVKSIAKAGAGLHIEDQ-----cghmRGKAVVPAEHALKIAAREAIGSDFFLVARTDaRAPHGLEGIRANLYKEAGADATFV</p> <p>ORTLAYOEAGADGICLVC---VGVRDFAHLFAIAEHLHIPLMLVTYINPOLR-DDARLARLGRVVVNGHAAYFAIKATYDCLREER---RGAVASDL---TASELSKKYTFPEEYO-----awardyvevk<br/> RRANLYKEAGADATFVEAPANDELKEVSATKGLRANMIeggkTPHTPEEFKEMFHLIAHSLTAVYATARALVNIMKILKEGtTRDDLdQMATFSEFNELISLESWEMESKfk-----</p> <p><b>Proposed: aliSize=260 (resi) RMSD=1.95 (Å)</b><br/> rashhelramfralldssrcyhtas-----ALDSSRCYHTASVDFPMSrRIADLFEFCGIIGSVASLQVAAAPDFALILSEFVEOATRIGRVARLPIVADADHICYN-ALNVMRTVVELERAGIAALITIEDITLPAQ- ---qfgrKSTDLICVEFGVGKIRAALAEARVDEPALTIIARTN-AELIDVDVAVIORTLAYOEAGADGICLVC<br/> -----kTTmhrLIEEHGSVLMMPG-QVALSAVVEKTGHAAFVSYSVSAAAMGLPDLGISLDDVLDIIRIRTDICPFLVDADIIFGSSAFNARTVKSIAKAGAGLHIEDQ-----GKAVVPAEHALKIAAREAIGSDFFLVARTDaRAPHGLEGIRANLYKEAGAD</p> <p>VGICLVGVRDFAHLFAIAEHLHIPLMLVTY---NPqRDDARLARLGRVVVNGHAAYFAIKATYDCLREERGA-----avasdlTASELSKKYTFPEEYQAWARDYMevk<br/> DATFVEAPANVDELKEVSATKGLRANMIeggkTPHTPEEFKEMFHLIAHSLTAVYATARALVNIMKILKEGttrddlq-----MATFSEFNELISLESWEMESKfk--K--</p> |
|     | 1zlpA (284) |   |       |                                                                                                                                                                                                                                                                                                                                                                                                                                                                                                                                                                                                                                                                                                                                                                                                                                                                                                                                                                                                                                                                                                                                                                                                                                                                                                                                                                                                                                                                                                                                                                                                                                                                                                                                                                                                                                                                                                                                                                                                                                                                                                                                                                                                                                                                                                                                                                                                                                                                                                                                                                                                                                                                                                                                                                                                                                       |





|     |                                             |   |       |                                                                                                                                                                                                                                                                                                                                                                                                                                                                                                                                                                                                                                                                                                                                                                                                                                                                                                                                                                                                                                                      |
|-----|---------------------------------------------|---|-------|------------------------------------------------------------------------------------------------------------------------------------------------------------------------------------------------------------------------------------------------------------------------------------------------------------------------------------------------------------------------------------------------------------------------------------------------------------------------------------------------------------------------------------------------------------------------------------------------------------------------------------------------------------------------------------------------------------------------------------------------------------------------------------------------------------------------------------------------------------------------------------------------------------------------------------------------------------------------------------------------------------------------------------------------------|
| 723 | <p>1k51A<br/>(72)</p> <p>2hj1A<br/>(77)</p> | C | 4.17  | <p><b>TM-align:</b> aliSize=50 (resi) RMSD=2.45 (Å)<br/> mhhhhhhaMeEVTIKANLIaNGSTQTAEEFKG-TFEKaT-SEaYA--YADT-LKkdNGE---WTVdVADkAYtlnikfag-----<br/> -----N-QINTEIAYA--PERYYLKSFOVdegIT-VqTA-ITqSGILSQFP--EIDlStNKIGIFSRPI-----k1tdv1kEgdrieiyrp11</p> <p><b>SARST:</b> aliSize=60 (resi) RMSD=9.14 (Å)<br/> mhhhhhame-EVTIKANLIaNGSTQTAEEFKG---GTFEKATSE--AYAYADTLKkdNGEWTVDVADKA-----YTLNKF---ag<br/> -----nQINTEIAYA--PERYYLKSFOVdegITVQTITITOSGILSQFP--EIDlStNKIGIFSRPIk1tdv1kEgdrieiyrp11--</p> <p><b>BLAST:</b> aliSize=9 (resi) iden=6.94% (5/72) simi=12.50% (9/72)<br/> mhhhhhameevtikanlifangstqtaefkgtfekats-----AYAYADTLKkdNGEWTVD-----vADkAYtlnikfag<br/> -----nqinieiaYAFPERYYLKS--FOVdegitvqtaitqsgilsqfpeidlStnkigifsrpik1tdv1kEgdrieiyrp11-----</p> <p><b>Proposed:</b> aliSize=60 (resi) RMSD=2.30 (Å)<br/> mhhhhhhaMeEVTIKANLIaNGSTQTAEEFKGTFEK-aT-SEaYA-YADTLKkdNGE---WTVdVADK-----AYTLNKFAG--<br/> -----N-QINTEIAYA--PERYYLKSFOVDEGIT-VqTAITQSGILSQFP--EIDlStNKIGIFSRPIk1tdv1kEGDRIEiYRP11</p>                                   |
| 724 | <p>1k52A<br/>(72)</p> <p>2hj1A<br/>(77)</p> | C | 6.94  | <p><b>TM-align:</b> aliSize=49 (resi) RMSD=2.38 (Å)<br/> mhhhhhhamEEVTIKANLIaNGSTQTAEEFKGTF-EKaT-SEaYA--YADTLKkdNGE---WTVdVADkgytlnikfag-----<br/> -----NQINTEIAYA--PERYYLKSFOVDEgIT-VqTA-ITqSGILSQFP-EIDlStNKIGIFSR-----pik1tdv1kEgdrieiyrp11</p> <p><b>SARST:</b> aliSize=59 (resi) RMSD=8.76 (Å)<br/> mhhhhhame-EVTIKANLIaNGSTQTAEEFKG---TFEKATSEAYAYADTLK---KdNGEWTVD-----VADkGYTLNKF---ag<br/> -----nQINTEIAYA--PERYYLKSFOVdegITVQTITITOSGILSQFP--EIDlStNKIGIFSRPIk1tdv1kEgdrieiyrp11--</p> <p><b>BLAST:</b> aliSize=9 (resi) iden=6.94% (5/72) simi=12.50% (9/72)<br/> mhhhhhameevtikanlifangstqtaefkgtfekats-----AYAYADTLKkdNGEWTVD-----vADkgytlnikfag<br/> -----nqinieiaYAFPERYYLKS--FOVdegitvqtaitqsgilsqfpeidlStnkigifsrpik1tdv1kEgdrieiyrp11-----</p> <p><b>Proposed:</b> aliSize=59 (resi) RMSD=2.21 (Å)<br/> mhhhhhhamEEVTIKANLIaNGSTQTAEEFKGTFEK-aTSEaYA--YADTLKkdNGE---WTVdVADK-----Ggytlnikfag--<br/> -----NQINTEIAYA--PERYYLKSFOVDEGIT-VQTITITqSGILSQFP--EIDlStNKIGIFSRPIk1tdv1kEGDRIEiYRP11</p>                                    |
| 725 | <p>1mo1A<br/>(87)</p> <p>1y50A<br/>(87)</p> | N | 24.14 | <p><b>TM-align:</b> aliSize=42 (resi) RMSD=2.38 (Å)<br/> mvqqkvevr1kt-----GLQARPAALFVQENRFTSDVFLKDGKKVNAKST-GL-SLAVStgtevtliaggedeqaeklaayvqeevlq-----<br/> -----aektfkvvsdSGIHARPATILVQTASKWNSEIQLEYNGKTVNLKSmVMSLGIPIKATIKITAEAAEAAMALDIDLAKELAE---</p> <p><b>SARST:</b> aliSize=80 (resi) RMSD=15.72 (Å)<br/> mv-QQKVEVRLKTGLQARPAALFVQENRFTSDVFLKDGKKVNAKST--IGLSLAVSTTEVTILIQEED--EQALEKLAAYVQEE--vlq<br/> --aEKTfKvVSDSGIHARPATILVQTASKWNSEIQLEYNGKTVNLKSmGVMSLGIPIKATIKITAEAAEAAMALDIDLAKELAE---</p> <p><b>BLAST:</b> aliSize=47 (resi) iden=35.29% (30/87) simi=55.29% (47/87)<br/> mvqqkvevr1kt-----TGLQARPAALFVQENRFTSDVFLKDGKKVNAKST-GL-SLAVSTTEVTILIQEED--EQALEKLAAYVQEE--vlq<br/> -----aektfkvvsdSGIHARPATILVQTASKWNSEIQLEYNGKTVNLKSmVMSLGIPIKATIKITAEAAEAAMALDIDLAKELAE---</p> <p><b>Proposed:</b> aliSize=52 (resi) RMSD=1.57 (Å)<br/> mVQKVEVRL-KT-gIQARPAALFVQENRFTSDVFLKDGKKVNAKSTIMGLMSLA-V-----stgtevtliaggedeqaeklaayvqeevlq<br/> --AEKTFKvVSDSGI--HARPATILVQTASKWNSEIQLEYNGKTVNLKSMGVMSLGIPIKATIKITAEAAEAAMALDIDLAKELAE---</p> |

|     |                                                     |   |       |                                                                                                                                                                                                                                                                                                                                                                                                                                                                                                                                                                                                                                                                                                                                                                                                                                                                                                                                                                                                                                                                                                                                                                                                                                                                                                                                                                     |
|-----|-----------------------------------------------------|---|-------|---------------------------------------------------------------------------------------------------------------------------------------------------------------------------------------------------------------------------------------------------------------------------------------------------------------------------------------------------------------------------------------------------------------------------------------------------------------------------------------------------------------------------------------------------------------------------------------------------------------------------------------------------------------------------------------------------------------------------------------------------------------------------------------------------------------------------------------------------------------------------------------------------------------------------------------------------------------------------------------------------------------------------------------------------------------------------------------------------------------------------------------------------------------------------------------------------------------------------------------------------------------------------------------------------------------------------------------------------------------------|
| 726 | <p>1mo1A<br/>(87)</p> <hr/> <p>1y50A<br/>(87)</p>   | C | 31.03 | <p><b>TM-align:</b> aliSize=42 (resi) RMSD=2.38 (Å)<br/> mvqqkvevrlkt-----GLQARPAALFVQENRFTSDVFLKDGKKNVAKSI--SL-SLAVStgtevtliaggedeqaeklaayvqeevlq-----<br/> -----aektfkvvsdsGIHARPATILVCTASKWNSEIQLEYNGKTVNLKSIImVmSLGIP-----kгатiki taegadaaeamaaltdtlakeglae</p> <p><b>SARST:</b> aliSize=80 (resi) RMSD=15.72 (Å)<br/> mv-QQKVEVRLKTLQARPAALFVQENRFTSDVFLKDGKKNVAKSI--IGLSLAVSTGTEVTLI AQTEI--EQEAL EKL AAYVQEE--vlq<br/> --aEKTfKvVSDSGIHARPATILVCTASKWNSEIQLEYNGKTVNLKSIImGVM SLGIPKGATIKITAEADaaAMAALTDTLAKEGLae---</p> <p><b>BLAST:</b> aliSize=47 (resi) iden=35.29% (30/87) simi=55.29% (47/87)<br/> mvqqkvevrlk-----TGLQARPAALFVQENRFTSDVFLKDGKKNVAKSI--LSLAVSTGTEVTLI AQTEI EQEAL EKL AAYVQEEV--q<br/> -----aektfkvvsdsGIHARPATILVCTASKWNSEIQLEYNGKTVNLKSIImVmSLGIPKGATIKITAEADAAEAMAAALTDTLAKEGLae-</p> <p><b>Proposed:</b> aliSize=70 (resi) RMSD=1.63 (Å)<br/> mvqqkvevrlktg-----LQARPAALFVQENRFTSDVFLKDGKKNVAKSIIMGLSL-aVSTGTEVTLI AQTEI EQEAL EKL AAYVqEEV----lq<br/> -----aektfkvvsdsgIHARPATILVCTASKWNSEIQLEYNGKTVNLKSIIMGLSLg-IPKGATIKITAEADAAEAMAAALTDTL-AK Eglae--</p>                                                                                                                                                                                                                                                                        |
| 727 | <p>3bcmA<br/>(119)</p> <hr/> <p>1r5cA<br/>(124)</p> | N | 98.32 | <p><b>TM-align:</b> aliSize=103 (resi) RMSD=0.41 (Å)<br/> kesaaakferqhmdsg-----SSNYCNQMMCCRKMTQGKCKPVNTFVHESLADVKAVCSQKKVTCKDGTNICYOSKSTMRI TDCRETGSSKYPNCAYKTTQVEKHI IVACGGKPSVPVHFDASV<br/> -----kesaaakferqhmdsgnspsSSNYCNLMCCRKMTQGKCKPVNTFVHESLADVKAVCSQKKVTCKNGOTNICYOSKSTMRI TDCRETGSSKYPNCAYKTTQVEKHI IVACGGKPSVPVHFDASV</p> <p><b>SARST:</b> aliSize=117 (resi) RMSD=9.65 (Å)<br/> k-SAAAKFERQHMDSGS-----SSNYCNQMMCCRKMTQGKCKPVNTFVHESLADVKAVCSQKKVTCKDGTNICYOSKSTMRI TDCRETGSSKYPNCAYKTTQVEKHI IVACGGKPSVPVHFDASV -v<br/> -kSAAAKFERQHMDSGnspsSSNYCNLMCCRKMTQGKCKPVNTFVHESLADVKAVCSQKKVTCKNGOTNICYOSKSTMRI TDCRETGSSKYPNCAYKTTQVEKHI IVACGGKPSVPVHFDASV -v</p> <p><b>BLAST:</b> aliSize=118 (resi) iden=98.32% (117/119) simi=99.16% (118/119)<br/> KESAAAKFERQHMDSG-----SSNYCNQMMCCRKMTQGKCKPVNTFVHESLADVKAVCSQKKVTCKDGTNICYOSKSTMRI TDCRETGSSKYPNCAYKTTQVEKHI IVACGGKPSVPVHFDASV<br/> KESAAAKFERQHMDSGnspsSSNYCNLMCCRKMTQGKCKPVNTFVHESLADVKAVCSQKKVTCKNGOTNICYOSKSTMRI TDCRETGSSKYPNCAYKTTQVEKHI IVACGGKPSVPVHFDASV</p> <p><b>Proposed:</b> aliSize=119 (resi) RMSD=0.39 (Å)<br/> KESAAAKFERQHMDSG-----SSNYCNQMMCCRKMTQGKCKPVNTFVHESLADVKAVCSQKKVTCKDGTNICYOSKSTMRI TDCRETGSSKYPNCAYKTTQVEKHI IVACGGKPSVPVHFDASV<br/> KESAAAKFERQHMDSGnspsSSNYCNLMCCRKMTQGKCKPVNTFVHESLADVKAVCSQKKVTCKNGOTNICYOSKSTMRI TDCRETGSSKYPNCAYKTTQVEKHI IVACGGKPSVPVHFDASV</p> |
| 728 | <p>3bcmA<br/>(119)</p> <hr/> <p>1js0A<br/>(124)</p> | C | 83.19 | <p><b>TM-align:</b> aliSize=110 (resi) RMSD=1.41 (Å)<br/> KESAAAKFERQHMDSG-----SSNYCNQMMCCRKMTQGKCKPVNTFVHESLADVKAVCSQKKVTCKDGTNICYOSKSTMRI TDCRETGSSKYPNCAYKTTQVEKHI IVACGGKPSVPVHFDASV<br/> KETAAAKFERQHMDSsTsaaSSNYCNQMMKSRNLTKDRCKPVNTFVHESLADVQAVCSQKNACKNGOTNICYOSYSTMSITDCRETGSSKYPNCAYKTTQANKHI IVAC EGNPY-----vpvhfdasv</p> <p><b>SARST:</b> aliSize=117 (resi) RMSD=6.59 (Å)<br/> k-SAAAKFERQHMD-----SGSSNYCNQMMCCRKMTQGKCKPVNTFVHESLADVKAVCSQKKVTCKDGTNICYOSKSTMRI TDCRETGSSKYPNCAYKTTQVEKHI IVACGGKPSVPVHFDASV -v<br/> -kTAAAKFERQHMDsTsaaSSNYCNQMMKSRNLTKDRCKPVNTFVHESLADVQAVCSQKNACKNGOTNICYOSYSTMSITDCRETGSSKYPNCAYKTTQANKHI IVAC EGNPYVPVHFDASV -v</p> <p><b>BLAST:</b> aliSize=105 (resi) iden=83.19% (99/119) simi=88.24% (105/119)<br/> KESAAAKFERQHMDSG-----SSNYCNQMMCCRKMTQGKCKPVNTFVHESLADVKAVCSQKKVTCKDGTNICYOSKSTMRI TDCRETGSSKYPNCAYKTTQVEKHI IVACGGKPSVPVHFDASV<br/> KETAAAKFERQHMDSsTsaaSSNYCNQMMKSRNLTKDRCKPVNTFVHESLADVQAVCSQKNACKNGOTNICYOSYSTMSITDCRETGSSKYPNCAYKTTQANKHI IVAC EGNPYVPVHFDASV</p> <p><b>Proposed:</b> aliSize=119 (resi) RMSD=0.59 (Å)<br/> KESAAAKFERQHMDSG-----SSNYCNQMMCCRKMTQGKCKPVNTFVHESLADVKAVCSQKKVTCKDGTNICYOSKSTMRI TDCRETGSSKYPNCAYKTTQVEKHI IVACGGKPSVPVHFDASV<br/> KETAAAKFERQHMDSsTsaaSSNYCNQMMKSRNLTKDRCKPVNTFVHESLADVQAVCSQKNACKNGOTNICYOSYSTMSITDCRETGSSKYPNCAYKTTQANKHI IVAC EGNPYVPVHFDASV</p>    |

|     |                                             |   |       |                                                                                                                                                                                                                                                                                                                                                                                                                                                                                                                                                                                                                                                                                                                                                                                                                                                                                                                                                                                                                                                                                                                                                                                                                                                                                                                                                                        |
|-----|---------------------------------------------|---|-------|------------------------------------------------------------------------------------------------------------------------------------------------------------------------------------------------------------------------------------------------------------------------------------------------------------------------------------------------------------------------------------------------------------------------------------------------------------------------------------------------------------------------------------------------------------------------------------------------------------------------------------------------------------------------------------------------------------------------------------------------------------------------------------------------------------------------------------------------------------------------------------------------------------------------------------------------------------------------------------------------------------------------------------------------------------------------------------------------------------------------------------------------------------------------------------------------------------------------------------------------------------------------------------------------------------------------------------------------------------------------|
| 729 | <p>3bcmA (119)</p> <hr/> <p>11bgA (124)</p> | N | 98.32 | <p>TM-align: aliSize=103 (resi) RMSD=0.42 (Å)<br/> kesaaakferqhmds g-----S SNYCN QMMCCRKMTQGKCKPVNTFVHESLADVKAVCSQKKVTCKD GOTNCYQSKSTMRI TDCRETGSSKYPNCAYKTTQVEKHI IVACGGKPSVPVHFDASV<br/> -----kesaaakferqhmds gnsps sS SNYCN LMMCCRKMTQGKCKPVNTFVHESLADVKAVCSQKKVTCKNGOTNCYQSKSTMRI TDCRETGSSKYPNCAYKTTQVEKHI IVACGGKPSVPVHFDASV</p> <p>SARST: aliSize=117 (resi) RMSD=9.73 (Å)<br/> k-ESAAAKFERQHMDSGS-----S SNYCN QMMCCRKMTQGKCKPVNTFVHESLADVKAVCSQKKVTCKD GOTNCYQSKSTMRI TDCRETGSSKYPNCAYKTTQVEKHI IVACGGKPSVPVHFDAS -v<br/> -kESAAAKFERQHMDSGnsps sS SNYCN LMMCCRKMTQGKCKPVNTFVHESLADVKAVCSQKKVTCKNGOTNCYQSKSTMRI TDCRETGSSKYPNCAYKTTQVEKHI IVACGGKPSVPVHFDAS v-</p> <p>BLAST: aliSize=118 (resi) iden=98.32% (117/119) simi=99.16% (118/119)<br/> KESAAAKFERQHMDSG-----S SNYCN QMMCCRKMTQGKCKPVNTFVHESLADVKAVCSQKKVTCKD GOTNCYQSKSTMRI TDCRETGSSKYPNCAYKTTQVEKHI IVACGGKPSVPVHFDASV<br/> KESAAAKFERQHMDSGnsps sS SNYCN LMMCCRKMTQGKCKPVNTFVHESLADVKAVCSQKKVTCKNGOTNCYQSKSTMRI TDCRETGSSKYPNCAYKTTQVEKHI IVACGGKPSVPVHFDASV</p> <p>Proposed: aliSize=119 (resi) RMSD=0.42 (Å)<br/> KESAAAKFERQHMDSG-----S SNYCN QMMCCRKMTQGKCKPVNTFVHESLADVKAVCSQKKVTCKD GOTNCYQSKSTMRI TDCRETGSSKYPNCAYKTTQVEKHI IVACGGKPSVPVHFDASV<br/> KESAAAKFERQHMDSGnsps sS SNYCN LMMCCRKMTQGKCKPVNTFVHESLADVKAVCSQKKVTCKNGOTNCYQSKSTMRI TDCRETGSSKYPNCAYKTTQVEKHI IVACGGKPSVPVHFDASV</p>  |
| 730 | <p>3bcmA (119)</p> <hr/> <p>1tq9A (124)</p> | N | 96.64 | <p>TM-align: aliSize=101 (resi) RMSD=0.42 (Å)<br/> kesaaakferqhmds g-----S SNYCN QMMCCRKMTQGKCKPVNTFVHESLADVKAVCSQKKVTCKD GOTNCYQSKSTMRI TDCRETGSSKYPNCAYKTTQVEKHI IVACGGKPSVPVHFDASV<br/> -----kesaaakferqhmds gnsps sS SNYCN LMM--RKMTQGKCKPVNTFVHESLADVKAVCSQKKVTCKNGOTNCYQSKSTMRI TDCRETGSSKYPNCAYKTTQVEKHI IVACGGKPSVPVHFDASV</p> <p>SARST: aliSize=115 (resi) RMSD=11.28 (Å)<br/> k-ESAAAKFERQHMDSGS-----S SNYCN QMMCCRKMTQGKCKPVNTFVHESLADVKAVCSQKKVTCKD GOTNCYQSKSTMRI TDCRETGSSKYPNCAYKTTQVEKHI IVACGGKPSVPVHFDAS -v<br/> -kESAAAKFERQHMDSGnsps sS SNYCN LMMR--KMTQGKCKPVNTFVHESLADVKAVCSQKKVTCKNGOTNCYQSKSTMRI TDCRETGSSKYPNCAYKTTQVEKHI IVACGGKPSVPVHFDAS v-</p> <p>BLAST: aliSize=116 (resi) iden=96.64% (115/119) simi=97.48% (116/119)<br/> KESAAAKFERQHMDSG-----S SNYCN QMMCCRKMTQGKCKPVNTFVHESLADVKAVCSQKKVTCKD GOTNCYQSKSTMRI TDCRETGSSKYPNCAYKTTQVEKHI IVACGGKPSVPVHFDASV<br/> KESAAAKFERQHMDSGnsps sS SNYCN LMM--RKMTQGKCKPVNTFVHESLADVKAVCSQKKVTCKNGOTNCYQSKSTMRI TDCRETGSSKYPNCAYKTTQVEKHI IVACGGKPSVPVHFDASV</p> <p>Proposed: aliSize=119 (resi) RMSD=0.41 (Å)<br/> KESAAAKFERQHMDSG-----S SNYCN QMMCCRKMTQGKCKPVNTFVHESLADVKAVCSQKKVTCKD GOTNCYQSKSTMRI TDCRETGSSKYPNCAYKTTQVEKHI IVACGGKPSVPVHFDASV<br/> KESAAAKFERQHMDSGnsps sS SNYCN LMMYYRKMTQGKCKPVNTFVHESLADVKAVCSQKKVTCKNGOTNCYQSKSTMRI TDCRETGSSKYPNCAYKTTQVEKHI IVACGGKPSVPVHFDASV</p> |
| 731 | <p>3bcmA (119)</p> <hr/> <p>1r5dA (124)</p> | N | 98.32 | <p>TM-align: aliSize=103 (resi) RMSD=0.47 (Å)<br/> kesaaakferqhmds g-----S SNYCN QMMCCRKMTQGKCKPVNTFVHESLADVKAVCSQKKVTCKD GOTNCYQSKSTMRI TDCRETGSSKYPNCAYKTTQVEKHI IVACGGKPSVPVHFDASV<br/> -----kesaaakferqhmds gnsps sS SNYCN LMMCCRKMTQGKCKPVNTFVHESLADVKAVCSQKKVTCKNGOTNCYQSKSTMRI TDCRETGSSKYPNCAYKTTQVEKHI IVACGGKPSVPVHFDASV</p> <p>SARST: aliSize=117 (resi) RMSD=9.67 (Å)<br/> k-ESAAAKFERQHMDSGS-----S SNYCN QMMCCRKMTQGKCKPVNTFVHESLADVKAVCSQKKVTCKD GOTNCYQSKSTMRI TDCRETGSSKYPNCAYKTTQVEKHI IVACGGKPSVPVHFDAS -v<br/> -kESAAAKFERQHMDSGnsps sS SNYCN LMMCCRKMTQGKCKPVNTFVHESLADVKAVCSQKKVTCKNGOTNCYQSKSTMRI TDCRETGSSKYPNCAYKTTQVEKHI IVACGGKPSVPVHFDAS v-</p> <p>BLAST: aliSize=118 (resi) iden=98.32% (117/119) simi=99.16% (118/119)<br/> KESAAAKFERQHMDSG-----S SNYCN QMMCCRKMTQGKCKPVNTFVHESLADVKAVCSQKKVTCKD GOTNCYQSKSTMRI TDCRETGSSKYPNCAYKTTQVEKHI IVACGGKPSVPVHFDASV<br/> KESAAAKFERQHMDSGnsps sS SNYCN LMMCCRKMTQGKCKPVNTFVHESLADVKAVCSQKKVTCKNGOTNCYQSKSTMRI TDCRETGSSKYPNCAYKTTQVEKHI IVACGGKPSVPVHFDASV</p> <p>Proposed: aliSize=119 (resi) RMSD=0.44 (Å)<br/> KESAAAKFERQHMDSG-----S SNYCN QMMCCRKMTQGKCKPVNTFVHESLADVKAVCSQKKVTCKD GOTNCYQSKSTMRI TDCRETGSSKYPNCAYKTTQVEKHI IVACGGKPSVPVHFDASV<br/> KESAAAKFERQHMDSGnsps sS SNYCN LMMCCRKMTQGKCKPVNTFVHESLADVKAVCSQKKVTCKNGOTNCYQSKSTMRI TDCRETGSSKYPNCAYKTTQVEKHI IVACGGKPSVPVHFDASV</p>  |

|     |                                                     |   |       |                                                                                                                                                                                                                                                                                                                                                                                                                                                                                                                                                                                                                                                                                                                                                                                                                                                                                                                                                                                                                                                                                                                                                                                                                                                                                                                                    |
|-----|-----------------------------------------------------|---|-------|------------------------------------------------------------------------------------------------------------------------------------------------------------------------------------------------------------------------------------------------------------------------------------------------------------------------------------------------------------------------------------------------------------------------------------------------------------------------------------------------------------------------------------------------------------------------------------------------------------------------------------------------------------------------------------------------------------------------------------------------------------------------------------------------------------------------------------------------------------------------------------------------------------------------------------------------------------------------------------------------------------------------------------------------------------------------------------------------------------------------------------------------------------------------------------------------------------------------------------------------------------------------------------------------------------------------------------|
| 732 | <p>3bcmA<br/>(119)</p> <hr/> <p>1a2wA<br/>(124)</p> | N | 83.19 | <p>TM-align: aliSize=103 (resi) RMSD=0.51 (Å)<br/> kesaaakferqhmdsg-----SSNYCNQMMCCRKMTQGKCKPVNTFVHESLADVKAVCSQKKVTCKDQOTNCYOSKSTMRIIDCRETGSSSKYPNCAYKTTQVEKHIIVACGGKPSVPVHFDASV<br/> -----ketaaakferqhmdsstsaasSSNYCNQMMKSRNLTCKDRCKPVNTFVHESLADVQAVCSQKNVACKNGOTNCYOSYSTMSITDCRETGSSSKYPNCAYKTTQANKHIIIVACEGNYVPVHFDASV</p> <p>SARST: aliSize=117 (resi) RMSD=14.11 (Å)<br/> k-ESAAAKFERQHMD---SGSSNYCNQMMCCRKMTQGKCKPVNTFVHESLADVKAVCSQKKVTCKDQOTNCYOSKSTMRIIDCRETGSSSKYPNCAYKTTQVEKHIIVACGGKPSVPVHFDASV-v<br/> -kETAAAKFERQHMDsstsaASSNYCNQMMKSRNLTCKDRCKPVNTFVHESLADVQAVCSQKNVACKNGOTNCYOSYSTMSITDCRETGSSSKYPNCAYKTTQANKHIIIVACEGNYVPVHFDASV-v</p> <p>BLAST: aliSize=105 (resi) iden=83.19% (99/119) simi=88.24% (105/119)<br/> KESAAAKFERQHMDSG----SSNYCNQMMCCRKMTQGKCKPVNTFVHESLADVKAVCSQKKVTCKDQOTNCYOSKSTMRIIDCRETGSSSKYPNCAYKTTQVEKHIIVACGGKPSVPVHFDASV<br/> KETAAAKFERQHMDSStsaasSSNYCNQMMKSRNLTCKDRCKPVNTFVHESLADVQAVCSQKNVACKNGOTNCYOSYSTMSITDCRETGSSSKYPNCAYKTTQANKHIIIVACEGNYVPVHFDASV</p> <p>Proposed: aliSize=119 (resi) RMSD=0.58 (Å)<br/> KESAAAKFERQHMDS-G----SSNYCNQMMCCRKMTQGKCKPVNTFVHESLADVKAVCSQKKVTCKDQOTNCYOSKSTMRIIDCRETGSSSKYPNCAYKTTQVEKHIIVACGGKPSVPVHFDASV<br/> KETAAAKFERQHMDSstsaasSSNYCNQMMKSRNLTCKDRCKPVNTFVHESLADVQAVCSQKNVACKNGOTNCYOSYSTMSITDCRETGSSSKYPNCAYKTTQANKHIIIVACEGNYVPVHFDASV</p> |
| 733 | <p>3bcmA<br/>(119)</p> <hr/> <p>11baA<br/>(124)</p> | N | 98.32 | <p>TM-align: aliSize=103 (resi) RMSD=0.38 (Å)<br/> kesaaakferqhmdsg-----SSNYCNQMMCCRKMTQGKCKPVNTFVHESLADVKAVCSQKKVTCKDQOTNCYOSKSTMRIIDCRETGSSSKYPNCAYKTTQVEKHIIVACGGKPSVPVHFDASV<br/> -----kesaaakferqhmdsgnspssSSNYCNLMCCRKMTQGKCKPVNTFVHESLADVKAVCSQKKVTCKDQOTNCYOSKSTMRIIDCRETGSSSKYPNCAYKTTQVEKHIIVACGGKPSVPVHFDASV</p> <p>SARST: aliSize=117 (resi) RMSD=9.62 (Å)<br/> k-ESAAAKFERQHMDSGS----SNYCNQMMCCRKMTQGKCKPVNTFVHESLADVKAVCSQKKVTCKDQOTNCYOSKSTMRIIDCRETGSSSKYPNCAYKTTQVEKHIIVACGGKPSVPVHFDASV-v<br/> -kESAAAKFERQHMDSGnspssSNYCNLMCCRKMTQGKCKPVNTFVHESLADVKAVCSQKKVTCKDQOTNCYOSKSTMRIIDCRETGSSSKYPNCAYKTTQVEKHIIVACGGKPSVPVHFDASV-v</p> <p>BLAST: aliSize=118 (resi) iden=98.32% (117/119) simi=99.16% (118/119)<br/> KESAAAKFERQHMDSG----SSNYCNQMMCCRKMTQGKCKPVNTFVHESLADVKAVCSQKKVTCKDQOTNCYOSKSTMRIIDCRETGSSSKYPNCAYKTTQVEKHIIVACGGKPSVPVHFDASV<br/> KESAAAKFERQHMDSGnspssSNYCNLMCCRKMTQGKCKPVNTFVHESLADVKAVCSQKKVTCKDQOTNCYOSKSTMRIIDCRETGSSSKYPNCAYKTTQVEKHIIVACGGKPSVPVHFDASV</p> <p>Proposed: aliSize=119 (resi) RMSD=0.36 (Å)<br/> KESAAAKFERQHMDSG----SSNYCNQMMCCRKMTQGKCKPVNTFVHESLADVKAVCSQKKVTCKDQOTNCYOSKSTMRIIDCRETGSSSKYPNCAYKTTQVEKHIIVACGGKPSVPVHFDASV<br/> KESAAAKFERQHMDSGnspssSNYCNLMCCRKMTQGKCKPVNTFVHESLADVKAVCSQKKVTCKDQOTNCYOSKSTMRIIDCRETGSSSKYPNCAYKTTQVEKHIIVACGGKPSVPVHFDASV</p>           |
| 734 | <p>3bcmA<br/>(119)</p> <hr/> <p>1h8xA<br/>(125)</p> | N | 75.63 | <p>TM-align: aliSize=103 (resi) RMSD=1.19 (Å)<br/> kesaaakferqhmdsg-----SSNYCNQMMCCRKMTQGKCKPVNTFVHESLADVKAVCSQKKVTCKDQOTNCYOSKSTMRIIDCRETGSSSKYPNCAYKTTQVEKHIIVACGGKPSVPVHFDASV<br/> -----kesaaakferqhmdsgnspssSSTYCNQMMRRRNMTQGRCKPVNTFVHEPLVDVQNVCFQEKVTCKNGGNCYKSNSSMHIIDCRLINGSRYPNCAYRTSOKERHIIIVACEGSPYVPVHFDASVe</p> <p>SARST: aliSize=117 (resi) RMSD=14.08 (Å)<br/> k-ESAAAKFERQHMD---SGSSN--YCNQMMCCRKMTQGKCKPVNTFVHESLADVKAVCSQKKVTCKDQOTNCYOSKSTMRIIDCRETGSSSKYPNCAYKTTQVEKHIIVACGGKPSVPVHFDASV-v<br/> -kESAAAKFERQHMDsgnSPSSStYCNQMMRRRNMTQGRCKPVNTFVHEPLVDVQNVCFQEKVTCKNGGNCYKSNSSMHIIDCRLINGSRYPNCAYRTSOKERHIIIVACEGSPYVPVHFDASV-ve</p> <p>BLAST: aliSize=101 (resi) iden=76.47% (91/119) simi=84.87% (101/119)<br/> KESAAAKFERQHMDSG----SSNYCNQMMCCRKMTQGKCKPVNTFVHESLADVKAVCSQKKVTCKDQOTNCYOSKSTMRIIDCRETGSSSKYPNCAYKTTQVEKHIIVACGGKPSVPVHFDASV<br/> KESAAAKFERQHMDSGnspssSSTYCNQMMRRRNMTQGRCKPVNTFVHEPLVDVQNVCFQEKVTCKNGGNCYKSNSSMHIIDCRLINGSRYPNCAYRTSOKERHIIIVACEGSPYVPVHFDASVe</p> <p>Proposed: aliSize=119 (resi) RMSD=1.04 (Å)<br/> KESAAAKFERQHMDSG--S---SNYCNQMMCCRKMTQGKCKPVNTFVHESLADVKAVCSQKKVTCKDQOTNCYOSKSTMRIIDCRETGSSSKYPNCAYKTTQVEKHIIVACGGKPSVPVHFDASV<br/> KESAAAKFERQHMDSGnspssSSTYCNQMMRRRNMTQGRCKPVNTFVHEPLVDVQNVCFQEKVTCKNGGNCYKSNSSMHIIDCRLINGSRYPNCAYRTSOKERHIIIVACEGSPYVPVHFDASVe</p>   |

|     |                |   |       |                                                                                                                                                                                                                                                                                                                                                                                                                                                                                                                                                                                                                                                                                                                                                                                                                                                                                                                                                                                                                                                                                                                                                                                                                                                                                                                                        |
|-----|----------------|---|-------|----------------------------------------------------------------------------------------------------------------------------------------------------------------------------------------------------------------------------------------------------------------------------------------------------------------------------------------------------------------------------------------------------------------------------------------------------------------------------------------------------------------------------------------------------------------------------------------------------------------------------------------------------------------------------------------------------------------------------------------------------------------------------------------------------------------------------------------------------------------------------------------------------------------------------------------------------------------------------------------------------------------------------------------------------------------------------------------------------------------------------------------------------------------------------------------------------------------------------------------------------------------------------------------------------------------------------------------|
| 735 | 1tq9A<br>(124) | N | 98.36 | <p>TM-align: aliSize=103 (resi) RMSD=1.21 (Å)<br/> kesaaakferqhmdsgnsp-----SSSSNYCNLM--RKMTQGKCKPVNTFVHESLADVKAVCSQKKVTCKNGQTNCYQSKSTMRI TDCRETGSSKYPNCAYKTTQVEKHI I VACGGKPSVPVHFDASV<br/> -----kesaaakferqhmdsgnSPSSNYCNLMccRKMTQGKCKPVNTFVHESLADVKAVCSQKKVTCKNGQTNCYQSKSTMRI TDCRETGSSKYPNCAYKTTQVEKHI I VACGGKPSVPVHFDASV</p> <p>SARST: aliSize=120 (resi) RMSD=11.24 (Å)<br/> k-ESAAAKFERQHMDSGNSPSSSNYCNLM--RKMTQGKCKPVNTFVHESLADVKAVCSQKKVTCKNGQTNCYQSKSTMRI TDCRETGSSKYPNCAYKTTQVEKHI I VACGGKPSVPVHFDAS-v<br/> -kESAAAKFERQHMDSGNSPSSNYCNLMCCRKMTQGKCKPVNTFVHESLADVKAVCSQKKVTCKNGQTNCYQSKSTMRI TDCRETGSSKYPNCAYKTTQVEKHI I VACGGKPSVPVHFDASv-</p> <p>BLAST: aliSize=120 (resi) iden=98.36% (120/122) simi=98.36% (120/122)<br/> KESAAAKFERQHMDSGNSPSSSNYCNLM--RKMTQGKCKPVNTFVHESLADVKAVCSQKKVTCKNGQTNCYQSKSTMRI TDCRETGSSKYPNCAYKTTQVEKHI I VACGGKPSVPVHFDASV<br/> KESAAAKFERQHMDSGNSPSS--NYCNLMccRKMTQGKCKPVNTFVHESLADVKAVCSQKKVTCKNGQTNCYQSKSTMRI TDCRETGSSKYPNCAYKTTQVEKHI I VACGGKPSVPVHFDASV</p> <p>Proposed: aliSize=122 (resi) RMSD=0.62 (Å)<br/> KESAAAKFERQHMDSGNSPSSSNYCNLMYYRKMTQGKCKPVNTFVHESLADVKAVCSQKKVTCKNGQTNCYQSKSTMRI TDCRETGSSKYPNCAYKTTQVEKHI I VACGGKPSVPVHFDASV<br/> KESAAAKFERQHMDSGNSP--SNYCNLMCCRKMTQGKCKPVNTFVHESLADVKAVCSQKKVTCKNGQTNCYQSKSTMRI TDCRETGSSKYPNCAYKTTQVEKHI I VACGGKPSVPVHFDASV</p> |
| 736 | 1k50A<br>(63)  | C | 96.83 | <p>TM-align: aliSize=53 (resi) RMSD=1.02 (Å)<br/> -----EEVTIKANLIFANGSTQAEFKGTFEKATSEAYAYADTLKKDNGEWTADVADKgytlnikfag-----<br/> mhhhhhhamEEVTIKANLIFANGSTQAEFKGTFEKATSEAYAYADTLKKDNGEWTVDVADK-----aytlnikfag</p> <p>SARST: aliSize=58 (resi) RMSD=8.41 (Å)<br/> e-----EVTIKANLIFANGSTQAEFKGTFEKATSEAYAYADTLKKDNGEWTADVADKGYTLN IKF-----ag<br/> -mhhhhhhamEEVTIKANLIFANGSTQAEFKGTFEKATSEAYAYADTLKKDNGEWTVDVADKAYTLN IKfag--</p> <p>BLAST: aliSize=61 (resi) iden=96.83% (61/63) simi=96.83% (61/63)<br/> -----EEVTIKANLIFANGSTQAEFKGTFEKATSEAYAYADTLKKDNGEWTADVADKGYTLN IKFAG<br/> mhhhhhhamEEVTIKANLIFANGSTQAEFKGTFEKATSEAYAYADTLKKDNGEWTVDVADKAYTLN IKFAG</p> <p>Proposed: aliSize=63 (resi) RMSD=1.15 (Å)<br/> -----EEVTIKANLIFANGSTQAEFKGTFEKATSEAYAYADTLKKDNGEWTADVADKGYTLN IKFAG<br/> mhhhhhhamEEVTIKANLIFANGSTQAEFKGTFEKATSEAYAYADTLKKDNGEWTVDVADKAYTLN IKFAG</p>                                                                                                                                                                                                                                                                                                                                                                                                                                                                |
| 737 | 1k50A<br>(63)  | C | 93.65 | <p>TM-align: aliSize=53 (resi) RMSD=1.08 (Å)<br/> -----EEVTIKANLIFANGSTQAEFKGTFEKATSEAYAYADTLKKDNGEWTADVADKgytlnikfag-----<br/> mhhhhhghmEEVTIKANLIFANGSTQAEFKGTFEKATSEAYAYADTLKKDNGEWTVDVVPK-----aytlnikfag</p> <p>SARST: aliSize=58 (resi) RMSD=8.28 (Å)<br/> e-----EVTIKANLIFANGSTQAEFKGTFEKATSEAYAYADTLKKDNGEWTADVADKGYTLN IKF-----ag<br/> -mhhhhhghmeEVTIKANLIFANGSTQAEFKGTFEKATSEAYAYADTLKKDNGEWTVDV--PKAYTLN IKfag--</p> <p>BLAST: aliSize=59 (resi) iden=93.65% (59/63) simi=93.65% (59/63)<br/> -----EEVTIKANLIFANGSTQAEFKGTFEKATSEAYAYADTLKKDNGEWTADVADKGYTLN IKFAG<br/> mhhhhhghmEEVTIKANLIFANGSTQAEFKGTFEKATSEAYAYADTLKKDNGEWTVDVVPKAYTLN IKFAG</p> <p>Proposed: aliSize=63 (resi) RMSD=1.19 (Å)<br/> -----EEVTIKANLIFANGSTQAEFKGTFEKATSEAYAYADTLKKDNGEWTADVADKGYTLN IKFAG<br/> mhhhhhghmEEVTIKANLIFANGSTQAEFKGTFEKATSEAYAYADTLKKDNGEWTVDVVPKAYTLN IKFAG</p>                                                                                                                                                                                                                                                                                                                                                                                                                                                               |
|     | 1jmlA<br>(72)  |   |       |                                                                                                                                                                                                                                                                                                                                                                                                                                                                                                                                                                                                                                                                                                                                                                                                                                                                                                                                                                                                                                                                                                                                                                                                                                                                                                                                        |

|     |                                                   |   |       |                                                                                                                                                                                                                                                                                                                                                                                                                                                                                                                                                                                                                                                                                                                                                                                                                                                                                                                                                                                                                                                                                |
|-----|---------------------------------------------------|---|-------|--------------------------------------------------------------------------------------------------------------------------------------------------------------------------------------------------------------------------------------------------------------------------------------------------------------------------------------------------------------------------------------------------------------------------------------------------------------------------------------------------------------------------------------------------------------------------------------------------------------------------------------------------------------------------------------------------------------------------------------------------------------------------------------------------------------------------------------------------------------------------------------------------------------------------------------------------------------------------------------------------------------------------------------------------------------------------------|
| 738 | <p>1jmlA<br/>(72)</p> <hr/> <p>2hj1A<br/>(77)</p> | C | 4.17  | <p><b>TM-align:</b> aliSize=50 (resi) RMSD=2.46 (Å)<br/> mhhhhhghMeEVTIKANLIaNGSTQTAEFKGTFEKaT-SEaYA--YADT-LkKdNGE---WTVVVPKAYtlnikfag-----<br/> -----N-QINTEIAYA--PERYYLKSFOVDEGIT-VqTA-ITqSGILSqF-P-EIDlStNKIGIFSRPI-----k1tdv1kEgdrieiyrp11</p> <p><b>SARST:</b> aliSize=60 (resi) RMSD=8.92 (Å)<br/> mhhhhhghme-EVTIKANLIaNGSTQTAEFK---GTFEKATSEAYAYADTLK--KDNGEWTVVVPKA-----YTLNKF---ag<br/> -----nQINTEIAYA--PERYYLKSFOVdegITVQTITQSGILSQFPEidLSTNKIGIFSRPIK1tdv1kEgDRIEVYRpl1--</p> <p><b>BLAST:</b> aliSize=9 (resi) iden=6.94% (5/72) simi=12.50% (9/72)<br/> mhhhhhghmevtikanlifangstqtaefkgtfekats-----AYAYADTLKKNgeWTVD-----vvpkaytlnikfag<br/> -----nqinieiaYAFPERYYLKS--FOVdegitvqtaitqsgilsqfpeidlstnkigifsrpik1tdv1kEgdrieiyrp11-----</p> <p><b>Proposed:</b> aliSize=60 (resi) RMSD=2.36 (Å)<br/> mhhhhhghMeEVTIKANLIaNGSTQTAEFKGTFEK-aT-SEAYA-YADTLKKNge---WTVVVPK-----AYTLNIKfag--<br/> -----N-QINTEIAYA--PERYYLKSFOVDEGIT-VqTAITQSGILSqFP-EIDlStNKIGIFSRpik1tdv1kEGDRIEYRPl1</p>                                                                           |
| 739 | <p>1mu4A<br/>(86)</p> <hr/> <p>1y50A<br/>(87)</p> | N | 26.74 | <p><b>TM-align:</b> aliSize=44 (resi) RMSD=2.33 (Å)<br/> mvqqkvevr1kt-----GLQARPAALFVQEANRFTSDVFLKDGKKVNAKSLMGLMSLAVStgtevtliaggedeqaaleklaayvqeevl-----<br/> -----aektfkvvsdsGIHARPATILVQTASKWNSEIQLEYNGKTVNLKSLMGVMSLGIp-----kgatikitaegadaaeamaaltdtlakeglae</p> <p><b>SARST:</b> aliSize=81 (resi) RMSD=15.73 (Å)<br/> mv-QQKVEVRLKTLGLOARPAALFVQEANRFTSDVFLKDGKKVNAKSLMGLMSLAVSTTEVTILIAQEEDEQ--EALEKLAAYVQE---evl<br/> --aEKTfKvVSDSGIHARPATILVQTASKWNSEIQLEYNGKTVNLKSLMGVMSLGIpKATIKITAEADAAEaMALTDTLAKEGlae---</p> <p><b>BLAST:</b> aliSize=49 (resi) iden=37.21% (32/86) simi=56.98% (49/86)<br/> mvqqkvevr1k-----TGLQARPAALFVQEANRFTSDVFLKDGKKVNAKSLMGLMSLAVSTTEVTILIAQEEDEQ--EALEKLAAYVQEEV---<br/> -----aektfkvvsdsGIHARPATILVQTASKWNSEIQLEYNGKTVNLKSLMGVMSLGIpKATIKITAEADAAEaMALTDTLAKEGlae---</p> <p><b>Proposed:</b> aliSize=52 (resi) RMSD=1.55 (Å)<br/> mVQKVEVRL-KT-gIQARPAALFVQEANRFTSDVFLKDGKKVNAKSLMGLMSLA-V-----stgtevtliaggedeqaaleklaayvqeevl<br/> -AEKTfKvVSDSGi--HARPATILVQTASKWNSEIQLEYNGKTVNLKSLMGVMSLGIpKatikitaegadaaeamaaltdtlakeglae-----</p>  |
| 740 | <p>1mu4A<br/>(86)</p> <hr/> <p>1y50A<br/>(87)</p> | C | 34.88 | <p><b>TM-align:</b> aliSize=44 (resi) RMSD=2.33 (Å)<br/> mvqqkvevr1kt-----GLQARPAALFVQEANRFTSDVFLKDGKKVNAKSLMGLMSLAVStgtevtliaggedeqaaleklaayvqeevl-----<br/> -----aektfkvvsdsGIHARPATILVQTASKWNSEIQLEYNGKTVNLKSLMGVMSLGIp-----kgatikitaegadaaeamaaltdtlakeglae</p> <p><b>SARST:</b> aliSize=81 (resi) RMSD=15.73 (Å)<br/> mv-QQKVEVRLKTLGLOARPAALFVQEANRFTSDVFLKDGKKVNAKSLMGLMSLAVSTTEVTILIAQEEDEQ--EALEKLAAYVQE---evl<br/> --aEKTfKvVSDSGIHARPATILVQTASKWNSEIQLEYNGKTVNLKSLMGVMSLGIpKATIKITAEADAAEaMALTDTLAKEGlae---</p> <p><b>BLAST:</b> aliSize=49 (resi) iden=37.21% (32/86) simi=56.98% (49/86)<br/> mvqqkvevr1k-----TGLQARPAALFVQEANRFTSDVFLKDGKKVNAKSLMGLMSLAVSTTEVTILIAQEEDEQ--EALEKLAAYVQEEV---<br/> -----aektfkvvsdsGIHARPATILVQTASKWNSEIQLEYNGKTVNLKSLMGVMSLGIpKATIKITAEADAAEaMALTDTLAKEGlae---</p> <p><b>Proposed:</b> aliSize=71 (resi) RMSD=1.75 (Å)<br/> mvqqkvevr1ktg-----LQARPAALFVQEANRFTSDVFLKDGKKVNAKSLMGLMSLAVSTTEVTILIAQEEDEQ--EALEKLAAYVQEE---v1<br/> -----aektfkvvsdsgIHARPATILVQTASKWNSEIQLEYNGKTVNLKSLMGVMSLGIpKATIKITAEADAAEaMALTDTLAKEGlae---</p> |

|     |                                                     |   |       |                                                                                                                                                                                                                                                                                                                                                                                                                                                                                                                                                                                                                                                                                                                                                                                                                                                                                                                                                                                                                                                                                                                                                                                                                                                                                                                                                                          |
|-----|-----------------------------------------------------|---|-------|--------------------------------------------------------------------------------------------------------------------------------------------------------------------------------------------------------------------------------------------------------------------------------------------------------------------------------------------------------------------------------------------------------------------------------------------------------------------------------------------------------------------------------------------------------------------------------------------------------------------------------------------------------------------------------------------------------------------------------------------------------------------------------------------------------------------------------------------------------------------------------------------------------------------------------------------------------------------------------------------------------------------------------------------------------------------------------------------------------------------------------------------------------------------------------------------------------------------------------------------------------------------------------------------------------------------------------------------------------------------------|
| 741 | <p>2ck2B<br/>(96)</p> <hr/> <p>1wwaX<br/>(105)</p>  | N | 9.38  | <p><b>TM-align:</b> aliSize=71 (resi) RMSD=3.60 (Å)<br/> vsdvprdievva-----VtptSALISWDAPaVT-IRYIRLTYGeTggnSPVQEI----TL-P-----GSKSTYITISGLKPGTDYTVLISVTVGrgdspASSKPASINFRTEI-----<br/> -----vsfpasvqlhtaveEMH--HWCIPFSVD-GQpAPSLRWLFN-G----SILNEtsfiFTeFlapaanetVRHGCLRLNQPTHVNGNYTLAANP-----FGQASASIMAAFMDnpfefn</p> <p><b>SARST:</b> aliSize=82 (resi) RMSD=12.47 (Å)<br/> vs-----DVPRIEIVAVTptSALISWDAPavtirIRYIRTYGETGNSPV-----QITLFGS-KSTYITISGLKPGT----DYTVLISVTVGRGDSPPASSKPASINFRTE-----i<br/> --vsfpasvqlHTAVEMHH-WCI--PFSVDGQPA-----PSLRWLFNCSVLNetsfiFTFLEFAAnETVRHGCLRLNQPTHVnNGNYTLA--ANPFGQASASIMAAFMDNPfefn-</p> <p><b>BLAST:</b> aliSize=23 (resi) iden=13.54% (13/96) simi=23.96% (23/96)<br/> vsdvprdievvaVtptSALISWDAPavtir-----YIRLTYGETGGNSPVQEIITLPGSKSTYITISGLKPGTDYTVLISVTVGRGDSPPASSKPASINFRTEI-----skpasinfrtei<br/> -----vsfpasvqlhtaveEMHhwipfsvdgqpapslrwlfnsgsvlnetsFTFLEFAANETVRHGCLRLNQPTHVNGNYTLAANPFGQASASImaafmdnpfefn-----</p> <p><b>Proposed:</b> aliSize=78 (resi) RMSD=2.90 (Å)<br/> -VSDVpRIEIVAVTPT--saLISWDAPaVTIRYIRLTYGeT-ggnSPVQEI-----tL-----pgSKSTYITISGLKPGT-DYTVLISVTVGrgdspASSKPASINFRTEI-----<br/> vSFPa-SVQLHTAVEMHhw--CI-PFSVD-GQPAPSLRWLFN-g----SILNEtsfiF-Teflepaanetv--RHGCLRLNQ-THVnNGNYTLAANP-----FGQASASIMAAFMDnpfefn</p>                                                                                       |
| 742 | <p>1f0vA<br/>(124)</p> <hr/> <p>3bcpA<br/>(124)</p> | N | 74.19 | <p><b>TM-align:</b> aliSize=92 (resi) RMSD=1.15 (Å)<br/> ketaaakferqhmdsstsaa-----SSSNYCNQMMksRNLTKDRCKPVNTFVHESLADVQAVCSQKNACKNGOTNCYQSYSTMSITDCRETGSSKYPNCAYKTTQANKHIIVACENPYVPVHFDASv-----<br/> -----kesaakferqhmdsgnsasSSSNYCNQMM--RKMTQGKCKPVNTFVHESLADVQAVCSQKNACKNGOTNCYQSKSTMRIIDCRETGSSKYPNCAYKTTQVEKHIIVACGGKPSVPVHFDASv-----</p> <p><b>SARST:</b> aliSize=120 (resi) RMSD=16.64 (Å)<br/> k-ETAAAKFERQHMDsSTsaASSSNYCNQMMksRNLTKDRCKPVNTFVHESLADVQAVCSQKNACKNGOTNCYQSYSTMSITDCRETGSSKYPNCAYKTTQANKHIIVACENPYVPVHFDASv--<br/> -kESAAAKFERQHMDSGN--SASSSNYCNQMMRKMTQGKCKPVNTFVHESLADVQAVCSQKNACKNGOTNCYQSKSTMRIIDCRETGSSKYPNCAYKTTQVEKHIIVACGGKPSVPVHFDASv--</p> <p><b>BLAST:</b> aliSize=109 (resi) iden=83.61% (102/124) simi=89.34% (109/124)<br/> KETAAAKFERQHMDsSTsaASSSNYCNQMMksRNLTKDRCKPVNTFVHESLADVQAVCSQKNACKNGOTNCYQSYSTMSITDCRETGSSKYPNCAYKTTQANKHIIVACENPYVPVHFDASv<br/> KESAAAKFERQHMDSGNSASSSNYCNQMM--RKMTQGKCKPVNTFVHESLADVQAVCSQKNACKNGOTNCYQSKSTMRIIDCRETGSSKYPNCAYKTTQVEKHIIVACGGKPSVPVHFDASv</p> <p><b>Proposed:</b> aliSize=113 (resi) RMSD=1.04 (Å)<br/> KETAaAKFERQHMDsSTsaASSSNYCNQMMksRNLTKDRCKPVNTFVHESLADVQAVCSQKNACKNGOTNCYQSYSTMSITDCRETGSSKYPNCAYKTTQANKHIIVACENPYVPVHFDASv-----<br/> KESAAAKFERQHMDSGNSASSSNYCNQMMYRKMTQGKCKPVNTFVHESLADVQAVCSQKNACKNGOTNCYQSKSTMRIIDCRETGSSKYPNCAYKTTQVEKHIIVACGGKPSVPVHFDASv-----</p>           |
| 743 | <p>1f0vA<br/>(124)</p> <hr/> <p>3bcpA<br/>(124)</p> | C | 69.35 | <p><b>TM-align:</b> aliSize=92 (resi) RMSD=1.15 (Å)<br/> ketaaakferqhmdsstsaa-----SSSNYCNQMMksRNLTKDRCKPVNTFVHESLADVQAVCSQKNACKNGOTNCYQSYSTMSITDCRETGSSKYPNCAYKTTQANKHIIVACENPYVPVHFDASv-----<br/> -----kesaakferqhmdsgnsasSSSNYCNQMM--RKMTQGKCKPVNTFVHESLADVQAVCSQKNACKNGOTNCYQSKSTMRIIDCRETGSSKYPNCAYKTTQVEKHIIVACGGKPSVPVHFDASv-----</p> <p><b>SARST:</b> aliSize=120 (resi) RMSD=16.64 (Å)<br/> k-ETAAAKFERQHMDsSTsaASSSNYCNQMMksRNLTKDRCKPVNTFVHESLADVQAVCSQKNACKNGOTNCYQSYSTMSITDCRETGSSKYPNCAYKTTQANKHIIVACENPYVPVHFDASv--<br/> -kESAAAKFERQHMDSGN--SASSSNYCNQMMRKMTQGKCKPVNTFVHESLADVQAVCSQKNACKNGOTNCYQSKSTMRIIDCRETGSSKYPNCAYKTTQVEKHIIVACGGKPSVPVHFDASv--</p> <p><b>BLAST:</b> aliSize=109 (resi) iden=83.61% (102/124) simi=89.34% (109/124)<br/> KETAAAKFERQHMDsSTsaASSSNYCNQMMksRNLTKDRCKPVNTFVHESLADVQAVCSQKNACKNGOTNCYQSYSTMSITDCRETGSSKYPNCAYKTTQANKHIIVACENPYVPVHFDASv<br/> KESAAAKFERQHMDSGNSASSSNYCNQMM--RKMTQGKCKPVNTFVHESLADVQAVCSQKNACKNGOTNCYQSKSTMRIIDCRETGSSKYPNCAYKTTQVEKHIIVACGGKPSVPVHFDASv</p> <p><b>Proposed:</b> aliSize=104 (resi) RMSD=0.83 (Å)<br/> ketaaakferqhmdsstsaa-----SSSNYCNQMMksRNLTKDRCKPVNTFVHESLADVQAVCSQKNACKNGOTNCYQSYSTMSITDCRETGSSKYPNCAYKTTQANKHIIVACENPYVPVHFDASv-----<br/> -----kesaakferqhmdsgnsasSSSNYCNQMMYRKMTQGKCKPVNTFVHESLADVQAVCSQKNACKNGOTNCYQSKSTMRIIDCRETGSSKYPNCAYKTTQVEKHIIVACGGKPSVPVHFDASv-----</p> |



|     |                                               |   |       |                                                                                                                                                                                                                                                                                                                                                                                                                                                                                                                                                                                                                                                                                                                                                                                                                                                                                                                                                                                                                                                                                                                                                                                                                                                                                                                                                                                            |
|-----|-----------------------------------------------|---|-------|--------------------------------------------------------------------------------------------------------------------------------------------------------------------------------------------------------------------------------------------------------------------------------------------------------------------------------------------------------------------------------------------------------------------------------------------------------------------------------------------------------------------------------------------------------------------------------------------------------------------------------------------------------------------------------------------------------------------------------------------------------------------------------------------------------------------------------------------------------------------------------------------------------------------------------------------------------------------------------------------------------------------------------------------------------------------------------------------------------------------------------------------------------------------------------------------------------------------------------------------------------------------------------------------------------------------------------------------------------------------------------------------|
| 744 | <p>1f0vA<br/>(124)</p> <p>3bcoA<br/>(124)</p> | N | 74.19 | <p>TM-align: aliSize=94 (resi) RMSD=1.16 (Å)<br/> ketaaakferqhmdsstaa-----SSSNYCNQMMKSRNLTKDRCKPVNTFVHESLADVQAVCSQKNVACKNGOTNCYQSYSTMSITDCRETGSSKYPNCAYKTTQANKHIIVACEGNFYVPVHFDASV-----<br/> -----kesaaakferqhmdsgnsasSSSNYCNQMMCCRKMTQGGKCKPVNTFVHESLADVQAVCSQKNVACKNGOTNCYQSKSTMRIIDCRETGSSKYPNCAYKTTQVEKHIIVACGGKPSVPVHFDASV-----svpvhfdasv</p> <p>SARST: aliSize=121 (resi) RMSD=12.72 (Å)<br/> k-ETAAAKFERQHMDsTSAASS-SNYCNQMMKSRNLTKDRCKPVNTFVHESLADVQAVCSQKNVACKNGOTNCYQSYSTMSITDCRETGSSKYPNCAYKTTQANKHIIVACEGNFYVPVHFDASV-v<br/> -kESAAAKFERQHMDS-GNSASSsSNYCNQMMCCRKMTQGGKCKPVNTFVHESLADVQAVCSQKNVACKNGOTNCYQSKSTMRIIDCRETGSSKYPNCAYKTTQVEKHIIVACGGKPSVPVHFDASV-v</p> <p>BLAST: aliSize=109 (resi) iden=82.26% (102/124) simi=87.90% (109/124)<br/> KETAAAKFERQHMDSSTSAASSSNYCNQMMKSRNLTKDRCKPVNTFVHESLADVQAVCSQKNVACKNGOTNCYQSYSTMSITDCRETGSSKYPNCAYKTTQANKHIIVACEGNFYVPVHFDASV<br/> KESAAAKFERQHMDSGNSASSSNYCNQMMCCRKMTQGGKCKPVNTFVHESLADVQAVCSQKNVACKNGOTNCYQSKSTMRIIDCRETGSSKYPNCAYKTTQVEKHIIVACGGKPSVPVHFDASV</p> <p>Proposed: aliSize=113 (resi) RMSD=0.91 (Å)<br/> KETAAAKFERQHMDSSTSAASSSNYCNQMMKSRNLTKDRCKPVNTFVHESLADVQAVCSQKNVACKNGOTNCYQSYSTMSITDCRETGSSKYPNCAYKTTQANKHIIVACEGNFYVPVHFDASV-----pyvpvhfdasv<br/> KESAAAKFERQHMDSGNSASSSNYCNQMMCCRKMTQGGKCKPVNTFVHESLADVQAVCSQKNVACKNGOTNCYQSKSTMRIIDCRETGSSKYPNCAYKTTQVEKHIIVACGGKPSVPVHFDASV-----psvpvhfdasv-----</p> |
| 745 | <p>1f0vA<br/>(124)</p> <p>3bcoA<br/>(124)</p> | C | 69.35 | <p>TM-align: aliSize=94 (resi) RMSD=1.16 (Å)<br/> ketaaakferqhmdsstaa-----SSSNYCNQMMKSRNLTKDRCKPVNTFVHESLADVQAVCSQKNVACKNGOTNCYQSYSTMSITDCRETGSSKYPNCAYKTTQANKHIIVACEGNFYVPVHFDASV-----<br/> -----kesaaakferqhmdsgnsasSSSNYCNQMMCCRKMTQGGKCKPVNTFVHESLADVQAVCSQKNVACKNGOTNCYQSKSTMRIIDCRETGSSKYPNCAYKTTQVEKHIIVACGGKPSVPVHFDASV-----svpvhfdasv</p> <p>SARST: aliSize=121 (resi) RMSD=12.72 (Å)<br/> k-ETAAAKFERQHMDsTSAASS-SNYCNQMMKSRNLTKDRCKPVNTFVHESLADVQAVCSQKNVACKNGOTNCYQSYSTMSITDCRETGSSKYPNCAYKTTQANKHIIVACEGNFYVPVHFDASV-v<br/> -kESAAAKFERQHMDS-GNSASSsSNYCNQMMCCRKMTQGGKCKPVNTFVHESLADVQAVCSQKNVACKNGOTNCYQSKSTMRIIDCRETGSSKYPNCAYKTTQVEKHIIVACGGKPSVPVHFDASV-v</p> <p>BLAST: aliSize=109 (resi) iden=82.26% (102/124) simi=87.90% (109/124)<br/> KETAAAKFERQHMDSSTSAASSSNYCNQMMKSRNLTKDRCKPVNTFVHESLADVQAVCSQKNVACKNGOTNCYQSYSTMSITDCRETGSSKYPNCAYKTTQANKHIIVACEGNFYVPVHFDASV<br/> KESAAAKFERQHMDSGNSASSSNYCNQMMCCRKMTQGGKCKPVNTFVHESLADVQAVCSQKNVACKNGOTNCYQSKSTMRIIDCRETGSSKYPNCAYKTTQVEKHIIVACGGKPSVPVHFDASV</p> <p>Proposed: aliSize=104 (resi) RMSD=0.83 (Å)<br/> ketaaakferqhmdsstaa-----SSSNYCNQMMKSRNLTKDRCKPVNTFVHESLADVQAVCSQKNVACKNGOTNCYQSYSTMSITDCRETGSSKYPNCAYKTTQANKHIIVACEGNFYVPVHFDASV-----<br/> -----kesaaakferqhmdsgnsasSSSNYCNQMMCCRKMTQGGKCKPVNTFVHESLADVQAVCSQKNVACKNGOTNCYQSKSTMRIIDCRETGSSKYPNCAYKTTQVEKHIIVACGGKPSVPVHFDASV-----</p>                  |
| 746 | <p>1f0vA<br/>(124)</p> <p>3bcmA<br/>(119)</p> | C | 83.19 | <p>TM-align: aliSize=109 (resi) RMSD=0.96 (Å)<br/> KETAAAKFERQHMDSsTsaasSSNYCNQMMKSRNLTKDRCKPVNTFVHESLADVQAVCSQKNVACKNGOTNCYQSYSTMSITDCRETGSSKYPNCAYKTTQANKHIIVACEGNFYVPVHFDASV-----<br/> KESAAAKFERQHMDS-G----SSNYCNQMMCCRKMTQGGKCKPVNTFVHESLADVQAVCSQKNVACKNGOTNCYQSKSTMRIIDCRETGSSKYPNCAYKTTQVEKHIIVACGGKPSVPVHFDASV-----svpvhfdasv</p> <p>SARST: aliSize=117 (resi) RMSD=9.20 (Å)<br/> k-ETAAAKFERQHMDsstsaASSSNYCNQMMKSRNLTKDRCKPVNTFVHESLADVQAVCSQKNVACKNGOTNCYQSYSTMSITDCRETGSSKYPNCAYKTTQANKHIIVACEGNFYVPVHFDASV-v<br/> -kESAAAKFERQHMD-----SGSSNYCNQMMCCRKMTQGGKCKPVNTFVHESLADVQAVCSQKNVACKNGOTNCYQSKSTMRIIDCRETGSSKYPNCAYKTTQVEKHIIVACGGKPSVPVHFDASV-v</p> <p>BLAST: aliSize=105 (resi) iden=83.19% (99/119) simi=88.24% (105/119)<br/> KETAAAKFERQHMDSsTsaasSSNYCNQMMKSRNLTKDRCKPVNTFVHESLADVQAVCSQKNVACKNGOTNCYQSYSTMSITDCRETGSSKYPNCAYKTTQANKHIIVACEGNFYVPVHFDASV<br/> KESAAAKFERQHMDSG-----SSNYCNQMMCCRKMTQGGKCKPVNTFVHESLADVQAVCSQKNVACKNGOTNCYQSKSTMRIIDCRETGSSKYPNCAYKTTQVEKHIIVACGGKPSVPVHFDASV</p> <p>Proposed: aliSize=119 (resi) RMSD=0.59 (Å)<br/> KETAAAKFERQHMDSsTsaasSSNYCNQMMKSRNLTKDRCKPVNTFVHESLADVQAVCSQKNVACKNGOTNCYQSYSTMSITDCRETGSSKYPNCAYKTTQANKHIIVACEGNFYVPVHFDASV-----<br/> KESAAAKFERQHMDS-G----SSNYCNQMMCCRKMTQGGKCKPVNTFVHESLADVQAVCSQKNVACKNGOTNCYQSKSTMRIIDCRETGSSKYPNCAYKTTQVEKHIIVACGGKPSVPVHFDASV-----</p>                                     |

|     |                                                     |   |       |                                                                                                                                                                                                                                                                                                                                                                                                                                                                                                                                                                                                                                                                                                                                                                                                                                                                                                                                                                                                                                                                                                                                                                                                                                                                                                                                                                                                    |
|-----|-----------------------------------------------------|---|-------|----------------------------------------------------------------------------------------------------------------------------------------------------------------------------------------------------------------------------------------------------------------------------------------------------------------------------------------------------------------------------------------------------------------------------------------------------------------------------------------------------------------------------------------------------------------------------------------------------------------------------------------------------------------------------------------------------------------------------------------------------------------------------------------------------------------------------------------------------------------------------------------------------------------------------------------------------------------------------------------------------------------------------------------------------------------------------------------------------------------------------------------------------------------------------------------------------------------------------------------------------------------------------------------------------------------------------------------------------------------------------------------------------|
| 747 | <p>1f0vA<br/>(124)</p> <hr/> <p>1r5cA<br/>(124)</p> | N | 72.58 | <p><b>TM-align:</b> aliSize=95 (resi)      RMSD=1.64 (Å)<br/> ketaaakferqhmdsstaa-----SSSNYCNQMMKSRNLTKDRCKPVNTFVHESLADVQAVCSQKNACKNGOTNCYQSYSTMSITDCRETGSSKYPNCAYKTTQANKHIIVACEINFYvpvhfdasv-----<br/> -----kesaakferqhmdsgnspssSSSNYCNLMCCRKMTQKCKPVNTFVHESLADVQAVCSQKNACKNGOTNCYQSKSTMRIIDCRETGSSKYPNCAYKTTQVEKHIIVACGGKPS-----vpvhfdasv</p> <p><b>SARST:</b>      aliSize=121 (resi)      RMSD=12.83 (Å)<br/> k-ETAAAKFERQHMDs-STSAASsSNYCNQMMKSRNLTKDRCKPVNTFVHESLADVQAVCSQKNACKNGOTNCYQSYSTMSITDCRETGSSKYPNCAYKTTQANKHIIVACEINFYVPVHFDAS-v<br/> -kESAAAKFERQHMDsgNSPSSS-SNYCNLMCCRKMTQKCKPVNTFVHESLADVQAVCSQKNACKNGOTNCYQSKSTMRIIDCRETGSSKYPNCAYKTTQVEKHIIVACGGKPSVPVHFDASv-</p> <p><b>BLAST:</b>      aliSize=107 (resi)      iden=81.45% (101/124)      simi=86.29% (107/124)<br/> KETAAAKFERQHMDsstaaSSSNYCNQMMKSRNLTKDRCKPVNTFVHESLADVQAVCSQKNACKNGOTNCYQSYSTMSITDCRETGSSKYPNCAYKTTQANKHIIVACEINFYVPVHFDASV<br/> KESAAAKFERQHMDsgNSPSSS-SNYCNLMCCRKMTQKCKPVNTFVHESLADVQAVCSQKNACKNGOTNCYQSKSTMRIIDCRETGSSKYPNCAYKTTQVEKHIIVACGGKPSVPVHFDASV</p> <p><b>Proposed:</b> aliSize=112 (resi)      RMSD=0.84 (Å)<br/> KETAAAKFERQHMDsstaa-ASSSNYCNQMMKSRNLTKDRCKPVNTFVHESLADVQAVCSQKNACKNGOTNCYQSYSTMSITDCRETGSSKYPNCAYKTTQANKHIIVACEIN-----pyvpvhfdasv<br/> KESAAAKFERQHMDs-GNSpSSSNYCNLMCCRKMTQKCKPVNTFVHESLADVQAVCSQKNACKNGOTNCYQSKSTMRIIDCRETGSSKYPNCAYKTTQVEKHIIVACGGKPSvpvhfdasv-----</p> |
| 748 | <p>1f0vA<br/>(124)</p> <hr/> <p>1r5cA<br/>(124)</p> | C | 68.55 | <p><b>TM-align:</b> aliSize=95 (resi)      RMSD=1.64 (Å)<br/> ketaaakferqhmdsstaa-----SSSNYCNQMMKSRNLTKDRCKPVNTFVHESLADVQAVCSQKNACKNGOTNCYQSYSTMSITDCRETGSSKYPNCAYKTTQANKHIIVACEINFYvpvhfdasv-----<br/> -----kesaakferqhmdsgnspssSSSNYCNLMCCRKMTQKCKPVNTFVHESLADVQAVCSQKNACKNGOTNCYQSKSTMRIIDCRETGSSKYPNCAYKTTQVEKHIIVACGGKPS-----vpvhfdasv</p> <p><b>SARST:</b>      aliSize=121 (resi)      RMSD=12.83 (Å)<br/> k-ETAAAKFERQHMDs-STSAASsSNYCNQMMKSRNLTKDRCKPVNTFVHESLADVQAVCSQKNACKNGOTNCYQSYSTMSITDCRETGSSKYPNCAYKTTQANKHIIVACEINFYVPVHFDAS-v<br/> -kESAAAKFERQHMDsgNSPSSS-SNYCNLMCCRKMTQKCKPVNTFVHESLADVQAVCSQKNACKNGOTNCYQSKSTMRIIDCRETGSSKYPNCAYKTTQVEKHIIVACGGKPSVPVHFDASv-</p> <p><b>BLAST:</b>      aliSize=107 (resi)      iden=81.45% (101/124)      simi=86.29% (107/124)<br/> KETAAAKFERQHMDsstaaSSSNYCNQMMKSRNLTKDRCKPVNTFVHESLADVQAVCSQKNACKNGOTNCYQSYSTMSITDCRETGSSKYPNCAYKTTQANKHIIVACEINFYVPVHFDASV<br/> KESAAAKFERQHMDsgNSPSSS-SNYCNLMCCRKMTQKCKPVNTFVHESLADVQAVCSQKNACKNGOTNCYQSKSTMRIIDCRETGSSKYPNCAYKTTQVEKHIIVACGGKPSVPVHFDASV</p> <p><b>Proposed:</b> aliSize=103 (resi)      RMSD=0.65 (Å)<br/> ketaaakferqhmdsstaaSSSNYCNQMMKSRNLTKDRCKPVNTFVHESLADVQAVCSQKNACKNGOTNCYQSYSTMSITDCRETGSSKYPNCAYKTTQANKHIIVACEINFYVPVHFDASV<br/> -----kesaakferqhmdsgnspssSSSNYCNLMCCRKMTQKCKPVNTFVHESLADVQAVCSQKNACKNGOTNCYQSKSTMRIIDCRETGSSKYPNCAYKTTQVEKHIIVACGGKPSVPVHFDASV</p>        |
| 749 | <p>1f0vA<br/>(124)</p> <hr/> <p>1lbgA<br/>(124)</p> | N | 73.39 | <p><b>TM-align:</b> aliSize=94 (resi)      RMSD=1.06 (Å)<br/> ketaaakferqhmdsstaa-----SSSNYCNQMMKSRNLTKDRCKPVNTFVHESLADVQAVCSQKNACKNGOTNCYQSYSTMSITDCRETGSSKYPNCAYKTTQANKHIIVACEINFYvpvhfdasv-----<br/> -----kesaakferqhmdsgnspssSSSNYCNLMCCRKMTQKCKPVNTFVHESLADVQAVCSQKNACKNGOTNCYQSKSTMRIIDCRETGSSKYPNCAYKTTQVEKHIIVACGGKPS-----svpvhfdasv</p> <p><b>SARST:</b>      aliSize=121 (resi)      RMSD=12.88 (Å)<br/> k-ETAAAKFERQHMDs-STSAASsSNYCNQMMKSRNLTKDRCKPVNTFVHESLADVQAVCSQKNACKNGOTNCYQSYSTMSITDCRETGSSKYPNCAYKTTQANKHIIVACEINFYVPVHFDAS-v<br/> -kESAAAKFERQHMDsgNSPSSS-SNYCNLMCCRKMTQKCKPVNTFVHESLADVQAVCSQKNACKNGOTNCYQSKSTMRIIDCRETGSSKYPNCAYKTTQVEKHIIVACGGKPSVPVHFDASv-</p> <p><b>BLAST:</b>      aliSize=107 (resi)      iden=81.45% (101/124)      simi=86.29% (107/124)<br/> KETAAAKFERQHMDsstaaSSSNYCNQMMKSRNLTKDRCKPVNTFVHESLADVQAVCSQKNACKNGOTNCYQSYSTMSITDCRETGSSKYPNCAYKTTQANKHIIVACEINFYVPVHFDASV<br/> KESAAAKFERQHMDsgNSPSSS-SNYCNLMCCRKMTQKCKPVNTFVHESLADVQAVCSQKNACKNGOTNCYQSKSTMRIIDCRETGSSKYPNCAYKTTQVEKHIIVACGGKPSVPVHFDASV</p> <p><b>Proposed:</b> aliSize=113 (resi)      RMSD=0.93 (Å)<br/> KETAAAKFERQHMDsstaa-ASSSNYCNQMMKSRNLTKDRCKPVNTFVHESLADVQAVCSQKNACKNGOTNCYQSYSTMSITDCRETGSSKYPNCAYKTTQANKHIIVACEIN-----yvpvhfdasv<br/> KESAAAKFERQHMDs-GNSpSSSNYCNLMCCRKMTQKCKPVNTFVHESLADVQAVCSQKNACKNGOTNCYQSKSTMRIIDCRETGSSKYPNCAYKTTQVEKHIIVACGGKPSvpvhfdasv-----</p> |

|     |                                                     |   |       |                                                                                                                                                                                                                                                                                                                                                                                                                                                                                                                                                                                                                                                                                                                                                                                                                                                                                                                                                                                                                                                                                                                                                                                                                                                                                                                                                    |
|-----|-----------------------------------------------------|---|-------|----------------------------------------------------------------------------------------------------------------------------------------------------------------------------------------------------------------------------------------------------------------------------------------------------------------------------------------------------------------------------------------------------------------------------------------------------------------------------------------------------------------------------------------------------------------------------------------------------------------------------------------------------------------------------------------------------------------------------------------------------------------------------------------------------------------------------------------------------------------------------------------------------------------------------------------------------------------------------------------------------------------------------------------------------------------------------------------------------------------------------------------------------------------------------------------------------------------------------------------------------------------------------------------------------------------------------------------------------|
| 750 | <p>1f0vA<br/>(124)</p> <hr/> <p>1lbgA<br/>(124)</p> | C | 69.35 | <p><b>TM-align:</b> aliSize=94 (resi) RMSD=1.06 (Å)<br/> ketaaakferqhmdsstsa-----SSSNYCNQMMKSRNLTkDRCKPVNTFVHESLADVQAVCSQKNACKNGOTNCYQSYSTMSITDCRETGSSKYPNCAYKTTQANKHIIVACENPYVpvhfdasv-----<br/> -----kesaaakferqhmdsgnspSSSNYCNLMCCRKMTQKCKPVNTFVHESLADVQAVCSQKNACKNGOTNCYQSKSTMRIIDCRETGSSKYPNCAYKTTQVEKHIIVACGKPSVpvhfdasv</p> <p><b>SARST:</b> aliSize=121 (resi) RMSD=12.88 (Å)<br/> k-ETAAAKFEROHMDSSTSAASsSNYCNQMMKSRNLTkDRCKPVNTFVHESLADVQAVCSQKNACKNGOTNCYQSYSTMSITDCRETGSSKYPNCAYKTTQANKHIIVACENPYVpvhfdasv-v<br/> -kESAAAKFEROHMDSgNSPSSsSNYCNLMCCRKMTQKCKPVNTFVHESLADVQAVCSQKNACKNGOTNCYQSKSTMRIIDCRETGSSKYPNCAYKTTQVEKHIIVACGKPSVpvhfdasv-v</p> <p><b>BLAST:</b> aliSize=107 (resi) iden=81.45% (101/124) simi=86.29% (107/124)<br/> kETAAAKFEROHMDSSTSAASSSSNYCNQMMKSRNLTkDRCKPVNTFVHESLADVQAVCSQKNACKNGOTNCYQSYSTMSITDCRETGSSKYPNCAYKTTQANKHIIVACENPYVpvhfdasv<br/> kESAAAKFEROHMDSGNSPSSSSSNYCNLMCCRKMTQKCKPVNTFVHESLADVQAVCSQKNACKNGOTNCYQSKSTMRIIDCRETGSSKYPNCAYKTTQVEKHIIVACGKPSVpvhfdasv</p> <p><b>Proposed:</b> aliSize=104 (resi) RMSD=0.82 (Å)<br/> ketaaakferqhmdsstsa-----SSSNYCNQMMKSRNLTkDRCKPVNTFVHESLADVQAVCSQKNACKNGOTNCYQSYSTMSITDCRETGSSKYPNCAYKTTQANKHIIVACENPYVpvhfdasv<br/> -----kesaaakferqhmdsgnspSSSNYCNLMCCRKMTQKCKPVNTFVHESLADVQAVCSQKNACKNGOTNCYQSKSTMRIIDCRETGSSKYPNCAYKTTQVEKHIIVACGKPSVpvhfdasv</p>   |
| 751 | <p>1f0vA<br/>(124)</p> <hr/> <p>1tq9A<br/>(124)</p> | N | 73.39 | <p><b>TM-align:</b> aliSize=93 (resi) RMSD=1.26 (Å)<br/> ketaaakferqhmdsstsa-----ASSSNYCNQMMKSRNLTkDRCKPVNTFVHESLADVQAVCSQKNACKNGOTNCYQSYSTMSITDCRETGSSKYPNCAYKTTQANKHIIVACENPYVpvhfdasv-----<br/> -----kesaaakferqhmdsgnspSSSNYCNLMCCRKMTQKCKPVNTFVHESLADVQAVCSQKNACKNGOTNCYQSKSTMRIIDCRETGSSKYPNCAYKTTQVEKHIIVACGKPSVpvhfdasv</p> <p><b>SARST:</b> aliSize=119 (resi) RMSD=13.97 (Å)<br/> k-ETAAAKFEROHMDSSTSAASsSNYCNQMMKSRNLTkDRCKPVNTFVHESLADVQAVCSQKNACKNGOTNCYQSYSTMSITDCRETGSSKYPNCAYKTTQANKHIIVACENPYVpvhfdasv-v<br/> -kESAAAKFEROHMDSGN-SPSSsSNYCNLMCCRKMTQKCKPVNTFVHESLADVQAVCSQKNACKNGOTNCYQSKSTMRIIDCRETGSSKYPNCAYKTTQVEKHIIVACGKPSVpvhfdasv-v</p> <p><b>BLAST:</b> aliSize=107 (resi) iden=82.79% (101/124) simi=87.70% (107/124)<br/> kETAAAKFEROHMDSSTSAASSSSNYCNQMMKSRNLTkDRCKPVNTFVHESLADVQAVCSQKNACKNGOTNCYQSYSTMSITDCRETGSSKYPNCAYKTTQANKHIIVACENPYVpvhfdasv<br/> kESAAAKFEROHMDSGNSPSSSSSNYCNLMCCRKMTQKCKPVNTFVHESLADVQAVCSQKNACKNGOTNCYQSKSTMRIIDCRETGSSKYPNCAYKTTQVEKHIIVACGKPSVpvhfdasv</p> <p><b>Proposed:</b> aliSize=113 (resi) RMSD=0.93 (Å)<br/> kETAAAKFEROHMDSSTSAASsSNYCNQMMKSRNLTkDRCKPVNTFVHESLADVQAVCSQKNACKNGOTNCYQSYSTMSITDCRETGSSKYPNCAYKTTQANKHIIVACENPYVpvhfdasv<br/> kESAAAKFEROHMDSGN-SPSSsSNYCNLMCCRKMTQKCKPVNTFVHESLADVQAVCSQKNACKNGOTNCYQSKSTMRIIDCRETGSSKYPNCAYKTTQVEKHIIVACGKPSVpvhfdasv-----</p>   |
| 752 | <p>1f0vA<br/>(124)</p> <hr/> <p>1tq9A<br/>(124)</p> | C | 69.35 | <p><b>TM-align:</b> aliSize=93 (resi) RMSD=1.26 (Å)<br/> ketaaakferqhmdsstsa-----ASSSNYCNQMMKSRNLTkDRCKPVNTFVHESLADVQAVCSQKNACKNGOTNCYQSYSTMSITDCRETGSSKYPNCAYKTTQANKHIIVACENPYVpvhfdasv-----<br/> -----kesaaakferqhmdsgnspSSSNYCNLMCCRKMTQKCKPVNTFVHESLADVQAVCSQKNACKNGOTNCYQSKSTMRIIDCRETGSSKYPNCAYKTTQVEKHIIVACGKPSVpvhfdasv</p> <p><b>SARST:</b> aliSize=119 (resi) RMSD=13.97 (Å)<br/> k-ETAAAKFEROHMDSSTSAASsSNYCNQMMKSRNLTkDRCKPVNTFVHESLADVQAVCSQKNACKNGOTNCYQSYSTMSITDCRETGSSKYPNCAYKTTQANKHIIVACENPYVpvhfdasv-v<br/> -kESAAAKFEROHMDSGN-SPSSsSNYCNLMCCRKMTQKCKPVNTFVHESLADVQAVCSQKNACKNGOTNCYQSKSTMRIIDCRETGSSKYPNCAYKTTQVEKHIIVACGKPSVpvhfdasv-v</p> <p><b>BLAST:</b> aliSize=107 (resi) iden=82.79% (101/124) simi=87.70% (107/124)<br/> kETAAAKFEROHMDSSTSAASSSSNYCNQMMKSRNLTkDRCKPVNTFVHESLADVQAVCSQKNACKNGOTNCYQSYSTMSITDCRETGSSKYPNCAYKTTQANKHIIVACENPYVpvhfdasv<br/> kESAAAKFEROHMDSGNSPSSSSSNYCNLMCCRKMTQKCKPVNTFVHESLADVQAVCSQKNACKNGOTNCYQSKSTMRIIDCRETGSSKYPNCAYKTTQVEKHIIVACGKPSVpvhfdasv</p> <p><b>Proposed:</b> aliSize=104 (resi) RMSD=0.66 (Å)<br/> ketaaakferqhmdsstsa-----SSSNYCNQMMKSRNLTkDRCKPVNTFVHESLADVQAVCSQKNACKNGOTNCYQSYSTMSITDCRETGSSKYPNCAYKTTQANKHIIVACENPYVpvhfdasv<br/> -----kesaaakferqhmdsgnspSSSNYCNLMCCRKMTQKCKPVNTFVHESLADVQAVCSQKNACKNGOTNCYQSKSTMRIIDCRETGSSKYPNCAYKTTQVEKHIIVACGKPSVpvhfdasv</p> |

|     |                                             |   |                                                                                                                                                                                                                                                                                                                                                                                                                                                                                                                                                                                                                                                                                                                                                                                                                                                                                                                                                                                                                                                                                                                                                                                                                                                                                                                                                                                 |
|-----|---------------------------------------------|---|---------------------------------------------------------------------------------------------------------------------------------------------------------------------------------------------------------------------------------------------------------------------------------------------------------------------------------------------------------------------------------------------------------------------------------------------------------------------------------------------------------------------------------------------------------------------------------------------------------------------------------------------------------------------------------------------------------------------------------------------------------------------------------------------------------------------------------------------------------------------------------------------------------------------------------------------------------------------------------------------------------------------------------------------------------------------------------------------------------------------------------------------------------------------------------------------------------------------------------------------------------------------------------------------------------------------------------------------------------------------------------|
| 753 | <p>1f0vA (124)</p> <hr/> <p>1r3mB (122)</p> | C | <p>81.15</p> <p><b>TM-align:</b> aliSize=112 (resi) RMSD=1.10 (Å)<br/> kETAAAKFERQHMDsTSAAsSSNYCNQMMKSRNLTkDRCKPVNTFVHESLADVQAVCSQKNVACKNGOTNCYQSYSTMSITDCRETGSSKYPNCAYKTTQANKHIIVACEGNFYvpvhfdasv-----<br/> kESAAAKFERQHMDs-GNSP--SSNYCNLMCCRKMTQKCKPVNTFVHESLADVKAVCSQKKVTCKNGOTNCYQSKSTMRIIDCRETGSSKYPNCAYKTTQVEKHIIVACGGKPS-----svpvhfdasv</p> <p><b>SARST:</b> aliSize=120 (resi) RMSD=9.01 (Å)<br/> k-ETAAAKFERQHMDsTSAAsSSNYCNQMMKSRNLTkDRCKPVNTFVHESLADVQAVCSQKNVACKNGOTNCYQSYSTMSITDCRETGSSKYPNCAYKTTQANKHIIVACEGNFYVPVHFDA--v<br/> -kESAAAKFERQHMD--SGNSPSSNYCNLMCCRKMTQKCKPVNTFVHESLADVKAVCSQKKVTCKNGOTNCYQSKSTMRIIDCRETGSSKYPNCAYKTTQVEKHIIVACGGKPSVPVHFDA--v</p> <p><b>BLAST:</b> aliSize=105 (resi) iden=81.97% (100/122) simi=86.07% (105/122)<br/> kETAAAKFERQHMDsTSAAsSSNYCNQMMKSRNLTkDRCKPVNTFVHESLADVQAVCSQKNVACKNGOTNCYQSYSTMSITDCRETGSSKYPNCAYKTTQANKHIIVACEGNFYVPVHFDA--v<br/> kESAAAKFERQHMDsGNSP--SSNYCNLMCCRKMTQKCKPVNTFVHESLADVKAVCSQKKVTCKNGOTNCYQSKSTMRIIDCRETGSSKYPNCAYKTTQVEKHIIVACGGKPSVPVHFDA--v</p> <p><b>Proposed:</b> aliSize=122 (resi) RMSD=0.79 (Å)<br/> kETAAAKFERQHMDsTSAAsSSNYCNQMMKSRNLTkDRCKPVNTFVHESLADVQAVCSQKNVACKNGOTNCYQSYSTMSITDCRETGSSKYPNCAYKTTQANKHIIVACEGNFYVPVHFDA--v<br/> kESAAAKFERQHMDs-GNSP--SSNYCNLMCCRKMTQKCKPVNTFVHESLADVKAVCSQKKVTCKNGOTNCYQSKSTMRIIDCRETGSSKYPNCAYKTTQVEKHIIVACGGKPSVPVHFDA--v</p>               |
| 754 | <p>1f0vA (124)</p> <hr/> <p>1r5dA (124)</p> | N | <p>72.58</p> <p><b>TM-align:</b> aliSize=95 (resi) RMSD=1.62 (Å)<br/> ketaaakferqhmdsstaa-----SSNYCNQMMKSRNLTkDRCKPVNTFVHESLADVQAVCSQKNVACKNGOTNCYQSYSTMSITDCRETGSSKYPNCAYKTTQANKHIIVACEGNFYvpvhfdasv-----<br/> -----kesaaakferqhmdsgnspSSNYCNLMCCRKMTQKCKPVNTFVHESLADVKAVCSQKKVTCKNGOTNCYQSKSTMRIIDCRETGSSKYPNCAYKTTQVEKHIIVACGGKPS-----vvpvhfdasv</p> <p><b>SARST:</b> aliSize=121 (resi) RMSD=12.84 (Å)<br/> k-ETAAAKFERQHMDsTSAAsSSNYCNQMMKSRNLTkDRCKPVNTFVHESLADVQAVCSQKNVACKNGOTNCYQSYSTMSITDCRETGSSKYPNCAYKTTQANKHIIVACEGNFYVPVHFDA--v<br/> -kESAAAKFERQHMDs-GNSPSSsSNYCNLMCCRKMTQKCKPVNTFVHESLADVKAVCSQKKVTCKNGOTNCYQSKSTMRIIDCRETGSSKYPNCAYKTTQVEKHIIVACGGKPSVPVHFDA--v</p> <p><b>BLAST:</b> aliSize=107 (resi) iden=81.45% (101/124) simi=86.29% (107/124)<br/> kETAAAKFERQHMDsstaaSSNYCNQMMKSRNLTkDRCKPVNTFVHESLADVQAVCSQKNVACKNGOTNCYQSYSTMSITDCRETGSSKYPNCAYKTTQANKHIIVACEGNFYVPVHFDA--v<br/> kESAAAKFERQHMDsgnspSSsSNYCNLMCCRKMTQKCKPVNTFVHESLADVKAVCSQKKVTCKNGOTNCYQSKSTMRIIDCRETGSSKYPNCAYKTTQVEKHIIVACGGKPSVPVHFDA--v</p> <p><b>Proposed:</b> aliSize=112 (resi) RMSD=0.84 (Å)<br/> kETAAAKFERQHMDsstaaSSNYCNQMMKSRNLTkDRCKPVNTFVHESLADVQAVCSQKNVACKNGOTNCYQSYSTMSITDCRETGSSKYPNCAYKTTQANKHIIVACEGNF-----pyvpvhfdasv<br/> kESAAAKFERQHMDs-GNSPSSsSNYCNLMCCRKMTQKCKPVNTFVHESLADVKAVCSQKKVTCKNGOTNCYQSKSTMRIIDCRETGSSKYPNCAYKTTQVEKHIIVACGGKPSvpvhfdasv-----</p> |
| 755 | <p>1f0vA (124)</p> <hr/> <p>1r5dA (124)</p> | C | <p>68.55</p> <p><b>TM-align:</b> aliSize=95 (resi) RMSD=1.62 (Å)<br/> ketaaakferqhmdsstaa-----SSNYCNQMMKSRNLTkDRCKPVNTFVHESLADVQAVCSQKNVACKNGOTNCYQSYSTMSITDCRETGSSKYPNCAYKTTQANKHIIVACEGNFYvpvhfdasv-----<br/> -----kesaaakferqhmdsgnspSSNYCNLMCCRKMTQKCKPVNTFVHESLADVKAVCSQKKVTCKNGOTNCYQSKSTMRIIDCRETGSSKYPNCAYKTTQVEKHIIVACGGKPS-----vvpvhfdasv</p> <p><b>SARST:</b> aliSize=121 (resi) RMSD=12.84 (Å)<br/> k-ETAAAKFERQHMDsTSAAsSSNYCNQMMKSRNLTkDRCKPVNTFVHESLADVQAVCSQKNVACKNGOTNCYQSYSTMSITDCRETGSSKYPNCAYKTTQANKHIIVACEGNFYVPVHFDA--v<br/> -kESAAAKFERQHMDs-GNSPSSsSNYCNLMCCRKMTQKCKPVNTFVHESLADVKAVCSQKKVTCKNGOTNCYQSKSTMRIIDCRETGSSKYPNCAYKTTQVEKHIIVACGGKPSVPVHFDA--v</p> <p><b>BLAST:</b> aliSize=107 (resi) iden=81.45% (101/124) simi=86.29% (107/124)<br/> kETAAAKFERQHMDsstaaSSNYCNQMMKSRNLTkDRCKPVNTFVHESLADVQAVCSQKNVACKNGOTNCYQSYSTMSITDCRETGSSKYPNCAYKTTQANKHIIVACEGNFYVPVHFDA--v<br/> kESAAAKFERQHMDsgnspSSsSNYCNLMCCRKMTQKCKPVNTFVHESLADVKAVCSQKKVTCKNGOTNCYQSKSTMRIIDCRETGSSKYPNCAYKTTQVEKHIIVACGGKPSVPVHFDA--v</p> <p><b>Proposed:</b> aliSize=103 (resi) RMSD=0.66 (Å)<br/> ketaaakferqhmdsstaa-----SSNYCNQMMKSRNLTkDRCKPVNTFVHESLADVQAVCSQKNVACKNGOTNCYQSYSTMSITDCRETGSSKYPNCAYKTTQANKHIIVACEGNFYVPVHFDA--v<br/> -----kesaaakferqhmdsgnspSSNYCNLMCCRKMTQKCKPVNTFVHESLADVKAVCSQKKVTCKNGOTNCYQSKSTMRIIDCRETGSSKYPNCAYKTTQVEKHIIVACGGKPSVPVHFDA--v</p>   |

|     |                                                                   |   |       |                                                                                                                                                                                                                                                                                                                                                                                                                                                                                                                                                                                                                                                                                                                                                                                                                                                                                                                                                                                                                                                                                                                                                                                                                                                                                                                                                                                                     |
|-----|-------------------------------------------------------------------|---|-------|-----------------------------------------------------------------------------------------------------------------------------------------------------------------------------------------------------------------------------------------------------------------------------------------------------------------------------------------------------------------------------------------------------------------------------------------------------------------------------------------------------------------------------------------------------------------------------------------------------------------------------------------------------------------------------------------------------------------------------------------------------------------------------------------------------------------------------------------------------------------------------------------------------------------------------------------------------------------------------------------------------------------------------------------------------------------------------------------------------------------------------------------------------------------------------------------------------------------------------------------------------------------------------------------------------------------------------------------------------------------------------------------------------|
| 756 | <p><b>1f0vA</b><br/>(124)</p> <hr/> <p><b>11baA</b><br/>(124)</p> | N | 72.58 | <p><b>TM-align:</b> aliSize=94 (resi) RMSD=1.21 (Å)<br/> ketaaakferqhmdsstsa-----SSSNYCNQMMKSRNLTKDRCKPVNTFVHESLADVQAVCSQKNVACKNGOTNCYQSYSTMSTDCRETGSSKYPNCAYKTTQANKHIIVACENFYVYPVHFDASV-----<br/> -----kesaaakferqhmdsgnspSSSNYCNLMCCRKMTQGKCKPVNTFVHESLADVKAVCSQKVTCKNGOTNCYQSKSTMRTDCRETGSSKYPNCAYKTTQVEKHIIVACGKPSVYPVHFDASV-----svpvhfdasv</p> <p><b>SARST:</b> aliSize=121 (resi) RMSD=12.89 (Å)<br/> k-ETAAAKFERQHMDsTSAASS-SNYCNQMMKSRNLTKDRCKPVNTFVHESLADVQAVCSQKNVACKNGOTNCYQSYSTMSTDCRETGSSKYPNCAYKTTQANKHIIVACENFYVYPVHFDASV-v<br/> -kESAAAKFERQHMDs-GNSPSSSNYCNLMCCRKMTQGKCKPVNTFVHESLADVKAVCSQKVTCKNGOTNCYQSKSTMRTDCRETGSSKYPNCAYKTTQVEKHIIVACGKPSVYPVHFDASV-v</p> <p><b>BLAST:</b> aliSize=107 (resi) iden=81.45% (101/124) simi=86.29% (107/124)<br/> KETAAAKFERQHMDsTSAASSSNYCNQMMKSRNLTKDRCKPVNTFVHESLADVQAVCSQKNVACKNGOTNCYQSYSTMSTDCRETGSSKYPNCAYKTTQANKHIIVACENFYVYPVHFDASV<br/> KESAAAKFERQHMDsGNSPSSSNYCNLMCCRKMTQGKCKPVNTFVHESLADVKAVCSQKVTCKNGOTNCYQSKSTMRTDCRETGSSKYPNCAYKTTQVEKHIIVACGKPSVYPVHFDASV</p> <p><b>Proposed:</b> aliSize=112 (resi) RMSD=0.75 (Å)<br/> KETAAAKFERQHMDsTSA-ASSSNYCNQMMKSRNLTKDRCKPVNTFVHESLADVQAVCSQKNVACKNGOTNCYQSYSTMSTDCRETGSSKYPNCAYKTTQANKHIIVACENFYVYPVHFDASV<br/> KESAAAKFERQHMDs-GNSpSSSNYCNLMCCRKMTQGKCKPVNTFVHESLADVKAVCSQKVTCKNGOTNCYQSKSTMRTDCRETGSSKYPNCAYKTTQVEKHIIVACGKPSVYPVHFDASV-----pyvpvhfdasv</p>                         |
| 757 | <p><b>1f0vA</b><br/>(124)</p> <hr/> <p><b>11baA</b><br/>(124)</p> | C | 68.55 | <p><b>TM-align:</b> aliSize=94 (resi) RMSD=1.21 (Å)<br/> ketaaakferqhmdsstsa-----SSSNYCNQMMKSRNLTKDRCKPVNTFVHESLADVQAVCSQKNVACKNGOTNCYQSYSTMSTDCRETGSSKYPNCAYKTTQANKHIIVACENFYVYPVHFDASV-----<br/> -----kesaaakferqhmdsgnspSSSNYCNLMCCRKMTQGKCKPVNTFVHESLADVKAVCSQKVTCKNGOTNCYQSKSTMRTDCRETGSSKYPNCAYKTTQVEKHIIVACGKPSVYPVHFDASV-----svpvhfdasv</p> <p><b>SARST:</b> aliSize=121 (resi) RMSD=12.89 (Å)<br/> k-ETAAAKFERQHMDsTSAASS-SNYCNQMMKSRNLTKDRCKPVNTFVHESLADVQAVCSQKNVACKNGOTNCYQSYSTMSTDCRETGSSKYPNCAYKTTQANKHIIVACENFYVYPVHFDASV-v<br/> -kESAAAKFERQHMDs-GNSPSSSNYCNLMCCRKMTQGKCKPVNTFVHESLADVKAVCSQKVTCKNGOTNCYQSKSTMRTDCRETGSSKYPNCAYKTTQVEKHIIVACGKPSVYPVHFDASV-v</p> <p><b>BLAST:</b> aliSize=107 (resi) iden=81.45% (101/124) simi=86.29% (107/124)<br/> KETAAAKFERQHMDsTSAASSSNYCNQMMKSRNLTKDRCKPVNTFVHESLADVQAVCSQKNVACKNGOTNCYQSYSTMSTDCRETGSSKYPNCAYKTTQANKHIIVACENFYVYPVHFDASV<br/> KESAAAKFERQHMDsGNSPSSSNYCNLMCCRKMTQGKCKPVNTFVHESLADVKAVCSQKVTCKNGOTNCYQSKSTMRTDCRETGSSKYPNCAYKTTQVEKHIIVACGKPSVYPVHFDASV</p> <p><b>Proposed:</b> aliSize=103 (resi) RMSD=0.55 (Å)<br/> ketaaakferqhmdsstsaas-----SSSNYCNQMMKSRNLTKDRCKPVNTFVHESLADVQAVCSQKNVACKNGOTNCYQSYSTMSTDCRETGSSKYPNCAYKTTQANKHIIVACENFYVYPVHFDASV<br/> -----kesaaakferqhmdsgnspSSSNYCNLMCCRKMTQGKCKPVNTFVHESLADVKAVCSQKVTCKNGOTNCYQSKSTMRTDCRETGSSKYPNCAYKTTQVEKHIIVACGKPSVYPVHFDASV</p>                               |
| 758 | <p><b>1r5cA</b><br/>(124)</p> <hr/> <p><b>1js0A</b><br/>(124)</p> | N | 72.58 | <p><b>TM-align:</b> aliSize=94 (resi) RMSD=1.43 (Å)<br/> kesaaakferqhmdsgnsp-----SSSNYCNLMCCRKMTQGKCKPVNTFVHESLADVKAVCSQKVTCKNGOTNCYQSKSTMRTDCRETGSSKYPNCAYKTTQVEKHIIVACGKPSVYPVHFDASV-----<br/> -----ketaaakferqhmdsstsaSSSNYCNQMMKSRNLTKDRCKPVNTFVHESLADVQAVCSQKNVACKNGOTNCYQSYSTMSTDCRETGSSKYPNCAYKTTQANKHIIVACENFYVYPVHFDASV-----yvpvhfdasv</p> <p><b>SARST:</b> aliSize=121 (resi) RMSD=11.44 (Å)<br/> k-ESAAAKFERQHMDsGNSPSS-SNYCNLMCCRKMTQGKCKPVNTFVHESLADVKAVCSQKVTCKNGOTNCYQSKSTMRTDCRETGSSKYPNCAYKTTQVEKHIIVACGKPSVYPVHFDASV-v<br/> -kETAAAKFERQHMDs-STSAASSSNYCNQMMKSRNLTKDRCKPVNTFVHESLADVQAVCSQKNVACKNGOTNCYQSYSTMSTDCRETGSSKYPNCAYKTTQANKHIIVACENFYVYPVHFDASV-v</p> <p><b>BLAST:</b> aliSize=107 (resi) iden=81.45% (101/124) simi=86.29% (107/124)<br/> KESAAAKFERQHMDsGNSPSSSNYCNLMCCRKMTQGKCKPVNTFVHESLADVKAVCSQKVTCKNGOTNCYQSKSTMRTDCRETGSSKYPNCAYKTTQVEKHIIVACGKPSVYPVHFDASV<br/> KETAAAKFERQHMDsSTSAASSSNYCNQMMKSRNLTKDRCKPVNTFVHESLADVQAVCSQKNVACKNGOTNCYQSYSTMSTDCRETGSSKYPNCAYKTTQANKHIIVACENFYVYPVHFDASV</p> <p><b>Proposed:</b> aliSize=112 (resi) RMSD=0.88 (Å)<br/> KESAAAKFERQHMDs-GNSpSSSNYCNLMCCRKMTQGKCKPVNTFVHESLADVKAVCSQKVTCKNGOTNCYQSKSTMRTDCRETGSSKYPNCAYKTTQVEKHIIVACGKPSVYPVHFDASV-----psvpvhfdasv<br/> KETAAAKFERQHMDsTSA-ASSSNYCNQMMKSRNLTKDRCKPVNTFVHESLADVQAVCSQKNVACKNGOTNCYQSYSTMSTDCRETGSSKYPNCAYKTTQANKHIIVACENFYVYPVHFDASV-----npyvpvhfdasv-----</p> |

|     |                                             |   |       |                                                                                                                                                                                                                                                                                                                                                                                                                                                                                                                                                                                                                                                                                                                                                                                                                                                                                                                                                                                                                                                                                                                                                                                                                                                                                                                                                                                                            |
|-----|---------------------------------------------|---|-------|------------------------------------------------------------------------------------------------------------------------------------------------------------------------------------------------------------------------------------------------------------------------------------------------------------------------------------------------------------------------------------------------------------------------------------------------------------------------------------------------------------------------------------------------------------------------------------------------------------------------------------------------------------------------------------------------------------------------------------------------------------------------------------------------------------------------------------------------------------------------------------------------------------------------------------------------------------------------------------------------------------------------------------------------------------------------------------------------------------------------------------------------------------------------------------------------------------------------------------------------------------------------------------------------------------------------------------------------------------------------------------------------------------|
| 759 | <p>1r5cA (124)</p> <hr/> <p>1js0A (124)</p> | C | 68.55 | <p><b>TM-align:</b> aliSize=94 (resi)      RMSD=1.43 (Å)<br/> kesaaakferqhmdsgnspss-----SSSNYCNLMCCRKMTQGKCKPVNTFVHESLADVKAVCSQKKVTCKNGOTNCYQSKSTMRIIDCRETGSSKYPNCAYKTTQVEKHIIVACGGKPSVPVHFDASV-----<br/> -----ketaaakferqhmdsstsaasSSSNYCNLMCCRKMTQGKCKPVNTFVHESLADVKAVCSQKKVTCKNGOTNCYQSKSTMRIIDCRETGSSKYPNCAYKTTQANKHIIIVACGGKPSVPVHFDASV-----</p> <p><b>SARST:</b> aliSize=121 (resi)      RMSD=11.44 (Å)<br/> k-ESAAAKFERQHMDSGNSPSS--SNYCNLMCCRKMTQGKCKPVNTFVHESLADVKAVCSQKKVTCKNGOTNCYQSKSTMRIIDCRETGSSKYPNCAYKTTQVEKHIIVACGGKPSVPVHFDASV-v<br/> -kETAAAKFERQHMDSSSTAAS--SNYCNLMCCRKMTQGKCKPVNTFVHESLADVKAVCSQKKVTCKNGOTNCYQSKSTMRIIDCRETGSSKYPNCAYKTTQANKHIIIVACGGKPSVPVHFDASV-v</p> <p><b>BLAST:</b> aliSize=107 (resi)      iden=81.45% (101/124)      simi=86.29% (107/124)<br/> KESAAAKFERQHMDSGNSPSSSNYCNLMCCRKMTQGKCKPVNTFVHESLADVKAVCSQKKVTCKNGOTNCYQSKSTMRIIDCRETGSSKYPNCAYKTTQVEKHIIVACGGKPSVPVHFDASV<br/> KETAAAKFERQHMDSSSTAAS--SNYCNLMCCRKMTQGKCKPVNTFVHESLADVKAVCSQKKVTCKNGOTNCYQSKSTMRIIDCRETGSSKYPNCAYKTTQANKHIIIVACGGKPSVPVHFDASV</p> <p><b>Proposed:</b> aliSize=103 (resi)      RMSD=0.67 (Å)<br/> kesaaakferqhmdsgnspss-----SSSNYCNLMCCRKMTQGKCKPVNTFVHESLADVKAVCSQKKVTCKNGOTNCYQSKSTMRIIDCRETGSSKYPNCAYKTTQVEKHIIVACGGKPSVPVHFDASV<br/> -----ketaaakferqhmdsstsaasSSSNYCNLMCCRKMTQGKCKPVNTFVHESLADVKAVCSQKKVTCKNGOTNCYQSKSTMRIIDCRETGSSKYPNCAYKTTQANKHIIIVACGGKPSVPVHFDASV</p> |
| 760 | <p>1r5cA (124)</p> <hr/> <p>1r3mB (122)</p> | N | 98.36 | <p><b>TM-align:</b> aliSize=103 (resi)      RMSD=0.35 (Å)<br/> kesaaakferqhmdsgnspss-----SSSNYCNLMCCRKMTQGKCKPVNTFVHESLADVKAVCSQKKVTCKNGOTNCYQSKSTMRIIDCRETGSSKYPNCAYKTTQVEKHIIVACGGKPSVPVHFDASV<br/> -----kesaaakferqhmdsgnspSSSNYCNLMCCRKMTQGKCKPVNTFVHESLADVKAVCSQKKVTCKNGOTNCYQSKSTMRIIDCRETGSSKYPNCAYKTTQVEKHIIVACGGKPSVPVHFDASV</p> <p><b>SARST:</b> aliSize=120 (resi)      RMSD=9.87 (Å)<br/> k-ESAAAKFERQHMDSGNSPSS--SNYCNLMCCRKMTQGKCKPVNTFVHESLADVKAVCSQKKVTCKNGOTNCYQSKSTMRIIDCRETGSSKYPNCAYKTTQVEKHIIVACGGKPSVPVHFDASV-v<br/> -kESAAAKFERQHMDSGNSPSS--SNYCNLMCCRKMTQGKCKPVNTFVHESLADVKAVCSQKKVTCKNGOTNCYQSKSTMRIIDCRETGSSKYPNCAYKTTQVEKHIIVACGGKPSVPVHFDASV-v</p> <p><b>BLAST:</b> aliSize=122 (resi)      iden=100.00% (122/122)      simi=100.00% (122/122)<br/> KESAAAKFERQHMDSGNSPSS--SNYCNLMCCRKMTQGKCKPVNTFVHESLADVKAVCSQKKVTCKNGOTNCYQSKSTMRIIDCRETGSSKYPNCAYKTTQVEKHIIVACGGKPSVPVHFDASV<br/> KESAAAKFERQHMDSGNSPSS--SNYCNLMCCRKMTQGKCKPVNTFVHESLADVKAVCSQKKVTCKNGOTNCYQSKSTMRIIDCRETGSSKYPNCAYKTTQVEKHIIVACGGKPSVPVHFDASV</p> <p><b>Proposed:</b> aliSize=122 (resi)      RMSD=0.51 (Å)<br/> KESAAAKFERQHMDSGNSPSS--SNYCNLMCCRKMTQGKCKPVNTFVHESLADVKAVCSQKKVTCKNGOTNCYQSKSTMRIIDCRETGSSKYPNCAYKTTQVEKHIIVACGGKPSVPVHFDASV<br/> KESAAAKFERQHMDSGN-SP--SNYCNLMCCRKMTQGKCKPVNTFVHESLADVKAVCSQKKVTCKNGOTNCYQSKSTMRIIDCRETGSSKYPNCAYKTTQVEKHIIVACGGKPSVPVHFDASV</p>                        |
| 761 | <p>1r5cA (124)</p> <hr/> <p>1a2wA (124)</p> | N | 80.65 | <p><b>TM-align:</b> aliSize=104 (resi)      RMSD=0.89 (Å)<br/> kesaaakferqhmdsgnspss-----SSSNYCNLMCCRKMTQGKCKPVNTFVHESLADVKAVCSQKKVTCKNGOTNCYQSKSTMRIIDCRETGSSKYPNCAYKTTQVEKHIIVACGGKPSVPVHFDASV<br/> -----ketaaakferqhmdsstsaasSSSNYCNLMCCRKMTQGKCKPVNTFVHESLADVKAVCSQKKVTCKNGOTNCYQSKSTMRIIDCRETGSSKYPNCAYKTTQANKHIIIVACGGKPSVPVHFDASV</p> <p><b>SARST:</b> aliSize=118 (resi)      RMSD=12.35 (Å)<br/> k-ESAAAKFERQHMDSGNSPSS--SNYCNLMCCRKMTQGKCKPVNTFVHESLADVKAVCSQKKVTCKNGOTNCYQSKSTMRIIDCRETGSSKYPNCAYKTTQVEKHIIVACGGKPSVPVHFDASV-v<br/> -kETAAAKFERQHMDSSSTAAS--SNYCNLMCCRKMTQGKCKPVNTFVHESLADVKAVCSQKKVTCKNGOTNCYQSKSTMRIIDCRETGSSKYPNCAYKTTQANKHIIIVACGGKPSVPVHFDASV-v</p> <p><b>BLAST:</b> aliSize=107 (resi)      iden=81.45% (101/124)      simi=86.29% (107/124)<br/> KESAAAKFERQHMDSGNSPSSSNYCNLMCCRKMTQGKCKPVNTFVHESLADVKAVCSQKKVTCKNGOTNCYQSKSTMRIIDCRETGSSKYPNCAYKTTQVEKHIIVACGGKPSVPVHFDASV<br/> KETAAAKFERQHMDSSSTAAS--SNYCNLMCCRKMTQGKCKPVNTFVHESLADVKAVCSQKKVTCKNGOTNCYQSKSTMRIIDCRETGSSKYPNCAYKTTQANKHIIIVACGGKPSVPVHFDASV</p> <p><b>Proposed:</b> aliSize=123 (resi)      RMSD=0.92 (Å)<br/> KESAAAKFERQHMDSGNSPSSSNYCNLMCCRKMTQGKCKPVNTFVHESLADVKAVCSQKKVTCKNGOTNCYQSKSTMRIIDCRETGSSKYPNCAYKTTQVEKHIIVACGGKPSVPVHFDASV<br/> KETAAAKFERQHMDSSSTAAS--SNYCNLMCCRKMTQGKCKPVNTFVHESLADVKAVCSQKKVTCKNGOTNCYQSKSTMRIIDCRETGSSKYPNCAYKTTQANKHIIIVACGGKPSVPVHFDASV</p>                      |

|     |                                               |   |       |                                                                                                                                                                                                                                                                                                                                                                                                                                                                                                                                                                                                                                                                                                                                                                                                                                                                                                                                                                                                                                                                                                                                                                                                                                                                                                                         |
|-----|-----------------------------------------------|---|-------|-------------------------------------------------------------------------------------------------------------------------------------------------------------------------------------------------------------------------------------------------------------------------------------------------------------------------------------------------------------------------------------------------------------------------------------------------------------------------------------------------------------------------------------------------------------------------------------------------------------------------------------------------------------------------------------------------------------------------------------------------------------------------------------------------------------------------------------------------------------------------------------------------------------------------------------------------------------------------------------------------------------------------------------------------------------------------------------------------------------------------------------------------------------------------------------------------------------------------------------------------------------------------------------------------------------------------|
| 762 | <p>1r5cA<br/>(124)</p> <p>1h8xA<br/>(125)</p> | N | 71.77 | <p>TM-align: aliSize=103 (resi) RMSD=1.36 (Å)<br/> kesaaakferqhmdsgnsp-----SSNYCNLMCCRKMTQGKCKPVNTFVHESLADVKAVCSOKKVTC-KNgTNCYQSKSTMRTDCRETGSSKYPNCAYKTTQVEKHIIVACGGKPSVPVHFDASV-<br/> -----kesaaakferqhmdsgnspSSSYCNLMRRRNMTOGRCKPVNTFVHEPLVDVQNVCFQEKVTCKNG-OGNCYKSNSSMHI TDCRLTNGSRYPNCAYRTSOKERHIIVACEGSPYVPVHFDASVe</p> <p>SARST: aliSize=120 (resi) RMSD=11.93 (Å)<br/> k-ESAAAKFERQHMD--SGNSPSSSYCNLMCCRKMTQGKCKPVNTFVHESLADVKAVCSOKKVTC-KNgTNCYQSKSTMRTDCRETGSSKYPNCAYKTTQVEKHIIVACGGKPSVPVHFDASV--v<br/> -kESAAAKFERQHMDsgNSPSSST--YCNLMRRRNMTOGRCKPVNTFVHEPLVDVQNVCFQEKVTCKNGGNCYKSNSSMHI TDCRLTNGSRYPNCAYRTSOKERHIIVACEGSPYVPVHFDASVve-</p> <p>BLAST: aliSize=105 (resi) iden=77.42% (96/124) simi=84.68% (105/124)<br/> KESAAAKFERQHMDSGNSPSSSYCNLMCCRKMTQGKCKPVNTFVHESLADVKAVCSOKKVTC-KNgTNCYQSKSTMRTDCRETGSSKYPNCAYKTTQVEKHIIVACGGKPSVPVHFDASV-<br/> KESAAAKFERQHMDSGNSPSSSYCNLMRRRNMTOGRCKPVNTFVHEPLVDVQNVCFQEKVTCKNGGNCYKSNSSMHI TDCRLTNGSRYPNCAYRTSOKERHIIVACEGSPYVPVHFDASVe</p> <p>Proposed: aliSize=122 (resi) RMSD=1.00 (Å)<br/> KESAAAKFERQHMDSGnSPS-SSSYCNLMCCRKMTQGKCKPVNTFVHESLADVKAVCSOKKVTC-KNgTNCYQSKSTMRTDCRETGSSKYPNCAYKTTQVEKHIIVACGGKPSVPVHFDASV-<br/> KESAAAKFERQHMDSG-NSPSSSYCNLMRRRNMTOGRCKPVNTFVHEPLVDVQNVCFQEKVTCKNG-OGNCYKSNSSMHI TDCRLTNGSRYPNCAYRTSOKERHIIVACEGSPYVPVHFDASVe</p> |
| 763 | <p>1r3mB<br/>(122)</p> <p>1r5dA<br/>(124)</p> | N | 99.18 | <p>TM-align: aliSize=103 (resi) RMSD=0.37 (Å)<br/> kesaaakferqhmdsgnsp-----SSNYCNLMCCRKMTQGKCKPVNTFVHESLADVKAVCSOKKVTC-KNgTNCYQSKSTMRTDCRETGSSKYPNCAYKTTQVEKHIIVACGGKPSVPVHFDASV-<br/> -----kesaaakferqhmdsgnspSSSYCNLMCCRKMTQGKCKPVNTFVHESLADVKAVCSOKKVTC-KNgTNCYQSKSTMRTDCRETGSSKYPNCAYKTTQVEKHIIVACGGKPSVPVHFDASV</p> <p>SARST: aliSize=120 (resi) RMSD=9.88 (Å)<br/> k-ESAAAKFERQHMDSGNSPS--SYCNLMCCRKMTQGKCKPVNTFVHESLADVKAVCSOKKVTC-KNgTNCYQSKSTMRTDCRETGSSKYPNCAYKTTQVEKHIIVACGGKPSVPVHFDASV--v<br/> -kESAAAKFERQHMDSGNSPSSSYCNLMCCRKMTQGKCKPVNTFVHESLADVKAVCSOKKVTC-KNgTNCYQSKSTMRTDCRETGSSKYPNCAYKTTQVEKHIIVACGGKPSVPVHFDASVv-</p> <p>BLAST: aliSize=122 (resi) iden=100.00% (122/122) simi=100.00% (122/122)<br/> KESAAAKFERQHMDSGNSPS--SYCNLMCCRKMTQGKCKPVNTFVHESLADVKAVCSOKKVTC-KNgTNCYQSKSTMRTDCRETGSSKYPNCAYKTTQVEKHIIVACGGKPSVPVHFDASV-<br/> KESAAAKFERQHMDSGNSPSSSYCNLMCCRKMTQGKCKPVNTFVHESLADVKAVCSOKKVTC-KNgTNCYQSKSTMRTDCRETGSSKYPNCAYKTTQVEKHIIVACGGKPSVPVHFDASV</p> <p>Proposed: aliSize=122 (resi) RMSD=0.53 (Å)<br/> KESAAAKFERQHMDSGNS-P-SSSYCNLMCCRKMTQGKCKPVNTFVHESLADVKAVCSOKKVTC-KNgTNCYQSKSTMRTDCRETGSSKYPNCAYKTTQVEKHIIVACGGKPSVPVHFDASV-<br/> KESAAAKFERQHMDSGNSpSSSYCNLMCCRKMTQGKCKPVNTFVHESLADVKAVCSOKKVTC-KNgTNCYQSKSTMRTDCRETGSSKYPNCAYKTTQVEKHIIVACGGKPSVPVHFDASV</p>               |
| 764 | <p>1r3mB<br/>(122)</p> <p>1a2wA<br/>(124)</p> | N | 81.15 | <p>TM-align: aliSize=105 (resi) RMSD=1.11 (Å)<br/> kesaaakferqhmdsgn-----SPSSNYCNLMCCRKMTQGKCKPVNTFVHESLADVKAVCSOKKVTC-KNgTNCYQSKSTMRTDCRETGSSKYPNCAYKTTQVEKHIIVACGGKPSVPVHFDASV-<br/> -----ketaaakferqhmdsstsaASSNYCNLMKSRNLTQDRCKPVNTFVHESLADVQAVCSQKNVACKNGTNCYQSYSTMSITDCRETGSSKYPNCAYKTTQANKHIIVACEGPNPYVPVHFDASV</p> <p>SARST: aliSize=120 (resi) RMSD=14.21 (Å)<br/> k-ESAAAKFERQHMDSGNSPS--SYCNLMCCRKMTQGKCKPVNTFVHESLADVKAVCSOKKVTC-KNgTNCYQSKSTMRTDCRETGSSKYPNCAYKTTQVEKHIIVACGGKPSVPVHFDASV--v<br/> -kETAAAKFERQHMDSTSAAsSYCNLMKSRNLTQDRCKPVNTFVHESLADVQAVCSQKNVACKNGTNCYQSYSTMSITDCRETGSSKYPNCAYKTTQANKHIIVACEGPNPYVPVHFDASVv-</p> <p>BLAST: aliSize=105 (resi) iden=81.97% (100/122) simi=86.07% (105/122)<br/> KESAAAKFERQHMDSGNSP--SSNYCNLMCCRKMTQGKCKPVNTFVHESLADVKAVCSOKKVTC-KNgTNCYQSKSTMRTDCRETGSSKYPNCAYKTTQVEKHIIVACGGKPSVPVHFDASV-<br/> KETAAAKFERQHMDSTSAAsSYCNLMKSRNLTQDRCKPVNTFVHESLADVQAVCSQKNVACKNGTNCYQSYSTMSITDCRETGSSKYPNCAYKTTQANKHIIVACEGPNPYVPVHFDASV</p> <p>Proposed: aliSize=122 (resi) RMSD=0.76 (Å)<br/> KESAAAKFERQHMDSGNSP-SSNYCNLMCCRKMTQGKCKPVNTFVHESLADVKAVCSOKKVTC-KNgTNCYQSKSTMRTDCRETGSSKYPNCAYKTTQVEKHIIVACGGKPSVPVHFDASV-<br/> KETAAAKFERQHMDSTSAAsSYCNLMKSRNLTQDRCKPVNTFVHESLADVQAVCSQKNVACKNGTNCYQSYSTMSITDCRETGSSKYPNCAYKTTQANKHIIVACEGPNPYVPVHFDASV</p>              |

|     |                                                     |   |       |                                                                                                                                                                                                                                                                                                                                                                                                                                                                                                                                                                                                                                                                                                                                                                                                                                                                                                                                                                                                                                                                                                                                                                                                                                                                                                                                                                                                                                                                                                                                                            |
|-----|-----------------------------------------------------|---|-------|------------------------------------------------------------------------------------------------------------------------------------------------------------------------------------------------------------------------------------------------------------------------------------------------------------------------------------------------------------------------------------------------------------------------------------------------------------------------------------------------------------------------------------------------------------------------------------------------------------------------------------------------------------------------------------------------------------------------------------------------------------------------------------------------------------------------------------------------------------------------------------------------------------------------------------------------------------------------------------------------------------------------------------------------------------------------------------------------------------------------------------------------------------------------------------------------------------------------------------------------------------------------------------------------------------------------------------------------------------------------------------------------------------------------------------------------------------------------------------------------------------------------------------------------------------|
| 765 | <p>1r3mB<br/>(122)</p> <hr/> <p>1lbaA<br/>(124)</p> | N | 99.18 | <p>TM-align: aliSize=103 (resi) RMSD=0.51 (Å)<br/> kesaaakferqhmdsgnsp-----S-SNYCNLMCCRKMTQGKCKPVNTFVHESLADVKAVCSQKKVTCCKNGOTNCYOSKSTMRI TDCRETGSSKYPNCAYKTTQVEKHI IVACGGKPSVPVHFDASV<br/> -----kesaaakferqhmdsgnspssS-SNYCNLMCCRKMTQGKCKPVNTFVHESLADVKAVCSQKKVTCCKNGOTNCYOSKSTMRI TDCRETGSSKYPNCAYKTTQVEKHI IVACGGKPSVPVHFDASV</p> <p>SARST: aliSize=120 (resi) RMSD=9.84 (Å)<br/> k-ESAAAKFERQHMDSGNSPS--SYCNLMCCRKMTQGKCKPVNTFVHESLADVKAVCSQKKVTCCKNGOTNCYOSKSTMRI TDCRETGSSKYPNCAYKTTQVEKHI IVACGGKPSVPVHFDAS -v<br/> -kESAAAKFERQHMDSGNSPSsSYCNLMCCRKMTQGKCKPVNTFVHESLADVKAVCSQKKVTCCKNGOTNCYOSKSTMRI TDCRETGSSKYPNCAYKTTQVEKHI IVACGGKPSVPVHFDASv-</p> <p>BLAST: aliSize=122 (resi) iden=100.00% (122/122) simi=100.00% (122/122)<br/> KESAAAKFERQHMDSGNSPS--SYCNLMCCRKMTQGKCKPVNTFVHESLADVKAVCSQKKVTCCKNGOTNCYOSKSTMRI TDCRETGSSKYPNCAYKTTQVEKHI IVACGGKPSVPVHFDASV<br/> KESAAAKFERQHMDSGNSPSSsSYCNLMCCRKMTQGKCKPVNTFVHESLADVKAVCSQKKVTCCKNGOTNCYOSKSTMRI TDCRETGSSKYPNCAYKTTQVEKHI IVACGGKPSVPVHFDASV</p> <p>Proposed: aliSize=122 (resi) RMSD=0.61 (Å)<br/> KESAAAKFERQHMDSGNS-P-S-SNYCNLMCCRKMTQGKCKPVNTFVHESLADVKAVCSQKKVTCCKNGOTNCYOSKSTMRI TDCRETGSSKYPNCAYKTTQVEKHI IVACGGKPSVPVHFDASV<br/> KESAAAKFERQHMDSGNSpSsS-SNYCNLMCCRKMTQGKCKPVNTFVHESLADVKAVCSQKKVTCCKNGOTNCYOSKSTMRI TDCRETGSSKYPNCAYKTTQVEKHI IVACGGKPSVPVHFDASV</p>                                                                                                                                                                                                              |
| 766 | <p>1r3mB<br/>(122)</p> <hr/> <p>1h8xA<br/>(125)</p> | N | 73.77 | <p>TM-align: aliSize=103 (resi) RMSD=1.33 (Å)<br/> kesaaakferqhmdsgns-----P-SSNYCNLMCCRKMTQGKCKPVNTFVHESLADVKAVCSQKKVTCCKNGOTNCYOSKSTMRI TDCRETGSSKYPNCAYKTTQVEKHI IVACGGKPSVPVHFDASV -<br/> -----kesaaakferqhmdsgnspSSSYCNLMCCRKMTQGKCKPVNTFVHESLADVKAVCSQKKVTCCKNGOTNCYOSKSTMRI TDCRETGSSKYPNCAYKTTQVEKHI IVACGGKPSVPVHFDASV e</p> <p>SARST: aliSize=120 (resi) RMSD=14.10 (Å)<br/> k-ESAAAKFERQHMDSGNSPSSN--SYCNLMCCRKMTQGKCKPVNTFVHESLADVKAVCSQKKVTCCKNGOTNCYOSKSTMRI TDCRETGSSKYPNCAYKTTQVEKHI IVACGGKPSVPVHFDAS --v<br/> -kESAAAKFERQHMDSGNSPSSStSYCNLMCCRKMTQGKCKPVNTFVHESLADVKAVCSQKKVTCCKNGOTNCYOSKSTMRI TDCRETGSSKYPNCAYKTTQVEKHI IVACGGKPSVPVHFDASve-</p> <p>BLAST: aliSize=104 (resi) iden=77.05% (94/122) simi=85.25% (104/122)<br/> KESAAAKFERQHMDSGNSPSSN--SYCNLMCCRKMTQGKCKPVNTFVHESLADVKAVCSQKKVTCCKNGOTNCYOSKSTMRI TDCRETGSSKYPNCAYKTTQVEKHI IVACGGKPSVPVHFDASV -<br/> KESAAAKFERQHMDSGNSPSSStSYCNLMCCRKMTQGKCKPVNTFVHESLADVKAVCSQKKVTCCKNGOTNCYOSKSTMRI TDCRETGSSKYPNCAYKTTQVEKHI IVACGGKPSVPVHFDASV e</p> <p>Proposed: aliSize=120 (resi) RMSD=0.92 (Å)<br/> KESAAAKFERQHMDSGNSP---sSYCNLMCCRKMTQGKCKPVNTFVHESLADVKAVCSQKKVTCCKNGOTNCYOSKSTMRI TDCRETGSSKYPNCAYKTTQVEKHI IVACGGKPSVPVHFDASV -<br/> KESAAAKFERQHMDSGNSPSSStSYCNLMCCRKMTQGKCKPVNTFVHESLADVKAVCSQKKVTCCKNGOTNCYOSKSTMRI TDCRETGSSKYPNCAYKTTQVEKHI IVACGGKPSVPVHFDASV e</p>                                                                                                                                                                                                |
| 767 | <p>1dz3A<br/>(123)</p> <hr/> <p>2ieyA<br/>(164)</p> | C | 8.94  | <p>TM-align: aliSize=90 (resi) RMSD=3.72 (Å)<br/> -----S-KVCIAD-DNRELVSLLDEYISSqpdmev-----lgtayngq-----Dcl-QMLEEKRPdILLDI----IMPhLDGLAVLERIRaG-FEH-OPNVIMLT--A-----F-GOEDVT-KKVELGASFI LKPFDMENlahhiravvgkt-----<br/> gdydyllKLLALGdSGV-GKTFLYRYTD-----nkfnpk-----fittvgidfrekrvvydfkvhlqlwdts---lTTAFFRDA-GFLIFDI t sqQSf- -NVRNWSQLQ--AnAYCenPDIVLIGnkAdlpdqRevNERQArELAEKYIPYFETSAATGQ-----nveksvetlldlikr</p> <p>SARST: aliSize=114 (resi) RMSD=11.18 (Å)<br/> si-----KYCIAD-DNRELVSLLDEYISSOPDMEVIGTA-----YNGDClqMLEEKRPDI LLDI implDGLAVLER-----IRAGFEH-OPNVIMLTAFGO-----EDVTKKVELGASFI LKPFDMENLAHHIROVYGK---t<br/> --gdydyllKLLALGdSGVGTTFLYRYTDNKFNPkfiittvgidfrekrvvydfkvhlqlwdtslT-TAFFRDAGFLIFDL---TSQQSf- -NVRnwsqLQAnAYCenPDIVLIGNKADlpdqrevneROARELAEKYIPYFETSAATGQVEKSVETLLDLIkr-</p> <p>BLAST: aliSize=14 (resi) iden=4.88% (6/123) simi=11.38% (14/123)<br/> sikveiadnrelvslldeyissq-----gdydyllkllalgdsgvgkttflyrytdnkfnpkfittvgidfrekrvvydfkvhlqlwdtslTtaffrdagflifdltsqsflnvrnwsqLqanaycenPDIVLIGNKADLPQREVNERQARELAEKYIPYFETSAATGQVEKSVETLLDLIkr-----<br/> phldglavleriragfehqpnvimltafgqedvtkkavelgasyfi LkpfDMENlahhiravvgkt</p> <p>Proposed: aliSize=97 (resi) RMSD=2.52 (Å)<br/> -----S-KVCIAD-DN-relVSLLEDEYISS-----qpdmevigtayngqdcIQMIEE--KRPDI LLDI----IM--phLDGLAVLERIRaGFEHQ--OPNVIMLTAF--GOEDVT-KKVELGASFI LKPFDMENLAHHIROVYGK---t<br/> gdydyllKLLALGdSGV-GKTFLYRYTDnkfnpkfittvgidfrekrvvydfkvhlqlwdts-----LT-TAFFRDAMGFLIFDI t sqQSf1---NVRNWSQLQ--ANAYCenPDIVLIGNKADlpdqrevNERQARELAEKYIPYFETSAATGQVEKSVETLLDLImkrm</p> |



|     |                                                   |   |       |                                                                                                                                                                                                                                                                                                                                                                                                                                                                                                                                                                                                                                                                                                                                                                                                                                                                                                                |
|-----|---------------------------------------------------|---|-------|----------------------------------------------------------------------------------------------------------------------------------------------------------------------------------------------------------------------------------------------------------------------------------------------------------------------------------------------------------------------------------------------------------------------------------------------------------------------------------------------------------------------------------------------------------------------------------------------------------------------------------------------------------------------------------------------------------------------------------------------------------------------------------------------------------------------------------------------------------------------------------------------------------------|
| 768 | <p>1q10A<br/>(56)</p> <hr/> <p>1k50A<br/>(63)</p> | C | 5.36  | <p><b>TM-align:</b> aliSize=36 (resi) RMSD=1.87 (Å)<br/> -----MQYKVIILNGKT-LKGETTTEAVDaATAEKVV-KqFFNdNG-Vdgewtyddatktftvte-----<br/> eeVTIKANLIFANgSTQTAEFKGTf-EKATSEAYa-YAD-TLKK-----dngewtadvadkgytlnikfag</p> <p><b>SARST:</b> aliSize=45 (resi) RMSD=8.15 (Å)<br/> m-----QYKVIILNGKT-LKGETTTEAVDAATAEKVVVKQFFNDNGVDGEWYI-----datktftvte<br/> -eeVTIKANLIFANgSTQTAEFKGTfEKATSEAYAYADTLKKDNGEWTVadvadkgytlnikfag-----</p> <p><b>BLAST:</b> aliSize=22 (resi) iden=30.36% (17/56) simi=39.29% (22/56)<br/> mqyk-----VILNGKTLKGETTTeAVDAATAEKVV--KQFFNDNGvdgEWYIDATKTFIV-----te<br/> ----eevtikanlIFANgSTQTAEFKGTfEKATSEAYaYADTLKKDNG---EWADVADNGYTLnikfag--</p> <p><b>Proposed:</b> aliSize=55 (resi) RMSD=2.28 (Å)<br/> -----MQYKVIILNGK--TLKGETTTEAVDaATAEKVVVKQFFNDNGV---DGEWYIDATKTFIVTE--<br/> eEVTIKANLIfanGSTQTAEFKGTf-EKATSEAYAYADTLKKdngEWTADVADKGYTLNIKfag</p>                                      |
| 769 | <p>1q10A<br/>(56)</p> <hr/> <p>1k53A<br/>(72)</p> | C | 5.36  | <p><b>TM-align:</b> aliSize=36 (resi) RMSD=1.89 (Å)<br/> -----MQYKVIILNGKT-LKGETTTEAVDaATAEKVV-KqFFNdNG-Vdgewtyddatktftvte-----<br/> mhhhhhameevTIKANLIFANaSTQTAEFKGTf-EKATSEAYa-YAD-TLKK-----dngewtvdvadkgytlnikfag</p> <p><b>SARST:</b> aliSize=45 (resi) RMSD=8.08 (Å)<br/> m-----QYKVIILNGKT-LKGETTTEAVDAATAEKVVVKQFFNDNGVDGEWYI-----datktftvte<br/> -mhhhhhameevTIKANLIFANaSTQTAEFKGTfEKATSEAYAYADTLKKDNGEWTVadvadkgytlnikfag-----</p> <p><b>BLAST:</b> aliSize=22 (resi) iden=28.57% (16/56) simi=39.29% (22/56)<br/> mqykvilngktlkg-----ETITEAVDaATAEKVVVKqffnDNGvdgEWYIDATKTFIV-----te<br/> -----mhhhhhameevtikanlifanastqtaefkgtfEKATSEAY--YADTLKK---DNG---EWADVADNGYTLnikfag--</p> <p><b>Proposed:</b> aliSize=55 (resi) RMSD=2.18 (Å)<br/> -----MQYKVIILNGK--TLKGETTTEAVDaATAEKVVVKQFFNDNGV---DGEWYIDATKTFIVTE--<br/> mhhhhhameEVTIKANLIFANaSTQTAEFKGTf-EKATSEAYAYADTLKKdngEWTVDVAADKGYTLNIKfag</p> |
| 770 | <p>1q10A<br/>(56)</p> <hr/> <p>1k52A<br/>(72)</p> | C | 16.07 | <p><b>TM-align:</b> aliSize=36 (resi) RMSD=1.88 (Å)<br/> -----MQYKVIILNGKT-LKGETTTEAVDaATAEKVV-KqFFNdNG-Vdgewtyddatktftvte-----<br/> mhhhhhameevTIKANLIFANgSTQTAEFKGTf-EKATSEAYa-YAD-TLKK-----dngewtvdvadggytlnikfag</p> <p><b>SARST:</b> aliSize=45 (resi) RMSD=8.08 (Å)<br/> m-----QYKVIILNGKT-LKGETTTEAVDAATAEKVVVKQFFNDNGVDGEWYI-----datktftvte<br/> -mhhhhhameevTIKANLIFANgSTQTAEFKGTfEKATSEAYAYADTLKKDNGEWTVadvadggytlnikfag-----</p> <p><b>BLAST:</b> aliSize=21 (resi) iden=28.57% (16/56) simi=37.50% (21/56)<br/> mqyk-----VILNGKTLKGETTTeAVDAATAEKVV--KQFFNDNGvdgEWYIDATKTFIV-----te<br/> ----mhhhhhameevtikanlIFANgSTQTAEFKGTf-EKATSEAYaYADTLKKDNG---EWADVADGGYTLnikfag--</p> <p><b>Proposed:</b> aliSize=55 (resi) RMSD=2.15 (Å)<br/> -----MQYKVIILNGK--TLKGETTTEAVDaATAEKVVVKQFFNDNGVD-GEWYIDATKTFIVTE<br/> mhhhhhameEVTIKANLIFANgSTQTAEFKGTf-EKATSEAYAYADTLKKDnGEWTVadvadggyTLNIKfag</p>        |

|     |                                             |   |       |                                                                                                                                                                                                                                                                                                                                                                                                                                                                                                                                                                                                                                                                                                                                                                                                                                                                                                                                                                                                                                                          |
|-----|---------------------------------------------|---|-------|----------------------------------------------------------------------------------------------------------------------------------------------------------------------------------------------------------------------------------------------------------------------------------------------------------------------------------------------------------------------------------------------------------------------------------------------------------------------------------------------------------------------------------------------------------------------------------------------------------------------------------------------------------------------------------------------------------------------------------------------------------------------------------------------------------------------------------------------------------------------------------------------------------------------------------------------------------------------------------------------------------------------------------------------------------|
| 771 | <p>1q10A<br/>(56)</p> <p>2hj1A<br/>(77)</p> | C | 1.79  | <p><b>TM-align:</b> aliSize=36 (resi) RMSD=2.21 (Å)<br/> --MQYKVI LNKGTKLKGETTTEAV--DAA-TAEKVVkqF-F-NdNGVdgewtyddatktftvte-----<br/> nqINIEIAYAFPERYYLKSFOVdegITVQTAITQS--GIIS-QFP-----eidlstnkigifsrpikltdvlkegdrieiyrpll</p> <p><b>SARST:</b> aliSize=45 (resi) RMSD=10.14 (Å)<br/> m---QYKVI LNKGTKLKGETTTEA---VDAATAEKV---VKQFFNDNGVDGEWTYD-----datktftvte<br/> -nqINIEIAYAFPERYYLKSFOVdegITVQTAITQSgILSQFPEIDLSTNKIGIFsrpikltdvlkegdrieiyrpll-----</p> <p><b>BLAST:</b> aliSize=10 (resi) iden=12.50% (7/56) simi=17.86% (10/56)<br/> mqykvilngkt-----KGETTTEAVDAATA---EKVVKQF-----fndngvdgewtyddatktftvte<br/> -----nqinieiaayafperyyLKSFOVdegITVQTAITQSgILSQFPEIDLSTNKIGIFsrpikltdvlkegdrieiyrpll-----</p> <p><b>Proposed:</b> aliSize=49 (resi) RMSD=2.91 (Å)<br/> -MQYKVI LNKG--TLKGETTTEAVDAATAEKVVKQ--FF-----NDNGVDGEWTY--D---dATKT--F-----tvte<br/> nQINIEIAYAFPERYYLKSFOVdegITVQTAITQSgILSQFPEIDLSTNKIGIFSRpIklt-DVLKegDrieiyrpll----</p>                                                                                                   |
| 772 | <p>2rlzA<br/>(85)</p> <p>1y50A<br/>(87)</p> | N | 27.06 | <p><b>TM-align:</b> aliSize=44 (resi) RMSD=2.40 (Å)<br/> mvqqkvevrlk-----TGLQARPAALFVQENRFTSDVFLKDGKKNnAK-SIMGLMSLAVStgtevtliaqgedeqaleklaayvqev-----<br/> -----aektfkvvsdSGIHARPATILVQTSKWNSEIQLEYNGKTVNLK-SIMGVMSLGIPIKATIKITAEADAAEAMALTDTLAKEglae</p> <p><b>SARST:</b> aliSize=81 (resi) RMSD=16.69 (Å)<br/> mv-QQKVEVRLKTGLQARPAALFVQENRFTSDVFLKDGKKNnAKSIMGLMSLAVSTTEVTLIHQEED--EQALEKLAAYVQE---ev<br/> --aEKTfKvVSDSGIHARPATILVQTSKWNSEIQLEYNGKTVNLK-SIMGVMSLGIPIKATIKITAEADAAEAMALTDTLAKEglae--</p> <p><b>BLAST:</b> aliSize=48 (resi) iden=36.47% (31/85) simi=56.47% (48/85)<br/> mvqqkvevrlk-----TGLQARPAALFVQENRFTSDVFLKDGKKNnAKSIMGLMSLAVSTTEVTLIHQEED--EQALEKLAAYVQE---v<br/> -----aektfkvvsdSGIHARPATILVQTSKWNSEIQLEYNGKTVNLK-SIMGVMSLGIPIKATIKITAEADAAEAMALTDTLAKEglae-</p> <p><b>Proposed:</b> aliSize=53 (resi) RMSD=1.92 (Å)<br/> mVQKVEVRLKT-gLQARPAALFVQENRFTSDVFLKDGKKNnAKSIMGLMSLA-V-----stgtevtliaqgedeqaleklaayvqev<br/> -AEKTfKvVSDSg-IHARPATILVQTSKWNSEIQLEYNGKTVNLK-SIMGVMSLGIPIKATIKITAEADAAEAMALTDTLAKEglae-----</p>       |
| 773 | <p>2rlzA<br/>(85)</p> <p>1y50A<br/>(87)</p> | C | 35.29 | <p><b>TM-align:</b> aliSize=44 (resi) RMSD=2.40 (Å)<br/> mvqqkvevrlk-----TGLQARPAALFVQENRFTSDVFLKDGKKNnAK-SIMGLMSLAVStgtevtliaqgedeqaleklaayvqev-----<br/> -----aektfkvvsdSGIHARPATILVQTSKWNSEIQLEYNGKTVNLK-SIMGVMSLGIPIKATIKITAEADAAEAMALTDTLAKEglae</p> <p><b>SARST:</b> aliSize=81 (resi) RMSD=16.69 (Å)<br/> mv-QQKVEVRLKTGLQARPAALFVQENRFTSDVFLKDGKKNnAKSIMGLMSLAVSTTEVTLIHQEED--EQALEKLAAYVQE---ev<br/> --aEKTfKvVSDSGIHARPATILVQTSKWNSEIQLEYNGKTVNLK-SIMGVMSLGIPIKATIKITAEADAAEAMALTDTLAKEglae--</p> <p><b>BLAST:</b> aliSize=48 (resi) iden=36.47% (31/85) simi=56.47% (48/85)<br/> mvqqkvevrlk-----TGLQARPAALFVQENRFTSDVFLKDGKKNnAKSIMGLMSLAVSTTEVTLIHQEED--EQALEKLAAYVQE---v<br/> -----aektfkvvsdSGIHARPATILVQTSKWNSEIQLEYNGKTVNLK-SIMGVMSLGIPIKATIKITAEADAAEAMALTDTLAKEglae-</p> <p><b>Proposed:</b> aliSize=73 (resi) RMSD=2.00 (Å)<br/> mvqqkvevrlk-----TGLQARPAALFVQENRFTSDVFLKDGKKNnAKSIMGLMSLAVSTTEVTLIHQEED--EQALEKLAAYVQE---E---v<br/> -----aektfkvvsdSGIHARPATILVQTSKWNSEIQLEYNGKTVNLK-SIMGVMSLGIPIKATIKITAEADAAEAMALTDTLAKEglae-</p> |

|     |                                                             |   |       |                                                                                                                                                                                                                                                                                                                                                                                                                                                                                                                                                                                                                                                                                                                                                                                                                                                                                                                                                                                                                                                                                                                                                                                                                                                                                                                                                   |
|-----|-------------------------------------------------------------|---|-------|---------------------------------------------------------------------------------------------------------------------------------------------------------------------------------------------------------------------------------------------------------------------------------------------------------------------------------------------------------------------------------------------------------------------------------------------------------------------------------------------------------------------------------------------------------------------------------------------------------------------------------------------------------------------------------------------------------------------------------------------------------------------------------------------------------------------------------------------------------------------------------------------------------------------------------------------------------------------------------------------------------------------------------------------------------------------------------------------------------------------------------------------------------------------------------------------------------------------------------------------------------------------------------------------------------------------------------------------------|
| 774 | <p><b>1wwaX</b><br/>(105)</p> <p><b>1he7A</b><br/>(107)</p> | C | 91.43 | <p><b>TM-align:</b> aliSize=101 (resi) RMSD=1.41 (Å)<br/> VSFPASVQLHTAVEMHHWCIPFSVDGQPAPSLRWLFNGSVLNETSFIFTEFLEPAANETVRHGCLRLNQPTHVNNNGNYTLAANPFGQASASIMAAFMDNpfefn-----<br/> SHMPASVQLHTAVEMHHWCIPFSVDGQPAPSLRWLFNGSVLNETSFIFTEFLEPAANETVRHGCLRLNQPTHVNNNGNYTLAANPFGQASASIMAAFMDN----fefnpe</p> <p><b>SARST:</b> aliSize=98 (resi) RMSD=1.24 (Å)<br/> vs--FPASVQLHTAVEMHHWCIPFSVDGQPAPSLRWLFNGSVLNETSFIFTEFLEPAANETVRHGCLRLNQPTHVNNNGNYTLAANPFGQASASIMAAFMDN-----pfefn<br/> --shMPASVQLHTAVEMHHWCIPFSVDGQPAPSLRWLFNGSVLNETSFIFTEFLEPAANETVRHGCLRLNQPTHVNNNGNYTLAANPFGQASASIMAAFMDNpfefnpe-----</p> <p><b>BLAST:</b> aliSize=102 (resi) iden=97.14% (102/105) simi=97.14% (102/105)<br/> vsf---PASVQLHTAVEMHHWCIPFSVDGQPAPSLRWLFNGSVLNETSFIFTEFLEPAANETVRHGCLRLNQPTHVNNNGNYTLAANPFGQASASIMAAFMDNPFEFN--<br/> ---shmPASVQLHTAVEMHHWCIPFSVDGQPAPSLRWLFNGSVLNETSFIFTEFLEPAANETVRHGCLRLNQPTHVNNNGNYTLAANPFGQASASIMAAFMDNPFEFNpe</p> <p><b>Proposed:</b> aliSize=105 (resi) RMSD=0.88 (Å)<br/> VSFPASVQLHTAVEMHHWCIPFSVDGQPAPSLRWLFNGSVLNETSFIFTEFLEPAANETVRHGCLRLNQPTHVNNNGNYTLAANPFGQASASIMAAFMDN-DN-PFEFN<br/> SHMPASVQLHTAVEMHHWCIPFSVDGQPAPSLRWLFNGSVLNETSFIFTEFLEPAANETVRHGCLRLNQPTHVNNNGNYTLAANPFGQASASIMAAFMDNPFENPE</p>                                                                                                                       |
| 775 | <p><b>1wwcA</b><br/>(105)</p> <p><b>1he7A</b><br/>(107)</p> | C | 36.19 | <p><b>TM-align:</b> aliSize=84 (resi) RMSD=1.93 (Å)<br/> tvyypprvvsleep-----ELRLEHCIEVVRGNPPTLHWLHNGQPIRESKIITHVEYYQE---GEISEGCLLFNKPTHYNNNGNYTLIAKNPLGTANQTINGHFLKEpfpvde-----<br/> -----shmpasvqlhtaVEMHHWCIPFSVDGQPAPSLRWLFNGSVLNETSFIFTEFLEPaanETVRHGCLRLNQPTHVNNNGNYTLAANPFGQASASIMAAFMDN-----npfefnpe</p> <p><b>SARST:</b> aliSize=96 (resi) RMSD=5.71 (Å)<br/> tv--YYPRVVSIEEPELRLHECIEVVRGNPPTLHWLHNGQPIRESKIITHVEYYQEG---EISEGCLLFNKPTHYNNNGNYTLIAKNPLGTANQTINGHFLKE-----pfpvde<br/> --shMPASVQLHTAVEMHHWCIPFSVDGQPAPSLRWLFNGSVLNETSFIFTEFLEPaaneTVRHGCLRLNQPTHVNNNGNYTLAANPFGQASASIMAAFMDNpfefnpe-----</p> <p><b>BLAST:</b> aliSize=55 (resi) iden=40.95% (43/105) simi=52.38% (55/105)<br/> tvyypp---RVVSIIEEPELRLHECIEVVRGNPPTLHWLHNGQPIRESKIITHVEYYQEGE---EISEGCLLFNKPTHYNNNGNYTLIAKNPLGTANQTINGHFLKEPF-----pvde<br/> -----shmPASVQLHTA-VEMHHWCIPFSVDGQPAPSLRWLFNGSVLNETSFIFTEFLEPaaneTVRHGCLRLNQPTHVNNNGNYTLAANPFGQASASIMAAFMDNPFefnpe----</p> <p><b>Proposed:</b> aliSize=89 (resi) RMSD=1.51 (Å)<br/> tvyypprvvsleepe-----LRLHECIEVVRGNPPTLHWLHNGQPIRESKIITHVEYYQE---GEISEGCLLFNKPTHYNNNGNYTLIAKNPLGTANQTINGHFL-KEPFVDE<br/> -----shmpasvqlhtaVEMHHWCIPFSVDGQPAPSLRWLFNGSVLNETSFIFTEFLEPaane-TVRHGCLRLNQPTHVNNNGNYTLAANPFGQASASIMAAFMDNPFENPE</p>                                                                                 |
| 776 | <p><b>3bcpA</b><br/>(124)</p> <p><b>3bcoA</b><br/>(124)</p> | N | 98.39 | <p><b>TM-align:</b> aliSize=103 (resi) RMSD=0.94 (Å)<br/> kesaaakferqhmdsgnsa-----SSSNYCNQMM--RKMTQGKCKPVNTFVHESLADVKAVCSSQKVTCKDGTQNCYQSKSTMRTDCRETGSSKYPNCAYKTTQVEKHIIVACGGKPSVPVHFDASV<br/> -----kesaaakferqhmdsgnsaSSSNYCNQMMccRKMTQGKCKPVNTFVHESLADVKAVCSSQKVTCKDGTQNCYQSKSTMRTDCRETGSSKYPNCAYKTTQVEKHIIVACGGKPSVPVHFDASV</p> <p><b>SARST:</b> aliSize=119 (resi) RMSD=11.47 (Å)<br/> k--ESAAAKFERQHMDSGNSASSSNYCNQMMR---KMTQGKCKPVNTFVHESLADVKAVCSSQKVTCKDGTQNCYQSKSTMRTDCRETGSSKYPNCAYKTTQVEKHIIVACGGKPSVPVHFDASV-v<br/> -kESAAAKFERQHMD-SGNSASSSNYCNQMMccRKMTQGKCKPVNTFVHESLADVKAVCSSQKVTCKDGTQNCYQSKSTMRTDCRETGSSKYPNCAYKTTQVEKHIIVACGGKPSVPVHFDASV-v</p> <p><b>BLAST:</b> aliSize=122 (resi) iden=100.00% (122/124) simi=100.00% (122/124)<br/> KESAAAKFERQHMDSGNSASSSNYCNQMM--RKMTQGKCKPVNTFVHESLADVKAVCSSQKVTCKDGTQNCYQSKSTMRTDCRETGSSKYPNCAYKTTQVEKHIIVACGGKPSVPVHFDASV<br/> KESAAAKFERQHMDSGNSASSSNYCNQMMccRKMTQGKCKPVNTFVHESLADVKAVCSSQKVTCKDGTQNCYQSKSTMRTDCRETGSSKYPNCAYKTTQVEKHIIVACGGKPSVPVHFDASV</p> <p><b>Proposed:</b> aliSize=124 (resi) RMSD=0.97 (Å)<br/> KESAAAKFERQHMDSGNSASSSNYCNQMMYYRKMTQGKCKPVNTFVHESLADVKAVCSSQKVTCKDGTQNCYQSKSTMRTDCRETGSSKYPNCAYKTTQVEKHIIVACGGKPSVPVHFDASV<br/> KESAAAKFERQHMDSGNSASSSNYCNQMMCCRKMTQGKCKPVNTFVHESLADVKAVCSSQKVTCKDGTQNCYQSKSTMRTDCRETGSSKYPNCAYKTTQVEKHIIVACGGKPSVPVHFDASV</p> |

|     |                                                     |   |       |                                                                                                                                                                                                                                                                                                                                                                                                                                                                                                                                                                                                                                                                                                                                                                                                                                                                                                                                                                                                                                                                                                                                                                                                                                                                                                                                                                                    |
|-----|-----------------------------------------------------|---|-------|------------------------------------------------------------------------------------------------------------------------------------------------------------------------------------------------------------------------------------------------------------------------------------------------------------------------------------------------------------------------------------------------------------------------------------------------------------------------------------------------------------------------------------------------------------------------------------------------------------------------------------------------------------------------------------------------------------------------------------------------------------------------------------------------------------------------------------------------------------------------------------------------------------------------------------------------------------------------------------------------------------------------------------------------------------------------------------------------------------------------------------------------------------------------------------------------------------------------------------------------------------------------------------------------------------------------------------------------------------------------------------|
| 777 | <p>3bcpA<br/>(124)</p> <hr/> <p>3bcmA<br/>(119)</p> | N | 98.32 | <p>TM-align: aliSize=101 (resi) RMSD=0.75 (Å)<br/> kesaaakferqhmdsgnsass-----SSNYCNQMM--RKMTQGKCKPVNTFVHESLADVKAVCSQKKVTCKDGTQNCYQSKSTMRI TDCRETGSSKYPNCAYKTTQVEKHI IVACGGKPSVPVHFDASV<br/> -----kesaaakferqhmdsgS--SSNYCNQMMccRKMTQGKCKPVNTFVHESLADVKAVCSQKKVTCKDGTQNCYQSKSTMRI TDCRETGSSKYPNCAYKTTQVEKHI IVACGGKPSVPVHFDASV</p> <p>SARST: aliSize=117 (resi) RMSD=14.41 (Å)<br/> k-ESAAAKFERQHMDsgnSASSSSNYCNQMMRKMTQGKCKPVNTFVHESLADVKAVCSQKKVTCKDGTQNCYQSKSTMRI TDCRETGSSKYPNCAYKTTQVEKHI IVACGGKPSVPVHFDAS -v<br/> -kESAAAKFERQHMD--SGS--SSNYCNQMMCCRKMTQGKCKPVNTFVHESLADVKAVCSQKKVTCKDGTQNCYQSKSTMRI TDCRETGSSKYPNCAYKTTQVEKHI IVACGGKPSVPVHFDASv-</p> <p>BLAST: aliSize=117 (resi) iden=98.32% (117/119) simi=98.32% (117/119)<br/> KESAAAKFERQHMDSGnsassSSNYCNQMM--RKMTQGKCKPVNTFVHESLADVKAVCSQKKVTCKDGTQNCYQSKSTMRI TDCRETGSSKYPNCAYKTTQVEKHI IVACGGKPSVPVHFDASV<br/> KESAAAKFERQHMDSG----SSNYCNQMMccRKMTQGKCKPVNTFVHESLADVKAVCSQKKVTCKDGTQNCYQSKSTMRI TDCRETGSSKYPNCAYKTTQVEKHI IVACGGKPSVPVHFDASV</p> <p>Proposed: aliSize=119 (resi) RMSD=0.72 (Å)<br/> KESAAAKFERQHMDSGnsassSSNYCNQMMYYRKMTQGKCKPVNTFVHESLADVKAVCSQKKVTCKDGTQNCYQSKSTMRI TDCRETGSSKYPNCAYKTTQVEKHI IVACGGKPSVPVHFDASV<br/> KESAAAKFERQHMDSG----SSNYCNQMMCCRKMTQGKCKPVNTFVHESLADVKAVCSQKKVTCKDGTQNCYQSKSTMRI TDCRETGSSKYPNCAYKTTQVEKHI IVACGGKPSVPVHFDASV</p>                                          |
| 778 | <p>3bcpA<br/>(124)</p> <hr/> <p>ljs0A<br/>(124)</p> | N | 74.19 | <p>TM-align: aliSize=92 (resi) RMSD=1.49 (Å)<br/> kesaaakferqhmdsgnsa-----SSSSNYCNQMM--RKMTQGKCKPVNTFVHESLADVKAVCSQKKVTCKDGTQNCYQSKSTMRI TDCRETGSSKYPNCAYKTTQVEKHI IVACGGKPSVPVHFDASV-----<br/> -----ketaaakferqhmds tsaaSSSSNYCNQMMksrNLTJKDRCKPVNTFVHESLADVQAVCSQKNVACKNGOTNCYQSYSTMSITDCRETGSSKYPNCAYKTTQANKHI IVACEGNYVPVHFDASv-----pyvpvhfdasv</p> <p>SARST: aliSize=120 (resi) RMSD=15.35 (Å)<br/> k-ESAAAKFERQHMDSGNSASSSSNYCNQMMR--KMTQGKCKPVNTFVHESLADVKAVCSQKKVTCKDGTQNCYQSKSTMRI TDCRETGSSKYPNCAYKTTQVEKHI IVACGGKPSVPVHFDAS -v<br/> -kETAAAKFERQHMDSSTSAASSSSNYCNQMMksrNLTJKDRCKPVNTFVHESLADVQAVCSQKNVACKNGOTNCYQSYSTMSITDCRETGSSKYPNCAYKTTQANKHI IVACEGNYVPVHFDASv-</p> <p>BLAST: aliSize=109 (resi) iden=83.61% (102/124) simi=89.34% (109/124)<br/> KESAAAKFERQHMDSGNSASSSSNYCNQMM--RKMTQGKCKPVNTFVHESLADVKAVCSQKKVTCKDGTQNCYQSKSTMRI TDCRETGSSKYPNCAYKTTQVEKHI IVACGGKPSVPVHFDASV<br/> KETAAAKFERQHMDSSTSAASSSSNYCNQMMksrNLTJKDRCKPVNTFVHESLADVQAVCSQKNVACKNGOTNCYQSYSTMSITDCRETGSSKYPNCAYKTTQANKHI IVACEGNYVPVHFDASV</p> <p>Proposed: aliSize=112 (resi) RMSD=1.03 (Å)<br/> KESAAAKFERQHMDSGNSA-sSSSSNYCNQMMYYRKMTQGKCKPVNTFVHESLADVKAVCSQKKVTCKDGTQNCYQSKSTMRI TDCRETGSSKYPNCAYKTTQVEKHI IVACGGK-----psvpvhfdasv<br/> KETAAAKFERQHMDSSTSAa-SSSSNYCNQMMksrNLTJKDRCKPVNTFVHESLADVQAVCSQKNVACKNGOTNCYQSYSTMSITDCRETGSSKYPNCAYKTTQANKHI IVACEGNYpyvpvhfdasv-----</p> |
| 779 | <p>3bcpA<br/>(124)</p> <hr/> <p>ljs0A<br/>(124)</p> | C | 69.35 | <p>TM-align: aliSize=92 (resi) RMSD=1.49 (Å)<br/> kesaaakferqhmdsgnsa-----SSSSNYCNQMM--RKMTQGKCKPVNTFVHESLADVKAVCSQKKVTCKDGTQNCYQSKSTMRI TDCRETGSSKYPNCAYKTTQVEKHI IVACGGKpsvpvhfdasv-----<br/> -----ketaaakferqhmds tsaaSSSSNYCNQMMksrNLTJKDRCKPVNTFVHESLADVQAVCSQKNVACKNGOTNCYQSYSTMSITDCRETGSSKYPNCAYKTTQANKHI IVACEGN-----pyvpvhfdasv</p> <p>SARST: aliSize=120 (resi) RMSD=15.35 (Å)<br/> k-ESAAAKFERQHMDSGNSASSSSNYCNQMMR--KMTQGKCKPVNTFVHESLADVKAVCSQKKVTCKDGTQNCYQSKSTMRI TDCRETGSSKYPNCAYKTTQVEKHI IVACGGKPSVPVHFDAS -v<br/> -kETAAAKFERQHMDSSTSAASSSSNYCNQMMksrNLTJKDRCKPVNTFVHESLADVQAVCSQKNVACKNGOTNCYQSYSTMSITDCRETGSSKYPNCAYKTTQANKHI IVACEGNPYVPVHFDASv-</p> <p>BLAST: aliSize=109 (resi) iden=83.61% (102/124) simi=89.34% (109/124)<br/> KESAAAKFERQHMDSGNSASSSSNYCNQMM--RKMTQGKCKPVNTFVHESLADVKAVCSQKKVTCKDGTQNCYQSKSTMRI TDCRETGSSKYPNCAYKTTQVEKHI IVACGGKPSVPVHFDASV<br/> KETAAAKFERQHMDSSTSAASSSSNYCNQMMksrNLTJKDRCKPVNTFVHESLADVQAVCSQKNVACKNGOTNCYQSYSTMSITDCRETGSSKYPNCAYKTTQANKHI IVACEGNPYVPVHFDASV</p> <p>Proposed: aliSize=104 (resi) RMSD=0.91 (Å)<br/> kesaaakferqhmdsgnsas-----SSSSNYCNQMMYYRKMTQGKCKPVNTFVHESLADVKAVCSQKKVTCKDGTQNCYQSKSTMRI TDCRETGSSKYPNCAYKTTQVEKHI IVACGGKPSVPVHFDASV<br/> -----ketaaakferqhmds tsaaSSSSNYCNQMMksrNLTJKDRCKPVNTFVHESLADVQAVCSQKNVACKNGOTNCYQSYSTMSITDCRETGSSKYPNCAYKTTQANKHI IVACEGNPYVPVHFDASV</p>            |

|     |                                                     |   |       |                                                                                                                                                                                                                                                                                                                                                                                                                                                                                                                                                                                                                                                                                                                                                                                                                                                                                                                                                                                                                                                                                                                                                                                                                                                                                                                                                                                                                                                                                                                                                                                                                |
|-----|-----------------------------------------------------|---|-------|----------------------------------------------------------------------------------------------------------------------------------------------------------------------------------------------------------------------------------------------------------------------------------------------------------------------------------------------------------------------------------------------------------------------------------------------------------------------------------------------------------------------------------------------------------------------------------------------------------------------------------------------------------------------------------------------------------------------------------------------------------------------------------------------------------------------------------------------------------------------------------------------------------------------------------------------------------------------------------------------------------------------------------------------------------------------------------------------------------------------------------------------------------------------------------------------------------------------------------------------------------------------------------------------------------------------------------------------------------------------------------------------------------------------------------------------------------------------------------------------------------------------------------------------------------------------------------------------------------------|
| 780 | <p>3bcpA<br/>(124)</p> <hr/> <p>1r3mB<br/>(122)</p> | N | 95.90 | <p>TM-align: aliSize=102 (resi) RMSD=1.13 (Å)<br/> kesaaakferqhmds <b>gnsas</b>-----SSSNYCNQMM--RKMTQGGKCKPVNTFVHESLADVKAVCSQKKVTCKDGGTNCYQSKSTMRI TDCRETGSSKYPNCAYKTTQVEKHI IVACGGKPSVPVHFDASV<br/> -----kesaaakferqhmds <b>gnsPS</b>SNYCNLMCCRKMTQGGKCKPVNTFVHESLADVKAVCSQKKVTCKNGOTNCYQSKSTMRI TDCRETGSSKYPNCAYKTTQVEKHI IVACGGKPSVPVHFDASV</p> <p>SARST: aliSize=120 (resi) RMSD=14.43 (Å)<br/> k- <b>S</b>SAAAKFERQHMD<b>S</b>GNSA<b>S</b>SSSNYCNQMMRKMTQGGKCKPVNTFVHESLADVKAVCSQKKVTCKDGGTNCYQSKSTMRI TDCRETGSSKYPNCAYKTTQVEKHI IVACGGKPSVPVHFDAS -v<br/> -k <b>S</b>SAAAKFERQHMD<b>S</b>GNS<b>P</b>SSSNYCNLMCCRKMTQGGKCKPVNTFVHESLADVKAVCSQKKVTCKNGOTNCYQSKSTMRI TDCRETGSSKYPNCAYKTTQVEKHI IVACGGKPSVPVHFDAS v-</p> <p>BLAST: aliSize=118 (resi) iden=95.90% (117/122) simi=96.72% (118/122)<br/> <b>K</b>ESAAAKFERQHMD<b>S</b>GNSA<b>S</b>SSSNYCNQMM--RKMTQGGKCKPVNTFVHESLADVKAVCSQKKVTCKDGGTNCYQSKSTMRI TDCRETGSSKYPNCAYKTTQVEKHI IVACGGKPSVPVHFDASV<br/> <b>K</b>ESAAAKFERQHMD<b>S</b>GNS<b>P</b>SS--NYCNLMCCRKMTQGGKCKPVNTFVHESLADVKAVCSQKKVTCKNGOTNCYQSKSTMRI TDCRETGSSKYPNCAYKTTQVEKHI IVACGGKPSVPVHFDASV</p> <p>Proposed: aliSize=122 (resi) RMSD=0.85 (Å)<br/> <b>K</b>ESAAAKFERQHMD<b>S</b>GNSA<b>S</b>SSSNYCNQMMYYRKMTQGGKCKPVNTFVHESLADVKAVCSQKKVTCKDGGTNCYQSKSTMRI TDCRETGSSKYPNCAYKTTQVEKHI IVACGGKPSVPVHFDASV<br/> <b>K</b>ESAAAKFERQHMD<b>S</b>GNS<b>P</b>SS--SSNYCNLMCCRKMTQGGKCKPVNTFVHESLADVKAVCSQKKVTCKNGOTNCYQSKSTMRI TDCRETGSSKYPNCAYKTTQVEKHI IVACGGKPSVPVHFDASV</p>                                                                                                              |
| 781 | <p>1js0A<br/>(124)</p> <hr/> <p>11bgA<br/>(124)</p> | N | 72.58 | <p>TM-align: aliSize=94 (resi) RMSD=1.28 (Å)<br/> ketaaakferqhmd <b>ss</b>tsaa-----SSSNYCNQMMKSRNLTkDRCKPVNTFVHESLADVQAVCSQKNVACKNGOTNCYQSYSTMSI TDCRETGSSKYPNCAYKTTQANKHI IVAC<b>E</b>GNFYVPVHFDASV-----<br/> -----kesaaakferqhmd <b>sgn</b>spSSSNYCNLMCCRKMTQGGKCKPVNTFVHESLADVKAVCSQKKVTCKNGOTNCYQSKSTMRI TDCRETGSSKYPNCAYKTTQVEKHI IVAC<b>G</b>GKPSVPVHFDASV-----svpvhfdasv</p> <p>SARST: aliSize=121 (resi) RMSD=11.47 (Å)<br/> k- <b>S</b>TAAAKFERQHMD<b>S</b>-<b>S</b>TSAA<b>S</b>SSSNYCNQMMKSRNLTkDRCKPVNTFVHESLADVQAVCSQKNVACKNGOTNCYQSYSTMSI TDCRETGSSKYPNCAYKTTQANKHI IVAC<b>E</b>GNFYVPVHFDAS -v<br/> -k <b>S</b>SAAAKFERQHMD<b>S</b>gNS<b>P</b>SSSS--SNYCNLMCCRKMTQGGKCKPVNTFVHESLADVKAVCSQKKVTCKNGOTNCYQSKSTMRI TDCRETGSSKYPNCAYKTTQVEKHI IVAC<b>G</b>GKPSVPVHFDAS v-</p> <p>BLAST: aliSize=107 (resi) iden=81.45% (101/124) simi=86.29% (107/124)<br/> <b>K</b>ETAAAKFERQHMD<b>S</b>TSAA<b>S</b>SSSNYCNQMMKSRNLTkDRCKPVNTFVHESLADVQAVCSQKNVACKNGOTNCYQSYSTMSI TDCRETGSSKYPNCAYKTTQANKHI IVAC<b>E</b>GNFYVPVHFDASV<br/> <b>K</b>ESAAAKFERQHMD<b>S</b>GNS<b>P</b>SSSSSNYCNLMCCRKMTQGGKCKPVNTFVHESLADVKAVCSQKKVTCKNGOTNCYQSKSTMRI TDCRETGSSKYPNCAYKTTQVEKHI IVAC<b>G</b>GKPSVPVHFDASV</p> <p>Proposed: aliSize=112 (resi) RMSD=0.78 (Å)<br/> <b>K</b>ETAAAKFERQHMD<b>S</b>TSAA<b>S</b>SSSNYCNQMMKSRNLTkDRCKPVNTFVHESLADVQAVCSQKNVACKNGOTNCYQSYSTMSI TDCRETGSSKYPNCAYKTTQANKHI IVAC<b>E</b>GNFYVPVHFDASV-----pyvpvhfdasv<br/> <b>K</b>ESAAAKFERQHMD<b>S</b>-GNS<b>P</b>SSSSSNYCNLMCCRKMTQGGKCKPVNTFVHESLADVKAVCSQKKVTCKNGOTNCYQSKSTMRI TDCRETGSSKYPNCAYKTTQVEKHI IVAC<b>G</b>GKPSVPVHFDASV-----</p> |
| 782 | <p>1js0A<br/>(124)</p> <hr/> <p>11bgA<br/>(124)</p> | C | 69.35 | <p>TM-align: aliSize=94 (resi) RMSD=1.28 (Å)<br/> ketaaakferqhmd <b>ss</b>tsaa-----SSSNYCNQMMKSRNLTkDRCKPVNTFVHESLADVQAVCSQKNVACKNGOTNCYQSYSTMSI TDCRETGSSKYPNCAYKTTQANKHI IVAC<b>E</b>GNFYVPVHFDASV-----<br/> -----kesaaakferqhmd <b>sgn</b>spSSSNYCNLMCCRKMTQGGKCKPVNTFVHESLADVKAVCSQKKVTCKNGOTNCYQSKSTMRI TDCRETGSSKYPNCAYKTTQVEKHI IVAC<b>G</b>GKPSVPVHFDASV-----svpvhfdasv</p> <p>SARST: aliSize=121 (resi) RMSD=11.47 (Å)<br/> k- <b>S</b>TAAAKFERQHMD<b>S</b>-<b>S</b>TSAA<b>S</b>SSSNYCNQMMKSRNLTkDRCKPVNTFVHESLADVQAVCSQKNVACKNGOTNCYQSYSTMSI TDCRETGSSKYPNCAYKTTQANKHI IVAC<b>E</b>GNFYVPVHFDAS -v<br/> -k <b>S</b>SAAAKFERQHMD<b>S</b>gNS<b>P</b>SSSS--SNYCNLMCCRKMTQGGKCKPVNTFVHESLADVKAVCSQKKVTCKNGOTNCYQSKSTMRI TDCRETGSSKYPNCAYKTTQVEKHI IVAC<b>G</b>GKPSVPVHFDAS v-</p> <p>BLAST: aliSize=107 (resi) iden=81.45% (101/124) simi=86.29% (107/124)<br/> <b>K</b>ETAAAKFERQHMD<b>S</b>TSAA<b>S</b>SSSNYCNQMMKSRNLTkDRCKPVNTFVHESLADVQAVCSQKNVACKNGOTNCYQSYSTMSI TDCRETGSSKYPNCAYKTTQANKHI IVAC<b>E</b>GNFYVPVHFDASV<br/> <b>K</b>ESAAAKFERQHMD<b>S</b>GNS<b>P</b>SSSSSNYCNLMCCRKMTQGGKCKPVNTFVHESLADVKAVCSQKKVTCKNGOTNCYQSKSTMRI TDCRETGSSKYPNCAYKTTQVEKHI IVAC<b>G</b>GKPSVPVHFDASV</p> <p>Proposed: aliSize=104 (resi) RMSD=0.74 (Å)<br/> ketaaakferqhmd <b>ss</b>tsaa-----SSSNYCNQMMKSRNLTkDRCKPVNTFVHESLADVQAVCSQKNVACKNGOTNCYQSYSTMSI TDCRETGSSKYPNCAYKTTQANKHI IVAC<b>E</b>GNFYVPVHFDASV<br/> -----kesaaakferqhmd <b>sgn</b>spSSSNYCNLMCCRKMTQGGKCKPVNTFVHESLADVKAVCSQKKVTCKNGOTNCYQSKSTMRI TDCRETGSSKYPNCAYKTTQVEKHI IVAC<b>G</b>GKPSVPVHFDASV-----</p>                                    |

|     |                                             |   |       |                                                                                                                                                                                                                                                                                                                                                                                                                                                                                                                                                                                                                                                                                                                                                                                                                                                                                                                                                                                                                                                                                                                                                                                                                                                                                                                                                               |
|-----|---------------------------------------------|---|-------|---------------------------------------------------------------------------------------------------------------------------------------------------------------------------------------------------------------------------------------------------------------------------------------------------------------------------------------------------------------------------------------------------------------------------------------------------------------------------------------------------------------------------------------------------------------------------------------------------------------------------------------------------------------------------------------------------------------------------------------------------------------------------------------------------------------------------------------------------------------------------------------------------------------------------------------------------------------------------------------------------------------------------------------------------------------------------------------------------------------------------------------------------------------------------------------------------------------------------------------------------------------------------------------------------------------------------------------------------------------|
| 783 | <p>1js0A (124)</p> <hr/> <p>1tq9A (124)</p> | N | 72.58 | <p><b>TM-align:</b> aliSize=94 (resi) RMSD=1.71 (Å)<br/> ketaaakferqhmdsstsa-----ASSSNYCNQMMksRNLTKDRCKPVNTFVHESLADVQAVCSQKNVACKNGOTNCYQSYSTMSTDCRETGSSKYPNCAYKTTQANKHIIVACEGNFYvpvhfdasv-----<br/> -----kesaaakferqhmdsgnspSSSNYCNLM--RKMTOGKCKPVNTFVHESLADVQAVCSQKNVACKNGOTNCYQSKSTMRTDCRETGSSKYPNCAYKTTQVEKHIIVACGGKPS-----vpvhfdasv</p> <p><b>SARST:</b> aliSize=118 (resi) RMSD=12.73 (Å)<br/> k-ETAAAKFERQHMDSTsaasSSN--YCNQMMKSRLTKDRCKPVNTFVHESLADVQAVCSQKNVACKNGOTNCYQSYSTMSTDCRETGSSKYPNCAYKTTQANKHIIVACEGNFYVPVHFDAS-v<br/> -kESAAAKFERQHMDSGN---SPSsSNYCNLMRKMTOGKCKPVNTFVHESLADVQAVCSQKNVACKNGOTNCYQSKSTMRTDCRETGSSKYPNCAYKTTQVEKHIIVACGGKPSVPVHFDASv-</p> <p><b>BLAST:</b> aliSize=107 (resi) iden=82.79% (101/124) simi=87.70% (107/124)<br/> KETAAAKFERQHMDSTSAASSSNYCNQMMksRNLTKDRCKPVNTFVHESLADVQAVCSQKNVACKNGOTNCYQSYSTMSTDCRETGSSKYPNCAYKTTQANKHIIVACEGNFYVPVHFDASV<br/> KESAAAKFERQHMDSGNSPSSSNYCNLM--RKMTOGKCKPVNTFVHESLADVQAVCSQKNVACKNGOTNCYQSKSTMRTDCRETGSSKYPNCAYKTTQVEKHIIVACGGKPSVPVHFDASV</p> <p><b>Proposed:</b> aliSize=112 (resi) RMSD=0.78 (Å)<br/> KETAAAKFERQHMDSTsaasSSNYCNQMMksRNLTKDRCKPVNTFVHESLADVQAVCSQKNVACKNGOTNCYQSYSTMSTDCRETGSSKYPNCAYKTTQANKHIIVACEGN-----pyvpvhfdasv<br/> KESAAAKFERQHMDSGN-SPSsSNYCNLMYYRKMTOGKCKPVNTFVHESLADVQAVCSQKNVACKNGOTNCYQSKSTMRTDCRETGSSKYPNCAYKTTQVEKHIIVACGGKPSvpvhfdasv-----</p> |
| 784 | <p>1js0A (124)</p> <hr/> <p>1tq9A (124)</p> | C | 69.35 | <p><b>TM-align:</b> aliSize=94 (resi) RMSD=1.71 (Å)<br/> ketaaakferqhmdsstsa-----ASSSNYCNQMMksRNLTKDRCKPVNTFVHESLADVQAVCSQKNVACKNGOTNCYQSYSTMSTDCRETGSSKYPNCAYKTTQANKHIIVACEGNFYvpvhfdasv-----<br/> -----kesaaakferqhmdsgnspSSSNYCNLM--RKMTOGKCKPVNTFVHESLADVQAVCSQKNVACKNGOTNCYQSKSTMRTDCRETGSSKYPNCAYKTTQVEKHIIVACGGKPS-----vpvhfdasv</p> <p><b>SARST:</b> aliSize=118 (resi) RMSD=12.73 (Å)<br/> k-ETAAAKFERQHMDSTsaasSSN--YCNQMMKSRLTKDRCKPVNTFVHESLADVQAVCSQKNVACKNGOTNCYQSYSTMSTDCRETGSSKYPNCAYKTTQANKHIIVACEGNFYVPVHFDAS-v<br/> -kESAAAKFERQHMDSGN---SPSsSNYCNLMRKMTOGKCKPVNTFVHESLADVQAVCSQKNVACKNGOTNCYQSKSTMRTDCRETGSSKYPNCAYKTTQVEKHIIVACGGKPSVPVHFDASv-</p> <p><b>BLAST:</b> aliSize=107 (resi) iden=82.79% (101/124) simi=87.70% (107/124)<br/> KETAAAKFERQHMDSTSAASSSNYCNQMMksRNLTKDRCKPVNTFVHESLADVQAVCSQKNVACKNGOTNCYQSYSTMSTDCRETGSSKYPNCAYKTTQANKHIIVACEGNFYVPVHFDASV<br/> KESAAAKFERQHMDSGNSPSSSNYCNLM--RKMTOGKCKPVNTFVHESLADVQAVCSQKNVACKNGOTNCYQSKSTMRTDCRETGSSKYPNCAYKTTQVEKHIIVACGGKPSVPVHFDASV</p> <p><b>Proposed:</b> aliSize=104 (resi) RMSD=0.66 (Å)<br/> ketaaakferqhmdsstsa-----SSSNYCNQMMksRNLTKDRCKPVNTFVHESLADVQAVCSQKNVACKNGOTNCYQSYSTMSTDCRETGSSKYPNCAYKTTQANKHIIVACEGNFYVPVHFDASV<br/> -----kesaaakferqhmdsgnspSSSNYCNLMYYRKMTOGKCKPVNTFVHESLADVQAVCSQKNVACKNGOTNCYQSKSTMRTDCRETGSSKYPNCAYKTTQVEKHIIVACGGKPSVPVHFDASV</p>  |
| 785 | <p>1js0A (124)</p> <hr/> <p>1r3mB (122)</p> | C | 81.15 | <p><b>TM-align:</b> aliSize=112 (resi) RMSD=1.21 (Å)<br/> KETAAAKFERQHMDSTsaAsSSNYCNQMMksRNLTKDRCKPVNTFVHESLADVQAVCSQKNVACKNGOTNCYQSYSTMSTDCRETGSSKYPNCAYKTTQANKHIIVACEGNFYvpvhfdasv-----<br/> KESAAAKFERQHMDSG-NSP-SSNYCNLMCCRKMTOGKCKPVNTFVHESLADVQAVCSQKNVACKNGOTNCYQSKSTMRTDCRETGSSKYPNCAYKTTQVEKHIIVACGGKPS-----svvpvhfdasv</p> <p><b>SARST:</b> aliSize=120 (resi) RMSD=6.44 (Å)<br/> k-ETAAAKFERQHMDSTsaAsSSNYCNQMMksRNLTKDRCKPVNTFVHESLADVQAVCSQKNVACKNGOTNCYQSYSTMSTDCRETGSSKYPNCAYKTTQANKHIIVACEGNFYVPVHFDAS-v<br/> -kESAAAKFERQHMD--SGNSPSSNYCNLMCCRKMTOGKCKPVNTFVHESLADVQAVCSQKNVACKNGOTNCYQSKSTMRTDCRETGSSKYPNCAYKTTQVEKHIIVACGGKPSVPVHFDASv-</p> <p><b>BLAST:</b> aliSize=105 (resi) iden=81.97% (100/122) simi=86.07% (105/122)<br/> KETAAAKFERQHMDSTsaAsSSNYCNQMMksRNLTKDRCKPVNTFVHESLADVQAVCSQKNVACKNGOTNCYQSYSTMSTDCRETGSSKYPNCAYKTTQANKHIIVACEGNFYVPVHFDASV<br/> KESAAAKFERQHMDSGNSP--SSNYCNLMCCRKMTOGKCKPVNTFVHESLADVQAVCSQKNVACKNGOTNCYQSKSTMRTDCRETGSSKYPNCAYKTTQVEKHIIVACGGKPSVPVHFDASV</p> <p><b>Proposed:</b> aliSize=122 (resi) RMSD=0.79 (Å)<br/> KETAAAKFERQHMDSTsaAsSSNYCNQMMksRNLTKDRCKPVNTFVHESLADVQAVCSQKNVACKNGOTNCYQSYSTMSTDCRETGSSKYPNCAYKTTQANKHIIVACEGNFYVPVHFDASV<br/> KESAAAKFERQHMDSG-NSP-SSNYCNLMCCRKMTOGKCKPVNTFVHESLADVQAVCSQKNVACKNGOTNCYQSKSTMRTDCRETGSSKYPNCAYKTTQVEKHIIVACGGKPSVPVHFDASV</p>                   |

|     |   |       |                                                                                                                                                                                                                                                                                                                                                                                                                                                                                                                                                                                                                                                                                                                                                                                                                                                                                                                                                                                                                                                                                                                                                                                                                                                                                                                                                                         |
|-----|---|-------|-------------------------------------------------------------------------------------------------------------------------------------------------------------------------------------------------------------------------------------------------------------------------------------------------------------------------------------------------------------------------------------------------------------------------------------------------------------------------------------------------------------------------------------------------------------------------------------------------------------------------------------------------------------------------------------------------------------------------------------------------------------------------------------------------------------------------------------------------------------------------------------------------------------------------------------------------------------------------------------------------------------------------------------------------------------------------------------------------------------------------------------------------------------------------------------------------------------------------------------------------------------------------------------------------------------------------------------------------------------------------|
| 786 | N | 72.58 | <p><b>TM-align:</b> aliSize=94 (resi) RMSD=1.44 (Å)<br/> ketaaakferqhmdsstaa-----SSSNYCNQMMKSRNLTKDRCKPVNTFVHESLADVQAVCSQKNACKNGOTNCYQSYSTMSITDCRETGSSKYPNCAYKTTQANKHIIVACEINPYvpvhfdasv-----<br/> -----kesaakferqhmdsgnspSSSNYCNLMCCRKMTQKCKPVNTFVHESLADVKAVCSQKVTCKNGOTNCYQSKSTMRIIDCRETGSSKYPNCAYKTTQVEKHIIVACGGKPSVPVHFDASV-----svpvhfdasv</p> <p><b>SARST:</b> aliSize=121 (resi) RMSD=11.44 (Å)<br/> k-ETAAAKFERQHMDs-STSAASsSNYCNQMMKSRNLTKDRCKPVNTFVHESLADVQAVCSQKNACKNGOTNCYQSYSTMSITDCRETGSSKYPNCAYKTTQANKHIIVACEINPYVPVHFDAS-v<br/> -kESAAAKFERQHMDsgNSPSSS-SNYCNLMCCRKMTQKCKPVNTFVHESLADVKAVCSQKVTCKNGOTNCYQSKSTMRIIDCRETGSSKYPNCAYKTTQVEKHIIVACGGKPSVPVHFDASv-</p> <p><b>BLAST:</b> aliSize=107 (resi) iden=81.45% (101/124) simi=86.29% (107/124)<br/> KETAAAKFERQHMDsSTSAASsSNYCNQMMKSRNLTKDRCKPVNTFVHESLADVQAVCSQKNACKNGOTNCYQSYSTMSITDCRETGSSKYPNCAYKTTQANKHIIVACEINPYVPVHFDASV<br/> KESAAAKFERQHMDsgNSPSSS-SNYCNLMCCRKMTQKCKPVNTFVHESLADVKAVCSQKVTCKNGOTNCYQSKSTMRIIDCRETGSSKYPNCAYKTTQVEKHIIVACGGKPSVPVHFDASV</p> <p><b>Proposed:</b> aliSize=112 (resi) RMSD=0.91 (Å)<br/> KETAAAKFERQHMDsTSA-ASSSNYCNQMMKSRNLTKDRCKPVNTFVHESLADVQAVCSQKNACKNGOTNCYQSYSTMSITDCRETGSSKYPNCAYKTTQANKHIIVACEIN-----pyvpvhfdasv<br/> KESAAAKFERQHMDs-GNSpSSSNYCNLMCCRKMTQKCKPVNTFVHESLADVKAVCSQKVTCKNGOTNCYQSKSTMRIIDCRETGSSKYPNCAYKTTQVEKHIIVACGGKPSVPVHFDASv-----</p> |
| 787 | C | 68.55 | <p><b>TM-align:</b> aliSize=94 (resi) RMSD=1.44 (Å)<br/> ketaaakferqhmdsstaa-----SSSNYCNQMMKSRNLTKDRCKPVNTFVHESLADVQAVCSQKNACKNGOTNCYQSYSTMSITDCRETGSSKYPNCAYKTTQANKHIIVACEINPYvpvhfdasv-----<br/> -----kesaakferqhmdsgnspSSSNYCNLMCCRKMTQKCKPVNTFVHESLADVKAVCSQKVTCKNGOTNCYQSKSTMRIIDCRETGSSKYPNCAYKTTQVEKHIIVACGGKPSVPVHFDASV-----svpvhfdasv</p> <p><b>SARST:</b> aliSize=121 (resi) RMSD=11.44 (Å)<br/> k-ETAAAKFERQHMDs-STSAASsSNYCNQMMKSRNLTKDRCKPVNTFVHESLADVQAVCSQKNACKNGOTNCYQSYSTMSITDCRETGSSKYPNCAYKTTQANKHIIVACEINPYVPVHFDAS-v<br/> -kESAAAKFERQHMDsgNSPSSS-SNYCNLMCCRKMTQKCKPVNTFVHESLADVKAVCSQKVTCKNGOTNCYQSKSTMRIIDCRETGSSKYPNCAYKTTQVEKHIIVACGGKPSVPVHFDASv-</p> <p><b>BLAST:</b> aliSize=107 (resi) iden=81.45% (101/124) simi=86.29% (107/124)<br/> KETAAAKFERQHMDsSTSAASsSNYCNQMMKSRNLTKDRCKPVNTFVHESLADVQAVCSQKNACKNGOTNCYQSYSTMSITDCRETGSSKYPNCAYKTTQANKHIIVACEINPYVPVHFDASV<br/> KESAAAKFERQHMDsgNSPSSS-SNYCNLMCCRKMTQKCKPVNTFVHESLADVKAVCSQKVTCKNGOTNCYQSKSTMRIIDCRETGSSKYPNCAYKTTQVEKHIIVACGGKPSVPVHFDASV</p> <p><b>Proposed:</b> aliSize=103 (resi) RMSD=0.70 (Å)<br/> ketaaakferqhmdsstsaas-----SSSNYCNQMMKSRNLTKDRCKPVNTFVHESLADVQAVCSQKNACKNGOTNCYQSYSTMSITDCRETGSSKYPNCAYKTTQANKHIIVACEINPYVPVHFDASV<br/> -----kesaakferqhmdsgnspSSSNYCNLMCCRKMTQKCKPVNTFVHESLADVKAVCSQKVTCKNGOTNCYQSKSTMRIIDCRETGSSKYPNCAYKTTQVEKHIIVACGGKPSVPVHFDASV</p>  |
| 788 | N | 72.58 | <p><b>TM-align:</b> aliSize=95 (resi) RMSD=1.58 (Å)<br/> ketaaakferqhmdsstsa-----SSSNYCNQMMKSRNLTKDRCKPVNTFVHESLADVQAVCSQKNACKNGOTNCYQSYSTMSITDCRETGSSKYPNCAYKTTQANKHIIVACEINPYvpvhfdasv-----<br/> -----kesaakferqhmdsgnspSSSNYCNLMCCRKMTQKCKPVNTFVHESLADVKAVCSQKVTCKNGOTNCYQSKSTMRIIDCRETGSSKYPNCAYKTTQVEKHIIVACGGKPS-----vpvhfdasv</p> <p><b>SARST:</b> aliSize=121 (resi) RMSD=11.43 (Å)<br/> k-ETAAAKFERQHMDs-STSAASsSNYCNQMMKSRNLTKDRCKPVNTFVHESLADVQAVCSQKNACKNGOTNCYQSYSTMSITDCRETGSSKYPNCAYKTTQANKHIIVACEINPYVPVHFDAS-v<br/> -kESAAAKFERQHMDsgNSPSSS-SNYCNLMCCRKMTQKCKPVNTFVHESLADVKAVCSQKVTCKNGOTNCYQSKSTMRIIDCRETGSSKYPNCAYKTTQVEKHIIVACGGKPSVPVHFDASv-</p> <p><b>BLAST:</b> aliSize=107 (resi) iden=81.45% (101/124) simi=86.29% (107/124)<br/> KETAAAKFERQHMDsSTSAASsSNYCNQMMKSRNLTKDRCKPVNTFVHESLADVQAVCSQKNACKNGOTNCYQSYSTMSITDCRETGSSKYPNCAYKTTQANKHIIVACEINPYVPVHFDASV<br/> KESAAAKFERQHMDsgNSPSSS-SNYCNLMCCRKMTQKCKPVNTFVHESLADVKAVCSQKVTCKNGOTNCYQSKSTMRIIDCRETGSSKYPNCAYKTTQVEKHIIVACGGKPSVPVHFDASV</p> <p><b>Proposed:</b> aliSize=112 (resi) RMSD=0.76 (Å)<br/> KETAAAKFERQHMDsTSA-ASSSNYCNQMMKSRNLTKDRCKPVNTFVHESLADVQAVCSQKNACKNGOTNCYQSYSTMSITDCRETGSSKYPNCAYKTTQANKHIIVACEIN-----pyvpvhfdasv<br/> KESAAAKFERQHMDs-GNSpSSSNYCNLMCCRKMTQKCKPVNTFVHESLADVKAVCSQKVTCKNGOTNCYQSKSTMRIIDCRETGSSKYPNCAYKTTQVEKHIIVACGGKPSVPVHFDASv-----</p>           |

|     |                                                     |   |       |                                                                                                                                                                                                                                                                                                                                                                                                                                                                                                                                                                                                                                                                                                                                                                                                                                                                                                                                                                                                                                                                                                                                                                                                                                                                                                                                                                |
|-----|-----------------------------------------------------|---|-------|----------------------------------------------------------------------------------------------------------------------------------------------------------------------------------------------------------------------------------------------------------------------------------------------------------------------------------------------------------------------------------------------------------------------------------------------------------------------------------------------------------------------------------------------------------------------------------------------------------------------------------------------------------------------------------------------------------------------------------------------------------------------------------------------------------------------------------------------------------------------------------------------------------------------------------------------------------------------------------------------------------------------------------------------------------------------------------------------------------------------------------------------------------------------------------------------------------------------------------------------------------------------------------------------------------------------------------------------------------------|
| 789 | <p>1js0A<br/>(124)</p> <hr/> <p>1lbaA<br/>(124)</p> | C | 68.55 | <p><b>TM-align:</b> aliSize=95 (resi) RMSD=1.58 (Å)<br/> ketaaakferqhmdsstsa-----SSSNYCNQMMKSRNLTKDRCKPVNTFVHESLADVAVCSQKNACKNGOTNCYOSYSTMSITDCRETGSSKYPNCAYKTTQANKHIIVACEGNFPYVPVHFDASv-----<br/> -----kesaaakferqhmdsgnpsSSSNYCNLMCCRKMTQGGCKPVNTFVHESLADVKAVCSQKVTCKNGOTNCYOSKSTMRIIDCRETGSSKYPNCAYKTTQVEKHIIVACGGKPSVPVHFDASv-----v</p> <p><b>SARST:</b> aliSize=121 (resi) RMSD=11.43 (Å)<br/> k-ETAAAKFERQHMDs-STSAAsSNYCNQMMKSRNLTKDRCKPVNTFVHESLADVAVCSQKNACKNGOTNCYOSYSTMSITDCRETGSSKYPNCAYKTTQANKHIIVACEGNFPYVPVHFDASv-<br/> -kESAAAKFERQHMDsgNSPSSsSNYCNLMCCRKMTQGGCKPVNTFVHESLADVKAVCSQKVTCKNGOTNCYOSKSTMRIIDCRETGSSKYPNCAYKTTQVEKHIIVACGGKPSVPVHFDASv-</p> <p><b>BLAST:</b> aliSize=107 (resi) iden=81.45% (101/124) simi=86.29% (107/124)<br/> KETAAAKFERQHMDSTSAAsSNYCNQMMKSRNLTKDRCKPVNTFVHESLADVAVCSQKNACKNGOTNCYOSYSTMSITDCRETGSSKYPNCAYKTTQANKHIIVACEGNFPYVPVHFDASv<br/> KESAAAKFERQHMDsgNSPSSsSNYCNLMCCRKMTQGGCKPVNTFVHESLADVKAVCSQKVTCKNGOTNCYOSKSTMRIIDCRETGSSKYPNCAYKTTQVEKHIIVACGGKPSVPVHFDASv</p> <p><b>Proposed:</b> aliSize=103 (resi) RMSD=0.50 (Å)<br/> ketaaakferqhmdsstsaas-----SSSNYCNQMMKSRNLTKDRCKPVNTFVHESLADVAVCSQKNACKNGOTNCYOSYSTMSITDCRETGSSKYPNCAYKTTQANKHIIVACEGNFPYVPVHFDASv<br/> -----kesaaakferqhmdsgnpsSSSNYCNLMCCRKMTQGGCKPVNTFVHESLADVKAVCSQKVTCKNGOTNCYOSKSTMRIIDCRETGSSKYPNCAYKTTQVEKHIIVACGGKPSVPVHFDASv</p> |
| 790 | <p>1r5dA<br/>(124)</p> <hr/> <p>1a2wA<br/>(124)</p> | N | 80.65 | <p><b>TM-align:</b> aliSize=104 (resi) RMSD=0.90 (Å)<br/> kesaaakferqhmdsgnps-----SSSNYCNLMCCRKMTQGGCKPVNTFVHESLADVKAVCSQKVTCKNGOTNCYOSKSTMRIIDCRETGSSKYPNCAYKTTQVEKHIIVACGGKPSVPVHFDASv<br/> -----ketaaakferqhmdsstsaasSNYCNQMMKSRNLTKDRCKPVNTFVHESLADVAVCSQKNACKNGOTNCYOSYSTMSITDCRETGSSKYPNCAYKTTQANKHIIVACEGNFPYVPVHFDASv</p> <p><b>SARST:</b> aliSize=118 (resi) RMSD=12.33 (Å)<br/> k-ESAAAKFERQHMDsgnpsPS--SS--SNYCNLMCCRKMTQGGCKPVNTFVHESLADVKAVCSQKVTCKNGOTNCYOSKSTMRIIDCRETGSSKYPNCAYKTTQVEKHIIVACGGKPSVPVHFDASv-<br/> -kETAAAKFERQHMD----SStsAAsSNYCNQMMKSRNLTKDRCKPVNTFVHESLADVAVCSQKNACKNGOTNCYOSYSTMSITDCRETGSSKYPNCAYKTTQANKHIIVACEGNFPYVPVHFDASv-</p> <p><b>BLAST:</b> aliSize=107 (resi) iden=81.45% (101/124) simi=86.29% (107/124)<br/> KESAAAKFERQHMDsgNSPSSsSNYCNLMCCRKMTQGGCKPVNTFVHESLADVKAVCSQKVTCKNGOTNCYOSKSTMRIIDCRETGSSKYPNCAYKTTQVEKHIIVACGGKPSVPVHFDASv<br/> KETAAAKFERQHMDsSTSAAsSNYCNQMMKSRNLTKDRCKPVNTFVHESLADVAVCSQKNACKNGOTNCYOSYSTMSITDCRETGSSKYPNCAYKTTQANKHIIVACEGNFPYVPVHFDASv</p> <p><b>Proposed:</b> aliSize=123 (resi) RMSD=0.92 (Å)<br/> KESAAAKFERQHMDs-GNSpSSsSNYCNLMCCRKMTQGGCKPVNTFVHESLADVKAVCSQKVTCKNGOTNCYOSKSTMRIIDCRETGSSKYPNCAYKTTQVEKHIIVACGGKPSVPVHFDASv<br/> KETAAAKFERQHMDsSTSAAsSNYCNQMMKSRNLTKDRCKPVNTFVHESLADVAVCSQKNACKNGOTNCYOSYSTMSITDCRETGSSKYPNCAYKTTQANKHIIVACEGNFPYVPVHFDASv</p>            |
| 791 | <p>1r5dA<br/>(124)</p> <hr/> <p>1h8xA<br/>(125)</p> | N | 71.77 | <p><b>TM-align:</b> aliSize=103 (resi) RMSD=1.37 (Å)<br/> kesaaakferqhmdsgnps-----SSSNYCNLMCCRKMTQGGCKPVNTFVHESLADVAVCSQKVTCKNGOTNCYOSKSTMRIIDCRETGSSKYPNCAYKTTQVEKHIIVACGGKPSVPVHFDASv-<br/> -----kesaaakferqhmdsgnpsSSSYCNQMMRRRNMTOGRCKPVNTFVHEPLVDVQNVCFQEKVTCKNGGNCYKNSSMHIIDCRLINGSRYPNCAYRTSOKERHIIVACEGSPYVPVHFDASve</p> <p><b>SARST:</b> aliSize=120 (resi) RMSD=11.86 (Å)<br/> k-ESAAAKFERQHMD--SGNSPSSsSNYCNLMCCRKMTQGGCKPVNTFVHESLADVAVCSQKVTCKNGOTNCYOSKSTMRIIDCRETGSSKYPNCAYKTTQVEKHIIVACGGKPSVPVHFDASv-<br/> -kESAAAKFERQHMDsgNSPSSs--TYCNQMMRRRNMTOGRCKPVNTFVHEPLVDVQNVCFQEKVTCKNGGNCYKNSSMHIIDCRLINGSRYPNCAYRTSOKERHIIVACEGSPYVPVHFDASve-</p> <p><b>BLAST:</b> aliSize=105 (resi) iden=77.42% (96/124) simi=84.68% (105/124)<br/> KESAAAKFERQHMDsgNSPSSsSNYCNLMCCRKMTQGGCKPVNTFVHESLADVAVCSQKVTCKNGOTNCYOSKSTMRIIDCRETGSSKYPNCAYKTTQVEKHIIVACGGKPSVPVHFDASv-<br/> KESAAAKFERQHMDsgNSPSSsTYCNQMMRRRNMTOGRCKPVNTFVHEPLVDVQNVCFQEKVTCKNGGNCYKNSSMHIIDCRLINGSRYPNCAYRTSOKERHIIVACEGSPYVPVHFDASve</p> <p><b>Proposed:</b> aliSize=122 (resi) RMSD=1.01 (Å)<br/> KESAAAKFERQHMDsgnSPS-SSSNYCNLMCCRKMTQGGCKPVNTFVHESLADVAVCSQKVTCKNGOTNCYOSKSTMRIIDCRETGSSKYPNCAYKTTQVEKHIIVACGGKPSVPVHFDASv-<br/> KESAAAKFERQHMDsg-NSPSSsTYCNQMMRRRNMTOGRCKPVNTFVHEPLVDVQNVCFQEKVTCKNGGNCYKNSSMHIIDCRLINGSRYPNCAYRTSOKERHIIVACEGSPYVPVHFDASve</p>                   |



|     |                                               |   |       |                                                                                                                                                                                                                                                                                                                                                                                                                                                                                                                                                                                                                                                                                                                                                                                                                                                                                                                                                                                                                                                                                                                                                                                                                                                                                                                                                                                                                                                                                                                                                                                                                                                                                                                                                                                                                                                                                                                                                                                                                                                                                                                                                                                                                                                                                                                                                                                                                                                                                                                                                                                                                                                                                                                                                                                                                                                                                                  |
|-----|-----------------------------------------------|---|-------|--------------------------------------------------------------------------------------------------------------------------------------------------------------------------------------------------------------------------------------------------------------------------------------------------------------------------------------------------------------------------------------------------------------------------------------------------------------------------------------------------------------------------------------------------------------------------------------------------------------------------------------------------------------------------------------------------------------------------------------------------------------------------------------------------------------------------------------------------------------------------------------------------------------------------------------------------------------------------------------------------------------------------------------------------------------------------------------------------------------------------------------------------------------------------------------------------------------------------------------------------------------------------------------------------------------------------------------------------------------------------------------------------------------------------------------------------------------------------------------------------------------------------------------------------------------------------------------------------------------------------------------------------------------------------------------------------------------------------------------------------------------------------------------------------------------------------------------------------------------------------------------------------------------------------------------------------------------------------------------------------------------------------------------------------------------------------------------------------------------------------------------------------------------------------------------------------------------------------------------------------------------------------------------------------------------------------------------------------------------------------------------------------------------------------------------------------------------------------------------------------------------------------------------------------------------------------------------------------------------------------------------------------------------------------------------------------------------------------------------------------------------------------------------------------------------------------------------------------------------------------------------------------|
| 792 | <p>1g85A<br/>(159)</p> <p>2hlvA<br/>(149)</p> | C | 92.62 | <p><b>TM-align:</b> aliSize=116 (resi) RMSD=1.09 (Å)<br/> aqeaaeqnl SELSGPWRTVYIGSTNPEKIQENGFRTYFREL VFDDEKGTVDFFYSVKRDGKWNVHVKATKODDGTIVADYEGQNVFKIVSLSRTHLVAHNIIVDKHGQTTEL TGLFV KLNvededlekfwkltedkgidkknvvnflenhp-----HPE-----<br/> ----- SELSGPWRTVYIGSTNPEKIQENGFRTYFREL VFDDEKGTVDFFYSVKRDGKCNVHVKATKODDGTIVADYEGQNVFKIVSLSRTHLVAHNIIVDKHGQTTEL TGLFV KLNvededlekfwkltedkgidkknvvnflenEDCph</p> <p><b>SARST:</b> aliSize=146 (resi) RMSD=13.39 (Å)<br/> aqeaaeqnls- ELSGPWRTVYIGSTNPEKIQENGFRTYFREL VFDDEKGTVDFFYSVKRDGKWNVHVKATKODDGTIVADYEGQNVFKIVSLSRTHLVAHNIIVDKHGQTTEL TGLFV KLNVEDEDLEKFWKLTEDKGI DKKNVN FLENEHPH-pe<br/> -----s ELSGPWRTVYIGSTNPEKIQENGFRTYFREL VFDDEKGTVDFFYSVKRDGKCNVHVKATKODDGTIVADYEGQNVFKIVSLSRTHLVAHNIIVDKHGQTTEL TGLFV KGINVEDEDLEKFWKLTEDKGI DKKNVN FLENEDCPHp--</p> <p><b>BLAST:</b> aliSize=145 (resi) iden=96.64% (144/149) simi=97.32% (145/149)<br/> aqeaaeqnl SELSGPWRTVYIGSTNPEKIQENGFRTYFREL VFDDEKGTVDFFYSVKRDGKWNVHVKATKODDGTIVADYEGQNVFKIVSLSRTHLVAHNIIVDKHGQTTEL TGLFV K-LNVEDEDLEKFWKLTEDKGI DKKNVN FLENEHPHpe<br/> ----- SELSGPWRTVYIGSTNPEKIQENGFRTYFREL VFDDEKGTVDFFYSVKRDGKCNVHVKATKODDGTIVADYEGQNVFKIVSLSRTHLVAHNIIVDKHGQTTEL TGLFV KLNVEDEDLEKFWKLTEDKGI DKKNVN FLENEDCPH-</p> <p><b>Proposed:</b> aliSize=145 (resi) RMSD=0.88 (Å)<br/> aqeaaeqnl SELSGPWRTVYIGSTNPEKIQENGFRTYFREL VFDDEKGTVDFFYSVKRDGKWNVHVKATKODDGTIVADYEGQNVFKIVSLSRTHLVAHNIIVDKHGQTTEL TGLFV K-LNVEDEDLEKFWKLTEDKGI DKKNVN FLENEHPH---hpe<br/> ----- SELSGPWRTVYIGSTNPEKIQENGFRTYFREL VFDDEKGTVDFFYSVKRDGKCNVHVKATKODDGTIVADYEGQNVFKIVSLSRTHLVAHNIIVDKHGQTTEL TGLFV KLNVEDEDLEKFWKLTEDKGI DKKNVN FLENEDCph---</p>                                                                                                                                                                                                                                                                                                                                                                                                                                                                                                                                                                                                                                                                                                                                                                                                                                                                                                                                                                                                                                                                                                                                                                                                                                                  |
| 793 | <p>1oy0A<br/>(248)</p> <p>3b8iA<br/>(283)</p> | C | 15.32 | <p><b>TM-align:</b> aliSize=213 (resi) RMSD=2.88 (Å)<br/> -R---TKIRTHHLORWkaDgHKWAML TAY YSTAR FDEAIPVLLVDSAAANVV-YGYDTTVP SIDELIPLVRGVVGA PHALV VADLPFSYeAGpTAALAAATRFKdGGAHVKLEGG-----G--E-RVAEQIACLTA-A--G-IPVMAHIGFTPgDAAEOTIADAI VAEAGAFAV<br/> rAshhELRAMFA LDS--S-RCYHTASVFPMSARIAADLIFECGTLGGSVASLQVLAAPDFAL TLSEFVEQATRIGVRLPVIADADHYG-NA-LNVMRTVVELER-ACIAALTIIdtllpaqfgrks tdl icvEGVGKRAALEaRvdPaLTI IARTNAEL-IDVDAVIQRTLA YQEGADGI</p> <p>VMEMVPA-ELATQITGKTIITVIGG--A--GP---N---CDGOVLVWdMafSgaktarfvkryaDVGGELRRRAMOYAOEvaggvfpadeh-----<br/> CLVGRDFAHLEAIAEHHLPLMLVTygnpqLRddarLarlgvrVVVNGH-A-A-YF-----AAIKATYDCLRE-ERG-----avasdl tase lskkyt fpeeyqawardymevk</p> <p><b>SARST:</b> aliSize=210 (resi) RMSD=10.32 (Å)<br/> r-----TKIRTHHLORWKADgHKWAMLTaydySTARIFDEAGipvllVGSaanvvygydttvPSIDELIPLVRGVVGA PHALV VADLPFGSyeaPTAALAAATRFKdGGAHVKLEGG-----EGG-----RVAEQIACLTAAGI--PVMHIGFTPgDAAEOTIADAI VAEAGAFAV<br/> -rashhelramfralldssrcyhtaSVFDPMSARIAADLIFECGTLGGSVASLQVLA---AP-----FA-----LTLSEFVEQATRIGVRLPVIADADHYG---NALNVMRTVVELERACIAALTIIdtllpaqfgrks tdl icvEGVGKRAALEaRvdPaLTI IARTNAELIDV</p> <p>EOTIADAI VAEAGAFAVMEMV-PAELATQITGKTIITVIGG---PNCgqVVLVWDMAGfSgaktarfvkryaDVGGELRRRAMOYAOEvaggvfpadeh-----eh<br/> DAVIQRTLA YQEGADGICLVGRDFAHLEAIAEHHLPLMLVTygnpqLRD-----ARLARLGV-----RVVNGHAA YFAAIKTYDCLREERAVASdl tase lskkyt fpeeyqawardymevk--</p> <p><b>BLAST:</b> aliSize=66 (resi) iden=16.53% (41/248) simi=26.61% (66/248)<br/> rtkirthhlqrwkadghkwamltayd-----STARIFD-----EATIPVLLVDSAAANVV-YGYDTTVP SIDELIPLVRGVVGA PHALV VADLPFSYeAGpTAALAAATRFKdGGAHVKLEGGGERVAEQIACLTAAGI--PVMHIGFTPgDAAEOTIADAI VAEAGAFAV<br/> -----rashhelramfralldssrcyhtaSVFDPMSARIAADLIFECGTLGGSVASLQVLAAPDFAL TLSEFVEQATRIGVRLPVIADADHYG---NALNVMRTVVELERACIAALTIIdtllpaqfgrks tdl icvEGVGKRAALEaRvdPaLTI IARTNAELIDV</p> <p>GAFAVMEMVPAELATQITGKTIITVIGG-----aGP---N---CDGOVLVWDMAGfSgaktarfvkryaDVGGELRRRAMOYAOEvaggvfpadeh-----gagpncdgvvlvwdmagfSgaktarfvkryaDVGGELRRRAMOYAOEvaggvfpadeh<br/> NDELIDDAVIQRTLA YQEGADGICLVGRDFAHLEAIAEHHLPLMLVTygnpqLRddarLarlgvrVVVNGHAA YFAAIKTYDCLREERAVASdl tase lskkyt fpeeyqawardymevk-----</p> <p><b>Proposed:</b> aliSize=208 (resi) RMSD=2.26 (Å)<br/> rt-----K-IRT-hHLORWkaDgHKWAML TAY YSTAR FDEAIPVLLVDSAAANVV-YGYDTTVP SIDELIPLVRGVVGA PHALV VADLPFSYeAGpTAALAAATRFKdGGAHVKLEGG-----G-RVAEQIACLTA-A--G-IPVMAHIGFTPgDAAEOTIADAI VAEAGAFAV<br/> --rashheLrAMFrALDS--S-RCYHTASVFPMSARIAADLIFECGTLGGSVASLQVLAAPDFAL TLSEFVEQATRIGVRLPVIADADHYG-NA-LNVMRTVVELER-ACIAALTIIdtllpaqfgrks tdl icvEGVGKRAALEaRvdPaLTI IARTNAELIDV</p> <p>GAFAVMEMVPAELATQITGKTIITVIGG-----aGP---N---CDGOVLVWDMAGfSgaktarfvkryaDVGGELRRRAMOYAOEvaggvfpadeh-----gagpncdgvvlvwdmagfSgaktarfvkryaDVGGELRRRAMOYAOEvaggvfpadeh<br/> GADGICLVGRDFAHLEAIAEHHLPLMLVTygnpqLRddarLarlgvrVVVNGH-A-----YFAAIKTYDCLREERAVASdl tase lskkyt fpeeyqawardymevk-----</p> |
| 794 | <p>1dktB<br/>(71)</p> <p>1cksB<br/>(78)</p>   | C | 84.51 | <p><b>TM-align:</b> aliSize=59 (resi) RMSD=1.06 (Å)<br/> ---QIYYSKYDDEEFYRHMVLPKDIAKLVPKTHLMSSEWRNLGVQOQSGWVHYMIHEPEPHillfrrplpk-----<br/> ahkQIYYSKYFDEHYEYRHMVLPRELSQVPKTHLMSSEWRNLGVQOQSGWVHYMIHEPEPHillfrrplpkdqk</p> <p><b>SARST:</b> aliSize=69 (resi) RMSD=14.00 (Å)<br/> q----IYYSKYDDEEFYRHMVLPKDIAKLVPKTHLMSSEWRNLGVQOQSGWVHYMIHEPEPHILLFRRPLP-----k<br/> -ahkqIYYSKYFDEHYEYRHMVLPRELSQVPKTHLMSSEWRNLGVQOQSGWVHYMIHEPEPHILLFRRPLPkdqk-</p> <p><b>BLAST:</b> aliSize=65 (resi) iden=84.51% (60/71) simi=91.55% (65/71)<br/> ---QIYYSKYDDEEFYRHMVLPKDIAKLVPKTHLMSSEWRNLGVQOQSGWVHYMIHEPEPHILLFRRPLPK-----<br/> ahkQIYYSKYFDEHYEYRHMVLPRELSQVPKTHLMSSEWRNLGVQOQSGWVHYMIHEPEPHILLFRRPLPKdqk</p> <p><b>Proposed:</b> aliSize=71 (resi) RMSD=1.18 (Å)<br/> ---QIYYSKYDDEEFYRHMVLPKDIAKLVPKTHLMSSEWRNLGVQOQSGWVHYMIHEPEPHILLFRRPLPK-----<br/> ahkQIYYSKYFDEHYEYRHMVLPRELSQVPKTHLMSSEWRNLGVQOQSGWVHYMIHEPEPHILLFRRPLPKdqk</p>                                                                                                                                                                                                                                                                                                                                                                                                                                                                                                                                                                                                                                                                                                                                                                                                                                                                                                                                                                                                                                                                                                                                                                                                                                                                                                                                                                                                                                                                                                                                                                                                                                                                                                                                                                                                                                                                                                                                                                  |

|     |                |   |       |                                                                                                                                                                                                                                                                                                                                                                                                                                                                                                                                                                                                                                                                                                                                                                                                                                                                                                                                                                                                                                                                                                                                      |
|-----|----------------|---|-------|--------------------------------------------------------------------------------------------------------------------------------------------------------------------------------------------------------------------------------------------------------------------------------------------------------------------------------------------------------------------------------------------------------------------------------------------------------------------------------------------------------------------------------------------------------------------------------------------------------------------------------------------------------------------------------------------------------------------------------------------------------------------------------------------------------------------------------------------------------------------------------------------------------------------------------------------------------------------------------------------------------------------------------------------------------------------------------------------------------------------------------------|
| 795 | 1dktB<br>(71)  | C | 53.52 | <p><b>TM-align:</b> aliSize=56 (resi) RMSD=1.93 (Å)</p> <p>-----QIYYSDKYDDEEFYRHMVLPKDIAK-L---VPKT-----HLMSESEWRNLGVQOQSQGWVYMIHepephillfrrplp-----<br/> hafqgrkltqerarvlefqdsIHYSPRYSDDNYEYRHVMLPKAMLVIPSDYfnsevgtlRILTEDEWRGLGITQSLGWEIYECH-----apehillfkrplnyaealraat</p> <p><b>SARST:</b> aliSize=66 (resi) RMSD=10.30 (Å)</p> <p>q-----IYYSDKYDDEEFYRHMVLPKDIAKLVPKT-----HLMSESEWRNLGVQOQSQGWVYMIHePEPHILLFRRP-----lpk<br/> -hafqgrkltqerarvlefqdsIHYSPRYSDDNYEYRHVMLPKAMLVIPSDYfnsevgtlRILTEDEWRGLGITQSLGWEIYECHA-PEPHILLFRRPInyeaelraat---</p> <p><b>BLAST:</b> aliSize=53 (resi) iden=56.34% (40/71) simi=74.65% (53/71)</p> <p>q-----IYYSDKYDDEEFYRHMVLPKDIAKLVPKT-----LMSESEWRNLGVQOQSQGWVYMIHEPEPHILLFRRPL-----pk<br/> -hafqgrkltqerarvlefqdsIHYSPRYSDDNYEYRHVMLPKAMLVIPSDYfnsevgtlrILTEDEWRGLGITQSLGWEIYECHAPEPHILLFRRPLnyaealraat--</p> <p><b>Proposed:</b> aliSize=68 (resi) RMSD=1.31 (Å)</p> <p>-----QIYYSDKYDDEEFYRHMVLPKDIAK-L---VPKT-----HLMSESEWRNLGVQOQSQGWVYM--iHePEPHILLFRRPLP--K-----<br/> hafqgrkltqerarvlefqdsIHYSPRYSDDNYEYRHVMLPKAMLVIPSDYfnsevgtlRILTEDEWRGLGITQSLGWEIYEch-A-PEPHILLFRRPLNyeAelraat</p> |
|     | 1qb3C<br>(109) |   |       |                                                                                                                                                                                                                                                                                                                                                                                                                                                                                                                                                                                                                                                                                                                                                                                                                                                                                                                                                                                                                                                                                                                                      |
| 796 | 1buhB<br>(70)  | C | 84.29 | <p><b>TM-align:</b> aliSize=59 (resi) RMSD=1.08 (Å)</p> <p>---QIYYSDKYDDEEFYRHMVLPKDIAKLVPKTHLMSESEWRNLGVQOQSQGWVHYMIHEPEphillfrrplp-----<br/> ahkQIYYSDKYFDEHYEYRHVMLPRELSKQVPKTHLMSEEEWRRLGVOQSLGWVHYMIHEPE-----phillfrrplpkdqkq</p> <p><b>SARST:</b> aliSize=67 (resi) RMSD=12.88 (Å)</p> <p>qi-----IYYSDKYDDEEFYRHMVLPKDIAKLVPKTHLMSESEWRNLGVQOQSQGWVHYMIHEPEPHILLFRRPL-----p<br/> --ahkqiIYYSDKYFDEHYEYRHVMLPRELSKQVPKTHLMSEEEWRRLGVOQSLGWVHYMIHEPEPHILLFRRPLpkdqkq-</p> <p><b>BLAST:</b> aliSize=64 (resi) iden=84.29% (59/70) simi=91.43% (64/70)</p> <p>---QIYYSDKYDDEEFYRHMVLPKDIAKLVPKTHLMSESEWRNLGVQOQSQGWVHYMIHEPEPHILLFRRPL-----<br/> ahkQIYYSDKYFDEHYEYRHVMLPRELSKQVPKTHLMSEEEWRRLGVOQSLGWVHYMIHEPEPHILLFRRPLpkdqkq</p> <p><b>Proposed:</b> aliSize=70 (resi) RMSD=1.11 (Å)</p> <p>---QIYYSDKYDDEEFYRHMVLPKDIAKLVPKTHLMSESEWRNLGVQOQSQGWVHYMIHEPEPHILLFRRPL-----<br/> ahkQIYYSDKYFDEHYEYRHVMLPRELSKQVPKTHLMSEEEWRRLGVOQSLGWVHYMIHEPEPHILLFRRPLpkdqkq</p>                                                                                                                                                               |
|     | 1cksB<br>(78)  |   |       |                                                                                                                                                                                                                                                                                                                                                                                                                                                                                                                                                                                                                                                                                                                                                                                                                                                                                                                                                                                                                                                                                                                                      |
| 797 | 1buhB<br>(70)  | C | 55.71 | <p><b>TM-align:</b> aliSize=56 (resi) RMSD=1.75 (Å)</p> <p>-----QIYYSDKYDDEEFYRHMVLPKDIAK-L---VPK-----THLMSESEWRNLGVQOQSQGWVYMIHepephillfrrplp-----<br/> hafqgrkltqerarvlefqdsIHYSPRYSDDNYEYRHVMLPKAMLVIPSDYfnsevgtlRILTEDEWRGLGITQSLGWEIYECH-----apehillfkrplnyaealraat</p> <p><b>SARST:</b> aliSize=64 (resi) RMSD=10.62 (Å)</p> <p>qiy-----IYYSDKYDDEEFYRHMVLPKDIAKLVPK-----THLMSESEWRNLGVQOQSQGWVYMIHePEPHILLFRRPL-----p<br/> ---hafqgrkltqerarvlefqdsIHYSPRYSDDNYEYRHVMLPKAMLVIPSDYfnsevgtlRILTEDEWRGLGITQSLGWEIYECHA-PEPHILLFRRPInyeaelraat-</p> <p><b>BLAST:</b> aliSize=53 (resi) iden=57.14% (40/70) simi=75.71% (53/70)</p> <p>q-----IYYSDKYDDEEFYRHMVLPKDIAKLVPKT-----LMSESEWRNLGVQOQSQGWVYMIHEPEPHILLFRRPL-----p<br/> -hafqgrkltqerarvlefqdsIHYSPRYSDDNYEYRHVMLPKAMLVIPSDYfnsevgtlrILTEDEWRGLGITQSLGWEIYECHAPEPHILLFRRPLnyaealraat-</p> <p><b>Proposed:</b> aliSize=69 (resi) RMSD=1.59 (Å)</p> <p>-----QIYYSDKYDDEEFYRHMVLPKDIAK-L---VPK-----THLMSESEWRNLGVQOQSQGWVYM-iHEPEPHILLFRRPLP-----<br/> hafqgrkltqerarvlefqdsIHYSPRYSDDNYEYRHVMLPKAMLVIPSDYfnsevgtlRILTEDEWRGLGITQSLGWEIYEch-APEPHILLFRRPLNyeaelraat</p>       |
|     | 1qb3C<br>(109) |   |       |                                                                                                                                                                                                                                                                                                                                                                                                                                                                                                                                                                                                                                                                                                                                                                                                                                                                                                                                                                                                                                                                                                                                      |

|     |                                                    |   |       |                                                                                                                                                                                                                                                                                                                                                                                                                                                                                                                                                                                                                                                                                                                                                                                                                                                                                                                                                                                                                                                                                                                                              |
|-----|----------------------------------------------------|---|-------|----------------------------------------------------------------------------------------------------------------------------------------------------------------------------------------------------------------------------------------------------------------------------------------------------------------------------------------------------------------------------------------------------------------------------------------------------------------------------------------------------------------------------------------------------------------------------------------------------------------------------------------------------------------------------------------------------------------------------------------------------------------------------------------------------------------------------------------------------------------------------------------------------------------------------------------------------------------------------------------------------------------------------------------------------------------------------------------------------------------------------------------------|
| 798 | <p>1dktA<br/>(72)</p> <hr/> <p>1cksB<br/>(78)</p>  | C | 83.33 | <p>TM-align: aliSize=59 (resi) RMSD=1.03 (Å)<br/>       ---QIYYSDKYDDEEFYRHHVMLPKDIAKLVPKTHLMSESEWRNLGVQOQSGWVHYMIHEPEphillfrrplpkk-----<br/>       ahkQIYYSDKYFDEHYEYRHVMLPRELSKQVPKTHLMSEEEWRRLLGVQOQSLGWVHYMIHEPE-----phillfrrplpkdqk</p> <p>SARST: aliSize=69 (resi) RMSD=14.00 (Å)<br/>       q----IYYSDKYDDEEFYRHHVMLPKDIAKLVPKTHLMSESEWRNLGVQOQSGWVHYMIHEPEPHILLFRRPLF-----kk<br/>       -ahkqIYYSDKYFDEHYEYRHVMLPRELSKQVPKTHLMSEEEWRRLLGVQOQSLGWVHYMIHEPEPHILLFRRPLFkdqk--</p> <p>BLAST: aliSize=65 (resi) iden=83.33% (60/72) simi=90.28% (65/72)<br/>       ---QIYYSDKYDDEEFYRHHVMLPKDIAKLVPKTHLMSESEWRNLGVQOQSGWVHYMIHEPEPHILLFRRPLPK-----k<br/>       ahkQIYYSDKYFDEHYEYRHVMLPRELSKQVPKTHLMSEEEWRRLLGVQOQSLGWVHYMIHEPEPHILLFRRPLPKdqk-</p> <p>Proposed: aliSize=72 (resi) RMSD=1.09 (Å)<br/>       ---QIYYSDKYDDEEFYRHHVMLPKDIAKLVPKTHLMSESEWRNLGVQOQSGWVHYMIHEPEPHILLFRRPLPKK---<br/>       ahkQIYYSDKYFDEHYEYRHVMLPRELSKQVPKTHLMSEEEWRRLLGVQOQSLGWVHYMIHEPEPHILLFRRPLPKDqk</p>                                                                                                                                                 |
| 799 | <p>1dktA<br/>(72)</p> <hr/> <p>1qb3C<br/>(109)</p> | C | 54.17 | <p>TM-align: aliSize=56 (resi) RMSD=1.87 (Å)<br/>       -----QIYYSDKYDDEEFYRHHVMLPKDIAKLV--PKT-----HLMSESEWRNLGVQOQSGWVYMIHepephillfrrplpkk-----<br/>       hafqgrkldqerarvlefqdsIHYSPRYSDDNYEYRHVMLPKAMLVIPsdYFNsevgtlRILTEDEWRGLGITQSLGWEIYECH-----apephillfkrplnyaelraat</p> <p>SARST: aliSize=66 (resi) RMSD=10.24 (Å)<br/>       q-----IYYSDKYDDEEFYRHHVMLPKDIAKLVPKT-----HLMSESEWRNLGVQOQSGWVYMIHEPEPHILLFRRP-----lpkk<br/>       -hafqgrkldqerarvlefqdsIHYSPRYSDDNYEYRHVMLPKAMLVIPsdYfnsevgtlRILTEDEWRGLGITQSLGWEIYECHA-PEPHILLFKRPlnyaelraat----</p> <p>BLAST: aliSize=53 (resi) iden=55.56% (40/72) simi=73.61% (53/72)<br/>       q-----IYYSDKYDDEEFYRHHVMLPKDIAKLVPKT-----LMSESEWRNLGVQOQSGWVYMIHEPEPHILLFRRP-----pkk<br/>       -hafqgrkldqerarvlefqdsIHYSPRYSDDNYEYRHVMLPKAMLVIPSDYfnsevgtlRILTEDEWRGLGITQSLGWEIYECHAPEPHILLFKRPlnyaelraat---</p> <p>Proposed: aliSize=69 (resi) RMSD=1.58 (Å)<br/>       -----QIYYSDKYDDEEFYRHHVMLPKDIAKLV--PKT-----HLMSESEWRNLGVQOQSGWVYMIHEPEPHILLFRRPLP-----kk<br/>       hafqgrkldqerarvlefqdsIHYSPRYSDDNYEYRHVMLPKAMLVIPsdYFNsevgtlRILTEDEWRGLGITQSLGWEIYEc-HAPEPHILLFKRPlnyaelraat--</p> |
| 800 | <p>2astC<br/>(69)</p> <hr/> <p>1cksB<br/>(78)</p>  | C | 84.06 | <p>TM-align: aliSize=59 (resi) RMSD=0.95 (Å)<br/>       ---QIYYSDKYDDEEFYRHHVMLPKDIAKLVPKTHLMSESEWRNLGVQOQSGWVHYMIHEPEphillfrrpl-----<br/>       ahkQIYYSDKYFDEHYEYRHVMLPRELSKQVPKTHLMSEEEWRRLLGVQOQSLGWVHYMIHEPE-----phillfrrplpkdqk</p> <p>SARST: aliSize=67 (resi) RMSD=11.49 (Å)<br/>       q----IYYSDKYDDEEFYRHHVMLPKDIAKLVPKTHLMSESEWRNLGVQOQSGWVHYMIHEPEPHILLFRRF-----l<br/>       -ahkqIYYSDKYFDEHYEYRHVMLPRELSKQVPKTHLMSEEEWRRLLGVQOQSLGWVHYMIHEPEPHILLFRRFpkdqk-</p> <p>BLAST: aliSize=63 (resi) iden=84.06% (58/69) simi=91.30% (63/69)<br/>       ---QIYYSDKYDDEEFYRHHVMLPKDIAKLVPKTHLMSESEWRNLGVQOQSGWVHYMIHEPEPHILLFRRP-----<br/>       ahkQIYYSDKYFDEHYEYRHVMLPRELSKQVPKTHLMSEEEWRRLLGVQOQSLGWVHYMIHEPEPHILLFRRPpkdqk</p> <p>Proposed: aliSize=69 (resi) RMSD=1.01 (Å)<br/>       ---QIYYSDKYDDEEFYRHHVMLPKDIAKLVPKTHLMSESEWRNLGVQOQSGWVHYMIHEPEPHILLFRRP-----<br/>       ahkQIYYSDKYFDEHYEYRHVMLPRELSKQVPKTHLMSEEEWRRLLGVQOQSLGWVHYMIHEPEPHILLFRRPpkdqk</p>                                                                                                                                                                  |

|     |                                                    |   |       |                                                                                                                                                                                                                                                                                                                                                                                                                                                                                                                                                                                                                                                                                                                                                                                                                                                                                                                                                                                                                                                                                                                                                                                                                             |
|-----|----------------------------------------------------|---|-------|-----------------------------------------------------------------------------------------------------------------------------------------------------------------------------------------------------------------------------------------------------------------------------------------------------------------------------------------------------------------------------------------------------------------------------------------------------------------------------------------------------------------------------------------------------------------------------------------------------------------------------------------------------------------------------------------------------------------------------------------------------------------------------------------------------------------------------------------------------------------------------------------------------------------------------------------------------------------------------------------------------------------------------------------------------------------------------------------------------------------------------------------------------------------------------------------------------------------------------|
| 801 | <p>2astC<br/>(69)</p> <hr/> <p>1qb3C<br/>(109)</p> | C | 56.52 | <p><b>TM-align:</b> aliSize=56 (resi) RMSD=1.92 (Å)<br/> -----QIYYSDKYDDEEFYRHMVLPKDIKLV--LV--PKT-----HLMSESEWRNLGVQSQGQWVYMIHepephillfrrpl-----<br/> hafqgrkldtqerarvlefqdsIHYSRPRYSDDNYEYRHVMLPKAMLVIPsdYFNsevgtlRILTEDEWRGLGITQSLGWEIYECH-----apephillfkrplnyaealraat</p> <p><b>SARST:</b> aliSize=66 (resi) RMSD=10.20 (Å)<br/> q-----IYYSDKYDDEEFYRHMVLPKDIKLVPKT-----HLMSESEWRNLGVQSQGQWVYMIHePEPHILLFRRP-----l<br/> -hafqgrkldtqerarvlefqdsIHYSRPRYSDDNYEYRHVMLPKAMLVIPSDYfnsevgtlRILTEDEWRGLGITQSLGWEIYECHA-PEPHILLFRRPInyeaelraat-</p> <p><b>BLAST:</b> aliSize=53 (resi) iden=57.97% (40/69) simi=76.81% (53/69)<br/> q-----IYYSDKYDDEEFYRHMVLPKDIKLVPKT-----LMSESEWRNLGVQSQGQWVYMIHEPEPHILLFRRPL-----<br/> -hafqgrkldtqerarvlefqdsIHYSRPRYSDDNYEYRHVMLPKAMLVIPSDYfnsevgtlRILTEDEWRGLGITQSLGWEIYECHAPEPHILLFRRPLnyaealraat</p> <p><b>Proposed:</b> aliSize=68 (resi) RMSD=1.62 (Å)<br/> -----QIYYSDKYDDEEFYRHMVLPKDIKLV--L--VPKT-----HLMSESEWRNLGVQSQGQWVYMIHePEPHILLFRRPL-----<br/> hafqgrkldtqerarvlefqdsIHYSRPRYSDDNYEYRHVMLPKAMLVIPsdYFNsevgtlRILTEDEWRGLGITQSLGWEIYEc-HAPEPHILLFRRPLInyeaelraat</p>                                                                                                          |
| 802 | <p>2hdxA<br/>(108)</p> <hr/> <p>2h46E<br/>(98)</p> | C | 23.47 | <p><b>TM-align:</b> aliSize=67 (resi) RMSD=2.36 (Å)<br/> qp1s--GYPWFHGMLSRLKAAQLVLEGgtGSHGVFLVROSETRRRECVITFNFOGKAKHLRLSLNAAGQCRVOHLHfqsifdmlehfrvhiplesggssdvvlvsyvs-----<br/> ----mkPHPWFCKIPRAKAEEMLSKQ--RHDGAFLIRESESAPGDFS SVKFGNDVQHFVKVLRDgAGKYFLWVV-----kfnslnelvdyhrstsvsrnqqiflrdie</p> <p><b>SARST:</b> aliSize=82 (resi) RMSD=8.50 (Å)<br/> qp1sg---YPWFHGMLSRLKAAQLVLEGgtGSHGVFLVROSETRRRECVITFNFOGKAKHLRLSLNAAGQCRVOHLHfqsifdmleHfVHP-----iplesggssdvvlvsyvs<br/> ----mkpHPWFCKIPRAKAEEMLSKQ--RHDGAFLIRESESAPGDFS SVKFGNDVQHFVKVLRDgAGKYFLWVVKFNSLNELVDYHSTSVsrnqqiflrdie-----</p> <p><b>BLAST:</b> aliSize=47 (resi) iden=23.47% (23/98) simi=47.96% (47/98)<br/> qp1sg---YPWFHGMLSRLKAAQLVLEGgtGSHGVFLVROSETRRRECVITFNFOGKAKHLRLSLNAAGQCRVOHLHfqsifdmleHfVHP-----vhiplesggssdvvlvsyvs<br/> ----mkpHPWFCKIPRAKAEEMLSKQ--RHDGAFLIRESESAPGDFS SVKFGNDVQHFVKVLRDgAGKYFLWVVKFNSLNELVDYHSTSVsrnqqiflrdie-----</p> <p><b>Proposed:</b> aliSize=93 (resi) RMSD=2.00 (Å)<br/> qp1s--GYPWFHGMLSRLKAAQLVLEGgtGSHGVFLVROSETRRRECVITFNFOGKAKHLRLSLN-aAGQCRV--qhLHfqsifdmleHfVHPiPlesGSDVVLVSyVps<br/> ----mkPHPWFCKIPRAKAEEMLSKQ--RHDGAFLIRESESAPGDFS SVKFGNDVQHFVKVLRDgAGKYFLWV--VKFNSLNELVDYHSTSVSR--N-QQIFLrdie--</p> |
| 803 | <p>2hdxA<br/>(108)</p> <hr/> <p>2h5kB<br/>(96)</p> | C | 21.88 | <p><b>TM-align:</b> aliSize=66 (resi) RMSD=2.22 (Å)<br/> qp1sGYPWFHGMLSRLKAAQLVLEGgtGSHGVFLVROSETRRRECVITFNFOGKAKHLRLSLNa-AGQCRVOHLHfqsifdmlehfrvhiplesggssdvvlvsyvs-----<br/> ----PHPWFCKIPRAKAEEMLSKQ--RHDGAFLIRESESAPGDFS SVKFGNDVQHFVKVLRD-gAGKYFLWVV-----kfnslnelvdyhrstsvsrnqqiflrdie</p> <p><b>SARST:</b> aliSize=92 (resi) RMSD=11.94 (Å)<br/> qp1sg-YPWFHGMLSRLKAAQLVLEGgtGSHGVFLVROSETRRRECVITFNFOGKAKHLRLSLNAAGQCRVOHLHfqsifdmleHfVHPiPlesGSSDVL-vsyvs<br/> ----pHPWFCKIPRAKAEEMLSKQRH--DGAFLIRESESAPGDFS SVKFGNDVQHFVKVLRDgAGKYFLWVVKFNSLNELVDYHSTSVS--RNQIFLrdi-----</p> <p><b>BLAST:</b> aliSize=47 (resi) iden=24.21% (23/96) simi=49.47% (47/96)<br/> qp1sg-YPWFHGMLSRLKAAQLVLEGgtGSHGVFLVROSETRRRECVITFNFOGKAKHLRLSLNa-AGQCRVOHLHfqsifdmleHfVHPiPlesGSSDVL-vsyvs<br/> ----pHPWFCKIPRAKAEEMLSKQ--RHDGAFLIRESESAPGDFS SVKFGNDVQHFVKVLRDgAGKYFLWVVKFNSLNELVDYHSTSVsrnqqiflrdi-----</p> <p><b>Proposed:</b> aliSize=93 (resi) RMSD=1.82 (Å)<br/> qp1sGYPWFHGMLSRLKAAQLVLEGgtGSHGVFLVROSETRRRECVITFNFOGKAKHLRLSL---NaagQCRVOHLHfqsifdmleHfVHPiPlesGSDVVLVSyVps<br/> ----PHPWFCKIPRAKAEEMLSKQ--RHDGAFLIRESESAPGDFS SVKFGNDVQHFVKVLRdgaG---KYFLWVVKFNSLNELVDYHSTSVSR--N-QQIFLrdie--</p>                           |

|     |                |   |       |                                                                                                                                                                                                                                                                                                                                                                                                                                                                                                                                                                                                                                                                                                                                                                                                                                                                                                                                                                                                                                                                                                                                                                                                                                                     |
|-----|----------------|---|-------|-----------------------------------------------------------------------------------------------------------------------------------------------------------------------------------------------------------------------------------------------------------------------------------------------------------------------------------------------------------------------------------------------------------------------------------------------------------------------------------------------------------------------------------------------------------------------------------------------------------------------------------------------------------------------------------------------------------------------------------------------------------------------------------------------------------------------------------------------------------------------------------------------------------------------------------------------------------------------------------------------------------------------------------------------------------------------------------------------------------------------------------------------------------------------------------------------------------------------------------------------------|
| 804 | 2hdxA<br>(108) | C | 22.58 | <p><b>TM-align:</b> aliSize=66 (resi) RMSD=2.52 (Å)<br/> qplsgyPWFHMLSLKAAQLVLEggtGSHVFLVROSETRRRECVLTFNFQGKAKHLRLSLNAAGCCRVOHLHfqsifdmlehfr-----Hpiplesggssdvvlvsyvps-----<br/> -----PWFHMLSLKAAQLVLEggtGSHVFLVROSETRRRECVLTFNFQGKAKHLRLSLNAAGCCRVOHLHfqsifdmlehfr-----kfnslnelvdyhrsT-----svsrnqqiflrdi</p> <p><b>SARST:</b> aliSize=79 (resi) RMSD=7.46 (Å)<br/> qplsgypWFHMLSLKAAQLVLEggtGSHVFLVROSETRRRECVLTFNFQGKAKHLRLSLNAAGCCRVOHLHfqsifdmlehfrVHP-----iplesggssdvvlvsyvps<br/> -----pWFHMLSLKAAQLVLEggtGSHVFLVROSETRRRECVLTFNFQGKAKHLRLSLNAAGCCRVOHLHfqsifdmlehfrVHP-----iplesggssdvvlvsyvps</p> <p><b>BLAST:</b> aliSize=46 (resi) iden=24.73% (23/93) simi=49.46% (46/93)<br/> qplsgyPWFHMLSLKAAQLVLEggtGSHVFLVROSETRRRECVLTFNFQGKAKHLRLSLNAAGCCRVOHLHfqsifdmlehfr-----vhiplesggssdvvlvsyvps<br/> -----PWFHMLSLKAAQLVLEggtGSHVFLVROSETRRRECVLTFNFQGKAKHLRLSLNAAGCCRVOHLHfqsifdmlehfr-----kfnslnelvdyhrsT-----svsrnqqiflrdi</p> <p><b>Proposed:</b> aliSize=90 (resi) RMSD=1.83 (Å)<br/> qplsgyPWFHMLSLKAAQLVLEggtGSHVFLVROSETRRRECVLTFNFQGKAKHLRLSL---NaagCCRVOHLHfqsifdmlehfrVHPVPLEsgGsSDVVLVSyvps<br/> -----PWFHMLSLKAAQLVLEggtGSHVFLVROSETRRRECVLTFNFQGKAKHLRLSL---NaagCCRVOHLHfqsifdmlehfrVHPVPLEsgGsSDVVLVSyvps</p>                |
| 805 | 2hdxA<br>(108) | C | 21.88 | <p><b>TM-align:</b> aliSize=70 (resi) RMSD=2.67 (Å)<br/> QplsgyPWFHMLSLKAAQLVLEggtGSHVFLVROSETRRRECVLTFNFQGKAKHLRLSLNAAGCCRVOHLHfqsifdmlehfr-----Vhiplesggssdvvlvsyvps-----<br/> K---PHPWFHMLSLKAAQLVLEggtGSHVFLVROSETRRRECVLTFNFQGKAKHLRLSLNAAGCCRVOHLHfqsifdmlehfr-----kfnslnelvdyhrsT-----svsrnqqiflrdi</p> <p><b>SARST:</b> aliSize=81 (resi) RMSD=7.35 (Å)<br/> qplsg--YPWFHMLSLKAAQLVLEggtGSHVFLVROSETRRRECVLTFNFQGKAKHLRLSLNAAGCCRVOHLHfqsifdmlehfrVHP-----iplesggssdvvlvsyvps<br/> -----kPHPWFHMLSLKAAQLVLEggtGSHVFLVROSETRRRECVLTFNFQGKAKHLRLSLNAAGCCRVOHLHfqsifdmlehfrVHP-----iplesggssdvvlvsyvps</p> <p><b>BLAST:</b> aliSize=47 (resi) iden=23.96% (23/96) simi=48.96% (47/96)<br/> qplsg--YPWFHMLSLKAAQLVLEggtGSHVFLVROSETRRRECVLTFNFQGKAKHLRLSLNAAGCCRVOHLHfqsifdmlehfr-----vhiplesggssdvvlvsyvps<br/> -----kPHPWFHMLSLKAAQLVLEggtGSHVFLVROSETRRRECVLTFNFQGKAKHLRLSLNAAGCCRVOHLHfqsifdmlehfr-----kfnslnelvdyhrsT-----svsrnqqiflrdi</p> <p><b>Proposed:</b> aliSize=92 (resi) RMSD=1.68 (Å)<br/> qpls-GYPWFHMLSLKAAQLVLEggtGSHVFLVROSETRRRECVLTFNFQGKAKHLRLSL---NaagCCRVOHLHfqsifdmlehfrVHPVPLEsgGsSDVVLVSyvps<br/> -----kPHPWFHMLSLKAAQLVLEggtGSHVFLVROSETRRRECVLTFNFQGKAKHLRLSL---NaagCCRVOHLHfqsifdmlehfrVHPVPLEsgGsSDVVLVSyvps</p> |
| 806 | 2hdxA<br>(108) | C | 22.58 | <p><b>TM-align:</b> aliSize=68 (resi) RMSD=2.52 (Å)<br/> qplsgY PWFHMLSLKAAQLVLEggtGSHVFLVROSETRRRECVLTFNFQGKAKHLRLSLNAAGCCRVOHLHfqsifdmlehfr-----Vhiplesggssdvvlvsyvps-----<br/> -----HPWFHMLSLKAAQLVLEggtGSHVFLVROSETRRRECVLTFNFQGKAKHLRLSLNAAGCCRVOHLHfqsifdmlehfr-----kfnslnelvdyhrsT-----svsrnqqiflrdi</p> <p><b>SARST:</b> aliSize=81 (resi) RMSD=7.28 (Å)<br/> qplsgy-PWFHMLSLKAAQLVLEggtGSHVFLVROSETRRRECVLTFNFQGKAKHLRLSLNAAGCCRVOHLHfqsifdmlehfrVHP-----iplesggssdvvlvsyvps<br/> -----hPWFHMLSLKAAQLVLEggtGSHVFLVROSETRRRECVLTFNFQGKAKHLRLSLNAAGCCRVOHLHfqsifdmlehfrVHP-----iplesggssdvvlvsyvps</p> <p><b>BLAST:</b> aliSize=47 (resi) iden=24.73% (23/93) simi=50.54% (47/93)<br/> qplsgY PWFHMLSLKAAQLVLEggtGSHVFLVROSETRRRECVLTFNFQGKAKHLRLSLNAAGCCRVOHLHfqsifdmlehfr-----vhiplesggssdvvlvsyvps<br/> -----HPWFHMLSLKAAQLVLEggtGSHVFLVROSETRRRECVLTFNFQGKAKHLRLSLNAAGCCRVOHLHfqsifdmlehfr-----kfnslnelvdyhrsT-----svsrnqqiflrdi</p> <p><b>Proposed:</b> aliSize=90 (resi) RMSD=1.62 (Å)<br/> qplsgY PWFHMLSLKAAQLVLEggtGSHVFLVROSETRRRECVLTFNFQGKAKHLRLSL---NaagCCRVOHLHfqsifdmlehfrVHPVPLEsgGsSDVVLVSyvps<br/> -----HPWFHMLSLKAAQLVLEggtGSHVFLVROSETRRRECVLTFNFQGKAKHLRLSL---NaagCCRVOHLHfqsifdmlehfrVHPVPLEsgGsSDVVLVSyvps</p>        |

|     |                                            |   |       |                                                                                                                                                                                                                                                                                                                                                                                                                                                                                                                                                                                                                                                                                                                                                                                                                                                                                                                                                                                                                                                                                                                                                                                         |
|-----|--------------------------------------------|---|-------|-----------------------------------------------------------------------------------------------------------------------------------------------------------------------------------------------------------------------------------------------------------------------------------------------------------------------------------------------------------------------------------------------------------------------------------------------------------------------------------------------------------------------------------------------------------------------------------------------------------------------------------------------------------------------------------------------------------------------------------------------------------------------------------------------------------------------------------------------------------------------------------------------------------------------------------------------------------------------------------------------------------------------------------------------------------------------------------------------------------------------------------------------------------------------------------------|
| 807 | <p>1p13A (102)</p> <hr/> <p>2h46E (98)</p> | C | 29.59 | <p><b>TM-align:</b> aliSize=66 (resi) RMSD=1.32 (Å)<br/> --AEEYFGKTRRESERLLNpENPRITFLVRESE-TTKgAYCLSVSDFdnakgLNvKHYKIRKLDSCGFYITSRtQfsslqqlvayyskhadglchrltnvcp-----<br/> mkPHPWFVGKTPRAKAEEMLSK-QRHDGAFLIRESESAPG-DFSLSVKFG-----NDVQHFVLRDGAQYFLWVWV-----kfnslnelvdyhrstsvsrnqqiflrdie</p> <p><b>SARST:</b> aliSize=81 (resi) RMSD=8.80 (Å)<br/> a---EEYFGKTRRESERLLNpENPRITFLVRESETTKAYCLSVSDFdnakgLNvKHYKIRKLDSCGFYITSRtQFSSLQQLVAIYSKH-----adglchrltnvcp<br/> -mkpHPWFVGKTPRAKAEEMLSKQRH-DGAFLIRESESAPGDFSLSVKFG-----NDVQHFVLRDGAQYFLW-VVKFNSLNELVDYHRSTsvsrnqqiflrdie-----</p> <p><b>BLAST:</b> aliSize=51 (resi) iden=33.67% (33/98) simi=52.04% (51/98)<br/> aee-----YFGKTRRESERILLNpENPRITFLVRESETTKAYCLSVSDFdnakgLNvKHYKIRKLDSCGFYITSRtQFSSLQQLVAIY-----skhadglchrltnvcp<br/> ---mkphpWFVGKTPRAKAEEMLSKQRHDGAFLIRESESAPGDFSLSVKFG-----DVQHFVLR-DGAKYFLWVVKFNSLNELVDYHrstsvsrnqqiflrdie-----</p> <p><b>Proposed:</b> aliSize=95 (resi) RMSD=1.74 (Å)<br/> --AEEYFGKTRRESERLLNpENPRITFLVRESETTKAYCLSVSDFdnakgLNvKHYKIRKLDSCGFYITSRtQFSSLQQLVAIYSKHADGL-CHRLTNVCP<br/> mkPHPWFVGKTPRAKAEEMLSK-QRHDGAFLIRESESAPGDFSLSVKFG-----NDVQHFVLRDGAQYFLWV-VKNSLNELVDYHRSTSVSRnQqIFLRDIE</p> |
| 808 | <p>1p13A (102)</p> <hr/> <p>2h5kB (96)</p> | C | 29.17 | <p><b>TM-align:</b> aliSize=66 (resi) RMSD=1.40 (Å)<br/> AEEYFGKTRRESERLLNpENPRITFLVRESE-TTKgAYCLSVSDFdnakgLNvKHYKIRKLDSCGFYITSRtQfsslqqlvayyskhadglchrltnvcp-----<br/> PHPWFVGKTPRAKAEEMLSK-QRHDGAFLIRESESAPG-DFSLSVKFG-----NDVQHFVLRDGAQYFLWVWV-----kfnslnelvdyhrstsvsrnqqiflrdie</p> <p><b>SARST:</b> aliSize=81 (resi) RMSD=8.95 (Å)<br/> a-EEYFGKTRRESERLLNpENPRITFLVRESETTKAYCLSVSDFdnakgLNvKHYKIRKLDSCGFYITSRtQFSSLQQLVAIYSKH-----adglchrltnvcp<br/> -pHPWFVGKTPRAKAEEMLSKQRHDGAFLIRESESAPGDFSLSVKFG-----NDVQHFVLRDGAQYFLW-VVKFNSLNELVDYHRSTsvsrnqqiflrdie-----</p> <p><b>BLAST:</b> aliSize=51 (resi) iden=34.74% (33/96) simi=53.68% (51/96)<br/> aee---YFGKTRRESERILLNpENPRITFLVRESETTKAYCLSVSDFdnakgLNvKHYKIRKLDSCGFYITSRtQFSSLQQLVAIY-----skhadglchrltnvcp<br/> ---phpWFVGKTPRAKAEEMLSKQRHDGAFLIRESESAPGDFSLSVKFG-----DVQHFVLR-DGAKYFLWVVKFNSLNELVDYHrstsvsrnqqiflrdie-----</p> <p><b>Proposed:</b> aliSize=94 (resi) RMSD=1.65 (Å)<br/> AEEYFGKTRRESERLLNpENPRITFLVRESE-TTKgAYCLSVSDFdnakgLNvKHYKIRKLDSCGFYITSRtQFSSLQQLVAIYSKHADGL-CHRLTNVCP<br/> PHPWFVGKTPRAKAEEMLSK-QRHDGAFLIRESESAPGDFSLSVKFG-----NDVQHFVLRDGAQYFLWVWV-KNSLNELVDYHRSTSVSRnQqIFLRDIE</p>               |
| 809 | <p>1p13A (102)</p> <hr/> <p>2aobB (93)</p> | C | 32.26 | <p><b>TM-align:</b> aliSize=68 (resi) RMSD=1.91 (Å)<br/> aeEYFGKTRRESERLLNpENPRITFLVRESETTKAYCLSVSDFdnakgLNvKHYKIRKLDSCGFYITSRtQfsslqqlvayyskh-----ADglchrltnvcp-----<br/> --PWFVGKTPRAKAEEMLSK-QRHDGAFLIRESESAPGDFSLSVKFG-----NDVQHFVLRDGAQYFLWVVK-----fnslnelvdyhrST-----svsrnqqiflrdie</p> <p><b>SARST:</b> aliSize=78 (resi) RMSD=7.74 (Å)<br/> aee-YFGKTRRESERLLNpENPRITFLVRESETTKAYCLSVSDFdnakgLNvKHYKIRKLDSCGFYITSRtQFSSLQQLVAIYSKH-----adglchrltnvcp<br/> ---pWFVGKTPRAKAEEMLSKQRH-HDGAFLIRESESAPGDFSLSVKFG-----NDVQHFVLRDGAQYFLW-VVKFNSLNELVDYHRSTsvsrnqqiflrdie-----</p> <p><b>BLAST:</b> aliSize=51 (resi) iden=35.48% (33/93) simi=54.84% (51/93)<br/> aee-YFGKTRRESERILLNpENPRITFLVRESETTKAYCLSVSDFdnakgLNvKHYKIRKLDSCGFYITSRtQFSSLQQLVAIY-----skhadglchrltnvcp<br/> ---pWFVGKTPRAKAEEMLSKQRHDGAFLIRESESAPGDFSLSVKFG-----DVQHFVLR-DGAKYFLWVVKFNSLNELVDYHrstsvsrnqqiflrdie-----</p> <p><b>Proposed:</b> aliSize=91 (resi) RMSD=1.28 (Å)<br/> aeEYFGKTRRESERLLNpENPRITFLVRESETTKAYCLSVSDFdnakgLNvKHYKIRKLDSCGFYITSRtQFSSLQQLVAIYSKHADGL-C-HRITnVCP<br/> --PWFVGKTPRAKAEEMLSK-QRHDGAFLIRESESAPGDFSLSVKFG-----NDVQHFVLRDGAQYFLWVWV-KNSLNELVDYHRSTSVSRnQqIFLR-DI-</p>           |

|     |                               |   |       |                                                                                                                                                                                                                                                                                                                                                                                                                                                                                                                                                                                                                                                                                                                                                                                                                                                                                                                                                                                                                                                                                                                                                                                                                                                                                                                                                                              |
|-----|-------------------------------|---|-------|------------------------------------------------------------------------------------------------------------------------------------------------------------------------------------------------------------------------------------------------------------------------------------------------------------------------------------------------------------------------------------------------------------------------------------------------------------------------------------------------------------------------------------------------------------------------------------------------------------------------------------------------------------------------------------------------------------------------------------------------------------------------------------------------------------------------------------------------------------------------------------------------------------------------------------------------------------------------------------------------------------------------------------------------------------------------------------------------------------------------------------------------------------------------------------------------------------------------------------------------------------------------------------------------------------------------------------------------------------------------------|
| 810 | 1p13A (102)<br><br>2aobA (96) | C | 30.21 | <p><b>TM-align: aliSize=69 (resi) RMSD=2.08 (Å)</b><br/>-AEEYFGK I TRRESERL L NpENPR T FLVRESE - TTKgAYCL SVSDfDnakgLN VKHYK I RKLDS G FYIT <b>SRTQ</b> fsslqqlvayyskh-----ADg lchrl tnvcp-----<br/>kPHPWF F GK I PRAKA EEM SK -QRHD GAFL I RESE s APG-DFS L SVKFG-----NDVQHFKV L RDGA KYFL WVK-----fns lnelvdyhr <b>ST</b>-----svs rnqqi fl rdi</p> <p><b>SARST: aliSize=80 (resi) RMSD=7.74 (Å)</b><br/>a--EEYFGK I TRRESERL L NpEN-PRGT FLVRESE TTKAYCL SVSDfDnakgLN VKHYK I RKLDS G FYIT <b>SRTQ</b> FSSLQQLV A YSKH-----adglchrl tnvcp<br/>-kpHPWF F GK I PRAKA EEM --SKQ rHD GAFL I RESE SAP DFS L SVK F-----NDVQHFKV L RDGA KYFL W-VVK FNSL NELVDYHRSTsvs rnqqi fl rdi-----</p> <p><b>BLAST: aliSize=51 (resi) iden=34.38% (33/96) simi=53.12% (51/96)</b><br/>aee----WYFGK I TRRESERL L NpENPR T FLVRESE TTKAYCL SVSDfDnakgLN VKHYK I RKLDS G G FYIT <b>SRTQ</b> FSSLQQLV A Y-----skhadglchrl tnvcp<br/>---kphPWF F GK I PRAKA EEM -MLSKQRHD GAFL I RESE SAP DFS L SVK -FGN-----DVQHFKV L R-DGACKYFL WVK FNSL NELVDYHrstsvs rnqqi fl rdi-----</p> <p><b>Proposed: aliSize=94 (resi) RMSD=1.79 (Å)</b><br/>-AEEYFGK I TRRESERL L NpENPR T FLVRESE TTKAYCL SVSDfDnakgLN VKHYK I RKLDS G FYIT <b>SRTQ</b> FSSLQQLV A YSKHADGL-CHRLTnVcp<br/>kPHPWF F GK I PRAKA EEM SK -QRHD GAFL I RESE SAP DFS L SVKFG-----NDVQHFKV L RDGA KYFL WVK-FNSL NELVDYHRSTSVSRnQQIFLRDI-</p> |
| 811 | 1p13A (102)<br><br>2aoaA (93) | C | 31.18 | <p><b>TM-align: aliSize=68 (resi) RMSD=2.04 (Å)</b><br/>aEEYFGK I TRRESERL L NpENPR T FLVRESE - TTKgAYCL SVSDfDnakgLN VKHYK I RKLDS G FYIT <b>SRTQ</b> fsslqqlvayyskh-----ADg lchrl tnvcp-----<br/>-HPWF F GK I PRAKA EEM SK -QRHD GAFL I RESE s APG-DFS L SVKFG-----NDVQHFKV L RDGA KYFL WVK-----fns lnelvdyhr <b>ST</b>-----svs rnqqi fl rdi</p> <p><b>SARST: aliSize=79 (resi) RMSD=7.76 (Å)</b><br/>ae-EYFGK I TRRESERL L NpEN-PRGT FLVRESE TTKAYCL SVSDfDnakgLN VKHYK I RKLDS G FYIT <b>SRTQ</b> FSSLQQLV A YSKH-----adglchrl tnvcp<br/>--hPWF F GK I PRAKA EEM --SKQ rHD GAFL I RESE SAP DFS L SVK F-----NDVQHFKV L RDGA KYFL W-VVK FNSL NELVDYHRSTsvs rnqqi fl rdi-----</p> <p><b>BLAST: aliSize=51 (resi) iden=35.48% (33/93) simi=54.84% (51/93)</b><br/>aee--WYFGK I TRRESERL L NpENPR T FLVRESE TTKAYCL SVSDfDnakgLN VKHYK I RKLDS G G FYIT <b>SRTQ</b> FSSLQQLV A Y-----skhadglchrl tnvcp<br/>---hpPWF F GK I PRAKA EEM -MLSKQRHD GAFL I RESE SAP DFS L SVK -FGN-----DVQHFKV L R-DGACKYFL WVK FNSL NELVDYHrstsvs rnqqi fl rdi-----</p> <p><b>Proposed: aliSize=92 (resi) RMSD=1.68 (Å)</b><br/>aEEYFGK I TRRESERL L NpENPR T FLVRESE TTKAYCL SVSDfDnakgLN VKHYK I RKLDS G FYIT <b>SRTQ</b> FSSLQQLV A YSKHADGL-CHRLTnVcp<br/>-HPWF F GK I PRAKA EEM SK -QRHD GAFL I RESE SAP DFS L SVKFG-----NDVQHFKV L RDGA KYFL WVK-FNSL NELVDYHRSTSVSRnQQIFL-RD-</p>          |
| 812 | 1rjaA (100)<br><br>2h46E (98) | C | 38.78 | <p><b>TM-align: aliSize=66 (resi) RMSD=2.18 (Å)</b><br/>s---EPWFFGC I SRSEAVRR I QAeGNAT GAFL I RVSEKPSADYVLSVRDTQA V RHYK I WRRAG RRLH <b>NeAVS</b> flslpelvnyhraqlshglrlaapcrkhe-----<br/>-mkpHPWF F GK I PRAKA EEM SK -QRHD GAFL I RESE SAPDFS L SVKFGNDVQHFKV L RDGA KYFL W-VV-----kfnslnelvdyhrstsvs rnqqi fl rdi</p> <p><b>SARST: aliSize=91 (resi) RMSD=12.53 (Å)</b><br/>s---EPWFFGC I SRSEAVRR I QAeGNAT GAFL I RVSEKPSADYVLSV-RDTQA V RHYK I WRRAG RRLH <b>NeAVS</b> FLSP ELP V NYHRAQSLSHGLRLAAPCR--khe<br/>-mkpHPWF F GK I PRAKA EEM SKQRH-DGAFL I RESE SAPDFS L SVKFGNDVQHFKV L RDGA KYFL W-VVK FNSL NELVDYHRST-SVSRNQQIFLRDIe---</p> <p><b>BLAST: aliSize=54 (resi) iden=39.80% (39/98) simi=55.10% (54/98)</b><br/>se----PWF F GC I SRSEAVRR I QAeGNAT GAFL I RVSEKPSADYVLSVRDTQA V RHYK I WRRAG RRLH <b>NeAVS</b> FLSP ELP V NYHRAQSLSHGLRL-----aapcrkhe<br/>--mkpHPWF F GK I PRAKA EEM SKQRH-DGAFL I RESE SAPDFS L SVKFGNDVQHFKV L RDGA KYFL W-VVK FNSL NELVDYHRSTSVSRNQQI fl rdi-----</p> <p><b>Proposed: aliSize=91 (resi) RMSD=1.90 (Å)</b><br/>s----EpWFFGC I SRSEAVRR I QAeGNAT GAFL I RVSEKPSADYVLSVRDTQA V RHYK I WRRAG RRLH <b>NeAVS</b> FLSP ELP V NYHRAQSLSH--G-LR I A A P c R k h e<br/>-mkpHPWF F GK I PRAKA EEM SK -QRHD GAFL I RESE SAPDFS L SVKFGNDVQHFKV L RDGA KYFL W-VVK FNSL NELVDYHRST-SVSRnQqIFLRDI-E---</p>                           |

|     |                                                                                                                |   |       |                                                                                                                                                                                                                                                                                                                                                                                                                                                                                                                                                                                                                                                                                                                                                                                                                                                                                                                                                                                                                                                                                                                                                                                                                                                                                                                                                        |
|-----|----------------------------------------------------------------------------------------------------------------|---|-------|--------------------------------------------------------------------------------------------------------------------------------------------------------------------------------------------------------------------------------------------------------------------------------------------------------------------------------------------------------------------------------------------------------------------------------------------------------------------------------------------------------------------------------------------------------------------------------------------------------------------------------------------------------------------------------------------------------------------------------------------------------------------------------------------------------------------------------------------------------------------------------------------------------------------------------------------------------------------------------------------------------------------------------------------------------------------------------------------------------------------------------------------------------------------------------------------------------------------------------------------------------------------------------------------------------------------------------------------------------|
| 813 | <p data-bbox="172 226 243 298">IrjaA<br/>(100)</p> <hr/> <p data-bbox="172 550 243 621">2h5kB<br/>(96)</p>     | C | 39.58 | <p data-bbox="468 180 1127 210"><b>TM-align:</b> aliSize=66 (resi) RMSD=2.26 (Å)</p> <p data-bbox="468 210 2113 264">s-EPWFFGCI SRSEAVRRIQAEGNATGAFILRVSEKPSADYVLSVRDTQAVRHYKIWRAGRLHLNEAVSflslpelvnyhraqs lshglrlaapcrkhe-----<br/>-pHPWFFGKI PRAKAEEMLSK-QRHDGAFILRESE SAPGDFSLSVKFGNDVQHFVKVLRDGACKYFLW-VV-----kfnslnelvdyhrstsvsrnqqiflrdi</p> <p data-bbox="468 315 1127 344"><b>SARST:</b> aliSize=92 (resi) RMSD=12.86 (Å)</p> <p data-bbox="468 344 1774 399">s-EPWFFGCI SRSEAVRRIQAEGNATGAFILRVSEKPSADYVLSVRDTQAVRHYKIWRAGRLHLNEAVSLSLPELVNyhraqSLSHGLRLAAPCRKH--e<br/>-pHPWFFGKI PRAKAEEMLSKQRH-DGAFILRESE SAPGDFSLSVKFGNDVQHFVKVLRDGACKYFLW-VVKNSLNELVDY---HRSTSVSRNQQIFLRdi-</p> <p data-bbox="468 449 1822 533"><b>BLAST:</b> aliSize=54 (resi) iden=41.05% (39/96) simi=56.84% (54/96)<br/>se--PWFFGCI SRSEAVRRIQAEGNATGAFILRVSEKPSADYVLSVRDTQAVRHYKIWRAGRLHLNEAVSLSLPELVNyhraqSLSHGLRL-----aapcrkhe<br/>--phPWFFGKI PRAKAEEMLSKQRH-DGAFILRESE SAPGDFSLSVKFGNDVQHFVKVLRDGACKYFLW-VVKNSLNELVDYHRSTSVSRNQQIFLRdi-----</p> <p data-bbox="468 583 1798 667"><b>Proposed:</b> aliSize=91 (resi) RMSD=1.90 (Å)<br/>s--EpWFFGCI SRSEAVRRIQAEGNATGAFILRVSEKPSADYVLSVRDTQAVRHYKIWRAGRLHLNEAVSLSLPELVNyhraqSLSH--G-LR AAPCrkhe<br/>-phP-WFFGKI PRAKAEEMLSK-QRHDGAFILRESE SAPGDFSLSVKFGNDVQHFVKVLRDGACKYFLW-VVKNSLNELVDYHRST--VSrnQqIFLRDI-E---</p> |
| 814 | <p data-bbox="172 869 243 940">IrjaA<br/>(100)</p> <hr/> <p data-bbox="172 1192 243 1264">2aobB<br/>(93)</p>   | C | 39.78 | <p data-bbox="468 831 2047 915"><b>TM-align:</b> aliSize=68 (resi) RMSD=2.83 (Å)<br/>sEpWFFGCI SRSEAVRRIQAEGNATGAFILRVSEKPSADYVLSVRDTQAVRHYKIWRAGRLHLNEAVSflslpelvnyhr-----AQslshglrlaapcrkhe-----<br/>-P-WFFGKI PRAKAEEMLSK-QRHDGAFILRESE SAPGDFSLSVKFGNDVQHFVKVLRDGACKYFLW-VVK-----fnslnelvdyhrST-----svsrnqqiflrdi</p> <p data-bbox="468 966 1952 1050"><b>SARST:</b> aliSize=76 (resi) RMSD=7.60 (Å)<br/>sep-WFFGCI SRSEAVRRIQAEGNATGAFILRVSEKPSADYVLSVR-DTQAVRHYKIWRAGRLHLNEAVSLSLPELVNyhraqSLSHGLRLAAPCRKhe<br/>---pWFFGKI PRAKAEEMLSKQRH-DGAFILRESE SAPGDFSLSVKFGNDVQHFVKVLRDGACK-YFLW-VVKNSLNELVDYHRSTsvsrnqqiflrdi-----</p> <p data-bbox="468 1100 1798 1184"><b>BLAST:</b> aliSize=54 (resi) iden=41.94% (39/93) simi=58.06% (54/93)<br/>sePWFFGCI SRSEAVRRIQAEGNATGAFILRVSEKPSADYVLSVRDTQAVRHYKIWRAGRLHLNEAVSLSLPELVNyhraqSLSHGLRL-----aapcrkhe<br/>--PWFFGKI PRAKAEEMLSKQRH-DGAFILRESE SAPGDFSLSVKFGNDVQHFVKVLRDGACKYFLW-VVKNSLNELVDYHRSTSVSRNQQIFLRdi-----</p> <p data-bbox="468 1234 1798 1318"><b>Proposed:</b> aliSize=88 (resi) RMSD=1.84 (Å)<br/>sEpWFFGCI SRSEAVRRIQAEGNATGAFILRVSE-kpS-ADYVLSVRDTQAVRHYKIWRAGRLHLNEAVSLSLPELVNyhraqSLSH--G-LR AAPCrkhe<br/>-P-WFFGKI PRAKAEEMLSK-QRHDGAFILRESEs--ApGDFSLSVKFGNDVQHFVKVLRDGACKYFLWV-VKNSLNELVDYHRST--VSrnQqIFLRDI-----</p>                                                          |
| 815 | <p data-bbox="172 1520 243 1591">IrjaA<br/>(100)</p> <hr/> <p data-bbox="172 1835 243 1906">2aobA<br/>(96)</p> | C | 38.54 | <p data-bbox="468 1482 2077 1566"><b>TM-align:</b> aliSize=69 (resi) RMSD=2.60 (Å)<br/>s--EPWFFGCI SRSEAVRRIQAEGNATGAFILRVSEKPSADYVLSVRDTQAVRHYKIWRAGRLHLNEAVSflslpelvnyhr-----AQslshglrlaapcrkhe-----<br/>-kphPWFFGKI PRAKAEEMLSK-QRHDGAFILRESE SAPGDFSLSVKFGNDVQHFVKVLRDGACKYFLW-VVK-----fnslnelvdyhrST-----svsrnqqiflrdi</p> <p data-bbox="468 1617 1786 1701"><b>SARST:</b> aliSize=92 (resi) RMSD=10.76 (Å)<br/>s--EPWFFGCI SRSEAVRRIQAEGNATGAFILRVSEKPSADYVLSVR-DTQAVRHYKIWRAGRLHLNEAVSLSLPELVNyhraqSLSHGLRLAAPCR-khe<br/>-kphPWFFGKI PRAKAEEMLSKQRH-DGAFILRESE SAPGDFSLSVKFGNDVQHFVKVLRDGACK-YFLW-VVKNSLNELVDYHRST-SVSRNQQIFLRDI---</p> <p data-bbox="468 1751 1834 1835"><b>BLAST:</b> aliSize=54 (resi) iden=40.62% (39/96) simi=56.25% (54/96)<br/>se---PWFFGCI SRSEAVRRIQAEGNATGAFILRVSEKPSADYVLSVRDTQAVRHYKIWRAGRLHLNEAVSLSLPELVNyhraqSLSHGLRL-----aapcrkhe<br/>--kphPWFFGKI PRAKAEEMLSKQRH-DGAFILRESE SAPGDFSLSVKFGNDVQHFVKVLRDGACKYFLW-VVKNSLNELVDYHRSTSVSRNQQIFLRdi-----</p> <p data-bbox="468 1885 1822 1969"><b>Proposed:</b> aliSize=89 (resi) RMSD=1.62 (Å)<br/>sep---WFFGCI SRSEAVRRIQAEGNATGAFILRVSEKPSADYVLSVRDTQAVRHYKIWRAGRLHLNEAVSLSLPELVNyhraqSLSH--G-LR AAPCrkhe<br/>---kphPWFFGKI PRAKAEEMLSK-QRHDGAFILRESE SAPGDFSLSVKFGNDVQHFVKVLRDGACKYFLWV-VKNSLNELVDYHRST--VSrnQqIFLRDI-----</p>                                      |



|     |                                                                                                                |   |       |                                                                                                                                                                                                                                                                                                                                                                                                                                                                                                                                                                                                                                                                                                                                                                                                                                                                                                                                                                                                                                                                                                                                                                                                                                                                                                                                                                                                                                                           |
|-----|----------------------------------------------------------------------------------------------------------------|---|-------|-----------------------------------------------------------------------------------------------------------------------------------------------------------------------------------------------------------------------------------------------------------------------------------------------------------------------------------------------------------------------------------------------------------------------------------------------------------------------------------------------------------------------------------------------------------------------------------------------------------------------------------------------------------------------------------------------------------------------------------------------------------------------------------------------------------------------------------------------------------------------------------------------------------------------------------------------------------------------------------------------------------------------------------------------------------------------------------------------------------------------------------------------------------------------------------------------------------------------------------------------------------------------------------------------------------------------------------------------------------------------------------------------------------------------------------------------------------|
| 816 | <p data-bbox="172 226 243 298">IrjaA<br/>(100)</p> <hr/> <p data-bbox="172 550 243 621">2aoaA<br/>(93)</p>     | C | 38.71 | <p data-bbox="474 180 1127 210"><b>TM-align:</b> aliSize=69 (resi) RMSD=2.62 (Å)</p> <p data-bbox="474 210 2041 264">sEPWFFGCTSRSEAVRRRQaeGNATGAFLIRVSEKPSADYVLSVRDTQAVRHYKIWRAGRLHNEAVSflslpelvnyhr-----AQslshglrlaapcrkhe-----<br/>       -HPWFFGKIPRAKAEEMLSK-QRHDGAFLIRESESAPGDFSLSVKFGNDVQHFVLRDGAQKYFLWVVK-----fnslnelvdyrST-----svsrnqqiflrd</p> <p data-bbox="474 315 1127 344"><b>SARST:</b> aliSize=85 (resi) RMSD=9.91 (Å)</p> <p data-bbox="474 344 1834 399">sepw---FFGCTSRSEAVRRRQaeGNATGAFLIRVSEKPSADYVLSVRDTQAVRHYKIWR--RaggRLHNeAVSLSLPELVNYHRAQSLSHGLRLAA--pcrkhe<br/>       ---hpwFFGKIPRAKAEEMLS--KQRHDGAFLIRESESAPGDFSLSVKFGNDVQHFVLRdgAG--KYFLW-VVKFNSLNELVYHRSTSVSRNQIIFLrd-----</p> <p data-bbox="474 449 1590 478"><b>BLAST:</b> aliSize=54 (resi) iden=41.94% (39/93) simi=58.06% (54/93)</p> <p data-bbox="474 478 1798 533">se-PWFEGCTSRSEAVRRRQaeGNATGAFLIRVSEKPSADYVLSVRDTQAVRHYKIWRAGRLHNeAVSLSLPELVNYHRAQSLSHGLRL----aapcrkhe<br/>       --hPWFEGKIPRAKAEEMLSKQRH-DGAFLIRESESAPGDFSLSVKFGNDVQHFVLRDGAQKYFL--WVVKFNSLNELVYHRSTSVSRNQIIFLrd-----</p> <p data-bbox="474 583 1127 613"><b>Proposed:</b> aliSize=89 (resi) RMSD=1.72 (Å)</p> <p data-bbox="474 613 1786 667">sep--WFFGCTSRSEAVRRRQaeGNATGAFLIRVSEKPSADYVLSVRDTQAVRHYKIWRAGRLHNeAVSLSLPELVNYHRAQSLSH--GLRLAAPcrkhe<br/>       ---hpWFFGKIPRAKAEEMLSK-QRHDGAFLIRESESAPGDFSLSVKFGNDVQHFVLRDGAQKYFLWVVKFNSLNELVYHRSTSVSRNQIIFLrd-----</p>                          |
| 817 | <p data-bbox="172 869 243 940">Ir1pB<br/>(100)</p> <hr/> <p data-bbox="172 1192 243 1264">2h46E<br/>(98)</p>   | C | 52.04 | <p data-bbox="474 831 1127 861"><b>TM-align:</b> aliSize=68 (resi) RMSD=1.32 (Å)</p> <p data-bbox="474 861 2113 915">gsfidiEPPEWHEGLSRHQAEENLMGK-DIGFFIIRASQSSPGDFSI SVRHEDDVQHFKVMRDTKGNFYLWTEKfpslnklvdyrrttsiskqkvflrd-----<br/>       ----M-KPHPWFFGKIPRAKAEEMLSKQRHDGAFLIRESESAPGDFSLSVKFGNDVQHFVLRDGAQKYFLWVVK-----kfnslnelvdyrstsvsrnqqiflrdie</p> <p data-bbox="474 966 1127 995"><b>SARST:</b> aliSize=93 (resi) RMSD=11.40 (Å)</p> <p data-bbox="474 995 1798 1050">gsfidiEPPEWHEGLSRHQAEENLMGK-DIGFFIIRASQSSPGDFSI SVRHEDDVQHFKVMRDTKGNFYLWTEKfpslnklvdyrrttsiskqkvflrd----d<br/>       -----mKPHPWFFGKIPRAKAEEMLSKQRHDGAFLIRESESAPGDFSLSVKFGNDVQHFVLRDGAQKYFLWVVKFNSLNELVYHRSTSVSRNQIIFLrdie</p> <p data-bbox="474 1100 1590 1129"><b>BLAST:</b> aliSize=69 (resi) iden=52.04% (51/98) simi=70.41% (69/98)</p> <p data-bbox="474 1129 1834 1184">gsfidiefpe----WHEGLSRHQAEENLMG-KDIGFFIIRASQSSPGDFSI SVRHEDDVQHFKVMRDTKGNFYLWTEKfpslnklvdyrrttsiskqkvflrd--<br/>       -----mKPHPWFFGKIPRAKAEEMLSKQRHDGAFLIRESESAPGDFSLSVKFGNDVQHFVLRDGAQKYFLWVVKFNSLNELVYHRSTSVSRNQIIFLrdie</p> <p data-bbox="474 1234 1127 1264"><b>Proposed:</b> aliSize=95 (resi) RMSD=0.97 (Å)</p> <p data-bbox="474 1264 1774 1318">gsfidiEPPEWHEGLSRHQAEENLMGK-DIGFFIIRASQSSPGDFSI SVRHEDDVQHFKVMRDTKGNFYLWTEKfpslnklvdyrrttsiskqkvflrd--<br/>       ----M-KPHPWFFGKIPRAKAEEMLSKQRHDGAFLIRESESAPGDFSLSVKFGNDVQHFVLRDGAQKYFLWVVKFNSLNELVYHRSTSVSRNQIIFLrdie</p>         |
| 818 | <p data-bbox="172 1512 243 1583">Ir1pB<br/>(100)</p> <hr/> <p data-bbox="172 1835 243 1906">2h5kB<br/>(96)</p> | C | 53.13 | <p data-bbox="474 1474 1127 1503"><b>TM-align:</b> aliSize=66 (resi) RMSD=1.13 (Å)</p> <p data-bbox="474 1503 2113 1558">gsfidiefpeEPPEWHEGLSRHQAEENLMGK-DIGFFIIRASQSSPGDFSI SVRHEDDVQHFKVMRDTKGNFYLWTEKfpslnklvdyrrttsiskqkvflrd-----<br/>       -----PHPWFFGKIPRAKAEEMLSKQRHDGAFLIRESESAPGDFSLSVKFGNDVQHFVLRDGAQKYFLWVVK-----kfnslnelvdyrstsvsrnqqiflrdie</p> <p data-bbox="474 1608 1127 1638"><b>SARST:</b> aliSize=90 (resi) RMSD=11.64 (Å)</p> <p data-bbox="474 1638 1798 1692">gsfidiefpe--EPWHEGLSRHQAEENLMGK-DIGFFIIRASQSSPGDFSI SVRHEDDVQHFKVMRDTKGNFYLWTEKfpslnklvdyrrttsiskqkvflrd--d<br/>       -----phPWFEGKIPRAKAEEMLSKQRHDGAFLIRESESAPGDFSLSVKFGNDVQHFVLRDGAQKYFLWVVKFNSLNELVYHRSTSVSRNQIIFLrdie</p> <p data-bbox="474 1743 1590 1772"><b>BLAST:</b> aliSize=69 (resi) iden=53.68% (51/96) simi=72.63% (69/96)</p> <p data-bbox="474 1772 1798 1827">gsfidiefpe---WHEGLSRHQAEENLMG-KDIGFFIIRASQSSPGDFSI SVRHEDDVQHFKVMRDTKGNFYLWTEKfpslnklvdyrrttsiskqkvflrd--<br/>       -----phpWFFGKIPRAKAEEMLSKQRHDGAFLIRESESAPGDFSLSVKFGNDVQHFVLRDGAQKYFLWVVKFNSLNELVYHRSTSVSRNQIIFLrdie</p> <p data-bbox="474 1877 1127 1906"><b>Proposed:</b> aliSize=93 (resi) RMSD=0.79 (Å)</p> <p data-bbox="474 1906 1774 1961">gsfidiefpeEPPEWHEGLSRHQAEENLMGK-DIGFFIIRASQSSPGDFSI SVRHEDDVQHFKVMRDTKGNFYLWTEKfpslnklvdyrrttsiskqkvflrd--<br/>       -----PHPWFFGKIPRAKAEEMLSKQRHDGAFLIRESESAPGDFSLSVKFGNDVQHFVLRDGAQKYFLWVVKFNSLNELVYHRSTSVSRNQIIFLrdie</p> |

|     |                                                                                                                |   |       |                                                                                                                                                                                                                                                                                                                                                                                                                                                                                                                                                                                                                                                                                                                                                                                                                                                                                                                                                                                                                                                                                                                                                                                                                                                                                                                                                                                                                        |
|-----|----------------------------------------------------------------------------------------------------------------|---|-------|------------------------------------------------------------------------------------------------------------------------------------------------------------------------------------------------------------------------------------------------------------------------------------------------------------------------------------------------------------------------------------------------------------------------------------------------------------------------------------------------------------------------------------------------------------------------------------------------------------------------------------------------------------------------------------------------------------------------------------------------------------------------------------------------------------------------------------------------------------------------------------------------------------------------------------------------------------------------------------------------------------------------------------------------------------------------------------------------------------------------------------------------------------------------------------------------------------------------------------------------------------------------------------------------------------------------------------------------------------------------------------------------------------------------|
| 819 | <p data-bbox="166 226 243 298">1r1pB<br/>(100)</p> <hr/> <p data-bbox="166 550 243 621">2aobB<br/>(93)</p>     | C | 53.76 | <p data-bbox="468 180 1127 210"><b>TM-align:</b> aliSize=64 (resi) RMSD=1.68 (Å)</p> <p data-bbox="468 210 2101 264">gsfidiefpeWHEGLSRHQAEENLMGK-DIGFFIIRASQSSPGDFSISVRHEDDVQHFVKVMDTKGNFYFLWTEKfpslnklvdyyr-----Tiskqkqvflrd-----<br/>-----pWFGKIPRAKAEEMSKQRHDGAFLIRESE-SAPgDfSLSVKFGNDVQHFVKVLRDGAckYFLWVV-----kfnslnelvdyhrs-----svsrnqqiflrdi</p> <p data-bbox="468 315 1127 344"><b>SARST:</b> aliSize=89 (resi) RMSD=10.22 (Å)</p> <p data-bbox="468 344 1786 399">gsfidiefpeWHEGLSRHQAEENLMGK-DIGFFIIRASQSSPGDFSISVRHEDDVQHFVKVMDTKGNFYFLWTEKfPSLNKLVDYRITTSISKQKQVFLR---d<br/>-----pWFGKIPRAKAEEMSKQRHDGAFLIRESEAPGDfSLSVKFGNDVQHFVKVLRDGAckYFLWVVKfNSLNElVDYHRSTSVSRNOQIFLRdi</p> <p data-bbox="468 449 1590 478"><b>BLAST:</b> aliSize=69 (resi) iden=54.84% (51/93) simi=74.19% (69/93)</p> <p data-bbox="468 478 1774 533">gsfidiefpeWHEGLSRHQAEENLMG-KDIGFFIIRASQSSPGDFSISVRHEDDVQHFVKVMDTKGNFYFLWTEKfPSLNKLVDYRITTSISKQKQVFLRD-<br/>-----pWFGKIPRAKAEEMSKQRHDGAFLIRESEAPGDfSLSVKFGNDVQHFVKVLRDGAckYFLWVVKfNSLNElVDYHRSTSVSRNOQIFLRdi</p> <p data-bbox="468 583 1127 613"><b>Proposed:</b> aliSize=90 (resi) RMSD=1.22 (Å)</p> <p data-bbox="468 613 1774 667">gsfidiefpeWHEGLSRHQAEENLMGK-DIGFFIIRASQSSPGDFSISVRHEDDVQHFVKVMDTKGNFYFLWTEKfPSLNKLVDYRITTSISKQKQVFLRD-<br/>-----pWFGKIPRAKAEEMSKQRHDGAFLIRESE-SAPgDfSLSVKFGNDVQHFVKVLRDGAckYFLWVVKfNSLNElVDYHRSTSVSRNOQIFLRdi</p>                         |
| 820 | <p data-bbox="166 869 243 940">1r1pB<br/>(100)</p> <hr/> <p data-bbox="166 1180 243 1251">2aobA<br/>(96)</p>   | C | 53.13 | <p data-bbox="468 823 1127 852"><b>TM-align:</b> aliSize=69 (resi) RMSD=1.80 (Å)</p> <p data-bbox="468 852 2077 907">gsfidIEFpeWHEGLSRHQAEENLMGK-DIGFFIIRASQSSPGDFSISVRHEDDVQHFVKVMDTKGNFYFLWTEkfpslnklvdyyr-----Tiskqkqvflrd-----<br/>-----KPHPWFGKIPRAKAEEMSKQRHDGAFLIRESEAPGDfSLSVKFGNDVQHFVKVLRDGAckYFLWVV-----kfnslnelvdyhrST-----svsrnqqiflrdi</p> <p data-bbox="468 957 1127 987"><b>SARST:</b> aliSize=90 (resi) RMSD=10.06 (Å)</p> <p data-bbox="468 987 1810 1041">gsfidiefp---EWHEGLSRHQAEENLMGK-DIGFFIIRASQSSPGDFSISVRHEDDVQHFVKVMDTKGNFYFLWTEKfPSLNKLVDYRITTSISKQKQVFLR---d<br/>-----kphPWFGKIPRAKAEEMSKQRHDGAFLIRESEAPGDfSLSVKFGNDVQHFVKVLRDGAckYFLWVVKfNSLNElVDYHRSTSVSRNOQIFLRdi</p> <p data-bbox="468 1092 1590 1121"><b>BLAST:</b> aliSize=69 (resi) iden=53.12% (51/96) simi=71.88% (69/96)</p> <p data-bbox="468 1121 1804 1176">gsfidiefpe---WHEGLSRHQAEENLMG-KDIGFFIIRASQSSPGDFSISVRHEDDVQHFVKVMDTKGNFYFLWTEKfPSLNKLVDYRITTSISKQKQVFLRD-<br/>-----kphPWFGKIPRAKAEEMSKQRHDGAFLIRESEAPGDfSLSVKFGNDVQHFVKVLRDGAckYFLWVVKfNSLNElVDYHRSTSVSRNOQIFLRdi</p> <p data-bbox="468 1226 1127 1255"><b>Proposed:</b> aliSize=94 (resi) RMSD=1.05 (Å)</p> <p data-bbox="468 1255 1762 1310">gsfidiEFPEWHEGLSRHQAEENLMGK-DIGFFIIRASQSSPGDFSISVRHEDDVQHFVKVMDTKGNFYFLWTEKfPSLNKLVDYRITTSISKQKQVFLRD-<br/>-----KPHPWFGKIPRAKAEEMSKQRHDGAFLIRESEAPGDfSLSVKFGNDVQHFVKVLRDGAckYFLWVVKfNSLNElVDYHRSTSVSRNOQIFLRdi</p> |
| 821 | <p data-bbox="166 1512 243 1583">1r1pB<br/>(100)</p> <hr/> <p data-bbox="166 1843 243 1915">2aoaA<br/>(93)</p> | C | 55.91 | <p data-bbox="468 1474 1127 1503"><b>TM-align:</b> aliSize=67 (resi) RMSD=1.63 (Å)</p> <p data-bbox="468 1503 2065 1558">gsfidieFpeWHEGLSRHQAEENLMGK-DIGFFIIRASQSSPGDFSISVRHEDDVQHFVKVMDTKGNFYFLWTEkfpslnklvdyyr-----Tiskqkqvflrd-----<br/>-----HPWFGKIPRAKAEEMSKQRHDGAFLIRESEAPGDfSLSVKFGNDVQHFVKVLRDGAckYFLWVV-----kfnslnelvdyhrST-----svsrnqqiflrd</p> <p data-bbox="468 1608 1127 1638"><b>SARST:</b> aliSize=87 (resi) RMSD=9.75 (Å)</p> <p data-bbox="468 1638 1810 1692">gsfidiefp-EWHEGLSRHQAEENLMGK-DIGFFIIRASQSSPGDFSISVRHEDDVQHFVKVMDTKGNFYFLWTEKfPSLNKLVDYRITTSISKQKQV----flrd<br/>-----hPWFGKIPRAKAEEMSKQRHDGAFLIRESEAPGDfSLSVKFGNDVQHFVKVLRDGAckYFLWVVKfNSLNElVDYHRSTSVSRNOQIFLRdi</p> <p data-bbox="468 1743 1590 1772"><b>BLAST:</b> aliSize=69 (resi) iden=54.84% (51/93) simi=74.19% (69/93)</p> <p data-bbox="468 1772 1774 1827">gsfidiefpe--WHEGLSRHQAEENLMG-KDIGFFIIRASQSSPGDFSISVRHEDDVQHFVKVMDTKGNFYFLWTEKfPSLNKLVDYRITTSISKQKQVFLRD-<br/>-----hpWFGKIPRAKAEEMSKQRHDGAFLIRESEAPGDfSLSVKFGNDVQHFVKVLRDGAckYFLWVVKfNSLNElVDYHRSTSVSRNOQIFLRdi</p> <p data-bbox="468 1877 1127 1906"><b>Proposed:</b> aliSize=92 (resi) RMSD=0.98 (Å)</p> <p data-bbox="468 1906 1751 1961">gsfidieFpeWHEGLSRHQAEENLMGK-DIGFFIIRASQSSPGDFSISVRHEDDVQHFVKVMDTKGNFYFLWTEKfPSLNKLVDYRITTSISKQKQVFLRD-<br/>-----HPWFGKIPRAKAEEMSKQRHDGAFLIRESEAPGDfSLSVKFGNDVQHFVKVLRDGAckYFLWVVKfNSLNElVDYHRSTSVSRNOQIFLRdi</p>      |

|     |                                                    |   |       |                                                                                                                                                                                                                                                                                                                                                                                                                                                                                                                                                                                                                                                                                                                                                                                                                                                                                                                                                                                                                                                                                                                                                                                                                                                      |
|-----|----------------------------------------------------|---|-------|------------------------------------------------------------------------------------------------------------------------------------------------------------------------------------------------------------------------------------------------------------------------------------------------------------------------------------------------------------------------------------------------------------------------------------------------------------------------------------------------------------------------------------------------------------------------------------------------------------------------------------------------------------------------------------------------------------------------------------------------------------------------------------------------------------------------------------------------------------------------------------------------------------------------------------------------------------------------------------------------------------------------------------------------------------------------------------------------------------------------------------------------------------------------------------------------------------------------------------------------------|
| 822 | <p>1fhsA<br/>(112)</p> <hr/> <p>2h5kB<br/>(96)</p> | C | 90.63 | <p><b>TM-align:</b> aliSize=66 (resi) RMSD=2.14 (Å)<br/> giemkPHPWFFGKI PRAKAEEMLSKQRHDGAFI RESE-SAPgDFSLSVKFGNDVQHFVLRD GAGKYFLWVVKfnslnelvdyrstsvsrnqqiflrdieqvpqqptyvqa-----<br/> -----PHPWFFGKI PRAKAEEMLSKQRHDGAFI RESEsAPG-DFSLSVKFGNDVQHFVLRD GAGKYFLWVVK-----kfnslnelvdyrstsvsrnqqiflrdie</p> <p><b>SARST:</b> aliSize=90 (resi) RMSD=12.11 (Å)<br/> giemkphpw----FFGKI PRAKAEEMLSKQRHDGAFI RESESAPGDFSLSVKFGNDVQHFVLRD GAGKYFLWVVKFNSLNELVDYHRSTSVSRNQQIFLRD-ievppqqptyvqa<br/> -----phpwFFGKI PRAKAEEMLSKQRHDGAFI RESESAPGDFSLSVKFGNDVQHFVLRD GAGKYFLWVVKFNSLNELVDYHRSTSVSRNQQIFLRDi-----</p> <p><b>BLAST:</b> aliSize=95 (resi) iden=100.00% (95/96) simi=100.00% (95/96)<br/> giemkPHPWFFGKI PRAKAEEMLSKQRHDGAFI RESESAPGDFSLSVKFGNDVQHFVLRD GAGKYFLWVVKFNSLNELVDYHRSTSVSRNQQIFLRD-ievppqqptyvqa<br/> -----PHPWFFGKI PRAKAEEMLSKQRHDGAFI RESESAPGDFSLSVKFGNDVQHFVLRD GAGKYFLWVVKFNSLNELVDYHRSTSVSRNQQIFLRDi-----</p> <p><b>Proposed:</b> aliSize=94 (resi) RMSD=1.73 (Å)<br/> giemkPpHPWFFGKI PRAKAEEMLSKQRHDGAFI RESE-SAPgDFSLSVKFGNDVQHFVLRDgAG-KYFLWVVKFNSLNELVDYHRSTSVSRNQQIFLRD-ievppqqptyvqa<br/> ----P-HPWFFGKI PRAKAEEMLSKQRHDGAFI RESEsAPG-DFSLSVKFGNDVQHFVLRD-GAGKYFLWVVKFNSLNELVDYHRSTSVSRNQQIFLRD-E-----</p>                 |
| 823 | <p>1fhsA<br/>(112)</p> <hr/> <p>2aobB<br/>(93)</p> | C | 95.70 | <p><b>TM-align:</b> aliSize=65 (resi) RMSD=1.80 (Å)<br/> giemkphpwFFGKI PRAKAEEMLSKQRHDGAFI RESESAPGDFSLSVKFGNDVQHFVLRDgAG-KYFLWVVKfnslnelvdyrstsvsrnqqiflrdieqvpqqptyvqa-----<br/> -----P-WFFGKI PRAKAEEMLSKQRHDGAFI RESESAPGDFSLSVKFGNDVQHFVLRD-GAGKYFLWVVK-----kfnslnelvdyrstsvsrnqqiflrdie</p> <p><b>SARST:</b> aliSize=85 (resi) RMSD=10.69 (Å)<br/> giemkphpwffgki-----PRAKAEEMLSKQRHDGAFI RESESAPGDFSLSVKFGNDVQHFVLRD GAGKYFLWVVKFNSLNELVDYHRSTSVSRNQQIFLRD-ievppqqptyvqa<br/> -----pwffgkiPRAKAEEMLSKQRHDGAFI RESESAPGDFSLSVKFGNDVQHFVLRD GAGKYFLWVVKFNSLNELVDYHRSTSVSRNQQIFLRDi-----</p> <p><b>BLAST:</b> aliSize=93 (resi) iden=100.00% (93/93) simi=100.00% (93/93)<br/> giemkphwFFGKI PRAKAEEMLSKQRHDGAFI RESESAPGDFSLSVKFGNDVQHFVLRD GAGKYFLWVVKFNSLNELVDYHRSTSVSRNQQIFLRD-ievppqqptyvqa<br/> -----wFFGKI PRAKAEEMLSKQRHDGAFI RESESAPGDFSLSVKFGNDVQHFVLRD GAGKYFLWVVKFNSLNELVDYHRSTSVSRNQQIFLRDi-----</p> <p><b>Proposed:</b> aliSize=92 (resi) RMSD=1.50 (Å)<br/> giemkphpwFFGKI PRAKAEEMLSKQRHDGAFI RESESAPGDFSLSVKFGNDVQHFVLRDgAG-KYFLWVVKFNSLNELVDYHRSTSVSRNQQIFLRD-ievppqqptyvqa<br/> -----P-WFFGKI PRAKAEEMLSKQRHDGAFI RESESAPGDFSLSVKFGNDVQHFVLRD-GAGKYFLWVVKFNSLNELVDYHRSTSVSRNQQIFLRD-E-----</p>                               |
| 824 | <p>1fhsA<br/>(112)</p> <hr/> <p>2aobA<br/>(96)</p> | C | 91.67 | <p><b>TM-align:</b> aliSize=68 (resi) RMSD=2.49 (Å)<br/> giemkKPHPWFFGKI PRAKAEEMLSKQRHDGAFI RESE-SAPgDFSLSVKFGNDVQHFVLRDgAG-KYFLWVVKfnslnelvdyr-----STsvsrnqqiflrdieqvpqqptyvqa-----<br/> ----KPHPWFFGKI PRAKAEEMLSKQRHDGAFI RESEsAPG-DFSLSVKFGNDVQHFVLRD-GAGKYFLWVVK-----kfnslnelvdyrST-----svsrnqqiflrdie</p> <p><b>SARST:</b> aliSize=90 (resi) RMSD=10.42 (Å)<br/> giemkphpw----FFGKI PRAKAEEMLSKQRHDGAFI RESESAPGDFSLSVKFGNDVQHFVLRD GAGKYFLWVVKFNSLNELVDYHRSTSVSRNQQIFLRD-ievppqqptyvqa<br/> -----kphpwFFGKI PRAKAEEMLSKQRHDGAFI RESESAPGDFSLSVKFGNDVQHFVLRD GAGKYFLWVVKFNSLNELVDYHRSTSVSRNQQIFLRDi-----</p> <p><b>BLAST:</b> aliSize=96 (resi) iden=100.00% (96/96) simi=100.00% (96/96)<br/> giemkKPHPWFFGKI PRAKAEEMLSKQRHDGAFI RESESAPGDFSLSVKFGNDVQHFVLRD GAGKYFLWVVKFNSLNELVDYHRSTSVSRNQQIFLRD-ievppqqptyvqa<br/> ----KPHPWFFGKI PRAKAEEMLSKQRHDGAFI RESESAPGDFSLSVKFGNDVQHFVLRD GAGKYFLWVVKFNSLNELVDYHRSTSVSRNQQIFLRDi-----</p> <p><b>Proposed:</b> aliSize=93 (resi) RMSD=1.70 (Å)<br/> giemk-KPHPWFFGKI PRAKAEEMLSKQRHDGAFI RESE-SAPgDFSLSVKFGNDVQHFVLRDgAG-KYFLWVVKFNSLNELVDYHRSTSVSRNQQIFLRD-ievppqqptyvqa<br/> ----k-KPHPWFFGKI PRAKAEEMLSKQRHDGAFI RESEsAPG-DFSLSVKFGNDVQHFVLRD-GAGKYFLWVVKFNSLNELVDYHRSTSVSRNQQIFLRD-E-----</p> |

|     |                                               |   |       |                                                                                                                                                                                                                                                                                                                                                                                                                                                                                                                                                                                                                                                                                                                                                                                                                                                                                                                                                                                                                                                                                                                                                                                                                                                                                                           |
|-----|-----------------------------------------------|---|-------|-----------------------------------------------------------------------------------------------------------------------------------------------------------------------------------------------------------------------------------------------------------------------------------------------------------------------------------------------------------------------------------------------------------------------------------------------------------------------------------------------------------------------------------------------------------------------------------------------------------------------------------------------------------------------------------------------------------------------------------------------------------------------------------------------------------------------------------------------------------------------------------------------------------------------------------------------------------------------------------------------------------------------------------------------------------------------------------------------------------------------------------------------------------------------------------------------------------------------------------------------------------------------------------------------------------|
| 825 | <p>1fhsA<br/>(112)</p> <p>2aoaA<br/>(93)</p>  | C | 92.47 | <p><b>TM-align:</b> aliSize=66 (resi) RMSD=2.15 (Å)<br/> giemkphPWFFGKI PRAKAEEMLSKQRHDGAFI RESE -SAPgDFSLSVKFGNDVQHFVKVLRDgAG-KYFLWVVKfns lnelvdyhr-----STsvs rnqqiflrdieqvpqqptyvqa-----<br/> -----HPWFFGKI PRAKAEEMLSKQRHDGAFI RESEsAPG-DFSLSVKFGNDVQHFVKVLRD-GAGKYFLWVV-----kfnslnelvdyhrST-----svs rnqqiflrd</p> <p><b>SARST:</b> aliSize=86 (resi) RMSD=9.63 (Å)<br/> giemkphpw---FFGKI PRAKAEEMLSKQRHDGAFI RESEsAPGDFSLSVKFGNDVQHFVKVLRDgAGKYFLWVVKFNSLNELVDYHRSTSVSRNQOI----flrdieqvpqqptyvqa<br/> -----hpwFFGKI PRAKAEEMLSKQRHDGAFI RESEsAPGDFSLSVKFGNDVQHFVKVLRDgAGKYFLWVVKFNSLNELVDYHRSTSVSRNQOIflrd-----</p> <p><b>BLAST:</b> aliSize=93 (resi) iden=100.00% (93/93) simi=100.00% (93/93)<br/> giemkphPWFFGKI PRAKAEEMLSKQRHDGAFI RESEsAPGDFSLSVKFGNDVQHFVKVLRDgAGKYFLWVVKFNSLNELVDYHRSTSVSRNQOIFLRDIEQVPQQPTYVQA<br/> -----HPWFFGKI PRAKAEEMLSKQRHDGAFI RESEsAPGDFSLSVKFGNDVQHFVKVLRDgAGKYFLWVVKFNSLNELVDYHRSTSVSRNQOIFLRD-----</p> <p><b>Proposed:</b> aliSize=91 (resi) RMSD=1.57 (Å)<br/> giemkphPWFFGKI PRAKAEEMLSKQRHDGAFI RESE -SAPgDFSLSVKFGNDVQHFVKVLRDgAG-KYFLWVVKFNSLNELVDYHRSTSVSRNQOIFLRDIEQVPQQPTYVQA<br/> -----HPWFFGKI PRAKAEEMLSKQRHDGAFI RESEsAPG-DFSLSVKFGNDVQHFVKVLRD-GAGKYFLWVVKFNSLNELVDYHRSTSVSRNQOIFLRD-----</p>                                                      |
| 826 | <p>2zjzA<br/>(116)</p> <p>115eA<br/>(101)</p> | C | 25.74 | <p><b>TM-align:</b> aliSize=55 (resi) RMSD=2.35 (Å)<br/> mQCNEANSCTGVELYIYIIRGDCINEDHPHATSTINLNYITGNDNRLEYPGESf gsscvkta lndght l tasc kgadgqyhdssmdl nyvvgnsygympcrasn-----Adhvlksss-----E-----<br/> -LGKFSQTCYNSAIQGSVLTSTCERITNGGYNTSSIDLNSV IENV DGS LK WQPSN-----fietcrntqlagsselaaecktraqqfvstkinlddhianidgtlkye</p> <p><b>SARST:</b> aliSize=95 (resi) RMSD=15.55 (Å)<br/> mq-CNEANSCTGVELYIYIIRGDCINEDHPHATSTINLNYITGNDNRLEYPGESFGSSCVKIALNDGHTITASC KGADGQYHDSSMDLNYVVGNSYGYMEPCRASN-----adhvlkssse<br/> --LGKFSQTCYNSAIQGSVLTSTCERITNGGYNTSSIDLNSV IENV DGS LK WQPSNF IETCRNTQLAGSSELA AECKTRAQQFVSTKINLDDHIANIDGTLKYE-----tlkye-----</p> <p><b>BLAST:</b> aliSize=47 (resi) iden=25.74% (26/101) simi=46.53% (47/101)<br/> mqcn---ANSCTGVELYIYIIRGDCINEDHPHATSTINLNYITGNDNRLEYPGESFGSSCVKIALNDGHTITASC KGADGQYHDSSMDLNYVVGNSYGYME--pcrasnadhvlkssse<br/> ----lgkfsqtcynsaiqgsvltstcERTNGGYNTSSIDLNSV IENV DGS LK WQPSNF IETCRNTQLAGSSELA AECKTRAQQFVSTKINLDDHIANIDGTLKYE-----</p> <p><b>Proposed:</b> aliSize=100 (resi) RMSD=1.27 (Å)<br/> mQCNEANSCTGVELYIYIIRGDCINEDHPHATSTINLNYITGNDNRLEYP-gESFGSSCVKIALNDGHTITASC KGADGQYHDSSMDLNYVVGNSYGYMEPCRASNADHVLKSSSE<br/> -LGKFSQTCYNSAIQGSVLTSTCERITNGGYNTSSIDLNSV IENV DGS LK WQp-SNF IETCRNTQLAGSSELA AECKTRAQQFVSTKINLDDHIANIDGTLKYE-----</p> |
| 827 | <p>2z21A<br/>(102)</p> <p>115eA<br/>(101)</p> | N | 94.06 | <p><b>TM-align:</b> aliSize=52 (resi) RMSD=1.34 (Å)<br/> LGNFSQACYNsAIQGSVLTSTCIRINGGYNTSSIDLNSV IENV DGS LK WQSNf ietcrntqlagsselaaecktraqqfvstkinlddhiaaidgtlkyel-----<br/> LGKFSQTCYNSAIQGSVLTSTCERITNGGYNTSSIDLNSV IENV DGS LK WQPS-----nfietcrntqlagsselaaecktraqqfvstkinlddhianidgtlkye</p> <p><b>SARST:</b> aliSize=99 (resi) RMSD=15.83 (Å)<br/> l-LGNFSQACYNsAIQGSVLTSTCIRINGGYNTSSIDLNSV IENV DGS LK WQSNF IETCRNTQLAGSSELA AECKTRAQQFVSTKINLDDHIAAIDGTLKYE--el<br/> -LGKFSQTCYNSAIQGSVLTSTCERITNGGYNTSSIDLNSV IENV DGS LK WQPSNF IETCRNTQLAGSSELA AECKTRAQQFVSTKINLDDHIANIDGTLKYE--e--</p> <p><b>BLAST:</b> aliSize=96 (resi) iden=95.05% (96/101) simi=95.05% (96/101)<br/> LGNFSQACYNsAIQGSVLTSTCIRINGGYNTSSIDLNSV IENV DGS LK WQSNF IETCRNTQLAGSSELA AECKTRAQQFVSTKINLDDHIAAIDGTLKYE1<br/> LGKFSQTCYNSAIQGSVLTSTCERITNGGYNTSSIDLNSV IENV DGS LK WQPSNF IETCRNTQLAGSSELA AECKTRAQQFVSTKINLDDHIANIDGTLKYE-</p> <p><b>Proposed:</b> aliSize=100 (resi) RMSD=0.79 (Å)<br/> LGNFSQACYNsAIQGSVLTSTCIRINGGYNTSSIDLNSV IENV DGS LK WQ-sNF IETCRNTQLAGSSELA AECKTRAQQFVSTKINLDDHIAAIDGTLKYE1<br/> LGKFSQTCYNSAIQGSVLTSTCERITNGGYNTSSIDLNSV IENV DGS LK WQp-s-NF IETCRNTQLAGSSELA AECKTRAQQFVSTKINLDDHIANIDGTLKYE-</p>                                                                                |

|     |                                               |   |       |                                                                                                                                                                                                                                                                                                                                                                                                                                                                                                                                                                                                                                                                                                                                                                                                                                                                                                                                                                                                                                                                                                                                                                                                                                                                                  |
|-----|-----------------------------------------------|---|-------|----------------------------------------------------------------------------------------------------------------------------------------------------------------------------------------------------------------------------------------------------------------------------------------------------------------------------------------------------------------------------------------------------------------------------------------------------------------------------------------------------------------------------------------------------------------------------------------------------------------------------------------------------------------------------------------------------------------------------------------------------------------------------------------------------------------------------------------------------------------------------------------------------------------------------------------------------------------------------------------------------------------------------------------------------------------------------------------------------------------------------------------------------------------------------------------------------------------------------------------------------------------------------------|
| 828 | <p>2z21A<br/>(102)</p> <p>1lomA<br/>(101)</p> | N | 94.06 | <p>TM-align: aliSize=53 (resi) RMSD=2.05 (Å)<br/> gnfsqacynsaiqgsvltstcirtnggyntssidn-----svienvdgs lkw-----OGSNFIETCRNTQLAGSSELAEECKTRAQQFVSTKINLDDHIAAIDGTLKYE1<br/> -----lgkfsqt cynsaiqgsvltstcertnggyntssidn-----vienvdgs lkwOSPNIETCRNTQLAGSSELAEECKTRAQQFVSTKINLDDHIANIDGTLKYE-</p> <p>SARST: aliSize=99 (resi) RMSD=16.41 (Å)<br/> 1-<b>GNFSQACYN</b>SAIQGSVLTSTCI<b>RTNGGYNTSSIDLNSV</b>IENVDGSLKW<b>OGSNFIETCRNTQLAGSSELAEECKTRAQQFVSTKINLDDHIAAIDGTLK</b>-e1<br/> -1<b>GKFSQTCYNSA</b>IQGSVLTSTC<b>ERTNGGYNTSSIDLNSV</b>IENVDGSLKW<b>OSPNIETCRNTQLAGSSELAEECKTRAQQFVSTKINLDDHIANIDGTLK</b>Y-e--</p> <p>BLAST: aliSize=95 (resi) iden=94.06% (95/101) simi=94.06% (95/101)<br/> <b>GNFSQACYN</b>SAIQGSVLTSTCI<b>RTNGGYNTSSIDLNSV</b>IENVDGSLKW<b>OGSNFIETCRNTQLAGSSELAEECKTRAQQFVSTKINLDDHIAAIDGTLK</b>YE1<br/> <b>LKFSQTCYNSA</b>IQGSVLTSTC<b>ERTNGGYNTSSIDLNSV</b>IENVDGSLKW<b>OSPNIETCRNTQLAGSSELAEECKTRAQQFVSTKINLDDHIANIDGTLK</b>YE-</p> <p>Proposed: aliSize=100 (resi) RMSD=0.71 (Å)<br/> <b>GNFSQACYN</b>SAIQGSVLTSTCI<b>RTNGGYNTSSIDLNSV</b>IENVDGSLKW<b>OG-sNFIETCRNTQLAGSSELAEECKTRAQQFVSTKINLDDHIAAIDGTLK</b>YE1<br/> <b>LKFSQTCYNSA</b>IQGSVLTSTC<b>ERTNGGYNTSSIDLNSV</b>IENVDGSLKW<b>OSP-NFIETCRNTQLAGSSELAEECKTRAQQFVSTKINLDDHIANIDGTLK</b>YE-</p>      |
| 829 | <p>2rdkA<br/>(101)</p> <p>115eA<br/>(101)</p> | N | 93.07 | <p>TM-align: aliSize=54 (resi) RMSD=2.03 (Å)<br/> gnfsqacynsaiqgsvltstcirtnggyntssidn-----NSVIenvdgs lkw-----GS-NFIETCRNTQLAGSSELAEECKTRAQQFVSTKINLDDHIAAIDGTLKYE1<br/> -----lgkfsqt cynsaiqgsvltstcertnggyntssidn-----NSVIenvdgs lkwQPSNFIETCRNTQLAGSSELAEECKTRAQQFVSTKINLDDHIANIDGTLKYE-</p> <p>SARST: aliSize=98 (resi) RMSD=15.75 (Å)<br/> g--<b>NFSQACYN</b>SAIQGSVLTSTCI<b>RTNGGYNTSSIDLNSV</b>IENVDGSLKW<b>OGSNFIETCRNTQLAGSSELAEECKTRAQQFVSTKINLDDHIAAIDGTLK</b>-e1<br/> -1<b>GKFSQTCYNSA</b>IQGSVLTSTC<b>ERTNGGYNTSSIDLNSV</b>IENVDGSLKW<b>QPSNFIETCRNTQLAGSSELAEECKTRAQQFVSTKINLDDHIANIDGTLK</b>Y-e--</p> <p>BLAST: aliSize=95 (resi) iden=94.06% (95/101) simi=94.06% (95/101)<br/> <b>GNFSQACYN</b>SAIQGSVLTSTCI<b>RTNGGYNTSSIDLNSV</b>IENVDGSLKW<b>OGSNFIETCRNTQLAGSSELAEECKTRAQQFVSTKINLDDHIAAIDGTLK</b>YE1<br/> <b>LKFSQTCYNSA</b>IQGSVLTSTC<b>ERTNGGYNTSSIDLNSV</b>IENVDGSLKW<b>QPSNFIETCRNTQLAGSSELAEECKTRAQQFVSTKINLDDHIANIDGTLK</b>YE-</p> <p>Proposed: aliSize=99 (resi) RMSD=0.79 (Å)<br/> <b>GNFSQACYN</b>SAIQGSVLTSTCI<b>RTNGGYNTSSIDLNSV</b>IENVDGSLKW<b>OG-sNFIETCRNTQLAGSSELAEECKTRAQQFVSTKINLDDHIAAIDGTLK</b>YE1<br/> <b>LKFSQTCYNSA</b>IQGSVLTSTC<b>ERTNGGYNTSSIDLNSV</b>IENVDGSLKW<b>QPS-NFIETCRNTQLAGSSELAEECKTRAQQFVSTKINLDDHIANIDGTLK</b>YE-</p> |
| 830 | <p>2rdkA<br/>(101)</p> <p>1lomA<br/>(101)</p> | N | 93.07 | <p>TM-align: aliSize=53 (resi) RMSD=2.05 (Å)<br/> gnfsqacynsaiqgsvltstcirtnggyntssidn-----svienvdgs lkw-----OGSNFIETCRNTQLAGSSELAEECKTRAQQFVSTKINLDDHIAAIDGTLKYE1<br/> -----lgkfsqt cynsaiqgsvltstcertnggyntssidn-----vienvdgs lkwOSPNIETCRNTQLAGSSELAEECKTRAQQFVSTKINLDDHIANIDGTLKYE-</p> <p>SARST: aliSize=98 (resi) RMSD=16.32 (Å)<br/> g--<b>NFSQACYN</b>SAIQGSVLTSTCI<b>RTNGGYNTSSIDLNSV</b>IENVDGSLKW<b>OGSNFIETCRNTQLAGSSELAEECKTRAQQFVSTKINLDDHIAAIDGTLK</b>-e1<br/> -1<b>GKFSQTCYNSA</b>IQGSVLTSTC<b>ERTNGGYNTSSIDLNSV</b>IENVDGSLKW<b>OSPNIETCRNTQLAGSSELAEECKTRAQQFVSTKINLDDHIANIDGTLK</b>Y-e--</p> <p>BLAST: aliSize=94 (resi) iden=93.07% (94/101) simi=93.07% (94/101)<br/> <b>GNFSQACYN</b>SAIQGSVLTSTCI<b>RTNGGYNTSSIDLNSV</b>IENVDGSLKW<b>OGSNFIETCRNTQLAGSSELAEECKTRAQQFVSTKINLDDHIAAIDGTLK</b>YE1<br/> <b>LKFSQTCYNSA</b>IQGSVLTSTC<b>ERTNGGYNTSSIDLNSV</b>IENVDGSLKW<b>OSPNIETCRNTQLAGSSELAEECKTRAQQFVSTKINLDDHIANIDGTLK</b>YE-</p> <p>Proposed: aliSize=99 (resi) RMSD=0.69 (Å)<br/> <b>GNFSQACYN</b>SAIQGSVLTSTCI<b>RTNGGYNTSSIDLNSV</b>IENVDGSLKW<b>OG-sNFIETCRNTQLAGSSELAEECKTRAQQFVSTKINLDDHIAAIDGTLK</b>YE1<br/> <b>LKFSQTCYNSA</b>IQGSVLTSTC<b>ERTNGGYNTSSIDLNSV</b>IENVDGSLKW<b>OSP-NFIETCRNTQLAGSSELAEECKTRAQQFVSTKINLDDHIANIDGTLK</b>YE-</p>       |

|     |                |   |       |                                                                                                                                                                                                                                                                                                                                                                                                                                                                                                                                                                                                                                                                                                                                                                                                                                                                                                                                                                                                                                                                                                                                                                                                                                                                                                                                                                                                                                                                                                                                                                                                                                                                                                                                                                                             |
|-----|----------------|---|-------|---------------------------------------------------------------------------------------------------------------------------------------------------------------------------------------------------------------------------------------------------------------------------------------------------------------------------------------------------------------------------------------------------------------------------------------------------------------------------------------------------------------------------------------------------------------------------------------------------------------------------------------------------------------------------------------------------------------------------------------------------------------------------------------------------------------------------------------------------------------------------------------------------------------------------------------------------------------------------------------------------------------------------------------------------------------------------------------------------------------------------------------------------------------------------------------------------------------------------------------------------------------------------------------------------------------------------------------------------------------------------------------------------------------------------------------------------------------------------------------------------------------------------------------------------------------------------------------------------------------------------------------------------------------------------------------------------------------------------------------------------------------------------------------------|
| 831 | 2z21B<br>(102) | N | 93.07 | <p>TM-align: aliSize=51 (resi) RMSD=1.27 (Å)<br/> -<b>GNFSQACYN</b>SAIQGSVLTSTCI<b>RTNGGYNTSSIDLNSV</b>IENV<b>DGSLKW</b><b>QGSNF</b>IETCRNTQLAGSSELA<b>AECKTRAQ</b>QFVSTKINLDDHIAAIDGTLKYEle-----<br/> 1<b>GKFSQTCYNSA</b>IQGSVLTSTC<b>ERTNGGYNTSSIDLNSV</b>IENV<b>DGSLKW</b><b>QPS</b>-----<b>nf</b>IETCRNTQLAGSSELA<b>AECKTRAQ</b>QFVSTKINLDDHIANIDGTLKYE</p> <p>SARST: aliSize=98 (resi) RMSD=15.81 (Å)<br/> g--<b>NFSQACYN</b>SAIQGSVLTSTCI<b>RTNGGYNTSSIDLNSV</b>IENV<b>DGSLKW</b><b>QGSNF</b>IETCRNTQLAGSSELA<b>AECKTRAQ</b>QFVSTKINLDDHIAAIDGTLKYEle<br/> -l<b>gKFSQTCYNSA</b>IQGSVLTSTC<b>ERTNGGYNTSSIDLNSV</b>IENV<b>DGSLKW</b><b>QPSNF</b>IETCRNTQLAGSSELA<b>AECKTRAQ</b>QFVSTKINLDDHIANIDGTLKYEe---</p> <p>BLAST: aliSize=95 (resi) iden=94.06% (95/101) simi=94.06% (95/101)<br/> -<b>GNFSQACYN</b>SAIQGSVLTSTCI<b>RTNGGYNTSSIDLNSV</b>IENV<b>DGSLKW</b><b>QGSNF</b>IETCRNTQLAGSSELA<b>AECKTRAQ</b>QFVSTKINLDDHIAAIDGTLKYEle<br/> 1<b>GKFSQTCYNSA</b>IQGSVLTSTC<b>ERTNGGYNTSSIDLNSV</b>IENV<b>DGSLKW</b><b>QPSNF</b>IETCRNTQLAGSSELA<b>AECKTRAQ</b>QFVSTKINLDDHIANIDGTLKYE---</p> <p>Proposed: aliSize=99 (resi) RMSD=0.74 (Å)<br/> -<b>GNFSQACYN</b>SAIQGSVLTSTCI<b>RTNGGYNTSSIDLNSV</b>IENV<b>DGSLKW</b><b>QGSNF</b>IETCRNTQLAGSSELA<b>AECKTRAQ</b>QFVSTKINLDDHIAAIDGTLKYEle<br/> 1<b>GKFSQTCYNSA</b>IQGSVLTSTC<b>ERTNGGYNTSSIDLNSV</b>IENV<b>DGSLKW</b><b>QPSNF</b>IETCRNTQLAGSSELA<b>AECKTRAQ</b>QFVSTKINLDDHIANIDGTLKYE---</p>                                                                                                                                                                                                                                                                                                                                             |
| 832 | 2z21B<br>(102) | N | 93.07 | <p>TM-align: aliSize=53 (resi) RMSD=2.02 (Å)<br/> gnfsqacynsaiqgsvlststcirtnggyntssidln-----svienvdgsikw-----<b>QGSNF</b>IETCRNTQLAGSSELA<b>AECKTRAQ</b>QFVSTKINLDDHIAAIDGTLKYEle<br/> -----lgkfsqtcynsaiqgsvlststcirtnggyntssidln-----vienvdgsikw<b>QPSNF</b>IETCRNTQLAGSSELA<b>AECKTRAQ</b>QFVSTKINLDDHIANIDGTLKYE---</p> <p>SARST: aliSize=98 (resi) RMSD=16.37 (Å)<br/> g--<b>NFSQACYN</b>SAIQGSVLTSTCI<b>RTNGGYNTSSIDLNSV</b>IENV<b>DGSLKW</b><b>QGSNF</b>IETCRNTQLAGSSELA<b>AECKTRAQ</b>QFVSTKINLDDHIAAIDGTLKYEle<br/> -l<b>gKFSQTCYNSA</b>IQGSVLTSTC<b>ERTNGGYNTSSIDLNSV</b>IENV<b>DGSLKW</b><b>QPSNF</b>IETCRNTQLAGSSELA<b>AECKTRAQ</b>QFVSTKINLDDHIANIDGTLKYEe---</p> <p>BLAST: aliSize=94 (resi) iden=93.07% (94/101) simi=93.07% (94/101)<br/> -<b>GNFSQACYN</b>SAIQGSVLTSTCI<b>RTNGGYNTSSIDLNSV</b>IENV<b>DGSLKW</b><b>QGSNF</b>IETCRNTQLAGSSELA<b>AECKTRAQ</b>QFVSTKINLDDHIAAIDGTLKYEle<br/> 1<b>GKFSQTCYNSA</b>IQGSVLTSTC<b>ERTNGGYNTSSIDLNSV</b>IENV<b>DGSLKW</b><b>QPSNF</b>IETCRNTQLAGSSELA<b>AECKTRAQ</b>QFVSTKINLDDHIANIDGTLKYE---</p> <p>Proposed: aliSize=99 (resi) RMSD=0.65 (Å)<br/> -<b>GNFSQACYN</b>SAIQGSVLTSTCI<b>RTNGGYNTSSIDLNSV</b>IENV<b>DGSLKW</b><b>QGSNF</b>IETCRNTQLAGSSELA<b>AECKTRAQ</b>QFVSTKINLDDHIAAIDGTLKYEle<br/> 1<b>GKFSQTCYNSA</b>IQGSVLTSTC<b>ERTNGGYNTSSIDLNSV</b>IENV<b>DGSLKW</b><b>QPSNF</b>IETCRNTQLAGSSELA<b>AECKTRAQ</b>QFVSTKINLDDHIANIDGTLKYE---</p>                                                                                                                                                                                                                                                                                                                                                                                 |
| 833 | 2jzkA<br>(103) | N | 25.74 | <p>TM-align: aliSize=50 (resi) RMSD=1.19 (Å)<br/> -----MSYADSSR<b>NAVL</b>Tng<b>RT</b>RA<b>ECRNAD</b>GN<b>WV</b>SE<b>LDL</b>DT<b>CG</b>NP<b>CF</b>LG<b>GMQNF</b>SH<b>SSEDI</b>KL<b>eEG</b>GR<b>K</b>TCR<b>pKT</b>VD<b>GGFRERQ</b>g<b>IDL</b>-<b>NR</b>IQ<b>VN</b>GR<b>V</b>FQ<br/> lgkfsqtcynsaiqgsvlststcirtnggyntssidlnsvienvdgsikw<b>QPSNF</b>IETCRNTQLAGS-<b>SELA</b>AE<b>CKTRAQ</b>QF<b>VSTK</b>IN<b>LDDH</b>IA<b>IIDGTL</b>KYE-----</p> <p>SARST: aliSize=96 (resi) RMSD=15.35 (Å)<br/> ms---<b>YADSSR</b><b>NAVL</b>Tng<b>RT</b>RA<b>ECRNAD</b>GN<b>WV</b>SE<b>LDL</b>DT<b>CG</b>NP<b>CF</b>LG<b>GMQNF</b>SH<b>SSEDI</b>KL<b>eEG</b>GR<b>K</b>TCR<b>pKT</b>VD<b>GGFRERQ</b>g<b>IDL</b>-<b>NR</b>IQ<b>VN</b>GR<b>V</b>FQ<br/> --l<b>gKFSQTCYNSA</b>IQGSVLTSTC<b>ERTNGGYNTSSIDLNSV</b>IENV<b>DGSLKW</b><b>QPSNF</b>IETCRNTQLAGS-<b>SELA</b>AE<b>CKTRAQ</b>QF<b>VSTK</b>IN<b>LDDH</b>IA<b>IIDGTL</b>KYE-</p> <p>BLAST: aliSize=45 (resi) iden=26.73% (27/101) simi=44.55% (45/101)<br/> msyadssrnavltngrtraecrnadgnwvselldtctgpnfcflg<b>GMQNF</b>SH<b>SSEDI</b>KL<b>eEG</b>GR<b>K</b>TCR<b>pKT</b>VD<b>GGFRERQ</b>g<b>IDL</b>-<b>NR</b>IQ<b>VN</b>GR<b>V</b>FQ<br/> -----lgkfsqtcynsaiqgsvlststcirtnggyntssidlnsvienvdgsikw<b>QPSNF</b>IETCRNTQLAGS-<b>SELA</b>AE<b>CKTRAQ</b>QF<b>VSTK</b>IN<b>LDDH</b>IA<b>IIDGTL</b>KYE</p> <p>Proposed: aliSize=95 (resi) RMSD=1.43 (Å)<br/> -MSYADSSR<b>NAVL</b>Tng<b>RT</b>RA<b>ECRNAD</b>GN<b>WV</b>SE<b>LDL</b>DT<b>CG</b>NP<b>CF</b>LG<b>GMQNF</b>SH<b>SSEDI</b>KL<b>eEG</b>GR<b>K</b>TCR<b>pKT</b>VD<b>GGFRERQ</b>g<b>IDL</b>-<b>NR</b>IQ<b>VN</b>GR<b>V</b>FQ<br/> 1<b>GKFSQTCYNSA</b>IQGSVLTSTC<b>ERTNGGYNTSSIDLNSV</b>IENV<b>DGSLKW</b><b>QPSNF</b>IETCRNTQLAGS-<b>SELA</b>AE<b>CKTRAQ</b>QF<b>VSTK</b>IN<b>LDDH</b>IA<b>IIDGTL</b>KYE</p> |

|     |                |   |       |                                                                                                                                                                                                                                                                                                                                                                                                                                                                                                                                                                                                                                                                                                                                                                                                                                                                                                                                                                                                                                                                                                                                                                                                          |
|-----|----------------|---|-------|----------------------------------------------------------------------------------------------------------------------------------------------------------------------------------------------------------------------------------------------------------------------------------------------------------------------------------------------------------------------------------------------------------------------------------------------------------------------------------------------------------------------------------------------------------------------------------------------------------------------------------------------------------------------------------------------------------------------------------------------------------------------------------------------------------------------------------------------------------------------------------------------------------------------------------------------------------------------------------------------------------------------------------------------------------------------------------------------------------------------------------------------------------------------------------------------------------|
| 834 | 2rdkB<br>(99)  | N | 93.94 | <p>TM-align: aliSize=55 (resi) RMSD=2.26 (Å)<br/> nfsqacynsaiqgsvlststcirtnggyntssidl-----NSV ienvdgs lkw-----OGSNF IETCRNTQLAGSSELAAECKTRAQQFVSTKINLDDHIAAIDGTLKYE<br/> -----lgkfsqt cynsaiqgsvlststcirtnggyntssidlNSV-----ienvdgs lkwOPSNF IETCRNTQLAGSSELAAECKTRAQQFVSTKINLDDHIANIDGTLKYE</p> <p>SARST: aliSize=97 (resi) RMSD=15.70 (Å)<br/> n---FSQACYNsAIQGSVLTSTCI RTNGGYNTSSIDLNSV IENV DGLK WOGSNF IETCRNTQLAGSSELAAECKTRAQQFVSTKINLDDHIAAIDGTLK Y-e<br/> -lgkFSQTCYNsAIQGSVLTSTC ER TNGGYNTSSIDLNSV IENV DGLK WOPSNF IETCRNTQLAGSSELAAECKTRAQQFVSTKINLDDHIANIDGTLK Y-e</p> <p>BLAST: aliSize=94 (resi) iden=94.95% (94/99) simi=94.95% (94/99)<br/> n---FSQACYNsAIQGSVLTSTCI RTNGGYNTSSIDLNSV IENV DGLK WOGSNF IETCRNTQLAGSSELAAECKTRAQQFVSTKINLDDHIAAIDGTLK Y-e<br/> -lgkFSQTCYNsAIQGSVLTSTC ER TNGGYNTSSIDLNSV IENV DGLK WOPSNF IETCRNTQLAGSSELAAECKTRAQQFVSTKINLDDHIANIDGTLK Y-e</p> <p>Proposed: aliSize=98 (resi) RMSD=0.73 (Å)<br/> --NFSQACYNsAIQGSVLTSTCI RTNGGYNTSSIDLNSV IENV DGLK WOG-sNF IETCRNTQLAGSSELAAECKTRAQQFVSTKINLDDHIAAIDGTLK Y-e<br/> lgkFSQTCYNsAIQGSVLTSTC ER TNGGYNTSSIDLNSV IENV DGLK WOPs-NF IETCRNTQLAGSSELAAECKTRAQQFVSTKINLDDHIANIDGTLK Y-e</p>                  |
| 835 | 2rdkB<br>(99)  | N | 93.94 | <p>TM-align: aliSize=53 (resi) RMSD=2.02 (Å)<br/> nfsqacynsaiqgsvlststcirtnggyntssidln-----vienvdgs lkw-----OGSNF IETCRNTQLAGSSELAAECKTRAQQFVSTKINLDDHIAAIDGTLK Y-e<br/> -----lgkfsqt cynsaiqgsvlststcirtnggyntssidlnS-----vienvdgs lkwOPSNF IETCRNTQLAGSSELAAECKTRAQQFVSTKINLDDHIANIDGTLK Y-e</p> <p>SARST: aliSize=97 (resi) RMSD=16.28 (Å)<br/> n---FSQACYNsAIQGSVLTSTCI RTNGGYNTSSIDLNSV IENV DGLK WOGSNF IETCRNTQLAGSSELAAECKTRAQQFVSTKINLDDHIAAIDGTLK Y-e<br/> -lgkFSQTCYNsAIQGSVLTSTC ER TNGGYNTSSIDLNSV IENV DGLK WOPSNF IETCRNTQLAGSSELAAECKTRAQQFVSTKINLDDHIANIDGTLK Y-e</p> <p>BLAST: aliSize=93 (resi) iden=93.94% (93/99) simi=93.94% (93/99)<br/> n---FSQACYNsAIQGSVLTSTCI RTNGGYNTSSIDLNSV IENV DGLK WOGSNF IETCRNTQLAGSSELAAECKTRAQQFVSTKINLDDHIAAIDGTLK Y-e<br/> -lgkFSQTCYNsAIQGSVLTSTC ER TNGGYNTSSIDLNSV IENV DGLK WOPSNF IETCRNTQLAGSSELAAECKTRAQQFVSTKINLDDHIANIDGTLK Y-e</p> <p>Proposed: aliSize=98 (resi) RMSD=0.64 (Å)<br/> --NFSQACYNsAIQGSVLTSTCI RTNGGYNTSSIDLNSV IENV DGLK WOG-sNF IETCRNTQLAGSSELAAECKTRAQQFVSTKINLDDHIAAIDGTLK Y-e<br/> lgkFSQTCYNsAIQGSVLTSTC ER TNGGYNTSSIDLNSV IENV DGLK WOPs-NF IETCRNTQLAGSSELAAECKTRAQQFVSTKINLDDHIANIDGTLK Y-e</p>                |
| 836 | 2pysB<br>(103) | N | 93.07 | <p>TM-align: aliSize=51 (resi) RMSD=1.29 (Å)<br/> - NFSQACYNsAIQGSVLTSTCI RTNGGYNTSSIDLNSV IENV DGLK WOGSNfi ietcrintqlagsselaaecktraqqfvstkinlddhiaaidgtlk yele h-----<br/> lKFSQTCYNsAIQGSVLTSTC ER TNGGYNTSSIDLNSV IENV DGLK WOPs-----ni ietcrintqlagsselaaecktraqqfvstkinlddhianidgtlk ye</p> <p>SARST: aliSize=98 (resi) RMSD=15.82 (Å)<br/> g--NFSQACYNsAIQGSVLTSTCI RTNGGYNTSSIDLNSV IENV DGLK WOGSNF IETCRNTQLAGSSELAAECKTRAQQFVSTKINLDDHIAAIDGTLK Y-ele h<br/> -lgkFSQTCYNsAIQGSVLTSTC ER TNGGYNTSSIDLNSV IENV DGLK WOPSNF IETCRNTQLAGSSELAAECKTRAQQFVSTKINLDDHIANIDGTLK Y-e----</p> <p>BLAST: aliSize=95 (resi) iden=94.06% (95/101) simi=94.06% (95/101)<br/> - NFSQACYNsAIQGSVLTSTCI RTNGGYNTSSIDLNSV IENV DGLK WOGSNF IETCRNTQLAGSSELAAECKTRAQQFVSTKINLDDHIAAIDGTLK Y-le h<br/> lKFSQTCYNsAIQGSVLTSTC ER TNGGYNTSSIDLNSV IENV DGLK WOPSNF IETCRNTQLAGSSELAAECKTRAQQFVSTKINLDDHIANIDGTLK Y----</p> <p>Proposed: aliSize=99 (resi) RMSD=0.73 (Å)<br/> - NFSQACYNsAIQGSVLTSTCI RTNGGYNTSSIDLNSV IENV DGLK WOG-sNF IETCRNTQLAGSSELAAECKTRAQQFVSTKINLDDHIAAIDGTLK Y-le h<br/> lKFSQTCYNsAIQGSVLTSTC ER TNGGYNTSSIDLNSV IENV DGLK WOPs-NF IETCRNTQLAGSSELAAECKTRAQQFVSTKINLDDHIANIDGTLK Y----</p> |
|     | 115eA<br>(101) |   |       |                                                                                                                                                                                                                                                                                                                                                                                                                                                                                                                                                                                                                                                                                                                                                                                                                                                                                                                                                                                                                                                                                                                                                                                                          |

|     |                                                     |   |       |                                                                                                                                                                                                                                                                                                                                                                                                                                                                                                                                                                                                                                                                                                                                                                                                                                                                                                                                                                                                                                                                                                                                                                                                                                                                                                                                                                                                                                                                                   |
|-----|-----------------------------------------------------|---|-------|-----------------------------------------------------------------------------------------------------------------------------------------------------------------------------------------------------------------------------------------------------------------------------------------------------------------------------------------------------------------------------------------------------------------------------------------------------------------------------------------------------------------------------------------------------------------------------------------------------------------------------------------------------------------------------------------------------------------------------------------------------------------------------------------------------------------------------------------------------------------------------------------------------------------------------------------------------------------------------------------------------------------------------------------------------------------------------------------------------------------------------------------------------------------------------------------------------------------------------------------------------------------------------------------------------------------------------------------------------------------------------------------------------------------------------------------------------------------------------------|
| 837 | <p>2pysB<br/>(103)</p> <hr/> <p>1lomA<br/>(101)</p> | N | 93.07 | <p><b>TM-align:</b> aliSize=53 (resi) RMSD=2.00 (Å)<br/> gnfsqacynsaiqgsvltstcirtnggyntssidln-----svienvdgs1kw-----OGSNFIETCRNTQLAGSSELAEECKTRAQQFVSTKINLDDHIAADGTLKYEleh<br/> -----lgkfsqtcynsaiqgsvltstcirtnggyntssidln-----vienvdgs1kw-----OSPFIETCRNTQLAGSSELAEECKTRAQQFVSTKINLDDHIANIDGTLKYE----</p> <p><b>SARST:</b> aliSize=98 (resi) RMSD=16.39 (Å)<br/> g--NFSQACYNsAIQGSVLTSTCI RTNGGYNTSSIDLNSVIENVdGSLKwOGSNFIETCRNTQLAGSSELAEECKTRAQQFVSTKINLDDHIAADGTLKYE-leh<br/> -lgKFSQTCYNsAIQGSVLTSTCI RTNGGYNTSSIDLNSVIENVdGSLKwOSPFIETCRNTQLAGSSELAEECKTRAQQFVSTKINLDDHIANIDGTLKYEe----</p> <p><b>BLAST:</b> aliSize=94 (resi) iden=93.07% (94/101) simi=93.07% (94/101)<br/> -NFSQACYNsAIQGSVLTSTCI RTNGGYNTSSIDLNSVIENVdGSLKwOGSNFIETCRNTQLAGSSELAEECKTRAQQFVSTKINLDDHIAADGTLKYEleh<br/> -lgKFSQTCYNsAIQGSVLTSTCI RTNGGYNTSSIDLNSVIENVdGSLKwOSPFIETCRNTQLAGSSELAEECKTRAQQFVSTKINLDDHIANIDGTLKYE----</p> <p><b>Proposed:</b> aliSize=99 (resi) RMSD=0.63 (Å)<br/> -NFSQACYNsAIQGSVLTSTCI RTNGGYNTSSIDLNSVIENVdGSLKwOG-sNFIETCRNTQLAGSSELAEECKTRAQQFVSTKINLDDHIAADGTLKYEleh<br/> -lgKFSQTCYNsAIQGSVLTSTCI RTNGGYNTSSIDLNSVIENVdGSLKwOSP-nFIETCRNTQLAGSSELAEECKTRAQQFVSTKINLDDHIANIDGTLKYE----</p>                                                                                                                                                                                                                                                                            |
| 838 | <p>2vq8A<br/>(128)</p> <hr/> <p>1h8xA<br/>(125)</p> | N | 25.60 | <p><b>TM-align:</b> aliSize=93 (resi) RMSD=1.91 (Å)<br/> hmqpehvkyknflnqhvqgdm-----SV--Q-RCNSEIGpnNRKI lsgtDNGCKPVNTHILANKRLIKTVCGraGSPQG-----MVRSNQFPVVKVILN-NGERhPYEYRGTSTRSTRYTLVKCEE--GWVPHYHEDevn--<br/> -----kesaaakferqhmdsgnSPSSsTYCNQMMRRRNM--RRNM-----QGRCKPVNTHVHEPLVDVQNVCFQEKVTckngqgCYKSNSSMHITDRLTnGSRYP-NCAVRTSOKERHIIVACEGspYVPVHFDASe----</p> <p><b>SARST:</b> aliSize=109 (resi) RMSD=13.18 (Å)<br/> hmqpehvke---RYKNFLNQHVGPDM--VORCNSEIGPNNRKI lsgtdngCKPVNTHILANKRLIKTVCGRAGSPQG----MVRSNQFPVVKVILNNGERHPYCEYRGTSTRSTRYTLVKCEE--WPHY-----hedevn<br/> -----kesAAAKFERQHMDSGNSPSSSTYCNQMMRRRNM--RRNM-----QGRCKPVNTHVHEPLVDVQNVCFQEKVTCKngqgCYKSNSSMHITDRLTnGSRYPNCAVRTSOKERHIIVACEGSPYVPVHFdasve-----</p> <p><b>BLAST:</b> aliSize=55 (resi) iden=31.20% (39/125) simi=44.00% (55/125)<br/> hmqpehvkykn-----FLNQHV---GPDMSVORCNSEIGPNNRKI lsgtDNGCKPVNTHILANKRLIKTVCGR----AGSPQGMVRSNQFPVVKVILNNGERHPYCEYRGTSTRSTRYTLVKCEE--WPHY-----hedevn<br/> -----kesaaakFERQHMDsgnSPSSSTYCNQMMRRRNM-----QGRCKPVNTHVHEPLVDVQNVCFQekvtCKNGGNCYKSNSSMHITDRLTnGSRYPNCAVRTSOKERHIIVACEGSPYVPVHFdasve-----</p> <p><b>Proposed:</b> aliSize=109 (resi) RMSD=1.71 (Å)<br/> hmqpehv-KERYKNFLNQHVGPDMsVQ---RCNSEIGpnNRKI lsgtDNGCKPVNTHILANKRLIKTVCGraGSPQG-----MVRSNQFPVVKVILN-NGERhPYEYRGTSTRSTRYTLVKCEE--GWVPHYHED--evn<br/> -----kESAAAKFERQHMDSGNSPSSsTYCNQMMRRRNM--RRNM-----QGRCKPVNTHVHEPLVDVQNVCFQEKVTckngqgCYKSNSSMHITDRLTnGSRYP-NCAVRTSOKERHIIVACEGspYVPVHFDASeve---</p> |
| 839 | <p>1pu3A<br/>(105)</p> <hr/> <p>1h8xA<br/>(125)</p> | N | 21.90 | <p><b>TM-align:</b> aliSize=87 (resi) RMSD=2.61 (Å)<br/> mqdwltfqkhi tnt-----R--DVDNDILSTNLfH---CKDKNTFIYSRPEPKAIKKG-Iia-----SKNVLTTSEFYLSDCNVTSRP----KYLKSTNKFCVTCEN--QAPVHFGVGSsc<br/> -----kesaaakferqhmdsgnspSSsTYCNQMMRRRNMtqgrCKPVNTHVHEPLVDVQNVCFQEK--vtckngqgCYKSNSSMHITDRLTnGSRYPNCAVRTSOKERHIIVACEGspYVPVHFDASeve-</p> <p><b>SARST:</b> aliSize=82 (resi) RMSD=3.46 (Å)<br/> mqdwltfqkhi tntrdvd-----CDNILSTNLfHCKDKNTFIYSRPEPKAIKGI IAS-----KNVLTTSEFYLSDCNVTsrPC-----KYLKSTNKFCVTCEN--QAPVHFGVGS-sc<br/> -----kesaaakferqhmdsgnspSSsTYCNQMMRRRNMtqgrCKPVNTHVHEPLVDVQNVCFQEKVTckngqgCYKSNSSMHITDRLTnGSRYPNCAVRTSOKERHIIVACEGspYVPVHFDASeve--</p> <p><b>BLAST:</b> aliSize=38 (resi) iden=23.81% (25/105) simi=36.19% (38/105)<br/> mqdwltfqkhi tntrdvdcnildstnlfh-----CKDKNTFIYSRPEPKAIK-KGI IASKN-----VLTTSSEFYLSDCNVT--SH--P--KYLKSTNKFCVTCENQ--APVH-----vvgvsc<br/> -----kesaaakferqhmdsgnspSSsTYCNQMMRRRNMtqgrCKPVNTHVHEPLVDVQNVCFQEKVTCKngqgncYKSNSSMHITDRLTnGSRYPNCAVRTSOKERHIIVACEGspYVPVHFdasve-----</p> <p><b>Proposed:</b> aliSize=97 (resi) RMSD=1.58 (Å)<br/> -MQDWLTFQKHIITN-TRD-----VDNDILST-nLFH---CKDKNTFIYSRPEPKAIK-----giaSKNVLTTSEFYLSDCNVTSRP----KYLKSTNKFCVTCEN--QAPVHFGVGS-sc<br/> kESAAAKFERQHMDSGNSPSSsTYCNQMMRRR-NMTqgrCKPVNTHVHEPLVDVQNVCFQekvtckngq----GNCYKSNSSMHITDRLTnGSRYPNCAVRTSOKERHIIVACEGspYVPVHFDASeve--</p>                                                                                                                       |



|     |                                                     |            |                                                                                                                                                                                                                                                                                                                                                                                                                                                                                                                                                                                                                                                                                                                                                                                                                                                                                                                                                                                                                                                                                                                                                                                                                                                                                                                                                                                                                 |
|-----|-----------------------------------------------------|------------|-----------------------------------------------------------------------------------------------------------------------------------------------------------------------------------------------------------------------------------------------------------------------------------------------------------------------------------------------------------------------------------------------------------------------------------------------------------------------------------------------------------------------------------------------------------------------------------------------------------------------------------------------------------------------------------------------------------------------------------------------------------------------------------------------------------------------------------------------------------------------------------------------------------------------------------------------------------------------------------------------------------------------------------------------------------------------------------------------------------------------------------------------------------------------------------------------------------------------------------------------------------------------------------------------------------------------------------------------------------------------------------------------------------------|
| 840 | <p>1un4A<br/>(119)</p> <hr/> <p>1h8xA<br/>(125)</p> | N<br>34.45 | <p><b>TM-align:</b> aliSize=98 (resi) RMSD=1.99 (Å)<br/> nsrythflrqhydakpq-----GR-DDRYCESIMRRRGLTS-PCKDINTFIHGKRSIKATCEnknGNPHRE----NLRISSSFQVIAKIHGGSPWPPQYRATAGFRNVVACEN--GLPVHLQSIfr<br/> -----kesaaakferqhmdsgnsPSsSSTYCNQMMRRRNMTQGRCKPVNTFVHEPLVDVQNVCF---QEKVTCKngqgCYKSNSSMHIIDRLTNGSRYPNCAVRTSOKERHIIVACEGspYVPVHFDA-SVE-</p> <p><b>SARST:</b> aliSize=105 (resi) RMSD=14.76 (Å)<br/> ns---RYTHFLROHYDAKP---QGRddrYCESIMRRRGLTS-PCKDINTFIHGKRSIKATC-----ENKNGNPHrenLRISSSFQVIAKIHGGSPWPPQYRATAGFRNVVACEN--GLPVHL----dqsifr<br/> --kesAAAKFERQHMDSGNSpssSST---YCNQMMRRRNMTQGRCKPVNTFVHEPLVDVQNVCFqekvtCKNGQGN---CYKSNSSMHIIDRLTNGSRYPNCAVRTSOKERHIIVACEGspYVPVHFdasve-----</p> <p><b>BLAST:</b> aliSize=66 (resi) iden=37.82% (45/119) simi=55.46% (66/119)<br/> nsryth-----FLROHYDA--KPOGrDDRICESIMRRRGLTSP-CKDINTFIHG---NKRSL----KATCENKNGNPHREnriskSSSFQVIAKIHGGSPWPPQYRATAGFRNVVACEN--LPVHLQSI-fr<br/> -----kesaaakFERQHMDSGNSpSS-SSTYCNQMMRRRNMTQGRCKPVNTFVHEPlVDVQNVcfqekvtCKNGQGCYKSN-----SSMHIIDRLTNGSRYPNCAVRTSOKERHIIVACEGspYVPVHFDA-Sve--</p> <p><b>Proposed:</b> aliSize=110 (resi) RMSD=1.48 (Å)<br/> n--SRYTHFLROHYDAKPOGR--ddRYCESIMRRRGLTS-PCKDINTFIHGKRSIKATCEnknGNPHRE----NLRISSSFQVIAKIHGGSPWPPQYRATAGFRNVVACEN--GLPVHLQsI--fr<br/> -keSAAAKFERQHMDSGNSpSSsS--TYCNQMMRRRNMTQGRCKPVNTFVHEPLVDVQNVCF---QEKVTCKngqgCYKSNSSMHIIDRLTNGSRYPNCAVRTSOKERHIIVACEGspYVPVHFDA-Sve--</p>         |
| 841 | <p>1rmfA<br/>(120)</p> <hr/> <p>1h8xA<br/>(125)</p> | N<br>41.67 | <p><b>TM-align:</b> aliSize=100 (resi) RMSD=1.66 (Å)<br/> mqdgmqrflrqhvhpet-----GG-SDRYCNLMQRKMTLYHCKRFNTFIHEDIWNIRSLSTTNIQCK-NGKMNCHEG--VVKVTDCRDIGSSRAFPNCRRAIASTRRVVIACEGNFQVPVHFDG---<br/> -----kesaaakferqhmdsgnsPSsSSTYCNQMMRRRNMTQGRCKPVNTFVHEPLVDVQNVCFQEKVTCKNGQGN-CYKSNSSMHIIDRLTNGSRYPNCAVRTSOKERHIIVACEGspYVPVHFDA-Sve</p> <p><b>SARST:</b> aliSize=112 (resi) RMSD=13.01 (Å)<br/> mqdgm---MYQRFLROHVHPPEtggSDR---TCNLMQRKMTLYHCKRFNTFIHEDIWNIRSLSTTNIQCKNGKMNCHEG--GVVKVTDCRDIGSSRAFPNCRRAIASTRRVVIACEGNFQVPVHFDG---g<br/> ---kesAAAKFERQHMDSGNSpSSsSSTYCNQMMRRRNMTQGRCKPVNTFVHEPLVDVQNVCFQEKVTCKNGQGCYKSNSSMHIIDRLTNGSRYPNCAVRTSOKERHIIVACEGspYVPVHFdasve-----</p> <p><b>BLAST:</b> aliSize=73 (resi) iden=43.33% (52/120) simi=60.83% (73/120)<br/> mqdgmqr-----RFLROHVHPPEETGGSDRYCNLMQRKMTLYHCKRFNTFIHEDIWNIRSLSTTNIQCKNGKMNCHEG--GVVKVTDCRDIGSSRAFPNCRRAIASTRRVVIACEGNFQVPVHFDG---g<br/> -----kesaaakFERQHMDSGNSpSSSSTYCNQMMRRRNMTQGRCKPVNTFVHEPLVDVQNVCFQEKVTCKNGQGCYKSNSSMHIIDRLTNGSRYPNCAVRTSOKERHIIVACEGspYVPVHFdasve-----</p> <p><b>Proposed:</b> aliSize=115 (resi) RMSD=1.37 (Å)<br/> mqd--GMYQRFLROHVHPPEETGG--SdRYCNLMQRKMTLYHCKRFNTFIHEDIWNIRSLSTTNIQCK-NGKMNCHEG--VVKVTDCRDIGSSRAFPNCRRAIASTRRVVIACEGNFQVPVHFDG---<br/> ---keSAAAKFERQHMDSGNSpSSsS-TYCNQMMRRRNMTQGRCKPVNTFVHEPLVDVQNVCFQEKVTCKNGQGN-CYKSNSSMHIIDRLTNGSRYPNCAVRTSOKERHIIVACEGspYVPVHFDA-Sve</p>                     |
| 842 | <p>2j4tA<br/>(119)</p> <hr/> <p>1h8xA<br/>(125)</p> | N<br>36.13 | <p><b>TM-align:</b> aliSize=98 (resi) RMSD=1.75 (Å)<br/> neryekflrqhydakpq-----GR-DDRYCESMMKERKLTSP-CKDINTFIHGTTKNIRAITGkkGSPYG----ENFRISNSPFQITITHSRGSPPWPCGYRAFKDFRYIVIACED--GWPVHFD-EsFIsP<br/> -----kesaaakferqhmdsgnsPSsSSTYCNQMMRRRNMTQGRCKPVNTFVHEPLVDVQNVCF---QEKVTCKngqG-CYKSNSSMHIIDRLTNGSRYPNCAVRTSOKERHIIVACEGspYVPVHFDA-SV-E</p> <p><b>SARST:</b> aliSize=104 (resi) RMSD=13.70 (Å)<br/> ne---RYEKFLROHYDAKPOGrddr---YCESMMKERKLTSP-CKDINTFIHGTTKNIRAIT-----GKKGSPYgenFRISNSPFQITITHSRGSPPWPCGYRAFKDFRYIVIACED--GWPVHF----desfisp<br/> --kesAAAKFERQHMDSGNS--PSsSSTYCNQMMRRRNMTQGRCKPVNTFVHEPLVDVQNVCFqekvtCKNGQGN---CYKSNSSMHIIDRLTNGSRYPNCAVRTSOKERHIIVACEGspYVPVHFdasve-----</p> <p><b>BLAST:</b> aliSize=62 (resi) iden=39.50% (47/119) simi=52.10% (62/119)<br/> nerye-----KFLROHYDA--KPOGrDDRICESMMKERKLTSP-CKDINTFIHGTTKNIRAIT--GKKGSPYgenFRISNSPFQITITHSRGSPPWPCGYRAFKDFRYIVIACEDG--WVPVHFD--fisp<br/> -----kesaaakFERQHMDSGNSpSS-SSTYCNQMMRRRNMTQGRCKPVNTFVHEPLVDVQNVCFqekvtCKNGQGCYKSNSSMHIIDRLTNGSRYPNCAVRTSOKERHIIVACEGspYVPVHFDA-Sve----</p> <p><b>Proposed:</b> aliSize=113 (resi) RMSD=1.56 (Å)<br/> n--ERYEKFLROHYDAKPO--GRDdrYCESMMKERKLTSP-CKDINTFIHGTTKNIRAITGkkGSPYG----ENFRISNSPFQITITHSRGSPPWPCGYRAFKDFRYIVIACED--GWPVHFD-EsFIsP<br/> -keSAAAKFERQHMDSGNSpSSS-TYCNQMMRRRNMTQGRCKPVNTFVHEPLVDVQNVCF---QEKVTCKngqG-CYKSNSSMHIIDRLTNGSRYPNCAVRTSOKERHIIVACEGspYVPVHFDA-SV-E</p> |

|     |                                                     |   |       |                                                                                                                                                                                                                                                                                                                                                                                                                                                                                                                                                                                                                                                                                                                                                                                                                                                                                                                                                                                                                                                                                                                                                                                                                                                                                                                                                                                                                                                       |
|-----|-----------------------------------------------------|---|-------|-------------------------------------------------------------------------------------------------------------------------------------------------------------------------------------------------------------------------------------------------------------------------------------------------------------------------------------------------------------------------------------------------------------------------------------------------------------------------------------------------------------------------------------------------------------------------------------------------------------------------------------------------------------------------------------------------------------------------------------------------------------------------------------------------------------------------------------------------------------------------------------------------------------------------------------------------------------------------------------------------------------------------------------------------------------------------------------------------------------------------------------------------------------------------------------------------------------------------------------------------------------------------------------------------------------------------------------------------------------------------------------------------------------------------------------------------------|
| 843 | <p>1bleA<br/>(123)</p> <hr/> <p>1h8xA<br/>(125)</p> | N | 32.52 | <p><b>TM-align:</b> aliSize=98 (resi) RMSD=1.99 (Å)<br/> qdnsrythfl tqhyda kpg-----GR-DDRYCESIMRRRGLTSP-PODINTFIHGKRSIKATC-EnknGNPHRE----NLRI SKSSFQVITTKLHGGSPPWPPQYRATAGFRNvvVACEN--GLPVHLDQsIFrRp<br/> -----kesaaakferqhmdsgnsPSsSSTYCNQMMRRRNMTQGRCKPVNTFVHEPLVDVQNVCF---QEKVTCKngqgCYKSNSSMHITDRLTNGSRYPNCAVRTSOKERHIIVACEGspYVPVHFDA-SV-E-</p> <p><b>SARST:</b> aliSize=105 (resi) RMSD=13.80 (Å)<br/> qdns---RYTHLTOHYDAKP---QGRddrYCESIMRRRGLTSP-PODINTFIHGKRSIKATC-----ENKNGNPHrenLRI SKSSFQVITTKLHGGSPPWPPQYRATAGFRNvvVACEN--GLPVHL-----dqsi frrp<br/> ---kesAAAKFERQHMDSGNSpsSST---YCNQMMRRRNMTQGRCKPVNTFVHEPLVDVQNVCFqekvtCKNGOGN---CYKSNSSMHITDRLTNGSRYPNCAVRTSOKERHIIVACEGspYVPVHFdasve-----</p> <p><b>BLAST:</b> aliSize=66 (resi) iden=35.77% (44/123) simi=53.66% (66/123)<br/> qdnsryth-----LTOHYDA--KPGQfDDRYCESIMRRRGLTSP-PODINTFIHG---NKRSI-----KAITENKNGNPHRENlrisKSSFQVITTKLHGGSPPWPPQYRATAGFRNvvVACENGL--LPVHLQSI-frrp<br/> -----kesaaakFERQHMDSGNSpSS-SSTYCNQMMRRRNMTQGRCKPVNTFVHEplvDVQNVCFqekvtCKNGOGNCKYSN-----SSMHITDRLTNGSRYPNCAVRTSOKERHIIVACEGspYVPVHFASve----</p> <p><b>Proposed:</b> aliSize=112 (resi) RMSD=1.63 (Å)<br/> QdNSRYTHLTOHYDAKPGQR---ddRYCESIMRRRGLTSP-PODINTFIHGKRSIKATC-EnknGNPHRE----NLRI SKSSFQVITTKLHGGSPPWPPQYRATAGFRNvvVACEN--GLPVHLDQsI--frrp<br/> K-ESAAAKFERQHMDSGNSpSSsSs--TYCNQMMRRRNMTQGRCKPVNTFVHEPLVDVQNVCF---QEKVTCKngqgCYKSNSSMHITDRLTNGSRYPNCAVRTSOKERHIIVACEGspYVPVHFDA-Sve----</p> |
| 844 | <p>2hkyA<br/>(129)</p> <hr/> <p>1h8xA<br/>(125)</p> | N | 33.60 | <p><b>TM-align:</b> aliSize=95 (resi) RMSD=1.94 (Å)<br/> mkpkgmtssqwFkiqhmqpsp-----QACNSANK--NINKhtKRCKDLNTHLHEPFSSVAATCQTPKIAQ---KngDkNCHQSHGVPVSLTMCKLT-SGKYPNCRKKEKRONKSYVVACKPPqkksqqFHLVPVHLDRVL-<br/> -----kesaaakferqhmdsgnspsSSsTYCNQMMRRRNMTQGRCKPVNTFVHEPLVDVQNVCFQEKVTCKngQ--G-NCYKSNSSMHITDRLTNGSRYPNCAVRTSOKERHIIVACEGSPYVPVHFASVe</p> <p><b>SARST:</b> aliSize=114 (resi) RMSD=14.12 (Å)<br/> mkpkg-MTSSQWFKIQHMQPSPQA-CNS---AMKNI NKHTRCKDLNTHLHEPFSSVAATCQTPKIAQ---KngDkNCHQSHGVPVSLTMCKLTSGKYPNCRKKEKRONKSYVVACKPPqkksqqFHLVPVHLDRV--1<br/> ----kESAAAKFERQHMDSGNSpSSsTYCNQMMRRRNMTQGRckpvNTEFVHEPLVDVQNVCFQEKVTCKNGOGNCKYSNSSMHITDRLTNGSRYPNCAVRTSOKERHIIVACE-----GSPYVPVHFASve-</p> <p><b>BLAST:</b> aliSize=68 (resi) iden=37.60% (47/125) simi=54.40% (68/125)<br/> mkpkgmtssqw-----FKIQHMQP--SPOA-----NSANKNI NKHTRCKDLNTHLHEPFSSVAATCQTPKIAQ---KngDkNCHQSHGVPVSLTMCKLTSGKYPNCRKKEKRONKSYVVACKPPqkksqqFHLVPVHLDRV--1<br/> -----kesaaakFERQHMDSGNSpSSsTYCNQMMRRRNMTQGRCKPVNTFVHEPLVDVQNVCFQEKVTCKNGOGNCKYSNSSMHITDRLTNGSRYPNCAVRTSOKERHIIVACE-----EGSPYVPVHFASve---</p> <p><b>Proposed:</b> aliSize=111 (resi) RMSD=1.78 (Å)<br/> mkpkgMTSSQWFKIQHMQPSPQ-----ACNSANK--NINKhtKRCKDLNTHLHEPFSSVAATCQTPKIAQ---KngDkNCHQSHGVPVSLTMCKLT-SGKYPNCRKKEKRONKSYVVACKPPqkksqqFHLVPVHLDRVL-<br/> ---K-ESAAAKFERQHMDSGNSpSSsTYCNQMMRRRNMTQGRCKPVNTFVHEPLVDVQNVCFQEKVTCKngQ--G-NCYKSNSSMHITDRLTNGSRYPNCAVRTSOKERHIIVACEGSPYVPVHFASVe</p>       |
| 845 | <p>1m58A<br/>(106)</p> <hr/> <p>1h8xA<br/>(125)</p> | N | 23.58 | <p><b>TM-align:</b> aliSize=86 (resi) RMSD=2.58 (Å)<br/> mqnwetfqkhltdlr-----DVKCDAEKKAALFD---CKQKNTFIYARPGRQALCKN-Iv-----SKNVLSTDEFYLSDCNRIK-LP---CHYKLLKSSNTICITCEN--KLPVHVVVEEcp<br/> -----kesaaakferqhmdsgnspsSSSTYCNQMMRRRNMTQGRCKPVNTFVHEPLVDVQNVCFQEK---vtckngqGNCYKSNSSMHITDRLTNGSRYPNCAVRTSOKERHIIVACEGspYVPVHFDA-SVE---</p> <p><b>SARST:</b> aliSize=90 (resi) RMSD=14.42 (Å)<br/> mqn-----WETfQKK---HLTDTRDVKCDAEKKAALFD---CKQKNTFIYARPGRQALCKN-Iv-----SKNVLSTDEFYLSDCNRIK-LP---CHYKLLKSSNTICITCEN--KLPVHVVVEEcp<br/> ---kesaaAKFERQHmdsgnsPSsSSTYCNQMMRRRNMTQgrCKPVNTFVHEPLVDVQNVCFqekvtckngqgncyksSNSSMHITDRLTNGS-----RYNCAVRTSokerHIIVACEGSPYVPVHFdasve----</p> <p><b>BLAST:</b> aliSize=52 (resi) iden=28.30% (30/106) simi=49.06% (52/106)<br/> mqnwet-----QKKHLTD---TRDVKCDAEKKAALFD---CKQKNTFIYARPGRQALCKN-IvSKNVLSTDEFYLSDCNRIK-LP---CHYKLLKSSNTICITCEN--KLPVHVVVEEcp<br/> -----kesaaakFERQHMDSGNSpSSSTYCNQMMRRRNMTQgrCKPVNTFVHEPLVDVQNVCFQEKVTCKngqncyksSNSSMHITDRLTNGSRYPNCAVRTSOKERHIIVACEGSPYVPVHFdasve---</p> <p><b>Proposed:</b> aliSize=99 (resi) RMSD=2.07 (Å)<br/> -MQNWETQKKHLTDTRDV-----KCDAEKKAALFD---CKQKNTFIYARPGRQALCKN-Iv-----SKNVLSTDEFYLSDCNRIK-LP---CHYKLLKSSNTICITCEN--KLPVHVVVEEcp<br/> kESAAAKFERQHMDSGNSPSSsSTYCNQMMRRRNMTQgrCKPVNTFVHEPLVDVQNVCFqekvtckngq---GNCYKSNSSMHITDRLTNGSRYPNCAVRTSOKERHIIVACEGspYVPVHFDA-Sve---</p>                                                                               |

|     |                                               |   |       |                                                                                                                                                                                                                                                                                                                                                                                                                                                                                                                                                                                                                                                                                                                                                                                                                                                                                                                                                                                                                                                                                                                                                                                                                                                                                                                                                                                                                                                                              |
|-----|-----------------------------------------------|---|-------|------------------------------------------------------------------------------------------------------------------------------------------------------------------------------------------------------------------------------------------------------------------------------------------------------------------------------------------------------------------------------------------------------------------------------------------------------------------------------------------------------------------------------------------------------------------------------------------------------------------------------------------------------------------------------------------------------------------------------------------------------------------------------------------------------------------------------------------------------------------------------------------------------------------------------------------------------------------------------------------------------------------------------------------------------------------------------------------------------------------------------------------------------------------------------------------------------------------------------------------------------------------------------------------------------------------------------------------------------------------------------------------------------------------------------------------------------------------------------|
| 846 | <p>2e0oB<br/>(125)</p> <p>1h8xA<br/>(125)</p> | N | 86.40 | <p>TM-align: aliSize=105 (resi) RMSD=1.39 (Å)<br/> mkesrakkfqrqhmds <b>ssp-----SS-SST</b> YCNQMMRRRNMTQGRCKPVNTFVHEPLLLVQLVCLQEKVTCKNGOGNCKYKSNSSSMHITDCRLTNGSRYPCAYRTSPKERHIIVACEGSPYVPVHFDASe<br/> -----kesaakferqhmdsg <b>nsPSsSST</b> YCNQMMRRRNMTQGRCKPVNTFVHEPLVDVQNVCFQEKVTCKNGOGNCKYKSNSSSMHITDCRLTNGSRYPCAYRTSPKERHIIVACEGSPYVPVHFDASe</p> <p>SARST: aliSize=122 (resi) RMSD=14.14 (Å)<br/> mk- <b>ESRKKFQROHMDS</b> <b>DSSPSSSST</b> YCNQMMRRRNMTQGRCKPVNTFVHEPLLLVQLVCLQEKVTCKNGOGNCKYKSNSSSMHITDCRLTNGSRYPCAYRTSPKERHIIVACEGSPYVPVHFDASe--v<br/> --k <b>ESAAAKFEROHMDS</b> <b>GNSPSSSST</b> YCNQMMRRRNMTQGRCKPVNTFVHEPLVDVQNVCFQEKVTCKNGOGNCKYKSNSSSMHITDCRLTNGSRYPCAYRTSPKERHIIVACEGSPYVPVHFDASeve-</p> <p>BLAST: aliSize=117 (resi) iden=91.20% (114/125) simi=93.60% (117/125)<br/> m <b>KESRKKFQROHMDS</b> <b>DSSPSSSST</b> YCNQMMRRRNMTQGRCKPVNTFVHEPLLLVQLVCLQEKVTCKNGOGNCKYKSNSSSMHITDCRLTNGSRYPCAYRTSPKERHIIVACEGSPYVPVHFDASe-<br/> - <b>KESAAAKFEROHMDS</b> <b>GNSPSSSST</b> YCNQMMRRRNMTQGRCKPVNTFVHEPLVDVQNVCFQEKVTCKNGOGNCKYKSNSSSMHITDCRLTNGSRYPCAYRTSPKERHIIVACEGSPYVPVHFDASe</p> <p>Proposed: aliSize=121 (resi) RMSD=0.95 (Å)<br/> m <b>KESRKKFQROHMDS</b> <b>DSSPS--ssST</b> YCNQMMRRRNMTQGRCKPVNTFVHEPLLLVQLVCLQEKVTCK-NGQg-NCYKSNSSSMHITDCRLTNGSRYPCAYRTSPKERHIIVACEGSPYVPVHFDASe-<br/> - <b>KESAAAKFEROHMDS</b> <b>GNSPSSs--ST</b> YCNQMMRRRNMTQGRCKPVNTFVHEPLVDVQNVCFQEKVTCKnGQG-NCYKSNSSSMHITDCRLTNGSRYPCAYRTSPKERHIIVACEGSPYVPVHFDASe</p> |
| 847 | <p>1ymnA<br/>(124)</p> <p>1h8xA<br/>(125)</p> | N | 69.35 | <p>TM-align: aliSize=105 (resi) RMSD=1.80 (Å)<br/> ketaaakferqhmds <b>ts-----AASSS</b> NYCQMMKSRNLTQDRCKPVNTFVHESLADVQAVCSOKNACKNGQTCYQSYSTMSITDCRETGSSKLPNCAYKITQANKHIIVACEGNPYVPVHFDASe-<br/> -----kesaakferqhmdsg <b>nsPSSSST</b> YCNQMMRRRNMTQGRCKPVNTFVHEPLVDVQNVCFQEKVTCKnGQG-NCYKSNSSSMHITDCRLTNGSRYPCAYRTSPKERHIIVACEGSPYVPVHFDASe</p> <p>SARST: aliSize=119 (resi) RMSD=14.46 (Å)<br/> k- <b>ETAAAKFEROHMDS</b> <b>ST---SAASs</b> NYCQMMKSRNLTQDRCKPVNTFVHESLADVQAVCSOKNACKNGQTCYQSYSTMSITDCRETGSSKLPNCAYKITQANKHIIVACEGNPYVPVHFDASe--v<br/> -k <b>ESAAAKFEROHMDS</b> <b>GNspsSSS---</b> YCNQMMRRRNMTQGRCKPVNTFVHEPLVDVQNVCFQEKVTCKNGOGNCKYKSNSSSMHITDCRLTNGSRYPCAYRTSPKERHIIVACEGSPYVPVHFDASeve-</p> <p>BLAST: aliSize=103 (resi) iden=72.58% (90/124) simi=83.06% (103/124)<br/> <b>KETAAAKFEROHMDS</b> <b>STAAASSS</b> NYCQMMKSRNLTQDRCKPVNTFVHESLADVQAVCSOKNACKNGQTCYQSYSTMSITDCRETGSSKLPNCAYKITQANKHIIVACEGNPYVPVHFDASe-<br/> <b>KESAAAKFEROHMDS</b> <b>GNSPSSSST</b> YCNQMMRRRNMTQGRCKPVNTFVHEPLVDVQNVCFQEKVTCKNGOGNCKYKSNSSSMHITDCRLTNGSRYPCAYRTSPKERHIIVACEGSPYVPVHFDASe</p> <p>Proposed: aliSize=122 (resi) RMSD=1.13 (Å)<br/> <b>KETAAAKFEROHMDS</b> <b>STsAAS-SS</b> NYCQMMKSRNLTQDRCKPVNTFVHESLADVQAVCSOKNACK-NGQt-NCYQSYSTMSITDCRETGSSKLPNCAYKITQANKHIIVACEGNPYVPVHFDASe-<br/> <b>KESAAAKFEROHMDS</b> <b>GN-SPsSSS---</b> YCNQMMRRRNMTQGRCKPVNTFVHEPLVDVQNVCFQEKVTCKnGQG-NCYKSNSSSMHITDCRLTNGSRYPCAYRTSPKERHIIVACEGSPYVPVHFDASe</p>                    |
| 848 | <p>1a5pA<br/>(124)</p> <p>1h8xA<br/>(125)</p> | N | 68.55 | <p>TM-align: aliSize=105 (resi) RMSD=1.67 (Å)<br/> ketaaakferqhmds <b>ts-----AAs-SS</b> NYCQMMKSRNLTQDRAPVNTFVHESLADVQAVCSOKNACKNGQTCYQSYSTMSITDCRETGSSKYPNAAKITQANKHIIVACEGNPYVPVHFDASe-<br/> -----kesaakferqhmdsg <b>nsPS-sSST</b> YCNQMMRRRNMTQGRCKPVNTFVHEPLVDVQNVCFQEKVTCKNGOGNCKYKSNSSSMHITDCRLTNGSRYPCAYRTSPKERHIIVACEGSPYVPVHFDASe</p> <p>SARST: aliSize=119 (resi) RMSD=14.37 (Å)<br/> k- <b>ETAAAKFEROHMDS</b> <b>ST---SAAss</b> NYCQMMKSRNLTQDRAPVNTFVHESLADVQAVCSOKNACKNGQTCYQSYSTMSITDCRETGSSKYPNAAKITQANKHIIVACEGNPYVPVHFDASe--v<br/> -k <b>ESAAAKFEROHMDS</b> <b>GNspsSSS---</b> YCNQMMRRRNMTQGRCKPVNTFVHEPLVDVQNVCFQEKVTCKNGOGNCKYKSNSSSMHITDCRLTNGSRYPCAYRTSPKERHIIVACEGSPYVPVHFDASeve-</p> <p>BLAST: aliSize=102 (resi) iden=71.77% (89/124) simi=82.26% (102/124)<br/> <b>KETAAAKFEROHMDS</b> <b>STAAASSS</b> NYCQMMKSRNLTQDRAPVNTFVHESLADVQAVCSOKNACKNGQTCYQSYSTMSITDCRETGSSKYPNAAKITQANKHIIVACEGNPYVPVHFDASe-<br/> <b>KESAAAKFEROHMDS</b> <b>GNSPSSSST</b> YCNQMMRRRNMTQGRCKPVNTFVHEPLVDVQNVCFQEKVTCKNGOGNCKYKSNSSSMHITDCRLTNGSRYPCAYRTSPKERHIIVACEGSPYVPVHFDASe</p> <p>Proposed: aliSize=122 (resi) RMSD=1.05 (Å)<br/> <b>KETAAAKFEROHMDS</b> <b>STsAA-SSS</b> NYCQMMKSRNLTQDRAPVNTFVHESLADVQAVCSOKNACK-NGQt-NCYQSYSTMSITDCRETGSSKYPNAAKITQANKHIIVACEGNPYVPVHFDASe-<br/> <b>KESAAAKFEROHMDS</b> <b>GN-SPsSSS---</b> YCNQMMRRRNMTQGRCKPVNTFVHEPLVDVQNVCFQEKVTCKnGQG-NCYKSNSSSMHITDCRLTNGSRYPCAYRTSPKERHIIVACEGSPYVPVHFDASe</p>                          |

|     |                                               |   |       |                                                                                                                                                                                                                                                                                                                                                                                                                                                                                                                                                                                                                                                                                                                                                                                                                                                                                                                                                                                                                                                                                                                                                                                                                                                                                                                                                                                                                                     |
|-----|-----------------------------------------------|---|-------|-------------------------------------------------------------------------------------------------------------------------------------------------------------------------------------------------------------------------------------------------------------------------------------------------------------------------------------------------------------------------------------------------------------------------------------------------------------------------------------------------------------------------------------------------------------------------------------------------------------------------------------------------------------------------------------------------------------------------------------------------------------------------------------------------------------------------------------------------------------------------------------------------------------------------------------------------------------------------------------------------------------------------------------------------------------------------------------------------------------------------------------------------------------------------------------------------------------------------------------------------------------------------------------------------------------------------------------------------------------------------------------------------------------------------------------|
| 849 | <p>2bw1A<br/>(118)</p> <p>1h8xA<br/>(125)</p> | N | 37.29 | <p><b>TM-align:</b> aliSize=97 (resi) RMSD=1.85 (Å)<br/> ddsrytkfl tqhhda kpkgr-----RD--DRY CERMMKRRSLTS-PCKDINTFIHGKNSNIKAI C GanGSPYRE-----NLRMSKSPFOVITTKHIGGSPRPPOYRASAGFRHVVIACEN--GLPVHFD E S F F<br/> -----kesaaakferqhmdsgnsPSsSTYCNQMMRRRNMTQGRCKPVNTFVHEPLVDVQNVCF--QEKVTCKngqgCYKSNSSMHIIDRLTNGSRYPNCAAYRTSQKERHII VACEGspYVPVHFDA S VE</p> <p><b>SARST:</b> aliSize=105 (resi) RMSD=14.53 (Å)<br/> dd--SRYTKFLTOHHDAKPKgrDDR----YCERMMKRRSLTS-PCKDINTFIHGKNSNIKAI C G-----ANGSPYrenLRMSKSPFOVITTKHIGGSPRPPOYRASAGFRHVVIACEN--GLPVHFD-----desf<br/> --keSAAAKFERQHMDSGN---SPSsSTYCNQMMRRRNMTQGRCKPVNTFVHEPLVDVQNVCFQekvtckNGQGN---CYKSNSSMHIIDRLTNGSRYPNCAAYRTSQKERHII VACEGspYVPVHFdasve----</p> <p><b>BLAST:</b> aliSize=64 (resi) iden=39.32% (46/118) simi=54.70% (64/118)<br/> d--DSRYTKFLTOHHDA--KPKGrDDR Y CERMMKRRSLTS-PCKDINTFIHGKNSNIKAI C GANGSPYRE---NLRMSKSPFOVITTKHIGGSPRPPOYRASAGFRHVVIACEN--LPVHFD E S --f<br/> --kesAAAKFERQHMDsgnSPSS-SSTYCNQMMRRRNMTQGRCKPVNTFVHEPLVDVQNVCFQEKVTCKngqgCYKSNSSMHIIDRLTNGSRYPNCAAYRTSQKERHII VACEGspYVPVHFDA S ve-</p> <p><b>Proposed:</b> aliSize=113 (resi) RMSD=1.56 (Å)<br/> DDSRYTKFLTOHHDAKPKGR---ddRY CERMMKRRSLTS-PCKDINTFIHGKNSNIKAI C GanGSPYRE-----NLRMSKSPFOVITTKHIGGSPRPPOYRASAGFRHVVIACEN--GLPVHFD E s F - F<br/> KE SAAAKFERQHMDSGNSPSSs--TYCNQMMRRRNMTQGRCKPVNTFVHEPLVDVQNVCF--QEKVTCKngqgCYKSNSSMHIIDRLTNGSRYPNCAAYRTSQKERHII VACEGspYVPVHFDA -SvE</p> |
| 850 | <p>1gy7A<br/>(123)</p> <p>1h8xA<br/>(125)</p> | N | 40.65 | <p><b>TM-align:</b> aliSize=103 (resi) RMSD=2.17 (Å)<br/> dnsrythfl tqhydak bq-----GR-DDRY CESIMRRRGLTS-PCKDINTFIHGKRSIKAI CSKNVACKNGQ TNCYISKSSFOVITTKLHGGSPPWPCOYRATAGFRNVVACEN--GLPVHLDQsIFR<br/> -----kesaaakferqhmdsgnsPSsSSTYCNQMMRRRNMTQGRCKPVNTFVHEPLVDVQNVCFQEKVTCKNGQNCYKSNSSMHIIDRLTNGSRYPNCAAYRTSQKERHII VACEGspYVPVHFDA -SVE</p> <p><b>SARST:</b> aliSize=89 (resi) RMSD=15.31 (Å)<br/> dns---RYTHFLTOHYDAKP---QGRddrY CESIMRRRGLTS-PCKDINTFIHGKRSIKAI CSKNVACKN-----GQTncyiskssfqvttcklhggspwPPOYRATAGFRNVVACEN--GLPVHL-----dqsifr<br/> ---kesAAAKFERQHMDSGNSpsSSTI---TYCNQMMRRRNMTQGRCKPVNTFVHEPLVDVQNVCFQEKVTCKngqncyksnssmhitdcrlnGSR-----YPNCAAYRTSQKERHII VACEGspYVPVHFdasve-----</p> <p><b>BLAST:</b> aliSize=69 (resi) iden=41.80% (51/123) simi=56.56% (69/123)<br/> dnsryth-----LTQHYDA--KPOGrDDRY CESIMRRRGLTS-PCKDINTFIHGKRSIKAI CSKNVACKNGQ TNCYISKSSFOVITTKLHGGSPPWPCOYRATAGFRNVVACEN--LPVHLDQsI -fr<br/> -----kesaaakFERQHMDsgnSPSS-SSTYCNQMMRRRNMTQGRCKPVNTFVHEPLVDVQNVCFQEKVTCKNGQNCYKSNSSMHIIDRLTNGSRYPNCAAYRTSQKERHII VACEGspYVPVHFDA S ve--</p> <p><b>Proposed:</b> aliSize=117 (resi) RMSD=1.67 (Å)<br/> pDNSRYTHFLTOHYDAKPOGR---ddRY CESIMRRRGLTS-PCKDINTFIHGKRSIKAI CSKNVACKNGQ TNCYISKSSFOVITTKLHGGSPPWPCOYRATAGFRNVVACEN--GLPVHLDQsI--fr<br/> --KESAAAKFERQHMDSGNSPSSs--TYCNQMMRRRNMTQGRCKPVNTFVHEPLVDVQNVCFQEKVTCKNGQNCYKSNSSMHIIDRLTNGSRYPNCAAYRTSQKERHII VACEGspYVPVHFDA -Sve--</p>        |
| 851 | <p>1rraA<br/>(124)</p> <p>1h8xA<br/>(125)</p> | N | 62.10 | <p><b>TM-align:</b> aliSize=104 (resi) RMSD=1.31 (Å)<br/> aessadkfrqhmdte gps-----KS-SPTYCNQMMKROGMTKCSCKPVNTFVHEPLEDVQAI CS GOVTC-KNGRnNCHKSSSTLRITDCRLKGS SKYPNCDYTTTDSQKHII IACDGNPYVPVHFDA S V -<br/> -----kesaaakferqhmdsgnsPSsSSTYCNQMMRRRNMTQGRCKPVNTFVHEPLVDVQNVCFQEKVTCKNGQNCYKSNSSMHIIDRLTNGSRYPNCAAYRTSQKERHII VACEGSPYVPVHFDA S ve</p> <p><b>SARST:</b> aliSize=120 (resi) RMSD=14.28 (Å)<br/> a--SSADKFKROHMDTEGP--SKSspTYCNQMMKROGMTKCSCKPVNTFVHEPLEDVQAI CS GOVTCNGRNCHKSSSTLRITDCRLKGS SKYPNCDYTTTDSQKHII IACDGNPYVPVHFDA S --v<br/> --kesAAAKFERQHMDSGNSpsSSS--TYCNQMMRRRNMTQGRCKPVNTFVHEPLVDVQNVCFQEKVTCKNGQNCYKSNSSMHIIDRLTNGSRYPNCAAYRTSQKERHII VACEGSPYVPVHFDA S ve-</p> <p><b>BLAST:</b> aliSize=101 (resi) iden=65.32% (81/124) simi=81.45% (101/124)<br/> a--SSADKFKROHMDTEGPSKSSPT YCNQMMKROGMTKCSCKPVNTFVHEPLEDVQAI CS GOVTCNGRNCHKSSSTLRITDCRLKGS SKYPNCDYTTTDSQKHII IACDGNPYVPVHFDA S V -<br/> --kesAAAKFERQHMDSGNSPSSSSTYCNQMMRRRNMTQGRCKPVNTFVHEPLVDVQNVCFQEKVTCKNGQNCYKSNSSMHIIDRLTNGSRYPNCAAYRTSQKERHII VACEGSPYVPVHFDA S ve</p> <p><b>Proposed:</b> aliSize=122 (resi) RMSD=1.14 (Å)<br/> AESSADKFKROHMDTEGPSK-SsPTYCNQMMKROGMTKCSCKPVNTFVHEPLEDVQAI CS GOVTC-KNGRnNCHKSSSTLRITDCRLKGS SKYPNCDYTTTDSQKHII IACDGNPYVPVHFDA S V -<br/> KESAAAKFERQHMDSGNSPSSS-SSTYCNQMMRRRNMTQGRCKPVNTFVHEPLVDVQNVCFQEKVTCKNGQNCYKSNSSMHIIDRLTNGSRYPNCAAYRTSQKERHII VACEGSPYVPVHFDA S ve</p>                         |

|     |                                               |   |       |                                                                                                                                                                                                                                                                                                                                                                                                                                                                                                                                                                                                                                                                                                                                                                                                                                                                                                                                                                                                                                                                                                                                                                                                                                                                                                                                                                                                                                |
|-----|-----------------------------------------------|---|-------|--------------------------------------------------------------------------------------------------------------------------------------------------------------------------------------------------------------------------------------------------------------------------------------------------------------------------------------------------------------------------------------------------------------------------------------------------------------------------------------------------------------------------------------------------------------------------------------------------------------------------------------------------------------------------------------------------------------------------------------------------------------------------------------------------------------------------------------------------------------------------------------------------------------------------------------------------------------------------------------------------------------------------------------------------------------------------------------------------------------------------------------------------------------------------------------------------------------------------------------------------------------------------------------------------------------------------------------------------------------------------------------------------------------------------------|
| 852 | <p>2q4gX<br/>(126)</p> <p>1h8xA<br/>(125)</p> | N | 89.60 | <p>TM-align: aliSize=106 (resi) RMSD=1.45 (Å)<br/> esrakkfqrqhmdsdsp-----SS-SSTYCNOQMMRRRNMTQGRCKPVNTFVHEPLVDVQNVCFQEKVTCKNGOGNCYKSNSSMHI TDCRLTNGSRYPNCAVRTSPKERHI IVACEGSPYVPVHFDA SVE ds<br/> -----kesaaakferqhmdsgnsPSsSSTYCNOQMMRRRNMTQGRCKPVNTFVHEPLVDVQNVCFQEKVTCKNGOGNCYKSNSSMHI TDCRLTNGSRYPNCAVRTSQKERHI IVACEGSPYVPVHFDA SVE ---</p> <p>SARST: aliSize=118 (resi) RMSD=10.94 (Å)<br/> esra----KkFQROHMDSDSSPSSSTYCNOQMMRRRNMTQGRCKPVNTFVHEPLVDVQNVCFQEKVTCKNGOGNCYKSNSSMHI TDCRLTNGSRYPNCAVRTSPKERHI IVACEGSPYVPVHFDA S--veds<br/> ---kesaaakFEROHMDSGNSPSSSTYCNOQMMRRRNMTQGRCKPVNTFVHEPLVDVQNVCFQEKVTCKNGOGNCYKSNSSMHI TDCRLTNGSRYPNCAVRTSQKERHI IVACEGSPYVPVHFDA SVE----</p> <p>BLAST: aliSize=120 (resi) iden=94.40% (118/125) simi=96.00% (120/125)<br/> -ESRAKKFQROHMDSDSSPSSSTYCNOQMMRRRNMTQGRCKPVNTFVHEPLVDVQNVCFQEKVTCKNGOGNCYKSNSSMHI TDCRLTNGSRYPNCAVRTSPKERHI IVACEGSPYVPVHFDA SVE ds<br/> kESAAAKFEROHMDSGNSPSSSTYCNOQMMRRRNMTQGRCKPVNTFVHEPLVDVQNVCFQEKVTCKNGOGNCYKSNSSMHI TDCRLTNGSRYPNCAVRTSQKERHI IVACEGSPYVPVHFDA SVE ---</p> <p>Proposed: aliSize=122 (resi) RMSD=1.11 (Å)<br/> -ESRAKKFQROHMDSDSSPS-SsSTYCNOQMMRRRNMTQGRCKPVNTFVHEPLVDVQNVCFQEKVTC--kNgQg-NCYKSNSSMHI TDCRLTNGSRYPNCAVRTSPKERHI IVACEGSPYVPVHFDA SVE ds<br/> kESAAAKFEROHMDSGNSPSsS-S TYCNOQMMRRRNMTQGRCKPVNTFVHEPLVDVQNVCFQEKVTCknGQg-NCYKSNSSMHI TDCRLTNGSRYPNCAVRTSQKERHI IVACEGSPYVPVHFDA SVE ---</p>                        |
| 853 | <p>2k11A<br/>(127)</p> <p>1h8xA<br/>(125)</p> | N | 89.60 | <p>TM-align: aliSize=104 (resi) RMSD=1.73 (Å)<br/> kesrakkfqrqhmdsdssp-----SSS--STYCNOQMMRRRNMTQGRCKPVNTFVHEPLVDVQNVCFQEKVTC--kNgQg-NCYKSNSSMHI TDCRLTNGSRYPNCAVRTSPKERHI IVACEGSPYVPVHFDA SVE ds<br/> -----kesaaakferqhmdsgnSPSSsSTYCNOQMMRRRNMTQGRCKPVNTFVHEPLVDVQNVCFQEKVTCknGQ-G-NCYKSNSSMHI TDCRLTNGSRYPNCAVRTSQKERHI IVACEGSPYVPVHFDA SVE ---</p> <p>SARST: aliSize=101 (resi) RMSD=2.03 (Å)<br/> kesrakkfqrqhmdsdsspss-----SS TYCNOQMMRRRNMTQGRCKPVNTFVHEPLVDVQNVCFQEKVTC--kNgQg-NCYKSNSSMHI TDCRLTNGSRYPNCAVRTSPKERHI IVACEGSPYVPVHFDA S--sveds<br/> -----kesaaakferqhmdsgnspssSS TYCNOQMMRRRNMTQGRCKPVNTFVHEPLVDVQNVCFQEKVTCknGQ-G-NCYKSNSSMHI TDCRLTNGSRYPNCAVRTSQKERHI IVACEGSPYVPVHFDA SVE----</p> <p>BLAST: aliSize=121 (resi) iden=95.20% (119/125) simi=96.80% (121/125)<br/> KESRAKKFQROHMDSDSSPSSSTYCNOQMMRRRNMTQGRCKPVNTFVHEPLVDVQNVCFQEKVTC--kNgQg-NCYKSNSSMHI TDCRLTNGSRYPNCAVRTSPKERHI IVACEGSPYVPVHFDA SVE ds<br/> KESAAAKFEROHMDSGNSPSSSTYCNOQMMRRRNMTQGRCKPVNTFVHEPLVDVQNVCFQEKVTCknGQ-G-NCYKSNSSMHI TDCRLTNGSRYPNCAVRTSQKERHI IVACEGSPYVPVHFDA SVE ---</p> <p>Proposed: aliSize=122 (resi) RMSD=1.58 (Å)<br/> KESRAKKFQROHMDSDSSP-SSSTYCNOQMMRRRNMTQGRCKPVNTFVHEPLVDVQNVCFQEKVTC--kNgQg-NCYKSNSSMHI TDCRLTNGSRYPNCAVRTSPKERHI IVACEGSPYVPVHFDA SVE ds<br/> KESAAAKFEROHMDSGNSpSSSTYCNOQMMRRRNMTQGRCKPVNTFVHEPLVDVQNVCFQEKVTCknGQ-G-NCYKSNSSMHI TDCRLTNGSRYPNCAVRTSQKERHI IVACEGSPYVPVHFDA SVE ---</p> |
| 854 | <p>2aasA<br/>(124)</p> <p>1h8xA<br/>(125)</p> | N | 70.16 | <p>TM-align: aliSize=105 (resi) RMSD=1.88 (Å)<br/> ketaaakferqhmdsstsa-----A SSSNYCNOQMKSRNLTKDRCKPVNTFVHESLADVQAVCSJKNVACKNGGTNCYOSYSTMSITDCRETGSSKYPNCAKTTQANKHI IVACEGNPYVPVHFDA S--v<br/> -----kesaaakferqhmdsgnsPSsSSTYCNOQMKSRNLTKDRCKPVNTFVHESLADVQAVCSJKNVACKNGGTNCYOSYSTMSITDCRETGSSKYPNCAKTTQANKHI IVACEGSPYVPVHFDA SVE e</p> <p>SARST: aliSize=118 (resi) RMSD=14.39 (Å)<br/> k-ETAAAKFEROHMDSTsaaSS---NYCNOQMKSRNLTKDRCKPVNTFVHESLADVQAVCSJKNVACKNGGTNCYOSYSTMSITDCRETGSSKYPNCAKTTQANKHI IVACEGNPYVPVHFDA S--v<br/> -kESAAAKFEROHMDSGN---SPs sssTYCNOQMKSRNLTKDRCKPVNTFVHESLADVQAVCSJKNVACKNGGTNCYOSYSTMSITDCRETGSSKYPNCAKTTQANKHI IVACEGSPYVPVHFDA SVE----</p> <p>BLAST: aliSize=104 (resi) iden=73.39% (91/124) simi=83.87% (104/124)<br/> KETAAAKFEROHMDSTsAA SSSNYCNOQMKSRNLTKDRCKPVNTFVHESLADVQAVCSJKNVACKNGGTNCYOSYSTMSITDCRETGSSKYPNCAKTTQANKHI IVACEGNPYVPVHFDA S--v<br/> KESAAAKFEROHMDSGNSPSSSTYCNOQMKSRNLTKDRCKPVNTFVHESLADVQAVCSJKNVACKNGGTNCYOSYSTMSITDCRETGSSKYPNCAKTTQANKHI IVACEGSPYVPVHFDA SVE e</p> <p>Proposed: aliSize=120 (resi) RMSD=1.32 (Å)<br/> KETAAAKFEROHMDSTsAA--SS-sNYCNOQMKSRNLTKDRCKPVNTFVHESLADVQAVCSJKNVACK--NgGTNCYOSYSTMSITDCRETGSSKYPNCAKTTQANKHI IVACEGNPYVPVHFDA S--v<br/> KESAAAKFEROHMDSGN-SPs sSt--YCNOQMKSRNLTKDRCKPVNTFVHESLADVQAVCSJKNVACKng-GTNCYOSYSTMSITDCRETGSSKYPNCAKTTQANKHI IVACEGSPYVPVHFDA SVE e</p>                                                         |

|     |                                                     |   |       |                                                                                                                                                                                                                                                                                                                                                                                                                                                                                                                                                                                                                                                                                                                                                                                                                                                                                                                                                                                                                                                                                                                                                                                                                                                                                                                                                                                 |
|-----|-----------------------------------------------------|---|-------|---------------------------------------------------------------------------------------------------------------------------------------------------------------------------------------------------------------------------------------------------------------------------------------------------------------------------------------------------------------------------------------------------------------------------------------------------------------------------------------------------------------------------------------------------------------------------------------------------------------------------------------------------------------------------------------------------------------------------------------------------------------------------------------------------------------------------------------------------------------------------------------------------------------------------------------------------------------------------------------------------------------------------------------------------------------------------------------------------------------------------------------------------------------------------------------------------------------------------------------------------------------------------------------------------------------------------------------------------------------------------------|
| 855 | <p>2nuiA<br/>(124)</p> <hr/> <p>1h8xA<br/>(125)</p> | N | 68.55 | <p><b>TM-align:</b> aliSize=106 (resi) RMSD=1.91 (Å)<br/> ketaaakferqhmds <b>st</b>-----AASSSNYCNQMMKSRNLIKDRCKPVNTFVHESLADVQAVCSOKNACKNGGTNCYQSYSTMSITACRETGSSKYPNCAYKITQANKHIIVACEGNPYVPVHFDASV-<br/> -----kesaaakferqhmds <b>gnsPSSSS</b>TYCNQMMRRRNMTOGRCKPVNTFVHEPLVDVQNVCFQEKVTCKNGGNCYKNSSMHITDCLRLNGSRYPNCAYRTSOKERHIIVACEGSPYVPVHFDASVe</p> <p><b>SARST:</b> aliSize=119 (resi) RMSD=14.38 (Å)<br/> k-ETAAAKFERQHMDST---SAASsnNYCNQMMKSRNLIKDRCKPVNTFVHESLADVQAVCSOKNACKNGGTNCYQSYSTMSITACRETGSSKYPNCAYKITQANKHIIVACEGNPYVPVHFDAS--v<br/> -kESAAAKFERQHMDSGNspsSSST---TYCNQMMRRRNMTOGRCKPVNTFVHEPLVDVQNVCFQEKVTCKNGGNCYKNSSMHITDCLRLNGSRYPNCAYRTSOKERHIIVACEGSPYVPVHFDASve-</p> <p><b>BLAST:</b> aliSize=103 (resi) iden=72.58% (90/124) simi=83.06% (103/124)<br/> KETAAAKFERQHMDSTSAASSNYCNQMMKSRNLIKDRCKPVNTFVHESLADVQAVCSOKNACKNGGTNCYQSYSTMSITACRETGSSKYPNCAYKITQANKHIIVACEGNPYVPVHFDASV-<br/> KESAAAKFERQHMDSGNSPSSSTTYCNQMMRRRNMTOGRCKPVNTFVHEPLVDVQNVCFQEKVTCKNGGNCYKNSSMHITDCLRLNGSRYPNCAYRTSOKERHIIVACEGSPYVPVHFDASVe</p> <p><b>Proposed:</b> aliSize=122 (resi) RMSD=1.04 (Å)<br/> KETAAAKFERQHMDSTsAAS-SSNYCNQMMKSRNLIKDRCKPVNTFVHESLADVQAVCSOKNAC-KNGQtNCYQSYSTMSITACRETGSSKYPNCAYKITQANKHIIVACEGNPYVPVHFDASV-<br/> KESAAAKFERQHMDSGN-SPSSSTTYCNQMMRRRNMTOGRCKPVNTFVHEPLVDVQNVCFQEKVTCKNGG-NCYKNSSMHITDCLRLNGSRYPNCAYRTSOKERHIIVACEGSPYVPVHFDASVe</p>     |
| 856 | <p>1qwqA<br/>(124)</p> <hr/> <p>1h8xA<br/>(125)</p> | N | 70.97 | <p><b>TM-align:</b> aliSize=104 (resi) RMSD=2.24 (Å)<br/> kesaaakferqhmdsgns-----PSSSSNYCNLMCCRKMTQGKCKPVNTFVHESLADVQAVCSOKKVTG--KDgqTNCYQSKSTMRTDCRETGSSKYPNCAYKITQVEKHIIVACGGKPSVPVHFDASV-<br/> -----kesaaakferqhmdsgnsPSSSTTYCNQMMRRRNMTOGRCKPVNTFVHEPLVDVQNVCFQEKVTCKNGGNCYKNSSMHITDCLRLNGSRYPNCAYRTSOKERHIIVACEGSPYVPVHFDASVe</p> <p><b>SARST:</b> aliSize=99 (resi) RMSD=2.15 (Å)<br/> kesaaakferqhmdsgns <b>psssn</b>-----TYCNLMCCRKMTQGKCKPVNTFVHESLADVQAVCSOKKVTCKDGTNCYQSKSTMRTDCRETGSSKYPNCAYKITQVEKHIIVACGGKPSVPVHFDAS--v<br/> -----kesaaakferqhmdsgnspsssstTYCNQMMRRRNMTOGRCKPVNTFVHEPLVDVQNVCFQEKVTCKNGGNCYKNSSMHITDCLRLNGSRYPNCAYRTSOKERHIIVACEGSPYVPVHFDASve-</p> <p><b>BLAST:</b> aliSize=105 (resi) iden=76.61% (95/124) simi=84.68% (105/124)<br/> KESAAAKFERQHMDSGNSPSSSSNYCNLMCCRKMTQGKCKPVNTFVHESLADVQAVCSOKKVTCKDGTNCYQSKSTMRTDCRETGSSKYPNCAYKITQVEKHIIVACGGKPSVPVHFDASV-<br/> KESAAAKFERQHMDSGNSPSSSTTYCNQMMRRRNMTOGRCKPVNTFVHEPLVDVQNVCFQEKVTCKNGGNCYKNSSMHITDCLRLNGSRYPNCAYRTSOKERHIIVACEGSPYVPVHFDASVe</p> <p><b>Proposed:</b> aliSize=118 (resi) RMSD=1.68 (Å)<br/> KESAAAKFERQHMDSGN---sPSSsnNYCNLMCCRKMTQGKCKPVNTFVHESLADVQAVCSOKKVTG--KDgqTNCYQSKSTMRTDCRE--gSSKYPNCAYKITQVEKHIIVACGGKPSVPVHFDASV-<br/> KESAAAKFERQHMDSGNspss--SSS--TYCNQMMRRRNMTOGRCKPVNTFVHEPLVDVQNVCFQEKVTCKNGG--GNCYKNSSMHITDCLRLn-GSRYPNCAYRTSOKERHIIVACEGSPYVPVHFDASVe</p> |
| 857 | <p>lizpA<br/>(124)</p> <hr/> <p>1h8xA<br/>(125)</p> | N | 68.55 | <p><b>TM-align:</b> aliSize=105 (resi) RMSD=1.68 (Å)<br/> ketaaakferqhmdsst-----AAs-SSNYCNQMMKSRNLIKDRCKPVNTLVHESLADVQAVCSOKNACKNGGTNCYQSYSTMSITDCRETGSSKYPNCAYKITQANKHIIVACEGNPYVPVHFDASV-<br/> -----kesaaakferqhmdsgns <b>PS-s</b>SSTTYCNQMMRRRNMTOGRCKPVNTFVHEPLVDVQNVCFQEKVTCKNGGNCYKNSSMHITDCLRLNGSRYPNCAYRTSOKERHIIVACEGSPYVPVHFDASVe</p> <p><b>SARST:</b> aliSize=119 (resi) RMSD=14.37 (Å)<br/> k-ETAAAKFERQHMDST---SAAssNYCNQMMKSRNLIKDRCKPVNTLVHESLADVQAVCSOKNACKNGGTNCYQSYSTMSITDCRETGSSKYPNCAYKITQANKHIIVACEGNPYVPVHFDAS--v<br/> -kESAAAKFERQHMDSGNspsSSS---TYCNQMMRRRNMTOGRCKPVNTFVHEPLVDVQNVCFQEKVTCKNGGNCYKNSSMHITDCLRLNGSRYPNCAYRTSOKERHIIVACEGSPYVPVHFDASve-</p> <p><b>BLAST:</b> aliSize=103 (resi) iden=72.58% (90/124) simi=83.06% (103/124)<br/> KETAAAKFERQHMDSTSAASSNYCNQMMKSRNLIKDRCKPVNTLVHESLADVQAVCSOKNACKNGGTNCYQSYSTMSITDCRETGSSKYPNCAYKITQANKHIIVACEGNPYVPVHFDASV-<br/> KESAAAKFERQHMDSGNSPSSSTTYCNQMMRRRNMTOGRCKPVNTFVHEPLVDVQNVCFQEKVTCKNGGNCYKNSSMHITDCLRLNGSRYPNCAYRTSOKERHIIVACEGSPYVPVHFDASVe</p> <p><b>Proposed:</b> aliSize=121 (resi) RMSD=0.95 (Å)<br/> KETAAAKFERQHMDSTsAA--SSNYCNQMMKSRNLIKDRCKPVNTLVHESLADVQAVCSOKNACK-NGQtNCYQSYSTMSITDCRETGSSKYPNCAYKITQANKHIIVACEGNPYVPVHFDASV-<br/> KESAAAKFERQHMDSGN-SPSS-S-TYCNQMMRRRNMTOGRCKPVNTFVHEPLVDVQNVCFQEKVTCKnGQ--NCYKNSSMHITDCLRLNGSRYPNCAYRTSOKERHIIVACEGSPYVPVHFDASVe</p>          |

|     |                                                     |   |       |                                                                                                                                                                                                                                                                                                                                                                                                                                                                                                                                                                                                                                                                                                                                                                                                                                                                                                                                                                                                                                                                                                                                                                                                                                                                                                                                                                                                                                                                                                            |
|-----|-----------------------------------------------------|---|-------|------------------------------------------------------------------------------------------------------------------------------------------------------------------------------------------------------------------------------------------------------------------------------------------------------------------------------------------------------------------------------------------------------------------------------------------------------------------------------------------------------------------------------------------------------------------------------------------------------------------------------------------------------------------------------------------------------------------------------------------------------------------------------------------------------------------------------------------------------------------------------------------------------------------------------------------------------------------------------------------------------------------------------------------------------------------------------------------------------------------------------------------------------------------------------------------------------------------------------------------------------------------------------------------------------------------------------------------------------------------------------------------------------------------------------------------------------------------------------------------------------------|
| 858 | <p>2vq8A<br/>(128)</p> <hr/> <p>11bgA<br/>(124)</p> | N | 22.58 | <p><b>TM-align:</b> aliSize=93 (resi) RMSD=1.79 (Å)<br/> hmqpehvkerknflnqhvgpdm-----SVQRCSSEI GpnNRKI I l sgt DNGCKPVNTHILANKRLIKTVCGraGSPOG-----N-MVRSNQPFVVKVNLN-NGERHPYCEYRGTRSTRYI VLKCEE--GWPVHYHEDevn-<br/> -----kesaaakferqhmdsgnspssSSNYCNLMCC--CRKMT-----OGKCKPVNTHVHESLADVAVCS--QKKVTckngqTnCYOSKSTMRITDRETgSSKYP-NCAAYKTQVEKHIIVACGGkpsVPVHFdasv-----</p> <p><b>SARST:</b> aliSize=105 (resi) RMSD=9.62 (Å)<br/> hmqpehve---RYKNFLNQHV---GDMsVQRCSSEI GpnNRKI I l sgt DNGCKPVNTHILANKRLIKTVCGRAGSPQ-----NMVRSNQPFVVKVNLnGE--RHPYCEYRGTRSTRYI VLKCEE--VHY----hedevn<br/> -----kesAAAKFERQHMDsgnSPSS-SSNYCNLM-MCCRK-----MIOGKCKPVNTHVHESLADVAVCSQKKVTCKngqTnCYOSKSTMRITDRETgSSKYP-NCAAYKTQVEKHIIVACGGKPSVpVHFdasv-----</p> <p><b>BLAST:</b> aliSize=54 (resi) iden=27.42% (34/124) simi=43.55% (54/124)<br/> hmqpehvkerkn-----FLNQHV---GDMsVQRCSSEI GpnNRKI I l sgt DngCKPVNTHILANKRLIKTVCGR----AGSPGGMVRSNQPFVVKVNLNNGERHPYCEYRGTRSTRYI VLKCEE--EEGWPVHY----hedevn<br/> -----kesaaakFERQHMDsgnSPSSSSNYCNLMCC--CRKMT--OGK---CKPVNTHVHESLADVAVCSQkkvtCKNGqTnCYOSKSTMRITDRETGSSKYENCAAYKTQVEKHIIVACggKPSVpVHFdasv-----</p> <p><b>Proposed:</b> aliSize=108 (resi) RMSD=1.67 (Å)<br/> hmqpehv-KERYKNFLNQHVGPDM-MSVQ---RCNSEI GpnNRKI I l sgt DNGCKPVNTHILANKRLIKTVCGraGSPOG-----N-MVRSNQPFVVKVNLN-NGERHPYCEYRGTRSTRYI VLKCEE--GWPVHYHE--devn<br/> -----kESAAAKFERQHMDsgnSPSSsSNYCNLMCC--CRKMT-----OGKCKPVNTHVHESLADVAVCS--QKKVTckngqTnCYOSKSTMRITDRETgSSKYP-NCAAYKTQVEKHIIVACGGkpsVPVHFdasv-----</p> |
| 859 | <p>2vq8A<br/>(128)</p> <hr/> <p>1y92B<br/>(124)</p> | N | 23.39 | <p><b>TM-align:</b> aliSize=93 (resi) RMSD=1.84 (Å)<br/> hmqpehvkerknflnqhvgpdm-----SVQRCSSEI GpnNRKI I l sgt DNGCKPVNTHILANKRLIKTVCGraGSPOG-----N-MVRSNQPFVVKVNLN-NGERHPYCEYRGTRSTRYI VLKCEE--GWPVHYHEDevn-<br/> -----kesaaakferqhmdsgnssSSNYCNLMCC--CRKMT-----OGKCKPVNTHVHESLADVAVCS--QKKVTckdggTnCYOSKSTMRITDRETgSSKY-NCAAYKTQVEKHIIVACGGkpsVPVHFdasv-----</p> <p><b>SARST:</b> aliSize=105 (resi) RMSD=9.81 (Å)<br/> hmqpehve---RYKNFLNQHVGPDM---VQRCSSEI GpnNRKI I l sgt DNGCKPVNTHILANKRLIKTVCGRAGSP-----GNMVRSNQPFVVKVNLNNGERHPYCEYRGTRSTRYI VLKCEE--VHYhedevn<br/> -----kesAAAKFERQHMDSGNssSSNYCNLM-MCCRK-----MIOGKCKPVNTHVHESLADVAVCSQKKVTckdggTnCYOSKSTMRITDRETGSSKYENCAAYKTQVEKHIIVACGGKPSVpvhfdasv-----</p> <p><b>BLAST:</b> aliSize=40 (resi) iden=19.35% (24/124) simi=32.26% (40/124)<br/> hmqpehvkerknflnqhvgpdmvqrncseigpnnrki l sgt-----DNGCKPVNTHILANKRLIKTVCGR----AGSPGGMVRSNQPFVVKVNLNNGERHPYCEYRGTRSTRYI VLKCEE--EEGWPVHY----hedevn<br/> -----kesaaakferqhmdsgnsssnycnlmccrkmIOGKCKPVNTHVHESLADVAVCSQkkvtCKDGGTnCYOSKSTMRITDRETGSSKYENCAAYKTQVEKHIIVACggKPSVpVHFdasv-----</p> <p><b>Proposed:</b> aliSize=109 (resi) RMSD=1.69 (Å)<br/> hmqpehv-KERYKNFLNQHVGPDMsV-Q---RCNSEI GpnNRKI I l sgt DNGCKPVNTHILANKRLIKTVCGraGSPOG-----N-MVRSNQPFVVKVNLN-NGERHPYCEYRGTRSTRYI VLKCEE--GWPVHYHED-evn<br/> -----kESAAAKFERQHMDSGNssSSsnYCNLMCC--CRKMT-----OGKCKPVNTHVHESLADVAVCS--QKKVTckdggTnCYOSKSTMRITDRETgSSKYP-NCAAYKTQVEKHIIVACGGkpsVPVHFdasv---</p>                                    |
| 860 | <p>2vq8A<br/>(128)</p> <hr/> <p>3bcoA<br/>(124)</p> | N | 22.58 | <p><b>TM-align:</b> aliSize=93 (resi) RMSD=1.82 (Å)<br/> hmqpehvkerknflnqhvgpdm-----SVQRCSSEI GpnNRKI I l sgt DNGCKPVNTHILANKRLIKTVCGraGSPOG-----N-MVRSNQPFVVKVNLN-NGERHPYCEYRGTRSTRYI VLKCEE--GWPVHYHEDevn-<br/> -----kesaaakferqhmdsgnssSSNYCNQMMC--CRKMT-----OGKCKPVNTHVHESLADVAVCS--QKKVTckdggTnCYOSKSTMRITDRETgSSKYP-NCAAYKTQVEKHIIVACGGkpsVPVHFdasv-----</p> <p><b>SARST:</b> aliSize=102 (resi) RMSD=9.51 (Å)<br/> hmqpehve---RYKNFLNQHV---PDMsVQRCSSEI GpnNRKI I l sgt DNGCKPVNTHILANKRLIKTVCGRAGSP-----GNMVRSNQPFVVKVNLnGE--RHPYCEYRGTRSTRYI VLKCEE--VHYhedevn<br/> -----kesAAAKFERQHMDsgnASS-SSNYCNQM-MCCRK-----MIOGKCKPVNTHVHESLADVAVCSQKKVTckdggTnCYOSKSTMRITDRETgSSKYP-NCAAYKTQVEKHIIVACGGKPSVpvhfdasv-----</p> <p><b>BLAST:</b> aliSize=40 (resi) iden=19.35% (24/124) simi=32.26% (40/124)<br/> hmqpehvkerknflnqhvgpdmvqrncseigpnnrki l sgt-----DNGCKPVNTHILANKRLIKTVCGR----AGSPGGMVRSNQPFVVKVNLNNGERHPYCEYRGTRSTRYI VLKCEE--EEGWPVHY----hedevn<br/> -----kesaaakferqhmdsgnsssnycnqmccrkmIOGKCKPVNTHVHESLADVAVCSQkkvtCKDGGTnCYOSKSTMRITDRETGSSKYENCAAYKTQVEKHIIVACggKPSVpVHFdasv-----</p> <p><b>Proposed:</b> aliSize=109 (resi) RMSD=1.78 (Å)<br/> hmqpehv-KERYKNFLNQHVGPDM-MSVQ---RCNSEI GpnNRKI I l sgt DNGCKPVNTHILANKRLIKTVCGraGSPOG-----N-MVRSNQPFVVKVNLN-NGERHPYCEYRGTRSTRYI VLKCEE--GWPVHYHED-evn<br/> -----kESAAAKFERQHMDsgnSASSsnYCNQMMC--CRKMT-----OGKCKPVNTHVHESLADVAVCS--QKKVTckdggTnCYOSKSTMRITDRETgSSKYP-NCAAYKTQVEKHIIVACGGkpsVPVHFdasv---</p>                              |

|     |                                                     |   |       |                                                                                                                                                                                                                                                                                                                                                                                                                                                                                                                                                                                                                                                                                                                                                                                                                                                             |
|-----|-----------------------------------------------------|---|-------|-------------------------------------------------------------------------------------------------------------------------------------------------------------------------------------------------------------------------------------------------------------------------------------------------------------------------------------------------------------------------------------------------------------------------------------------------------------------------------------------------------------------------------------------------------------------------------------------------------------------------------------------------------------------------------------------------------------------------------------------------------------------------------------------------------------------------------------------------------------|
| 861 | <p>2vq8A<br/>(128)</p> <hr/> <p>1y94A<br/>(124)</p> | N | 22.58 | <p><b>TM-align:</b> aliSize=92 (resi) RMSD=1.75 (Å)<br/> hmqpehvkeryknflnqhvgpdm-----SVQRCSSEIGpNRRITLsgtDNGCKPVNTFVHESLADVKAVCS--QKVTckdggTnCYQSKSTMRTDRETgSSK-YP-NCAKTTQVEKHIIVACGGKpSVPVHFDAS---v</p> <p><b>SARST:</b> aliSize=104 (resi) RMSD=9.43 (Å)<br/> hmqpehvkeryknflnqhvgpdm-----SVQRCSSEIGpNRRITLsgtDNGCKPVNTFVHESLADVKAVCS--QKVTckdggTnCYQSKSTMRTDRETgSSK-YP-NCAKTTQVEKHIIVACGGKpSVPVHFDAS---v</p> <p><b>BLAST:</b> aliSize=49 (resi) iden=25.00% (31/124) simi=39.52% (49/124)<br/> hmqpehvkeryknflnqhvgpdm-----SVQRCSSEIGpNRRITLsgtDNGCKPVNTFVHESLADVKAVCS--QKVTckdggTnCYQSKSTMRTDRETgSSK-YP-NCAKTTQVEKHIIVACGGKpSVPVHFDAS---v</p> <p><b>Proposed:</b> aliSize=109 (resi) RMSD=1.76 (Å)<br/> hmqpehvkeryknflnqhvgpdm-----SVQRCSSEIGpNRRITLsgtDNGCKPVNTFVHESLADVKAVCS--QKVTckdggTnCYQSKSTMRTDRETgSSK-YP-NCAKTTQVEKHIIVACGGKpSVPVHFDAS---v</p> |
| 862 | <p>1kvzA<br/>(107)</p> <hr/> <p>1lbgA<br/>(124)</p> | N | 24.30 | <p><b>TM-align:</b> aliSize=85 (resi) RMSD=2.50 (Å)<br/> mqdwa t f k k k h l t d t w -----D-VDCDNLMPSTSLFD---CKDKNTFIYSLPGPVKALCRGVIFSA-----SADVLSNSEFYLAECNVKPRK---PKYKLLKSSNRICTRCEH--ELPVHAGVGicp</p> <p><b>SARST:</b> aliSize=99 (resi) RMSD=10.44 (Å)<br/> mqdwa t f k k k h l t d t w -----D-VDCDNLMPSTSLFD---CKDKNTFIYSLPGPVKALCRGVIFSA-----SADVLSNSEFYLAECNVKPRK---PKYKLLKSSNRICTRCEH--ELPVHAGVGicp</p> <p><b>BLAST:</b> aliSize=34 (resi) iden=21.50% (23/107) simi=31.78% (34/107)<br/> mqdwa t f k k k h l t d t w -----D-VDCDNLMPSTSLFD---CKDKNTFIYSLPGPVKALCRGVIFSA-----SADVLSNSEFYLAECNVKPRK---PKYKLLKSSNRICTRCEH--ELPVHAGVGicp</p> <p><b>Proposed:</b> aliSize=99 (resi) RMSD=2.11 (Å)<br/> MODWA t f k k k h l t d t w -----D-VDCDNLMPSTSLFD---CKDKNTFIYSLPGPVKALCRGVIFSA-----SADVLSNSEFYLAECNVKPRK---PKYKLLKSSNRICTRCEH--ELPVHAGVGicp</p>  |
| 863 | <p>1kvzA<br/>(107)</p> <hr/> <p>1y92B<br/>(124)</p> | N | 23.36 | <p><b>TM-align:</b> aliSize=85 (resi) RMSD=2.41 (Å)<br/> mqdwa t f k k k h l t d t w -----D-VDCDNLMPSTSLFD---CKDKNTFIYSLPGPVKALCRGVIFSA-----SADVLSNSEFYLAECNVKPRK---PKYKLLKSSNRICTRCEH--ELPVHAGVGicp</p> <p><b>SARST:</b> aliSize=81 (resi) RMSD=3.45 (Å)<br/> mqdwa t f k k k h l t d t w -----D-VDCDNLMPSTSLFD---CKDKNTFIYSLPGPVKALCRGVIFSA-----SADVLSNSEFYLAECNVKPRK---PKYKLLKSSNRICTRCEH--ELPVHAGVGicp</p> <p><b>BLAST:</b> aliSize=36 (resi) iden=21.50% (23/107) simi=33.64% (36/107)<br/> mqdwa t f k k k h l t d t w -----D-VDCDNLMPSTSLFD---CKDKNTFIYSLPGPVKALCRGVIFSA-----SADVLSNSEFYLAECNVKPRK---PKYKLLKSSNRICTRCEH--ELPVHAGVGicp</p> <p><b>Proposed:</b> aliSize=98 (resi) RMSD=2.04 (Å)<br/> MODWA t f k k k h l t d t w -----D-VDCDNLMPSTSLFD---CKDKNTFIYSLPGPVKALCRGVIFSA-----SADVLSNSEFYLAECNVKPRK---PKYKLLKSSNRICTRCEH--ELPVHAGVGicp</p>   |



|     |                                                     |   |       |                                                                                                                                                                                                                                                                                                                                                                                                                                                                                                                                                                                                                                                                                                                                                                                                                                                                                                                                                                                                                                                                                                                                                                                                                                                                                                                                                                          |
|-----|-----------------------------------------------------|---|-------|--------------------------------------------------------------------------------------------------------------------------------------------------------------------------------------------------------------------------------------------------------------------------------------------------------------------------------------------------------------------------------------------------------------------------------------------------------------------------------------------------------------------------------------------------------------------------------------------------------------------------------------------------------------------------------------------------------------------------------------------------------------------------------------------------------------------------------------------------------------------------------------------------------------------------------------------------------------------------------------------------------------------------------------------------------------------------------------------------------------------------------------------------------------------------------------------------------------------------------------------------------------------------------------------------------------------------------------------------------------------------|
| 864 | <p>1kvzA<br/>(107)</p> <hr/> <p>3bcoA<br/>(124)</p> | N | 24.30 | <p><b>TM-align:</b> aliSize=85 (resi) RMSD=2.50 (Å)<br/> mqdwatfkkkhltdtw-----D-VDCDNLMPSTSLFD---CKDKNTFIYSLPGPVKALCRGVIF-----SADVLSNSEFYLAECNVKPRKP---CKYKLLKSSNRICTRCEH--ELPVHAGVGicp<br/> -----kesaaakferqhmdsgnsasssNYCNQMMCCRKMTqgkCKPVNTFVHESLADVKAVCSQ---kkvtckdgtNCYQSKSTMRITDCRETGSSKypnCAKTTQVEKHIIVACGGkpSVPVHEDASV---</p> <p><b>SARST:</b> aliSize=94 (resi) RMSD=11.72 (Å)<br/> mqd---WATKKKHLTDWD--VDCDNLMPSTSLFDC-----DKNTFIYSLPGPVKALCRGVIFSA-----DVLNSEFYLAECNVK---PRKPCKYKLLKSS---SNRIRCEHELPHVF-agvgicp<br/> ---kesaAAKERQHMDSGNSASSSNYCNQMMCCRKMTqgkCKPVNTFVHESLADVKAVCSQKQKVTCKdgtqncYOQSKSTMRITDCRETgsskYpNC-AKTTQVEKHIIVACGG--KPSVPVHFDASv-----</p> <p><b>BLAST:</b> aliSize=36 (resi) iden=21.50% (23/107) simi=33.64% (36/107)<br/> mqdwatfkkkhltdtwdvdcdnlmptslfd-----CKDKNTFIYSLPGPVKALCRGVIFSAVLSN-----SEFYLAECNV--KPRKP--CKYKLLKSSNRICTRCE--EHELPHVF-----agvgicp<br/> -----kesaaakferqhmdsgnsasssnycnqmmccrkmmtqgkCKPVNTFVHESLADVKAVCSQKQKVTCKGQTCyqskSTMRITDCRETgSSKYPnCAKTTQVEKHIIVACGGKPSVPVHEDASv-----</p> <p><b>Proposed:</b> aliSize=99 (resi) RMSD=2.10 (Å)<br/> MOD-WATKKKHLTDWDV---D-CDNLMPST-SLFD--CKDKNTFIYSLPGPVKALCR-----gvifSADVLSNSEFYLAECNVKPRKP---PKYKLLKSSNRICTRCE-H-ELPVHAGVGicp<br/> KESAAAKERQHMDSGNSASSSNYCNQMMCCRKMTqgkCKPVNTFVHESLADVKAVCSqkvtckdgt----NCYQSKSTMRITDCRETGSSKypnCAKTTQVEKHIIVACGGkpSVPVHEDASV---</p> |
| 865 | <p>1kvzA<br/>(107)</p> <hr/> <p>1y94A<br/>(124)</p> | N | 24.30 | <p><b>TM-align:</b> aliSize=85 (resi) RMSD=2.47 (Å)<br/> mqdwatfkkkhltdtw-----D-VDCDNLMPSTSLFD---CKDKNTFIYSLPGPVKALCRGVIF-----SADVLSNSEFYLAECNVKPRKP---CKYKLLKSSNRICTRCEH--ELPVHAGVGicp<br/> -----kesaaakferqhmdsstsaasSsNYCNLMCCRKMTqgkCKPVNTFVHESLADVKAVCSQ---kkvtckdgtNCYQSKSTMRITDCRETGSSKypnCAKTTQVEKHIIVACGGkpSVPVHEDASV---</p> <p><b>SARST:</b> aliSize=99 (resi) RMSD=10.32 (Å)<br/> mqd---WATKKKHLTDWD-VDCDNLMPSTSLFD--CKDKNTFIYSLPGPVKALCRGVIFSA-----DVLNSEFYLAECNVK---PRKPCKYKLLKSSNRICTRCEH--ELPVHAGV-gicp<br/> ---kesaAAKERQHMDSSTSAASSSNYCNLMCCRKMTQgkCKPVNTFVHESLADVKAVCSQKQKVTCKdgtqncYOQSKSTMRITDCRETgsskYpNC-AKTTQVEKHIIVACGGkpSVPVHEDASv-----</p> <p><b>BLAST:</b> aliSize=36 (resi) iden=21.50% (23/107) simi=33.64% (36/107)<br/> mqdwatfkkkhltdtwdvdcdnlmptslfd-----CKDKNTFIYSLPGPVKALCRGVIFSAVLSN-----SEFYLAECNV--KPRKP--CKYKLLKSSNRICTRCE--EHELPHVF-----agvgicp<br/> -----kesaaakferqhmdsstsaasssnycnllmccrkmmtqgkCKPVNTFVHESLADVKAVCSQKQKVTCKGQTCyqskSTMRITDCRETgSSKYPnCAKTTQVEKHIIVACGGKPSVPVHEDASv-----</p> <p><b>Proposed:</b> aliSize=100 (resi) RMSD=2.15 (Å)<br/> MOD-WATKKKHLTDWDV---D-CDNLMPST-SLFD--CKDKNTFIYSLPGPVKALCR-----gvifSADVLSNSEFYLAECNVKPRKP---CKYKLLKSSNRICTRCEH--ELPVHAGVGicp<br/> KESAAAKERQHMDSSTSAASSSNYCNLMCCRKMTqgkCKPVNTFVHESLADVKAVCSqkvtckdgt----TNCYQSKSTMRITDCRETGSSKypnCAKTTQVEKHIIVACGGkpSVPVHEDASV---</p>    |
| 866 | <p>1pu3A<br/>(105)</p> <hr/> <p>1lbgA<br/>(124)</p> | N | 23.81 | <p><b>TM-align:</b> aliSize=84 (resi) RMSD=2.25 (Å)<br/> mqdwltfqkhhinttr-----D-VDCDNLSTNLFH---CKDKNTFIYSRPEPVKAI CKGIIA-----SKNVLTTSEFYLSDCNVISRP---CKYKLLKSTNKFCVTCEN--QAPVHFGVgsc<br/> -----kesaaakferqhmdsgnspssSsNYCNLMCCRKMTqgkCKPVNTFVHESLADVKAVCSQ---kkvtckngqTNCYQSKSTMRITDCRETGSSKypnCAKTTQVEKHIIVACGGkpSVPVHEDASV---</p> <p><b>SARST:</b> aliSize=99 (resi) RMSD=10.08 (Å)<br/> mqd---WLTQKKHINTRDVD-----CDNLSTNLFHCK--DKNTFIYSRPEPVKAI CKGIIASK-----NVLTTSEFYLSDCNVIS--RPCK--YKLLKSTNKFCVTCEN--QAPVHFGV-gsc<br/> ---kesaAAKERQHMDSGNSPSSSNYCNLMCCRKMTQgkCKPVNTFVHESLADVKAVCSQKQKVTCKngqtnCYQSKSTMRITDCRETgsskYpncayKTTQVEKHIIVACGGkpSVPVHEDASv---</p> <p><b>BLAST:</b> aliSize=37 (resi) iden=25.71% (27/105) simi=35.24% (37/105)<br/> mqdwltfqkhhintrdvcdnilstnlfh-----CKDKNTFIYSRPEPVKAI CKGIIASKVLT-----SEFYLSDCNVIS--SR--CKYKLLKSTNKFCVTCEN--QAPVH-----vgvgsc<br/> -----kesaaakferqhmdsgnspsssnycnllmccrkmmtqgkCKPVNTFVHESLADVKAVCSQKQKVTCKGQTCyqskSTMRITDCRETgsskYpncayKTTQVEKHIIVACGGKPSVPVHEDASv-----</p> <p><b>Proposed:</b> aliSize=98 (resi) RMSD=1.82 (Å)<br/> -MODWLTQKKHINT-RDV---D-CDNLST-NLFH--CKDKNTFIYSRPEPVKAI CK-----giasKNVLTTSEFYLSDCNVISRP---CKYKLLKSTNKFCVTCEN--QAPVHFGVgsc<br/> KESAAAKERQHMDSGNSPSSSNYCNLMCCRKMTqgkCKPVNTFVHESLADVKAVCSqkvtckngq----NCYQSKSTMRITDCRETGSSKypnCAKTTQVEKHIIVACGGkpSVPVHEDASV---</p>                   |

|     |                |   |       |                                                                                                                                                                                                                                                                                                                                                                                                                                                                                                                                                                                                                                                                                                                                                                                                                                                                                                                                                                                                                                                                                                                                                                                                                                                                                                                                                                                                                      |
|-----|----------------|---|-------|----------------------------------------------------------------------------------------------------------------------------------------------------------------------------------------------------------------------------------------------------------------------------------------------------------------------------------------------------------------------------------------------------------------------------------------------------------------------------------------------------------------------------------------------------------------------------------------------------------------------------------------------------------------------------------------------------------------------------------------------------------------------------------------------------------------------------------------------------------------------------------------------------------------------------------------------------------------------------------------------------------------------------------------------------------------------------------------------------------------------------------------------------------------------------------------------------------------------------------------------------------------------------------------------------------------------------------------------------------------------------------------------------------------------|
| 867 | 1pu3A<br>(105) | N | 23.81 | <p><b>TM-align:</b> aliSize=85 (resi) RMSD=2.29 (Å)<br/> mqdwl t f q k k h i t n t r -----D-VDCDNILSTNLFH---CKDKNTFIYSRPEPVKAICKG-Iia-----SKNVLTTSEFYLSDCNVTSRP----CKYKLLKSTNKFCVTE-N-QAPVHFVGVGsc<br/> -----kesaaakferqhmdsgnsasssNYCNLMCCRKMTqgkCKPVNTFVHESLADVKAVCSQkK--vtckdggTNCYQSKTMRITDCRETGSSkypnCAKTTQVEKHIIVACGgkPSPVPHEDASV--</p> <p><b>SARST:</b> aliSize=83 (resi) RMSD=4.48 (Å)<br/> mqdwl t f q k k h i t n t r d v d -----CDNILSTNLFHCKDKNTFIYSRPEPVKAICK-----KGI IASKNVLTTSEFYLSDCNVTSRP----CKYKLLKSTNKFCVTE-N-QAPVHFVGV-gsc<br/> -----kesaaakferqhmdsgnsasssnycnlmmccrkmTQgkCKPVNTFVHESLADVKAVCSqkvtCKDGTNCYQSKTMRITDCRETGSSkypnCAKTTQVEKHIIVACGgkPSPVPHEDASV--</p> <p><b>BLAST:</b> aliSize=37 (resi) iden=24.76% (26/105) simi=35.24% (37/105)<br/> mqdwl t f q k k h i t n t r d v d c d n i l s t n l f h -----CKDKNTFIYSRPEPVKAICK-KGI IASKNVLTT-----SEFYLSDCNVT--SR--P--CKYKLLKSTNKFCVTE-ENQ--APVHF-----v g v g s c<br/> -----kesaaakferqhmdsgnsasssnycnlmmccrkmTqgkCKPVNTFVHESLADVKAVCSQKVTCKDGTncyqskTMRITDCRETGSSkypnCAKTTQVEKHIIVACGgkPSPVPHEDASV-----</p> <p><b>Proposed:</b> aliSize=98 (resi) RMSD=1.77 (Å)<br/> -MQDWLTQKKHIT-NTRD---VD---CDNILSTNLFH---CKDKNTFIYSRPEPVKAICK-----giasKNVLTTSEFYLSDCNVTSRP----CKYKLLKSTNKFCVTE-N-QAPVHFVGVGsc<br/> kESAAAKFEROHMDSGNSASSsNYCNLMCCRKMTqgkCKPVNTFVHESLADVKAVCSqkvtckdgt-----NCYQSKTMRITDCRETGSSkypnCAKTTQVEKHIIVACGgkPSPVPHEDASV--</p> |
|     | 1y92B<br>(124) |   |       |                                                                                                                                                                                                                                                                                                                                                                                                                                                                                                                                                                                                                                                                                                                                                                                                                                                                                                                                                                                                                                                                                                                                                                                                                                                                                                                                                                                                                      |
| 868 | 1pu3A<br>(105) | N | 23.81 | <p><b>TM-align:</b> aliSize=84 (resi) RMSD=2.21 (Å)<br/> mqdwl t f q k k h i t n t r -----D-VDCDNILSTNLFH---CKDKNTFIYSRPEPVKAICKGii-----SKNVLTTSEFYLSDCNVTSRP----CKYKLLKSTNKFCVTE--NQAPVHFVGVGsc<br/> -----kesaaakferqhmdsgnsasssNYCNQMMCCRKMTqgkCKPVNTFVHESLADVKAVCSQ---kkvtckdggTNCYQSKTMRITDCRETGSSkypnCAKTTQVEKHIIVACGgkPSPVPHEDASV--</p> <p><b>SARST:</b> aliSize=99 (resi) RMSD=9.93 (Å)<br/> mqd---WLTQKKHITNT---RDVD---CDNILSTNLFHC-----CKDKNTFIYSRPEPVKAICKGIIAS-----KNVLTTSEFYLSDCNVTIS--RPC--KYKLLKSTNKFCVTE-N-QAPVHFVGV-gsc<br/> ---kesAAKFEROHMDSGNSASSsNYCNQMMCCRKMTqgkCKPVNTFVHESLADVKAVCSQKVTCKdgtTNCYQSKTMRITDCRETGSSkypnCAKTTQVEKHIIVACGgkPSPVPHEDASV--</p> <p><b>BLAST:</b> aliSize=37 (resi) iden=24.76% (26/105) simi=35.24% (37/105)<br/> mqdwl t f q k k h i t n t r d v d c d n i l s t n l f h -----CKDKNTFIYSRPEPVKAICK-KGI IASKNVLTT-----SEFYLSDCNVT--SR--P--CKYKLLKSTNKFCVTE-ENQ--APVHF-----v g v g s c<br/> -----kesaaakferqhmdsgnsasssnycnqmmccrkmTqgkCKPVNTFVHESLADVKAVCSQKVTCKDGTncyqskTMRITDCRETGSSkypnCAKTTQVEKHIIVACGgkPSPVPHEDASV-----</p> <p><b>Proposed:</b> aliSize=97 (resi) RMSD=1.68 (Å)<br/> -MQDWLTQKKHITNTRD---D---CDNILST-nLFH---CKDKNTFIYSRPEPVKAICK-----giasKNVLTTSEFYLSDCNVTSRP----CKYKLLKSTNKFCVTE--NQAPVHFVGVGsc<br/> kESAAAKFEROHMDSGNSASSsnyCNQMMCCR-KMTqgkCKPVNTFVHESLADVKAVCSqkvtckdgt-----NCYQSKTMRITDCRETGSSkypnCAKTTQVEKHIIVACGgkPSPVPHEDASV--</p>         |
|     | 3bcoA<br>(124) |   |       |                                                                                                                                                                                                                                                                                                                                                                                                                                                                                                                                                                                                                                                                                                                                                                                                                                                                                                                                                                                                                                                                                                                                                                                                                                                                                                                                                                                                                      |
| 869 | 1pu3A<br>(105) | N | 23.81 | <p><b>TM-align:</b> aliSize=84 (resi) RMSD=2.18 (Å)<br/> mqdwl t f q k k h i t n t r -----D-VDCDNILSTNLFH---CKDKNTFIYSRPEPVKAICKGii-----SKNVLTTSEFYLSDCNVTSRP----CKYKLLKSTNKFCVTE-N-QAPVHFVGVGsc<br/> -----kesaaakferqhmdsstsaasSsNYCNLMCCRKMTqgkCKPVNTFVHESLADVKAVCSQ---kkvtckdggTNCYQSKTMRITDCRETGSSkypnCAKTTQVEKHIIVACGgkPSPVPHEDASV--</p> <p><b>SARST:</b> aliSize=99 (resi) RMSD=10.34 (Å)<br/> mqd---WLTQKKHITNTRD---D---CDNILSTNLFHC---CKDKNTFIYSRPEPVKAICK-----KGI IASKNVLTTSEFYLSDCNVTIS--RPC--KYKLLKSTNKFCVTE-N-QAPVHFVGV-gsc<br/> ---kesAAKFEROHMDSSTSAAsSNYCNLMCCRKMTQgkCKPVNTFVHESLADVKAVCSqkvtCKDGTNCYQSKTMRITDCRETGSSkypnCAKTTQVEKHIIVACGgkPSPVPHEDASV--</p> <p><b>BLAST:</b> aliSize=37 (resi) iden=24.76% (26/105) simi=35.24% (37/105)<br/> mqdwl t f q k k h i t n t r d v d c d n i l s t n l f h -----CKDKNTFIYSRPEPVKAICK-KGI IASKNVLTT-----SEFYLSDCNVT--SR--P--CKYKLLKSTNKFCVTE-ENQ--APVHF-----v g v g s c<br/> -----kesaaakferqhmdsstsaassnycnlmmccrkmTqgkCKPVNTFVHESLADVKAVCSQKVTCKDGTncyqskTMRITDCRETGSSkypnCAKTTQVEKHIIVACGgkPSPVPHEDASV-----</p> <p><b>Proposed:</b> aliSize=97 (resi) RMSD=1.63 (Å)<br/> -MQDWLTQKKHITNT-RDV---D---CDNILST-nLFH---CKDKNTFIYSRPEPVKAICK-----giasKNVLTTSEFYLSDCNVTSRP----CKYKLLKSTNKFCVTE-N-QAPVHFVGVGsc<br/> kESAAAKFEROHMDSSTSAAsSNYCNLMCCR-KMTqgkCKPVNTFVHESLADVKAVCSqkvtckdgt-----NCYQSKTMRITDCRETGSSkypnCAKTTQVEKHIIVACGgkPSPVPHEDASV--</p>          |
|     | 1y94A<br>(124) |   |       |                                                                                                                                                                                                                                                                                                                                                                                                                                                                                                                                                                                                                                                                                                                                                                                                                                                                                                                                                                                                                                                                                                                                                                                                                                                                                                                                                                                                                      |

|     |                                             |   |       |                                                                                                                                                                                                                                                                                                                                                                                                                                                                                                                                                                                                                                                                                                                                                                                                                                                                                                                                                                                                                                                                                                                                                                                                                                                                                                                                                                                                                                                   |
|-----|---------------------------------------------|---|-------|---------------------------------------------------------------------------------------------------------------------------------------------------------------------------------------------------------------------------------------------------------------------------------------------------------------------------------------------------------------------------------------------------------------------------------------------------------------------------------------------------------------------------------------------------------------------------------------------------------------------------------------------------------------------------------------------------------------------------------------------------------------------------------------------------------------------------------------------------------------------------------------------------------------------------------------------------------------------------------------------------------------------------------------------------------------------------------------------------------------------------------------------------------------------------------------------------------------------------------------------------------------------------------------------------------------------------------------------------------------------------------------------------------------------------------------------------|
| 870 | <p>1un4A (119)</p> <hr/> <p>1lbgA (124)</p> | N | 32.77 | <p><b>TM-align:</b> aliSize=97 (resi) RMSD=1.87 (Å)<br/> nsrythfl tqhyd <b>akpq</b>-----GRDDRYCESIMRRRGLTS-PCKDINTFIHGKRSIKAIENknGNPHR---EN-LRI SKSSFOVIAAKLHGSPWPPOQYRAIAGFRNVVACE-N-GLPVHLQsIFr<br/> -----kesaaakferqhmd <b>sgnspSSSS</b>SNYCNLMCCCKMTQgKCKPVNTEVHESLADVKAVCS---QKKVTckngQTnCYQSKSTMRIIDRETGSSKYPNCAKTTQVEKHIIVACGgKpSVPVHFDA-SV-</p> <p><b>SARST:</b> aliSize=104 (resi) RMSD=10.05 (Å)<br/> ns---RYTHLTQHYD<b>AKPOGRD</b>drYCESIMRRRGLTS-PCKDINTFIHGKRSIKAIENknGNPH-----RENLRISKSSFOVIAAKLHGSPWP-PCQYRAIAGFRNVVACEN--GLPVHL----dqsifr<br/> --kesAAAKFERQHMD<b>sgnspSSSS</b>SN---YCNLMCCCKMTQgKCKPVNTEVHESLADVKAVC---SOKKVtckngQTnCYQSKSTMRIIDRETGSSKYPNCAKTTQVEKHIIVACGGkpSVPVHFdasv-----</p> <p><b>BLAST:</b> aliSize=65 (resi) iden=35.29% (42/119) simi=54.62% (65/119)<br/> nsryth-----LTQHYDA<b>-KPOGRD</b>drYCESIMRRRGLTS-PCKDINTFIHGKRSIKAIEN-----KNGnphRENLRISKSSFOVIAAKLHGSPWPPOQYRAIAGFRNVVAC--ENGLPVHLQSIfr<br/> -----kesaaakFERQHMD<b>SgnSPSSSS</b>SN-YCNLMCCCKMTQgKCKPVNTEVHESLADVKAVCSQkvtckng---QTnCYQSKSTMRIIDRETGSSKYPNCAKTTQVEKHIIVACggKPSVPVHFDA-SV--</p> <p><b>Proposed:</b> aliSize=111 (resi) RMSD=1.37 (Å)<br/> n--SRYTHLTQHYDA<b>K-POGRD</b>DRYCESIMRRRGLTS-PCKDINTFIHGKRSIKAIENknGNPHR---EN-LRI SKSSFOVIAAKLHGSPWPPOQYRAIAGFRNVVACE-N-GLPVHLQsI-fr<br/> -keSAAAKFERQHMD<b>SGnsPSS-SSNYCNLMCCCKMTQgKCKPVNTEVHESLADVKAVCS</b>---QKKVTckngQTnCYQSKSTMRIIDRETGSSKYPNCAKTTQVEKHIIVACGgKpSVPVHFDA-Sv--</p> |
| 871 | <p>1un4A (119)</p> <hr/> <p>1y92B (124)</p> | N | 30.25 | <p><b>TM-align:</b> aliSize=97 (resi) RMSD=1.94 (Å)<br/> nsrythfl tqhyd <b>akpq</b>-----GRDDRYCESIMRRRGLTS-PCKDINTFIHGKRSIKAIENknGNPHR---E-N-LRI SKSSFOVIAAKLHGSPWPPOQYRAIAGFRNVVACEN--GLPVHLQsIFr<br/> -----kesaaakferqhmd <b>sgnsaSSSS</b>SNYCNLMCCCKMTQgKCKPVNTEVHESLADVKAVCS---QKKVTckdgQTnCYQSKSTMRIIDRETGSSKYPNCAKTTQVEKHIIVACGGkpSVPVHFDA-SV-</p> <p><b>SARST:</b> aliSize=108 (resi) RMSD=10.00 (Å)<br/> ns---RYTHLTQHYD<b>AKPOGRD</b>DRYCESIMRRRGLTS-PCKDINTFIHGKRSIKAIENknGNPHR---EN-LRI SKSSFOVIAAKLHGSPWPPOQYRAIAGFRNVVACENG--LPVHL----dqsifr<br/> --kesAAAKFERQHMD<b>sgnsaSSSS</b>SNYCNLMCCCKMTQgKCKPVNTEVHESLADVKAVC---SOKKVtckdgQTnCYQSKSTMRIIDRETGSSKYPNCAKTTQVEKHIIVACGGKpsVPVHFdasv-----</p> <p><b>BLAST:</b> aliSize=61 (resi) iden=32.77% (39/119) simi=51.26% (61/119)<br/> nsryth-----LTQHYDA<b>KPOGRD</b>DRYCESIMRRRGLTS-PCKDINTFIHGKRSIKAIENknGNPHRENLRISKSSFOVIAAKLHGSPWPPOQYRAIAGFRNVVAC--ENGLPVHLQSIfr<br/> -----kesaaakFERQHMD<b>SgnSaSSSS</b>SNYCNLMCCCKMTQgKCKPVNTEVHESLADVKAVCSQkvtckdgQTnCYQSKSTMRIIDRETGSSKYPNCAKTTQVEKHIIVACggKPSVPVHFDA-SV--</p> <p><b>Proposed:</b> aliSize=111 (resi) RMSD=1.35 (Å)<br/> n--SRYTHLTQHYDA<b>KPOGRD</b>DRYCESIMRRRGLTS-PCKDINTFIHGKRSIKAIENknGNPHR---E-N-LRI SKSSFOVIAAKLHGSPWPPOQYRAIAGFRNVVACEN--GLPVHLQsI-fr<br/> -keSAAAKFERQHMD<b>SGnsaSSSS</b>SNYCNLMCCCKMTQgKCKPVNTEVHESLADVKAVCS---QKKVTckdgQTnCYQSKSTMRIIDRETGSSKYPNCAKTTQVEKHIIVACGGkpSVPVHFDA-Sv--</p>              |
| 872 | <p>1un4A (119)</p> <hr/> <p>3bcoA (124)</p> | N | 31.93 | <p><b>TM-align:</b> aliSize=97 (resi) RMSD=1.95 (Å)<br/> nsrythfl tqhyd <b>akpq</b>-----GRDDRYCESIMRRRGLTS-PCKDINTFIHGKRSIKAIENknGNPHR---EN-LRI SKSSFOVIAAKLHGSPWPPOQYRAIAGFRNVVACE-N-GLPVHLQsIFr<br/> -----kesaaakferqhmd <b>sgnsaSSSS</b>SNYCNMQMCCCKMTQgKCKPVNTEVHESLADVKAVCS---QKKVTckdgQTnCYQSKSTMRIIDRETGSSKYPNCAKTTQVEKHIIVACGgKpSVPVHFDA-SV-</p> <p><b>SARST:</b> aliSize=107 (resi) RMSD=10.25 (Å)<br/> ns---RYTHLTQHYD<b>AKPOGRD</b>DRYCESIMRRRGLTS-PCKDINTFIHGKRSIKAIENknGNPH-----RENLRISKSSFOVIAAKLHGSPWPPOQYRAIAGFRNVVACENGLPVHL----dqsifr<br/> --kesAAAKFERQHMD<b>SGNSASSSS</b>SNYCNMQMCCCKMTQgKCKPVNTEVHESLADVKAVC---SOKKVtckdgQTnCYQSKSTMRIIDRETGSSKYPNCAKTTQVEKHIIVACG-GKPSVPVhfdasv-----</p> <p><b>BLAST:</b> aliSize=61 (resi) iden=32.77% (39/119) simi=51.26% (61/119)<br/> nsryth-----LTQHYDA<b>KPOGRD</b>DRYCESIMRRRGLTS-PCKDINTFIHGKRSIKAIENknGNPHRENLRISKSSFOVIAAKLHGSPWPPOQYRAIAGFRNVVAC--ENGLPVHLQSIfr<br/> -----kesaaakFERQHMD<b>SgnSaSSSS</b>SNYCNMQMCCCKMTQgKCKPVNTEVHESLADVKAVCSQkvtckdgQTnCYQSKSTMRIIDRETGSSKYPNCAKTTQVEKHIIVACggKPSVPVHFDA-SV--</p> <p><b>Proposed:</b> aliSize=112 (resi) RMSD=1.50 (Å)<br/> n--SRYTHLTQHYDA<b>KPOGRD</b>DRYCESIMRRRGLTS-PCKDINTFIHGKRSIKAIENknGNPHR---EN-LRI SKSSFOVIAAKLHGSPWPPOQYRAIAGFRNVVACE-N-GLPVHLQsI-fr<br/> -keSAAAKFERQHMD<b>SGNSASSs</b>SNYCNMQMCCCKMTQgKCKPVNTEVHESLADVKAVCS---QKKVTckdgQTnCYQSKSTMRIIDRETGSSKYPNCAKTTQVEKHIIVACGgKpSVPVHFDA-Sv--</p>              |

|     |                                               |   |       |                                                                                                                                                                                                                                                                                                                                                                                                                                                                                                                                                                                                                                                                                                                                                                                                                                                                                                                                                                                                                                                                                                                                                                                                                                                                                                                                                                                    |
|-----|-----------------------------------------------|---|-------|------------------------------------------------------------------------------------------------------------------------------------------------------------------------------------------------------------------------------------------------------------------------------------------------------------------------------------------------------------------------------------------------------------------------------------------------------------------------------------------------------------------------------------------------------------------------------------------------------------------------------------------------------------------------------------------------------------------------------------------------------------------------------------------------------------------------------------------------------------------------------------------------------------------------------------------------------------------------------------------------------------------------------------------------------------------------------------------------------------------------------------------------------------------------------------------------------------------------------------------------------------------------------------------------------------------------------------------------------------------------------------|
| 873 | <p>1un4A<br/>(119)</p> <p>1y94A<br/>(124)</p> | N | 31.09 | <p><b>TM-align:</b> aliSize=96 (resi) RMSD=1.91 (Å)<br/> nsrythfl tqhyd akpq-----GRDDRYCESIMRRRGLTSPCKDINTFIHGKRSIKAIENknGNPHR---E-N-LRI SKSSFOVIAKCLHGSPWPPQYRAIAGFRNVVACE-N-GLPVHLDQsIFr<br/> -----kesaaakferqhmdsstsaASSSNYCNLMCCCKMTQgKCKPVNTFVHESLADVKAVCS---QKKVTckdGqTnCYQSKSTMRIIDCRETgSSK-YPNIAKKTQVEKHIIVACGGkpSVPVHFDASV-</p> <p><b>SARST:</b> aliSize=107 (resi) RMSD=10.02 (Å)<br/> ns---RYTHLTOHYT--AKPOGRDDRYCESIMRRRGLTSPCKDINTFIHGKRSIKAIENknGNPHR---RENLRISKSSFOVIAKCLHGSPWPPQYRAIAGFRNVVACE--GLPVHLDQsIFr<br/> --kesAAAKFERQHMDsstsaASSSNYCNLMCCCKMTQgKCKPVNTFVHESLADVKAVCS---SOKKVTckdGqTnCYQSKSTMRIIDCRETgSSKYPNIAKKTQVEKHIIVACGGkpSVPVHFDASV----</p> <p><b>BLAST:</b> aliSize=61 (resi) iden=32.77% (39/119) simi=51.26% (61/119)<br/> nsryth-----LTOHYTAKPOGRDDRYCESIMRRRGLTSPCKDINTFIHGKRSIKAIENknGNPHRENLRISKSSFOVIAKCLHGSPWPPQYRAIAGFRNVVACE--ENGLPVHLDQsIFr<br/> -----kesaaakFERQHMDsstsaASSSNYCNLMCCCKMTQgKCKPVNTFVHESLADVKAVCSQKkVTCKDGQTnCYQSKSTMRIIDCRETgSSKYPNIAKKTQVEKHIIVACGGkpSVPVHFDASV--</p> <p><b>Proposed:</b> aliSize=111 (resi) RMSD=1.47 (Å)<br/> n--SRYTHLTOHYTAK--POGRDDRYCESIMRRRGLTSPCKDINTFIHGKRSIKAIENknGNPHR---E-N-LRI SKSSFOVIAKCLHGSPWPPQYRAIAGFRNVVACE--GLPVHLDQsI--fr<br/> -keSAAAKFERQHMDsstsaASSSNYCNLMCCCKMTQgKCKPVNTFVHESLADVKAVCS---QKKVTckdGqTnCYQSKSTMRIIDCRETgSSKYPNIAKKTQVEKHIIVACGGkpSVPVHFDASV--</p>               |
| 874 | <p>1rmfA<br/>(120)</p> <p>1lbgA<br/>(124)</p> | N | 43.33 | <p><b>TM-align:</b> aliSize=100 (resi) RMSD=1.52 (Å)<br/> mqdgmqrflrqhvhppeg-----GSDRYCNLMQRRKMTLYHCKRFNTFIHEDIWNIRSI CSTTNIQCKNGKMNCHEG--VVKVTDICRDTGSSRAPNCRIRAIASRRVVIACEINFPQVPVHFDG--<br/> -----kesaaakferqhmdsgnspSSSNYCNLMCCCKMTQgKCKPVNTFVHESLADVKAVCSQKKVTCKNGQTnCYQskSTMRIIDCRETGSSKYPNIAKKTQVEKHIIVACGGkpSVPVHFDASV</p> <p><b>SARST:</b> aliSize=112 (resi) RMSD=9.29 (Å)<br/> mqdg---MYQRFLROHVHPPEG-----GSDRYCNLMQRRKMTLYHCKRFNTFIHEDIWNIRSI CSTTNIQCKNGKMNCHEG--GVVKVTDICRDTGSSRAPNCRIRAIASRRVVIACEINFPQVPVHFDG--g<br/> ---kesAAAKFERQHMDSGNspSSSNYCNLMCCCKMTQgKCKPVNTFVHESLADVKAVCSQKKVTCKNGQTnCYQskSTMRIIDCRETGSSKYPNIAKKTQVEKHIIVACGGkpSVPVHFDASV--</p> <p><b>BLAST:</b> aliSize=76 (resi) iden=43.33% (52/120) simi=63.33% (76/120)<br/> mqdgmqr-----RFLROHVHPPEG-----GSDRYCNLMQRRKMTLYHCKRFNTFIHEDIWNIRSI CSTTNIQCKNGKMNCHEG--GVVKVTDICRDTGSSRAPNCRIRAIASRRVVIACEINFPQVPVHFDG--g<br/> -----kesaaakFERQHMDSGNspSSSNYCNLMCCCKMTQgKCKPVNTFVHESLADVKAVCSQKKVTCKNGQTnCYQskSTMRIIDCRETGSSKYPNIAKKTQVEKHIIVACGGkpSVPVHFDASV--</p> <p><b>Proposed:</b> aliSize=117 (resi) RMSD=1.41 (Å)<br/> mqd--GMYQRFLROHVHPPEG-----GSDRYCNLMQRRKMTLYHCKRFNTFIHEDIWNIRSI CSTTNIQCKNGKMNCHEG--VVKVTDICRDTGSSRAPNCRIRAIASRRVVIACEINFPQVPVHFDG--<br/> ---keSAAAKFERQHMDSGNspSSSNYCNLMCCCKMTQgKCKPVNTFVHESLADVKAVCSQKKVTCKNGQTnCYQskSTMRIIDCRETGSSKYPNIAKKTQVEKHIIVACGGkpSVPVHFDASV</p>  |
| 875 | <p>1rmfA<br/>(120)</p> <p>1y92B<br/>(124)</p> | N | 42.50 | <p><b>TM-align:</b> aliSize=100 (resi) RMSD=1.34 (Å)<br/> mqdgmqrflrqhvhppeg-----GSDRYCNLMQRRKMTLYHCKRFNTFIHEDIWNIRSI CSTTNIQCKNGKMNCHEG--VVKVTDICRDTGSSRAPNCRIRAIASRRVVIACEINFPQVPVHFDG--<br/> -----kesaaakferqhmdsgnsasSSSNYCNLMCCCKMTQgKCKPVNTFVHESLADVKAVCSQKKVTCKDGQTnCYQskSTMRIIDCRETGSSKYPNIAKKTQVEKHIIVACGGkpSVPVHFDASV</p> <p><b>SARST:</b> aliSize=114 (resi) RMSD=9.35 (Å)<br/> mqdg---MYQRFLROHVHPPEG-----GSDRYCNLMQRRKMTLYHCKRFNTFIHEDIWNIRSI CSTTNIQCKNGKMNCHEG--GVVKVTDICRDTGSSRAPNCRIRAIASRRVVIACEINFPQVPVHFDG--g<br/> ---kesAAAKFERQHMDSGNspSSSNYCNLMCCCKMTQgKCKPVNTFVHESLADVKAVCSQKKVTCKDGQTnCYQskSTMRIIDCRETGSSKYPNIAKKTQVEKHIIVACGGkpSVPVHFDASV--</p> <p><b>BLAST:</b> aliSize=75 (resi) iden=42.50% (51/120) simi=62.50% (75/120)<br/> mqdgmqr-----RFLROHVHPPEG-----GSDRYCNLMQRRKMTLYHCKRFNTFIHEDIWNIRSI CSTTNIQCKNGKMNCHEG--GVVKVTDICRDTGSSRAPNCRIRAIASRRVVIACEINFPQVPVHFDG--g<br/> -----kesaaakFERQHMDSGNspSSSNYCNLMCCCKMTQgKCKPVNTFVHESLADVKAVCSQKKVTCKDGQTnCYQskSTMRIIDCRETGSSKYPNIAKKTQVEKHIIVACGGkpSVPVHFDASV--</p> <p><b>Proposed:</b> aliSize=116 (resi) RMSD=1.20 (Å)<br/> mqd--GMYQRFLROHVHPPEG-----GSDRYCNLMQRRKMTLYHCKRFNTFIHEDIWNIRSI CSTTNIQCKNGKMNCHEG--VVKVTDICRDTGSSRAPNCRIRAIASRRVVIACEINFPQVPVHFDG--<br/> ---keSAAAKFERQHMDSGNspSSSNYCNLMCCCKMTQgKCKPVNTFVHESLADVKAVCSQKKVTCKDGQTnCYQskSTMRIIDCRETGSSKYPNIAKKTQVEKHIIVACGGkpSVPVHFDASV</p> |

|     |                                                                   |            |                                                                                                                                                                                                                                                                                                                                                                                                                                                                                                                                                                                                                                                                                                                                                                                                                                                                                                                                                                                                                                                                                                                                                                                                                                                                                                                                                                                                                                                                                                                                                                                                                                                                                                                                                                                                                                 |
|-----|-------------------------------------------------------------------|------------|---------------------------------------------------------------------------------------------------------------------------------------------------------------------------------------------------------------------------------------------------------------------------------------------------------------------------------------------------------------------------------------------------------------------------------------------------------------------------------------------------------------------------------------------------------------------------------------------------------------------------------------------------------------------------------------------------------------------------------------------------------------------------------------------------------------------------------------------------------------------------------------------------------------------------------------------------------------------------------------------------------------------------------------------------------------------------------------------------------------------------------------------------------------------------------------------------------------------------------------------------------------------------------------------------------------------------------------------------------------------------------------------------------------------------------------------------------------------------------------------------------------------------------------------------------------------------------------------------------------------------------------------------------------------------------------------------------------------------------------------------------------------------------------------------------------------------------|
| 876 | <p><b>1mfA</b><br/>(120)</p> <hr/> <p><b>3bcoA</b><br/>(124)</p>  | N<br>41.67 | <p><b>TM-align:</b> aliSize=100 (resi) RMSD=1.55 (Å)<br/> mqdgmqrflrqhvhp<del>ee</del>tg-----GSDRYCNLMQRKMTLYHCKRFNTFIHEDIWNIRSI<del>CS</del>TTNIQCKNGKMN<del>CHEG</del>--VVKVTD<del>CD</del>RTGSSRAPNCR<del>RY</del>RAIASTRRVVIACE<del>EN</del>FQVPVHFDG--<br/> -----kesaaakferqhmdsgnsasSSSNYCNLMCCRKMTQgKCKPNTFVHESLADVKAVCSQKKVTCKDQOTNCYQSkSTMRI<del>TD</del>CRETGSSKY<del>PN</del>CAYKTTQVEKHIIVACGGKPSVPVHFDAsv</p> <p><b>SARST:</b> aliSize=113 (resi) RMSD=8.94 (Å)<br/> mqdg---MYQRFLRQHVHpeE--TGGSDR-FCNLMQRKMTLYHCKRFNTFIHEDIWNIRSI<del>CS</del>TTNIQCKNGKMN<del>CHE</del>--GVVKVTD<del>CD</del>RTGSSRAPNCR<del>RY</del>RAIASTRRVVIACE<del>EN</del>FQVPVHFD---g<br/> ---kesAAAKFEROHMD--SgnSASSSSnYCNLMCCRKMTQgKCKPNTFVHESLADVKAVCSQKKVTCKDQOTNCYQSkSTMRI<del>TD</del>CRETGSSKY<del>PN</del>CAYKTTQVEKHIIVACGGKPSVPVHFDAsv-</p> <p><b>BLAST:</b> aliSize=74 (resi) iden=41.67% (50/120) simi=61.67% (74/120)<br/> mqdgmqr-----RFLRQHVHP-EETGGSDRYCNLMQRKMTLYHCKRFNTFIHEDIWNIRSI<del>CS</del>TTNIQCKNGKMN<del>CHE</del>--GVVKVTD<del>CD</del>RTGSSRAPNCR<del>RY</del>RAIASTRRVVIACE<del>EN</del>FQVPVHFD---g<br/> -----kesaaakFEROHMDsgNSASSSSnYCNLMCCRKMTQgKCKPNTFVHESLADVKAVCSQKKVTCKDQOTNCYQSkSTMRI<del>TD</del>CRETGSSKY<del>PN</del>CAYKTTQVEKHIIVACGGKPSVPVHFDAsv-</p> <p><b>Proposed:</b> aliSize=117 (resi) RMSD=1.40 (Å)<br/> mqd--GMYQRFLRQHVHPEETGGS-DRYCNLMQRKMTLYHCKRFNTFIHEDIWNIRSI<del>CS</del>TTNIQCKNGKMN<del>CHEG</del>--VVKVTD<del>CD</del>RTGSSRAPNCR<del>RY</del>RAIASTRRVVIACE<del>EN</del>FQVPVHFDG--<br/> ---keSAAAKFEROHMDSGNSASSsNYCNLMCCRKMTQgKCKPNTFVHESLADVKAVCSQKKVTCKDQOTNCYQSkSTMRI<del>TD</del>CRETGSSKY<del>PN</del>CAYKTTQVEKHIIVACGGKPSVPVHFDAsv</p>                                                                                                                             |
| 877 | <p><b>1mfA</b><br/>(120)</p> <hr/> <p><b>1y94A</b><br/>(124)</p>  | N<br>42.50 | <p><b>TM-align:</b> aliSize=100 (resi) RMSD=1.59 (Å)<br/> mqdgmqrflrqhvhp<del>ee</del>tg-----GSDRYCNLMQRKMTLYHCKRFNTFIHEDIWNIRSI<del>CS</del>TTNIQCKNGKMN<del>CHEG</del>--VVKVTD<del>CD</del>RTGSSRAPNCR<del>RY</del>RAIASTRRVVIACE<del>EN</del>FQVPVHFDG--<br/> -----kesaaakferqhmdsst<del>aa</del>SSSNYCNLMCCRKMTQgKCKPNTFVHESLADVKAVCSQKKVTCKDQOTNCYQSkSTMRI<del>TD</del>CRETGSSKY<del>PN</del>CAYKTTQVEKHIIVACGGKPSVPVHFDAsv</p> <p><b>SARST:</b> aliSize=112 (resi) RMSD=8.88 (Å)<br/> mqdg---MYQRFLRQHVH---PEETGgsdRYCNLMQRKMTLYHCKRFNTFIHEDIWNIRSI<del>CS</del>TTNIQCKNGKMN<del>CHE</del>--GVVKVTD<del>CD</del>RTGSSRAPNCR<del>RY</del>RAIASTRRVVIACE<del>EN</del>FQVPVHFD---g<br/> ---kesAAAKFEROHMDSst<del>aa</del>SSSNYCNLMCCRKMTQgKCKPNTFVHESLADVKAVCSQKKVTCKDQOTNCYQSkSTMRI<del>TD</del>CRETGSSKY<del>PN</del>CAYKTTQVEKHIIVACGGKPSVPVHFDAsv-</p> <p><b>BLAST:</b> aliSize=76 (resi) iden=42.50% (51/120) simi=63.33% (76/120)<br/> mqdgmqr-----RFLRQHVHPPEETGGSDRYCNLMQRKMTLYHCKRFNTFIHEDIWNIRSI<del>CS</del>TTNIQCKNGKMN<del>CHE</del>--GVVKVTD<del>CD</del>RTGSSRAPNCR<del>RY</del>RAIASTRRVVIACE<del>EN</del>FQVPVHFD---g<br/> -----kesaaakFEROHMDSST<del>aa</del>SSSNYCNLMCCRKMTQgKCKPNTFVHESLADVKAVCSQKKVTCKDQOTNCYQSkSTMRI<del>TD</del>CRETGSSKY<del>PN</del>CAYKTTQVEKHIIVACGGKPSVPVHFDAsv-</p> <p><b>Proposed:</b> aliSize=117 (resi) RMSD=1.41 (Å)<br/> mqd--GMYQRFLRQHVHPPEETGGS-DRYCNLMQRKMTLYHCKRFNTFIHEDIWNIRSI<del>CS</del>TTNIQCKNGKMN<del>CHEG</del>--VVKVTD<del>CD</del>RTGSSRAPNCR<del>RY</del>RAIASTRRVVIACE<del>EN</del>FQVPVHFDG--<br/> ---keSAAAKFEROHMDSST<del>aa</del>SSSNYCNLMCCRKMTQgKCKPNTFVHESLADVKAVCSQKKVTCKDQOTNCYQSkSTMRI<del>TD</del>CRETGSSKY<del>PN</del>CAYKTTQVEKHIIVACGGKPSVPVHFDAsv</p>                                                                                     |
| 878 | <p><b>2j4tA</b><br/>(119)</p> <hr/> <p><b>1lbgA</b><br/>(124)</p> | N<br>34.45 | <p><b>TM-align:</b> aliSize=97 (resi) RMSD=1.62 (Å)<br/> neryekflrqhyd<del>ak</del>pq-----GRDDRYCESMMKERKLT<del>S</del>-PCKD<del>V</del>NTFIHGTTKNIRAIGkK<del>G</del>SPYG-----ENFRISNSPFQITITHSRGSPWPPCGYRAFKDFRYIV<del>I</del>ACED--GW<del>P</del>VHFD<del>E</del>sFI<del>S</del>p<br/> -----kesaaakferqhmdsgnspSSSNYCNLMCCRKMTQgKCKPNTFVHESLADVKAVCS--QKKVTckngqTNCYQSkSTMRI<del>TD</del>CRETGSSKY<del>PN</del>CAYKTTQVEKHIIVACGGKPSVPVHFDAsv--</p> <p><b>SARST:</b> aliSize=108 (resi) RMSD=9.51 (Å)<br/> ne---RYEKFLRQHYD<del>AK</del>PQGRDDR-FCESMMKERKLT<del>S</del>-PCKD<del>V</del>NTFIHGTTKNIRAIGkK<del>G</del>SPY-----GENFRISNSPFQITITHSRGSPWPPCGYRAFKDFRYIV<del>I</del>ACED--GW<del>P</del>VHFD---desfisp<br/> ---kesAAAKFEROHMDsgNSPSSSNYCNLMCCRKMTQgKCKPNTFVHESLADVKAVCS--SOKKVtckngqTNCYQSkSTMRI<del>TD</del>CRETGSSKY<del>PN</del>CAYKTTQVEKHIIVACGGKPSVPVHFDAsv-----</p> <p><b>BLAST:</b> aliSize=65 (resi) iden=36.97% (44/119) simi=54.62% (65/119)<br/> nerye-----KFLRQHYD<del>AK</del>-KQGRDDRFCESMMKERKLT<del>S</del>-PCKD<del>V</del>NTFIHGTTKNIRAIGkK<del>G</del>SPY-----ENFRISNSPFQITITHSRGSPWPPCGYRAFKDFRYIV<del>I</del>ACED--EDGW<del>P</del>VHFD<del>E</del>sFI<del>S</del>p<br/> -----kesaaakFEROHMDsgNSPSSSNYCNLMCCRKMTQgKCKPNTFVHESLADVKAVCS--SOKKVtckngqTNCYQSkSTMRI<del>TD</del>CRETGSSKY<del>PN</del>CAYKTTQVEKHIIVACGGKPSVPVHFDAsv-----</p> <p><b>Proposed:</b> aliSize=112 (resi) RMSD=1.29 (Å)<br/> n--ERYEKFLRQHYD<del>AK</del>--PQGRDDRFCESMMKERKLT<del>S</del>-PCKD<del>V</del>NTFIHGTTKNIRAIGkK<del>G</del>SPYG-----ENFRISNSPFQITITHSRGSPWPPCGYRAFKDFRYIV<del>I</del>ACED--GW<del>P</del>VHFD<del>E</del>sFI<del>S</del>p<br/> -keSAAAKFEROHMDsgNSPSSSNYCNLMCCRKMTQgKCKPNTFVHESLADVKAVCS--QKKVTckngqTNCYQSkSTMRI<del>TD</del>CRETGSSKY<del>PN</del>CAYKTTQVEKHIIVACGGKPSVPVHFDAsv--</p> |

|     |                                                     |   |       |                                                                                                                                                                                                                                                                                                                                                                                                                                                                                                                                                                                                                                                                                                                                                                                                                                                                                                                                                                                                                                                                                                                                                                                                                                                                                                                                                                                             |
|-----|-----------------------------------------------------|---|-------|---------------------------------------------------------------------------------------------------------------------------------------------------------------------------------------------------------------------------------------------------------------------------------------------------------------------------------------------------------------------------------------------------------------------------------------------------------------------------------------------------------------------------------------------------------------------------------------------------------------------------------------------------------------------------------------------------------------------------------------------------------------------------------------------------------------------------------------------------------------------------------------------------------------------------------------------------------------------------------------------------------------------------------------------------------------------------------------------------------------------------------------------------------------------------------------------------------------------------------------------------------------------------------------------------------------------------------------------------------------------------------------------|
| 879 | <p>2j4tA<br/>(119)</p> <hr/> <p>1y92B<br/>(124)</p> | N | 33.61 | <p><b>TM-align:</b> aliSize=97 (resi) RMSD=1.67 (Å)<br/> neryekflrqhydakp-----GRDDRYCESMMKERKLLTS-PCKDVNTFIHGTTKNIRAICGkkGSPYG-----ENFRISNSPFQITITHSRGSPPWPCGYRAFKDFRYTVIACED--GWPVHFDEsFIsp<br/> -----kesaaakferqhmdsgnSaSSSSNYCNLMCCRKMTQgKCKPNTFVHESLADVKAVCS--QKKVTckdgqTNCYOSKSTMRIIDCRETGSSKYENCAKTTQVEKHIIVACGGkpSVPVHFDA-SV--</p> <p><b>SARST:</b> aliSize=108 (resi) RMSD=9.41 (Å)<br/> ne---RYEFLROHYDAKPOGRDDR-FCESMMKERKLLTS-PCKDVNTFIHGTTKNIRAICGkkGSPY-----GENFRISNSPFQITITHSRGSPPWPCGYRAFKDFRYTVIACED--GWPVHF-----desfisp<br/> --kesAAAKFEROHMDSGNsASSSSnYCNLMCCRKMTQgKCKPNTFVHESLADVKAVG--SOKKVtckdgQTCYOSKSTMRIIDCRETGSSKYENCAKTTQVEKHIIVACGGkpSVPVHFdasv-----</p> <p><b>BLAST:</b> aliSize=63 (resi) iden=36.13% (43/119) simi=52.94% (63/119)<br/> nerye-----KFLROHYDA-KPOGRDDRYCESMMKERKLLTS-PCKDVNTFIHGTTKNIRAICGkkGSPY--FE-NFRISNSPFQITITHSRGSPPWPCGYRAFKDFRYTVIAC--EDGWPVHFDES-fisp<br/> -----kesaaakFEROHMDSgnSASSSSNYCNLMCCRKMTQgKCKPNTFVHESLADVKAVCSQKVKTCkdqTNCYOSKSTMRIIDCRETGSSKYENCAKTTQVEKHIIVACggKPSVPVHFDAsv-----</p> <p><b>Proposed:</b> aliSize=113 (resi) RMSD=1.40 (Å)<br/> n--ERYEFLROHYDAKPO-GRDDRYCESMMKERKLLTS-PCKDVNTFIHGTTKNIRAICGkkGSPYG-----ENFRISNSPFQITITHSRGSPPWPCGYRAFKDFRYTVIACED--GWPVHFDEsFIsp<br/> -keSAAAKFEROHMDSGNsASSSSNYCNLMCCRKMTQgKCKPNTFVHESLADVKAVCS--QKKVTckdgqTNCYOSKSTMRIIDCRETGSSKYENCAKTTQVEKHIIVACGGkpSVPVHFDA-SV--</p> |
| 880 | <p>2j4tA<br/>(119)</p> <hr/> <p>3bcoA<br/>(124)</p> | N | 33.61 | <p><b>TM-align:</b> aliSize=97 (resi) RMSD=1.69 (Å)<br/> neryekflrqhydakp-----GRDDRYCESMMKERKLLTS-PCKDVNTFIHGTTKNIRAICGkkGSPYG-----ENFRISNSPFQITITHSRGSPPWPCGYRAFKDFRYTVIACED-DGWPVHFDEsFIsp<br/> -----kesaaakferqhmdsgnsaSSSSNYCNLMCCRKMTQgKCKPNTFVHESLADVKAVCS--QKKVTckdgqTNCYOSKSTMRIIDCRETGSSKYENCAKTTQVEKHIIVACGgKpSVPVHFDA-SV--</p> <p><b>SARST:</b> aliSize=109 (resi) RMSD=9.91 (Å)<br/> ne---RYEFLROHYDAKPOGRDDR-FCESMMKERKLLTS-PCKDVNTFIHGTTKNIRAICGkkGSPY--YGENFRISNSPFQITITHSRGSPPWPCGYRAFKDFRYTVIACEDGWPVHF-----desfisp<br/> --kesAAAKFEROHMDSGNSASSSSnYCNLMCCRKMTQgKCKPNTFVHESLADVKAVCSQKVKTCkdqTNCYOSKSTMRIIDCRETGSSKYENCAKTTQVEKHIIVACG--KPSVPVhfdasv-----</p> <p><b>BLAST:</b> aliSize=63 (resi) iden=36.13% (43/119) simi=52.94% (63/119)<br/> nerye-----KFLROHYDA-KPOGRDDRYCESMMKERKLLTS-PCKDVNTFIHGTTKNIRAICGkkGSPY--FE-NFRISNSPFQITITHSRGSPPWPCGYRAFKDFRYTVIAC--EDGWPVHFDES-fisp<br/> -----kesaaakFEROHMDSgNSASSSSNYCNLMCCRKMTQgKCKPNTFVHESLADVKAVCSQKVKTCkdqTNCYOSKSTMRIIDCRETGSSKYENCAKTTQVEKHIIVACggKPSVPVHFDAsv-----</p> <p><b>Proposed:</b> aliSize=113 (resi) RMSD=1.43 (Å)<br/> n--ERYEFLROHYDAKPOGR-DDRYCESMMKERKLLTS-PCKDVNTFIHGTTKNIRAICGkkGSPYG-----ENFRISNSPFQITITHSRGSPPWPCGYRAFKDFRYTVIACED--GWPVHFDEsFIsp<br/> -keSAAAKFEROHMDSGNSASsSSNYCNLMCCRKMTQgKCKPNTFVHESLADVKAVCS--QKKVTckdgqTNCYOSKSTMRIIDCRETGSSKYENCAKTTQVEKHIIVACGGkpSVPVHFDA-SV--</p>      |
| 881 | <p>2j4tA<br/>(119)</p> <hr/> <p>1y94A<br/>(124)</p> | N | 33.61 | <p><b>TM-align:</b> aliSize=97 (resi) RMSD=1.74 (Å)<br/> neryekflrqhydakp-----GRDDRYCESMMKERKLLTS-PCKDVNTFIHGTTKNIRAICGkkGSPYG-----ENFRISNSPFQITITHSRGSPPWPCGYRAFKDFRYTVIACED--GWPVHFDEsFIsp<br/> -----kesaaakferqhmdsstSaASSNYCNLMCCRKMTQgKCKPNTFVHESLADVKAVCS--QKKVTckdgqTNCYOSKSTMRIIDCRETGSSKYENCAKTTQVEKHIIVACGGkpSVPVHFDA-SV--</p> <p><b>SARST:</b> aliSize=108 (resi) RMSD=9.40 (Å)<br/> ne---RYEFLROHYDAKPOGRDDR-FCESMMKERKLLTS-PCKDVNTFIHGTTKNIRAICGkkGSPY-----GENFRISNSPFQITITHSRGSPPWPCGYRAFKDFRYTVIACED--GWPVHF-----desfisp<br/> --kesAAAKFEROHMDSSTSAASSnYCNLMCCRKMTQgKCKPNTFVHESLADVKAVG--SOKKVtckdgQTCYOSKSTMRIIDCRETGSSKYENCAKTTQVEKHIIVACGGkpSVPVHFdasv-----</p> <p><b>BLAST:</b> aliSize=63 (resi) iden=36.13% (43/119) simi=52.94% (63/119)<br/> nerye-----KFLROHYDAKPOGRDDRYCESMMKERKLLTS-PCKDVNTFIHGTTKNIRAICGkkGSPY--FE-NFRISNSPFQITITHSRGSPPWPCGYRAFKDFRYTVIAC--EDGWPVHFDES-fisp<br/> -----kesaaakFEROHMDSSTSAASSnYCNLMCCRKMTQgKCKPNTFVHESLADVKAVCSQKVKTCkdqTNCYOSKSTMRIIDCRETGSSKYENCAKTTQVEKHIIVACggKPSVPVHFDAsv-----</p> <p><b>Proposed:</b> aliSize=112 (resi) RMSD=1.34 (Å)<br/> n--ERYEFLROHYDAK--POGrDDRYCESMMKERKLLTS-PCKDVNTFIHGTTKNIRAICGkkGSPYG-----ENFRISNSPFQITITHSRGSPPWPCGYRAFKDFRYTVIACED--GWPVHFDEsFIsp<br/> -keSAAAKFEROHMDSSTsAAS-SSNYCNLMCCRKMTQgKCKPNTFVHESLADVKAVCS--QKKVTckdgqTNCYOSKSTMRIIDCRETGSSKYENCAKTTQVEKHIIVACGGkpSVPVHFDA-SV--</p>   |

|     |                |   |       |                                                                                                                                                                                                                                                                                                                                                                                                                                                                                                                                                                                                                                                                                                                                                                                                                                                                                                                                                                                                                                                                                                                                                                                                                                                                                                                                                                                                                             |
|-----|----------------|---|-------|-----------------------------------------------------------------------------------------------------------------------------------------------------------------------------------------------------------------------------------------------------------------------------------------------------------------------------------------------------------------------------------------------------------------------------------------------------------------------------------------------------------------------------------------------------------------------------------------------------------------------------------------------------------------------------------------------------------------------------------------------------------------------------------------------------------------------------------------------------------------------------------------------------------------------------------------------------------------------------------------------------------------------------------------------------------------------------------------------------------------------------------------------------------------------------------------------------------------------------------------------------------------------------------------------------------------------------------------------------------------------------------------------------------------------------|
| 882 | 1bleA<br>(123) | N | 30.89 | <p><b>TM-align:</b> aliSize=97 (resi) RMSD=1.87 (Å)<br/> qdnsrythfl tqhyd akpq-----GRDDRYCESI RRRGLTS-PCODINTFIHG NKRSI KAI C EnknGNPHR----EN-LRI SKSSFQVIT KLHGGSPWP PQYRAIAGFRNVVACE-N-GLPVHLDQsIFrrp<br/> -----kesaaakferqhmdsgnspSSSNYNLMCCRKMlQgKlKPVNTFVHESLADVAVCS---QKKVTckngQTnCYOSKSTMRIIDRETSSKYPNAYKTIQVEKHIIVACGgKpSVPVHFDA-SV---</p> <p><b>SARST:</b> aliSize=108 (resi) RMSD=9.99 (Å)<br/> qdns---RYTHLTOHYDAKPOGRDDR- YCESI RRRGLT-SPQDINTFIHG NKRSI KAI C enknGNPH----RENLRI SKSSFQVIT KLHGGSPWP PQYRAIAGFRNVVACENGLPVHL----dqsifrrp<br/> ---kesAAAKFEROHMDSGNSPSSSNYNLMCCRKMlQgKlKPVNTFVHESLADVAVCS---SOKKVTckngQTnCYOSKSTMRIIDRETSSKYPNAYKTIQVEKHIIVACGGKPSVPVHFdasv-----</p> <p><b>BLAST:</b> aliSize=65 (resi) iden=33.33% (41/123) simi=52.85% (65/123)<br/> qdnsryth-----FLTOHYDA-KPOGRDDR YCESI RRRGLTS-PCODINTFIHG NKRSI KAI C EN-----KngnphRENLRISKSSFQVIT KLHGGSPWP PQYRAIAGFRNVVAC--ENGLPVHLDQsIFrrp<br/> -----kesaaakFEROHM SgnSPSSSNYNLMCCRKMlQgKlKPVNTFVHESLADVAVCSQkvtckng---QTnCYOSKSTMRIIDRETSSKYPNAYKTIQVEKHIIVACggKPSVPVHFDA-SV----</p> <p><b>Proposed:</b> aliSize=111 (resi) RMSD=1.34 (Å)<br/> qdn---RYTHLTOHYDAK-POGRDDRYCESI RRRGLTS-PCODINTFIHG NKRSI KAI C EnknGNPHR----EN-LRI SKSSFQVIT KLHGGSPWP PQYRAIAGFRNVVACE-N-GLPVHLDQsI-frrp<br/> ---keSAAAKFEROHM SGNsPSS-SNYNLMCCRKMlQgKlKPVNTFVHESLADVAVCS---QKKVTckngqTnCYOSKSTMRIIDRETSSKYPNAYKTIQVEKHIIVACGgKpSVPVHFDA-Sv----</p> |
|     | 1lbgA<br>(124) |   |       |                                                                                                                                                                                                                                                                                                                                                                                                                                                                                                                                                                                                                                                                                                                                                                                                                                                                                                                                                                                                                                                                                                                                                                                                                                                                                                                                                                                                                             |
| 883 | 1bleA<br>(123) | N | 28.46 | <p><b>TM-align:</b> aliSize=97 (resi) RMSD=1.95 (Å)<br/> qdnsrythfl tqhydakpq-----GRDDRYCESI RRRGLTS-PCODINTFIHG NKRSI KAI C EnknGNPHR---E-N-LRI SKSSFQVIT KLHGGSPWP PQYRAIAGFRNVVACEN--GLPVHLDQsIFrrp<br/> -----kesaaakferqhmdsgnsaSSSNYNLMCCRKMlQgKlKPVNTFVHESLADVAVCS---QKKVTckdGqTnCYOSKSTMRIIDRETSSKYPNAYKTIQVEKHIIVACGGKpSVPVHFDA-SV---</p> <p><b>SARST:</b> aliSize=108 (resi) RMSD=9.31 (Å)<br/> qdns---RYTHLTOHYDAKPOGRDDRYCESI RRRGLT-SPQDINTFIHG NKRSI KAI C enknGNPH----RENLRISKSSFQVIT KLHGGSPWP PQYRAIAGFRNVVACEN--GLPVHL----dqsifrrp<br/> ---kesAAAKFEROHM SGNsASSSSNYNLMCCRKMlQgKlKPVNTFVHESLADVAVCS---SOKKVTckdGqTnCYOSKSTMRIIDRETSSKYPNAYKTIQVEKHIIVACGGKpSVPVHFdasv-----</p> <p><b>BLAST:</b> aliSize=61 (resi) iden=30.89% (38/123) simi=49.59% (61/123)<br/> qdnsryth-----FLTOHYDA-KPOGRDDRYCESI RRRGLTS-PCODINTFIHG NKRSI KAI C EN---NGNPHRENLRISKSSFQVIT KLHGGSPWP PQYRAIAGFRNVVAC--ENGLPVHLDQsIFrrp<br/> -----kesaaakFEROHM SgnSASSSNYNLMCCRKMlQgKlKPVNTFVHESLADVAVCSQkvTCKDGQTnCYOSKSTMRIIDRETSSKYPNAYKTIQVEKHIIVACggKPSVPVHFDA-SV----</p> <p><b>Proposed:</b> aliSize=112 (resi) RMSD=1.46 (Å)<br/> Q-dnSRYTHLTOHYDAKPOGRDDRYCESI RRRGLTS-PCODINTFIHG NKRSI KAI C EnknGNPHR---E-N-LRI SKSSFQVIT KLHGGSPWP PQYRAIAGFRNVVACEN--GLPVHLDQsI-frrp<br/> Ke--SAAAKFEROHM SGNsASSSSNYNLMCCRKMlQgKlKPVNTFVHESLADVAVCS---QKKVTckdGqTnCYOSKSTMRIIDRETSSKYPNAYKTIQVEKHIIVACGGKpSVPVHFDA-Sv----</p>            |
|     | 1y92B<br>(124) |   |       |                                                                                                                                                                                                                                                                                                                                                                                                                                                                                                                                                                                                                                                                                                                                                                                                                                                                                                                                                                                                                                                                                                                                                                                                                                                                                                                                                                                                                             |
| 884 | 1bleA<br>(123) | N | 28.46 | <p><b>TM-align:</b> aliSize=97 (resi) RMSD=1.95 (Å)<br/> qdnsrythfl tqhydakpq-----GRDDRYCESI RRRGLTS-PCODINTFIHG NKRSI KAI C EnknGNPHR----EN-LRI SKSSFQVIT KLHGGSPWP PQYRAIAGFRNVVACE-N-GLPVHLDQsIFrrp<br/> -----kesaaakferqhmdsgnsaSSSNYNQNMCCRKMlQgKlKPVNTFVHESLADVAVCS---QKKVTckdGqTnCYOSKSTMRIIDRETSSKYPNAYKTIQVEKHIIVACGgKpSVPVHFDA-SV---</p> <p><b>SARST:</b> aliSize=108 (resi) RMSD=9.41 (Å)<br/> qdns---RYTHLTOHYDAKPOGRDDR- YCESI RRRGLT-SPQDINTFIHG NKRSI KAI C enknGNPH----RENLRISKSSFQVIT KLHGGSPWP PQYRAIAGFRNVVACEN--GLPVHL----dqsifrrp<br/> ---kesAAAKFEROHMDSGNSASSSNYNQNMCCRKMlQgKlKPVNTFVHESLADVAVCS---SOKKVTckdGqTnCYOSKSTMRIIDRETSSKYPNAYKTIQVEKHIIVACGGKpSVPVHFdasv-----</p> <p><b>BLAST:</b> aliSize=61 (resi) iden=30.89% (38/123) simi=49.59% (61/123)<br/> qdnsryth-----FLTOHYDA-KPOGRDDRYCESI RRRGLTS-PCODINTFIHG NKRSI KAI C EN---NGNPHRENLRISKSSFQVIT KLHGGSPWP PQYRAIAGFRNVVAC--ENGLPVHLDQsIFrrp<br/> -----kesaaakFEROHM SgnSASSSNYNQNMCCRKMlQgKlKPVNTFVHESLADVAVCSQkvTCKDGQTnCYOSKSTMRIIDRETSSKYPNAYKTIQVEKHIIVACggKPSVPVHFDA-SV----</p> <p><b>Proposed:</b> aliSize=111 (resi) RMSD=1.39 (Å)<br/> Q-dnSRYTHLTOHYDAK-POGRDDRYCESI RRRGLTS-PCODINTFIHG NKRSI KAI C EnknGNPHR----EN-LRI SKSSFQVIT KLHGGSPWP PQYRAIAGFRNVVACE-N-GLPVHLDQsI-frrp<br/> Ke--SAAAKFEROHM SGNsASS-SNYNQNMCCRKMlQgKlKPVNTFVHESLADVAVCS---QKKVTckdGqTnCYOSKSTMRIIDRETSSKYPNAYKTIQVEKHIIVACGgKpSVPVHFDA-Sv----</p>      |
|     | 3bcoA<br>(124) |   |       |                                                                                                                                                                                                                                                                                                                                                                                                                                                                                                                                                                                                                                                                                                                                                                                                                                                                                                                                                                                                                                                                                                                                                                                                                                                                                                                                                                                                                             |

|     |                                                     |            |                                                                                                                                                                                                                                                                                                                                                                                                                                                                                                                                                                                                                                                                                                                                                                                                                                                                                                                                                                                                                                                                                                                                                                                                                                                                                                                                                                                                                                             |
|-----|-----------------------------------------------------|------------|---------------------------------------------------------------------------------------------------------------------------------------------------------------------------------------------------------------------------------------------------------------------------------------------------------------------------------------------------------------------------------------------------------------------------------------------------------------------------------------------------------------------------------------------------------------------------------------------------------------------------------------------------------------------------------------------------------------------------------------------------------------------------------------------------------------------------------------------------------------------------------------------------------------------------------------------------------------------------------------------------------------------------------------------------------------------------------------------------------------------------------------------------------------------------------------------------------------------------------------------------------------------------------------------------------------------------------------------------------------------------------------------------------------------------------------------|
| 885 | <p>1bleA<br/>(123)</p> <hr/> <p>1y94A<br/>(124)</p> | N<br>28.46 | <p><b>TM-align:</b> aliSize=96 (resi) RMSD=1.89 (Å)<br/> qdnsrythfl tqhyd akpq-----GRDDRYCESI RRRGLTS-PCODINTFIHG NKRSIKAI CenknGNPHR----EN-LRI SKSSFQVITIKLH-GGSppWPPQYRATAGFRNVVACE-N-GLPVHLQsIFrrp<br/> -----kesaaakferqhmdsstsaASSSNYCNLMCCRKMtQgKkKPVNTFVHESLADVKAVCS---QKkVtckdgQTnCYOSKSTMRIIDRETgSSK-YINCAAYKTTQVEKHIIVACGgkpsVPVHFA-SV----</p> <p><b>SARST:</b> aliSize=107 (resi) RMSD=9.23 (Å)<br/> qdns---RYTHFLTQHYD--AKPOGRdRYCESI RRRGLTS-SPQDINTFIHG NKRSIKAI CenknGNPH----REN-LRI SKSSFQVITIKLHGGSPWPPQYRATAGFRNVVACEN--GLPVHL----dqsifrrp<br/> ---kesAAAKFERQHMDsstsaASS-SNYCNLMCCRKMtQgKkKPVNTFVHESLADVKAVC---SOKKvtckdgQTnCYOSKSTMRIIDRETgSSKYINCAAYKTTQVEKHIIVACGGkpsVPVHFDASV-----</p> <p><b>BLAST:</b> aliSize=61 (resi) iden=30.89% (38/123) simi=49.59% (61/123)<br/> qdnsryth-----FLTQHYDAKPOGRD-RYCESI RRRGLTS-PCODINTFIHG NKRSIKAI CenknGNPHREN-LRI SKSSFQVITIKLHGGSPWPPQYRATAGFRNVVAC--ENGLPVHLQsIFrrp<br/> -----kesaaakFERQHMDsstsaASSsNYCNLMCCRKMtQgKkKPVNTFVHESLADVKAVCSQkvTCKDGTnCYOSKSTMRIIDRETgSSKYINCAAYKTTQVEKHIIVACggkpsVPVHFDASV----</p> <p><b>Proposed:</b> aliSize=110 (resi) RMSD=1.37 (Å)<br/> Q-dnRYTHFLTQHYDAK-POG-rdDRYCESI RRRGLTS-PCODINTFIHG NKRSIKAI CenknGNPHR----EN-LRI SKSSFQVITIKLH-GGSppWPPQYRATAGFRNVVACE-N-GLPVHLQsI-frrp<br/> ke--SAAAKFERQHMDsstsaASS--SNYCNLMCCRKMtQgKkKPVNTFVHESLADVKAVCS---QKkVtckdgQTnCYOSKSTMRIIDRETgSSK-YINCAAYKTTQVEKHIIVACGgkpsVPVHFA-Sv----</p>         |
| 886 | <p>2hkyA<br/>(129)</p> <hr/> <p>11bgA<br/>(124)</p> | N<br>35.48 | <p><b>TM-align:</b> aliSize=97 (resi) RMSD=2.07 (Å)<br/> mkpkgmtssqwfk iqhm gpsp-----QACNSAMK--NINKhtKRCKDLNTEFLHEPFSSVAATCQTPKIAg-KNgDKNCHOSHGPVSLIMCKLI-SGKYPNCRYEKRQNSYVACKPPqkkdsqqfHLVPVHLDRVL<br/> -----kesaaakferqhmdsgnspsssNYCNLMCCRKMtQgKkKPVNTFVHESLADVKAVCSQKkVtckdgQTnCYOSKSTMRIIDRETgSSKYINCAAYKTTQVEKHIIVACGGK-----PSVPVHFDASV</p> <p><b>SARST:</b> aliSize=105 (resi) RMSD=10.27 (Å)<br/> mkpkg-MTSSQWFKIQHMQP--PSPQACNSAMKNI NKHT-----RCKDLNTEFLHEPFSSVAATCQTPKIAgKNGDKNCHOSHGPVSLIMCKLI-TSGKYPNCRYEKRQNSYVACKPP-----qkkdsqqfhlvpvhl drvl<br/> ----kESAAAKFERQHMDsgNSPSSSNYCNLMCCRKMtQgKkKPVNTFVHESLADVKAVCSQKkVtckdgQTnCYOSKSTMRIIDRETgSSKYINCAAYKTTQVEKHIIVACGGKpsvpvhfdasv-----</p> <p><b>BLAST:</b> aliSize=66 (resi) iden=41.94% (52/124) simi=53.23% (66/124)<br/> mkpkgmtssqw-----FKIQHMQP--SPOACNSAMKNI NKHT-RCKDLNTEFLHEPFSSVAATCQTPKIAgKNGDKNCHOSHGPVSLIMCKLI-SGKYPNCRYEKRQNSYVACkppQKkdsqqfhlVPVHL---rvl<br/> -----kesaaakFERQHMDsgnSPSSsnyCNLMCCRKMtQgKkKPVNTFVHESLADVKAVCSQKkVtckdgQTnCYOSKSTMRIIDRETgSSKYINCAAYKTTQVEKHIIVAC---GGKPS-----VPVHFDASV---</p> <p><b>Proposed:</b> aliSize=113 (resi) RMSD=1.91 (Å)<br/> mkpkgMTSSQWFKIQHMQPS--pQ-----ACNSAMK--NINKhtKRCKDLNTEFLHEPFSSVAATCQTPKIAg-KNgDKNCHOSHGPVSLIMCKLI-SGKYPNCRYEKRQNSYVACKPPqkkdsqqfHLVPVHLDRVL<br/> ---kESAAAKFERQHMDSGns-PssssNYCNLMCCRKMtQgKkKPVNTFVHESLADVKAVCSQKkVtckdgQTnCYOSKSTMRIIDRETgSSKYINCAAYKTTQVEKHIIVACGGK-----PSVPVHFDASV</p> |
| 887 | <p>2hkyA<br/>(129)</p> <hr/> <p>1y92B<br/>(124)</p> | N<br>35.48 | <p><b>TM-align:</b> aliSize=97 (resi) RMSD=1.89 (Å)<br/> mkpkgmtssqwfk iqhm gpsp-----QACNSAMK--NINKhtKRCKDLNTEFLHEPFSSVAATCQTPKIAg-KNgDKNCHOSHGPVSLIMCKLI-SGKYPNCRYEKRQNSYVACKPPqkkdsqqfHLVPVHLDRVL<br/> -----kesaaakferqhmdsgnsassssNYCNLMCCRKMtQgKkKPVNTFVHESLADVKAVCSQKkVtckdgQTnCYOSKSTMRIIDRETgSSKYINCAAYKTTQVEKHIIVACGGK-----PSVPVHFDASV</p> <p><b>SARST:</b> aliSize=105 (resi) RMSD=10.34 (Å)<br/> mkpkg-MTSSQWFKIQHMQP--SPOACNSAMKNI NKHT-RCKDL-----NTEFLHEPFSSVAATCQTPKIAgKNGDKNCHOSHGPVSLIMCKLI-TSGKYPNCRYEKRQNSYVACKPP-----qkkdsqqfhlvpvhl drvl<br/> ----kESAAAKFERQHMDsgnSASSSNYCNLMCCRKMtQgKkKPVNTFVHESLADVKAVCSQKkVtckdgQTnCYOSKSTMRIIDRETgSSKYINCAAYKTTQVEKHIIVACGGKpsvpvhfdasv-----</p> <p><b>BLAST:</b> aliSize=65 (resi) iden=39.52% (49/124) simi=52.42% (65/124)<br/> mkpkgmtssqw-----FKIQHMQPSPOACNSA-----KNI NKHT-RCKDLNTEFLHEPFSSVAATCQTPKIAgKNGDKNCHOSHGPVSLIMCKLI-SGKYPNCRYEKRQNSYVACkppQKkdsqqfhlVPVHL---rvl<br/> -----kesaaakFERQHMDSGNSASSSNyCNLMCCRKMtQgKkKPVNTFVHESLADVKAVCSQKkVtckdgQTnCYOSKSTMRIIDRETgSSKYINCAAYKTTQVEKHIIVAC---GGKPS-----VPVHFDASV---</p> <p><b>Proposed:</b> aliSize=113 (resi) RMSD=1.68 (Å)<br/> mkpkgMTSSQWFKIQHMQSPQ-----ACNSAMK--NINKhtKRCKDLNTEFLHEPFSSVAATCQTPKIAg-KNgDKNCHOSHGPVSLIMCKLI-SGKYPNCRYEKRQNSYVACKPPqkkdsqqfHLVPVHLDRVL<br/> ---kESAAAKFERQHMDSG-NsassssNYCNLMCCRKMtQgKkKPVNTFVHESLADVKAVCSQKkVtckdgQTnCYOSKSTMRIIDRETgSSKYINCAAYKTTQVEKHIIVACGGK-----PSVPVHFDASV</p> |



|     |                                             |   |       |                                                                                                                                                                                                                                                                                                                                                                                                                                                                                                                                                                                                                                                                                                                                                                                                                                                                                                                                                                                                                                                                                                                                                                                                                                                                                                                                                                                                                                                    |
|-----|---------------------------------------------|---|-------|----------------------------------------------------------------------------------------------------------------------------------------------------------------------------------------------------------------------------------------------------------------------------------------------------------------------------------------------------------------------------------------------------------------------------------------------------------------------------------------------------------------------------------------------------------------------------------------------------------------------------------------------------------------------------------------------------------------------------------------------------------------------------------------------------------------------------------------------------------------------------------------------------------------------------------------------------------------------------------------------------------------------------------------------------------------------------------------------------------------------------------------------------------------------------------------------------------------------------------------------------------------------------------------------------------------------------------------------------------------------------------------------------------------------------------------------------|
| 888 | <p>2hkyA (129)</p> <hr/> <p>3bcoA (124)</p> | N | 35.48 | <p><b>TM-align:</b> aliSize=97 (resi) RMSD=2.01 (Å)<br/> mkpkgmtssqwfkqhmqpsp-----QACNSAMK--NINKhtKRCKDLNtFLHEPFSSVAATCQTPKIAg-KNgDKNCHOSHGPVSLIMCKLI-SGKYPNCRVKEKRONKSYVVACKPPqkkdsqqfHLVPVHLDRL<br/> -----kesaaakferqhmdsgnsasssNYCNLMCCrKMTQ--GKCKPVNTFVHESLADKAVCSQKVTCKDG-QTNCYQSKSTMRITDCRETgSSKYPNCAYKTTQVEKHIIVACGGK-----PSVPVHFDASV</p> <p><b>SARST:</b> aliSize=103 (resi) RMSD=10.12 (Å)<br/> mkpkgm--TSSQWFKIQHMOPSPQ--ACNSAMKNI NKHT-----RCKDLNtFLHEPFSSVAATCQTPKIAg-KNgDKNCHOSHGPVSLIMCKLI--TSGKY-PNCRVKEKRONKSYVVACKPP-----qkkdsqqfhlvpvhldrv1<br/> -----keSAAAKFERQHMDSGNSASSSSNYCNMQMCCRmtgqKCKPVNTFVHESLADKAVCSQKVTCKDGQTCYQSKSTMRITDCRETgSSKY-PNCAYKTTQVEKHIIVACGGKpsvpvhfdasv-----</p> <p><b>BLAST:</b> aliSize=65 (resi) iden=39.52% (49/124) simi=52.42% (65/124)<br/> mkpkgmtssqw-----FKIQHMOPSPQACNSA-----MKNINHTK-RCKDLNtFLHEPFSSVAATCQTPKIAg-KNgDKNCHOSHGPVSLIMCKLI-SGKYPNCRVKEKRONKSYVVACKPPQKkdsqqfhlVPVHLD---rv1<br/> -----kesaaakFERQHMDSGNSASSSSNYcndMCCRMTQgKCKPVNTFVHESLADKAVCSQKVTCKDGQTCYQSKSTMRITDCRETgSSKYPNCAYKTTQVEKHIIVAC---GGKPS-----VPVHFDASV---</p> <p><b>Proposed:</b> aliSize=113 (resi) RMSD=1.86 (Å)<br/> mkpkmTSSQWFKIQHMOPS-----pQACNSAMK--NINKhtKRCKDLNtFLHEPFSSVAATCQTPKIAg-KNgDKNCHOSHGPVSLIMCKLI-SGKYPNCRVKEKRONKSYVVACKPPqkkdsqqfHLVPVHLDRL<br/> ---K-ESAAAKFERQHMDSGNSASSSSNYCNLMCCrKMTQ--GKCKPVNTFVHESLADKAVCSQKVTCKDG-QTNCYQSKSTMRITDCRETgSSKYPNCAYKTTQVEKHIIVACGGK-----PSVPVHFDASV</p>   |
| 889 | <p>2hkyA (129)</p> <hr/> <p>1y94A (124)</p> | N | 36.29 | <p><b>TM-align:</b> aliSize=97 (resi) RMSD=1.97 (Å)<br/> mkpkgmtssqwfkqhmqpsp-----QACNSAMK--NINKhtKRCKDLNtFLHEPFSSVAATCQTPKIAg-KNgDKNCHOSHGPVSLIMCKLI-SGKYPNCRVKEKRONKSYVVACKPPqkkdsqqfHLVPVHLDRL<br/> -----kesaaakferqhmdsstsaasssNYCNLMCCrKMTQ--GKCKPVNTFVHESLADKAVCSQKVTCKDG-QTNCYQSKSTMRITDCRETgSSKYPNCAYKTTQVEKHIIVACGGK-----PSVPVHFDASV</p> <p><b>SARST:</b> aliSize=94 (resi) RMSD=2.96 (Å)<br/> mkpkgmtssqwfkqhmqpspqa-----CN SAMKNI NKHTKRCKDLNtFLHEPFSSVAATCQTPKIAg-KNgDKNCHOSHGPVSLIMCKLI tsgKY----PNCRVKEKRONKSYVVACKPPqkkdsqqfHLVPVHLDRLV-1<br/> -----kesaaakferqhmdsstsaasssnyCNLMCCRMTQgKCKPVNTFVHESLADKAVCSQKVTCKDGQTCYQSKSTMRITDCRET---TGssky-PNCAYKTTQVEKHIIVACG-----GKPSVPVHFDASV-</p> <p><b>BLAST:</b> aliSize=66 (resi) iden=40.32% (50/124) simi=53.23% (66/124)<br/> mkpkgmtssqw-----FKIQHMOPSPQACNSA-----MKNINHTK-RCKDLNtFLHEPFSSVAATCQTPKIAg-KNgDKNCHOSHGPVSLIMCKLI-SGKYPNCRVKEKRONKSYVVACKPPQKkdsqqfhlVPVHLD---rv1<br/> -----kesaaakFERQHMDSSTSAASSSNYcndMCCRMTQgKCKPVNTFVHESLADKAVCSQKVTCKDGQTCYQSKSTMRITDCRETgSSKYPNCAYKTTQVEKHIIVAC---GGKPS-----VPVHFDASV---</p> <p><b>Proposed:</b> aliSize=113 (resi) RMSD=1.82 (Å)<br/> mkpkmTSSQWFKIQHMOPS--pQ-----ACNSAMK--NINKhtKRCKDLNtFLHEPFSSVAATCQTPKIAg-KNgDKNCHOSHGPVSLIMCKLI-SGKYPNCRVKEKRONKSYVVACKPPqkkdsqqfHLVPVHLDRL<br/> ---K-ESAAAKFERQHMDSSTs-AasssnYCNLMCCrKMTQ--GKCKPVNTFVHESLADKAVCSQKVTCKDG-QTNCYQSKSTMRITDCRETgSSKYPNCAYKTTQVEKHIIVACGGK-----PSVPVHFDASV</p> |
| 890 | <p>1m58A (106)</p> <hr/> <p>1lbgA (124)</p> | N | 23.58 | <p><b>TM-align:</b> aliSize=84 (resi) RMSD=2.47 (Å)<br/> mqnwetfqqkhltdtr-----D-VKCDAEKkALFD---CKQKNTFIYARPGRQALCKNIIV-----SKNVLSTDEFYLSDCNRI-KL---PCHYKLLKSSNTICITCE-N-KLPVHFDVVEecp<br/> -----kesaaakferqhmdsgnspssSNYCNLMCCRMTQgkKCKPVNTFVHESLADKAVG-SQ--kkvtckngqTNCYQSKSTMRITDCRETgSSkypNCAYKTTQVEKHIIVACGgKpSVPVHFDASV---</p> <p><b>SARST:</b> aliSize=98 (resi) RMSD=10.52 (Å)<br/> mqn---WETQKKHLTDTRDV---KCDAEKkALFD---CKQKNTFIYARPGRQALCKNIIVSK-----NVLSTDEFYLSDCNR---IKLCHYK---LKSSNTICITCENKLPVHFDVVEecp<br/> ---kesaAAKFERQHMDSGNSPSSSNYCNLMCCRMTQgkKCKPVNTFVHESLADKAVCSQKVTCKngqTNCYQSKSTMRITDCRETgSSKYPNCAYKTTQVEKHIIVACGGKPSVPVHFDASV---</p> <p><b>BLAST:</b> aliSize=37 (resi) iden=24.53% (26/106) simi=34.91% (37/106)<br/> mqnwetfqqkhltdtrDvkcdaeMkAlfd-----CKQKNTFIYARPGRQALCKNIIVSKN-----VLSDEFYLSDCNRI---KLP---CHYKLLKSSNTICITCENK---LPVHFDV---veecp<br/> -----kesaaakferqhmdsgnspsssnYCNLMCCRMTQgkKCKPVNTFVHESLADKAVCSQKVTCKngqTNCYQSKSTMRITDCRETgSSKYPNCAYKTTQVEKHIIVACGGKpsVPVHFDASV-----</p> <p><b>Proposed:</b> aliSize=97 (resi) RMSD=1.97 (Å)<br/> m--QNWETQKKHLTDTRDV---KCDAEKkALFD---CKQKNTFIYARPGRQALCKNI-----iivsKNVLSTDEFYLSDCNRI-KLP---CHYKLLKSSNTICITCE-N-KLPVHFDVVEecp<br/> -keSAAAKFERQHMDSGNSPSSSNYCNLMCCRMTQgkKCKPVNTFVHESLADKAVG-SqkvtckngqT---NCYQSKSTMRITDCRETgSSkypNCAYKTTQVEKHIIVACGgKpSVPVHFDASV---</p>                                                                                            |

|     |                |   |       |                                                                                                                                                                                                                                                                                                                                                                                                                                                                                                                                                                                                                                                                                                                                                                                                                                                                                                                                                                                                                                                                                                                                                                                                                                                                                                                                                                           |
|-----|----------------|---|-------|---------------------------------------------------------------------------------------------------------------------------------------------------------------------------------------------------------------------------------------------------------------------------------------------------------------------------------------------------------------------------------------------------------------------------------------------------------------------------------------------------------------------------------------------------------------------------------------------------------------------------------------------------------------------------------------------------------------------------------------------------------------------------------------------------------------------------------------------------------------------------------------------------------------------------------------------------------------------------------------------------------------------------------------------------------------------------------------------------------------------------------------------------------------------------------------------------------------------------------------------------------------------------------------------------------------------------------------------------------------------------|
| 891 | 1m58A<br>(106) | N | 23.58 | <p><b>TM-align:</b> aliSize=84 (resi) RMSD=2.31 (Å)<br/> mgnwetfqkxhltdtr-----D-VKDAEMKKALFD---CKQKNTFIYARPGRQALCKNIiv-----SKNVLSTDEFYLSDCNRIK-LP---CHYKLLKSSNTICITCE-N-KLPVHFVAVEecp<br/> -----kesaaakferqhmdsgnsasssNYCNLMCCRKMTqgkCKPVNTFVHESLADKAVG-SQ--kkvtckdgtTNCYQSKSTMRITDCRETGSSkypnCAKTTQVEKHIIVACGgkpsVPVHEDASV----</p> <p><b>SARST:</b> aliSize=82 (resi) RMSD=4.57 (Å)<br/> mgnwetfqkxhltdtrdvk-----CDAEMKKALFD---CKQKNTFIYARPGRQALCKNIIVSK-----NVLSTDEFYLSDCNRI---KLPCHYKLLK---SSNTICITCENKLPVHFVAV--veecp<br/> -----kesaaakferqhmdsgnsasssnycnLMMCCRKMTQgkCKPVNTFVHESLADKAVCSQKKVTCKdgtncYOQSKSTMRITDCRETgsskypnCAKTTQVEKHIIVACGGKPSVPVHEDASV----</p> <p><b>BLAST:</b> aliSize=36 (resi) iden=24.53% (26/106) simi=33.96% (36/106)<br/> mgnwetfqkxhltdtrdvkcdaemkkalfd-----CKQKNTFIYARPGRQALCKNIIVSK---VL-STDEFYLSDCNRI---KLP---CHYKLLKSSNTICITCENK---LPVHFVAV--veecp<br/> -----kesaaakferqhmdsgnsasssnycnlmmccrkmTqgkCKPVNTFVHESLADKAVGsqkVKTCKDggtCYqSKSTMRITDCRETgsskypnCAKTTQVEKHIIVACGGkpsVPVHEDASV----</p> <p><b>Proposed:</b> aliSize=99 (resi) RMSD=2.06 (Å)<br/> -MQNWETQKKHLT-DTRD---VKDAEMKK-ALFD---CKQKNTFIYARPGRQALCKNI-----iivSKNVLSTDEFYLSDCNRIK-LP---CHYKLLKSSNTICITCEN--KLPVHFVAVEecp<br/> kESAAAKFEROHMDSGNSASSsNYCNLMCCRKMTQgkCKPVNTFVHESLADKAVG-Sqkvtckdgt---TNCYQSKSTMRITDCRETGSSkypnCAKTTQVEKHIIVACGGkpsVPVHEDASV----</p>           |
| 892 | 1m58A<br>(106) | N | 23.58 | <p><b>TM-align:</b> aliSize=84 (resi) RMSD=2.46 (Å)<br/> mgnwetfqkxhltdtr-----D-VKDAEMKKALFD---CKQKNTFIYARPGRQALCKNIiv-----SKNVLSTDEFYLSDCNRI-KL---PCHYKLLKSSNTICITCE-N-KLPVHFVAVEecp<br/> -----kesaaakferqhmdsgnsasssNYCNQMMCCRKMTqgkCKPVNTFVHESLADKAVG-SQ--kkvtckdgtTNCYQSKSTMRITDCRETGSSkypnCAKTTQVEKHIIVACGgkpsVPVHEDASV----</p> <p><b>SARST:</b> aliSize=99 (resi) RMSD=10.26 (Å)<br/> mgn---WETQKKHL--TDTRDVK---CDAEMKKALFDC-----CKQKNTFIYARPGRQALCKNIIVSK-----NVLSTDEFYLSDCNRI---KLPCHYKLLK---SSNTICITCENKLPVHFVAV--veecp<br/> ---kesAAKFEROHMDSGNSASSsNYCNQMMCCRKMTqgkCKPVNTFVHESLADKAVCSQKKVTCKdgtncYOQSKSTMRITDCRETgsskypnCAKTTQVEKHIIVACGGKPSVPVHEDASV----</p> <p><b>BLAST:</b> aliSize=36 (resi) iden=24.53% (26/106) simi=33.96% (36/106)<br/> mgnwetfqkxhltdtrdvkcdaemkkalfd-----CKQKNTFIYARPGRQALCKNIIVSK---VL-STDEFYLSDCNRI---KLP---CHYKLLKSSNTICITCENK---LPVHFVAV--veecp<br/> -----kesaaakferqhmdsgnsasssnycnqmmccrkmTqgkCKPVNTFVHESLADKAVGsqkVKTCKDggtCYqSKSTMRITDCRETgsskypnCAKTTQVEKHIIVACGGkpsVPVHEDASV----</p> <p><b>Proposed:</b> aliSize=98 (resi) RMSD=2.08 (Å)<br/> -MQNWETQKKHLTDTRDV---KDAEMKK-ALFD---CKQKNTFIYARPGRQALCKNI-----iivSKNVLSTDEFYLSDCNRI-KLP---CHYKLLKSSNTICITCE--KLPVHFVAVEecp<br/> kESAAAKFEROHMDSGNSASSsNYCNQMMCCRKMTQgkCKPVNTFVHESLADKAVG-Sqkvtckdgt---TNCYQSKSTMRITDCRETGSSkypnCAKTTQVEKHIIVACGgkpsVPVHEDASV----</p>        |
| 893 | 1m58A<br>(106) | N | 23.58 | <p><b>TM-align:</b> aliSize=84 (resi) RMSD=2.41 (Å)<br/> mgnwetfqkxhltdtr-----D-VKDAEMKKALFD---CKQKNTFIYARPGRQALCKNIiv-----SKNVLSTDEFYLSDCNRI-KLP---CHYKLLKSSNTICITCE-N-KLPVHFVAVEecp<br/> -----kesaaakferqhmdsstsaasNYCNLMCCRKMTqgkCKPVNTFVHESLADKAVG-SQ--kkvtckdgtTNCYQSKSTMRITDCRETGSSkypnCAKTTQVEKHIIVACGgkpsVPVHEDASV----</p> <p><b>SARST:</b> aliSize=93 (resi) RMSD=11.43 (Å)<br/> mgn---WETQKKHL--TDTRDVK---CDAEMKKALFDC-----CKQKNTFIYARPGRQALCKNIIVSK-----NVLSTDEFYLSDCNRI---KLPCHYKLLK-----SSNTICITCENKLPVHFVAV--veecp<br/> ---kesAAKFEROHMDSSTSAASSsNYCNLMCCRKMTqgkCKPVNTFVHESLADKAVCSQKKVTCKdgtncYOQSKSTMRITDCRETgsskypnCAKTTQVEKHIIVACGGKPS---VPVHEDASV----</p> <p><b>BLAST:</b> aliSize=47 (resi) iden=29.25% (31/106) simi=44.34% (47/106)<br/> mgnwet-----QKKHLTDTRDVK---DAEM---KALFDCKQKNTFIYARPGRQALCKNIIVSK---VL-STDEFYLSDCNRI---KLP---CHYKLLKSSNTICITCENK---LPVHFVAV--veecp<br/> -----kesaaakFEROHMDSSTSAASSsnyCNLMCCRKMTQgkCKPVNTFVHESLADKAVGsqkVKTCKDggtCYqSKSTMRITDCRETgsskypnCAKTTQVEKHIIVACGGkpsVPVHEDASV----</p> <p><b>Proposed:</b> aliSize=98 (resi) RMSD=2.02 (Å)<br/> -MQNWETQKKHLTDTRDV---KDAEMKK-ALFD---CKQKNTFIYARPGRQALCKNI-----iivSKNVLSTDEFYLSDCNRI-KLP---CHYKLLKSSNTICITCE-N-KLPVHFVAVEecp<br/> kESAAAKFEROHMDSSTSAASSsNYCNLMCCRKMTQgkCKPVNTFVHESLADKAVG-Sqkvtckdgt---TNCYQSKSTMRITDCRETGSSkypnCAKTTQVEKHIIVACGgkpsVPVHEDASV----</p> |

|     |                                                     |   |       |                                                                                                                                                                                                                                                                                                                                                                                                                                                                                                                                                                                                                                                                                                                                                                                                                                                                                                                                                                                                                                                                                                                                                                                                                                                                                                                                       |
|-----|-----------------------------------------------------|---|-------|---------------------------------------------------------------------------------------------------------------------------------------------------------------------------------------------------------------------------------------------------------------------------------------------------------------------------------------------------------------------------------------------------------------------------------------------------------------------------------------------------------------------------------------------------------------------------------------------------------------------------------------------------------------------------------------------------------------------------------------------------------------------------------------------------------------------------------------------------------------------------------------------------------------------------------------------------------------------------------------------------------------------------------------------------------------------------------------------------------------------------------------------------------------------------------------------------------------------------------------------------------------------------------------------------------------------------------------|
| 894 | <p>2e0oB<br/>(125)</p> <hr/> <p>1lbgA<br/>(124)</p> | N | 69.35 | <p><b>TM-align:</b> aliSize=104 (resi) RMSD=1.10 (Å)<br/> mkesrakkfqrqhmdsdspss-----SSSYTCNQIMRRNMTQGRCKPVNTFVHEPILLVQLVCLQEKVTCKNGGNCYKSNSSMHTDCRLTNGSRYPNCAYRTSPKERHIVACEGSPYVPVHFDASV<br/> -----kesaaakferqhmdsgnspssSSSYTCNLMCCRKMTQGRCKPVNTFVHESLADVKAVCSOKKVTCKNGGTCYQSKSTMRTDCREIGSSKYPNCAYKITQVEKHLIVACGGKPSVPVHFDASV</p> <p><b>SARST:</b> aliSize=122 (resi) RMSD=9.84 (Å)<br/> mk-ESRKKFQROHMDSDSPSSSYTCNQIMRRNMTQGRCKPVNTFVHEPILLVQLVCLQEKVTCKNGGNCYKSNSSMHTDCRLTNGSRYPNCAYRTSPKERHIVACEGSPYVPVHFDASV-v<br/> --kESAIAKFEROHMDSGNSPSSSYTCNLMCCRKMTQGRCKPVNTFVHESLADVKAVCSOKKVTCKNGGTCYQSKSTMRTDCREIGSSKYPNCAYKITQVEKHLIVACGGKPSVPVHFDASV-v</p> <p><b>BLAST:</b> aliSize=100 (resi) iden=71.77% (89/124) simi=80.65% (100/124)<br/> mKESRKKFQROHMDSDSPSSSYTCNQIMRRNMTQGRCKPVNTFVHEPILLVQLVCLQEKVTCKNGGNCYKSNSSMHTDCRLTNGSRYPNCAYRTSPKERHIVACEGSPYVPVHFDASV<br/> -KESAIAKFEROHMDSGNSPSSSYTCNLMCCRKMTQGRCKPVNTFVHESLADVKAVCSOKKVTCKNGGTCYQSKSTMRTDCREIGSSKYPNCAYKITQVEKHLIVACGGKPSVPVHFDASV</p> <p><b>Proposed:</b> aliSize=123 (resi) RMSD=1.01 (Å)<br/> mKESRKKFQROHMDSDSPSS-SSSYTCNQIMRRNMTQGRCKPVNTFVHEPILLVQLVCLQEKVTCKNGGNCYKSNSSMHTDCRLTNGSRYPNCAYRTSPKERHIVACEGSPYVPVHFDASV<br/> -KESAIAKFEROHMDS-GNSPSSSYTCNLMCCRKMTQGRCKPVNTFVHESLADVKAVCSOKKVTCKNGGTCYQSKSTMRTDCREIGSSKYPNCAYKITQVEKHLIVACGGKPSVPVHFDASV</p>        |
| 895 | <p>2e0oB<br/>(125)</p> <hr/> <p>1y92B<br/>(124)</p> | N | 70.16 | <p><b>TM-align:</b> aliSize=104 (resi) RMSD=0.92 (Å)<br/> mkesrakkfqrqhmdsdspss-----SSSYTCNQIMRRNMTQGRCKPVNTFVHEPILLVQLVCLQEKVTCKNGGNCYKSNSSMHTDCRLTNGSRYPNCAYRTSPKERHIVACEGSPYVPVHFDASV<br/> -----kesaaakferqhmdsgnsasSSSYTCNLMCCRKMTQGRCKPVNTFVHESLADVKAVCSOKKVTCKNGGTCYQSKSTMRTDCREIGSSKYPNCAYKITQVEKHLIVACGGKPSVPVHFDASV</p> <p><b>SARST:</b> aliSize=122 (resi) RMSD=9.65 (Å)<br/> mk-ESRKKFQROHMDSDSPSSSYTCNQIMRRNMTQGRCKPVNTFVHEPILLVQLVCLQEKVTCKNGGNCYKSNSSMHTDCRLTNGSRYPNCAYRTSPKERHIVACEGSPYVPVHFDASV-v<br/> --kESAIAKFEROHMDSGNASSSSYTCNLMCCRKMTQGRCKPVNTFVHESLADVKAVCSOKKVTCKNGGTCYQSKSTMRTDCREIGSSKYPNCAYKITQVEKHLIVACGGKPSVPVHFDASV-v</p> <p><b>BLAST:</b> aliSize=99 (resi) iden=70.16% (87/124) simi=79.84% (99/124)<br/> mKESRKKFQROHMDSDSPSSSYTCNQIMRRNMTQGRCKPVNTFVHEPILLVQLVCLQEKVTCKNGGNCYKSNSSMHTDCRLTNGSRYPNCAYRTSPKERHIVACEGSPYVPVHFDASV<br/> -KESAIAKFEROHMDSGNASSSSYTCNLMCCRKMTQGRCKPVNTFVHESLADVKAVCSOKKVTCKNGGTCYQSKSTMRTDCREIGSSKYPNCAYKITQVEKHLIVACGGKPSVPVHFDASV</p> <p><b>Proposed:</b> aliSize=124 (resi) RMSD=0.89 (Å)<br/> mKESRKKFQROHMDSDSPSSSYTCNQIMRRNMTQGRCKPVNTFVHEPILLVQLVCLQEKVTCKNGGNCYKSNSSMHTDCRLTNGSRYPNCAYRTSPKERHIVACEGSPYVPVHFDASV<br/> -KESAIAKFEROHMDSGNASSSSYTCNLMCCRKMTQGRCKPVNTFVHESLADVKAVCSOKKVTCKNGGTCYQSKSTMRTDCREIGSSKYPNCAYKITQVEKHLIVACGGKPSVPVHFDASV</p>               |
| 896 | <p>2e0oB<br/>(125)</p> <hr/> <p>3bcoA<br/>(124)</p> | N | 69.35 | <p><b>TM-align:</b> aliSize=104 (resi) RMSD=1.07 (Å)<br/> mkesrakkfqrqhmdsdspss-----SSSYTCNQIMRRNMTQGRCKPVNTFVHEPILLVQLVCLQEKVTCKNGGNCYKSNSSMHTDCRLTNGSRYPNCAYRTSPKERHIVACEGSPYVPVHFDASV<br/> -----kesaaakferqhmdsgnsasSSSYTCNQIMCCRKMTQGRCKPVNTFVHESLADVKAVCSOKKVTCKNGGTCYQSKSTMRTDCREIGSSKYPNCAYKITQVEKHLIVACGGKPSVPVHFDASV</p> <p><b>SARST:</b> aliSize=120 (resi) RMSD=9.46 (Å)<br/> mk-ESRKKFQROHMDSDSPSS--SYTCNQIMRRNMTQGRCKPVNTFVHEPILLVQLVCLQEKVTCKNGGNCYKSNSSMHTDCRLTNGSRYPNCAYRTSPKERHIVACEGSPYVPVHFDASV-v<br/> --kESAIAKFEROHMDS--GNASSSSYTCNQIMCCRKMTQGRCKPVNTFVHESLADVKAVCSOKKVTCKNGGTCYQSKSTMRTDCREIGSSKYPNCAYKITQVEKHLIVACGGKPSVPVHFDASV-v</p> <p><b>BLAST:</b> aliSize=100 (resi) iden=70.97% (88/124) simi=80.65% (100/124)<br/> mKESRKKFQROHMDSDSPSSSYTCNQIMRRNMTQGRCKPVNTFVHEPILLVQLVCLQEKVTCKNGGNCYKSNSSMHTDCRLTNGSRYPNCAYRTSPKERHIVACEGSPYVPVHFDASV<br/> -KESAIAKFEROHMDSGNASSSSYTCNQIMCCRKMTQGRCKPVNTFVHESLADVKAVCSOKKVTCKNGGTCYQSKSTMRTDCREIGSSKYPNCAYKITQVEKHLIVACGGKPSVPVHFDASV</p> <p><b>Proposed:</b> aliSize=123 (resi) RMSD=0.93 (Å)<br/> mKESRKKFQROHMDSDSPSS-SSSYTCNQIMRRNMTQGRCKPVNTFVHEPILLVQLVCLQEKVTCKNGGNCYKSNSSMHTDCRLTNGSRYPNCAYRTSPKERHIVACEGSPYVPVHFDASV<br/> -KESAIAKFEROHMDS-GNSASSSYTCNQIMCCRKMTQGRCKPVNTFVHESLADVKAVCSOKKVTCKNGGTCYQSKSTMRTDCREIGSSKYPNCAYKITQVEKHLIVACGGKPSVPVHFDASV</p> |

|     |                                                     |   |       |                                                                                                                                                                                                                                                                                                                                                                                                                                                                                                                                                                                                                                                                                                                                                                                                                                                                                                                                                                                                                                                                                                                                                                                                                                                                                                                                                          |
|-----|-----------------------------------------------------|---|-------|----------------------------------------------------------------------------------------------------------------------------------------------------------------------------------------------------------------------------------------------------------------------------------------------------------------------------------------------------------------------------------------------------------------------------------------------------------------------------------------------------------------------------------------------------------------------------------------------------------------------------------------------------------------------------------------------------------------------------------------------------------------------------------------------------------------------------------------------------------------------------------------------------------------------------------------------------------------------------------------------------------------------------------------------------------------------------------------------------------------------------------------------------------------------------------------------------------------------------------------------------------------------------------------------------------------------------------------------------------|
| 897 | <p>2e0oB<br/>(125)</p> <hr/> <p>1y94A<br/>(124)</p> | N | 68.55 | <p><b>TM-align:</b> aliSize=104 (resi) RMSD=1.12 (Å)<br/> mkesrakkfqrqhmdsdsps-----SSSYTCNQIMRRNMTQGRCKPVNTFVHEPILLVQLVCLQEKVTCKNGGNCYKSNSSMHI TDCRLTNGSRYPCAYRTSPKERHIIVACEISYYPVHFDA SV<br/> -----kesaaakferqhmdsstaaSSSYTCNLMCCRKMTQGRCKPVNTFVHESLADVKAVCSOKKVTCKDGTNCYQSKSTMRI TDCREI GSSKYPNCAYKTTQVEKHIIVACGGKPSVPVHFDA SV</p> <p><b>SARST:</b> aliSize=120 (resi) RMSD=9.46 (Å)<br/> mk-ESRKKFQROHMDSDSSPS--SSSYTCNQIMRRNMTQGRCKPVNTFVHEPILLVQLVCLQEKVTCKNGGNCYKSNSSMHI TDCRLTNGSRYPCAYRTSPKERHIIVACEISYYPVHFDA S-v<br/> --kESAAKFEROHMD--SSTsaaSSSYTCNLMCCRKMTQGRCKPVNTFVHESLADVKAVCSOKKVTCKDGTNCYQSKSTMRI TDCREI GSSKYPNCAYKTTQVEKHIIVACGGKPSVPVHFDA Sv-</p> <p><b>BLAST:</b> aliSize=99 (resi) iden=69.35% (86/124) simi=79.84% (99/124)<br/> mKESRKKFQROHMDSDSSPSSTSYTCNQIMRRNMTQGRCKPVNTFVHEPILLVQLVCLQEKVTCKNGGNCYKSNSSMHI TDCRLTNGSRYPCAYRTSPKERHIIVACEISYYPVHFDA SV<br/> -KESAAKFEROHMDSSTSAASSSYTCNLMCCRKMTQGRCKPVNTFVHESLADVKAVCSOKKVTCKDGTNCYQSKSTMRI TDCREI GSSKYPNCAYKTTQVEKHIIVACGGKPSVPVHFDA SV</p> <p><b>Proposed:</b> aliSize=123 (resi) RMSD=0.98 (Å)<br/> mKESRKKFQROHMDSDSSPS-sSSSYTCNQIMRRNMTQGRCKPVNTFVHEPILLVQLVCLQEKVTCKNGGNCYKSNSSMHI TDCRLTNGSRYPCAYRTSPKERHIIVACEISYYPVHFDA SV<br/> -KESAAKFEROHMDSSTSAAs-SSNYCNLMCCRKMTQGRCKPVNTFVHESLADVKAVCSOKKVTCKDGTNCYQSKSTMRI TDCREI GSSKYPNCAYKTTQVEKHIIVACGGKPSVPVHFDA SV</p> |
| 898 | <p>1ymnA<br/>(124)</p> <hr/> <p>1lbgA<br/>(124)</p> | N | 80.65 | <p><b>TM-align:</b> aliSize=104 (resi) RMSD=1.07 (Å)<br/> ketaaakferqhmdsstaa-----SSSYTCNQIMKSNLTKDRCKPVNTFVHESLADVQAVCSQKNVACKNGOTNCYQSYSTMSITDCRETGSSKLPNCAYKTTQANKHIIVACEINFPVHFDA SV<br/> -----kesaaakferqhmdsgnspSSSYTCNLMCCRKMTQGRCKPVNTFVHESLADVKAVCSQKNVACKNGOTNCYQSKSTMRI TDCRETGSSKYPNCAYKTTQVEKHIIVACGGKPSVPVHFDA SV</p> <p><b>SARST:</b> aliSize=121 (resi) RMSD=9.81 (Å)<br/> k-ETAAAKFEROHMDS-STSAASSSYTCNQIMKSNLTKDRCKPVNTFVHESLADVQAVCSQKNVACKNGOTNCYQSYSTMSITDCRETGSSKLPNCAYKTTQANKHIIVACEINFPVHFDA S-v<br/> -kESAAAKFEROHMDSGNSPSSS-SNYCNLMCCRKMTQGRCKPVNTFVHESLADVKAVCSQKNVACKNGOTNCYQSKSTMRI TDCRETGSSKYPNCAYKTTQVEKHIIVACGGKPSVPVHFDA Sv-</p> <p><b>BLAST:</b> aliSize=106 (resi) iden=80.65% (100/124) simi=85.48% (106/124)<br/> KETAAAKFEROHMDSSTSAASSSYTCNQIMKSNLTKDRCKPVNTFVHESLADVQAVCSQKNVACKNGOTNCYQSYSTMSITDCRETGSSKLPNCAYKTTQANKHIIVACEINFPVHFDA SV<br/> KESAAAKFEROHMDSGNSPSSS-SNYCNLMCCRKMTQGRCKPVNTFVHESLADVKAVCSQKNVACKNGOTNCYQSKSTMRI TDCRETGSSKYPNCAYKTTQVEKHIIVACGGKPSVPVHFDA SV</p> <p><b>Proposed:</b> aliSize=124 (resi) RMSD=1.10 (Å)<br/> KETAAAKFEROHMDSSTSAASSSYTCNQIMKSNLTKDRCKPVNTFVHESLADVQAVCSQKNVACKNGOTNCYQSYSTMSITDCRETGSSKLPNCAYKTTQANKHIIVACEINFPVHFDA SV<br/> KESAAAKFEROHMDSGNSPSSS-SNYCNLMCCRKMTQGRCKPVNTFVHESLADVKAVCSQKNVACKNGOTNCYQSKSTMRI TDCRETGSSKYPNCAYKTTQVEKHIIVACGGKPSVPVHFDA SV</p>  |
| 899 | <p>1ymnA<br/>(124)</p> <hr/> <p>1y92B<br/>(124)</p> | N | 80.65 | <p><b>TM-align:</b> aliSize=104 (resi) RMSD=0.94 (Å)<br/> ketaaakferqhmdsstaa-----SSSYTCNQIMKSNLTKDRCKPVNTFVHESLADVQAVCSQKNVACKNGOTNCYQSYSTMSITDCRETGSSKLPNCAYKTTQANKHIIVACEINFPVHFDA SV<br/> -----kesaaakferqhmdsgnsasSSSYTCNLMCCRKMTQGRCKPVNTFVHESLADVKAVCSQKNVACKNGOTNCYQSKSTMRI TDCRETGSSKYPNCAYKTTQVEKHIIVACGGKPSVPVHFDA SV</p> <p><b>SARST:</b> aliSize=122 (resi) RMSD=9.71 (Å)<br/> k-ETAAAKFEROHMDSSTSAASSSYTCNQIMKSNLTKDRCKPVNTFVHESLADVQAVCSQKNVACKNGOTNCYQSYSTMSITDCRETGSSKLPNCAYKTTQANKHIIVACEINFPVHFDA S-v<br/> -kESAAAKFEROHMDSGNSASSS-SNYCNLMCCRKMTQGRCKPVNTFVHESLADVKAVCSQKNVACKNGOTNCYQSKSTMRI TDCRETGSSKYPNCAYKTTQVEKHIIVACGGKPSVPVHFDA Sv-</p> <p><b>BLAST:</b> aliSize=107 (resi) iden=80.65% (100/124) simi=86.29% (107/124)<br/> KETAAAKFEROHMDSSTSAASSSYTCNQIMKSNLTKDRCKPVNTFVHESLADVQAVCSQKNVACKNGOTNCYQSYSTMSITDCRETGSSKLPNCAYKTTQANKHIIVACEINFPVHFDA SV<br/> KESAAAKFEROHMDSGNSASSS-SNYCNLMCCRKMTQGRCKPVNTFVHESLADVKAVCSQKNVACKNGOTNCYQSKSTMRI TDCRETGSSKYPNCAYKTTQVEKHIIVACGGKPSVPVHFDA SV</p> <p><b>Proposed:</b> aliSize=124 (resi) RMSD=0.99 (Å)<br/> KETAAAKFEROHMDSSTSAASSSYTCNQIMKSNLTKDRCKPVNTFVHESLADVQAVCSQKNVACKNGOTNCYQSYSTMSITDCRETGSSKLPNCAYKTTQANKHIIVACEINFPVHFDA SV<br/> KESAAAKFEROHMDSGNSASSS-SNYCNLMCCRKMTQGRCKPVNTFVHESLADVKAVCSQKNVACKNGOTNCYQSKSTMRI TDCRETGSSKYPNCAYKTTQVEKHIIVACGGKPSVPVHFDA SV</p>  |

|     |                |   |       |                                                                                                                                                                                                                                                                                                                                                                                                                                                                                                                                                                                                                                                                                                                                                                                                                                                                                                                                                                                                                                                                                                                                                                                                                                                                                                                               |
|-----|----------------|---|-------|-------------------------------------------------------------------------------------------------------------------------------------------------------------------------------------------------------------------------------------------------------------------------------------------------------------------------------------------------------------------------------------------------------------------------------------------------------------------------------------------------------------------------------------------------------------------------------------------------------------------------------------------------------------------------------------------------------------------------------------------------------------------------------------------------------------------------------------------------------------------------------------------------------------------------------------------------------------------------------------------------------------------------------------------------------------------------------------------------------------------------------------------------------------------------------------------------------------------------------------------------------------------------------------------------------------------------------|
| 900 | lymnA<br>(124) | N | 81.45 | <p>TM-align: aliSize=104 (resi) RMSD=1.12 (Å)</p> <p>ketaaakferqhmdsstaa-----SSSNYCNQMMKSRNLTKDRCKPVNTFVHESLADVQAVCSQKNVACKNGOTNCYQSYSTMSTIDCRETGSSKLPNCAYKTTQANKHIIVACEINPYVPVHFDASV<br/> -----kesaaakferqhmdsgnsasSSSNYCNQMMCCRKMTQCKPNTFVHESLADVQAVCSQKNVACKNGOTNCYQSKSTMRIIDCRETGSSKYPNCAYKTTQVEKHIIVACGGKPSVPVHFDASV</p> <p>SARST: aliSize=118 (resi) RMSD=9.26 (Å)</p> <p>k-ETAAAKFERQHMD---SSTSaassSNYCNQMMKSRNLTKDRCKPVNTFVHESLADVQAVCSQKNVACKNGOTNCYQSYSTMSTIDCRETGSSKLPNCAYKTTQANKHIIVACEINPYVPVHFDAS-v<br/> -kESAAAKFERQHMDsgnsASS---SNYCNQMMCCRKMTQCKPNTFVHESLADVQAVCSQKNVACKNGOTNCYQSKSTMRIIDCRETGSSKYPNCAYKTTQVEKHIIVACGGKPSVPVHFDASv-</p> <p>BLAST: aliSize=108 (resi) iden=81.45% (101/124) simi=87.10% (108/124)</p> <p>KEETAAAKFERQHMDSSTSAASSSNYCNQMMKSRNLTKDRCKPVNTFVHESLADVQAVCSQKNVACKNGOTNCYQSYSTMSTIDCRETGSSKLPNCAYKTTQANKHIIVACEINPYVPVHFDASV<br/> KESAAAKFERQHMDSGNSASSSNYCNQMMCCRKMTQCKPNTFVHESLADVQAVCSQKNVACKNGOTNCYQSKSTMRIIDCRETGSSKYPNCAYKTTQVEKHIIVACGGKPSVPVHFDASV</p> <p>Proposed: aliSize=124 (resi) RMSD=1.09 (Å)</p> <p>KEETAAAKFERQHMDSSTSAASSSNYCNQMMKSRNLTKDRCKPVNTFVHESLADVQAVCSQKNVACKNGOTNCYQSYSTMSTIDCRETGSSKLPNCAYKTTQANKHIIVACEINPYVPVHFDASV<br/> KESAAAKFERQHMDSGNSASSSNYCNQMMCCRKMTQCKPNTFVHESLADVQAVCSQKNVACKNGOTNCYQSKSTMRIIDCRETGSSKYPNCAYKTTQVEKHIIVACGGKPSVPVHFDASV</p> |
|     | 3bcoA<br>(124) |   |       |                                                                                                                                                                                                                                                                                                                                                                                                                                                                                                                                                                                                                                                                                                                                                                                                                                                                                                                                                                                                                                                                                                                                                                                                                                                                                                                               |
| 901 | lymnA<br>(124) | N | 83.06 | <p>TM-align: aliSize=104 (resi) RMSD=1.17 (Å)</p> <p>ketaaakferqhmdsstaa-----SSSNYCNQMMKSRNLTKDRCKPVNTFVHESLADVQAVCSQKNVACKNGOTNCYQSYSTMSTIDCRETGSSKLPNCAYKTTQANKHIIVACEINPYVPVHFDASV<br/> -----kesaaakferqhmdsstaaSSSNYCNLMCCRKMTQCKPNTFVHESLADVQAVCSQKNVACKNGOTNCYQSKSTMRIIDCRETGSSKYPNCAYKTTQVEKHIIVACGGKPSVPVHFDASV</p> <p>SARST: aliSize=121 (resi) RMSD=9.62 (Å)</p> <p>k-ETAAAKFERQHMDS-STSAASSSNYCNQMMKSRNLTKDRCKPVNTFVHESLADVQAVCSQKNVACKNGOTNCYQSYSTMSTIDCRETGSSKLPNCAYKTTQANKHIIVACEINPYVPVHFDAS-v<br/> -kESAAAKFERQHMDSsTSAASS-SNYCNLMCCRKMTQCKPNTFVHESLADVQAVCSQKNVACKNGOTNCYQSKSTMRIIDCRETGSSKYPNCAYKTTQVEKHIIVACGGKPSVPVHFDASv-</p> <p>BLAST: aliSize=109 (resi) iden=83.06% (103/124) simi=87.90% (109/124)</p> <p>KEETAAAKFERQHMDSSTSAASSSNYCNQMMKSRNLTKDRCKPVNTFVHESLADVQAVCSQKNVACKNGOTNCYQSYSTMSTIDCRETGSSKLPNCAYKTTQANKHIIVACEINPYVPVHFDASV<br/> KESAAAKFERQHMDSSTSAASSSNYCNLMCCRKMTQCKPNTFVHESLADVQAVCSQKNVACKNGOTNCYQSKSTMRIIDCRETGSSKYPNCAYKTTQVEKHIIVACGGKPSVPVHFDASV</p> <p>Proposed: aliSize=124 (resi) RMSD=1.15 (Å)</p> <p>KEETAAAKFERQHMDSSTSAASSSNYCNQMMKSRNLTKDRCKPVNTFVHESLADVQAVCSQKNVACKNGOTNCYQSYSTMSTIDCRETGSSKLPNCAYKTTQANKHIIVACEINPYVPVHFDASV<br/> KESAAAKFERQHMDSSTSAASSSNYCNLMCCRKMTQCKPNTFVHESLADVQAVCSQKNVACKNGOTNCYQSKSTMRIIDCRETGSSKYPNCAYKTTQVEKHIIVACGGKPSVPVHFDASV</p>       |
|     | 1y94A<br>(124) |   |       |                                                                                                                                                                                                                                                                                                                                                                                                                                                                                                                                                                                                                                                                                                                                                                                                                                                                                                                                                                                                                                                                                                                                                                                                                                                                                                                               |
| 902 | 1a5pA<br>(124) | N | 79.84 | <p>TM-align: aliSize=104 (resi) RMSD=0.84 (Å)</p> <p>ketaaakferqhmdsstaa-----SSSNYCNQMMKSRNLTKDRAPVNTFVHESLADVQAVCSQKNVACKNGOTNCYQSYSTMSTIDCRETGSSKYPNAAYKTTQANKHIIVACEINPYVPVHFDASV<br/> -----kesaaakferqhmdsgnspSSSNYCNLMCCRKMTQCKPNTFVHESLADVQAVCSQKNVACKNGOTNCYQSKSTMRIIDCRETGSSKYPNCAYKTTQVEKHIIVACGGKPSVPVHFDASV</p> <p>SARST: aliSize=121 (resi) RMSD=9.75 (Å)</p> <p>k-ETAAAKFERQHMDS-STSAASSSNYCNQMMKSRNLTKDRAPVNTFVHESLADVQAVCSQKNVACKNGOTNCYQSYSTMSTIDCRETGSSKYPNAAYKTTQANKHIIVACEINPYVPVHFDAS-v<br/> -kESAAAKFERQHMDSgNSPSSS-SNYCNLMCCRKMTQCKPNTFVHESLADVQAVCSQKNVACKNGOTNCYQSKSTMRIIDCRETGSSKYPNCAYKTTQVEKHIIVACGGKPSVPVHFDASv-</p> <p>BLAST: aliSize=105 (resi) iden=79.84% (99/124) simi=84.68% (105/124)</p> <p>KEETAAAKFERQHMDSSTSAASSSNYCNQMMKSRNLTKDRAPVNTFVHESLADVQAVCSQKNVACKNGOTNCYQSYSTMSTIDCRETGSSKYPNAAYKTTQANKHIIVACEINPYVPVHFDASV<br/> KESAAAKFERQHMDSGNSPSSSNYCNLMCCRKMTQCKPNTFVHESLADVQAVCSQKNVACKNGOTNCYQSKSTMRIIDCRETGSSKYPNCAYKTTQVEKHIIVACGGKPSVPVHFDASV</p> <p>Proposed: aliSize=124 (resi) RMSD=0.91 (Å)</p> <p>KEETAAAKFERQHMDSSTSAASSSNYCNQMMKSRNLTKDRAPVNTFVHESLADVQAVCSQKNVACKNGOTNCYQSYSTMSTIDCRETGSSKYPNAAYKTTQANKHIIVACEINPYVPVHFDASV<br/> KESAAAKFERQHMDSGNSPSSSNYCNLMCCRKMTQCKPNTFVHESLADVQAVCSQKNVACKNGOTNCYQSKSTMRIIDCRETGSSKYPNCAYKTTQVEKHIIVACGGKPSVPVHFDASV</p>              |
|     | 1lbgA<br>(124) |   |       |                                                                                                                                                                                                                                                                                                                                                                                                                                                                                                                                                                                                                                                                                                                                                                                                                                                                                                                                                                                                                                                                                                                                                                                                                                                                                                                               |

|     |                |   |       |                                                                                                                                                                                                                                                                                                                                                                                                                                                                                                                                                                                                                                                                                                                                                                                                                                                                                                                                                                                                                                                                                                                                                                                                                                                                                                                                                                                             |
|-----|----------------|---|-------|---------------------------------------------------------------------------------------------------------------------------------------------------------------------------------------------------------------------------------------------------------------------------------------------------------------------------------------------------------------------------------------------------------------------------------------------------------------------------------------------------------------------------------------------------------------------------------------------------------------------------------------------------------------------------------------------------------------------------------------------------------------------------------------------------------------------------------------------------------------------------------------------------------------------------------------------------------------------------------------------------------------------------------------------------------------------------------------------------------------------------------------------------------------------------------------------------------------------------------------------------------------------------------------------------------------------------------------------------------------------------------------------|
| 903 | 1a5pA<br>(124) | N | 79.84 | <p>TM-align: aliSize=104 (resi) RMSD=0.81 (Å)</p> <p>ketaaakferqhmds <b>tsaa</b>-----SSSNYCNQMMKSRNLTKDRAKPVNTFVHESLADVQAVCSQKNVACKNGOTNCYQSYSTMSITDCRETGSSKYPNAAYKTTQANKHIIVACEINIFYVPVHFDASV<br/> -----kesaaakferqhmdsgnsasSSSNYCNLMCCRKMTQGGCKPVNTFVHESLADVQAVCSQKNVACKNGOTNCYQSKSTMRIIDCRETGSSKYPNCAYKTTQVEKHIIVACGGKPSVPVHFDASV</p> <p>SARST: aliSize=122 (resi) RMSD=9.66 (Å)</p> <p>k-ETAAAKFERQHMD<b>S</b>STAASSSNYCNQMMKSRNLTKDRAKPVNTFVHESLADVQAVCSQKNVACKNGOTNCYQSYSTMSITDCRETGSSKYPNAAYKTTQANKHIIVACEINIFYVPVHFDAS-v<br/> -kESAAAKFERQHMD<b>S</b>NSASSSNYCNLMCCRKMTQGGCKPVNTFVHESLADVQAVCSQKNVACKNGOTNCYQSKSTMRIIDCRETGSSKYPNCAYKTTQVEKHIIVACGGKPSVPVHFDASv-</p> <p>BLAST: aliSize=106 (resi) iden=79.84% (99/124) simi=85.48% (106/124)</p> <p>KEETAAAKFERQHMD<b>S</b>STAASSSNYCNQMMKSRNLTKDRAKPVNTFVHESLADVQAVCSQKNVACKNGOTNCYQSYSTMSITDCRETGSSKYPNAAYKTTQANKHIIVACEINIFYVPVHFDASV<br/> KESAAAKFERQHMD<b>S</b>NSASSSNYCNLMCCRKMTQGGCKPVNTFVHESLADVQAVCSQKNVACKNGOTNCYQSKSTMRIIDCRETGSSKYPNCAYKTTQVEKHIIVACGGKPSVPVHFDASV</p> <p>Proposed: aliSize=124 (resi) RMSD=0.89 (Å)</p> <p>KEETAAAKFERQHMD<b>S</b>STAASSSNYCNQMMKSRNLTKDRAKPVNTFVHESLADVQAVCSQKNVACKNGOTNCYQSYSTMSITDCRETGSSKYPNAAYKTTQANKHIIVACEINIFYVPVHFDASV<br/> KESAAAKFERQHMD<b>S</b>NSASSSNYCNLMCCRKMTQGGCKPVNTFVHESLADVQAVCSQKNVACKNGOTNCYQSKSTMRIIDCRETGSSKYPNCAYKTTQVEKHIIVACGGKPSVPVHFDASV</p>              |
|     | 1y92B<br>(124) |   |       |                                                                                                                                                                                                                                                                                                                                                                                                                                                                                                                                                                                                                                                                                                                                                                                                                                                                                                                                                                                                                                                                                                                                                                                                                                                                                                                                                                                             |
| 904 | 1a5pA<br>(124) | N | 80.65 | <p>TM-align: aliSize=104 (resi) RMSD=0.88 (Å)</p> <p>ketaaakferqhmd <b>ss</b>tsaa-----SSSNYCNQMMKSRNLTKDRAKPVNTFVHESLADVQAVCSQKNVACKNGOTNCYQSYSTMSITDCRETGSSKYPNAAYKTTQANKHIIVACEINIFYVPVHFDASV<br/> -----kesaaakferqhmdsgnsasSSSNYCNQMMCCRKMTQGGCKPVNTFVHESLADVQAVCSQKNVACKNGOTNCYQSKSTMRIIDCRETGSSKYPNCAYKTTQVEKHIIVACGGKPSVPVHFDASV</p> <p>SARST: aliSize=121 (resi) RMSD=9.56 (Å)</p> <p>k-ETAAAKFERQHMD<b>S</b>STAASSSNYCNQMMKSRNLTKDRAKPVNTFVHESLADVQAVCSQKNVACKNGOTNCYQSYSTMSITDCRETGSSKYPNAAYKTTQANKHIIVACEINIFYVPVHFDAS-v<br/> -kESAAAKFERQHMD<b>S</b>NSASSSNYCNQMMCCRKMTQGGCKPVNTFVHESLADVQAVCSQKNVACKNGOTNCYQSKSTMRIIDCRETGSSKYPNCAYKTTQVEKHIIVACGGKPSVPVHFDASv-</p> <p>BLAST: aliSize=107 (resi) iden=80.65% (100/124) simi=86.29% (107/124)</p> <p>KEETAAAKFERQHMD<b>S</b>STAASSSNYCNQMMKSRNLTKDRAKPVNTFVHESLADVQAVCSQKNVACKNGOTNCYQSYSTMSITDCRETGSSKYPNAAYKTTQANKHIIVACEINIFYVPVHFDASV<br/> KESAAAKFERQHMD<b>S</b>NSASSSNYCNQMMCCRKMTQGGCKPVNTFVHESLADVQAVCSQKNVACKNGOTNCYQSKSTMRIIDCRETGSSKYPNCAYKTTQVEKHIIVACGGKPSVPVHFDASV</p> <p>Proposed: aliSize=124 (resi) RMSD=0.89 (Å)</p> <p>KEETAAAKFERQHMD<b>S</b>STAASSSNYCNQMMKSRNLTKDRAKPVNTFVHESLADVQAVCSQKNVACKNGOTNCYQSYSTMSITDCRETGSSKYPNAAYKTTQANKHIIVACEINIFYVPVHFDASV<br/> KESAAAKFERQHMD<b>S</b>NSASSSNYCNQMMCCRKMTQGGCKPVNTFVHESLADVQAVCSQKNVACKNGOTNCYQSKSTMRIIDCRETGSSKYPNCAYKTTQVEKHIIVACGGKPSVPVHFDASV</p>        |
|     | 3bcoA<br>(124) |   |       |                                                                                                                                                                                                                                                                                                                                                                                                                                                                                                                                                                                                                                                                                                                                                                                                                                                                                                                                                                                                                                                                                                                                                                                                                                                                                                                                                                                             |
| 905 | 1a5pA<br>(124) | N | 82.26 | <p>TM-align: aliSize=104 (resi) RMSD=0.97 (Å)</p> <p>ketaaakferqhmd <b>ss</b>tsaa-----SSSNYCNQMMKSRNLTKDRAKPVNTFVHESLADVQAVCSQKNVACKNGOTNCYQSYSTMSITDCRETGSSKYPNAAYKTTQANKHIIVACEINIFYVPVHFDASV<br/> -----kesaaakferqhmd <b>ss</b>tsaaSSSNYCNLMCCRKMTQGGCKPVNTFVHESLADVQAVCSQKNVACKNGOTNCYQSKSTMRIIDCRETGSSKYPNCAYKTTQVEKHIIVACGGKPSVPVHFDASV</p> <p>SARST: aliSize=121 (resi) RMSD=9.56 (Å)</p> <p>k-ETAAAKFERQHMD<b>S</b>STAASSSNYCNQMMKSRNLTKDRAKPVNTFVHESLADVQAVCSQKNVACKNGOTNCYQSYSTMSITDCRETGSSKYPNAAYKTTQANKHIIVACEINIFYVPVHFDAS-v<br/> -kESAAAKFERQHMD<b>S</b>STAASSSNYCNLMCCRKMTQGGCKPVNTFVHESLADVQAVCSQKNVACKNGOTNCYQSKSTMRIIDCRETGSSKYPNCAYKTTQVEKHIIVACGGKPSVPVHFDASv-</p> <p>BLAST: aliSize=108 (resi) iden=82.26% (102/124) simi=87.10% (108/124)</p> <p>KEETAAAKFERQHMD<b>S</b>STAASSSNYCNQMMKSRNLTKDRAKPVNTFVHESLADVQAVCSQKNVACKNGOTNCYQSYSTMSITDCRETGSSKYPNAAYKTTQANKHIIVACEINIFYVPVHFDASV<br/> KESAAAKFERQHMD<b>S</b>STAASSSNYCNLMCCRKMTQGGCKPVNTFVHESLADVQAVCSQKNVACKNGOTNCYQSKSTMRIIDCRETGSSKYPNCAYKTTQVEKHIIVACGGKPSVPVHFDASV</p> <p>Proposed: aliSize=124 (resi) RMSD=0.97 (Å)</p> <p>KEETAAAKFERQHMD<b>S</b>STAASSSNYCNQMMKSRNLTKDRAKPVNTFVHESLADVQAVCSQKNVACKNGOTNCYQSYSTMSITDCRETGSSKYPNAAYKTTQANKHIIVACEINIFYVPVHFDASV<br/> KESAAAKFERQHMD<b>S</b>STAASSSNYCNLMCCRKMTQGGCKPVNTFVHESLADVQAVCSQKNVACKNGOTNCYQSKSTMRIIDCRETGSSKYPNCAYKTTQVEKHIIVACGGKPSVPVHFDASV</p> |
|     | 1y94A<br>(124) |   |       |                                                                                                                                                                                                                                                                                                                                                                                                                                                                                                                                                                                                                                                                                                                                                                                                                                                                                                                                                                                                                                                                                                                                                                                                                                                                                                                                                                                             |

|     |                                                     |   |       |                                                                                                                                                                                                                                                                                                                                                                                                                                                                                                                                                                                                                                                                                                                                                                                                                                                                                                                                                                                                                                                                                                                                                                                                                                                                                                                                                                    |
|-----|-----------------------------------------------------|---|-------|--------------------------------------------------------------------------------------------------------------------------------------------------------------------------------------------------------------------------------------------------------------------------------------------------------------------------------------------------------------------------------------------------------------------------------------------------------------------------------------------------------------------------------------------------------------------------------------------------------------------------------------------------------------------------------------------------------------------------------------------------------------------------------------------------------------------------------------------------------------------------------------------------------------------------------------------------------------------------------------------------------------------------------------------------------------------------------------------------------------------------------------------------------------------------------------------------------------------------------------------------------------------------------------------------------------------------------------------------------------------|
| 906 | <p>1z5fA<br/>(105)</p> <hr/> <p>1lbgA<br/>(124)</p> | N | 21.90 | <p><b>TM-align:</b> aliSize=85 (resi) RMSD=3.09 (Å)<br/> dwetfqkhhlttdtk-----K-VKCDVEIAKALFD--CK-KTNTFIYALPGRVKALCKNIrd-----NTDVL SRDAFLLPQCDRIKLP---PCHYKLSSTNTICITV--NQLPIHFAGVgscp<br/> -----kesaaakferqhmdsgnspsSSsNYCNLMCCRKMTQgkCkPVNTHVHESLADVKAVCSQK--kvtckngqTNCYQSKSTMRIIDCRETGSSkypnAYKTTQVEKHIIVACGgkPSVPVHFDA SV---</p> <p><b>SARST:</b> aliSize=84 (resi) RMSD=11.40 (Å)<br/> d-----WETFQKKHLTDTKKVKCDVEIAKALFD--CK-KTNTFIYALPGRVKALCKNIrd-----TDVLSRDAFLLPQCDRIKLP---PCHYKLSSTNTICITV--NQLPIHFAGV----gscp<br/> -kesaaakFERQHMDSGNSPSS--SSNYcnlmmCCRKMTQgkCkPVNTHVHESLADVKAVCSQKVTCKngqtTNCYQSKSTMRIIDCRETGSSkypncayktqVEKHIIVACG-GKPSVPVHFdasv----</p> <p><b>BLAST:</b> aliSize=22 (resi) iden=14.42% (15/105) simi=21.15% (22/105)<br/> dwetfqkhhlttdtkvKCDVemakalfd-----CKKTNTFIYALPGRVKALCKNIrdndvlsrdaflpqpCDRIKLPCHYKLSSTNTICITV-----itcvnqlpihfagvgscp<br/> -----kesaaakferqhmdsgnspsSSsNYcnlmmccrkmTQgkCkPVNTHVHESLADVKAVCSQ--KKV-----KNGQTNCYQSKSTMRIIDCRETGSSkypncayktqvekhivacggkpsvpvhf dasv-----</p> <p><b>Proposed:</b> aliSize=96 (resi) RMSD=2.32 (Å)<br/> p--DWETFQKKHLTDTKKVKCDVEIAK-ALFD--CKKTNTFIYALPGRVKALCKNI-----rdnTDVLSRDAFLLPQCDRIKLP---PCHYKLSSTNTICITV--NQLPIHFAGVgscp<br/> -kesAAAKFERQHMDSGNSPSSsSNYCNLMCCRKMTQgkCkPVNTHVHESLADVKAVCS--Sqqkvtckngqt---NCYQSKSTMRIIDCRETGSSkypnAYKTTQVEKHIIVACGgkPSVPVHFDA SV---</p>    |
| 907 | <p>1z5fA<br/>(105)</p> <hr/> <p>1y92B<br/>(124)</p> | N | 20.95 | <p><b>TM-align:</b> aliSize=85 (resi) RMSD=2.88 (Å)<br/> dwetfqkhhlttdtk-----K-VKCDVEIAKALFD--CK-KTNTFIYALPGRVKALCKNIrd-----NTDVL SRDAFLLPQCDRIKLP---PCHYKLSSTNTICITV--NQLPIHFAGVgscp<br/> -----kesaaakferqhmdsgnsasSSsNYCNLMCCRKMTQgkCkPVNTHVHESLADVKAVCSQK--kvtckdgqTNCYQSKSTMRIIDCRETGSSkypnAYKTTQVEKHIIVACGgkPSVPVHFDA SV---</p> <p><b>SARST:</b> aliSize=82 (resi) RMSD=6.67 (Å)<br/> dwetfqkhhlttdtkvk-----CDVEMAKALFD--CKKTNTFIYALPGRVKALCKNIrdndvlsrdaflpqpCDRIKLP---PCHYKLSSTNTICITV--NQLPIHFAGV----gscp<br/> -----kesaaakferqhmdsgnsasSSsNYcnlmmCCRKMTQgkCkPVNTHVHESLADVKAVCSQKVTCKDGTNCYQsks tmRITDCRETGSSkypnAYKTTQVEKHIIVACG-GKPSVPVHFdasv----</p> <p><b>BLAST:</b> aliSize=24 (resi) iden=15.38% (16/105) simi=23.08% (24/105)<br/> dwetfqkhhlttdtkvkCDVemakalfd-----CKKTNTFIYALPGRVKALCKNIrdndvlsrdaflpqpCDRIKLPCHYKLSSTNTICITV-----itcvnqlpihfagvgscp<br/> -----kesaaakferqhmdsgnsasSSsNYcnlmmccrkmTQgkCkPVNTHVHESLADVKAVCSQK-----VTCKDG-----QTN-----CYQSKSTMRIIDCRETGSSkypncayktqvekhivacggkpsvpvhf dasv-----</p> <p><b>Proposed:</b> aliSize=96 (resi) RMSD=2.27 (Å)<br/> p--DWETFQKKHLTDTKKVKCDVEIAK-ALFD--CKKTNTFIYALPGRVKALCKNI-----rdnTDVLSRDAFLLPQCDRIKLP---PCHYKLSSTNTICITV--NQLPIHFAGVgscp<br/> kESAAAKFERQHMDSGNSasSSsSNYCNLMCCRKMTQgkCkPVNTHVHESLADVKAVCS--Sqqkvtckdgqt---NCYQSKSTMRIIDCRETGSSkypnAYKTTQVEKHIIVACGgkPSVPVHFDA SV---</p> |
| 908 | <p>1z5fA<br/>(105)</p> <hr/> <p>3bcoA<br/>(124)</p> | N | 20.00 | <p><b>TM-align:</b> aliSize=85 (resi) RMSD=3.04 (Å)<br/> dwetfqkhhlttdtk-----K-VKCDVEIAKALFD--CK-KTNTFIYALPGRVKALCKNIrd-----NTDVL SRDAFLLPQCDRIKLP---PCHYKLSSTNTICITV--NQLPIHFAGVgscp<br/> -----kesaaakferqhmdsgnsasSSsNYCNLMCCRKMTQgkCkPVNTHVHESLADVKAVCSQK--kvtckdgqTNCYQSKSTMRIIDCRETGSSkypnAYKTTQVEKHIIVACGgkPSVPVHFDA SV---</p> <p><b>SARST:</b> aliSize=82 (resi) RMSD=4.89 (Å)<br/> dwetfqkhhlttdtkvk-----CDVEMAKALFD--CKKTNTFIYALPGRVKALCKNIrdndvlsrdaflpqpCDRIKLP---PCHYKLSSTNTICITV--NQLPIHFAGV----gscp<br/> -----kesaaakferqhmdsgnsasSSsNYcnlmmCCRKMTQgkCkPVNTHVHESLADVKAVCSQKVTCKDGTNCYQsks tmRITDCRETGSSkypnAYKTTQVEKHIIVACG-GKPSVPVHFdasv----</p> <p><b>BLAST:</b> aliSize=24 (resi) iden=15.38% (16/105) simi=23.08% (24/105)<br/> dwetfqkhhlttdtkvkCDVemakalfd-----CKKTNTFIYALPGRVKALCKNIrdndvlsrdaflpqpCDRIKLPCHYKLSSTNTICITV-----itcvnqlpihfagvgscp<br/> -----kesaaakferqhmdsgnsasSSsNYcnlmmccrkmTQgkCkPVNTHVHESLADVKAVCSQK-----VTCKDG-----QTN-----CYQSKSTMRIIDCRETGSSkypncayktqvekhivacggkpsvpvhf dasv-----</p> <p><b>Proposed:</b> aliSize=97 (resi) RMSD=2.47 (Å)<br/> p--DWETFQKKHLTDTKKVKCDVEIAK-ALFD--CKKTNTFIYALPGRVKALCKNI-----rdnTDVLSRDAFLLPQCDRIKLP---PCHYKLSSTNTICITV--NQLPIHFAGVgscp<br/> kESAAAKFERQHMDSGNSasSSsSNYCNLMCCRKMTQgkCkPVNTHVHESLADVKAVCS--Sqqkvtckdgqt---NCYQSKSTMRIIDCRETGSSkypnAYKTTQVEKHIIVACGgkPSVPVHFDA SV---</p> |

|     |                |   |       |                                                                                                                                                                                                                                                                                                                                                                                                                                                                                                                                                                                                                                                                                                                                                                                                                                                                                                                                                                                                                                                                                                                                                                                                                                                                                                                                                          |
|-----|----------------|---|-------|----------------------------------------------------------------------------------------------------------------------------------------------------------------------------------------------------------------------------------------------------------------------------------------------------------------------------------------------------------------------------------------------------------------------------------------------------------------------------------------------------------------------------------------------------------------------------------------------------------------------------------------------------------------------------------------------------------------------------------------------------------------------------------------------------------------------------------------------------------------------------------------------------------------------------------------------------------------------------------------------------------------------------------------------------------------------------------------------------------------------------------------------------------------------------------------------------------------------------------------------------------------------------------------------------------------------------------------------------------|
| 909 | 2bw1A<br>(118) | N | 35.59 | <p><b>TM-align:</b> aliSize=96 (resi) RMSD=1.74 (Å)<br/> ddsrytkfl tqhhdakpk-----GRDDRYCERMMKRSLTS-PCKDNTFIHGKNSNIKAI CGANGSPYR-----ENLRMSKSPFOVITCKHTGGSPRPPQYRASAGFRHVVIACE-N-GLPVHFEsFF<br/> -----kesaaakferqhmdsgnspSSSSNYCNLMCCRKMTQgKCKPNTFVHESLADVKAVCS--QKKVTckngqTnCYOSKSTMRIIDCRETGSSKYPNCAKTTQVEKHIIVACGGkpSVPVHFDA-SV</p> <p><b>SARST:</b> aliSize=108 (resi) RMSD=9.84 (Å)<br/> dd--SRYTKFLTOHHDAKPKGRDD---RYCERMMKRSLTS-PCKDNTFIHGKNSNIKAI CGANGSPYR---NLRMSKSPFOVITCKHTGGSPRPPQYRASAGFRHVVIACE-N-GLPVHF----desf<br/> --keSAAAKFERQHMD--S-GNSPSSSSNYCNLMCCRKMTQgKCKPNTFVHESLADVKAVCSQKKVTCKNgqtCYOSKSTMRIIDCRETGSSKYPNCAKTTQVEKHIIVACGGkpSVPVHFdasv----</p> <p><b>BLAST:</b> aliSize=66 (resi) iden=37.61% (44/118) simi=56.41% (66/118)<br/> d-DSRYTKFLTOHHDA-KPKGRDDRYCERMMKRSLTS-PCKDNTFIHGKNSNIKAI CGANGSPYR---NLRMSKSPFOVITCKHTGGSPRPPQYRASAGFRHVVIACE--ENGLPVHFEs-f<br/> -kesAAAKFERQHMDsgnSPSSSSNYCNLMCCRKMTQgKCKPNTFVHESLADVKAVCSQKKVTCKNgqtCYOSKSTMRIIDCRETGSSKYPNCAKTTQVEKHIIVACGGkPSVPVHFDAsv-</p> <p><b>Proposed:</b> aliSize=113 (resi) RMSD=1.46 (Å)<br/> DDSRYTKFLTOHHDAK-PKG-rdRYCERMMKRSLTS-PCKDNTFIHGKNSNIKAI CGANGSPYR-----ENLRMSKSPFOVITCKHTGGSPRPPQYRASAGFRHVVIACE-N-GLPVHFEsFF<br/> KESAAAKFERQHMDsgnSPSSSSNYCNLMCCRKMTQgKCKPNTFVHESLADVKAVCS--QKKVTckngqTnCYOSKSTMRIIDCRETGSSKYPNCAKTTQVEKHIIVACGGkpSVPVHFDA-SV</p> |
| 910 | 2bw1A<br>(118) | N | 34.75 | <p><b>TM-align:</b> aliSize=96 (resi) RMSD=1.73 (Å)<br/> ddsrytkfl tqhhdakpk-----GfDDRYCERMMKRSLTS-PCKDNTFIHGKNSNIKAI CGANGSPYR---EN-LRMSKSPFOVITCKHTGGSPRPPQYRASAGFRHVVIACE-N-GLPVHFEsFF<br/> -----kesaaakferqhmdsgnsasS-SSNYCNLMCCRKMTQgKCKPNTFVHESLADVKAVCS--QKKVTckdgOTnCYOSKSTMRIIDCRETGSSKYPNCAKTTQVEKHIIVACGGkpSVPVHFDA-SV</p> <p><b>SARST:</b> aliSize=111 (resi) RMSD=9.65 (Å)<br/> dd--SRYTKFLTOHHDAKPKGRDDRYCERMMKRSLTS-PCKDNTFIHGKNSNIKAI CGANGSPY---RENLRMSKSPFOVITCKHTGGSPRPPQYRASAGFRHVVIACE-N-GLPVHF----desf<br/> --keSAAAKFERQHMDsgNSASSSSNYCNLMCCRKMTQgKCKPNTFVHESLADVKAVCSQKKVTCKdgOTnCYOSKSTMRIIDCRETGSSKYPNCAKTTQVEKHIIVACGGkpSVPVHFdasv----</p> <p><b>BLAST:</b> aliSize=65 (resi) iden=36.75% (43/118) simi=55.56% (65/118)<br/> d-DSRYTKFLTOHHDA-KPKGRDDRYCERMMKRSLTS-PCKDNTFIHGKNSNIKAI CGANGSPYR---NLRMSKSPFOVITCKHTGGSPRPPQYRASAGFRHVVIACE--ENGLPVHFEs-f<br/> -kesAAAKFERQHMDsgNSASSSSNYCNLMCCRKMTQgKCKPNTFVHESLADVKAVCSQKKVTCKDgqtCYOSKSTMRIIDCRETGSSKYPNCAKTTQVEKHIIVACGGkPSVPVHFDAsv-</p> <p><b>Proposed:</b> aliSize=114 (resi) RMSD=1.59 (Å)<br/> DDSRYTKFLTOHHDAKPKGRD-DRYCERMMKRSLTS-PCKDNTFIHGKNSNIKAI CGANGSPYR---ENLRMSKSPFOVITCKHTGGSPRPPQYRASAGFRHVVIACE-N-GLPVHFEsFF<br/> KESAAAKFERQHMDsgNSASSSSNYCNLMCCRKMTQgKCKPNTFVHESLADVKAVCS--QKKVTckdgqTnCYOSKSTMRIIDCRETGSSKYPNCAKTTQVEKHIIVACGGkpSVPVHFDA-SV</p>       |
| 911 | 2bw1A<br>(118) | N | 35.59 | <p><b>TM-align:</b> aliSize=96 (resi) RMSD=1.82 (Å)<br/> ddsrytkfl tqhhdakpk-----GRDDRYCERMMKRSLTS-PCKDNTFIHGKNSNIKAI CGANGSPYR-----ENLRMSKSPFOVITCKHTGGSPRPPQYRASAGFRHVVIACE-N-GLPVHFEsFF<br/> -----kesaaakferqhmdsgnsaSSSSNYCNLMCCRKMTQgKCKPNTFVHESLADVKAVCS--QKKVTckdgqTnCYOSKSTMRIIDCRETGSSKYPNCAKTTQVEKHIIVACGGkpSVPVHFDA-SV</p> <p><b>SARST:</b> aliSize=111 (resi) RMSD=9.75 (Å)<br/> dd--SRYTKFLTOHHDAKPKGRDDRYCERMMKRSLTS-PCKDNTFIHGKNSNIKAI CGANGSPY---RENLRMSKSPFOVITCKHTGGSPRPPQYRASAGFRHVVIACE-N-GLPVHF----desf<br/> --keSAAAKFERQHMDsgNSASSSSNYCNLMCCRKMTQgKCKPNTFVHESLADVKAVCSQKKVTCKdgOTnCYOSKSTMRIIDCRETGSSKYPNCAKTTQVEKHIIVACGGkpSVPVHFdasv----</p> <p><b>BLAST:</b> aliSize=66 (resi) iden=36.75% (43/118) simi=56.41% (66/118)<br/> d-DSRYTKFLTOHHDA-KPKGRDDRYCERMMKRSLTS-PCKDNTFIHGKNSNIKAI CGANGSPYR---NLRMSKSPFOVITCKHTGGSPRPPQYRASAGFRHVVIACE--ENGLPVHFEs-f<br/> -kesAAAKFERQHMDsgNSASSSSNYCNLMCCRKMTQgKCKPNTFVHESLADVKAVCSQKKVTCKDgqtCYOSKSTMRIIDCRETGSSKYPNCAKTTQVEKHIIVACGGkPSVPVHFDAsv-</p> <p><b>Proposed:</b> aliSize=113 (resi) RMSD=1.54 (Å)<br/> DDSRYTKFLTOHHDAK-PKG-rdRYCERMMKRSLTS-PCKDNTFIHGKNSNIKAI CGANGSPYR-----ENLRMSKSPFOVITCKHTGGSPRPPQYRASAGFRHVVIACE-N-GLPVHFEsFF<br/> KESAAAKFERQHMDsgNSASSSSNYCNLMCCRKMTQgKCKPNTFVHESLADVKAVCS--QKKVTckdgqTnCYOSKSTMRIIDCRETGSSKYPNCAKTTQVEKHIIVACGGkpSVPVHFDA-SV</p>     |
|     | 3bcoA<br>(124) |   |       |                                                                                                                                                                                                                                                                                                                                                                                                                                                                                                                                                                                                                                                                                                                                                                                                                                                                                                                                                                                                                                                                                                                                                                                                                                                                                                                                                          |



|     |                                               |   |       |                                                                                                                                                                                                                                                                                                                                                                                                                                                                                                                                                                                                                                                                                                                                                                                                                                                                                                                                                                                                                                                                                                                                                                                                                                                                                                                                                                               |
|-----|-----------------------------------------------|---|-------|-------------------------------------------------------------------------------------------------------------------------------------------------------------------------------------------------------------------------------------------------------------------------------------------------------------------------------------------------------------------------------------------------------------------------------------------------------------------------------------------------------------------------------------------------------------------------------------------------------------------------------------------------------------------------------------------------------------------------------------------------------------------------------------------------------------------------------------------------------------------------------------------------------------------------------------------------------------------------------------------------------------------------------------------------------------------------------------------------------------------------------------------------------------------------------------------------------------------------------------------------------------------------------------------------------------------------------------------------------------------------------|
| 912 | <p>2bw1A<br/>(118)</p> <p>1y94A<br/>(124)</p> | N | 33.90 | <p><b>TM-align:</b> aliSize=96 (resi) RMSD=1.90 (Å)<br/> ddsrytkfl tqhhdakpk-----GRDDRYCERMMKRSLIS-PCKDINTFIHGKNSNIKAI CGANGSPYR----EN-LRMSKSPFOVITTKHIT-GGSprPPCOYRASAGFRHVVIACEN--GLPVHFEsFF<br/> -----kesaaakferqhmdsstsaASSSNYCNLMCCRKMTQgKCKPNTFVHESLADVKAVCS--QKKVTckdgQTnCYQSKSTMRIIDRETGSSKYPNCAIKTTQVEKHIIVACGGkpSVPVHFDA-SV</p> <p><b>SARST:</b> aliSize=110 (resi) RMSD=9.59 (Å)<br/> dd--SRYTKFLTOHH--AKPKGRDDRYCERMMKRSLIS-PCKDINTFIHGKNSNIKAI CGANGSPYRE----NLRMSKSPFOVITTKHITGGSPRPPCOYRASAGFRHVVIACEN--GLPVHF----desf<br/> --keSAAAKFEROHMDSSTSAASSS-NYCNLMCCRKMTQgKCKPNTFVHESLADVKAVCSQKKVTCKDgqtNCYQSKSTMRIIDRETGSSKYPNCAIKTTQVEKHIIVACGGkpSVPVHFdasv----</p> <p><b>BLAST:</b> aliSize=65 (resi) iden=36.75% (43/118) simi=55.56% (65/118)<br/> d-DSRYTKFLTOHHAKPKGRDD-RYCERMMKRSLIS-PCKDINTFIHGKNSNIKAI CGANGSPYRE----NLRMSKSPFOVITTKHITGGSPRPPCOYRASAGFRHVVIAC--ENGLPVHFEDES-f<br/> --kesAAAKFEROHMDSSTSAASSS-NYCNLMCCRKMTQgKCKPNTFVHESLADVKAVCSQKKVTCKDgqtNCYQSKSTMRIIDRETGSSKYPNCAIKTTQVEKHIIVACggKPSVPVHFDA-SV-</p> <p><b>Proposed:</b> aliSize=112 (resi) RMSD=1.42 (Å)<br/> DDSRYTKFLTOHHAK-PKG--rdRYCERMMKRSLIS-PCKDINTFIHGKNSNIKAI CGANGSPYR----ENLRMSKSPFOVITTKHIT-GGSprPPCOYRASAGFRHVVIACEN--GLPVHFEsFF<br/> KESAAAKFEROHMDSSTSAASSS--SNYCNLMCCRKMTQgKCKPNTFVHESLADVKAVCS--QKKVTckdgqTnCYQSKSTMRIIDRETGSSKYPNCAIKTTQVEKHIIVACGGkpSVPVHFDA-SV</p> |
| 913 | <p>1gy7A<br/>(123)</p> <p>11bgA<br/>(124)</p> | N | 40.65 | <p><b>TM-align:</b> aliSize=102 (resi) RMSD=1.82 (Å)<br/> dnsrythfl tqhydakpq-----GRDDRYCESTIRRRGLIS-PCKDINTFIHGKRSIKAI CSOKNVACKNGQTCYI SKSSFOVITTKLHGSPWPPOYRATAGFRNVVACE-N-GLPVHLDQsIFr<br/> -----kesaaakferqhmdsgnspSSSNYCNLMCCRKMTQgKCKPNTFVHESLADVKAVCSQKKVTCKNGQTCYQSKSTMRIIDRETSSKYPNCAIKTTQVEKHIIVACGGkpSVPVHFDA-SV-</p> <p><b>SARST:</b> aliSize=112 (resi) RMSD=9.32 (Å)<br/> dns---RYTHFLTOHYDAKPOGR-DDRYCESTIRRRGLIS-PCKDINTFIHGKRSIKAI CSOKNVACKNGQTCYI SKSSFOVITTKLHGSPWPPOYRATAGFRNVVACEN--GLPVHL----dqsifr<br/> ---kesAAAKFEROHMDSGNspSSSNYCNLMCCRKMTQgKCKPNTFVHESLADVKAVCSQKKVTCKNGQTCYQSKSTMRIIDRETSSKYPNCAIKTTQVEKHIIVACGGkpSVPVHFdasv-----</p> <p><b>BLAST:</b> aliSize=73 (resi) iden=41.80% (51/123) simi=59.84% (73/123)<br/> dnsryth-----LTOHYDA--KPOGRDDRYCESTIRRRGLIS-PCKDINTFIHGKRSIKAI CSOKNVACKNGQTCYI SKSSFOVITTKLHGSPWPPOYRATAGFRNVVAC--ENGLPVHLDQsIFr<br/> -----kesaaakFEROHMDSGNspSSSNYCNLMCCRKMTQgKCKPNTFVHESLADVKAVCSQKKVTCKNGQTCYQSKSTMRIIDRETSSKYPNCAIKTTQVEKHIIVACggKPSVPVHFDA-SV--</p> <p><b>Proposed:</b> aliSize=117 (resi) RMSD=1.42 (Å)<br/> pdn--SRYTHFLTOHYDAKPOGR-DDRYCESTIRRRGLIS-PCKDINTFIHGKRSIKAI CSOKNVACKNGQTCYI SKSSFOVITTKLHGSPWPPOYRATAGFRNVVACE-N-GLPVHLDQsI-fr<br/> ---keSAAAKFEROHMDSGNspSSSNYCNLMCCRKMTQgKCKPNTFVHESLADVKAVCSQKKVTCKNGQTCYQSKSTMRIIDRETSSKYPNCAIKTTQVEKHIIVACGGkpSVPVHFDA-Sv--</p>                |
| 914 | <p>1gy7A<br/>(123)</p> <p>1y92B<br/>(124)</p> | N | 39.02 | <p><b>TM-align:</b> aliSize=102 (resi) RMSD=1.89 (Å)<br/> dnsrythfl tqhydakpq-----GRDDRYCESTIRRRGLIS-PCKDINTFIHGKRSIKAI CSOKNVACKNGQTCYI SKSSFOVITTKLHGSPWPPOYRATAGFRNVVACEN--GLPVHLDQsIFr<br/> -----kesaaakferqhmdsgnsASSSNYCNLMCCRKMTQgKCKPNTFVHESLADVKAVCSQKKVTCKDGQTCYQSKSTMRIIDRETSSKYPNCAIKTTQVEKHIIVACGGkpSVPVHFDA-SV-</p> <p><b>SARST:</b> aliSize=113 (resi) RMSD=9.17 (Å)<br/> dns---RYTHFLTOHYDAKPOGRDDRYCESTIRRRGLIS-PCKDINTFIHGKRSIKAI CSOKNVACKNGQTCYI SKSSFOVITTKLHGSPWPPOYRATAGFRNVVACEN--GLPVHL----dqsifr<br/> ---kesAAAKFEROHMDSNSASSSNYCNLMCCRKMTQgKCKPNTFVHESLADVKAVCSQKKVTCKDGQTCYQSKSTMRIIDRETSSKYPNCAIKTTQVEKHIIVACGGkpSVPVHFdasv-----</p> <p><b>BLAST:</b> aliSize=71 (resi) iden=40.16% (49/123) simi=58.20% (71/123)<br/> dnsryth-----LTOHYDA--KPOGRDDRYCESTIRRRGLIS-PCKDINTFIHGKRSIKAI CSOKNVACKNGQTCYI SKSSFOVITTKLHGSPWPPOYRATAGFRNVVAC--ENGLPVHLDQsIFr<br/> -----kesaaakFEROHMDSNSASSSNYCNLMCCRKMTQgKCKPNTFVHESLADVKAVCSQKKVTCKDGQTCYQSKSTMRIIDRETSSKYPNCAIKTTQVEKHIIVACggKPSVPVHFDA-SV--</p> <p><b>Proposed:</b> aliSize=115 (resi) RMSD=1.28 (Å)<br/> pdn--SRYTHFLTOHYDAKPOGR--dRYCESTIRRRGLIS-PCKDINTFIHGKRSIKAI CSOKNVACKNGQTCYI SKSSFOVITTKLHG--GSprPPCOYRATAGFRNVVACEN--GLPVHLDQsI-fr<br/> ---keSAAAKFEROHMDSNSASSSNYCNLMCCRKMTQgKCKPNTFVHESLADVKAVCSQKKVTCKDGQTCYQSKSTMRIIDRETSSKYPNCAIKTTQVEKHIIVACGGkpSVPVHFDA-Sv--</p>                |

|     |                                                     |   |       |                                                                                                                                                                                                                                                                                                                                                                                                                                                                                                                                                                                                                                                                                                                                                                                                                                                                                                                                                                                                                                                                                                                                                                                                                                                                                                                                                                                                                                        |
|-----|-----------------------------------------------------|---|-------|----------------------------------------------------------------------------------------------------------------------------------------------------------------------------------------------------------------------------------------------------------------------------------------------------------------------------------------------------------------------------------------------------------------------------------------------------------------------------------------------------------------------------------------------------------------------------------------------------------------------------------------------------------------------------------------------------------------------------------------------------------------------------------------------------------------------------------------------------------------------------------------------------------------------------------------------------------------------------------------------------------------------------------------------------------------------------------------------------------------------------------------------------------------------------------------------------------------------------------------------------------------------------------------------------------------------------------------------------------------------------------------------------------------------------------------|
| 915 | <p>1gv7A<br/>(123)</p> <hr/> <p>3bcoA<br/>(124)</p> | N | 39.84 | <p><b>TM-align:</b> aliSize=102 (resi) RMSD=1.88 (Å)<br/>       dnsrythfl tqhyda kpg-----GRDDRYCESIMRRRGLTS-PCKDINTFIHGKRSIKAI CSOKNVACKNGOTNCY I SKSSFQVTT KLHGGSPWPPQYRAIAGFRNVVACE-N-GLPVHLDQsIFr<br/>       -----kesaaakferqhmdsgnsaSSSSNYCNQMMCCRKMTQgKCKPVNTEVHESLADVKAVCSOKKVTCKDGTNCYQSKSTMRIIDRETSSSKYPNCAKTTQVEKHIIVACGGkpsVPVHFDA-SV-</p> <p><b>SARST:</b> aliSize=113 (resi) RMSD=9.26 (Å)<br/>       dns---RYTHLTOHYDAKPOGRDDR- YCESIMRRRGLTS-PCKDINTFIHGKRSIKAI CSOKNVACKNGOTNCY I SKSSFQVTT KLHGGSPWPPQYRAIAGFRNVVACEN--GLPVHL----dqsifr<br/>       ---kesAAAKFEROHMSSGNSASSSSNYCNQMMCCRKMTQgKCKPVNTEVHESLADVKAVCSOKKVTCKDGTNCYQSKSTMRIIDRETSSSKYPNCAKTTQVEKHIIVACGGkpsVPVHFdasv-----</p> <p><b>BLAST:</b> aliSize=71 (resi) iden=40.16% (49/123) simi=58.20% (71/123)<br/>       dnsryth-----LTOHYDAKPOGRDDRYCESIMRRRGLTS-PCKDINTFIHGKRSIKAI CSOKNVACKNGOTNCY I SKSSFQVTT KLHGGSPWPPQYRAIAGFRNVVAC--ENGLPVHLDQsIFr<br/>       -----kesaaakFEROHMSSGNSASSSSNYCNQMMCCRKMTQgKCKPVNTEVHESLADVKAVCSOKKVTCKDGTNCYQSKSTMRIIDRETSSSKYPNCAKTTQVEKHIIVACGGkpsVPVHFDA-SV--</p> <p><b>Proposed:</b> aliSize=115 (resi) RMSD=1.36 (Å)<br/>       pdn--RYTHLTOHYDAK--POG-rdDRYCESIMRRRGLTS-PCKDINTFIHGKRSIKAI CSOKNVACKNGOTNCY I SKSSFQVTT KLHGGSPWPPQYRAIAGFRNVVACEN--GLPVHLDQsI-f r<br/>       ---kesAAAKFEROHMSSGNSASSSSNYCNQMMCCRKMTQgKCKPVNTEVHESLADVKAVCSOKKVTCKDGTNCYQSKSTMRIIDRETSSSKYPNCAKTTQVEKHIIVACGGkpsVPVHFDA-Sv--</p> |
| 916 | <p>1gv7A<br/>(123)</p> <hr/> <p>1y94A<br/>(124)</p> | N | 39.84 | <p><b>TM-align:</b> aliSize=102 (resi) RMSD=1.92 (Å)<br/>       dnsrythfl tqhyda kpg-----GRDDRYCESIMRRRGLTS-PCKDINTFIHGKRSIKAI CSOKNVACKNGOTNCY I SKSSFQVTT KLHGGSPWPPQYRAIAGFRNVVACE-N-GLPVHLDQsIFr<br/>       -----kesaaakferqhmdsstsaASSSNYCNLMMCCRKMTQgKCKPVNTEVHESLADVKAVCSOKKVTCKDGTNCYQSKSTMRIIDRETSSSKYPNCAKTTQVEKHIIVACGGkpsVPVHFDA-SV-</p> <p><b>SARST:</b> aliSize=113 (resi) RMSD=9.17 (Å)<br/>       dns---RYTHLTOHYDAKPOGRDDR- YCESIMRRRGLTSPCKDINTFIHGKRSIKAI CSOKNVACKNGOTNCY I SKSSFQVTT KLHGGSPWPPQYRAIAGFRNVVACEN--GLPVHL----dqsifr<br/>       ---kesAAAKFEROHMSSSTAASSSNYCNLMMCCRKMTQgKCKPVNTEVHESLADVKAVCSOKKVTCKDGTNCYQSKSTMRIIDRETSSSKYPNCAKTTQVEKHIIVACGGkpsVPVHFdasv-----</p> <p><b>BLAST:</b> aliSize=71 (resi) iden=40.16% (49/123) simi=58.20% (71/123)<br/>       dnsryth-----LTOHYDAKPOGRDDRYCESIMRRRGLTS-PCKDINTFIHGKRSIKAI CSOKNVACKNGOTNCY I SKSSFQVTT KLHGGSPWPPQYRAIAGFRNVVAC--ENGLPVHLDQsIFr<br/>       -----kesaaakFEROHMSSSTAASSSNYCNLMMCCRKMTQgKCKPVNTEVHESLADVKAVCSOKKVTCKDGTNCYQSKSTMRIIDRETSSSKYPNCAKTTQVEKHIIVACGGkpsVPVHFDA-SV--</p> <p><b>Proposed:</b> aliSize=115 (resi) RMSD=1.36 (Å)<br/>       pdn--RYTHLTOHYDAK--POG-rdDRYCESIMRRRGLTS-PCKDINTFIHGKRSIKAI CSOKNVACKNGOTNCY I SKSSFQVTT KLHGGSPWPPQYRAIAGFRNVVACEN--GLPVHLDQsI-f r<br/>       ---kesAAAKFEROHMSSSTAASSSNYCNLMMCCRKMTQgKCKPVNTEVHESLADVKAVCSOKKVTCKDGTNCYQSKSTMRIIDRETSSSKYPNCAKTTQVEKHIIVACGGkpsVPVHFDA-Sv--</p>     |
| 917 | <p>1rraA<br/>(124)</p> <hr/> <p>1lbgA<br/>(124)</p> | N | 66.13 | <p><b>TM-align:</b> aliSize=104 (resi) RMSD=1.03 (Å)<br/>       aessadkfrqhmdtegpsk-----SSPTYCNQMMKROGHTKGSCKPVNTEVHESLADVKAVCSQGOVTCCKNGRNNCHKSSSTLRIIDCR LKSSSKYPNCDYTTTDSQKHIIVACDGNFYVPVHFDA-SV<br/>       -----kesaaakferqhmdsgnpsSSSNYCNLMMCCRKMTQgKCKPVNTEVHESLADVKAVCSQKVTCKNGOTNCYQSKSTMRIIDCRETSSSKYPNCAKTTQVEKHIIVACGGKPSVPVHFDA-SV</p> <p><b>SARST:</b> aliSize=121 (resi) RMSD=9.62 (Å)<br/>       ae--SSADKFKROHMDTEGPSKSSPTYCNQMMKROGHTKGSCKPVNTEVHESLADVKAVCSQGOVTCCKNGRNNCHKSSSTLRIIDCR LKSSSKYPNCDYTTTDSQKHIIVACDGNFYVPVHFDA-SV<br/>       --kesAAAKFEROHMSSGNSPSSSNYCNLMMCCRKMTQgKCKPVNTEVHESLADVKAVCSQKVTCKNGOTNCYQSKSTMRIIDCRETSSSKYPNCAKTTQVEKHIIVACGGKPSVPVHFDA-SV</p> <p><b>BLAST:</b> aliSize=96 (resi) iden=66.13% (82/124) simi=77.42% (96/124)<br/>       a--SSADKFKROHMDTEGPSKSSPTYCNQMMKROGHTKGSCKPVNTEVHESLADVKAVCSQGOVTCCKNGRNNCHKSSSTLRIIDCR LKSSSKYPNCDYTTTDSQKHIIVACDGNFYVPVHFDA-SV<br/>       -kesAAAKFEROHMSSGNSPSSSNYCNLMMCCRKMTQgKCKPVNTEVHESLADVKAVCSQKVTCKNGOTNCYQSKSTMRIIDCRETSSSKYPNCAKTTQVEKHIIVACGGKPSVPVHFDA-SV</p> <p><b>Proposed:</b> aliSize=124 (resi) RMSD=1.18 (Å)<br/>       AESSADKFKROHMDTEGPSKSSPTYCNQMMKROGHTKGSCKPVNTEVHESLADVKAVCSQGOVTCCKNGRNNCHKSSSTLRIIDCR LKSSSKYPNCDYTTTDSQKHIIVACDGNFYVPVHFDA-SV<br/>       KESAAAKFEROHMSSGNSPSSSNYCNLMMCCRKMTQgKCKPVNTEVHESLADVKAVCSQKVTCKNGOTNCYQSKSTMRIIDCRETSSSKYPNCAKTTQVEKHIIVACGGKPSVPVHFDA-SV</p>                            |

|     |                                             |   |       |                                                                                                                                                                                                                                                                                                                                                                                                                                                                                                                                                                                                                                                                                                                                                                                                                                                                                                                                                                                                                                                                                                                                                                                                                                                                                                                                                                                      |
|-----|---------------------------------------------|---|-------|--------------------------------------------------------------------------------------------------------------------------------------------------------------------------------------------------------------------------------------------------------------------------------------------------------------------------------------------------------------------------------------------------------------------------------------------------------------------------------------------------------------------------------------------------------------------------------------------------------------------------------------------------------------------------------------------------------------------------------------------------------------------------------------------------------------------------------------------------------------------------------------------------------------------------------------------------------------------------------------------------------------------------------------------------------------------------------------------------------------------------------------------------------------------------------------------------------------------------------------------------------------------------------------------------------------------------------------------------------------------------------------|
| 918 | <p>IrraA (124)</p> <hr/> <p>1y92B (124)</p> | N | 65.32 | <p><b>TM-align:</b> aliSize=104 (resi)      RMSD=0.82 (Å)<br/> aessadkfrqhmdtegpsk-----SSPTTCNQMMKROGHTKGSCKPVNTFVHEPLEDVQAI CSQGQVTCNGRNCHKSSSTLRITDCRLKGSSKYPNCDYTTTDSQKHI I IACDGNFYVPVHFDASV<br/> -----kesaakferqhmdsgnsasSSSNYCNLMCCRKITQCKKCPVNTFVHESLADVKAVCSQKVTCKDQOTNCYQSKSTMRI TDCRETGSSKYPNCAKTTQVEKHI IVACGGKPSVPVHFDASV</p> <p><b>SARST:</b> aliSize=122 (resi)      RMSD=9.61 (Å)<br/> a-ESSADKFKROHMDTEGPSKSSPTTCNQMMKROGHTKGSCKPVNTFVHEPLEDVQAI CSQGQVTCNGRNCHKSSSTLRITDCRLKGSSKYPNCDYTTTDSQKHI I IACDGNFYVPVHFDAS -v<br/> -kESA AKFEROHMDSGNSASSSSNYCNLMCCRKITQCKKCPVNTFVHESLADVKAVCSQKVTCKDQOTNCYQSKSTMRI TDCRETGSSKYPNCAKTTQVEKHI IVACGGKPSVPVHFDASv-</p> <p><b>BLAST:</b> aliSize=97 (resi)      iden=65.32% (81/124)      simi=78.23% (97/124)<br/> a-ESSADKFKROHMDTEGPSKSSPTTCNQMMKROGHTKGSCKPVNTFVHEPLEDVQAI CSQGQVTCNGRNCHKSSSTLRITDCRLKGSSKYPNCDYTTTDSQKHI I IACDGNFYVPVHFDASV<br/> -kESA AKFEROHMDSGNSASSSSNYCNLMCCRKITQCKKCPVNTFVHESLADVKAVCSQKVTCKDQOTNCYQSKSTMRI TDCRETGSSKYPNCAKTTQVEKHI IVACGGKPSVPVHFDASV</p> <p><b>Proposed:</b> aliSize=124 (resi)      RMSD=0.76 (Å)<br/> AESSADKFKROHMDTEGPSKSSPTTCNQMMKROGHTKGSCKPVNTFVHEPLEDVQAI CSQGQVTCNGRNCHKSSSTLRITDCRLKGSSKYPNCDYTTTDSQKHI I IACDGNFYVPVHFDASV<br/> KESA AKFEROHMDSGNSASSSSNYCNLMCCRKITQCKKCPVNTFVHESLADVKAVCSQKVTCKDQOTNCYQSKSTMRI TDCRETGSSKYPNCAKTTQVEKHI IVACGGKPSVPVHFDASV</p>     |
| 919 | <p>IrraA (124)</p> <hr/> <p>3bcoA (124)</p> | N | 66.13 | <p><b>TM-align:</b> aliSize=104 (resi)      RMSD=1.06 (Å)<br/> aessadkfrqhmdtegpsk-----SSPTTCNQMMKROGHTKGSCKPVNTFVHEPLEDVQAI CSQGQVTCNGRNCHKSSSTLRITDCRLKGSSKYPNCDYTTTDSQKHI I IACDGNFYVPVHFDASV<br/> -----kesaakferqhmdsgnsasSSSNYCNLMCCRKITQCKKCPVNTFVHESLADVKAVCSQKVTCKDQOTNCYQSKSTMRI TDCRETGSSKYPNCAKTTQVEKHI IVACGGKPSVPVHFDASV</p> <p><b>SARST:</b> aliSize=120 (resi)      RMSD=9.38 (Å)<br/> a-ESSADKFKROHMDteGPSK--SSPTTCNQMMKROGHTKGSCKPVNTFVHEPLEDVQAI CSQGQVTCNGRNCHKSSSTLRITDCRLKGSSKYPNCDYTTTDSQKHI I IACDGNFYVPVHFDAS -v<br/> -kESA AKFEROHMD--SGNSASSSSNYCNLMCCRKITQCKKCPVNTFVHESLADVKAVCSQKVTCKDQOTNCYQSKSTMRI TDCRETGSSKYPNCAKTTQVEKHI IVACGGKPSVPVHFDASv-</p> <p><b>BLAST:</b> aliSize=98 (resi)      iden=66.13% (82/124)      simi=79.03% (98/124)<br/> a-ESSADKFKROHMDTEGPSKSSPTTCNQMMKROGHTKGSCKPVNTFVHEPLEDVQAI CSQGQVTCNGRNCHKSSSTLRITDCRLKGSSKYPNCDYTTTDSQKHI I IACDGNFYVPVHFDASV<br/> -kESA AKFEROHMDSGNSASSSSNYCNLMCCRKITQCKKCPVNTFVHESLADVKAVCSQKVTCKDQOTNCYQSKSTMRI TDCRETGSSKYPNCAKTTQVEKHI IVACGGKPSVPVHFDASV</p> <p><b>Proposed:</b> aliSize=124 (resi)      RMSD=1.13 (Å)<br/> AESSADKFKROHMDTEGPSKSSPTTCNQMMKROGHTKGSCKPVNTFVHEPLEDVQAI CSQGQVTCNGRNCHKSSSTLRITDCRLKGSSKYPNCDYTTTDSQKHI I IACDGNFYVPVHFDASV<br/> KESA AKFEROHMDSGNSASSSSNYCNLMCCRKITQCKKCPVNTFVHESLADVKAVCSQKVTCKDQOTNCYQSKSTMRI TDCRETGSSKYPNCAKTTQVEKHI IVACGGKPSVPVHFDASV</p> |
| 920 | <p>IrraA (124)</p> <hr/> <p>1y94A (124)</p> | N | 65.32 | <p><b>TM-align:</b> aliSize=104 (resi)      RMSD=1.05 (Å)<br/> aessadkfrqhmdtegpsk-----SSPTTCNQMMKROGHTKGSCKPVNTFVHEPLEDVQAI CSQGQVTCNGRNCHKSSSTLRITDCRLKGSSKYPNCDYTTTDSQKHI I IACDGNFYVPVHFDASV<br/> -----kesaakferqhmdsstsaasSNYCNLMCCRKITQCKKCPVNTFVHESLADVKAVCSQKVTCKDQOTNCYQSKSTMRI TDCRETGSSKYPNCAKTTQVEKHI IVACGGKPSVPVHFDASV</p> <p><b>SARST:</b> aliSize=122 (resi)      RMSD=9.60 (Å)<br/> a-ESSADKFKROHMDTEGPSKSSPTTCNQMMKROGHTKGSCKPVNTFVHEPLEDVQAI CSQGQVTCNGRNCHKSSSTLRITDCRLKGSSKYPNCDYTTTDSQKHI I IACDGNFYVPVHFDAS -v<br/> -kESA AKFEROHMDSSTSAASSSNYCNLMCCRKITQCKKCPVNTFVHESLADVKAVCSQKVTCKDQOTNCYQSKSTMRI TDCRETGSSKYPNCAKTTQVEKHI IVACGGKPSVPVHFDASv-</p> <p><b>BLAST:</b> aliSize=97 (resi)      iden=65.32% (81/124)      simi=78.23% (97/124)<br/> a-ESSADKFKROHMDTEGPSKSSPTTCNQMMKROGHTKGSCKPVNTFVHEPLEDVQAI CSQGQVTCNGRNCHKSSSTLRITDCRLKGSSKYPNCDYTTTDSQKHI I IACDGNFYVPVHFDASV<br/> -kESA AKFEROHMDSSTSAASSSNYCNLMCCRKITQCKKCPVNTFVHESLADVKAVCSQKVTCKDQOTNCYQSKSTMRI TDCRETGSSKYPNCAKTTQVEKHI IVACGGKPSVPVHFDASV</p> <p><b>Proposed:</b> aliSize=124 (resi)      RMSD=1.16 (Å)<br/> AESSADKFKROHMDTEGPSKSSPTTCNQMMKROGHTKGSCKPVNTFVHEPLEDVQAI CSQGQVTCNGRNCHKSSSTLRITDCRLKGSSKYPNCDYTTTDSQKHI I IACDGNFYVPVHFDASV<br/> KESA AKFEROHMDSSTSAASSSNYCNLMCCRKITQCKKCPVNTFVHESLADVKAVCSQKVTCKDQOTNCYQSKSTMRI TDCRETGSSKYPNCAKTTQVEKHI IVACGGKPSVPVHFDASV</p>      |

|     |                                                     |   |       |                                                                                                                                                                                                                                                                                                                                                                                                                                                                                                                                                                                                                                                                                                                                                                                                                                                                                                                                                                                                                                                                                                                                                                                                                                                                                                                                                                                            |
|-----|-----------------------------------------------------|---|-------|--------------------------------------------------------------------------------------------------------------------------------------------------------------------------------------------------------------------------------------------------------------------------------------------------------------------------------------------------------------------------------------------------------------------------------------------------------------------------------------------------------------------------------------------------------------------------------------------------------------------------------------------------------------------------------------------------------------------------------------------------------------------------------------------------------------------------------------------------------------------------------------------------------------------------------------------------------------------------------------------------------------------------------------------------------------------------------------------------------------------------------------------------------------------------------------------------------------------------------------------------------------------------------------------------------------------------------------------------------------------------------------------|
| 921 | <p>2q4gX<br/>(126)</p> <hr/> <p>1lbgA<br/>(124)</p> | N | 69.35 | <p><b>TM-align:</b> aliSize=104 (resi) RMSD=0.92 (Å)<br/> esrakkfqrqhmdsdsps-----SSSTYCNQMMRRRNMTQGRCKPVNTFVHEPLVDVQNVCFJEKVTCKNGGNCYKSNSSMHI TDCRLNGSRYPNCAYRTSPKERHI IVACEISFYVPVHFDASVeds<br/> -----kesaaakferqhmdsgnspsSSSNYCNLMCCRKMTQGRCKPVNTFVHESLADVKAVCSOKKVTCCKGDTNICYOSKSTMRI TDCREIGSSKYPNCAYKTTQVEKHI IVACGGKPSVPVHFDASV----</p> <p><b>SARST:</b> aliSize=121 (resi) RMSD=9.64 (Å)<br/> e--SRKKFQROHMDSDSSPSSSTYCNQMMRRRNMTQGRCKPVNTFVHEPLVDVQNVCFJEKVTCKNGGNCYKSNSSMHI TDCRLNGSRYPNCAYRTSPKERHI IVACEISFYVPVHFDASV-veds<br/> -keSAAKFEROHMDSGNSPSSSNYCNLMCCRKMTQGRCKPVNTFVHESLADVKAVCSOKKVTCCKGDTNICYOSKSTMRI TDCREIGSSKYPNCAYKTTQVEKHI IVACGGKPSVPVHFDASVv----</p> <p><b>BLAST:</b> aliSize=100 (resi) iden=71.77% (89/124) simi=80.65% (100/124)<br/> -ESRAKKFQROHMDSDSSPSSSTYCNQMMRRRNMTQGRCKPVNTFVHEPLVDVQNVCFJEKVTCKNGGNCYKSNSSMHI TDCRLNGSRYPNCAYRTSPKERHI IVACEISFYVPVHFDASVeds<br/> kESAAAKFEROHMDSGNSPSSSNYCNLMCCRKMTQGRCKPVNTFVHESLADVKAVCSOKKVTCCKGDTNICYOSKSTMRI TDCREIGSSKYPNCAYKTTQVEKHI IVACGGKPSVPVHFDASV----</p> <p><b>Proposed:</b> aliSize=122 (resi) RMSD=0.85 (Å)<br/> -ESRAKKFQROHMDSDSSPSS-SSTYCNQMMRRRNMTQGRCKPVNTFVHEPLVDVQNVCFJEKVTCKNGGNCYKSNSSMHI TDCRLNGSRYPNCAYRTSPKERHI IVACEISFYVPVHFDASVeds<br/> kESAAAKFEROHMDSGNSPSSSNYCNLMCCRKMTQGRCKPVNTFVHESLADVKAVCSOKKVTCCKGDTNICYOSKSTMRI TDCREIGSSKYPNCAYKTTQVEKHI IVACGGKPSVPVHFDASV----</p>      |
| 922 | <p>2q4gX<br/>(126)</p> <hr/> <p>1y92B<br/>(124)</p> | N | 70.16 | <p><b>TM-align:</b> aliSize=104 (resi) RMSD=0.89 (Å)<br/> esrakkfqrqhmdsdsps-----SSSTYCNQMMRRRNMTQGRCKPVNTFVHEPLVDVQNVCFJEKVTCKNGGNCYKSNSSMHI TDCRLNGSRYPNCAYRTSPKERHI IVACEISFYVPVHFDASVeds<br/> -----kesaaakferqhmdsgnsasSSSNYCNLMCCRKMTQGRCKPVNTFVHESLADVKAVCSOKKVTCCKDGTNICYOSKSTMRI TDCREIGSSKYPNCAYKTTQVEKHI IVACGGKPSVPVHFDASV----</p> <p><b>SARST:</b> aliSize=118 (resi) RMSD=8.22 (Å)<br/> esra----KQROHMDSDSPSSSTYCNQMMRRRNMTQGRCKPVNTFVHEPLVDVQNVCFJEKVTCKNGGNCYKSNSSMHI TDCRLNGSRYPNCAYRTSPKERHI IVACEISFYVPVHFDASV-veds<br/> ----kesaaakferqhmdsgnsasSSSNYCNLMCCRKMTQGRCKPVNTFVHESLADVKAVCSOKKVTCCKDGTNICYOSKSTMRI TDCREIGSSKYPNCAYKTTQVEKHI IVACGGKPSVPVHFDASVv----</p> <p><b>BLAST:</b> aliSize=99 (resi) iden=70.16% (87/124) simi=79.84% (99/124)<br/> -ESRAKKFQROHMDSDSPSSSTYCNQMMRRRNMTQGRCKPVNTFVHEPLVDVQNVCFJEKVTCKNGGNCYKSNSSMHI TDCRLNGSRYPNCAYRTSPKERHI IVACEISFYVPVHFDASVeds<br/> kESAAAKFEROHMDSGNSASSSSNYCNLMCCRKMTQGRCKPVNTFVHESLADVKAVCSOKKVTCCKDGTNICYOSKSTMRI TDCREIGSSKYPNCAYKTTQVEKHI IVACGGKPSVPVHFDASV----</p> <p><b>Proposed:</b> aliSize=123 (resi) RMSD=0.75 (Å)<br/> -ESRAKKFQROHMDSDSPSSSTYCNQMMRRRNMTQGRCKPVNTFVHEPLVDVQNVCFJEKVTCKNGGNCYKSNSSMHI TDCRLNGSRYPNCAYRTSPKERHI IVACEISFYVPVHFDASVeds<br/> kESAAAKFEROHMDSGNSASSSSNYCNLMCCRKMTQGRCKPVNTFVHESLADVKAVCSOKKVTCCKDGTNICYOSKSTMRI TDCREIGSSKYPNCAYKTTQVEKHI IVACGGKPSVPVHFDASV----</p>     |
| 923 | <p>2q4gX<br/>(126)</p> <hr/> <p>3bcoA<br/>(124)</p> | N | 70.97 | <p><b>TM-align:</b> aliSize=104 (resi) RMSD=0.95 (Å)<br/> esrakkfqrqhmdsdsps-----SSSTYCNQMMRRRNMTQGRCKPVNTFVHEPLVDVQNVCFJEKVTCKNGGNCYKSNSSMHI TDCRLNGSRYPNCAYRTSPKERHI IVACEISFYVPVHFDASVeds<br/> -----kesaaakferqhmdsgnsasSSSNYCNQMMCCRKMTQGRCKPVNTFVHESLADVKAVCSOKKVTCCKDGTNICYOSKSTMRI TDCREIGSSKYPNCAYKTTQVEKHI IVACGGKPSVPVHFDASV----</p> <p><b>SARST:</b> aliSize=121 (resi) RMSD=9.43 (Å)<br/> e--SRKKFQROHMDSDSSPSSSTYCNQMMRRRNMTQGRCKPVNTFVHEPLVDVQNVCFJEKVTCKNGGNCYKSNSSMHI TDCRLNGSRYPNCAYRTSPKERHI IVACEISFYVPVHFDASV-veds<br/> -keSAAKFEROHMDSGNSASSSSNYCNQMMCCRKMTQGRCKPVNTFVHESLADVKAVCSOKKVTCCKDGTNICYOSKSTMRI TDCREIGSSKYPNCAYKTTQVEKHI IVACGGKPSVPVHFDASVv----</p> <p><b>BLAST:</b> aliSize=100 (resi) iden=70.97% (88/124) simi=80.65% (100/124)<br/> -ESRAKKFQROHMDSDSSPSSSTYCNQMMRRRNMTQGRCKPVNTFVHEPLVDVQNVCFJEKVTCKNGGNCYKSNSSMHI TDCRLNGSRYPNCAYRTSPKERHI IVACEISFYVPVHFDASVeds<br/> kESAAAKFEROHMDSGNSASSSSNYCNQMMCCRKMTQGRCKPVNTFVHESLADVKAVCSOKKVTCCKDGTNICYOSKSTMRI TDCREIGSSKYPNCAYKTTQVEKHI IVACGGKPSVPVHFDASV----</p> <p><b>Proposed:</b> aliSize=123 (resi) RMSD=0.95 (Å)<br/> -ESRAKKFQROHMDSDSSPSSSTYCNQMMRRRNMTQGRCKPVNTFVHEPLVDVQNVCFJEKVTCKNGGNCYKSNSSMHI TDCRLNGSRYPNCAYRTSPKERHI IVACEISFYVPVHFDASVeds<br/> kESAAAKFEROHMDSGNSASSSSNYCNQMMCCRKMTQGRCKPVNTFVHESLADVKAVCSOKKVTCCKDGTNICYOSKSTMRI TDCREIGSSKYPNCAYKTTQVEKHI IVACGGKPSVPVHFDASV----</p> |

|     |                                               |   |       |                                                                                                                                                                                                                                                                                                                                                                                                                                                                                                                                                                                                                                                                                                                                                                                                                                                                                                                                                                                                                                                                                                                                                                                                                                                                                                                                                                                                              |
|-----|-----------------------------------------------|---|-------|--------------------------------------------------------------------------------------------------------------------------------------------------------------------------------------------------------------------------------------------------------------------------------------------------------------------------------------------------------------------------------------------------------------------------------------------------------------------------------------------------------------------------------------------------------------------------------------------------------------------------------------------------------------------------------------------------------------------------------------------------------------------------------------------------------------------------------------------------------------------------------------------------------------------------------------------------------------------------------------------------------------------------------------------------------------------------------------------------------------------------------------------------------------------------------------------------------------------------------------------------------------------------------------------------------------------------------------------------------------------------------------------------------------|
| 924 | <p>2q4gX<br/>(126)</p> <p>1y94A<br/>(124)</p> | N | 69.35 | <p><b>TM-align:</b> aliSize=104 (resi) RMSD=1.01 (Å)<br/> esrakkfqrqhmdsdsps-----SSSTYCNQMMRRRNMTQGRCKPVNTFVHEP LVDVQNVCFQEKVTCKNGGNCYKSNSSMHI TDCRLTNGSRYPNCAYRTSPKERHI IVACEGSPYVPVHFDASVeds<br/> -----kesaaakferqhmdsstaasSNYCNLMCCRKMTQGRCKPVNTFVHESLADVKAVCSOKKVTKDGGTNCYOSKSTMRI TDCRETGSSKYPNCAYKITQVEKHI IVACGGKPSVPVHFDASV----</p> <p><b>SARST:</b> aliSize=118 (resi) RMSD=8.23 (Å)<br/> esra----KQFQROHMDSDSSPSSSTYCNQMMRRRNMTQGRCKPVNTFVHEP LVDVQNVCFQEKVTCKNGGNCYKSNSSMHI TDCRLTNGSRYPNCAYRTSPKERHI IVACEGSPYVPVHFDASV-veds<br/> ---kesaaakferqhmdsstaasSNYCNLMCCRKMTQGRCKPVNTFVHESLADVKAVCSOKKVTKDGGTNCYOSKSTMRI TDCRETGSSKYPNCAYKITQVEKHI IVACGGKPSVPVHFDASVv----</p> <p><b>BLAST:</b> aliSize=99 (resi) iden=69.35% (86/124) simi=79.84% (99/124)<br/> -ESRAKKFQROHMDSDSSPSSSTYCNQMMRRRNMTQGRCKPVNTFVHEP LVDVQNVCFQEKVTCKNGGNCYKSNSSMHI TDCRLTNGSRYPNCAYRTSPKERHI IVACEGSPYVPVHFDASVeds<br/> kESAAAKFEROHMDSSSTAASSSNYCNLMCCRKMTQGRCKPVNTFVHESLADVKAVCSOKKVTKDGGTNCYOSKSTMRI TDCRETGSSKYPNCAYKITQVEKHI IVACGGKPSVPVHFDASV----</p> <p><b>Proposed:</b> aliSize=123 (resi) RMSD=1.03 (Å)<br/> -ESRAKKFQROHMDSDSSPSSSTYCNQMMRRRNMTQGRCKPVNTFVHEP LVDVQNVCFQEKVTCKNGGNCYKSNSSMHI TDCRLTNGSRYPNCAYRTSPKERHI IVACEGSPYVPVHFDASVeds<br/> kESAAAKFEROHMDSSSTAASSSNYCNLMCCRKMTQGRCKPVNTFVHESLADVKAVCSOKKVTKDGGTNCYOSKSTMRI TDCRETGSSKYPNCAYKITQVEKHI IVACGGKPSVPVHFDASV----</p>                       |
| 925 | <p>2k11A<br/>(127)</p> <p>1lbgA<br/>(124)</p> | N | 67.74 | <p><b>TM-align:</b> aliSize=103 (resi) RMSD=1.45 (Å)<br/> kesrakkfqrqhmdsdsps-----SSSTYCNQMMRRRNMTQGRCKPVNTFVHEP LVDVQNVCFQEKVTC-KNGQgNCYKSNSSMHI TDCRLTNGSRYPNCAYRTSPKERHI IVACEGSPYVPVHFDASVeds<br/> -----kesaaakferqhmdsgnspSSNYCNLMCCRKMTQGRCKPVNTFVHESLADVKAVCSOKKVTKKNGQT-NCYOSKSTMRI TDCRETGSSKYPNCAYKITQVEKHI IVACGGKPSVPVHFDASV----</p> <p><b>SARST:</b> aliSize=120 (resi) RMSD=9.69 (Å)<br/> ke--SRKKFQROHMDSDSSPSSSTYCNQMMRRRNMTQGRCKPVNTFVHEP LVDVQNVCFQEKVTCKNGGNCYKSNSSMHI TDCRLTNGSRYPNCAYRTSPKERHI IVACEGSPYVPVHFDASV--sveds<br/> --kesaaakferqhmdsgnspSSSNYCNLMCCRKMTQGRCKPVNTFVHESLADVKAVCSOKKVTKKNGQT-NCYOSKSTMRI TDCRETGSSKYPNCAYKITQVEKHI IVACGGKPSVPVHFDASVsv----</p> <p><b>BLAST:</b> aliSize=101 (resi) iden=72.58% (90/124) simi=81.45% (101/124)<br/> KESRAKKFQROHMDSDSSPSSSTYCNQMMRRRNMTQGRCKPVNTFVHEP LVDVQNVCFQEKVTC-KNGQgNCYKSNSSMHI TDCRLTNGSRYPNCAYRTSPKERHI IVACEGSPYVPVHFDASVeds<br/> KESAAAKFEROHMDSGNSPSSSNYCNLMCCRKMTQGRCKPVNTFVHESLADVKAVCSOKKVTKKNGQT-NCYOSKSTMRI TDCRETGSSKYPNCAYKITQVEKHI IVACGGKPSVPVHFDASV----</p> <p><b>Proposed:</b> aliSize=121 (resi) RMSD=1.31 (Å)<br/> KESRAKKFQROHMDSDsSPS-S-SSSTYCNQMMRRRNMTQGRCKPVNTFVHEP LVDVQNVCFQEKVTC-KNGQgNCYKSNSSMHI TDCRLTNGSRYPNCAYRTSPKERHI IVACEGSPYVPVHFDASVeds<br/> KESAAAKFEROHMDS--GNSpSSSNYCNLMCCRKMTQGRCKPVNTFVHESLADVKAVCSOKKVTKKNGQT-NCYOSKSTMRI TDCRETGSSKYPNCAYKITQVEKHI IVACGGKPSVPVHFDASV----</p> |
| 926 | <p>2k11A<br/>(127)</p> <p>1y92B<br/>(124)</p> | N | 70.97 | <p><b>TM-align:</b> aliSize=104 (resi) RMSD=1.45 (Å)<br/> kesrakkfqrqhmdsdsps-----SSSTYCNQMMRRRNMTQGRCKPVNTFVHEP LVDVQNVCFQEKVTCKNGGNCYKSNSSMHI TDCRLTNGSRYPNCAYRTSPKERHI IVACEGSPYVPVHFDASVeds<br/> -----kesaaakferqhmdsgnsasSSNYCNLMCCRKMTQGRCKPVNTFVHESLADVKAVCSOKKVTKDGGTNCYOSKSTMRI TDCRETGSSKYPNCAYKITQVEKHI IVACGGKPSVPVHFDASV----</p> <p><b>SARST:</b> aliSize=121 (resi) RMSD=9.67 (Å)<br/> k-ESRAKKFQROHMDSDSSPSSSTYCNQMMRRRNMTQGRCKPVNTFVHEP LVDVQNVCFQEKVTCKNGGNCYKSNSSMHI TDCRLTNGSRYPNCAYRTSPKERHI IVACEGSPYVPVHFDASV--sveds<br/> -kESAAAKFEROHMDSGNSASSSNYCNLMCCRKMTQGRCKPVNTFVHESLADVKAVCSOKKVTKDGGTNCYOSKSTMRI TDCRETGSSKYPNCAYKITQVEKHI IVACGGKPSVPVHFDASVsv----</p> <p><b>BLAST:</b> aliSize=100 (resi) iden=70.97% (88/124) simi=80.65% (100/124)<br/> KESRAKKFQROHMDSDSSPSSSTYCNQMMRRRNMTQGRCKPVNTFVHEP LVDVQNVCFQEKVTC-KNGQgNCYKSNSSMHI TDCRLTNGSRYPNCAYRTSPKERHI IVACEGSPYVPVHFDASVeds<br/> KESAAAKFEROHMDSGNSASSSNYCNLMCCRKMTQGRCKPVNTFVHESLADVKAVCSOKKVTKDGGTNCYOSKSTMRI TDCRETGSSKYPNCAYKITQVEKHI IVACGGKPSVPVHFDASV----</p> <p><b>Proposed:</b> aliSize=124 (resi) RMSD=1.43 (Å)<br/> KESRAKKFQROHMDSDSSPSSSTYCNQMMRRRNMTQGRCKPVNTFVHEP LVDVQNVCFQEKVTCKNGGNCYKSNSSMHI TDCRLTNGSRYPNCAYRTSPKERHI IVACEGSPYVPVHFDASVeds<br/> KESAAAKFEROHMDSGNSASSSNYCNLMCCRKMTQGRCKPVNTFVHESLADVKAVCSOKKVTKDGGTNCYOSKSTMRI TDCRETGSSKYPNCAYKITQVEKHI IVACGGKPSVPVHFDASV----</p>                   |

|     |                                                     |   |       |                                                                                                                                                                                                                                                                                                                                                                                                                                                                                                                                                                                                                                                                                                                                                                                                                                                                                                                                                                                                                                                                                                                                                                                                                                                                                                                                                                                                                                  |
|-----|-----------------------------------------------------|---|-------|----------------------------------------------------------------------------------------------------------------------------------------------------------------------------------------------------------------------------------------------------------------------------------------------------------------------------------------------------------------------------------------------------------------------------------------------------------------------------------------------------------------------------------------------------------------------------------------------------------------------------------------------------------------------------------------------------------------------------------------------------------------------------------------------------------------------------------------------------------------------------------------------------------------------------------------------------------------------------------------------------------------------------------------------------------------------------------------------------------------------------------------------------------------------------------------------------------------------------------------------------------------------------------------------------------------------------------------------------------------------------------------------------------------------------------|
| 927 | <p>2k11A<br/>(127)</p> <hr/> <p>3bcoA<br/>(124)</p> | N | 68.55 | <p><b>TM-align:</b> aliSize=103 (resi) RMSD=1.45 (Å)<br/> kesrakkfqrqhm dsdssps-----SSSTYCNQMMRRRNMTQGRCKPVNTFVHEP LVDVQNVCFEKEVTC-KNGQgNCYKSNSSMHI TDCRLINGSRYPNCAYRTSPKERHIIVACEISFYVPVHFDA SVeds<br/> -----kesaakferqhmdsgnsasSSSNYCNQMMCCRKMTQGRCKPVNTFVHESLADVKAVCSOKKVTCkDGQT-NCYOSKSTMRI TDCREIGSSSKYPNCAYKTTQVEKHIIVACGGKPSVPVHFDA SV----</p> <p><b>SARST:</b> aliSize=117 (resi) RMSD=9.24 (Å)<br/> k-SSRKKFQROHM----DSDSspsSSTYCNQMMRRRNMTQGRCKPVNTFVHEP LVDVQNVCFEKEVTC-KNGQgNCYKSNSSMHI TDCRLINGSRYPNCAYRTSPKERHIIVACEISFYVPVHFDA--sveds<br/> -kESA AAKFEROHMds gnsSASS---SSNYCNQMMCCRKMTQGRCKPVNTFVHESLADVKAVCSOKKVTCkDGQT-NCYOSKSTMRI TDCREIGSSSKYPNCAYKTTQVEKHIIVACGGKPSVPVHFDA sv-----</p> <p><b>BLAST:</b> aliSize=101 (resi) iden=71.77% (89/124) simi=81.45% (101/124)<br/> KESRAKKFQROHMDSDSSPSSSSTYCNQMMRRRNMTQGRCKPVNTFVHEP LVDVQNVCFEKEVTC-KNGQgNCYKSNSSMHI TDCRLINGSRYPNCAYRTSPKERHIIVACEISFYVPVHFDA SVeds<br/> KESAAAKFEROHMDSGNSASSSSNYCNQMMCCRKMTQGRCKPVNTFVHESLADVKAVCSOKKVTCkDGQT-NCYOSKSTMRI TDCREIGSSSKYPNCAYKTTQVEKHIIVACGGKPSVPVHFDA SV----</p> <p><b>Proposed:</b> aliSize=121 (resi) RMSD=1.31 (Å)<br/> KESRAKKFQROHMDSDsSPS-S-SSTYCNQMMRRRNMTQGRCKPVNTFVHEP LVDVQNVCFEKEVTC-KNGQgNCYKSNSSMHI TDCRLINGSRYPNCAYRTSPKERHIIVACEISFYVPVHFDA SVeds<br/> KESAAAKFEROHMDS--GNSaSsSSNYCNQMMCCRKMTQGRCKPVNTFVHESLADVKAVCSOKKVTCkDGQT-NCYOSKSTMRI TDCREIGSSSKYPNCAYKTTQVEKHIIVACGGKPSVPVHFDA SV----</p> |
| 928 | <p>2k11A<br/>(127)</p> <hr/> <p>1y94A<br/>(124)</p> | N | 67.74 | <p><b>TM-align:</b> aliSize=103 (resi) RMSD=1.43 (Å)<br/> kesrakkfqrqhm dsdssps-----SSSTYCNQMMRRRNMTQGRCKPVNTFVHEP LVDVQNVCFEKEVTC-KNGQgNCYKSNSSMHI TDCRLINGSRYPNCAYRTSPKERHIIVACEISFYVPVHFDA SVeds<br/> -----kesaakferqhmdsstsaasSNYCNLMCCRKMTQGRCKPVNTFVHESLADVKAVCSOKKVTCkDGQT-NCYOSKSTMRI TDCREIGSSSKYPNCAYKTTQVEKHIIVACGGKPSVPVHFDA SV----</p> <p><b>SARST:</b> aliSize=102 (resi) RMSD=1.59 (Å)<br/> kesrakkfqrqhm dsdssps-----SSSTYCNQMMRRRNMTQGRCKPVNTFVHEP LVDVQNVCFEKEVTC-KNGQgNCYKSNSSMHI TDCRLINGSRYPNCAYRTSPKERHIIVACEISFYVPVHFDA--sveds<br/> -----kesaakferqhmdsstsaasSNYCNLMCCRKMTQGRCKPVNTFVHESLADVKAVCSOKKVTCkDGQT-NCYOSKSTMRI TDCREIGSSSKYPNCAYKTTQVEKHIIVACGGKPSVPVHFDA sv-----</p> <p><b>BLAST:</b> aliSize=100 (resi) iden=70.16% (87/124) simi=80.65% (100/124)<br/> KESRAKKFQROHMDSDSSPSSSSTYCNQMMRRRNMTQGRCKPVNTFVHEP LVDVQNVCFEKEVTC-KNGQgNCYKSNSSMHI TDCRLINGSRYPNCAYRTSPKERHIIVACEISFYVPVHFDA SVeds<br/> KESAAAKFEROHMDSSTSAASSNYCNLMCCRKMTQGRCKPVNTFVHESLADVKAVCSOKKVTCkDGQT-NCYOSKSTMRI TDCREIGSSSKYPNCAYKTTQVEKHIIVACGGKPSVPVHFDA SV----</p> <p><b>Proposed:</b> aliSize=121 (resi) RMSD=1.33 (Å)<br/> KESRAKKFQROHMDSDsSPS-SS-SSTYCNQMMRRRNMTQGRCKPVNTFVHEP LVDVQNVCFEKEVTC-KNGQgNCYKSNSSMHI TDCRLINGSRYPNCAYRTSPKERHIIVACEISFYVPVHFDA SVeds<br/> KESAAAKFEROHMDS--STSaASsSNYCNLMCCRKMTQGRCKPVNTFVHESLADVKAVCSOKKVTCkDGQT-NCYOSKSTMRI TDCREIGSSSKYPNCAYKTTQVEKHIIVACGGKPSVPVHFDA SV----</p>       |
| 929 | <p>2aasA<br/>(124)</p> <hr/> <p>1lbgA<br/>(124)</p> | N | 81.45 | <p><b>TM-align:</b> aliSize=104 (resi) RMSD=1.43 (Å)<br/> ketaaakferqhmdsstsa-----SSSNYCNQMMKSRNLTkDRCKPVNTFVHESLADVQAVCSOKNACKNGOTNCYOSYSTMSITDCREIGSSSKYPNCAYKTTQANKHIIVACEINFYVPVHFDA SV<br/> -----kesaakferqhmdsgnspSSSNYCNLMCCRKMTQGRCKPVNTFVHESLADVKAVCSOKKVTCkDGQT-NCYOSKSTMRI TDCREIGSSSKYPNCAYKTTQVEKHIIVACGGKPSVPVHFDA SV</p> <p><b>SARST:</b> aliSize=118 (resi) RMSD=8.84 (Å)<br/> keta----AAKFEROHMDS-STSAASsSNYCNQMMKSRNLTkDRCKPVNTFVHESLADVQAVCSOKNACKNGOTNCYOSYSTMSITDCREIGSSSKYPNCAYKTTQANKHIIVACEINFYVPVHFDA SV-v<br/> ----kesaAAKFEROHMDSgNSPSSS-SNYCNLMCCRKMTQGRCKPVNTFVHESLADVKAVCSOKKVTCkDGQT-NCYOSKSTMRI TDCREIGSSSKYPNCAYKTTQVEKHIIVACGGKPSVPVHFDA SV-</p> <p><b>BLAST:</b> aliSize=107 (resi) iden=81.45% (101/124) simi=86.29% (107/124)<br/> KETAAAKFEROHMDSSTSAASSNYCNQMMKSRNLTkDRCKPVNTFVHESLADVQAVCSOKNACKNGOTNCYOSYSTMSITDCREIGSSSKYPNCAYKTTQANKHIIVACEINFYVPVHFDA SV<br/> KESAAAKFEROHMDSGNSPSSSNYCNLMCCRKMTQGRCKPVNTFVHESLADVKAVCSOKKVTCkDGQT-NCYOSKSTMRI TDCREIGSSSKYPNCAYKTTQVEKHIIVACGGKPSVPVHFDA SV</p> <p><b>Proposed:</b> aliSize=124 (resi) RMSD=1.42 (Å)<br/> KETAAAKFEROHMDSSTSAASSNYCNQMMKSRNLTkDRCKPVNTFVHESLADVQAVCSOKNACKNGOTNCYOSYSTMSITDCREIGSSSKYPNCAYKTTQANKHIIVACEINFYVPVHFDA SV<br/> KESAAAKFEROHMDSGNSPSSSNYCNLMCCRKMTQGRCKPVNTFVHESLADVKAVCSOKKVTCkDGQT-NCYOSKSTMRI TDCREIGSSSKYPNCAYKTTQVEKHIIVACGGKPSVPVHFDA SV</p>                                                      |

|     |                                                     |   |       |                                                                                                                                                                                                                                                                                                                                                                                                                                                                                                                                                                                                                                                                                                                                                                                                                                                                                                                                                                                                                                                                                                                                                                                                                                                                                                                                                                                                                                                               |
|-----|-----------------------------------------------------|---|-------|---------------------------------------------------------------------------------------------------------------------------------------------------------------------------------------------------------------------------------------------------------------------------------------------------------------------------------------------------------------------------------------------------------------------------------------------------------------------------------------------------------------------------------------------------------------------------------------------------------------------------------------------------------------------------------------------------------------------------------------------------------------------------------------------------------------------------------------------------------------------------------------------------------------------------------------------------------------------------------------------------------------------------------------------------------------------------------------------------------------------------------------------------------------------------------------------------------------------------------------------------------------------------------------------------------------------------------------------------------------------------------------------------------------------------------------------------------------|
| 930 | <p>2aasA<br/>(124)</p> <hr/> <p>1y92B<br/>(124)</p> | N | 81.45 | <p>TM-align: aliSize=104 (resi) RMSD=1.37 (Å)<br/> ketaaakferqhmdss <b>tsaa</b>-----SSSSYCNQMMKSRNLTkDRCKPVNTFVHESLADVQAVCSQKNVACKNGOTNCYQSYSTMSITDCRETGSSKYPNCAYKTTQANKHIIVACENFYVPVHFDASV<br/> -----kesaaakferqhmdsgnsasSSSSYCNLMCCRKMTQGGCKPVNTFVHESLADVKAVCSQKKVTCKDGOTNCYQSKSTMRIIDCRETGSSKYPNCAYKTTQVEKHIIVACGGKPSVPVHFDASV</p> <p>SARST: aliSize=122 (resi) RMSD=9.68 (Å)<br/> k-ETAAAKFERQHMDSS<b>TSAA</b>SSSNYCNQMMKSRNLTkDRCKPVNTFVHESLADVQAVCSQKNVACKNGOTNCYQSYSTMSITDCRETGSSKYPNCAYKTTQANKHIIVACENFYVPVHFDASV-v<br/> -kESAAAKFERQHMDSGNS<b>AS</b>SSSNYCNLMCCRKMTQGGCKPVNTFVHESLADVKAVCSQKKVTCKDGOTNCYQSKSTMRIIDCRETGSSKYPNCAYKTTQVEKHIIVACGGKPSVPVHFDASV-v</p> <p>BLAST: aliSize=108 (resi) iden=81.45% (101/124) simi=87.10% (108/124)<br/> <b>KE</b>TAAAKFERQHMDSS<b>TSAA</b>SSSNYCNQMMKSRNLTkDRCKPVNTFVHESLADVQAVCSQKNVACKNGOTNCYQSYSTMSITDCRETGSSKYPNCAYKTTQANKHIIVACENFYVPVHFDASV<br/> <b>KE</b>SAAAKFERQHMDSGNS<b>AS</b>SSSNYCNLMCCRKMTQGGCKPVNTFVHESLADVKAVCSQKKVTCKDGOTNCYQSKSTMRIIDCRETGSSKYPNCAYKTTQVEKHIIVACGGKPSVPVHFDASV</p> <p>Proposed: aliSize=124 (resi) RMSD=1.38 (Å)<br/> <b>KE</b>TAAAKFERQHMDSS<b>TSAA</b>SSSNYCNQMMKSRNLTkDRCKPVNTFVHESLADVQAVCSQKNVACKNGOTNCYQSYSTMSITDCRETGSSKYPNCAYKTTQANKHIIVACENFYVPVHFDASV<br/> <b>KE</b>SAAAKFERQHMDSGNS<b>AS</b>SSSNYCNLMCCRKMTQGGCKPVNTFVHESLADVKAVCSQKKVTCKDGOTNCYQSKSTMRIIDCRETGSSKYPNCAYKTTQVEKHIIVACGGKPSVPVHFDASV</p>                                                         |
| 931 | <p>2aasA<br/>(124)</p> <hr/> <p>3bcoA<br/>(124)</p> | N | 82.26 | <p>TM-align: aliSize=104 (resi) RMSD=1.46 (Å)<br/> ketaaakferqhmdsst <b>saa</b>-----SSSSYCNQMMKSRNLTkDRCKPVNTFVHESLADVQAVCSQKNVACKNGOTNCYQSYSTMSITDCRETGSSKYPNCAYKTTQANKHIIVACENFYVPVHFDASV<br/> -----kesaaakferqhmdsgns <b>as</b>SSSNYCNQMMCCRKMTQGGCKPVNTFVHESLADVKAVCSQKKVTCKDGOTNCYQSKSTMRIIDCRETGSSKYPNCAYKTTQVEKHIIVACGGKPSVPVHFDASV</p> <p>SARST: aliSize=118 (resi) RMSD=9.22 (Å)<br/> k-ETAAAKFERQHMDSS<b>S</b>TS<b>sa</b>SSSNYCNQMMKSRNLTkDRCKPVNTFVHESLADVQAVCSQKNVACKNGOTNCYQSYSTMSITDCRETGSSKYPNCAYKTTQANKHIIVACENFYVPVHFDASV-v<br/> -kESAAAKFERQHMDSGNS<b>S</b>SSSNYCNQMMCCRKMTQGGCKPVNTFVHESLADVKAVCSQKKVTCKDGOTNCYQSKSTMRIIDCRETGSSKYPNCAYKTTQVEKHIIVACGGKPSVPVHFDASV-v</p> <p>BLAST: aliSize=109 (resi) iden=82.26% (102/124) simi=87.90% (109/124)<br/> <b>KE</b>TAAAKFERQHMDSS<b>TSAA</b>SSSNYCNQMMKSRNLTkDRCKPVNTFVHESLADVQAVCSQKNVACKNGOTNCYQSYSTMSITDCRETGSSKYPNCAYKTTQANKHIIVACENFYVPVHFDASV<br/> <b>KE</b>SAAAKFERQHMDSGNS<b>AS</b>SSSNYCNQMMCCRKMTQGGCKPVNTFVHESLADVKAVCSQKKVTCKDGOTNCYQSKSTMRIIDCRETGSSKYPNCAYKTTQVEKHIIVACGGKPSVPVHFDASV</p> <p>Proposed: aliSize=124 (resi) RMSD=1.41 (Å)<br/> <b>KE</b>TAAAKFERQHMDSS<b>TSAA</b>SSSNYCNQMMKSRNLTkDRCKPVNTFVHESLADVQAVCSQKNVACKNGOTNCYQSYSTMSITDCRETGSSKYPNCAYKTTQANKHIIVACENFYVPVHFDASV<br/> <b>KE</b>SAAAKFERQHMDSGNS<b>AS</b>SSSNYCNQMMCCRKMTQGGCKPVNTFVHESLADVKAVCSQKKVTCKDGOTNCYQSKSTMRIIDCRETGSSKYPNCAYKTTQVEKHIIVACGGKPSVPVHFDASV</p>                                      |
| 932 | <p>2aasA<br/>(124)</p> <hr/> <p>1y94A<br/>(124)</p> | N | 83.87 | <p>TM-align: aliSize=104 (resi) RMSD=1.52 (Å)<br/> ketaaakferqhmdsst <b>saa</b>-----SSSSYCNQMMKSRNLTkDRCKPVNTFVHESLADVQAVCSQKNVACKNGOTNCYQSYSTMSITDCRETGSSKYPNCAYKTTQANKHIIVACENFYVPVHFDASV<br/> -----kesaaakferqhmdsst <b>saa</b>SSSNYCNLMCCRKMTQGGCKPVNTFVHESLADVKAVCSQKKVTCKDGOTNCYQSKSTMRIIDCRETGSSKYPNCAYKTTQVEKHIIVACGGKPSVPVHFDASV</p> <p>SARST: aliSize=118 (resi) RMSD=9.28 (Å)<br/> k-ETAAAKFERQHMDSS<b>S</b>TS<b>sa</b>SSSNYCNQMMKSRNLTkDRCKPVNTFVHESLADVQAVCSQKNVACKNGOTNCYQSYSTMSITDCRETGSSKYPNCAYKTTQANKHIIVACENFYVPVHFDASV-v<br/> -kESAAAKFERQHMDSS<b>S</b>TS<b>sa</b>SSSNYCNLMCCRKMTQGGCKPVNTFVHESLADVKAVCSQKKVTCKDGOTNCYQSKSTMRIIDCRETGSSKYPNCAYKTTQVEKHIIVACGGKPSVPVHFDASV-v</p> <p>BLAST: aliSize=110 (resi) iden=83.87% (104/124) simi=88.71% (110/124)<br/> <b>KE</b>TAAAKFERQHMDSS<b>S</b>TS<b>sa</b>SSSNYCNQMMKSRNLTkDRCKPVNTFVHESLADVQAVCSQKNVACKNGOTNCYQSYSTMSITDCRETGSSKYPNCAYKTTQANKHIIVACENFYVPVHFDASV<br/> <b>KE</b>SAAAKFERQHMDSS<b>S</b>TS<b>sa</b>SSSNYCNLMCCRKMTQGGCKPVNTFVHESLADVKAVCSQKKVTCKDGOTNCYQSKSTMRIIDCRETGSSKYPNCAYKTTQVEKHIIVACGGKPSVPVHFDASV</p> <p>Proposed: aliSize=124 (resi) RMSD=1.47 (Å)<br/> <b>KE</b>TAAAKFERQHMDSS<b>S</b>TS<b>sa</b>SSSNYCNQMMKSRNLTkDRCKPVNTFVHESLADVQAVCSQKNVACKNGOTNCYQSYSTMSITDCRETGSSKYPNCAYKTTQANKHIIVACENFYVPVHFDASV<br/> <b>KE</b>SAAAKFERQHMDSS<b>S</b>TS<b>sa</b>SSSNYCNLMCCRKMTQGGCKPVNTFVHESLADVKAVCSQKKVTCKDGOTNCYQSKSTMRIIDCRETGSSKYPNCAYKTTQVEKHIIVACGGKPSVPVHFDASV</p> |

|     |                |   |       |                                                                                                                                                                                                                                                                                                                                                                                                                                                                                                                                                                                                                                                                                                                                                                                                                                                                                                                                                                                                                                                                                                                                                                                                                                                                                                                   |
|-----|----------------|---|-------|-------------------------------------------------------------------------------------------------------------------------------------------------------------------------------------------------------------------------------------------------------------------------------------------------------------------------------------------------------------------------------------------------------------------------------------------------------------------------------------------------------------------------------------------------------------------------------------------------------------------------------------------------------------------------------------------------------------------------------------------------------------------------------------------------------------------------------------------------------------------------------------------------------------------------------------------------------------------------------------------------------------------------------------------------------------------------------------------------------------------------------------------------------------------------------------------------------------------------------------------------------------------------------------------------------------------|
| 933 | 2nuiA<br>(124) | N | 80.65 | <p>TM-align: aliSize=104 (resi) RMSD=0.79 (Å)<br/> ketaaakferqhmdsstaa-----SSSNYCNQMMKSRNLTKDRCKPVNTFVHESLADVQAVCSQKNACKNGOTNCYQSYSTMSTIACRETGSSKYPNCAYKTTQANKHIIVACEINFYVPVHFDASV<br/> -----kesaaakferqhmdsgnspssSSSNYCNLMCCRKMTQGGCKPVNTFVHESLADVKAVCSQKKVTCKNGOTNCYQSKSTMRIIDCRETGSSKYPNCAYKTTQVEKHIIVACGGKPSVPVHFDASV</p> <p>SARST: aliSize=121 (resi) RMSD=9.85 (Å)<br/> k-ETAAAKFERQHMDSTSAASS-SNYCNQMMKSRNLTKDRCKPVNTFVHESLADVQAVCSQKNACKNGOTNCYQSYSTMSTIACRETGSSKYPNCAYKTTQANKHIIVACEINFYVPVHFDAS-v<br/> -kESAAAKFERQHMDS-GNSPSSSNYCNLMCCRKMTQGGCKPVNTFVHESLADVKAVCSQKKVTCKNGOTNCYQSKSTMRIIDCRETGSSKYPNCAYKTTQVEKHIIVACGGKPSVPVHFDASv-</p> <p>BLAST: aliSize=106 (resi) iden=80.65% (100/124) simi=85.48% (106/124)<br/> KETAAAKFERQHMDSTSAASSSNYCNQMMKSRNLTKDRCKPVNTFVHESLADVQAVCSQKNACKNGOTNCYQSYSTMSTIACRETGSSKYPNCAYKTTQANKHIIVACEINFYVPVHFDASV<br/> KESAAAKFERQHMDSGNSPSSSNYCNLMCCRKMTQGGCKPVNTFVHESLADVKAVCSQKKVTCKNGOTNCYQSKSTMRIIDCRETGSSKYPNCAYKTTQVEKHIIVACGGKPSVPVHFDASV</p> <p>Proposed: aliSize=124 (resi) RMSD=0.84 (Å)<br/> KETAAAKFERQHMDSTSAASSSNYCNQMMKSRNLTKDRCKPVNTFVHESLADVQAVCSQKNACKNGOTNCYQSYSTMSTIACRETGSSKYPNCAYKTTQANKHIIVACEINFYVPVHFDASV<br/> KESAAAKFERQHMDSGNSPSSSNYCNLMCCRKMTQGGCKPVNTFVHESLADVKAVCSQKKVTCKNGOTNCYQSKSTMRIIDCRETGSSKYPNCAYKTTQVEKHIIVACGGKPSVPVHFDASV</p> |
|     | 1lbgA<br>(124) |   |       |                                                                                                                                                                                                                                                                                                                                                                                                                                                                                                                                                                                                                                                                                                                                                                                                                                                                                                                                                                                                                                                                                                                                                                                                                                                                                                                   |
| 934 | 2nuiA<br>(124) | N | 80.65 | <p>TM-align: aliSize=104 (resi) RMSD=0.83 (Å)<br/> ketaaakferqhmdsstaa-----SSSNYCNQMMKSRNLTKDRCKPVNTFVHESLADVQAVCSQKNACKNGOTNCYQSYSTMSTIACRETGSSKYPNCAYKTTQANKHIIVACEINFYVPVHFDASV<br/> -----kesaaakferqhmdsgnsasSSSNYCNLMCCRKMTQGGCKPVNTFVHESLADVKAVCSQKKVTCKDGTNCYQSKSTMRIIDCRETGSSKYPNCAYKTTQVEKHIIVACGGKPSVPVHFDASV</p> <p>SARST: aliSize=122 (resi) RMSD=9.72 (Å)<br/> k-ETAAAKFERQHMDSTSAASSSNYCNQMMKSRNLTKDRCKPVNTFVHESLADVQAVCSQKNACKNGOTNCYQSYSTMSTIACRETGSSKYPNCAYKTTQANKHIIVACEINFYVPVHFDAS-v<br/> -kESAAAKFERQHMDS-GNSASSSNYCNLMCCRKMTQGGCKPVNTFVHESLADVKAVCSQKKVTCKDGTNCYQSKSTMRIIDCRETGSSKYPNCAYKTTQVEKHIIVACGGKPSVPVHFDASv-</p> <p>BLAST: aliSize=107 (resi) iden=80.65% (100/124) simi=86.29% (107/124)<br/> KETAAAKFERQHMDSTSAASSSNYCNQMMKSRNLTKDRCKPVNTFVHESLADVQAVCSQKNACKNGOTNCYQSYSTMSTIACRETGSSKYPNCAYKTTQANKHIIVACEINFYVPVHFDASV<br/> KESAAAKFERQHMDS-GNSASSSNYCNLMCCRKMTQGGCKPVNTFVHESLADVKAVCSQKKVTCKDGTNCYQSKSTMRIIDCRETGSSKYPNCAYKTTQVEKHIIVACGGKPSVPVHFDASV</p> <p>Proposed: aliSize=124 (resi) RMSD=0.87 (Å)<br/> KETAAAKFERQHMDSTSAASSSNYCNQMMKSRNLTKDRCKPVNTFVHESLADVQAVCSQKNACKNGOTNCYQSYSTMSTIACRETGSSKYPNCAYKTTQANKHIIVACEINFYVPVHFDASV<br/> KESAAAKFERQHMDS-GNSASSSNYCNLMCCRKMTQGGCKPVNTFVHESLADVKAVCSQKKVTCKDGTNCYQSKSTMRIIDCRETGSSKYPNCAYKTTQVEKHIIVACGGKPSVPVHFDASV</p>     |
|     | 1y92B<br>(124) |   |       |                                                                                                                                                                                                                                                                                                                                                                                                                                                                                                                                                                                                                                                                                                                                                                                                                                                                                                                                                                                                                                                                                                                                                                                                                                                                                                                   |
| 935 | 2nuiA<br>(124) | N | 81.45 | <p>TM-align: aliSize=104 (resi) RMSD=0.86 (Å)<br/> ketaaakferqhmdsstaa-----SSSNYCNQMMKSRNLTKDRCKPVNTFVHESLADVQAVCSQKNACKNGOTNCYQSYSTMSTIACRETGSSKYPNCAYKTTQANKHIIVACEINFYVPVHFDASV<br/> -----kesaaakferqhmdsgnsasSSSNYCNQMMCCRKMTQGGCKPVNTFVHESLADVKAVCSQKKVTCKDGTNCYQSKSTMRIIDCRETGSSKYPNCAYKTTQVEKHIIVACGGKPSVPVHFDASV</p> <p>SARST: aliSize=121 (resi) RMSD=9.62 (Å)<br/> k-ETAAAKFERQHMDSTSAASS-SNYCNQMMKSRNLTKDRCKPVNTFVHESLADVQAVCSQKNACKNGOTNCYQSYSTMSTIACRETGSSKYPNCAYKTTQANKHIIVACEINFYVPVHFDAS-v<br/> -kESAAAKFERQHMDS-GNSASSSNYCNQMMCCRKMTQGGCKPVNTFVHESLADVKAVCSQKKVTCKDGTNCYQSKSTMRIIDCRETGSSKYPNCAYKTTQVEKHIIVACGGKPSVPVHFDASv-</p> <p>BLAST: aliSize=108 (resi) iden=81.45% (101/124) simi=87.10% (108/124)<br/> KETAAAKFERQHMDSTSAASSSNYCNQMMKSRNLTKDRCKPVNTFVHESLADVQAVCSQKNACKNGOTNCYQSYSTMSTIACRETGSSKYPNCAYKTTQANKHIIVACEINFYVPVHFDASV<br/> KESAAAKFERQHMDSGNSASSSNYCNQMMCCRKMTQGGCKPVNTFVHESLADVKAVCSQKKVTCKDGTNCYQSKSTMRIIDCRETGSSKYPNCAYKTTQVEKHIIVACGGKPSVPVHFDASV</p> <p>Proposed: aliSize=124 (resi) RMSD=0.83 (Å)<br/> KETAAAKFERQHMDSTSAASSSNYCNQMMKSRNLTKDRCKPVNTFVHESLADVQAVCSQKNACKNGOTNCYQSYSTMSTIACRETGSSKYPNCAYKTTQANKHIIVACEINFYVPVHFDASV<br/> KESAAAKFERQHMDSGNSASSSNYCNQMMCCRKMTQGGCKPVNTFVHESLADVKAVCSQKKVTCKDGTNCYQSKSTMRIIDCRETGSSKYPNCAYKTTQVEKHIIVACGGKPSVPVHFDASV</p>  |
|     | 3bcoA<br>(124) |   |       |                                                                                                                                                                                                                                                                                                                                                                                                                                                                                                                                                                                                                                                                                                                                                                                                                                                                                                                                                                                                                                                                                                                                                                                                                                                                                                                   |



|     |                                                     |   |       |                                                                                                                                                                                                                                                                                                                                                                                                                                                                                                                                                                                                                                                                                                                                                                                                                                                                                                                                                                                                                                                                                                                                                                                                                                                                                                                             |
|-----|-----------------------------------------------------|---|-------|-----------------------------------------------------------------------------------------------------------------------------------------------------------------------------------------------------------------------------------------------------------------------------------------------------------------------------------------------------------------------------------------------------------------------------------------------------------------------------------------------------------------------------------------------------------------------------------------------------------------------------------------------------------------------------------------------------------------------------------------------------------------------------------------------------------------------------------------------------------------------------------------------------------------------------------------------------------------------------------------------------------------------------------------------------------------------------------------------------------------------------------------------------------------------------------------------------------------------------------------------------------------------------------------------------------------------------|
| 936 | <p>2nuiA<br/>(124)</p> <hr/> <p>1y94A<br/>(124)</p> | N | 83.06 | <p>TM-align: aliSize=104 (resi) RMSD=0.93 (Å)<br/> ketaaakferqhmdsstaa-----SSSNYCNLMCKRMTQGKCKPVNTFVHESLADVKAVCSQKNVTKCKDGOTNCYOSKSTMRIIDCRETGSSKYPNCAYKTTQVEKHIIVACGGKPSVPVHFDASV<br/> -----kesaaakferqhmdsstaaSSSNYCNLMCKRMTQGKCKPVNTFVHESLADVKAVCSQKNVTKCKDGOTNCYOSKSTMRIIDCRETGSSKYPNCAYKTTQVEKHIIVACGGKPSVPVHFDASV</p> <p>SARST: aliSize=121 (resi) RMSD=9.61 (Å)<br/> k-ETAAAKFERQHMD-SSTAASSSNYCNLMCKRMTQGKCKPVNTFVHESLADVKAVCSQKNVTKCKDGOTNCYOSKSTMRIIDCRETGSSKYPNCAYKTTQVEKHIIVACGGKPSVPVHFDASV-v<br/> -kESAAAKFERQHMD-SSTAASSSNYCNLMCKRMTQGKCKPVNTFVHESLADVKAVCSQKNVTKCKDGOTNCYOSKSTMRIIDCRETGSSKYPNCAYKTTQVEKHIIVACGGKPSVPVHFDASV-v</p> <p>BLAST: aliSize=109 (resi) iden=83.06% (103/124) simi=87.90% (109/124)<br/> KETAAAKFERQHMD-SSTAASSSNYCNLMCKRMTQGKCKPVNTFVHESLADVKAVCSQKNVTKCKDGOTNCYOSKSTMRIIDCRETGSSKYPNCAYKTTQVEKHIIVACGGKPSVPVHFDASV<br/> KESAAAKFERQHMD-SSTAASSSNYCNLMCKRMTQGKCKPVNTFVHESLADVKAVCSQKNVTKCKDGOTNCYOSKSTMRIIDCRETGSSKYPNCAYKTTQVEKHIIVACGGKPSVPVHFDASV</p> <p>Proposed: aliSize=124 (resi) RMSD=0.89 (Å)<br/> KETAAAKFERQHMD-SSTAASSSNYCNLMCKRMTQGKCKPVNTFVHESLADVKAVCSQKNVTKCKDGOTNCYOSKSTMRIIDCRETGSSKYPNCAYKTTQVEKHIIVACGGKPSVPVHFDASV<br/> KESAAAKFERQHMD-SSTAASSSNYCNLMCKRMTQGKCKPVNTFVHESLADVKAVCSQKNVTKCKDGOTNCYOSKSTMRIIDCRETGSSKYPNCAYKTTQVEKHIIVACGGKPSVPVHFDASV</p>       |
| 937 | <p>1qwqA<br/>(124)</p> <hr/> <p>1lbgA<br/>(124)</p> | N | 92.74 | <p>TM-align: aliSize=105 (resi) RMSD=2.01 (Å)<br/> kesaaakferqhmdsgnsp-----SSSNYCNLMCKRMTQGKCKPVNTFVHESLADVKAVCSQKNVTKCKDGOTNCYOSKSTMRIIDCRETGSSKYPNCAYKTTQVEKHIIVACGGKPSVPVHFDASV<br/> -----kesaaakferqhmdsgnspSSSNYCNLMCKRMTQGKCKPVNTFVHESLADVKAVCSQKNVTKCKDGOTNCYOSKSTMRIIDCRETGSSKYPNCAYKTTQVEKHIIVACGGKPSVPVHFDASV</p> <p>SARST: aliSize=118 (resi) RMSD=8.80 (Å)<br/> kesaa---AKFERQHMDSGNSPS--SSSNYCNLMCKRMTQGKCKPVNTFVHESLADVKAVCSQKNVTKCKDGOTNCYOSKSTMRIIDCRETGSSKYPNCAYKTTQVEKHIIVACGGKPSVPVHFDASV-v<br/> ----kesAAKFERQHMDSGNSPSSSSNYCNLMCKRMTQGKCKPVNTFVHESLADVKAVCSQKNVTKCKDGOTNCYOSKSTMRIIDCRETGSSKYPNCAYKTTQVEKHIIVACGGKPSVPVHFDASV-v</p> <p>BLAST: aliSize=124 (resi) iden=99.19% (123/124) simi=100.00% (124/124)<br/> KESAAAKFERQHMDSGNSPSSSNYCNLMCKRMTQGKCKPVNTFVHESLADVKAVCSQKNVTKCKDGOTNCYOSKSTMRIIDCRETGSSKYPNCAYKTTQVEKHIIVACGGKPSVPVHFDASV<br/> KESAAAKFERQHMDSGNSPSSSNYCNLMCKRMTQGKCKPVNTFVHESLADVKAVCSQKNVTKCKDGOTNCYOSKSTMRIIDCRETGSSKYPNCAYKTTQVEKHIIVACGGKPSVPVHFDASV</p> <p>Proposed: aliSize=121 (resi) RMSD=1.79 (Å)<br/> KESAAAKFERQHMDSGNSP-SSSNYCNLMCKRMTQGKCKPVNTFVHESLADVKAVCSQKNVTKCKDGOTNCYOSKSTMRIIDCRET-gSSKYPNCAYKTTQVEKHIIVACGGKPSVPVHFDASV<br/> KESAAAKFERQHMDSGNSPSSSNYCNLMCKRMTQGKCKPVNTFVHESLADVKAVCSQKNVTKCKDGOTNCYOSKSTMRIIDCRET-gSSKYPNCAYKTTQVEKHIIVACGGKPSVPVHFDASV</p> |
| 938 | <p>1qwqA<br/>(124)</p> <hr/> <p>1y92B<br/>(124)</p> | N | 98.39 | <p>TM-align: aliSize=105 (resi) RMSD=1.78 (Å)<br/> kesaaakferqhmdsgnsp-----SSSNYCNLMCKRMTQGKCKPVNTFVHESLADVKAVCSQKNVTKCKDGOTNCYOSKSTMRIIDCRETGSSKYPNCAYKTTQVEKHIIVACGGKPSVPVHFDASV<br/> -----kesaaakferqhmdsgnspSSSNYCNLMCKRMTQGKCKPVNTFVHESLADVKAVCSQKNVTKCKDGOTNCYOSKSTMRIIDCRETGSSKYPNCAYKTTQVEKHIIVACGGKPSVPVHFDASV</p> <p>SARST: aliSize=118 (resi) RMSD=8.53 (Å)<br/> kesaa---AKFERQHMDSG--NSPSSSNYCNLMCKRMTQGKCKPVNTFVHESLADVKAVCSQKNVTKCKDGOTNCYOSKSTMRIIDCRETGSSKYPNCAYKTTQVEKHIIVACGGKPSVPVHFDASV-v<br/> ----kesAAKFERQHMDSGNSASSSNYCNLMCKRMTQGKCKPVNTFVHESLADVKAVCSQKNVTKCKDGOTNCYOSKSTMRIIDCRETGSSKYPNCAYKTTQVEKHIIVACGGKPSVPVHFDASV-v</p> <p>BLAST: aliSize=123 (resi) iden=99.19% (123/124) simi=99.19% (123/124)<br/> KESAAAKFERQHMDSGNSPSSSNYCNLMCKRMTQGKCKPVNTFVHESLADVKAVCSQKNVTKCKDGOTNCYOSKSTMRIIDCRETGSSKYPNCAYKTTQVEKHIIVACGGKPSVPVHFDASV<br/> KESAAAKFERQHMDSGNSASSSNYCNLMCKRMTQGKCKPVNTFVHESLADVKAVCSQKNVTKCKDGOTNCYOSKSTMRIIDCRETGSSKYPNCAYKTTQVEKHIIVACGGKPSVPVHFDASV</p> <p>Proposed: aliSize=123 (resi) RMSD=1.59 (Å)<br/> KESAAAKFERQHMDSGNSPSSSNYCNLMCKRMTQGKCKPVNTFVHESLADVKAVCSQKNVTKCKDGOTNCYOSKSTMRIIDCRET-gSSKYPNCAYKTTQVEKHIIVACGGKPSVPVHFDASV<br/> KESAAAKFERQHMDSGNSASSSNYCNLMCKRMTQGKCKPVNTFVHESLADVKAVCSQKNVTKCKDGOTNCYOSKSTMRIIDCRET-gSSKYPNCAYKTTQVEKHIIVACGGKPSVPVHFDASV</p>     |

|     |                                               |   |       |                                                                                                                                                                                                                                                                                                                                                                                                                                                                                                                                                                                                                                                                                                                                                                                                                                                                                                                                                                                                                                                                                                                                                                                                                                                                                                                                             |
|-----|-----------------------------------------------|---|-------|---------------------------------------------------------------------------------------------------------------------------------------------------------------------------------------------------------------------------------------------------------------------------------------------------------------------------------------------------------------------------------------------------------------------------------------------------------------------------------------------------------------------------------------------------------------------------------------------------------------------------------------------------------------------------------------------------------------------------------------------------------------------------------------------------------------------------------------------------------------------------------------------------------------------------------------------------------------------------------------------------------------------------------------------------------------------------------------------------------------------------------------------------------------------------------------------------------------------------------------------------------------------------------------------------------------------------------------------|
| 939 | <p>1qwqA<br/>(124)</p> <p>3bcoA<br/>(124)</p> | N | 92.74 | <p>TM-align: aliSize=104 (resi) RMSD=1.88 (Å)<br/> kesaaakferqhmdsgnsp-----SSSSNYCNLMCCRKMTQGKCKPVNTFVHESLADVAVCSQKKVTC-KDGQ-TCNYQSKSTMRI TDCRETGSSKYPNCAYKTTQVEKHI IVACGGKPSVPVHFDASV<br/> -----kesaaakferqhmdsgnsaSSSSNYCNLMCCRKMTQGKCKPVNTFVHESLADVAVCSQKKVTCkDGQ-TCNYQSKSTMRI TDCRETGSSKYPNCAYKTTQVEKHI IVACGGKPSVPVHFDASV</p> <p>SARST: aliSize=122 (resi) RMSD=9.71 (Å)<br/> k-ESAAAKFEROHMDSGNSPSSSSNYCNLMCCRKMTQGKCKPVNTFVHESLADVAVCSQKKVTCkDGQTCNYQSKSTMRI TDCRETGSSKYPNCAYKTTQVEKHI IVACGGKPSVPVHFDASV -v<br/> -kESAAAKFEROHMDSGNSASSSSNYCNLMCCRKMTQGKCKPVNTFVHESLADVAVCSQKKVTCkDGQTCNYQSKSTMRI TDCRETGSSKYPNCAYKTTQVEKHI IVACGGKPSVPVHFDASV -v</p> <p>BLAST: aliSize=122 (resi) iden=98.39% (122/124) simi=98.39% (122/124)<br/> KESAAAKFEROHMDSGNSPSSSSNYCNLMCCRKMTQGKCKPVNTFVHESLADVAVCSQKKVTCkDGQTCNYQSKSTMRI TDCRETGSSKYPNCAYKTTQVEKHI IVACGGKPSVPVHFDASV<br/> KESAAAKFEROHMDSGNSASSSSNYCNLMCCRKMTQGKCKPVNTFVHESLADVAVCSQKKVTCkDGQTCNYQSKSTMRI TDCRETGSSKYPNCAYKTTQVEKHI IVACGGKPSVPVHFDASV</p> <p>Proposed: aliSize=121 (resi) RMSD=1.78 (Å)<br/> k-ESAAAKFEROHMDSGNSPSSSSNYCNLMCCRKMTQGKCKPVNTFVHESLADVAVCSQKKVTC-KDGQTCNYQSKSTMRI TDCRET-gSSKYPNCAYKTTQVEKHI IVACGGKPSVPVHFDASV<br/> -kESAAAKFEROHMDSGNSASSSSNYCNLMCCRKMTQGKCKPVNTFVHESLADVAVCSQKKVTCkDGQTCNYQSKSTMRI TDCRET-gSSKYPNCAYKTTQVEKHI IVACGGKPSVPVHFDASV</p>   |
| 940 | <p>1qwqA<br/>(124)</p> <p>1y94A<br/>(124)</p> | N | 95.97 | <p>TM-align: aliSize=105 (resi) RMSD=1.87 (Å)<br/> kesaaakferqhmdsgnsp-----SSSSNYCNLMCCRKMTQGKCKPVNTFVHESLADVAVCSQKKVTCkDGQTCNYQSKSTMRI TDCRETGSSKYPNCAYKTTQVEKHI IVACGGKPSVPVHFDASV<br/> -----kesaaakferqhmdsstsaASSSNYCNLMCCRKMTQGKCKPVNTFVHESLADVAVCSQKKVTCkDGQTCNYQSKSTMRI TDCRETGSSKYPNCAYKTTQVEKHI IVACGGKPSVPVHFDASV</p> <p>SARST: aliSize=119 (resi) RMSD=8.77 (Å)<br/> kesa----AAKFEROHMDSGNSPSSSSNYCNLMCCRKMTQGKCKPVNTFVHESLADVAVCSQKKVTCkDGQTCNYQSKSTMRI TDCRETGSSKYPNCAYKTTQVEKHI IVACGGKPSVPVHFDASV -v<br/> ----kesaAAKFEROHMDSSTSAASSSNYCNLMCCRKMTQGKCKPVNTFVHESLADVAVCSQKKVTCkDGQTCNYQSKSTMRI TDCRETGSSKYPNCAYKTTQVEKHI IVACGGKPSVPVHFDASV -v</p> <p>BLAST: aliSize=121 (resi) iden=96.77% (120/124) simi=97.58% (121/124)<br/> KESAAAKFEROHMDSGNSPSSSSNYCNLMCCRKMTQGKCKPVNTFVHESLADVAVCSQKKVTCkDGQTCNYQSKSTMRI TDCRETGSSKYPNCAYKTTQVEKHI IVACGGKPSVPVHFDASV<br/> KESAAAKFEROHMDSSTSAASSSNYCNLMCCRKMTQGKCKPVNTFVHESLADVAVCSQKKVTCkDGQTCNYQSKSTMRI TDCRETGSSKYPNCAYKTTQVEKHI IVACGGKPSVPVHFDASV</p> <p>Proposed: aliSize=122 (resi) RMSD=1.79 (Å)<br/> KESAAAKFEROHMDSG-nSPSSSSNYCNLMCCRKMTQGKCKPVNTFVHESLADVAVCSQKKVTCkDGQTCNYQSKSTMRI TDCRET-gSSKYPNCAYKTTQVEKHI IVACGGKPSVPVHFDASV<br/> KESAAAKFEROHMDSST-SAASSSNYCNLMCCRKMTQGKCKPVNTFVHESLADVAVCSQKKVTCkDGQTCNYQSKSTMRI TDCRET-gSSKYPNCAYKTTQVEKHI IVACGGKPSVPVHFDASV</p> |
| 941 | <p>lizpA<br/>(124)</p> <p>1lbgA<br/>(124)</p> | N | 80.65 | <p>TM-align: aliSize=104 (resi) RMSD=0.85 (Å)<br/> ketaaakferqhmdsstsa-----SSSNYCNLMKSRNLTkDRCKPVNTLVHESLADVAVCSQKNVACKNGQTCNYQSYSTMSITDCRETGSSKYPNCAYKTTQANKHI IVACEINFYVPVHFDASV<br/> -----kesaaakferqhmdsgnspSSSNYCNLMCCRKMTQGKCKPVNTFVHESLADVAVCSQKKVTCkNGQTCNYQSKSTMRI TDCRETGSSKYPNCAYKTTQVEKHI IVACGGKPSVPVHFDASV</p> <p>SARST: aliSize=121 (resi) RMSD=9.79 (Å)<br/> k-ETAAAKFEROHMDS-STSAASSNYCNLMKSRNLTkDRCKPVNTLVHESLADVAVCSQKNVACKNGQTCNYQSYSTMSITDCRETGSSKYPNCAYKTTQANKHI IVACEINFYVPVHFDASV -v<br/> -kESAAAKFEROHMDSgNSPSSS-SNYCNLMCCRKMTQGKCKPVNTFVHESLADVAVCSQKKVTCkNGQTCNYQSKSTMRI TDCRETGSSKYPNCAYKTTQVEKHI IVACGGKPSVPVHFDASV -v</p> <p>BLAST: aliSize=106 (resi) iden=80.65% (100/124) simi=85.48% (106/124)<br/> KETAAAKFEROHMDSSTSAASSNYCNLMKSRNLTkDRCKPVNTLVHESLADVAVCSQKNVACKNGQTCNYQSYSTMSITDCRETGSSKYPNCAYKTTQANKHI IVACEINFYVPVHFDASV<br/> KESAAAKFEROHMDSGNSPSSS-SNYCNLMCCRKMTQGKCKPVNTFVHESLADVAVCSQKKVTCkNGQTCNYQSKSTMRI TDCRETGSSKYPNCAYKTTQVEKHI IVACGGKPSVPVHFDASV</p> <p>Proposed: aliSize=124 (resi) RMSD=0.89 (Å)<br/> KETAAAKFEROHMDSSTSAASSNYCNLMKSRNLTkDRCKPVNTLVHESLADVAVCSQKNVACKNGQTCNYQSYSTMSITDCRETGSSKYPNCAYKTTQANKHI IVACEINFYVPVHFDASV<br/> KESAAAKFEROHMDSGNSPSSS-SNYCNLMCCRKMTQGKCKPVNTFVHESLADVAVCSQKKVTCkNGQTCNYQSKSTMRI TDCRETGSSKYPNCAYKTTQVEKHI IVACGGKPSVPVHFDASV</p>                |

|     |                                             |   |       |                                                                                                                                                                                                                                                                                                                                                                                                                                                                                                                                                                                                                                                                                                                                                                                                                                                                                                                                                                                                                                                                                                                                                                                                                                                                                                                                                                                                   |
|-----|---------------------------------------------|---|-------|---------------------------------------------------------------------------------------------------------------------------------------------------------------------------------------------------------------------------------------------------------------------------------------------------------------------------------------------------------------------------------------------------------------------------------------------------------------------------------------------------------------------------------------------------------------------------------------------------------------------------------------------------------------------------------------------------------------------------------------------------------------------------------------------------------------------------------------------------------------------------------------------------------------------------------------------------------------------------------------------------------------------------------------------------------------------------------------------------------------------------------------------------------------------------------------------------------------------------------------------------------------------------------------------------------------------------------------------------------------------------------------------------|
| 942 | <p>lizpA (124)</p> <hr/> <p>ly92B (124)</p> | N | 80.65 | <p>TM-align: aliSize=104 (resi) RMSD=0.77 (Å)<br/> ketaaakferqhmds <b>tsaa</b>-----SSSNYCNQMMKSRNLTkDRCKPVNTLVHESLADVQAVCSQKNVACKNGOTNCYQSYSTMSITDCRETGSSKYPNCAYKTTQANKHIIVACENFYVPVHFDASV<br/> -----kesaakferqhmdsgnsasSSSNYCNLMCCRKMTQGGCKPVNTFVHESLADVKAVCSQKKVTCKDGOTNCYQSKSTMRIIDCRETGSSKYPNCAYKTTQVEKHIIVACGGKPSVPVHFDASV</p> <p>SARST: aliSize=122 (resi) RMSD=9.69 (Å)<br/> k-ETAAAKFERQHMD<b>SSTAASS</b>SNYCNQMMKSRNLTkDRCKPVNTLVHESLADVQAVCSQKNVACKNGOTNCYQSYSTMSITDCRETGSSKYPNCAYKTTQANKHIIVACENFYVPVHFDAS-v<br/> -kESAAAKFERQHMD<b>SGNSASS</b>SNYCNLMCCRKMTQGGCKPVNTFVHESLADVKAVCSQKKVTCKDGOTNCYQSKSTMRIIDCRETGSSKYPNCAYKTTQVEKHIIVACGGKPSVPVHFDASv-</p> <p>BLAST: aliSize=107 (resi) iden=80.65% (100/124) simi=86.29% (107/124)<br/> <b>KE</b>TAAAKFERQHMD<b>SSTAASS</b>SNYCNQMMKSRNLTkDRCKPVNTLVHESLADVQAVCSQKNVACKNGOTNCYQSYSTMSITDCRETGSSKYPNCAYKTTQANKHIIVACENFYVPVHFDASV<br/> <b>KE</b>SAAAKFERQHMD<b>SGNSASS</b>SNYCNLMCCRKMTQGGCKPVNTFVHESLADVKAVCSQKKVTCKDGOTNCYQSKSTMRIIDCRETGSSKYPNCAYKTTQVEKHIIVACGGKPSVPVHFDASV</p> <p>Proposed: aliSize=124 (resi) RMSD=0.86 (Å)<br/> <b>KE</b>TAAAKFERQHMD<b>SSTAASS</b>SNYCNQMMKSRNLTkDRCKPVNTLVHESLADVQAVCSQKNVACKNGOTNCYQSYSTMSITDCRETGSSKYPNCAYKTTQANKHIIVACENFYVPVHFDASV<br/> <b>KE</b>SAAAKFERQHMD<b>SGNSASS</b>SNYCNLMCCRKMTQGGCKPVNTFVHESLADVKAVCSQKKVTCKDGOTNCYQSKSTMRIIDCRETGSSKYPNCAYKTTQVEKHIIVACGGKPSVPVHFDASV</p>       |
| 943 | <p>lizpA (124)</p> <hr/> <p>3bcoA (124)</p> | N | 81.45 | <p>TM-align: aliSize=104 (resi) RMSD=0.86 (Å)<br/> ketaaakferqhmd <b>sst</b>tsaa-----SSSNYCNQMMKSRNLTkDRCKPVNTLVHESLADVQAVCSQKNVACKNGOTNCYQSYSTMSITDCRETGSSKYPNCAYKTTQANKHIIVACENFYVPVHFDASV<br/> -----kesaakferqhmdsgnsasSSSNYCNQMMCCRKMTQGGCKPVNTFVHESLADVKAVCSQKKVTCKDGOTNCYQSKSTMRIIDCRETGSSKYPNCAYKTTQVEKHIIVACGGKPSVPVHFDASV</p> <p>SARST: aliSize=118 (resi) RMSD=9.22 (Å)<br/> k-ETAAAKFERQHMD<b>SSTAASS</b>SNYCNQMMKSRNLTkDRCKPVNTLVHESLADVQAVCSQKNVACKNGOTNCYQSYSTMSITDCRETGSSKYPNCAYKTTQANKHIIVACENFYVPVHFDAS-v<br/> -kESAAAKFERQHMD<b>SGNSASS</b>SNYCNQMMCCRKMTQGGCKPVNTFVHESLADVKAVCSQKKVTCKDGOTNCYQSKSTMRIIDCRETGSSKYPNCAYKTTQVEKHIIVACGGKPSVPVHFDASv-</p> <p>BLAST: aliSize=108 (resi) iden=81.45% (101/124) simi=87.10% (108/124)<br/> <b>KE</b>TAAAKFERQHMD<b>SSTAASS</b>SNYCNQMMKSRNLTkDRCKPVNTLVHESLADVQAVCSQKNVACKNGOTNCYQSYSTMSITDCRETGSSKYPNCAYKTTQANKHIIVACENFYVPVHFDASV<br/> <b>KE</b>SAAAKFERQHMD<b>SGNSASS</b>SNYCNQMMCCRKMTQGGCKPVNTFVHESLADVKAVCSQKKVTCKDGOTNCYQSKSTMRIIDCRETGSSKYPNCAYKTTQVEKHIIVACGGKPSVPVHFDASV</p> <p>Proposed: aliSize=124 (resi) RMSD=0.85 (Å)<br/> <b>KE</b>TAAAKFERQHMD<b>SSTAASS</b>SNYCNQMMKSRNLTkDRCKPVNTLVHESLADVQAVCSQKNVACKNGOTNCYQSYSTMSITDCRETGSSKYPNCAYKTTQANKHIIVACENFYVPVHFDASV<br/> <b>KE</b>SAAAKFERQHMD<b>SGNSASS</b>SNYCNQMMCCRKMTQGGCKPVNTFVHESLADVKAVCSQKKVTCKDGOTNCYQSKSTMRIIDCRETGSSKYPNCAYKTTQVEKHIIVACGGKPSVPVHFDASV</p> |
| 944 | <p>lizpA (124)</p> <hr/> <p>ly94A (124)</p> | N | 83.06 | <p>TM-align: aliSize=104 (resi) RMSD=0.98 (Å)<br/> ketaaakferqhmd <b>sst</b>tsaa-----SSSNYCNQMMKSRNLTkDRCKPVNTLVHESLADVQAVCSQKNVACKNGOTNCYQSYSTMSITDCRETGSSKYPNCAYKTTQANKHIIVACENFYVPVHFDASV<br/> -----kesaakferqhmdssttsaaSSSNYCNLMCCRKMTQGGCKPVNTFVHESLADVKAVCSQKKVTCKDGOTNCYQSKSTMRIIDCRETGSSKYPNCAYKTTQVEKHIIVACGGKPSVPVHFDASV</p> <p>SARST: aliSize=118 (resi) RMSD=9.26 (Å)<br/> k-ETAAAKFERQHMD<b>SSTAASS</b>SNYCNQMMKSRNLTkDRCKPVNTLVHESLADVQAVCSQKNVACKNGOTNCYQSYSTMSITDCRETGSSKYPNCAYKTTQANKHIIVACENFYVPVHFDAS-v<br/> -kESAAAKFERQHMD<b>SSTAASS</b>SNYCNLMCCRKMTQGGCKPVNTFVHESLADVKAVCSQKKVTCKDGOTNCYQSKSTMRIIDCRETGSSKYPNCAYKTTQVEKHIIVACGGKPSVPVHFDASv-</p> <p>BLAST: aliSize=109 (resi) iden=83.06% (103/124) simi=87.90% (109/124)<br/> <b>KE</b>TAAAKFERQHMD<b>SSTAASS</b>SNYCNQMMKSRNLTkDRCKPVNTLVHESLADVQAVCSQKNVACKNGOTNCYQSYSTMSITDCRETGSSKYPNCAYKTTQANKHIIVACENFYVPVHFDASV<br/> <b>KE</b>SAAAKFERQHMD<b>SSTAASS</b>SNYCNLMCCRKMTQGGCKPVNTFVHESLADVKAVCSQKKVTCKDGOTNCYQSKSTMRIIDCRETGSSKYPNCAYKTTQVEKHIIVACGGKPSVPVHFDASV</p> <p>Proposed: aliSize=124 (resi) RMSD=0.95 (Å)<br/> <b>KE</b>TAAAKFERQHMD<b>SSTAASS</b>SNYCNQMMKSRNLTkDRCKPVNTLVHESLADVQAVCSQKNVACKNGOTNCYQSYSTMSITDCRETGSSKYPNCAYKTTQANKHIIVACENFYVPVHFDASV<br/> <b>KE</b>SAAAKFERQHMD<b>SSTAASS</b>SNYCNLMCCRKMTQGGCKPVNTFVHESLADVKAVCSQKKVTCKDGOTNCYQSKSTMRIIDCRETGSSKYPNCAYKTTQVEKHIIVACGGKPSVPVHFDASV</p>    |

|     |               |   |       |                                                                                                                                                                                                                                                                                                                                                                                                                                                                                                                                                                                                                                                                                                                                                                                                                                                                         |
|-----|---------------|---|-------|-------------------------------------------------------------------------------------------------------------------------------------------------------------------------------------------------------------------------------------------------------------------------------------------------------------------------------------------------------------------------------------------------------------------------------------------------------------------------------------------------------------------------------------------------------------------------------------------------------------------------------------------------------------------------------------------------------------------------------------------------------------------------------------------------------------------------------------------------------------------------|
| 945 | 2v1qB<br>(58) | C | 31.03 | <p><b>TM-align:</b> aliSize=36 (resi) RMSD=2.22 (Å)<br/> -ERGIYQDFMAESQDELTKSGDKVYLD-DKKSdWwmcqlvdsgksg-----lvpaqfiepv-----<br/> kKYAKSKYDFVARNSSSEL SVMKDDVLELDdRRQW-WK-----vrnasgdsgF-----vpnnildimrtp</p> <p><b>SARST:</b> aliSize=52 (resi) RMSD=11.54 (Å)<br/> er---GIVQYDFMAESQDELTKSGDKVYLD-DKKSdWwmcqlvdsgksgSCLVFAQFIEP----v<br/> --kkyAKSKYDFVARNSSSEL SVMKDDVLELDdRRQ--WwKVRN-ASGDSGFVFNILDIImrtp-</p> <p><b>BLAST:</b> aliSize=30 (resi) iden=32.76% (19/58) simi=51.72% (30/58)<br/> ergiv-----QYDFMAESQDELTKSGDKVYLD-DKKSdWwmcqlvdsgksgSCLVFAQFIE-----pv<br/> -----kkyaksKYDFVARNSSSEL SVMKDDVLELDdRR--RQWwKVRN-ASGDSGFVFNILDIImrtp--</p> <p><b>Proposed:</b> aliSize=53 (resi) RMSD=1.12 (Å)<br/> -ERGIYQDFMAESQDELTKSGDKVYLD--dkksKDwmcqlvdsgksgSCLVFAQFIEPV---<br/> kKYAKSKYDFVARNSSSEL SVMKDDVLELDdr---RQWwKVRN-ASGDSGFVFNILDIImrtp</p>               |
|     | li07A<br>(59) |   |       |                                                                                                                                                                                                                                                                                                                                                                                                                                                                                                                                                                                                                                                                                                                                                                                                                                                                         |
| 946 | 1sshA<br>(60) | C | 27.12 | <p><b>TM-align:</b> aliSize=36 (resi) RMSD=2.37 (Å)<br/> gsSPKIVALYSFAGEESGDL PFRKGDVITLk-KSdSqnDwtgrvngreg-----lfpanyvelv-----<br/> --KKYAKSKYDFVARNSSSEL SVMKDDVLELDdRR-Q--Ww-----kvrnasgdsgF-----vpnnildimrtp</p> <p><b>SARST:</b> aliSize=52 (resi) RMSD=10.91 (Å)<br/> gssp--KIVALYSFAGEESGDL PFRKGDVITLkKSDSNDWwTGRV-NREGIFPANYVEL----v<br/> ---kkyAKSKYDFVARNSSSEL SVMKDDVLELDdRRQWwKVRN-ASGDSGFVFNILDIImrtp-</p> <p><b>BLAST:</b> aliSize=27 (resi) iden=30.51% (18/59) simi=45.76% (27/59)<br/> gsspk---IVALYSFAGEESGDL PFRKGDVITLkksDSNDWwTGR--VNGREGIFPANYVELV---<br/> -----kkyAKSKYDFVARNSSSEL SVMKDDVLELDdRRQWwKVRN-ASGDSGFVFNILDIImrtp</p> <p><b>Proposed:</b> aliSize=53 (resi) RMSD=1.41 (Å)<br/> gsSPKIVALYSFAGEESGDL PFRKGDVITLk--ksdsqNDWwTGRVNG-REGIFPANYVELV---<br/> --KKYAKSKYDFVARNSSSEL SVMKDDVLELDdr---RQWwKVRN-ASGDSGFVFNILDIImrtp</p>        |
|     | li07A<br>(59) |   |       |                                                                                                                                                                                                                                                                                                                                                                                                                                                                                                                                                                                                                                                                                                                                                                                                                                                                         |
| 947 | 1h3hA<br>(60) | C | 30.51 | <p><b>TM-align:</b> aliSize=36 (resi) RMSD=2.64 (Å)<br/> grv-RWARALYDFEALLEEDELGFRSGEVVEVLD-SSNpsWwtgrlhnlkg-----lfpanyvapmmr-----<br/> ---kKYAKSKYDFVARNSSSEL SVMKDDVLELDdRRQWwK-----vrnasgdsgF-----vpnnildimrtp</p> <p><b>SARST:</b> aliSize=52 (resi) RMSD=11.14 (Å)<br/> grvr--WARALYDFEALLEEDELGFRSGEVVEVLDSSNpsWwtgrlhnlkgNKLLFPANYVAPM---mr<br/> ---kkyAKSKYDFVARNSSSEL SVMKDDVLELDdRR--QWwKVRN-ASGDSGFVFNILDIImrtp--</p> <p><b>BLAST:</b> aliSize=28 (resi) iden=32.20% (19/59) simi=47.46% (28/59)<br/> grv-RWARALYDFEALLEEDELGFRSGEVVEVLDSSNpsWwtgrlhnlkgNKLLFPANYVAPM---<br/> ---kkyAKSKYDFVARNSSSEL SVMKDDVLELDdRR-QWwKVRN-ASGDSGFVFNILDIImrtp</p> <p><b>Proposed:</b> aliSize=55 (resi) RMSD=1.48 (Å)<br/> grv-RWARALYDFEALLEEDELGFRSGEVVEVLD-SSNpsWwtgrlhnlkgNKLLFPANYVAPM---<br/> ---kkyAKSKYDFVARNSSSEL SVMKDDVLELDdRR--QWwKVRN-ASGDSGFVFNILDIImrtp</p> |
|     | li07A<br>(59) |   |       |                                                                                                                                                                                                                                                                                                                                                                                                                                                                                                                                                                                                                                                                                                                                                                                                                                                                         |

|     |               |   |       |                                                                                                                                                                                                                                                                                                                                                                                                                                                                                                                                                                                                                                                                                                                                                                                                                                                                  |
|-----|---------------|---|-------|------------------------------------------------------------------------------------------------------------------------------------------------------------------------------------------------------------------------------------------------------------------------------------------------------------------------------------------------------------------------------------------------------------------------------------------------------------------------------------------------------------------------------------------------------------------------------------------------------------------------------------------------------------------------------------------------------------------------------------------------------------------------------------------------------------------------------------------------------------------|
| 948 | 2semB<br>(59) | C | 22.03 | <p><b>TM-align:</b> aliSize=37 (resi) RMSD=2.35 (Å)<br/> TIFVQALFDENPQESGELAFKRGDVIITLIN-KDDPNWEGQLNRRGIFPSNYVCPYNSN-----<br/> KYYAKSKYDFVARNSSSELVSMKDDVLEILDdRRQWVK-----vrnasgdsGF-----vpnnildimrtp</p> <p><b>SARST:</b> aliSize=52 (resi) RMSD=11.49 (Å)<br/> tk--FVQALFDENPQESGELAFKRGDVIITLINKDDPNWEGQLN--NRRGIFPSNYVCPY---nsn<br/> --kkYAKSKYDFVARNSSSELVSMKDDVLEILDdRR--QWVKVRNasGDSGFVNNILDIMRtp---</p> <p><b>BLAST:</b> aliSize=28 (resi) iden=23.73% (14/59) simi=47.46% (28/59)<br/> t--FVQALFDENPQESGELAFKRGDVIITLINKDDPNWEGQLNRRGIFPSN-----yvcpynsn<br/> -kYYAKSKYDFVARNSSSELVSMKDDVLEILD-DRRQWVKVRNASGDSGFVNNildimrtp-----</p> <p><b>Proposed:</b> aliSize=56 (resi) RMSD=1.35 (Å)<br/> TIFVQALFDENPQESGELAFKRGDVIITLIN--kddPNWEGQLN--NRRGIFPSNYVCPYNSN<br/> KYYAKSKYDFVARNSSSELVSMKDDVLEILDdrr--RQWVKVRNasGDSGFVNNILDIMRTP</p>                    |
| 949 | 1jo8A<br>(58) | C | 22.41 | <p><b>TM-align:</b> aliSize=35 (resi) RMSD=2.41 (Å)<br/> -PWATAEYDYDAEDNELTFVENKIInIE--FVDDWwIgelekdgskg-----lfpsnyvslgn-----<br/> kYYAKSKYDFVARNSSSELVSMKDDVLEILDdRRQWVK-----vrnasgdsGF-----vpnnildimrtp</p> <p><b>SARST:</b> aliSize=49 (resi) RMSD=11.19 (Å)<br/> p--WATAEYDYDAEDNELTFVENKIInIEFVDDWwLGELEKDGSKGLFPSNYVSL----gn<br/> --kkYAKSKYDFVARNSSSELVSMKDDVLEILDdRRQ-----WVKVRNasGDSGFVNNILDIMRtp--</p> <p><b>BLAST:</b> aliSize=30 (resi) iden=27.59% (16/58) simi=51.72% (30/58)<br/> p--WATAEYDYDAEDNELTFVENKIInIEFVDD--DWLGELEKDGSKGLFPSNYVSL----gn<br/> --kkYAKSKYDFVARNSSSELVSMKDDV--LEILDdrrQWVKVRNasGDSGFVNNILDIMRtp--</p> <p><b>Proposed:</b> aliSize=54 (resi) RMSD=1.41 (Å)<br/> -PWATAEYDYDAEDNELTFVENKIInIE--FVDDWwLGELEKDGSKGLFPSNYVSLGN--<br/> kYYAKSKYDFVARNSSSELVSMKDDVLEILDdrr--RQWVKVRNasGDSGFVNNILDIMRTP</p>                        |
| 950 | 4hckA<br>(61) | N | 27.12 | <p><b>TM-align:</b> aliSize=36 (resi) RMSD=2.58 (Å)<br/> seDIIVVALYDYEAIHHEDLSFQGGQMVVIE--ESGEWwKarslatrkeg-----Yipsnyvarvds-----<br/> --KYYAKSKYDFVARNSSSELVSMKDDVLEILDdRRQWVK-----vrnasgdsGF-----vpnnildimrtp</p> <p><b>SARST:</b> aliSize=54 (resi) RMSD=12.28 (Å)<br/> sedi--IIVALYDYEAIHHEDLSFQGGQMVVIEESGEWwKARSlatrkegyiPSNYVARV---ds<br/> ----kkYAKSKYDFVARNSSSELVSMKDDVLEILDdRRQWVKVRNasGDSGFVNNILDIMRtp--</p> <p><b>BLAST:</b> aliSize=29 (resi) iden=27.12% (16/59) simi=49.15% (29/59)<br/> sediivval-----YDYEAIHHEDLSFQGGQMVVIEESGEWwKARSlatrkegyiPSN-----yvarvds<br/> -----kkyakskYDFVARNSSSELVSMKDDVLEILDdRRQWVKVRNasGDSGFVNNildimrtp-----</p> <p><b>Proposed:</b> aliSize=57 (resi) RMSD=1.52 (Å)<br/> seDIIVVALYDYEAIHHEDLSFQGGQMVVIE--ESGEWwKARSlatrkegyiPSNYVARVDS--<br/> --KYYAKSKYDFVARNSSSELVSMKDDVLEILDdRR--QWVKVRNasGDSGFVNNILDIMRTP</p> |

|     |                                               |   |       |                                                                                                                                                                                                                                                                                                                                                                                                                                                                                                                                                                                                                                                                                                                                                                                                                                                                                                                                                                                                                                                                                                                                                                                                                                                                                                                                                                                                                                                                                                                                                                                                                                                                                                   |
|-----|-----------------------------------------------|---|-------|---------------------------------------------------------------------------------------------------------------------------------------------------------------------------------------------------------------------------------------------------------------------------------------------------------------------------------------------------------------------------------------------------------------------------------------------------------------------------------------------------------------------------------------------------------------------------------------------------------------------------------------------------------------------------------------------------------------------------------------------------------------------------------------------------------------------------------------------------------------------------------------------------------------------------------------------------------------------------------------------------------------------------------------------------------------------------------------------------------------------------------------------------------------------------------------------------------------------------------------------------------------------------------------------------------------------------------------------------------------------------------------------------------------------------------------------------------------------------------------------------------------------------------------------------------------------------------------------------------------------------------------------------------------------------------------------------|
| 951 | <p>1m7A<br/>(112)</p> <p>1r4cA<br/>(110)</p>  | N | 52.73 | <p><b>TM-align:</b> aliSize=64 (resi) RMSD=1.20 (Å)<br/> aggihatdlnksvqraldfaiseynkvinkdeyysrplqvmaayqqi-----VGGVNYFNFKFGRTTCTKSQPNDNCPFDOPKLEEEFCFSQINEVPWEDKISILNYKIRKV<br/> -----ggpmdasveeegvrraldfavgeynkasndmyhsralqvvrarkqiVAGVNYFLDVELGRTTCTKTQPNLDNCPFDOPHLKRKAFCSFOIYAVPWQGTMTLSKSTQDA</p> <p><b>SARST:</b> aliSize=108 (resi) RMSD=19.10 (Å)<br/> agg--IHATDLNDKSVQRALDFAISEYNKVIINKDEYSRPLOVMAAYQQIVGGVNYFNFKFGRTTCTKSQPNDNCPFDOPKLEEEFCFSQINEVPWEDKISILNYKIRKV<br/> ---ggPMDASVEEEGVRRALDFAVGEYNKA-SNDMHSRALQVVRARKQIVAGVNYFLDVELGRTTCTKTQPNLDNCPFDOPHLKRKAFCSFOIYAVPWQGTMTLSKSTQDA</p> <p><b>BLAST:</b> aliSize=80 (resi) iden=55.45% (61/110) simi=72.73% (80/110)<br/> aGCIHATDLNDKSVQRALDFAISEYNKVIINKDEYSRPLOVMAAYQQIVGGVNYFNFKFGRTTCTKSQPNDNCPFDOPKLEEEFCFSQINEVPWEDKISILNYKIRKV--kv<br/> -GGPMDASVEEEGVRRALDFAVGEYNKASNDMHSRALQVVRARKQIVAGVNYFLDVELGRTTCTKTQPNLDNCPFDOPHLKRKAFCSFOIYAVPWQGTMTLSKSTQda--</p> <p><b>Proposed:</b> aliSize=109 (resi) RMSD=0.92 (Å)<br/> aGCIHATDLNDKSVQRALDFAISEYNKVIINKDEYSRPLOVMAAYQQIVGGVNYFNFKFGRTTCTKSQPNDNCPFDOPKLEEEFCFSQINEVPWEDKISILNYKIRKV<br/> -GGPMDASVEEEGVRRALDFAVGEYNKA-SNDMHSRALQVVRARKQIVAGVNYFLDVELGRTTCTKTQPNLDNCPFDOPHLKRKAFCSFOIYAVPWQGTMTLSKSTQDA</p>                                                                                                                                                                                                                                                                                                                                                                                                                                                                     |
| 952 | <p>1yvbI<br/>(111)</p> <p>1r4cA<br/>(110)</p> | C | 44.55 | <p><b>TM-align:</b> aliSize=62 (resi) RMSD=1.82 (Å)<br/> rllgapvpvdendeglqralqfamaeynrasndkyssrvrvvisakrql-----VSGIKYILQVEIGRTTCTKSSGDLQSCFEHDEPEMAKYTTCTVWYSIPWLNQIKLESKCQ--<br/> -----ggpmdasveeegvrraldfavgeynkasndmyhsralqvvrarkqiVAGVNYFLDVELGRTTCTKTQPNLDNCPFDOPHLKRKAFCSFOIYAVPWQGTMTLSKSTQDA</p> <p><b>SARST:</b> aliSize=101 (resi) RMSD=20.09 (Å)<br/> rllga--FVPVDENDEGLQRALQFAMAENRASNDKISSRVVRISSAKROLVSGIKYILQVEIGRTTCTP---KSSGDLQSCFEHDEPEMAK-YTTCTVWYSIPWLNQIKLESKCQ---q<br/> ----ggPMDASVEEEGVRRALDFAVGEYNKASNDMHSRALQVVRARKQIVAGVNYFLDVELGRTTCTKTQPNLDNCPFDOPHLKRKAFCSFOIYAVPWQGTMTLSKSTQda-</p> <p><b>BLAST:</b> aliSize=76 (resi) iden=44.55% (49/110) simi=69.09% (76/110)<br/> rllGAFPVDENDEGLQRALQFAMAENRASNDKISSRVVRISSAKROLVSGIKYILQVEIGRTTCTPSSGDLQSCFEHDEPEMAKYTTCTVWYSIPWLNQIKLESKCQ--<br/> ---GGPMDASVEEEGVRRALDFAVGEYNKASNDMHSRALQVVRARKQIVAGVNYFLDVELGRTTCTKTQPNLDNCPFDOPHLKRKAFCSFOIYAVPWQGTMTLSKSTQda</p> <p><b>Proposed:</b> aliSize=108 (resi) RMSD=1.24 (Å)<br/> rllGAFPVDENDEGLQRALQFAMAENRASNDKISSRVVRISSAKROLVSGIKYILQVEIGRTTCTPSSGDLQSCFEHDEPEMAKYTTCTVWYSIPWLNQIKLESKCQ--<br/> ---GGPMDASVEEEGVRRALDFAVGEYNKASNDMHSRALQVVRARKQIVAGVNYFLDVELGRTTCTKTQPNLDNCPFDOPHLKRKAFCSFOIYAVPWQGTMTLSKSTQda</p>                                                                                                                                                                                                                                                                                                                                                                                                                                                        |
| 953 | <p>1yupE<br/>(154)</p> <p>1g85A<br/>(159)</p> | C | 16.23 | <p><b>TM-align:</b> aliSize=120 (resi) RMSD=2.79 (Å)<br/> -----D-LDVQKVAQTWYSLAMAASDI SLLDqSAPLRVYVEELKPT-PTPGDLEILLQKWENKCAQKKIIEKTEIPAVFKIDALNENKVLVLDTDYKKYLLFCMENSA-EPEQSLACQCLVRTPEVDdeamekfdkalkalpmhirlsfntqle-----EQCRV<br/> aqeeeAeQNLSELSPPVRTVYIGSTNPEKIQE-NGFFRTYFRELVFDDekITVDFYFVSKRDGKWKNVHVKATKQDDG-TYVAYEGQVFKIVSLSR-THLVAHNIIVDKHGQTTTELTGLFVKLN-----vededlekwkltedkgiddknvvnflenenHPHPE</p> <p><b>SARST:</b> aliSize=135 (resi) RMSD=13.52 (Å)<br/> d-----LDVQKVAQTWYSLAMAASDI SLLDqSAPLRVYVEELKPT-PTPGDLEILLQKWENKCAQKKIIEKTEIPAVFKIDALNENKVLVLDTDYKKYLLFCMENSA-EPEQSL--ACQCLVRTPEVDDEAMEKFDKALKALPM---HTRL-----sfntqleeqcrv<br/> -aqeeaeQNLSELSPPVRTVYIGSTNPEKIQE-NGFFRTYFRELVFDDekITVDFYFVSKRDGKWKNVHVKATKQDDG-DGTVAYEGQVFKIVSLSR-THLVAHNIIVDKHGQTTTELTGLFVKLNVEDEDLEKFWLLETEDKGI dkkNVVnflenenhphpe-----</p> <p><b>BLAST:</b> aliSize=55 (resi) iden=16.23% (25/154) simi=35.71% (55/154)<br/> d1-----DVQKVAQTWYSLAMAASDI SLLDqSAPLRVYVEELKPT-PTPGDLEILLQKWENKCAQKKIIEKTEIPAVFKIDALNENKVLVLDTDYKKYLLFCMENSAEPEQSLACQCLVRTPEVDDEAMEKFDK-----alkalpmhirlsfntqleeqcrv<br/> --aqeeaeQNLSELSPPVRTVYIGSTNPEKIQE-NGFFRTYFRELVFDDekITVDFYFVSKRDGKWKNVHVKATKQDDG-DGTVAYEGQVFKIVSLSR-THLVAHNIIVDKHGQTTTELTGLFVKLNVEDEDLEKFWLLETEDKGI dkkNVVnflenenhphpe-----</p> <p><b>Proposed:</b> aliSize=140 (resi) RMSD=1.94 (Å)<br/> -----D-LDVQKVAQTWYSLAMAASDI SLLDqSAPLRVYVEELKPT-PTPGDLEILLQKWENKCAQKKIIEKTEIPAVFKIDALNENKVLVLDTDYKKYLLFCMENSAEPEQSLACQCLVRTPEVDDEAMEKFDKALKALPMH--IRLSNptQ---leeqCR---v<br/> aqeeeAeQNLSELSPPVRTVYIGSTNPEKIQE-NGFFRTYFRELVFDDekITVDFYFVSKRDGKWKNVHVKATKQDDG-TYVAYEGQVFKIVSLSR-THLVAHNIIVDKHGQTTTELTGLFVKLNVEDEDLEKFWLLETEDKGI dkkNVVnflenenhphpe-----</p> |

|     |                                                                   |   |       |                                                                                                                                                                                                                                                                                                                                                                                                                                                                                                                                                                                                                                                                                                                                                                                                                                                                                                                                                                                                                                                                                                                                                                                                                                                                                                                                                                                                                                                                                                                                                                                                                                                                                                |
|-----|-------------------------------------------------------------------|---|-------|------------------------------------------------------------------------------------------------------------------------------------------------------------------------------------------------------------------------------------------------------------------------------------------------------------------------------------------------------------------------------------------------------------------------------------------------------------------------------------------------------------------------------------------------------------------------------------------------------------------------------------------------------------------------------------------------------------------------------------------------------------------------------------------------------------------------------------------------------------------------------------------------------------------------------------------------------------------------------------------------------------------------------------------------------------------------------------------------------------------------------------------------------------------------------------------------------------------------------------------------------------------------------------------------------------------------------------------------------------------------------------------------------------------------------------------------------------------------------------------------------------------------------------------------------------------------------------------------------------------------------------------------------------------------------------------------|
| 954 | <p><b>1yupE</b><br/>(154)</p> <hr/> <p><b>1pboB</b><br/>(151)</p> | C | 16.56 | <p><b>TM-align:</b> aliSize=118 (resi) RMSD=2.77 (Å)<br/> d1DVQKVACTIYSLAMAASDI SLDDaQSAPLRVYVEELKPT-PGDDLEILLQKWENKCAQKKIIEKTEIPaVFKI DALNEKVLVLDTDyKkYLFCMENSaEPEQSLACQCLVRTPEVddeamekfdkalkalpmhirlsfnptqle-----EQCRV<br/> --NLSELSCPVRTVYIGSTNPEKIQE-NGPFRTYFREL VFDdEKITVDFYFSVKRDGKWKNVHVKATKODDG-TYVAIYEGQVFKIVSLS-RTHLVAHNI VDKHGQKTELTELFVKNL-----vededlekwkltedkgidkknvvnflenedHPHPE</p> <p><b>SARST:</b> aliSize=132 (resi) RMSD=13.63 (Å)<br/> d1dv--OKVACTIYSLAMAASDI SLDDaQSAPLRVYVEELKPT-PGDDLEILLQKWENKCAQKKIIEKTEIPaVFKI DALNEKVLVLDTDyKkYLFCMENSaEPEQSL--ACQCLVRTPEVDDEAMEKFDKALKALPM---HTRL-----sfnptqleeqcrv<br/> ---n1SELSCPVRTVYIGSTNPEKIQE-NGPFRTYFREL VFDdEKITVDFYFSVKRDGKWKNVHVKATKOD-DGTYVAIYEGQVFKIVSL-SRTHLVAHNI--VDKHGQKtELTGIFVKNLVEDEDLEKFWLTDKGI dkkNVNflenedhphe-----</p> <p><b>BLAST:</b> aliSize=54 (resi) iden=16.56% (25/151) simi=35.76% (54/151)<br/> d1DVQKVACTIYSLAMAASDI SLDDaQSAPLRVYVEELKPT-PGDDLEILLQKWENKCAQKKIIEKTEIPaVFKI DALNEKVLVLDTDyKkYLFCMENSaEPEQSLACQCLVRTPEVDDEAMEKFDK-----alkalpmhirlsfnptqleeqcrv<br/> --NLSELSCPVRTVYIGSTNPEKIQE-ENGPFRTYFREL VFDdEKITVDFYFSVKRDGKWKNVHVKATKOD-DGTYVAIYEGQVFKIVSLS-RTHLVAHNI VDKHGQKTELTELFVKNLVEDEDLEKFWLtedkgidkknvvnflenedhphe-----</p> <p><b>Proposed:</b> aliSize=138 (resi) RMSD=1.89 (Å)<br/> d1DVQKVACTIYSLAMAASDI SLDDaQSAPLRVYVEELKPT-PGDDLEILLQKWENKCAQKKIIEKTEIPaVFKI DALNEKVLVLDTDyKkYLFCMENSa----EpeQSLACQCLVRTPEVDDEAMEKFDKALKALPMH--IRLSNptQ---leeqCR---v<br/> --NLSELSCPVRTVYIGSTNPEKIQE-NGPFRTYFREL VFDdEKITVDFYFSVKRDGKWKNVHVKATKODDG-TYVAIYEGQVFKIVSLSR-THLVAHNI--VdkhgQ--KTELTELFVKNLVEDEDLEKFWLTDKGI dkkNVNflened---HPhpe-</p>                                                |
| 955 | <p><b>1yupE</b><br/>(154)</p> <hr/> <p><b>1gt3A</b><br/>(159)</p> | C | 16.23 | <p><b>TM-align:</b> aliSize=120 (resi) RMSD=2.78 (Å)<br/> -----D-LDVQKVACTIYSLAMAASDI SLDDaQSAPLRVYVEELKPT-PGDDLEILLQKWENKCAQKKIIEKTEIPaVFKI DALNEKVLVLDTDyKkYLFCMENSaEPEQSLACQCLVRTPEVddeamekfdkalkalpmhirlsfnptqle-----EQCRV<br/> aqeeAeQNLSELSCPVRTVYIGSTNPEKIQE-NGPFRTYFREL VFDdEKITVDFYFSVKRDGKWKNVHVKATKODDG-TYVAIYEGQVFKIVSLSR-THLVAHNI VDKHGQKTELTELFVKNL-----vededlekwkltedkgidkknvvnflenenHPHPE</p> <p><b>SARST:</b> aliSize=132 (resi) RMSD=13.66 (Å)<br/> d-----LDVQKVACTIYSLAMAASDI SLDDaQSAPLRVYVEELKPT-PGDDLEILLQKWENKCAQKKIIEKTEIPaVFKI DALNEKVLVLDTDyKkYLFCMENSaEPEQSL--ACQCLVRTPEVDDEAMEKFDKALKALPM---HTRL-----sfnptqleeqcrv<br/> -aqeeAeQNLSELSCPVRTVYIGSTNPEKIQE---QENGpfrTYFREL VFDdEKITVDFYFSVKRDGKWKNVHVKATKOD-DGTYVAIYEGQVFKIVSL-SRTHLVAHNI--VDKHGQKtELTELFVKNLVEDEDLEKFWLTDKGI dkkNVNflenenhphe-----</p> <p><b>BLAST:</b> aliSize=55 (resi) iden=16.23% (25/154) simi=35.71% (55/154)<br/> d1-----LDVQKVACTIYSLAMAASDI SLDDaQSAPLRVYVEELKPT-PGDDLEILLQKWENKCAQKKIIEKTEIPaVFKI DALNEKVLVLDTDyKkYLFCMENSaEPEQSLACQCLVRTPEVDDEAMEKFDK-----alkalpmhirlsfnptqleeqcrv<br/> --aqeeAeQNLSELSCPVRTVYIGSTNPEKIQE-ENGPFRTYFREL VFDdEKITVDFYFSVKRDGKWKNVHVKATKOD-DGTYVAIYEGQVFKIVSLS-RTHLVAHNI VDKHGQKTELTELFVKNLVEDEDLEKFWLtedkgidkknvvnflenenhphe-----</p> <p><b>Proposed:</b> aliSize=140 (resi) RMSD=1.94 (Å)<br/> -----D-LDVQKVACTIYSLAMAASDI SLDDaQSAPLRVYVEELKPT-PGDDLEILLQKWENKCAQKKIIEKTEIPaVFKI DALNEKVLVLDTDyKkYLFCMENSa----EpeQSLACQCLVRTPEVDDEAMEKFDKALKALPMH--IRLSNptQ---leeqCR---v<br/> aqeeAeQNLSELSCPVRTVYIGSTNPEKIQE-NGPFRTYFREL VFDdEKITVDFYFSVKRDGKWKNVHVKATKODDG-TYVAIYEGQVFKIVSLSR-THLVAHNI--VdkhgQ--TTELTELFVKNLVEDEDLEKFWLTDKGI dkkNVNflened---HPhpe-</p> |
| 956 | <p><b>1yupE</b><br/>(154)</p> <hr/> <p><b>1gt1A</b><br/>(158)</p> | C | 16.23 | <p><b>TM-align:</b> aliSize=120 (resi) RMSD=2.80 (Å)<br/> -----D-LDVQKVACTIYSLAMAASDI SLDDaQSAPLRVYVEELKPT-PGDDLEILLQKWENKCAQKKIIEKTEIPaVFKI DALNEKVLVLDTDyKkYLFCMENSaEPEQSLACQCLVRTPEVddeamekfdkalkalpmhirlsfnptqle-----EQCRV<br/> qeeAeQNLSELSCPVRTVYIGSTNPEKIQE-NGPFRTYFREL VFDdEKITVDFYFSVKRDGKWKNVHVKATKODDG-TYVAIYEGQVFKIVSLSR-THLVAHNI VDKHGQKTELTELFVKNL-----vededlekwkltedkgidkknvvnflenenHPHPE</p> <p><b>SARST:</b> aliSize=132 (resi) RMSD=14.12 (Å)<br/> d-----LDVQKVACTIYSLAMAASDI SLDDaQSAPLRVYVEELKPT-PGDDLEILLQKWENKCAQKKIIEKTEIPaVFKI DALNEKVLVLDTDyKkYLFCMENSaEPEQSLACQCLVRTPEVD--DEAMEKFDKALKALPM---HTRL-----sfnptqleeqcrv<br/> -qeeAeQNLSELSCPVRTVYIGSTNPEKIQE---QENGpfrTYFREL VFDdEKITVDFYFSVKRDGKWKNVHVKATKOD-DGTYVAIYEGQVFKIVSL-SRTHLVAHNI--VDKHGQKTELTELFVKNLVEDEDLEKFWLTDKGI dkkNVNflenenhphe-----</p> <p><b>BLAST:</b> aliSize=55 (resi) iden=16.23% (25/154) simi=35.71% (55/154)<br/> d1-----LDVQKVACTIYSLAMAASDI SLDDaQSAPLRVYVEELKPT-PGDDLEILLQKWENKCAQKKIIEKTEIPaVFKI DALNEKVLVLDTDyKkYLFCMENSaEPEQSLACQCLVRTPEVDDEAMEKFDK-----alkalpmhirlsfnptqleeqcrv<br/> --qeeAeQNLSELSCPVRTVYIGSTNPEKIQE-ENGPFRTYFREL VFDdEKITVDFYFSVKRDGKWKNVHVKATKOD-DGTYVAIYEGQVFKIVSLS-RTHLVAHNI VDKHGQKTELTELFVKNLVEDEDLEKFWLtedkgidkknvvnflenenhphe-----</p> <p><b>Proposed:</b> aliSize=141 (resi) RMSD=2.03 (Å)<br/> -----D-LDVQKVACTIYSLAMAASDI SLDDaQSAPLRVYVEELKPT-PGDDLEILLQKWENKCAQKKIIEKTEIPaVFKI DALNEKVLVLDTDyKkYLFCMENSa----EpeQSLACQCLVRTPEVDDEAMEKFDKALKALPMH--IRLSNptQ---leeqCRV----<br/> qeeAeQNLSELSCPVRTVYIGSTNPEKIQE-NGPFRTYFREL VFDdEKITVDFYFSVKRDGKWKNVHVKATKODDG-TYVAIYEGQVFKIVSLSR-THLVAHNI--VdkhgQ--TTELTELFVKNLVEDEDLEKFWLTDKGI dkkNVNflened---NHphpe-</p>   |

|     |                |   |      |                                                                                                                                                                                                                                                                                                                                                                                                                                                                                                                                                                                                                                                                                                                                                                                                                                                                                                                                                                                                                                                                                                                                                                                                                                                                                                                                                                                                                                                                                                                                                                                                                                                                                                                                                                                                                                           |
|-----|----------------|---|------|-------------------------------------------------------------------------------------------------------------------------------------------------------------------------------------------------------------------------------------------------------------------------------------------------------------------------------------------------------------------------------------------------------------------------------------------------------------------------------------------------------------------------------------------------------------------------------------------------------------------------------------------------------------------------------------------------------------------------------------------------------------------------------------------------------------------------------------------------------------------------------------------------------------------------------------------------------------------------------------------------------------------------------------------------------------------------------------------------------------------------------------------------------------------------------------------------------------------------------------------------------------------------------------------------------------------------------------------------------------------------------------------------------------------------------------------------------------------------------------------------------------------------------------------------------------------------------------------------------------------------------------------------------------------------------------------------------------------------------------------------------------------------------------------------------------------------------------------|
| 957 | 1qwdA<br>(167) | C | 8.18 | <p>TM-align: aliSize=107 (resi) RMSD=3.64 (Å)<br/>hlestsl--Ykksstpprgvtvv--NFDKRYLITWYEIARFD--H-RFERGL---EKVTATYSLRDDG-GLNVINKGyNPdRgMWOOSEGKAYFTGAptRaALKVSFFgpfYGGYNVIA DreYRHALVCGPD-----RDYLWILSRtptIsdevkaemlavatregfdvskfiwv-----<br/>-----aqE-----eeAEQNLSELSIPRTVYIGStnPeKIQENgpfrTYFRELVDDEKgtVDFYFSV-KRIG-KKNVHVKA TKQDD--G-TYVADYE--GQNVFKIVSLS--RTLVAHNINvdkhgqtTELTLFVKL-----nvededlekw</p> <p>-----Opg-<br/>wkltedkgidkknvvnflenhpHP--e</p> <p>SARST: aliSize=140 (resi) RMSD=14.48 (Å)<br/>hlestslYkksstppr--GVTVnnFDKRYLITWYEIARFD--DHRFERGLEKVA--TYSLR--DGLNVINKGYNpdRgMWOOSEGKAYFTgAPTRAALKVSFFgpfYGGYNVIA DREYRHALVCGPDRD---YIWIISRTPTISDEVKOEMLAVATREFFVSKFIWV---OOE---g<br/>-----aqEEEAE--QNLSELSIPRTVYIGStnPEKIQENGPFRYfrELVDDEKTVDFYFSVSR--DKKNVHVKA TK--QDDGTIVADYE---GQNVFKIVSLS--THLVAHNINVDKHgqtELTEFVKLNVEDDLEKFWKLTEDKGIKKNVNFlenenhphe-</p> <p>BLAST: aliSize=24 (resi) iden=9.43% (15/159) simi=15.09% (24/159)<br/>hlestslYkksstpprgvtvnnfdakrylgtwyeiarfdhrferglekvtatyslrddgglvinkgynpdrgmqwqsegkayftgapt raal-----VSFFGPFYGGYNVIALDREYRHALVCGPDRDYLWILSRtptIsDEVKOEMLAVATREFFVSKFIWV<br/>-----aqeeaeqnlseisgpwrtvyigstnpeKIQENGPFRTYFRELVDDEKgtVDFYFSVSR--DKKNVHVKA TKQDD---G-TYVADYE--GQNVFKIVSLS--RTLVAHNINvdkhgqtTELTLFVKLNVEDDLEKFWKLTEDKGIKKNVNF</p> <p>-----wvqqpg<br/>slsrthlvahninvdkhgqteltglfvklnvededlekwkltedkgidkknvvnflenhphe-----</p> <p>Proposed: aliSize=123 (resi) RMSD=2.34 (Å)<br/>hlestslYkksstpprgvtvv--NFDKRYLITWYEIARFD--D-H---RFEgLeKVTATYS-L--rdDGLNVINKGyN--pdRgMWOOSEGKAYFTG-aptRaALKVSFFgpfYGGYNVIA DreYRHALVCGP-----DrDYLWILSRtptIsDEVKOEMLAVATREFFVSKFIWV<br/>-----aqeeAEQNLSELSIPRTVYIGStnPeKIQENGPFR--T--YFRELVDde--KTVDFYFSV-Krd--G-KKNVHVKA TKQDD---G-TYVADYE--GQNVFKIVSLS--RTLVAHNINvdkhgqtTELTLFVKLNVEDDLEKFWKLTEDKGIKKNVNF</p> <p>Q-----qpg<br/>Lenenhphe---</p> |
|     | 1g85A<br>(159) |   |      | <p>-----wvqqpg<br/>slsrthlvahninvdkhgqteltglfvklnvededlekwkltedkgidkknvvnflenhphe-----</p> <p>Proposed: aliSize=123 (resi) RMSD=2.34 (Å)<br/>hlestslYkksstpprgvtvv--NFDKRYLITWYEIARFD--D-H---RFEgLeKVTATYS-L--rdDGLNVINKGyN--pdRgMWOOSEGKAYFTG-aptRaALKVSFFgpfYGGYNVIA DreYRHALVCGP-----DrDYLWILSRtptIsDEVKOEMLAVATREFFVSKFIWV<br/>-----aqeeAEQNLSELSIPRTVYIGStnPeKIQENGPFR--T--YFRELVDde--KTVDFYFSV-Krd--G-KKNVHVKA TKQDD---G-TYVADYE--GQNVFKIVSLS--RTLVAHNINvdkhgqtTELTLFVKLNVEDDLEKFWKLTEDKGIKKNVNF</p> <p>Q-----qpg<br/>Lenenhphe---</p>                                                                                                                                                                                                                                                                                                                                                                                                                                                                                                                                                                                                                                                                                                                                                                                                                                                                                                                                                                                                                                                                                                                                                                                                                                                                                              |
| 958 | 1qwdA<br>(167) | C | 8.18 | <p>TM-align: aliSize=107 (resi) RMSD=3.63 (Å)<br/>hlestsl--Ykksstpprgvtvv--NFDKRYLITWYEIARFD--H-RFERGL---EKVTATYSLRDDG-GLNVINKGyNPdRgMWOOSEGKAYFTGAptRaALKVSFFgpfYGGYNVIA DreYRHALVCGPD-----RDYLWILSRtptIsdevkaemlavatregfdvskfiwv-----<br/>-----aqE-----eeAEQNLSELSIPRTVYIGStnPeKIQENgpfrTYFRELVDDEKgtVDFYFSV-KRIG-KKNVHVKA TKQDD--G-TYVADYE--GQNVFKIVSLS--RTLVAHNINvdkhgqtTELTLFVKL-----nvededlekw</p> <p>-----Opg-<br/>wkltedkgidkknvvnflenhpHP--e</p> <p>SARST: aliSize=140 (resi) RMSD=14.31 (Å)<br/>hlestslYkksstppr--GVTVnnFDKRYLITWYEIARFD--DHRFERGLEKVA--TYSLR--DGLNVINKGYNpdRgMWOOSEGKAYFTgAPTRAALKVSFFgpfYGGYNVIA DREYRHALVCGPDRD---YIWIISRTPTISDEVKOEMLAVATREFFVSKFIWV---OOE---g<br/>-----aqEEEAE--QNLSELSIPRTVYIGStnPEKIQENGPFRYfrELVDDEKTVDFYFSVSR--DKKNVHVKA TK--QDDGTIVADYE---GQNVFKIVSLS--THLVAHNINVDKHgqtELTEFVKLNVEDDLEKFWKLTEDKGIKKNVNFlenenhphe-</p> <p>BLAST: aliSize=30 (resi) iden=9.43% (15/159) simi=18.87% (30/159)<br/>hl-----STSLYKKSSTppGVTVnnFDKRYLITWYEIARFDHRFERGLEKVTATYSLRDDGGL---NIN-----kgynpdrgmqwqsegkayftgapt ra<br/>--aqeeaeqnlseisgpwrtvyigstnpekiqengpfrtyfrELVDDEKgtVDFYFSVrdgkwnvhvkatkqddgtvadyGQNVFKIVSLS--RTHLVAHNINVDKH--QTTTELTLFVKLNVEDDLEKFWKLTEDKGIKKNVNFlenenhphe-----</p> <p>alkvsffgpfyggynvialdreyrhalvcgpdrylwlisrtpptIsdevkqemlavatregfdvskfiwvqqpg</p> <p>Proposed: aliSize=123 (resi) RMSD=2.33 (Å)<br/>hlestslYkksstpprgvtvv--NFDKRYLITWYEIARFD--D-H---RFEgLeKVTATYS-L--rdDGLNVINKGyN--pdRgMWOOSEGKAYFTG-aptRaALKVSFFgpfYGGYNVIA DreYRHALVCGP-----DrDYLWILSRtptIsDEVKOEMLAVATREFFVSKFIWV<br/>-----aqeeAEQNLSELSIPRTVYIGStnPeKIQENGPFR--T--YFRELVDde--KTVDFYFSV-Krd--G-KKNVHVKA TKQDD---G-TYVADYE--GQNVFKIVSLS--RTLVAHNINvdkhgqtTELTLFVKLNVEDDLEKFWKLTEDKGIKKNVNF</p> <p>Q-----qpg<br/>Lenenhphe---</p>                                                                      |
|     | 1gt3A<br>(159) |   |      | <p>hl-----STSLYKKSSTppGVTVnnFDKRYLITWYEIARFDHRFERGLEKVTATYSLRDDGGL---NIN-----kgynpdrgmqwqsegkayftgapt ra<br/>--aqeeaeqnlseisgpwrtvyigstnpekiqengpfrtyfrELVDDEKgtVDFYFSVrdgkwnvhvkatkqddgtvadyGQNVFKIVSLS--RTHLVAHNINVDKH--QTTTELTLFVKLNVEDDLEKFWKLTEDKGIKKNVNFlenenhphe-----</p> <p>alkvsffgpfyggynvialdreyrhalvcgpdrylwlisrtpptIsdevkqemlavatregfdvskfiwvqqpg</p> <p>Proposed: aliSize=123 (resi) RMSD=2.33 (Å)<br/>hlestslYkksstpprgvtvv--NFDKRYLITWYEIARFD--D-H---RFEgLeKVTATYS-L--rdDGLNVINKGyN--pdRgMWOOSEGKAYFTG-aptRaALKVSFFgpfYGGYNVIA DreYRHALVCGP-----DrDYLWILSRtptIsDEVKOEMLAVATREFFVSKFIWV<br/>-----aqeeAEQNLSELSIPRTVYIGStnPeKIQENGPFR--T--YFRELVDde--KTVDFYFSV-Krd--G-KKNVHVKA TKQDD---G-TYVADYE--GQNVFKIVSLS--RTLVAHNINvdkhgqtTELTLFVKLNVEDDLEKFWKLTEDKGIKKNVNF</p> <p>Q-----qpg<br/>Lenenhphe---</p>                                                                                                                                                                                                                                                                                                                                                                                                                                                                                                                                                                                                                                                                                                                                                                                                                                                                                                                                                                                                                      |
| 959 | 1qwdA<br>(167) | C | 8.23 | <p>TM-align: aliSize=107 (resi) RMSD=3.64 (Å)<br/>hlestsl--Ykksstpprgvtvv--NFDKRYLITWYEIARFD--H-RFERGL---EKVTATYSLRDDG-GLNVINKGyNPdRgMWOOSEGKAYFTGAptRaALKVSFFgpfYGGYNVIA DreYRHALVCGPD-----RDYLWILSRtptIsdevkaemlavatregfdvskfiwv-----<br/>-----qE-----eeAEQNLSELSIPRTVYIGStnPeKIQENgpfrTYFRELVDDEKgtVDFYFSV-KRIG-KKNVHVKA TKQDD--G-TYVADYE--GQNVFKIVSLS--RTLVAHNINvdkhgqtTELTLFVKL-----nvededlekw</p> <p>-----Opg-<br/>kltedkgidkknvvnflenhpHP--e</p> <p>SARST: aliSize=133 (resi) RMSD=16.39 (Å)<br/>hlestslYkksstppr--GVTVnnFDKRYLITWYEIARFD--DHRFERGLEKVA--TYSLR--DGLNVINKGYNpdRgMWOOSEGKAYFT-----GAPTRAALKVSFFGPFYGGYNVIALDREYRHALVCGPDRDYLWILSRtptIsDEVKOEMLAVATREFFVSKFIWV-----vqqpg<br/>-----qEEEAE--QNLSELSIPRTVYIGStnPEKIQENGPFRYfrELVDDEKTVDFYFSVSR--DKKNVHVKA TKQDDgtvadyEGQNVFKIVSLSRTHLVAHNINVDKHGQTTELTE---LFVKL---NVEDDLEKFWKLTEDKGIKKNVNFlenenhphe-----</p> <p>BLAST: aliSize=30 (resi) iden=9.49% (15/158) simi=18.99% (30/158)<br/>hl-----STSLYKKSSTppGVTVnnFDKRYLITWYEIARFDHRFERGLEKVTATYSLRDDGGL---NIN-----kgynpdrgmqwqsegkayftgapt ra<br/>--qeeaeqnlseisgpwrtvyigstnpekiqengpfrtyfrELVDDEKgtVDFYFSVrdgkwnvhvkatkqddgtvadyGQNVFKIVSLS--RTHLVAHNINVDKH--QTTTELTLFVKLNVEDDLEKFWKLTEDKGIKKNVNFlenenhphe-----</p> <p>lkvsffgpfyggynvialdreyrhalvcgpdrylwlisrtpptIsdevkqemlavatregfdvskfiwvqqpg</p> <p>Proposed: aliSize=124 (resi) RMSD=2.40 (Å)<br/>hlestslYkksstpprgvtvv--NFDKRYLITWYEIARFD--D-H---RFEgLeKVTATYS-L--rdDGLNVINKGyN--pdRgMWOOSEGKAYFTG-aptRaALKVSFFgpfYGGYNVIA DreYRHALVCGP-----DrDYLWILSRtptIsDEVKOEMLAVATREFFVSKFIWV<br/>-----qeeAEQNLSELSIPRTVYIGStnPeKIQENGPFR--T--YFRELVDde--KTVDFYFSV-Krd--G-KKNVHVKA TKQDD---G-TYVADYE--GQNVFKIVSLS--RTLVAHNINvdkhgqtTELTLFVKLNVEDDLEKFWKLTEDKGIKKNVNF</p> <p>Q-----pg<br/>Lenenhphe---</p>                                                                      |
|     | 1gt1A<br>(158) |   |      | <p>hl-----STSLYKKSSTppGVTVnnFDKRYLITWYEIARFDHRFERGLEKVTATYSLRDDGGL---NIN-----kgynpdrgmqwqsegkayftgapt ra<br/>--qeeaeqnlseisgpwrtvyigstnpekiqengpfrtyfrELVDDEKgtVDFYFSVrdgkwnvhvkatkqddgtvadyGQNVFKIVSLS--RTHLVAHNINVDKH--QTTTELTLFVKLNVEDDLEKFWKLTEDKGIKKNVNFlenenhphe-----</p> <p>lkvsffgpfyggynvialdreyrhalvcgpdrylwlisrtpptIsdevkqemlavatregfdvskfiwvqqpg</p> <p>Proposed: aliSize=124 (resi) RMSD=2.40 (Å)<br/>hlestslYkksstpprgvtvv--NFDKRYLITWYEIARFD--D-H---RFEgLeKVTATYS-L--rdDGLNVINKGyN--pdRgMWOOSEGKAYFTG-aptRaALKVSFFgpfYGGYNVIA DreYRHALVCGP-----DrDYLWILSRtptIsDEVKOEMLAVATREFFVSKFIWV<br/>-----qeeAEQNLSELSIPRTVYIGStnPeKIQENGPFR--T--YFRELVDde--KTVDFYFSV-Krd--G-KKNVHVKA TKQDD---G-TYVADYE--GQNVFKIVSLS--RTLVAHNINvdkhgqtTELTLFVKLNVEDDLEKFWKLTEDKGIKKNVNF</p> <p>Q-----pg<br/>Lenenhphe---</p>                                                                                                                                                                                                                                                                                                                                                                                                                                                                                                                                                                                                                                                                                                                                                                                                                                                                                                                                                                                                                          |



|     |                                               |   |       |                                                                                                                                                                                                                                                                                                                                                                                                                                                                                                                                                                                                                                                                                                                                                                                                                                                                                                                                                                                                                                                                                                                                                                                                                                                                                                                                                                                                                                                                                                                                                                                                                                                                         |
|-----|-----------------------------------------------|---|-------|-------------------------------------------------------------------------------------------------------------------------------------------------------------------------------------------------------------------------------------------------------------------------------------------------------------------------------------------------------------------------------------------------------------------------------------------------------------------------------------------------------------------------------------------------------------------------------------------------------------------------------------------------------------------------------------------------------------------------------------------------------------------------------------------------------------------------------------------------------------------------------------------------------------------------------------------------------------------------------------------------------------------------------------------------------------------------------------------------------------------------------------------------------------------------------------------------------------------------------------------------------------------------------------------------------------------------------------------------------------------------------------------------------------------------------------------------------------------------------------------------------------------------------------------------------------------------------------------------------------------------------------------------------------------------|
| 960 | <p>2q39B<br/>(151)</p> <p>1pboB<br/>(151)</p> | C | 15.89 | <p><b>TM-align:</b> aliSize=115 (resi) RMSD=2.37 (Å)<br/> qtmkg1DIQKVAQTWYSLAMAASDI SLLD AqSAPLRVYVEELKPT-PECDLEILLQKWENDECAQKKI IAEKTKIPaVFKI DALNEKVLVLDTDyKKYLLFCMESA-EPEQSLVCQCLVRTPEvddealekfdkalkalpmhirlsfnp-----TQ-<br/> -----NLSELSGPPWRTVYIGSTNPEKIQE-NGPFRTYFREL VFDdEKITVDFYFSVKRDGKWKNVHVKATKQDDG-TYVAIYEGONVFKIVSLS-RTHLVAHNI VDKHGQKTEL TGLFVKNL-----vededlekfwkltedgidkknvvnflenedhPhPe</p> <p><b>SARST:</b> aliSize=135 (resi) RMSD=13.53 (Å)<br/> qtmkgldi--QKVAQTWYSLAMAASDI SLLD AqSAPLRVYVEELKPT-PECDLEILLQKWENDECAQKKI IAEKTKIPaVFKI DALNEKVLVLDTDyKKYLLFCMESA-EPEQSLVCQCLVRTPEVDDEALEKFDKALKALPM--HTRL-----sfnptq<br/> -----nlSELSGPPWRTVYIGSTNPEKIQE-NGPFRTYFREL VFDdEKITVDFYFSVKRDGKWKNVHVKATKQDDG-DGTYVAIYEGONVFKIVSLSRTHLVAHNI VDKHGQKTEL TGLFVKNLVEDEDLEKFWKLTEDKIDKKNVNFlenedhphpe-----</p> <p><b>BLAST:</b> aliSize=53 (resi) iden=16.56% (25/151) simi=35.10% (53/151)<br/> qtmkg1DIQKVAQTWYSLAMAASDI SLLD AqSAPLRVYVEELKPT-PECDLEILLQKWENDECAQKKI IAEKTKIPaVFKI DALNEKVLVLDTDyKKYLLFCMESA-EPEQSLVCQCLVRTPEVDDEALEKFDKALKALPMH--IRLSFNPT--Q----<br/> -----NLSELSGPPWRTVYIGSTNPEKIQE-NGPFRTYFREL VFDdEKITVDFYFSVKRDGKWKNVHVKATKQDDG-DGTYVAIYEGONVFKIVSLS-RTHLVAHNI VDKHGQKTEL TGLFVKNLVEDEDLEKFWKLTEDKIDKKNVNFlenedhphpe-----</p> <p><b>Proposed:</b> aliSize=139 (resi) RMSD=1.99 (Å)<br/> qtmkg1DIQKVAQTWYSLAMAASDI SLLD AqSAPLRVYVEELKPT-PECDLEILLQKWENDECAQKKI IAEKTKIPaVFKI DALNEKVLVLDTDyKKYLLFCMESA-EPEQSLVCQCLVRTPEVDDEALEKFDKALKALPMH--IRLSFNPT--Q----<br/> -----NLSELSGPPWRTVYIGSTNPEKIQE-NGPFRTYFREL VFDdEKITVDFYFSVKRDGKWKNVHVKATKQDDG-TYVAIYEGONVFKIVSLS-RTHLVAHNI VDKHGQKTEL TGLFVKNLVEDEDLEKFWKLTEDKIDKKNVNFlenedhphpe</p> |
| 961 | <p>1bj7A<br/>(150)</p> <p>1g85A<br/>(159)</p> | C | 26.67 | <p><b>TM-align:</b> aliSize=117 (resi) RMSD=2.11 (Å)<br/> -----IDPSKIPQEWRI IYAAADKDKIVGGPLRNYYRRIE CINDCESLSITTYLKDQCTCLL TEVAKRQEGYVYVLEFYITNTLEVIHVS ENMLV TYVENYD-GERI TKMTEGLAKGtsftpeeleyqqlnsergvpnienienlikt-----DNCpp-<br/> aqeeaeqnlSELSGPPWRTVYIGSTNPEKIQENGPFRITFR--ELVFDDEKGTVDYFYSVKRDGKWKNVHVKATKQDDGTYADYEQONVFKIVSLSRTHLVAHNI VDKHGQKTEL TGLFVKNL-----nvededlekfwkltedgidkknvvnflenehPHPe--e</p> <p><b>SARST:</b> aliSize=137 (resi) RMSD=13.33 (Å)<br/> idps-----KIPQEWRI IYAAADKDKIVGGPLRNYYRRIE CINDCESLSITTYLKDQCTCLL TEVAKRQEGYVYVLEFYITNTLEVIHVS ENMLV TYVENYD-DGERITKMTEGLAKGtsftPEELEYQQLNSERGVPNENIENLI-----ktdncpp<br/> ----aqeeaeqnlSELSGPPWRTVYIGSTNPEKIQENGPFRITFR--ELVFDDEKGTVDYFYSVKRDGKWKNVHVKATKQDDGTYADYEQONVFKIVSLSRTHLVAHNI VDKHGQKTEL TGLFVKNLVEDEDLEKFWKLTEDKIDKKNVNFlenedhphpe-----</p> <p><b>BLAST:</b> aliSize=81 (resi) iden=30.67% (46/150) simi=54.00% (81/150)<br/> idp-----SKIPQEWRI IYAAADKDKIVGGPLRNYYRRIE CINDCESLSITTYLKDQCTCLL TEVAKRQEGYVYVLEFYITNTLEVIHVS ENMLV TYVENYD-GERI TKMTEGLAKGtsftPEELEYQQLNSERGVPNENIENLIKTDNCP---p<br/> ----aqeeaeqnlSELSGPPWRTVYIGSTNPEKIQENGPFRITFR--ELVFDDEKGTVDYFYSVKRDGKWKNVHVKATKQDDGTYADYEQONVFKIVSLSRTHLVAHNI VDKHGQKTEL TGLFVKNLVEDEDLEKFWKLTEDKIDKKNVNFLENEDHPHe-</p> <p><b>Proposed:</b> aliSize=147 (resi) RMSD=1.80 (Å)<br/> i-----DPKIPQEWRI IYAAADKDKIVGGPLRNYYRRIE CINDCESLSITTYLKDQCTCLL TEVAKRQEGYVYVLEFYITNTLEVIHVS ENMLV TYVENYD-GERI TKMTEGLAKGtsftPEELEYQQLNSERGVPNENIENLIKT--DNCP--p<br/> -aqeeaeqnlSELSGPPWRTVYIGSTNPEKIQENGPFRITFR--ELVFDDEKGTVDYFYSVKRDGKWKNVHVKATKQDDGTYADYEQONVFKIVSLSRTHLVAHNI VDKHGQKTEL TGLFVKNLVEDEDLEKFWKLTEDKIDKKNVNFLENEDHPHe-</p>  |
| 962 | <p>1bj7A<br/>(150)</p> <p>1pboB<br/>(151)</p> | C | 26.67 | <p><b>TM-align:</b> aliSize=117 (resi) RMSD=2.21 (Å)<br/> iDPSKIPQEWRI IYAAADKDKIVGGPLRNYYRRIE CINDCESLSITTYLKDQCTCLL TEVAKRQEGYVYVLEFYITNTLEVIHVS ENMLV TYVENYD-GERI TKMTEGLAKGtsftpeeleyqqlnsergvpnienienlikt-----TDNCpp-<br/> -NLSELSGPPWRTVYIGSTNPEKIQENGPFRITFR--ELVFDDEKGTVDYFYSVKRDGKWKNVHVKATKQDDGTYADYEQONVFKIVSLSRTHLVAHNI VDKHGQKTEL TGLFVKNL-----nvededlekfwkltedgidkknvvnflenedhPHPe--</p> <p><b>SARST:</b> aliSize=134 (resi) RMSD=13.45 (Å)<br/> idps---KIPQEWRI IYAAADKDKIVGGPLRNYYRRIE CINDCESLSITTYLKDQCTCLL TEVAKRQEGYVYVLEFYITNTLEVIHVS ENMLV TYVENYD-DGERITKMTEGLAKGtsftPEELEYQQLNSERGVPNENIENLI-----ktdncpp<br/> ----nlsELSGPPWRTVYIGSTNPEKIQENGPFRITFR--ELVFDDEKGTVDYFYSVKRDGKWKNVHVKATKQDDGTYADYEQONVFKIVSLSRTHLVAHNI VDKHGQKTEL TGLFVKNLVEDEDLEKFWKLTEDKIDKKNVNFlenedhphpe-----</p> <p><b>BLAST:</b> aliSize=83 (resi) iden=30.67% (46/150) simi=55.33% (83/150)<br/> idp--SKIPQEWRI IYAAADKDKIVGGPLRNYYRRIE CINDCESLSITTYLKDQCTCLL TEVAKRQEGYVYVLEFYITNTLEVIHVS ENMLV TYVENYD--GERI TKMTEGLAKGtsftPEELEYQQLNSERGVPNENIENLIKTDNCP---p<br/> ----nlSELSGPPWRTVYIGSTNPEKIQENGPFRITFR--ELVFDDEKGTVDYFYSVKRDGKWKNVHVKATKQDDGTYADYEQONVFKIVSLSRTHLVAHNI VDKHGQKTEL TGLFVKNLVEDEDLEKFWKLTEDKIDKKNVNFLENEDHPHe-</p> <p><b>Proposed:</b> aliSize=147 (resi) RMSD=1.81 (Å)<br/> iDPSKIPQEWRI IYAAADKDKIVGGPLRNYYRRIE CINDCESLSITTYLKDQCTCLL TEVAKRQEGYVYVLEFYITNTLEVIHVS ENMLV TYVENYD-GERI TKMTEGLAKGtsftPEELEYQQLNSERGVPNENIENLIKT--DNCP--p<br/> -NLSELSGPPWRTVYIGSTNPEKIQENGPFRITFR--ELVFDDEKGTVDYFYSVKRDGKWKNVHVKATKQDDGTYADYEQONVFKIVSLSRTHLVAHNI VDKHGQKTEL TGLFVKNLVEDEDLEKFWKLTEDKIDKKNVNFLENEDHPHe-</p>                                         |

|     |                                                             |   |       |                                                                                                                                                                                                                                                                                                                                                                                                                                                                                                                                                                                                                                                                                                                                                                                                                                                                                                                                                                                                                                                                                                                                                                                                                                                                                                                                                                                                                                                                                                                                                                                                                               |
|-----|-------------------------------------------------------------|---|-------|-------------------------------------------------------------------------------------------------------------------------------------------------------------------------------------------------------------------------------------------------------------------------------------------------------------------------------------------------------------------------------------------------------------------------------------------------------------------------------------------------------------------------------------------------------------------------------------------------------------------------------------------------------------------------------------------------------------------------------------------------------------------------------------------------------------------------------------------------------------------------------------------------------------------------------------------------------------------------------------------------------------------------------------------------------------------------------------------------------------------------------------------------------------------------------------------------------------------------------------------------------------------------------------------------------------------------------------------------------------------------------------------------------------------------------------------------------------------------------------------------------------------------------------------------------------------------------------------------------------------------------|
| 963 | <p><b>1bj7A</b><br/>(150)</p> <p><b>1gt3A</b><br/>(159)</p> | C | 27.33 | <p><b>TM-align:</b> aliSize=117 (resi) RMSD=2.10 (Å)<br/> -----IDPSKIPTEWRIIYAAADNKDKIVEGGPLRNYYRRIECINDCESLSTITFYLDQCTCLL TEVAKRQEGYVYVLEFYGTNLEVIHVSENMLVTVYVNYD-GERITKMTGLAKGtsftpeeleyqqInsergvnpnenienlikt-----DNCpp-<br/> aqeeaeqNLSELSCPWRITVYIGSTNPEKIQENGFRTYFREL VFDDEKGTVDYFYSVVRDCKWKNVHVKATKODDGTIVADYEQVFKIVSLSRTHVAHNIIVdKHGQTTELTLFVKL-----nvededlekfwkltedkgidkknvvnflenenhPHP--e</p> <p><b>SARST:</b> aliSize=140 (resi) RMSD=13.19 (Å)<br/> i-----DPKIPTEWRIIYAAADNKDKIVEGGPLRNYYRRIECINDCESLSTITFYLDQCTCLL TEVAKRQEGYVYVLEFYGTNLEVIHVSENMLVTVYVNYD-GERITKMTGLAKGtsftpeeleyqqInsergvnpnenienlikt-----ktdnpp<br/> -aqeeaeqNLSELSCPWRITVYIGSTNPEKIQENGFRTYFREL VFDDEKGTVDYFYSVVRDCKWKNVHVKATKODDGTIVADYEQVFKIVSLSRTHVAHNIIVdKHGQTTELTLFVKL-----VEDLEKFWKLTEDKIDKKNVVNFLenenhphe-----</p> <p><b>BLAST:</b> aliSize=81 (resi) iden=30.67% (46/150) simi=54.00% (81/150)<br/> idp-----SKIPTEWRIIYAAADNKDKIVEGGPLRNYYRRIECINDCESLSTITFYLDQCTCLL TEVAKRQEGYVYVLEFYGTNLEVIHVSENMLVTVYVNYD-GERITKMTGLAKGtsftpeeleyqqInsergvnpnenienliktDNCP---p<br/> ---aqeeaeqnlSELSCPWRITVYIGSTNPEKIQENGFRTYFREL VFDDEKGTVDYFYSVVRDCKWKNVHVKATKODDGTIVADYEQVFKIVSLSRTHVAHNIIVdKHGQTTELTLFVK-LNVEDLEKFWKLTEDKIDKKNVVNFLenenHPhe-</p> <p><b>Proposed:</b> aliSize=147 (resi) RMSD=1.79 (Å)<br/> i-----DPKIPTEWRIIYAAADNKDKIVEGGPLRNYYRRIECINDCESLSTITFYLDQCTCLL TEVAKRQEGYVYVLEFYGTNLEVIHVSENMLVTVYVNYD-GERITKMTGLAKGtsftpeeleyqqInsergvnpnenienlikt-----DNCp-p<br/> -aqeeaeqNLSELSCPWRITVYIGSTNPEKIQENGFRTYFREL VFDDEKGTVDYFYSVVRDCKWKNVHVKATKODDGTIVADYEQVFKIVSLSRTHVAHNIIVdKHGQTTELTLFVK-LNVEDLEKFWKLTEDKIDKKNVVNFLenenHPHe-</p> |
| 964 | <p><b>1bj7A</b><br/>(150)</p> <p><b>1gt1A</b><br/>(158)</p> | C | 27.33 | <p><b>TM-align:</b> aliSize=117 (resi) RMSD=2.12 (Å)<br/> -----IDPSKIPTEWRIIYAAADNKDKIVEGGPLRNYYRRIECINDCESLSTITFYLDQCTCLL TEVAKRQEGYVYVLEFYGTNLEVIHVSENMLVTVYVNYD-GERITKMTGLAKGtsftpeeleyqqInsergvnpnenienlikt-----DNCpp-<br/> qeeaeqNLSELSCPWRITVYIGSTNPEKIQENGFRTYFREL VFDDEKGTVDYFYSVVRDCKWKNVHVKATKODDGTIVADYEQVFKIVSLSRTHVAHNIIVdKHGQTTELTLFVKL-----nvededlekfwkltedkgidkknvvnflenenhPHP--e</p> <p><b>SARST:</b> aliSize=135 (resi) RMSD=13.39 (Å)<br/> idps-----KIPTEWRIIYAAADNKDKIVEGGPLRNYYRRIECINDCESLSTITFYLDQCTCLL TEVAKRQEGYVYVLEFYGTNLEVIHVSENMLVTVYVNYD-GERITKMTGLAKGtsftpeeleyqqInsergvnpnenienlikt-----ktdnpp<br/> ---qeeaeqnlSELSCPWRITVYIGSTNPEKIQENGFRTYFREL VFDdeKG--TVDFYFSVVRDCKWKNVHVKATKODDGTIVADYEQVFKIVSLSRTHVAHNIIVdKHGQTTELTLFVK-LNVEDLEKFWKLTEDKIDKKNVVNFLenenhphe-----</p> <p><b>BLAST:</b> aliSize=81 (resi) iden=30.67% (46/150) simi=54.00% (81/150)<br/> idp-----SKIPTEWRIIYAAADNKDKIVEGGPLRNYYRRIECINDCESLSTITFYLDQCTCLL TEVAKRQEGYVYVLEFYGTNLEVIHVSENMLVTVYVNYD-GERITKMTGLAKGtsftpeeleyqqInsergvnpnenienliktDNCP---p<br/> ---qeeaeqnlSELSCPWRITVYIGSTNPEKIQENGFRTYFREL VFDDEKGTVDYFYSVVRDCKWKNVHVKATKODDGTIVADYEQVFKIVSLSRTHVAHNIIVdKHGQTTELTLFVK-LNVEDLEKFWKLTEDKIDKKNVVNFLenenHPhe-</p> <p><b>Proposed:</b> aliSize=147 (resi) RMSD=1.80 (Å)<br/> i-----DPKIPTEWRIIYAAADNKDKIVEGGPLRNYYRRIECINDCESLSTITFYLDQCTCLL TEVAKRQEGYVYVLEFYGTNLEVIHVSENMLVTVYVNYD-GERITKMTGLAKGtsftpeeleyqqInsergvnpnenienlikt-----DNCp-p<br/> -qeeaeqNLSELSCPWRITVYIGSTNPEKIQENGFRTYFREL VFDDEKGTVDYFYSVVRDCKWKNVHVKATKODDGTIVADYEQVFKIVSLSRTHVAHNIIVdKHGQTTELTLFVK-LNVEDLEKFWKLTEDKIDKKNVVNFLenenHPHe-</p>   |
| 965 | <p><b>1dzkA</b><br/>(148)</p> <p><b>1g85A</b><br/>(159)</p> | C | 42.57 | <p><b>TM-align:</b> aliSize=115 (resi) RMSD=1.63 (Å)<br/> -----F-ELSKNIIISYIGSSDLEKIGENAPFQVFMRSIEFDDKESKYLNFSKENGICEEFSLIGTKQEGNTYDVAAGNKKVVSYASEIATIIISNINVDEEDDKIIMTGLLKGtdiedqdlekfkvtrengipeenivniier-----DDCPa<br/> aqeeaeqnlSELSCPWRITVYIGSTNPEKIQENGFRTYFREL VFDDEKGTVDYFYSVVRDCKWKNVHVKATKODDGTIVADYEQVFKIVSLSRTHVAHNIIVdKHGQTTELTLFVKL-----nvededlekfwkltedkgidkknvvnflenenhHPHe-</p> <p><b>SARST:</b> aliSize=123 (resi) RMSD=14.09 (Å)<br/> fe-----LSCKNIIISYIGSSDLEKIGENAPFQVFMRSIEFDDKESKYLNFSKENGICEEFSLIGTKQEGN-----TVDVNAAGNKKVVSYASEIATIIISNINVDEEDDKIIMTGLLKGtdiedqdlekfkvtrengipeenivniier-----erddcpa<br/> --aqeeaeqnlSELSCPWRITVYIGSTNPEKIQENGFRTYFREL VFDDEKGTVDYFYSVVRDCKWKNVHVKATKODDGTIVADYEQVFKIVSLSRTHVAHNIIVdKHGQTTELTLFVKL-NVEDLEKFWKLTEDKIDKKNVVNFLenenhphe-----</p> <p><b>BLAST:</b> aliSize=91 (resi) iden=42.57% (63/148) simi=61.49% (91/148)<br/> f-----ELSKNIIISYIGSSDLEKIGENAPFQVFMRSIEFDDKESKYLNFSKENGICEEFSLIGTKQEGNTYDVAAGNKKVVSYASEIATIIISNINVDEEDDKIIMTGLLKGtdiedqdlekfkvtrengipeenivniierDDCP---a<br/> -aqeeaeqnlSELSCPWRITVYIGSTNPEKIQENGFRTYFREL VFDDEKGTVDYFYSVVRDCKWKNVHVKATKODDGTIVADYEQVFKIVSLSRTHVAHNIIVdKHGQTTELTLFVK-LNVEDLEKFWKLTEDKIDKKNVVNFLenenHPhe-</p> <p><b>Proposed:</b> aliSize=146 (resi) RMSD=1.41 (Å)<br/> -----F-ELSKNIIISYIGSSDLEKIGENAPFQVFMRSIEFDDKESKYLNFSKENGICEEFSLIGTKQEGNTYDVAAGNKKVVSYASEIATIIISNINVDEEDDKIIMTGLLKGtdiedqdlekfkvtrengipeenivniier--DDCP-a<br/> aqeeaeqnlSELSCPWRITVYIGSTNPEKIQENGFRTYFREL VFDDEKGTVDYFYSVVRDCKWKNVHVKATKODDGTIVADYEQVFKIVSLSRTHVAHNIIVdKHGQTTELTLFVK-LNVEDLEKFWKLTEDKIDKKNVVNFLenenHPHe-</p>                       |

|     |                                       |   |       |                                                                                                                                                                                                                                                                                                                                                                                                                                                                                                                                                                                                                                                                                                                                                                                                                                                                                                                                                                                                                                                                                                                                                                                                                                                                                                                                                                                                                                                                                                                                                                                                                                      |
|-----|---------------------------------------|---|-------|--------------------------------------------------------------------------------------------------------------------------------------------------------------------------------------------------------------------------------------------------------------------------------------------------------------------------------------------------------------------------------------------------------------------------------------------------------------------------------------------------------------------------------------------------------------------------------------------------------------------------------------------------------------------------------------------------------------------------------------------------------------------------------------------------------------------------------------------------------------------------------------------------------------------------------------------------------------------------------------------------------------------------------------------------------------------------------------------------------------------------------------------------------------------------------------------------------------------------------------------------------------------------------------------------------------------------------------------------------------------------------------------------------------------------------------------------------------------------------------------------------------------------------------------------------------------------------------------------------------------------------------|
| 966 | <p>1dzkA (148)</p> <p>1pboB (151)</p> | C | 43.24 | <p><b>TM-align:</b> aliSize=115 (resi) RMSD=1.67 (Å)<br/> - F-ELSGKNIISYIGSSDLEKIGENAPFQVFMRSIEFDDKESKYYLNFSKENGICEEFSLIGTKQEGNTYDNYAAGNKKFVVSYSASETALIIISNINVDEEGDKTIMITGLLGGKTDiedqdlekfkevtrengipeenivniier-----DDCpa<br/> nLsELSGPWRIVYIGSTNPEKIQENGPRTYFRELVEDEKGTDFYFSVSRDKWKNVHVKATKODDGTIVADYEQNVKIVSLSRTHVAHNINVDKHCQOTELTEL FVKL-----nvededlekfwkltedkgidkknvvnflenedhpHE--</p> <p><b>SARST:</b> aliSize=138 (resi) RMSD=13.43 (Å)<br/> fe-----LSGKNIISYIGSSDLEKIGENAPFQVFMRSIEFDDKESKYYLNFSKENGICEEFSLIGTKQEGNTYDNYAAGNKKFVVSYSASETALIIISNINVDEEGDKTIMITGLLGGKTDIEDQDLEKFKVETRENGIPEENIVNIIE-----erddcpa<br/> --nlseLSGPWRIVYIGSTNPEKIQENGPRTYFRELVEDEKGTDFYFSVSRDKWKNVHVKATKODDGTIVADYEQNVKIVSLSRTHVAHNINVDKHCQOTELTEL FVKL-KLNVEDEDLEKFWKLTEDKGI DKKNVVNFLENEDHPHE-----</p> <p><b>BLAST:</b> aliSize=92 (resi) iden=43.92% (65/148) simi=62.16% (92/148)<br/> f---ELSGKNIISYIGSSDLEKIGENAPFQVFMRSIEFDDKESKYYLNFSKENGICEEFSLIGTKQEGNTYDNYAAGNKKFVVSYSASETALIIISNINVDEEGDKTIMITGLLGGKTDIEDQDLEKFKVETRENGIPEENIVNIIEERDDCP----a<br/> -nlsELSGPWRIVYIGSTNPEKIQENGPRTYFRELVEDEKGTDFYFSVSRDKWKNVHVKATKODDGTIVADYEQNVKIVSLSRTHVAHNINVDKHCQOTELTEL FVK-LNVEDEDLEKFWKLTEDKGI DKKNVVNFLENEDHPHE--</p> <p><b>Proposed:</b> aliSize=146 (resi) RMSD=1.43 (Å)<br/> - F-ELSGKNIISYIGSSDLEKIGENAPFQVFMRSIEFDDKESKYYLNFSKENGICEEFSLIGTKQEGNTYDNYAAGNKKFVVSYSASETALIIISNINVDEEGDKTIMITGLLGGKTDIEDQDLEKFKVETRENGIPEENIVNIIEER--DDC--a<br/> nLsELSGPWRIVYIGSTNPEKIQENGPRTYFRELVEDEKGTDFYFSVSRDKWKNVHVKATKODDGTIVADYEQNVKIVSLSRTHVAHNINVDKHCQOTELTEL FVK-LNVEDEDLEKFWKLTEDKGI DKKNVVNFLENEDHPHE--</p>                                       |
| 967 | <p>1dzkA (148)</p> <p>1gt3A (159)</p> | C | 41.89 | <p><b>TM-align:</b> aliSize=115 (resi) RMSD=1.62 (Å)<br/> -----F-ELSGKNIISYIGSSDLEKIGENAPFQVFMRSIEFDDKESKYYLNFSKENGICEEFSLIGTKQEGNTYDNYAAGNKKFVVSYSASETALIIISNINVDEEGDKTIMITGLLGGKTDiedqdlekfkevtrengipeenivniier-----DDCpa<br/> aqeeaeqnlSLSGPWRIVYIGSTNPEKIQENGPRTYFRELVEDEKGTDFYFSVSRDKWKNVHVKATKODDGTIVADYEQNVKIVSLSRTHVAHNINVDKHCQOTELTEL FVKL-----nvededlekfwkltedkgidkknvvnflenenhpHE--</p> <p><b>SARST:</b> aliSize=123 (resi) RMSD=14.07 (Å)<br/> fe-----LSGKNIISYIGSSDLEKIGENAPFQVFMRSIEFDDKESKYYLNFSKENGiceefsligtqegn-----YDNYAAGNKKFVVSYSASETALIIISNINVDEEGDKTIMITGLLGGKTDIEDQDLEKFKVETRENGIPEENIVNIIE-----erddcpa<br/> --aqeeaeqnlseLSGPWRIVYIGSTNPEKIQENGPRTYFRELVEDEKGTDFYFSVSRDK-----kwknvhvkatkqddgTYADYEQNVKIVSLSRTHVAHNINVDKHCQOTELTEL FVKLNVEDEDLEKFWKLTEDKGI DKKNVVNFLENEDHPHE-----</p> <p><b>BLAST:</b> aliSize=90 (resi) iden=41.89% (62/148) simi=60.81% (90/148)<br/> f-----ELSGKNIISYIGSSDLEKIGENAPFQVFMRSIEFDDKESKYYLNFSKENGICEEFSLIGTKQEGNTYDNYAAGNKKFVVSYSASETALIIISNINVDEEGDKTIMITGLLGGKTDIEDQDLEKFKVETRENGIPEENIVNIIEERDDCP----a<br/> -aqeeaeqnlSLSGPWRIVYIGSTNPEKIQENGPRTYFRELVEDEKGTDFYFSVSRDKWKNVHVKATKODDGTIVADYEQNVKIVSLSRTHVAHNINVDKHCQOTELTEL FVK-LNVEDEDLEKFWKLTEDKGI DKKNVVNFLENEDHPHE--</p> <p><b>Proposed:</b> aliSize=146 (resi) RMSD=1.40 (Å)<br/> -----F-ELSGKNIISYIGSSDLEKIGENAPFQVFMRSIEFDDKESKYYLNFSKENGICEEFSLIGTKQEGNTYDNYAAGNKKFVVSYSASETALIIISNINVDEEGDKTIMITGLLGGKTDIEDQDLEKFKVETRENGIPEENIVNIIEER--DDC--a<br/> aqeeaeqnlSLSGPWRIVYIGSTNPEKIQENGPRTYFRELVEDEKGTDFYFSVSRDKWKNVHVKATKODDGTIVADYEQNVKIVSLSRTHVAHNINVDKHCQOTELTEL FVK-LNVEDEDLEKFWKLTEDKGI DKKNVVNFLENEDHPHE--</p> |
| 968 | <p>1dzkA (148)</p> <p>1gt1A (158)</p> | C | 41.89 | <p><b>TM-align:</b> aliSize=115 (resi) RMSD=1.64 (Å)<br/> -----F-ELSGKNIISYIGSSDLEKIGENAPFQVFMRSIEFDDKESKYYLNFSKENGICEEFSLIGTKQEGNTYDNYAAGNKKFVVSYSASETALIIISNINVDEEGDKTIMITGLLGGKTDiedqdlekfkevtrengipeenivniier-----DDCpa<br/> qeeaeqnlSLSGPWRIVYIGSTNPEKIQENGPRTYFRELVEDEKGTDFYFSVSRDKWKNVHVKATKODDGTIVADYEQNVKIVSLSRTHVAHNINVDKHCQOTELTEL FVKL-----nvededlekfwkltedkgidkknvvnflenenhpHE--</p> <p><b>SARST:</b> aliSize=123 (resi) RMSD=14.05 (Å)<br/> fe-----LSGKNIISYIGSSDLEKIGENAPFQVFMRSIEFDDKESKYYLNFSKENGiceefsligtqegn-----YDNYAAGNKKFVVSYSASETALIIISNINVDEEGDKTIMITGLLGGKTDIEDQDLEKFKVETRENGIPEENIVNIIE-----erddcpa<br/> --qeeaeqnlseLSGPWRIVYIGSTNPEKIQENGPRTYFRELVEDEKGTDFYFSVSRDK-----kwknvhvkatkqddgTYADYEQNVKIVSLSRTHVAHNINVDKHCQOTELTEL FVK-LNVEDEDLEKFWKLTEDKGI DKKNVVNFLENEDHPHE-----</p> <p><b>BLAST:</b> aliSize=90 (resi) iden=41.89% (62/148) simi=60.81% (90/148)<br/> f-----ELSGKNIISYIGSSDLEKIGENAPFQVFMRSIEFDDKESKYYLNFSKENGICEEFSLIGTKQEGNTYDNYAAGNKKFVVSYSASETALIIISNINVDEEGDKTIMITGLLGGKTDIEDQDLEKFKVETRENGIPEENIVNIIEERDDCP----a<br/> -qeeaeqnlSLSGPWRIVYIGSTNPEKIQENGPRTYFRELVEDEKGTDFYFSVSRDKWKNVHVKATKODDGTIVADYEQNVKIVSLSRTHVAHNINVDKHCQOTELTEL FVK-LNVEDEDLEKFWKLTEDKGI DKKNVVNFLENEDHPHE--</p> <p><b>Proposed:</b> aliSize=146 (resi) RMSD=1.42 (Å)<br/> -----F-ELSGKNIISYIGSSDLEKIGENAPFQVFMRSIEFDDKESKYYLNFSKENGICEEFSLIGTKQEGNTYDNYAAGNKKFVVSYSASETALIIISNINVDEEGDKTIMITGLLGGKTDIEDQDLEKFKVETRENGIPEENIVNIIEER--DDC--a<br/> qeeaeqnlSLSGPWRIVYIGSTNPEKIQENGPRTYFRELVEDEKGTDFYFSVSRDKWKNVHVKATKODDGTIVADYEQNVKIVSLSRTHVAHNINVDKHCQOTELTEL FVK-LNVEDEDLEKFWKLTEDKGI DKKNVVNFLENEDHPHE--</p>    |

|     |                                       |   |       |                                                                                                                                                                                                                                                                                                                                                                                                                                                                                                                                                                                                                                                                                                                                                                                                                                                                                                                                                                                                                                                                                                                                                                                                                                                                                                                                                                                                                                                                                                                                                                                                                                                                                                                                                               |
|-----|---------------------------------------|---|-------|---------------------------------------------------------------------------------------------------------------------------------------------------------------------------------------------------------------------------------------------------------------------------------------------------------------------------------------------------------------------------------------------------------------------------------------------------------------------------------------------------------------------------------------------------------------------------------------------------------------------------------------------------------------------------------------------------------------------------------------------------------------------------------------------------------------------------------------------------------------------------------------------------------------------------------------------------------------------------------------------------------------------------------------------------------------------------------------------------------------------------------------------------------------------------------------------------------------------------------------------------------------------------------------------------------------------------------------------------------------------------------------------------------------------------------------------------------------------------------------------------------------------------------------------------------------------------------------------------------------------------------------------------------------------------------------------------------------------------------------------------------------|
| 969 | <p>lew3A (159)</p> <p>1g85A (159)</p> | N | 16.35 | <p><b>TM-align:</b> aliSize=119 (resi) RMSD=2.65 (Å)<br/> vair-----N-FDLSKISGEYYSIFLASDVKKEKTEENGSMRVFVDVTRAL-DNSSLYAEYOTVNGECTEFPMVFDTEEDgVYSLNDCYVFRSEFeNDEIILYLVNFDKDRPFQLEFYAREPdvSpeikeefvkivqrgivkeniidltkidr-----CFOLRg--<br/> -----aqeeAeQNLSELSGPPRTVYIGSTNPEKIQENGPFRITYFRELVFDDKGTVDYFYSVVRDCKWKNVHVKATQDDG-TYVADYEQNVFKVSL-SRTLVAHNIIVDKHGQTTETGLFVKLNVEDDLKFWLWLTEDKGDCKNVNFFLEnenedlekwkltedkgidkknvvnfle</p> <p>-CFOLRg--<br/> nENHPH-pe</p> <p><b>SARST:</b> aliSize=148 (resi) RMSD=13.71 (Å)<br/> v---AIRNFDLSKISGEYYSIFLASDVKKEKTEENGSMRVFVDVTRAL-DNSSLYAEYOTVNGECTEFPMVFDTEEDgVYSLNDCYVFRSEFeNDEIILYLVNFDKDRPFQLEFYAREPdvSPKIKFEVIVOKRGIVKENIIDLTKI-----drcfqlrg<br/> -aqeEEAEQNLSELSGPPRTVYIGSTNPEKIQENGPFRITYFRELVFDDKGTVDYFYSVVRDCKWKNVHVKATQDDG-TYVADYEQNVFKVSL-SRTLVAHNIIVDKHGQTTETGLFVKLNVEDDLKFWLWLTEDKGDCKNVNFFLEnenhphpe-----</p> <p><b>BLAST:</b> aliSize=80 (resi) iden=24.53% (39/159) simi=50.31% (80/159)<br/> vairnf-----DISKISGEYYSIFLASDVKKEKTEENGSMRVFVDVTRAL-DNSSLYAEYOTVNGECTEFPMVFDTEEDgVYSLNDCYVFRSEFeNDEIILYLVNFDKDRPFQLEFYAREPdvSPKIKFEVIVOKRGIVKENIIDLTKI-----ltkidrcfqlrg<br/> -----aqeeaeqNLSELSGPPRTVYIGSTNPEKIQENGPFRITYFRELVFDDKGTVDYFYSVVRDCKWKNVHVKATQDDG-TYVADYEQNVFKVSL-SRTLVAHNIIVDKHGQTTETGLFVKLNVEDDLKFWLWLTEDKGDCKNVNFFLEnenedlekwkltedkgidkknvvnfle</p> <p><b>Proposed:</b> aliSize=120 (resi) RMSD=1.83 (Å)<br/> -VAIRNFDLSKISGEYYSIFLASDVKKEKTEENGSMRVFVDVTRAL-DNSSLYAEYOTVNGECTEFPMVFDTEEDgVYSLNDCYVFRSEFeNDEIILYLVNFDKDRPFQLEFYARE-----pdvspeikeefvkivqrgivkeniidltkidrcfqlRG<br/> aqEEAEQNLSELSGPPRTVYIGSTNPEKIQENGPFRITYFRELVFDDKGTVDYFYSVVRDCKWKNVHVKATQDDG-TYVADYEQNVFKVSL-SRTLVAHNIIVDKHGQTTETGLFVKLNVEDDLKFWLWLTEDKGDCKNVNFFLEnenedlekwkltedkgidkknvvnfle</p> <p>-----<br/> nenhphpe</p> |
| 970 | <p>lew3A (159)</p> <p>1g85A (159)</p> | C | 22.01 | <p><b>TM-align:</b> aliSize=119 (resi) RMSD=2.65 (Å)<br/> vair-----N-FDLSKISGEYYSIFLASDVKKEKTEENGSMRVFVDVTRAL-DNSSLYAEYOTVNGECTEFPMVFDTEEDgVYSLNDCYVFRSEFeNDEIILYLVNFDKDRPFQLEFYAREPdvSpeikeefvkivqrgivkeniidltkidr-----CFOLRg--<br/> -----aqeeAeQNLSELSGPPRTVYIGSTNPEKIQENGPFRITYFRELVFDDKGTVDYFYSVVRDCKWKNVHVKATQDDG-TYVADYEQNVFKVSL-SRTLVAHNIIVDKHGQTTETGLFVKLNVEDDLKFWLWLTEDKGDCKNVNFFLEnenedlekwkltedkgidkknvvnfle</p> <p>-CFOLRg--<br/> nENHPH-pe</p> <p><b>SARST:</b> aliSize=148 (resi) RMSD=13.71 (Å)<br/> v---AIRNFDLSKISGEYYSIFLASDVKKEKTEENGSMRVFVDVTRAL-DNSSLYAEYOTVNGECTEFPMVFDTEEDgVYSLNDCYVFRSEFeNDEIILYLVNFDKDRPFQLEFYAREPdvSPKIKFEVIVOKRGIVKENIIDLTKI-----drcfqlrg<br/> -aqeEEAEQNLSELSGPPRTVYIGSTNPEKIQENGPFRITYFRELVFDDKGTVDYFYSVVRDCKWKNVHVKATQDDG-TYVADYEQNVFKVSL-SRTLVAHNIIVDKHGQTTETGLFVKLNVEDDLKFWLWLTEDKGDCKNVNFFLEnenhphpe-----</p> <p><b>BLAST:</b> aliSize=80 (resi) iden=24.53% (39/159) simi=50.31% (80/159)<br/> vairnf-----DISKISGEYYSIFLASDVKKEKTEENGSMRVFVDVTRAL-DNSSLYAEYOTVNGECTEFPMVFDTEEDgVYSLNDCYVFRSEFeNDEIILYLVNFDKDRPFQLEFYAREPdvSPKIKFEVIVOKRGIVKENIIDLTKI-----ltkidrcfqlrg<br/> -----aqeeaeqNLSELSGPPRTVYIGSTNPEKIQENGPFRITYFRELVFDDKGTVDYFYSVVRDCKWKNVHVKATQDDG-TYVADYEQNVFKVSL-SRTLVAHNIIVDKHGQTTETGLFVKLNVEDDLKFWLWLTEDKGDCKNVNFFLEnenedlekwkltedkgidkknvvnfle</p> <p><b>Proposed:</b> aliSize=148 (resi) RMSD=1.89 (Å)<br/> vairnf-----DISKISGEYYSIFLASDVKKEKTEENGSMRVFVDVTRAL-DNSSLYAEYOTVNGECTEFPMVFDTEEDgVYSLNDCYVFRSEFeNDEIILYLVNFDKDRPFQLEFYAREPdvSPKIKFEVIVOKRGIVKENIIDLTKID-RCFOLRg<br/> -----aqeeaeqNLSELSGPPRTVYIGSTNPEKIQENGPFRITYFRELVFDDKGTVDYFYSVVRDCKWKNVHVKATQDDG-TYVADYEQNVFKVSL-SRTLVAHNIIVDKHGQTTETGLFVKLNVEDDLKFWLWLTEDKGDCKNVNFFLEnenedlekwkltedkgidkknvvnfle</p>                        |
| 971 | <p>lew3A (159)</p> <p>1pboB (151)</p> | C | 23.18 | <p><b>TM-align:</b> aliSize=117 (resi) RMSD=2.45 (Å)<br/> vairnfDISKISGEYYSIFLASDVKKEKTEENGSMRVFVDVTRAL-DNSSLYAEYOTVNGECTEFPMVFDTEEDgVYSLNDCYVFRSEFeNDEIILYLVNFDKDRPFQLEFYAREPdvSpeikeefvkivqrgivkeniidltkidr-----CFOLRg--<br/> -----NLSELSGPPRTVYIGSTNPEKIQENGPFRITYFRELVFDDKGTVDYFYSVVRDCKWKNVHVKATQDDG-TYVADYEQNVFKVSL-SRTLVAHNIIVDKHGQTTETGLFVKLNVEDDLKFWLWLTEDKGDCKNVNFFLEnenedlekwkltedkgidkknvvnflenEDHPH-pe</p> <p><b>SARST:</b> aliSize=139 (resi) RMSD=13.73 (Å)<br/> vairnfdisk---ISGEYYSIFLASDVKKEKTEENGSMRVFVDVTRAL-DNSSLYAEYOTVNGECTEFPMVFDTEEDgVYSLNDCYVFRSEFeNDEIILYLVNFDKDRPFQLEFYAREPdvSPKIKFEVIVOKRGIVKENIIDLTKI-----drcfqlrg<br/> -----nlseLSGPPRTVYIGSTNPEKIQENGPFRITYFRELVFDDKGTVDYFYSVVRDCKWKNVHVKATQDDG-TYVADYEQNVFKVSL-SRTLVAHNIIVDKHGQTTETGLFVKLNVEDDLKFWLWLTEDKGDCKNVNFFLEnenedlekwkltedkgidkknvvnflenEDHPH-pe</p> <p><b>BLAST:</b> aliSize=80 (resi) iden=25.83% (39/151) simi=52.98% (80/151)<br/> vairnfDISKISGEYYSIFLASDVKKEKTEENGSMRVFVDVTRAL-DNSSLYAEYOTVNGECTEFPMVFDTEEDgVYSLNDCYVFRSEFeNDEIILYLVNFDKDRPFQLEFYAREPdvSPKIKFEVIVOKRGIVKENIIDLTKI-----ltkidrcfqlrg<br/> -----NLSELSGPPRTVYIGSTNPEKIQENGPFRITYFRELVFDDKGTVDYFYSVVRDCKWKNVHVKATQDDG-TYVADYEQNVFKVSL-SRTLVAHNIIVDKHGQTTETGLFVKLNVEDDLKFWLWLTEDKGDCKNVNFFLEnenedlekwkltedkgidkknvvnflenEDHPH-pe</p> <p><b>Proposed:</b> aliSize=148 (resi) RMSD=1.91 (Å)<br/> vairnfDISKISGEYYSIFLASDVKKEKTEENGSMRVFVDVTRAL-DNSSLYAEYOTVNGECTEFPMVFDTEEDgVYSLNDCYVFRSEFeNDEIILYLVNFDKDRPFQLEFYAREPdvSPKIKFEVIVOKRGIVKENIIDLTKID-RCFOLRg<br/> -----NLSELSGPPRTVYIGSTNPEKIQENGPFRITYFRELVFDDKGTVDYFYSVVRDCKWKNVHVKATQDDG-TYVADYEQNVFKVSL-SRTLVAHNIIVDKHGQTTETGLFVKLNVEDDLKFWLWLTEDKGDCKNVNFFLEnenedlekwkltedkgidkknvvnflenEDHPH-pe</p>                                               |

|     |   |       |                                                                                                                                                                                                                                                                                                                                                                                                                                                                                                                                                                                                                                                                                                                                                                                                                                                                                                                                                                                                                                                                                                                                                                                                                                                                                                                                                                                                                                                                                                                                                                                                                                                                                                                                                                                                                                                                                                                                                                                                                                                         |
|-----|---|-------|---------------------------------------------------------------------------------------------------------------------------------------------------------------------------------------------------------------------------------------------------------------------------------------------------------------------------------------------------------------------------------------------------------------------------------------------------------------------------------------------------------------------------------------------------------------------------------------------------------------------------------------------------------------------------------------------------------------------------------------------------------------------------------------------------------------------------------------------------------------------------------------------------------------------------------------------------------------------------------------------------------------------------------------------------------------------------------------------------------------------------------------------------------------------------------------------------------------------------------------------------------------------------------------------------------------------------------------------------------------------------------------------------------------------------------------------------------------------------------------------------------------------------------------------------------------------------------------------------------------------------------------------------------------------------------------------------------------------------------------------------------------------------------------------------------------------------------------------------------------------------------------------------------------------------------------------------------------------------------------------------------------------------------------------------------|
| 972 | N | 16.98 | <p><b>lew3A (159)</b></p> <p><b>TM-align:</b> aliSize=119 (resi) RMSD=2.65 (Å)<br/> vair-----N-FD[SKT]S[EN]YSIFLAS[DV]K[E]E[EN]SMR[V]FVDV[IR]AL-DNSSL[YA]EYOT[VN]E[CT]E[FPM]VFD[TE]E[d]g[V]SLN[D]CY[N]VFR[SE]F[e]NDE[II]L[YL]V[N]F[K]-KDRPFO[LF]FYAR[EP]dvspeikeefvkivqrgivkeniidltkidr-----nvededlekfwkltedkgidkknvvnfle<br/> ----aqeeAeQNL[SEL]S[CP]R[TV]YIG[ST]NPEK[IQ]ENG[PFR]TYFREL[VFD]dEKGTVD[DF]YFSV[RD]KWKNVHVKAT[QDD]G-T[V]VAD[IE]Q[N]VFK[V]SL-SRT[LV]AHNI[V]D[k]HGQTE[IT]ELFVKL-----</p> <p>-CFOLRg--<br/> nENHPH-pe</p> <p><b>SARST:</b> aliSize=148 (resi) RMSD=13.70 (Å)<br/> v---AIRNFD[SKT]S[EN]YSIFLAS[DV]K[E]E[EN]SMR[V]FVDV[IR]AL-DNSSL[YA]EYOT[VN]E[CT]E[FPM]VFD[TE]E[d]g[V]SLN[D]CY[N]VFR[SE]F[e]NDE[II]L[YL]V[N]F[K]DRPFOL[FE]FYARE[PD]VSP[IK]E[EV]K[V]VOKRG[V]KENIIDLTKI-----drcfqlrg<br/> -aeEEAEQNL[SEL]S[CP]R[TV]YIG[ST]NPEK[IQ]ENG[PFR]TYFREL[VFD]dEKGTVD[DF]YFSV[RD]KWKNVHVKAT[QDD]G-T[V]VAD[IE]Q[N]VFK[V]SL-SRT[LV]AHNI[V]D[k]HGQTE[IT]ELFVKL-NVED[DL]E[K]W[L]TEDKG[IK]K[V]VNFLENenhphe-----</p> <p><b>BLAST:</b> aliSize=81 (resi) iden=25.16% (40/159) simi=50.94% (81/159)<br/> vairnf-----D[SKT]S[EN]YSIFLAS[DV]K[E]E[EN]SMR[V]FVDV[IR]AL-DNSSL[YA]EYOT[VN]E[CT]E[FPM]VFD[TE]E[d]g[V]SLN[D]CY[N]VFR[SE]F[e]NDE[II]L[YL]V[N]F[K]-DRPFOL[FE]FYARE[PD]VSP[IK]E[EV]K[V]VOKRG[V]KENIID-----ltkidrcfqlrg<br/> -----aqeeaeqNL[SEL]S[CP]R[TV]YIG[ST]NPEK[IQ]ENG[PFR]TYFREL[VFD]dEKGTVD[DF]YFSV[RD]KWKNVHVKAT[QDD]G-T[V]VAD[IE]Q[N]VFK[V]SLSR-T[LV]AHNI[V]D[k]HGQTE[IT]ELFVK-LNVED[DL]E[K]W[L]TEDKG[IK]K[V]VNFlenenhphe-----</p> <p><b>Proposed:</b> aliSize=120 (resi) RMSD=1.83 (Å)<br/> -VAIRNFD[SKT]S[EN]YSIFLAS[DV]K[E]E[EN]SMR[V]FVDV[IR]AL-DNSSL[YA]EYOT[VN]E[CT]E[FPM]VFD[TE]E[d]g[V]SLN[D]CY[N]VFR[SE]F[e]NDE[II]L[YL]V[N]F[K]-KDRPFO[LF]FYARE-----pdvspeikeefvkivqrgivkeniidltkidrcfqlRG<br/> aQEEAEQNL[SEL]S[CP]R[TV]YIG[ST]NPEK[IQ]ENG[PFR]TYFREL[VFD]dEKGTVD[DF]YFSV[RD]KWKNVHVKAT[QDD]G-T[V]VAD[IE]Q[N]VFK[V]SL-SRT[LV]AHNI[V]D[k]HGQTE[IT]ELFVKLnvededlekfwkltedkgidkknvvnf-----LE</p> <p>-----<br/> nenhphe</p> |
| 973 | C | 22.64 | <p><b>lew3A (159)</b></p> <p><b>TM-align:</b> aliSize=119 (resi) RMSD=2.65 (Å)<br/> vair-----N-FD[SKT]S[EN]YSIFLAS[DV]K[E]E[EN]SMR[V]FVDV[IR]AL-DNSSL[YA]EYOT[VN]E[CT]E[FPM]VFD[TE]E[d]g[V]SLN[D]CY[N]VFR[SE]F[e]NDE[II]L[YL]V[N]F[K]-KDRPFO[LF]FYAR[EP]dvspeikeefvkivqrgivkeniidltkidr-----nvededlekfwkltedkgidkknvvnfle<br/> ----aqeeAeQNL[SEL]S[CP]R[TV]YIG[ST]NPEK[IQ]ENG[PFR]TYFREL[VFD]dEKGTVD[DF]YFSV[RD]KWKNVHVKAT[QDD]G-T[V]VAD[IE]Q[N]VFK[V]SL-SRT[LV]AHNI[V]D[k]HGQTE[IT]ELFVKL-----</p> <p>-CFOLRg--<br/> nENHPH-pe</p> <p><b>SARST:</b> aliSize=148 (resi) RMSD=13.70 (Å)<br/> v---AIRNFD[SKT]S[EN]YSIFLAS[DV]K[E]E[EN]SMR[V]FVDV[IR]AL-DNSSL[YA]EYOT[VN]E[CT]E[FPM]VFD[TE]E[d]g[V]SLN[D]CY[N]VFR[SE]F[e]NDE[II]L[YL]V[N]F[K]DRPFOL[FE]FYARE[PD]VSP[IK]E[EV]K[V]VOKRG[V]KENIIDLTKI-----drcfqlrg<br/> -aeEEAEQNL[SEL]S[CP]R[TV]YIG[ST]NPEK[IQ]ENG[PFR]TYFREL[VFD]dEKGTVD[DF]YFSV[RD]KWKNVHVKAT[QDD]G-T[V]VAD[IE]Q[N]VFK[V]SL-SRT[LV]AHNI[V]D[k]HGQTE[IT]ELFVKL-NVED[DL]E[K]W[L]TEDKG[IK]K[V]VNFLENenhphe-----</p> <p><b>BLAST:</b> aliSize=81 (resi) iden=25.16% (40/159) simi=50.94% (81/159)<br/> vairnf-----D[SKT]S[EN]YSIFLAS[DV]K[E]E[EN]SMR[V]FVDV[IR]AL-DNSSL[YA]EYOT[VN]E[CT]E[FPM]VFD[TE]E[d]g[V]SLN[D]CY[N]VFR[SE]F[e]NDE[II]L[YL]V[N]F[K]-DRPFOL[FE]FYARE[PD]VSP[IK]E[EV]K[V]VOKRG[V]KENIID-----ltkidrcfqlrg<br/> -----aqeeaeqNL[SEL]S[CP]R[TV]YIG[ST]NPEK[IQ]ENG[PFR]TYFREL[VFD]dEKGTVD[DF]YFSV[RD]KWKNVHVKAT[QDD]G-T[V]VAD[IE]Q[N]VFK[V]SLSR-T[LV]AHNI[V]D[k]HGQTE[IT]ELFVK-LNVED[DL]E[K]W[L]TEDKG[IK]K[V]VNFlenenhphe-----</p> <p><b>Proposed:</b> aliSize=148 (resi) RMSD=1.89 (Å)<br/> vairnf-----D[SKT]S[EN]YSIFLAS[DV]K[E]E[EN]SMR[V]FVDV[IR]AL-DNSSL[YA]EYOT[VN]E[CT]E[FPM]VFD[TE]E[d]g[V]SLN[D]CY[N]VFR[SE]F[e]NDE[II]L[YL]V[N]F[K]-KDRPFO[LF]FYARE[PD]VSP[IK]E[EV]K[V]VOKRG[V]KENIIDLTKID-R[CFOL]Rg<br/> -----aqeeaeqNL[SEL]S[CP]R[TV]YIG[ST]NPEK[IQ]ENG[PFR]TYFREL[VFD]dEKGTVD[DF]YFSV[RD]KWKNVHVKAT[QDD]G-T[V]VAD[IE]Q[N]VFK[V]SL-SRT[LV]AHNI[V]D[k]HGQTE[IT]ELFVK-LNVED[DL]E[K]W[L]TEDKG[IK]K[V]VNFLENenHPHE--</p>  |
| 974 | N | 17.09 | <p><b>lew3A (159)</b></p> <p><b>TM-align:</b> aliSize=119 (resi) RMSD=2.66 (Å)<br/> vair-----N-FD[SKT]S[EN]YSIFLAS[DV]K[E]E[EN]SMR[V]FVDV[IR]AL-DNSSL[YA]EYOT[VN]E[CT]E[FPM]VFD[TE]E[d]g[V]SLN[D]CY[N]VFR[SE]F[e]NDE[II]L[YL]V[N]F[K]-KDRPFO[LF]FYARE[EP]dvspeikeefvkivqrgivkeniidltkidr-----nvededlekfwkltedkgidkknvvnflen<br/> ----qeeAeQNL[SEL]S[CP]R[TV]YIG[ST]NPEK[IQ]ENG[PFR]TYFREL[VFD]dEKGTVD[DF]YFSV[RD]KWKNVHVKAT[QDD]G-T[V]VAD[IE]Q[N]VFK[V]SL-SRT[LV]AHNI[V]D[k]HGQTE[IT]ELFVKL-----</p> <p>CFOLRg--<br/> ENHPH-pe</p> <p><b>SARST:</b> aliSize=146 (resi) RMSD=13.53 (Å)<br/> vai---RNFD[SKT]S[EN]YSIFLAS[DV]K[E]E[EN]SMR[V]FVDV[IR]AL-DNSSL[YA]EYOT[VN]E[CT]E[FPM]VFD[TE]E[d]g[V]SLN[D]CY[N]VFR[SE]F[e]NDE[II]L[YL]V[N]F[K]DRPFOL[FE]FYARE[PD]VSP[IK]E[EV]K[V]VOKRG[V]KENIIDLTKI-----drcfqlrg<br/> ---qeeAeQNL[SEL]S[CP]R[TV]YIG[ST]NPEK[IQ]ENG[PFR]TYFREL[VFD]dEKGTVD[DF]YFSV[RD]KWKNVHVKAT[QDD]G-T[V]VAD[IE]Q[N]VFK[V]SL-SRT[LV]AHNI[V]D[k]HGQTE[IT]ELFVKL-NVED[DL]E[K]W[L]TEDKG[IK]K[V]VNFLENenhphe-----</p> <p><b>BLAST:</b> aliSize=81 (resi) iden=25.32% (40/158) simi=51.27% (81/158)<br/> vairnf-----D[SKT]S[EN]YSIFLAS[DV]K[E]E[EN]SMR[V]FVDV[IR]AL-DNSSL[YA]EYOT[VN]E[CT]E[FPM]VFD[TE]E[d]g[V]SLN[D]CY[N]VFR[SE]F[e]NDE[II]L[YL]V[N]F[K]-DRPFOL[FE]FYARE[PD]VSP[IK]E[EV]K[V]VOKRG[V]KENIID-----ltkidrcfqlrg<br/> -----qeeaeqNL[SEL]S[CP]R[TV]YIG[ST]NPEK[IQ]ENG[PFR]TYFREL[VFD]dEKGTVD[DF]YFSV[RD]KWKNVHVKAT[QDD]G-T[V]VAD[IE]Q[N]VFK[V]SLSR-T[LV]AHNI[V]D[k]HGQTE[IT]ELFVK-LNVED[DL]E[K]W[L]TEDKG[IK]K[V]VNFlenenhphe-----</p> <p><b>Proposed:</b> aliSize=120 (resi) RMSD=1.83 (Å)<br/> VAIRNFD[SKT]S[EN]YSIFLAS[DV]K[E]E[EN]SMR[V]FVDV[IR]AL-DNSSL[YA]EYOT[VN]E[CT]E[FPM]VFD[TE]E[d]g[V]SLN[D]CY[N]VFR[SE]F[e]NDE[II]L[YL]V[N]F[K]-KDRPFO[LF]FYARE-----pdvspeikeefvkivqrgivkeniidltkidrcfqlRG-<br/> QEEAEQNL[SEL]S[CP]R[TV]YIG[ST]NPEK[IQ]ENG[PFR]TYFREL[VFD]dEKGTVD[DF]YFSV[RD]KWKNVHVKAT[QDD]G-T[V]VAD[IE]Q[N]VFK[V]SL-SRT[LV]AHNI[V]D[k]HGQTE[IT]ELFVKLnvededlekfwkltedkgidkknvvnf-----LEn</p> <p>-----<br/> enhphe</p>   |

|     |                                               |   |       |                                                                                                                                                                                                                                                                                                                                                                                                                                                                                                                                                                                                                                                                                                                                                                                                                                                                                                                                                                                                                                                                                                                                                                                                                                                                                                                                                                                                                                                                                                                                                                                                                                                                                                                                                                                                                                                                                                                                                                                                                                        |
|-----|-----------------------------------------------|---|-------|----------------------------------------------------------------------------------------------------------------------------------------------------------------------------------------------------------------------------------------------------------------------------------------------------------------------------------------------------------------------------------------------------------------------------------------------------------------------------------------------------------------------------------------------------------------------------------------------------------------------------------------------------------------------------------------------------------------------------------------------------------------------------------------------------------------------------------------------------------------------------------------------------------------------------------------------------------------------------------------------------------------------------------------------------------------------------------------------------------------------------------------------------------------------------------------------------------------------------------------------------------------------------------------------------------------------------------------------------------------------------------------------------------------------------------------------------------------------------------------------------------------------------------------------------------------------------------------------------------------------------------------------------------------------------------------------------------------------------------------------------------------------------------------------------------------------------------------------------------------------------------------------------------------------------------------------------------------------------------------------------------------------------------------|
| 975 | <p>lew3A<br/>(159)</p> <p>1gt1A<br/>(158)</p> | C | 22.78 | <p><b>TM-align:</b> aliSize=119 (resi) RMSD=2.66 (Å)<br/> vai-----N-FDI SKI SCEN YSTIFLAS DVK EK TEENG SMRVFVDVIRAL--DNSSL YAEYOTVNVN ECTEFPMVFDI TEEDg V SLN YDQY NVFR I SEFeNDE I I L Y L V N F K -KDRPFOL FEFYA R E P D V S P I K E E V K I V O K R G I V K E N I I D L T K I -----drcfqlrg<br/> -----qeeeaEQNLSELSCPVRTVYIGSTNPEKIQENGPFRITYFREL VFDdEKGTVDYFYSVVRDQKWKNVHVKATIQDDG-TVADYEQNVFKVSL-SRTLVAHNI NVK HGQTTEL TELFVKL-----nvededlekfwkltedkgidkknvvnflen</p> <p>CFOLrg--<br/> ENHPH-pe</p> <p><b>SARST:</b> aliSize=146 (resi) RMSD=13.53 (Å)<br/> vai-----RNFDI SKI SCEN YSTIFLAS DVK EK TEENG SMRVFVDVIRAL--DNSSL YAEYOTVNVN ECTEFPMVFDI TEEDg V SLN YDQY NVFR I SEFeNDE I I L Y L V N F K -DRPFOL FEFYA R E P D V S P I K E E V K I V O K R G I V K E N I I D L T K I -----drcfqlrg<br/> -----qeeeaEQNLSELSCPVRTVYIGSTNPEKIQENGPFRITYFREL VFDdEKGTVDYFYSVVRDQKWKNVHVKATIQDDG-TVADYEQNVFKVSL-SRTLVAHNI NVK HGQTTEL TELFVKL NVEDDL EKFWL TEDKGIDKKNVVNFLENenhphe-----</p> <p><b>BLAST:</b> aliSize=81 (resi) iden=25.32% (40/158) simi=51.27% (81/158)<br/> vairnf-----DI SKI SCEN YSTIFLAS DVK EK TEENG SMRVFVDVIRAL--DNSSL YAEYOTVNVN ECTEFPMVFDI TEEDg V SLN YDQY NVFR I SEFeNDE I I L Y L V N F K -DRPFOL FEFYA R E P D V S P I K E E V K I V O K R G I V K E N I I D L T K I -----ltkidrcfqlrg<br/> -----qeeeaEQNLSELSCPVRTVYIGSTNPEKIQENGPFRITYFREL VFDdEKGTVDYFYSVVRDQKWKNVHVKATIQDDG-TVADYEQNVFKVSLSR-TLVAHNI NVK HGQTTEL TELFVK-LNVEDDL EKFWL TEDKGIDKKNVVNFLENenhphe-----</p> <p><b>Proposed:</b> aliSize=148 (resi) RMSD=1.89 (Å)<br/> vairnf-----DI SKI SCEN YSTIFLAS DVK EK TEENG SMRVFVDVIRAL--DNSSL YAEYOTVNVN ECTEFPMVFDI TEEDg V SLN YDQY NVFR I SEFeNDE I I L Y L V N F K -KDRPFOL FEFYA R E P D V S P I K E E V K I V O K R G I V K E N I I D L T K I D -RCFOLrg<br/> -----qeeeaEQNLSELSCPVRTVYIGSTNPEKIQENGPFRITYFREL VFDdEKGTVDYFYSVVRDQKWKNVHVKATIQDDG-TVADYEQNVFKVSL-SRTLVAHNI NVK HGQTTEL TELFVK-LNVEDDL EKFWL TEDKGIDKKNVVNFLENenHPHPE--</p>                                                  |
| 976 | <p>2a2uA<br/>(158)</p> <p>1pboB<br/>(151)</p> | C | 26.49 | <p><b>TM-align:</b> aliSize=114 (resi) RMSD=1.64 (Å)<br/> eeasstrgnl DVAKI NQDFSTIVVANKREK TEENG SMRVFMOHIDVL--ENSLG K R I K E N E C R E L Y L V Y T P E d E E F V E Y D G N T I I L K T D Y d R Y V M F L I N F K -N G E T F O L M V Y G R T K d I s s d i k e k f a k l c e a h g i t r d n i d l t k -----<br/> -----NLSELSCPVRTVYIGSTNPEKIQENGPFRITYFREL VFDdEKGTVDYFYSVVRDQKWKNVHVKATIQDDG-TVADYEQNVFKVSLSR-TLVAHNI NVK HGQTTEL TGFVKL-----nvededlekfwkltedkgidkknvvnflenedhp</p> <p>TDRcl<br/> HPE--</p> <p><b>SARST:</b> aliSize=138 (resi) RMSD=13.67 (Å)<br/> eeasstrgnldv--AKI NQDFSTIVVANKREK TEENG SMRVFMOHIDVL--ENSLG K R I K E N E C R E L Y L V Y T P E d E E F V E Y D G N T I I L K T D Y D R Y V M F L I N F K -N G E T F O L M V Y G R T K D L S S D I K E K F A K I C E A H G I T R D N I I D L T -----ktdrc1<br/> -----nlSELSCPVRTVYIGSTNPEKIQENGPFRITYFREL VFDdEKGTVDYFYSVVRDQKWKNVHVKATIQDDG-TVADYEQNVFKVSLSR-TLVAHNI NVK HGQTTEL TGFVKL NVEDDL EKFWL TEDKGIDKKNVVNFLENedhphe-----</p> <p><b>BLAST:</b> aliSize=82 (resi) iden=29.14% (44/151) simi=54.30% (82/151)<br/> eeasstrgnl DVAKI NQDFSTIVVANKREK TEENG SMRVFMOHIDVL--ENSLG K R I K E N E C R E L Y L V Y T P E d E E F V E Y D G N T I I L K T D Y D R Y V M F L I N F K -N G E T F O L M V Y G R T K D L S S D I K E K F A K I C E A H G I T R D N I I D L T K T D -----rcl<br/> -----NLSELSCPVRTVYIGSTNPEKIQENGPFRITYFREL VFDdEKGTVDYFYSVVRDQKWKNVHVKATIQDDG-TVADYEQNVFKVSLSR-TLVAHNI NVK HGQTTEL TGFVKL NVEDDL EKFWL TEDKGIDKKNVVNFLENedhphe-----</p> <p><b>Proposed:</b> aliSize=144 (resi) RMSD=1.47 (Å)<br/> eeasstrgnl DVAKI NQDFSTIVVANKREK TEENG SMRVFMOHIDVL--ENSLG K R I K E N E C R E L Y L V Y T P E d E E F V E Y D G N T I I L K T D Y d R Y V M F L I N F K -N G E T F O L M V Y G R T K d L S S D I K E K F A K I C E A H G I T R D N I I D L T K T D -RCL--<br/> -----NLSELSCPVRTVYIGSTNPEKIQENGPFRITYFREL VFDdEKGTVDYFYSVVRDQKWKNVHVKATIQDDG-TVADYEQNVFKVSLSR-TLVAHNI NVK HGQTTEL TGFVKL-LNVEDDL EKFWL TEDKGIDKKNVVNFLENedHPHpe</p> |
| 977 | <p>1hcfX<br/>(101)</p> <p>1he7A<br/>(107)</p> | N | 45.54 | <p><b>TM-align:</b> aliSize=85 (resi) RMSD=2.04 (Å)<br/> shmaptitflespts-----DHHWCIPFTIKNKPKALQWFYNGAILNESKYI CTKIHVNTN--HTEYHGCLQLDNPTHMNGDYTLI I KNEYKDEKQI SAHFMGWg-----<br/> -----shmpasvqlhtaveMHHWCIPFSIDQAPASLRNLFNGSVLNETSFI FEFLEPAAnEIVRHGCLRINOPHTVNNQNYTLIAANPFQASASIMAAFMdNf-fefnpe</p> <p><b>SARST:</b> aliSize=93 (resi) RMSD=15.54 (Å)<br/> s--MAPTI tFLESPTS DHHWCIPFTIKNKPKALQWFYNGAILNESKYI CTKIHVNTN--HTEYHGCLQLDNPTHMNGDYTLI I KNEYKDEKQI SAHFMGWg-----fmgwpg<br/> --shmpasv-QHTAVEMHHWCIPFSIDQAPASLRNLFNGSVLNETSFI FEFLEPAAnEIVRHGCLRINOPHTVNNQNYTLIAANPFQASASIMAAFMdnpfefnpe-----</p> <p><b>BLAST:</b> aliSize=66 (resi) iden=48.51% (49/101) simi=65.35% (66/101)<br/> SHMaPTI tFLESPTS DHHWCIPFTIKNKPKALQWFYNGAILNESKYI CTKI--HVTNHTEYHGCLQLDNPTHMNGDYTLI I KNEYKDEKQI SAHFMGWg-----g<br/> SHM-PASVQHTAVEMHHWCIPFSIDQAPASLRNLFNGSVLNETSFI FEFLePAAnEIVRHGCLRINOPHTVNNQNYTLIAANPFQASASIMAAFMdNf-fefnpe-</p> <p><b>Proposed:</b> aliSize=97 (resi) RMSD=1.29 (Å)<br/> SHMaPTI tFLESPTS DHHWCIPFTIKNKPKALQWFYNGAILNESKYI CTKIHVNTN--HTEYHGCLQLDNPTHMNGDYTLI I KNEYKDEKQI SAHFMGWg-----wpg<br/> SHMPASV-QHTAVEMHHWCIPFSIDQAPASLRNLFNGSVLNETSFI FEFLEPAAnEIVRHGCLRINOPHTVNNQNYTLIAANPFQASASIMAAFMdNpfefnpe-----</p>                                                                                                                                                                                                                                                                                                                                                                                                                                                                                                                                                                                                                                                                                                                                                                                                |

|     |                |   |       |                                                                                                                                                                                                                                                                                                                                                                                                                                                                                                                                                                                                                                                                                                                                                                                                                                                                                                                                                                                                                                                                                                                                                                                                                                                                                                                                        |
|-----|----------------|---|-------|----------------------------------------------------------------------------------------------------------------------------------------------------------------------------------------------------------------------------------------------------------------------------------------------------------------------------------------------------------------------------------------------------------------------------------------------------------------------------------------------------------------------------------------------------------------------------------------------------------------------------------------------------------------------------------------------------------------------------------------------------------------------------------------------------------------------------------------------------------------------------------------------------------------------------------------------------------------------------------------------------------------------------------------------------------------------------------------------------------------------------------------------------------------------------------------------------------------------------------------------------------------------------------------------------------------------------------------|
| 978 | 1fhgA<br>(102) | N | 14.71 | <p><b>TM-align:</b> aliSize=80 (resi) RMSD=1.88 (Å)<br/> aekphvkpyfktkilDmevve-----GSAARFDCKVEYFDPEVMWFKDDNPVKE SRHFQIDY-DE-----EGNCSITISEVCGDDDAKYCKAVNSLGEATCTAELLVETM-----<br/> -----shmpasvqlhtaveMHWCI PFSVDCQAPSLRRLFNGLSVLNETSFI FTEFL EPaanetVRHGCRNLNQP THVNNNGNYLLAANPFGQASAS IMAAFMDNpfe fnpe</p> <p><b>SARST:</b> aliSize=89 (resi) RMSD=14.98 (Å)<br/> aekph--VKPYFtktILDMEVVEgSAARFDCKVEYFDPEVMWFKDDNPVKE SRHFQIDY--DEEGN----CSITISEVCGDDDAKYCKAVNSLGEATCTAELLV-----etm<br/> -----shMPASV--QLHTAVEMH--HWCIPFSVDCQAPSLRRLFNGLSVLNETSFI FTEFL EPaanetv rhGCRNLNQP THVNNNGNYLLAANPFGQASAS IMAAFmdnpfe fnpe---</p> <p><b>BLAST:</b> aliSize=31 (resi) iden=14.71% (15/102) simi=30.39% (31/102)<br/> aekphvkpyfktkilDmevvegsaarfdck-----VEYFDPEVMWFKDDNPVKE SRHFQIDYDEEG-----NCsITISEVCGDDDAKYCKAVNSLGEATCT-----aellvetm<br/> -----shmpasvqlhtaveMhwci pfsVDCQAPSLRRLFNGLSVLNETSFI FTEFL EPaanetv rhGCRNLNQP THVNNNGNYLLAANPFGQASAS imaa fmdnpfe fnpe-----</p> <p><b>Proposed:</b> aliSize=94 (resi) RMSD=1.99 (Å)<br/> aeEKPHVkpPYFTKILDMEVVEgSAARFDCKVEYFDPEVMWFKDDNPVKE SRHFQIDY-DE-----EGNCSITISEVCGDDDAKYCKAVNSLGEATCTAELLVETM-----<br/> --SHMPA--SVQLHTAVEMH----HWCIPFSVDCQAPSLRRLFNGLSVLNETSFI FTEFL EPaanetVRHGCRNLNQP THVNNNGNYLLAANPFGQASAS IMAAFMDNpfe fnpe</p>                                                   |
| 979 | 2dm3A<br>(110) | N | 18.69 | <p><b>TM-align:</b> aliSize=82 (resi) RMSD=2.05 (Å)<br/> gssgsgfrphflqapgdltVqg-----GKLCRMDCKVSLFTPDLSWQLDGKPVVRPDAHKMLV-RE-----NGVHSITIEPVT SRDAGIYTCIATIRAGONSFSLELVVAAKESgps sg-----<br/> -----shmpasvqlhtaveMHWCI PFSVDCQAPSLRRLFNGLSVLNETSFI FTEFL EPaanetVRHGCRNLNQP THVNNNGNYLLAANPFGQASAS IMAAFMDNPF-----efnpe</p> <p><b>SARST:</b> aliSize=91 (resi) RMSD=13.07 (Å)<br/> gssgsgfrphfl-QAFGDLTVQEGKLCRMDK---KVSLEFTPDLSWQLDGKPVVRPDA--HKMLVRENGV---HSITIEPVT SRDAGIYTCIATIRAGONSFSLELVVAAKE-----sgps sg<br/> -----shMPASVQLHTAVEMHHCIPFSVDCQAPSLRRLFNGLSVLNETSFI FTEFL EPaanetv rhGCRNLNQP THVNNNGNYLLAANPFGQASAS IMAAFMDNPFefnpe-----</p> <p><b>BLAST:</b> aliSize=29 (resi) iden=19.63% (21/107) simi=27.10% (29/107)<br/> gssgsgfrphflqapgdltVqegkLCrmdck-----VSLFTPDLSWQLDGKPVVRPDA--HKMLV---VRENGVHSLI-IEPVT SRDAGIYTCIATIRAGONSFSL-----elvvaakesgps sg<br/> -----shmpasvqlhtaveMhwci pfsVDCQAPSLRRLFNGLSVLNETSFI FTEFL EpaanetVRHGCRNLNQP THVNNNGNYLLAANPFGQASAS Imaa fmdnpfe fnpe-----</p> <p><b>Proposed:</b> aliSize=95 (resi) RMSD=1.90 (Å)<br/> gssgsgFRPHFlqAPGDLTVQegKLCRMDCKVSLFTPDLSWQLDGKPVVRPDAHKMLV-RE-----NGVHSITIEPVT SRDAGIYTCIATIRAGONSFSLELVVAAK-eS-----gps sg<br/> -----SHMPASV--QLHTAVEMH--HWCIPFSVDCQAPSLRRLFNGLSVLNETSFI FTEFL EPaanetVRHGCRNLNQP THVNNNGNYLLAANPFGQASAS IMAAFMDNp-Fe fnpe-----</p> |
| 980 | 1glcA<br>(98)  | N | 17.35 | <p><b>TM-align:</b> aliSize=80 (resi) RMSD=1.63 (Å)<br/> smeapki feriqstvgq-----GSDAHRVVRVVKFDPECEWYKNGVK IERSDRYIYWYWPED-----NVCEIVTRDVTGEDSASIMVKAINIAGETSSHAFLLVQAK-----<br/> -----shmpasvqlhtaveMHWCI PFSVDCQAPSLRRLFNGLSVLNETSFI FTEFL EPaanetVRHGCRNLNQP THVNNNGNYLLAANPFGQASAS IMAAFMDNpfe fnpe</p> <p><b>SARST:</b> aliSize=87 (resi) RMSD=12.43 (Å)<br/> smeapki f--ERIQSITVQ--GSDAHRVVRVVKFDPECEWYKNGVK IERSDRYIYWY----PDNVC-ETVTRDVTGEDSASIMVKAINIAGETSSHAFLLV-----qak<br/> -----shMPASVQLHTAVEMHHCIPFSVDCQAPSLRRLFNGLSVLNETSFI FTEFL Epaanetv rhGCRNLNQP THVNNNGNYLLAANPFGQASAS IMAAFmdnpfe fnpe---</p> <p><b>BLAST:</b> aliSize=16 (resi) iden=11.22% (11/98) simi=16.33% (16/98)<br/> smeapki feriqstvgqgsdahfrvr-----VVKFDPECEWYKNGVK IERSDRYIYWYWPEDNVCEIV-----irdvtgedsasimvkainiagetsshafllvqak<br/> -----shmpasvqlhtaveMhwci pfsVDCQAPSLRRLFNGLSVLNETSFI FTEFL Epaanetv rhgcl rlnqpthvnnngnyllaanpfgqasas imaa fmdnpfe fnpe-----</p> <p><b>Proposed:</b> aliSize=94 (resi) RMSD=1.75 (Å)<br/> smEAPKIfeRIQSITVQGS DAHRVVRVVKFDPECEWYKNGVK IERSDRYIYWYWPED-----NVCEIVTRDVTGEDSASIMVKAINIAGETSSHAFLLVQAK-----<br/> --SHMPA--SVQLHTAVEMHHCIPFSVDCQAPSLRRLFNGLSVLNETSFI FTEFL EPaanetVRHGCRNLNQP THVNNNGNYLLAANPFGQASAS IMAAFMDNpfe fnpe</p>                                                                            |

|     |                                             |   |       |                                                                                                                                                                                                                                                                                                                                                                                                                                                                                                                                                                                                                                                                                                                                                                                                                                                                                                                                                                                                                                                                                                                                                                                                                                                                                                                                                                                                                                                                                                                                                                                                                                                                                                                                                                                                                                                                                                              |
|-----|---------------------------------------------|---|-------|--------------------------------------------------------------------------------------------------------------------------------------------------------------------------------------------------------------------------------------------------------------------------------------------------------------------------------------------------------------------------------------------------------------------------------------------------------------------------------------------------------------------------------------------------------------------------------------------------------------------------------------------------------------------------------------------------------------------------------------------------------------------------------------------------------------------------------------------------------------------------------------------------------------------------------------------------------------------------------------------------------------------------------------------------------------------------------------------------------------------------------------------------------------------------------------------------------------------------------------------------------------------------------------------------------------------------------------------------------------------------------------------------------------------------------------------------------------------------------------------------------------------------------------------------------------------------------------------------------------------------------------------------------------------------------------------------------------------------------------------------------------------------------------------------------------------------------------------------------------------------------------------------------------|
| 981 | <p>1u2hA (96)</p> <hr/> <p>1he7A (107)</p>  | N | 19.79 | <p><b>TM-align:</b> aliSize=79 (resi) RMSD=1.40 (Å)<br/> kapptfkvs lmdqsvre-----GQDVIMSTRVQCEPKVVSRLRROPVVRPDORRAEAE-E-----GGLCRRLILAAERGDALFYTCCKAVNEYARQCEARLEVR-G-----<br/> -----shmpasvqlhtaveMHWCIPEFSDCOAPSLRVLFGSVLNETSFIFTEFLPaanetVRHGCLRLNQPTHVNNNYLLAANPFGQASASIMAAFMDNpfefnpe</p> <p><b>SARST:</b> aliSize=79 (resi) RMSD=15.38 (Å)<br/> kapptfk--VSLMDQSVREGOQDVIMSTRVQCEPKVVSRLRROPVVRPDORRAEAE--GGL---CRLILAAERGDALFYTCCKAVN-----EYGAR--qclearlevrg<br/> -----shMPASVQLHTAVEMHWCIPFSVDCOAPSLRVLFGSVLNETSFIFTEFLPaANETvrhGCLRLNQPTHVNNNYLLAANPFGQASASIMAAFMDNPFEPNpe-----</p> <p><b>BLAST:</b> aliSize=25 (resi) iden=19.79% (19/96) simi=26.04% (25/96)<br/> kapptfkvs lmdqsvreGQdvimsir-----VQCEPKVVSRLRROPVVRPDORRAEAEEGGLCR---LILAAERGDALFYTCCKAVNEYG-----arqclearlevrg<br/> -----shmpasvqlhtavemhwcipfsVDCOAPSLRVLFGSVLNETSFIFTEFLPaANETvrhGCLRLNQPTHVNNNYLLAANPFGQASASIMAAFMDNPFEPNpe-----</p> <p><b>Proposed:</b> aliSize=92 (resi) RMSD=1.46 (Å)<br/> kApPTF-kvSLMDQSVREGOQDVIMSTRVQCEPKVVSRLRROPVVRPDORRAEAE-EG-----GLCRRLILAAERGDALFYTCCKAVNEYARQCEARLEVR-G-----<br/> -S-HMPa--SVQLHTAVEMHWCIPFSVDCOAPSLRVLFGSVLNETSFIFTEFLPaanetVRHGCLRLNQPTHVNNNYLLAANPFGQASASIMAAFMDNpfefnpe</p>                                                                                                                                                                                                                                                                                                                                                                                                                                                                                                                                                                                                                                                                                                  |
| 982 | <p>2a5mA (177)</p> <hr/> <p>1ytqA (181)</p> | C | 33.90 | <p><b>TM-align:</b> aliSize=90 (resi) RMSD=1.66 (Å)<br/> sktGGKISFYEDRNEOCRRYDCDCDADFRSY-LSRCNSIRVEGTTAVYERPNSFSHMYILPOGEYPEYORWGL-L-NDRIGSCRAVHLSGGQAKIQVFekgdfngqmyettedcpsimeqfhlreihsckvvegwti fyelpnyrgrylldkkeyrkpvdwgaaspaiqsfrive-----<br/> --LNPkIIIFEQENFOGHSHELNGP-PNLKETgVEKAGSVLQACPNVGYEQANCKGEQVFVEKGEYPRWDSWTSsRrTDSLSSLRPIKVDsQEH-----kiilyenpnf</p> <p>-----<br/> tgkkmeiiddvpsfhahgyqekvsrvrqsgtwvgyqpygrlqyllkgykdsdfgaphpqvqsvrri rdmqw</p> <p><b>SARST:</b> aliSize=170 (resi) RMSD=15.72 (Å)<br/> skt-GGKISFYEDRNEOCRRYDCDCDADFRSY-LSRCNSIRVEGTTAVYERPNSFSHMYILPOGEYPEYORWGL-L-NDRIGSCRAVHLSGGQAKIQVFekgdfngom-YETTEDCPSIMEqFHLRE-IHCKVVEGTWIFVELPNYRGROYLLDKKEYRKPVWGAASAIOSFRRI-----ve<br/> ---LNPkIIIFEQENFOGHSHELNGP-PNLKETgVEKAGSVLQACPNVGYEQANCKGEQVFVEKGEYPRWDSWTSsRRTDSLSSLRPIKVDsQEHKIIILYENPNFTGKKMEIIDDVPSFHA-HGYQEKVSVRQSGTWVGYQYGYRGLDYLLKGDYKDSDFGAPHQVOSVRRIRdmqw--</p> <p><b>BLAST:</b> aliSize=94 (resi) iden=34.46% (61/177) simi=53.11% (94/177)<br/> sktgg---KISFYEDRNEOCRRYDCDCDADFRSY-LSRCNSIRVEGTTAVYERPNSFSHMYILPOGEYPEYORWGL-L-NDRIGSCRAVHLSGGQAKIQVFekgdfngomyf-TTTCPSIMEOFHLREIHSCKVVEGTWIFVELPNYRGROYLLDKKEYRKPVWGAASAIOSFRRI-----ve<br/> -----lnpkIIIFEQENFOGHSHELNGP-PNLKETgVEKAGSVLQACPNVGYEQANCKGEQVFVEKGEYPRWDSWTSsRrTDSLSSLRPIKVDsQEHKIIILYENPNFTGKKMEIIDDVPSFHAHGYQEKVSVRQSGTWVGYQYGYRGLDYLLKGDYKDSDFGAPHQVOSVRRIRdmqw--</p> <p><b>Proposed:</b> aliSize=174 (resi) RMSD=1.42 (Å)<br/> sktGGKISFYEDRNEOCRRYDCDCDADFRSY-LSRCNSIRVEGTTAVYERPNSFSHMYILPOGEYPEYORWGL-L-NDRIGSCRAVHLSGGQAKIQVFekgdfngomyf-TTTCPSIMEOFHLREIHSCKVVEGTWIFVELPNYRGROYLLDKKEYRKPVWGAASAIOSFRRIIVE---<br/> --LNPkIIIFEQENFOGHSHELNGP-PNLKETgVEKAGSVLQACPNVGYEQANCKGEQVFVEKGEYPRWDSWTSsRrTDSLSSLRPIKVDsQEHKIIILYENPNFTGKKMEIIDDVPSFHAHGYQEKVSVRQSGTWVGYQYGYRGLDYLLKGDYKDSDFGAPHQVOSVRRIRdmqw</p>                                                                               |
| 983 | <p>2a5mA (177)</p> <hr/> <p>2bb2A (181)</p> | C | 33.90 | <p><b>TM-align:</b> aliSize=89 (resi) RMSD=1.56 (Å)<br/> s-----KTGGKISFYEDRNEOCRRYDCDCDADFRSY-LSRCNSIRVEGTTAVYERPNSFSHMYILPOGEYPEYORWGL-L-NDRIGSCRAVHLSGGQAKIQVFekgdfngqmyettedcpsimeqfhlreihsckvvegwti fyelpnyrgrylldkkeyrkpvdwgaaspaiqsfrive-----<br/> --LnpkiiifeqenfghshelngpcpnlketgvekagsvlvqagpwwgyeqanckgeqvfvekyprwdsWTSsRrTDSLSSLRPIKVDsQEHKIIILYENPNFTGKKMEIIDDVPSFHAHGYQEKVSVRQSGTWVGYQYGYRGLDYLLKGDYKDSDFGAPHQVOSVRRIRDM-----</p> <p>-----<br/> ekgdfngqmyettedcpsimeqfhlreihsckvvegwti fyelpnyrgrylldkkeyrkpvdwgaaspaiqsfrive</p> <p><b>SARST:</b> aliSize=169 (resi) RMSD=16.17 (Å)<br/> skt-GGKISFYEDRNEOCRRYDCDCDADFRSY-LSRCNSIRVEGTTAVYERPNSFSHMYILPOGEYPEYORWGL-L-NDRIGSCRAVHLSGGQAKIQVFekgdfngomyf-TTTCPSIMEOFHLREIHSCKVVEGTWIFVELPNYRGROYLLDKKEYRKPVWGAASAIOSFRRI-----ve<br/> ---LNPkIIIFEQENFOGHSHELNGP-PNLKETgVEKAGSVLQACPNVGYEQANCKGEQVFVEKGEYPRWDSWTSsRRTDSLSSLRPIKVDsQEHKIIILYENPNFTGKKMEIIDDVPSFHA-HGYQEKVSVRQSGTWVGYQYGYRGLDYLLKGDYKDSDFGAPHQVOSVRRIRdmqw--</p> <p><b>BLAST:</b> aliSize=94 (resi) iden=34.46% (61/177) simi=53.11% (94/177)<br/> sktgg---KISFYEDRNEOCRRYDCDCDADFRSY-LSRCNSIRVEGTTAVYERPNSFSHMYILPOGEYPEYORWGL-L-NDRIGSCRAVHLSGGQAKIQVFekgdfngomyf-TTTCPSIMEOFHLREIHSCKVVEGTWIFVELPNYRGROYLLDKKEYRKPVWGAASAIOSFRRI-----ve<br/> -----lnpkIIIFEQENFOGHSHELNGP-PNLKETgVEKAGSVLQACPNVGYEQANCKGEQVFVEKGEYPRWDSWTSsRrTDSLSSLRPIKVDsQEHKIIILYENPNFTGKKMEIIDDVPSFHAHGYQEKVSVRQSGTWVGYQYGYRGLDYLLKGDYKDSDFGAPHQVOSVRRIRdmqw--</p> <p><b>Proposed:</b> aliSize=174 (resi) RMSD=1.43 (Å)<br/> sktGGKISFYEDRNEOCRRYDCDCDADFRSY-LSRCNSIRVEGTTAVYERPNSFSHMYILPOGEYPEYORWGL-L-NDRIGSCRAVHLSGGQAKIQVFekgdfngomyf-TTTCPSIMEOFHLREIHSCKVVEGTWIFVELPNYRGROYLLDKKEYRKPVWGAASAIOSFRRIIVE---<br/> --LNPkIIIFEQENFOGHSHELNGP-PNLKETgVEKAGSVLQACPNVGYEQANCKGEQVFVEKGEYPRWDSWTSsRrTDSLSSLRPIKVDsQEHKIIILYENPNFTGKKMEIIDDVPSFHAHGYQEKVSVRQSGTWVGYQYGYRGLDYLLKGDYKDSDFGAPHQVOSVRRIRdmqw</p> |



|     |   |       |                                                                                                                                                                                                                                                                                                                                                                                                                                                                                                                                                                                                                                                                                                                                                                                                                                                                                                                                                                                                                                                                                                                                                                                                                                                                                                                                                                                                                                                                                                                                                                                                                                                                                                                                                                                                        |
|-----|---|-------|--------------------------------------------------------------------------------------------------------------------------------------------------------------------------------------------------------------------------------------------------------------------------------------------------------------------------------------------------------------------------------------------------------------------------------------------------------------------------------------------------------------------------------------------------------------------------------------------------------------------------------------------------------------------------------------------------------------------------------------------------------------------------------------------------------------------------------------------------------------------------------------------------------------------------------------------------------------------------------------------------------------------------------------------------------------------------------------------------------------------------------------------------------------------------------------------------------------------------------------------------------------------------------------------------------------------------------------------------------------------------------------------------------------------------------------------------------------------------------------------------------------------------------------------------------------------------------------------------------------------------------------------------------------------------------------------------------------------------------------------------------------------------------------------------------|
| 984 | C | 35.26 | <p><b>1a45A (173)</b></p> <p>TM-align: aliSize=87 (resi) RMSD=1.72 (Å)<br/> --GKTFYEDRGFOGRHYECSSDHSNLOPY-FSRCNSIRSDSCWMLYERPNOYHOYFLRRDYDYOOVMG-L-NDSIRSCRLPHTGSHRLRIVEREDYRGAMVEITEDCSSLHDFHFSEIHSFNVLGWWLVEMTNVGRVLLRPGDYRRVHDWGATNARVGLRRVDFV-----<br/> lnPKIIFEQENFOGHSHLNGPCPNLKETgVEKAGSVLQAQPNVGYEQANCKGEQVFVEKGEYPRWDSVTSsRrTDSLSLPLKVDsQE-----hkiilyenpnft</p> <p>gkkmeiiddvpsfhahgyqekvsvrvqsgtwvgyqygyrglqyllkgydkdssdfgaphpqvsvrri rdmqw</p> <p><b>1ytqA (181)</b></p> <p>SARST: aliSize=167 (resi) RMSD=15.88 (Å)<br/> g---KTFYEDRGFOGRHYECSSDHSNLOPY-FSRCNSIRSDSCWMLYERPNOYHOYFLRRDYDYOOVMG--MGLNDSIRSCRLPHTGSHRLR-IVYREDYRQOMVEI-TEDCSSLHDFHFSEIHSFNVLGWWLVEMTNVGRVLLRPGDYRRYHWGATNARVGLRRVDFV-----vdly<br/> -lnPKIIFEQENFOGHSHLNGPCPNLKETgVEKAGSVLQAQPNVGYEQANCKGEQVFVEKGEYPRWDSVTSsRRTDLSLPLKVDsQEHKIILYENPNFTKKMEVIdDDVPSFHAHGYQEKVSVRVQSGTWVGYQYGYRGLDYLLLEKGDYKDSGDFGAPQPOVQSVRRIRdmqw----</p> <p>BLAST: aliSize=93 (resi) iden=35.26% (61/173) simi=53.76% (93/173)<br/> g---KTFYEDRGFOGRHYECSSDHSNLOPY-FSRCNSIRSDSCWMLYERPNOYHOYFLRRDYDYOOVMG--LNDSTRSCRLPHTGSHRLRIVYREDYRQOMVEI-TEDCSSLHDFHFSEIHSFNVLGWWLVEMTNVGRVLLRPGDYRRYHWGATNARVGLRRVDFV-----fy<br/> -lnPKIIFEQENFOGHSHLNGPCPNLKETgVEKAGSVLQAQPNVGYEQANCKGEQVFVEKGEYPRWDSVTSsRrTDSLSLPLKVDsQEHKIILYENPNFTKKMEVIdDDVPSFHAHGYQEKVSVRVQSGTWVGYQYGYRGLDYLLLEKGDYKDSGDFGAPQPOVQSVRRIRdmqw--</p> <p>Proposed: aliSize=170 (resi) RMSD=1.51 (Å)<br/> --GKTFYEDRGFOGRHYECSSDHSNLOPY-FSRCNSIRSDSCWMLYERPNOYHOYFLRRDYDYOOVMG-L-NDSIRSCRLPHT-GSHRLRIVEREDYRQOMVEI-TEDCSSLHDFHFSEIHSFNVLGWWLVEMTNVGRVLLRPGDYRRYHWGATNARVGLRRVDFV-----fy<br/> lnPKIIFEQENFOGHSHLNGPCPNLKETgVEKAGSVLQAQPNVGYEQANCKGEQVFVEKGEYPRWDSVTSsRrTDSLSLPLKVDsQEHKIILYENPNFTKKMEVIdDDVPSFHAHGYQEKVSVRVQSGTWVGYQYGYRGLDYLLLEKGDYKDSGDFGAPQPOVQSVRRIRdmqw--</p>     |
| 985 | N | 35.84 | <p><b>2v2uA (173)</b></p> <p>TM-align: aliSize=86 (resi) RMSD=1.00 (Å)<br/> -----GKTFEDRSFOGRHYECSSDHSNLOPY-FSRCNSIRSDSCWMLYERPNOYHOYFLRRDYDYOOVMGFDSDSTRSCRLPHAGSHRLRlye<br/> lnpkiiifeqenfqgshelngpcpnlketgvekagsvlvqagpwgyeqanckgeqvfekgeyprwdsstssrrtdslslrpikvdsqehkiilyenpnftkkmevidddvpsfahgyqekvsvrvqsgtwvgyqygyrGLDYLLLEKGDYKDSGDFGAPQPOVQSVRRIRdmqw-----</p> <p>dhkgvmmelsedcsciqrhflsevrslqvlegcwlyempnyrgrqyllrpqeyrrfdqdgsvdakagslrrvdly</p> <p><b>2bb2A (181)</b></p> <p>SARST: aliSize=167 (resi) RMSD=16.38 (Å)<br/> g---KTFEDRSFOGRHYECSSDHSNLOPY-FSRCNSIRSDSCWMLYERPNOYHOYFLRRDYDYOOVMG--MgFSDSTRSCRLPHAGSHRMRVYKEDHKVMMLSEI-CSCIODRFHLSEVRSLOVLECWVLYEMTNVGRVLLRPOEYRRFQVWGSVDAKAGSLRRVDFV-----vdly<br/> -lnPKIIFEQENFOGHSHLNGPCPNLKETgVEKAGSVLQAQPNVGYEQANCKGEQVFVEKGEYPRWDSVTSsRrTDSLSLPLKVDsQEHKIILYENPNFTKKMEVIdDDVPSFHAHGYQEKVSVRVQSGTWVGYQYGYRGLDYLLLEKGDYKDSGDFGAPQPOVQSVRRIRdmqw----</p> <p>BLAST: aliSize=96 (resi) iden=36.42% (63/173) simi=55.49% (96/173)<br/> g---KTFEDRSFOGRHYECSSDHSNLOPY-FSRCNSIRSDSCWMLYERPNOYHOYFLRRDYDYOOVMG--SDSTRSCRLPHAGSHRMRVYKEDHKVMMLSEI-CSCIODRFHLSEVRSLOVLECWVLYEMTNVGRVLLRPOEYRRFQVWGSVDAKAGSLRRVDFV-----y<br/> -lnPKIIFEQENFOGHSHLNGPCPNLKETgVEKAGSVLQAQPNVGYEQANCKGEQVFVEKGEYPRWDSVTSsRrTDSLSLPLKVDsQEHKIILYENPNFTKKMEVIdDDVPSFHAHGYQEKVSVRVQSGTWVGYQYGYRGLDYLLLEKGDYKDSGDFGAPQPOVQSVRRIRdmqw-</p> <p>Proposed: aliSize=171 (resi) RMSD=1.22 (Å)<br/> --GKTFEDRSFOGRHYECSSDHSNLOPY-FSRCNSIRSDSCWMLYERPNOYHOYFLRRDYDYOOVMG--GFSSTRSCRLPHAGS-HRMRVYKEDHKVMMLSEI-CSCIODRFHLSEVRSLOVLECWVLYEMTNVGRVLLRPOEYRRFQVWGSVDAKAGSLRRVDFV-----ly<br/> lnPKIIFEQENFOGHSHLNGPCPNLKETgVEKAGSVLQAQPNVGYEQANCKGEQVFVEKGEYPRWDSVTSsRRTDLSLPLKVDsQEHKIILYENPNFTKKMEVIdDDVPSFHAHGYQEKVSVRVQSGTWVGYQYGYRGLDYLLLEKGDYKDSGDFGAPQPOVQSVRRIRdmqw--</p>         |
| 986 | C | 36.78 | <p><b>1amma (174)</b></p> <p>TM-align: aliSize=86 (resi) RMSD=1.10 (Å)<br/> -----GKTFYEDRGFOGRHYECSSDHSNLOPY-FSRCNSIRSDSCWMLYERPNOYHOYFLRRDYDYOOVMGFDSDSTRSCRLPHAGSHRLRlye<br/> lnpkiiifeqenfqgshelngpcpnlketgvekagsvlvqagpwgyeqanckgeqvfekgeyprwdsstssrrtdslslrpikvdsqehkiilyenpnftkkmevidddvpsfahgyqekvsvrvqsgtwvgyqygyrGLDYLLLEKGDYKDSGDFGAPQPOVQSVRRIRdmqw-----</p> <p>ddfrgqmseitddcpslqdrfhltevhslnvlegswvlyempsyrgqyllrpqeyryldwgannakvgslrrvmdfy</p> <p><b>2bb2A (181)</b></p> <p>SARST: aliSize=167 (resi) RMSD=16.50 (Å)<br/> g---KTFYEDRGFOGRHYECSSDHSNLOPY-FSRCNSIRSDSCWMLYERPNOYHOYFLRRDYDYOOVMG--MgFSDSTRSCRLPHAGSHRMRVYKEDHKVMMLSEI-CSCIODRFHLSEVRSLOVLECWVLYEMTNVGRVLLRPOEYRRFQVWGSVDAKAGSLRRVDFV-----mdfy<br/> -lnPKIIFEQENFOGHSHLNGPCPNLKETgVEKAGSVLQAQPNVGYEQANCKGEQVFVEKGEYPRWDSVTSsRrTDSLSLPLKVDsQEHKIILYENPNFTKKMEVIdDDVPSFHAHGYQEKVSVRVQSGTWVGYQYGYRGLDYLLLEKGDYKDSGDFGAPQPOVQSVRRIRdmqw----</p> <p>BLAST: aliSize=97 (resi) iden=37.36% (65/174) simi=55.75% (97/174)<br/> g---KTFYEDRGFOGRHYECSSDHSNLOPY-FSRCNSIRSDSCWMLYERPNOYHOYFLRRDYDYOOVMG--NDSIRSCRLPHAGSHRMRVYKEDHKVMMLSEI-CSCIODRFHLSEVRSLOVLECWVLYEMTNVGRVLLRPOEYRRYLDWGAMNAKVGSLRRVDFV-----fy<br/> -lnPKIIFEQENFOGHSHLNGPCPNLKETgVEKAGSVLQAQPNVGYEQANCKGEQVFVEKGEYPRWDSVTSsRrTDSLSLPLKVDsQEHKIILYENPNFTKKMEVIdDDVPSFHAHGYQEKVSVRVQSGTWVGYQYGYRGLDYLLLEKGDYKDSGDFGAPQPOVQSVRRIRdmqw--</p> <p>Proposed: aliSize=172 (resi) RMSD=1.23 (Å)<br/> --GKTFYEDRGFOGRHYECSSDHSNLOPY-FSRCNSIRSDSCWMLYERPNOYHOYFLRRDYDYOOVMG--GFNDSIRSCRLPHAGSHRMRVYKEDHKVMMLSEI-CSCIODRFHLSEVRSLOVLECWVLYEMTNVGRVLLRPOEYRRYLDWGAMNAKVGSLRRVDFV-----fy<br/> lnPKIIFEQENFOGHSHLNGPCPNLKETgVEKAGSVLQAQPNVGYEQANCKGEQVFVEKGEYPRWDSVTSsRRTDLSLPLKVDsQEHKIILYENPNFTKKMEVIdDDVPSFHAHGYQEKVSVRVQSGTWVGYQYGYRGLDYLLLEKGDYKDSGDFGAPQPOVQSVRRIRdmqw--</p> |

|     |                                                             |   |       |                                                                                                                                                                                                                                                                                                                                                                                                                                                                                                                                                                                                                                                                                                                                                                                                                                                                                                                                                                                                                                                                                                                                                                                                                                                                                                                                                                                                                                                                                                                                                                                                                                                                                                                                                                                                                                                                                                                                                                                                           |
|-----|-------------------------------------------------------------|---|-------|-----------------------------------------------------------------------------------------------------------------------------------------------------------------------------------------------------------------------------------------------------------------------------------------------------------------------------------------------------------------------------------------------------------------------------------------------------------------------------------------------------------------------------------------------------------------------------------------------------------------------------------------------------------------------------------------------------------------------------------------------------------------------------------------------------------------------------------------------------------------------------------------------------------------------------------------------------------------------------------------------------------------------------------------------------------------------------------------------------------------------------------------------------------------------------------------------------------------------------------------------------------------------------------------------------------------------------------------------------------------------------------------------------------------------------------------------------------------------------------------------------------------------------------------------------------------------------------------------------------------------------------------------------------------------------------------------------------------------------------------------------------------------------------------------------------------------------------------------------------------------------------------------------------------------------------------------------------------------------------------------------------|
| 987 | <p><b>lzwmA</b><br/>(177)</p> <p><b>lytqA</b><br/>(181)</p> | C | 33.90 | <p><b>TM-align:</b> aliSize=90 (resi) RMSD=1.59 (Å)</p> <p>lnpkiiifeqenfqgshelngpcpnlketgvekagsvlvqagpwwgyeqanckgeqfvekgeyprwdswtsrrtdslsslrpikv-----SKTGGKISFYEDRNFQRRYDCDCADFR--SYLSRCNSIRVEGTTAVYERPNSHMYILPOGEYFYORMGLNDRIKSCRAVHLS<b>SG</b>gakiqvfe<br/> DSEHKLILYENPNFTGKMEIIDDVPSFHAHGQYQEKVSSVRVQSGTWWGQYQYGRGLOYLLEKDYKDSDFGAPHPQVQSVRRIRDMQW-----</p> <p>kgdfngqmyettedcpsimeqfhlreihsckvvegtwifyelpnygrqylldkkeyrkpvdwgaaspaiqsfrive</p> <p><b>SARST:</b> aliSize=170 (resi) RMSD=15.34 (Å)</p> <p>skt---GGKISFYEDRNFQRRYDCDCADFRSY-LSRCNSIRVEGTTAVYERPNSHMYILPOGEYFYORMGLNDRIKSCRAVHLS<b>SG</b>gakiqvfe-----v<br/> ---lnpkiiifeqenfqgshelngpcpnlketgvekagsvlvqagpwwgyeqanckgeqfvekgeyprwdswtsrrtdslsslrpikv-----DSEHKLILYENPNFTGKMEIIDDVPSFHAHGQYQEKVSSVRVQSGTWWGQYQYGRGLOYLLEKDYKDSDFGAPHPQVQSVRRIRDMQW-</p> <p><b>BLAST:</b> aliSize=94 (resi) iden=34.66% (61/177) simi=53.41% (94/177)</p> <p>sktgg---GGKISFYEDRNFQRRYDCDCADFRSY-LSRCNSIRVEGTTAVYERPNSHMYILPOGEYFYORMGLNDRIKSCRAVHLS<b>SG</b>gakiqvfe-----v<br/> -----lnpkiiifeqenfqgshelngpcpnlketgvekagsvlvqagpwwgyeqanckgeqfvekgeyprwdswtsrrtdslsslrpikv-----DSEHKLILYENPNFTGKMEIIDDVPSFHAHGQYQEKVSSVRVQSGTWWGQYQYGRGLOYLLEKDYKDSDFGAPHPQVQSVRRIRDMQW-</p> <p><b>Proposed:</b> aliSize=174 (resi) RMSD=1.45 (Å)</p> <p>sktgg---GGKISFYEDRNFQRRYDCDCADFRSY-LSRCNSIRVEGTTAVYERPNSHMYILPOGEYFYORMGLNDRIKSCRAVHLS<b>SG</b>gakiqvfe-----v<br/> ---lnpkiiifeqenfqgshelngpcpnlketgvekagsvlvqagpwwgyeqanckgeqfvekgeyprwdswtsrrtdslsslrpikv-----DSEHKLILYENPNFTGKMEIIDDVPSFHAHGQYQEKVSSVRVQSGTWWGQYQYGRGLOYLLEKDYKDSDFGAPHPQVQSVRRIRDMQW-</p>                                                                                                                                                                                                                                                                                                                                                                                                   |
| 988 | <p><b>2jdfA</b><br/>(175)</p> <p><b>lytqA</b><br/>(181)</p> | C | 34.86 | <p><b>TM-align:</b> aliSize=89 (resi) RMSD=1.84 (Å)</p> <p>gkittfyedrafqgrsyecttdcpnlqpyfsrncsirvesgcwmiyerpnyqghyqlrrgeypdyqwmglssdsirsccli<b>pph</b>-----lnpkiiifeqenfqgshelngpcpnlketgvekagsvlvqagpwwgyeqanckgeqfvekgeyprwdswtsrrtdslsslrpikv-----SGAYRMKIYDRDELRLQ<br/> -----lnpkiiifeqenfqgshelngpcpnlketgvekagsvlvqagpwwgyeqanckgeqfvekgeyprwdswtsrrtdslsslrpikv-----KVDSEHKILYENPNFTGK</p> <p>MSHLT-DLCLVQDRFHLTEHSLNLEISWILYEMPNYRCROYLIRPTEYRRFLDWGAPNAKVGSLRRVMDlyl--<br/> KMIIIDDVPSFHAHGQYQEKVSSVRVQSGTWWGQYQYGRGLOYLLEKDYKDSDFGAPHPQVQSVRRIRDMQW----</p> <p><b>SARST:</b> aliSize=168 (resi) RMSD=15.88 (Å)</p> <p>g---GKITYEDRAFQGRSYECTTDCPNLOPY-FSRCNSIRVESGCWMIYERPNOYHOYFLRRGEYDYOOMGLSDSIRSCCL<b>PPHSGAYRMKIYDRDELRLQMS</b>ELTDDCLVQDRFHLTEHSLNLEISWILYEMPNYRCROYLIRPTEYRRFLDWGAPNAKVGSLRRVMDlyl<br/> -lnpkiiifeqenfqgshelngpcpnlketgvekagsvlvqagpwwgyeqanckgeqfvekgeyprwdswtsrrtdslsslrpikv-----KVDSEHKILYENPNFTGKMEIIDDVPSFHAHGQYQEKVSSVRVQSGTWWGQYQYGRGLOYLLEKDYKDSDFGAPHPQVQSVRRIRDMQW----</p> <p><b>BLAST:</b> aliSize=99 (resi) iden=34.86% (61/175) simi=56.57% (99/175)</p> <p>g---GKITYEDRAFQGRSYECTTDCPNLOPY-FSRCNSIRVESGCWMIYERPNOYHOYFLRRGEYDYOOMGLSDSIRSCCL<b>PPHSGAYRMKIYDRDELRLQMS</b>ELTDDCLVQDRFHLTEHSLNLEISWILYEMPNYRCROYLIRPTEYRRFLDWGAPNAKVGSLRRVMDlyl<br/> -lnpkiiifeqenfqgshelngpcpnlketgvekagsvlvqagpwwgyeqanckgeqfvekgeyprwdswtsrrtdslsslrpikv-----KVDSEHKILYENPNFTGKMEIIDDVPSFHAHGQYQEKVSSVRVQSGTWWGQYQYGRGLOYLLEKDYKDSDFGAPHPQVQSVRRIRDMQW----</p> <p><b>Proposed:</b> aliSize=172 (resi) RMSD=1.30 (Å)</p> <p>---GKITYEDRAFQGRSYECTTDCPNLOPY-FSRCNSIRVESGCWMIYERPNOYHOYFLRRGEYDYOOMGLSDSIRSCCL<b>PPHSGAYRMKIYDRDELRLQMS</b>ELTDDCLVQDRFHLTEHSLNLEISWILYEMPNYRCROYLIRPTEYRRFLDWGAPNAKVGSLRRVMDlyl<br/> lnpkiiifeqenfqgshelngpcpnlketgvekagsvlvqagpwwgyeqanckgeqfvekgeyprwdswtsrrtdslsslrpikv-----KVDSEHKILYENPNFTGKMEIIDDVPSFHAHGQYQEKVSSVRVQSGTWWGQYQYGRGLOYLLEKDYKDSDFGAPHPQVQSVRRIRDMQW----</p>                                                           |
| 989 | <p><b>2jdfA</b><br/>(175)</p> <p><b>2bb2A</b><br/>(181)</p> | C | 34.86 | <p><b>TM-align:</b> aliSize=86 (resi) RMSD=1.15 (Å)</p> <p>lnpkiiifeqenfqgshelngpcpnlketgvekagsvlvqagpwwgyeqanckgeqfvekgeyprwdswtsrrtdslsslrpikv-----GKITYEDRAFQGRSYECTTDCPNLOPY-FSRCNSIRVESGCWMIYERPNOYHOYFLRRGEYDYOOMGLSDSIRSCCL<b>PPHSGAYRMKIYDRDELRLQMS</b>ELTDDCLVQDRFHLTEHSLNLEISWILYEMPNYRCROYLIRPTEYRRFLDWGAPNAKVGSLRRVMDlyl<br/> -----lnpkiiifeqenfqgshelngpcpnlketgvekagsvlvqagpwwgyeqanckgeqfvekgeyprwdswtsrrtdslsslrpikv-----KVDSEHKILYENPNFTGKMEIIDDVPSFHAHGQYQEKVSSVRVQSGTWWGQYQYGRGLOYLLEKDYKDSDFGAPHPQVQSVRRIRDMQW----</p> <p>delrgqmseltdclsvqdrfhlteihslvlegswilyempnygrqyllrpeyrrfldwgapnakvgsllrrvmdlyl</p> <p><b>SARST:</b> aliSize=167 (resi) RMSD=16.38 (Å)</p> <p>g---GKITYEDRAFQGRSYECTTDCPNLOPY-FSRCNSIRVESGCWMIYERPNOYHOYFLRRGEYDYOOMGLSDSIRSCCL<b>PPHSGAYRMKIYDRDELRLQMS</b>ELTDDCLVQDRFHLTEHSLNLEISWILYEMPNYRCROYLIRPTEYRRFLDWGAPNAKVGSLRRVMDlyl<br/> -lnpkiiifeqenfqgshelngpcpnlketgvekagsvlvqagpwwgyeqanckgeqfvekgeyprwdswtsrrtdslsslrpikv-----KVDSEHKILYENPNFTGKMEIIDDVPSFHAHGQYQEKVSSVRVQSGTWWGQYQYGRGLOYLLEKDYKDSDFGAPHPQVQSVRRIRDMQW----</p> <p><b>BLAST:</b> aliSize=98 (resi) iden=34.86% (61/175) simi=56.00% (98/175)</p> <p>g---GKITYEDRAFQGRSYECTTDCPNLOPY-FSRCNSIRVESGCWMIYERPNOYHOYFLRRGEYDYOOMGLSDSIRSCCL<b>PPHSGAYRMKIYDRDELRLQMS</b>ELTDDCLVQDRFHLTEHSLNLEISWILYEMPNYRCROYLIRPTEYRRFLDWGAPNAKVGSLRRVMDlyl<br/> -lnpkiiifeqenfqgshelngpcpnlketgvekagsvlvqagpwwgyeqanckgeqfvekgeyprwdswtsrrtdslsslrpikv-----KVDSEHKILYENPNFTGKMEIIDDVPSFHAHGQYQEKVSSVRVQSGTWWGQYQYGRGLOYLLEKDYKDSDFGAPHPQVQSVRRIRDMQW----</p> <p><b>Proposed:</b> aliSize=172 (resi) RMSD=1.31 (Å)</p> <p>---GKITYEDRAFQGRSYECTTDCPNLOPY-FSRCNSIRVESGCWMIYERPNOYHOYFLRRGEYDYOOMGLSDSIRSCCL<b>PPHSGAYRMKIYDRDELRLQMS</b>ELTDDCLVQDRFHLTEHSLNLEISWILYEMPNYRCROYLIRPTEYRRFLDWGAPNAKVGSLRRVMDlyl<br/> lnpkiiifeqenfqgshelngpcpnlketgvekagsvlvqagpwwgyeqanckgeqfvekgeyprwdswtsrrtdslsslrpikv-----KVDSEHKILYENPNFTGKMEIIDDVPSFHAHGQYQEKVSSVRVQSGTWWGQYQYGRGLOYLLEKDYKDSDFGAPHPQVQSVRRIRDMQW----</p> |

|     |   |       |                                                                                                                                                                                                                                                                                                                                                                                                                                                                                                                                                                                                                                                                                                                                                                                                                                                                                                                                                                                                                                                                                                                                                                                                                                                                                                                                                                                                                                                                                                                                                                                                                                                                                                                |
|-----|---|-------|----------------------------------------------------------------------------------------------------------------------------------------------------------------------------------------------------------------------------------------------------------------------------------------------------------------------------------------------------------------------------------------------------------------------------------------------------------------------------------------------------------------------------------------------------------------------------------------------------------------------------------------------------------------------------------------------------------------------------------------------------------------------------------------------------------------------------------------------------------------------------------------------------------------------------------------------------------------------------------------------------------------------------------------------------------------------------------------------------------------------------------------------------------------------------------------------------------------------------------------------------------------------------------------------------------------------------------------------------------------------------------------------------------------------------------------------------------------------------------------------------------------------------------------------------------------------------------------------------------------------------------------------------------------------------------------------------------------|
| 990 | N | 34.68 | <p><b>1h4aX (173)</b></p> <p>TM-align: aliSize=89 (resi) RMSD=1.79 (Å)<br/> gkItlyedrgfgrhyecssdhpnlqpylsrcnsarvdsgecmlyeqpnysglqyflhradyadhqwmglssdsvrscrli pbs-----lnpkiiii feqenfqghshelngpcpniketgvekagsvlvqagppwgyeqanckgeqfvfekgeyprwdswtssrrtdsisslrpi kvdsQEHKILYENPNFTK</p> <p>MIEFT-ECSCLODRFRFNEIHSLNLEISWVLELSNYRCROYLIMPEDYRRYQDWGATNARVGLRRVIIFS-<br/> KMEVIdDDVPSFHAHGYQEKVSSVRVQSCTVVGQYPGYRGLLOYLLEKGDYKDSGDFGAPQPOVQSVRRIRDMQW</p> <p><b>2b2A (181)</b></p> <p>SARST: aliSize=166 (resi) RMSD=16.42 (Å)<br/> g---KITYEDRGFOCRHYECSSDHPNLOPYL SRCNSARVDSGCMLEOPNYSLOYFLHRDYADHOOM---MGLSDSVRSCCLPHSG-SHRIRYEREDYRQOM-IEFTEFCSCLODR-FRfnETHSLNLEISWVLELSNYRCROYLIMPEDYRRYQDWGATNARVGLRRVI----idfs<br/> -lnpkIIIFEQENFOGHSHELNGPCPNLKETgVEKAGSVLQAQFPVVGVEQANCKGEQFVFEKGEYPRWDSWTSsRRTDLSLSLRPKVDSQEHKILYENPNFTKMKMEVIdDDVPSFHAHGYQEKVSSVRVQSCTVVGQYPGYRGLLOYLLEKGDYKDSGDFGAPQPOVQSVRRIRdmqw----</p> <p>BLAST: aliSize=92 (resi) iden=35.84% (62/173) simi=53.18% (92/173)<br/> g---KITYEDRGFOCRHYECSSDHPNLOPYL SRCNSARVDSGCMLEOPNYSLOYFLHRDYADHOOMMG--LSDSVRSCCLPHSGSHRIRYEREDYRQOMIEFTEFCSCLODRFRFNEIHSLNLEISWVLELSNYRCROYLIMPEDYRRYQDWGATNARVGLRRVI---fs<br/> -lnpkIIIFEQENFOGHSHELNGPCPNLKETgVEKAGSVLQAQFPVVGVEQANCKGEQFVFEKGEYPRWDSWTSsRRTDLSLSLRPKVDSQEHKILYENPNFTKMKMEVIdDDVPSFHAHGYQEKVSSVRVQSCTVVGQYPGYRGLLOYLLEKGDYKDSGDFGAPQPOVQSVRRIRmqw--</p> <p>Proposed: aliSize=171 (resi) RMSD=1.23 (Å)<br/> 1nPKIIIFEQENFOGHSHELNGPCPNLKETgVEKAGSVLQAQFPVVGVEQANCKGEQFVFEKGEYPRWDSWTSsRRTDLSLSLRPKVDSQEHKILYENPNFTKMKMEVIdDDVPSFHAHGYQEKVSSVRVQSCTVVGQYPGYRGLLOYLLEKGDYKDSGDFGAPQPOVQSVRRIRmqw--</p>                                                                                          |
| 991 | C | 34.50 | <p><b>2jdgA (171)</b></p> <p>TM-align: aliSize=87 (resi) RMSD=1.49 (Å)<br/> --GSIIFLEDRAFOCRHYGCTTDCPNLOPY-FSRCNSIVVQSCCMIIYERPNOYHOYFLRRGEYDYOOVMG-L-SDSIRSCCLPPHSGAvmrkivdrdelreagmseltdclsvadrflhteihslnvlegswilvempnvreravllrnpgevrrfldwgapnakvslrrvm-----<br/> 1nPKIIIFEQENFOGHSHELNGPCPNLKETgVEKAGSVLQAQFPVVGVEQANCKGEQFVFEKGEYPRWDSWTSsRRTDLSLSLRPKVDSQEHKILYENPNFTKMKMEVIdDDVPSFHAHGYQEKVSSVRVQSCTVVGQYPGYRGLLOYLLEKGDYKDSGDFGAPQPOVQSVRRIRdmqw--</p> <p>kmeiiddvpsfhahgyqekvssvrvgsgtwgyqygyrglqylllekdykdsdfgaphpqvsvrrirdmqw</p> <p><b>1ytqA (181)</b></p> <p>SARST: aliSize=168 (resi) RMSD=16.07 (Å)<br/> g---SIFLEDRAFOCRHYGCTTDCPNLOPY-FSRCNSIVVQSCCMIIYERPNOYHOYFLRRGEYDYOOVMG--MGLSDSIRSCCLPPHSGAYRMKIYDRDELRCOMSEL-TDCLSVODrFHLTEIHSLNLEISWVLELSNYRCROYLIMPEDYRRYQDWGATNARVGLRRVI----m<br/> -lnpkIIIFEQENFOGHSHELNGPCPNLKETgVEKAGSVLQAQFPVVGVEQANCKGEQFVFEKGEYPRWDSWTSsRRTDLSLSLRPKVDSQEHKILYENPNFTKMKMEVIdDDVPSFHAHGYQEKVSSVRVQSCTVVGQYPGYRGLLOYLLEKGDYKDSGDFGAPQPOVQSVRRIRdmqw-</p> <p>BLAST: aliSize=95 (resi) iden=34.50% (59/171) simi=55.56% (95/171)<br/> gs---SIFLEDRAFOCRHYGCTTDCPNLOPY-FSRCNSIVVQSCCMIIYERPNOYHOYFLRRGEYDYOOVMG--LSDSIRSCCLPPHSGAYRMKIYDRDELRCOMSEL-TDCLSVODRFHLTEIHSLNLEISWVLELSNYRCROYLIMPEDYRRYQDWGATNARVGLRRVI----m<br/> --lnpkIIIFEQENFOGHSHELNGPCPNLKETgVEKAGSVLQAQFPVVGVEQANCKGEQFVFEKGEYPRWDSWTSsRRTDLSLSLRPKVDSQEHKILYENPNFTKMKMEVIdDDVPSFHAHGYQEKVSSVRVQSCTVVGQYPGYRGLLOYLLEKGDYKDSGDFGAPQPOVQSVRRIRdmqw-</p> <p>Proposed: aliSize=171 (resi) RMSD=1.29 (Å)<br/> 1nPKIIIFEQENFOGHSHELNGPCPNLKETgVEKAGSVLQAQFPVVGVEQANCKGEQFVFEKGEYPRWDSWTSsRRTDLSLSLRPKVDSQEHKILYENPNFTKMKMEVIdDDVPSFHAHGYQEKVSSVRVQSCTVVGQYPGYRGLLOYLLEKGDYKDSGDFGAPQPOVQSVRRIRdmqw</p> |
| 992 | C | 12.36 | <p><b>1ez3B (124)</b></p> <p>TM-align: aliSize=68 (resi) RMSD=2.49 (Å)<br/> drfmdeffeqvEETRGFIDKIAENVVEVKRKHSAIAspNPDEKTKEELEELMSDIKKTANKVRSKLSIEQSIeQeEgLnR-SSadlrirkqhtslsrkfvevmseynatqsdyerckgriq-----<br/> -----DPFQOVVKDTKEQLNRINNYI TRHN-T-AGDDQEEIEQDILKDVETIVDLDRSIVMKRDENEDV-S--gRE-----aqvknikqldalklrfdr</p> <p><b>2c5jB (89)</b></p> <p>SARST: aliSize=86 (resi) RMSD=20.39 (Å)<br/> drfmdeffeqveir-GIDKIAENVVEVKRKHSAIAspNPDEKTKEELEELMSDIKKTANKVRSKLSIEQSIeQeEgLnRssadlrirkqhtslsrkfvevmseynatqsdyerckgriq<br/> -----dPFQOVVKDTKEQLNRINNYI TRHNTAGDDQEEIEQDILKDVETIVDLDRSIVMKRD-----ENEDVSGREAQVKNIKQQLDALKLRFdr-----</p> <p>BLAST: aliSize=30 (resi) iden=14.61% (13/89) simi=33.71% (30/89)<br/> drfmdeff-----EIVVEETRGFIDKIAENVVEVKRKHSAIAspNPDEKTKEELEELMSDIKKTANKVRS-KLK----sieqsieqEgLnRssadlrirkqhtslsrkfvevmseynatqsdyerckgriq<br/> -----dpfqovvkdtkelqnrinnyi trhntagddqeeIEQDILKDVETIVDLDRSIVMKR-DE--NEDVSGREAQVKNIKQQLDAIKLrfdr-----</p> <p>Proposed: aliSize=76 (resi) RMSD=1.59 (Å)<br/> drfmdeffeqveirgfIdkIAENVVEVKRKHSAIAspNPDEKTKEELEELMSDIKKTANKVRSKLSIEQSIeQeEgLnRssadlrirkqhtslsrkfvevmseynatqsdyerckgriq<br/> -----D-PFQOVVKDTKEQLNRINNYI trhntagddqeeIEQDILKDVETIVDLDRSIVMKRDENEDVSGREAQV-----KNIKQQLDALKLRFDR-----</p>                                                                                                                                                                                                                                                                                                                                                                                                                                                   |

|     |                                              |   |       |                                                                                                                                                                                                                                                                                                                                                                                                                                                                                                                                                                                                                                                                                                                                                                                                                                                                                                                                                                                                                                                                                                                                                                                  |
|-----|----------------------------------------------|---|-------|----------------------------------------------------------------------------------------------------------------------------------------------------------------------------------------------------------------------------------------------------------------------------------------------------------------------------------------------------------------------------------------------------------------------------------------------------------------------------------------------------------------------------------------------------------------------------------------------------------------------------------------------------------------------------------------------------------------------------------------------------------------------------------------------------------------------------------------------------------------------------------------------------------------------------------------------------------------------------------------------------------------------------------------------------------------------------------------------------------------------------------------------------------------------------------|
| 993 | <p>1lvfA<br/>(106)</p> <p>2c5jB<br/>(89)</p> | C | 22.47 | <p><b>TM-align:</b> aliSize=67 (resi) RMSD=2.99 (Å)<br/> edpffvkvGEV[KAVNTAQGLFQFWTELLQ--G-PSAA-TREEIDWTTNELRNNLRSIEWDLEDLDETISIVEANPRKfnldatelsirkafitstrqivrdmkdqmsas-----<br/> -----DPPFQ[VVKDKTKEQLNRINNYITrhNtAGDDdQEEEIQDILKDVVEETIVDLDRSIVMKRDENEDV-SGREAQ-----vknkqqldaklrfdr</p> <p><b>SARST:</b> aliSize=86 (resi) RMSD=17.51 (Å)<br/> edpffvkv-GEV[KAVNTAQGLFQFWTELLQGPSAATREEIDWTTNELRNNLRSIEWDLEDLDETISIVEANPRKfnldATELSIRKAFITSTRQIVR--mkdqmsas<br/> -----dPPFQ[VVKDKTKEQLNRINNYITRHNTAGDDdQEEEIQDILKDVVEETIVDLDRSIVMKRDENEDVSG---REAQVKNIKQQLDALKLRFrr-----</p> <p><b>BLAST:</b> aliSize=33 (resi) iden=24.72% (22/89) simi=37.08% (33/89)<br/> eDPPFFV[KGEVOKAVNTAQGLFQFWTELLQGPSAATREEIDWTTNELRNNLRSIEWDLEDLDETISIVEANPR--fnLDATEL-----sirkafitstrqivrdmkdqmsas<br/> -DPPFQ[VVKDKTKEQLNRINNYITRHNTAGDDdQEEEIQDILKDVVEETIVDLDRSIVMKRDENEDVSGREAQVKNIKQQLDALKLRFdr-----</p> <p><b>Proposed:</b> aliSize=88 (resi) RMSD=1.90 (Å)<br/> eDPPFFV[KGEVOKAVNTAQGLFQFWTELLqgpsaatreeIDWTTNELRNNLRSIEWDLEDLDETISiveanpr--fnLDATELSIRKAFITSTRQIVRDMQMSAS<br/> -DPPFQ[VVKDKTKEQLNRINNYITRH-NTA-----GDdQEEEIQDILKDVVEETIVDLDRSIV-----MKr--DENEDVSGREAQVKNIKQQLDALKLRFDRR</p> |
| 994 | <p>2iggA<br/>(64)</p> <p>1k51A<br/>(72)</p>  | C | 7.81  | <p><b>TM-align:</b> aliSize=52 (resi) RMSD=2.16 (Å)<br/> -----LTPAVTTY[LVINGKT-LKGETTTEAVDaATAEKVFKQYANDNG---VDGEWTYDDaTKtftvtekpe-----<br/> mhhhhhHAMEEVTI[ANLIFANGSTQTAEFKGTf-EKATSEAYAYADTLKkdnGEWTVDVAD--K-----aytlnikfag</p> <p><b>SARST:</b> aliSize=59 (resi) RMSD=10.22 (Å)<br/> lt-----PAVTTY[LVINGKTLKGETTTEAVDAATAEKVFKQYAN--DNGVDGEWTYDDaTKTFTVTEK---pe<br/> --mhhhhhhaMEEVTI[ANLIFANGSTQTAEFKGTfEKATSEAYAYADt1KKDNGEWTVDV-ADKAYTLNIfag--</p> <p><b>BLAST:</b> aliSize=24 (resi) iden=29.69% (19/64) simi=37.50% (24/64)<br/> ltpavttyklvi-----NGLKGETTTTeAVDAATAEKVFKQYANDNGV--GEWTYDDATKTFIVTEK---pe<br/> -----mhhhhhhaeevtikanlifangSTQTAEFKGTfEKATSEAYAYADTLKkdnGEWTVDVADKAYTLNIfag--</p> <p><b>Proposed:</b> aliSize=59 (resi) RMSD=2.10 (Å)<br/> -----LTPAVTTY[LVINGKT-LKGETTTEAVDaATAEKVFKQYANDNG---VDGEWTYD-daTKTFTVTEK--pe<br/> mhhhhhHAMEEVTI[ANLIFANGSTQTAEFKGTf-EKATSEAYAYADTLKkdnGEWTVDVAD--KAYTLNIfag--</p>                                                                                                                                                                                                                                            |
| 995 | <p>2igdA<br/>(61)</p> <p>1k51A<br/>(72)</p>  | C | 14.75 | <p><b>TM-align:</b> aliSize=51 (resi) RMSD=2.17 (Å)<br/> mt-----PAVTTY[LVINGKT-LKGETTTEAVDaATAEKAFKQYANDNG--V-DGWWTYDdaTKtftvte-----<br/> --mhhhhhhaMEEVTI[ANLIFANGSTQTAEFKGTf-EKATSEAYAYADTLKkdnGEWTVDVAD-KA-----ytlnikfag</p> <p><b>SARST:</b> aliSize=57 (resi) RMSD=8.22 (Å)<br/> m-----TPAVTTY[LVINGKTLKGETTTEAVDAATAEKAFKQYANDNGVDGWWTYDdaTKTFTVT----e<br/> -mhhhhhhaMEEVTI[ANLIFANGSTQTAEFKGTfEKATSEAYAYADt1KKDNGEWTVDVAD--KAYTLNIfag-</p> <p><b>BLAST:</b> aliSize=16 (resi) iden=22.95% (14/61) simi=26.23% (16/61)<br/> mtpavttyklvingktlk-----TETITKAVDAATAEKAFKQYANDNG--V-DGWWTYDdaTKTFTVTEK---pe<br/> -----mhhhhhhaeevtikanlifangSTQTAEFKGTfEKATSEAYAYADTLKkdnGEWTVDVADKAYTLNIfag--</p> <p><b>Proposed:</b> aliSize=58 (resi) RMSD=2.02 (Å)<br/> mt-----PAVTTY[LVINGKT-LKGETTTEAVDaATAEKAFKQYANDNG--V-DGWWTYDdaTKTFTVTEK---pe<br/> --mhhhhhhaMEEVTI[ANLIFANGSTQTAEFKGTf-EKATSEAYAYADTLKkdnGEWTVDVADKAYTLNIfag--</p>                                                                                                                                                                                                                                                 |

|     |                                             |   |       |                                                                                                                                                                                                                                                                                                                                                                                                                                                                                                                                                                                                                                                                                                                                                                                                                                                                                                |
|-----|---------------------------------------------|---|-------|------------------------------------------------------------------------------------------------------------------------------------------------------------------------------------------------------------------------------------------------------------------------------------------------------------------------------------------------------------------------------------------------------------------------------------------------------------------------------------------------------------------------------------------------------------------------------------------------------------------------------------------------------------------------------------------------------------------------------------------------------------------------------------------------------------------------------------------------------------------------------------------------|
| 996 | <p>1mhhE<br/>(63)</p> <p>1k51A<br/>(72)</p> | C | 58.73 | <p>TM-align: aliSize=53 (resi) RMSD=1.43 (Å)<br/> -----EVTIKVNLIFADGKIQTAEFKGTFEATAEAYRYAALLAVNGEWTADLEDGgNhmnikfagk-----<br/> mhhhhhameEVTIKANLIFANGSTQTAEFKGTFEKATSEAYAYADTLKIDNGEWTVDVADK-A-----ytlnikfag</p> <p>SARST: aliSize=57 (resi) RMSD=8.50 (Å)<br/> e-----VTIKVNLIFADGKIQTAEFKGTFEATAEAYRYAALLAVNGEWTADLEDgGNHMNIKF----agk<br/> -mhhhhhameEVTIKANLIFANGSTQTAEFKGTFEKATSEAYAYADTLKIDNGEWTVDVA--DKAYTLNIkfag---</p> <p>BLAST: aliSize=48 (resi) iden=68.25% (43/63) simi=76.19% (48/63)<br/> -----EVTIKVNLIFADGKIQTAEFKGTFEATAEAYRYAALLAVNGEWTADLEDGGNHMNIKFAGk<br/> mhhhhhameEVTIKANLIFANGSTQTAEFKGTFEKATSEAYAYADTLKIDNGEWTVDVADKAYTLNIKFAG-</p> <p>Proposed: aliSize=62 (resi) RMSD=0.93 (Å)<br/> -----EVTIKVNLIFADGKIQTAEFKGTFEATAEAYRYAALLAVNGEWTADLEDGGnHMNIKFAGK<br/> mhhhhhameEVTIKANLIFANGSTQTAEFKGTFEKATSEAYAYADTLKIDNGEWTVDVADKA-YTLNIKFAG</p>                             |
| 997 | <p>1kh0A<br/>(65)</p> <p>1k51A<br/>(72)</p> | C | 78.46 | <p>TM-align: aliSize=55 (resi) RMSD=1.34 (Å)<br/> -----EEVTTIKANLIFANGSTQTAEFKGTKEKALSEVLAYADTLKKDNGEWTIIDKRVTNGViiIlnikfag-----<br/> mhhhhhhamEEVTTIKANLIFANGSTQTAEFKGTFEKATSEAYAYADTLKKDNGEWTVDVADK-A-----ytlnikfag</p> <p>SARST: aliSize=61 (resi) RMSD=12.21 (Å)<br/> e-----EVTIKANLIFANGSTQTAEFKGTKEKALSEVLAYADTLKKDNGEwtIDKRVTNGViiIlnikfag-g<br/> -mhhhhhameEVTIKANLIFANGSTQTAEFKGTFEKATSEAYAYADTLKKDNGE--WTVDVADKAYTLNIKFAG-</p> <p>BLAST: aliSize=54 (resi) iden=80.00% (52/65) simi=83.08% (54/65)<br/> -----EEVTTIKANLIFANGSTQTAEFKGTKEKALSEVLAYADTLKKDNGEWTIIDKRVTNGViiIlnikfag<br/> mhhhhhhamEEVTTIKANLIFANGSTQTAEFKGTFEKATSEAYAYADTLKKDNGEWTVDVADKAYTLNIKFAG</p> <p>Proposed: aliSize=63 (resi) RMSD=0.86 (Å)<br/> -----EEVTTIKANLIFANGSTQTAEFKGTKEKALSEVLAYADTLKKDNGEWTIIDKRVTNgviiIlnikfag<br/> mhhhhhhamEEVTTIKANLIFANGSTQTAEFKGTFEKATSEAYAYADTLKKDNGEWTVDVADKA--YTNIKFAG</p> |
| 998 | <p>1hz6B<br/>(63)</p> <p>1k51A<br/>(72)</p> | C | 98.41 | <p>TM-align: aliSize=53 (resi) RMSD=1.21 (Å)<br/> -----EEVTTIKANLIFANGSTQTAEFKGTFEKATSEAYAYADTLKKDNGEWTVDVADKgytlnikfag-----<br/> mhhhhhhamEEVTTIKANLIFANGSTQTAEFKGTFEKATSEAYAYADTLKKDNGEWTVDVADK-----aytlnikfag</p> <p>SARST: aliSize=60 (resi) RMSD=11.74 (Å)<br/> ee-----VTIKANLIFANGSTQTAEFKGTFEKATSEAYAYADTLKKDNGEWTVDVADKGYTLNIKFAG-g<br/> --mhhhhhameEVTIKANLIFANGSTQTAEFKGTFEKATSEAYAYADTLKKDNGEWTVDVADKAYTLNIKFAG-g-</p> <p>BLAST: aliSize=62 (resi) iden=98.41% (62/63) simi=98.41% (62/63)<br/> -----EEVTTIKANLIFANGSTQTAEFKGTFEKATSEAYAYADTLKKDNGEWTVDVADKGYTLNIKFAG<br/> mhhhhhhamEEVTTIKANLIFANGSTQTAEFKGTFEKATSEAYAYADTLKKDNGEWTVDVADKAYTLNIKFAG</p> <p>Proposed: aliSize=63 (resi) RMSD=1.29 (Å)<br/> -----EEVTTIKANLIFANGSTQTAEFKGTFEKATSEAYAYADTLKKDNGEWTVDVADKGYTLNIKFAG<br/> mhhhhhhamEEVTTIKANLIFANGSTQTAEFKGTFEKATSEAYAYADTLKKDNGEWTVDVADKAYTLNIKFAG</p>                 |

|      |                                               |   |       |                                                                                                                                                                                                                                                                                                                                                                                                                                                                                                                                                                                                                                                                                                                                                                                                                                                                                                                                                                                                                                                                                                                                                                                                                                                                                                                                                                                                                                                                                                                              |
|------|-----------------------------------------------|---|-------|------------------------------------------------------------------------------------------------------------------------------------------------------------------------------------------------------------------------------------------------------------------------------------------------------------------------------------------------------------------------------------------------------------------------------------------------------------------------------------------------------------------------------------------------------------------------------------------------------------------------------------------------------------------------------------------------------------------------------------------------------------------------------------------------------------------------------------------------------------------------------------------------------------------------------------------------------------------------------------------------------------------------------------------------------------------------------------------------------------------------------------------------------------------------------------------------------------------------------------------------------------------------------------------------------------------------------------------------------------------------------------------------------------------------------------------------------------------------------------------------------------------------------|
| 999  | <p>1le4A<br/>(139)</p> <p>low6A<br/>(134)</p> | N | 11.94 | <p><b>TM-align:</b> aliSize=97 (resi) RMSD=3.02 (Å)<br/> qrwelaigrfw-----DYI-RWVqtIseqVqeeLlssqVtqELRALMDETmKEIKAYKSELEEQL-TPVaeEETRARLSKELQAAQARLGADMEDVRGRVqRgeVqamlgqsTeelrvRLASHLRKLRKRLRDIDLQKRLAVY-----<br/> -----nldrndkvYENVtGLVKAVIEMSSKIQP-----P-----E--EYVPMVKVGLALRLLATVDETIPLLP-ASTHREIEMAOKLLNSDLGELINKMKLAQQVMTSLQOEYKQMLTAAHALAVDAKNLDDVLDQARLkmlgqt</p> <p><b>SARST:</b> aliSize=118 (resi) RMSD=11.75 (Å)<br/> q-----RWELALGRFWDYLRWVQTLSeqvqee1lssqVtQELRALMDETmKEIKAYKSELEEQL-TPVaeEETRARLSKELQAAQARLGADMEDVRGR---LVQYRGEVQAMlgqsTeelrvRLASHLRKLRKRLRDIDLQKRLAVY---lavy<br/> -nldrndkvYENVtGLVKAVIEMSSKIQP-----APPEEYVPMVKVGLALRLLATVDETIPLLPASTHREIEMAOKLLNSDLGELINKMKLAQQVMTSLQOEYKQML-----TAAHALAVDAKNLDDVLDQARLkmlgqt---</p> <p><b>BLAST:</b> aliSize=50 (resi) iden=20.15% (27/134) simi=37.31% (50/134)<br/> qrwelaigrfwdylrw-----VQTLSEQVQEE--LLSSQVtQEL---RALMDETmKEIKAYKSELEEQL-TPVaeEETRARLSKELQAAQARLGADMEDVRGRVQYRGEVqamlgqsTeelrvrlashlrklrkrllrdaddlqkrlavy<br/> -----nldrndkvYENVtGLVKAVIEMSSKIqpappeeYvpmvkeVGLALRLLATVDETIPLLPASTHREIEMAOKLLNSDLGELINKMKLAQQVMTSLQOEYKQML-----TAAHALAVDAKNLDDVLDQARLkmlgqt-----</p> <p><b>Proposed:</b> aliSize=111 (resi) RMSD=2.31 (Å)<br/> -----QRWELALGRFWDYLRWVQTLSeqvqee1lssqVtQELRALMDETmKEIKAYKSELEEQL-TPVaeEETRARLSKELQAAQARLGADMEDVRGRVQYRGEVqamlgqsTeelrvRLASHLRKLRKRLRDIDLQKRLAVY-----<br/> nldrndkvYENVtGLVKAVIEMSSKIQPappee-----YVPMVKVGLALRLLATVDETIPLLP-----ASTHREIEMAOKLLNSDLGELINKMKLAQQVMTSLQOEYKQMLTAAHALAVDAKNLDDVLDQARLkmlgqt</p> |
| 1000 | <p>1k40A<br/>(126)</p> <p>low6A<br/>(134)</p> | N | 96.83 | <p><b>TM-align:</b> aliSize=107 (resi) RMSD=1.74 (Å)<br/> ndkvYENVtGLVKAVIEMSSKIQP-----ms--SK-iQPAPPEEYVPMVKVGLALRLLATVDETIPLLPASTHREIEMAOKLLNSDLGELINKMKLAQQVMTSLQOEYKQMLTAAHALAVDAKNLDDVLDQARLkmlgqt<br/> -----nldrndkvYENVtGLVKAVIEMSSKIQP-----ms--SK-iQPAPPEEYVPMVKVGLALRLLATVDETIPLLPASTHREIEMAOKLLNSDLGELINKMKLAQQVMTSLQOEYKQMLTAAHALAVDAKNLDDVLDQARLkmlgqt</p> <p><b>SARST:</b> aliSize=115 (resi) RMSD=10.06 (Å)<br/> ndkv-----YENVtGLVKAVIEMSSKIQP-----APPEEYVPMVKVGLALRLLATVDETIPLLPASTHREIEMAOKLLNSDLGELINKMKLAQQV-----VMTSLQOEYKQMLTAAHALAVDAKNLDDVLDQARLkmlgqt<br/> ---nldrndkvYENVtGLVKAVIEMSSKIqpAPPEEYVPMVKVGLALRLLATVDETIPLLPASTHREIEMAOKLLNSDLGELINKMKLAQQVmtslqqEYKQMLTAAHALAVDAKNLDDVLDQARLkmlgqt-----</p> <p><b>BLAST:</b> aliSize=125 (resi) iden=98.41% (124/126) simi=99.21% (125/126)<br/> -----NDKVYENVtGLVKAVIEMSSKIQPAPPEEYVPMVKVGLALRLLATVDETIPLLPASTHREIEMAOKLLNSDLGELINKMKLAQQVMTSLQOEYKQMLTAAHALAVDAKNLDDVLDQARLkmlgqt<br/> nldrndkvYENVtGLVKAVIEMSSKIQPAPPEEYVPMVKVGLALRLLATVDETIPLLPASTHREIEMAOKLLNSDLGELINKMKLAQQVMTSLQOEYKQMLTAAHALAVDAKNLDDVLDQARLkmlgqt</p> <p><b>Proposed:</b> aliSize=126 (resi) RMSD=1.05 (Å)<br/> ---N--DKVYENVtGLVKAVIEMSSKIQPAPPEEYVPMVKVGLALRLLATVDETIPLLPASTHREIEMAOKLLNSDLGELINKMKLAQQVMTSLQOEYKQMLTAAHALAVDAKNLDDVLDQARLkmlgqt<br/> nldrndkvYENVtGLVKAVIEMSSKIQPAPPEEYVPMVKVGLALRLLATVDETIPLLPASTHREIEMAOKLLNSDLGELINKMKLAQQVMTSLQOEYKQMLTAAHALAVDAKNLDDVLDQARLkmlgqt</p>                                                                                    |
| 1001 | <p>1e87A<br/>(117)</p> <p>1oz7B<br/>(123)</p> | M | 21.37 | <p><b>TM-align:</b> aliSize=97 (resi) RMSD=1.85 (Å)<br/> sSSEdVVGyQRKCYFISTVKRSWTSQNAQSEH-G-ATLAVIDSEKDMNFKRYA---GREEHVGLKKEP-GHPWkwsngkefnwfnvtgs-----DKCVFLKN--TEVSSMELEKNLYWICNKIYK<br/> -NCLPDWVSVTEGYCYKVFKERMNWADAKEFPTKQhKdGHVVSFRNSKEVDFVVISIAFpm1KNDLVWIGLTDYWRDC-----nnewsdgaqldykawdneRHCFTYKntdnQWTRRD-TWTFsfvckcA-</p> <p><b>SARST:</b> aliSize=92 (resi) RMSD=6.55 (Å)<br/> ss--CSEdVVGyQRKCYFISTVKRSWTSQNAQSEH--GATLAVIDSEKDMNFKRYAGREE---HVGL-----KKE-----P-GHPWKW-SNGkefnwfnvtgsdkcvflkntEVSMELEKNLYWICNKIYK<br/> --nCLPDWVSVTEGYCYKVFKERMNWADAKEFPTKQhKdGHVVSFRNSKEVDFVVISIAFpmlKndLVWIGLTDYWRDCnnewsdgaqldykawdneRHCFTYKntdnQWTRRD-TWTFsfvckcA--</p> <p><b>BLAST:</b> aliSize=54 (resi) iden=25.64% (30/117) simi=46.15% (54/117)<br/> sSSEdVVGyQRKCYFISTVKRSWTSQNAQSEH-G-ATLAVIDSEKDMNFKRYA---GREEHVGLKKEP-GHPWkwsngkefnwfnvtgsdkcvflknt--EVSMELEKNLYWICNKIYK<br/> -NCLPDWVSVTEGYCYKVFKERMNWADAKEFPTKQhKdGHVVSFRNSKEVDFVVISIAFpmlKNDLVWIGLTDYWRDCnnewsdgaqldykawdneRHCFTYKntdnQWTRRD-TWTFsfvckcA--</p> <p><b>Proposed:</b> aliSize=112 (resi) RMSD=1.65 (Å)<br/> sSSEdVVGyQRKCYFISTVKRSWTSQNAQSEH-G-ATLAVIDSEKDMNFKRYA---GREEHVGLKKEP-GHPWkwsngkefnwfnvtgsdkcvflknt--EVSMELEKNLYWICNKIYK<br/> -NCLPDWVSVTEGYCYKVFKERMNWADAKEFPTKQhKdGHVVSFRNSKEVDFVVISIAFpmlKNDLVWIGLTDYWRDCnnewsdgaqldykawdneRHCFTYKntdnQWTRRD-TWTFsfvckcA-</p>                                                                                                                                                                         |

|      |                                             |   |       |                                                                                                                                                                                                                                                                                                                                                                                                                                                                                                                                                                                                                                                                                                                                                                                                                                                                                                                                                                                                                                                                                                                                                                                                                                                                                                                                                                                                                                                                                |
|------|---------------------------------------------|---|-------|--------------------------------------------------------------------------------------------------------------------------------------------------------------------------------------------------------------------------------------------------------------------------------------------------------------------------------------------------------------------------------------------------------------------------------------------------------------------------------------------------------------------------------------------------------------------------------------------------------------------------------------------------------------------------------------------------------------------------------------------------------------------------------------------------------------------------------------------------------------------------------------------------------------------------------------------------------------------------------------------------------------------------------------------------------------------------------------------------------------------------------------------------------------------------------------------------------------------------------------------------------------------------------------------------------------------------------------------------------------------------------------------------------------------------------------------------------------------------------|
| 1002 | <p>1e87A (117)</p> <hr/> <p>lukmB (124)</p> | M | 22.22 | <p><b>TM-align:</b> aliSize=96 (resi) RMSD=1.85 (Å)<br/>       ssc-SEDVVG YQRKCYFISTVKRSWTS AQNACSEH-G-ATLAVT DSEKDMN FLKRYAG----REEHVGLKKEP GHPwksngke fnnwfnvt g-----DKCVFLKNT---EVSSMECEKNLYWICNKPYk<br/>       --CPLGSSFDQHCYKVFEPVKNWTEAEEICMQQhKgSRLASLHSEEEAFVSKLASKalkFTSMWIGLNNPWKDC-----kwewsdnarfdyawkrrPYCTVMVVKpdr iFWFTRGCEKSVSFVCKFLT-</p> <p><b>SARST:</b> aliSize=112 (resi) RMSD=9.68 (Å)<br/>       ssc-SEDVVG YQRKCYFISTVKRSWTS AQNACSEH--GATLAVT DSEKDMN FLKRYAGR----EEHVGLKKEP GHPWkwsngke fnnwfnvt TGS DKCVFLKNT---VSSMECEKNLYWICNKPYk<br/>       ---cPLGSSFDQHCYKVFEPVKNWTEAEEICMQQhKgSRLASLHSEEEAFVSKLASKalkFTSMWIGLNNPWKDCNEWSDNARDYKAWKRRPYCTVMVVKPDR iFWFTRGCEKSVSFVCKFLt--</p> <p><b>BLAST:</b> aliSize=57 (resi) iden=27.35% (32/117) simi=48.72% (57/117)<br/>       ssc-SEDVVG YQRKCYFISTVKRSWTS AQNACSEH--GATLAVT DSEKDMN FLKRYAGRE----EEHVGLKKEP GHPW-----WS-NGK-EFNWfnvt TGS DKCVFLKNT---VSSMECEKNLYWICNKPYk<br/>       --CPLGSSFDQHCYKVFEPVKNWTEAEEICMQQhKgSRLASLHSEEEAFVSKLASKalkFTSMWIGLNNPWKDCNEWSDNARDYKAWKRRPYCTVMVVKPDR iFWFTRGCEKSVSFVCKFLt----</p> <p><b>Proposed:</b> aliSize=111 (resi) RMSD=1.67 (Å)<br/>       ssc-SEDVVG YQRKCYFISTVKRSWTS AQNACSEH-G-ATLAVT DSEKDMN FLKRYAG----REEHVGLKKEP GHPWkwsngke fnnwfnvt TGS-dKCVFLKNT---EVSSMECEKNLYWICNKPYk<br/>       --CPLGSSFDQHCYKVFEPVKNWTEAEEICMQQhKgSRLASLHSEEEAFVSKLASKalkFTSMWIGLNNPWKDCNEWSDNARDY-KAWKRRP-YCTVMVVKpdr iFWFTRGCEKSVSFVCKFLT-</p>                           |
| 1003 | <p>1e87A (117)</p> <hr/> <p>lukmA (131)</p> | M | 24.79 | <p><b>TM-align:</b> aliSize=98 (resi) RMSD=2.07 (Å)<br/>       ssc-SEDVVG YQRKCYFISTVKRSWTS AQNACSEH-G-ATLAVT DSEKDMN FLKRYAG--R---E-EHVGLKKEP-G-HPwksngke fnnwfnvt g-----SDKCVFLKN---EVSSMECEKNLYWICNKPYk<br/>       -DCPSDWTADQHCYLAIGEPQNYEAERFCTEQAKdGHVLSIQSREEGNFVAQLVSGfMhrs iYVWIGLRDRReEqQC-----npewndgskiiyvnwkegESKMQGTKwtNfhDWNINCELDYPFVCKFSA-</p> <p><b>SARST:</b> aliSize=113 (resi) RMSD=9.22 (Å)<br/>       ssc-SEDVVG YQRKCYFISTVKRSWTS AQNACSEH--GATLAVT DSEKDMN FLKRYAGR----KRYAGRE-EHVGLKKEP-G-HPWkwsngke fnnwfnvt TGS DKCVFLKN---TEVSSMECEKNLYWICNKPYk<br/>       --dCPSDWTADQHCYLAIGEPQNYEAERFCTEQAKdGHVLSIQSREEGNFVAQLVSGfMhrs iYVWIGLRDRReEqQCENPNDISKI IYVNWKEGESKMQGTKwtNfhDWNINCELDYPFVCKFSA--</p> <p><b>BLAST:</b> aliSize=64 (resi) iden=31.62% (37/117) simi=54.70% (64/117)<br/>       ssc-SEDVVG YQRKCYFISTVKRSWTS AQNACSEHGAT--LAVT DSEKDMN FLKRYAGR----REEHVGLKKEP-G-HPWkwsngke fnnwfnvt TGS DKCVFLKN---EVSSMECEKNLYWICNKPYk<br/>       --dCPSDWTADQHCYLAIGEPQNYEAERFCTEQAKdGHVLSIQSREEGNFVAQLVSGfMhrs iYVWIGLRDRReEqQCENPNDISKI IYVNWKEGESKMQGTKwtNfhDWNINCELDYPFVCKFSA-----</p> <p><b>Proposed:</b> aliSize=113 (resi) RMSD=1.60 (Å)<br/>       ssc-SEDVVG YQRKCYFISTVKRSWTS AQNACSEH-G-ATLAVT DSEKDMN FLKRYAG--R---E-EHVGLKKEP-G-HPWkwsngke fnnwfnvt TGS DKCVFLKN---EVSSMECEKNLYWICNKPYk<br/>       -DCPSDWTADQHCYLAIGEPQNYEAERFCTEQAKdGHVLSIQSREEGNFVAQLVSGfMhrs iYVWIGLRDRReEqQCENPNDISKI IYVNWKEGESKMQGTKwtNfhDWNINCELDYPFVCKFSA-</p> |
| 1004 | <p>1e87A (117)</p> <hr/> <p>luexA (125)</p> | M | 26.50 | <p><b>TM-align:</b> aliSize=95 (resi) RMSD=1.76 (Å)<br/>       ssc-SEDVVG YQRKCYFISTVKRSWTS AQNACSEHGATLAVT DSEKDMN FLKRYAG-----R-EEHVGLKKEP GHPwksngke fnnwfnvt g-----SDKCVFLK-N-TEVSSMECEKNLYWICNKPYk<br/>       -GCLPDWSSYKGHCKVFKKVGTVEDA EKFCVENSGLHLSIDSKEEADVTKLASqt ltkFvYDAWIGLRDESKT-----qqcspqawtdgssvvyendePTKCFGdVhtEYRTWTDLPGEKNPFICKS----</p> <p><b>SARST:</b> aliSize=110 (resi) RMSD=8.79 (Å)<br/>       ssc-SEDVVG YQRKCYFISTVKRSWTS AQNACSEHGATLAVT DSEKDMN FLKRYAG-----GREEHVGLKKEP GHPW---KWSNGKEFNWfnvt TGS DKCVFLKN---TEVSSMECEKNLYWICNKPYk<br/>       --gCLPDWSSYKGHCKVFKKVGTVEDA EKFCVENSGLHLSIDSKEEADVTKLASqt ltkFvYDAWIGLRDESKTQQCSPQWTDGSSVYVY-ENVDEPTKCFGdVhtEYRTWTDLPGEKNPFICKS----</p> <p><b>BLAST:</b> aliSize=60 (resi) iden=31.62% (37/117) simi=51.28% (60/117)<br/>       ssc-SEDVVG YQRKCYFISTVKRSWTS AQNACSEHGATLAVT DSEKDMN FLKRYAGRE-----EEHVGLKKEP GHPW---HPWkwsngke fnnwfnvt TGS DKCVFLKN---SSMECEKNLYWICNKPYk<br/>       --gCLPDWSSYKGHCKVFKKVGTVEDA EKFCVENSGLHLSIDSKEEADVTKLASqt ltkFvYDAWIGLRDESKTqqCSPQWTDGSSVYVY-ENVDEPTKCFGdVhtEYRTWTDLPGEKNPFICKS-----</p> <p><b>Proposed:</b> aliSize=112 (resi) RMSD=1.64 (Å)<br/>       ssc-SEDVVG YQRKCYFISTVKRSWTS AQNACSEHGATLAVT DSEKDMN FLKRYAG-----R-EEHVGLKKEP GHPW---HPWkwsngke fnnwfnvt TGS DKCVFLK-N-TEVSSMECEKNLYWICNKPYk<br/>       -GCLPDWSSYKGHCKVFKKVGTVEDA EKFCVENSGLHLSIDSKEEADVTKLASqt ltkFvYDAWIGLRDESKTqqCSPQWTDGSSVYVY-ENVDEPTKCFGdVhtEYRTWTDLPGEKNPFICKS----</p>    |

|      |                                             |   |       |                                                                                                                                                                                                                                                                                                                                                                                                                                                                                                                                                                                                                                                                                                                                                                                                                                                                                                                                                                                                                                                                                                                                                                                                                                                                                                                                                                   |
|------|---------------------------------------------|---|-------|-------------------------------------------------------------------------------------------------------------------------------------------------------------------------------------------------------------------------------------------------------------------------------------------------------------------------------------------------------------------------------------------------------------------------------------------------------------------------------------------------------------------------------------------------------------------------------------------------------------------------------------------------------------------------------------------------------------------------------------------------------------------------------------------------------------------------------------------------------------------------------------------------------------------------------------------------------------------------------------------------------------------------------------------------------------------------------------------------------------------------------------------------------------------------------------------------------------------------------------------------------------------------------------------------------------------------------------------------------------------|
| 1005 | <p>1e87A (117)</p> <hr/> <p>1j34B (123)</p> | M | 23.08 | <p><b>TM-align:</b> aliSize=97 (resi) RMSD=1.80 (Å)<br/> sSSEDVVG YQRKCYFISTVKRSWTSQNAACSEH-G-ATLAVIDSEKDMNFKRYAG---REEHVVGLKKE-PGHPwkwsngkefnnwfnvtgs-----DKCVFLK-NT-EVSSMECEKNLYWICNKPYk<br/> -DGPSWSSYEGHCYKPFSEPKNWADAENFCTQqhAgGHLVVSFOSSEEADFFVVKLAFqtfgHSIFWGLSNVwNQC-----wqwsnaamlrykawAeSYCVYFksTNkWRRAIRMAQFVCEfQA-</p> <p><b>SARST:</b> aliSize=104 (resi) RMSD=9.02 (Å)<br/> ssc--SEDVVG YQRKCYFISTVKRSWTSQNAACSEH--GATLAVIDSEKDMNFKRYA----REEHVVGLKkepG---HPWKSNGKEFNnwfnvTGSDKC---VFLKNT--VSSMECEKNLYWICNKPY-k<br/> ---dcPSDWSSYEGHCYKPFSEPKNWADAENFCTQqhAgGHLVVSFOSSEEADFFVVKLAFqtfgHSIFWGLSNVwNQCWQWSNAAMLR-----YKAWAeSycYFSTNkWRRAIRMAQFVCEfQA--</p> <p><b>BLAST:</b> aliSize=51 (resi) iden=27.35% (32/117) simi=43.59% (51/117)<br/> ss--SEDVVG YQRKCYFISTVKRSWTSQNAACSEH--GATLAVIDSEKDMNFKRYA----REEHVVGLKKEPGH-PWKSNGK---EFNNfnvTGSDKCVFLK--NTEVSSMECEKNLYWIC----nkpyk<br/> --dCPSDWSSYEGHCYKPFSEPKNWADAENFCTQqhAgGHLVVSFOSSEEADFFVVKLAFqtfgHSIFWGLSNVwNQCWQWSNAAMLRKYA---AEESYCVYFkstNKWRRAIRMAQFVCEfqa-----</p> <p><b>Proposed:</b> aliSize=113 (resi) RMSD=1.62 (Å)<br/> sSSEDVVG YQRKCYFISTVKRSWTSQNAACSEH-G-ATLAVIDSEKDMNFKRYAG---REEHVVGLKKEP-GHPWKSNGKEFNnwfnvTG-SdKCVFL-KNT-EVSSMECEKNLYWICNKPYk<br/> -DGPSWSSYEGHCYKPFSEPKNWADAENFCTQqhAgGHLVVSFOSSEEADFFVVKLAFqtfgHSIFWGLSNVwNQCWQWSNAAMLR-YKAWAeS-YCVYFkSTNkWRRAIRMAQFVCEfQA-</p> |
| 1006 | <p>1e87A (117)</p> <hr/> <p>1jwiB (123)</p> | M | 19.66 | <p><b>TM-align:</b> aliSize=97 (resi) RMSD=1.54 (Å)<br/> sSSEDVVG YQRKCYFISTVKRSWTSQNAACSEH-G-ATLAVIDSEKDMNFKRYAG---REEHVVGLKKE-PGHPwkwsngkefnnwfnvtgs-----DKCVFLKNT--EVSSMECEKNLYWICNKPYk<br/> -GCLPDWSSYKGHCKVFKVEKTWADA EKFKELvngGHLMSVNSREEGEFISKLALEkmrIVLVWIGLSHFWRIC-----plrwtgdarldyralsdePICFVAESFhnKWIQWTNRKKSfVCKYRV-</p> <p><b>SARST:</b> aliSize=111 (resi) RMSD=8.93 (Å)<br/> ss--SEDVVG YQRKCYFISTVKRSWTSQNAACSEH--GATLAVIDSEKDMNFKRYAG---EEHVVGLKKE-PGHPWKSNGKEFNnwfnvTGSDKCVFLK--NTEVSSMECEKNLYWICNKPY-k<br/> --gCLPDWSSYKGHCKVFKVEKTWADA EKFKELvngGHLMSVNSREEGEFISKLALEkmrIVLVWIGLSHFWRICPLRWTDAARLD--YRALSDEPICFVAESfHNKWIQWTNRKKSfVCKYRV--</p> <p><b>BLAST:</b> aliSize=53 (resi) iden=24.79% (29/117) simi=45.30% (53/117)<br/> ss--SEDVVG YQRKCYFISTVKRSWTSQNAACSEH--GATLAVIDSEKDMNFKRYAG---EEHVVGLKKE-PGHPWKSNGKEFNnwfnvTGSDKCVFLK--NTEVSSMECEKNLYWICNKPY-k<br/> --gCLPDWSSYKGHCKVFKVEKTWADA EKFKELvngGHLMSVNSREEGEFISKLALEkmrIVLVWIGLSHFWRICPLRWTDAARLD--YRALSDEPICFVAESfHNKWIQWTNRKKSfVCKYRV--</p> <p><b>Proposed:</b> aliSize=114 (resi) RMSD=1.67 (Å)<br/> sSSEDVVG YQRKCYFISTVKRSWTSQNAACSEH-G-ATLAVIDSEKDMNFKRYAG---REEHVVGLKKE-PGHPWKSNGKEFNnwfnvTGSDKCVFLKNT--EVSSMECEKNLYWICNKPYk<br/> -GCLPDWSSYKGHCKVFKVEKTWADA EKFKELvngGHLMSVNSREEGEFISKLALEkmrIVLVWIGLSHFWRICPLRWTDAARLDYRALSDEPICFVAESFhnKWIQWTNRKKSfVCKYRV-</p>            |
| 1007 | <p>1e87A (117)</p> <hr/> <p>1v4IB (125)</p> | M | 22.22 | <p><b>TM-align:</b> aliSize=98 (resi) RMSD=1.72 (Å)<br/> -SSSEDVVG YQRKCYFISTVKRSWTSQNAACSEH-G-ATLAVIDSEKDMNFKRYAG---REEHVVGLKKEPGHPwkwsngkefnnwfnvtgs-----DKCVFLK-NT-EVSSMECEKNLYWICNKPYk<br/> gFCPLGSSYDEHCYQVFOQMNWEDA EKFKCTQqhRgSHLVSFHSSEEVDFFVSKTSpilkHDFVWGLSNVWNEC-----akewsdgtklDYKawsggSDCITStTDnQWLSMDCSSKRIVVCKfQA-</p> <p><b>SARST:</b> aliSize=104 (resi) RMSD=9.61 (Å)<br/> sscsed-----VVG YQRKCYFISTVKRSWTSQNAACSEH--GATLAVIDSEKDMNFKR---YAGREEHVVGLKkepG---HPWKSNGKEFNnwfnvTGSDKC-VFLKNT--VSSMECEKNLYWICNKPY-k<br/> -----gfcplgSSYDEHCYQVFOQMNWEDA EKFKCTQqhRgSHLVSFHSSEEVDFFVSKTSpilkHDFVWGLSNVWNEC-----YKAWSGQSDCITStTDnQWLSMDCSSKRIVVCK-fQA-</p> <p><b>BLAST:</b> aliSize=55 (resi) iden=27.35% (32/117) simi=47.01% (55/117)<br/> ss---SEDVVG YQRKCYFISTVKRSWTSQNAACSEH--GATLAVIDSEKDMNFKRYAG---REEHVVGLKKEPGHPWKSNGK---EFNNWfnvTGSDKCVFLKNT-EVSSMECEKNLYWIC----nkpyk<br/> --gfcPLGSSYDEHCYQVFOQMNWEDA EKFKCTQqhRgSHLVSFHSSEEVDFFVSKTSpilkHDFVWGLSNVWNEC-----YKAWSGQSDCITStTDnQWLSMDCSSKRIVVCKfqa-----</p> <p><b>Proposed:</b> aliSize=115 (resi) RMSD=1.81 (Å)<br/> -SSSEDVVG YQRKCYFISTVKRSWTSQNAACSEH-G-ATLAVIDSEKDMNFKRYAG---REEHVVGLKKEPGHPWKSNGKEFNnwfnvTGSDKCVFL-KNT-EVSSMECEKNLYWICNKPYk<br/> gFCPLGSSYDEHCYQVFOQMNWEDA EKFKCTQqhRgSHLVSFHSSEEVDFFVSKTSpilkHDFVWGLSNVWNEC-----YKAWSGQSDCITStTDnQWLSMDCSSKRIVVCKfQA-</p>             |



|      |                                                           |   |       |                                                                                                                                                                                                                                                                                                                                                                                                                                                                                                                                                                                                                                                                                                                                                                                                                                                                                                                                                                                                                                                                                                                                                                                                                                                                                                                                                                                                    |
|------|-----------------------------------------------------------|---|-------|----------------------------------------------------------------------------------------------------------------------------------------------------------------------------------------------------------------------------------------------------------------------------------------------------------------------------------------------------------------------------------------------------------------------------------------------------------------------------------------------------------------------------------------------------------------------------------------------------------------------------------------------------------------------------------------------------------------------------------------------------------------------------------------------------------------------------------------------------------------------------------------------------------------------------------------------------------------------------------------------------------------------------------------------------------------------------------------------------------------------------------------------------------------------------------------------------------------------------------------------------------------------------------------------------------------------------------------------------------------------------------------------------|
| 1008 | <p><b>1e87A (117)</b></p> <hr/> <p><b>liodA (129)</b></p> | M | 23.08 | <p><b>TM-align: aliSize=95 (resi) RMSD=1.80 (Å)</b><br/> sSCEdVVGyQRKCYFISTVKRSWTSQNACSEH-G-ATLAVTDSKDMNFKRYAG---RE---EHVGLKKEP---GHPwkwngkefnwfnvtg-----SDKCVFLKN-1---EVSSMECEKNLYWICNKpyk<br/> -DSSGSSSEGHCKVFKQSKTADAESFETKQvNgGHLVSESSGEADFVGLIAqkiKSakiHVVIGLRAQnkekqCS-----ewsdgssisyenwieeESKCLGVHIEtghfKWENFYCEQDPFVCEA---</p> <p><b>SARST: aliSize=106 (resi) RMSD=10.35 (Å)</b><br/> ss-CSEdVVGyQRKCYFISTVKRSWTSQNACSEH--GATLAVTDSKDMNFKRYAGREEHWVGLKKEPGHPW-----KWSNGKEFNnwfnvtGSD-----KCVFLKNT---EVSSMECEKNLYWICN-kpyk<br/> --dCSSGSSSEGHCKVFKQSKTADAESFETKQvNgGHLVSESSGEADFVGLIAQKIKSAKIHWVIGLRAQnkekqcsiEWSGSSIS-----YENWIEEskKCLGVHIEtghfKWENFYCEQDPFVCEA---</p> <p><b>BLAST: aliSize=59 (resi) iden=28.21% (33/117) simi=50.43% (59/117)</b><br/> ss-CSEdVVGyQRKCYFISTVKRSWTSQNACSE--HGATLAVTDSKDMNFKRYAGREEH-VVGLK---KEPGHPWWSNGKE--FNNWFNVTGSDKCVFLK-N-EVSSME---CEKNLYWIC--nkpyk<br/> --dCSSGSSSEGHCKVFKQSKTADAESFETKqNCGHLVSESSGEADFVgqliaQKIKSAKIHWVIGLRaQnKEKQCSIEWSGSSISYENWIEEESKCLGVHIEtghfKWENFYCEQDPFVCEA-----</p> <p><b>Proposed: aliSize=111 (resi) RMSD=1.50 (Å)</b><br/> sSCEdVVGyQRKCYFISTVKRSWTSQNACSEH-G-ATLAVTDSKDMNFKRYAG---RE---EHVGLKKEP---GHPwKWSNGKEFNwfnvtGSDKCVFLKN-1---EVSSMECEKNLYWICNKpyk<br/> -DSSGSSSEGHCKVFKQSKTADAESFETKQvNgGHLVSESSGEADFVGLIAqkiKSakiHVVIGLRAQnkekqCSI-EWSGSSIS-YENWIEEESKCLGVHIEtghfKWENFYCEQDPFVCEA---</p>                      |
| 1009 | <p><b>1e87A (117)</b></p> <hr/> <p><b>luosA (133)</b></p> | M | 26.50 | <p><b>TM-align: aliSize=98 (resi) RMSD=1.92 (Å)</b><br/> sSCEdVVGyQRKCYFISTVKRSWTSQNACSEHG--ATLAVTDSKDMNFKRYAG---R---EEHWVGLKKEPGHPwkwngkefnwfnvtg-----SDKCVFLKN-1---EVSSMECEKNLYWICNKPYK-<br/> -HCPSDWYYDQHCYRFNEEMNVEDAEWFWTKQakGHLVSKSAKEADFAWMVTQnieEsfSHVSIGLRVQNKKE-----kqcsstkwsdgsvsydnldlyITKCSLLKKeTgfrKWFVASCIGKIPFVCKFPQC</p> <p><b>SARST: aliSize=110 (resi) RMSD=9.32 (Å)</b><br/> ss-CSEdVVGyQRKCYFISTVKRSWTSQNACSEH--GATLAVTDSKDMNFKRYAGREE-----HWVGLKKEPGHPW---PWKWSNGKEFNwfnvtGSD---KCVFLKNT---EVSSMECEKNLYWICNKPY--k<br/> --hCPSDWYYDQHCYRFNEEMNVEDAEWFWTKQakGHLVSKSAKEADFAWMVTQnieEsfshVSIGLRVQNKKEKqcsTKWSGSSVS--YDNLldlyITKC--SLKKEtGfrKWFVASCIGKIPFVCKFPqc-</p> <p><b>BLAST: aliSize=50 (resi) iden=27.35% (32/117) simi=42.74% (50/117)</b><br/> ss-CSEdVVGyQRKCYFISTVKRSWTSQNACSEH--GATLAVTDSKDMNFKRYAGR---EEHW---VGLK---KEPGHPWWSNGKE--EFNNWFNVTGSDKCVFLK-----ntevssmeceknlywcnkpyk<br/> --hCPSDWYYDQHCYRFNEEMNVEDAEWFWTKQakGHLVSKSAKEADFAWMVTQnieEsfshVSIGLRVqNKEKQCSSTKWSGSSVSyDNLldlyITKCSLLKketgfrkrfwvascigkipfvckfpqc-----</p> <p><b>Proposed: aliSize=114 (resi) RMSD=1.58 (Å)</b><br/> sSCEdVVGyQRKCYFISTVKRSWTSQNACSEHG--ATLAVTDSKDMNFKRYAG-----rEEHWVGLKKEPG---HPWkWSNGKEFNwfnvtGSDKCVFLKN-1---EVSSMECEKNLYWICNKPYK-<br/> -HCPSDWYYDQHCYRFNEEMNVEDAEWFWTKQakGHLVSKSAKEADFAWMVTQnieEsfSHVSIGLRVQNKKEKqcsTKWSGSSVSyDNLldlyITKCSLLKKeTgfrKWFVASCIGKIPFVCKFPQC</p> |
| 1010 | <p><b>1e87A (117)</b></p> <hr/> <p><b>lj34A (129)</b></p> | M | 21.37 | <p><b>TM-align: aliSize=95 (resi) RMSD=1.74 (Å)</b><br/> sSCEdVVGyQRKCYFISTVKRSWTSQNACSEH-G-ATLAVTDSKDMNFKRYAG---R---EEHWVGLKKEP-E-P--GHPwkwngkefnwfnvt-----GSDKCVFLKN-1---EVSSMECEKNLYWICNKpyk<br/> -DCPGSSSEGHCKPFLYKTDDAERFTEQaKgGHLVSESSAGEADFVAQLVTeniqtKSYVWIGLRVqGkEkqC-----ssewsdgssvsyenwieeESKTLGLEKtGfrKWNLYCGQONPFVCEA---</p> <p><b>SARST: aliSize=109 (resi) RMSD=8.85 (Å)</b><br/> ss-CSEdVVGyQRKCYFISTVKRSWTSQNACSEH--GATLAVTDSKDMNFKRYAG-----REEHWVGLKkePGHPWWSNGKEFNwfnvtGSD-----KCVFLKN---TEVSSMECEKNLYWICN-kpyk<br/> --dCPGSSSEGHCKPFLYKTDDAERFTEQakGHLVSESSAGEADFVAQLVTeniqtKSYVWIGLR--VQGEKQCSSEWSGSSVSyENWIEaESKTLGLEKtGfrKWNLYCGQONPFVCEA---</p> <p><b>BLAST: aliSize=48 (resi) iden=24.79% (29/117) simi=41.03% (48/117)</b><br/> ss-CSEdVVGyQRKCYFISTVKRSWTSQNACSEH--GATLAVTDSKDMNFKRYA-----GREEH-VVGLK---KEPGHPWWSNGKE--FNNWFNVTGSDKCVFLK-N-----evssmeceknlywcnkpyk<br/> --dCPGSSSEGHCKPFLYKTDDAERFTEQakGHLVSESSAGEADFVAQLVTeniqtKSYVWIGLRvqgKEKQCSSEWSGSSVSyENWIEAE-SKTLGLEKtGfrkwnlycgqonpfvcea-----</p> <p><b>Proposed: aliSize=109 (resi) RMSD=1.50 (Å)</b><br/> sSCEdVVGyQRKCYFISTVKRSWTSQNACSEH-G-ATLAVTDSKDMNFKRYAG---R---EEHWVGLKKEP-----epgHPWWSNGKEFNwfnvtGSDKCVFLKNTE---VSSMECEKNLYWICNKpyk<br/> -DCPGSSSEGHCKPFLYKTDDAERFTEQaKgGHLVSESSAGEADFVAQLVTeniqtKSYVWIGLRVqgkEkq--CSSEWSGSSVS-YENWIEaESKTLGLEKtGfrkwnlycgqonpfvcea---</p>                            |

|      |                                               |   |       |                                                                                                                                                                                                                                                                                                                                                                                                                                                                                                                                                                                                                                                                                                                                                                                                                                                                                                                                                                                                                                                                                                                                                                                                                                                                                                                                                                                                                                                                          |
|------|-----------------------------------------------|---|-------|--------------------------------------------------------------------------------------------------------------------------------------------------------------------------------------------------------------------------------------------------------------------------------------------------------------------------------------------------------------------------------------------------------------------------------------------------------------------------------------------------------------------------------------------------------------------------------------------------------------------------------------------------------------------------------------------------------------------------------------------------------------------------------------------------------------------------------------------------------------------------------------------------------------------------------------------------------------------------------------------------------------------------------------------------------------------------------------------------------------------------------------------------------------------------------------------------------------------------------------------------------------------------------------------------------------------------------------------------------------------------------------------------------------------------------------------------------------------------|
| 1011 | <p>1p4ID<br/>(122)</p> <p>1ukmA<br/>(131)</p> | M | 19.67 | <p><b>TM-align:</b> aliSize=97 (resi) RMSD=2.12 (Å)<br/> rgvk----YFCYSTKCYFYFMNKTITSGCKANCOHYG--VPILKTEDEDELKFLQRHVI-I-P---G-NYWIIGLSYDKKKKEwawidngpsklmkiikk-MNFK-----SRGCVFLS---K-ARIEDIDCNIPYYCICGKKLdk<br/> ----dcpsdYTAIDQHCYLAIGEPONWYEAERFTEQakdGHLVSIQSREEGNVAQLVSGfMhrsEiYVWIGLRDRRE-E-----qQCNPewndgskiiyvNwkegeSKMCQGtktwnfHDWNNINCEDLYPFVCKFSA--</p> <p><b>SARST:</b> aliSize=89 (resi) RMSD=8.04 (Å)<br/> rgvkyw----FCYSTKCYFYFMNKTITSGCKANCOHYG--GVPILKTEDEDELKFLQRHVI-I-P---G-NYWIIGLSYDKKKKEWAWIDNG-----PSklmkiikkmfksrgcvflskariEDIDCNIPYYCICGKKLdk<br/> ----dcpsdwTAYDQHCYLAIGEPONWYEAERFTEQakdGHLVSIQSREEGNVAQLVSGfMhrsEiYVWIGLRDRREEQCNPEWIDGSKiiyvNwkegeskmcqglktkwnfhdw-----NNINCEDLYPFVCKFSA--</p> <p><b>BLAST:</b> aliSize=53 (resi) iden=25.41% (31/122) simi=43.44% (53/122)<br/> rgvky-----FCYSTKCYFYFMNKTITSGCKANCOHYG--VPILKTEDEDELKFLQRHVI-I-P---G-NYWIIGLSYDKKKKEWAWIDNGPSKLDMKIKKMNFKSRGCVFLS---K-ARIEDIDCNIPYYCICGKKLdk<br/> ----dcpsdYTAIDQHCYLAIGEPONWYEAERFTEQakdGHLVSIQSREEGNVAQLVSGfMhrsEiYVWIGLRDRREEQCNPEWIDGSKII-YVNWKEGESKMCQGLTWNFHDWNNINCEDLYPFVCKFSA-----</p> <p><b>Proposed:</b> aliSize=110 (resi) RMSD=2.10 (Å)<br/> rgvk----YFCYSTKCYFYFMNKTITSGCKANCOHYG--VPILKTEDEDELKFLQRHVI-I-P---G-NYWIIGLSYDKK--kkEW-AIDNGPSKLDMKI-KKmnfkSRGCVFLS---K-ARIEDIDCNIPYYCICGKKLdk<br/> ----dcpsdYTAIDQHCYLAIGEPONWYEAERFTEQakdGHLVSIQSREEGNVAQLVSGfMhrsEiYVWIGLRDRREeqq--CNPEWIDGSKIIYVNWKeGE---SKMCQGtktwnfHDWNNINCEDLYPFVCKFSA--</p> |
| 1012 | <p>1p4ID<br/>(122)</p> <p>1j34B<br/>(123)</p> | M | 15.57 | <p><b>TM-align:</b> aliSize=96 (resi) RMSD=1.94 (Å)<br/> rgvk----YFCYSTKCYFYFMNKTITSGCKANCOHYG--VPILKTEDEDELKFLQRHVI---PGNYWIIGLS-YDKkkKEwawidngpsklmkiikkNF-----K--SRGCVFLS-KA-RIEDIDCNIPYYCICGKKLdk<br/> ----dcpsdYSSYEGHCYKPFSEPKNWADAENFTQqHagGHLVVSFQSSEADVVKLAfqtfgHSIFWMLSNVWN--QC-----NwqwsnaamlrykaWaeESYCYFKsTNnKWRSRARMMAQFVCEFOA--</p> <p><b>SARST:</b> aliSize=109 (resi) RMSD=9.13 (Å)<br/> rgvky-----FCYSTKCYFYFMNKTITSGCKANCOHYG--GVPILKTEDEDELKFLQRHVI---HVIIPGNWIGLSYDKKKKEWAWIDNGPSKLDmkiikkNFKSRGCVFLSKAR--IEDIDCNIPYYCICGKKLdk<br/> ----dcpsdYSSYEGHCYKPFSEPKNWADAENFTQqHagGHLVVSFQSSEADVVKLAfqtfgHSIFWMLSNVWNQCNSNAAMLRY----KAWAEESYCYFKSTNnKWRSRARMMAQFVCEFOA--</p> <p><b>BLAST:</b> aliSize=30 (resi) iden=14.75% (18/122) simi=24.59% (30/122)<br/> rgvky-----FCYSTKCYFYFMNKTITSGCKANCOHYG--VPILKTEDEDELKFLQRHVI---GNYWIIGLSYDKKKKEWAWIDNGPSKLDmkiikkNFKSRGCVFLSKARIEDIDCNIPYYCICGKKLdk<br/> ----dcpsdYSSYEGHCYKPFSEPKNWADAENFTQqHagGHLVVSFQSSEADVVKLAfqtfgHSIFWMLSNVWNQCNSNAAMLRYKAWAEESYCYFKSTNnKWRSRARMMAQFVCEFOA-----</p> <p><b>Proposed:</b> aliSize=109 (resi) RMSD=2.06 (Å)<br/> rgvk----YFCYSTKCYFYFMNKTITSGCKANCOHYG--VPILKTEDEDELKFLQRHVI---PGNYWIIGLSYDKKKKEWAWIDNGPSKLDMKIKK-nfkSRGCVFLS-KA-RIEDIDCNIPYYCICGKKLdk<br/> ----dcpsdYSSYEGHCYKPFSEPKNWADAENFTQqHagGHLVVSFQSSEADVVKLAfqtfgHSIFWMLSNVWNQCNSNAAMLRYKAWAEESYCYFKSTNnKWRSRARMMAQFVCEFOA--</p>                                                                                |
| 1013 | <p>1p4ID<br/>(122)</p> <p>1jwiB<br/>(123)</p> | M | 16.39 | <p><b>TM-align:</b> aliSize=97 (resi) RMSD=1.86 (Å)<br/> rgvk----YFCYSTKCYFYFMNKTITSGCKANCOHYG--VPILKTEDEDELKFLQRHVI---PGNYWIIGLSYDKKKKEwawidngpsklmkiikkmn-----FKS--RGCVFLSKA--RIEDIDCNIPYYCICGKKLdk<br/> ----gc1pdYSSYKGHYKVFVKVEKTWADA EKFKELVngGHLMSVNSREEGEISKLALekmrIVLVWIGLSHFWRICPLRITD GARLDY-----RALSDEPICFVAESFhnKWIQWTCNRKKS FVCKYRV--</p> <p><b>SARST:</b> aliSize=111 (resi) RMSD=8.97 (Å)<br/> r-GVKYFCYSTKCYFYFMNKTITSGCKANCOHYG--GVPILKTEDEDELKFLQRHVIIPGNWIGLSYDKKKKEWAWIDNGPSKLDmkiikkNFKSRGCVFLS---KARIEDIDCNIPYYCICGKKLdk<br/> -gCLPDYSSYKGHYKVFVKVEKTWADA EKFKELVngGHLMSVNSREEGEISKLALekmrIVLVWIGLSHFWRICPLRITD GARLDY-----RALSDEPICFVAESFhnKWIQWTCNRKKS FVCKYRV--</p> <p><b>BLAST:</b> aliSize=36 (resi) iden=15.57% (19/122) simi=29.51% (36/122)<br/> rgvky-----FCYSTKCYFYFMNKTITSGCKANCOHYG--VPILKTEDEDELKFLQRHVIIPGNWIGLSYDKKKKEWAWIDNGPSKLDMKI-----ikkmfksrgcvflskariEDIDCNIPYYCICGKKLdk<br/> ----gc1pdYSSYKGHYKVFVKVEKTWADA EKFKELVngGHLMSVNSREEGEISKLALekmrIVLVWIGLSHFWRICPLRITD GARLDYRALSDEPICFVAESFhnKWIQWTCNRKKS FVCKYRV-----</p> <p><b>Proposed:</b> aliSize=110 (resi) RMSD=1.70 (Å)<br/> rgvk----YFCYSTKCYFYFMNKTITSGCKANCOHYG--VPILKTEDEDELKFLQRHVI---PGNYWIIGLSYDKKKKEWAWIDNGPSKLDMKIK-kmnfkSRGCVFLSKA--RIEDIDCNIPYYCICGKKLdk<br/> ----gc1pdYSSYKGHYKVFVKVEKTWADA EKFKELVngGHLMSVNSREEGEISKLALekmrIVLVWIGLSHFWRICPLRITD GARLDYRALSDE-----PICFVAESFhnKWIQWTCNRKKS FVCKYRV--</p>                                                    |

|      |                                               |   |       |                                                                                                                                                                                                                                                                                                                                                                                                                                                                                                                                                                                                                                                                                                                                                                                                                                                                                                                                                                                                                                                                                                                                                                                                                                                                                                                                                                                                                                                                                                                                  |
|------|-----------------------------------------------|---|-------|----------------------------------------------------------------------------------------------------------------------------------------------------------------------------------------------------------------------------------------------------------------------------------------------------------------------------------------------------------------------------------------------------------------------------------------------------------------------------------------------------------------------------------------------------------------------------------------------------------------------------------------------------------------------------------------------------------------------------------------------------------------------------------------------------------------------------------------------------------------------------------------------------------------------------------------------------------------------------------------------------------------------------------------------------------------------------------------------------------------------------------------------------------------------------------------------------------------------------------------------------------------------------------------------------------------------------------------------------------------------------------------------------------------------------------------------------------------------------------------------------------------------------------|
| 1014 | <p>1p4ID<br/>(122)</p> <p>1v4IB<br/>(125)</p> | M | 17.21 | <p><b>TM-align:</b> aliSize=95 (resi) RMSD=1.89 (Å)<br/> rgvk-----YFCYSTKCYFYIMNKTITWSGCKANQHYG--VPILKTEDEDELKFLQRHV--I-P-GNYNIGLS-YDKKKKEwawidngpsklmki kkmf-----K--SRGCVFLS-KA-RIEDIDCNIPYCYICGKkLdk<br/> -----gfccplGSSYDEHCYQVFOQMNVEDAEKFTQQRhgSHLVSFHSSEVDFVVSktspIkhDFVVMGLSNVWNECAKEWSDGKLDYKAWSGQSDCITSKtTDnQWLSMDCSSKRYVVKFQA--</p> <p><b>SARST:</b> aliSize=109 (resi) RMSD=11.16 (Å)<br/> rgvkyw-----FCYSTKCYFYIMNKTITWSGCKANQHY--VPIKTEDEDELKFLQRH----HVIPGNYNIGLSYDKKKKEWAIDNGPSKL-DMKI KKMNFksRGCVfIskaRIEDIDCNIPYCYICGKk-Ldk<br/> -----gfccplGSSYDEHCYQVFOQMNVEDAEKFTQQRhSHLVSFHSSEVDFVVSktspIkhDFVVMGLSNVWNECAKEWSDGKLDYKAWSGQSDCITSKTTD----NQWLSMDCSSKRYVVKFQA--</p> <p><b>BLAST:</b> aliSize=54 (resi) iden=27.05% (33/122) simi=44.26% (54/122)<br/> rgvky-----YFCYSTKCYFYIMNKTITWSGCKANQHY--VPILKTEDEDELKFLQRHV--I-P-GNYNIGLS-YDKKKKEwawidngpsklmki kkmf-----K--SRGCVFLS-KA-RIEDIDCNIPYCYICGKkLdk<br/> -----gfccplGSSYDEHCYQVFOQMNVEDAEKFTQQRhSHLVSFHSSEVDFVVSktspIkhDFVVMGLSNVWNECAKEWSDGKLDYKAWSGQSDCITSKTTD----NQWLSMDCSSKRYVVKFQA--</p> <p><b>Proposed:</b> aliSize=109 (resi) RMSD=2.05 (Å)<br/> rgvk-----YFCYSTKCYFYIMNKTITWSGCKANQHYG--VPILKTEDEDELKFLQRHV--I-P-GNYNIGLSYDKKKKEWAIDngpsklDMKI KKM-nfksRGCVFLS-KA-RIEDIDCNIPYCYICGKkLdk<br/> -----gfccplGSSYDEHCYQVFOQMNVEDAEKFTQQRhgSHLVSFHSSEVDFVVSktspIkhDFVVMGLSNVWNECAKEWSDGKLDYKAWSGQSDCITSKtTDnQWLSMDCSSKRYVVKFQA--</p>                                                                                                                        |
| 1015 | <p>1p4ID<br/>(122)</p> <p>liodA<br/>(129)</p> | M | 19.67 | <p><b>TM-align:</b> aliSize=95 (resi) RMSD=2.32 (Å)<br/> rgvk----YFCYSTKCYFYIMNKTITWSGCKANQHYG--VPILKTEDEDELKFLQRHV--IPG---NYWIGLSYDKKKKEwawidngpsklmki kkmf-----K-----SRGCVFLSK-A---RIEDIDCNIPYCYICGKkLdk<br/> ----dcssGSSYEGHCYKVFQKSKTWADAESFTKQVngGHLVSESSGADVVGQLIaqkIKSakiHVVIGLRAQNK-E-----kQCSlEwsdgsIsyehnwieeSKKCLGVHieTgfhKWENFYEQQDPFVCEA----</p> <p><b>SARST:</b> aliSize=105 (resi) RMSD=9.99 (Å)<br/> rgvky-----FCYSTKCYFYIMNKTITWSGCKANQHY--VPIKTEDEDELKFLQRH----VIPGNYNIGLSYDKKKKEWAIDNGPSKL-DM--KIKKMnfksrgcVFLS-KA---RIEDIDCNIPYCYICG-kkLdk<br/> ----dcssGSSYEGHCYKVFQKSKTWADAESFTKQVngGHLVSESSGADVVGQLIaqkIKSakiHVVIGLRAQNKekqSI-EWSDGSSISYENWIEEESKCLG-VHIETGfhKWENFYEQQDPFVCEa----</p> <p><b>BLAST:</b> aliSize=50 (resi) iden=24.59% (30/122) simi=40.98% (50/122)<br/> rgvky-----FCYSTKCYFYIMNKTITWSGCKANQHY--VPILKTEDEDELKFLQRHV--IPG---NYWIGLSYDKKKKEWAIDNGPSKLDMKIKKMNFksRGCVFLSKA--RIEDIDCNIPYCYICG-kkLdk<br/> ----dcssGSSYEGHCYKVFQKSKTWADAESFTKQVngGHLVSESSGADVVGQLIaqkIKSakiHVVIGLRAQNKekqCSIEWSDGSSISYENWIEEESKCLG-VHIETGfhKWENFYEQQDPFVCEa-----</p> <p><b>Proposed:</b> aliSize=109 (resi) RMSD=2.09 (Å)<br/> rgvk----YFCYSTKCYFYIMNKTITWSGCKANQHYG--VPILKTEDEDELKFLQRHV--IPG---NYWIGLSYDKKKKEWAIDngpsklDMKIK-kmfnksRGCVFLS--KA-RIEDIDCNIPYCYICGkLdk<br/> ----dcssGSSYEGHCYKVFQKSKTWADAESFTKQVngGHLVSESSGADVVGQLIaqkIKSakiHVVIGLRAQNKekqCSIEWSDGSSISYENWIEEESKCLG-VHIETGfhKWENFYEQQDPFVCEa----</p>                                                                                              |
| 1016 | <p>1r13A<br/>(145)</p> <p>1oz7B<br/>(123)</p> | M | 17.07 | <p><b>TM-align:</b> aliSize=100 (resi) RMSD=2.74 (Å)<br/> deelqtelyeikhqllqtMgVlslqgSMLSVGDKVFSTNGQSVNFDTIKEMCTRA-G-GNIAVPRTPPENEATAS--IAKKYNNYVYLCMIEDQTPG-Dfhyldgasvsytwnypgeprgq-----GK-EKIVEMYTD-GTWNDRGLOQYRLAVCEF--<br/> -----N---C-LP---DWSVYEGYCYKVFKERMWADA EKFCIKQhKdSHLVSFNSKEVDFVIsIAFPMLKNDLWIGLTDYWRD-cN-----wewsdgaqldykawDNeRHFfIYKNTdNQTRDCTWTFSFVCKCpa</p> <p><b>SARST:</b> aliSize=109 (resi) RMSD=9.27 (Å)<br/> deelqtelyeikhqllqtmgvlsiqgs-----MLSVGDKVFSTNGQSVNFDTIKEMCTRA--GNIAVPRTPPENEATASIAKKY--NNYVYLCMIEDQTPGDFHYLDGASVSYTNNY--PGEPrqgqkckVEMYTDGTWNDRGLOQYRLAV-CE--f<br/> -----nc1pdWSVYEGYCYKVFKERMWADA EKFCIKQhKdSHLVSFNSKEVDFVIsIAFPMLKNDLWIGLTDYWRDcNWEWSGQALDYKANDNeRHF-----IYKNTdNQTRDCTWTFSFVCKCpa--</p> <p><b>BLAST:</b> aliSize=51 (resi) iden=21.95% (27/123) simi=41.46% (51/123)<br/> deelqtelyeikhqllqtmgvlsiqgsmllsvgd-----KVFStngQSVNFDTIKEMCTRA--GNIAVPRTPPENEATASIAKKY--NNYVYLCMIEDQTPGDFHYLDGASVSYTNNY--PGEPrqgqkckVEMYTDGTWNDRGLOQYRLAVCE---f<br/> -----nc1pdwsyegyycyKVFK---ERMWADA EKFCIKQhKdSHLVSFNSKEVDFVIsIAFPMLKNDLWIGLTDYWRDcNWEWSGQALDYKANDNeRHF-----DNeRHFfIYKNTdNQTRDCTWTFSFVCKCpa--</p> <p><b>Proposed:</b> aliSize=114 (resi) RMSD=2.03 (Å)<br/> deelqtelyeikhqllqtM-gVlslqgSMLSVGDKVFSTNGQSVNFDTIKEMCTRA-G-GNIAVPRTPPENEATAS--IAK-KYNNYVYLCMIEDQTPGDFHYLDGASVSYTNNY--PGEPrqgqkckVEMYTD-GTWNDRGLOQYRLAVCEF--<br/> -----N---C1--P---DWSVYEGYCYKVFKERMWADA EKFCIKQhKdSHLVSFNSKEVDFVIsIAFPMLKNDLWIGLTDYWRDcNWEWSGQALDYKANDNeRHF-----DNeRHFfIYKNTdNQTRDCTWTFSFVCKCpa</p> |

|      |                                                                                                           |   |       |                                                                                                                                                                                                                                                                                                                                                                                                                                                                                                                                                                                                                                                                                                                                                                                                                                                                                                                                                                                                                                                                                                                                                                                                                                                                                                                                                                                                                                                                                                                                                                                                                                                                                    |
|------|-----------------------------------------------------------------------------------------------------------|---|-------|------------------------------------------------------------------------------------------------------------------------------------------------------------------------------------------------------------------------------------------------------------------------------------------------------------------------------------------------------------------------------------------------------------------------------------------------------------------------------------------------------------------------------------------------------------------------------------------------------------------------------------------------------------------------------------------------------------------------------------------------------------------------------------------------------------------------------------------------------------------------------------------------------------------------------------------------------------------------------------------------------------------------------------------------------------------------------------------------------------------------------------------------------------------------------------------------------------------------------------------------------------------------------------------------------------------------------------------------------------------------------------------------------------------------------------------------------------------------------------------------------------------------------------------------------------------------------------------------------------------------------------------------------------------------------------|
| 1017 | <p data-bbox="163 226 252 298">1r13A<br/>(145)</p> <p data-bbox="163 550 252 621">lukmB<br/>(124)</p>     | M | 19.35 | <p data-bbox="468 178 2635 262"><b>TM-align:</b> aliSize=98 (resi) RMSD=2.23 (Å)<br/> deeltelyeikhqilqtMgVlslqgSMLVGDkVFSTNGQSVNFDTIKEMCTRAG--GNIAPRTPPENEAIASIAKK-Y-NYVYLCMI-E-DQTPGdfhyldgasvsytnwypgeprgq-----GKEKCVEMYTD--GTWDRGCLQYRLAVCEf--<br/> -----C-P-----GWSFDQHCYKVFEPVKWTEAEELCMQOHkgSRLASIHSSSEAFVSKLASKaLkFTSMWIGLNaPwKDCK-----wewsdnarfdykawKRRPYCTVWVKpdrIFWFTRGCEKSVSFVCKfl t</p> <p data-bbox="468 310 2496 394"><b>SARST:</b> aliSize=109 (resi) RMSD=11.26 (Å)<br/> deeltelyeikhqilqtmgvlsiqg----MLVGDkVFSTNGQSVNFDTIKEMCTRA--GNIAPRTPPENEAIASIAKKYnnyVYLCMIEDQTPG----DFHYLDGASVSTINWYPGEPRGgqgkeKCVEMYTDGTWN-DRGCLQYRLAVCE---f<br/> -----cplgWSFDQHCYKVFEPVKWTEAEELCMQOHkSRLASIHSSSEAFVSKLASKA---LKFTSMWIGLNNpWkdCKWEWSNARFDYKAWKRRPYCT----VMVVKPDRIFWFTRGCEKSVSFVCKfl t-</p> <p data-bbox="468 443 2674 527"><b>BLAST:</b> aliSize=44 (resi) iden=19.35% (24/124) simi=35.48% (44/124)<br/> deeltelyeikhqilqtmgvlsiqgsmvsgdkvfstngqsv-----NFDTIKEMCTRA--GNIAPRTPPENEAIASIAKKYNNY--VYLCMIEDQTPGDFHYLDGASVSTINWypgeprgQKKEKCVEMYTD--GTWDRGCLQYRLAVCEf--<br/> -----cplgwsfdqhcycvfevkWTEAEELCMQOHkSRLASIHSSSEAFVSKLASKALKftSMWIGLNNPWKDKWEWSNARFDYKAW-----KRRPYCTVWVKpDRIFWFTRGCEKSVSFVCKfl t</p> <p data-bbox="468 575 2487 659"><b>Proposed:</b> aliSize=110 (resi) RMSD=1.93 (Å)<br/> deeltelyeikhqilqtM-gvLslqgSMLVGDkVFSTNGQSVNFDTIKEMCTRAG--GNIAPRTPPENEAIASIAKK-Y-NYVYLCMI-----edqtPGDFHYLDGASVSTINWypgeprgqGKEKCVEMYTD--GTWDRGCLQYRLAVCEf--<br/> -----Cp-----GWSFDQHCYKVFEPVKWTEAEELCMQOHkgSRLASIHSSSEAFVSKLASKaLkFTSMWIGLNNpwk---DCKWEWSNARFDYKAWK-----RRPYCTVWVKpdrIFWFTRGCEKSVSFVCKfl t</p>                                                         |
| 1018 | <p data-bbox="163 869 252 940">1r13A<br/>(145)</p> <p data-bbox="163 1192 252 1264">lukmA<br/>(131)</p>   | M | 18.32 | <p data-bbox="468 829 2683 913"><b>TM-align:</b> aliSize=101 (resi) RMSD=2.36 (Å)<br/> deeltelyeikhqilqtMgVlslqgSMLVGDkVFSTNGQSVNFDTIKEMCTRA-G-NIAPRTPPENEAIASIAKKYNN--N-VYVYLCMIEDQ--TPGdfhyldgasvsytnwypgeprg-----GQKEKCVEMYTD--GTWDRGCLQYRLAVCEf--<br/> -----D--C-PS---DWTAYDQHCYLAIEPONWYEAERFCTEQaKdCHLVSISQSRREGNFVAQLVSGFMhrsEiYVWIGLRDRReeqQCN-----pewndgskiiyvnwkeGESKMCQGLTKwtNfhdWNNINCEDLYPFVCKf sa</p> <p data-bbox="468 961 2534 1045"><b>SARST:</b> aliSize=113 (resi) RMSD=10.13 (Å)<br/> deeltelyeikhqilqtmgvlsiq---GSMLVGDkVFSTNGQSVNFDTIKEMCTRA--GNIAPRTPPENEAIASIAKKYNNYVYIGMIEDQTP-----GDFHYLDGASVSTINWYPGEPRGgqgkeKCVEMYTDG---TWDRGCLQYRLAVCE---f<br/> -----dcpSDWTAYDQHCYLAIEPONWYEAERFCTEQaKdCHLVSISQSRREGNFVAQLVSGFMHRSE-IYVWIGLRdRreeqqCNPEWNGSKIIVVWKEGESK-----MCQGLTKWtNfhdWNNINCEDLYPFVCKf sa-</p> <p data-bbox="468 1094 2665 1178"><b>BLAST:</b> aliSize=53 (resi) iden=21.37% (28/131) simi=40.46% (53/131)<br/> deeltelyeikhqilqtmgvlsiqgsmvsgdkvfstn-----QSVNFDTIKEMCTRAG--GNIAPRTPPENEAIASIAKKYNN--N-VYVYLCMIEDQ--TPGDFHYLDGASVSTINWYPGEPRGQKKEKCVEMYTDGTWDRGCLQYRLAVCEf--<br/> -----dcpSDWTAYDQHCYLAIEPONWYEAERFCTEQaKdCHLVSISQSRREGNFVAQLVSGFMhrseiYVWIGLRDRreeqqCNPEWNGSKIIVVWKEGESKMCQGLTKWtNfhdWNNINCEDLYPFVCKf sa</p> <p data-bbox="468 1226 2510 1310"><b>Proposed:</b> aliSize=115 (resi) RMSD=1.86 (Å)<br/> deeltelyeikhqilqtM-gvLslqgSMLVGDkVFSTNGQSVNFDTIKEMCTRA-G-NIAPRTPPENEAIASIAKKYNN--N-VYVYLCMIEDQ--TPGDFHYLDGASVSTINWYPgeprgqGKEKCVEMYTD--GTWDRGCLQYRLAVCEf--<br/> -----D--Cp--S---DWTAYDQHCYLAIEPONWYEAERFCTEQaKdCHLVSISQSRREGNFVAQLVSGFMhrsEiYVWIGLRDRreeqq--QCNPEWNGSKIIVVWKEG-----ESKMCQGLTKwtNfhdWNNINCEDLYPFVCKf sa</p> |
| 1019 | <p data-bbox="163 1520 252 1591">1r13A<br/>(145)</p> <p data-bbox="163 1843 252 1915">luexA<br/>(125)</p> | M | 16.80 | <p data-bbox="468 1480 2599 1564"><b>TM-align:</b> aliSize=102 (resi) RMSD=2.42 (Å)<br/> deeltelyeikhqilqtMgVlslqgSMLVGDkVFSTNGQSVNFDTIKEMCTRAGNIAPRTPPENEAIASIAKKY--N-NYVYLCMIEDQ-T--PGdfhyldgasvsytnwypgepr-----GQKKEKCVEMYTD--GTWDRGCLQYRLAVCEf<br/> -----GCLP-----DWSYKGHYKVFVKVGTWEDA EKFCVENSCHLASIDSKEEADFVTKLASqTLtkFvYDAWIGLRDEskTqgCS-----pqwtgdgssvvyenVDEPTKCFGLDVhtEyRTWTLPGKKNPFICKS</p> <p data-bbox="468 1612 2546 1696"><b>SARST:</b> aliSize=106 (resi) RMSD=11.43 (Å)<br/> deeltelyeikhqilqtmgvlsiqg----SMLVGDkVFSTNGQSVNFDTIKEMCTRAGNIAPRTPPENEAIASIAKKYNN--NYVYLCMIEDQ--TPGDFHYLDGASVSTINW--YPGEPRG--GQKKEKCVEMYTDGTWDR----gclqyrlavcef<br/> -----gclpDWSYKGHYKVFVKVGTWEDA EKFCVENSCHLASIDSKEEADFVTKLASqTLtkFvYDAWIGLRDEskTQ--QCSPOWTDGSSVVENVdePTKCFGLdvHTEYRTWTLPGKKNPFicks-----</p> <p data-bbox="468 1745 2614 1829"><b>BLAST:</b> aliSize=55 (resi) iden=23.20% (29/125) simi=44.00% (55/125)<br/> deeltelyeikhqilqtmgvlsiqgsmvsgd-----KVFSTNGQSVNFDTIKEMCTRAGNIAPRTPPENEAIASIAKKYNNYVY--N-VYVYLCMIEDQTPGDF--HYLDGASVSTINWypgeprgqgkeKCVEMYTD--GTWDRGCLQYRLAVCE-f<br/> -----gclpdwsykgchycvfkvkv---TWEDA EKFCVENSCHLASIDSKEEADFVTKLASqTLTKFvYDAWIGLRDEskTQ--QCSPOWTDGSSVVENVdePTKCFGLDVhtEyRTWTLPGKKNPFICKS-</p> <p data-bbox="468 1877 2457 1961"><b>Proposed:</b> aliSize=113 (resi) RMSD=1.79 (Å)<br/> deeltelyeikhqilqtM-gvLslqgSMLVGDkVFSTNGQSVNFDTIKEMCTRAGNIAPRTPPENEAIASIAKKY--N-NYVYLCMIEDQ--TPGDFHYLDGASVSTINWypgeprgqGKEKCVEMYTD--GTWDRGCLQYRLAVCEf<br/> -----GC1--P-----DWSYKGHYKVFVKVGTWEDA EKFCVENSCHLASIDSKEEADFVTKLASqTLtkFvYDAWIGLRDEskTqg--CSPQWTDGSSVVENVdePTKCFGLDVhtEyRTWTLPGKKNPFICKS</p>                                          |

|      |                                               |   |       |                                                                                                                                                                                                                                                                                                                                                                                                                                                                                                                                                                                                                                                                                                                                                                                                                                                                                                                                                                                                                                                                                                                                                                                                                                                                                                                                                                                                                                                                                                          |
|------|-----------------------------------------------|---|-------|----------------------------------------------------------------------------------------------------------------------------------------------------------------------------------------------------------------------------------------------------------------------------------------------------------------------------------------------------------------------------------------------------------------------------------------------------------------------------------------------------------------------------------------------------------------------------------------------------------------------------------------------------------------------------------------------------------------------------------------------------------------------------------------------------------------------------------------------------------------------------------------------------------------------------------------------------------------------------------------------------------------------------------------------------------------------------------------------------------------------------------------------------------------------------------------------------------------------------------------------------------------------------------------------------------------------------------------------------------------------------------------------------------------------------------------------------------------------------------------------------------|
| 1020 | <p>1r13A<br/>(145)</p> <p>1j34B<br/>(123)</p> | M | 17.07 | <p><b>TM-align:</b> aliSize=101 (resi) RMSD=2.43 (Å)<br/> deeltelyeikhqilqtMgVlslqgSMLVGDGVFSTNGQSVNFDTIKEMCTRA-G-GNIAVPRTPPENEAIASIAKK-Y-NNYVYLCMI-EDQTPGdfhyldgasvsytnwypgeprg-----OGKEKCVEMYT-DGTWDRGCLQYRLAVCEF--<br/> -----D--C-PS---DWSYEGHCYKPFSEPKWADAENFCTQhAgHLSVFSQSEADFFVVKLAfQtFgHSIFWMLShVWnQCNW-----qwsnaamlrykawAEESYCVYFKStNNKRSRACRMAAQFVCFEqa</p> <p><b>SARST:</b> aliSize=109 (resi) RMSD=10.71 (Å)<br/> deeltelyeikhqilqtmgvlsiqg----SMLVGDGVFSTNGQSVNFDTIKEMCTRA--GNIAVPRTPPENEAIASIAKKYNNYVylgMIEDQTPG----DFHYLDGASVSTINWYPGEPRGgqgkckVEMYTDGTWDRGCLQYRLAVCFE---f<br/> -----dcpSDWSYEGHCYKPFSEPKWADAENFCTQhAgHLSVFSQSEADFFVVKLAfQTFGHS---IFWMLSNVWnQCNWQWSNAAMLRKAWAEESYCV-----YFKStNNKRSRACRMAAQFVCFEfq-</p> <p><b>BLAST:</b> aliSize=48 (resi) iden=19.51% (24/123) simi=39.02% (48/123)<br/> deeltelyeikhqilqtmgvlsiqgsmlsvgdvfstngqsv-----NFDTIKEMCTRA--AGGNIAVPRTPPENEAIASIA--KKYNNYVY-LCMIEDQTPGDFHYLDGASVSTINWypGEprgqgkckVEMYT-DGTWDRGCLQYRLAVCFE--<br/> -----dcpSDWSYEGHCYKPFSEPKWADAENFCTQhAgHLSVFSQSEADFFVVKLAfQTFGHSIFWMLSNVWnQCNWQWSNAAMLRKAW--AE-----ESYCVYFKStNNKRSRACRMAAQFVCFEqa</p> <p><b>Proposed:</b> aliSize=114 (resi) RMSD=1.88 (Å)<br/> deeltelyeikhqilqtM-gvLslqgSMLVGDGVFSTNGQSVNFDTIKEMCTRA-G-GNIAVPRTPPENEAIASIAKK-Y-NNYVYLCMI-EDQTPGDFHYLDGASVSTINWYPGEprgqgkckVEMYT-DGTWDRGCLQYRLAVCFE--<br/> -----D---Cp--S---DWSYEGHCYKPFSEPKWADAENFCTQhAgHLSVFSQSEADFFVVKLAfQtFgHSIFWMLShVWnQC-NWQWSNAAMLRKAWAE-----SYCVYFKStNNKRSRACRMAAQFVCFEqa</p>            |
| 1021 | <p>1r13A<br/>(145)</p> <p>1jwiB<br/>(123)</p> | M | 15.45 | <p><b>TM-align:</b> aliSize=100 (resi) RMSD=2.52 (Å)<br/> deeltelyeikhqilqtMgVlslqgSMLVGDGVFSTNGQSVNFDTIKEMCTRAG--GNIAVPRTPPENEAIASIAK--KYNKYVYLCMIED-OTPGdfhyldgasvsytnwypgeprgq-----G-KEKCVEMYTD-GTWDRGCLQYRLAVCFE--<br/> -----G--C-LP---DWSYKGHYKVKFVKEKTWADA EKFKELVngHLSVNSRDEGEFISKLALekMRIVLWIGLSHFWRICPL-----rwdgarldyraISDEPICFVAESFhNKIQWTNRKKSfVCKYrv</p> <p><b>SARST:</b> aliSize=111 (resi) RMSD=9.40 (Å)<br/> deeltelyeikhqilqtmgvlsiqgs----MLVGDGVFSTNGQSVNFDTIKEMCTRA--GNIAVPRTPPENEAIASIAKK-YNN-YVYLCMIEDOTPGDFHYLDGASVSTINWypGEPRGgqgkckVEMYTDGTWDRGCLQYRLAVCFE---f<br/> -----gclpdWSYKGHYKVKFVKEKTWADA EKFKELVngHLSVNSRDEGEFISKLALekMRIVLWIGLSHFWRICPLRWTDGARLDYRALSDPIC-----FVAESFhNKIQWTNRKKSfVCKYrv-</p> <p><b>BLAST:</b> aliSize=32 (resi) iden=16.26% (20/123) simi=26.02% (32/123)<br/> deeltelyeikhqilqtmgvlsiqgsmlsvgd-----SFSNGQSVNfdtIEMCTRAGGNIAVPRTPPENEAIASIA--KYNKYVYLCMIEDOTPGDFHYLDGASVST-----tnwypgeprgqgkckVemytdgtwdrgrc<br/> -----gclpdWSYKGHYKVKFVKEKTWADA EKFKELVngHLSVNSRDEGEFISKLALekMRIVLWIGLSHFWRICPLRWTDGARLDYRALSDPICfvaesfhnkiqwtcnrksfvckyrv-----<br/> lqyrlavcef<br/> -----</p> <p><b>Proposed:</b> aliSize=114 (resi) RMSD=1.85 (Å)<br/> deeltelyeikhqilqtM-gvLslqgSMLVGDGVFSTNGQSVNFDTIKEMCTRAG--GNIAVPRTPPENEAIASIAK--KYNKYVYLCMIEDO-tPGDFHYLDGASVSTINWypGenReagkckVEMYTD-GTWDRGCLQYRLAVCFE--<br/> -----G--C1--P---DWSYKGHYKVKFVKEKTWADA EKFKELVngHLSVNSRDEGEFISKLALekMRIVLWIGLSHFWR-ICPLRWTDGARLDYRALSDP-----P-----ICFVAESFhNKIQWTNRKKSfVCKYrv</p> |
| 1022 | <p>1r13A<br/>(145)</p> <p>1v4IB<br/>(125)</p> | M | 19.20 | <p><b>TM-align:</b> aliSize=102 (resi) RMSD=2.54 (Å)<br/> deeltelyeikhqilqtMgVlslqgSMLVGDGVFSTNGQSVNFDTIKEMCTRA-G-GNIAVPRTPPENEAIASIAK-KYN-NYVYLCMI-E-DQTPGdfhyldgasvsytnwypgeprgq-----GKEKCVEMYT-DGTWDRGCLQYRLAVCFE--<br/> -----G--FC--C-P---GWSYDEHCYQVFOKMWADA EKFKCTQhRgSHLSVFSHSEVDFVVKTSPIlKhDFWMLSNvWNECAK-----ewsdgkldykawsGQSDCITSKItDNQWLSMDCSSKRYVVKFqa</p> <p><b>SARST:</b> aliSize=110 (resi) RMSD=12.54 (Å)<br/> deeltelyeikhqilqtmgvlsiqgsm-----LSVGDGVFSTNGQSVNFDTIKEMCTRA--GNIAVPRTPPENEAIASIAK--KYN-NYVYLCMIEDOTPGDFHYLDGASVSTINWYPGEPRGQGKCKVEMYTDGTWDRGCLQYRL-avcef<br/> -----gfcplgWSYDEHCYQVFOKMWADA EKFKCTQhRgSHLSVFSHSEVDFVVKTSPIlKhDFWMLSNvWNECAKESDGTKLDYKAWsgQSDCITSKITTDNQWLSMDCSSKRYVVKFqa-----</p> <p><b>BLAST:</b> aliSize=46 (resi) iden=19.20% (24/125) simi=36.80% (46/125)<br/> deeltelyeikhqilqtmgvlsiqgsmlsvgdvfstng-----SFSNFDTIKEMCTRA--GNIAVPRTPPENEAIASIAK--KYN-NYVYLCMIEDOTPGDFHYLDGASVSTINWypgeprgQGKCKVEMYTDGTWDRGCLQYRLAVCFE--<br/> -----gfcplgWSYDEHCYQVFOKMWADA EKFKCTQhRgSHLSVFSHSEVDFVVKTSPIlKhDFWMLSNvWNECAKESDGTKLDYKAW-----SGQSDCITSKITTDNQWLSMDCSSKRYVVKFqa</p> <p><b>Proposed:</b> aliSize=113 (resi) RMSD=2.01 (Å)<br/> deeltelyeikhqilqtM-gvLslqgSMLVGDGVFSTNGQSVNFDTIKEMCTRA-G-GNIAVPRTPPENEAIASIAK-KYN-NYVYLCMI-----edqtPGDFHYLDGASVSTINWYPgeprgqgkckVEMYT-DGTWDRGCLQYRLAVCFE--<br/> -----G--FC--Cp--GWSYDEHCYQVFOKMWADA EKFKCTQhRgSHLSVFSHSEVDFVVKTSPIlKhDFWMLSNvwn----ECAKESDGTKLDYKAWSG-----QSDCITSKItDNQWLSMDCSSKRYVVKFqa</p>              |

|      |                                                                   |   |       |                                                                                                                                                                                                                                                                                                                                                                                                                                                                                                                                                                                                                                                                                                                                                                                                                                                                                                                                                                                                                                                                                                                                                                                                                                                                                                                                                                                                                                                                                                                                                                                                                                                                                                                                                                                                                                                                                                                                                                                                                                                                                                                                                                                                                                                                                                                                                                                                                                                                                                                                                    |
|------|-------------------------------------------------------------------|---|-------|----------------------------------------------------------------------------------------------------------------------------------------------------------------------------------------------------------------------------------------------------------------------------------------------------------------------------------------------------------------------------------------------------------------------------------------------------------------------------------------------------------------------------------------------------------------------------------------------------------------------------------------------------------------------------------------------------------------------------------------------------------------------------------------------------------------------------------------------------------------------------------------------------------------------------------------------------------------------------------------------------------------------------------------------------------------------------------------------------------------------------------------------------------------------------------------------------------------------------------------------------------------------------------------------------------------------------------------------------------------------------------------------------------------------------------------------------------------------------------------------------------------------------------------------------------------------------------------------------------------------------------------------------------------------------------------------------------------------------------------------------------------------------------------------------------------------------------------------------------------------------------------------------------------------------------------------------------------------------------------------------------------------------------------------------------------------------------------------------------------------------------------------------------------------------------------------------------------------------------------------------------------------------------------------------------------------------------------------------------------------------------------------------------------------------------------------------------------------------------------------------------------------------------------------------|
| 1023 | <p><b>lr13A</b><br/>(145)</p> <hr/> <p><b>liodA</b><br/>(129)</p> | M | 18.60 | <p><b>TM-align:</b> aliSize=100 (resi) RMSD=2.39 (Å)<br/> deeltelyeikhqilqtmgVLSlqgSMLVGDkVFSTNGQSVNFDTIKEMCTRA-G-<b>GNIAVPRTPE</b>NEA<b>IASIAKK</b>-YNN---<b>YVYLCMIEDQ</b>---TPgdfhyldgasvsytnwypgeprg-----<b>QGKEKCVEMYT</b>--D-GT<b>WDRG</b>LL<b>YRLAV</b>CHF<br/> -----DCSS----GWSYEGHCYKVF<b>KQSKTWADAESFCTKQvNg</b>HLVSI<b>ESSG</b>AD<b>FDV</b>Q<b>LIAQ</b>kIKSakiH<b>WI</b>GLRA<b>QnkeKQCS</b>-----iwsdgsissyenwi<b>EEESK</b>K<b>CLGVH</b>IetGfHK<b>ENFY</b>CE<b>QDPFV</b>CEa</p> <p><b>SARST:</b> aliSize=110 (resi) RMSD=9.27 (Å)<br/> deeltelyeikhqilqtmgVLSlqgs-----MLVGDkVFSTNGQSVNFDTIKEMCTRA--<b>GNIAVPRTPE</b>NEA<b>IASIAKK</b>---YNNY<b>YLCMIEDQ</b>TPGDFHYLDGASVS<b>YTNWYP</b>gepr<b>GQGKEKCVEMY</b>--TD--T<b>WDRG</b>LL<b>YRLAV</b>CE-f<br/> -----dcssgWSYEGHCYKVF<b>KQSKTWADAESFCTKQvNg</b>HLVSI<b>ESSG</b>AD<b>FDV</b>Q<b>LIAQ</b>kIKSakiH<b>WI</b>GLRA<b>QnkeKQCS</b>-<b>IEWSGSSISYENW</b>-----<b>IEESK</b>K<b>CLGVH</b>iETfHk<b>ENFY</b>CE<b>QDPFV</b>CEa-</p> <p><b>BLAST:</b> aliSize=56 (resi) iden=24.81% (32/129) simi=43.41% (56/129)<br/> deeltelyeikhqilqtmgVLSlqgsmlsvgd-----<b>KVFS</b>tn<b>gQSVNFDTIKEMCTRA</b>--<b>GNIAVPRTPE</b>NEA<b>IASIAKK</b>YNN---<b>YVYLCMIEDQ</b>-<b>QTPGDFHYLDGASVS</b><b>YTNWYP</b>gepr<b>gqGKEKCVEMY</b>TD--G--T<b>WDRG</b>LL<b>YRLAV</b>CE-f<br/> -----dcssgwsyeghcy<b>KVFK</b>---<b>QSKTWADAESFCTKQvNg</b>HLVSI<b>ESSG</b>AD<b>FDV</b>Q<b>LIAQ</b>kIKSakiH<b>WI</b>GLRA<b>QnkeKQCS</b><b>IEWSGSSISYENW</b><b>IEE</b>-----<b>SKKCLGVH</b>IetGfHK<b>ENFY</b>CE<b>QDPFV</b>CEa-</p> <p><b>Proposed:</b> aliSize=116 (resi) RMSD=1.94 (Å)<br/> deeltelyeikhqilqtm-gvLslqgSMLVGDkVFSTNGQSVNFDTIKEMCTRA<b>G-<b>GNIAVPRTPE</b>NEA<b>IASIAKK</b>-YNN---<b>YVYLCMIEDQ</b>---</b>TPGDFHYLDGASVS<b>YTNWYP</b>gepr<b>gqGKEKCVEMY</b>T--D-GT<b>WDRG</b>LL<b>YRLAV</b>CEf<br/> -----D--Cs--S---GWSYEGHCYKVF<b>KQSKTWADAESFCTKQvNg</b>HLVSI<b>ESSG</b>AD<b>FDV</b>Q<b>LIAQ</b>kIKSakiH<b>WI</b>GLRA<b>QnkeKQCS</b><b>IEWSGSSISYENW</b><b>IEE</b>-----<b>ESKCLGVH</b>IetGfHK<b>ENFY</b>CE<b>QDPFV</b>CEa</p>                                                                                                                                                                                                                                                                                                                                                                                                                                                                                       |
| 1024 | <p><b>lr13A</b><br/>(145)</p> <hr/> <p><b>lj34A</b><br/>(129)</p> | M | 19.38 | <p><b>TM-align:</b> aliSize=100 (resi) RMSD=2.16 (Å)<br/> deeltelyeikhqilqtmgVLSlqgSMLVGDkVFSTNGQSVNFDTIKEMCTRA-G-<b>GNIAVPRTPE</b>NEA<b>IASIAKK</b>-Y--N<b>YVYLCMIEDQ</b>---TPgdfhyldgasvsytnwypgeprg-----<b>QGKEKCVEMYT</b>--D-GT<b>WDRG</b>LL<b>YRLAV</b>CHF<br/> -----D--C-PS---GWSYEGHCYK<b>PFKLYKTW</b>DAER<b>FCTEQaK</b>gHLVSI<b>ESAG</b>AD<b>FDV</b>Q<b>LVTEN</b>IqntkS<b>YWI</b>GLR<b>VQgkEkQCS</b>-----swwsdgssvsyenwi<b>EAESK</b>T<b>CLGLEK</b>EtGfRK<b>VNIY</b>CG<b>QNPV</b>CEa</p> <p><b>SARST:</b> aliSize=111 (resi) RMSD=9.03 (Å)<br/> deeltelyeikhqilqtmgVLSlqgs-----MLVGDkVFSTNGQSVNFDTIKEMCTRA--<b>GNIAVPRTPE</b>NEA<b>IASIAKKY</b>---NN<b>YVYLCMIEDQ</b>TPGDF--<b>HYLDGASVS</b><b>YTNWYP</b>gepr<b>GQGKEKCVEMY</b>-TDG--T<b>WDRG</b>LL<b>YRLAV</b>CE-f<br/> -----dcpsgWSYEGHCYK<b>PFKLYKTW</b>DAER<b>FCTEQaK</b>gHLVSI<b>ESAG</b>AD<b>FDV</b>Q<b>LVTEN</b>IqntkS<b>YWI</b>GLR<b>VQgkEkQCS</b><b>IEWSGSSVSYENW</b>-----<b>IEESK</b>T<b>CLGLEK</b>EtGfRK<b>VNIY</b>CG<b>QNPV</b>CEa-</p> <p><b>BLAST:</b> aliSize=48 (resi) iden=22.48% (29/129) simi=37.21% (48/129)<br/> deeltelyeikhqilqtmgVLSlqgsmlsvgdvfstngqsvn-----<b>FTTIKEMCTRA</b>--<b>GNIAVPRTPE</b>NEA<b>IASIAKK</b>YNN---<b>YVYLCMIEDQ</b>TPGDF--<b>HYLDGASVS</b><b>YTNWYP</b>gepr<b>gqGKEKCVEMY</b>TDG--T<b>WDRG</b>LL<b>YRLAV</b>CE-f<br/> -----dcpsgwsyeghcykpfklykt<b>WDAERFCTEQaK</b>gHLVSI<b>ESAG</b>AD<b>FDV</b>Q<b>LVTEN</b>IqntkS<b>YWI</b>GLR<b>VQgkEkQCS</b><b>IEWSGSSVSYENW</b><b>IEESK</b>T<b>CLGLEK</b>EtGfRK<b>VNIY</b>CG<b>QNPV</b>CEa-</p> <p><b>Proposed:</b> aliSize=115 (resi) RMSD=1.84 (Å)<br/> deeltelyeikhqilqtm-gvLslqgSMLVGDkVFSTNGQSVNFDTIKEMCTRA<b>G-<b>GNIAVPRTPE</b>NEA<b>IASIAKK</b>-YNN---<b>YVYLCMIEDQ</b>---</b>TPGDFHYLDGASVS<b>YTNWYP</b>gepr<b>gqGKEKCVEMY</b>T--D-GT<b>WDRG</b>LL<b>YRLAV</b>CEf<br/> -----D--Cp--S---GWSYEGHCYK<b>PFKLYKTW</b>DAER<b>FCTEQaK</b>gHLVSI<b>ESAG</b>AD<b>FDV</b>Q<b>LVTEN</b>IqntkS<b>YWI</b>GLR<b>VQgkEkQCS</b><b>IEWSGSSVSYENW</b><b>IEE</b>-----<b>ESKCLGLEK</b>EtGfRK<b>VNIY</b>CG<b>QNPV</b>CEa</p>                                                                                                                                                                                                                                                                                                                                                                                                                                                                                        |
| 1025 | <p><b>ltdqB</b><br/>(126)</p> <hr/> <p><b>loz7B</b><br/>(123)</p> | M | 29.27 | <p><b>TM-align:</b> aliSize=102 (resi) RMSD=2.17 (Å)<br/> eQEEG<b>TKFO</b>HCYRH<b>PDRET</b>VDAERR<b>RE</b>Q-Q-S<b>HS</b>SV<b>TPPE</b>Q<b>EFV</b>NK-NA----<b>QYQW</b>IGL<b>NDRTIEGDF</b>rwsdghslqfek<b>wrpnqpdf</b>-----<b>FATGED</b>C<b>VMIWHER</b>g<b>EW</b>ND<b>VPCNYQLP</b>FT<b>CK</b>KG-<br/> -NCLPD<b>SVYEGY</b>CYK<b>VFKER</b>M<b>NADA</b>E<b>KFTK</b>q<b>hkd</b>g<b>HLV</b>SFR<b>NSKE</b>V<b>DFV</b>IS<b>IA</b>fpm1k<b>N</b>LV<b>WIGL</b>TD<b>YWRDCN</b>-----<b>W</b>ewsdgaqldy<b>ka</b><b>W</b>D<b>NER</b>H<b>CFI</b>Y<b>KNTD</b>N-<b>Q</b>W<b>TRRD</b>CT<b>WTFS</b>V<b>CK</b>C<b>Pa</b></p> <p><b>SARST:</b> aliSize=110 (resi) RMSD=9.62 (Å)<br/> eqc--EEG<b>TKFO</b>HCYRH<b>PDRET</b>VDAERR<b>RE</b>Q--<b>Q</b>S<b>HS</b>SV<b>TPPE</b>Q<b>EFV</b>NK----<b>AQYQW</b>IGL<b>NDRTIEGDF</b>R<b>WSD</b>GH<b>S</b>Q<b>FEK</b>WR--<b>PNQ</b>pdf<b>fatged</b>cv<b>MIWHER</b>g<b>EW</b>ND<b>VPCNYQLP</b>FT<b>CK</b>--g<br/> ---nCLPD<b>SVYEGY</b>CYK<b>VFKER</b>M<b>NADA</b>E<b>KFTK</b>q<b>hkd</b>g<b>HLV</b>SFR<b>NSKE</b>V<b>DFV</b>IS<b>IA</b>fpm1k<b>N</b>LV<b>WIGL</b>TD<b>YWRDCN</b><b>W</b>EW<b>SD</b>GA<b>Q</b>LD<b>YKA</b><b>W</b>D<b>NER</b>H<b>CF</b>-----<b>I</b>Y<b>KNT</b>-<b>D</b>NO<b>W</b>TR<b>RD</b>CT<b>WTFS</b>V<b>CK</b>C<b>Pa</b>-</p> <p><b>BLAST:</b> aliSize=58 (resi) iden=32.52% (40/123) simi=47.15% (58/123)<br/> eq-EEG<b>TKFO</b>HCYRH<b>PDRET</b>VDAERR<b>RE</b>Q<b>S</b>--<b>HS</b>SV<b>TPPE</b>Q<b>EFV</b>NK----<b>QYQW</b>IGL<b>NDRTIEGDF</b>R<b>WSD</b>GH<b>S</b>Q<b>FEK</b>WR--<b>PNQ</b>pdf<b>fatged</b>cv<b>MIWHER</b>g<b>EW</b>ND<b>VPCNYQLP</b>FT<b>CK</b>--kg<br/> ---nCLPD<b>SVYEGY</b>CYK<b>VFKER</b>M<b>NADA</b>E<b>KFTK</b>q<b>hkd</b>g<b>HLV</b>SFR<b>NSKE</b>V<b>DFV</b>IS<b>IA</b>fpm1k<b>N</b>LV<b>WIGL</b>TD<b>YWRDCN</b><b>W</b>EW<b>SD</b>GA<b>Q</b>LD<b>YKA</b><b>W</b><b>D</b>NER<b>HCF</b>I<b>YKNTD</b>-----<b>N</b>O<b>W</b>TR<b>RD</b>CT<b>WTFS</b>V<b>CK</b>C<b>Pa</b>--</p> <p><b>Proposed:</b> aliSize=112 (resi) RMSD=1.36 (Å)<br/> eQEEG<b>TKFO</b>HCYRH<b>PDRET</b>VDAERR<b>RE</b>Q-Q-S<b>HS</b>SV<b>TPPE</b>Q<b>EFV</b>NK-NA----<b>QYQW</b>IGL<b>NDRTIEGDF</b>rwsdghslqfek<b>wrpnqpdf</b><b>fatGED</b>C<b>VMIWHER</b>g<b>EW</b>ND<b>VPCNYQLP</b>FT<b>CK</b>KG-<br/> -NCLPD<b>SVYEGY</b>CYK<b>VFKER</b>M<b>NADA</b>E<b>KFTK</b>q<b>hkd</b>g<b>HLV</b>SFR<b>NSKE</b>V<b>DFV</b>IS<b>IA</b>fpm1k<b>N</b>LV<b>WIGL</b>TD<b>YWRDCN</b><b>W</b>EW<b>SD</b>GA<b>Q</b>LD<b>YKA</b><b>W</b><b>D</b>NER<b>HCF</b>I<b>YKNTD</b>N-<b>Q</b>W<b>TRRD</b>CT<b>WTFS</b>V<b>CK</b>C<b>Pa</b></p> |

|      |                                                             |   |       |                                                                                                                                                                                                                                                                                                                                                                                                                                                                                                                                                                                                                                                                                                                                                                                                                                                                                                                                                                                                                                                                                                                                                                                                                                                                                                                                                                                                                                               |
|------|-------------------------------------------------------------|---|-------|-----------------------------------------------------------------------------------------------------------------------------------------------------------------------------------------------------------------------------------------------------------------------------------------------------------------------------------------------------------------------------------------------------------------------------------------------------------------------------------------------------------------------------------------------------------------------------------------------------------------------------------------------------------------------------------------------------------------------------------------------------------------------------------------------------------------------------------------------------------------------------------------------------------------------------------------------------------------------------------------------------------------------------------------------------------------------------------------------------------------------------------------------------------------------------------------------------------------------------------------------------------------------------------------------------------------------------------------------------------------------------------------------------------------------------------------------|
| 1026 | <p><b>1tdqB</b><br/>(126)</p> <p><b>lukmB</b><br/>(124)</p> | M | 32.26 | <p><b>TM-align:</b> aliSize=101 (resi) RMSD=2.07 (Å)<br/> eq-EEGWTKFGHCYRHPDRETIVDAERRRREQ-Q-SHLSSTVTPPEQEFVNNNAQ-----DYQWIGLNDRTIEGdf rwsdghs lqfekwrpnqpdf-----FATGEDVVMWHERGEWNDVPCNYQLPFTCKKG-<br/> --CPLGWSSFDQHCYKVEPVKNWTEAEEICMQHhKgSRLASIHSSSEEAfVSKLASKALkf tSMWIGLNNPWKDCk-----wewsdnarfdykawKRRP-YCTVMVVKpDRIFWFRGCEKSVSEVCKFLt</p> <p><b>SARST:</b> aliSize=114 (resi) RMSD=9.67 (Å)<br/> eqc-EEGWTKFGHCYRHPDRETIVDAERRRREQ--QSHLSSTVTPPEQEFVNNNAQ-----YQWIGLNDRTIEGDFRWSLGHSLQFEKwrpnqpdNFFATGEDCVVMWHERGEWNDVPCNYQLPFTCKK--g<br/> ---cPLGWSSFDQHCYKVEPVKNWTEAEEICMQHhKgSRLASIHSSSEEAfVSKLASKALkf tSMWIGLNNPWKDCkWEWSDNARFDYK-----AWKRRPYCTVMVVKPDR-IFWFRGCEKSVSEVCKF1t-</p> <p><b>BLAST:</b> aliSize=63 (resi) iden=33.06% (41/124) simi=50.81% (63/124)<br/> eq-EEGWTKFGHCYRHPDRETIVDAERRRREQ--QSHLSSTVTPPEQEFVNNNAQ-----DYQWIGLNDRTIEGDFRWSLGHSLQFEKWRPNQPDFATGEDCVVMWHERGEWNDVPCNYQLPFTCKK---kg<br/> --CPLGWSSFDQHCYKVEPVKNWTEAEEICMQHhKgSRLASIHSSSEEAfVSKLASKALkf tSMWIGLNNPWKDCkWEWSDNARFDYKAWK-RRP---YCT---VMVVKPDRIFWFRGCEKSVSEVCKf1t--</p> <p><b>Proposed:</b> aliSize=111 (resi) RMSD=1.54 (Å)<br/> eq-EEGWTKFGHCYRHPDRETIVDAERRRREQ-Q-SHLSSTVTPPEQEFVNNNAQ-----DYQWIGLND-rtiE--GDFRWSLGHSLQFEKWRPNQPDF-fatGEDCVVMWHERGEWNDVPCNYQLPFTCKKG-<br/> --CPLGWSSFDQHCYKVEPVKNWTEAEEICMQHhKgSRLASIHSSSEEAfVSKLASKALkf tSMWIGLNNp---WkdCKWEWSDNARF-DY-K---AWKRRP-----YCTVMVVKpDRIFWFRGCEKSVSEVCKFLt</p>                        |
| 1027 | <p><b>1tdqB</b><br/>(126)</p> <p><b>lukmA</b><br/>(131)</p> | M | 30.95 | <p><b>TM-align:</b> aliSize=102 (resi) RMSD=1.90 (Å)<br/> eQEEGWTKFGHCYRHPDRETIVDAERRRREQ-Q-SHLSSTVTPPEQEFVNNNAQ-D-----YQWIGLNDRTIIEGDF rwsdghs lqfekwrpnqpdfn-----FFaTgEDVVMWHERG-GEWNDVPCNYQLPFTCKKG-<br/> -DCPSDWTAYDQHCYLAIGEPQNYEAERFCTEQakdGHLVSTQSRREGNFVAQLVSGFmhrseiVWIGLRDRREEQCn-----pewndgskiiyvwnkeGE-S-KMQGLTKWTFHDWNNINCEDLYPFVCKFSa</p> <p><b>SARST:</b> aliSize=115 (resi) RMSD=9.44 (Å)<br/> eqc--EEGWTKFGHCYRHPDRETIVDAERRRREQ--QSHLSSTVTPPEQEFVNNNAQ-----NAQD---YQWIGLNDRTIEGDF--FRWSLGHSLQFEKWRPNQPDFfatGEDCVVMWHERG-EWNDVPCNYQLPFTCKK--g<br/> ---dcPSDWTAYDQHCYLAIGEPQNYEAERFCTEQakdGHLVSTQSRREGNFVAQLVSGFmhrseiVWIGLRDRREEQCnPEWNDGSKIIVVNWKEGES-----KMQGLTKWTFHDWNNINCEDLYPFVCKFSa-</p> <p><b>BLAST:</b> aliSize=61 (resi) iden=33.33% (42/126) simi=48.41% (61/126)<br/> eq-EEGWTKFGHCYRHPDRETIVDAERRRREQ--QSHLSSTVTPPEQEFVNNNAQ-----NAQDYQWIGLNDRTIEGDF--RWSLGHSLQFEKWRPNQPDFFATGEDCVVMWHERGEWNDVPCNYQLPFTCKK---kg<br/> --dcPSDWTAYDQHCYLAIGEPQNYEAERFCTEQakdGHLVSTQSRREGNFVAQLVSGFmhrseiVWIGLRDRREEQCnPEWNDGSKIIVVNWKEGES-----KMQGLTKWTFHDWNNINCEDLYPFVCKFSa--</p> <p><b>Proposed:</b> aliSize=117 (resi) RMSD=1.38 (Å)<br/> eQEEGWTKFGHCYRHPDRETIVDAERRRREQ-Q-SHLSSTVTPPEQEFVNNNAQ-D-----YQWIGLNDRTIIEGDF--RWSLGHSLQFEKWRPNQPDFfatGEDCVVMWHERG-GEWNDVPCNYQLPFTCKKG-<br/> -DCPSDWTAYDQHCYLAIGEPQNYEAERFCTEQakdGHLVSTQSRREGNFVAQLVSGFmhrseiVWIGLRDRREEQCnPEWNDGSKIIVVNWKEGES-----KMQGLTKWTFHDWNNINCEDLYPFVCKFSa</p> |
| 1028 | <p><b>1tdqB</b><br/>(126)</p> <p><b>luexA</b><br/>(125)</p> | M | 35.20 | <p><b>TM-align:</b> aliSize=101 (resi) RMSD=1.91 (Å)<br/> eQEEGWTKFGHCYRHPDRETIVDAERRRREQ-QSHLSSTVTPPEQEFVNNNAQ--D-----YQWIGLNDRTIIEGDF rwsdghs lqfekwrpnqpdfn-----FATGEDVVMWHERG-GEWNDVPCNYQLPFTCKKG-<br/> -GCLPDWSSYKGHCKVFKKVGTVDAEKFCVENSGLASIDSKEEADFTKLASqtLtkfvyDAWIGLRDESKTQCCSPQWTDGSSVYVEN-----VDEPTKCFGLDVTETyRTWTLPCGEKNPHICKS-</p> <p><b>SARST:</b> aliSize=109 (resi) RMSD=8.93 (Å)<br/> eqceeg-----WTKFGHCYRHPDRETIVDAERRRREQ-QSHLSSTVTPPEQEFVNNNAQ-----QDYQWIGLN--DRTIEGDFRWSLGHSLQFEKWRPNQPDFATGEDCVVMWHERG-EWNDVPCNYQLPFTCKK--kg<br/> -----gclpdWSSYKGHCKVFKKVGTVDAEKFCVENSGLASIDSKEEADFTKLASqtLtkfvyDAWIGLRDESKTQCCSPQWTDGSSVYVEN-----VDEPTKCFGLDVTETyRTWTLPCGEKNPHICKS--</p> <p><b>BLAST:</b> aliSize=68 (resi) iden=39.20% (49/125) simi=54.40% (68/125)<br/> eq-EEGWTKFGHCYRHPDRETIVDAERRRREQ-QSHLSSTVTPPEQEFVNNNAQ-----YQWIGLND--RTIEGDFRWSLGHSLQFEKWRPNQPDFATGEDCVVMWHERGEWNDVPCNYQLPFTCKK--kg<br/> --gCLPDWSSYKGHCKVFKKVGTVDAEKFCVENSGLASIDSKEEADFTKLASqtLtkfvyDAWIGLRDESKTQCCSPQWTDGSSVYVEN--VDEPTKCF--GLD---VHTYRTWTLPCGEKNPHICKS--</p> <p><b>Proposed:</b> aliSize=115 (resi) RMSD=1.77 (Å)<br/> eQEEGWTKFGHCYRHPDRETIVDAERRRREQ-QSHLSSTVTPPEQEFVNNNAQ--D-----YQWIGLNDRTIIEGDF--RWSLGHSLQFEKWRPNQPDFATGEDCVVMWHERG-GEWNDVPCNYQLPFTCKKG-<br/> -GCLPDWSSYKGHCKVFKKVGTVDAEKFCVENSGLASIDSKEEADFTKLASqtLtkfvyDAWIGLRDESKTQCCSPQWTDGSSVYVEN--VDEPTKCFGLDVTETyRTWTLPCGEKNPHICKS-</p>                                     |

|      |   |       |                                                                                                                                                                                                                                                                                                                                                                                                                                                                                                                                                                                                                                                                                                                                                                                                                                                                                                                                                                                                                                                                                                                                                                                                                                                                                                                                                                                                                                 |
|------|---|-------|---------------------------------------------------------------------------------------------------------------------------------------------------------------------------------------------------------------------------------------------------------------------------------------------------------------------------------------------------------------------------------------------------------------------------------------------------------------------------------------------------------------------------------------------------------------------------------------------------------------------------------------------------------------------------------------------------------------------------------------------------------------------------------------------------------------------------------------------------------------------------------------------------------------------------------------------------------------------------------------------------------------------------------------------------------------------------------------------------------------------------------------------------------------------------------------------------------------------------------------------------------------------------------------------------------------------------------------------------------------------------------------------------------------------------------|
| 1029 | M | 32.52 | <p><b>TM-align:</b> aliSize=102 (resi) RMSD=2.01 (Å)<br/> eQEEGWTKFQGHCHYRHPDRETWDAERRRREQ-Q-SHLSSTVTPPEQEFVNKNAQ----DYQWIGLNDRTIEGDFrwsdghslqfekwrpnqpdnf-----FATGEDCVMIWHERGENDVPCNYQLPFTCKG-<br/> -GLPDSSSYKGHCHYKVEKVEKTWADAERFKFKLvnGGHLMVNSRREGFEFISKLALekmriVLVWIGLSHFWRICPL-----rwtdgarldyraLSDEPTCFVAESF-HNKWIQWTCNRKKSIVCKYrv</p> <p><b>SARST:</b> aliSize=111 (resi) RMSD=9.24 (Å)<br/> eq-EEGWTKFQGHCHYRHPDRETWDAERRRREQ-Q-SHLSSTVTPPEQEFVNKNAQ----KNAQD-YQWIGL--NDRTIEGDFRWSGHSLOFEKWRPNQPDNFFATGEDCVMIWHERGENDVPCNYQLPFTCK--g<br/> --gCLPDSSSYKGHCHYKVEKVEKTWADAERFKFKLvnGGHLMVNSRREGFEFISKLALekmriVLVWIGLSHFWRICP--LRWTDGARLDYR-----ALSD-----EPTCFVAESF-HNKWIQWTCNRKKSIVCKYrv-</p> <p><b>BLAST:</b> aliSize=63 (resi) iden=34.15% (42/123) simi=51.22% (63/123)<br/> eq-EEGWTKFQGHCHYRHPDRETWDAERRRREQ-Q-SHLSSTVTPPEQEFVNKNAQDYQ-----WIGLNDRTIEGDFRWSGHSLOFEKWRPNQPDNFFATGEDcvvmiWHERgeNDVPCNYQLPFTCK---kg<br/> --gCLPDSSSYKGHCHYKVEKVEKTWADAERFKFKLvnGGHLMVNSRREGFEFISKLALekmriVLVWIGLSHFWRICPLRWTGARLDYR-ALSDEPTCFVAES-----FHNK--WIQWTCNRKKSIVCKYrv--</p> <p><b>Proposed:</b> aliSize=113 (resi) RMSD=1.36 (Å)<br/> eQEEGWTKFQGHCHYRHPDRETWDAERRRREQ-Q-SHLSSTVTPPEQEFVNKNAQ----DYQWIGLNDRTIEGDFRWSGHSLOFEKWRPNQPDNFFATGEDCVMIWHERGENDVPCNYQLPFTCKG-<br/> -GLPDSSSYKGHCHYKVEKVEKTWADAERFKFKLvnGGHLMVNSRREGFEFISKLALekmriVLVWIGLSHFWRICPLRWTGARLDYR-----SDEPTCFVAESF-HNKWIQWTCNRKKSIVCKYrv</p>                   |
| 1030 | M | 28.80 | <p><b>TM-align:</b> aliSize=103 (resi) RMSD=2.16 (Å)<br/> -EQEEGWTKFQGHCHYRHPDRETWDAERRRREQ-Q-SHLSSTVTPPEQEFVNKNAQ----DYQWIGLNDRTIEGDFrwsdghslqfekwrpnqpdnf-----FATGEDCVMIWHERGENDVPCNYQLPFTCKG-<br/> -gFCCPLGSSSYDEHCHYQVQKMNWEDAERFKFKLvnGGHLMVNSRREGFEFISKLALekmriVLVWIGLSHFWRICPL-----kewsdgtklDYKAWSGSDCITSKTT-DNQLSMDSSSKRYVVCKFQa</p> <p><b>SARST:</b> aliSize=112 (resi) RMSD=9.85 (Å)<br/> eqc---EEGWTKFQGHCHYRHPDRETWDAERRRREQ-Q-SHLSSTVTPPEQEFVNKNAQ----DYQWIGLNDRTIEGDFRWSGHSLOFEKWRPNQPDNFFATGEDCVMIWHERGENDVPCNYQLPFTCK--g<br/> ---gfcPLGSSSYDEHCHYQVQKMNWEDAERFKFKLvnGGHLMVNSRREGFEFISKLALekmriVLVWIGLSHFWRICPL-----kewsdgtklDYKAWSGSDCITSKTT-DNQLSMDSSSKRYVVCKFQa-</p> <p><b>BLAST:</b> aliSize=64 (resi) iden=32.00% (40/125) simi=51.20% (64/125)<br/> eq---EEGWTKFQGHCHYRHPDRETWDAERRRREQ-Q-SHLSSTVTPPEQEFVNKNAQ----DYQWIGLNDRTIEGDFRWSGHSLOFEKWRPNQPDNFFATGEDCVMIWHERGENDVPCNYQLPFTCK---kg<br/> --gfcPLGSSSYDEHCHYQVQKMNWEDAERFKFKLvnGGHLMVNSRREGFEFISKLALekmriVLVWIGLSHFWRICPL-----kewsdgtklDYKAWSGSDCITSKTT-DNQLSMDSSSKRYVVCKFQa--</p> <p><b>Proposed:</b> aliSize=114 (resi) RMSD=1.59 (Å)<br/> -EQEEGWTKFQGHCHYRHPDRETWDAERRRREQ-Q-SHLSSTVTPPEQEFVNKNAQ----DYQWIGLNDRTIEGDFRWSGHSLOFEKWRPNQPDNFFATGEDCVMIWHERGENDVPCNYQLPFTCKG-<br/> -gFCCPLGSSSYDEHCHYQVQKMNWEDAERFKFKLvnGGHLMVNSRREGFEFISKLALekmriVLVWIGLSHFWRICPL-----kewsdgtklDYKAWSGSDCITSKTT-DNQLSMDSSSKRYVVCKFQa</p>                             |
| 1031 | M | 31.75 | <p><b>TM-align:</b> aliSize=102 (resi) RMSD=1.97 (Å)<br/> eQEEGWTKFQGHCHYRHPDRETWDAERRRREQ-Q-SHLSSTVTPPEQEFVNKNAQ--D-----YQWIGLNDRTIEGDFrwsdghslqfekwrpnqpdnf-----FAT--GEDCVMIWHER-GEWVNDVPCNYQLPFTCKKg<br/> -DCSSGSSSYEGHCHYKVEKQSKTWADAERFKFKLvnGGHLMVNSRREGFEFISKLALekmriVLVWIGLSHFWRICPL-----iewsdgssisyenWIEEeSKKLLGVHIEGTGFHKWENFYEQDPPVCEA-</p> <p><b>SARST:</b> aliSize=113 (resi) RMSD=9.89 (Å)<br/> eqc--EEGWTKFQGHCHYRHPDRETWDAERRRREQ-Q-SHLSSTVTPPEQEFVNKNAQ-----DYQWIGLNDRTIEGDFRWSGHSLOFEKWRPNQPDNFFATGEDCVMIWHERGENDVPCNYQLPFTCK--kg<br/> ---dcSSGSSSYEGHCHYKVEKQSKTWADAERFKFKLvnGGHLMVNSRREGFEFISKLALekmriVLVWIGLSHFWRICPL-----iewsdgssisyenWIEEeSKKLLGVHIEGTGFHKWENFYEQDPPVCEA--</p> <p><b>BLAST:</b> aliSize=68 (resi) iden=37.30% (47/126) simi=53.97% (68/126)<br/> eq-EEGWTKFQGHCHYRHPDRETWDAERRRREQ-Q-SHLSSTVTPPEQEFVNKNAQ-----KNAQDYQWIGLNDRTIEGDFRWSGHSLOFEKWRPNQPDNFFATGEDCVMIWHERGENDVPCNYQLPFTCK--kg<br/> --dcSSGSSSYEGHCHYKVEKQSKTWADAERFKFKLvnGGHLMVNSRREGFEFISKLALekmriVLVWIGLSHFWRICPL-----iewsdgssisyenWIEEeSKKLLGVHIEGTGFHKWENFYEQDPPVCEA--</p> <p><b>Proposed:</b> aliSize=116 (resi) RMSD=1.43 (Å)<br/> eQEEGWTKFQGHCHYRHPDRETWDAERRRREQ-Q-SHLSSTVTPPEQEFVNKNAQ--D-----YQWIGLNDRTIEGDFRWSGHSLOFEKWRPNQPDNFFATGEDCVMIWHER-GEWVNDVPCNYQLPFTCKKg<br/> -DCSSGSSSYEGHCHYKVEKQSKTWADAERFKFKLvnGGHLMVNSRREGFEFISKLALekmriVLVWIGLSHFWRICPL-----iewsdgssisyenWIEEeSKKLLGVHIEGTGFHKWENFYEQDPPVCEA-</p> |



|      |                                                           |   |       |                                                                                                                                                                                                                                                                                                                                                                                                                                                                                                                                                                                                                                                                                                                                                                                                                                                                                                                                                                                                                                                                                                                                                                                                                                                                                                                                                                                                                                                             |
|------|-----------------------------------------------------------|---|-------|-------------------------------------------------------------------------------------------------------------------------------------------------------------------------------------------------------------------------------------------------------------------------------------------------------------------------------------------------------------------------------------------------------------------------------------------------------------------------------------------------------------------------------------------------------------------------------------------------------------------------------------------------------------------------------------------------------------------------------------------------------------------------------------------------------------------------------------------------------------------------------------------------------------------------------------------------------------------------------------------------------------------------------------------------------------------------------------------------------------------------------------------------------------------------------------------------------------------------------------------------------------------------------------------------------------------------------------------------------------------------------------------------------------------------------------------------------------|
| 1032 | <p><b>1tdqB (126)</b></p> <hr/> <p><b>luosA (133)</b></p> | M | 28.57 | <p><b>TM-align: aliSize=101 (resi) RMSD=1.57 (Å)</b><br/> eQEEGWTKFQGHCHYRHPDRETVDAERRRREQ--SHLSSTVTPEEQEFVKNNAQ-----DYQWIGLNDRTIE--EGdf rwsdghslqfekwrpnqpdnf-----FAT--GEDVVMWHERG-GEWNDVPCNYQLPFTCKG---<br/> -HCPSDWYYDQHCYRIENEMNVEDAEWFKTKQakGHLVSKSAKADFVAWMTqnieesfSHVSLGLRVQNKEKQC-----stkwsgssvsydnLLDlyITKSLKKETGFRKWFVASCIGKIPFVCKFPppqc</p> <p><b>SARST: aliSize=115 (resi) RMSD=9.74 (Å)</b><br/> eqc--EEGWTKFQGHCHYRHPDRETVDAERRRREQ--QSHLSSTVTPEEQEFVKN-----NAQDYQWIGLNDRTIE--GDFRWSGDHSLQFEKWRPNQpdnfFATGEDVVMWHERG-GEWNDVPCNYQLPFTCKG----g<br/> ---hcPSDWYYDQHCYRIENEMNVEDAEWFKTKQakGHLVSKSAKADFVAWMTqnieESFSHVSIGLRVQNKEKQCSTKWSGSSVSYDNLDD-----LYITKSLKKETGFRKWFVASCIGKIPFVCKFPppqc-</p> <p><b>BLAST: aliSize=64 (resi) iden=33.33% (42/126) simi=50.79% (64/126)</b><br/> eq-EEGWTKFQGHCHYRHPDRETVDAERRRREQ--SHLSSTVTPEEQEFV-----NKNAOD---YQWIGLNDRTIEGDF--RWSGDHSLQFEKWRPNQpdnFFATGEDVVMWHERG--GEWNDVPCNYQLPFTCKG----kg<br/> --hcPSDWYYDQHCYRIENEMNVEDAEWFKTKQakGHLVSKSAKADFVAWMTQNIIEESfshVSLGLRVQNKEKQCstKWSGSSVSYD-----NLDD-LYIT--KSLKKETGFRKWFVASCIGKIPFVCKFPppqc--</p> <p><b>Proposed: aliSize=114 (resi) RMSD=1.55 (Å)</b><br/> eQEEGWTKFQGHCHYRHPDRETVDAERRRREQ--SHLSSTVTPEEQEFVKNNAQ-----DYQWIGLND-----rtieGDF--RWSGDHSLQFEKWRPNQpdnFFATGEDVVMWHERG-GEWNDVPCNYQLPFTCKG---<br/> -HCPSDWYYDQHCYRIENEMNVEDAEWFKTKQakGHLVSKSAKADFVAWMTqnieesfSHVSLGLRVQNKEKQC-----QCSTKWSGSSVSYD-N---LLDLY---ITKSLKKETGFRKWFVASCIGKIPFVCKFPppqc</p> |
| 1033 | <p><b>1tdqB (126)</b></p> <hr/> <p><b>lj34A (129)</b></p> | M | 34.92 | <p><b>TM-align: aliSize=102 (resi) RMSD=1.86 (Å)</b><br/> eQEEGWTKFQGHCHYRHPDRETVDAERRRREQ--SHLSSTVTPEEQEFVKNNAQ--D-----YQWIGLNDRTIE--GDFrwsdghslqfekwrpnqpdnf-----FAT--GEDVVMWHERG-GEWNDVPCNYQLPFTCKG<br/> -DCPSGWSSYEGHCYKPKLYKTVDAERFCTEQakGHLVSKESAGADFVAQLVTenIqntksVWIGLRVQKKEKQC-----ssewsdgs svsyenWIEaeSKTLGLEKETGFRKWFVNIYCGQNPVCEA-</p> <p><b>SARST: aliSize=114 (resi) RMSD=9.66 (Å)</b><br/> eqc--EEGWTKFQGHCHYRHPDRETVDAERRRREQ--QSHLSSTVTPEEQEFVKN-----AQDYQWIGLNDRTIEGD--FRWSGDHSLQFEKWRPNQpdnFFATGEDVVMWHERG-GEWNDVPCNYQLPFTCKG--kg<br/> ---dcPSGWSSYEGHCYKPKLYKTVDAERFCTEQakGHLVSKESAGADFVAQLVTenIqntksVWIGLRVQKKEKQCSSEWSGSSVSYENWIEAE--KTGLGLEKETGFRKWFVNIYCGQNPVCEA--</p> <p><b>BLAST: aliSize=68 (resi) iden=38.10% (48/126) simi=53.97% (68/126)</b><br/> eq-EEGWTKFQGHCHYRHPDRETVDAERRRREQ--SHLSSTVTPEEQEFV-----N-KNAQDYQWIGL--NDRTIEGDFRWSGDHSLQFEKWRPNQpdnFFATGEDVVMWHERG--GEWNDVPCNYQLPFTCKG--kg<br/> --dcPSGWSSYEGHCYKPKLYKTVDAERFCTEQakGHLVSKESAGADFVAQLVTenIqntksVWIGLRVQKKEKQCSSEWSGSSVSYENWIEAE--KTGLGLEKETGFRKWFVNIYCGQNPVCEA--</p> <p><b>Proposed: aliSize=117 (resi) RMSD=1.51 (Å)</b><br/> eQEEGWTKFQGHCHYRHPDRETVDAERRRREQ--SHLSSTVTPEEQEFVKNNAQ--D-----YQWIGLNDRTIE--GDFRWSGDHSLQFEKWRPNQpdnFFATGEDVVMWHERG-GEWNDVPCNYQLPFTCKG<br/> -DCPSGWSSYEGHCYKPKLYKTVDAERFCTEQakGHLVSKESAGADFVAQLVTenIqntksVWIGLRVQKKEKQCSSEWSGSSVSYENWIEAE-----SKTLGLEKETGFRKWFVNIYCGQNPVCEA-</p>                                              |
| 1034 | <p><b>3bc7C (128)</b></p> <hr/> <p><b>loz7B (123)</b></p> | M | 26.02 | <p><b>TM-align: aliSize=97 (resi) RMSD=2.09 (Å)</b><br/> ----GKRYFKNFYFSLIPKTYSAEQFCVSR-N-SHLTSVTSESEQEFLYKTAG---GLIYWIGLTKA--GM-EGdwswwddtpfnkvqsrvfwipgepnag-----N-NEHCGNIKAPSLQA--NDAPDKTFLFICKRFYvp<br/> nc1pdwSVYEGYCYKVKFERMNVDAEKFCQKqhdGHLVFRNSKEVDFVLSLAFpM1kNDLVWIGLTDYWRDCN-----ewsdgaqldykawDnERHCFIYKNTD--QWTRRDQTWTFSEVCKCPA--</p> <p><b>SARST: aliSize=106 (resi) RMSD=9.76 (Å)</b><br/> gw-----KYFKNFYFSLIPKTYSAEQFCVSR--RNSHLTSVTSESEQEFLYKTAG---GLIYWIGLTKA--KAGMEgdwSWVDTPFNkvqsrvfwipGEPNAGnnehcgnIKAPSLQA--NDAPDKTFLFICKRFYvp<br/> --nc1pdwSVYEGYCYKVKFERMNVDAEKFCQKqhdGHLVFRNSKEVDFVLSLAFpM1kNDLVWIGLTDYWRDCN--WESDGAQL-----DYKAWDNERH-----CFIYKNTDnQWTRRDQTWTFSEVCKCPA--</p> <p><b>BLAST: aliSize=51 (resi) iden=29.27% (36/123) simi=41.46% (51/123)</b><br/> g-----KYFKNFYFSLIPKTYSAEQFCVSR--RNSHLTSVTSESEQEFLYKTAGGLI-----YWIGLTKAGMEGDWSVDTPFNkvqsVRFwipgepnagNNEHCGNIKAPSLQA--NDAPDKTFLFICKRFYvp<br/> -nc1pdwSVYEGYCYKVKFERMNVDAEKFCQKqhdGHLVFRNSKEVDFVLSLAFpM1kNDLVWIGLTDYWRDCN--WESDGAQL-----YKAW-----DNERHCFIYKNTDnQWTRRDQTWTFSEVCKCPA--</p> <p><b>Proposed: aliSize=109 (resi) RMSD=1.75 (Å)</b><br/> ----GKRYFKNFYFSLIPKTYSAEQFCVSR-N-SHLTSVTSESEQEFLYKTAG---GLIYWIGLTKA--gmeGDWSVVDTPFNKVQSVRFwipGepnagnNEHCGNIKAPSLQA--NDAPDKTFLFICKRFYvp<br/> nc1pdwSVYEGYCYKVKFERMNVDAEKFCQKqhdGHLVFRNSKEVDFVLSLAFpM1kNDLVWIGLTDYWRDCN--CNWESDGAQLDY-K-A-D-N-----ERHCFIYKNTDnQWTRRDQTWTFSEVCKCPA--</p>                                 |

|      |                                       |   |       |                                                                                                                                                                                                                                                                                                                                                                                                                                                                                                                                                                                                                                                                                                                                                                                                                                                                                                                                                                                                                                                                                                                                                                                                                                                                                                                                                                                                                                                                                                                                                                 |
|------|---------------------------------------|---|-------|-----------------------------------------------------------------------------------------------------------------------------------------------------------------------------------------------------------------------------------------------------------------------------------------------------------------------------------------------------------------------------------------------------------------------------------------------------------------------------------------------------------------------------------------------------------------------------------------------------------------------------------------------------------------------------------------------------------------------------------------------------------------------------------------------------------------------------------------------------------------------------------------------------------------------------------------------------------------------------------------------------------------------------------------------------------------------------------------------------------------------------------------------------------------------------------------------------------------------------------------------------------------------------------------------------------------------------------------------------------------------------------------------------------------------------------------------------------------------------------------------------------------------------------------------------------------|
| 1035 | <p>3bc7C (128)</p> <p>lukmB (124)</p> | M | 25.81 | <p><b>TM-align:</b> aliSize=98 (resi) RMSD=2.06 (Å)<br/>       ---GKYFKGNFYFSLIPKTIWYSAEQFCVSR--N-SHLT SVTSESEQEFLYKTAG----GLIYWIGLTK-AGMEGdswvddtpfnkvqsrvfwipgepna-----GNNEHCNIGKAP--SLqA NDAPCDKTFLLICKRPYvp<br/>       cplGSSSDOHCYKVFEPVKNWTEAEIEMQOHkgSRLASIHSEEEAVSKLASkaIkFTSMWIGLNNPWKDKCK-----wewsdnarfdykwKRRPYCTVMVVKpDRi-FWfTRGCEKSVSVCKFLT--</p> <p><b>SARST:</b> aliSize=108 (resi) RMSD=9.28 (Å)<br/>       g-----KYFKGNFYFSLIPKTIWYSAEQFCVSR--N-SHLT SVTSESEQEFLYKTAG----GLIYWIGLTKAGMEG-D-WSVVDTPfnkvqsrvfwipgePNNAGNNEHCNIGKAPSLQAW---NDAPCDKTFLLICKRP-yvp<br/>       -cplgSSSDOHCYKVFEPVKNWTEAEIEMQOHkgSRLASIHSEEEAVSKLASkaIkFTSMWIGL--NNPWKDKCKWESNAR-----FDYKAWKRRPYCTVMVVKPDRi fwfTRGCEKSVSVCKFLT---</p> <p><b>BLAST:</b> aliSize=55 (resi) iden=29.03% (36/124) simi=44.35% (55/124)<br/>       ---GKYFKGNFYFSLIPKTIWYSAEQFCVSR--N-SHLT SVTSESEQEFLYKTAGGLI-----YWIWIGLTKAGMEGDWSVVDTPfnkvqsVRFwiPGEpnnagnneHCNIGKAPSLQAWNDAPCDKTFLLICK---rpyvp<br/>       cplGSSSDOHCYKVFEPVKNWTEAEIEMQOHkgSRLASIHSEEEAVSKLASkaIkFTSMWIGLNNPWKDKCKWESNARFD-----YKAW--KRRP-----YCTVMVVKPDRIFWfTRGCEKSVSVCKflT-----</p> <p><b>Proposed:</b> aliSize=110 (resi) RMSD=1.60 (Å)<br/>       ---GKYFKGNFYFSLIPKTIWYSAEQFCVSR--N-SHLT SVTSESEQEFLYKTAG----GLIYWIGLTK--agmEGDWSVVDTPfnKvqSVrfWipgePnNagNNEHCNIGKAP--SLqA NDAPCDKTFLLICKRPYvp<br/>       cplGSSSDOHCYKVFEPVKNWTEAEIEMQOHkgSRLASIHSEEEAVSKLASkaIkFTSMWIGLNNpwk--DCKWESNAR--D--YK--A----WK--RRPYCTVMVVKpDRi-FWfTRGCEKSVSVCKFLT--</p>                                                               |
| 1036 | <p>3bc7C (128)</p> <p>lukmA (131)</p> | M | 22.66 | <p><b>TM-align:</b> aliSize=99 (resi) RMSD=2.15 (Å)<br/>       ---GKYFKGNFYFSLIPKTIWYSAEQFCVSR--RN-SHLT SVTSESEQEFLYKTAG--G--L-IYWIGLTKAG-M-EGDdswvddtpfnkvqsrvfwipgepna-----AGnNEHCNIGK--APSLqA NDAPCDKTFLLICKRPYvp<br/>       dcpsdITAYDOHCYLAIGEPQNWYEAERFCTEQAKdGHLVSIQSRREGNFVAQLVSGfMhrsEiYVWIGLRRReEqQCN-----pewndgskiiyvnwkeGE-SKMQGLTkwTNFH-DWNNINCEDLYPFVCKFSA--</p> <p><b>SARST:</b> aliSize=111 (resi) RMSD=9.56 (Å)<br/>       g-----KYFKGNFYFSLIPKTIWYSAEQFCVSR--N-SHLT SVTSESEQEFLYKTAG-----GLIYWIGLTKAGMEG--DWSVVDTPfnkvqSVRFwiPGEpnnagnnEHCNIGKAPSLQA----NDAPCDKTFLLICKRP-yvp<br/>       -dcpsdITAYDOHCYLAIGEPQNWYEAERFCTEQAKdGHLVSIQSRREGNFVAQLVSGfMhrsEiYVWIGLRRRREEQqCNPEWNGSKI----IYVNWKEGES-----KMQG---LTKWtnfhDNNINCEDLYPFVCKFSA---</p> <p><b>BLAST:</b> aliSize=51 (resi) iden=24.22% (31/128) simi=39.84% (51/128)<br/>       g-----KYFKGNFYFSLIPKTIWYSAEQFCVSR--SRNSHLT SVTSESEQEFLYKTAGGLIYWIGLTKAGMEGDWSVVDTPfnkvqSVRFwiPGEpna-----P-----EP-----N-NAGNNEHCNIGKAPSLQAWNDAPCDKTFLLICK---rpyvp<br/>       -dcpsdITAYDOHCYLAIGEPQNWYEAERFCTEQAKdGHLVSIQSRREGNFVAQLVSGfMHR-----SEIYVWIGLrdreeqqcnPewndSKiiyvnwkeGESKMQGLTWTNFHDWNNINCEDLYPFVCKfSa-----</p> <p><b>Proposed:</b> aliSize=114 (resi) RMSD=1.89 (Å)<br/>       ---GKYFKGNFYFSLIPKTIWYSAEQFCVSR--N-SHLT SVTSESEQEFLYKTAG--G-L---IYWIGLTKAG--mEGDWSVVDTPfnKvqSVrfWipgePnNagNNEHCNIGK--APSLqA NDAPCDKTFLLICKRPYvp<br/>       dcpsdITAYDOHCYLAIGEPQNWYEAERFCTEQAKdGHLVSIQSRREGNFVAQLVSGfMhrseIYVWIGLRRReeq-QCNPEWNGSKI-I--YV--N---WKE-G-ESKMQGLTkwTNFH-DWNNINCEDLYPFVCKFSA--</p> |
| 1037 | <p>3bc7C (128)</p> <p>lj34B (123)</p> | M | 24.39 | <p><b>TM-align:</b> aliSize=98 (resi) RMSD=1.91 (Å)<br/>       ---GKYFKGNFYFSLIPKTIWYSAEQFCVSR--N-SHLT SVTSESEQEFLYKTAG----GLIYWIGLTKA-GMEGDswvddtpfnkvqsrvfwipgepna-----GNNEHCNIGKAPSLqA NDAPCDKTFLLICKRPYvp<br/>       dcpsdSSYEHCYKPFSEPKNWADAENFCTQQAghGHLVSIQSRREGNFVAQLVSGfMhrsEiYVWIGLRRReeq-QCNPEWNGSKI-I--YV--N---WKE-G-ESKMQGLTkwTNFH-DWNNINCEDLYPFVCKFSA--</p> <p><b>SARST:</b> aliSize=109 (resi) RMSD=8.73 (Å)<br/>       gw-----KYFKGNFYFSLIPKTIWYSAEQFCVSR--N-SHLT SVTSESEQEFLYKTAG----GLIYWIGLTKAGMEGDWSVVDTPfnkvqsrvfwipgePNNAGNNEHCNIGKAPSLQAW---NDAPCDKTFLLICKRP-yvp<br/>       --dcpsdwSSYEHCYKPFSEPKNWADAENFCTQQAghGHLVSIQSRREGNFVAQLVSGfMhrsEiYVWIGLRRReeq-QCNPEWNGSKI-I--YV--N---WKE-G-ESKMQGLTkwTNFH-DWNNINCEDLYPFVCKFSA---</p> <p><b>BLAST:</b> aliSize=54 (resi) iden=27.64% (34/123) simi=43.90% (54/123)<br/>       g-----KYFKGNFYFSLIPKTIWYSAEQFCVSR--N-SHLT SVTSESEQEFLYKTAG----GLIYWIGLTKAGMEGDWSVVDTPfnkvqsVRFwiPGEpnaGNNEHCNIGKAPSLQAWNDAPCDKTFLLICK---rpyvp<br/>       -dcpsdSSYEHCYKPFSEPKNWADAENFCTQQAghGHLVSIQSRREGNFVAQLVSGfMhrsEiYVWIGLRRReeq-QCNPEWNGSKI-I--YV--N---WKE-G-ESKMQGLTkwTNFH-DWNNINCEDLYPFVCKFSA---</p> <p><b>Proposed:</b> aliSize=111 (resi) RMSD=1.72 (Å)<br/>       ---GKYFKGNFYFSLIPKTIWYSAEQFCVSR--N-SHLT SVTSESEQEFLYKTAG----GLIYWIGLTKA--gmEGDWSVVDTPfnKvqSVrfWipgePnNagNNEHCNIGKAPSLqA NDAPCDKTFLLICKRPYvp<br/>       dcpsdSSYEHCYKPFSEPKNWADAENFCTQQAghGHLVSIQSRREGNFVAQLVSGfMhrsEiYVWIGLRRReeq-QCNPEWNGSKI-I--YV--N---WKE-G-ESKMQGLTkwTNFH-DWNNINCEDLYPFVCKFSA--</p>                             |

|      |                                       |   |       |                                                                                                                                                                                                                                                                                                                                                                                                                                                                                                                                                                                                                                                                                                                                                                                                                                                                                                                                                                                                                                                                                                                                                                                                                                                                                                                                                                                                                                                                             |
|------|---------------------------------------|---|-------|-----------------------------------------------------------------------------------------------------------------------------------------------------------------------------------------------------------------------------------------------------------------------------------------------------------------------------------------------------------------------------------------------------------------------------------------------------------------------------------------------------------------------------------------------------------------------------------------------------------------------------------------------------------------------------------------------------------------------------------------------------------------------------------------------------------------------------------------------------------------------------------------------------------------------------------------------------------------------------------------------------------------------------------------------------------------------------------------------------------------------------------------------------------------------------------------------------------------------------------------------------------------------------------------------------------------------------------------------------------------------------------------------------------------------------------------------------------------------------|
| 1038 | <p>3bc7C (128)</p> <p>ljwiB (123)</p> | M | 27.64 | <p><b>TM-align:</b> aliSize=99 (resi) RMSD=2.26 (Å)<br/> -----GWKYFKGNFYFSLIPKTYSAEQFCVSRN--SHLTSVTSSESEQEFLYKTAG---GLIYWIGLTKA-GMEGDswvddtpfnkvqsrvfwiqgepna-----GN-NEHCNIGKAPSLqAANDAPCDKTFLLICKRPyvp<br/> gclpdWSSYKGHCKVFKVEKTWADAEKFCkELVngGHLMSVNSREEGEFISLALekmrIVLWVIGLSHFWRICPL-----rwtdgarldyralsdEPICFVAESFHN-KWIQWTCNRKKSfVCKYRV--</p> <p><b>SARST:</b> aliSize=90 (resi) RMSD=11.12 (Å)<br/> g-----WKYFKGNFYFSLIPKTYSAEQFCVSR-----RnshltsVTseseqeflyktaggliYWIGLTKAGMEGDWSVVDTPFNkvqsrvfwiqgepNnagnehcGNIGKAPSLQAW-NDAPCDKTFLLICKRP-yvp<br/> -gclpdWSSYKGHCKVFKVEKTWADAEKFCkELVngghlmsvnsreegefisklalekMR-----IVL-----VWIGLSHFWRICPLRVTIGARLD-----YRALSDPE-----ICFVAFESFHNKIOWTCNRKKSfVCKYRV---</p> <p><b>BLAST:</b> aliSize=36 (resi) iden=21.95% (27/123) simi=29.27% (36/123)<br/> g-----WKYFKGNFYFSLIPKTYSAEQFCVSR--VSRNSHLTSVTSSESEQEFLYKTAG---GGLIYWIGLTKAGMEGDWSVVD-----dtpfnkvqsrvfwiqgepnnagnehcgnikapslqawndapcdktflfickrpyvp<br/> -gclpdWSSYKGHCKVFKVEKTWADAEKFCkELVngghlmsvnsreegefisklalekMRIVLWVIGLSHFWRICPLRVTIGARLDyralsdEPICFVAESFHNKIOWTCNRKKSfVCKYRV-----</p> <p><b>Proposed:</b> aliSize=111 (resi) RMSD=1.80 (Å)<br/> -----GWKYFKGNFYFSLIPKTYSAEQFCVSRN--SHLTSVTSSESEQEFLYKTAG---GLIYWIGLTKA--gmEGDWSVVDTPFNkvqSVrfwiqgepNnagnehcGNIGKAPSLqAANDAPCDKTFLLICKRPyvp<br/> gclpdWSSYKGHCKVFKVEKTWADAEKFCkELVngGHLMSVNSREEGEFISLALekmrIVLWVIGLSHFWRICPLRVTIGARLDY--R---ALSD--EPICFVAESFHN-KWIOWTCNRKKSfVCKYRV--</p>                             |
| 1039 | <p>3bc7C (128)</p> <p>lv4IB (125)</p> | M | 22.40 | <p><b>TM-align:</b> aliSize=98 (resi) RMSD=2.16 (Å)<br/> -----GWKYFKGNFYFSLIPKTYSAEQFCVSRN--SHLTSVTSSESEQEFLYKTAG---GLIYWIGLTKAGMEGDswvddtpfnkvqsrvfwiqgepna-----GNNEHCNIGKAPSLqAANDAPCDKTFLLICKRPyvp<br/> gfccplGWSSYDEHCKQVFQQKMNWEDAERFCTQQRgSHLVSFHSSEVDFVVSktSPILKHDFVWGLSNVWNECA-----kewsdgtklDYKAWSGQSDCITSKITDN-QWLSMDCSSKRYVVCkFQA--</p> <p><b>SARST:</b> aliSize=110 (resi) RMSD=9.79 (Å)<br/> g-----WKYFKGNFYFSLIPKTYSAEQFCVSR--NSHLTSVTSSESEQEFLYKTAG---KTAGGLIYWIGLTKAGMEGDWSVVDTPFNkvqsrvfwiqgepNnagnehcGNIGKAPSLQAW-NDAPCDKTFLLICKRP-yvp<br/> -gfccplGWSSYDEHCKQVFQQKMNWEDAERFCTQQRgSHLVSFHSSEVDFVVSktSPILKHDFVWGLSNVWNECAKENSIGT-----KLDYKAWSGQSDCITSKITDN-QWLSMDCSSKRYVVCkFQA---</p> <p><b>BLAST:</b> aliSize=42 (resi) iden=21.60% (27/125) simi=33.60% (42/125)<br/> -----GWKYFKGNFYFSLIPKTYSAEQFCVSR--NSHLTSVTSSESEQEFLYKTAG---GLIYWIGLTKAGMEGDWSVVDtpfnkvqsrvfwiqgepNnagnehcGNIGKAPSLQAW-NDAPCDKTFLLICKRPyvp<br/> gfccplGWSSYDEHCKQVFQQKMNWEDAERFCTQQRgSHLVSFHSSEVDFVVSktSPILKHDFVWGLSNVWNECAKENSIGT-----LSNV--W-----NECAKEWSDGTIL-DYKAWSGQSDCITSKITDN-QWLSMDCSSKRYVVCkFQA-----</p> <p><b>Proposed:</b> aliSize=109 (resi) RMSD=1.62 (Å)<br/> -----GWKYFKGNFYFSLIPKTYSAEQFCVSRN--SHLTSVTSSESEQEFLYKTAG---GLIYWIGLTKA---kagMEGDWSVVDTPFNkvqSVrfwiqgepNnagnehcGNIGKAPSLqAANDAPCDKTFLLICKRPyvp<br/> gfccplGWSSYDEHCKQVFQQKMNWEDAERFCTQQRgSHLVSFHSSEVDFVVSktSPILKHDFVWGLSNVWNECAKENSIGT-----YK--A---WSG---QSDCITSKITDN-QWLSMDCSSKRYVVCkFQA--</p>           |
| 1040 | <p>3bc7C (128)</p> <p>liodA (129)</p> | M | 22.66 | <p><b>TM-align:</b> aliSize=97 (resi) RMSD=2.10 (Å)<br/> -----GWKYFKGNFYFSLIPKTYSAEQFCVSRN--SHLTSVTSSESEQEFLYKTAG---GL---IYWIGLTKAG-M-EGDswvddtpfnkvqsrvfwiqgepna-----GNNEHCNIGK--APSLqAANDAPCDKTFLLICKRpyvp<br/> dcssGWSSYDEHCKVFKQSKTWADAESEFCTKQVngGHLVSIIESGEADVQQLIAqkiKSakiHVVIGLRAQNKKEQCS-----iewsdgssisyenwieEESKCLGVHieTGFH-KWENFYEQQDPVCEA----</p> <p><b>SARST:</b> aliSize=110 (resi) RMSD=8.96 (Å)<br/> g-----WKYFKGNFYFSLIPKTYSAEQFCVSR--NSHLTSVTSSESEQEFLYKTAG---GGLIYWIGLTKAGMEGDWSVVDTPFNkvqsVRFWIPGEPNNA-GNNEHCNIGKAPSLQAW-NDAPCDKTFLLICKRpyvp<br/> -dcssGWSSYDEHCKVFKQSKTWADAESEFCTKQVngGHLVSIIESGEADVQQLIAqkiKSakiHVVIGLRAQNKKEQCSIEW-----SDGSSISYENWIEEESKCLGVHieTGFH-KWENFYEQQDPVCEA-----</p> <p><b>BLAST:</b> aliSize=54 (resi) iden=28.12% (36/128) simi=42.19% (54/128)<br/> -----GWKYFKGNFYFSLIPKTYSAEQFCVSR--NSHLTSVTSSESEQEFLYKTAG---YKTAGGLIYWIGLTKAGMEGDWSVVDTPFNkvqsVRFWIPGEPNnagnehcGNIGKAPSLQAW-NDAPCDKTFLLICKRpyvp<br/> dcssGWSSYDEHCKVFKQSKTWADAESEFCTKQVngGHLVSIIESGEADVQQLIAqkiKSakiHVVIGLRAQNKKEQCSIEWSDGSSISYENWIEE-----SKKCLGVHIEGFKWENFYEQQDPVCEA-----</p> <p><b>Proposed:</b> aliSize=112 (resi) RMSD=1.85 (Å)<br/> -----GWKYFKGNFYFSLIPKTYSAEQFCVSRN--SHLTSVTSSESEQEFLYKTAG---GL---IYWIGLTKAGMEGDW---SVVDTPFNkvqSVrfwiqgepNnagnehcGNIGK--APSLqAANDAPCDKTFLLICKRpyvp<br/> dcssGWSSYDEHCKVFKQSKTWADAESEFCTKQVngGHLVSIIESGEADVQQLIAqkiKSakiHVVIGLRAQNKKEQCSIEWSDGSSISYENWIEE---YE--N---WIE--EESKCLGVHieTGFH-KWENFYEQQDPVCEA----</p> |

|      |                                       |   |       |                                                                                                                                                                                                                                                                                                                                                                                                                                                                                                                                                                                                                                                                                                                                                                                                                                                                                                                                                                                                                                                                                                                                                                                                                                                                                                                                                                                                                                                                                                                                                                                                                                                                                                                                                                                                                                                                                              |
|------|---------------------------------------|---|-------|----------------------------------------------------------------------------------------------------------------------------------------------------------------------------------------------------------------------------------------------------------------------------------------------------------------------------------------------------------------------------------------------------------------------------------------------------------------------------------------------------------------------------------------------------------------------------------------------------------------------------------------------------------------------------------------------------------------------------------------------------------------------------------------------------------------------------------------------------------------------------------------------------------------------------------------------------------------------------------------------------------------------------------------------------------------------------------------------------------------------------------------------------------------------------------------------------------------------------------------------------------------------------------------------------------------------------------------------------------------------------------------------------------------------------------------------------------------------------------------------------------------------------------------------------------------------------------------------------------------------------------------------------------------------------------------------------------------------------------------------------------------------------------------------------------------------------------------------------------------------------------------------|
| 1041 | <p>3bc7C (128)</p> <p>luosA (133)</p> | M | 20.31 | <p><b>TM-align:</b> aliSize=102 (resi) RMSD=2.19 (Å)<br/> -----GKLYFKGNFYFSLIPKTYSAEQFCVSRN--SHLTSVTESEQEFLYKTAG--G----LIYWI<del>GLTKAGME-GDWS</del>wddt pfnkvqsrvfwipgepnn-----AGNNEHC<del>GNIK</del>--APSLqA<del>NDAPDKTFLIICKR</del>FYVP<br/> hcpsd<del>YYIDQHCYRIFNEEMNVEDAEWFC</del>TKQak<del>AHLVSIKSAKEAD</del>FVAWMTqnIeesfSHVS<del>IGLRVONKEKQC</del>-----stkwsgsvsydnI<del>LDLYITKCSLL</del>keTGFR-K<del>VFV</del>ASIGKIPFVCK<del>FP</del>PQC</p> <p><b>SARST:</b> aliSize=110 (resi) RMSD=9.30 (Å)<br/> g-----KLYFKGNFYFSLIPKTYSAEQFCVSR--RNSHLTSVTESEQEFLYKTAGLI-----YWI<del>GLTKAGMEGDWS</del>WDDtpfnkvqsrvfwipgepnnAGNNEHC<del>GNIK</del>-----KAPsIqawNDAPDKTFLIICKR<del>FYVP</del>-p<br/> -hcpsd<del>YYIDQHCYRIFNEEMNVEDAEWFC</del>TKqa<del>KGAHLVSIKSAKEAD</del>FVAWMTQNIeesfshVS<del>IGLRVONKEKQCSTK</del>SDG-----SSVSYDNL<del>LDLYITKCSLL</del>kkeTgfrKW----FV<del>AS</del>IGKIPFVCK<del>FP</del>PQC-</p> <p><b>BLAST:</b> aliSize=52 (resi) iden=26.56% (34/128) simi=40.62% (52/128)<br/> g-----KLYFKGNFYFSLIPKTYSAEQFCV--SRNSHLTSVTESEQEFLYKtagglIYWI<del>GLTKAGMEGDWS</del>WDD--TPFNK-VQSVRFWIPGE<del>pnnAGNNEHC</del>GNIKAPS-LQAN<del>DAPDKTFLIICKR</del>----yvp<br/> -hcpsd<del>YYIDQHCYRIFNEEMNVEDAEWFC</del>tkq<del>KGAHLVSIKSAKEAD</del>-----VAW-VTQ-NIEESFSH<del>SIgLRVONKEKQCSTK</del>SDSSVSYDNI<del>LDLYITKCSLL</del>keTgfrKW<del>VFV</del>ASIGKIPFVCK<del>FP</del>pqc---</p> <p><b>Proposed:</b> aliSize=113 (resi) RMSD=1.77 (Å)<br/> -----GKLYFKGNFYFSLIPKTYSAEQFCVSRN--SHLTSVTESEQEFLYKTAG-----gLIYWI<del>GLTKAGMEGDWS</del>wddtPF----NKVqSVr<del>fwipgepnnAGNNEHC</del>GNIK--APSLqA<del>NDAPDKTFLIICKR</del>FYVP<br/> hcpsd<del>YYIDQHCYRIFNEEMNVEDAEWFC</del>TKQak<del>AHLVSIKSAKEAD</del>FVAWMTqnIeesf-SHVS<del>IGLRVONK-EKQC</del>S----TKwsgsvsydnI<del>LDLYITKCSLL</del>keTGFR-K<del>VFV</del>ASIGKIPFVCK<del>FP</del>PQC</p>                         |
| 1042 | <p>3bc7C (128)</p> <p>lj34A (129)</p> | M | 21.88 | <p><b>TM-align:</b> aliSize=97 (resi) RMSD=2.07 (Å)<br/> -----GKLYFKGNFYFSLIPKTYSAEQFCVSR-N-SHLTSVTESEQEFLYKTAG----G-LIYWI<del>GLTKAG-M-EGDWS</del>wddt pfnkvqsrvfwipgepnn-----AGNNEHC<del>GNIK</del>--APSLqA<del>NDAPDKTFLIICKR</del>pyvp<br/> dcps<del>WSSYEHCYKPFKLYKTWDDAERFCTEQ</del>ak<del>GHLVSIESAGEAD</del>FVAQLVTeniqnTkSYVW<del>IGLRVQGEKQC</del>-----sewsgsvsyenw<del>EAESKTGLGLE</del>keTGFR-K<del>VNV</del>IYGGQNP<del>FVCEA</del>----</p> <p><b>SARST:</b> aliSize=109 (resi) RMSD=9.17 (Å)<br/> gw-----KYFKGNFYFSLIPKTYSAEQFCVSR--NSHLTSVTESEQEFLYKTA-----GGLIYWI<del>GLTKAGMEGDWS</del>WDDTPfnkvqsVRFWIPGE<del>pnnAGNNEHC</del>GNIKap<del>SLOA</del>----NDAPDKTFLIICK-<del>rpyvp</del><br/> --dcpsgw<del>SSYEHCYKPFKLYKTWDDAERFCTEQ</del>ak<del>GHLVSIESAGEAD</del>FVAQLVTeniqnTKSYVW<del>IGLRVQGEKQC</del>SEW-----SDGSSVSYENW<del>EAESKTGLGLE</del>---EKETgfrk<del>VNV</del>IYGGQNP<del>FVCEA</del>----</p> <p><b>BLAST:</b> aliSize=59 (resi) iden=32.03% (41/128) simi=46.09% (59/128)<br/> -----GKLYFKGNFYFSLIPKTYSAEQFCV--SRNSHLTSVTESEQEFLYKTAGGLI-----YWI<del>GLTKAGMEGDWS</del>WDDTPfnkvqsVRFWIPGE<del>pnnAGNNEHC</del>GNIKAPS-LQAN<del>DAPDKTFLIICKR</del>----rpyvp<br/> dcps<del>WSSYEHCYKPFKLYKTWDDAERFCTEQ</del>ak<del>GHLVSIESAGEAD</del>FVAQLVTENIqnTksyVW<del>IGLRVQGEKQC</del>seWSDGSSV----SYENW<del>EAESKTGLGLE</del>---EKETgfrk<del>VNV</del>IYGGQNP<del>FVCEA</del>----</p> <p><b>Proposed:</b> aliSize=110 (resi) RMSD=1.79 (Å)<br/> -----GKLYFKGNFYFSLIPKTYSAEQFCVSR-N-SHLTSVTESEQEFLYKTAG----G-LIYWI<del>GLTKAGMEGDWS</del>wddtPF----NKVqSVr<del>fwipgepnnAGNNEHC</del>GNIK--APSLqA<del>NDAPDKTFLIICKR</del>pyvp<br/> dcps<del>WSSYEHCYKPFKLYKTWDDAERFCTEQ</del>ak<del>GHLVSIESAGEAD</del>FVAQLVTeniqnTkSYVW<del>IGLRVQGEKQC</del>-----SEwsgsvsyenw<del>EAESKTGLGLE</del>keTGFR-K<del>VNV</del>IYGGQNP<del>FVCEA</del>----</p>                        |
| 1043 | <p>lbyfA (123)</p> <p>loz7B (123)</p> | M | 21.14 | <p><b>TM-align:</b> aliSize=95 (resi) RMSD=2.70 (Å)<br/> -----DYEILFSDITMNYADAGTYQSRG--MALVLSaMRDSTMKAILAF-TE-VK<del>GHDYVWADNLODGAYN</del>fIwndgvsIptdsdlwspnep<del>snpq</del>-----SWQ--L<del>CVQIWSKY</del>LLDDVGC<del>GGARRV</del>ICEKELd<br/> ncIpdwsveye<del>G</del>CYKVKERINWADA<del>EKF</del>TKQhkdGHLVLS--FRNSKE<del>DFV</del>ISLaFPmLN<del>DLVWIGLTDYWRD</del>CNW-----ewsdgaqIdyaW<del>DNerHCF</del>IYKNTD<del>QWTRRD</del>TWTF<del>SVCKCPA</del>-</p> <p><b>SARST:</b> aliSize=109 (resi) RMSD=9.05 (Å)<br/> d-----YEILFSDITMNYADAGTYQSR--GMA<del>LVSaMRDSTMKAILAF</del>TEV<del>VKGHDYVWADNLODGAYN</del>fIwndgvsIptdsdlwspnep<del>SNPQSWQ</del>CVQIWSKYLLDDVGC<del>GGARRV</del>ICEKE-ld<br/> -ncIpdwsveye<del>G</del>CYKVKERINWADA<del>EKF</del>TKQhkdGHLVLSFRNSKE<del>DFV</del>ISLaFPmLN<del>DLVWIGLTDYWRD</del>CNW--E<del>WSDGAQ</del>-----DYKAW<del>DNerHCF</del>IYKNTD<del>QWTRRD</del>TWTF<del>SVCKCPA</del>--</p> <p><b>BLAST:</b> aliSize=45 (resi) iden=26.83% (33/123) simi=36.59% (45/123)<br/> d-----YEILFSDITMNYADAGTYQ--SRGMA<del>LVSaMRDSTMKAILAF</del>TEV<del>VKGHDYVWADNLODGAYN</del>fIwndgvsIptdsdlwspnep<del>SNPQSWQ</del>CVQIWSKYLLDDVGC<del>GGARRV</del>ICEKELd<br/> -ncIpdwsveye<del>G</del>CYKVKERINWADA<del>EKF</del>TKQhkdGHLVLSFRNSKE<del>DFV</del>ISLaFPmLN<del>DLVWIGLTDYWRD</del>CNW--E<del>WSDGAQ</del>-----DYKAW<del>DNerHCF</del>IYKNTD<del>QWTRRD</del>TWTF<del>SVCKCPA</del>-----</p> <p><b>Proposed:</b> aliSize=105 (resi) RMSD=1.81 (Å)<br/> -----DYEILFSDITMNYADAGTYQSR-G-MALVLSaMRDSTMKAILAF-TeV--K<del>GHDYVWADNLODGAYN</del>fIwndgvsIptdsdlwspnep<del>SNPQSWQ</del>CVQIWSKYLLDDVGC<del>GGARRV</del>ICEKELd<br/> ncIpdwsveye<del>G</del>CYKVKERINWADA<del>EKF</del>TKQhkdGHLVLS--FRNSKE<del>DFV</del>ISLaFPmLN<del>DLVWIGLTDYWRD</del>CNW--E<del>WSDGAQ</del>-----DYKAW<del>DNerHCF</del>IYKNTD<del>QWTRRD</del>TWTF<del>SVCKCPA</del>-</p> |

|      |             |   |       |                                                                                                                                                                                                                                                                                                                                                                                                                                                                                                                                                                                                                                                                                                                                                                                                                                                                                                                                                                                                                                                                                                                                                                                                                                                                                                                                                                                                                                                                                                       |
|------|-------------|---|-------|-------------------------------------------------------------------------------------------------------------------------------------------------------------------------------------------------------------------------------------------------------------------------------------------------------------------------------------------------------------------------------------------------------------------------------------------------------------------------------------------------------------------------------------------------------------------------------------------------------------------------------------------------------------------------------------------------------------------------------------------------------------------------------------------------------------------------------------------------------------------------------------------------------------------------------------------------------------------------------------------------------------------------------------------------------------------------------------------------------------------------------------------------------------------------------------------------------------------------------------------------------------------------------------------------------------------------------------------------------------------------------------------------------------------------------------------------------------------------------------------------------|
| 1044 | lbyfA (123) | M | 12.20 | <p><b>TM-align:</b> aliSize=96 (resi) RMSD=2.74 (Å)<br/> -----DYEILFSDETMNYADAGTYCQSRG--MALVLSsaMRDSTMVKAILAFTEV-K-GHDYVVGADNLDQGAynflwndgvs lptdsdlwspnep<del>sn</del>-----PQSWQLVQIWSK--YNLLDDVGGGARRVICEKELd<br/> cplgws sfdqHCYKVFEPVKWTEAEEIEMQOHkgSRLAS--IHSSEEEAFVSKLASKaLkFTSMWICLNPNPKDCK-----wewsdnarfdykaWKRPHYITVMVVVpdRIFWFTRGCEKSVSFVCKFLT-</p> <p><b>SARST:</b> aliSize=108 (resi) RMSD=9.94 (Å)<br/> d-----YEILFSDETMNYADAGTYCQSR--GMAVLSsaMRDSTMVKAILAFTEVKGHDYVVGADNLDQGAynflwndgvs lptdsdlwspnep<del>SNPQS</del>WQLCVQIWSKYNLLDDVGGGARRVICEKE-ld<br/> -cplgws sfdqHCYKVFEPVKWTEAEEIEMQOHkgSRLAS--IHSSEEEAFVSKLASKaLkFTSMWICLNPNPKDCKWESDNARF-----DYKA--WKRPHYITVMVVVpdRIFWFTRGCEKSVSFVCKFLT--</p> <p><b>BLAST:</b> aliSize=33 (resi) iden=15.45% (19/123) simi=26.83% (33/123)<br/> d-----YEILfsDETMYADAGTYC--SRGMALVLSsaMRDSTMVKAILAFTEVKGHDYVVGADNLDQGAynflwndgvs lptdsdlwspnep<del>sn</del>-----wqlcvqiwsdynllddvgggarrvickeld<br/> -cplgws sfdqHCYKVF--EPVKWTEAEEIEMQOHkgSRLAS--IHSSEEEAFVSKLASKaLkFTSMWICLNPNPKDCKWESDNARF--DYKA--WKRPHYITVMVVVpdRIFWFTRGCEKSVSFVCKFLT-----</p> <p><b>Proposed:</b> aliSize=105 (resi) RMSD=1.96 (Å)<br/> -----DYEILFSDETMNYADAGTYCQSR-G-MALVLSsaMRDSTMVKAILAFTEV-K-GHDYVVGADNLDQGAynflwndgvs lptdsdlwspnep<del>SNpq</del>SWQLVQIWSKY--NLLDDVGGGARRVICEKELd<br/> cplgws sfdqHCYKVFEPVKWTEAEEIEMQOHkgSRLAS--IHSSEEEAFVSKLASKaLkFTSMWICLNPNPKDCKWESDNARF--DYKA--WKRPHYITVMVVVpdRIFWFTRGCEKSVSFVCKFLT-</p>                                       |
| 1045 | lbyfA (123) | M | 16.26 | <p><b>TM-align:</b> aliSize=94 (resi) RMSD=2.20 (Å)<br/> -----DYEILFSDETMNYADAGTYCQSRG--MALVLSsaMRDSTMVKAILAFTEVKGHDYVVGADNLDQGAynflwndgvs lptdsdlwspnep<del>sn</del>-----SWQLVQIWSKY-N-LLDDVGGGARRVICEKELd<br/> dcpsdwt aydqHCYLAIGEPQNWYEERFCTEQaKdGHLVLS--IQSREEGNFVAQLVSGFMhrSEiYVWICLRDRREEQCQN-----pewndgskiiyvnwkegESKMCQGLTKWTnFhDWNININEDLYPFVCKFSA-</p> <p><b>SARST:</b> aliSize=110 (resi) RMSD=9.08 (Å)<br/> d-----YEILFSDETMNYADAGTYCQSR--GMAVLSsaMRDSTMVKAILAFTEVKGHDYVVGADNLDQGAynflwndgvs lptdsdlwspnep<del>SNpq</del>SWQLVQIWSKY--NLLDDVGGGARRVICEKE-ld<br/> -dcpsdwt aydqHCYLAIGEPQNWYEERFCTEQaKdGHLVLS--IQSREEGNFVAQLVSGFMhrSEiYVWICLRDRREEQCQNPEWNDGSKI--IYVNWKEG-----ESKMCQGLTKWTnFhDWNININEDLYPFVCKFSA--</p> <p><b>BLAST:</b> aliSize=49 (resi) iden=20.33% (25/123) simi=39.84% (49/123)<br/> dyeilfsd-----TMNYADAGTYC--SRGMALVLSsaMRDSTMVKAILAFTEVKGHDYVVGADNLDQGAynflwndgvs lptdsdlwspnep<del>SNPQS</del>WQLCVQIWSKYNLLDDVGGGARRVICE---keld<br/> -----dcpsdwt aydqhcylaiGEPQNWYEERFCTEQaKdGHLVLS--IQSREEGNFVAQLVSGFMhrSEiYVWICLRDRREEQCQNPEWNDGSKI--IYVNWKEG-----LTKWTnFhDWNININEDLYPFVCKFSA----</p> <p><b>Proposed:</b> aliSize=110 (resi) RMSD=1.88 (Å)<br/> -----DYEILFSDETMNYADAGTYCQSR-G-MALVLSsaMRDSTMVKAILAFTEVKGHDYVVGADNLDQGAynflwndgvs lptdsdlwspnep<del>SNpq</del>SWQLVQIWSKY-N-LLDDVGGGARRVICEKELd<br/> dcpsdwt aydqHCYLAIGEPQNWYEERFCTEQaKdGHLVLS--IQSREEGNFVAQLVSGFMhrSEiYVWICLRDRREEQCQNPEWNDGSKI--IYVNWKEG-----SKMCQGLTKWTnFhDWNININEDLYPFVCKFSA-</p>        |
| 1046 | lbyfA (123) | M | 14.63 | <p><b>TM-align:</b> aliSize=94 (resi) RMSD=2.22 (Å)<br/> -----D-YEILFSDETMNYADAGTYCQSRGMAVLSsaMRDSTMVKAILAFTEV-K--G-HDYVVGADNLDQGA--AYNflwndgvs lptdsdlwspnep<del>sn</del>-----Pq-SWQLVQIWSKY-N-LLDDVGGGARRVICEKELd<br/> gclpdwssykgHCYKVFVKVGTWEDAEEKFVENSghLAS--IDSKEEADFVTKLASQltkFvYDAWICLRDESKTqCSP-----qwt dgs svvyenV-dEPTKCFGLDVHTeYrTWTDLPCGEKNPFICKS----</p> <p><b>SARST:</b> aliSize=104 (resi) RMSD=8.32 (Å)<br/> d-----YEILFSDETMNYADAGTYCQSRGMAVLS--SsamrDSTMVKAILAFTEVKGHDYVVGADNLDQGA--AYNflwndgvs lptdsdlwspnep<del>SNPQS</del>WQLCVQIWSKYN--LLDDVGGGARRVICE--keld<br/> -gclpdwssykgHCYKVFVKVGTWEDAEEKFVENSghLASiD---SKEEADFVTKLASQltkFvYDAWICLRDESKTqCSPQWTDGSSV-----VYE-----NDEPTKCFGLDVHTeYrTWTDLPCGEKNPFICKS----</p> <p><b>BLAST:</b> aliSize=52 (resi) iden=21.95% (27/123) simi=42.28% (52/123)<br/> dyeilfsdetm-----YADAGTYC--QSRG--MALVLSsaMRDSTMVKAILAFTEVKGHDYVVGADNLDQGAynflwndgvs lptdsdlwspnep<del>SNpq</del>SWQLCVQIWSKYNLLDDVGGGARRVICE--keld<br/> -----gclpdwssykgHCYKVFVKVGTWEDAEEKFVENSghLASiD---SKEEADFVTKLASQltkFvYDAWICLRDESKTqCSPQWTDGSSVYEN-----VDEPT--KCFGLDVHTeYrTWTDLPCGEKNPFICKS----</p> <p><b>Proposed:</b> aliSize=108 (resi) RMSD=1.95 (Å)<br/> -----D-YEILFSDETMNYADAGTYCQSRGMAVLSsaMRDSTMVKAILAFTEV-K--G-HDYVVGADNLDQGA--AYNflwndgvs lptdsdlwspnep<del>SNpq</del>SWQLCVQIWSKY-N-LLDDVGGGARRVICEKELd<br/> gclpdwssykgHCYKVFVKVGTWEDAEEKFVENSghLAS--IDSKEEADFVTKLASQltkFvYDAWICLRDESKTqCSPQWTDGSSV--V--Y--NDEPT--KCFGLDVHTeYrTWTDLPCGEKNPFICKS----</p> |
|      | luexA (125) |   |       |                                                                                                                                                                                                                                                                                                                                                                                                                                                                                                                                                                                                                                                                                                                                                                                                                                                                                                                                                                                                                                                                                                                                                                                                                                                                                                                                                                                                                                                                                                       |

|      |                                             |   |       |                                                                                                                                                                                                                                                                                                                                                                                                                                                                                                                                                                                                                                                                                                                                                                                                                                                                                                                                                                                                                                                                                                                                                                                                                                                                                                                                                                                                                                |
|------|---------------------------------------------|---|-------|--------------------------------------------------------------------------------------------------------------------------------------------------------------------------------------------------------------------------------------------------------------------------------------------------------------------------------------------------------------------------------------------------------------------------------------------------------------------------------------------------------------------------------------------------------------------------------------------------------------------------------------------------------------------------------------------------------------------------------------------------------------------------------------------------------------------------------------------------------------------------------------------------------------------------------------------------------------------------------------------------------------------------------------------------------------------------------------------------------------------------------------------------------------------------------------------------------------------------------------------------------------------------------------------------------------------------------------------------------------------------------------------------------------------------------|
| 1047 | <p>lbyfA (123)</p> <hr/> <p>lj34B (123)</p> | M | 18.70 | <p><b>TM-align:</b> aliSize=95 (resi) RMSD=2.58 (Å)<br/> -----DYEILFSDEIMNYADAGTYQSR-G-MALVLSsaMRDSTMVKAIIAFTEV--KGHDYVVGADNLDQGAYnflwndgvs lptdsdlwspnepsn-----Pq-SWQLVQIWSKYLLDDVGGGARRVICEKELd<br/> dcpsdwsyegHCYKPFSEPKNWADAENFCTQOhAgGHLVLS--FOSSEEDFVVKLAFQtfGHSIFWMLSNVWVWOCN-----wqwsnaamlrykaW-aEESYCYFKSTNKWRSRACRMMAQFVCFQA-</p> <p><b>SARST:</b> aliSize=104 (resi) RMSD=8.38 (Å)<br/> d-----YEILFSDEIMNYADAGTYQSR--GMAVLSsaMRDSTMVKAIIAFTEVKGHDY--VVGADNLDQGAYNFLVNDGVSIPtdsdlwspnePSNPqSW---QLCVQIWSKYLLDDVGGGARRVICEKE-ld<br/> -dcpsdwsyegHCYKPFSEPKNWADAENFCTQOhAgGHLVLS--FOSSEEDFVVKLAFQTFGHSifWMLSNVWVWOCN--NWQNSNAAM-----LRYK-AWaceSYCYFKSTNKWRSRACRMMAQFVCFQA--</p> <p><b>BLAST:</b> aliSize=54 (resi) iden=29.27% (36/123) simi=43.90% (54/123)<br/> dyeil-----FSDIMNYADAGTYQSR--SRGMAVLS--SAMRDSSTMVKAIIAFTEVKGHDY--VVGADNLDQGAYNFLVNDGVSIPtdsdlwspnepsnpQSWqlCVQIWSKYLLDDVGGGARRVICE---keld<br/> -----dcpsdwsyeghcykpfsepknwadaenfctqhagghlvsfgsseeadfvvk--LAF-QTFGHSifWMLSNVWVWOCN--NWQNSNAAMRYKA--WAE-----ESY--CVYFKSTNKWRSRACRMMAQFVCFfqa----</p> <p><b>Proposed:</b> aliSize=107 (resi) RMSD=2.10 (Å)<br/> -----DYEILFSDEIMNYADAGTYQSR-G-MALVLSsaMRDSTMVKAIIAFTEV--KGHDYVVGADNLDQGAY--NFLVNDGVSIPtdSdlwspnePSNPqSWQLCVQIWSKY--LLDDVGGGARRVICEKELd<br/> dcpsdwsyegHCYKPFSEPKNWADAENFCTQOhAgGHLVLS--FOSSEEDFVVKLAFQtfGHSIFWMLSNV--WVWOCN--NWQNSNAAMR--Y--K--AWAE--ESYCYFKS--TnkWRSRACRMMAQFVCFQA-</p> |
| 1048 | <p>lbyfA (123)</p> <hr/> <p>ljwiB (123)</p> | M | 15.45 | <p><b>TM-align:</b> aliSize=95 (resi) RMSD=2.44 (Å)<br/> -----DYEILFSDEIMNYADAGTYQSRG--MALVLSsaMRDSTMVKAIIAFTEV--KGHDYVVGADNLDQGAYnflwndgvs lptdsdlwspnep snp-----QS-WQLVQIWSKYLLDDVGGGARRVICEKELd<br/> gclpdwssykGHCVKVFVEKTWADA EKFKELVngGHLMS--VNSREEGEFISKLALekmRIVLVWIGLSHFWRICPL-----rwtDgarldyralSdEPICFVAESFHNKWIQWTNRKKSfVCKYRV-</p> <p><b>SARST:</b> aliSize=106 (resi) RMSD=9.03 (Å)<br/> d-----YEILFSDEIMNYADAGTYQSR--GMAVLSsaMRDSTMVKAIIAFTEV--GH-DYVVG-ADNLDQGAYNFLVNDGVSIPtdsdlwspnePSNPqswQLCVQIWSKYLLDDVGGGARRVICEKE-ld<br/> -gclpdwssykGHCVKVFVEKTWADA EKFKELVngGHLMS--VNSREEGEFISKLALekmRIVLVWIGLSHFWRIC--PLRWTdGARLD-----YRALSDepiCFVAESFHNKWIQWTNRKKSfVCKYRV--</p> <p><b>BLAST:</b> aliSize=33 (resi) iden=14.63% (18/123) simi=26.83% (33/123)<br/> d-----YEILFSDEIMNYADAGTYQSR--RMAVLSsaMRDSTMVKAIIAFTEVKGHDYVVGADNLDQGAYNFLVNDGVSIPtdsdlwspnep snpqsWQLCVQIWSKYLLDDVGGGARRVICEKELd<br/> -gclpdwssyghcKVFVEKTI--WADA EKFKELVngGHLMS--VNSREEGEFISKLALekmRIVLVWIGLSHFWRICPLRWTdGARLDyral sdepicfvaesfhnkwiqwtcnrksfvckyrv-----</p> <p><b>Proposed:</b> aliSize=106 (resi) RMSD=1.95 (Å)<br/> -----DYEILFSDEIMNYADAGTYQSRG--MALVLSsaMRDSTMVKAIIAFTEV--KGHDYVVGADNLDQGAY--NFLVNDGVSIPtdSdlwspnePSNPqSWQLCVQIWS--KYNLLDDVGGGARRVICEKELd<br/> gclpdwssykGHCVKVFVEKTWADA EKFKELVngGHLMS--VNSREEGEFISKLALekmRIVLVWIGLSHF--WRicPLRWTdGARLD--Y--R--ALSD--EPICFVAESFHNKWIQWTNRKKSfVCKYRV-</p>                      |
| 1049 | <p>lbyfA (123)</p> <hr/> <p>lv4IB (125)</p> | M | 17.07 | <p><b>TM-align:</b> aliSize=95 (resi) RMSD=2.71 (Å)<br/> -----DYEILFSDEIMNYADAGTYQSR-G-MALVLSsaMRDSTMVKAIIAFTEV--KGHDYVVGADNLDQGAYnflwndgvs lptdsdlwspnepsn-----QSWQLVQIWSKYLLDDVGGGARRVICEKELd<br/> gfccplgwsydeHCYQVFQOKMWEAEKFCtQhRgSHLVS--FHSSEEDFVVKLAFQtfGHSIFWMLSNVWVWOCN-----ewsdgtklDykawSGQSDITSKTTDQWLSMDSSKRYVCKFQA-</p> <p><b>SARST:</b> aliSize=104 (resi) RMSD=9.09 (Å)<br/> d-----YEILFSDEIMNYADAGTYQSR--GMAVLS--SAmrdsTMVKAIIAFTEVKGHDYVVGADNLDQGAYNFLVNDGVSIPtdsdlwspnepsnpQSWQLVQIWSKYLLDDVGGGARRVICEKE-ld<br/> -gfccplgwsydeHCYQVFQOKMWEAEKFCtQhRgSHLVSfhsSE--EVDVFSKTSPLKhdFVWMLSNVWNEC-AKESDGTklDyKAW-----SGQSDITSKTTDQWLSMDSSKRYVCKFQA--</p> <p><b>BLAST:</b> aliSize=52 (resi) iden=26.83% (33/123) simi=42.28% (52/123)<br/> d-----YEILFSDEIMNYADAGTYQSR--SRGMAVLSsaMRDSTMVKAIIAFTEVKGHDYVVGADNLDQGAYNFLVNDGVSIPtdSDLWSPNEPSNPqswqlCVQIWSKYLLDDVGGGARRVICE---keld<br/> -gfccplgwsydehcQVF--QOKMWEAEKFCtQhRgSHLVS--FHSSEEDFVVKLAFQtfGHSIFWMLSNVWNECAKE--SDGTklDyKAWSGQSD-----CITSKTTDQWLSMDSSKRYVCKFqa----</p> <p><b>Proposed:</b> aliSize=108 (resi) RMSD=2.46 (Å)<br/> -----DYEILFSDEIMNYADAGTYQSRG--MALVLSsaMRDSTMVKAIIAFTEV--KGHDYVVGADNLDQGAYnflwndgvs lPTDSDLWSPNEPSNPQSWQLVQIWS--KYNLLDDVGGGARRVICEKELd<br/> gfccplgwsydeHCYQVFQOKMWEAEKFCtQhRgSHLVS--FHSSEEDFVVKLAFQtfGHSIFWMLSNV--WNEC-----AKESDGTklDyKAWSGQSDITSKTTDQWLSMDSSKRYVCKFQA-</p>                                                   |

|      |                                                                   |   |       |                                                                                                                                                                                                                                                                                                                                                                                                                                                                                                                                                                                                                                                                                                                                                                                                                                                                                                                                                                                                                                                                                                                                                                                                                                                                                                                                                                                                                                                                                                            |
|------|-------------------------------------------------------------------|---|-------|------------------------------------------------------------------------------------------------------------------------------------------------------------------------------------------------------------------------------------------------------------------------------------------------------------------------------------------------------------------------------------------------------------------------------------------------------------------------------------------------------------------------------------------------------------------------------------------------------------------------------------------------------------------------------------------------------------------------------------------------------------------------------------------------------------------------------------------------------------------------------------------------------------------------------------------------------------------------------------------------------------------------------------------------------------------------------------------------------------------------------------------------------------------------------------------------------------------------------------------------------------------------------------------------------------------------------------------------------------------------------------------------------------------------------------------------------------------------------------------------------------|
| 1050 | <p><b>lbyfA</b><br/>(123)</p> <hr/> <p><b>liodA</b><br/>(129)</p> | M | 16.26 | <p><b>TM-align:</b> aliSize=94 (resi) RMSD=2.54 (Å)<br/> -----D-YEILFSDETMNYADAGTYQQR-G-MALVLSsaMRDSTMVKAII LAFTEV-KGH--DYVVGADNLDG-AYNflwndgvs lptdsdlwspnepns-----Pq-SWQLCVQIWSKY-N-LLDDVGGGARRVICeKeld<br/> dcssgwsyEgHCYKVFQSKTWADAESFCTKQvNgGHLVLS--IESSGEADFGQLIAQkIKSakiHVVIGLRAQNKKEKQCS-----IewsdgssisyenwiE-eESKKCLGVHIEtgFhKWENFYEQQDPFVChA---</p> <p><b>SARST:</b> aliSize=107 (resi) RMSD=8.97 (Å)<br/> d-----YEILFSDETMNYADAGTYQQR--GMAVLSsaMRDSTMVKAII LAFTEV---GHDYVVGADNLDGAYN-FLVNDGVSLptdsdlwspnepSNP-QSWQLCVQIWSKYN--LLDDVGGGARRVICe-keld<br/> -dcssgwsyegHCYKVFQSKTWADAESFCTKQvNgGHLVLS--IESSGEADFGQLIAQkIKSakiHVVIGLRAQNKKEKQCSIEVSDGSSI-----SYE----NWIeEESKKCLGVHIEtgFhKWENFYEQQDPFVChA----</p> <p><b>BLAST:</b> aliSize=56 (resi) iden=25.20% (31/123) simi=45.53% (56/123)<br/> d-----YEILFSDETMNYADAGTYQQR--SRMAVLS-SAMRDSTMVKAII LAFTEV---GHDYVVGADNLDGAYN-FLVNDGVSLPTDSdlwspNEPSNPqswQLCVQIWSKYNLLDDVGGGARRVICe-keld<br/> -dcssgwsyeghcKVFQSKTI--WADAESFCTKQvNgGHLVLSIESSGEADFGQLIAQkIKSakiHVVIGLRAQNKKEKQCSIEVSDGSSI--YENWIIEEESKK-----CLGVHIEtgFhKWENFYEQQDPFVChA----</p> <p><b>Proposed:</b> aliSize=108 (resi) RMSD=1.89 (Å)<br/> -----D-YEILFSDETMNYADAGTYQQR-G-MALVLSsaMRDSTMVKAII LAFTEV-KGH--DYVVGADNLDG-AYNflwndgvs lptdsdlwspNEPSNPqswQLCVQIWSKY-N-LLDDVGGGARRVICeKeld<br/> dcssgwsyEgHCYKVFQSKTWADAESFCTKQvNgGHLVLS--IESSGEADFGQLIAQkIKSakiHVVIGLRAQNKKEKQCSIEVSDGSSI--YENWIIEEESKK-----SKKCLGVHIEtgFhKWENFYEQQDPFVChA----</p>                                      |
| 1051 | <p><b>lbyfA</b><br/>(123)</p> <hr/> <p><b>luosA</b><br/>(133)</p> | M | 14.63 | <p><b>TM-align:</b> aliSize=96 (resi) RMSD=2.46 (Å)<br/> -----DYEILFSDETMNYADAGTYQSRG--MALVLSsaMRDSTMVKAII LAFTEV-K-G--HDYVVGADNLDG-AYNflwndgvs lptdsdlwspnepns-----NPqsWQLCVQIWSKY-N-LLDDVGGGARRVICeKELD-<br/> hcpsdwydydQHCFYRIFNEEINWEDAWEFCTKQakGHLVLS--IKSAKEADFVAWMVTQnIEEs fSHVSIIGLRVQNKKEKQCS-----tkwsdgs svsydnllDLY--ITKCSLLKKEtgFrKWFVAsCIKIPFVCKFPPOc</p> <p><b>SARST:</b> aliSize=110 (resi) RMSD=8.52 (Å)<br/> d-----YEILFSDETMNYADAGTYQQR--GMAVLSsaMRDSTMVKAII LAFTE---VKGHDYVVGADNLDGAYN-FLVNDGVSLptdsdlwspNEPSNPQSWQL-CVQIWSKYN--LLDDVGGGARRVICeKELD-d<br/> -hcpsdwydydQHCFYRIFNEEINWEDAWEFCTKQakGHLVLS--IKSAKEADFVAWMVTQnIEEs fSHVSIIGLRVQNKKEKQCSIEVSDGSSV-----SYDNLLDLYITKCSLLKKEtgFrKWFVAsCIKIPFVCKFPPOc-</p> <p><b>BLAST:</b> aliSize=52 (resi) iden=21.95% (27/123) simi=42.28% (52/123)<br/> d-----YEILFSDETMNYADAGTYQQR--SRMAVLS-SAMRDSTMVKAII LAFTEV---VKGHDYVVGADNLDGAYN-FLVNDGVSLPTDSdlwspNEPSNPQSWQL-CVQIWSKYNLLDDVGGGARRVICeKELD-<br/> -hcpsdwydydqhcYRIFNEEINWEDAWEFCTKQakGHLVLSIKSAKEADFVAWMVTQnIEEs fSHVSIIGLRVQNKKEKQCSIEVSDGSSVSYDNllDLYITKCSllKKEtgFrKWFVAsCIKIPFVCKFPPOc-----qiwsdynllddvgcgarrvickeld</p> <p><b>Proposed:</b> aliSize=109 (resi) RMSD=2.04 (Å)<br/> -----DYEILFSDETMNYADAGTYQSRG--MALVLSsaMRDSTMVKAII LAFTEV-K-G--HDYVVGADNLDG-AYNflwndgvs lptdsdlwspNEPSNPqswQLCVQIWSKY-N-LLDDVGGGARRVICeKELD-<br/> hcpsdwydydQHCFYRIFNEEINWEDAWEFCTKQakGHLVLS--IKSAKEADFVAWMVTQnIEEs fSHVSIIGLRVQNKKEKQCSIEVSDGSSVSYDNllDLYITKCSllKKEtgFrKWFVAsCIKIPFVCKFPPOc</p> |
| 1052 | <p><b>lbyfA</b><br/>(123)</p> <hr/> <p><b>lj34A</b><br/>(129)</p> | M | 13.82 | <p><b>TM-align:</b> aliSize=94 (resi) RMSD=2.50 (Å)<br/> -----DYEILFSDETMNYADAGTYQQR-G-MALVLSsaMRDSTMVKAII LAFTEV-K--G-HDYVVGADNLDG-AYNflwndgvs lptdsdlwspnepns-----Pq-SWQLCVQIWSKY-N-LLDDVGGGARRVICeKeld<br/> dcpsgwsyegHCYKPFKLYKTWDAERFCTEQakGHLVLS--IESAGEADFVAQLVTEnIqnTkSYVVIIGLRVQKKEKQCS-----IewsdgssisyenwiE-aESKTCLEKETGFrKWNVIYCCQONPFVChA---</p> <p><b>SARST:</b> aliSize=105 (resi) RMSD=9.00 (Å)<br/> d-----YEILFSDETMNYADAGTYQQR--GMAVLSsaMRDSTMVKAII LAFTEV---KGHDYVVGADNLDGAYN-FLVNDGVSLptdsdlwspNEPSNP-QSWQLCVQIWSKYN--LLDDVGGGARRVICe-keld<br/> -dcpsgwsyegHCYKPFKLYKTWDAERFCTEQakGHLVLS--IESAGEADFVAQLVTEnIqnTKSYVVIIGLRVQKKEKQCSIEVSDGSSI-----SSVSYENWIEAESKTCLEKETGFrKWNVIYCCQONPFVChA----</p> <p><b>BLAST:</b> aliSize=47 (resi) iden=19.51% (24/123) simi=38.21% (47/123)<br/> dyeilfsdetmny-----DAGTYQ--SRMAVLS-SAMRDSTMVKAII LAFTEVKGHDYVVGADNLDGAYN-FLVNDGVSLPTDSdlwspNEPSNPqswQLCVQIWSKYNLLDDVGGGARRVICe-keld<br/> -----dcpsgwsyeghcypklyktwdaerfcteqakGHLVLSIESAGEADFVAQLVTENIQNTKSYVVIIGLRVQKKEKQCSIEVSDGSSI--SYENWIEAESKTCLEKETGFrKWNVIYCCQONPFVChA----</p> <p><b>Proposed:</b> aliSize=108 (resi) RMSD=2.01 (Å)<br/> -----DYEILFSDETMNYADAGTYQQR-G-MALVLSsaMRDSTMVKAII LAFTEV-K--G-HDYVVGADNLDG-AYNflwndgvs lptdsdlwspNEPSNPqswQLCVQIWSKY-N-LLDDVGGGARRVICeKeld<br/> dcpsgwsyegHCYKPFKLYKTWDAERFCTEQakGHLVLS--IESAGEADFVAQLVTEnIqnTkSYVVIIGLRVQKKEKQCSIEVSDGSSI--SYENWIEAESKTCLEKETGFrKWNVIYCCQONPFVChA----</p>                                                            |

|      |                                               |   |       |                                                                                                                                                                                                                                                                                                                                                                                                                                                                                                                                                                                                                                                                                                                                                                                                                                                                                                                                                                                                                                                                                                                                                                                                                                                                                                                                                                                                         |
|------|-----------------------------------------------|---|-------|---------------------------------------------------------------------------------------------------------------------------------------------------------------------------------------------------------------------------------------------------------------------------------------------------------------------------------------------------------------------------------------------------------------------------------------------------------------------------------------------------------------------------------------------------------------------------------------------------------------------------------------------------------------------------------------------------------------------------------------------------------------------------------------------------------------------------------------------------------------------------------------------------------------------------------------------------------------------------------------------------------------------------------------------------------------------------------------------------------------------------------------------------------------------------------------------------------------------------------------------------------------------------------------------------------------------------------------------------------------------------------------------------------|
| 1053 | <p>1kzal<br/>(115)</p> <p>1oz7B<br/>(123)</p> | M | 19.13 | <p><b>TM-align:</b> aliSize=91 (resi) RMSD=2.05 (Å)<br/> -----NVGKKYFMSSVRRMPLNRKALCSE-LQ-GTVATPRNAEENRAIQNVA---KDVAFLEITDQRTEnVfedltgnrvrytnwnegepnnvg-----S-GENCVVLLTN-GKINDVPCSDSFLVCEFS-<br/> nc1pdwsVYEGYCYKVFKERMWNWADAEKFKTKqhkDHLVSFRNSKEVDFVISAfPmlkNDLVWIGLTDYWRD-cN-----wewsdaqldykawDnERHCFIYKNTdNQWTRRDITWTISFVCKCPa</p> <p><b>SARST:</b> aliSize=84 (resi) RMSD=5.85 (Å)<br/> n-----VGKKYFMSSVRRMPLNRKALCSEL--QGTVATPRNAEENRAIQNVA---DVAFLGITD---QRT-----ENVFED--LTGnrvrytnwnegepnnvgsgencvvl1tngKINDVPCSDSFLVCEF--s<br/> -nc1pdwsVYEGYCYKVFKERMWNWADAEKFKTKqhkDHLVSFRNSKEVDFVISAfPmlkNDLVWIGLTDYWRDcNwewsdaqldykawDnERHCFIYkNTD-----QWTRRDITWTISFVCKCPa-</p> <p><b>BLAST:</b> aliSize=50 (resi) iden=21.74% (25/115) simi=43.48% (50/115)<br/> nvgkkyfmssvr-----RPLNRKALCSELQ--QTVATPRNAEENRAIQNVA---NRAIQNVAKDVAFLEITDQRTENVFDLTLNVRVRYTNWnegepnnvgsgencvlltngKINDVPCSDSFLVCE---fs<br/> -----nc1pdwsVYEGYCYKVFKERMWNWADAEKFKTKqhkDHLVSFRNSKEVDFVISAfPMLKNDLVWIGLTDYWRDCNWEWSDAQLDYKAND---NE----RHCFIYKNTDQWTRRDITWTISFVCKcpa--</p> <p><b>Proposed:</b> aliSize=106 (resi) RMSD=1.68 (Å)<br/> -----NVGKKYFMSSVRRMPLNRKALCSE-LQ-GTVATPRNAEENRAIQNVA---KDVAFLEITDQRTeNV-FEDLTLNVRVRYTNWnegepnnvsgencvlltngKINDVPCSDSFLVCEFS-<br/> nc1pdwsVYEGYCYKVFKERMWNWADAEKFKTKqhkDHLVSFRNSKEVDFVISAfPmlkNDLVWIGLTDYWR-DCNwewsdaqldykawDnERHCFIYKNTdNQWTRRDITWTISFVCKCPa</p>                           |
| 1054 | <p>1kzal<br/>(115)</p> <p>1ukmB<br/>(124)</p> | M | 16.52 | <p><b>TM-align:</b> aliSize=93 (resi) RMSD=2.28 (Å)<br/> -----NVGKKYFMSSVRRMPLNRKALCSEL-Q-GTVATPRNAEENRAIQNVA---K--DVAFLGITDQRTENVfedltgnrvrytnwnegepnnv-----GSGENCVVLLTN---GKINDVPCSDSFLVCEFS-<br/> cplgwsSFDQHCYKVFEPVKNWTEAEEICMQQhKGSRLASIHSSSEEEAFVSKLaskaLkftSMWIGLNNPWKDC-----wewsdnarfdykawKRRPYCTVMVVKpdrIFWFRTRGCEKSVSFVCKELt</p> <p><b>SARST:</b> aliSize=106 (resi) RMSD=9.81 (Å)<br/> n-----VGKKYFMSSVRRMPLNRKALCSEL--QGTVATPRNAEENRAIQNVA---VAND-VAFLEITDQRTEN-VFEDLTLNVRVRYTNWnegepnnvsgencvlltngKINDVPCSDSFLVCE---s<br/> -cplgwsSFDQHCYKVFEPVKNWTEAEEICMQQhKGSRLASIHSSSEEEAFVSKLaskaLkftSMWIGLNNPW-KDCkEWSDNARFDKAKA----WKRPPYCTVMVVKpdrIFWFRTRGCEKSVSFVCKELt-</p> <p><b>BLAST:</b> aliSize=43 (resi) iden=20.00% (23/115) simi=37.39% (43/115)<br/> nvgkkyfmssvrrmplnr-----KALCSEL-QGTVATPRNAEENRAIQNVA---KDVAF-----LITDQRTENVFDLTLNVRVRYTNWnegepnnvsgencvlltngK---INDVPCSDSFLVCE---s<br/> -----cplgwsSFDQHCYKVFEPVKNWTEAEEICMQQhKGSRLASIHSSSEEEAFVSKLaskaLkftSMWIGLNNPWKDC-KWSDNARFDKAKA---RRPYCTVMVVKpdrIFWFRTRGCEKSVSFVCKELt-</p> <p><b>Proposed:</b> aliSize=106 (resi) RMSD=1.64 (Å)<br/> -----NVGKKYFMSSVRRMPLNRKALCSE-LQ-GTVATPRNAEENRAIQNVA---K--DVAFLGITDQRTENV-FEDLTLNVRVRYTNWnegepnnvsgencvlltngKINDVPCSDSFLVCEFS-<br/> cplgwsSFDQHCYKVFEPVKNWTEAEEICMQQhKGSRLASIHSSSEEEAFVSKLaskaLkftSMWIGLNNPWKDC-KWSDNARFDKAKA---RRPYCTVMVVKpdrIFWFRTRGCEKSVSFVCKELt</p>                 |
| 1055 | <p>1kzal<br/>(115)</p> <p>1ukmA<br/>(131)</p> | M | 22.61 | <p><b>TM-align:</b> aliSize=93 (resi) RMSD=1.88 (Å)<br/> -----NVGKKYFMSSVRRMPLNRKALCSE-LQ-GTVATPRNAEENRAIQNVA-KD-----VAFLGITDQRT-T--ENVfedltgnrvrytnwnegepnn-----VG--SGENCVVLLT-N--GKINDVPCSDSFLVCEFS-<br/> dcpsdwtAYDQHCYLAIGEPQNWYEAERFTEqAkDHLVSIQSREEGNFVAQLVSGfmhrseiYVWIGLRRReEqcN-----pewndgskiiyvNWKegESKMCQGLTKWInfHDWNNINCELYPFVCKFsa</p> <p><b>SARST:</b> aliSize=106 (resi) RMSD=9.51 (Å)<br/> n-----VGKKYFMSSVRRMPLNRKALCSEL--QGTVATPRNAEENRAIQNVA-----VAKDVAFLEITDQRTENV--FEDLTLNVRVRYTNWnegepnnvsgencvlltngKINDVPCSDSFLVCE---s<br/> -dcpsdwtAYDQHCYLAIGEPQNWYEAERFTEqAkDHLVSIQSREEGNFVAQLVSGfmhrSEIY-VWIGLRRREEQcNPEWNDISKIIVVWKEG-----ESKMCQGLTKWInfHDWNNINCELYPFVCKFsa-</p> <p><b>BLAST:</b> aliSize=57 (resi) iden=29.57% (34/115) simi=49.57% (57/115)<br/> nvgkkyfmssvrrm-----PLN---RKAALCSEL--QGTVATPRNAEENRAIQNVA---KDV-AFLGITDQRTENV-FEDLTLNVRVRYTNWnegepnnvsgencvlltngKINDVPCSDSFLVCEFS-<br/> -----dcpsdwtAYDQHCYLAIGEPQNWYEAERFTEqAkDHLVSIQSREEGNFVAQLVSGfmhrSEIYVWIGLRRREEQcNPEWNDISKIIVVWKEG-ESKMCQGLTKWInfHDWNNINCELYPFVCKFsa</p> <p><b>Proposed:</b> aliSize=107 (resi) RMSD=1.34 (Å)<br/> -----NVGKKYFMSSVRRMPLNRKALCSE-LQ-GTVATPRNAEENRAIQNVA-KD-----VAFLGITDQRT-T--ENV-FEDLTLNVRVRYTNWnegepnnvsgencvlltngKINDVPCSDSFLVCEFS-<br/> dcpsdwtAYDQHCYLAIGEPQNWYEAERFTEqAkDHLVSIQSREEGNFVAQLVSGfmhrseiYVWIGLRRReEqcNPEWNDISKIIVVWKEG-----ESKMCQGLTKWInfHDWNNINCELYPFVCKFsa</p> |



|      |                                             |   |       |                                                                                                                                                                                                                                                                                                                                                                                                                                                                                                                                                                                                                                                                                                                                                                                                                                                                                                                                                                                                                                                                                                                                                                                                                                                                                                                                                                                                  |
|------|---------------------------------------------|---|-------|--------------------------------------------------------------------------------------------------------------------------------------------------------------------------------------------------------------------------------------------------------------------------------------------------------------------------------------------------------------------------------------------------------------------------------------------------------------------------------------------------------------------------------------------------------------------------------------------------------------------------------------------------------------------------------------------------------------------------------------------------------------------------------------------------------------------------------------------------------------------------------------------------------------------------------------------------------------------------------------------------------------------------------------------------------------------------------------------------------------------------------------------------------------------------------------------------------------------------------------------------------------------------------------------------------------------------------------------------------------------------------------------------|
| 1056 | <p>lkzal (115)</p> <hr/> <p>luexA (125)</p> | M | 19.13 | <p><b>TM-align:</b> aliSize=92 (resi) RMSD=1.80 (Å)<br/> -----NVGKKYFMSSVRRMPLNRKALCSELOQTIVATPRNAENRAIQNVV---K---DVAFLGITDQRT--ENVfedl tgnrvrytnwnegepnn-----VGSGENCVLLT--N-GKWNVPCSDSFLVWCEFS-<br/> gclpdwsSYKGHCYKVFVKVGTWEDAEKFCVENSCHLASIDSKFEADFTKLA sqtLtkfvYDfWICLRDESKtqqCS-----pqtwdgssvvyenVDEPTKCFGDVHTeyRTWTLPCGEKNPFIICKS-</p> <p><b>SARST:</b> aliSize=101 (resi) RMSD=8.48 (Å)<br/> n-----VGKKYFMSSVRRMPLNRKALCSELOQTIVATPRNAENRAIQNV-----AKDVAFLEITDqRTENVEEDL-----TNRVRTNWnegepnnvGSGENCVLLTNG---KWNVPCSDSFLVWCE-fs<br/> -gclpdwsSYKGHCYKVFVKVGTWEDAEKFCVENSCHLASIDSKFEADFTKLA sqtLtkfvYDfWICLR---DESKTQOCspqtDfSSVVENV-----DEPTKCFGDVHTeyrTWTLPCGEKNPFIICKs--</p> <p><b>BLAST:</b> aliSize=47 (resi) iden=25.22% (29/115) simi=40.87% (47/115)<br/> nvgkkyfmssvrrmplnr-----KALCSELOQTIVATPRNAE-----NRRAIQNVAKDV---FLEGITDQ-RTENVEEDL--ENRVRTNWNEgePNNvgSGENCvLLTNGKWNVPCSDSFLVWCE-fs<br/> -----gclpdwsSYKGHCYKVFVKVGTWEDAEKFCVENSCHLASIDSKFEADFTKLA sqtLtkfvYDfWICLRDESKTQOCSPQWtdfSSVVENVDE--PTKC-FGLD--VHTEYRTWTLPCGEKNPFIICKs--</p> <p><b>Proposed:</b> aliSize=105 (resi) RMSD=1.53 (Å)<br/> -----NVGKKYFMSSVRRMPLNRKALCSELOQTIVATPRNAENRAIQNVV---K---DVAFLGITDQRT--eNVFEDLTGNRVRTNWnegepnnvGSGENCVLLT--N-GKWNVPCSDSFLVWCEFS-<br/> gclpdwsSYKGHCYKVFVKVGTWEDAEKFCVENSCHLASIDSKFEADFTKLA sqtLtkfvYDfWICLRDESKtqq-CSPQWtdfSSVVENV-----DEPTKCFGDVHTeyRTWTLPCGEKNPFIICKS-</p> |
| 1057 | <p>lkzal (115)</p> <hr/> <p>lj34B (123)</p> | M | 17.39 | <p><b>TM-align:</b> aliSize=93 (resi) RMSD=2.08 (Å)<br/> -----NVGKKYFMSSVRRMPLNRKALCSE-LQ-ITVATPRNAENRAIQNVV---K---DVAFLGIT-DQRTENVfedl tgnrvrytnwnegepnn-----VGSGENCVLLT--NGKWNVPCSDSFLVWCEFS-<br/> dcpsdwsSYEGHCYKPFSEPKNWADAEENFTQqHagCHLVSFQSSEADFFVVKLA fqtFghSIFWMGLSNVWNOCN-----wqwsnaamlrykaWAEESYCVYFKStNNKWSRACRMMAQFVCEFa</p> <p><b>SARST:</b> aliSize=106 (resi) RMSD=10.16 (Å)<br/> n-----VGKKYFMSSVRRMPLNRKALCSEL--QITVATPRNA-----EENRAIQNVAKDVAFLEITDQRTENVEEDLTGNRVRTNWnegepnnvGSGENCVLLTNGKWNVPCSDSFLVWCE--s<br/> -dcpsdwsSYEGHCYKPFSEPKNWADAEENFTQqHagCHLVSFQSSEadffvVKLAfqtFghSIFWMGLSNVWNOCNWQWSNAAMLRYKAWAE-----ESYCVYFKStNNKWSRACRMMAQFVCEFa-</p> <p><b>BLAST:</b> aliSize=44 (resi) iden=23.48% (27/115) simi=38.26% (44/115)<br/> nvgkkyfmssvrrm-----LNRAK---LSELO--ITVATPRNAE-----NRRAIQNVAKDVAFLEITDQRTENVEEDLTGNRVRTNWNEgePnnvgsGENCVLLT--NGKWNVPCSDSFLVWCE--s<br/> -----dcpsdwsSYEGHCYKPFSEPKNWADAEENFTQqHagCHLVSFQSSEadffvVKLAfqtFghSIFWMGLSNVWNOCNWQWSNAAMLRYKAWAE-E-----SYCVYFKStNNKWSRACRMMAQFVCEFa-</p> <p><b>Proposed:</b> aliSize=105 (resi) RMSD=1.68 (Å)<br/> -----NVGKKYFMSSVRRMPLNRKALCSE-LQ-ITVATPRNAENRAIQNVV---K---DVAFLGITDQ--rtENVEEDLTGNRVRTNWnegepnnvGSGENCVLLT--NGKWNVPCSDSFLVWCEFS-<br/> dcpsdwsSYEGHCYKPFSEPKNWADAEENFTQqHagCHLVSFQSSEADFFVVKLA fqtFghSIFWMGLSNVwn--QCWQWSNAAMLRYKAW-----AEESYCVYFKStNNKWSRACRMMAQFVCEFa</p>                    |
| 1058 | <p>lkzal (115)</p> <hr/> <p>ljwiB (123)</p> | M | 16.52 | <p><b>TM-align:</b> aliSize=93 (resi) RMSD=2.32 (Å)<br/> -----NVGKKYFMSSVRRMPLNRKALCSEL-Q-ITVATPRNAENRAIQNVV---KDVAFLEGITDQ-RTENVfedl tgnrvrytnwnegepnnv-----GS-GENCVLLTN-GKWNVPCSDSFLVWCEFS-<br/> gclpdwsSYKGHCYKVFKEKTWADAEKFCKElvngCHLMSVNSREEGEFISKLAlekMRIVLVWIGLSHFwRICPL-----rwtDgarldyralSDEPICFVAESFhNKWIQWTNRKKSFFVCKYRv</p> <p><b>SARST:</b> aliSize=83 (resi) RMSD=6.92 (Å)<br/> n-----VGKKYFMSSVRRMPLNRKALCSEL--QITVATPRNAENRAIQNV-----VAKDVAFLEIT-----DQ-----RTENVFED-----LTGNrvrytnwnegepnnvgsGENcvlltngKWNVPCSDSFLVWCE--s<br/> -gclpdwsSYKGHCYKVFKEKTWADAEKFCKElvngCHLMSVNSREEGEFISKLAlekMRIVLVWIGLSHFwricplrwtDgarldyralSDEPICFvaesFHN-----KWIQWTNRKKSFFVCKYrv-</p> <p><b>BLAST:</b> aliSize=40 (resi) iden=20.87% (24/115) simi=34.78% (40/115)<br/> nvgkkyfmssvrrmplnr-----KALCSELQ--ITVATPRNAENRAIQNVkdvafLgITDQRTENVFEDLTGN-RVRYTNWNEEPNNVG--SGEN--VLLT--NGKWNVPCSDSFLVWCE--s<br/> -----gclpdwsSYKGHCYKVFKEKTWADAEKFCKElvngCHLMSVNSREEGEFISKLA-----LEKMRIVLVWIGLSHFwRICPLRWTDGARLDYRALSDDEPICFVAESfHNKWIQWTNRKKSFFVCKYrv-</p> <p><b>Proposed:</b> aliSize=105 (resi) RMSD=1.69 (Å)<br/> -----NVGKKYFMSSVRRMPLNRKALCSE-LQ-ITVATPRNAENRAIQNVV---KDVAFLEGITDQ--rtENVFEDLTGNRVRTNWNEgePnnvgsGENCVLLTN-GKWNVPCSDSFLVWCEFS-<br/> gclpdwsSYKGHCYKVFKEKTWADAEKFCKElvngCHLMSVNSREEGEFISKLAlekMRIVLVWIGLSHFwR--ICPLRWTDGARLDYRALSD-----EPICFVAESFhNKWIQWTNRKKSFFVCKYRv</p>            |

|      |                                                     |   |       |                                                                                                                                                                                                                                                                                                                                                                                                                                                                                                                                                                                                                                                                                                                                                                                                                                                                                                                                                                                                                                                                                                                                                                                                                                                                                                                                                                                                     |
|------|-----------------------------------------------------|---|-------|-----------------------------------------------------------------------------------------------------------------------------------------------------------------------------------------------------------------------------------------------------------------------------------------------------------------------------------------------------------------------------------------------------------------------------------------------------------------------------------------------------------------------------------------------------------------------------------------------------------------------------------------------------------------------------------------------------------------------------------------------------------------------------------------------------------------------------------------------------------------------------------------------------------------------------------------------------------------------------------------------------------------------------------------------------------------------------------------------------------------------------------------------------------------------------------------------------------------------------------------------------------------------------------------------------------------------------------------------------------------------------------------------------|
| 1059 | <p>lkzal<br/>(115)</p> <hr/> <p>lv4lB<br/>(125)</p> | M | 17.39 | <p><b>TM-align:</b> aliSize=92 (resi) RMSD=2.03 (Å)<br/> -----NVGKKYFMSSVRRMPLNRKALCSEL-LQ-GTVATPRNAENRAIQNVA---K---VAFLGIT-DORTENVfedltgnrvrytnwEgepnnv-----GSGENCVLL-LNGKNDVPCSDSFLVCEFS-<br/> gfcclgwsSYDEHCYQVFOQKNWEDA EKFC TQqHRgSHLVSFHSSEVDFVVSKTspiLkhFVVMGLSNVWNECA-----kewsdg tkldykawSGQSDITSKtIDNQLSMDCSSKRYVVKFKQa</p> <p><b>SARST:</b> aliSize=105 (resi) RMSD=9.80 (Å)<br/> n-----VGKKYFMSSVRRMPLNRKALCSEL--QGTVATPRNAENRAIQNVA---IQNVAKVAFLGITDORTENVFEDLTGNRVRTNNEgepnnvsgGENCVLL-LNGKNDVPCSDSFLVCEFS--s<br/> -gfcclgwsSYDEHCYQVFOQKNWEDA EKFC TQqHRgSHLVSFHSSEVDFVVSktSPI LKH FVVMGLSNVWNECAKFWSDTKLDYKA-----SGQ---SDITSKtIDNQLSMDCSSKRYVVKFKqa-</p> <p><b>BLAST:</b> aliSize=32 (resi) iden=14.78% (17/115) simi=27.83% (32/115)<br/> nvgkkyfmssvrrmplnrakalcselqgtvatprnaenraiqnv-----VAFLGITDORTENVFEDLTGNRVRTNNEgepnnvsgGENCVLL-LNGKNDVPCSDSFLVCEFS--s<br/> -----gfcclgwsSYDEHCYQVFOQKNWEDA EKFC TQqHRgSHLVSFHSSEVDFVVSktspiLkhFVVMGLSNVWNECAKFWSDTKLDYKA-----SGQ---SDITSKtIDNQLSMDCSSKRYVVKFKqa-</p> <p><b>Proposed:</b> aliSize=106 (resi) RMSD=1.56 (Å)<br/> -----NVGKKYFMSSVRRMPLNRKALCSEL-LQ-GTVATPRNAENRAIQNVA---K---VAFLGIT-DORTENVFEDLTGNRVRTNNEgepnnvsgGENCVLL-LNGKNDVPCSDSFLVCEFS-<br/> gfcclgwsSYDEHCYQVFOQKNWEDA EKFC TQqHRgSHLVSFHSSEVDFVVSKTspiLkhFVVMGLSNVWNECAKFWSDTKLDYKA-----SGQ---SDITSKtIDNQLSMDCSSKRYVVKFKQa</p>                                        |
| 1060 | <p>lkzal<br/>(115)</p> <hr/> <p>liodA<br/>(129)</p> | M | 17.39 | <p><b>TM-align:</b> aliSize=92 (resi) RMSD=2.04 (Å)<br/> -----NVGKKYFMSSVRRMPLNRKALCSEL-LQ-GTVATPRNAENRAIQNVA---KD---VAFLGITDORT-ENVfedltgnrvrytnwEgepnn-----VSGGENCVLLT--N-GKNDVPCSDSFLVCEFS<br/> dcssgwsSYEGHCYKVFQKSKTWADAESFCTKQvNgHLVSI ESSGADFVGQLIaqkIKsakiHVVWIGLRAKNEKQC-----siewsdgssi syenwiEEESKKCLGVHIetGfHKWENFYEQQDPFVCHA-</p> <p><b>SARST:</b> aliSize=85 (resi) RMSD=9.51 (Å)<br/> n-----VGKKYFMSSVRRMPLNRKALCSEL--QGTVATPRNAENRAIQNVA---VA---VAFLGITDORTENVfedltgnrvrytnwEgepnnvsgGENCVLLTNGK--NDVPCSDSFLVCEFS-<br/> -dcssgwsSYEGHCYKVFQKSKTWADAESFCTKQvNgHLVSI ESSGADFVGQLIaqkIKSakiHVVWIGLRA-----NKEKQCS-----IEWSDSSISyenwiEEESKKCLGVHIetGfHKWENFYEQQDPFVCHA--</p> <p><b>BLAST:</b> aliSize=30 (resi) iden=18.26% (21/115) simi=26.09% (30/115)<br/> nvgkkyfmssvrrmplnrakalcselqgtvatprnaenraiqnv-----AKDVAFLGITDORTENVFEDLTGNRVRTNNEgepnnvsgGENCVLLTNGK--KNDVPCSDSFLVCEFS-<br/> -----dcssgwsSYEGHCYKVFQKSKTWADAESFCTKQvNgHLVSI ESSGADFVGQLIaqkIKSakiHVVWIGLRAKNEKQCSIEWSDSSISyenwiEEESKKCLGVHIetGfHKWENFYEQQDPFVCHA--</p> <p><b>Proposed:</b> aliSize=107 (resi) RMSD=1.53 (Å)<br/> -----NVGKKYFMSSVRRMPLNRKALCSEL-LQ-GTVATPRNAENRAIQNVA---KD---VAFLGITDORT-ENVFEDLTGNRVRTNNEgepnnvsgGENCVLLT--N-GKNDVPCSDSFLVCEFS<br/> dcssgwsSYEGHCYKVFQKSKTWADAESFCTKQvNgHLVSI ESSGADFVGQLIaqkIKsakiHVVWIGLRAKNEKQCIEWSDSSISyenwiEEESKKCLGVHIetGfHKWENFYEQQDPFVCHA-</p>                     |
| 1061 | <p>lkzal<br/>(115)</p> <hr/> <p>luosA<br/>(133)</p> | M | 15.65 | <p><b>TM-align:</b> aliSize=93 (resi) RMSD=1.99 (Å)<br/> -----NVGKKYFMSSVRRMPLNRKALCSELQ--GTVATPRNAENRAIQNVA---K---DVAFLGITDORT---ENVfedltgnrvrytnwEgepnn-----VSGGENCVLLT--N-GKNDVPCSDSFLVCEFS---<br/> hcpsdwyYDQHCYRIFNEENWEDA EWFCTKQakGHLVSIKSAKEADFAWVMtqnIeesfSHVSI GLRVQNKekqCS-----tkwsdgssvsydnlLDLYITKCSLLKKEtGfRkWFVASCIGKIPFVCKPppqc</p> <p><b>SARST:</b> aliSize=98 (resi) RMSD=9.83 (Å)<br/> n-----VGKKYFMSSVRRMPLNRKALCSEL--QGTVATPRNAENRAIQNV-----AKDVAFLGITDORTE--NVFEDLTGNRVRTNNEgepnnvsgGENCVLLTNGK--NDVPCSDSFLVCEFS--s<br/> -hcpsdwyYDQHCYRIFNEENWEDA EWFCTKQakGHLVSIKSAKEADFAWVMtqnIeesfSHVSI GLRVQNKekqCSKWSWSSSNDLLD-----LYITK-----SllkktgfrkwFVASCIGKIPFVCKPppqc-</p> <p><b>BLAST:</b> aliSize=34 (resi) iden=19.13% (22/115) simi=29.57% (34/115)<br/> nvgkkyfmssvrrmplnrakalcselqgtvatprnaenraiqnv-----AKDVAFLGITDORTENVFEDLTGNRVRTNNEgepnnvsgGENCVLLTNGK--KNDVPCSDSFLVCEFS--s<br/> -----hcpsdwyYDQHCYRIFNEENWEDA EWFCTKQakGHLVSIKSAKEADFAWVMtqnIeesfSHVSI GLRVQNKekqCSKWSWSSSNDLLDLYITKCSLLKKEtGfRkWFVASCIGKIPFVCKPppqc-</p> <p><b>Proposed:</b> aliSize=105 (resi) RMSD=1.36 (Å)<br/> -----NVGKKYFMSSVRRMPLNRKALCSELQ--GTVATPRNAENRAIQNVA---K---DVAFLGITD-----rteNVFEDLTGNRVRTNNEgepnnvsgGENCVLLT--N-GKNDVPCSDSFLVCEFS--s<br/> hcpsdwyYDQHCYRIFNEENWEDA EWFCTKQakGHLVSIKSAKEADFAWVMtqnIeesfSHVSI GLRVQNKekq-----CSTKWSWSSSNDLLDLYITKCSLLKKEtGfRkWFVASCIGKIPFVCKPppqc</p> |

|      |                |   |       |                                                                                                                                                                                                                                                                                                                                                                                                                                                                                                                                                                                                                                                                                                                                                                                                                                                                                                                                                                                                                                                                                                                                                                                                                                                                                                                                                                                                            |
|------|----------------|---|-------|------------------------------------------------------------------------------------------------------------------------------------------------------------------------------------------------------------------------------------------------------------------------------------------------------------------------------------------------------------------------------------------------------------------------------------------------------------------------------------------------------------------------------------------------------------------------------------------------------------------------------------------------------------------------------------------------------------------------------------------------------------------------------------------------------------------------------------------------------------------------------------------------------------------------------------------------------------------------------------------------------------------------------------------------------------------------------------------------------------------------------------------------------------------------------------------------------------------------------------------------------------------------------------------------------------------------------------------------------------------------------------------------------------|
| 1062 | lkzal<br>(115) | M | 20.87 | <p><b>TM-align:</b> aliSize=92 (resi) RMSD=1.93 (Å)<br/> -----NVGKKYFMSSVRRMPLNRKALCSEL-Q-GTVATPRNAEENRAIQNVA---K----DVAFLGITDQR-T-ENVfedltgnrvrytnwngepnn-----VGSGENCVWLT--N-GKWNVPCSDSFLVCFs<br/> dcpsgwsSYEGHCYKPFKLYKTWDDAERFCTEQakGHLVSIESAGEADFVAQLVtenIqntkSYVWIGLRVQgkEkQC-----ssewsdgssvsyenwiEAESKTCLGLEKtGfRKWNVIYGOQNPFCa-</p> <p><b>SARST:</b> aliSize=85 (resi) RMSD=11.67 (Å)<br/> n-----VGKKYFMSSVRRMPLNRKALCSEL--Q-GTVATPRNAEENRAIQN-----VAKD-----VAFGLITDORTENVFED--LTgnrvrytnwngepnnvsgcncvlltNGKWNVPCSDSFLVCFE-fs<br/> -dcpsgwsSYEGHCYKPFKLYKTWDDAERFCTEQakGHLVSIESAGEADFVAQLVtenIqntkSYVWIGLRVQgkEkQC-----ssewsdgssvsyenwiEAESKTCLGLEKtGfRKWNVIYGOQNPFCa--</p> <p><b>BLAST:</b> aliSize=34 (resi) iden=22.61% (26/115) simi=29.57% (34/115)<br/> nvgkkyfmssvrrmplnrakalcselqgtvatprnae-----DVAFLGITDORTENVF--DLTNRVRIITNNEGEpnnvsgsGENCVWLT--LTNG--KWNVPCSDSFLVCFE-fs<br/> -----dcpsgwsSYEGHCYKPFKLYKTWDDAERFCTEQakGHLVSIESAGEADFVAQLVtenIqntkSYVWIGLRVQgkEkQC-----ssewsdgssvsyenwiEAESKTCLGLEKtGfRKWNVIYGOQNPFCa--</p> <p><b>Proposed:</b> aliSize=107 (resi) RMSD=1.53 (Å)<br/> -----NVGKKYFMSSVRRMPLNRKALCSEL-Q-GTVATPRNAEENRAIQNVA---K----DVAFLGITDQR--tENVFDLTNRVRIITNNEGEpnnvsgsGENCVWLT--N-GKWNVPCSDSFLVCFEfs<br/> dcpsgwsSYEGHCYKPFKLYKTWDDAERFCTEQakGHLVSIESAGEADFVAQLVtenIqntkSYVWIGLRVQgkEkQC-----ssewsdgssvsyenwiEAESKTCLGLEKtGfRKWNVIYGOQNPFCa-</p>                      |
| 1063 | lyttA<br>(115) | M | 19.13 | <p><b>TM-align:</b> aliSize=91 (resi) RMSD=2.18 (Å)<br/> -----SGKKFFVTNHERMPFSKVKALCSEL-R-GTVAIPRNAEENKAIQEV-VA---KTS AFLGITDEVTeg-Qfmyvtggrltytnwkdepndhg-----S-GEDCVTIV-DNGLNDISQASHTAVCFEPA<br/> ncldpwsvYEGYCYKVFKERLNWADA EKFC TKQhkdCHLV SFRNSKEVDFV I S I Afpm1kNDLVWIGLTDYWRD-cN-----wewsdgaqldykawDnERHCFIYKnTDNQWTRRD TWTF SFVCKCPA</p> <p><b>SARST:</b> aliSize=104 (resi) RMSD=9.43 (Å)<br/> s-----GKKFFVTNHERMPFSKVKALCSEL--RGTVAIPRNAEENKAIQEV-----AKTS AFLGITDEVTeg-QfmyvtggrltytnwkdepndhgsgedCVTIV-DNGLNDISQASHTAVCFEPA-a<br/> -ncldpwsvYEGYCYKVFKERLNWADA EKFC TKQhkdCHLV SFRNSKEVDFV I S I Afpm1kNDLVWIGLTDYWRDCNWEWSDAQLDKADNERHCF-----LYKNTDNQWTRRD TWTF SFVCKCPA</p> <p><b>BLAST:</b> aliSize=48 (resi) iden=23.48% (27/115) simi=41.74% (48/115)<br/> sgkkffvtnh-----ERM PFSKVKALCSEL--RGTVAIPRNAEENKAIQEV-----KTS AFLGITDEVTeg-QfmyvtggrltytnwkdepndhgsgedCVTIV--DNGLNDISQASHTAVCFEPA<br/> -----ncldpwsvYEGYCYKVFKERLNWADA EKFC TKQhkdCHLV SFRNSKEVDFV I S I Afpm1kNDLVWIGLTDYWRDCNWEWSDAQLDKADNERHCF-----LYKNTDNQWTRRD TWTF SFVCKCPA</p> <p><b>Proposed:</b> aliSize=106 (resi) RMSD=1.75 (Å)<br/> -----SGKKFFVTNHERMPFSKVKALCSEL-R-GTVAIPRNAEENKAIQEV-VA---KTS AFLGITDEVTeg-QfmyvtggrltytnwkdepndhgsgedCVTIV-DNGLNDISQASHTAVCFEPA<br/> ncldpwsvYEGYCYKVFKERLNWADA EKFC TKQhkdCHLV SFRNSKEVDFV I S I Afpm1kNDLVWIGLTDYWRDCNWEWSDAQLDKADNERHCF-----LYKNTDNQWTRRD TWTF SFVCKCPA</p> |
| 1064 | lyttA<br>(115) | M | 17.39 | <p><b>TM-align:</b> aliSize=93 (resi) RMSD=2.44 (Å)<br/> -----SGKKFFVTNHERMPFSKVKALCSEL-R-GTVAIPRNAEENKAIQEVAK-----TSAFLGITDEVTeg-Qfmyvtggrltytnwkdepndhg-----GSGEDCVTIV-DNGLNDISQASHTAVCFEPA<br/> cplgwsFDQHCYKVFEPVKNWTEAEEIMQOHkgSRLSIHSSSEEFVSKLASKa1kfTSMWIGLNNPWKDGK-----wewsdnarfdykawKRRPYCTVMVkpdrIFWFRGCEKSVSFVCKELT</p> <p><b>SARST:</b> aliSize=107 (resi) RMSD=9.73 (Å)<br/> s-----GKKFFVTNHERMPFSKVKALCSEL--RGTVAIPRNAEENKAIQEVAK-----KTS AFLGITDEVTeg-QfmyvtggrltytnwkdepndhgsgedCVTIV-DNGLNDISQASHTAVCFEPA-a<br/> -cplgwsFDQHCYKVFEPVKNWTEAEEIMQOHkgSRLSIHSSSEEFVSKLASKa1kfTSMWIGLNNPWKDGKWEWSDNARFDYKAWKR-RPY-----CTVMVkpdrIFWFRGCEKSVSFVCKELT-</p> <p><b>BLAST:</b> aliSize=50 (resi) iden=20.00% (23/115) simi=43.48% (50/115)<br/> sgkkffvtnhermp-----FSKVKALCSEL-RGTVAIPRNAEENKAIQEVAK-----TSAFLGITDEVTeg-QfmyvtggrltytnwkdepndhgsgedCVTIV--DNGLNDISQASHTAVCFE--pa<br/> -----cplgwsFDQHCYKVFEPVKNWTEAEEIMQOHkgSRLSIHSSSEEFVSKLASKa1kfTSMWIGLNNPWKDGKWEWSDNARFDYKAWKR-RPY-----CTVMVkpdrIFWFRGCEKSVSFVCKELT--</p> <p><b>Proposed:</b> aliSize=104 (resi) RMSD=1.80 (Å)<br/> -----SGKKFFVTNHERMPFSKVKALCSEL-R-GTVAIPRNAEENKAIQEVAK-----TSAFLGITDEVTeg-QfmyvtggrltytnwkdepndhgsgedCVTIV-DNGLNDISQASHTAVCFEPA<br/> cplgwsFDQHCYKVFEPVKNWTEAEEIMQOHkgSRLSIHSSSEEFVSKLASKa1kfTSMWIGLNNPWKDGKWEWSDNARFDYKAWKR-RPY-----CTVMVkpdrIFWFRGCEKSVSFVCKELT-</p>                                       |
|      | lukmB<br>(124) |   |       |                                                                                                                                                                                                                                                                                                                                                                                                                                                                                                                                                                                                                                                                                                                                                                                                                                                                                                                                                                                                                                                                                                                                                                                                                                                                                                                                                                                                            |

|      |                                             |   |       |                                                                                                                                                                                                                                                                                                                                                                                                                                                                                                                                                                                                                                                                                                                                                                                                                                                                                                                                                                                                                                                                                                                                                                                                                                                                                                                                                                                                                                                                                                                                                                                                                                                                                                                                                                                                                                                                       |
|------|---------------------------------------------|---|-------|-----------------------------------------------------------------------------------------------------------------------------------------------------------------------------------------------------------------------------------------------------------------------------------------------------------------------------------------------------------------------------------------------------------------------------------------------------------------------------------------------------------------------------------------------------------------------------------------------------------------------------------------------------------------------------------------------------------------------------------------------------------------------------------------------------------------------------------------------------------------------------------------------------------------------------------------------------------------------------------------------------------------------------------------------------------------------------------------------------------------------------------------------------------------------------------------------------------------------------------------------------------------------------------------------------------------------------------------------------------------------------------------------------------------------------------------------------------------------------------------------------------------------------------------------------------------------------------------------------------------------------------------------------------------------------------------------------------------------------------------------------------------------------------------------------------------------------------------------------------------------|
| 1065 | <p>lyttA (115)</p> <hr/> <p>lukmA (131)</p> | M | 19.13 | <p><b>TM-align:</b> aliSize=93 (resi) RMSD=2.10 (Å)<br/> -----SGKKFFVTNH<sup>RMPFSKVKAL</sup>CSEL-R-<sup>GTVAIPRNAEENKATQEVAK</sup>-T-----SAFLGIT<sup>DEV</sup>-T--EGqfmyvtggrl<sup>tysnwkkdepnd</sup>-----HG--SGEDCVTIV-DN--GLWNDISQASHTAVCEFP<br/> dcpsdwtayDQHCYLAIGEPQNWYEAERFCTEQakd<sup>HLVSIQSREEGNFVAQLVSGFmhrseiYVWIGLRDRReEqqCN</sup>-----pewndgskiiyvnWke<sup>ESKMCQGLTKW</sup>InFHD<sup>WNNINCEDLYPFVCKFSA</sup></p> <p><b>SARST:</b> aliSize=107 (resi) RMSD=9.29 (Å)<br/> s-----GKKFFVTNH<sup>RMPFSKVKAL</sup>CSEL--R<sup>GTVAIPRNAEENKATQEV</sup>-----AKT---SAFLGIT<sup>DEVTEGO</sup>--FMYVT<sup>GRLT</sup><sup>SNWKKDepndhgSGED</sup>CVTIV--DNG-LWNDISQASHTAVCEFP-a<br/> -dcpsdwtayDQHCYLAIGEPQNWYEAERFCTEQakd<sup>HLVSIQSREEGNFVAQLVSGFmhrseiYVWIGLRDRREEQqCN</sup>PEWND<sup>SKI</sup>I<sup>VNWKEG</sup>-----ESKMCQGLTKW<sup>InFHD</sup>WNNINCEDLYPFVCKF<sup>Sa</sup>-</p> <p><b>BLAST:</b> aliSize=31 (resi) iden=16.52% (19/115) simi=26.96% (31/115)<br/> sgkkffvtnhermpfskvkalcse<sup>lrgtvaiprnae</sup>enkaiqevaktsa-----FLGIT<sup>DEVTEGO</sup>F--YVT<sup>GRLT</sup><sup>SNWKKDEPNHGS</sup>GEDCVTIV<sup>ngl</sup>WNDISQASHTAVCEFP<br/> -----dcpsdwtaydqhcylaigepqnwyeaerfcteqakdghlvsiqsreegnfvqlvsgf<sup>mhrseiYVWIGLRDRREEQqCN</sup>peWND<sup>SKI</sup>I<sup>VNWKEG</sup>ESKMCQGLTKW<sup>InFHD</sup>WNNINCEDLYPFVCKF<sup>SA</sup></p> <p><b>Proposed:</b> aliSize=107 (resi) RMSD=1.61 (Å)<br/> -----SGKKFFVTNH<sup>RMPFSKVKAL</sup>CSEL-R-<sup>GTVAIPRNAEENKATQEVAK</sup>-T-----SAFLGIT<sup>DEV</sup>--teGQF--MYVT<sup>GRLT</sup><sup>SNWKKDepndhgSGED</sup>CVTIVD-N--GLWNDISQASHTAVCEFP<br/> dcpsdwtayDQHCYLAIGEPQNWYEAERFCTEQakd<sup>HLVSIQSREEGNFVAQLVSGFmhrseiYVWIGLRDRReeq--QC</sup>PEWND<sup>SKI</sup>I<sup>VNWKEG</sup>-----ESKMCQGLTKW<sup>InFHD</sup>WNNINCEDLYPFVCKF<sup>SA</sup></p>                                             |
| 1066 | <p>lyttA (115)</p> <hr/> <p>lj34B (123)</p> | M | 17.39 | <p><b>TM-align:</b> aliSize=92 (resi) RMSD=2.06 (Å)<br/> -----SGKKFFVTNH<sup>RMPFSKVKAL</sup>CSEL-R-<sup>GTVAIPRNAEENKATQEVAK</sup>-----TSAFLGIT-<sup>DEVTEGO</sup>fmyvtggrl<sup>tysnwkkdepndh</sup>-----GSG-EDCVTIV-DNGLWNDISQASHTAVCEFP<br/> dcpsdws<sup>syEGHCYKPFSPKNWADAENFCTQQA</sup>g<sup>HLVSFQSSEADFVVKLA</sup>Fqtfgh<sup>SIFWMLSNVWQCN</sup>-----wqwsnaaml<sup>rykaWAEeSYCYFKs</sup>T<sup>NKWRSRACRMAQFVCEFOA</sup></p> <p><b>SARST:</b> aliSize=106 (resi) RMSD=9.74 (Å)<br/> s-----GKKFFVTNH<sup>RMPFSKVKAL</sup>CSEL--R<sup>GTVAIPRNAEENKATQEV</sup>-----KTSAFLGIT<sup>DEVTEGO</sup>FMYVT<sup>TGRLT</sup><sup>SNWKKdepndhgSGED</sup>CVTIVD<sup>NGL</sup>WNDISQASHTAVCEFP-a<br/> -dcpsdws<sup>syEGHCYKPFSPKNWADAENFCTQQA</sup>g<sup>HLVSFQSSEADFVVKLA</sup>fqtfgh<sup>SIFWMLSNVWQCNQOWSNAAMLRKAWAE</sup>-----ESYCVYFKST<sup>NKWRSRACRMAQFVCEFOA</sup></p> <p><b>BLAST:</b> aliSize=29 (resi) iden=13.91% (16/115) simi=25.22% (29/115)<br/> sgkkffvtnhermpfskvkalcse<sup>lrgtvaiprnae</sup>enk-----AI<sup>DEVAKTSAFLGITDEVTEGO</sup>FMYVT<sup>TGRLT</sup><sup>SNWKKDEPNHgs</sup>gedCVTIVD<sup>NGL</sup>WNDISQASHTAVCEFP<br/> -----dcpsdws<sup>syeghcykpfsepknwadaenfctqqhaghlvsfqsseadf</sup>vk<sup>lAFITFGHSIFWMLSNVWQCNQOWSNAAMLRKAWAEESY</sup>-----CVYFKST<sup>NKWRSRACRMAQFVCEFOA</sup></p> <p><b>Proposed:</b> aliSize=106 (resi) RMSD=1.74 (Å)<br/> -----SGKKFFVTNH<sup>RMPFSKVKAL</sup>CSEL-R-<sup>GTVAIPRNAEENKATQEVAK</sup>-----TSAFLGIT-<sup>DEVTEGO</sup>FMYVT<sup>TGRLT</sup><sup>SNWKKDepndhgsgED</sup>CVTIV-DNGLWNDISQASHTAVCEFP<br/> dcpsdws<sup>syEGHCYKPFSPKNWADAENFCTQQA</sup>g<sup>HLVSFQSSEADFVVKLA</sup>Fqtfgh<sup>SIFWMLSNVWQCNQOWSNAAMLRKAWAE</sup>-----SYCYFKST<sup>NKWRSRACRMAQFVCEFOA</sup></p>                                                                                                                                 |
| 1067 | <p>lyttA (115)</p> <hr/> <p>ljwiB (123)</p> | M | 15.65 | <p><b>TM-align:</b> aliSize=93 (resi) RMSD=2.36 (Å)<br/> -----SGKKFFVTNH<sup>RMPFSKVKAL</sup>CSEL-R-<sup>GTVAIPRNAEENKATQEVAK</sup>-----TSAFLGIT<sup>DEVTEGO</sup>fmyvtggrl<sup>tysnwkkdepndh</sup>-----GS-GEDCVTIV-DNGLWNDISQASHTAVCEFP<br/> gclpdwss<sup>YKHCYKVKVEKTWADA</sup>EKF<sup>CKELVngHLMSVNSREEGEFISKLA</sup>Lekmri<sup>VLVWIGLSHFWR</sup>ICP-----rwdgar<sup>ldyraLSdEPICFVAESFHNKIOWT</sup>NRK<sup>SFVCKYRV</sup></p> <p><b>SARST:</b> aliSize=104 (resi) RMSD=9.10 (Å)<br/> s-----GKKFFVTNH<sup>RMPFSKVKAL</sup>CSEL--R<sup>GTVAIPRNAEENKATQEV</sup>-----KTSAFLGIT-<sup>DEVTEGO</sup>fMYVT<sup>TGRLT</sup><sup>SNWKKDEPNHgs</sup>GEDCVTIVD<sup>NGL</sup>WNDISQASHTAVCEFP-a<br/> -gclpdwss<sup>YKHCYKVKVEKTWADA</sup>EKF<sup>CKELVngHLMSVNSREEGEFISKLA</sup>Lekmri<sup>VLVWIGLSHFWR</sup>ICP--LRWTDGAR<sup>LDYR</sup>---ALSDEP---ICFVAESFHNKIOWT<sup>NRKSFVCKYRV</sup></p> <p><b>BLAST:</b> aliSize=5 (resi) iden=3.48% (4/115) simi=4.35% (5/115)<br/> sg-----K<sup>KFFVTNH</sup>--erm<sup>pfskvkal</sup>sel<sup>rgtvaiprnae</sup>enkaiqevaktsa<sup>flgit</sup><sup>devtego</sup>fmyvtggrl<sup>tysnw</sup><br/> --gclpdwss<sup>YKHCYKVKVEKTWADA</sup>EKF<sup>CKELVngghlmsvnsreegefisklalekmriVLVWIGLSHFWR</sup>icpl<sup>rwdgar</sup><sup>ldyraLSdEPICFVAESFHNKIOWT</sup>NRK<sup>SFVCKYRV</sup>-----<br/> <sup>kkdepndhgsged</sup>cvt<sup>ivdnglwndiscqashtav</sup>ce<sup>fpa</sup></p> <p><b>Proposed:</b> aliSize=105 (resi) RMSD=2.05 (Å)<br/> -----SGKKFFVTNH<sup>RMPFSKVKAL</sup>CSEL-R-<sup>GTVAIPRNAEENKATQEVAK</sup>-----TSAFLGIT<sup>DEVTEGO</sup>-OFMYVT<sup>TGRLT</sup><sup>SNWKKDEPNHgs</sup>GEDCVTIV-DNGLWNDISQASHTAVCEFP<br/> gclpdwss<sup>YKHCYKVKVEKTWADA</sup>EKF<sup>CKELVngHLMSVNSREEGEFISKLA</sup>Lekmri<sup>VLVWIGLSHFWR</sup>icpl<sup>rwdgar</sup><sup>LDYR</sup>---ALSDEP---EPI<sup>CFVAESFHNKIOWT</sup>NRK<sup>SFVCKYRV</sup></p> |

|      |             |   |       |                                                                                                                                                                                                                                                                                                                                                                                                                                                                                                                                                                                                                                                                                                                                                                                                                                                                                                                                                                                                                                                                                                                                                                                                                                                                                                                                                                                             |
|------|-------------|---|-------|---------------------------------------------------------------------------------------------------------------------------------------------------------------------------------------------------------------------------------------------------------------------------------------------------------------------------------------------------------------------------------------------------------------------------------------------------------------------------------------------------------------------------------------------------------------------------------------------------------------------------------------------------------------------------------------------------------------------------------------------------------------------------------------------------------------------------------------------------------------------------------------------------------------------------------------------------------------------------------------------------------------------------------------------------------------------------------------------------------------------------------------------------------------------------------------------------------------------------------------------------------------------------------------------------------------------------------------------------------------------------------------------|
| 1068 | lyttA (115) | M | 16.52 | <p><b>TM-align:</b> aliSize=92 (resi) RMSD=2.19 (Å)<br/> -----SGKKFFVTNHERMPFSKVKALCSEL-R-GTVAIPRNAEENKAIQEVAK--T---SAFLGIT-DEVTEGdfmyvtggrltySNWkkdepndh-----GSGEDCVTIV-DNGLNDISQASHTAVCEPFA<br/> gfcclpgwssYDEHCYQVFOOKNWNEDAERFCTQqhgSHLVSFHSSEVDFVVSKTSpilkhDFVWMLShVWNECA-----kewsdgTKldykawSGQSDCITSKtTDNQLSMDCSSKRYVVKCFQA</p> <p><b>SARST:</b> aliSize=103 (resi) RMSD=9.54 (Å)<br/> sg-----KFFVTNHERMPFSKVKALCSEL--RGTVAIPRNAEENKAIQEVAK----KTSAFLLGITDEVTEGQFMVYVTLGRLTYSNWKkdepndhgSGEDCVTIV-DNGLNDISQASHTAVCEP-a<br/> --gfcclpgwssydehcyqvfooknwnedaerfctqohrghlvsfhsseevdfvvsktspilkhdfvwmclsnvwnecaekewsdTKldykaw-----SGQSDCITSKTTDnqLSDCSSKRYVVKCFQa-</p> <p><b>BLAST:</b> aliSize=48 (resi) iden=25.22% (29/115) simi=41.74% (48/115)<br/> sgkfffvtnh-----ERMPFSKVKALCSEL-RGTVAIPRNAEENKAIQEVAKVAKTSAFLLGITDEVTEGdfMYVTGGRLTYSNWKKDEPNHD--GSGE-DCVTI--IVDNGLNDISQASHTAVCEPFA<br/> -----gfcclpgwssydehcyqvfooknwnedaerfctqohrghlvsfhsseevdfv--SKTSPILK-HDFVWMLSNVWNECA--KESDGTGLDYkaWSGQSDCITSKTTDNQLSMDCSSKRYVVKCFQA</p> <p><b>Proposed:</b> aliSize=106 (resi) RMSD=1.72 (Å)<br/> -----SGKKFFVTNHERMPFSKVKALCSEL-R-GTVAIPRNAEENKAIQEVAK----TSAFLGIT-DEVTEGdfMYVTGRLTYSNWKkdepndhgSGEDCVTIV-DNGLNDISQASHTAVCEPFA<br/> gfcclpgwssYDEHCYQVFOOKNWNEDAERFCTQqhgSHLVSFHSSEVDFVVSKTSpilkhDFVWMLShVWNECA--KESDGTGLDYkaWSGQSDCITSKTTDNQLSMDCSSKRYVVKCFQA</p>                        |
| 1069 | lyttA (115) | M | 12.17 | <p><b>TM-align:</b> aliSize=91 (resi) RMSD=2.19 (Å)<br/> -----SGKKFFVTNHERMPFSKVKALCSEL-R-GTVAIPRNAEENKAIQEVAK--T---SAFLGITDEVTEGdfmyvtggrltySNWkkdepndh-----GSGEDCVTIV--DN-GLNDISQASHTAVCEPFA<br/> dcssgwsYEGHCYKVFQSKTWADAESFCTKQvngHLVSISSGADFVGQLIAqkIksakiHVVWIGLRAQNKekQCS-----iewsdgssisyenwiEESKCLGVHiETGFhKVENFYEQQDPFVCHA--</p> <p><b>SARST:</b> aliSize=104 (resi) RMSD=9.93 (Å)<br/> s-----GKKFFVTNHERMPFSKVKALCSEL--RGTVAIPRNAEENKAIQEVAK----TSAFLGITDEVTEGdfMYVTGRLTYSNWKkdepndhgSGEDCVTIV--DNG-LNDISQASHTAVCE-fpa<br/> -dcssgwsyEGHCYKVFQSKTWADAESFCTKQvngHLVSISSGADFVGQLIAqkIksakiHVVWIGLRAQNKekQCS--EWSDSISISENWIIEE-----ESKCLGVHiETGFhKVENFYEQQDPFVCHA---</p> <p><b>BLAST:</b> aliSize=33 (resi) iden=14.78% (17/115) simi=28.70% (33/115)<br/> sgkfffvtnhermpfskvkalcseLrgtvaiprnaeenkaIQEVAK-----AKTSAFLGITDEVTEGQ--FMVYVTLGRLTYSNWKkDEPNdhGSGEDCVTIV--VDNGL--NDISQASHTAVCE-fpa<br/> -----dcssgwsyEGHCYKVFQSKTWADAESFCTKQvngHLVSISSGADFVGQLIAqkIksakiHVVWIGLRAQNKekQCSIEWSDSISISENWIIEE-----SKKCLGVHiETGFhKVENFYEQQDPFVCHA---</p> <p><b>Proposed:</b> aliSize=106 (resi) RMSD=1.69 (Å)<br/> -----SGKKFFVTNHERMPFSKVKALCSEL-R-GTVAIPRNAEENKAIQEVAK--T---SAFLGITDEVTEGdfMYVTGRLTYSNWKkdepndhgSGEDCVTIV--DN-GLNDISQASHTAVCEPFA<br/> dcssgwsYEGHCYKVFQSKTWADAESFCTKQvngHLVSISSGADFVGQLIAqkIksakiHVVWIGLRAQNKekQCSIEWSDSISISENWIIEE-----ESKCLGVHiETGFhKVENFYEQQDPFVCHA--</p> |
| 1070 | lyttA (115) | M | 14.78 | <p><b>TM-align:</b> aliSize=92 (resi) RMSD=2.00 (Å)<br/> -----SGKKFFVTNHERMPFSKVKALCSEL-R-GTVAIPRNAEENKAIQEVAK----TSAFLGITDEVTEGdfmyvtggrltySNWkkdepndh-----GSGEDCVTIV--DN-GLNDISQASHTAVCEPFA<br/> hcpsdwyYDQHCYRIFNEENWNEDAERFCTQqkGHLVSIKSAKEADFVAVMVTqnieesfSHVSIQLRVQNKekqCS-----tkwsdgsvsydnIIdLYITKLSLLKkeTGfRkWFVASCIGKIPFVCKFPqC</p> <p><b>SARST:</b> aliSize=98 (resi) RMSD=9.76 (Å)<br/> sg-----KFFVTNHERMPFSKVKALCSEL--RGTVAIPRNAEENKAIQEVAK--KTS-----AFLGITDEVTE--GQFMVYVTLGRLTYSNWKkdepndhgSGEDCVTIV-DNGLNDISQASHTAVCEPFA<br/> --hcpsdwyYDQHCYRIFNEENWNEDAERFCTQqkGHLVSIKSAKEADFVAVMVTqnieesfshvsiqlrvqnkeqCSTKWSDSVSDNLLD-----LYITK-----SllkktgfrkwFVASCIGKIPFVCKFPqC</p> <p><b>BLAST:</b> aliSize=8 (resi) iden=6.09% (7/115) simi=6.96% (8/115)<br/> sgkfffvtnhermpfskvkalcseLrgtvaiprnaeenkaIQEVAKtsaflgitdevteGdfmyvtggrltySNWkkdepndhgSGEDCVTIV-DNGLNDISQASHTAVCEPFA<br/> -----hcpsdwyYDQHCYRIFNEENWNEDAERFCTQqkGHLVSIKSAKEADFVAVMVTqnieesfshvsiqlrvqnkeqCSTKWSDSVSDNLLD-----LYITKLSLLKkeTGfRkWFVASCIGKIPFVCKFPqC</p> <p><b>Proposed:</b> aliSize=108 (resi) RMSD=1.80 (Å)<br/> -----SGKKFFVTNHERMPFSKVKALCSEL-R-GTVAIPRNAEENKAIQEVAK----TSAFLGITDEVTEGdfMYVTGRLTYSNWKkdepndhgSGEDCVTIV--DN-GLNDISQASHTAVCEPFA<br/> hcpsdwyYDQHCYRIFNEENWNEDAERFCTQqkGHLVSIKSAKEADFVAVMVTqnieesfshvsiqlrvqnkeqCSTKWSDSVSDNLLD-----LYITKLSLLKkeTGfRkWFVASCIGKIPFVCKFPqC</p>               |

|      |                                                     |   |       |                                                                                                                                                                                                                                                                                                                                                                                                                                                                                                                                                                                                                                                                                                                                                                                                                                                                                                                                                                                                                                                                                                                                                                                                                                                                                                                                                                                                             |
|------|-----------------------------------------------------|---|-------|-------------------------------------------------------------------------------------------------------------------------------------------------------------------------------------------------------------------------------------------------------------------------------------------------------------------------------------------------------------------------------------------------------------------------------------------------------------------------------------------------------------------------------------------------------------------------------------------------------------------------------------------------------------------------------------------------------------------------------------------------------------------------------------------------------------------------------------------------------------------------------------------------------------------------------------------------------------------------------------------------------------------------------------------------------------------------------------------------------------------------------------------------------------------------------------------------------------------------------------------------------------------------------------------------------------------------------------------------------------------------------------------------------------|
| 1071 | <p>lyttA<br/>(115)</p> <hr/> <p>lj34A<br/>(129)</p> | M | 14.78 | <p><b>TM-align:</b> aliSize=91 (resi) RMSD=2.10 (Å)<br/> -----SGKKFFVTNHERMPFSKVKALCSEL-R-RTVAIPRNAEENKATQEVAK--T----SAFLGITDEV-T-EGqfmyvtggrltySNWkdepnd-----HGSGEDCVITVD--N-GLINDISQASHTAVCFpa<br/> dcpsgwssYEGHCYKPFKLYKTWDDAERFCTEQakGHLVSIESAAGEADFVAQLVTenIqntksYVWIGLRVQKkEQC-----ssewsdgssvsyenwiEAESKTLGLEKetGFRKVVNIYGOQNPFCa--</p> <p><b>SARST:</b> aliSize=103 (resi) RMSD=9.85 (Å)<br/> s-----GKKFFVTNHERMPFSKVKALCSEL--R-RTVAIPRNAEENKATQEVA-----TSAFLLGITDevTEGQ---FMYVTGRLTYSNWKDepndhgSGEDCVITV---DNGLINDISQASHTAVCF-fpa<br/> -dcpsgwssyEGHCYKPFKLYKTWDDAERFCTEQakGHLVSIESAAGEADFVAQLVteniqntSYVWIGLRV--QGKEkcsSEWSDSSSVSYENWIEA-----ESKTLGLEKetGFRKVVNIYGOQNPFCa---</p> <p><b>BLAST:</b> aliSize=36 (resi) iden=18.26% (21/115) simi=31.30% (36/115)<br/> sgkkffvtnhermpfskvkalcseirgtvaiprnae-----ENKATQEVAKTSAFLLGITDEVTEGQFM--YVTGRLTYSNWKDEpndhgSGEDCVITV--VDNCL--INDISQASHTAVCF-fpa<br/> -----dcpsgwssyeghcykpfklyktwddaerfcteqakghlvsiesageadfvaqlvtEN--IQN-TKSYVWIGLRVQKKEQCSSEWSDSSSVSYENWIEAE-----SKTLGLEKETGFRKVVNIYGOQNPFCa---</p> <p><b>Proposed:</b> aliSize=105 (resi) RMSD=1.59 (Å)<br/> -----SGKKFFVTNHERMPFSKVKALCSEL-R-RTVAIPRNAEENKATQEVAK--T----SAFLGITDEV---teGQfMYVTGRLTYSNWKDepndhgSGEDCVITVD--N-GLINDISQASHTAVCFpa<br/> dcpsgwssYEGHCYKPFKLYKTWDDAERFCTEQakGHLVSIESAAGEADFVAQLVTenIqntksYVWIGLRVQKkEQ--CSSEWSDSSSVSYENWIEA-----ESKTLGLEKetGFRKVVNIYGOQNPFCa--</p> |
| 1072 | <p>2cw1A<br/>(65)</p> <hr/> <p>1d11A<br/>(61)</p>   | C | 19.67 | <p><b>TM-align:</b> aliSize=53 (resi) RMSD=2.30 (Å)<br/> mr---KKLDLKKFVEDKNOEYAARALGLSOKLIEEVLKRRLPVYVETKDCNKKVYITQdgi tqpfp-----<br/> --meqRIT-LDYAMRFGTGTAKDLGVYSAIANKAIHARRKIFLTIADGSVYAEVVK-----pwpns</p> <p><b>SARST:</b> aliSize=54 (resi) RMSD=2.51 (Å)<br/> mr---KKLDLKKFVEDKNOEYAARALGLSOKLIEEVLKRRLPVYVETKDCNKKVYITQ-----dgi tqpfp<br/> --meQRITLDYAMRFGTGTAKDLGVYSAIANKAIHARRKIFLTIADGSVYAEVVKpwpns-----</p> <p><b>BLAST:</b> aliSize=32 (resi) iden=27.87% (17/61) simi=52.46% (32/61)<br/> RRKLDLKKFVEDKNOEYAARALGLSOKLIEEVLKRRLPVYVETKDCNKKVYITQdgiTQPF--p<br/> MEQRITLDYAMRFGTGTAKDLGVYSAIANKAIHARRKIFLTIADGS--VYAE--VKPWPsn-</p> <p><b>Proposed:</b> aliSize=58 (resi) RMSD=2.11 (Å)<br/> mr---KKLDLKKFVEDKNOEYAARALGLSOKLIEEVLKRRLPVYVETKDCNKKVYITQdgiTQPFPP<br/> --meqRIT-LDYAMRFGTGTAKDLGVYSAIANKAIHARRKIFLTIADGSVYAEVVK-----VKPWPNS</p>                                                                                                                                                                                                                                                                                                                                                                                                                                                                                                                                                 |
| 1073 | <p>2cw1A<br/>(65)</p> <hr/> <p>2ecsA<br/>(60)</p>   | C | 20.00 | <p><b>TM-align:</b> aliSize=54 (resi) RMSD=2.38 (Å)<br/> mr---KKLDLKKFVEDKNOEYAARALGLSOKLIEEVLKRRLPVYVETKDCNKKVYITQdgi tqpfp--<br/> --meqRIT-LDYAMRFGTGTAKDLGVYSSINQAIHARRKIFLTIADGSVYAEVVK-PF-----ps</p> <p><b>SARST:</b> aliSize=55 (resi) RMSD=2.86 (Å)<br/> m-RKLDLKKFVEDKNOEYAARALGLSOKLIEEVLKRRLPVYVETKDCNKKVYITQ---dgi tqpfp<br/> -mEQRITLDYAMRFGTGTAKDLGVYSSINQAIHARRKIFLTIADGSVYAEVVKpfp-----</p> <p><b>BLAST:</b> aliSize=31 (resi) iden=28.33% (17/60) simi=51.67% (31/60)<br/> RRKLDLKKFVEDKNOEYAARALGLSOKLIEEVLKRRLPVYVETKDCNKKVYITQdgiTQPF--p<br/> MEQRITLDYAMRFGTGTAKDLGVYSSINQAIHARRKIFLTIADGS--VYAE--VKPFPs-</p> <p><b>Proposed:</b> aliSize=57 (resi) RMSD=2.14 (Å)<br/> mr---KKLDLKKFVEDKNOEYAARALGLSOKLIEEVLKRRLPVYVETKDCNKKVYITQdgiTQFPF<br/> --meqRIT-LDYAMRFGTGTAKDLGVYSSINQAIHARRKIFLTIADGSVYAEVVK---PFPS--</p>                                                                                                                                                                                                                                                                                                                                                                                                                                                                                                                                                                     |



|      |                                             |   |       |                                                                                                                                                                                                                                                                                                                                                                                                                                                                                                                                                                                                                                                                                                                                                                                                                                                                                           |
|------|---------------------------------------------|---|-------|-------------------------------------------------------------------------------------------------------------------------------------------------------------------------------------------------------------------------------------------------------------------------------------------------------------------------------------------------------------------------------------------------------------------------------------------------------------------------------------------------------------------------------------------------------------------------------------------------------------------------------------------------------------------------------------------------------------------------------------------------------------------------------------------------------------------------------------------------------------------------------------------|
| 1077 | <p>lgcpA<br/>(65)</p> <p>li07A<br/>(59)</p> | N | 18.64 | <p><b>TM-align:</b> aliSize=34 (resi) RMSD=2.60 (Å)<br/> --KMEVFQEEYGIpPppgafGPFRLNPGIIVELTK-AEaehNwegrntatnevg-----Wfpcnrvhpyvh-----<br/> kkYAKSKYDFVAR-N-----SSEL SVMKD VLEI LDdRR--QW-----kvrnasgdsGF-----vpnnildimrtp</p> <p><b>SARST:</b> aliSize=54 (resi) RMSD=14.34 (Å)<br/> k---MEVFQEEYgippPGAFGPFRLNPGIIVELTKaEAEHNWEGRNTATNEVCWFPCNRVHPYV--h<br/> -kkyAKSKYDF-----VARNSSSEL SVMKD VLEI ---LDDRROWKVRNASGDSGFVNNILDIRtp-</p> <p><b>BLAST:</b> aliSize=18 (resi) iden=16.95% (10/59) simi=30.51% (18/59)<br/> kmevfqeyyigpppgafgpfrlnpg-----IIVELTKaEAEHNWEGRNTATNEVCWFPC-----rvhpyvh<br/> -----kkyakskydfvarnsseisvmkdVLEI-LDDRROWKVRN-ASGDSGFVNNIldimrtp-----</p> <p><b>Proposed:</b> aliSize=54 (resi) RMSD=1.46 (Å)<br/> --KMEVFQEEYGIpP-ppgafgPFRLNPGIIVELTK-AEaehNwegrntatnevcwfpcnrvhpyvh-<br/> kkYAKSKYDFVAR-Ns-----SEL SVMKD VLEI LDdRR--QWVKVRN-ASGDSGFVNNILDIRtp</p> |
| 1078 | <p>lckaA<br/>(57)</p> <p>li07A<br/>(59)</p> | C | 26.32 | <p><b>TM-align:</b> aliSize=36 (resi) RMSD=2.39 (Å)<br/> AEYVRALFDENGDEEDLPFKNGDILRTRD-KPEeQWwnaedsegkr-----Mipvpyveky-----<br/> KKYAKSKYDFVARNSSSEL SVMKD VLEI LDdRRQW-WK-----vrnasgdsGF-----vpnnildimrtp</p> <p><b>SARST:</b> aliSize=53 (resi) RMSD=11.24 (Å)<br/> a-EYVRALFDENGDEEDLPFKNGDILRTRDKPEeQWNAEDSEKRGMIIPVYVE-----k<br/> -kkyAKSKYDFVARNSSSEL SVMKD VLEI LDdRR-QWVKVRNASGDSGFVNNILDIRtp-</p> <p><b>BLAST:</b> aliSize=25 (resi) iden=26.79% (15/57) simi=44.64% (25/57)<br/> a-EYVRALFDENGDEEDLPFKNGDILRTRDKPEeQWNAEDSEKRGMIIP-----vpyvek<br/> -kkyAKSKYDFVARNSSSEL SVMKD VLEI LDD-RRQWVKVRNASGDSGFVNNIldimrtp-----</p> <p><b>Proposed:</b> aliSize=53 (resi) RMSD=0.82 (Å)<br/> AEYVRALFDENGDEEDLPFKNGDILRTRD--kpeeQWNAEDSEKRGMIIPVYVEKY---<br/> KKYAKSKYDFVARNSSSEL SVMKD VLEI LDdrr---QWVKVRNASGDSGFVNNILDIRtp</p>                                                       |
| 1079 | <p>lm3aA<br/>(57)</p> <p>li07A<br/>(59)</p> | C | 26.32 | <p><b>TM-align:</b> aliSize=34 (resi) RMSD=2.36 (Å)<br/> -CYVRALFDENGDEEDLPFKNGDILRTRD-KPEeQWwnaedsegkrgmipvpyvekyg-----<br/> kkYAKSKYDFVARNSSSEL SVMKD VLEI LDdRRQW-----kvrnasgdsGFvpnnildimrtp</p> <p><b>SARST:</b> aliSize=50 (resi) RMSD=11.67 (Å)<br/> c--YVRALFDENGDEEDLPFKNGDILRTRDKPEeQ--WNAEDSEKRGMIIPVYVEK----yg<br/> -kkyAKSKYDFVARNSSSEL SVMKD VLEI ---LDDRrQWVKVRNASGDSGFVNNILDIRtp--</p> <p><b>BLAST:</b> aliSize=24 (resi) iden=26.32% (15/57) simi=42.11% (24/57)<br/> c--YVRALFDENGDEEDLPFKNGDILRTRDKPEeQWNAEDSEKRGMIIP-----vpyvekyg<br/> -kkyAKSKYDFVARNSSSEL SVMKD VLEI LDD-RRQWVKVRNASGDSGFVNNIldimrtp-----</p> <p><b>Proposed:</b> aliSize=53 (resi) RMSD=1.59 (Å)<br/> -CYVRALFDENGDEEDLPFKNGDILRTRD--kpeeQWNAEDSEKRGMIIPVYVEKYG--<br/> kkYAKSKYDFVARNSSSEL SVMKD VLEI LDdrr---QWVKVRNASGDSGFVNNILDIRtp</p>                                                         |



|      |               |   |       |                                                                                                                                                                                                                                                                                                                                                                                                                                                                                                                                                                                                                                                                                                                                                                                                                                                        |
|------|---------------|---|-------|--------------------------------------------------------------------------------------------------------------------------------------------------------------------------------------------------------------------------------------------------------------------------------------------------------------------------------------------------------------------------------------------------------------------------------------------------------------------------------------------------------------------------------------------------------------------------------------------------------------------------------------------------------------------------------------------------------------------------------------------------------------------------------------------------------------------------------------------------------|
| 1080 | IzuyA<br>(58) | C | 24.14 | <p><b>TM-align:</b> aliSize=35 (resi) RMSD=2.28 (Å)<br/> -PMFEAAYDFPGSgSPSELPLKKGDIYITR-EEPSGwslgklldgskeg-----Wvptaymkph-----<br/> kKYAKSKYDFVAR-NSSEL SVMKDDVLEI LDDRQWVK-----v rnasgdsgF-----vpnnildimrtp</p> <p><b>SARST:</b> aliSize=50 (resi) RMSD=12.25 (Å)<br/> pm---FEAAYDFPGSgSPSELPLKKGDIYITreEPSG--SLGKLLDskKEWVPTAYMKP----h<br/> --kkyAKSKYDFVAR-NSSEL SVMKDDVLEI---LDDRrqWVKVRNASG-DSGFVNNILDIrtp-</p> <p><b>BLAST:</b> aliSize=24 (resi) iden=27.59% (16/58) simi=41.38% (24/58)<br/> pmf----EAAAYDFPGSGSpSELPLKKGDIYITREEPSGSLgKLLDskKEWV-----taymkph<br/> ---kkyAKSKYDFVARNS-SEL SVMKDDVLEI LDDRQWVKV-RNASGD-SCGFVNNildimrtp-----</p> <p><b>Proposed:</b> aliSize=54 (resi) RMSD=1.53 (Å)<br/> -PMFEAAYDFPGSgSPSELPLKKGDIYITR-eePSGSLGKLLDGSKEWVPTAYMKPH---<br/> kKYAKSKYDFVAR-NSSEL SVMKDDVLEI LDD--RRQWVKVRN-ASGDSGFVNNILDIMRtp</p> |
| 1081 | Ibu1C<br>(56) | C | 26.79 | <p><b>TM-align:</b> aliSize=35 (resi) RMSD=2.06 (Å)<br/> -IIVVALYDYEIHHEDLSFQKGMVLE-ESGEWkarslatrkeg-----Yipsnyvarv-----<br/> kKYAKSKYDFVARNSSEL SVMKDDVLEI LDDRQWVK-----kvrnasgdsgF-----vpnnildimrtp</p> <p><b>SARST:</b> aliSize=53 (resi) RMSD=11.51 (Å)<br/> i--IIVVALYDYEIHHEDLSFQKGMVLEESGEWKAARS1ATRKEGYIPSNYVAR----v<br/> -kkyAKSKYDFVARNSSEL SVMKDDVLEI LDDRQWVKVRN-ASGDSGFVNNILDIrtp-</p> <p><b>BLAST:</b> aliSize=29 (resi) iden=28.57% (16/56) simi=51.79% (29/56)<br/> iivval-----YDYEIHHEDLSFQKGMVLEESGEWKAARS1ATRKEGYIPSN-----yvarv<br/> -----kkyakskyDFVARNSSEL SVMKDDVLEI LDDRQWVKVRN-ASGDSGFVNNildimrtp-----</p> <p><b>Proposed:</b> aliSize=52 (resi) RMSD=0.72 (Å)<br/> -IIVVALYDYEIHHEDLSFQKGMVLE--esGEWKAARSLaTRKEGYIPSNYVARV---<br/> kKYAKSKYDFVARNSSEL SVMKDDVLEI LDDR--QWVKVRNA-SGDSGFVNNILDIMRtp</p>                         |
| 1082 | IavzC<br>(57) | C | 28.07 | <p><b>TM-align:</b> aliSize=36 (resi) RMSD=2.29 (Å)<br/> -TLFVALYDYEARTEDDLSFHGKGFQLN-SSEGDWears1ttgetg-----Yipsnyvapv-----<br/> kKYAKSKYDFVARNSSEL SVMKDDVLEI LDDRQWVK-----v rnasgdsgF-----vpnnildimrtp</p> <p><b>SARST:</b> aliSize=53 (resi) RMSD=11.64 (Å)<br/> t--LFVALYDYEARTEDDLSFHGKGFQLNSEGDWEARS1TTGETGYIPSNYVAP----v<br/> -kkyAKSKYDFVARNSSEL SVMKDDVLEI LD-DRRQWVKVRNAS-GDSGFVNNILDIrtp-</p> <p><b>BLAST:</b> aliSize=29 (resi) iden=28.07% (16/57) simi=50.88% (29/57)<br/> tlfval-----YDYEARTEDDLSFHGKGFQLNSEGDWEARS1TTGETGYIPSN-----yvapv<br/> -----kkyakskyDFVARNSSEL SVMKDDVLEI LDDR--QWVKVRN-ASGDSGFVNNildimrtp-----</p> <p><b>Proposed:</b> aliSize=53 (resi) RMSD=1.13 (Å)<br/> -TLFVALYDYEARTEDDLSFHGKGFQLN--sseGDWEARS1TTGETGYIPSNYVAPV---<br/> kKYAKSKYDFVARNSSEL SVMKDDVLEI LDDR--RQWVKVRN-ASGDSGFVNNILDIMRtp</p>              |
|      | li07A<br>(59) |   |       |                                                                                                                                                                                                                                                                                                                                                                                                                                                                                                                                                                                                                                                                                                                                                                                                                                                        |

|      |                                               |   |       |                                                                                                                                                                                                                                                                                                                                                                                                                                                                                                                                                                                                                                                                                                                                                                                                                                                                                                                                                                                                                                                                                                                                                                                                                                                                                                                                                                                                                                                                                                                                                                                                                                                                                                                                                                                                                                                                                                                                                                                                                                                                                                        |
|------|-----------------------------------------------|---|-------|--------------------------------------------------------------------------------------------------------------------------------------------------------------------------------------------------------------------------------------------------------------------------------------------------------------------------------------------------------------------------------------------------------------------------------------------------------------------------------------------------------------------------------------------------------------------------------------------------------------------------------------------------------------------------------------------------------------------------------------------------------------------------------------------------------------------------------------------------------------------------------------------------------------------------------------------------------------------------------------------------------------------------------------------------------------------------------------------------------------------------------------------------------------------------------------------------------------------------------------------------------------------------------------------------------------------------------------------------------------------------------------------------------------------------------------------------------------------------------------------------------------------------------------------------------------------------------------------------------------------------------------------------------------------------------------------------------------------------------------------------------------------------------------------------------------------------------------------------------------------------------------------------------------------------------------------------------------------------------------------------------------------------------------------------------------------------------------------------------|
| 1083 | <p>2ebpA<br/>(73)</p> <p>li07A<br/>(59)</p>   | C | 16.95 | <p><b>TM-align:</b> aliSize=35 (resi) RMSD=1.80 (Å)<br/> gssgssgFcGR<del>RVHTDFTP</del>SpYDTDSLKLKGGIIDI<del>IS-KPpmGT</del>wmgllnnkvg-----Tfkiyvdlssgpssg-----<br/> -----K-KY<del>KSKYDFVAR</del>--NSSEL<del>SVMKDDVLE</del>LDdRR--QW-----wkvrnasgdsGF-----vpnnildimrtp</p> <p><b>SARST:</b> aliSize=55 (resi) RMSD=12.07 (Å)<br/> gssgssgfcg--RARVHTDFTPspYDTDSLKLKGGIIDI<del>ISKPPMGT</del>WMGLLNKVT<del>TFKFIYVDVLS</del>--sgpssg<br/> -----kkY<del>KSKYDFVA</del>--RNSSEL<del>SVMKDDVLE</del>LDDRRQW<del>WRNASGDS</del>FVFNIL<del>DIMRTP</del>-----</p> <p><b>BLAST:</b> aliSize=9 (resi) iden=11.86% (7/59) simi=15.25% (9/59)<br/> g-----SSGSSGFCGRARVHTDFTPspYDTDSLKLKGGIIDI<del>ISKPPMGT</del>wmgllnnkvgTfkiyvdlssgpssg<br/> -kkyakskydfvarnselsvmkddvlei<del>lddrrqw</del>wkvrnasgdsGFVFNIL<del>DIMRTP</del>-----</p> <p><b>Proposed:</b> aliSize=55 (resi) RMSD=1.55 (Å)<br/> gssgssgFcGR<del>RVHTDFTP</del>SpYDTDSLKLKGGIIDI<del>IS--kppmGT</del>WMGLLNKVT<del>TFKFIYVDVLS</del>sgpsSg<br/> -----K-KY<del>KSKYDFVAR</del>--NSSEL<del>SVMKDDVLE</del>LDdrr--QW<del>KVRNASGDS</del>FVFNIL<del>DIMRT</del>---P-</p>                                                                                                                                                                                                                                                                                                                                                                                                                                                                                                                                                                                                                                                                                                                                                                                                                                                                                                                                                                           |
| 1084 | <p>2eyxA<br/>(67)</p> <p>li07A<br/>(59)</p>   | N | 13.56 | <p><b>TM-align:</b> aliSize=36 (resi) RMSD=2.41 (Å)<br/> nlqngPI<del>YARVIQKR</del>PNayDKTALALEVGELVKV<del>TK-I-NVsgQ</del>wegecngkrg-----Hfpfthvrlldqgn-----<br/> -----KKY<del>KSKYDFVAR</del>--NSSEL<del>SVMKDDVLE</del>LDdRrQW--K-----vrnasgdsGF-----vpnnildimrtp</p> <p><b>SARST:</b> aliSize=43 (resi) RMSD=10.12 (Å)<br/> nlqngp-I<del>YARVIQKR</del>PNayDKTALALEVGELVKV<del>tkinvsgQ</del>wegecng-----KR<del>HF</del>FTHVRL<del>L</del>---dqgn<br/> -----kkY<del>KSKYDFVA</del>--RNSSEL<del>SVMKDDVLE</del>-----LDDrrqw<del>wkvrnasgDS</del>FVFNIL<del>DIMRTP</del>----</p> <p><b>BLAST:</b> aliSize=5 (resi) iden=8.47% (5/59) simi=8.47% (5/59)<br/> nlqngpiyarviqkrvpnaydktalalevgelv-----<del>TKINVSG</del>-----qwegecngkrghfpfthvrlldqgn<br/> -----kkyakskydfvarnselsvmkddvlei<del>lddrrqw</del>wkvr--NASGdsGFvpnnildimrtp-----</p> <p><b>Proposed:</b> aliSize=57 (resi) RMSD=1.54 (Å)<br/> nlqngPI<del>YARVIQKR</del>PNayDKTALALEVGELVKV<del>TK-INVsgQ</del>wegecng--KR<del>HF</del>FTHVRL<del>L</del>DQgn<br/> -----KKY<del>KSKYDFVAR</del>--NSSEL<del>SVMKDDVLE</del>LDdRRQ--W<del>KVRNASGDS</del>FVFNIL<del>DIMRTP</del>-----</p>                                                                                                                                                                                                                                                                                                                                                                                                                                                                                                                                                                                                                                                                                                                                                                                                                                                                                                                                                     |
| 1085 | <p>2vq9A<br/>(123)</p> <p>lh8xA<br/>(125)</p> | N | 30.89 | <p><b>TM-align:</b> aliSize=97 (resi) RMSD=1.92 (Å)<br/> irrryehflqhvyygi-----TE--Q-TCDRVMRQRRI<del>r</del>fpTGNDC<del>KEVNTFIQANGNH</del>RTVCTGgGTRO<del>Q</del>D---NRDLYMSNDQFTVITIT<del>IR</del>--SGERhp<del>NCR</del>RGKSSRK<del>I</del>VVACEG--EW<del>FAHYERG</del>Iv<br/> -----kesaaakferqhmdsgns<del>PSsssTYCNQMMRRRNMT</del>-----QGRCK<del>PNVTFVHEPLVD</del>QNVCFQEKV<del>TCKNGGNCYKSNSSMHITD</del>CR<del>TNGSRYP</del>--NCA<del>VRTSOKERH</del>I<del>V</del>ACEGspYV<del>V</del>HDAS<del>E</del>-</p> <p><b>SARST:</b> aliSize=113 (resi) RMSD=13.05 (Å)<br/> irr---RYEH<del>L</del>TOHVYGGITE---Q-TCDRVMRQRRI<del>r</del>fpTGNDC<del>KEVNTFIQANGNH</del>RTVCTGGG<del>TRQTDNRDL</del>MSNDQFTVITIT<del>IR</del>SGERHP<del>NCR</del>RGKSSRK<del>I</del>VVACEG--EW<del>FAHYERG</del>--viv<br/> ---kesAAAK<del>F</del>ERQHMDSCNSPSSsstYCNQMMRRRNMT---M<del>QGRCK</del>PNVTFVHEPLVD<del>QNVCFQEKV</del>TCKNGGNCYKSNSSMHITD<del>CR</del>TNGSRYP<del>NCA</del>VRTSOKERH<del>I</del>VACEGspYV<del>V</del>HDASve---</p> <p><b>BLAST:</b> aliSize=62 (resi) iden=34.15% (42/123) simi=50.41% (62/123)<br/> irrryeh-----L<del>T</del>OHVYGGITE<del>Q</del>---CDRVMRQRRI<del>r</del>fpTGNDC<del>KEVNTFIQANGNH</del>RTVCTGGG--RQTDNRDLMSNDQFTVITIT<del>IR</del>SGERHP<del>NCR</del>RGKSSRK<del>I</del>VVACEG--EW<del>FAHYERG</del>--iv<br/> -----kesaaak<del>F</del>ERQHMDSCNSPSSsstYCNQMMRRRNMTQ---GR<del>CK</del>PNVTFVHEPLVD<del>QNVCFQEKV</del>TCKNGGNCYKSNSSMHITD<del>CR</del>TNGSRYP<del>NCA</del>VRTSOKERH<del>I</del>VACEGspYV<del>V</del>HDAS<del>E</del>---</p> <p><b>Proposed:</b> aliSize=112 (resi) RMSD=1.66 (Å)<br/> i-RRRYEH<del>L</del>TOHVYGGITE---Q-TCDRVMRQRRI<del>r</del>fpTGNDC<del>KEVNTFIQANGNH</del>RTVCTGgGTRO<del>Q</del>DN---RDLYMSNDQFTVITIT<del>IR</del>--SGERhp<del>NCR</del>RGKSSRK<del>I</del>VVACEG--EW<del>FAHYERG</del>Iv<br/> -kESAAAK<del>F</del>ERQHMDSCNSPSSsstYCNQMMRRRNMT---QGR<del>CK</del>PNVTFVHEPLVD<del>QNVCFQEKV</del>TCKngq<del>NCYKSNSSMHITD</del>CR<del>TNGSRYP</del>--NCA<del>VRTSOKERH</del>I<del>V</del>ACEGspYV<del>V</del>HDAS<del>E</del>---</p> |

|      |                                               |            |                                                                                                                                                                                                                                                                                                                                                                                                                                                                                                                                                                                                                                                                                                                                                                                                                                                                                                                                                                                                                                                                                                                                                                                                                                                                                                                                                                                                                                                                                                                   |
|------|-----------------------------------------------|------------|-------------------------------------------------------------------------------------------------------------------------------------------------------------------------------------------------------------------------------------------------------------------------------------------------------------------------------------------------------------------------------------------------------------------------------------------------------------------------------------------------------------------------------------------------------------------------------------------------------------------------------------------------------------------------------------------------------------------------------------------------------------------------------------------------------------------------------------------------------------------------------------------------------------------------------------------------------------------------------------------------------------------------------------------------------------------------------------------------------------------------------------------------------------------------------------------------------------------------------------------------------------------------------------------------------------------------------------------------------------------------------------------------------------------------------------------------------------------------------------------------------------------|
| 1086 | <p>1yv7A<br/>(102)</p> <p>1h8xA<br/>(125)</p> | N<br>24.51 | <p><b>TM-align:</b> aliSize=86 (resi) RMSD=2.50 (Å)<br/>           dwltfqkhi tnt-----R--DVC DNI STNLFH---CKDKNTFIYSRPEPVKAICKG-Iia-----SKNVLTTSEFYLSDCNVTSRP----CKYKLLKSTNKFSVTCEN--QAPVHFVGVG-<br/>           -----kesaaakferqhmdsgnspSsSTYCNQMRRRNMtqgrCKPVNTFVHEPLVDVQNVCFQeK--vtckngqGNCYKSNSSMHITDCRLTNGSRYPNCAVYRTSOKERHII VACEGspYVPVHFDA SVE</p> <p><b>SARST:</b> aliSize=96 (resi) RMSD=12.82 (Å)<br/>           d----WLT FQKKHIT-NT---RDVCDNI StNLFHC-----NDKNTFIYSRPEPVKAICKGI IAS-----KNVLTTSEFYLSDCNVT----SRPcKYKLLKSTNKFSVTCEN--QAPVHFVGVG---vg<br/>           -kesAAAKFERQHMDsGNSpsSSSTYCNQM-RRRNMtqgrCKPVNTFVHEPLVDVQNVCFQEKVTckngqGNCYKSNSSMHITDCRLTNGSRYPNCAVYRTSOKERHII VACEGspYVPVHFDA sve--</p> <p><b>BLAST:</b> aliSize=52 (resi) iden=29.70% (30/102) simi=51.49% (52/102)<br/>           dwlt-----FQKKHITN-----TRDVC DNI ST-NLFH---CKDKNTFIYSRPEPVKAIC-KGI IASKN-----VLTTSSEFYLSDCNVT--SR--CKYKLLKSTNKFSVTCENQ--APVHF-----vgvg<br/>           ----kesaaakFERQHMDsgnspSsSTYCNQMRRRNMtqgrCKPVNTFVHEPLVDVQNVCFQEKVTckngqGNCYKSNSSMHITDCRLTNGSRYPNCAVYRTSOKERHII VACEGspYVPVHFdasve----</p> <p><b>Proposed:</b> aliSize=97 (resi) RMSD=1.67 (Å)<br/>           --PDWLT FQKKHITN-TRD-----vDVC DNI ST-NLFH---CKDKNTFIYSRPEPVKAICK-----giiaSKNVLTTSEFYLSDCNVTSRP----CKYKLLKSTNKFSVTCEN--QAPVHFVGVG-<br/>           keSAAAKFERQHMDsgnspSsSTYCNQMRRRNMtqgrCKPVNTFVHEPLVDVQNVCFQekvtckngq----GNCYKSNSSMHITDCRLTNGSRYPNCAVYRTSOKERHII VACEGspYVPVHFDA SVE</p>                                        |
| 1087 | <p>1k5aA<br/>(118)</p> <p>1h8xA<br/>(125)</p> | N<br>34.75 | <p><b>TM-align:</b> aliSize=98 (resi) RMSD=2.00 (Å)<br/>           nsrythfl tqhydakpq-----GR-DDRYCESIMRRRGLTS-PCDINTFIHGKRSIKAI CEnknGNPHRE-----NLRI SKSSFQVITCKLHGGSPWPPQYRATAGFRNVVACEN--GLPVHLDQSA<br/>           -----kesaaakferqhmdsgnspSsSTYCNQMRRRNMtqgrCKPVNTFVHEPLVDVQNVCF---QEKVTckngqGNCYKSNSSMHITDCRLTNGSRYPNCAVYRTSOKERHII VACEGspYVPVHFDA SVE</p> <p><b>SARST:</b> aliSize=107 (resi) RMSD=13.33 (Å)<br/>           ns---RYTHLTOHYDAKPO--GRDDR YCESIMRRRGLTS-PCDINTFIHGKRSIKAI CEnknGNPH-RE-----LRI SKSSFQVITCKLHGGSPWPPQYRATAGFRNVVACEN--GLPVHL-----dqsaa<br/>           --kesAAAKFERQHMDSGNSpsSSSTYCNQMRRR-RRNMtqgrCKPVNTFVHEPLVDVQNVCF---FQEKVTckngqGNCYKSNSSMHITDCRLTNGSRYPNCAVYRTSOKERHII VACEGspYVPVHFdasve----</p> <p><b>BLAST:</b> aliSize=65 (resi) iden=38.14% (45/118) simi=55.08% (65/118)<br/>           nsryth-----LTOHYDA--KPOGrDDR YCESIMRRRGLTS-PCDINTFIHG---NKRSI-----KAI CENKNGNPHRENl riskSSSFQVITCKLHGGSPWPPQYRATAGFRNVVACENG--LPVHLDQSA--aa<br/>           -----kesaaakFERQHMDSGNSpsSSSTYCNQMRRRNMtqgrCKPVNTFVHEPLVDVQNVCF---FQEKVTckngqGNCYKSNSSMHITDCRLTNGSRYPNCAVYRTSOKERHII VACEGspYVPVHFdasve--</p> <p><b>Proposed:</b> aliSize=111 (resi) RMSD=1.50 (Å)<br/>           -NSRYTHLTOHYDAKPOGR--ddRYCESIMRRRGLTS-PCDINTFIHGKRSIKAI CEnknGNPHRE-----NLRI SKSSFQVITCKLHGGSPWPPQYRATAGFRNVVACEN--GLPVHLDQSA--a<br/>           keSAAAKFERQHMDSGNSpsSSSTYCNQMRRRNMtqgrCKPVNTFVHEPLVDVQNVCF---QEKVTckngqGNCYKSNSSMHITDCRLTNGSRYPNCAVYRTSOKERHII VACEGspYVPVHFDA SVE-</p>          |
| 1088 | <p>1un5A<br/>(121)</p> <p>1h8xA<br/>(125)</p> | N<br>35.54 | <p><b>TM-align:</b> aliSize=99 (resi) RMSD=2.03 (Å)<br/>           nsrythfl tqhydakpq-----GR-DDRYCESIMRRRGLTSDRCKPINTFIHGKRSIKAI CEnknGNPHRE-----NLRI SKSSFQVITCKLHGGSPWPPQYRATAGFRNVVACEN--GLPVHLDQSI FR<br/>           -----kesaaakferqhmdsgnspSsSTYCNQMRRRNMtqgrCKPVNTFVHEPLVDVQNVCF---QEKVTckngqGNCYKSNSSMHITDCRLTNGSRYPNCAVYRTSOKERHII VACEGspYVPVHFDA SVE</p> <p><b>SARST:</b> aliSize=106 (resi) RMSD=14.68 (Å)<br/>           s---RYTHLTOHYDAKPOGrDDR---YCESIMRRRGLTSDRCKPINTFIHGKRSIKAI C-----ENKNGNPHrenLRI SKSSFQVITCKLHGGSPWPPQYRATAGFRNVVACEN--GLPVHL-----dqsifr<br/>           -kesAAAKFERQHMDSGNS--PSsSTYCNQMRRRNMtqgrCKPVNTFVHEPLVDVQNVCF---FQEKVTckngqGNCYKSNSSMHITDCRLTNGSRYPNCAVYRTSOKERHII VACEGspYVPVHFdasve-----</p> <p><b>BLAST:</b> aliSize=68 (resi) iden=39.50% (47/121) simi=57.14% (68/121)<br/>           sryth-----LTOHYDA--KPOGrDDR YCESIMRRRGLTSDRCKPINTFIHG---NKRSI-----KAI CENKNGNPHRENl riskSSSFQVITCKLHGGSPWPPQYRATAGFRNVVACENG--LPVHLDQSI -fr<br/>           -----kesaaakFERQHMDSGNSpsSSSTYCNQMRRRNMtqgrCKPVNTFVHEPLVDVQNVCF---FQEKVTckngqGNCYKSNSSMHITDCRLTNGSRYPNCAVYRTSOKERHII VACEGspYVPVHFdasve--</p> <p><b>Proposed:</b> aliSize=112 (resi) RMSD=1.52 (Å)<br/>           n--SRYTHLTOHYDAKPOGR--ddRYCESIMRRRGLTSDRCKPINTFIHGKRSIKAI CEnknGNPHRE-----NLRI SKSSFQVITCKLHGGSPWPPQYRATAGFRNVVACEN--GLPVHLDQSI --frr<br/>           -keSAAAKFERQHMDSGNSpsSSSTYCNQMRRRNMtqgrCKPVNTFVHEPLVDVQNVCF---QEKVTckngqGNCYKSNSSMHITDCRLTNGSRYPNCAVYRTSOKERHII VACEGspYVPVHFDA SVE-</p> |

|      |                                                     |   |       |                                                                                                                                                                                                                                                                                                                                                                                                                                                                                                                                                                                                                                                                                                                                                                                                                                                                                                                                                                                                                                                                                                                                                                                                                                                                                                                                                                                                                                                                                                                                            |
|------|-----------------------------------------------------|---|-------|--------------------------------------------------------------------------------------------------------------------------------------------------------------------------------------------------------------------------------------------------------------------------------------------------------------------------------------------------------------------------------------------------------------------------------------------------------------------------------------------------------------------------------------------------------------------------------------------------------------------------------------------------------------------------------------------------------------------------------------------------------------------------------------------------------------------------------------------------------------------------------------------------------------------------------------------------------------------------------------------------------------------------------------------------------------------------------------------------------------------------------------------------------------------------------------------------------------------------------------------------------------------------------------------------------------------------------------------------------------------------------------------------------------------------------------------------------------------------------------------------------------------------------------------|
| 1089 | <p>1a5qA<br/>(124)</p> <hr/> <p>1h8xA<br/>(125)</p> | N | 69.35 | <p><b>TM-align:</b> aliSize=105 (resi) RMSD=1.66 (Å)<br/> ketaaakferqhmds <b>ts</b>-----AAAs-SSNYCNQMMKSRNLTKDRCKPVNTFVHESLADVQAVCSQKNACKNGQTNCYQSYSTMSITDCRETGSSKIANCAYKTTQANKHIIVACEGNPYVPVHFDASV-<br/> -----kesaaakferqhmdsg<b>nsPS-s</b>SSNYCNQMMRRRNMTOGRCKPVNTFVHESLADVQAVCSQKNACKNGQTNCYQSYSTMSITDCRETGSSKIANCAYKTTQANKHIIVACEGNPYVPVHFDASVe</p> <p><b>SARST:</b> aliSize=98 (resi) RMSD=16.11 (Å)<br/> k-ETAAAKFERQHMD<b>ST</b>---SAA<b>ss</b>NYCNQMMKSRNLTKDRCKPVNTFVHESLADVQAVCSQKNACKN-----Qtn cyqsy stms itdcretgsskIANCAYKTTQANKHIIVACEGNPYVPVHFDAS--v<br/> -kESAAAKFERQHMD<b>SG</b><b>nsPS</b><b>SSS</b>---TYCNQMMRRRNMTOGRCKPVNTFVHESLADVQAVCSQKNACKNGGgnc yk sn s sm hitdcr ltn <b>SS</b>-----RYPNCAYRTSOKERHIIVACEGSPYVPVHFDASve-</p> <p><b>BLAST:</b> aliSize=103 (resi) iden=72.58% (90/124) simi=83.06% (103/124)<br/> <b>KE</b>TAAAKFERQHMD<b>ST</b>AA<b>SSS</b>NYCNQMMKSRNLTKDRCKPVNTFVHESLADVQAVCSQKNACKNGQTNCYQSYSTMSITDCRETGSSKIANCAYKTTQANKHIIVACEGNPYVPVHFDASV-<br/> <b>KE</b>SAAAKFERQHMD<b>SG</b><b>NSP</b><b>SSS</b>TYCNQMMRRRNMTOGRCKPVNTFVHESLADVQAVCSQKNACKNGGNCYKNSSMHITDCRLNGSRYPNCAYRTSOKERHIIVACEGSPYVPVHFDASVe</p> <p><b>Proposed:</b> aliSize=122 (resi) RMSD=1.03 (Å)<br/> <b>KE</b>TAAAKFERQHMD<b>ST</b>AA<b>SSS</b>NYCNQMMKSRNLTKDRCKPVNTFVHESLADVQAVCSQKNACKN-NGQtNCYQSYSTMSITDCRETGSSKIANCAYKTTQANKHIIVACEGNPYVPVHFDASV-<br/> <b>KE</b>SAAAKFERQHMD<b>SG</b>-<b>SP</b><b>s</b><b>SSS</b>TYCNQMMRRRNMTOGRCKPVNTFVHESLADVQAVCSQKNACKNGGNCYKNSSMHITDCRLNGSRYPNCAYRTSOKERHIIVACEGSPYVPVHFDASVe</p> |
| 1090 | <p>11bgA<br/>(124)</p> <hr/> <p>1r3mB<br/>(122)</p> | N | 99.18 | <p><b>TM-align:</b> aliSize=104 (resi) RMSD=1.02 (Å)<br/> kesaaakferqhmds <b>gnsps</b>-----SSNYCNLMCCRKMTQGKCKPVNTFVHESLADVKAVCSQKKVTCKNGQTNCYQSKSTMRTDCRETGSSKYPNCAYKTTQVEKHIIVACGGKPSVPVHFDASV<br/> -----kesaaakferqhmds <b>gnsPS</b>SSNYCNLMCCRKMTQGKCKPVNTFVHESLADVKAVCSQKKVTCKNGQTNCYQSKSTMRTDCRETGSSKYPNCAYKTTQVEKHIIVACGGKPSVPVHFDASV</p> <p><b>SARST:</b> aliSize=120 (resi) RMSD=9.91 (Å)<br/> k-ESAAAKFERQHMD<b>SG</b><b>NSP</b><b>SSs</b>SNYCNLMCCRKMTQGKCKPVNTFVHESLADVKAVCSQKKVTCKNGQTNCYQSKSTMRTDCRETGSSKYPNCAYKTTQVEKHIIVACGGKPSVPVHFDAS-v<br/> -kESAAAKFERQHMD<b>SG</b><b>NSP</b><b>S</b>--SNYCNLMCCRKMTQGKCKPVNTFVHESLADVKAVCSQKKVTCKNGQTNCYQSKSTMRTDCRETGSSKYPNCAYKTTQVEKHIIVACGGKPSVPVHFDASv-</p> <p><b>BLAST:</b> aliSize=122 (resi) iden=100.00% (122/122) simi=100.00% (122/122)<br/> <b>KE</b>SAAAKFERQHMD<b>SG</b><b>NSP</b><b>SSs</b>SNYCNLMCCRKMTQGKCKPVNTFVHESLADVKAVCSQKKVTCKNGQTNCYQSKSTMRTDCRETGSSKYPNCAYKTTQVEKHIIVACGGKPSVPVHFDASV<br/> <b>KE</b>SAAAKFERQHMD<b>SG</b><b>NSP</b><b>S</b>--SNYCNLMCCRKMTQGKCKPVNTFVHESLADVKAVCSQKKVTCKNGQTNCYQSKSTMRTDCRETGSSKYPNCAYKTTQVEKHIIVACGGKPSVPVHFDASV</p> <p><b>Proposed:</b> aliSize=122 (resi) RMSD=0.70 (Å)<br/> <b>KE</b>SAAAKFERQHMD<b>SG</b><b>NSP</b><b>Ss</b>SNYCNLMCCRKMTQGKCKPVNTFVHESLADVKAVCSQKKVTCKNGQTNCYQSKSTMRTDCRETGSSKYPNCAYKTTQVEKHIIVACGGKPSVPVHFDASV<br/> <b>KE</b>SAAAKFERQHMD<b>SG</b><b>N</b>-<b>P</b>-<b>S</b>SNYCNLMCCRKMTQGKCKPVNTFVHESLADVKAVCSQKKVTCKNGQTNCYQSKSTMRTDCRETGSSKYPNCAYKTTQVEKHIIVACGGKPSVPVHFDASV</p>                   |
| 1091 | <p>11bgA<br/>(124)</p> <hr/> <p>1a2wA<br/>(124)</p> | N | 80.65 | <p><b>TM-align:</b> aliSize=104 (resi) RMSD=0.70 (Å)<br/> kesaaakferqhmds <b>gnsps</b>-----SSSNYCNLMCCRKMTQGKCKPVNTFVHESLADVKAVCSQKKVTCKNGQTNCYQSKSTMRTDCRETGSSKYPNCAYKTTQVEKHIIVACGGKPSVPVHFDASV<br/> -----ketaaakferqhmds <b>st</b>sa<b>SS</b>NYCNQMMKSRNLTKDRCKPVNTFVHESLADVQAVCSQKNACKNGQTNCYQSYSTMSITDCRETGSSKYPNCAYKTTQANKHIIVACEGNPYVPVHFDASV</p> <p><b>SARST:</b> aliSize=121 (resi) RMSD=11.86 (Å)<br/> k-ESAAAKFERQHMD<b>SG</b><b>NSP</b><b>SSs</b>SNYCNLMCCRKMTQGKCKPVNTFVHESLADVKAVCSQKKVTCKNGQTNCYQSKSTMRTDCRETGSSKYPNCAYKTTQVEKHIIVACGGKPSVPVHFDAS-v<br/> -kETAAAKFERQHMD<b>ST</b>SA<b>SS</b>-SNYCNQMMKSRNLTKDRCKPVNTFVHESLADVQAVCSQKNACKNGQTNCYQSYSTMSITDCRETGSSKYPNCAYKTTQANKHIIVACEGNPYVPVHFDASv-</p> <p><b>BLAST:</b> aliSize=107 (resi) iden=81.45% (101/124) simi=86.29% (107/124)<br/> <b>KE</b>SAAAKFERQHMD<b>SG</b><b>NSP</b><b>SSS</b>SNYCNLMCCRKMTQGKCKPVNTFVHESLADVKAVCSQKKVTCKNGQTNCYQSKSTMRTDCRETGSSKYPNCAYKTTQVEKHIIVACGGKPSVPVHFDASV<br/> <b>KE</b>TAAAKFERQHMD<b>ST</b>SA<b>SS</b>SNYCNQMMKSRNLTKDRCKPVNTFVHESLADVQAVCSQKNACKNGQTNCYQSYSTMSITDCRETGSSKYPNCAYKTTQANKHIIVACEGNPYVPVHFDASV</p> <p><b>Proposed:</b> aliSize=123 (resi) RMSD=0.90 (Å)<br/> <b>KE</b>SAAAKFERQHMD<b>SG</b><b>NSP</b><b>S</b>-<b>s</b>SNYCNLMCCRKMTQGKCKPVNTFVHESLADVKAVCSQKKVTCKNGQTNCYQSKSTMRTDCRETGSSKYPNCAYKTTQVEKHIIVACGGKPSVPVHFDASV<br/> <b>KE</b>TAAAKFERQHMD<b>ST</b>SA<b>SS</b>-<b>SS</b>NYCNQMMKSRNLTKDRCKPVNTFVHESLADVQAVCSQKNACKNGQTNCYQSYSTMSITDCRETGSSKYPNCAYKTTQANKHIIVACEGNPYVPVHFDASV</p>                        |

|      |                                                     |   |       |                                                                                                                                                                                                                                                                                                                                                                                                                                                                                                                                                                                                                                                                                                                                                                                                                                                                                                                                                                                                                                                                                                                                                                                                                                                                                                                                                                                                                |
|------|-----------------------------------------------------|---|-------|----------------------------------------------------------------------------------------------------------------------------------------------------------------------------------------------------------------------------------------------------------------------------------------------------------------------------------------------------------------------------------------------------------------------------------------------------------------------------------------------------------------------------------------------------------------------------------------------------------------------------------------------------------------------------------------------------------------------------------------------------------------------------------------------------------------------------------------------------------------------------------------------------------------------------------------------------------------------------------------------------------------------------------------------------------------------------------------------------------------------------------------------------------------------------------------------------------------------------------------------------------------------------------------------------------------------------------------------------------------------------------------------------------------|
| 1092 | <p>11bgA<br/>(124)</p> <hr/> <p>1h8xA<br/>(125)</p> | N | 71.77 | <p><b>TM-align:</b> aliSize=104 (resi)      RMSD=1.47 (Å)<br/> kesaaakferqhmdsgnspss-----SSSNYCNLMMCCRKMTQGKCKPVNTFVHESLADVKAVCSOKKVTCKNGQTNCYQSKSTMRTDCREIGSSKYPNCAYKTTQVEKHIIVACGGKPSVPVHFDASV-<br/> -----kesaaakferqhmdsgnspssSSSTYCNQMMRRRNMTQGRCKPVNTFVHEPLVDVQNVCFQEKVTCKNGGNCYKSNSSMHI TDCRLINGSRYPNCAYRTSOKERHIIVACEGSPYVPVHFDASVe</p> <p><b>SARST:</b>      aliSize=120 (resi)      RMSD=11.31 (Å)<br/> k-ESAAAKFERQHMD--SGNSPSSsNYCNLMMCCRKMTQGKCKPVNTFVHESLADVKAVCSOKKVTCKNGQTNCYQSKSTMRTDCREIGSSKYPNCAYKTTQVEKHIIVACGGKPSVPVHFDASV--v<br/> -kESAAAKFERQHMDsgNSPSSSS--TYCNQMMRRRNMTQGRCKPVNTFVHEPLVDVQNVCFQEKVTCKNGGNCYKSNSSMHI TDCRLINGSRYPNCAYRTSOKERHIIVACEGSPYVPVHFDASVe-</p> <p><b>BLAST:</b>      aliSize=105 (resi)      iden=77.42% (96/124)      simi=84.68% (105/124)<br/> KESAAAKFERQHMDSGNSPSSSSNYCNLMMCCRKMTQGKCKPVNTFVHESLADVKAVCSOKKVTCKNGQTNCYQSKSTMRTDCREIGSSKYPNCAYKTTQVEKHIIVACGGKPSVPVHFDASV-<br/> KESAAAKFERQHMDSGNSPSSSSTYCNQMMRRRNMTQGRCKPVNTFVHEPLVDVQNVCFQEKVTCKNGGNCYKSNSSMHI TDCRLINGSRYPNCAYRTSOKERHIIVACEGSPYVPVHFDASVe</p> <p><b>Proposed:</b> aliSize=122 (resi)      RMSD=1.05 (Å)<br/> KESAAAKFERQHMDSGnSPS-SSSNYCNLMMCCRKMTQGKCKPVNTFVHESLADVKAVCSOKKVTCKNG-KNgQTNCYQSKSTMRTDCREIGSSKYPNCAYKTTQVEKHIIVACGGKPSVPVHFDASV-<br/> KESAAAKFERQHMDSG-NSPSSSSTYCNQMMRRRNMTQGRCKPVNTFVHEPLVDVQNVCFQEKVTCKNG-OGNCYKSNSSMHI TDCRLINGSRYPNCAYRTSOKERHIIVACEGSPYVPVHFDASVe</p> |
| 1093 | <p>11baA<br/>(124)</p> <hr/> <p>1h8xA<br/>(125)</p> | N | 74.19 | <p><b>TM-align:</b> aliSize=104 (resi)      RMSD=1.43 (Å)<br/> kesaaakferqhmdsgnspss-----SSSNYCNLMMCCRKMTQGKCKPVNTFVHESLADVKAVCSOKKVTCKNGQTNCYQSKSTMRTDCREIGSSKYPNCAYKTTQVEKHIIVACGGKPSVPVHFDASV-<br/> -----kesaaakferqhmdsgnspssSSSTYCNQMMRRRNMTQGRCKPVNTFVHEPLVDVQNVCFQEKVTCKNGGNCYKSNSSMHI TDCRLINGSRYPNCAYRTSOKERHIIVACEGSPYVPVHFDASVe</p> <p><b>SARST:</b>      aliSize=120 (resi)      RMSD=11.65 (Å)<br/> k-ESAAAKFERQHMD--SGNSPSSsNYCNLMMCCRKMTQGKCKPVNTFVHESLADVKAVCSOKKVTCKNGQTNCYQSKSTMRTDCREIGSSKYPNCAYKTTQVEKHIIVACGGKPSVPVHFDASV--v<br/> -kESAAAKFERQHMDsgNSPSSSS--TYCNQMMRRRNMTQGRCKPVNTFVHEPLVDVQNVCFQEKVTCKNGGNCYKSNSSMHI TDCRLINGSRYPNCAYRTSOKERHIIVACEGSPYVPVHFDASVe-</p> <p><b>BLAST:</b>      aliSize=105 (resi)      iden=77.42% (96/124)      simi=84.68% (105/124)<br/> KESAAAKFERQHMDSGNSPSSSSNYCNLMMCCRKMTQGKCKPVNTFVHESLADVKAVCSOKKVTCKNGQTNCYQSKSTMRTDCREIGSSKYPNCAYKTTQVEKHIIVACGGKPSVPVHFDASV-<br/> KESAAAKFERQHMDSGNSPSSSSTYCNQMMRRRNMTQGRCKPVNTFVHEPLVDVQNVCFQEKVTCKNGGNCYKSNSSMHI TDCRLINGSRYPNCAYRTSOKERHIIVACEGSPYVPVHFDASVe</p> <p><b>Proposed:</b> aliSize=123 (resi)      RMSD=1.16 (Å)<br/> KESAAAKFERQHMDSGnSPS-SSSNYCNLMMCCRKMTQGKCKPVNTFVHESLADVKAVCSOKKVTCKNGQTNCYQSKSTMRTDCREIGSSKYPNCAYKTTQVEKHIIVACGGKPSVPVHFDASV-<br/> KESAAAKFERQHMDSG-NSPSSSSTYCNQMMRRRNMTQGRCKPVNTFVHEPLVDVQNVCFQEKVTCKNGGNCYKSNSSMHI TDCRLINGSRYPNCAYRTSOKERHIIVACEGSPYVPVHFDASVe</p>       |
