# Supplementary material for: Detection and Alignment of 3D Domain Swapping Proteins Using Angle-Distance Image-Based Secondary Structural Matching Techniques
Source: PubMed Central journal article supplement (PMC2955075; doi:10.1371/journal.pone.0013361), 2010-10-14
Supplement: pone.0013361.s010.pdf [file pone.0013361.s010.pdf]

**Table S6. Number of SSEs in the swapped domains**

| Number of SSEs | Number of swapped domains possessing specific numbers of SSEs |                            |                        |
|----------------|---------------------------------------------------------------|----------------------------|------------------------|
|                | N-terminal-swapped domains                                    | C-terminal-swapped domains | Middle-swapped domains |
| 0              | 26                                                            | 21                         | 12                     |
| 1              | 118                                                           | 253                        | 16                     |
| 2              | 58                                                            | 89                         | 16                     |
| 3              | 25                                                            | 46                         | 1                      |
| $\geq 4$       | 35                                                            | 39                         | 0                      |

Here an SSE means an  $\alpha$ -helix or a  $\beta$ -strand. The number of SSEs that a swapped domain contains roughly reflects the size of the domain. The ranges of SSEs were extracted from the PDB files according to the HELIX and SHEET records.
